# Supplementary material for: Metabolic and proteomic signatures of type 2 diabetes subtypes in an Arab population
Source: bioRxiv or medRxiv preprint supplement (doi:10.1101/2022.01.13.22269204), 2022-01-13

9216-100\_3 : Plexin-B2

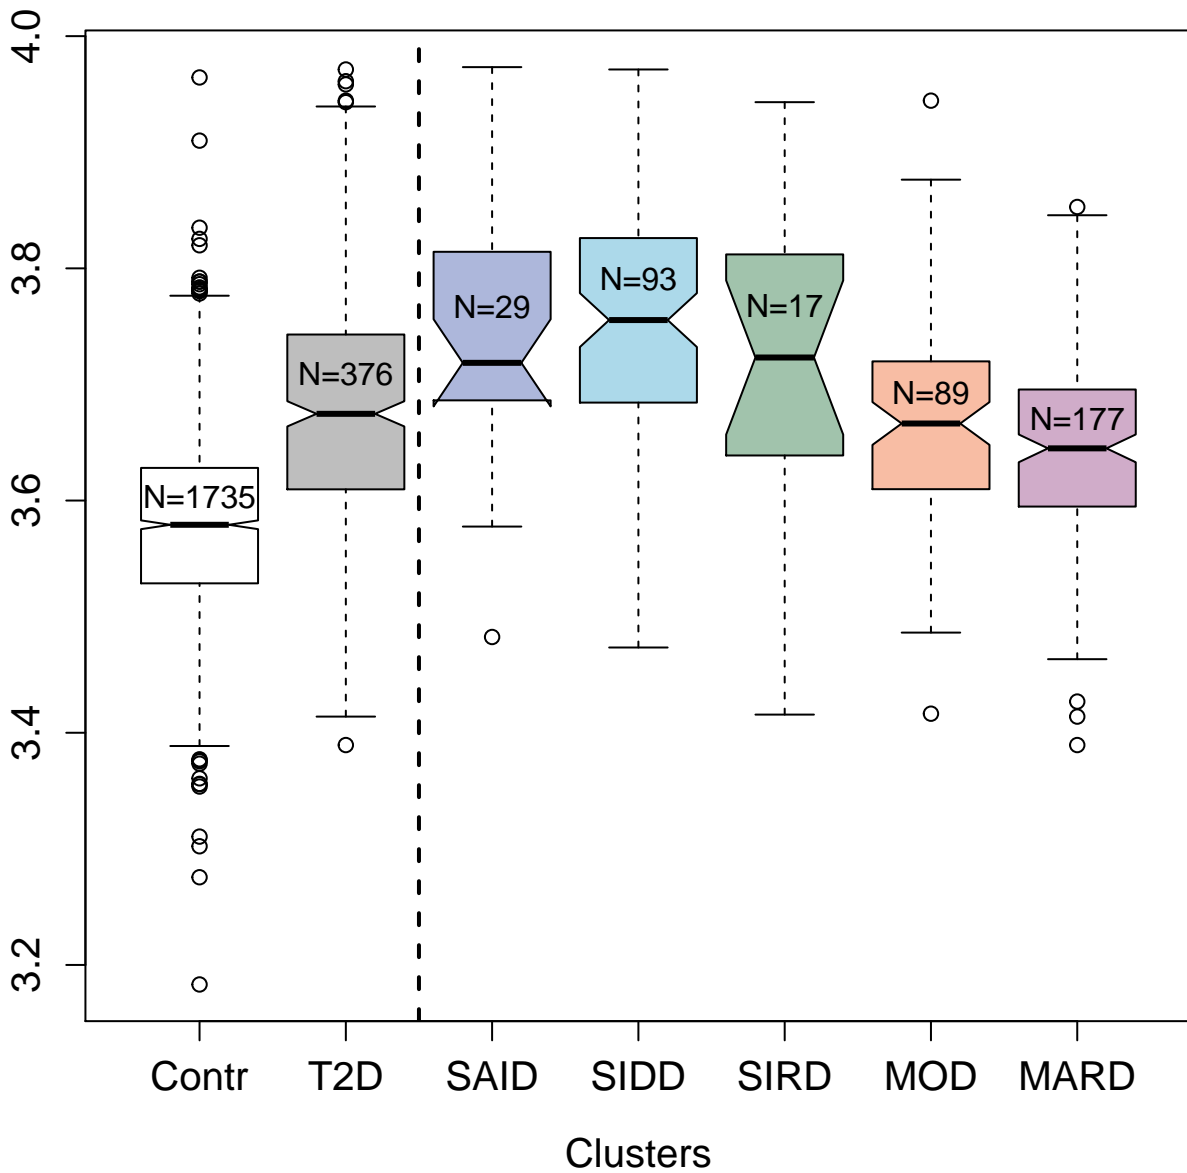

3186-2\_2 : Complement C2

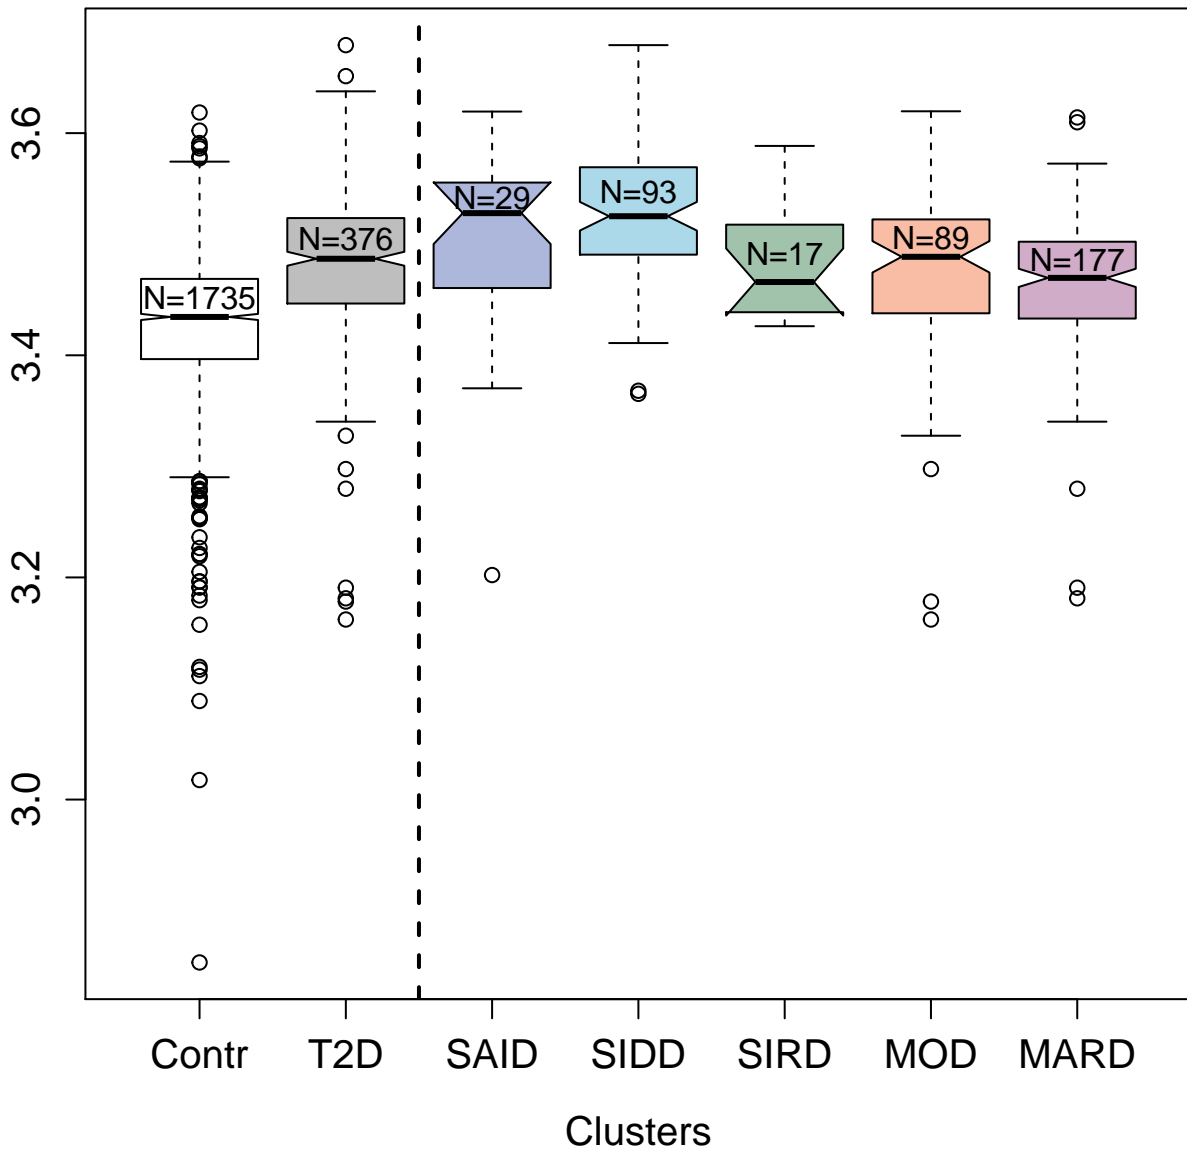

4801-13\_3 : Lactoperoxidase

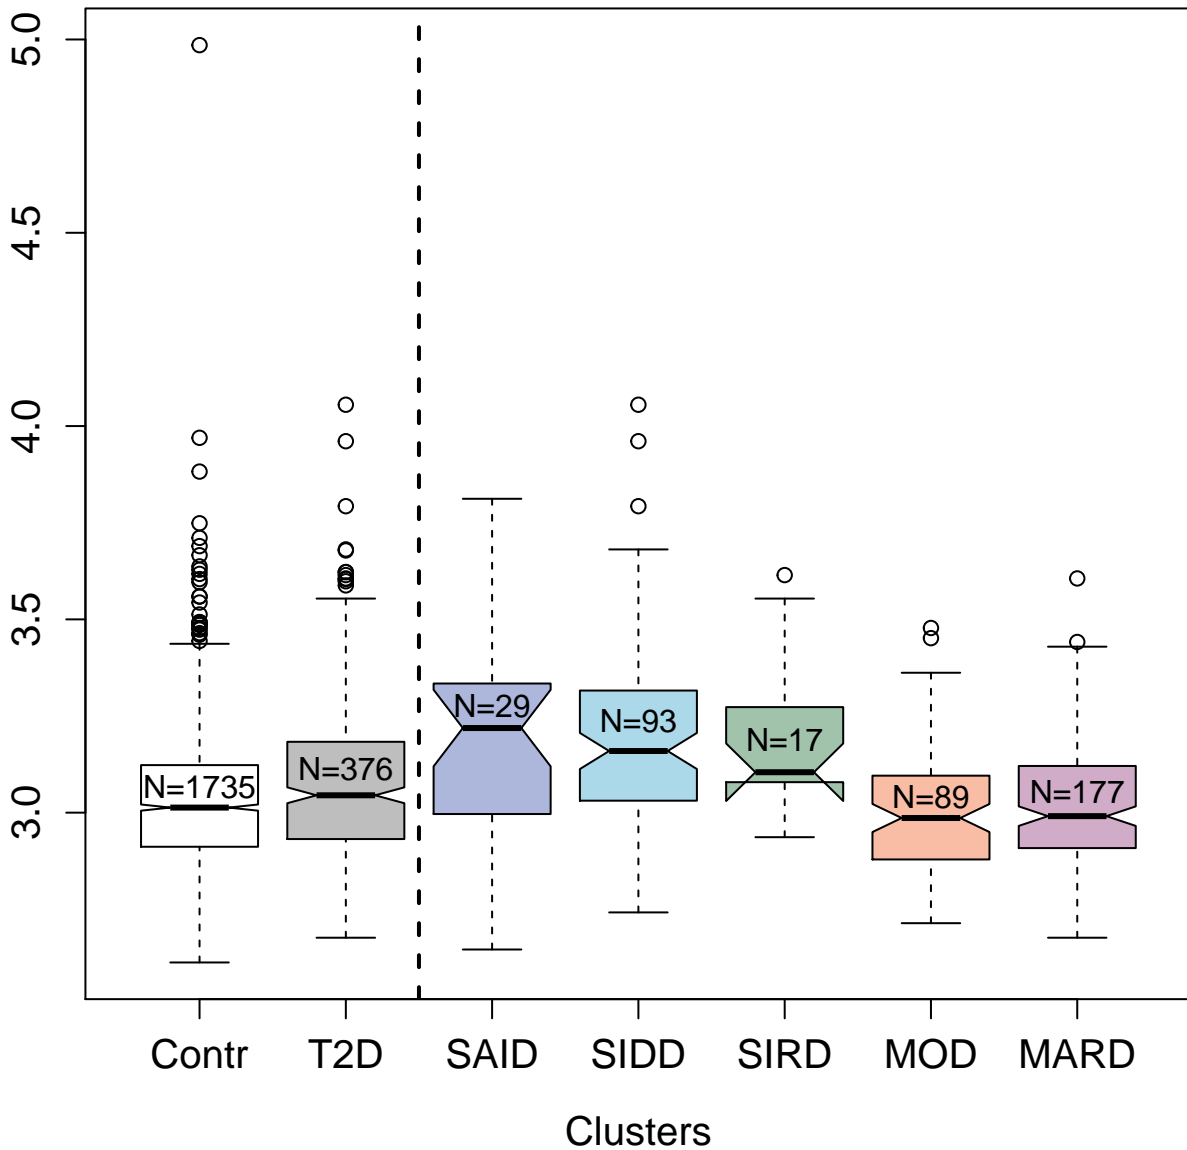

8484-24\_3 : Leptin

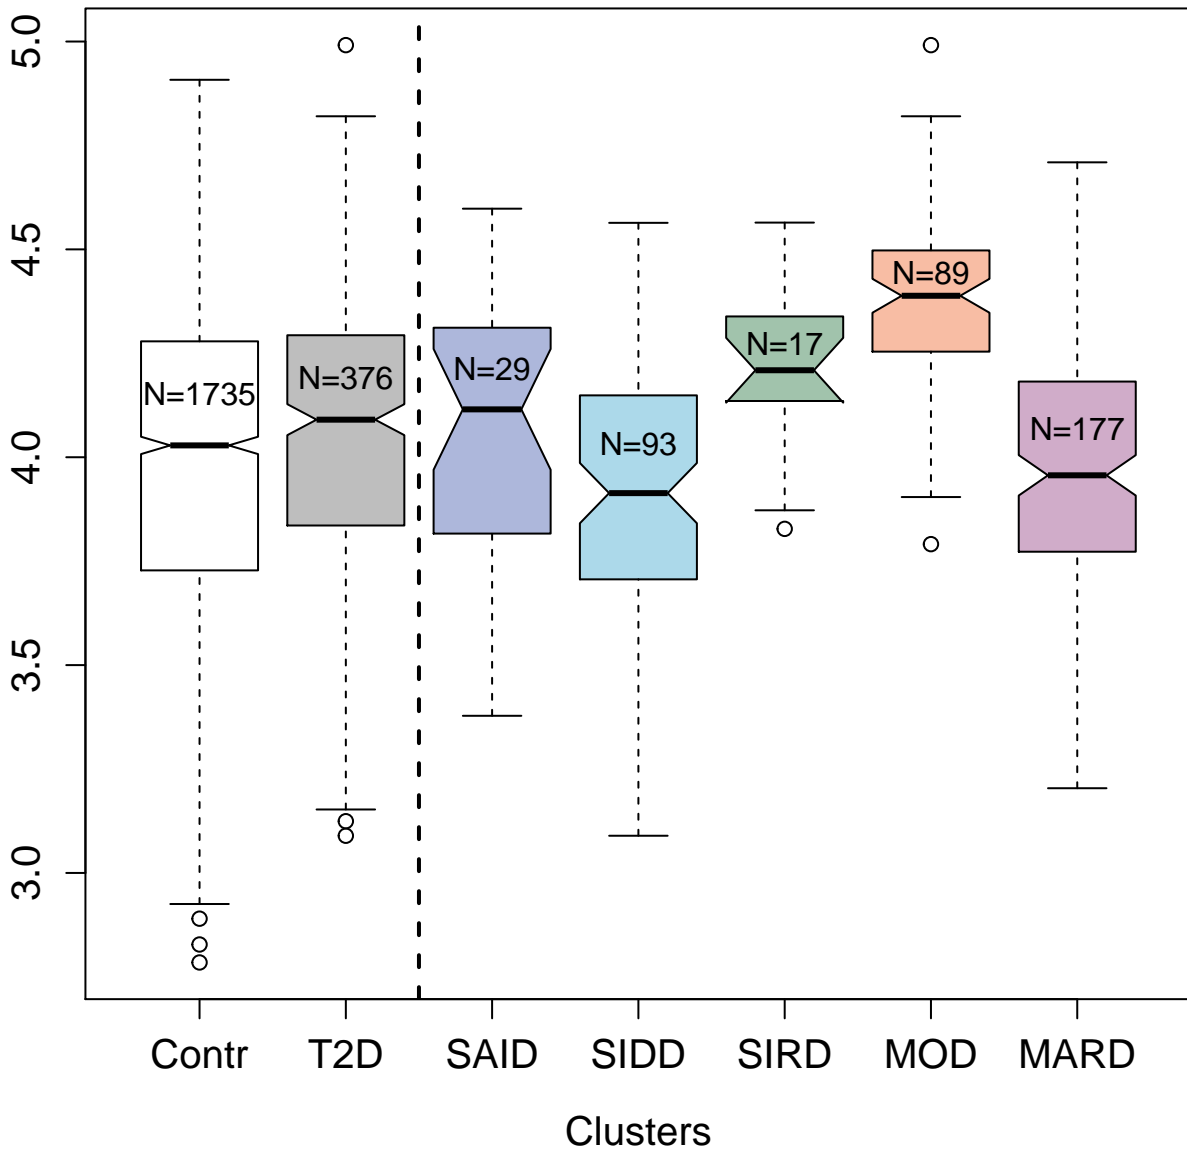

4413-3\_2 : Antileukoproteinase

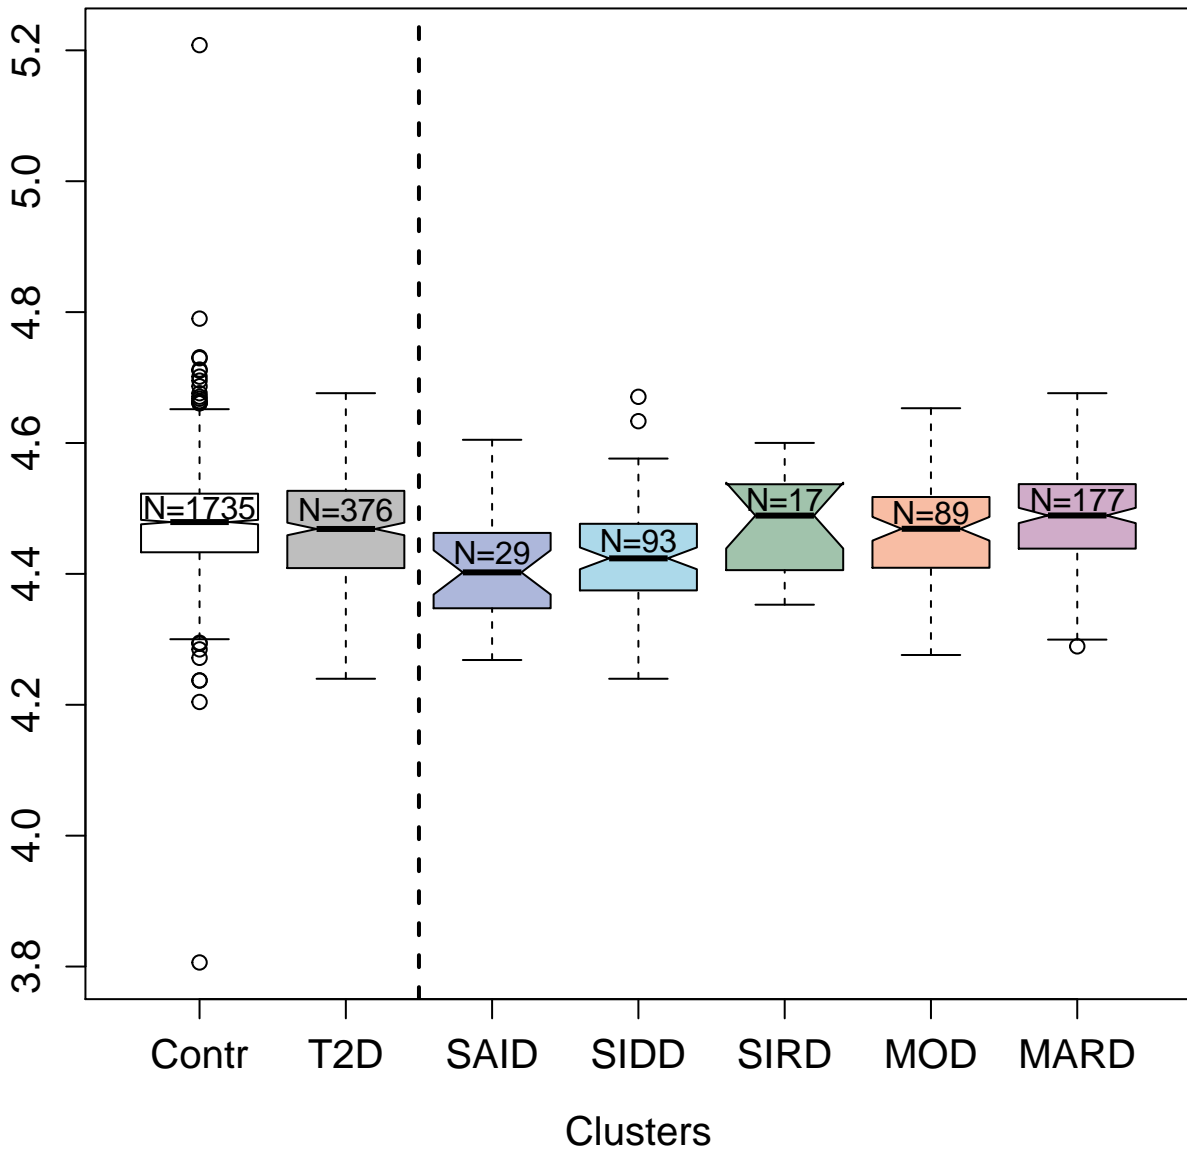

2687-2\_1 : Melanoma-derived growth regulatory

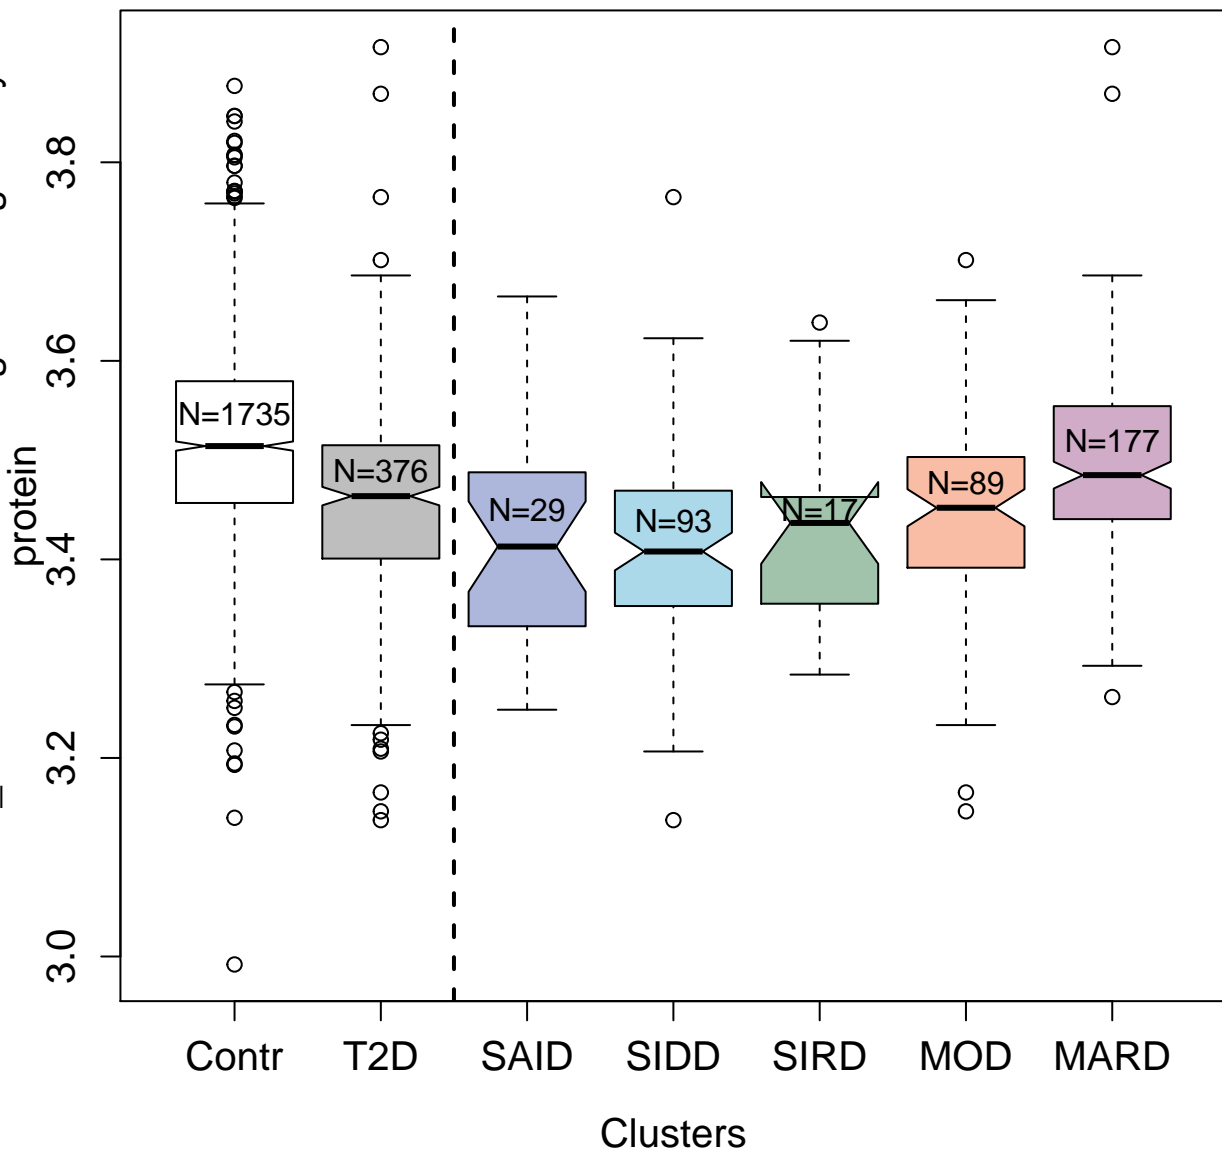

2913-1\_2 : C-C motif chemokine 23

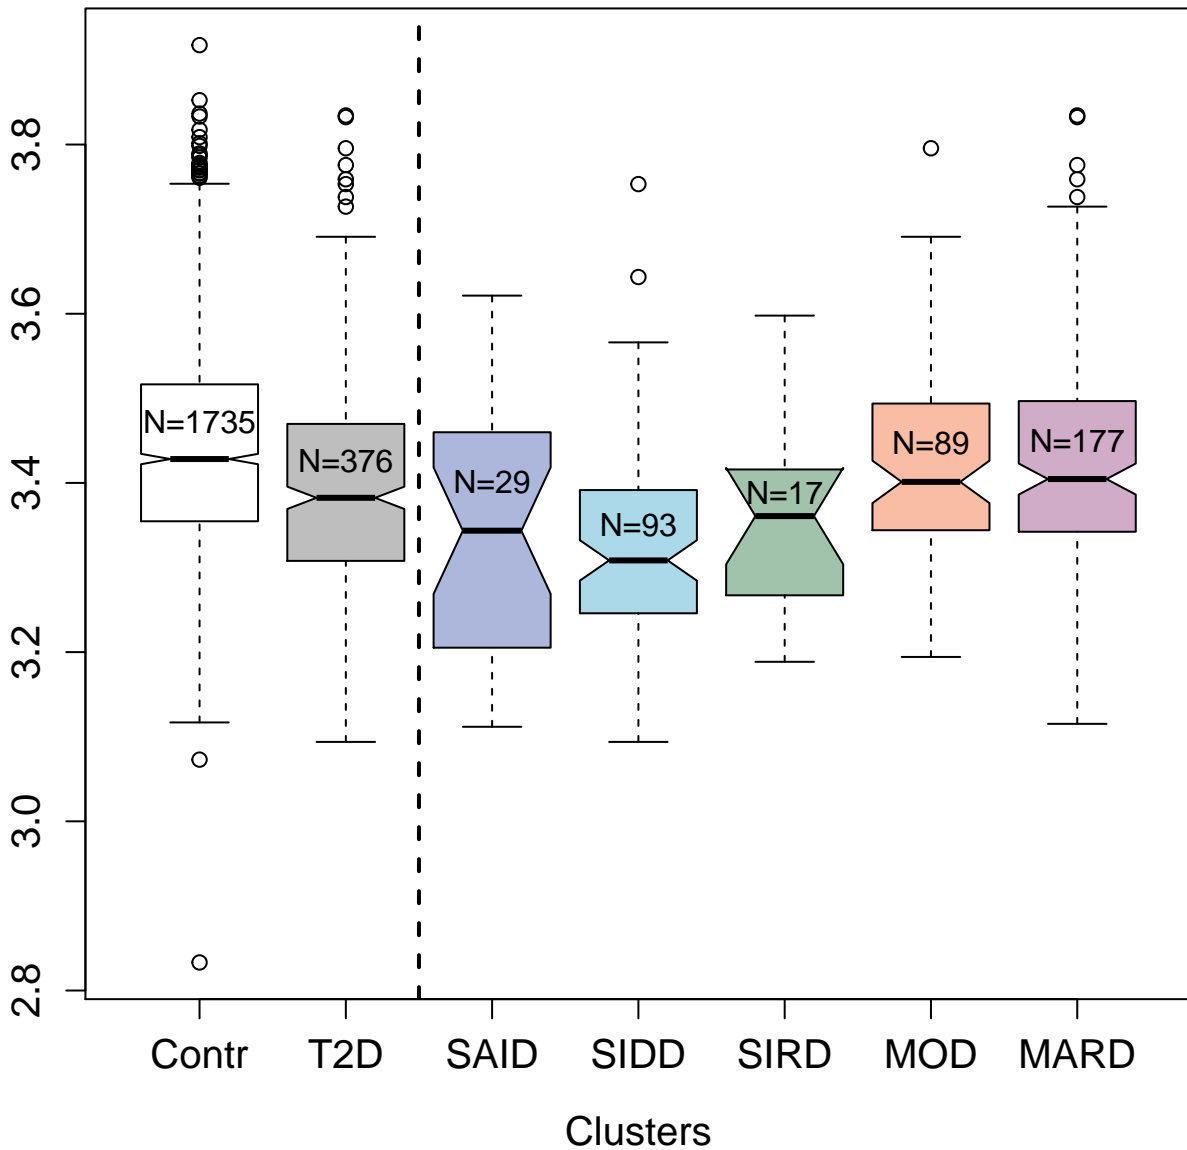

11514-196\_3 : CD59 glycoprotein

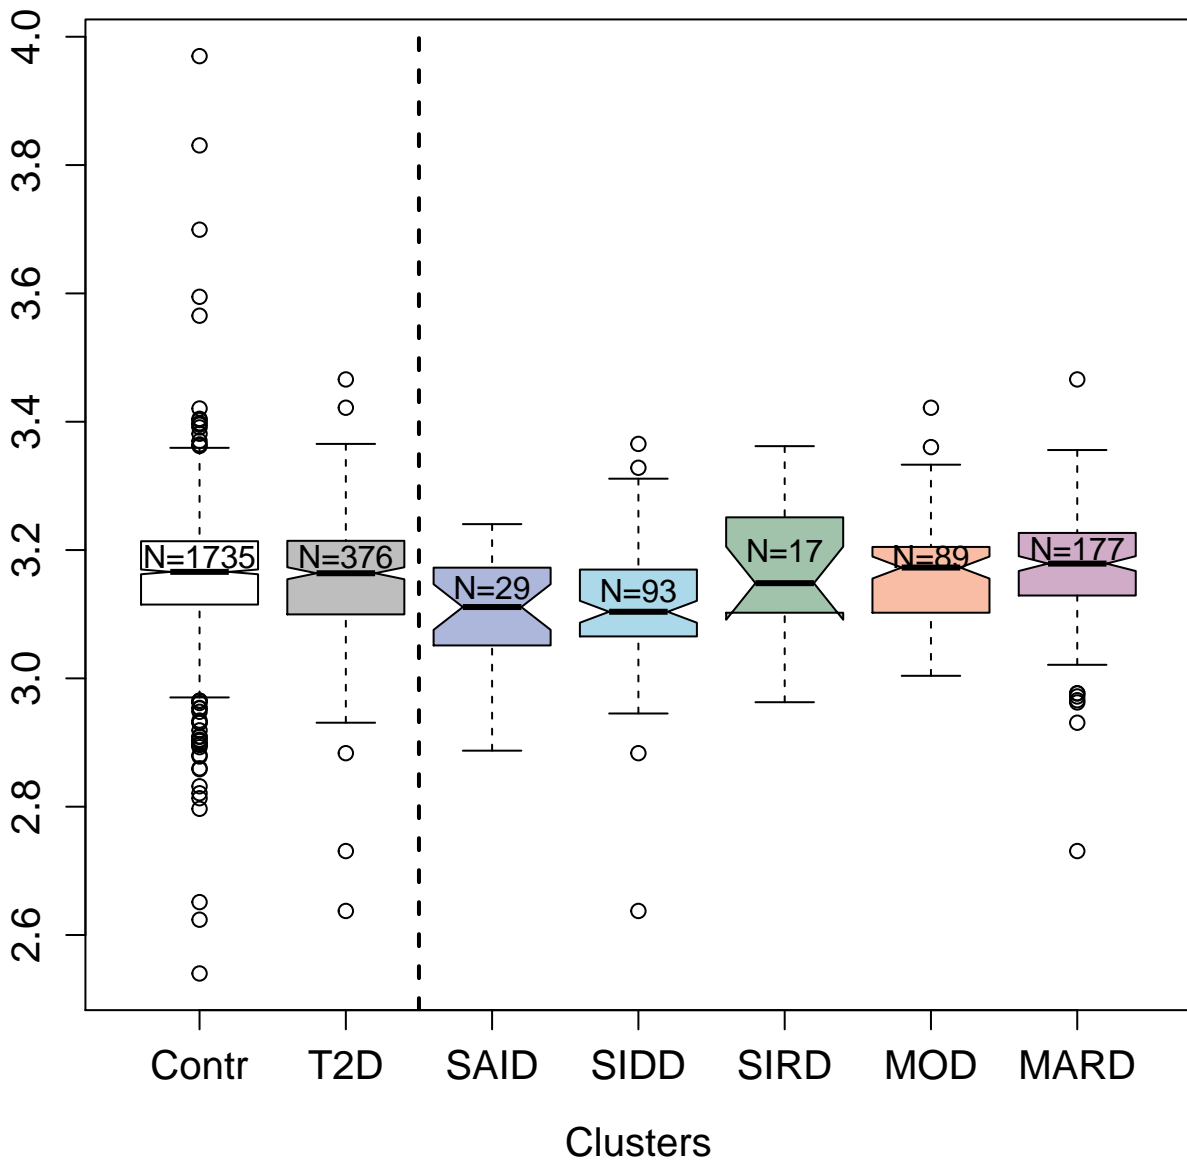



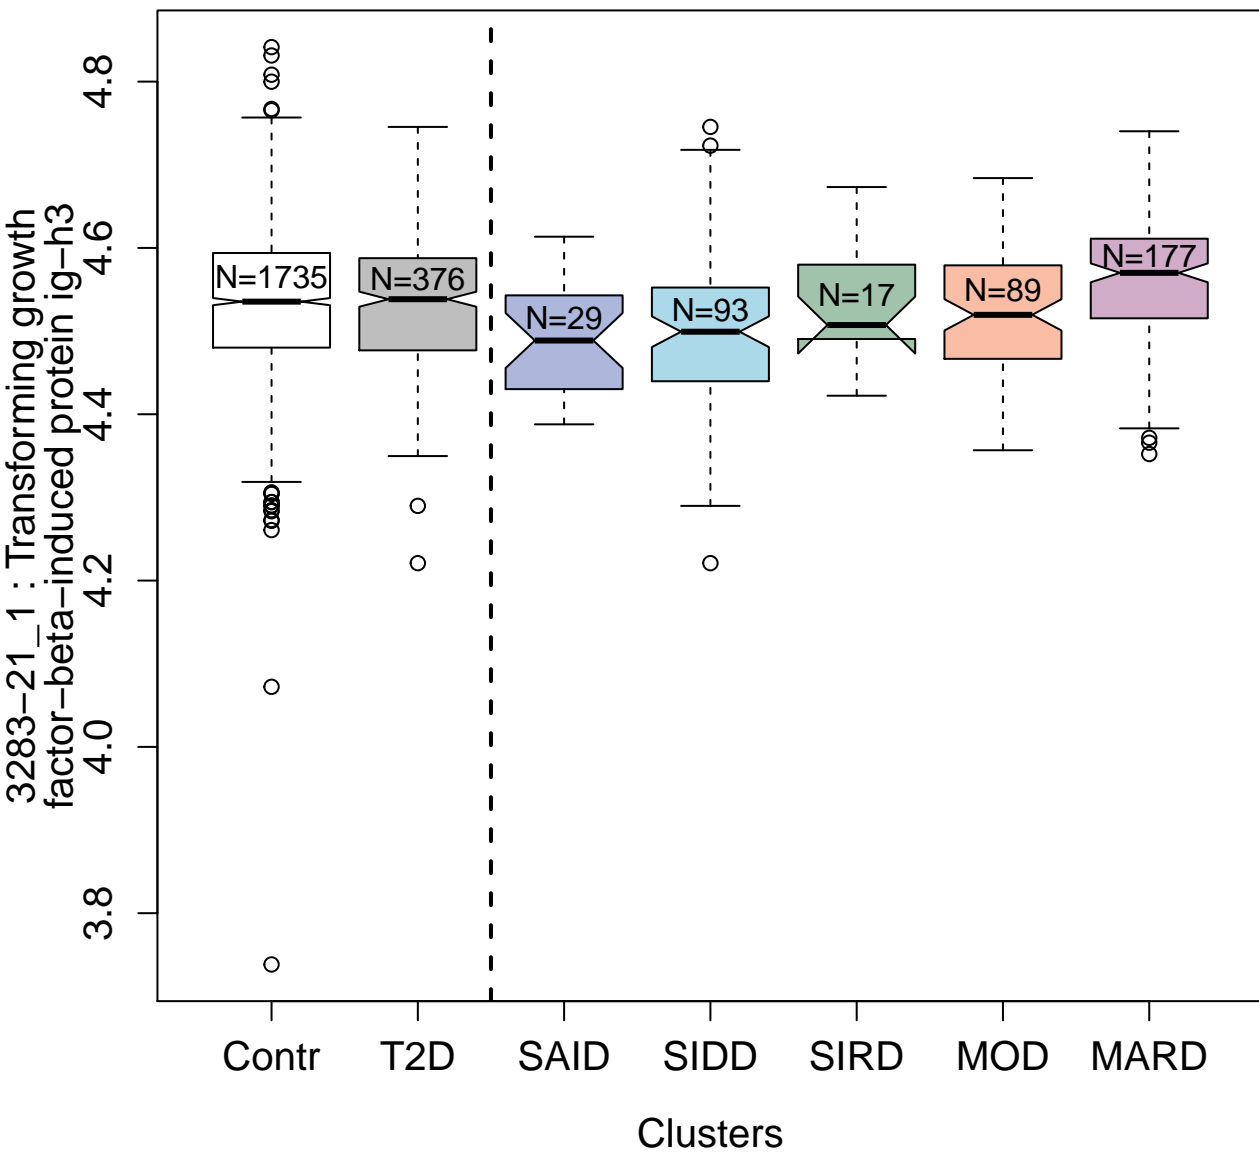

3049-61\_2 : Trypsin-1

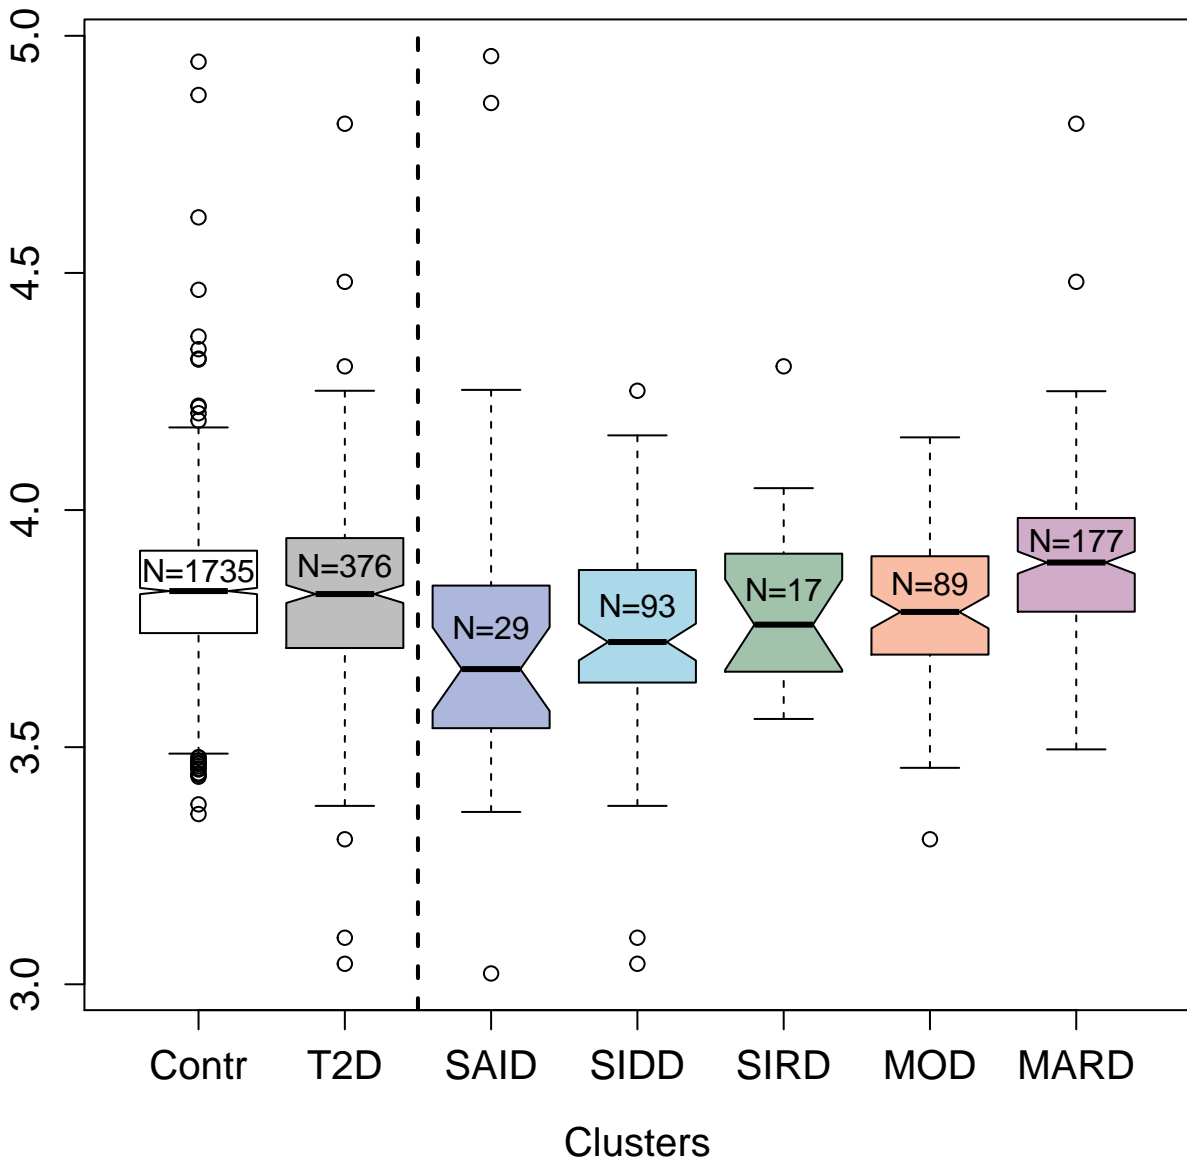

2748-3\_2 : Inhibin beta A chain

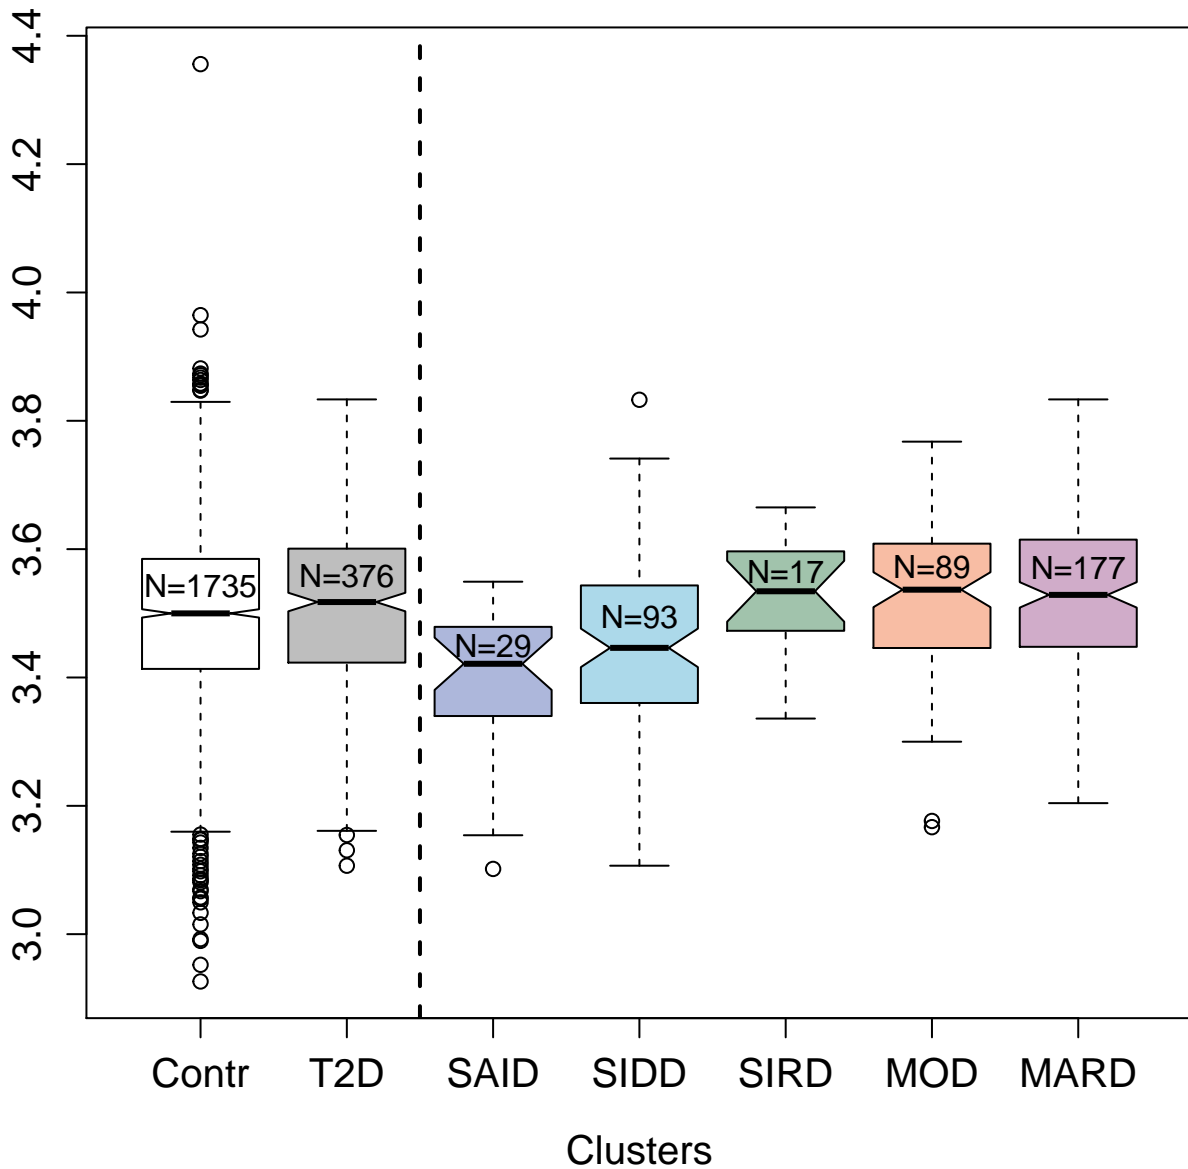

5358-3\_3 : Osteomodulin

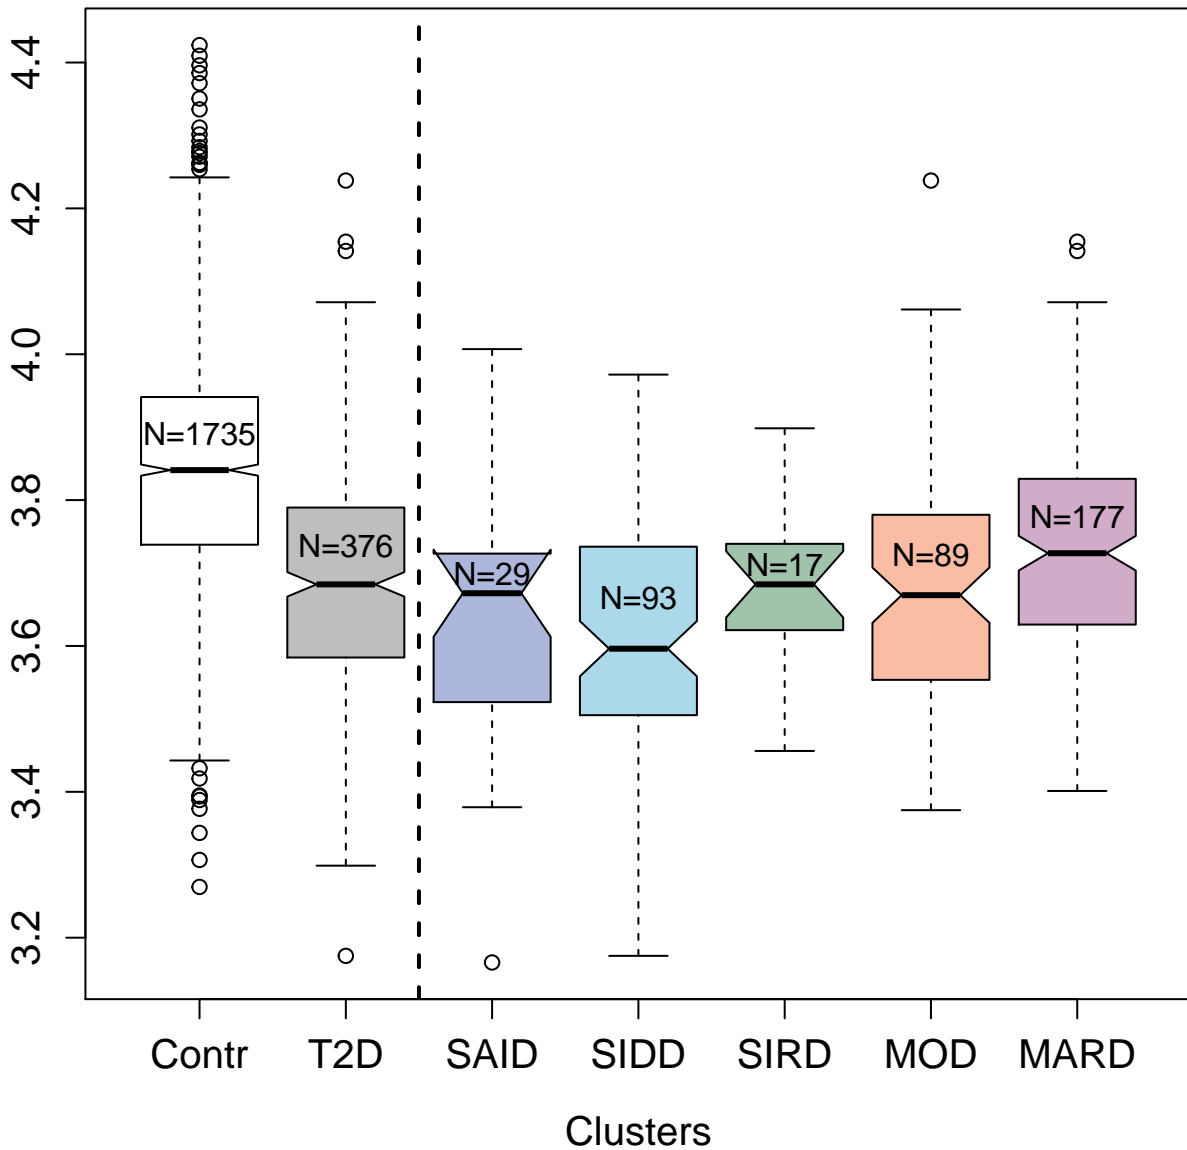

3438-10\_2 : Follistatin-related protein 3

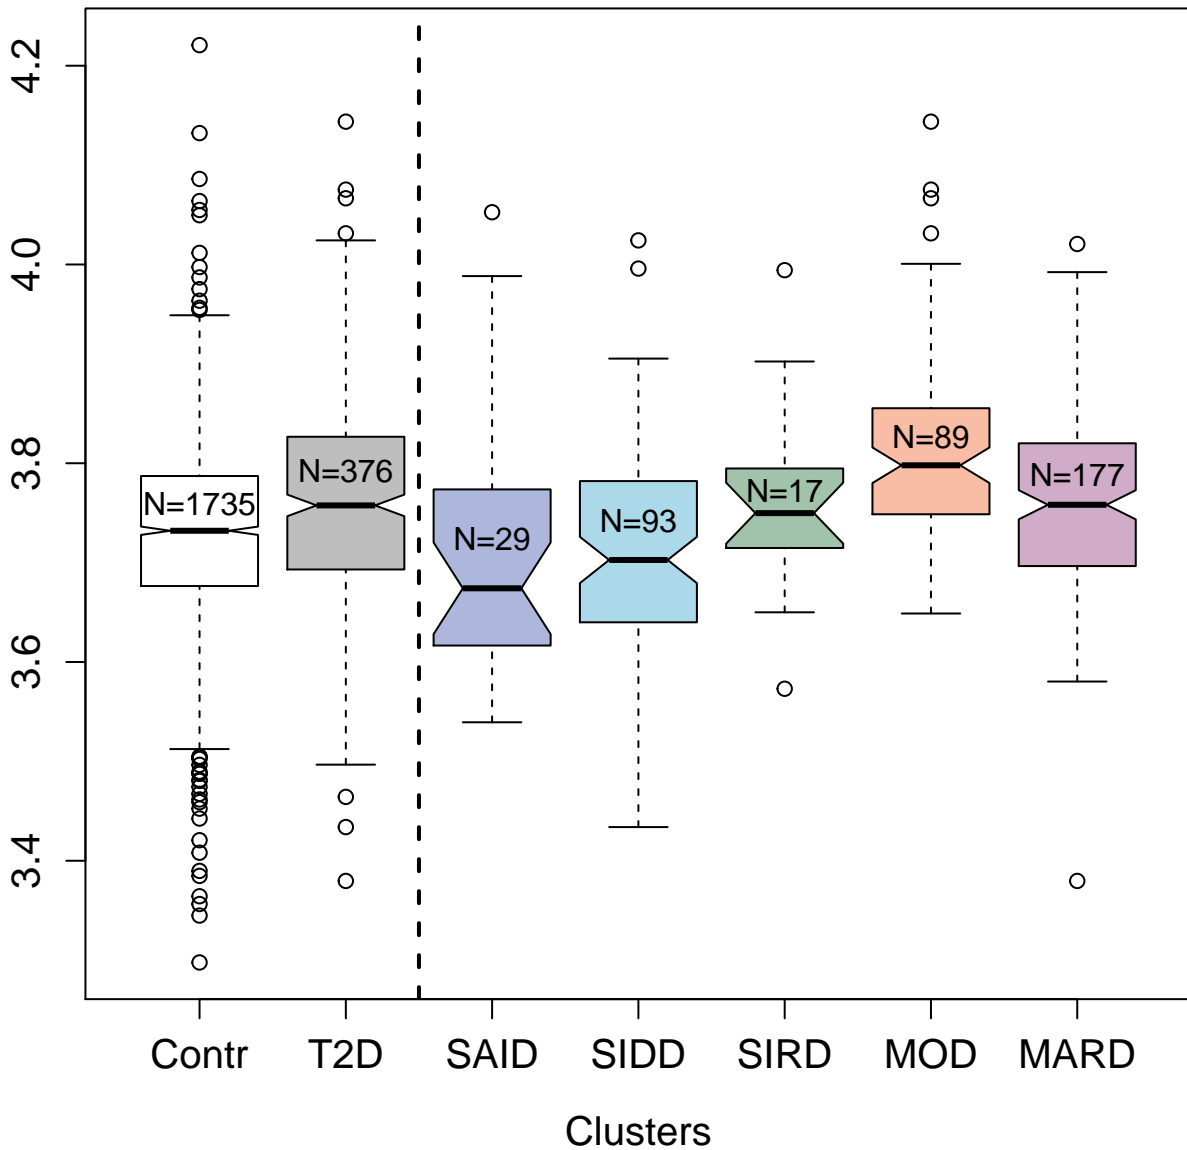

4467-49\_2 : SPARC-like protein 1

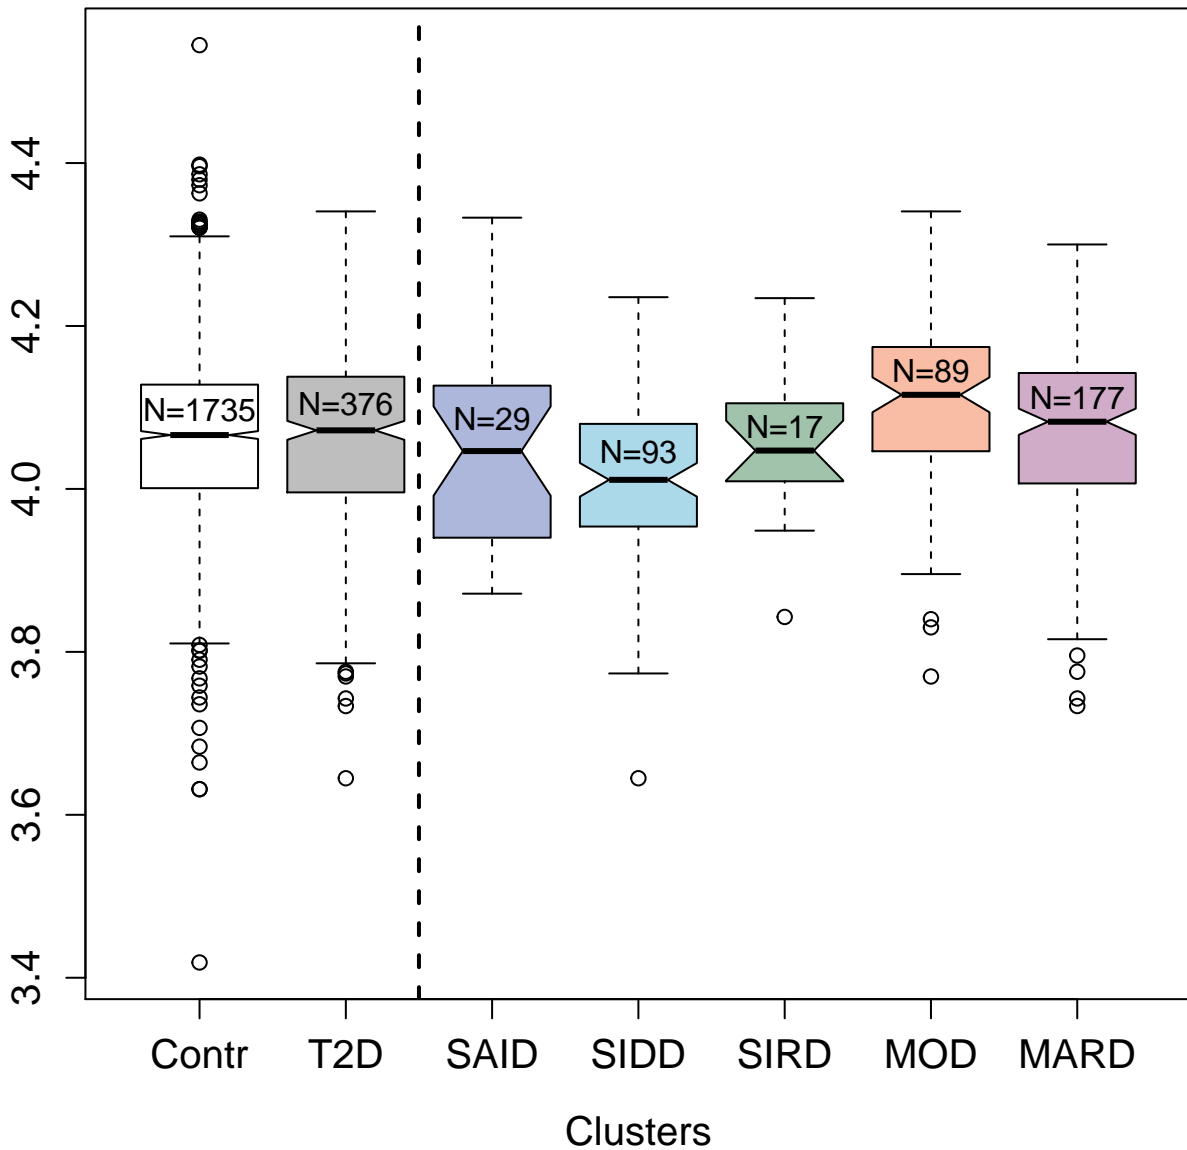

4568-17\_2 : SLIT and NTRK-like protein 5

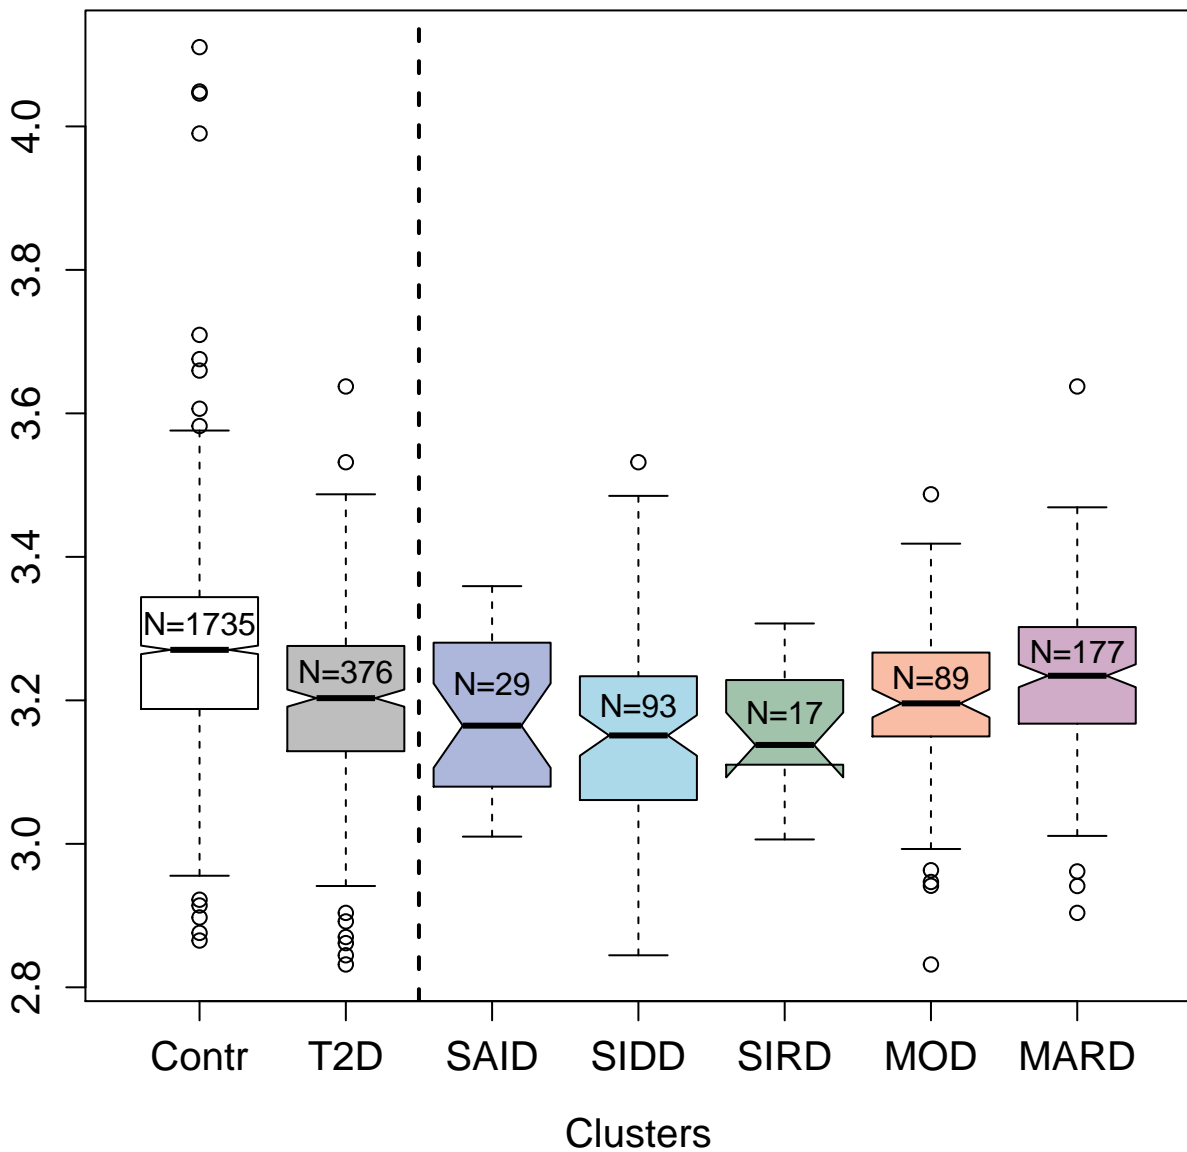

3042-7\_2 : Myoglobin

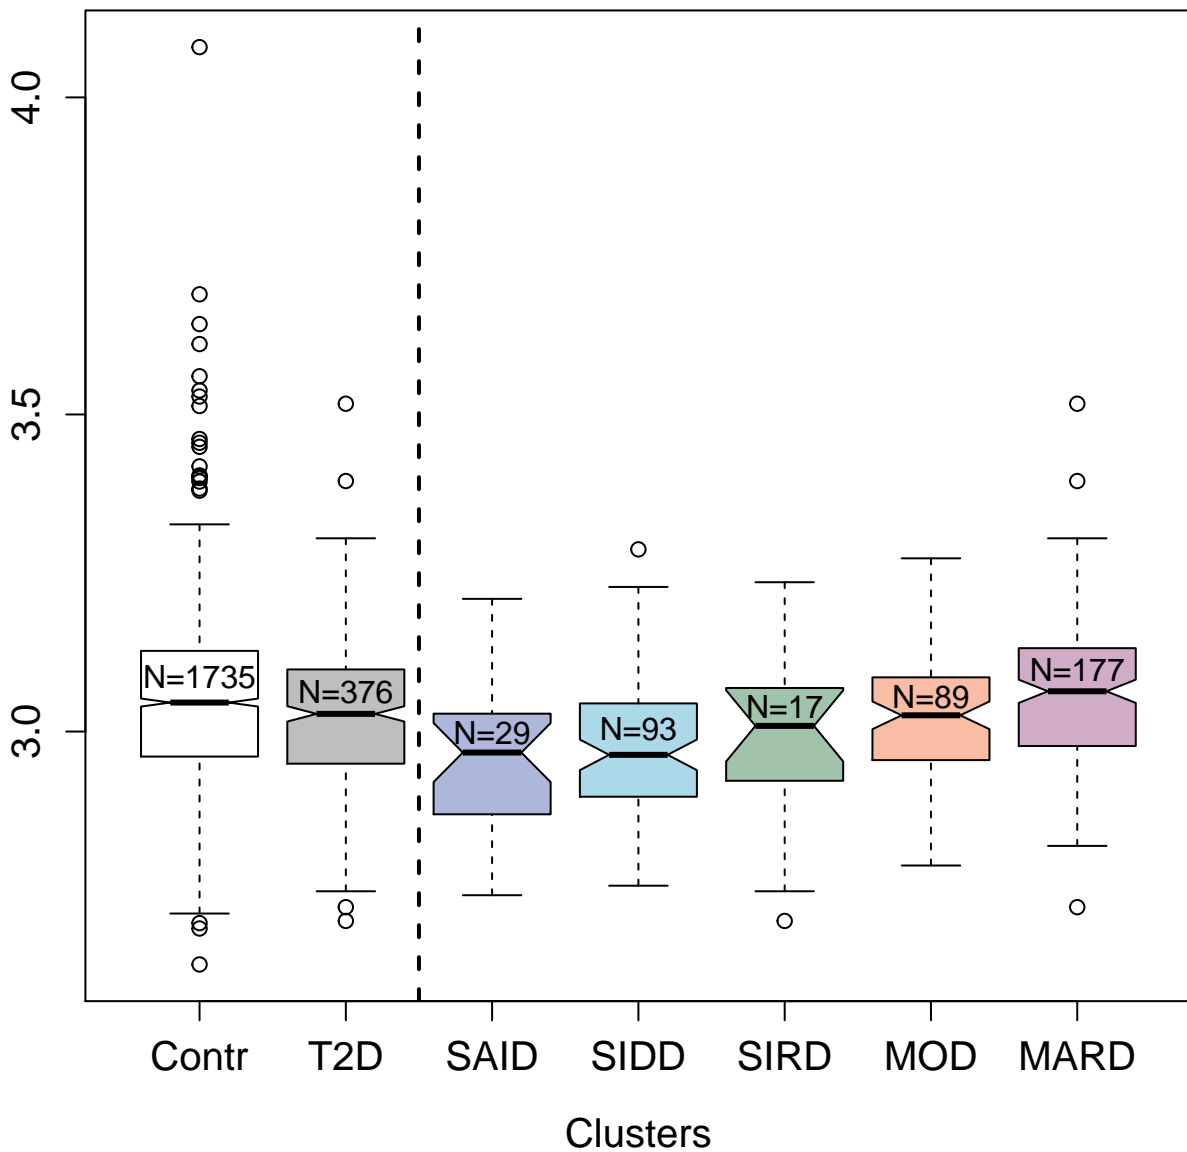



4775-34\_3 : Gelsolin

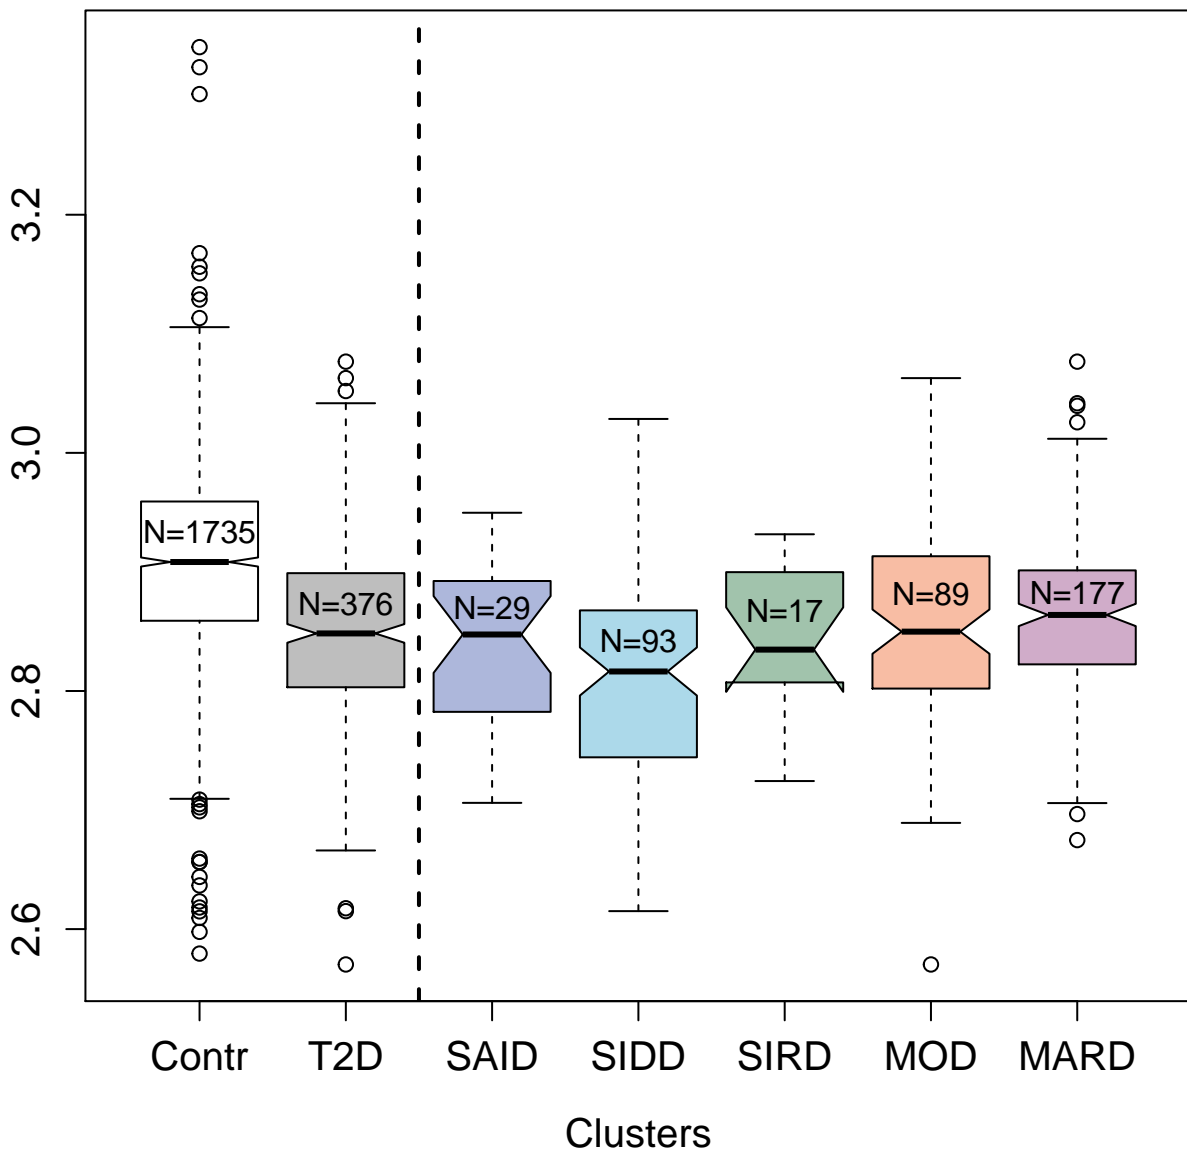

5115-31\_3 : Tumor necrosis factor receptor  
superfamily member 19L

3.0 3.2 3.4 3.6 3.8

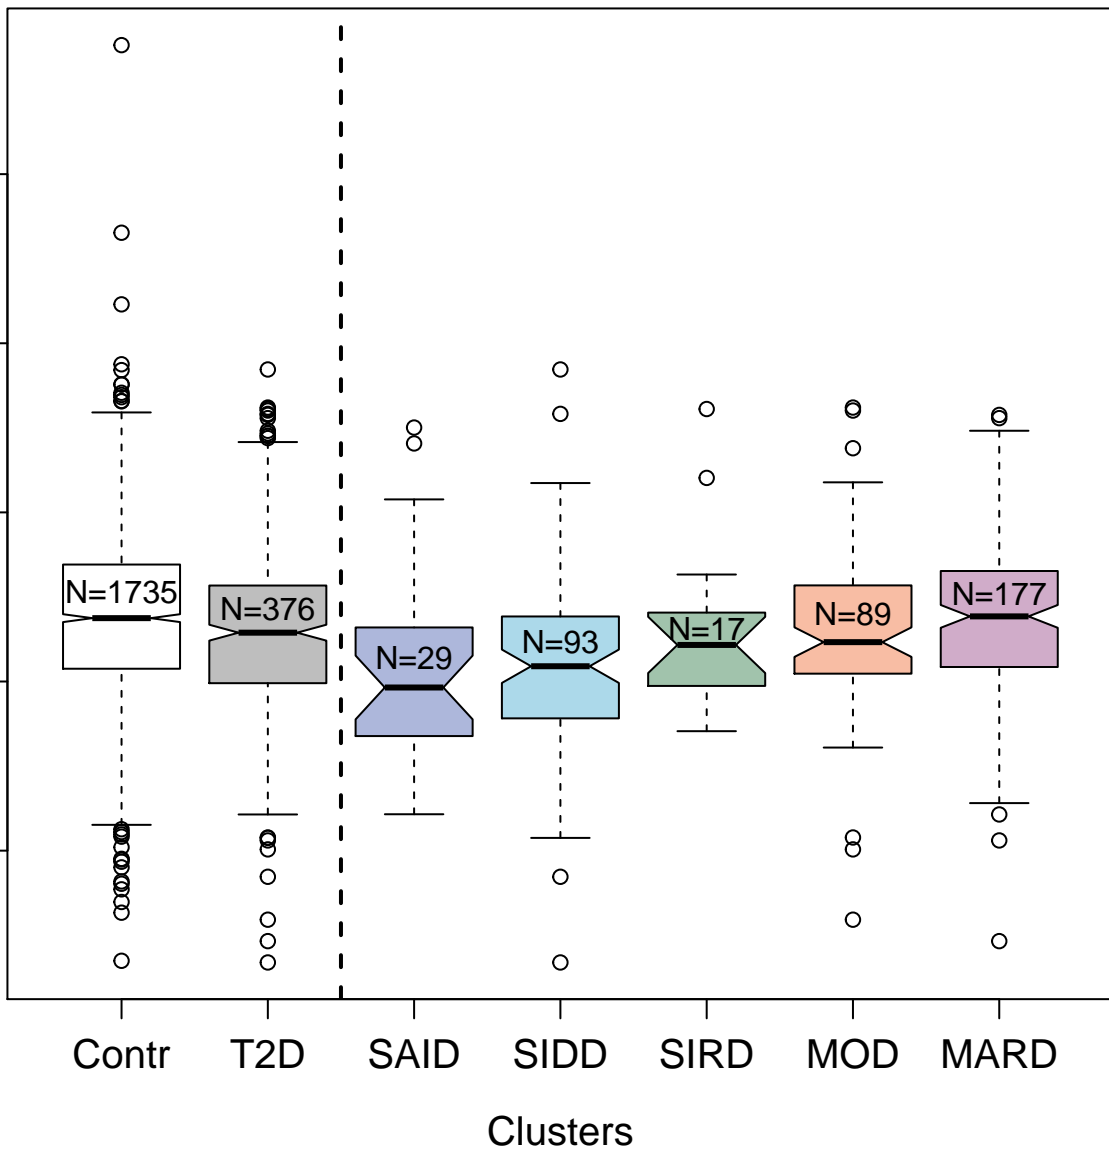

2201-17\_6 : Endostatin

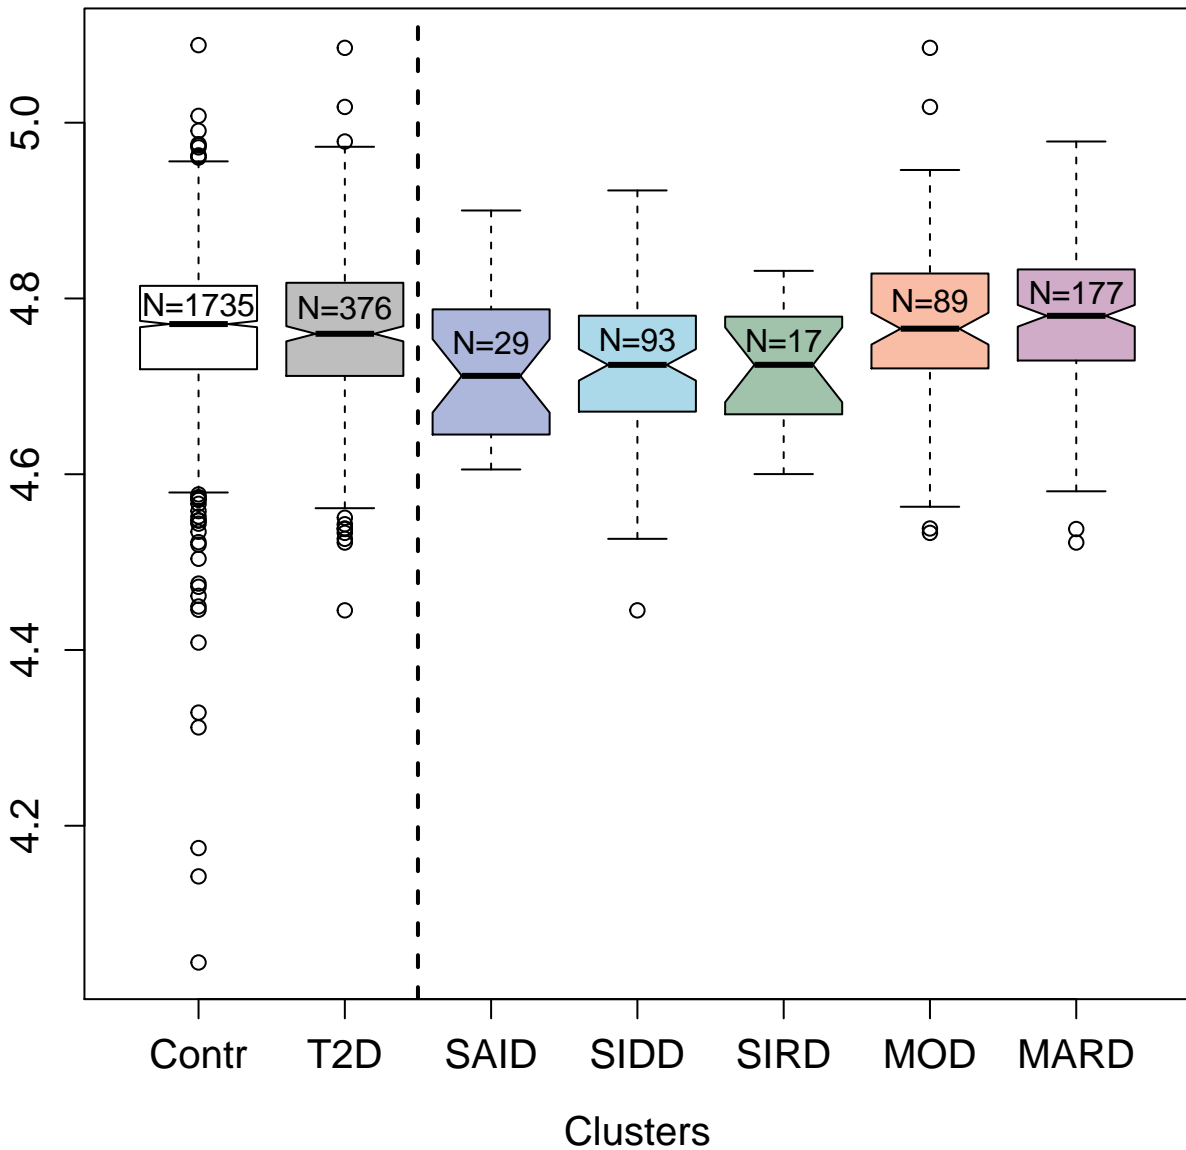

5121-3\_2 : Semaphorin-6B

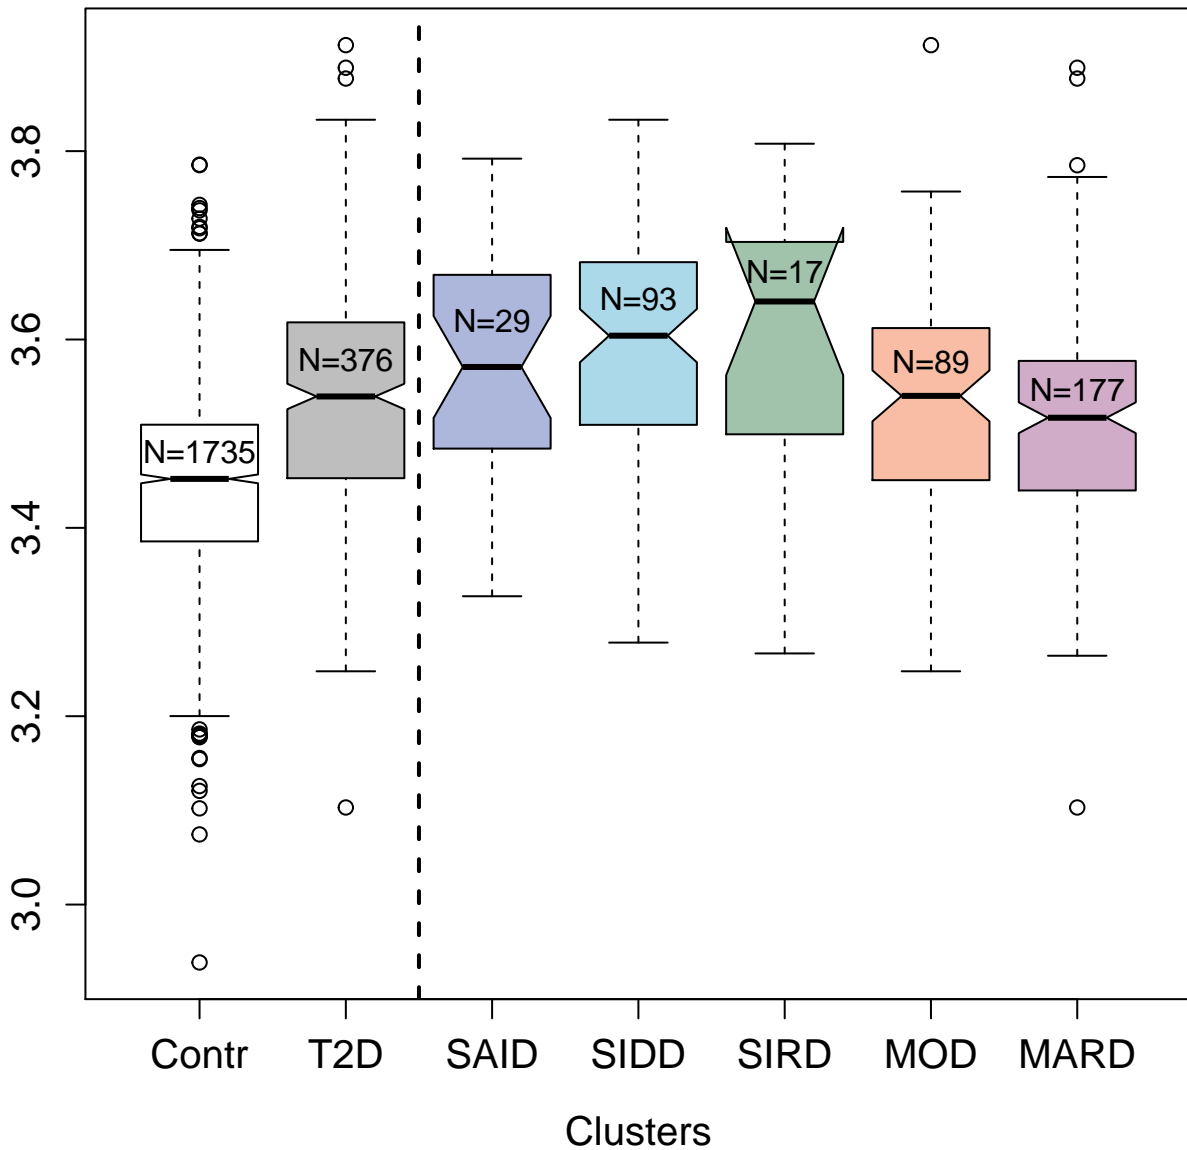

3435-53\_2 : Fibronectin Fragment 4

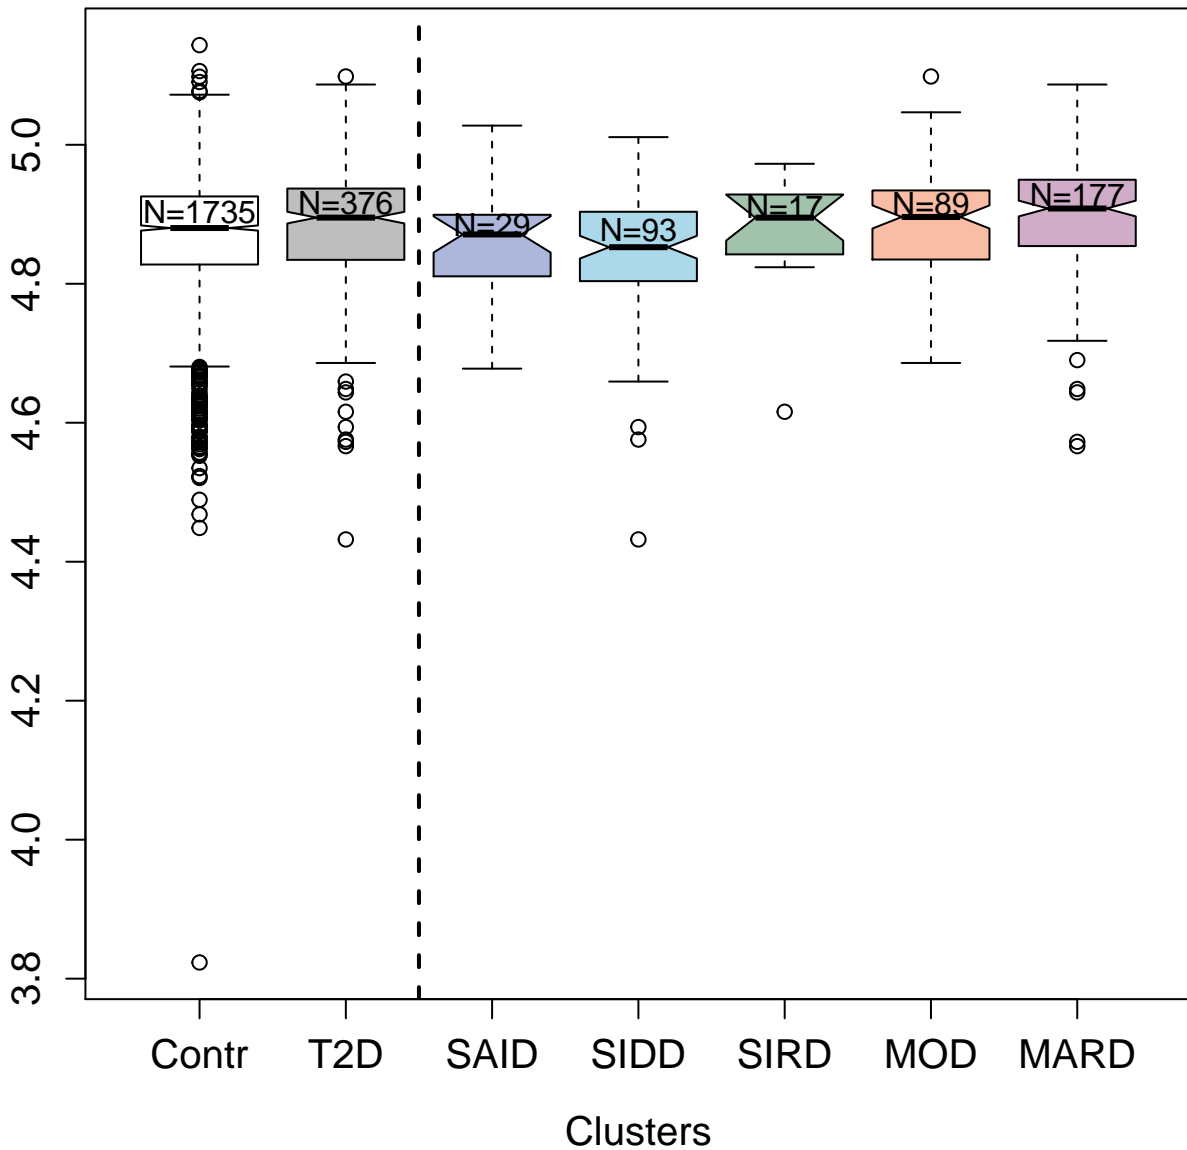

2728-62\_2 : Laminin

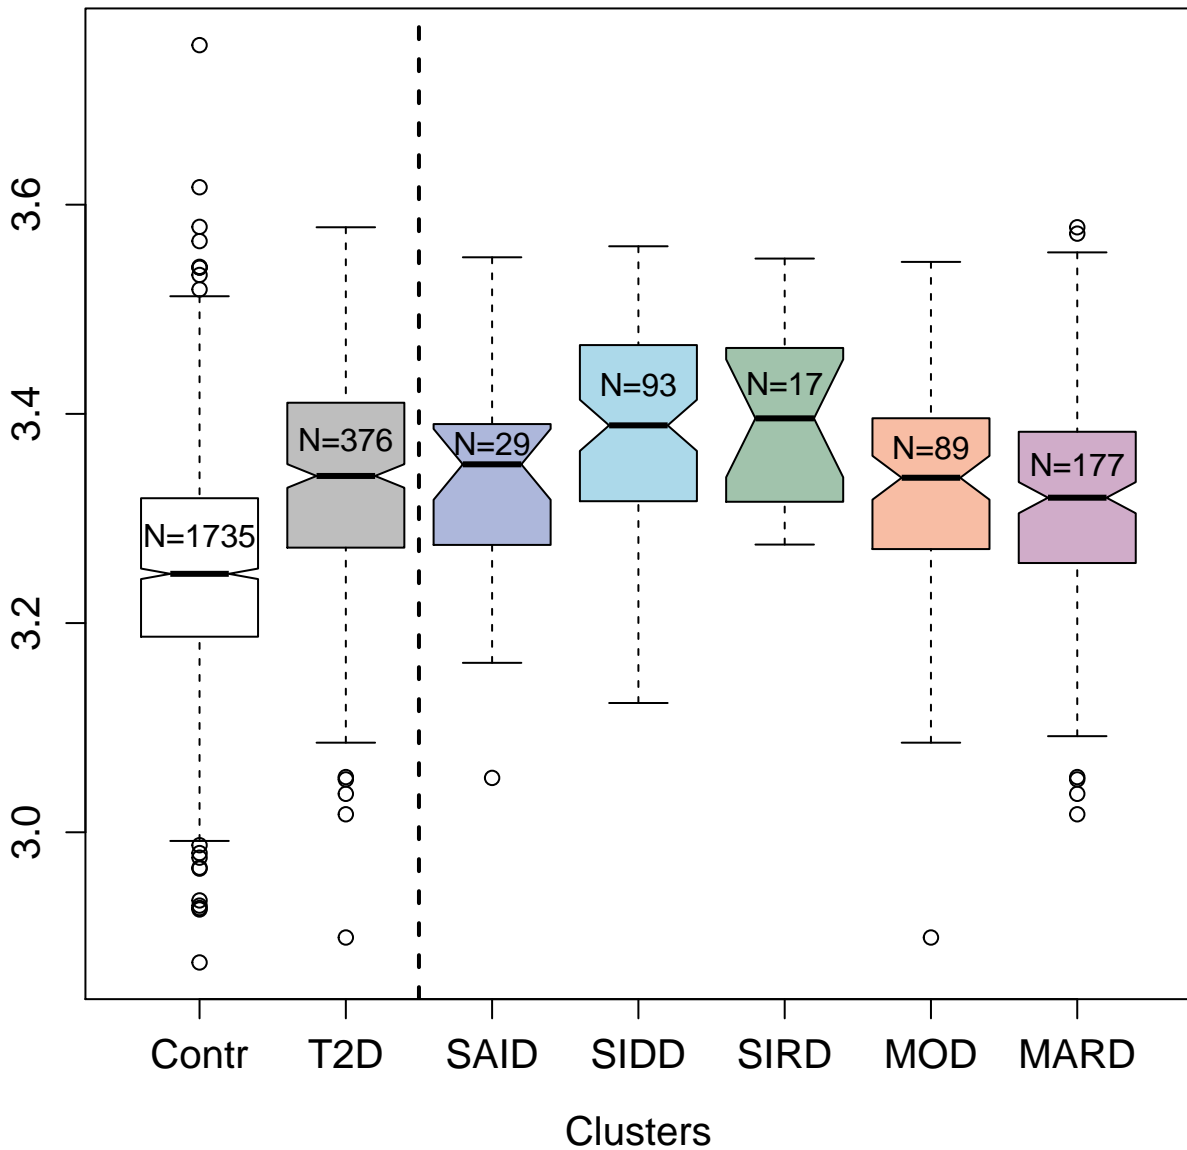

5109-24\_3 : Neuronal cell adhesion molecule

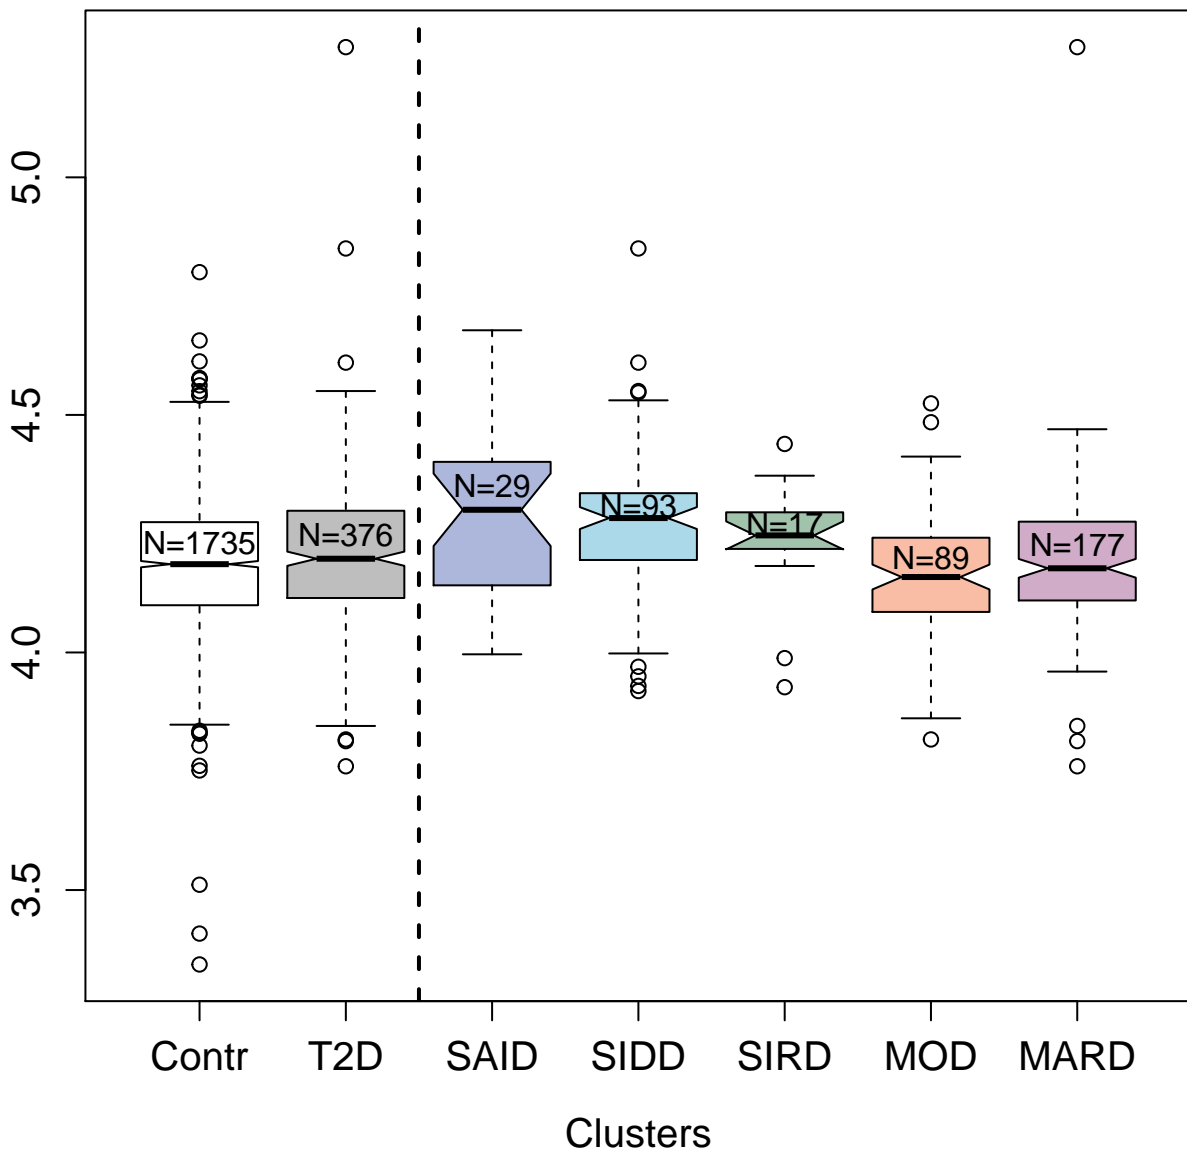

5508-62\_3 : Cathepsin D

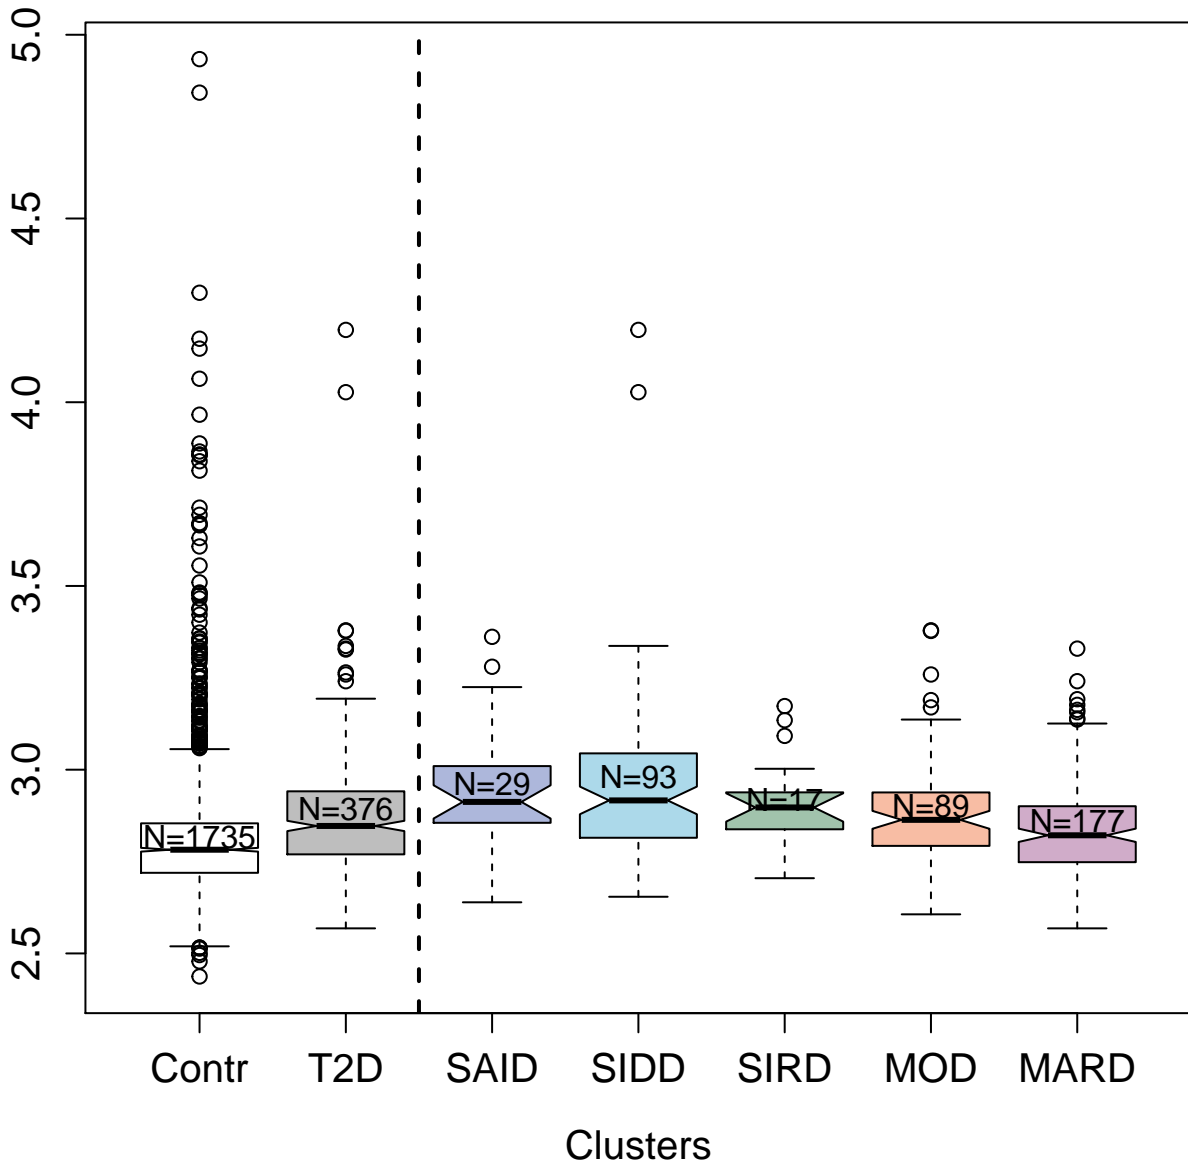



3303-23\_2 : Cystatin-M

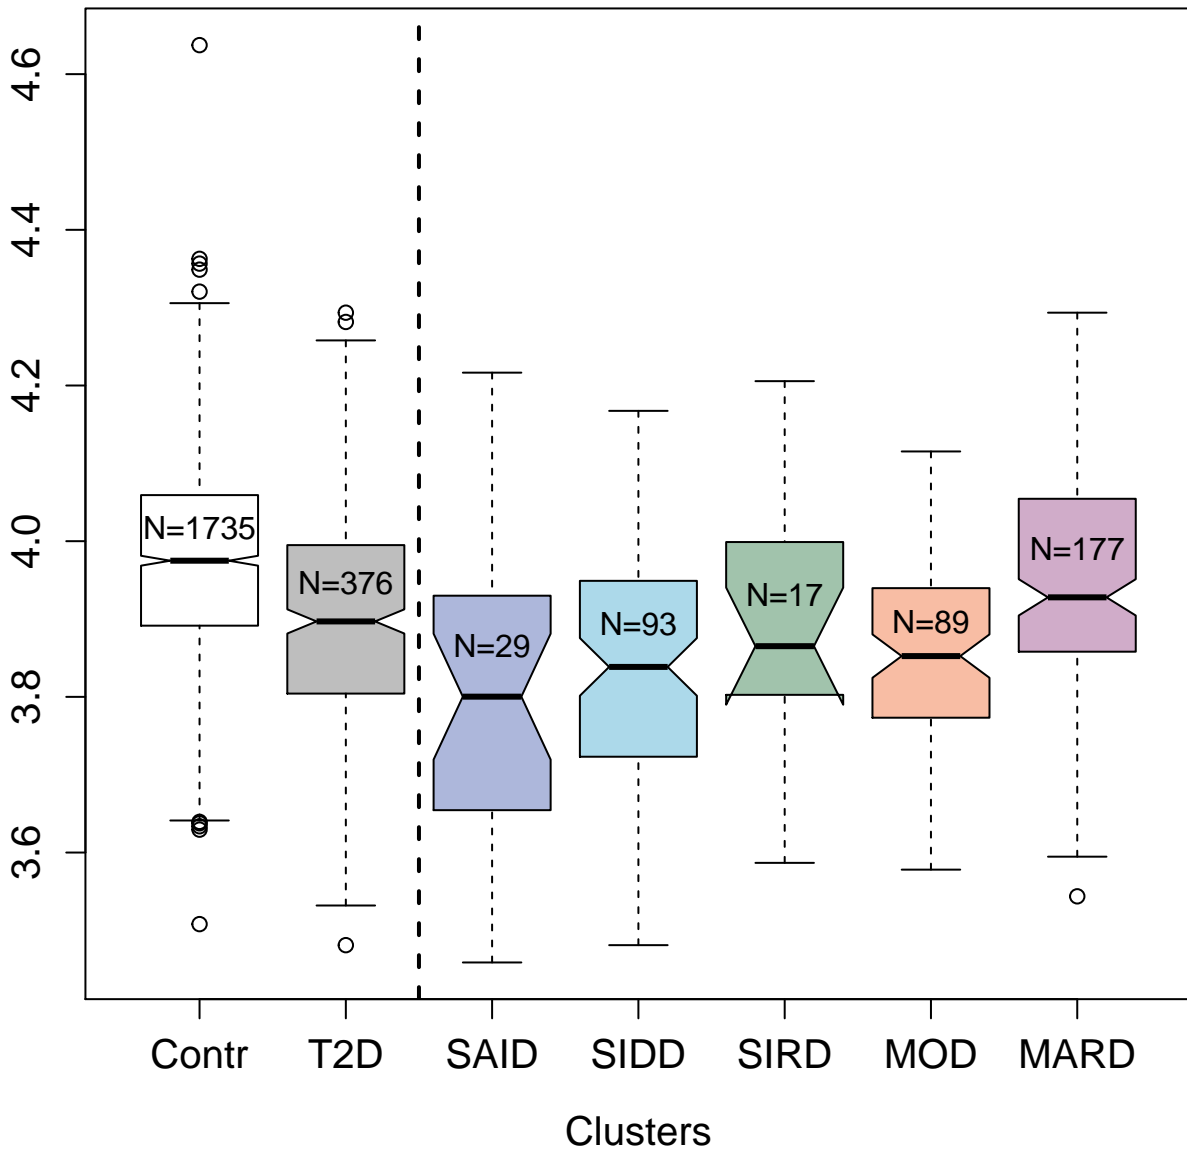

3431-54\_2 : Ephrin type-A receptor 1

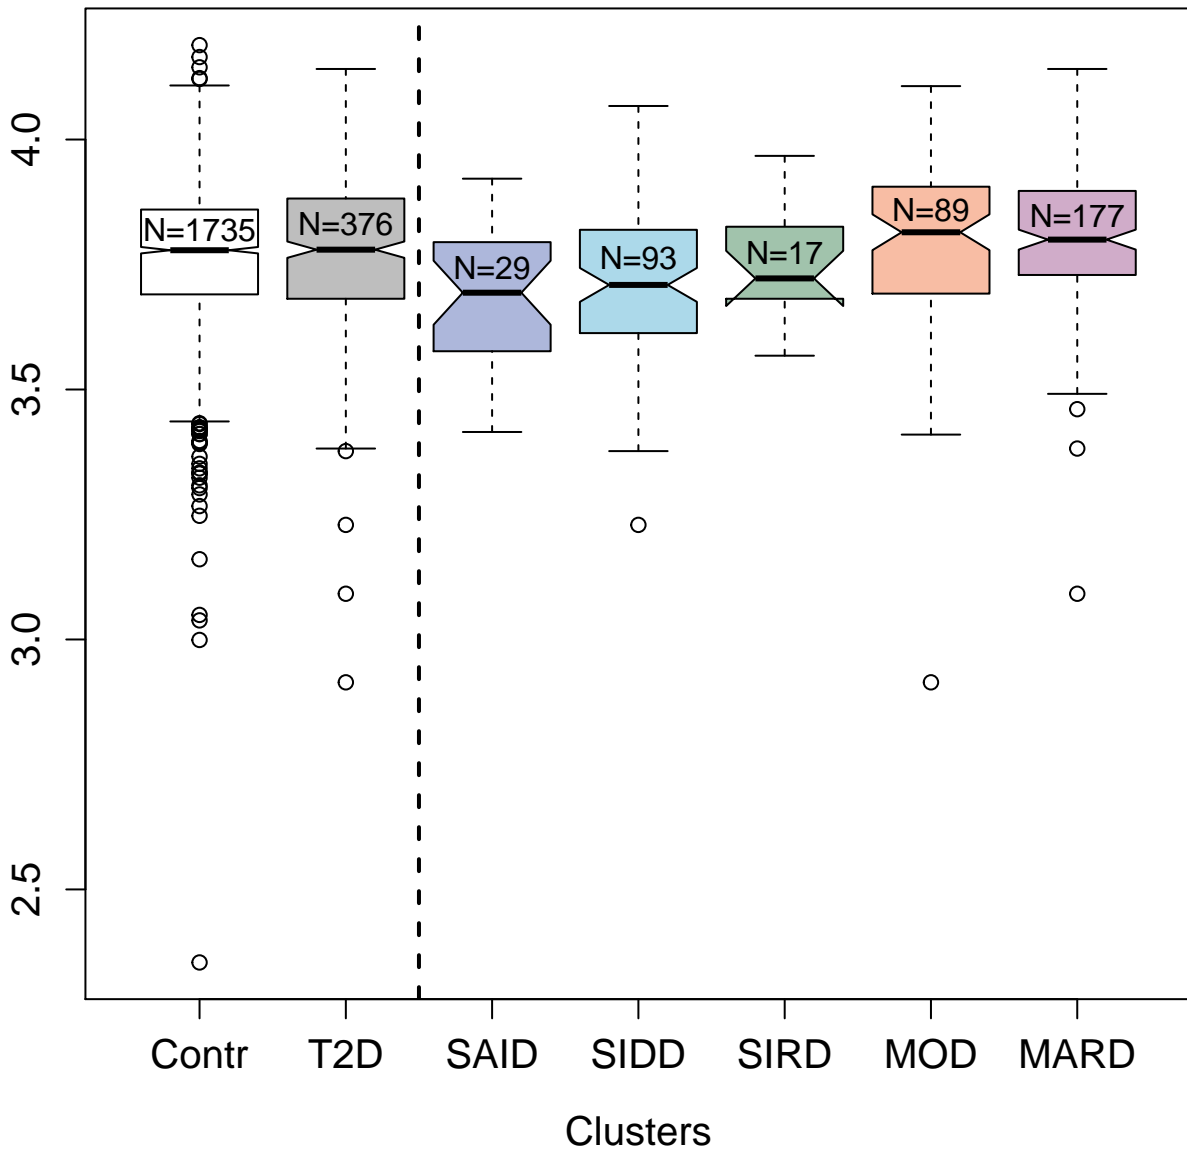

2834-54\_1 : Kallikrein-8

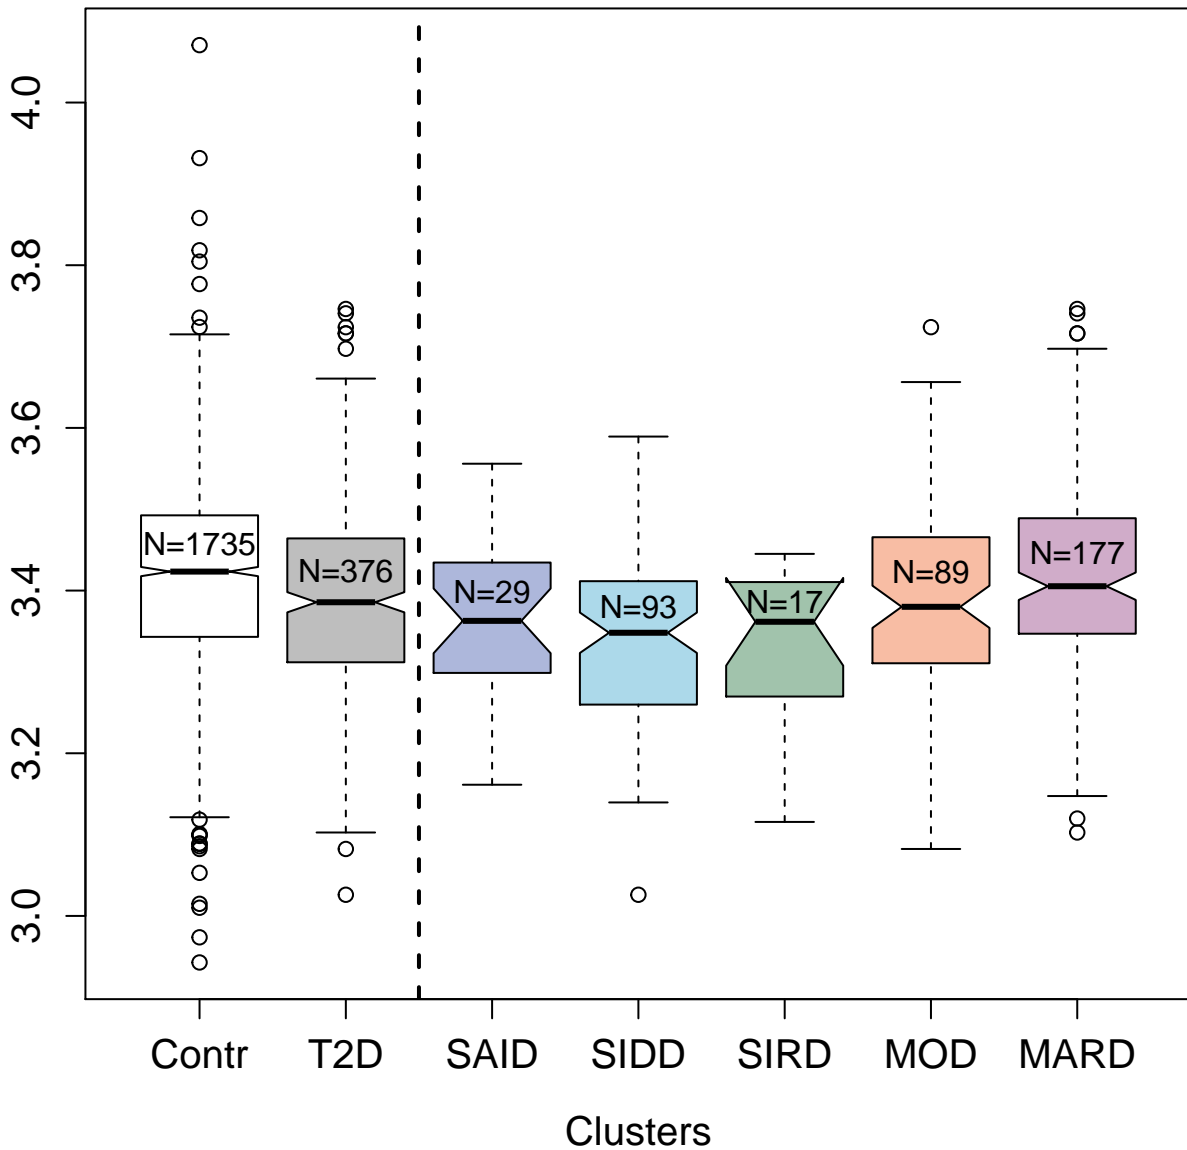

5122-92\_2 : Semaphorin-6A

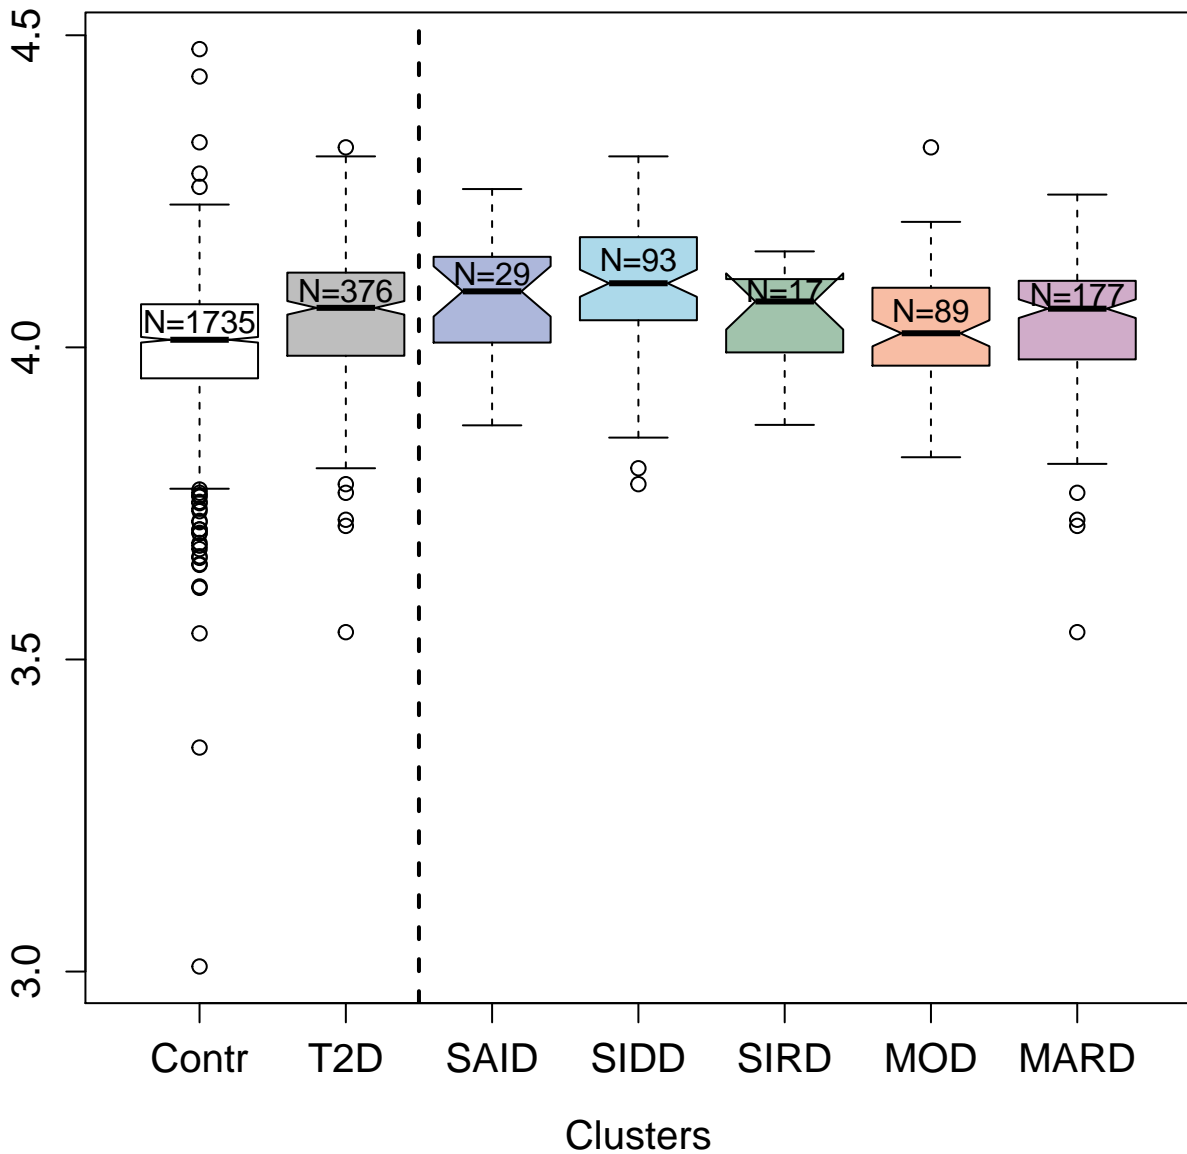

3516-60\_2 : Stromal cell-derived factor 1

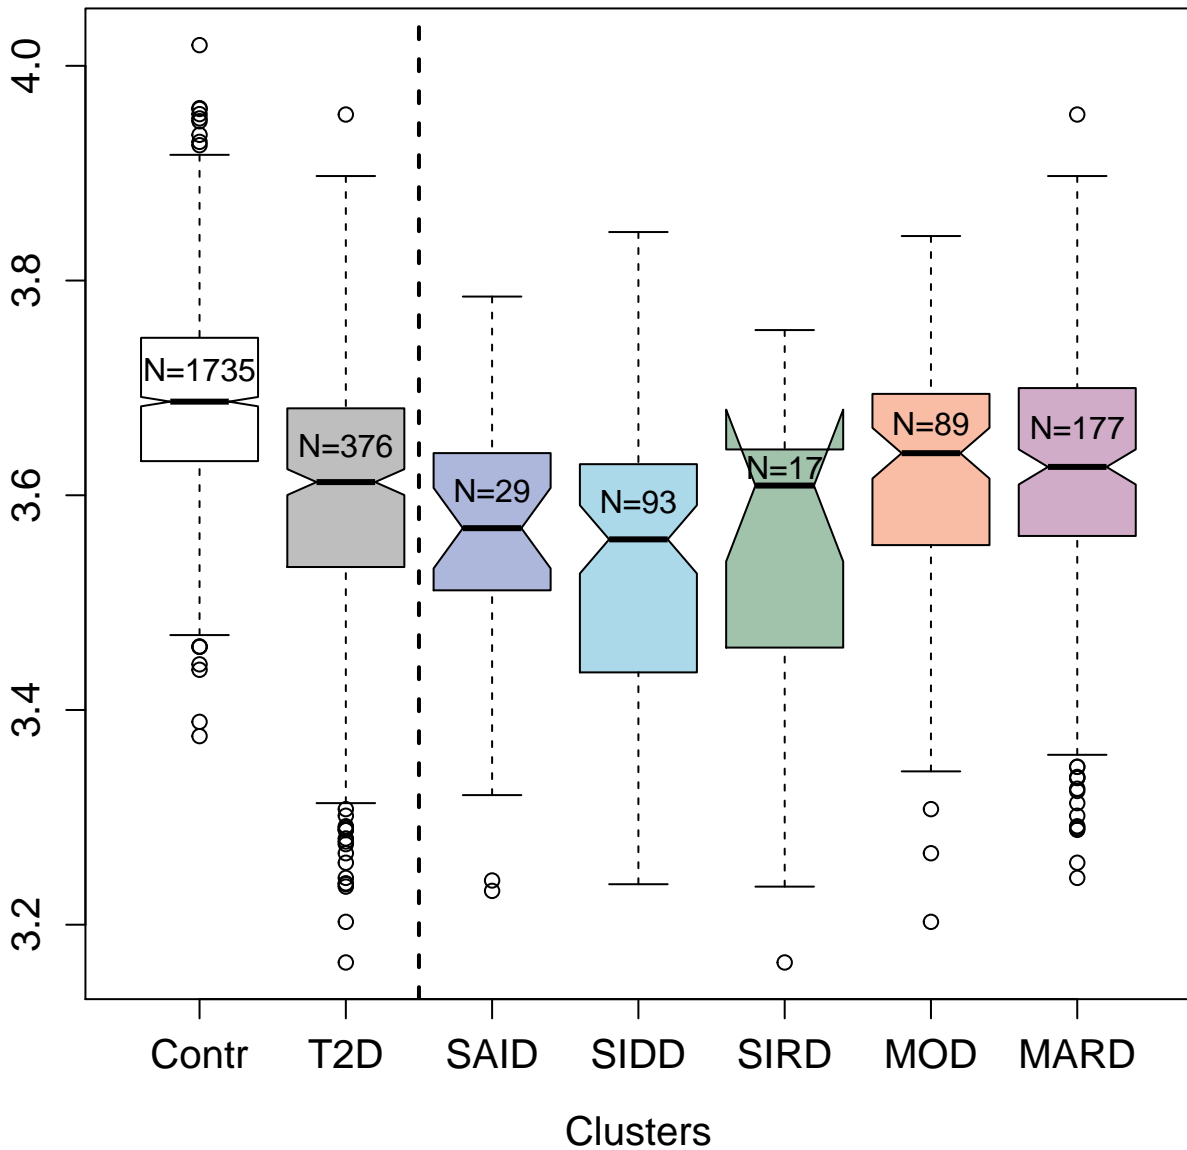

4152-58\_2 : Plasma kallikrein

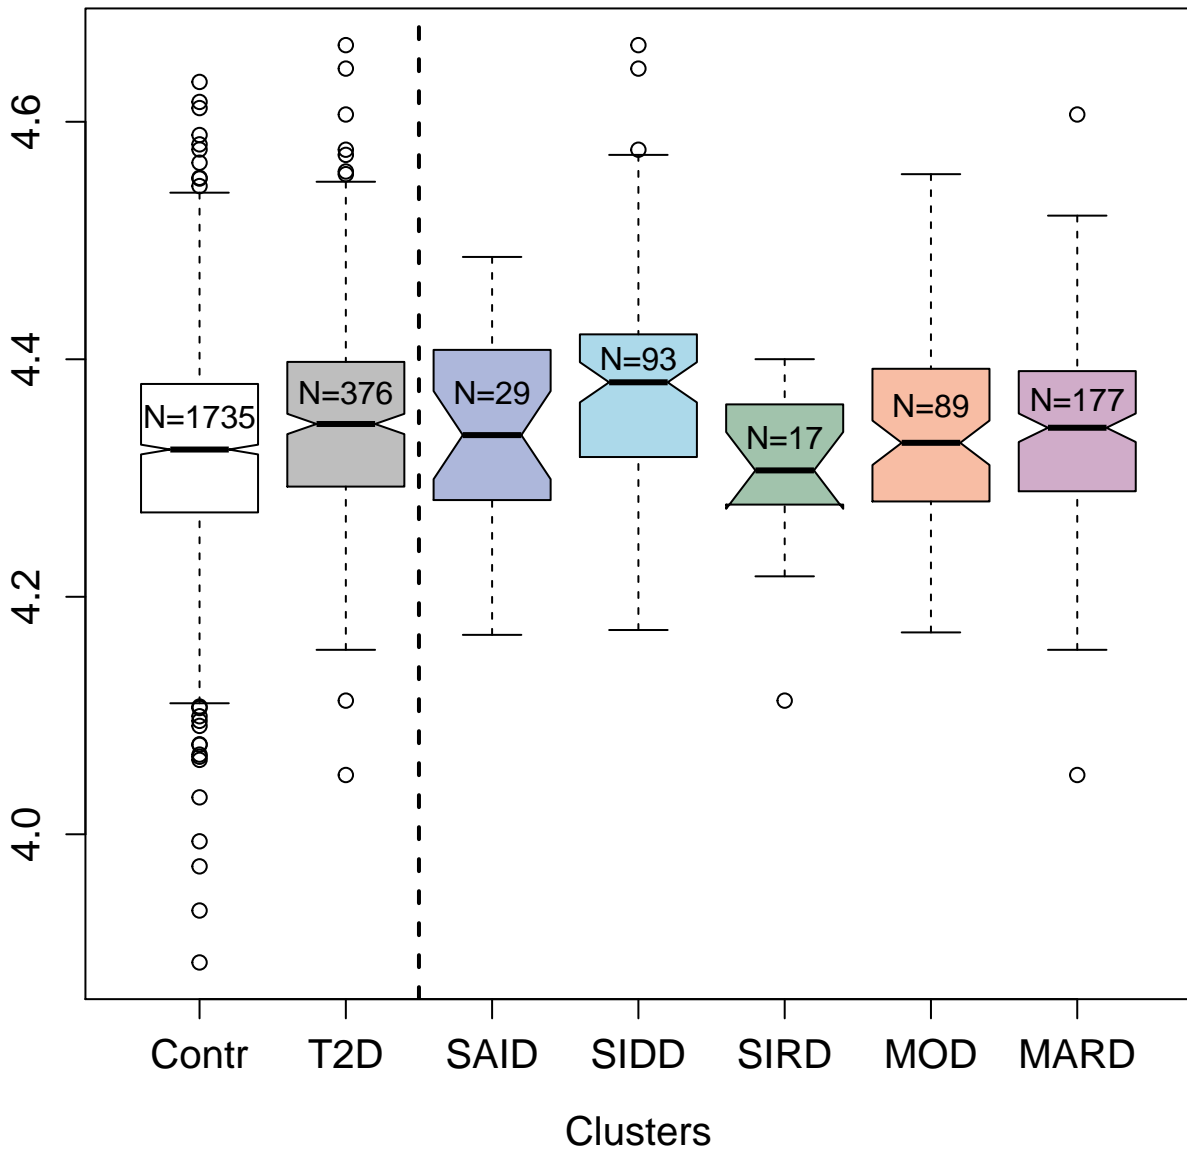

3470-1\_2 : E-selectin

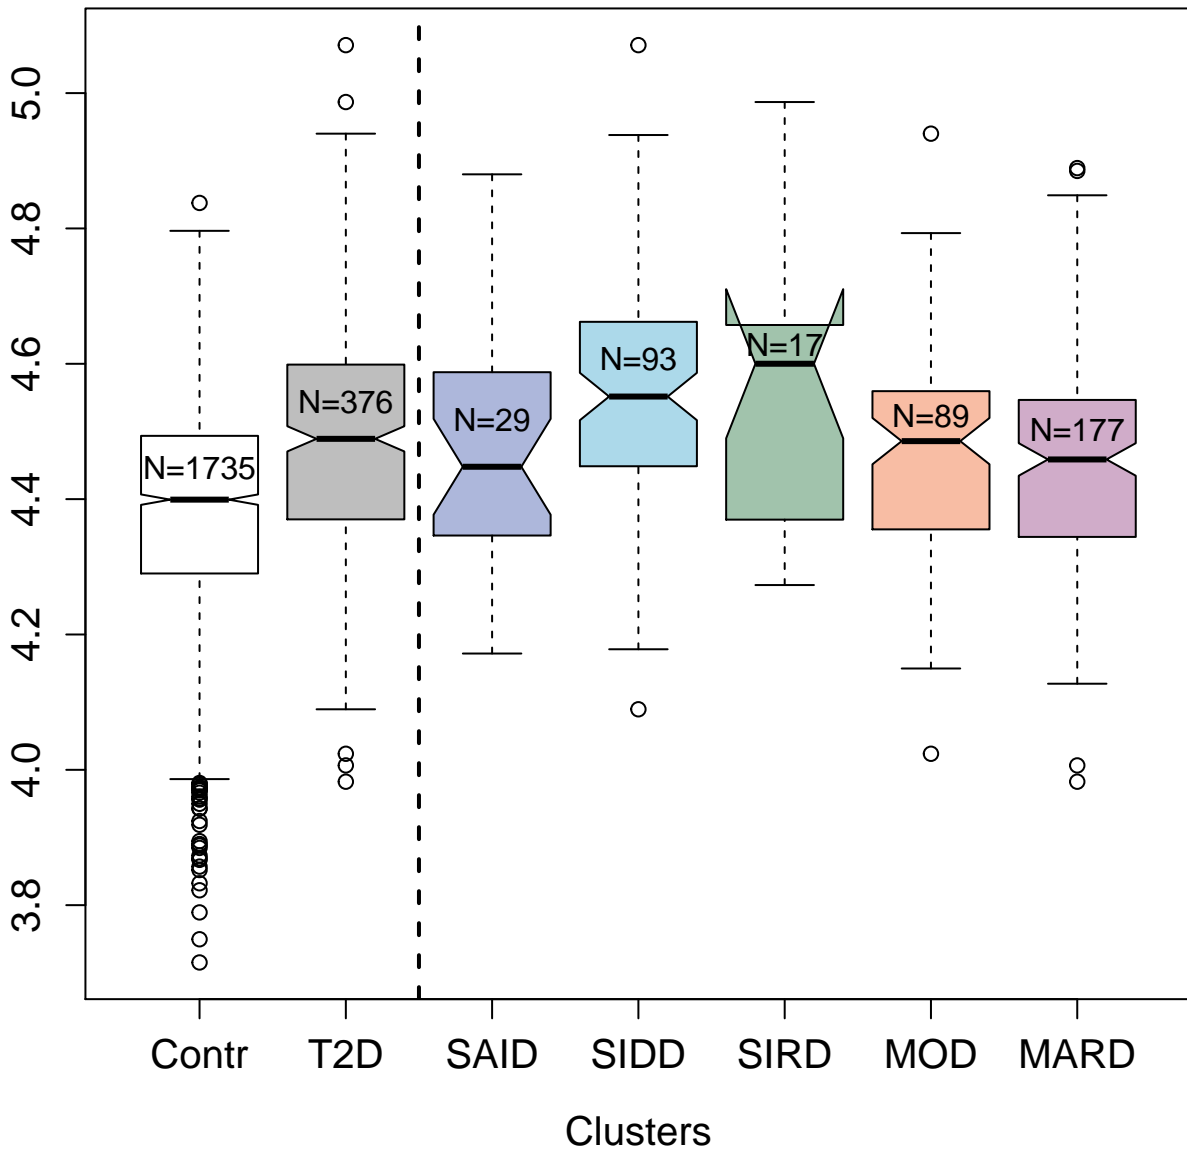

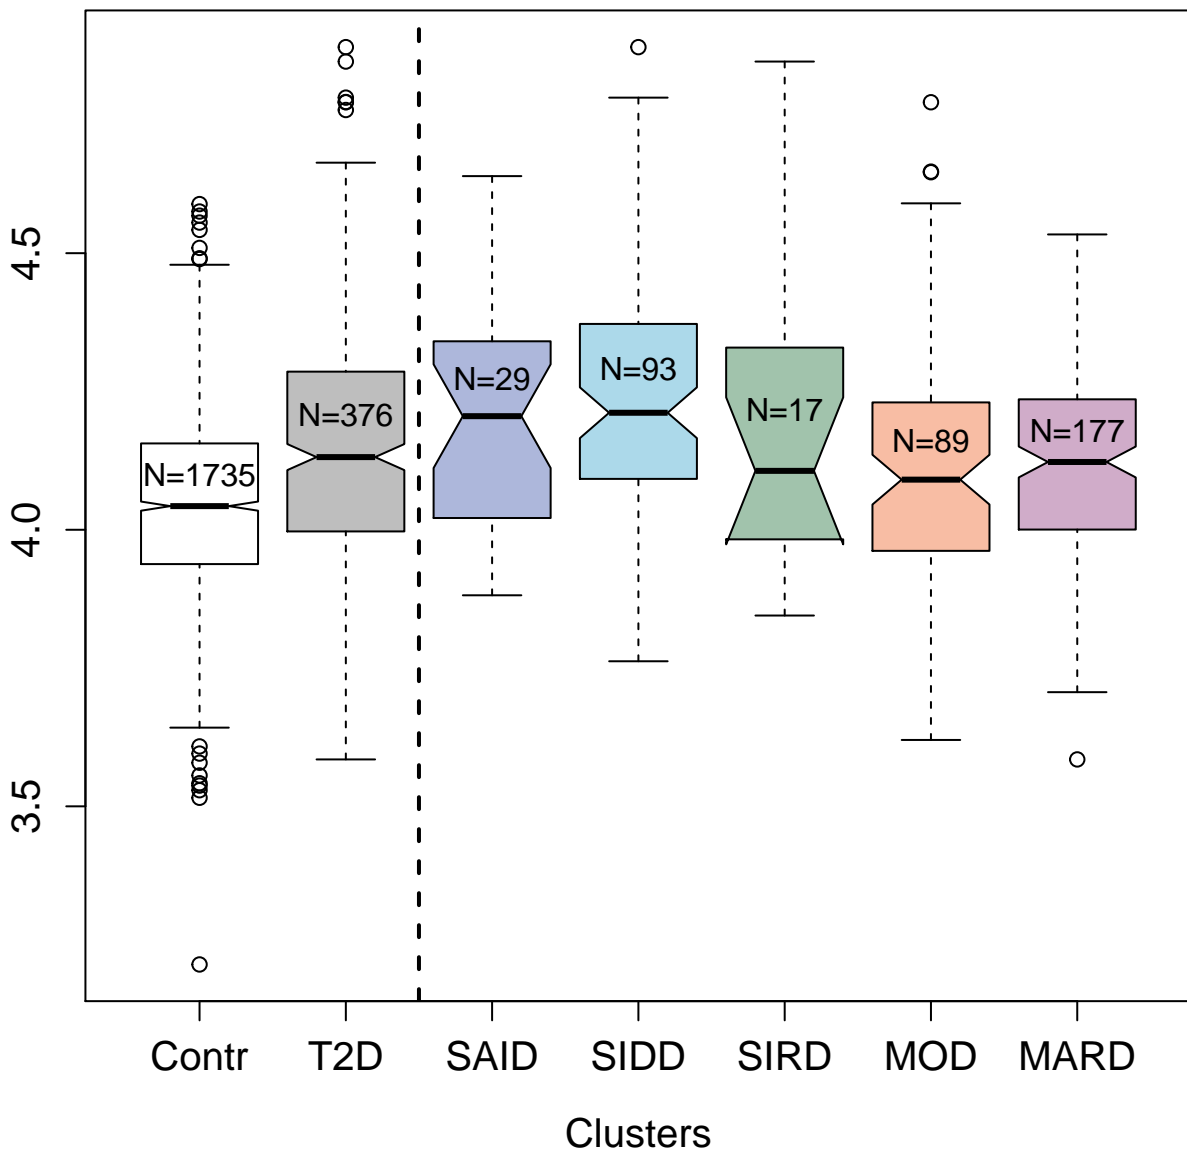



4962-52\_1 : Cerebral dopamine neurotrophic factor

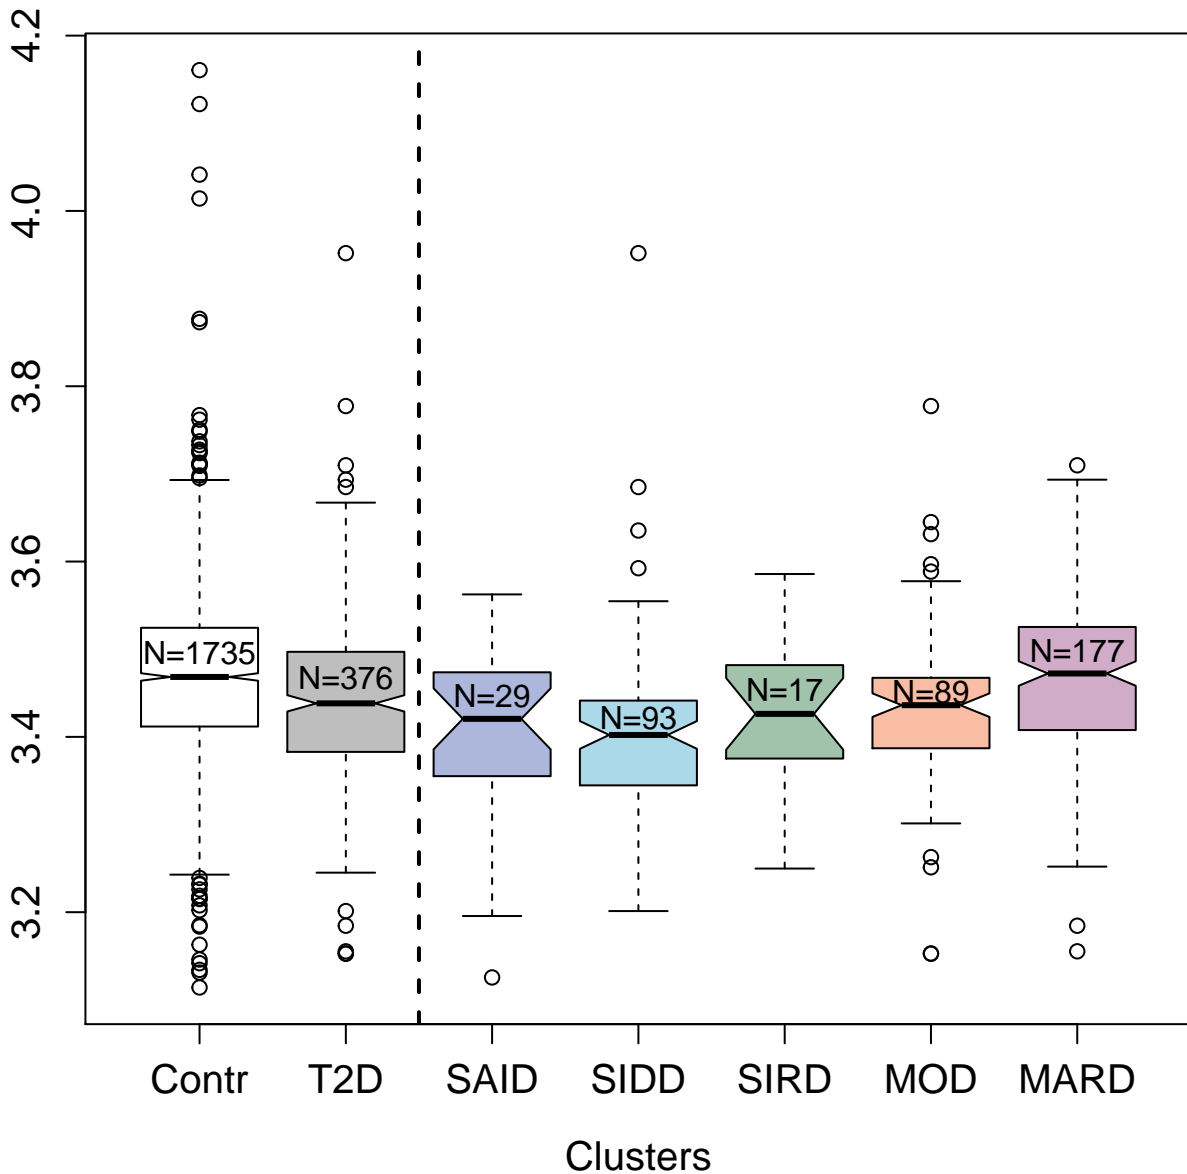

2190-55\_1 : Coagulation Factor XI

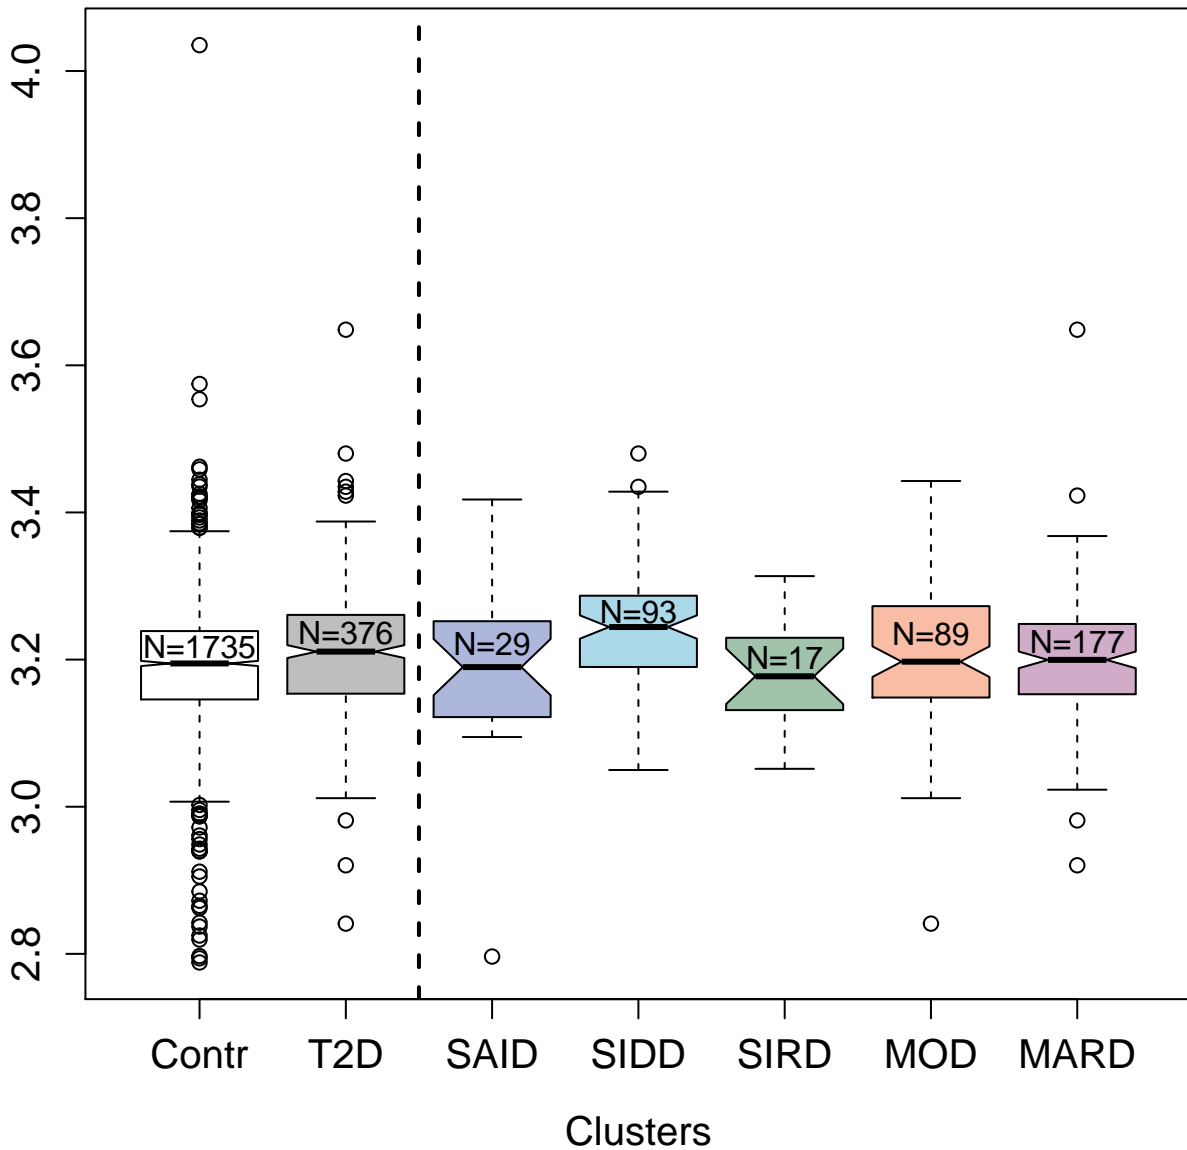

13126-52\_3 : Desmocollin-2

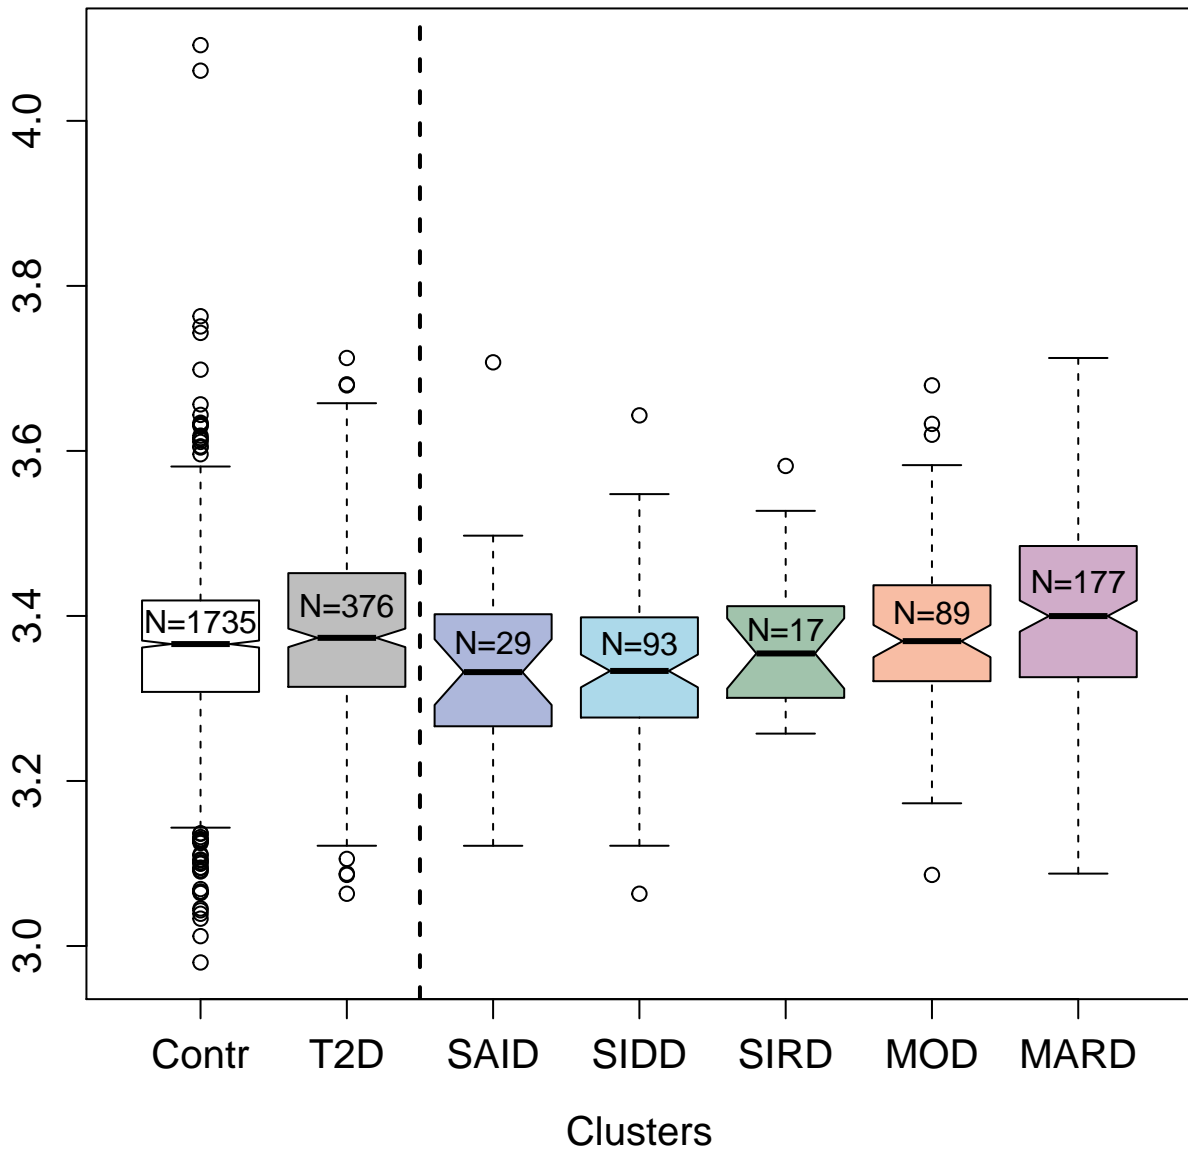

3212-30\_3 : Neutral ceramidase

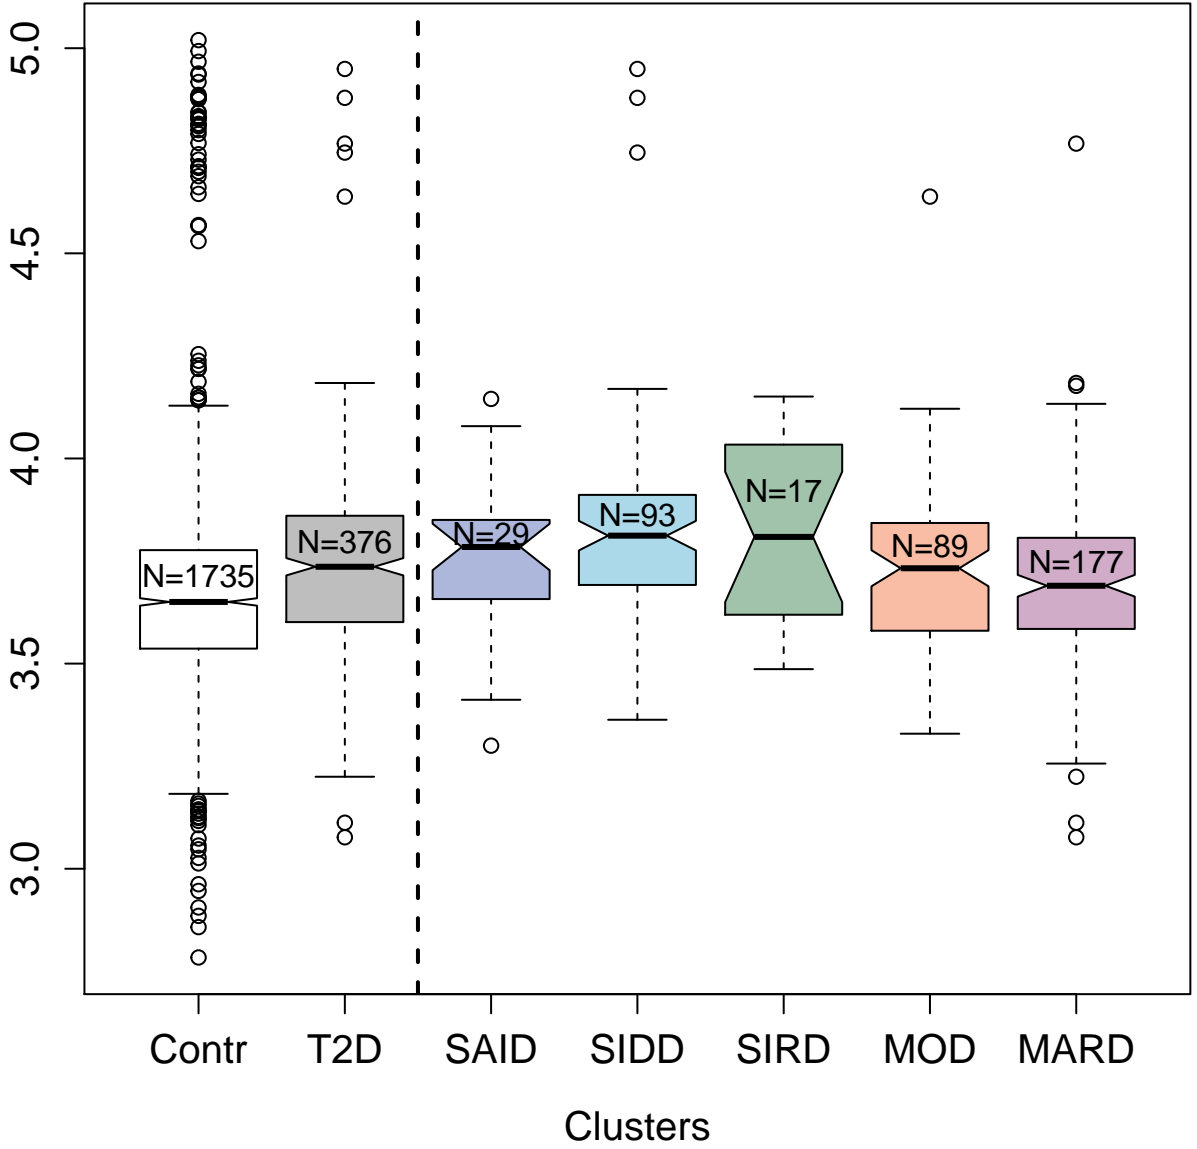

131113-7\_3 : Osteopontin

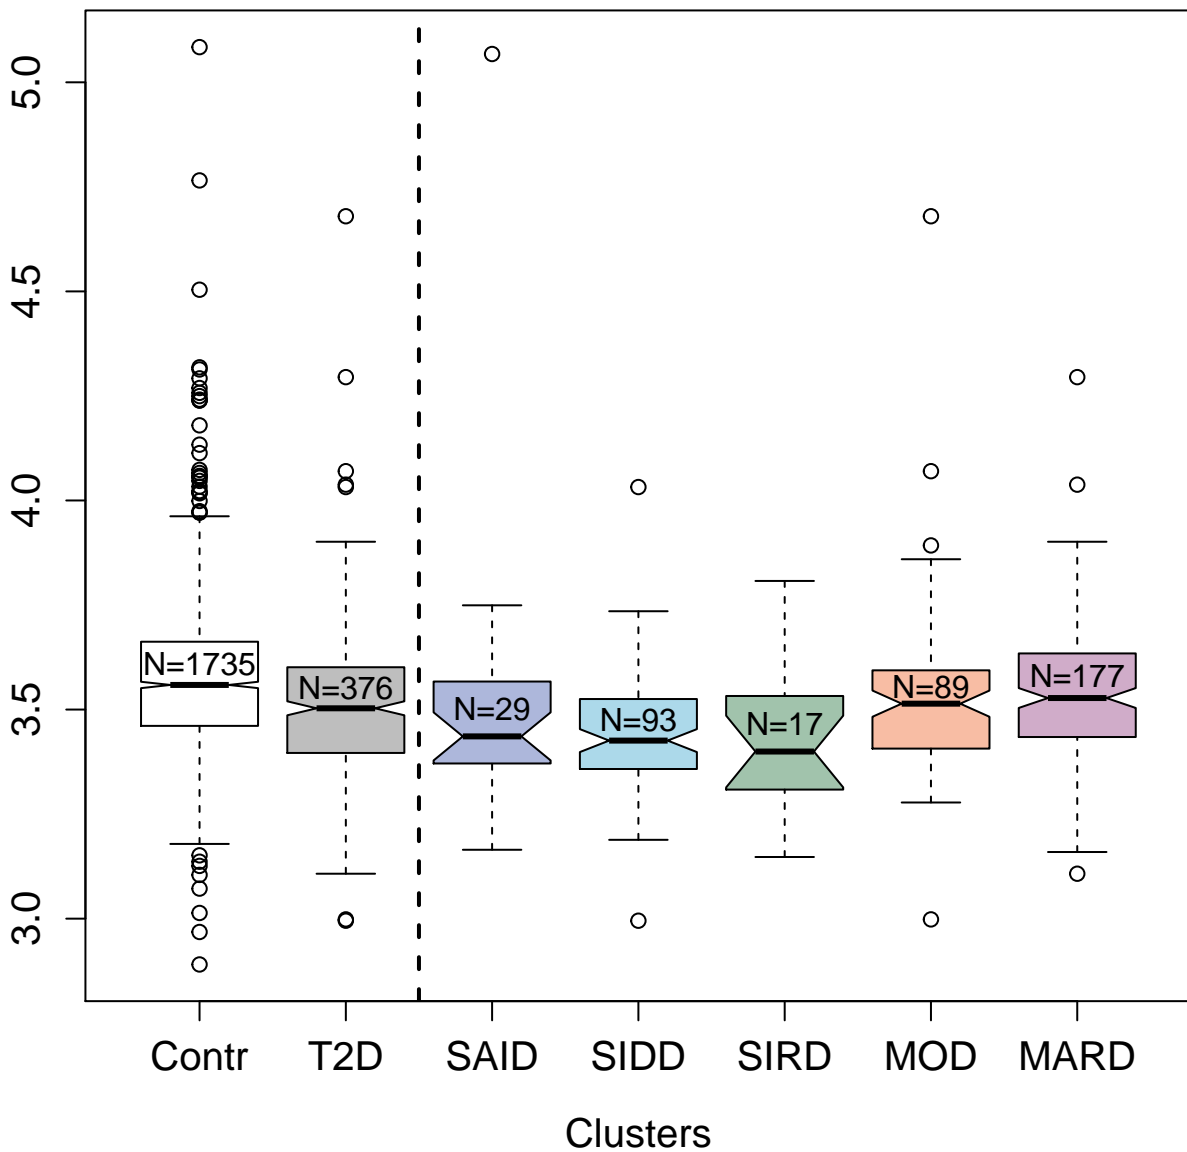

5412-53\_3 : CD27 antigen

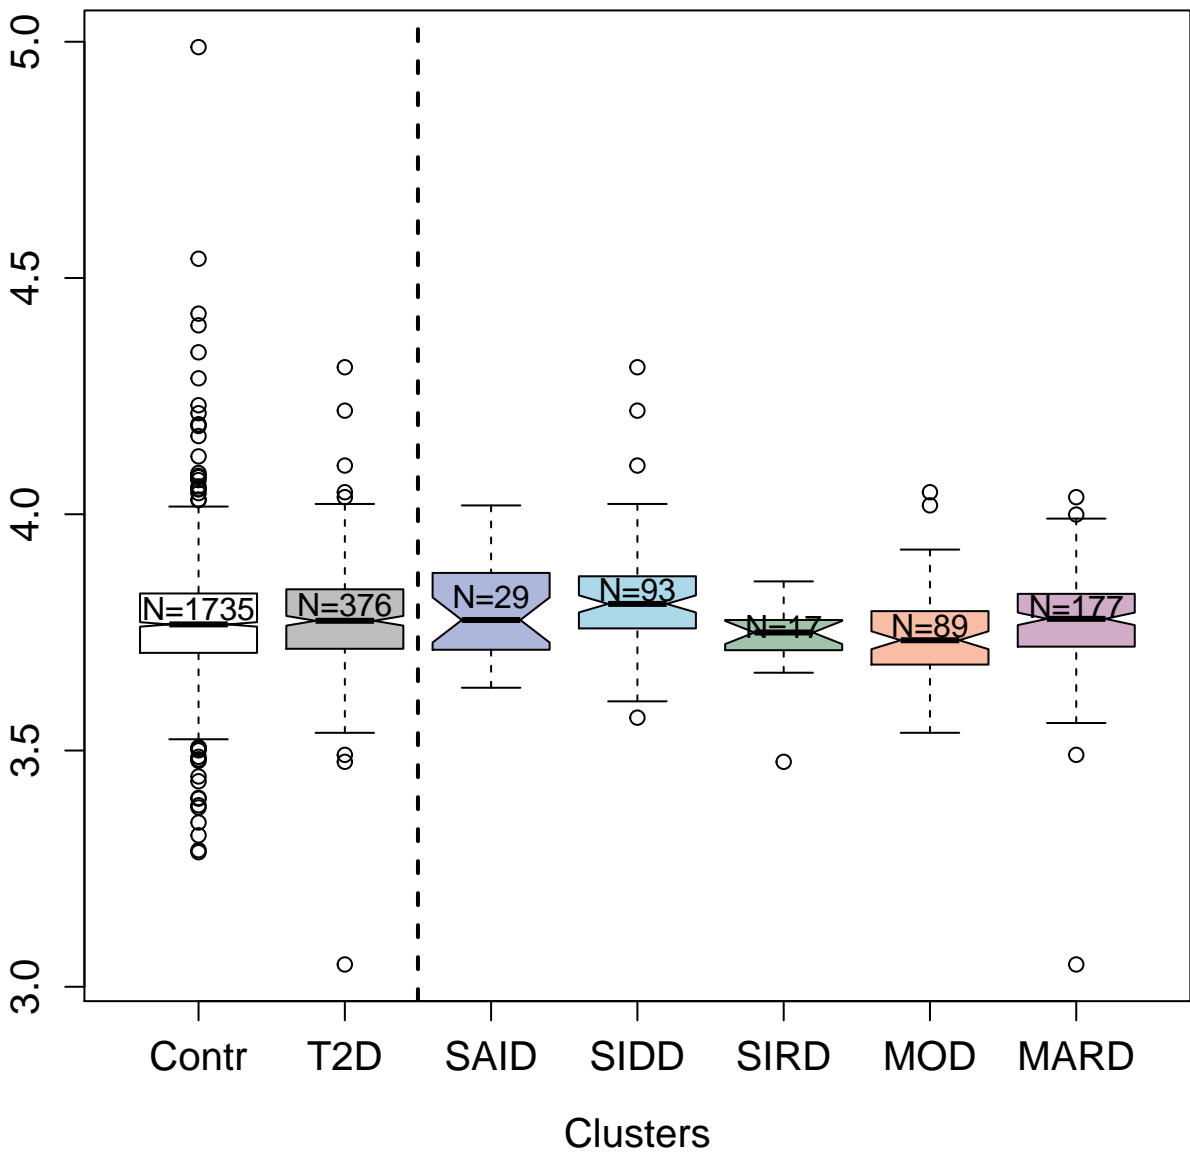

4160-49\_1 : 72 kDa type IV collagenase

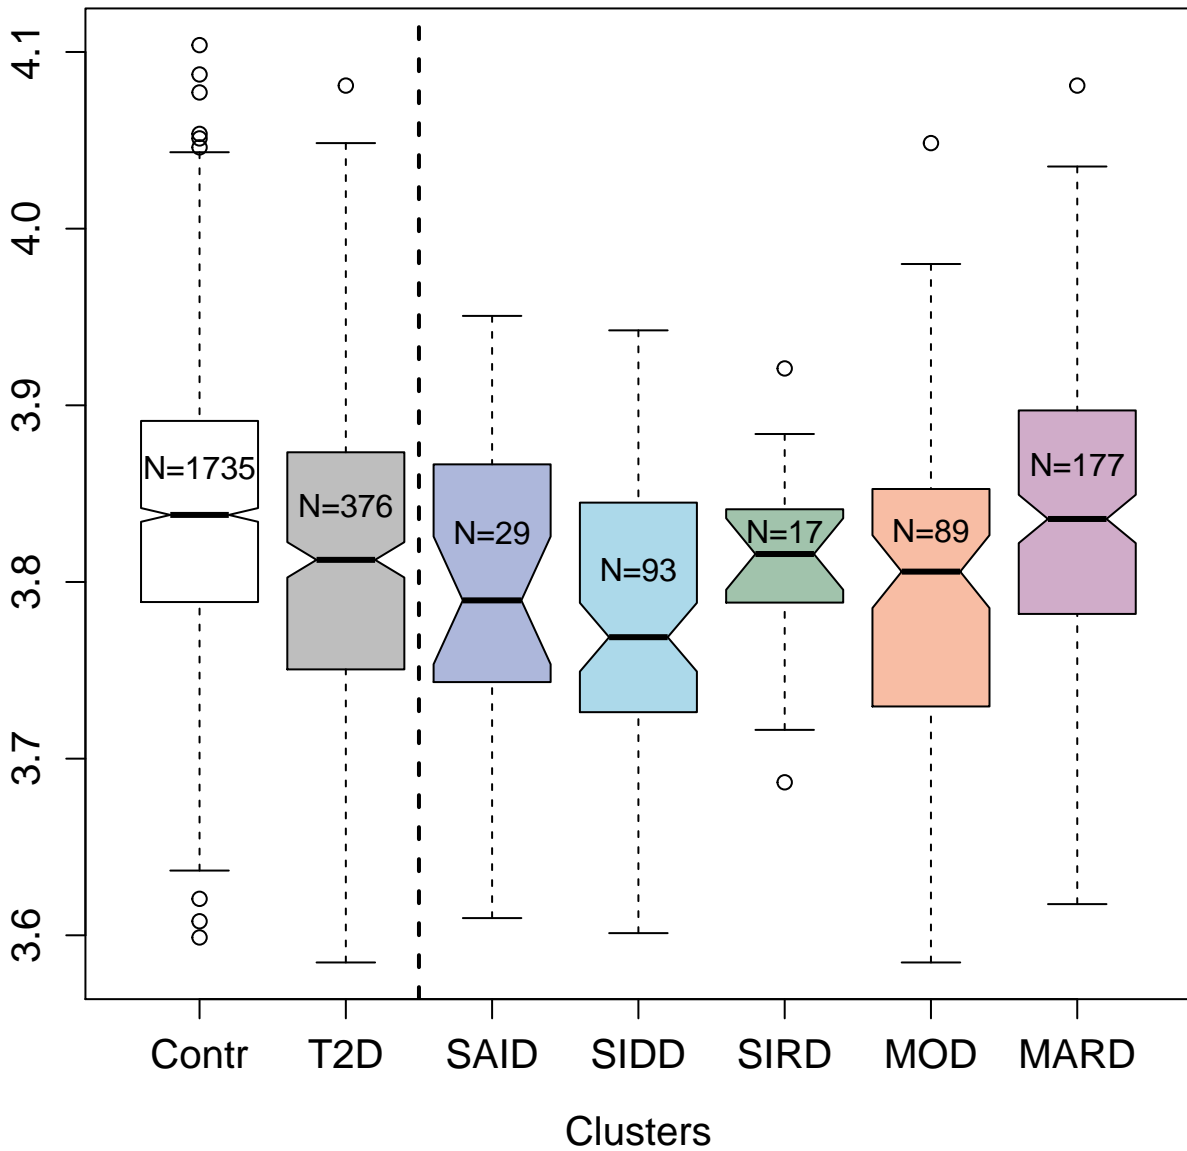

2436-49\_4 : C-X-C motif chemokine 16

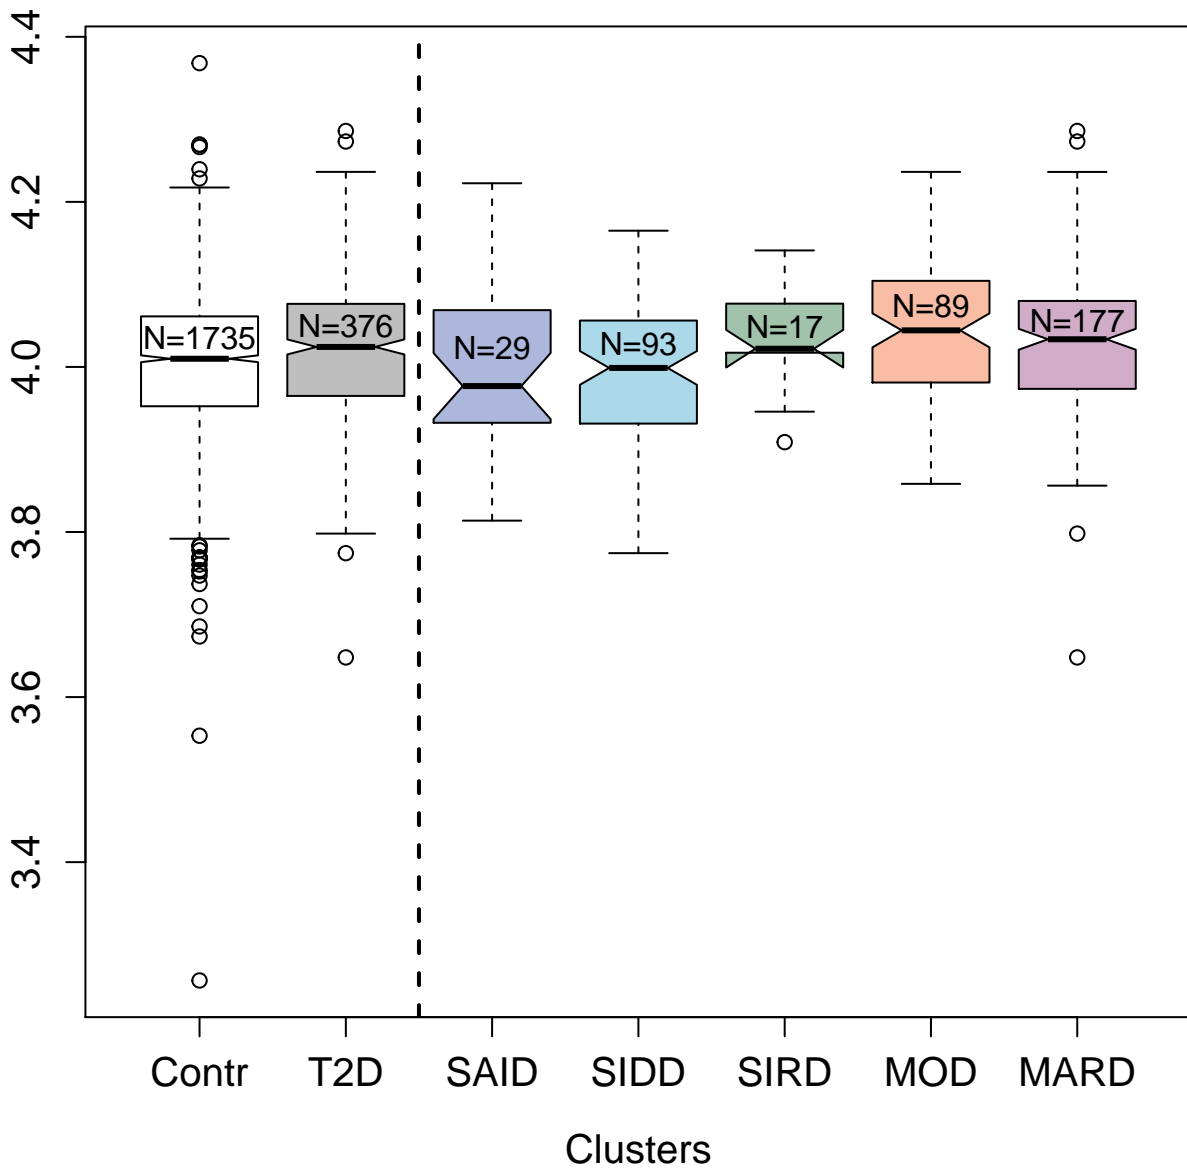



4157-2\_1 : Thrombin

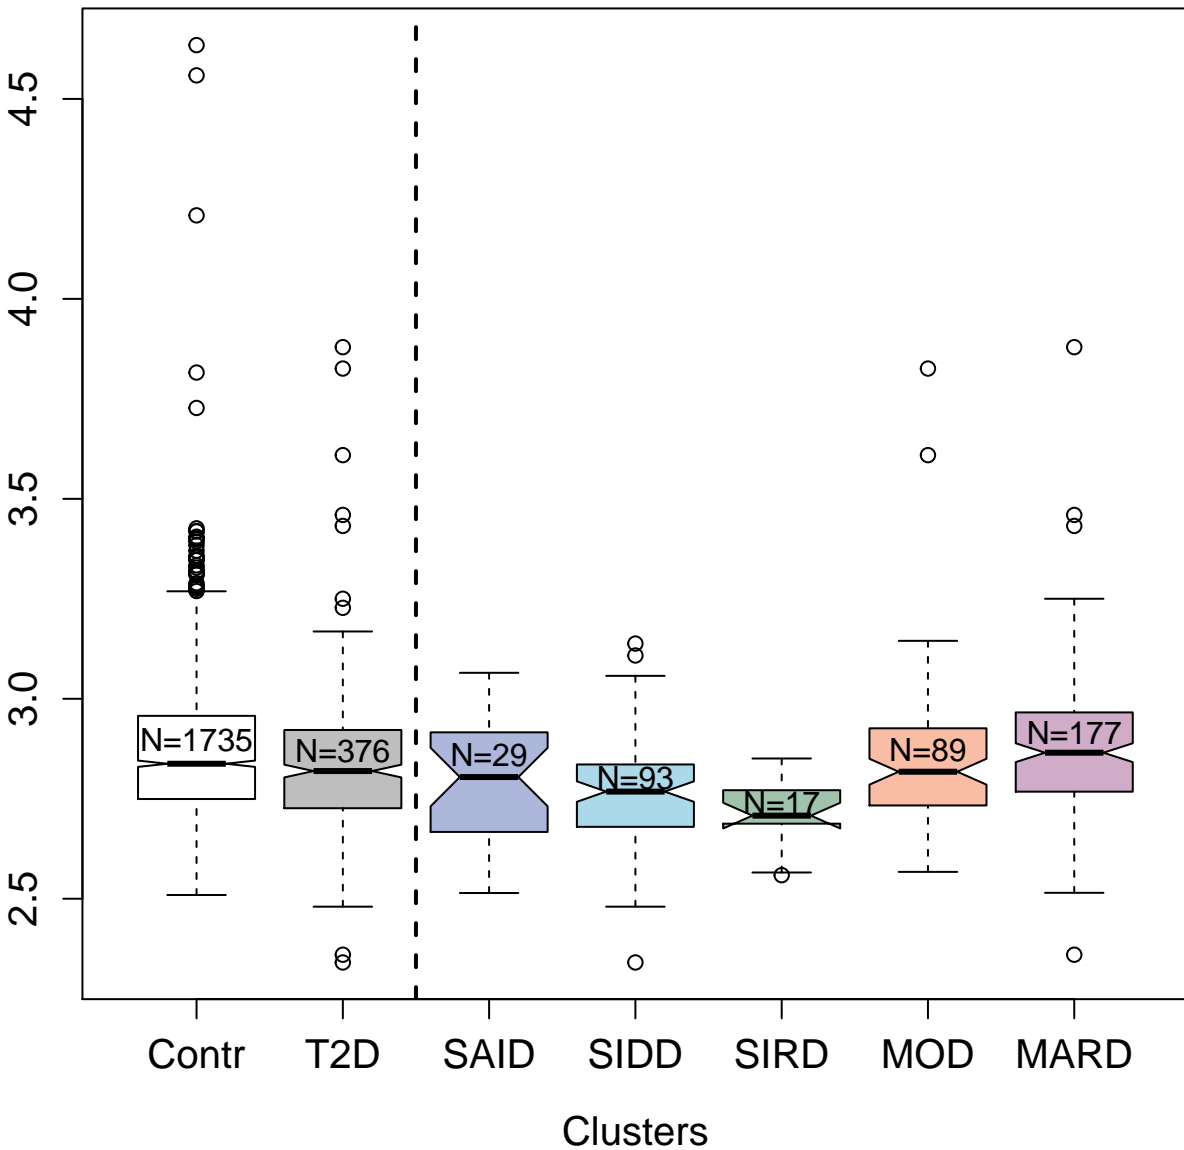

4920-10\_1 : Lysozyme C

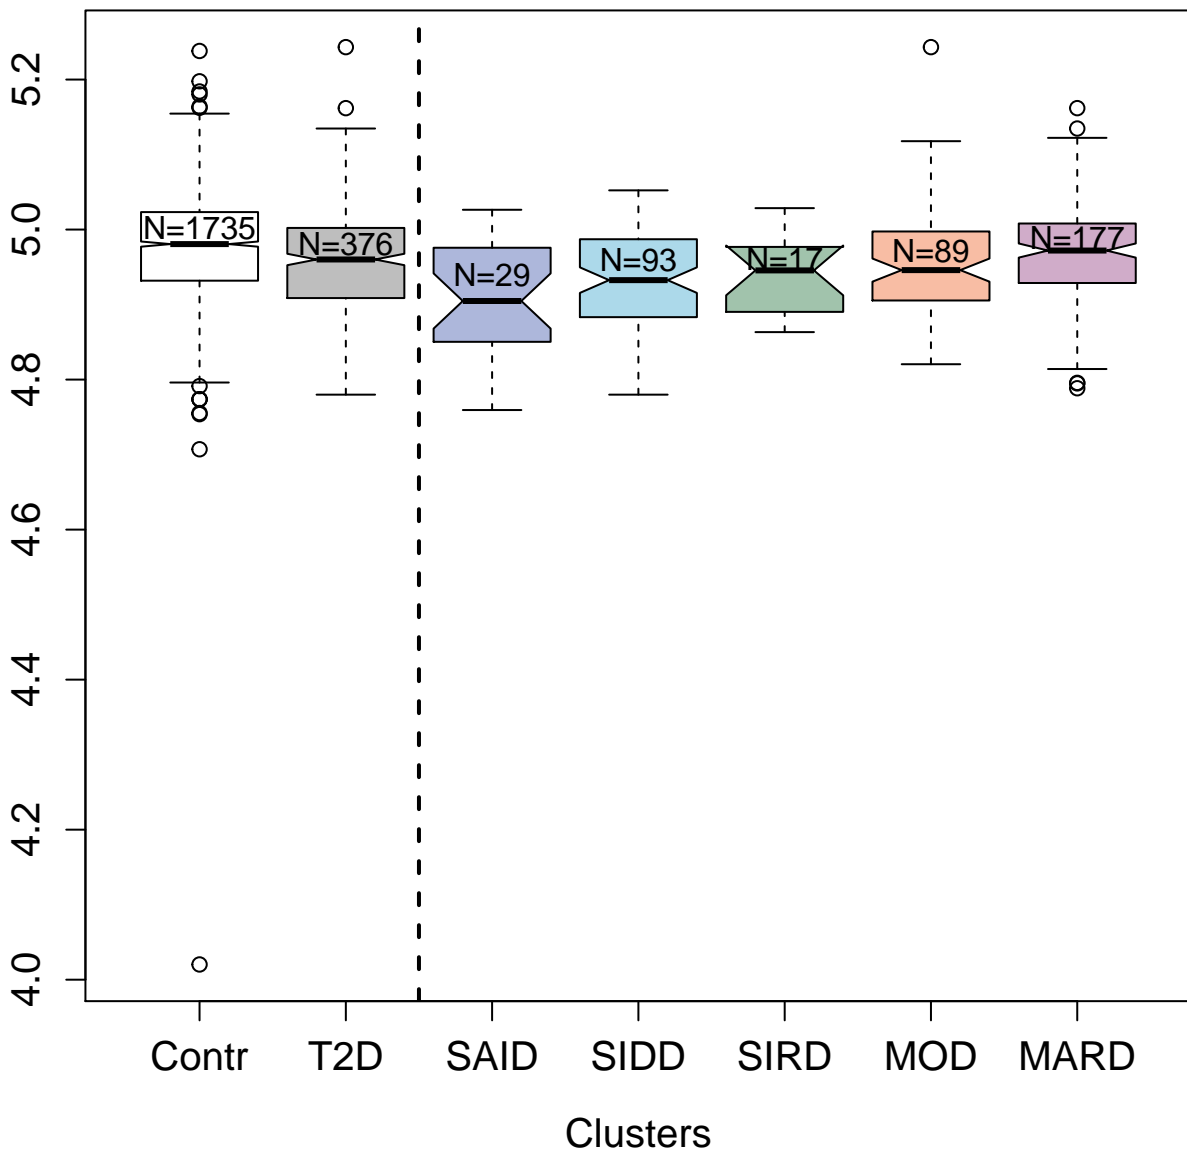

3028-36\_2 : Ck-beta-8-1

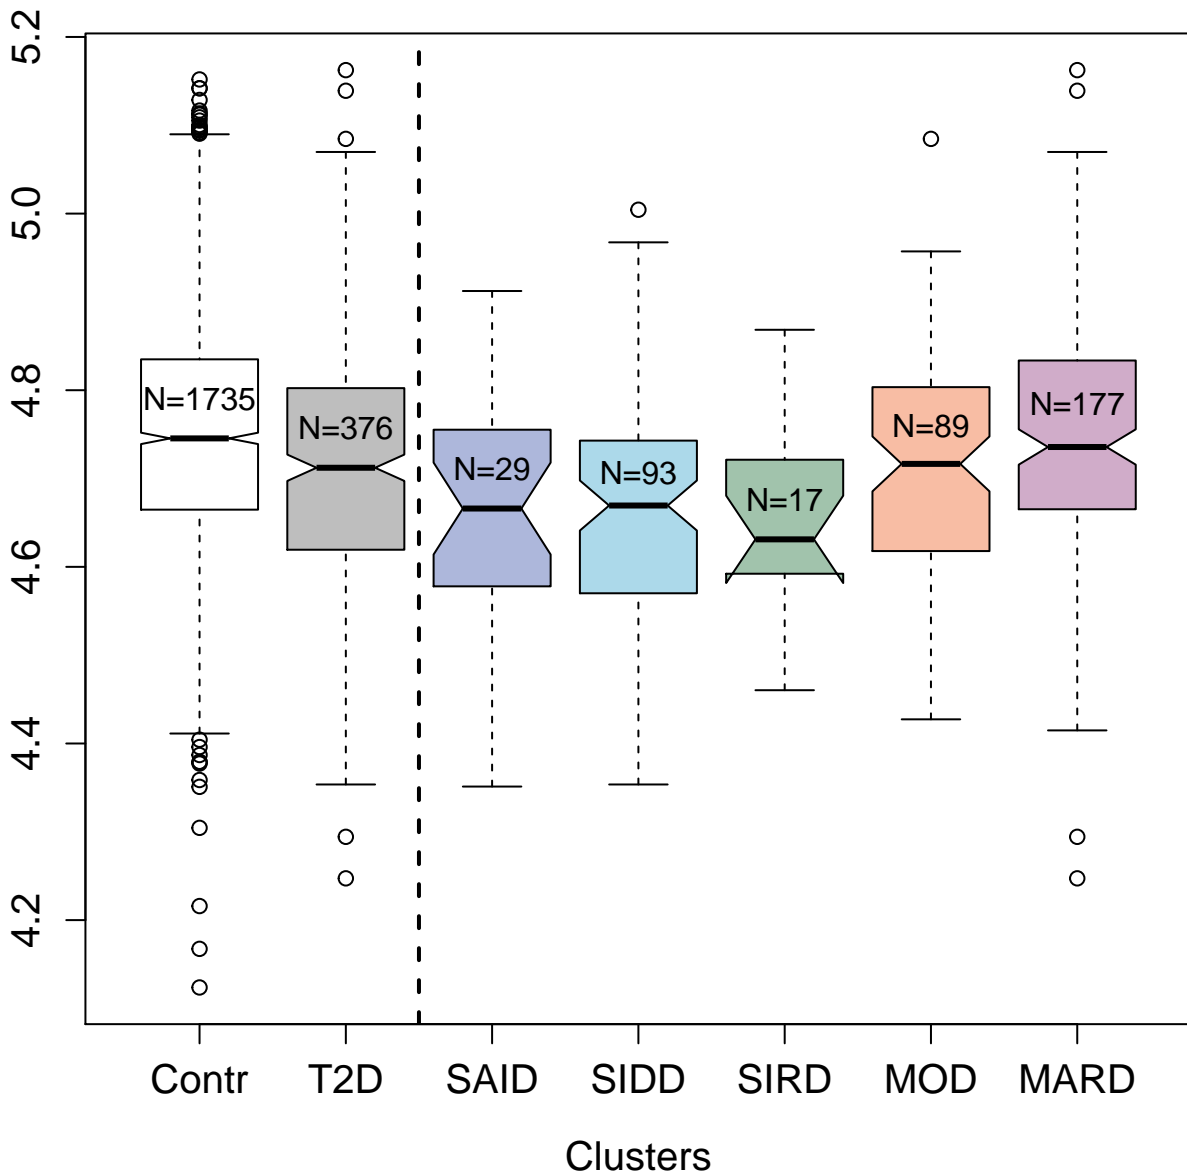

5837-49\_3 : Leukemia inhibitory factor receptor

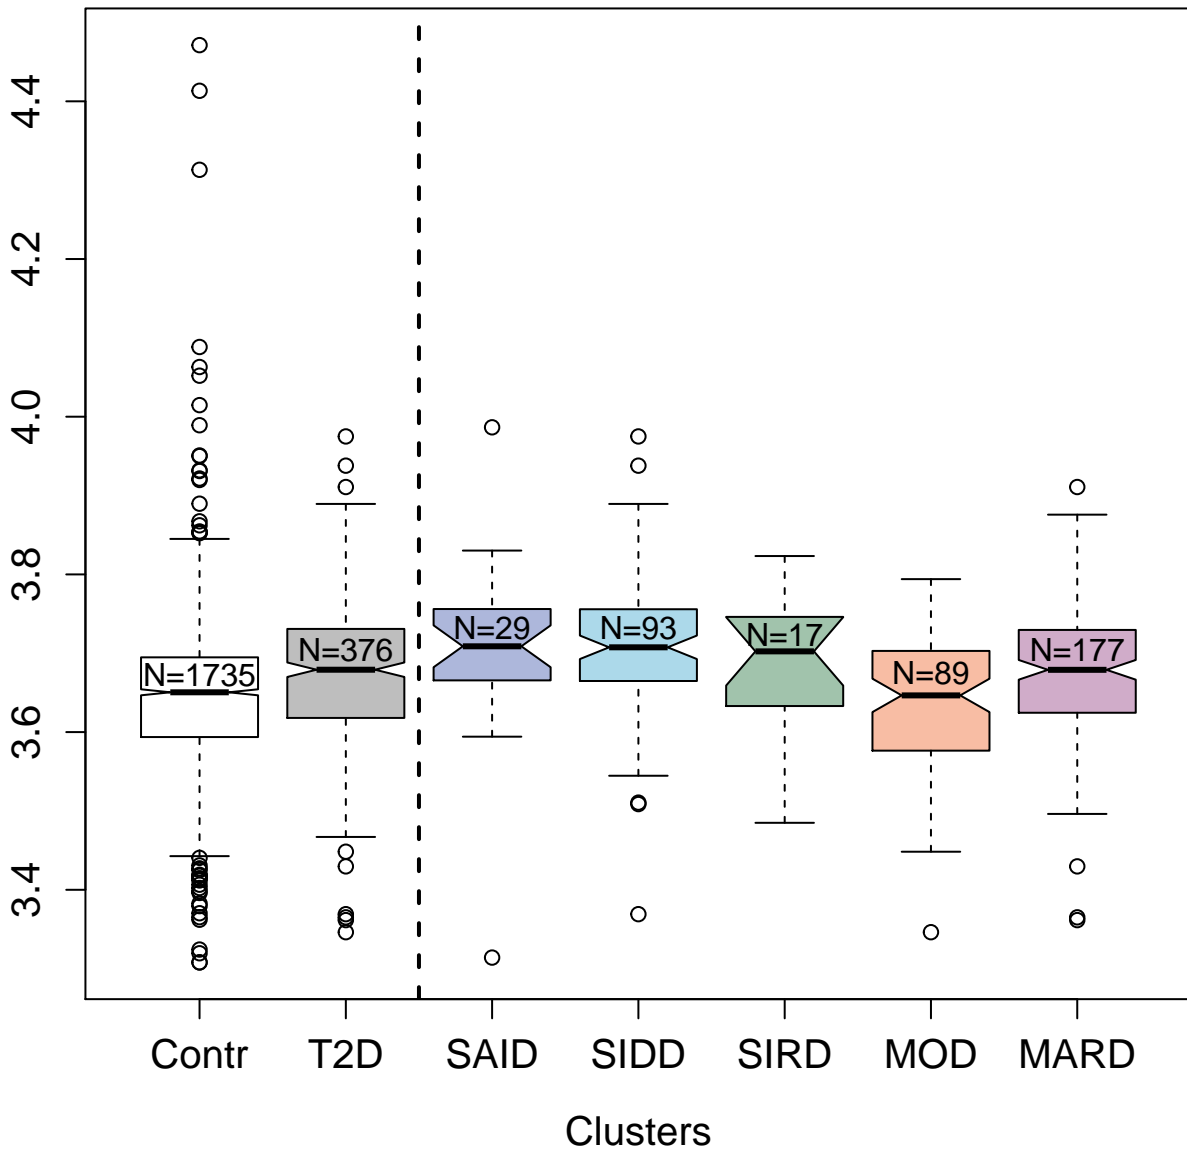

3009-3\_2 : Transforming growth factor beta  
receptor type 3

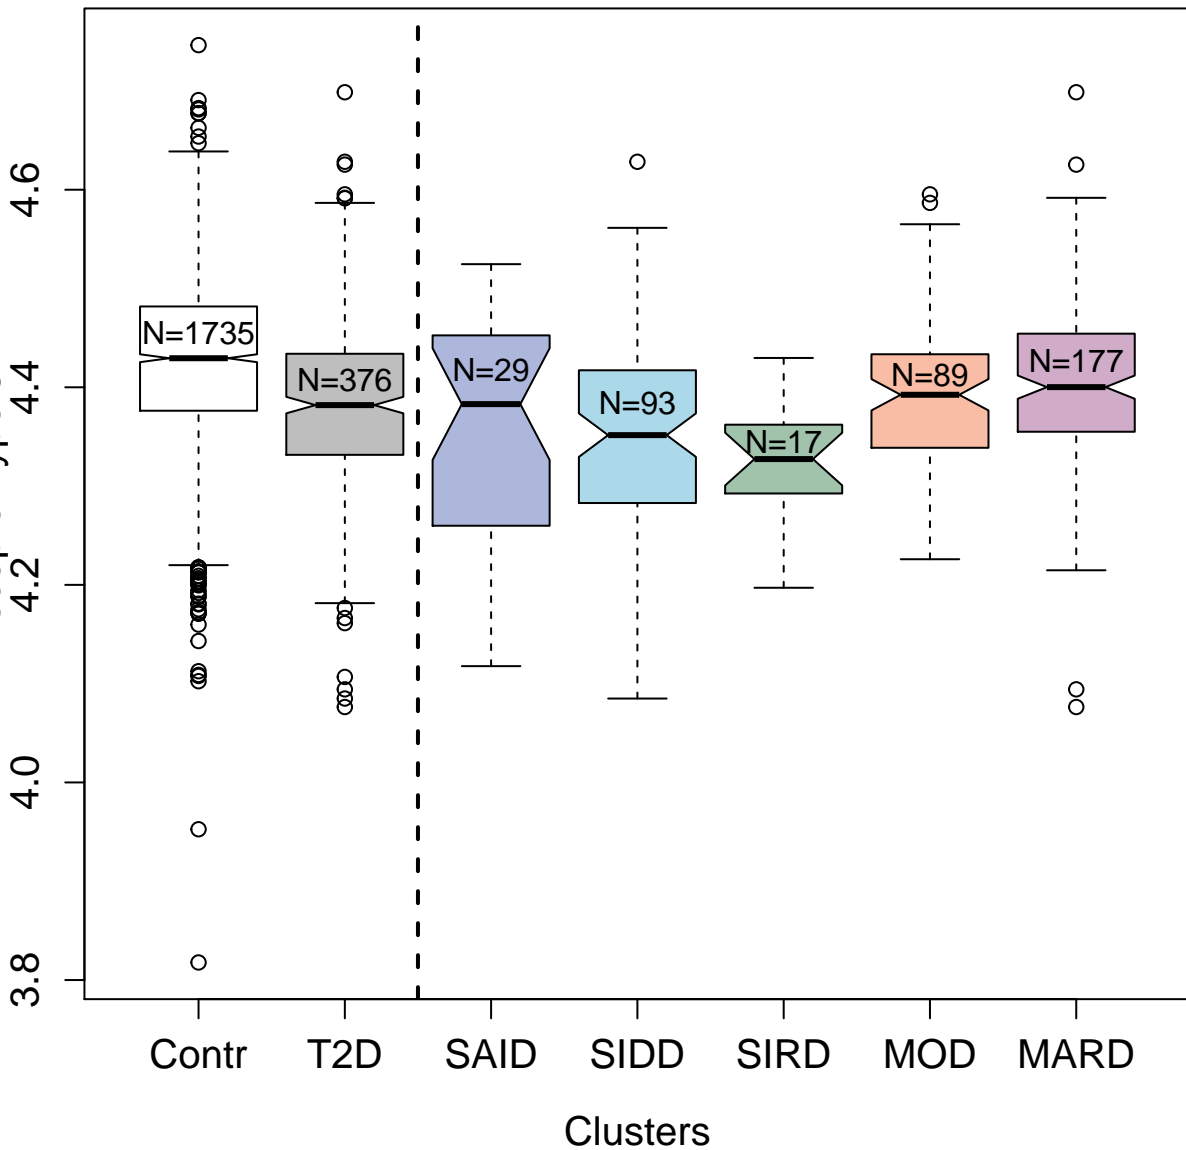

2686-67\_2 : Insulin-like growth factor-binding

protein 6

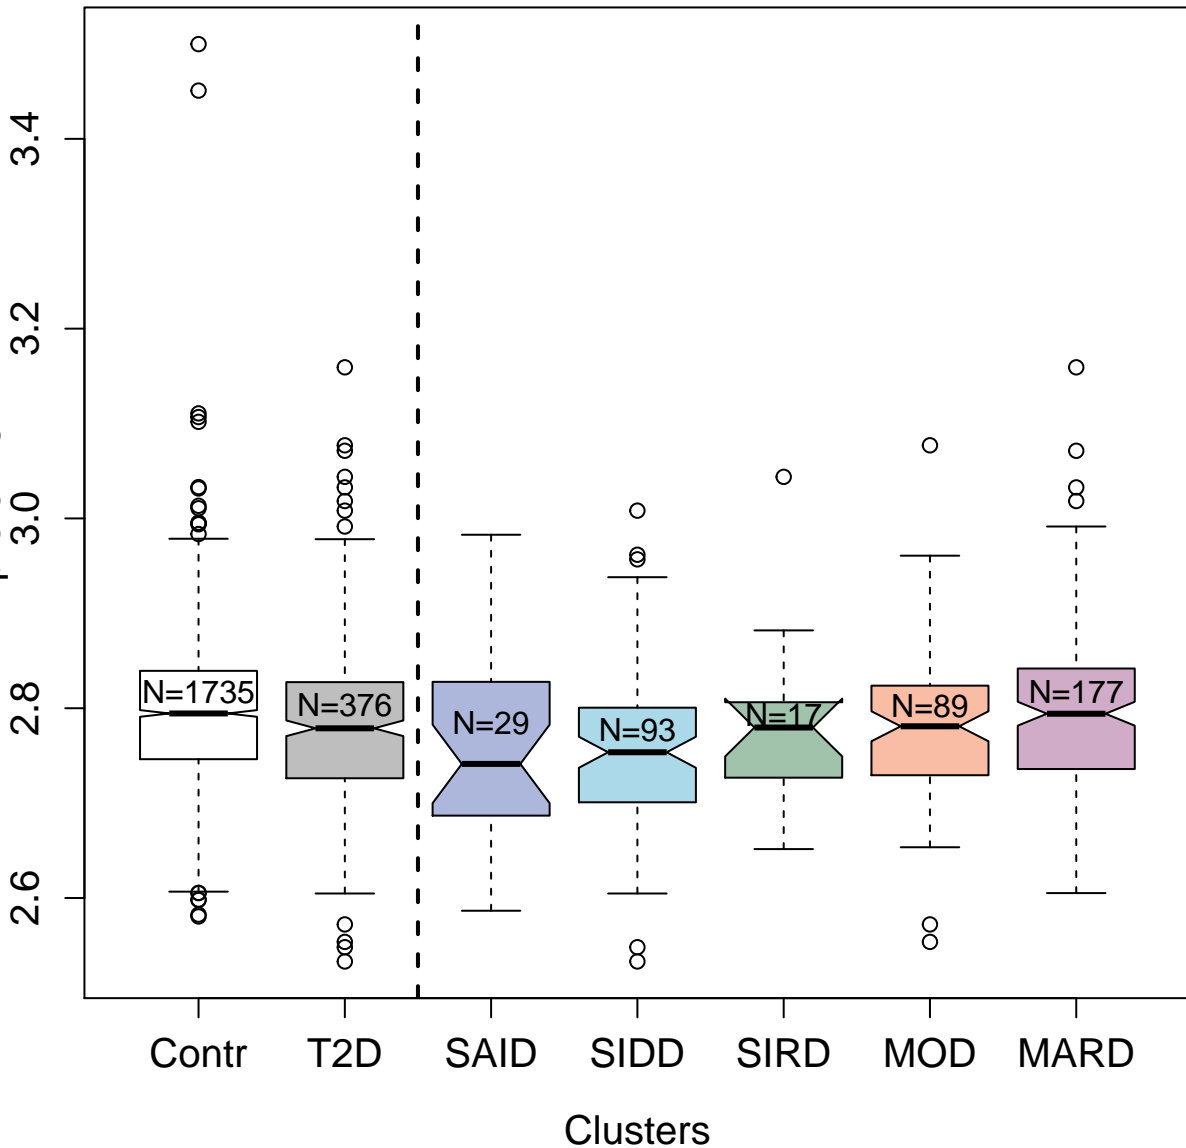

2752-62\_2 : Growth/differentiation factor 5

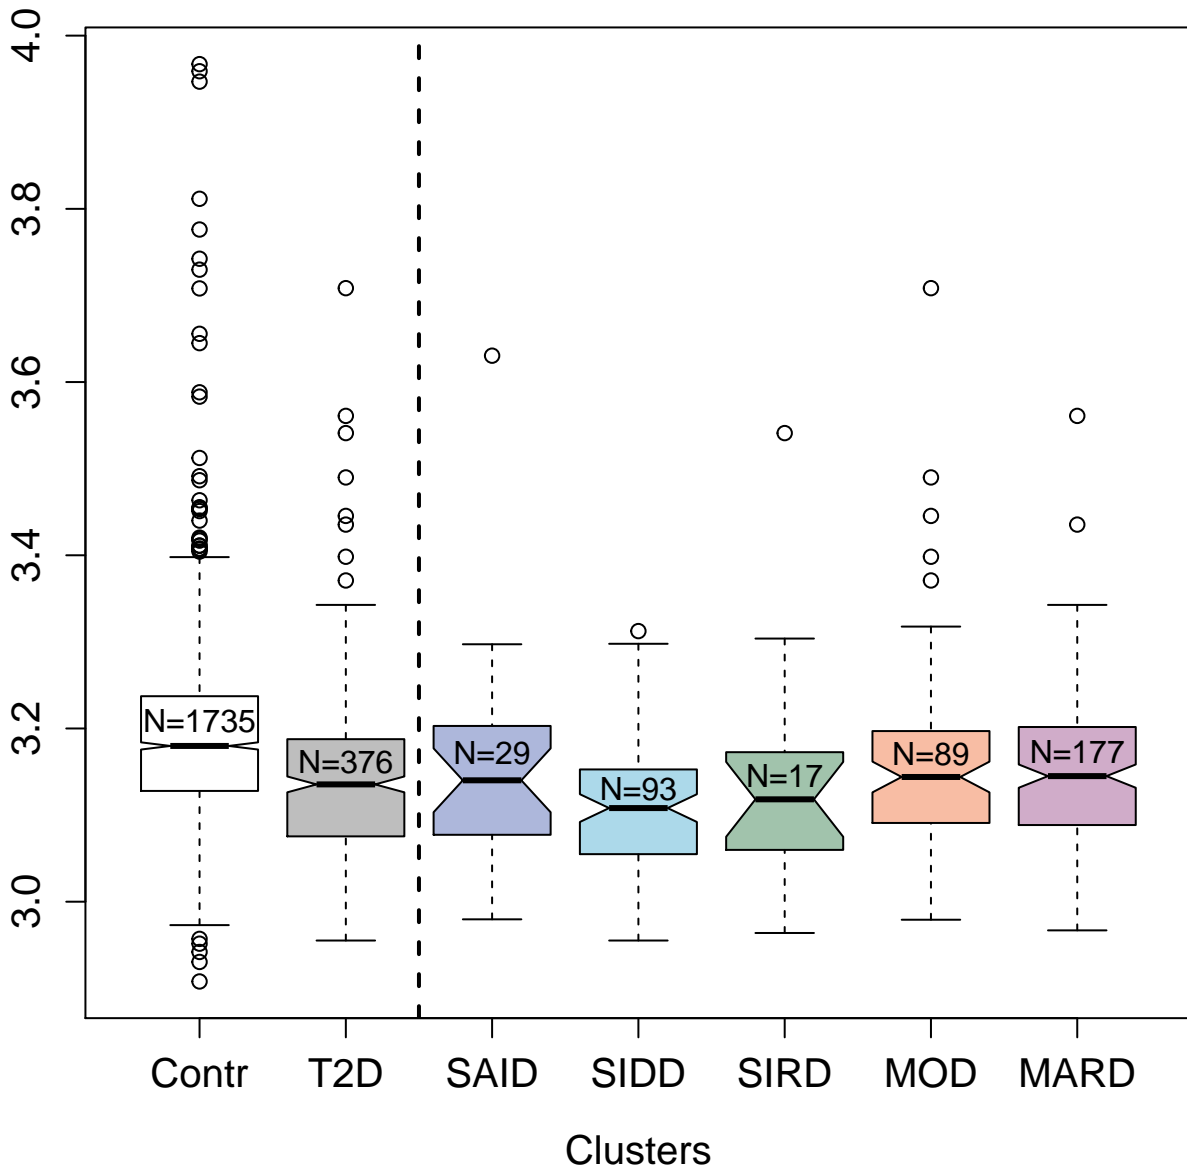

2973-15\_2 : Platelet glycoprotein 4

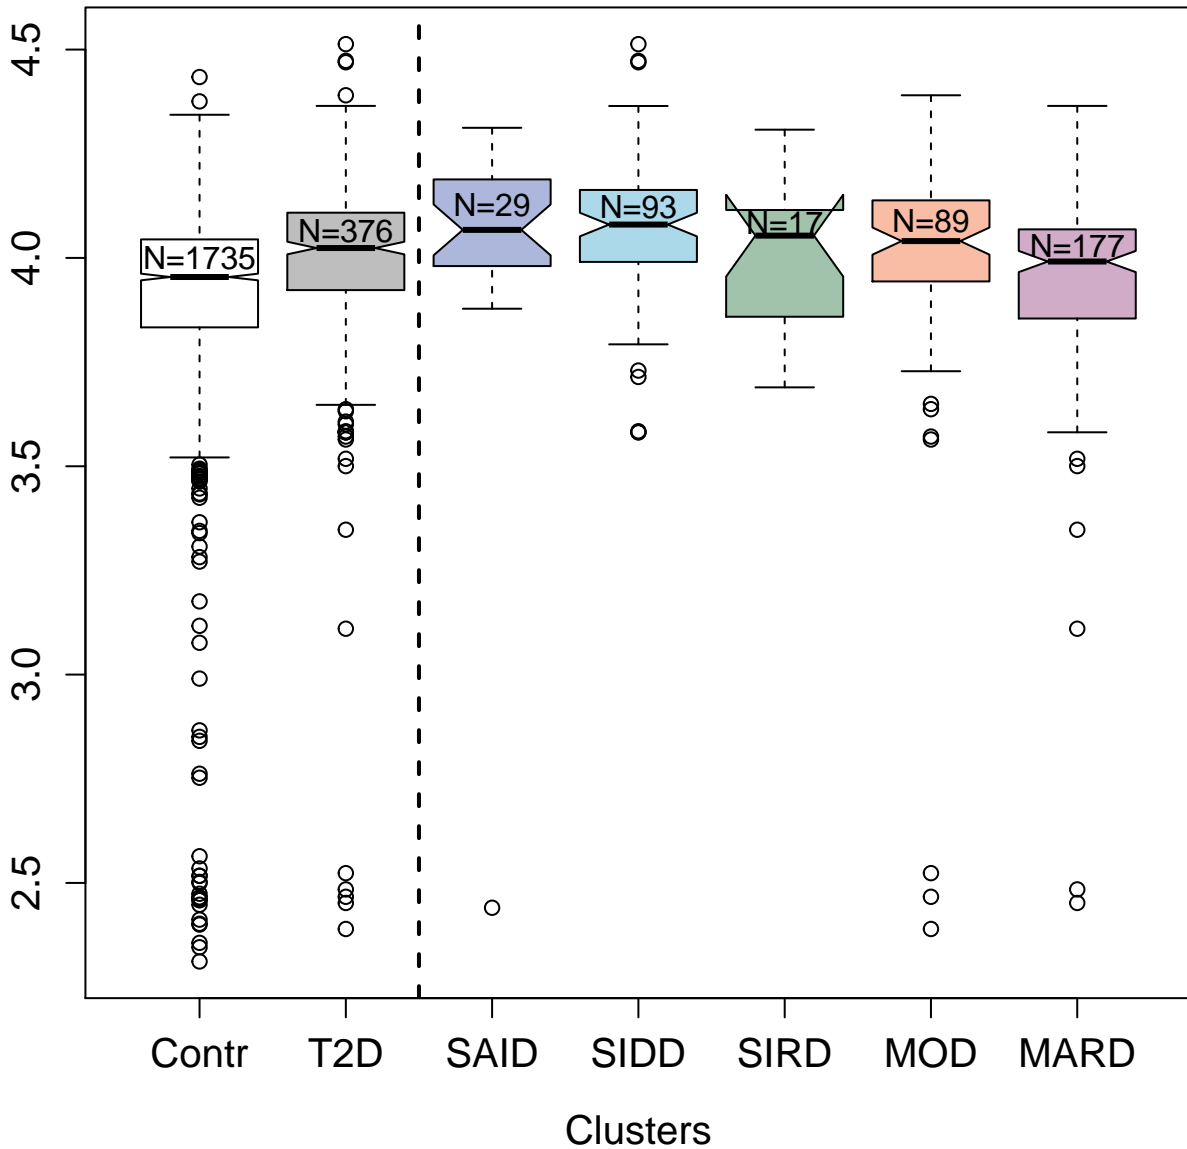



4272-46\_2 : Glucose-6-phosphate isomerase

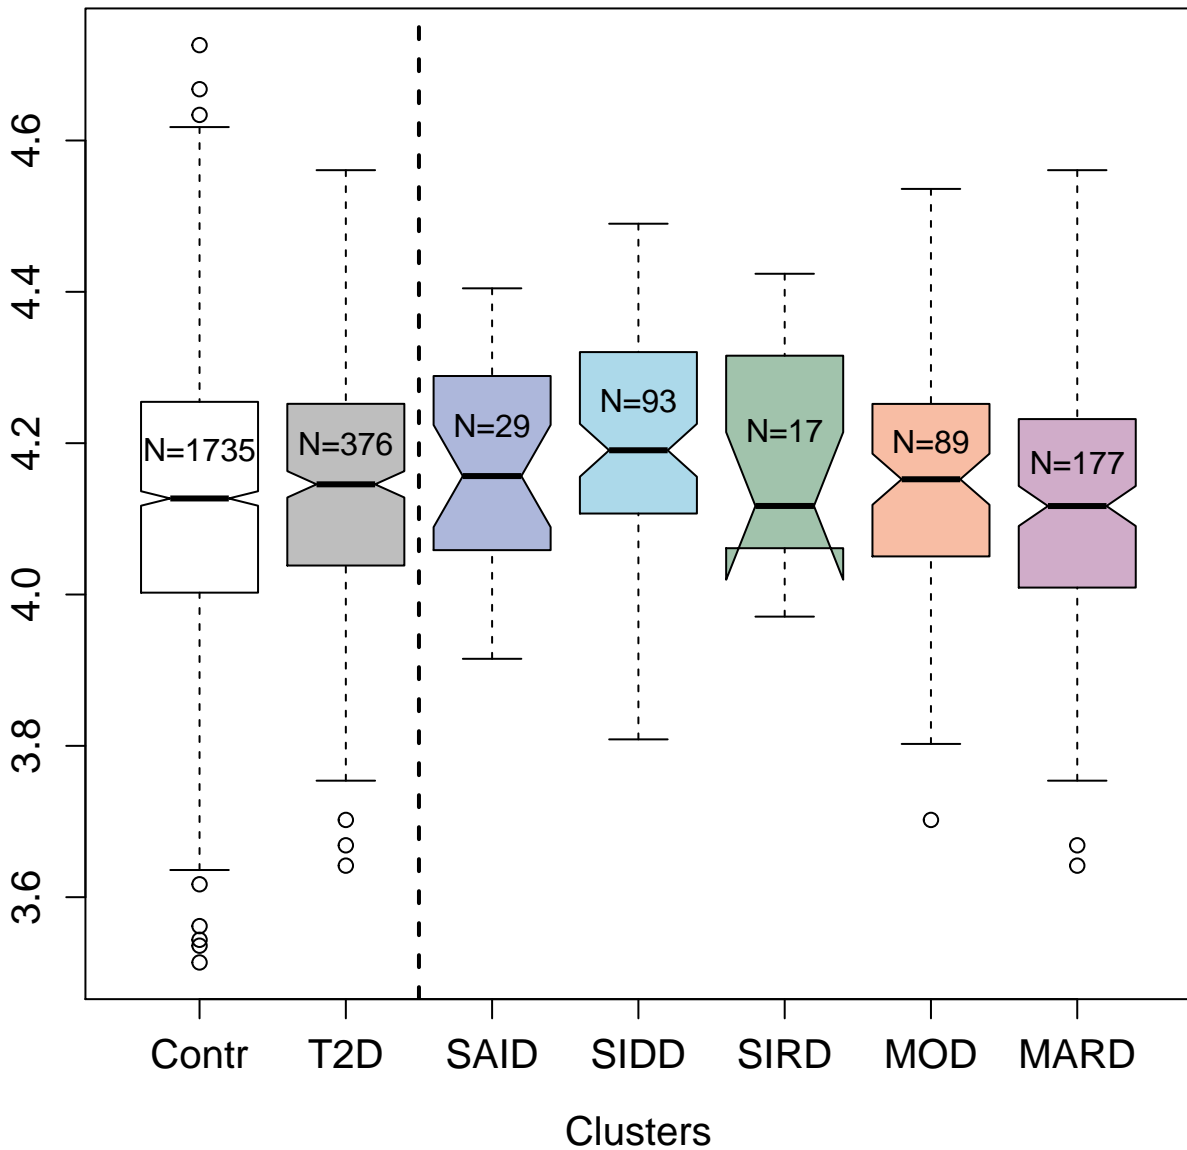

4280-47\_2 : Proteasome subunit alpha type-2

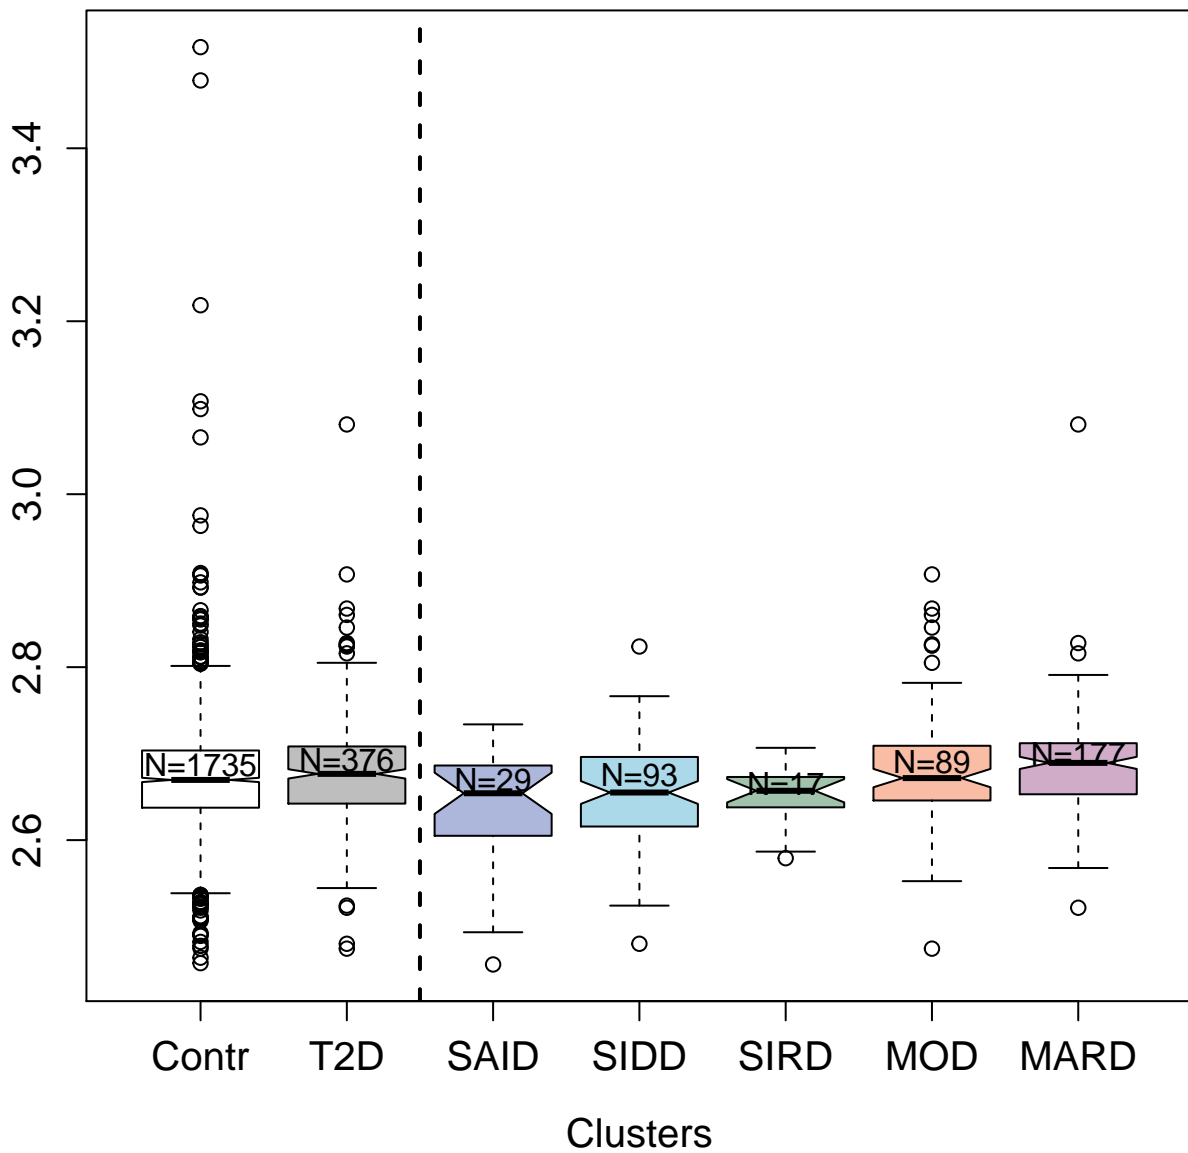

4141-79\_1 : C-X-C motif chemokine 10

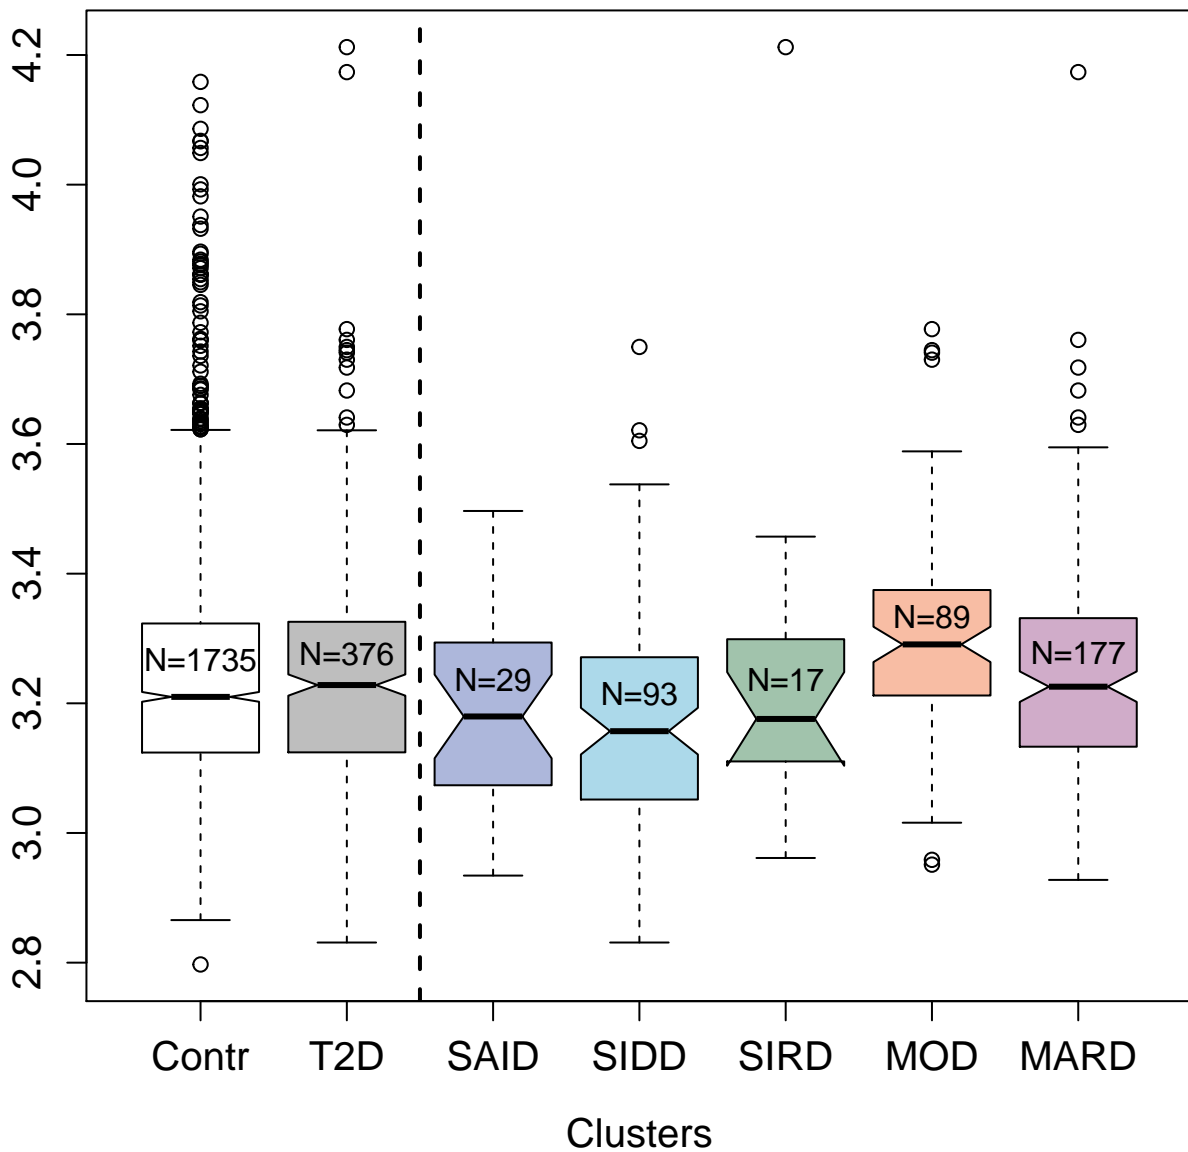

4314-12\_2 : dCTP pyrophosphatase 1

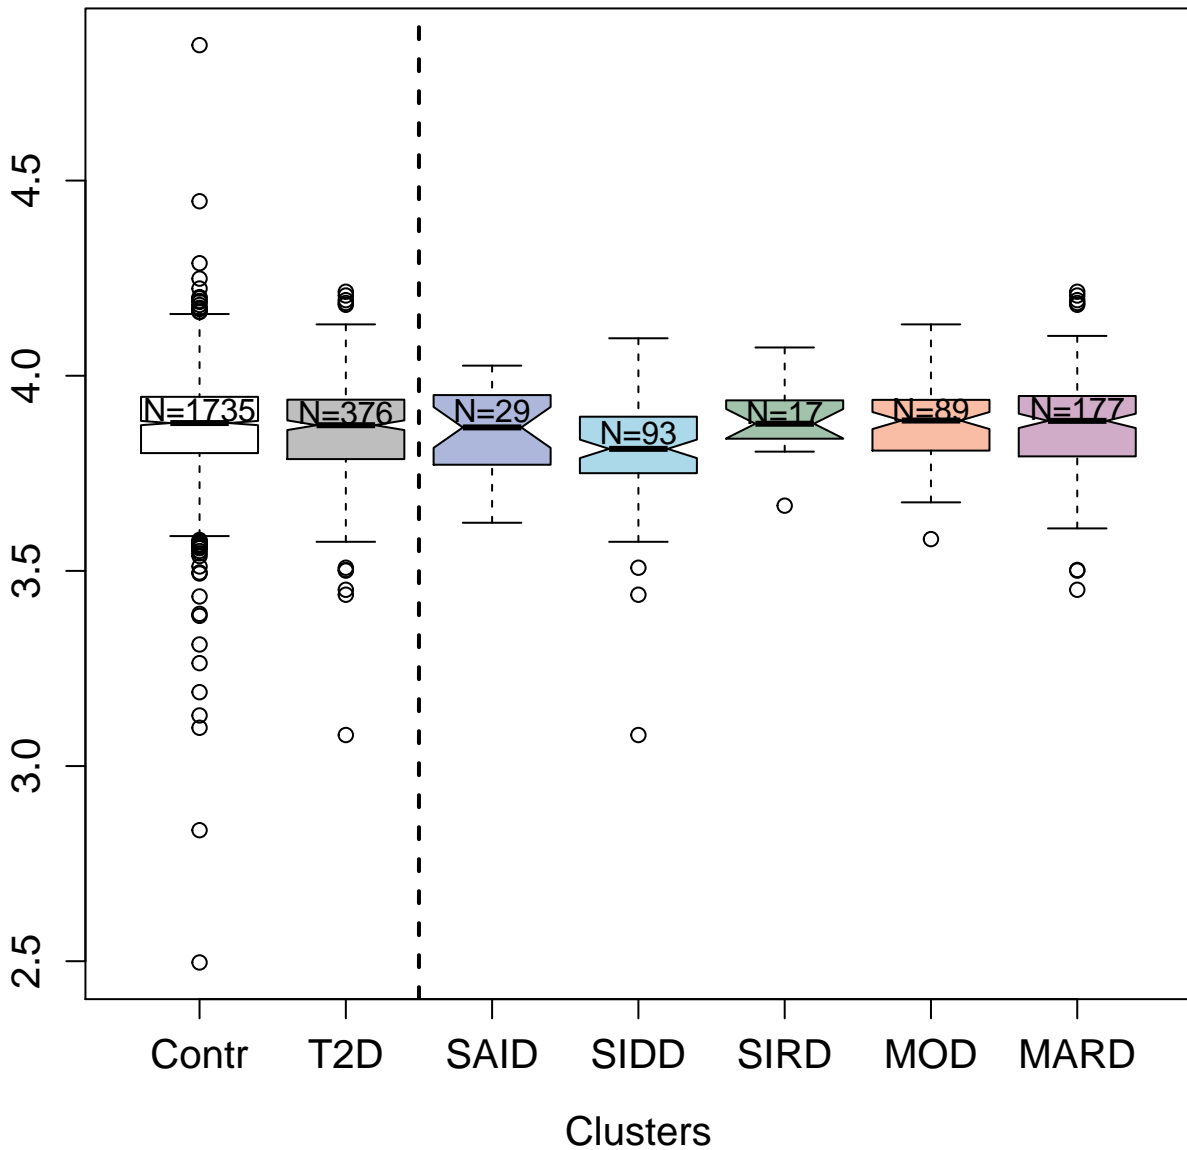

3509-1\_1 : C-C motif chemokine 15

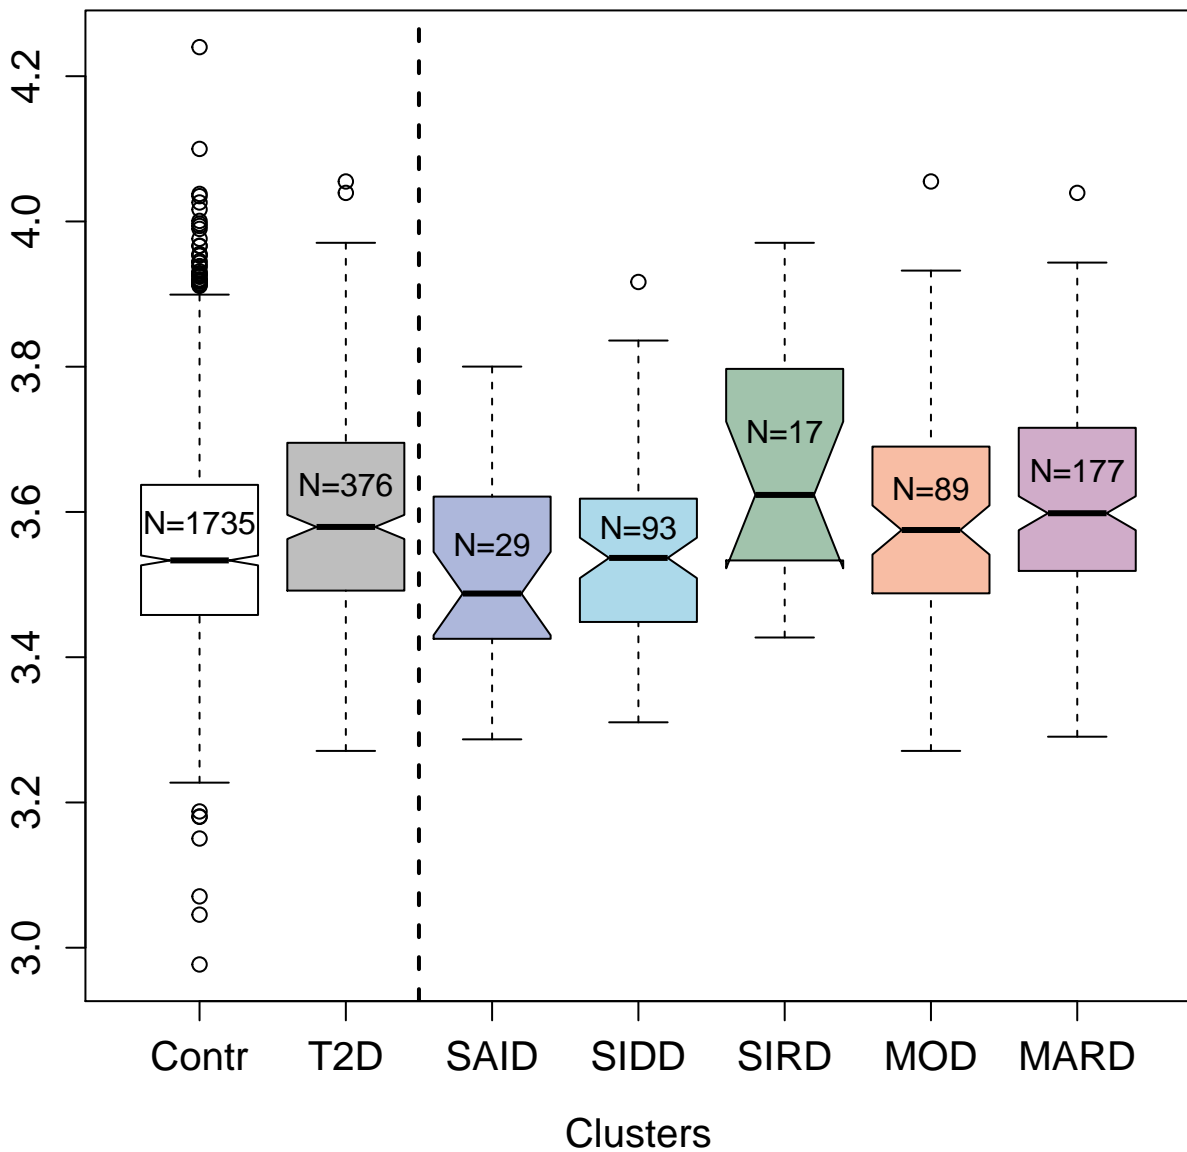

4474-19\_2 : Ubiquitin

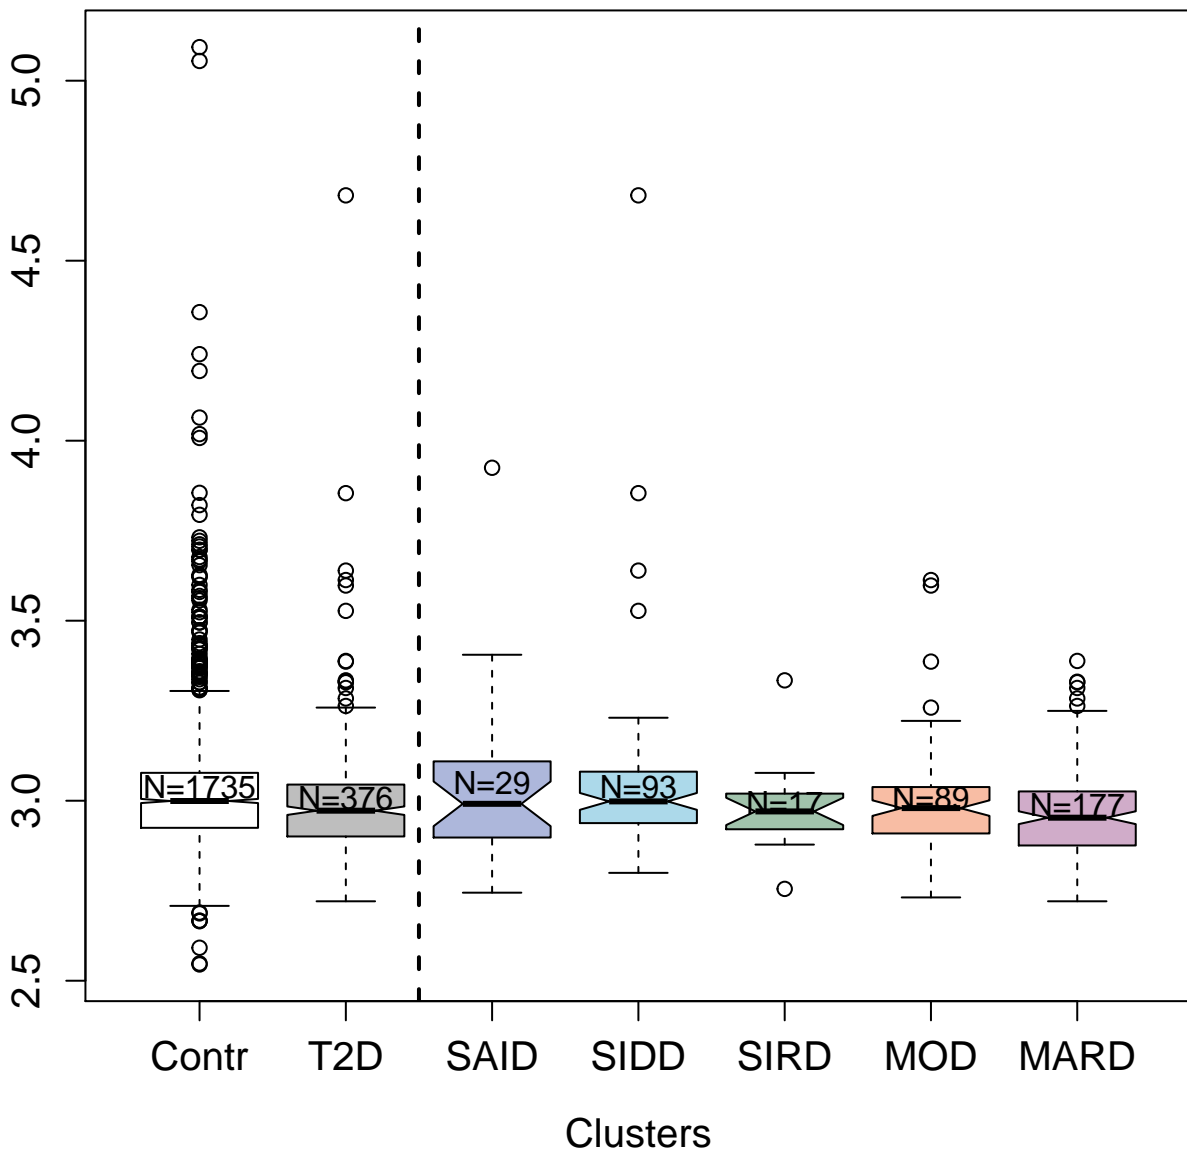

3362-61\_2 : Chordin-like protein 1

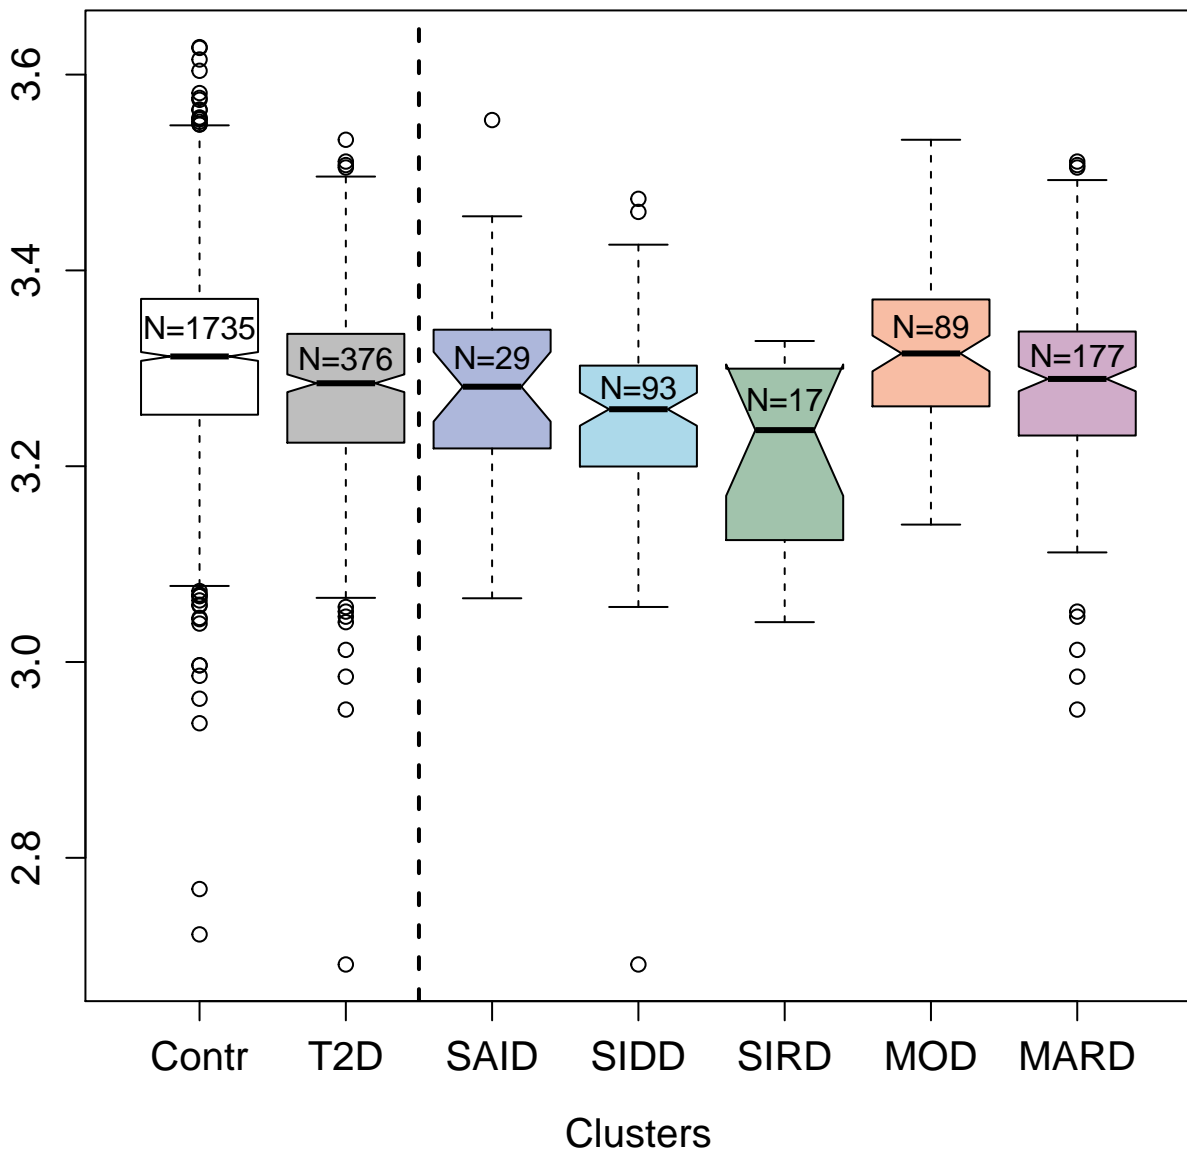

3446-7\_2 : Interleukin-18 receptor 1

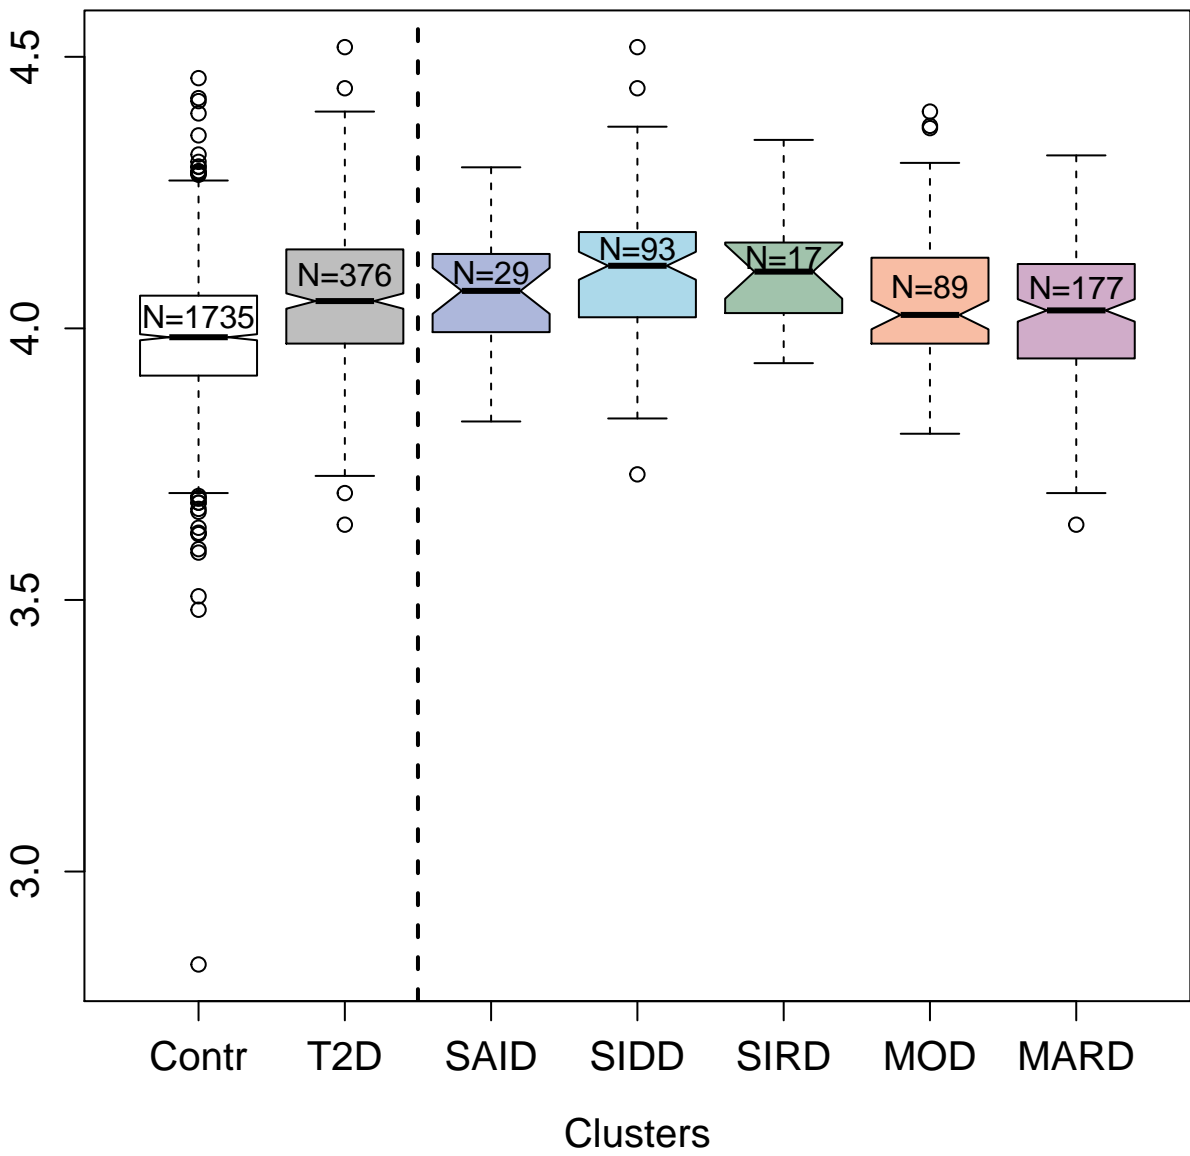



3415-61\_2 : Bone sialoprotein 2

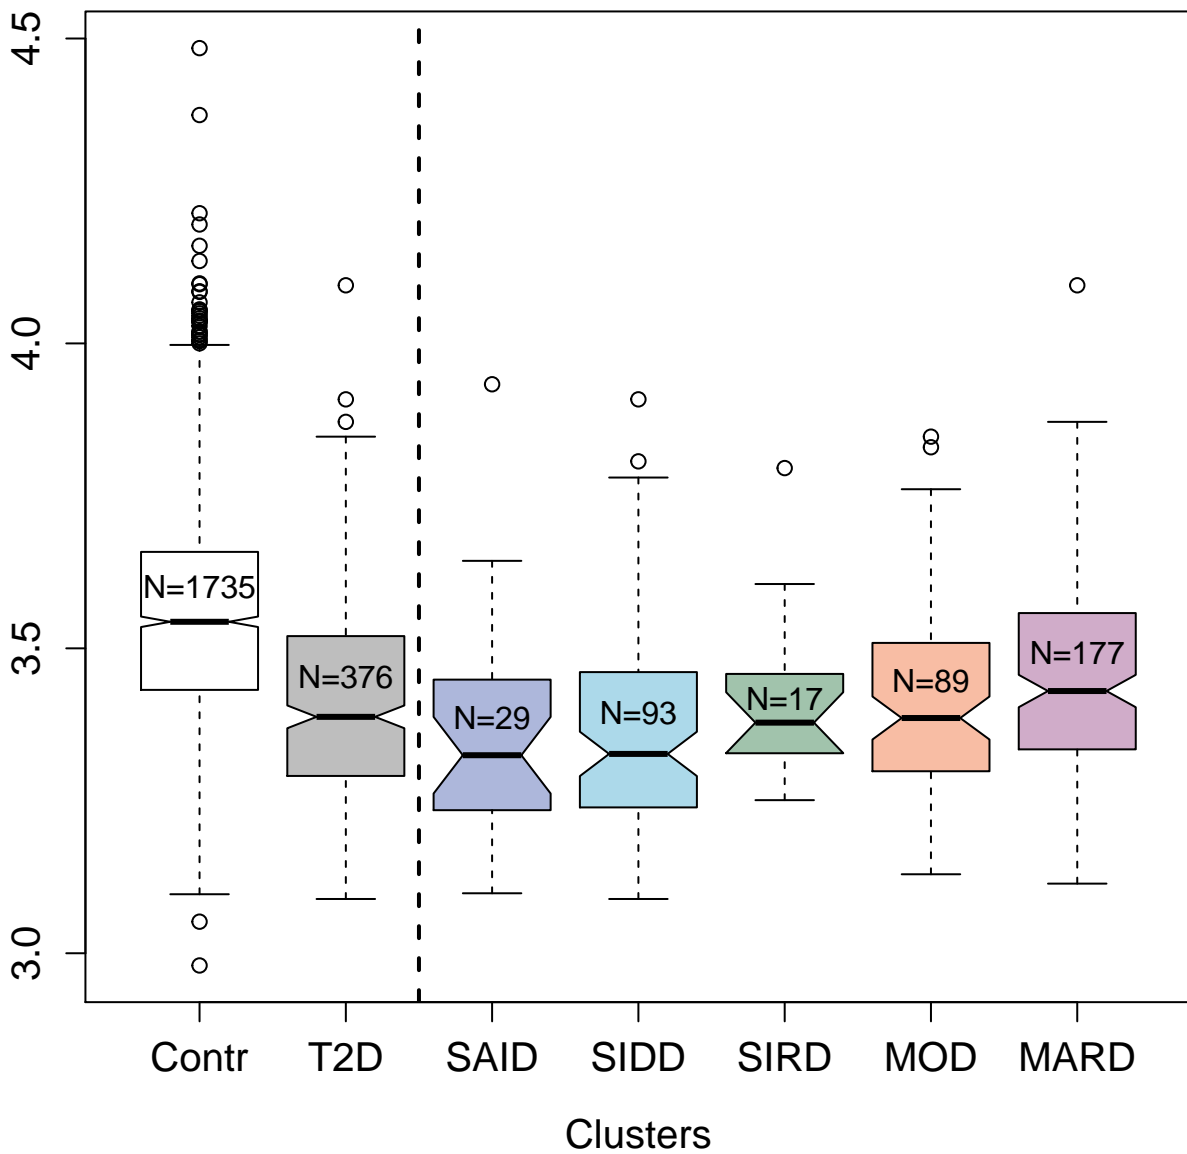

2609-59\_2 : Cystatin-C

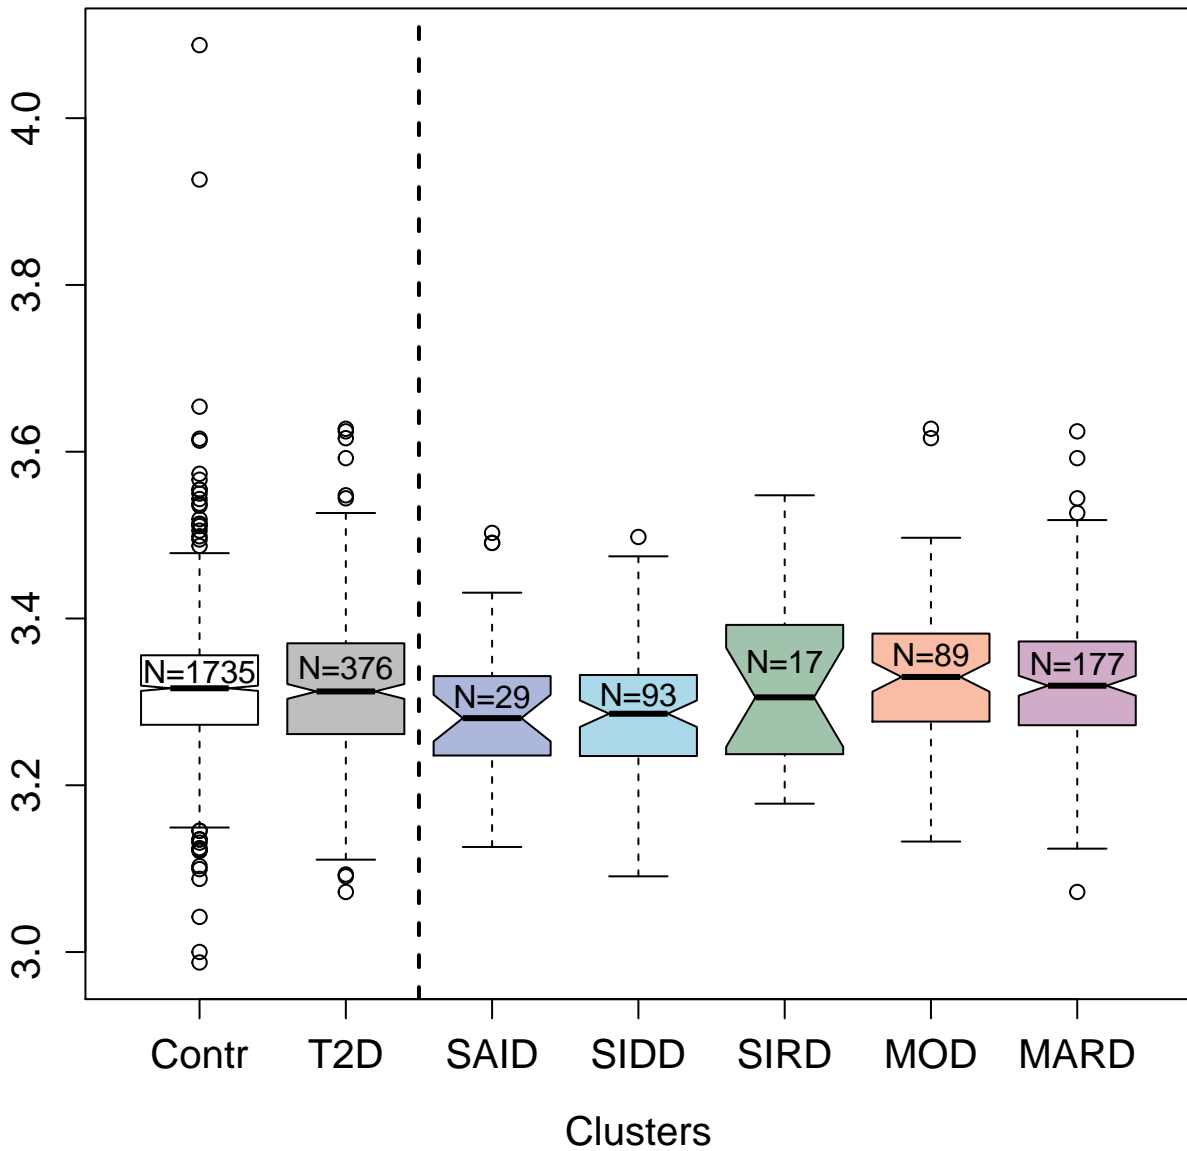

14136-234\_3 : Complement component C1q receptor

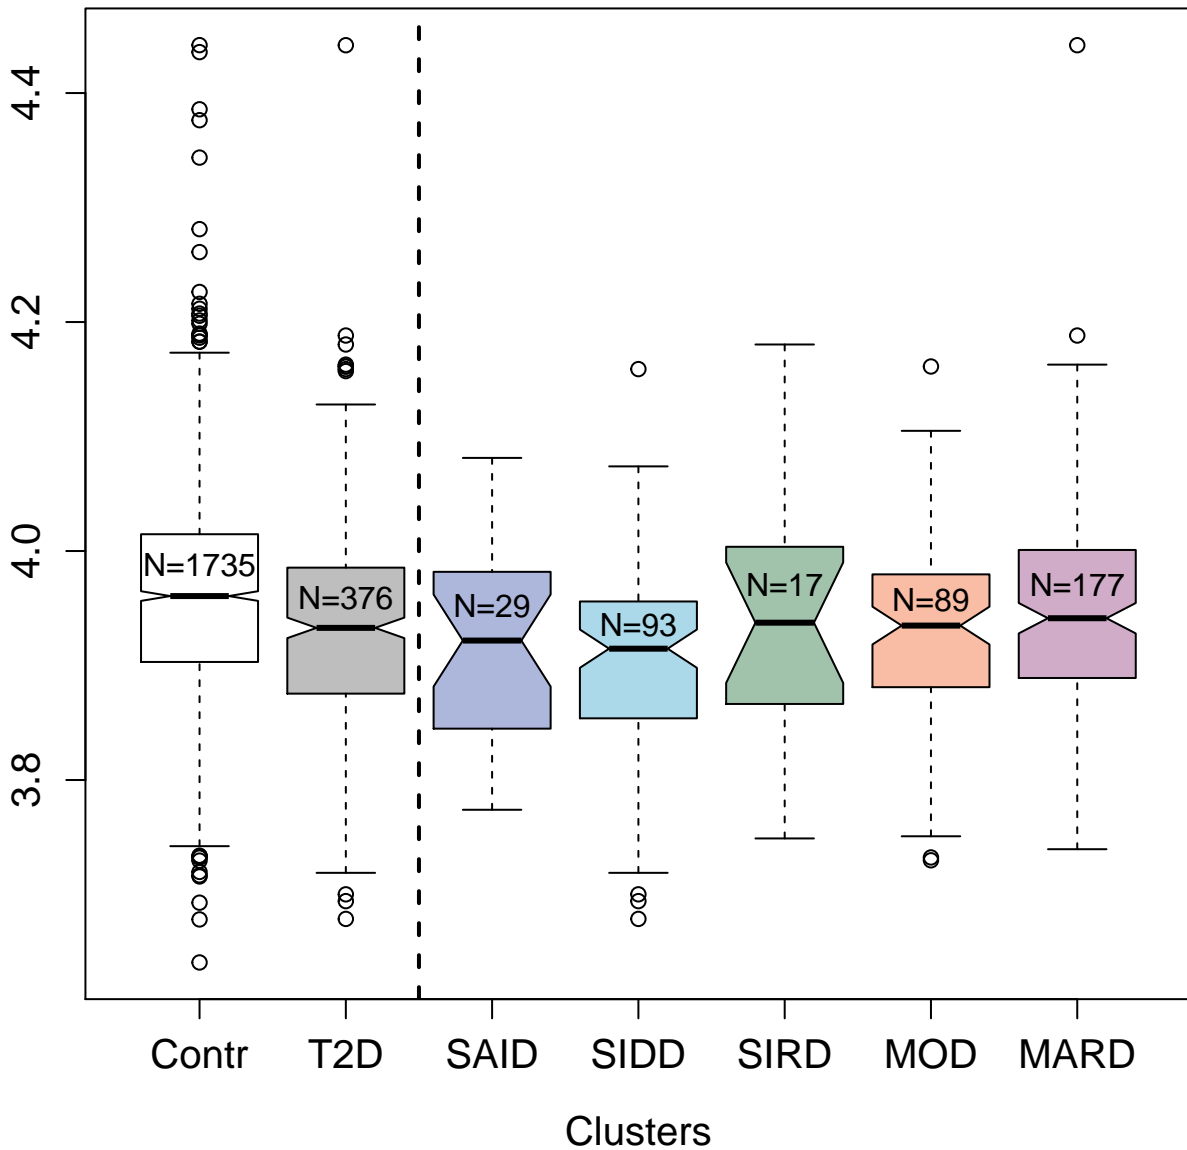

4154-57\_2 : P-selectin

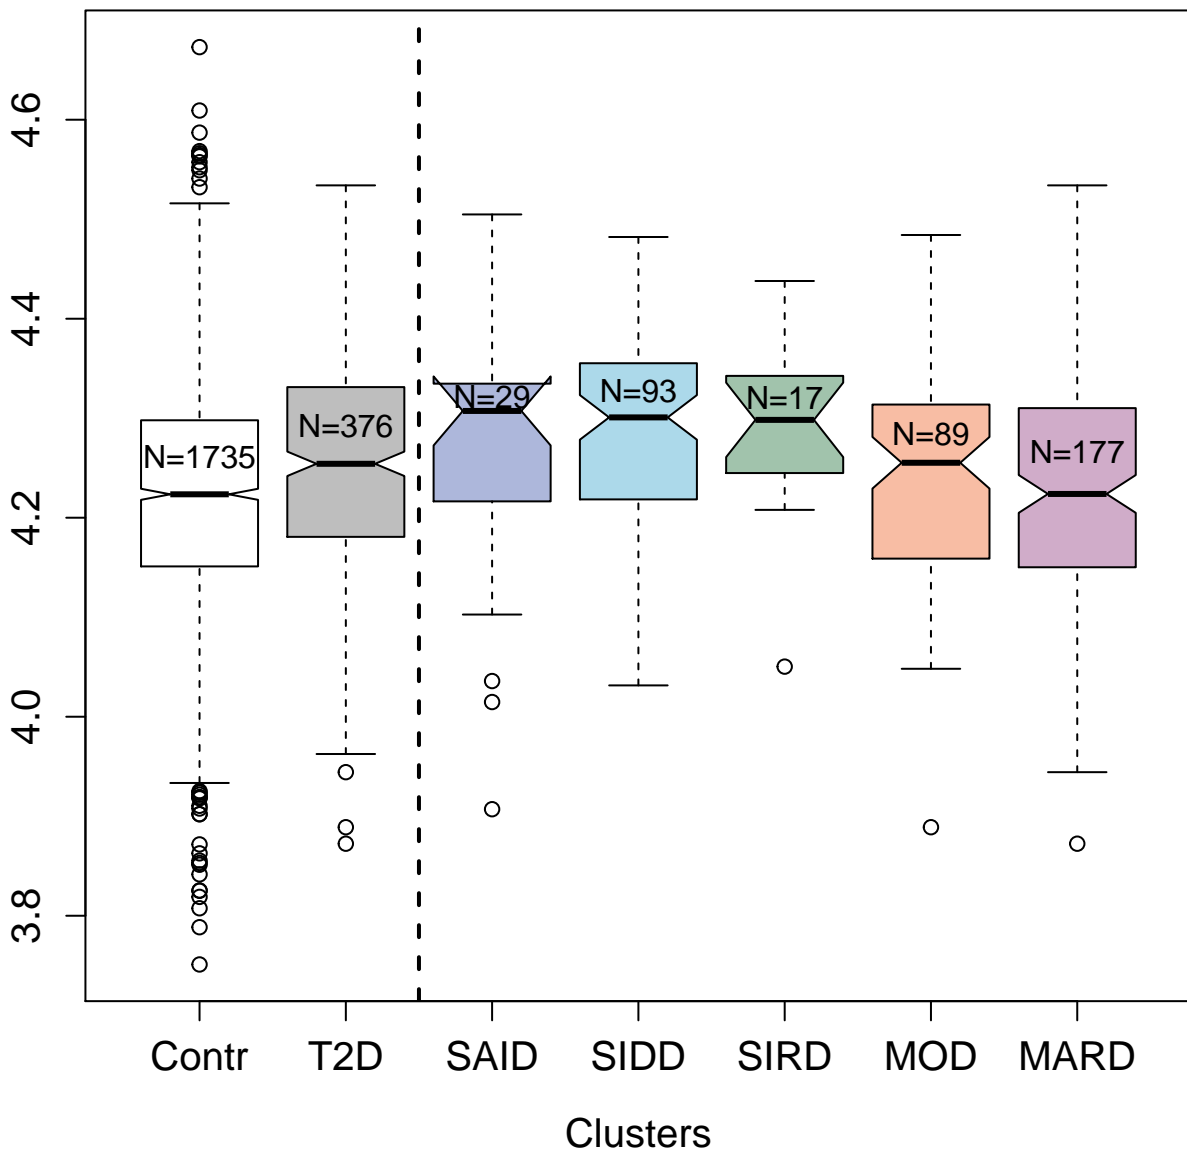

14583-49\_3 : Growth/differentiation factor 8

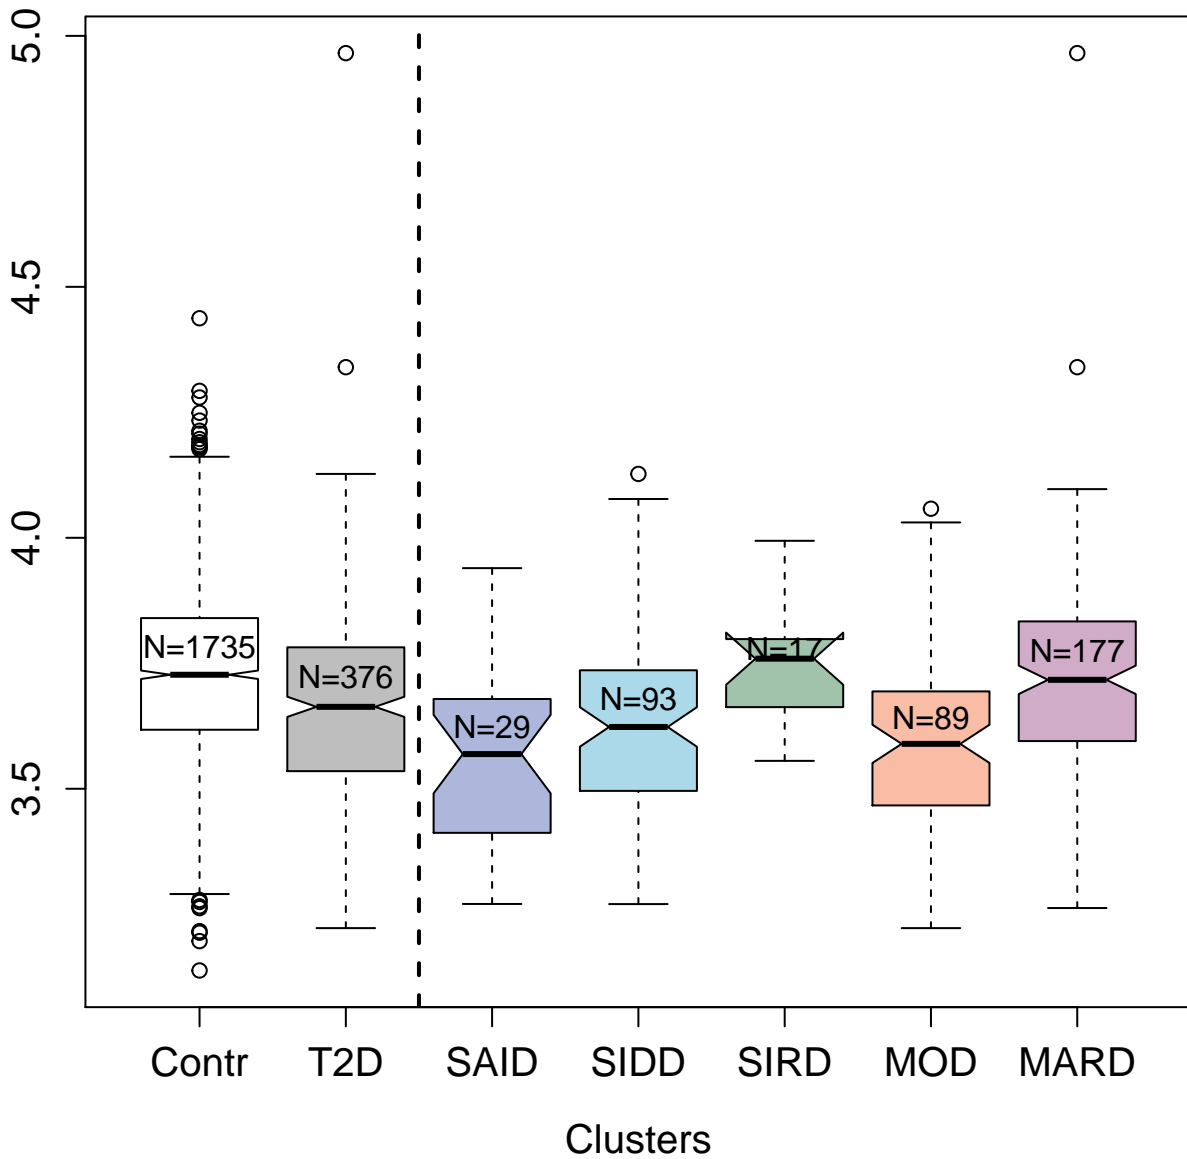

3448-13\_2 : Insulin receptor

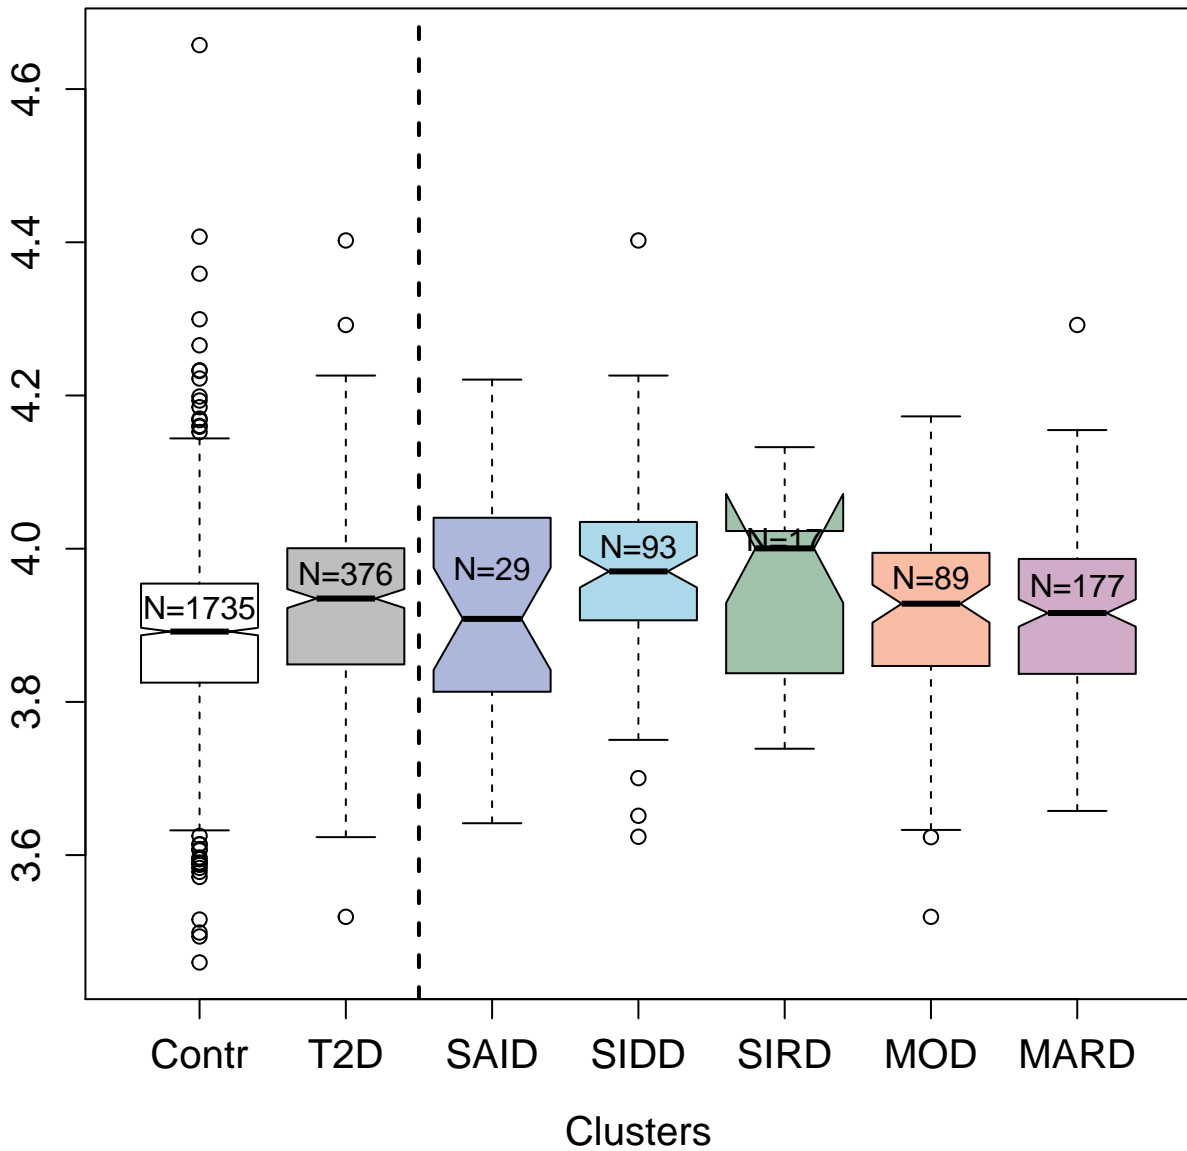

3325-2\_2 : Matrilin-2

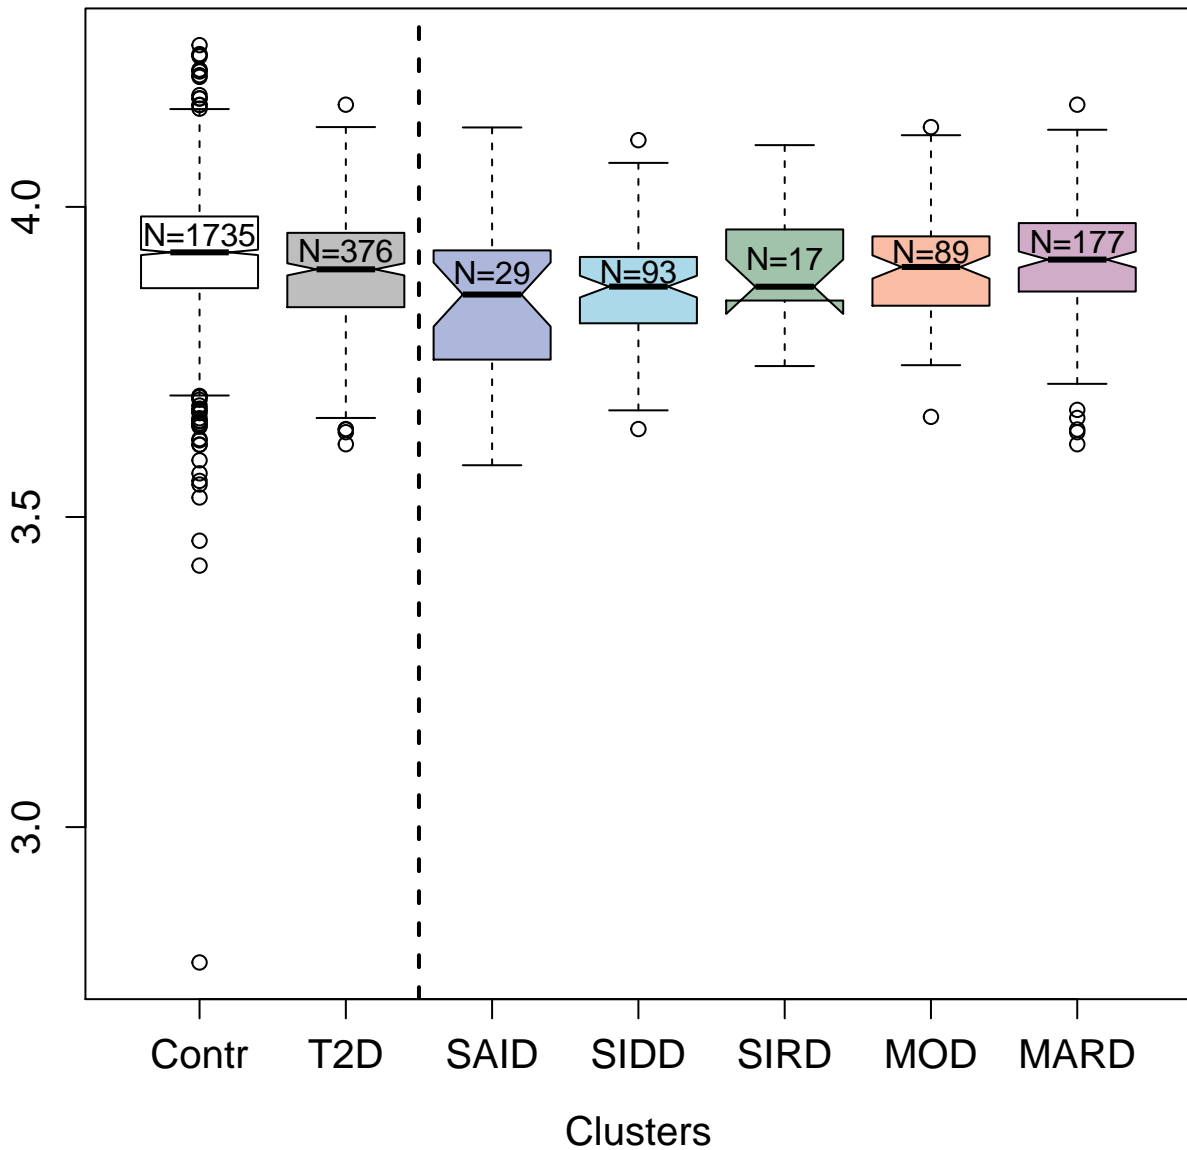

4237-70\_3 : Leucine carboxyl methyltransferase 1

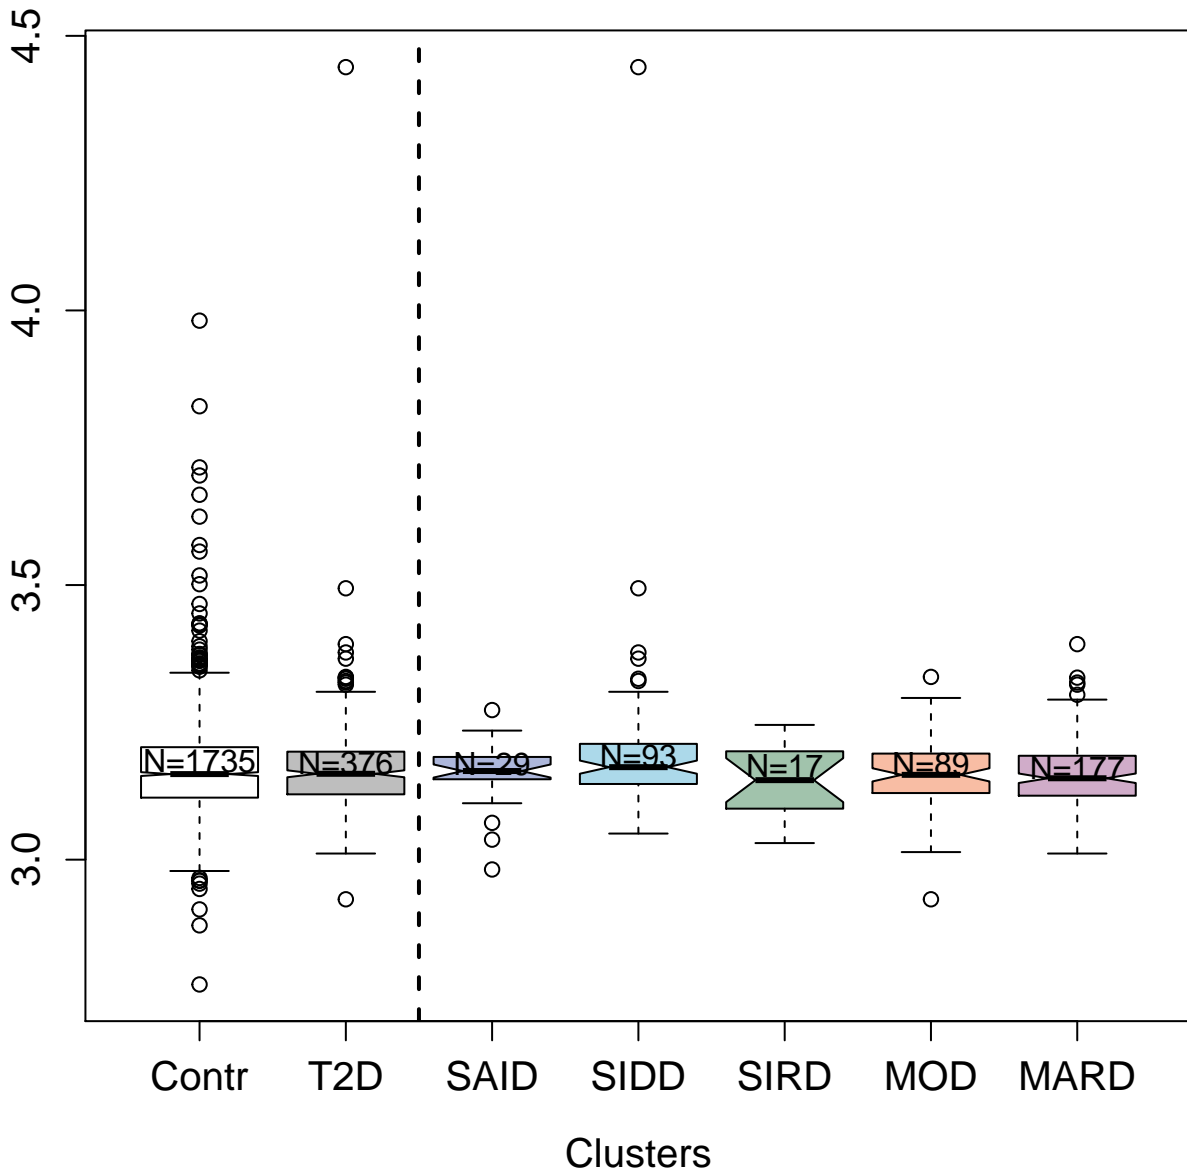



2706-69\_2 : Thyroxine-binding globulin

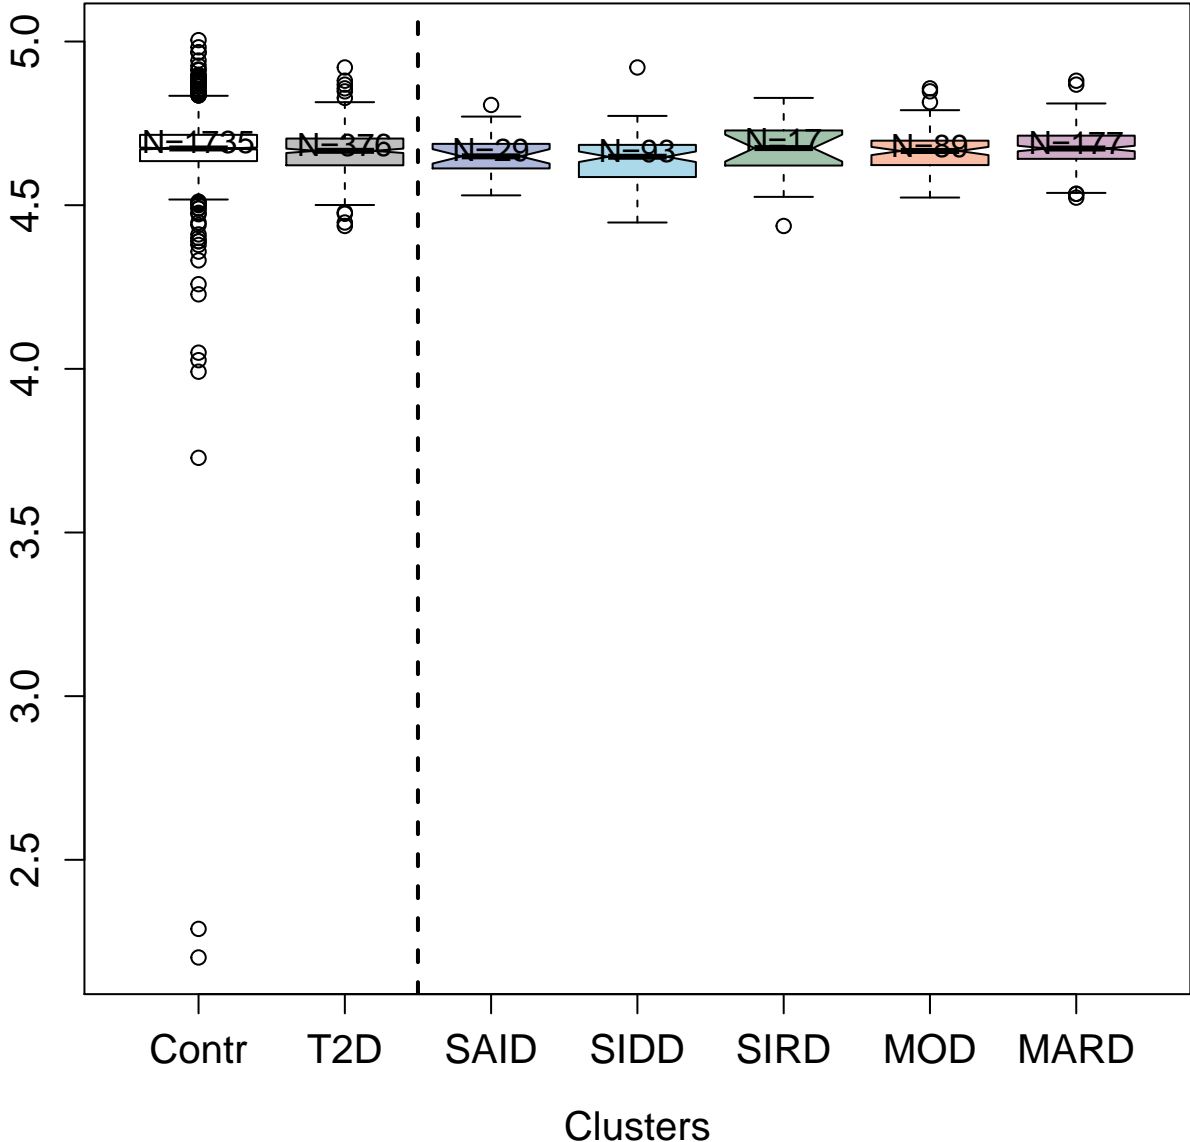

3707-12\_2: Serum albumin

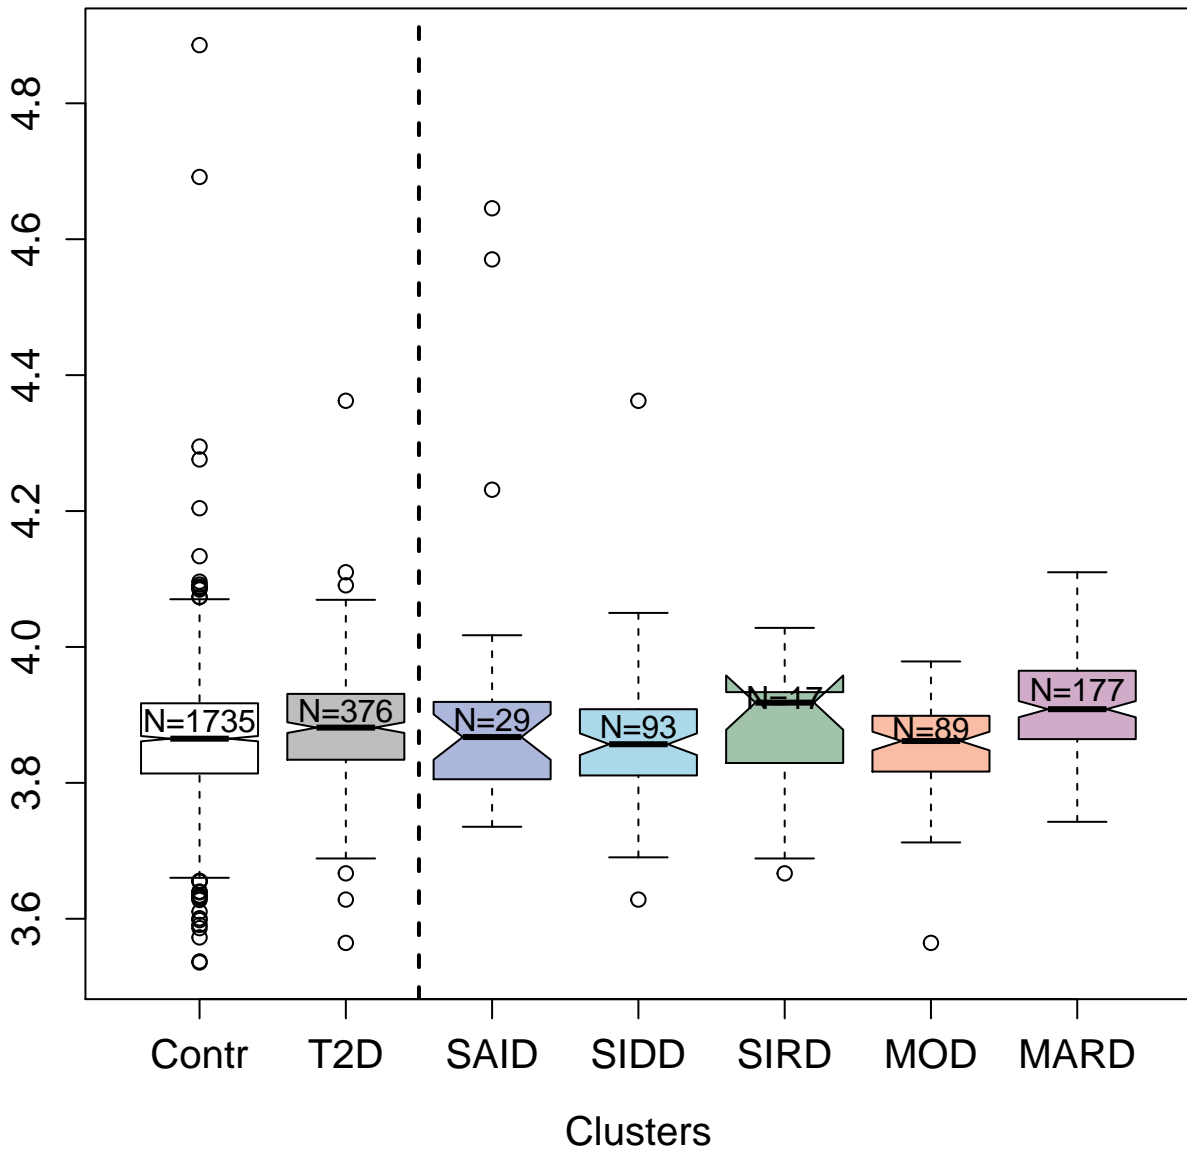

2765-4\_3 : Growth/differentiation factor 11/8

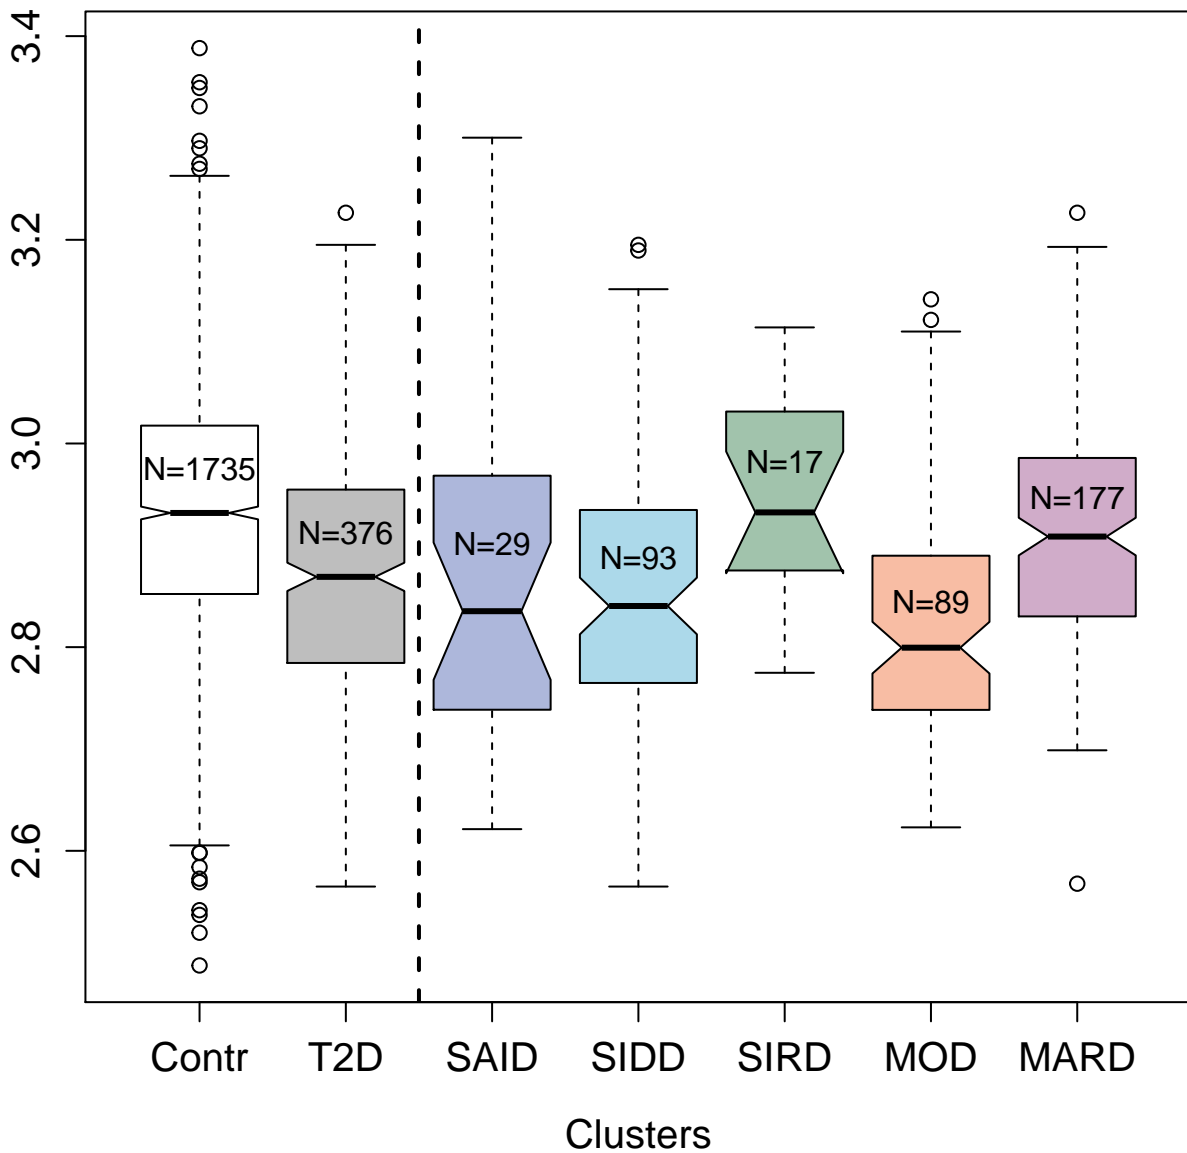

3331-8\_1 : RGM domain family member B

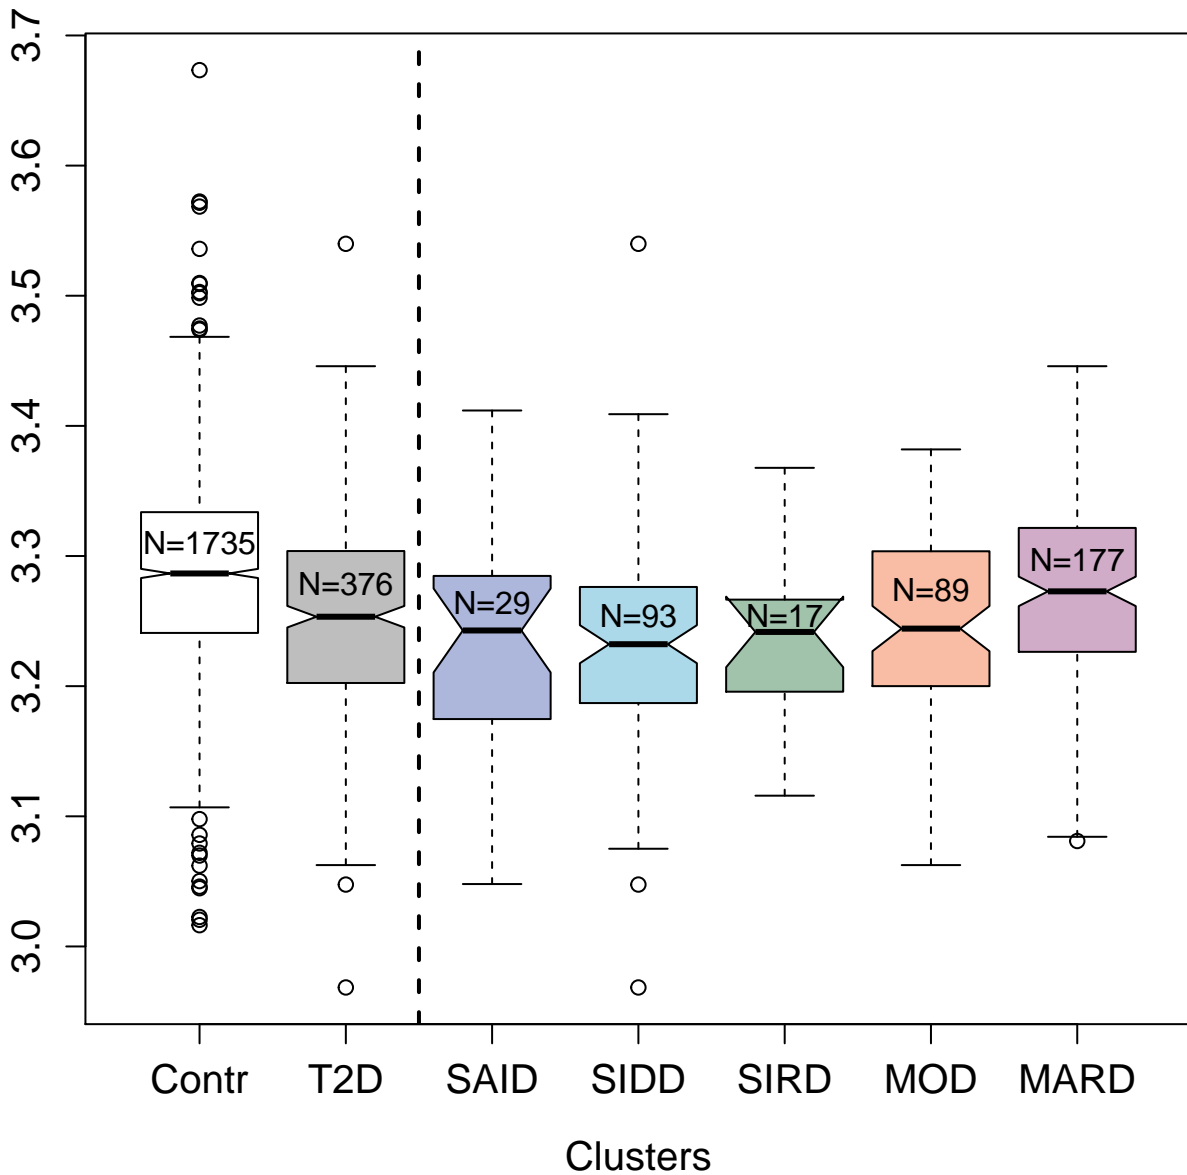

3234-23\_2 : Coiled-coil domain-containing protein

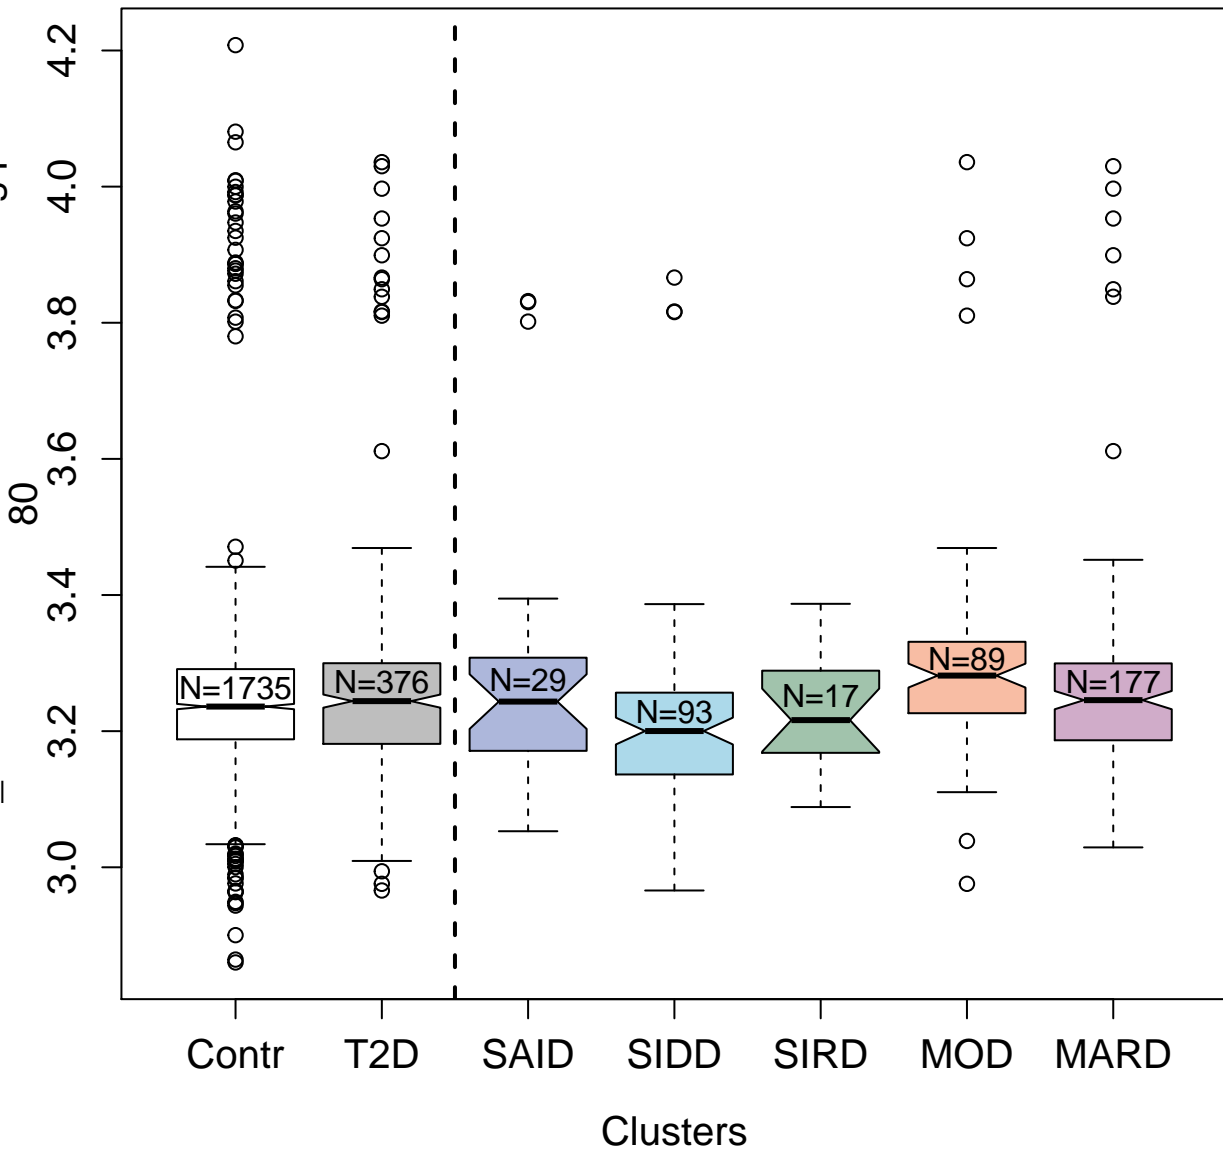

5077-28\_3 : Ephrin type-B receptor 2

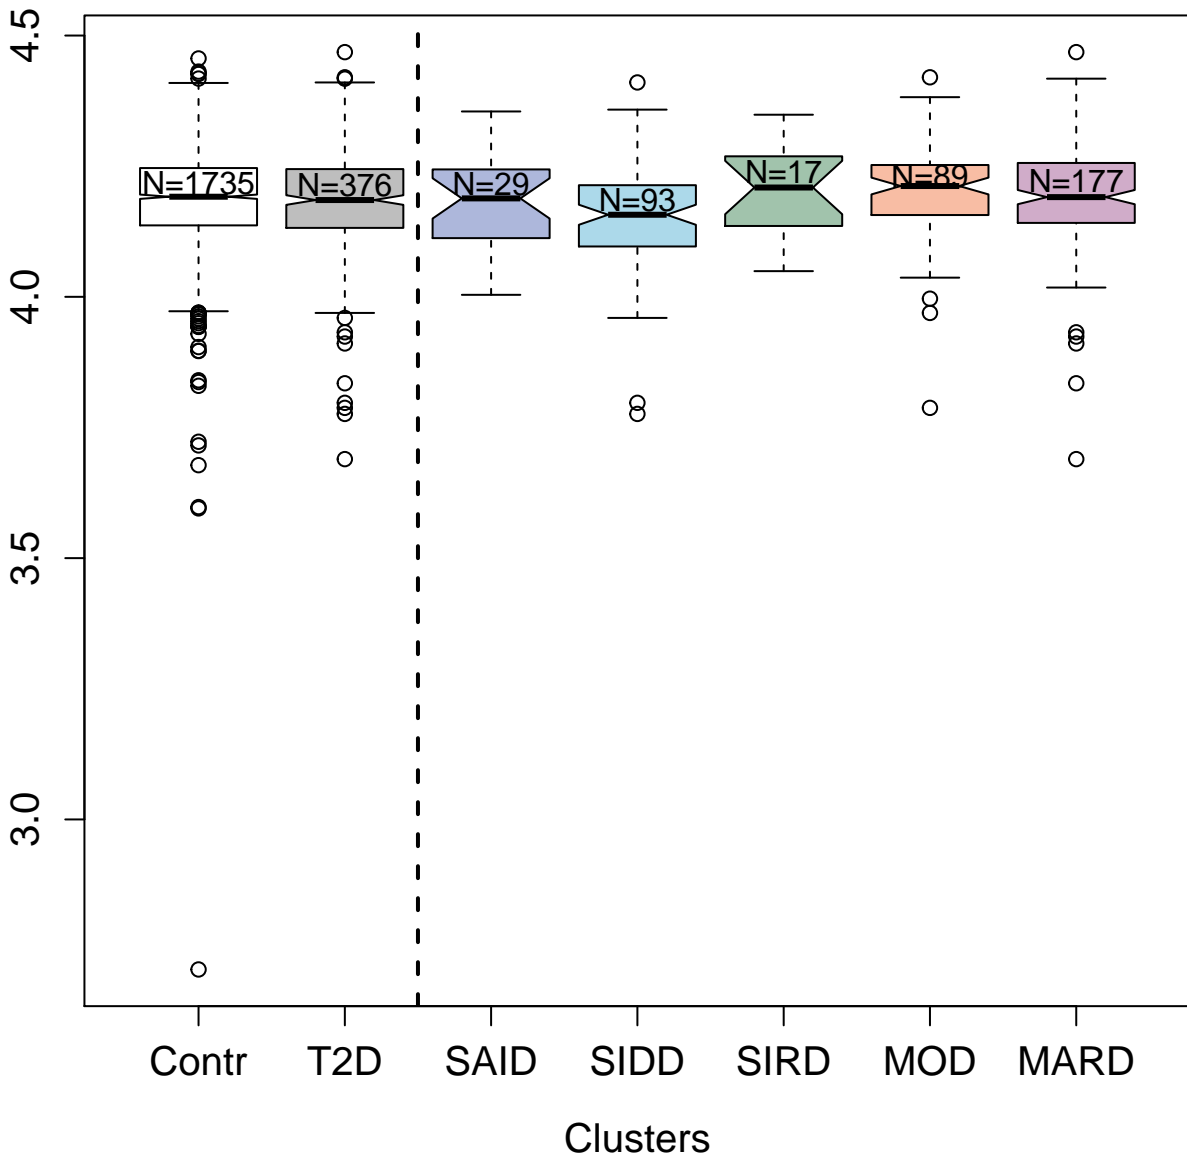

3396-54\_2 : Renin

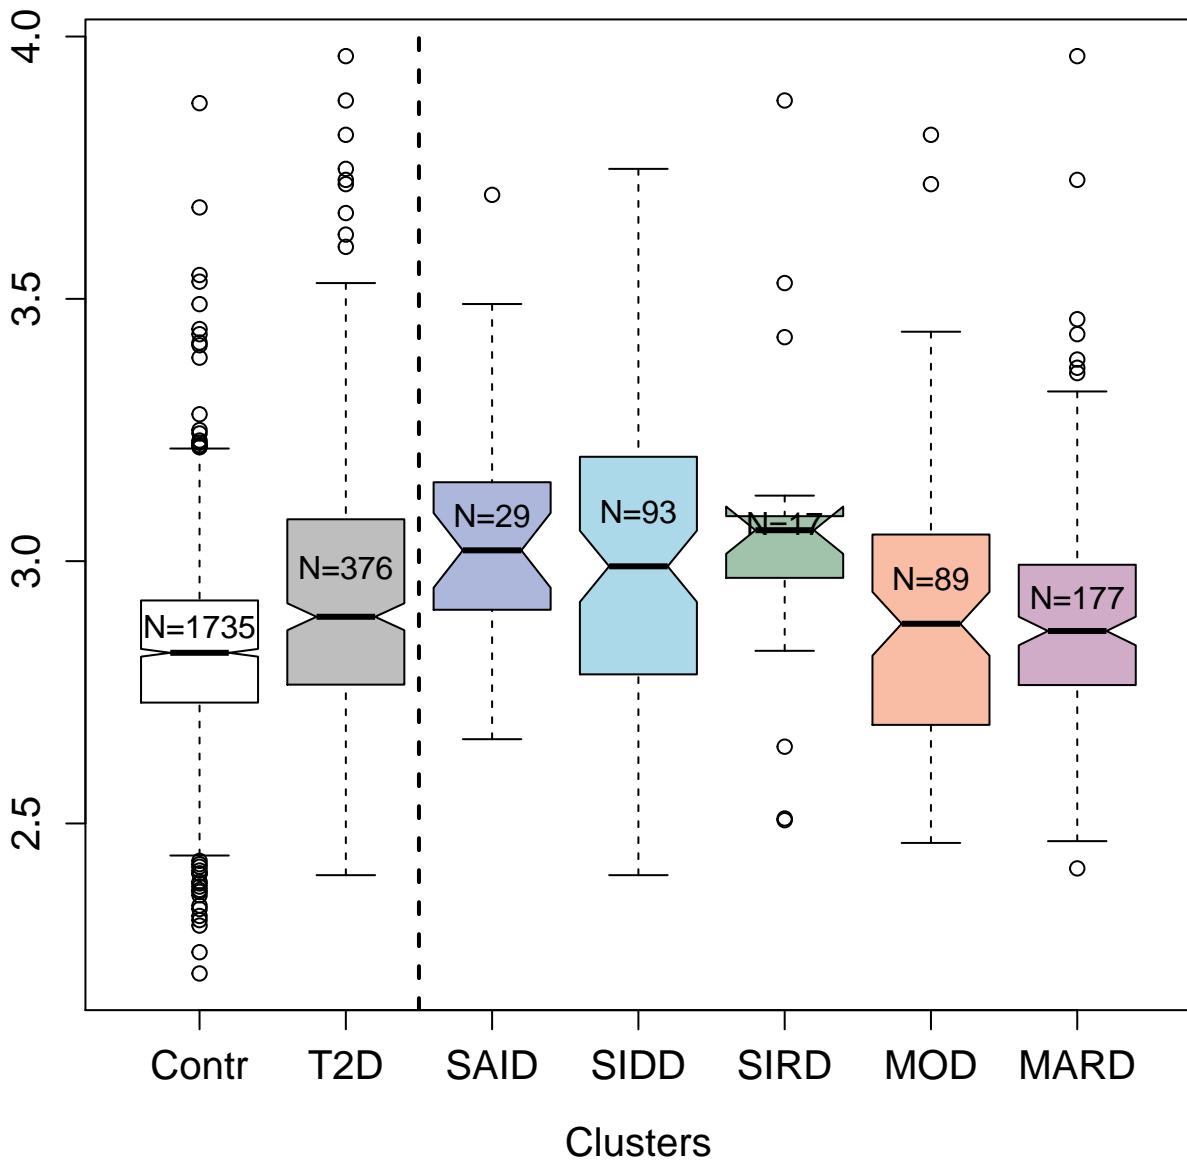

5069-9\_3 : Complement decay-accelerating factor

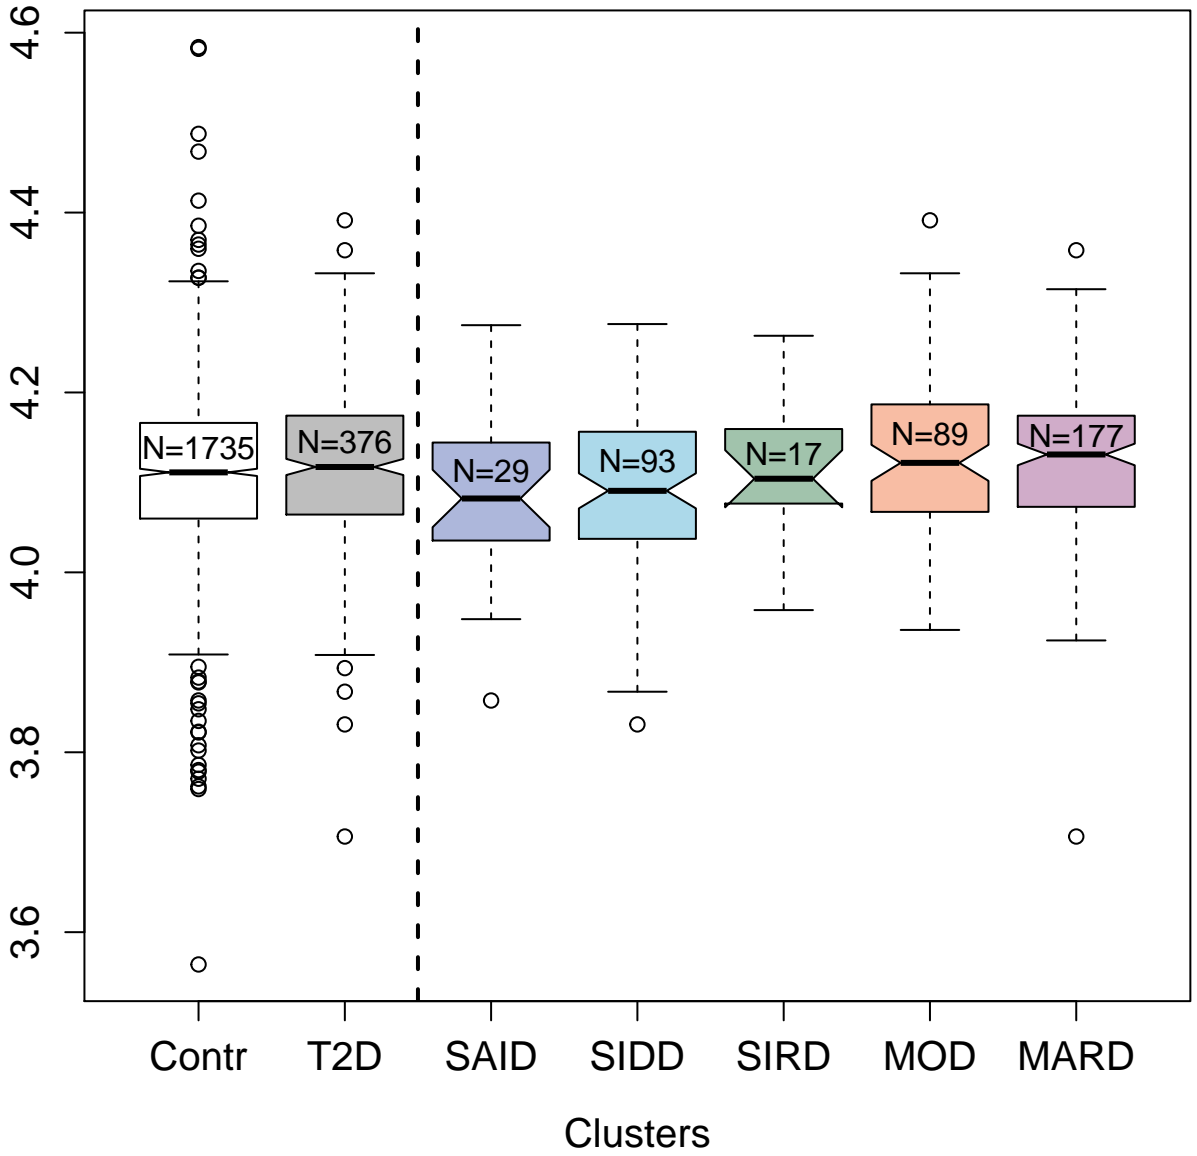



2515-14\_3 : GDNF family receptor alpha-2

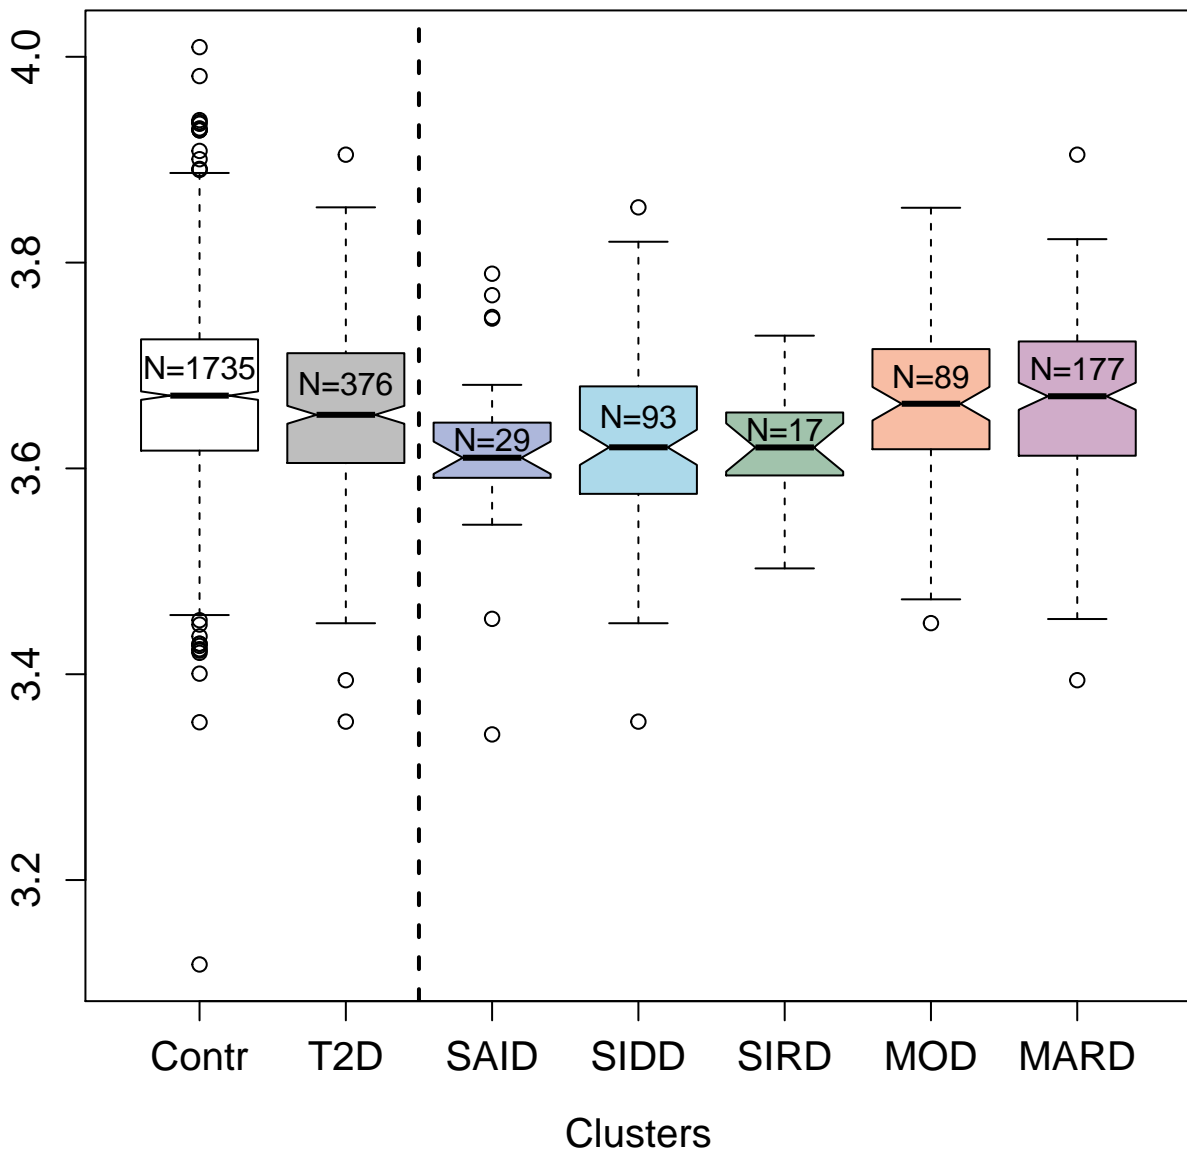

8465-52\_3 : Cathepsin H

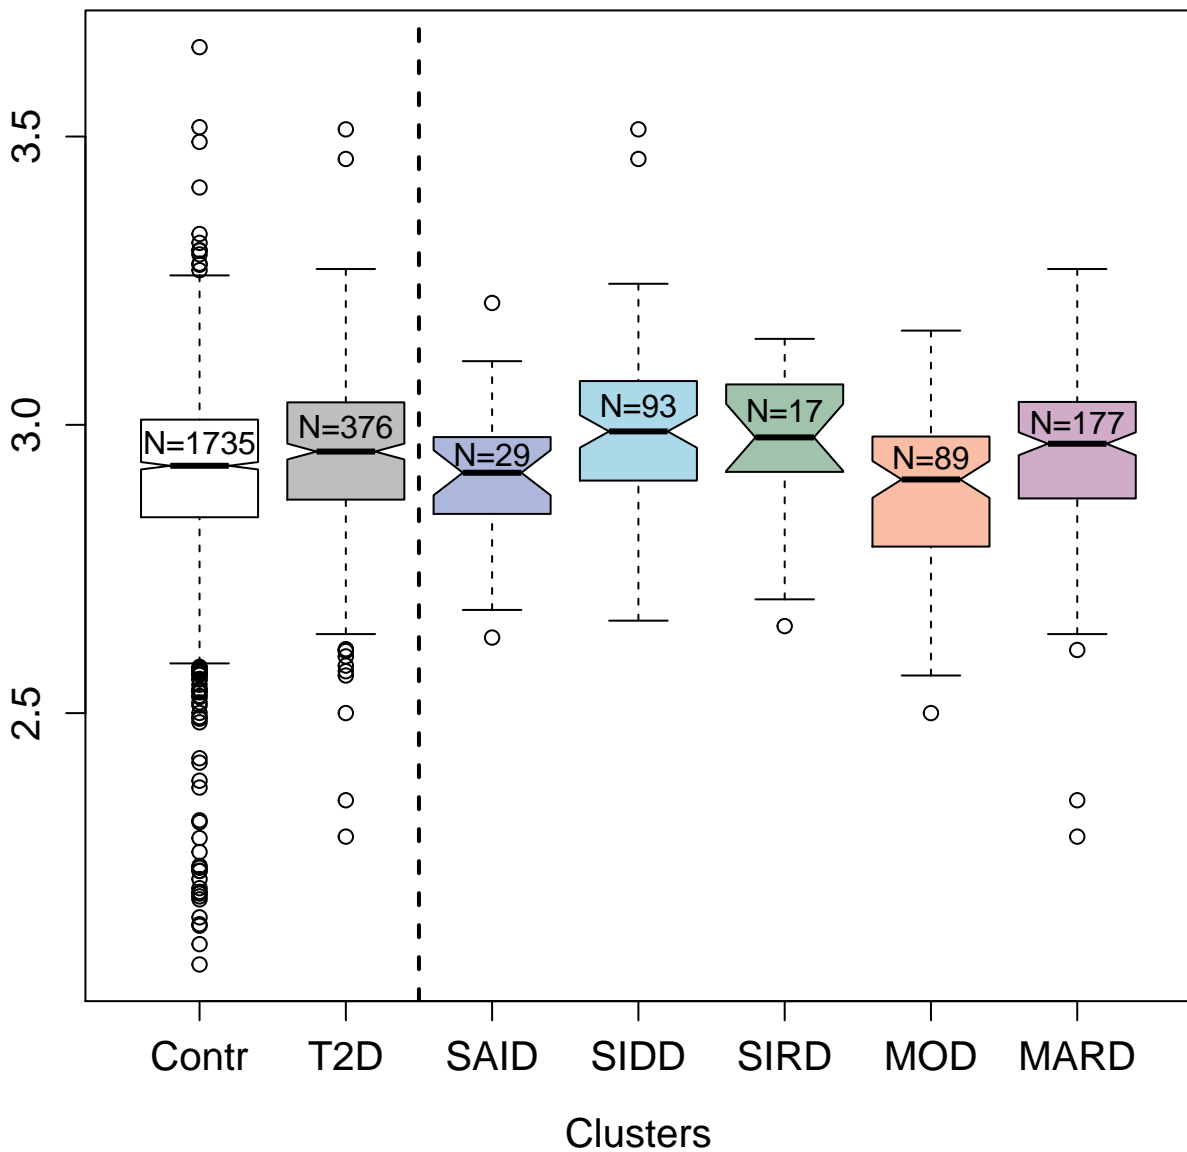

3378-49\_2 : Kallikrein-7

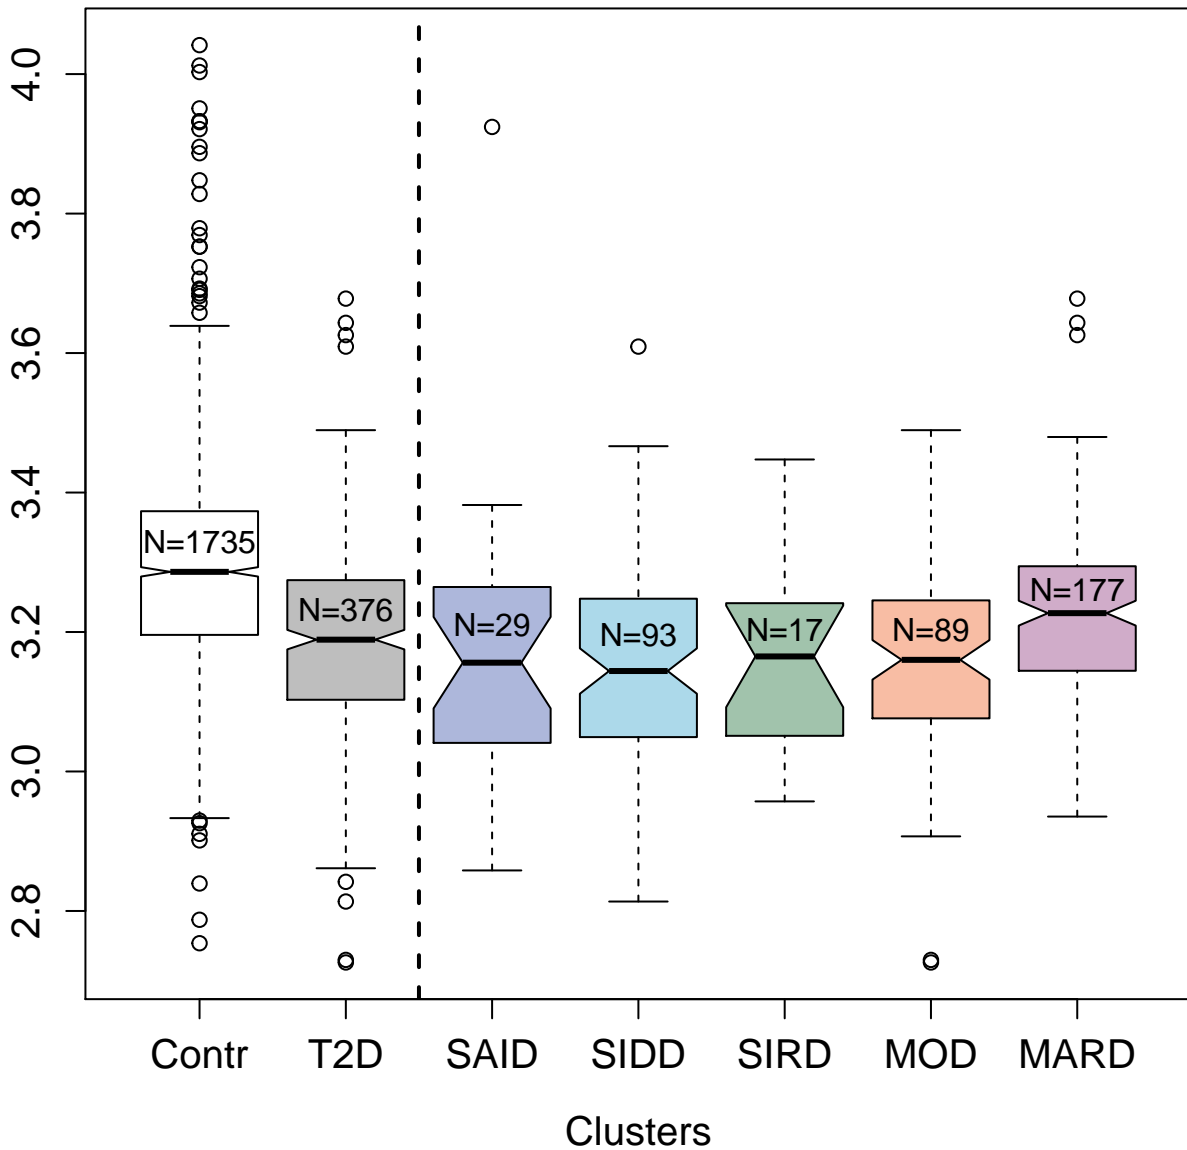

3376-49\_2 : Interleukin-17 receptor D

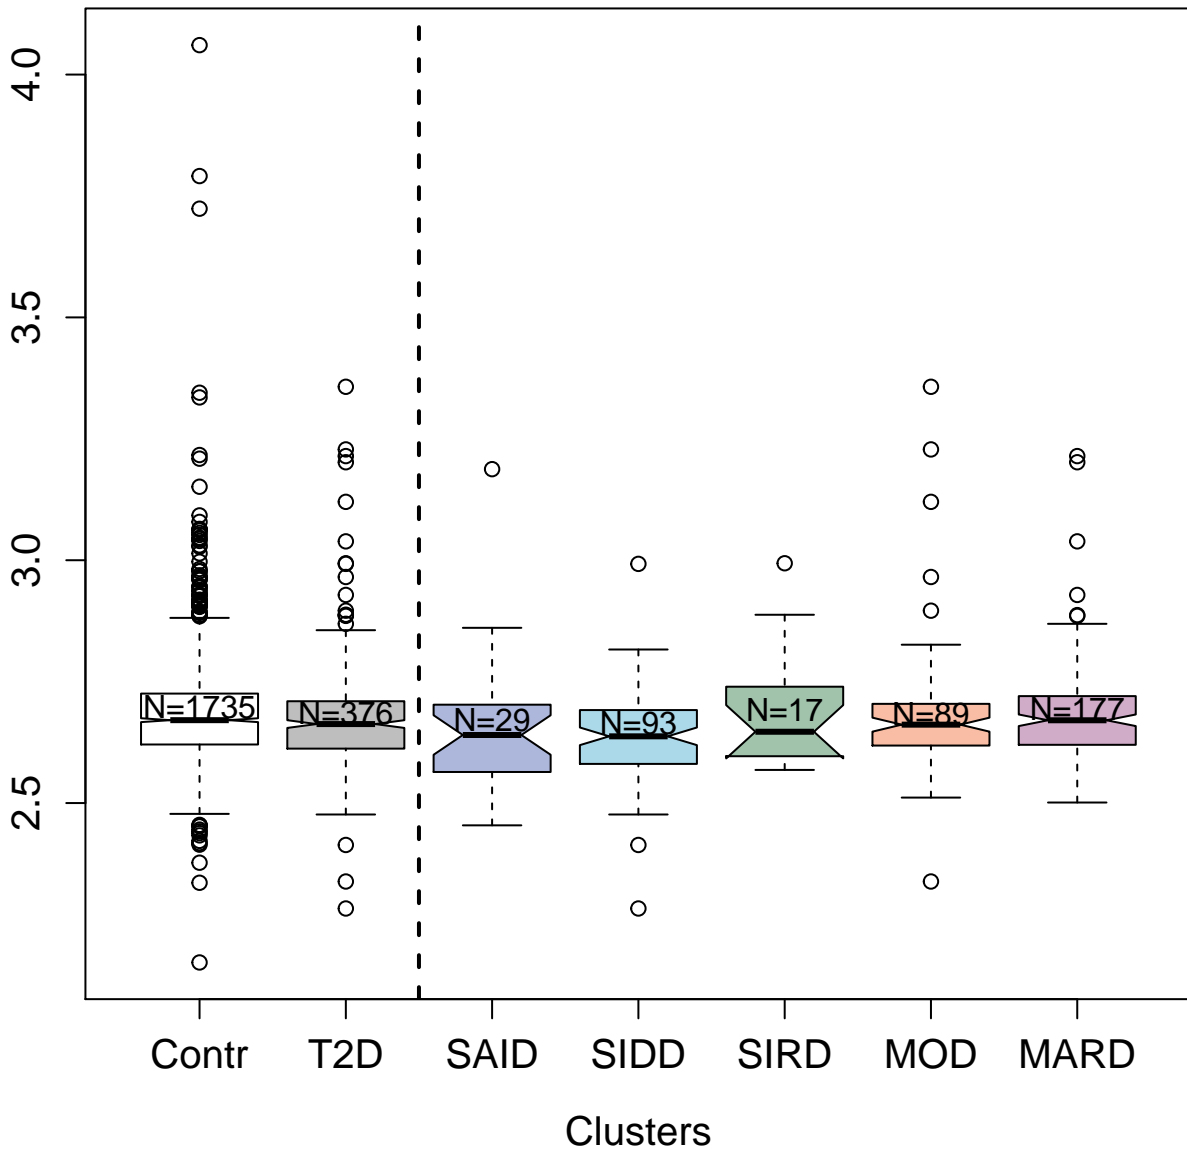

14114-18\_3 : PILR alpha-associated neural protein

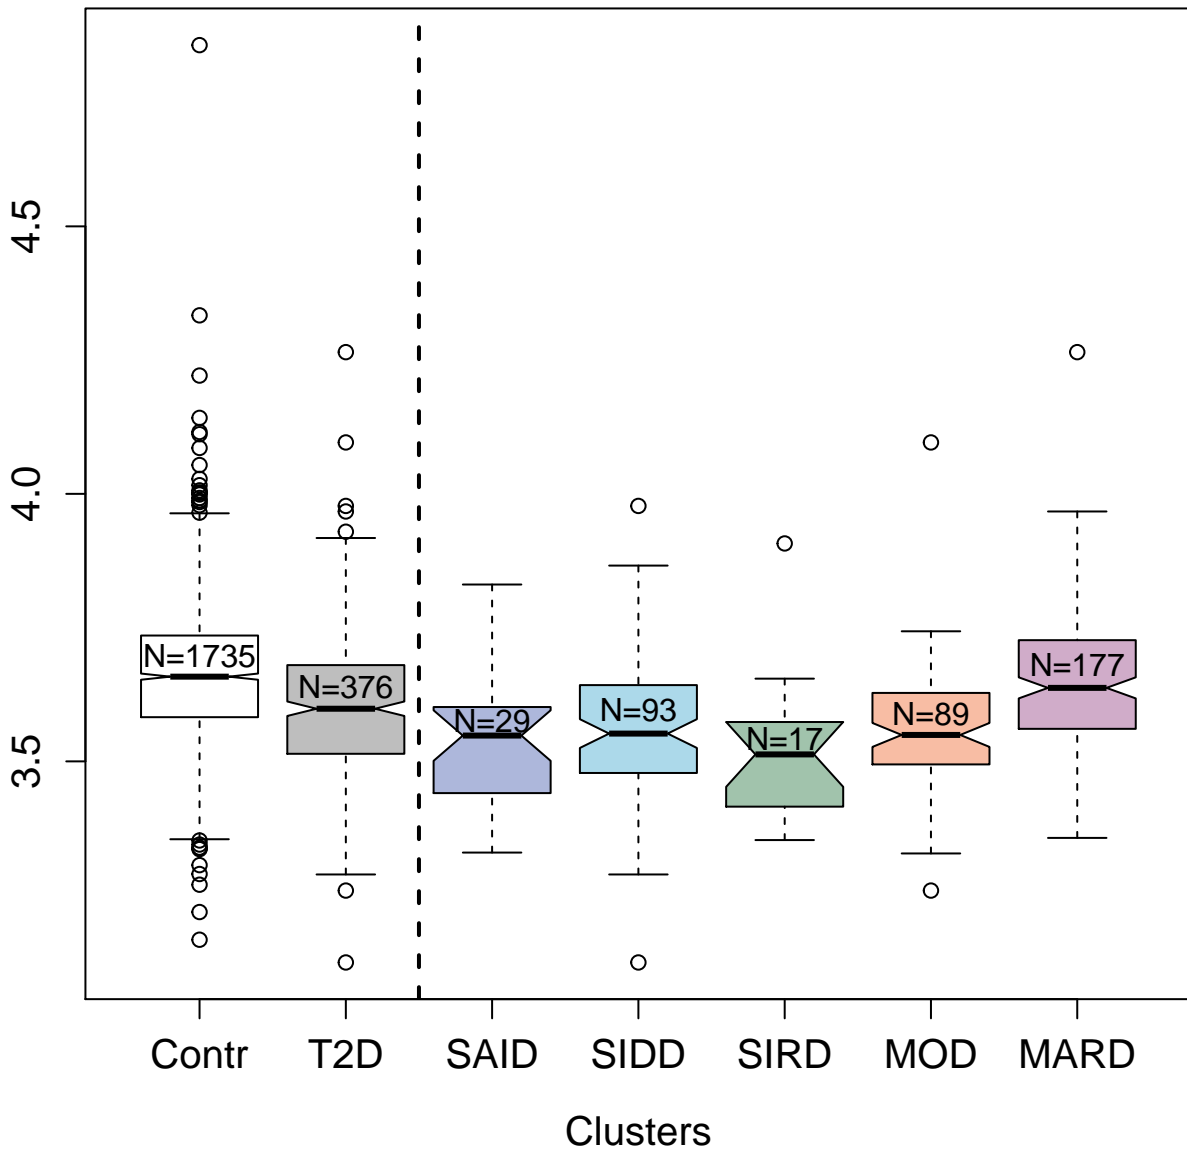

4498-62\_2 : Neural cell adhesion molecule 1; 120

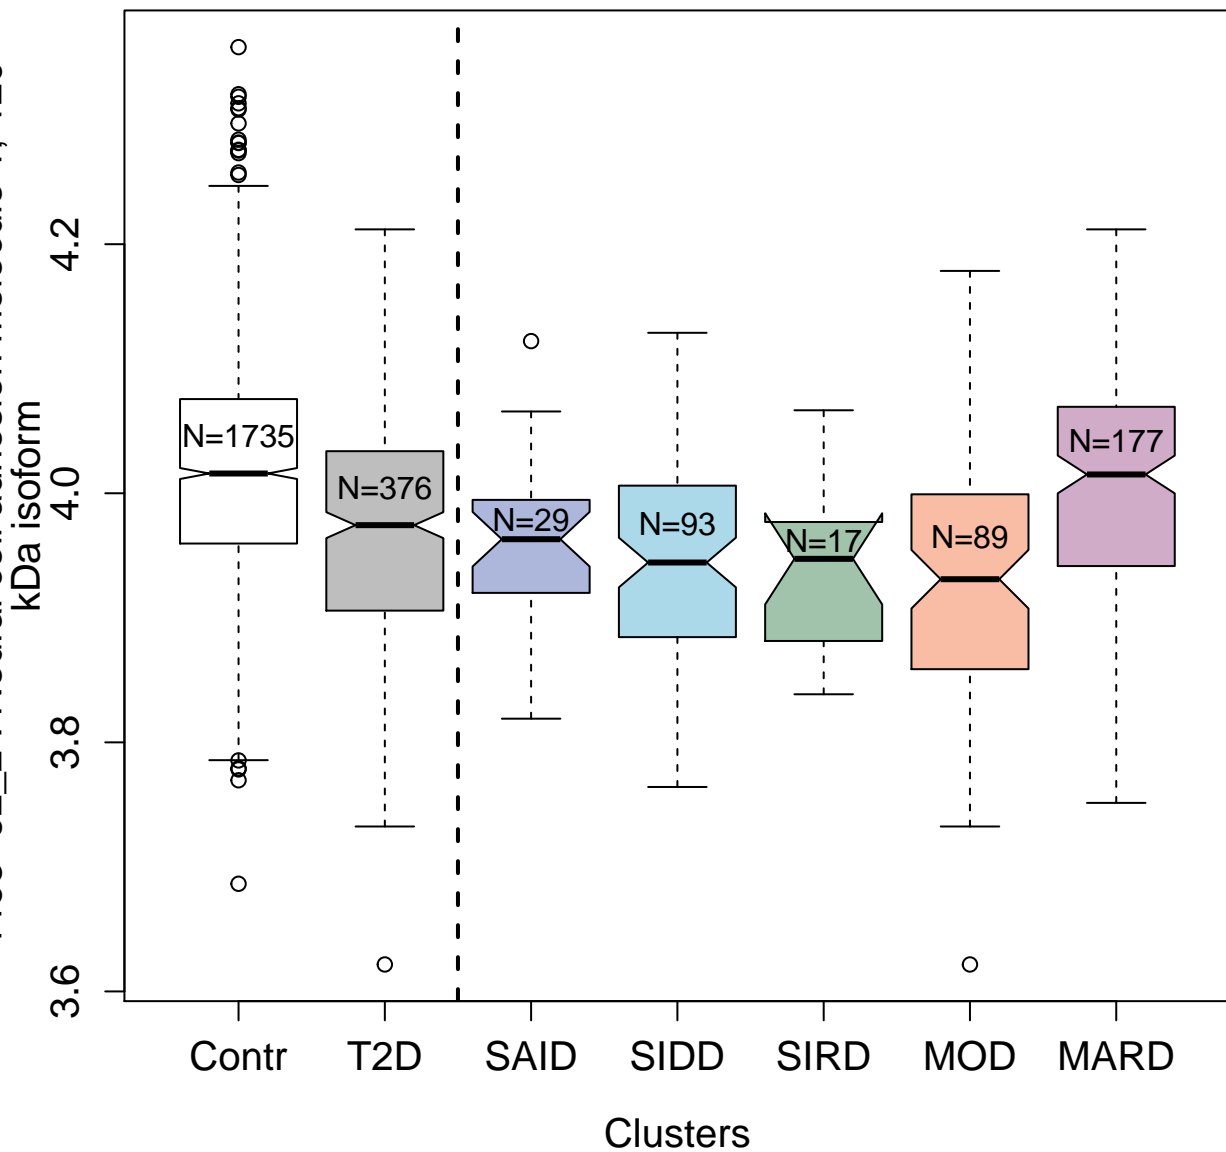

2949-6\_2 : Group 10 secretory phospholipase A2

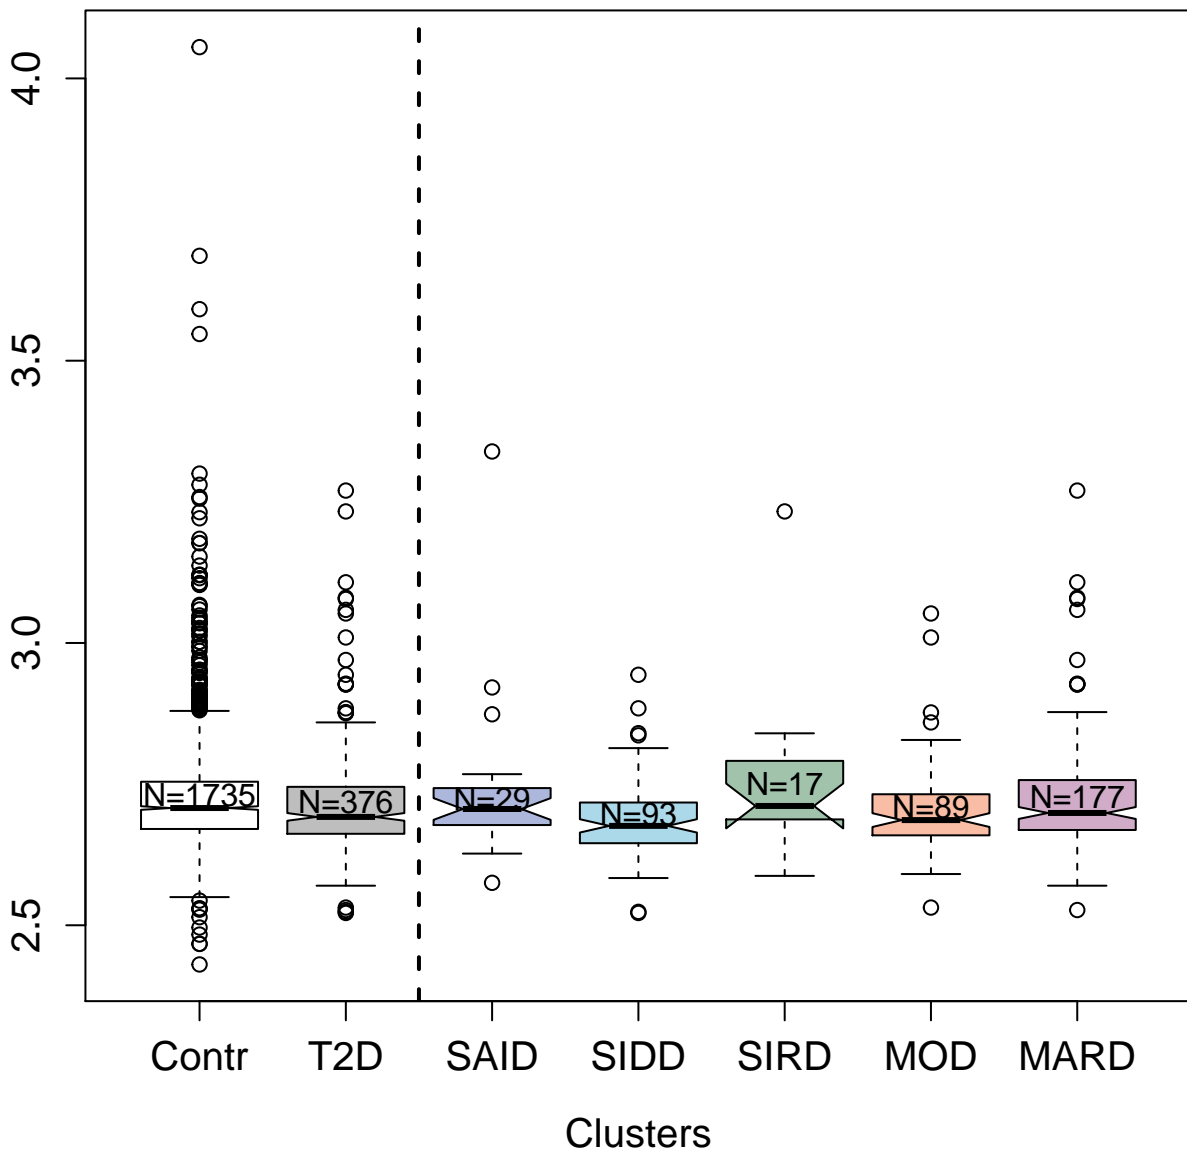

2991-9\_2 : Interleukin-1 receptor type 1

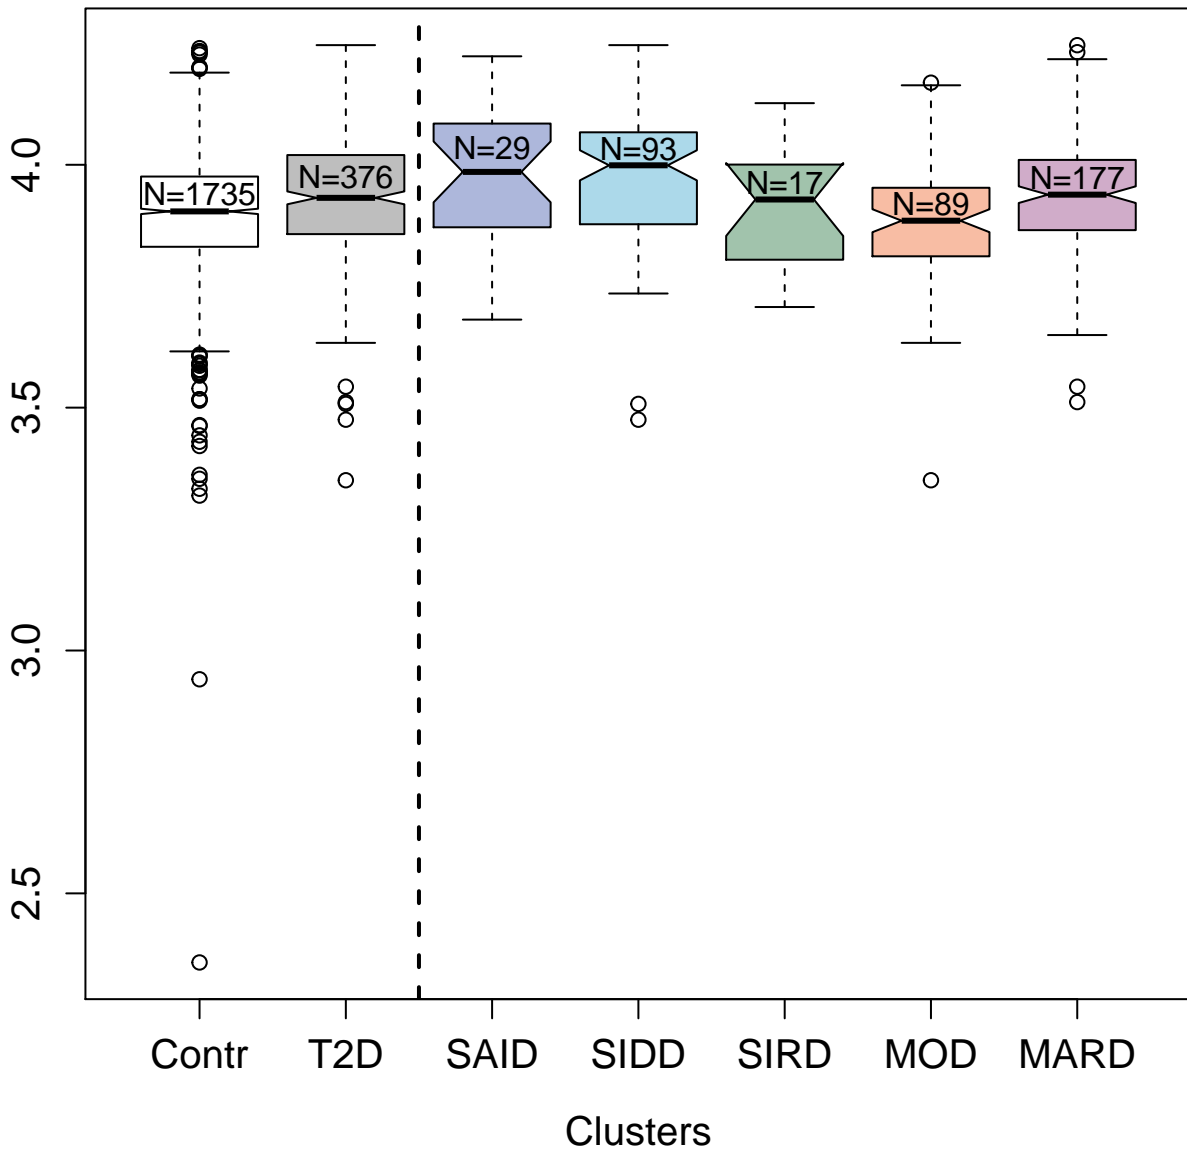



3045-72\_2 : Pleiotrophin

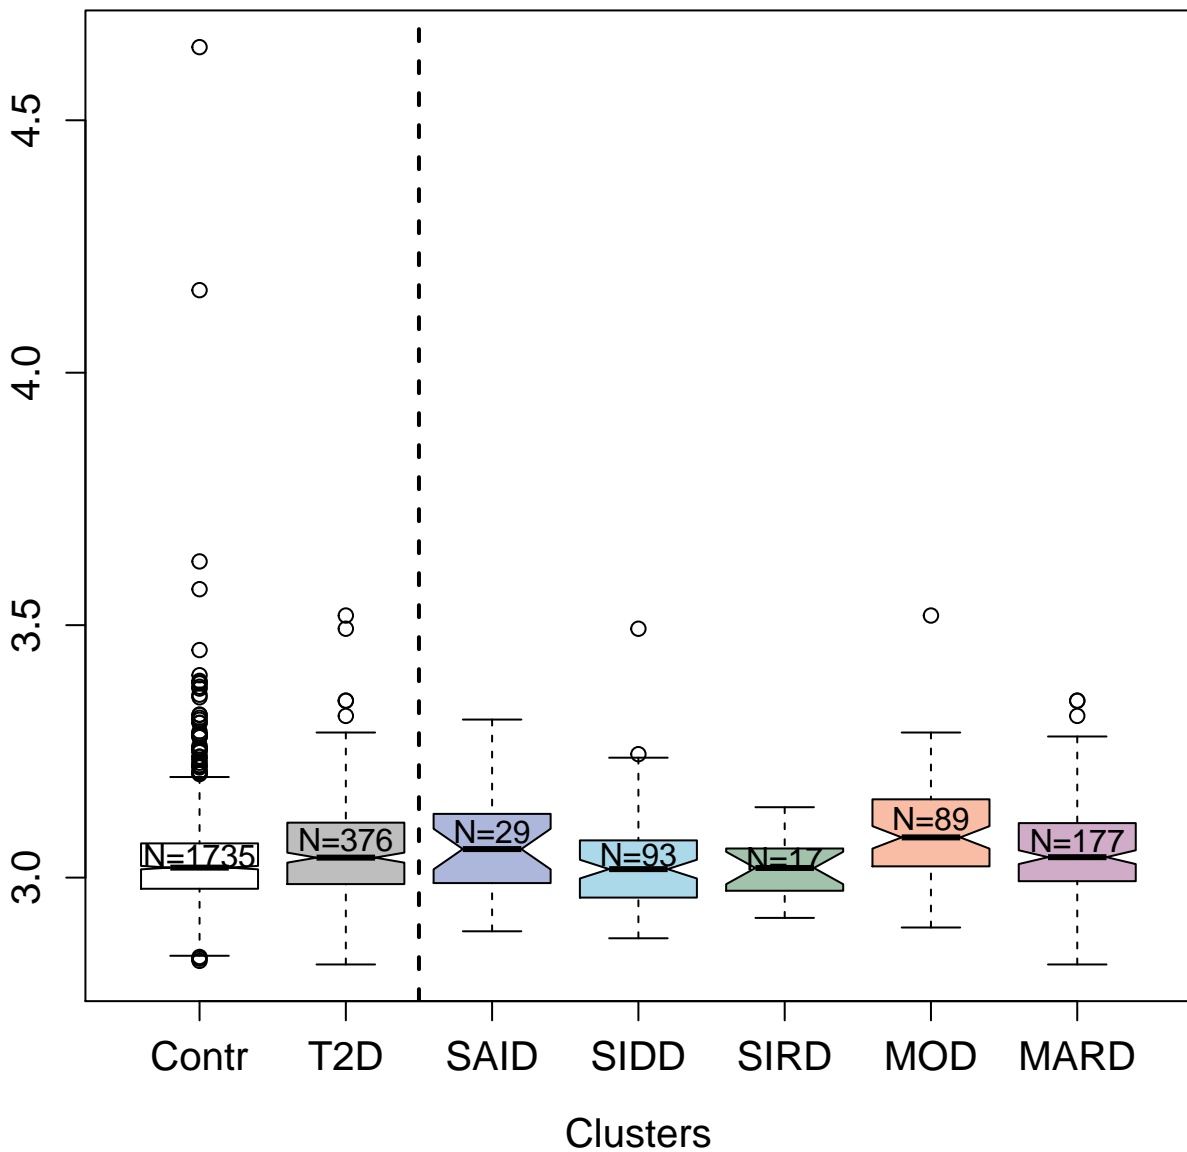

13122-19\_3 : Leucine-rich repeat transmembrane protein FLRT2

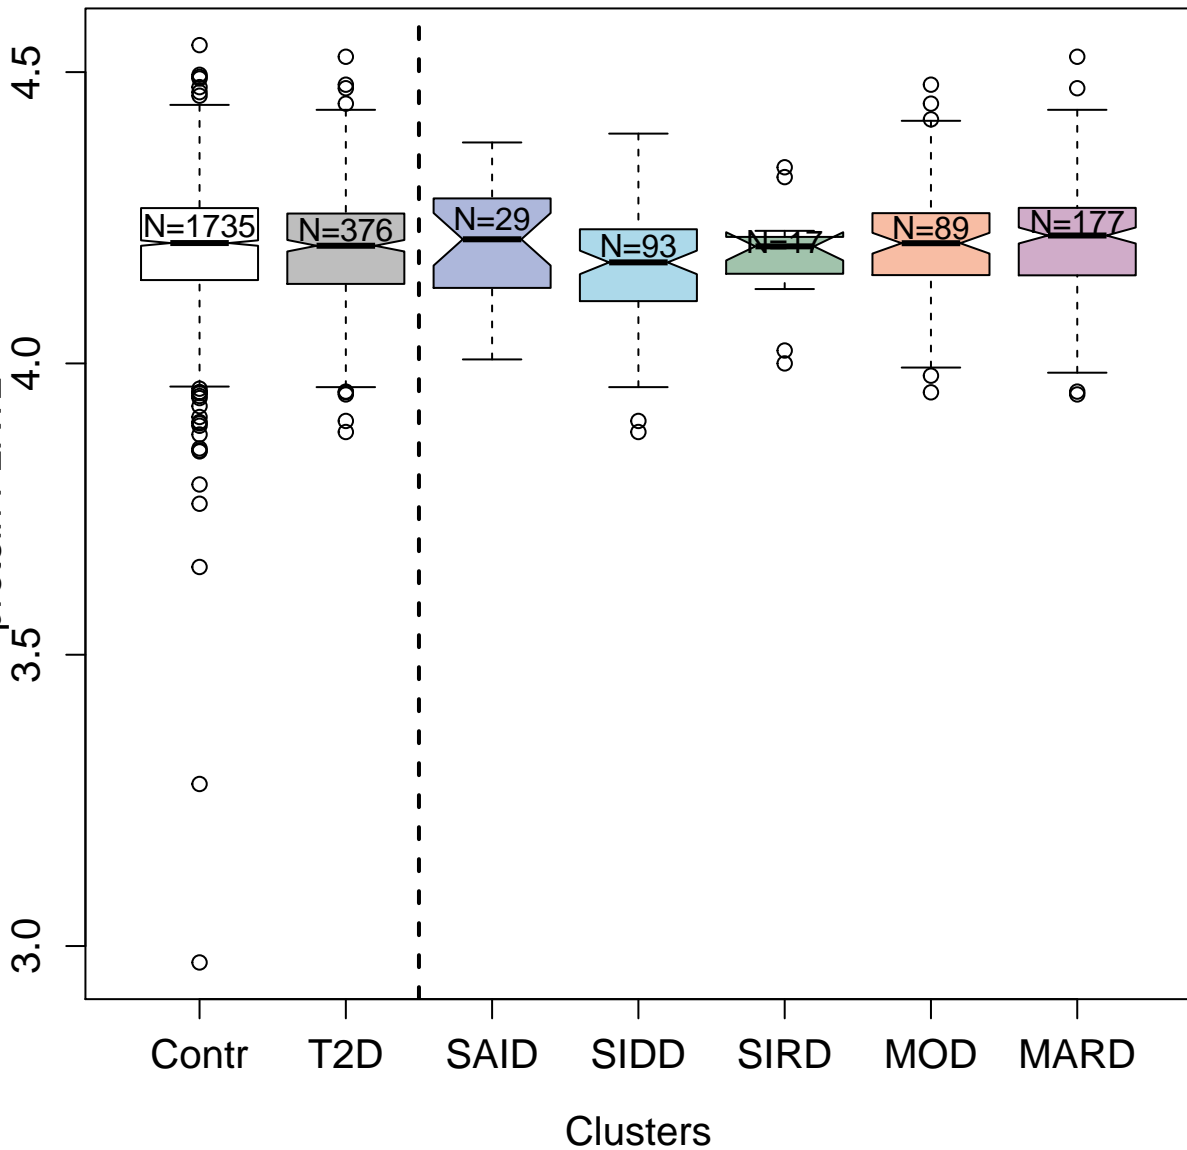

14125-5\_3 : Apolipoprotein M

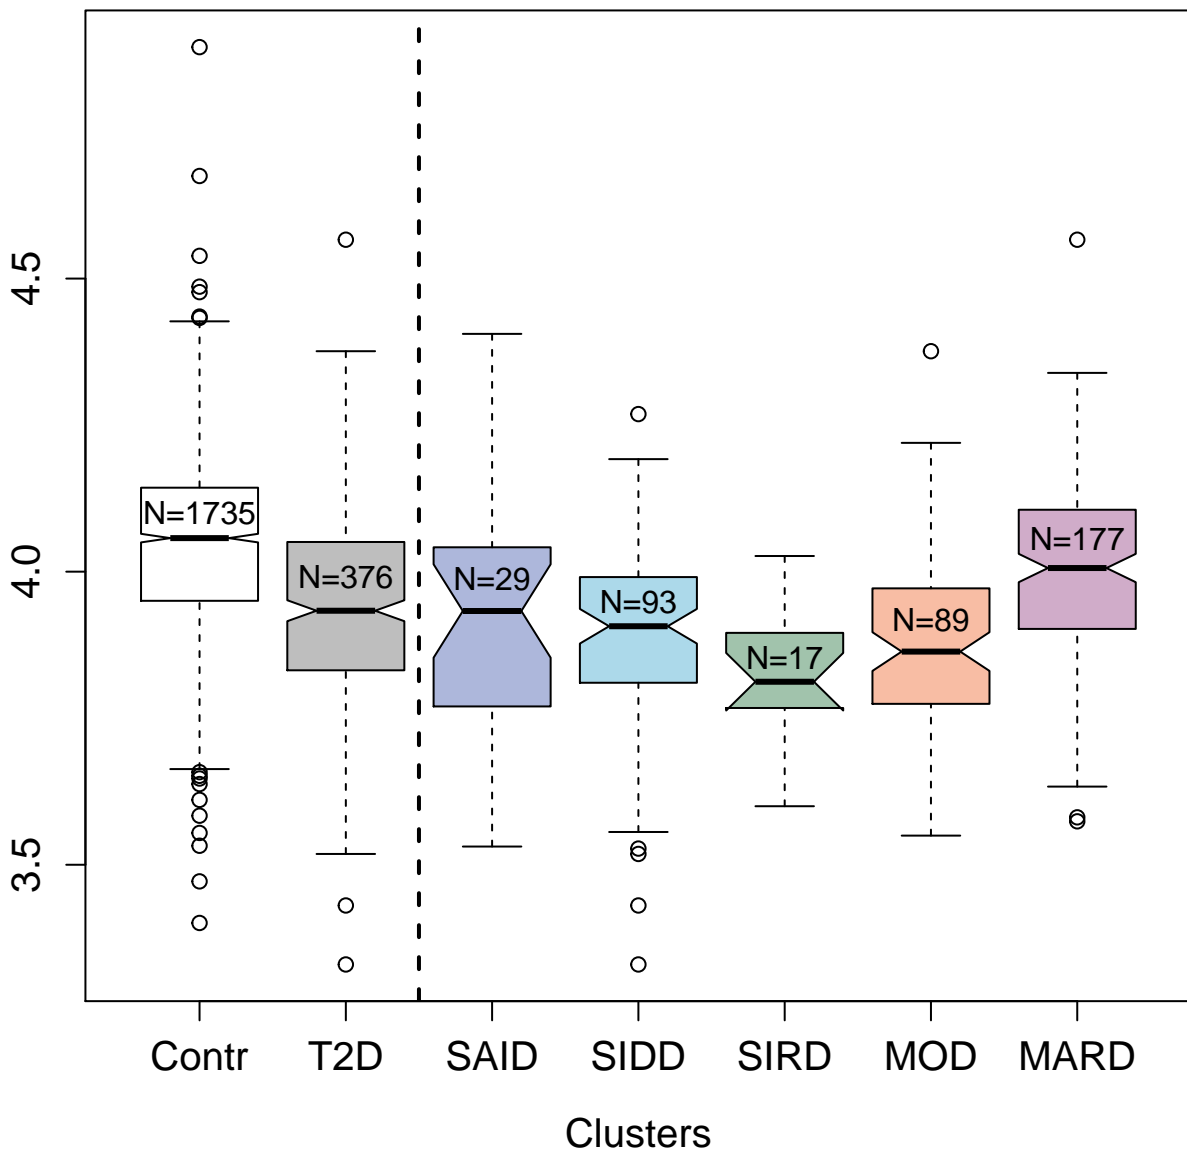

4763-31\_3 : Afamin

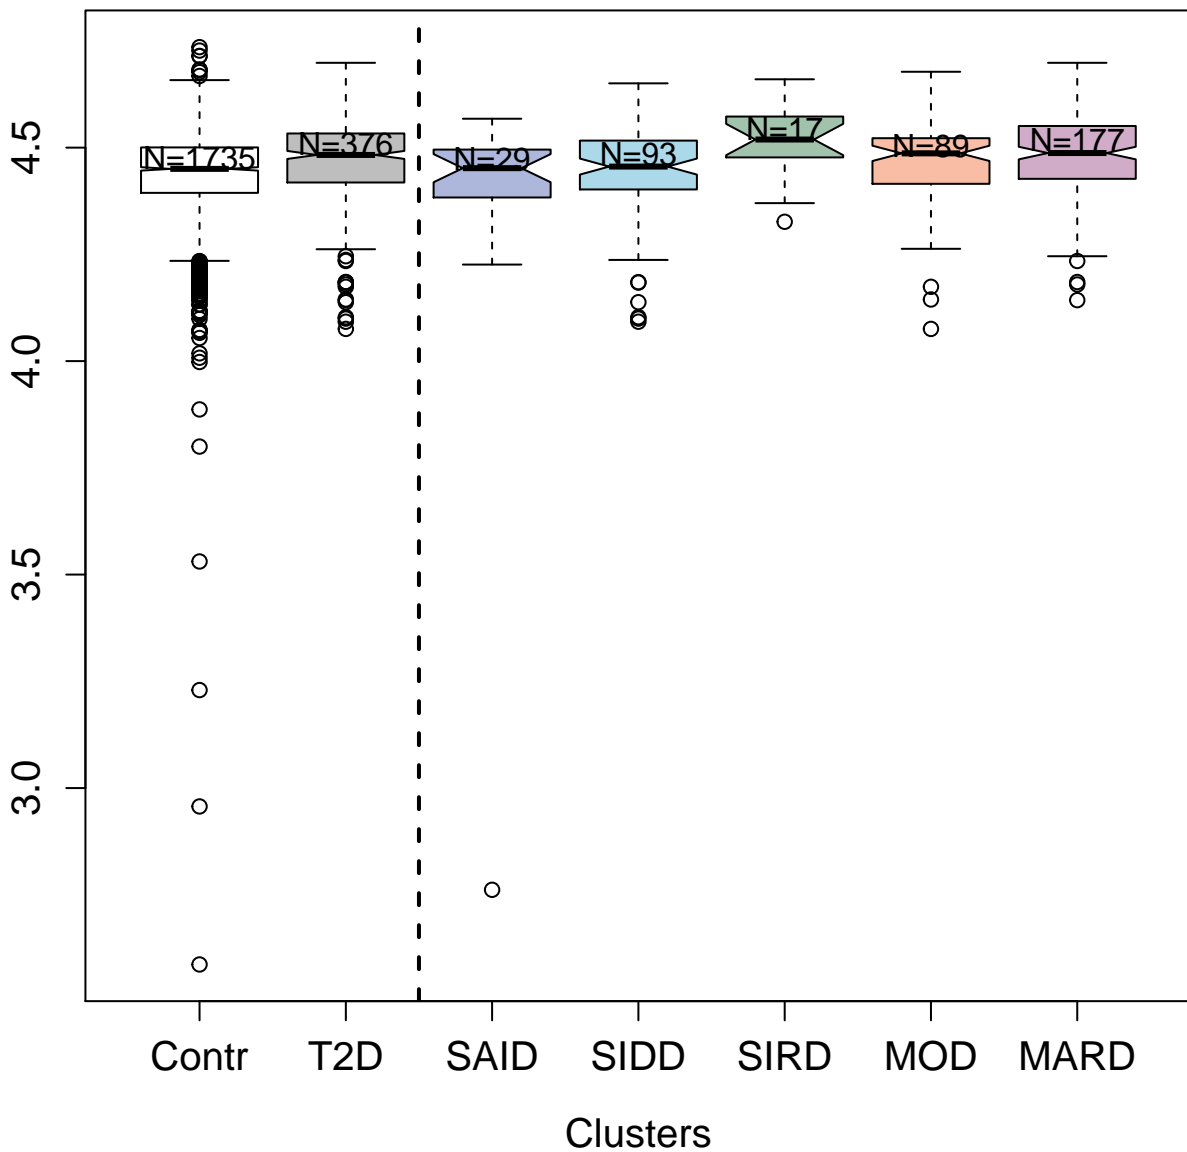



5456-59\_2 : Beta-Ala-His dipeptidase

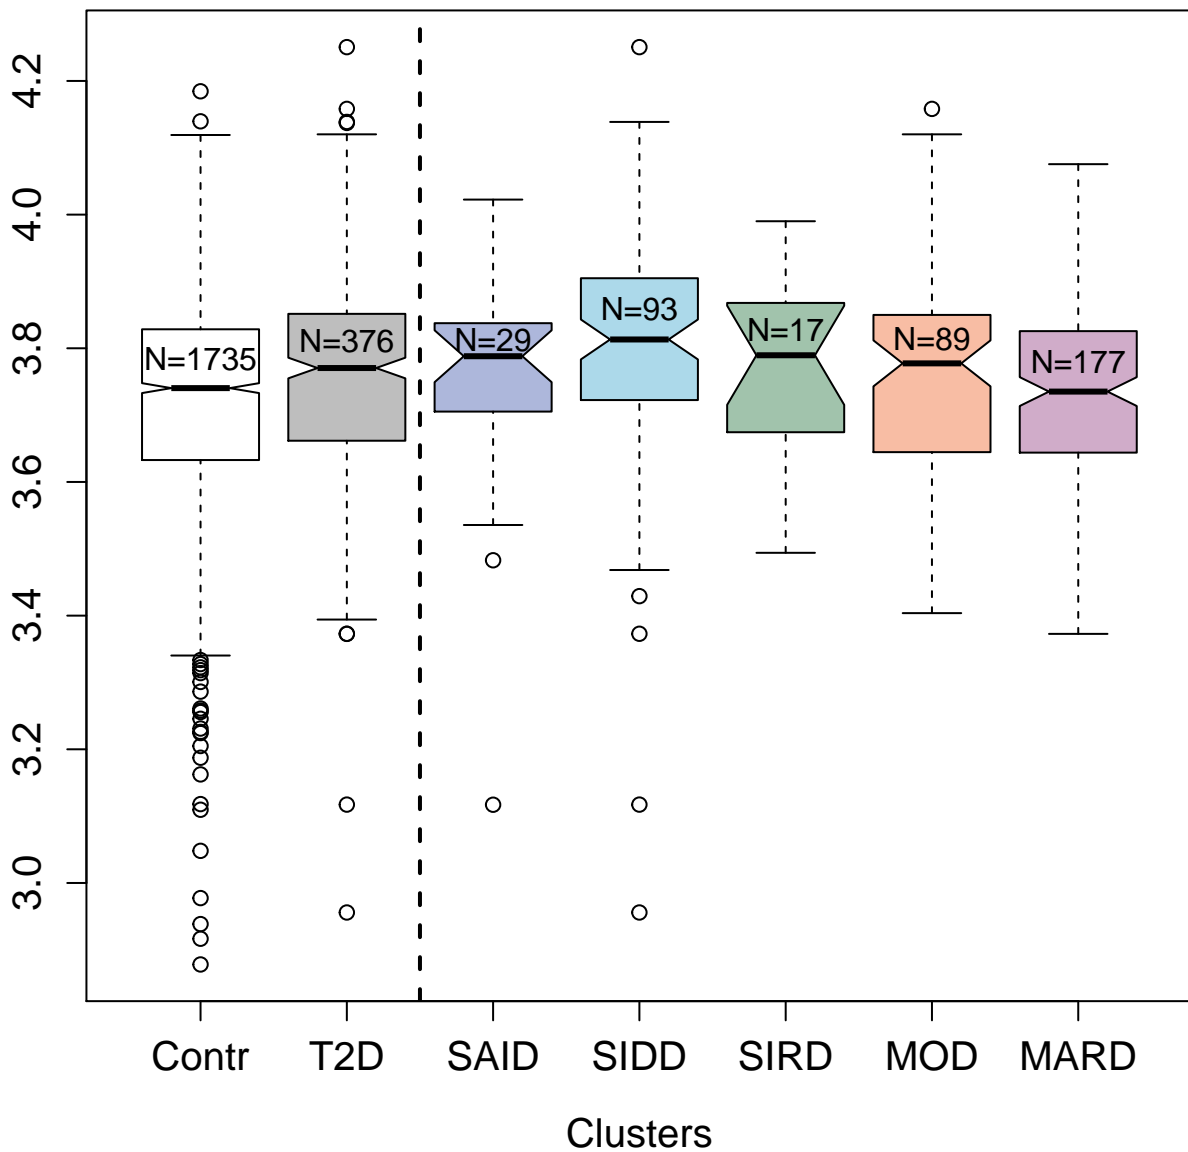

2900-53\_3 : C-C motif chemokine 14

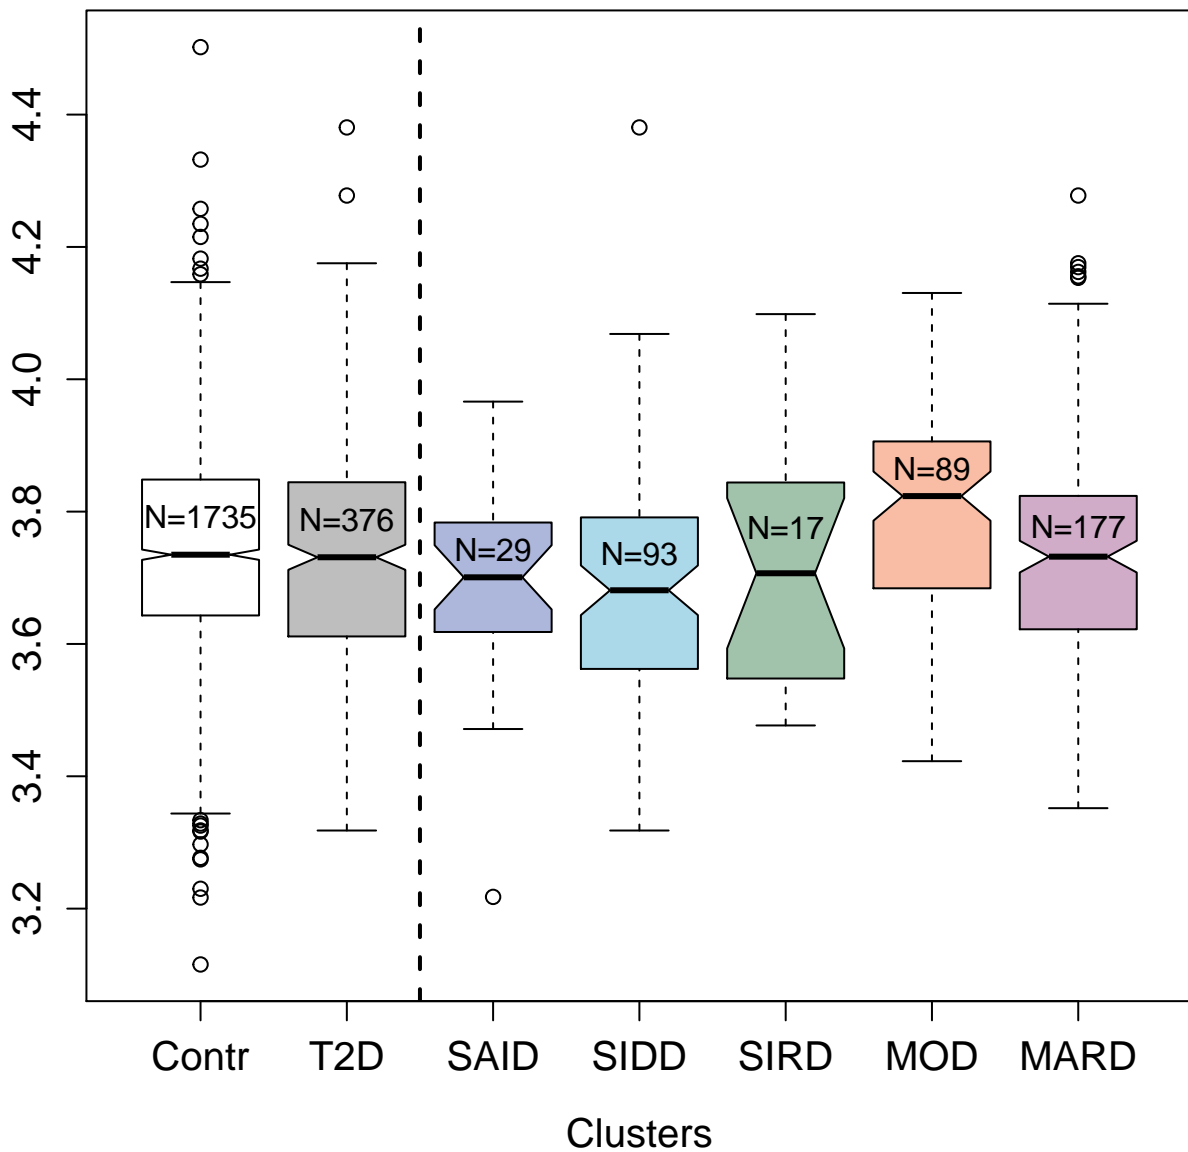

2771-35\_2 : Insulin-like growth factor-binding

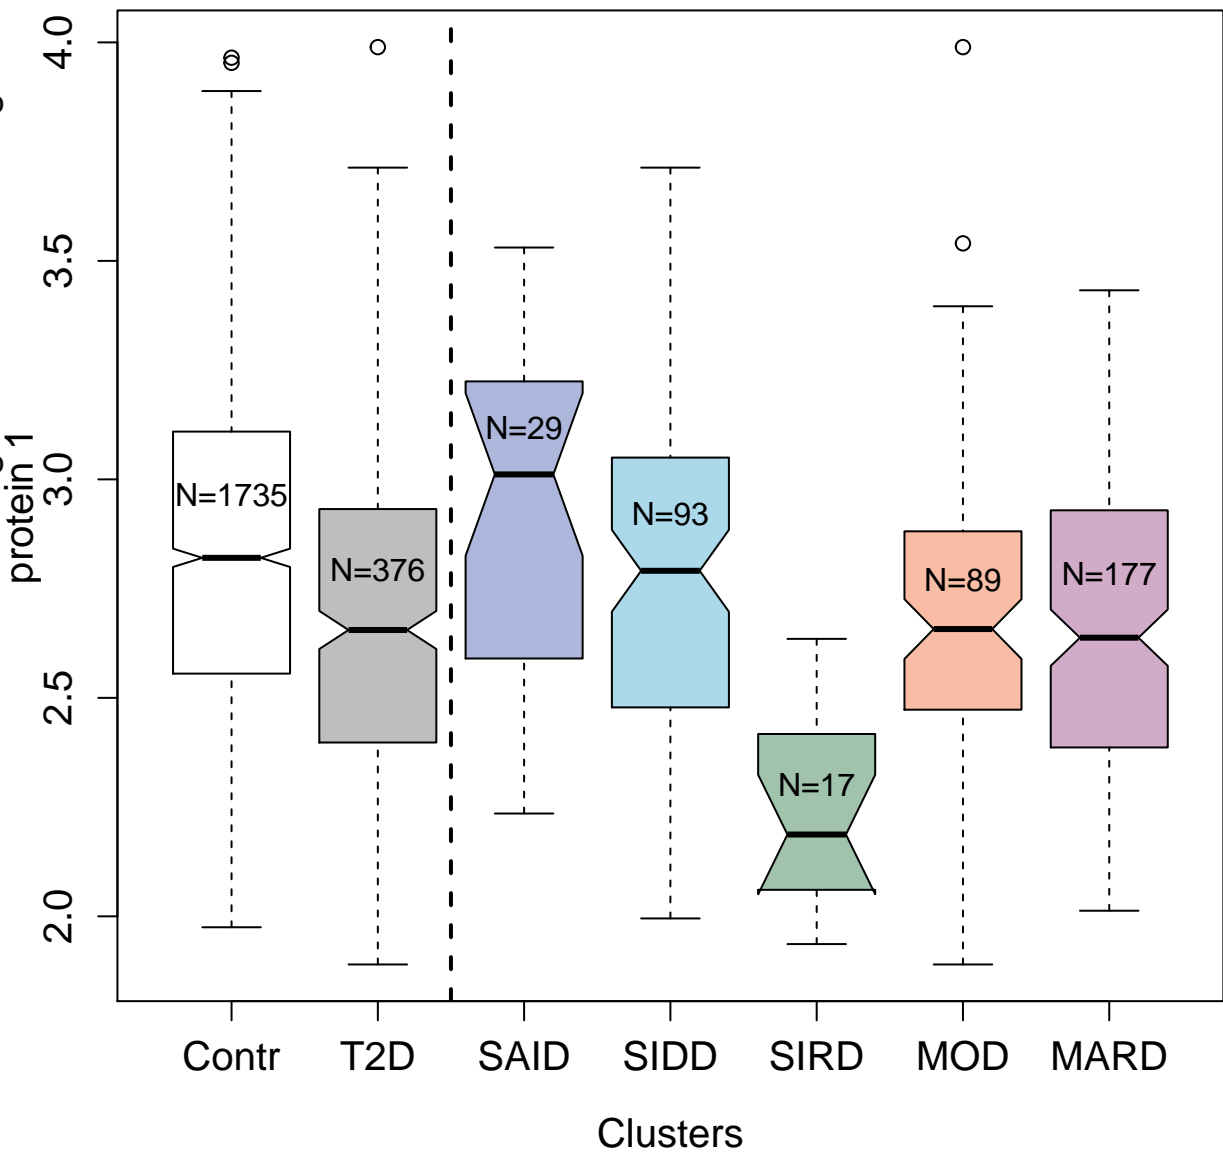



4829-43\_6 : 14-3-3 protein sigma

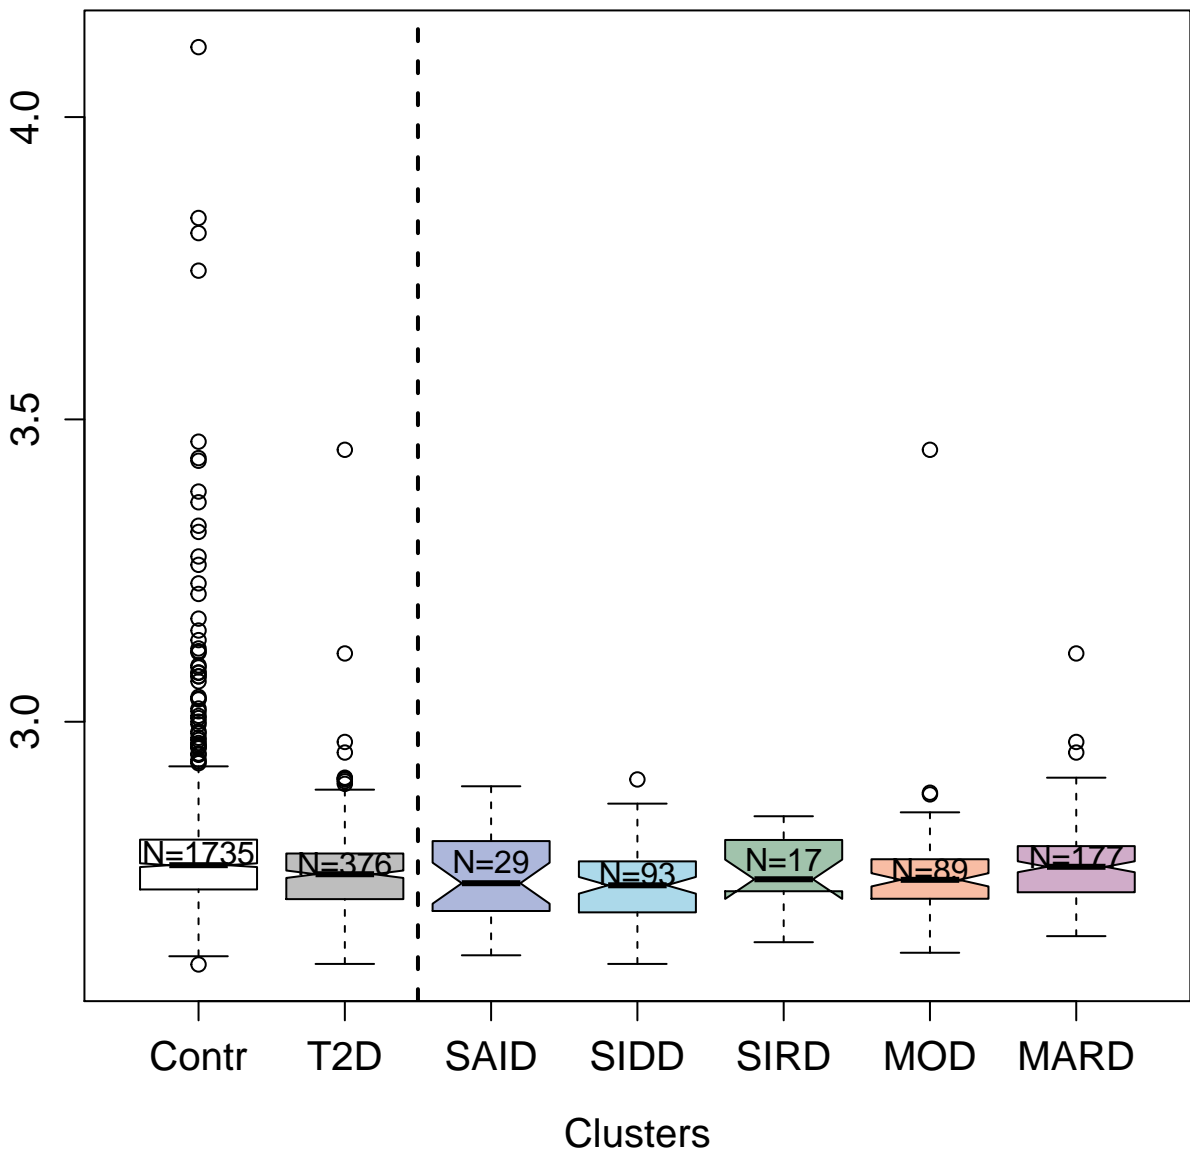

3280-49\_2 : Aggregran core protein

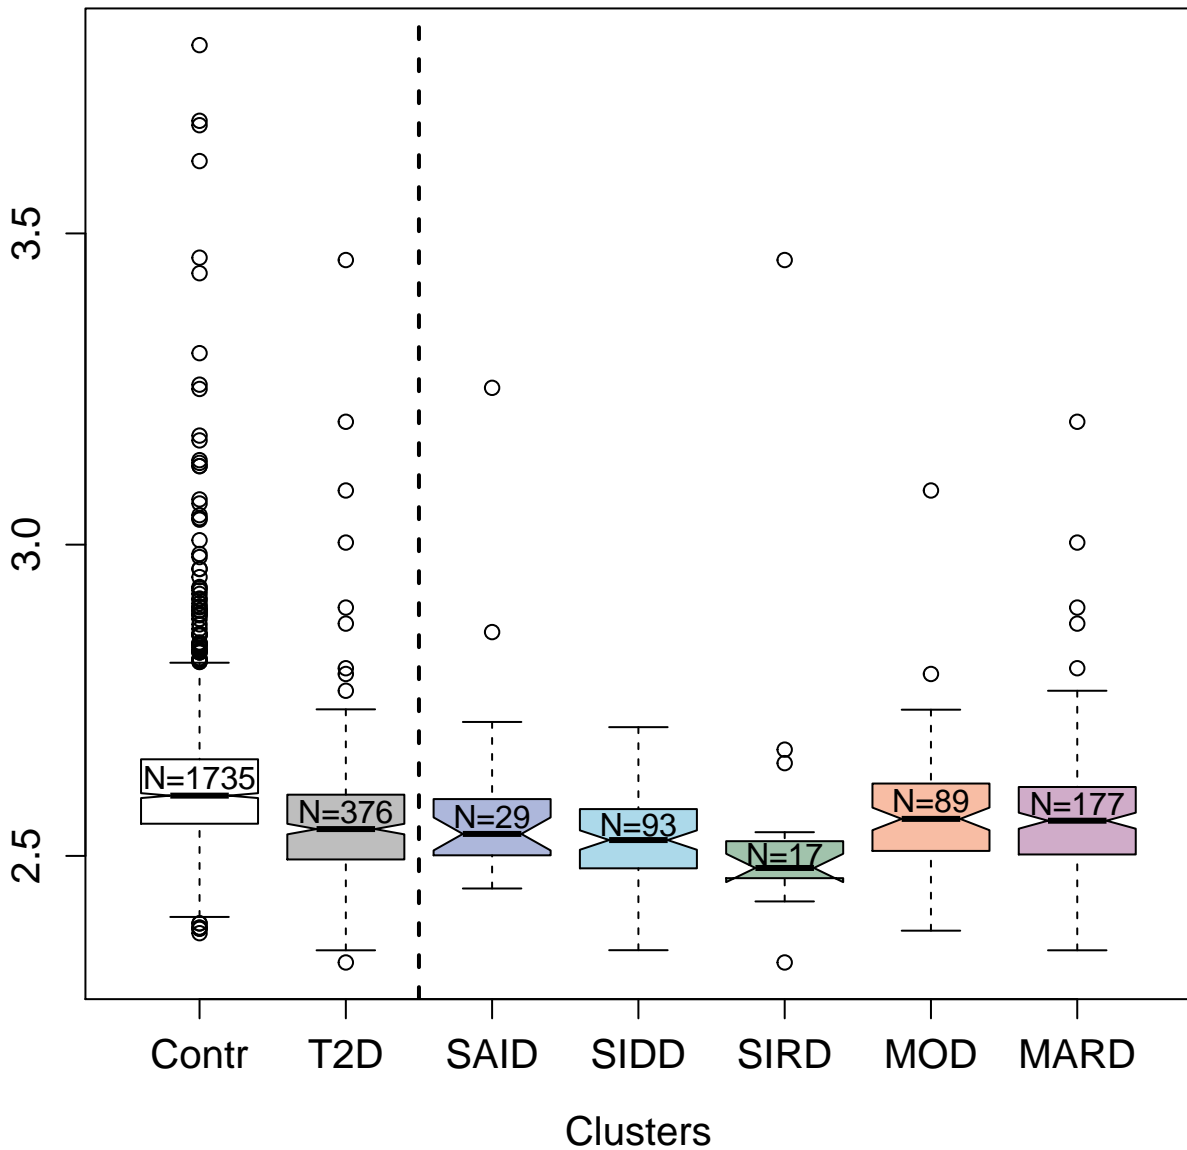

2836-68\_2 : Neutrophil gelatinase-associated lipocalin

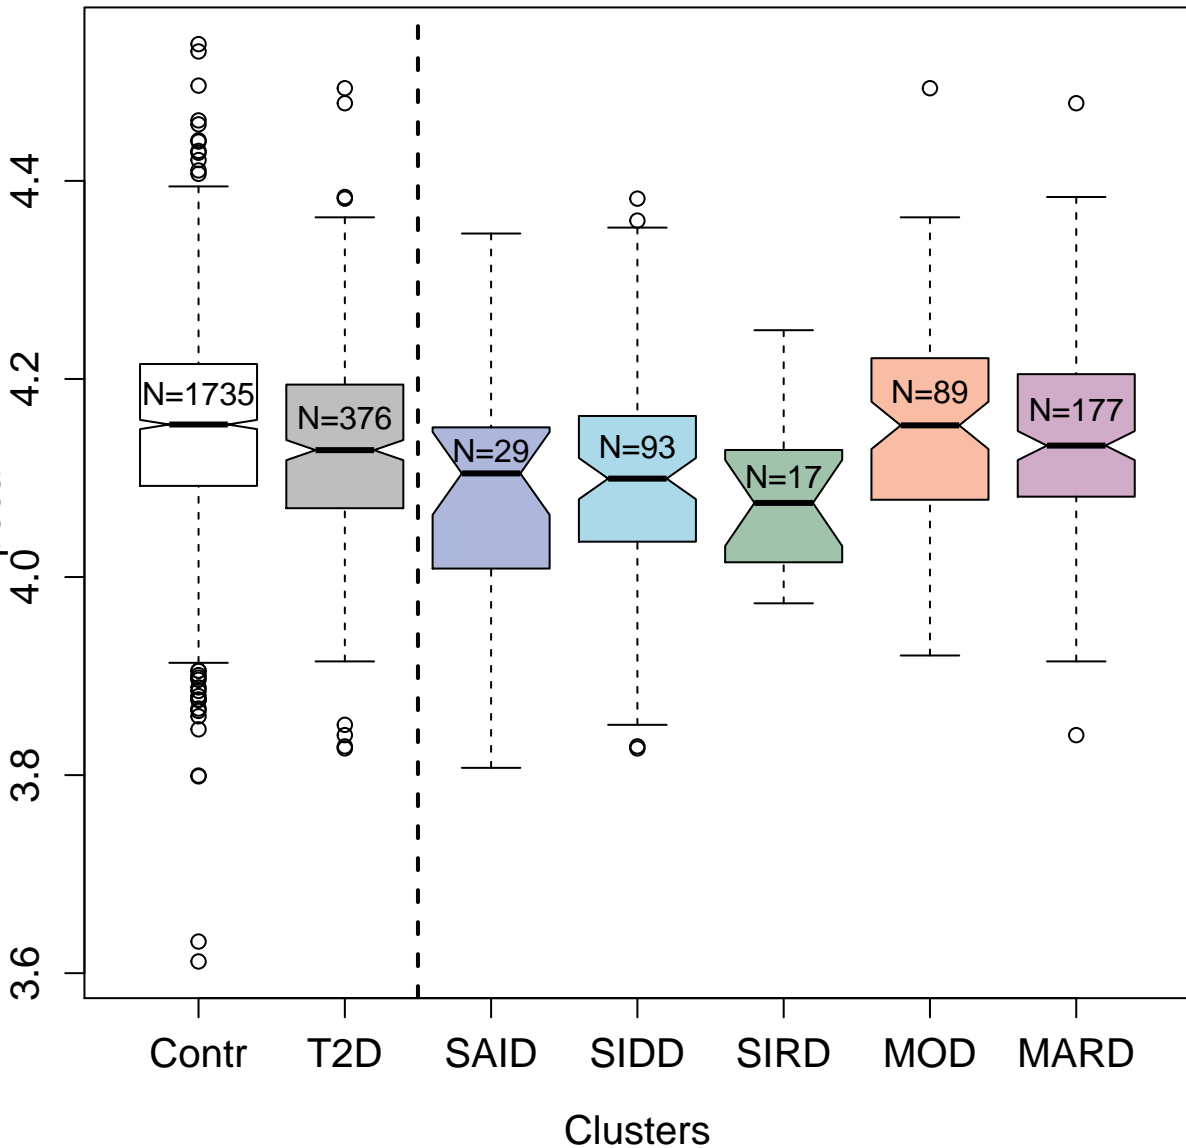

3817-18\_1 : Protein kinase C theta type

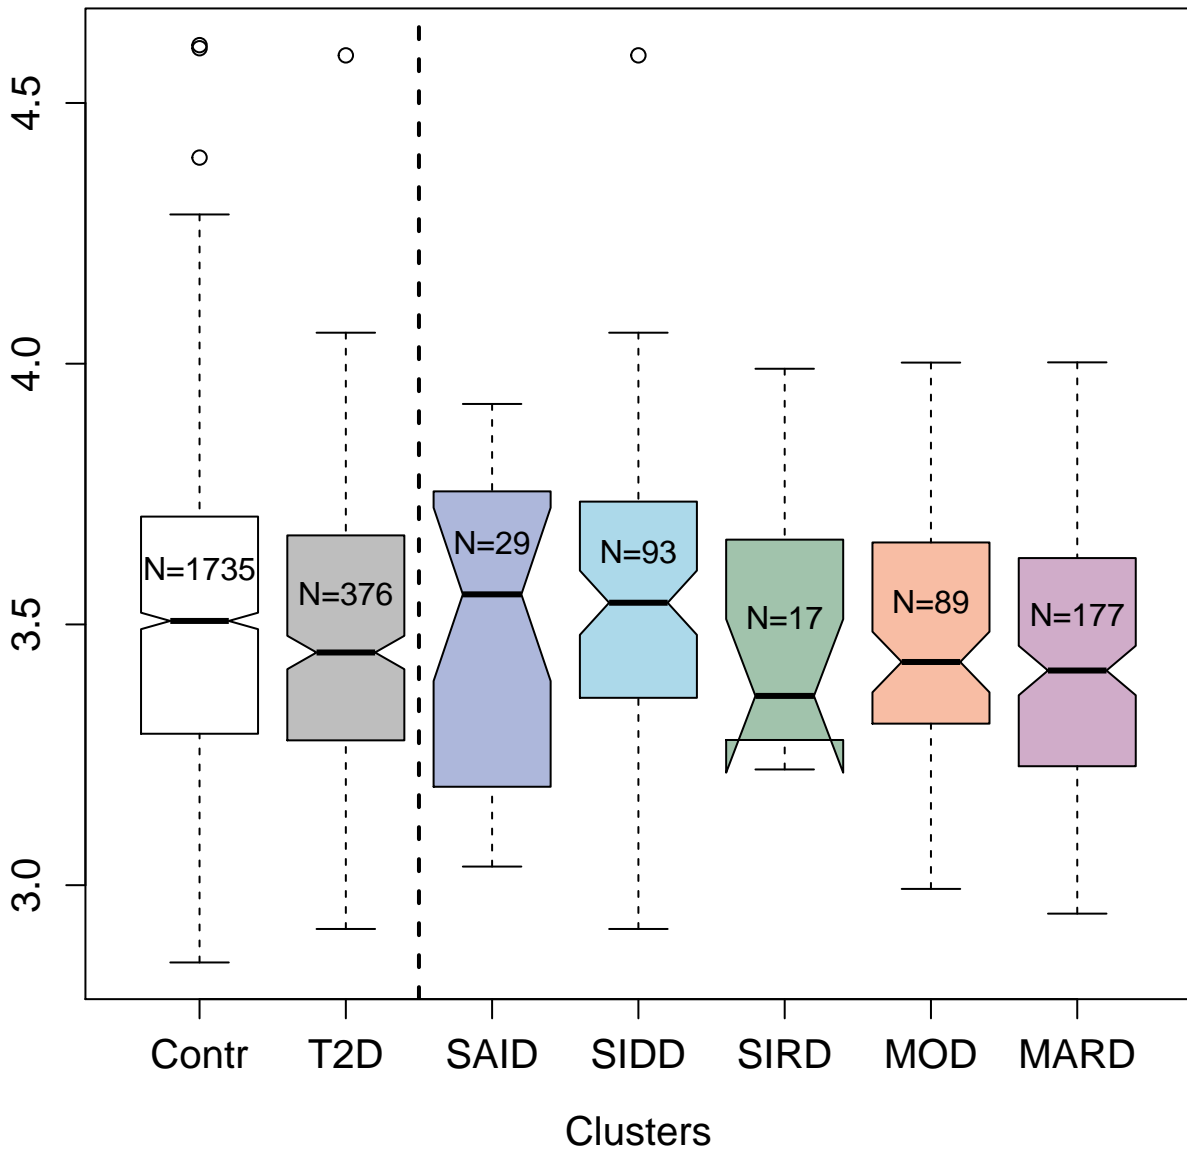

2797-56\_2 : Apolipoprotein B

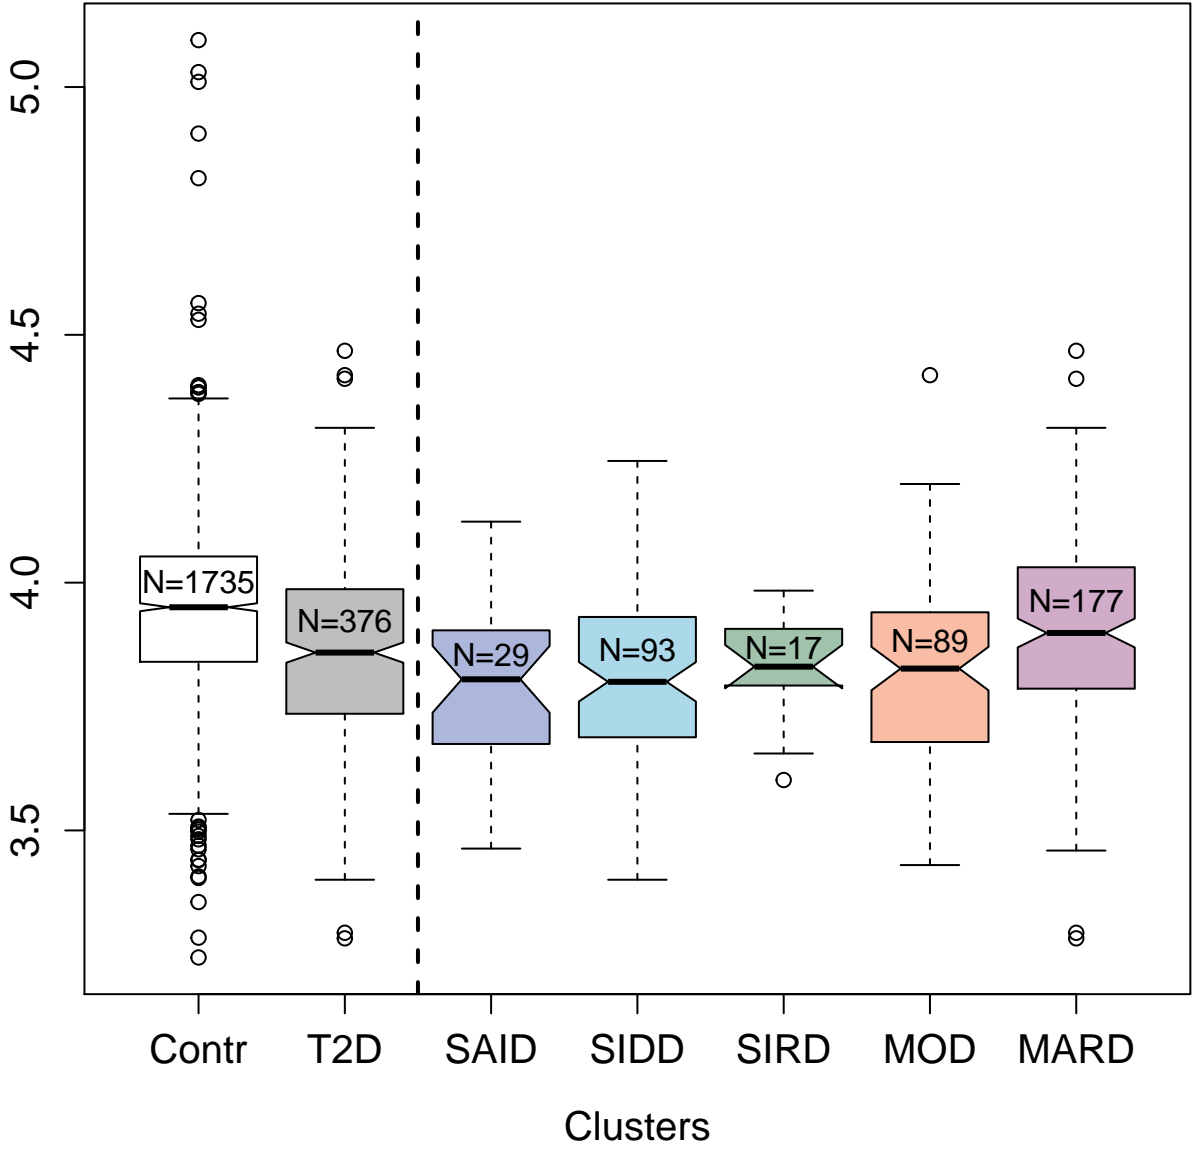

3314-74\_2 : GDNF family receptor alpha-1

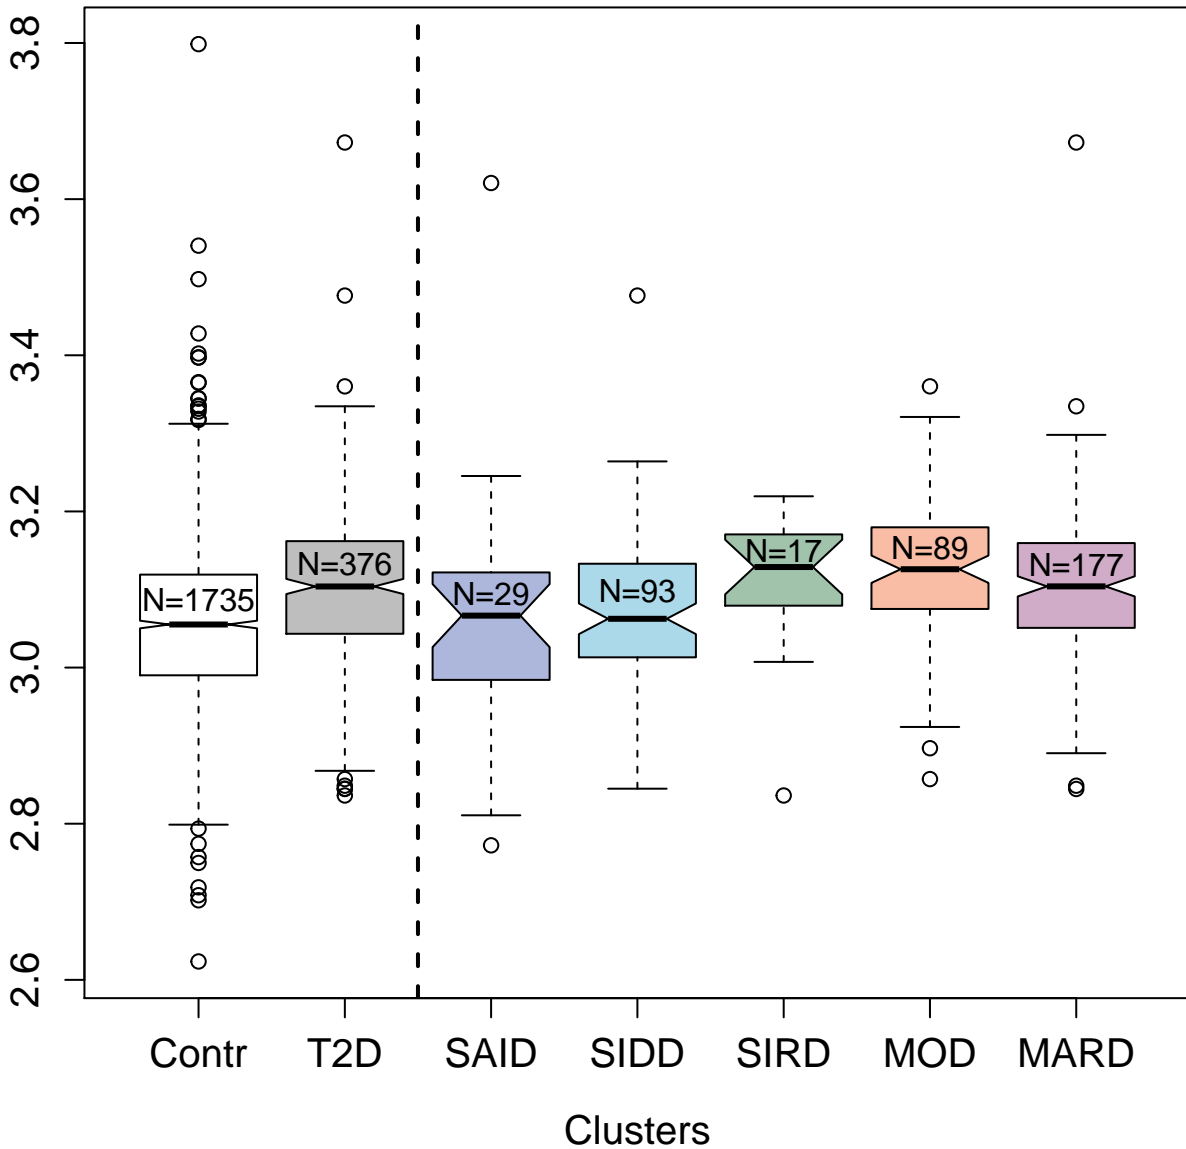

2826-53\_2 : Ectodysplasin-A; secreted form

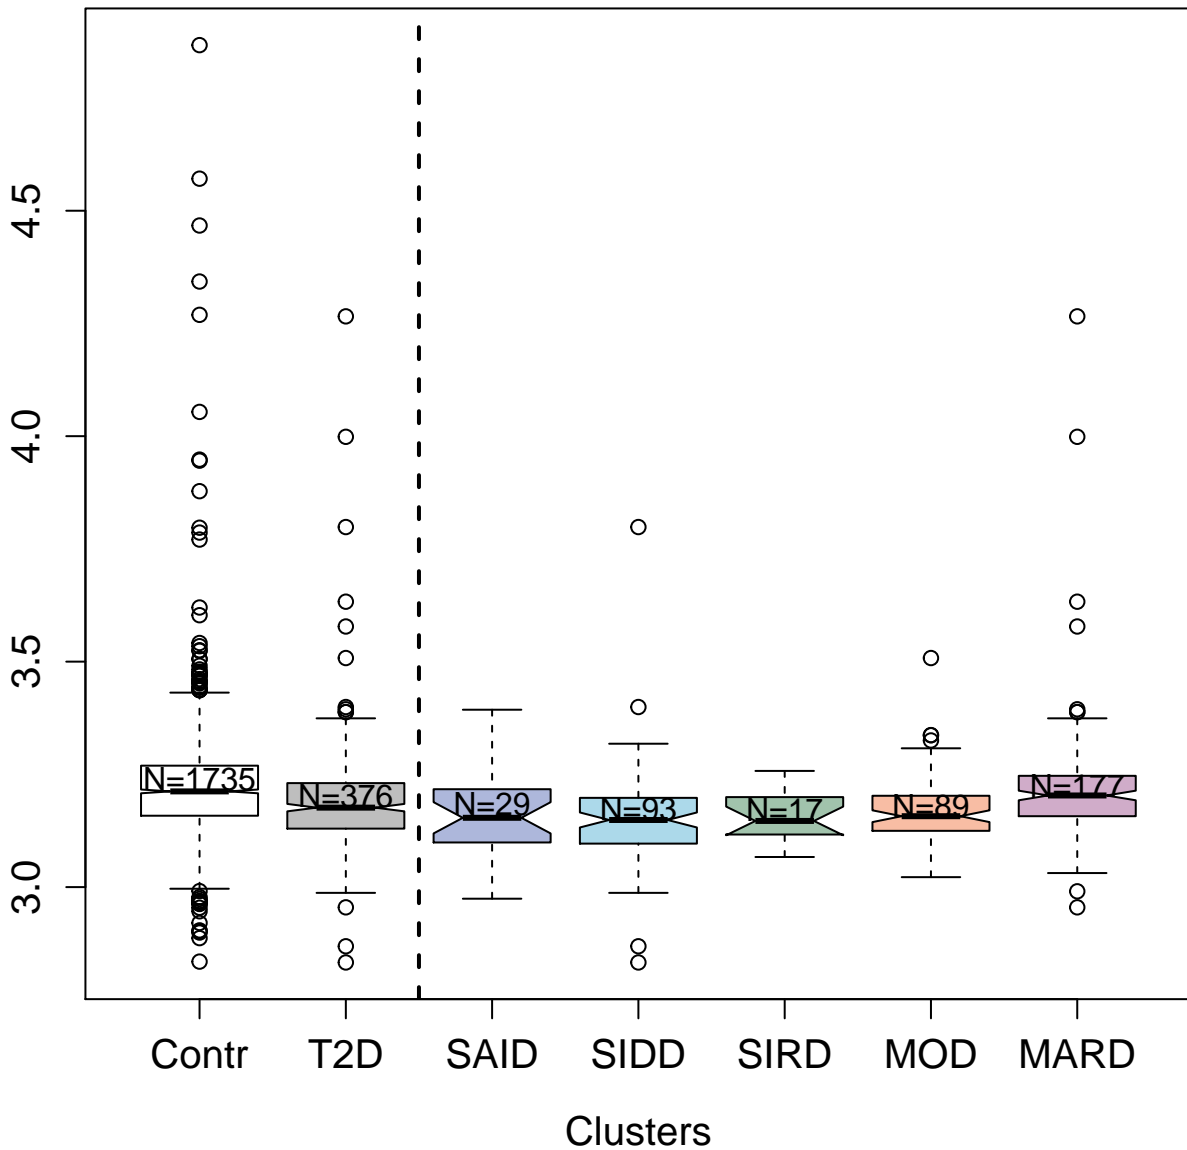

4482-66\_2 : Complement C5b-C6 complex

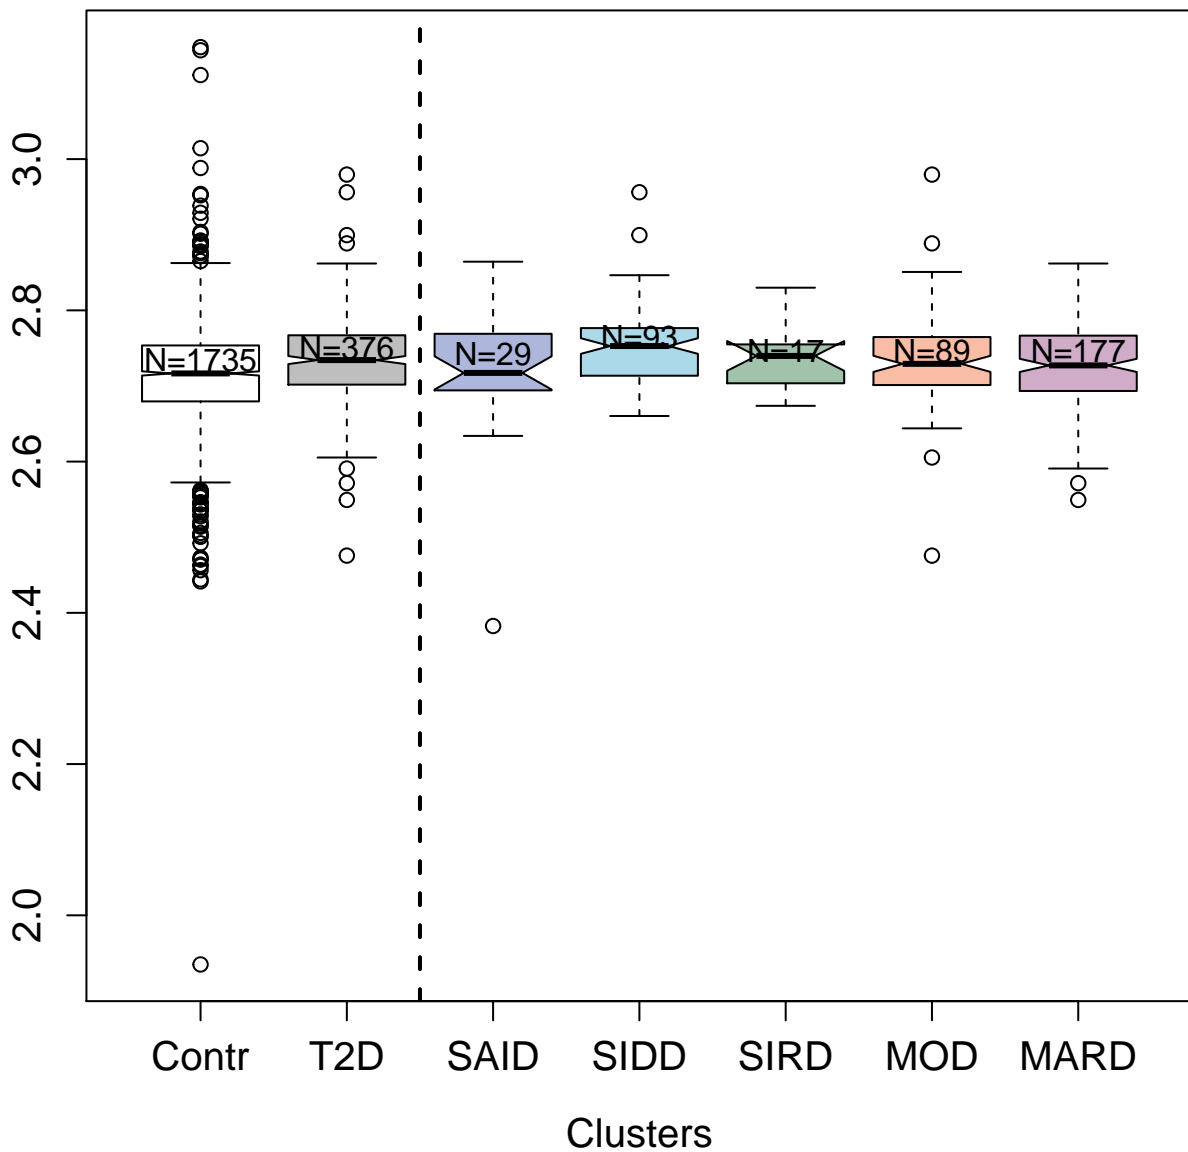



8463-2\_3 : Extracellular superoxide dismutase

[Cu-Zn]

2.5 3.0 3.5 4.0

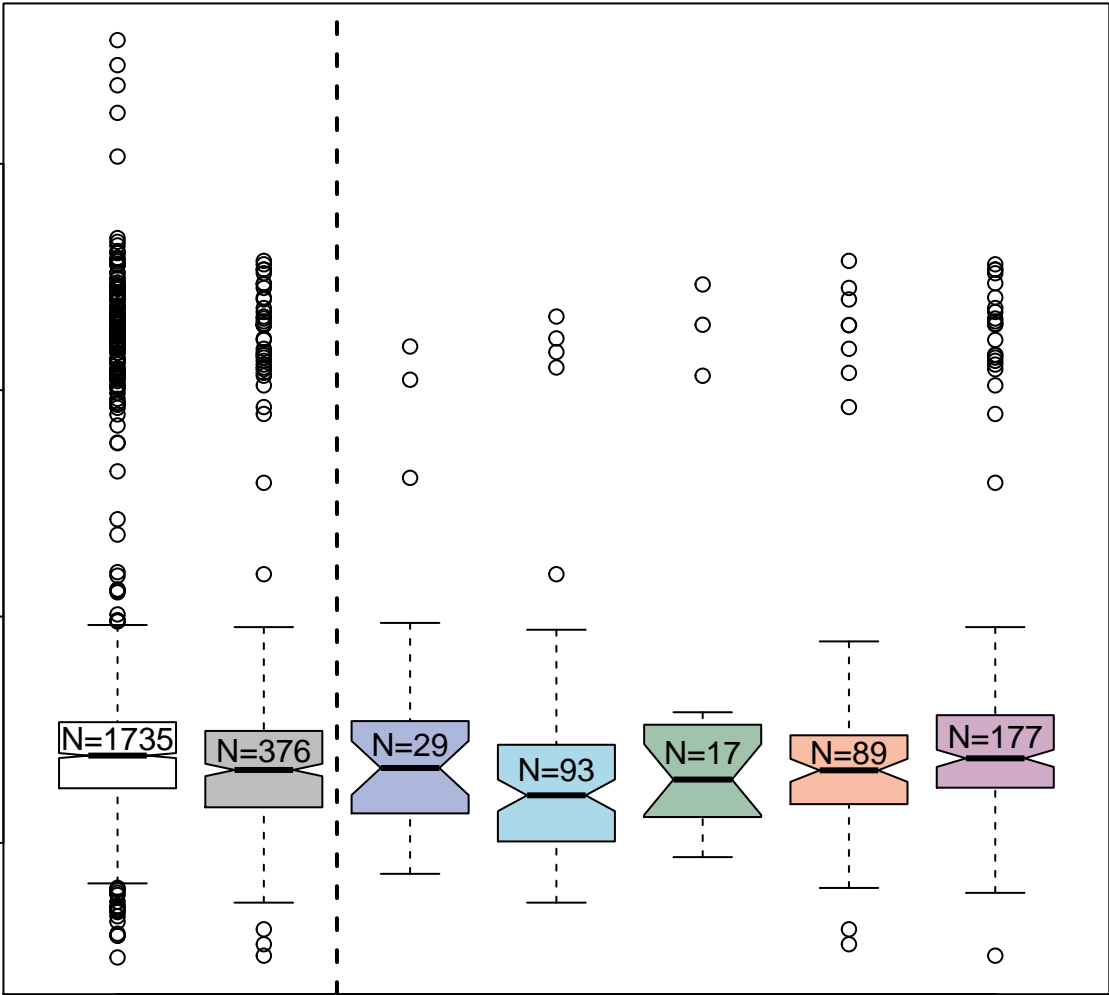

Clusters

Contr

T2D

SAID

SIDD

SIRD

MOD

MARD

9201-13\_3 : Transgelin-2

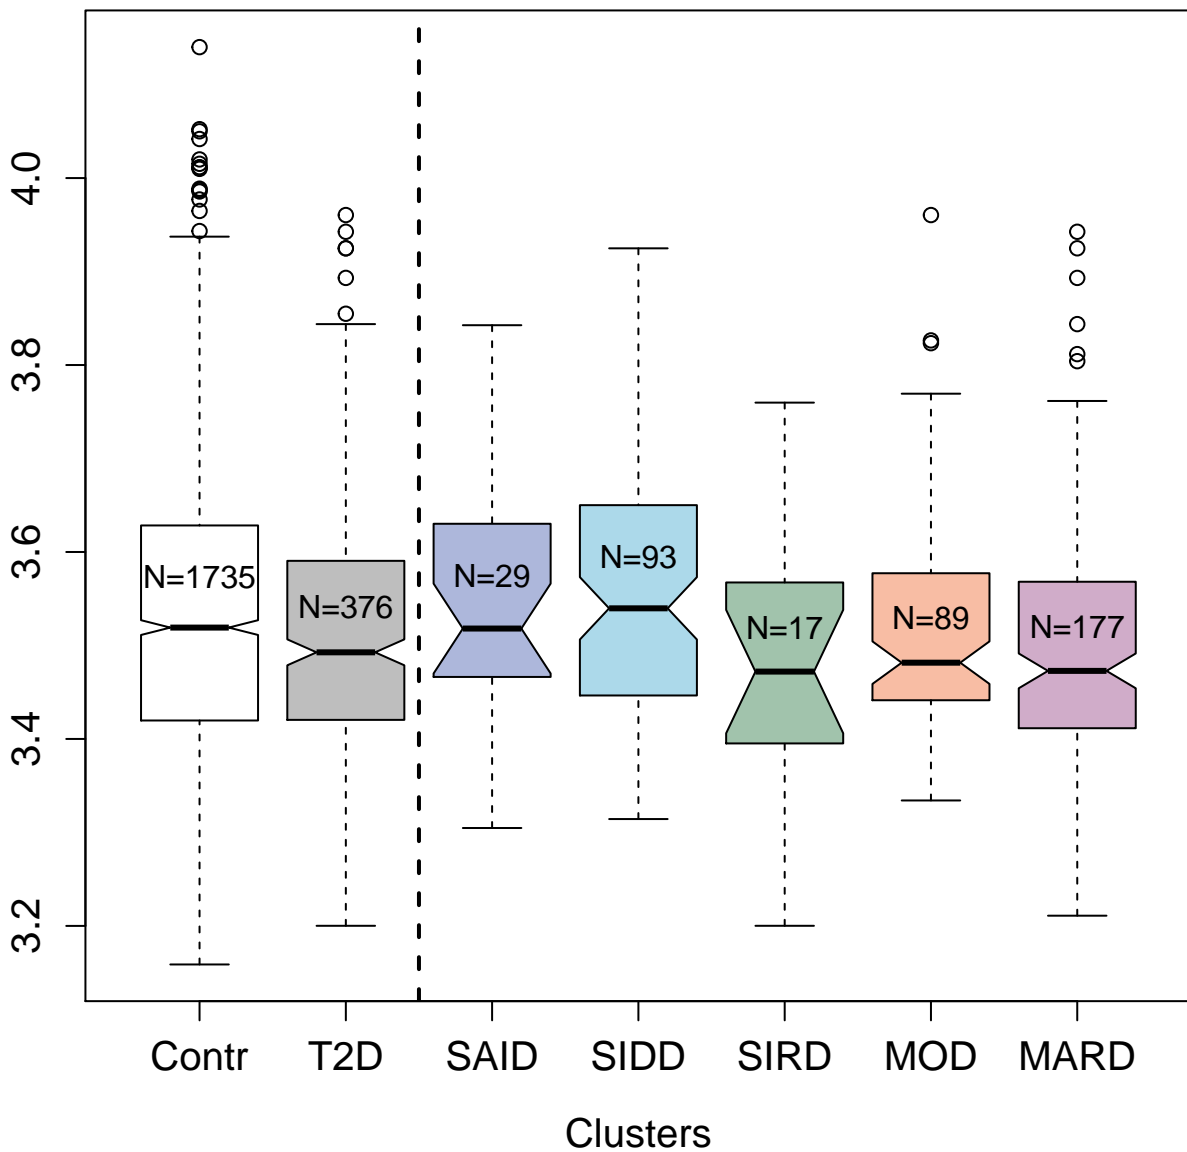

5018-68\_1 : Peroxiredoxin-6

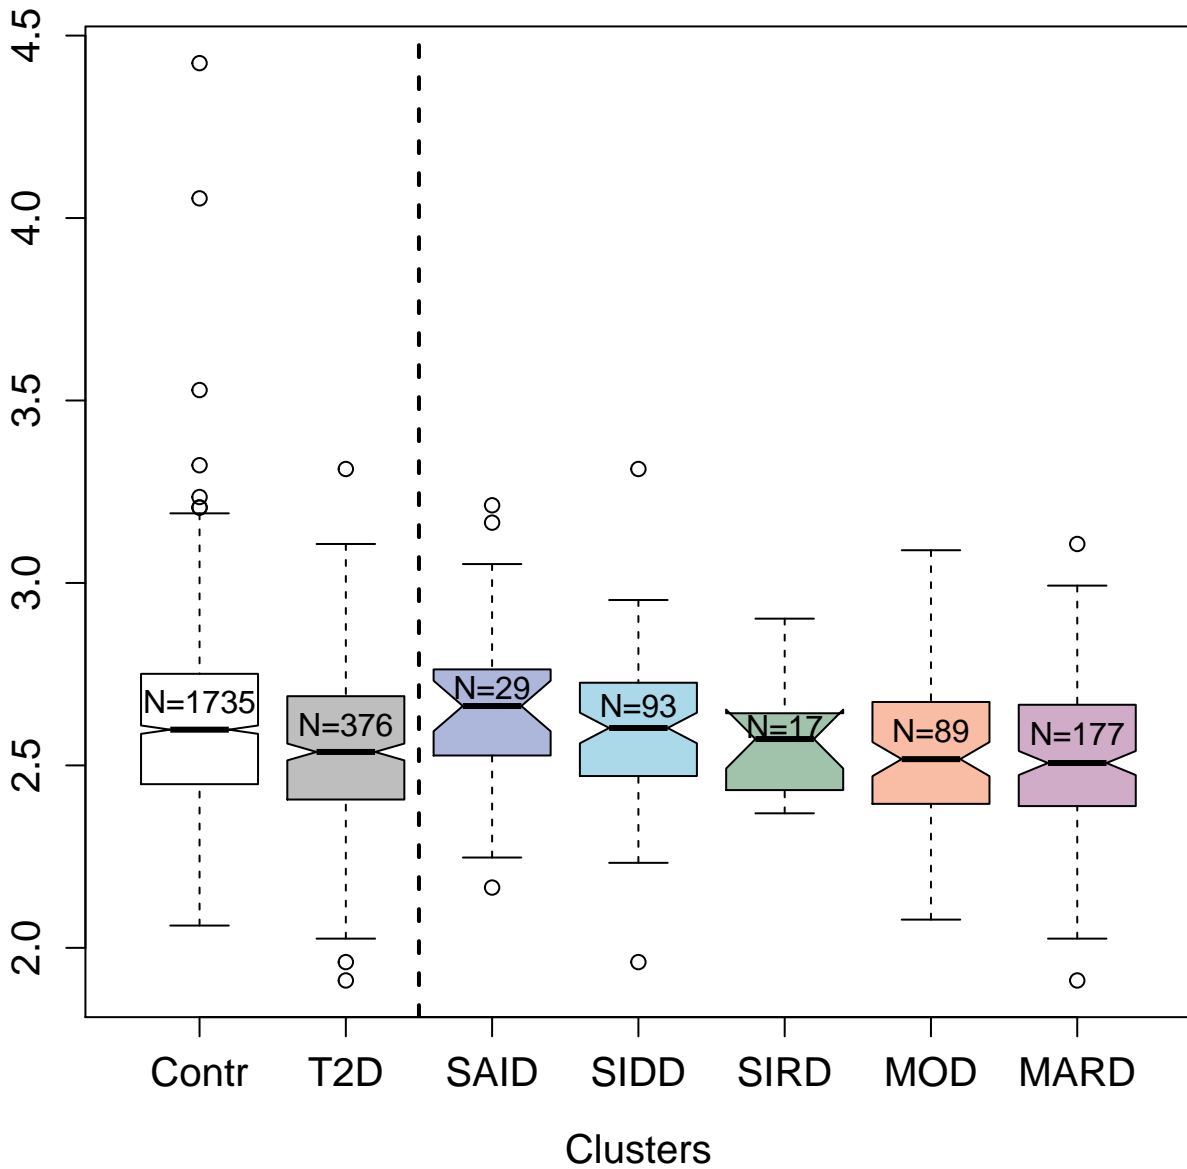

3057-55\_1 : WNT1-inducible-signaling pathway

protein 1

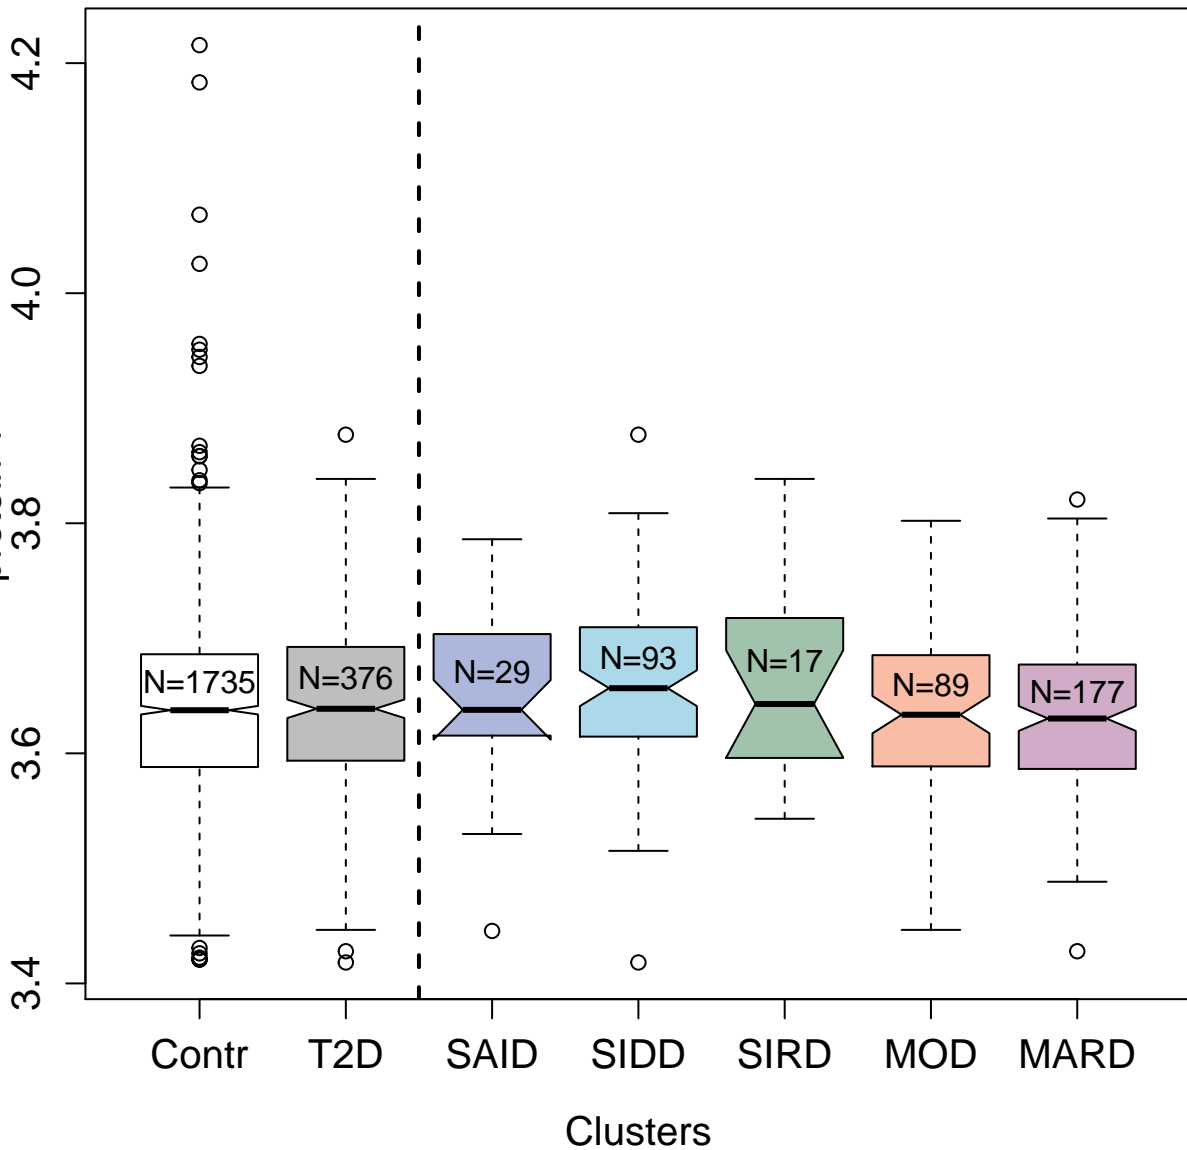

5954-62\_3 : Parathyroid hormone

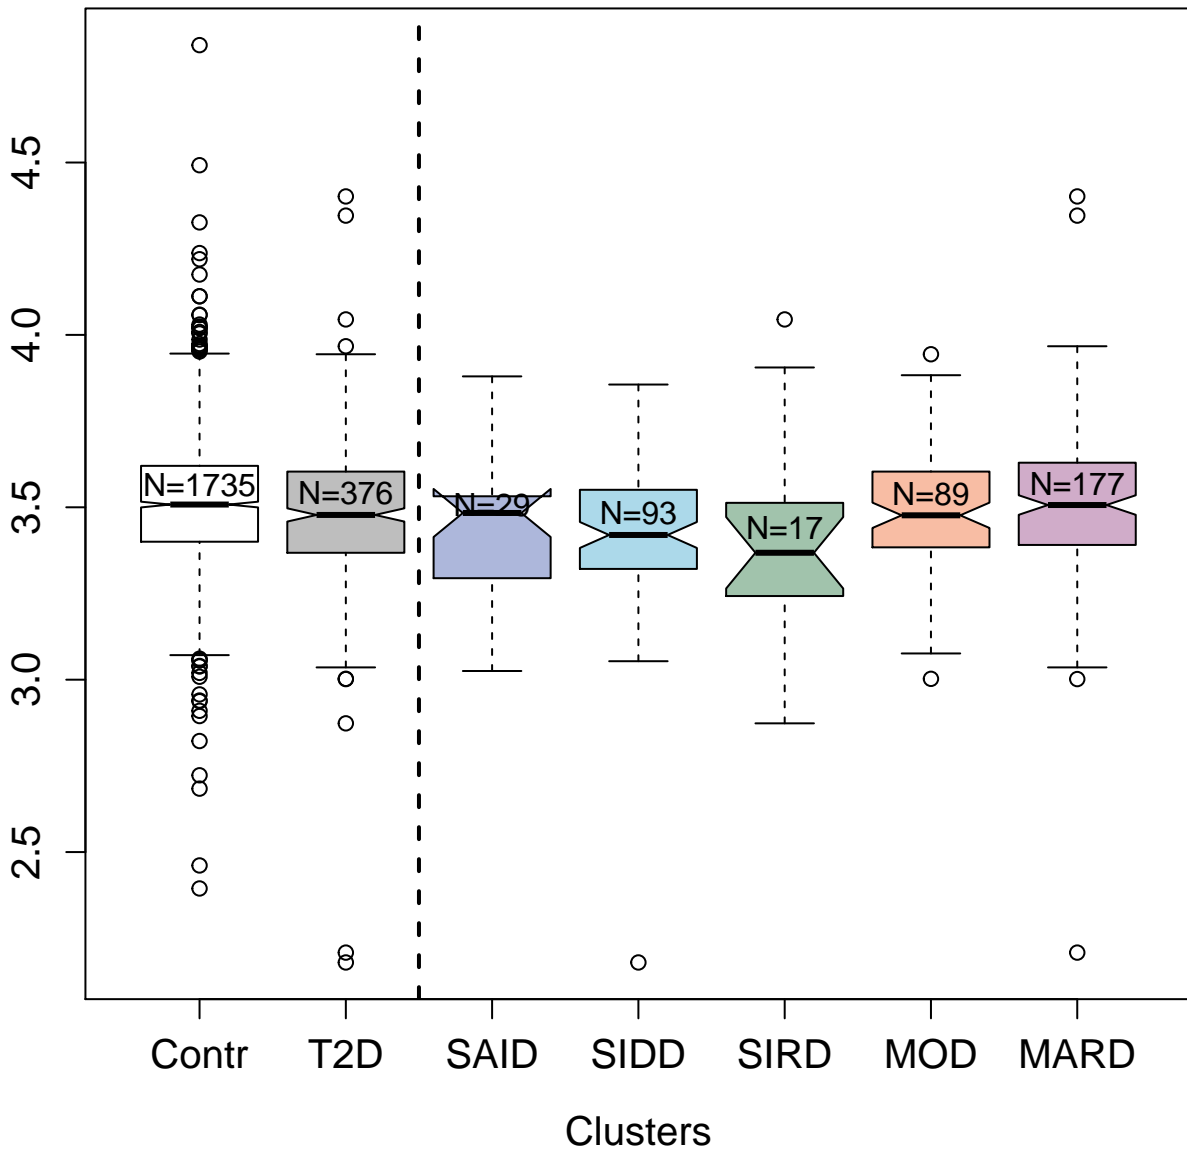

4982-54\_1 : Elafin

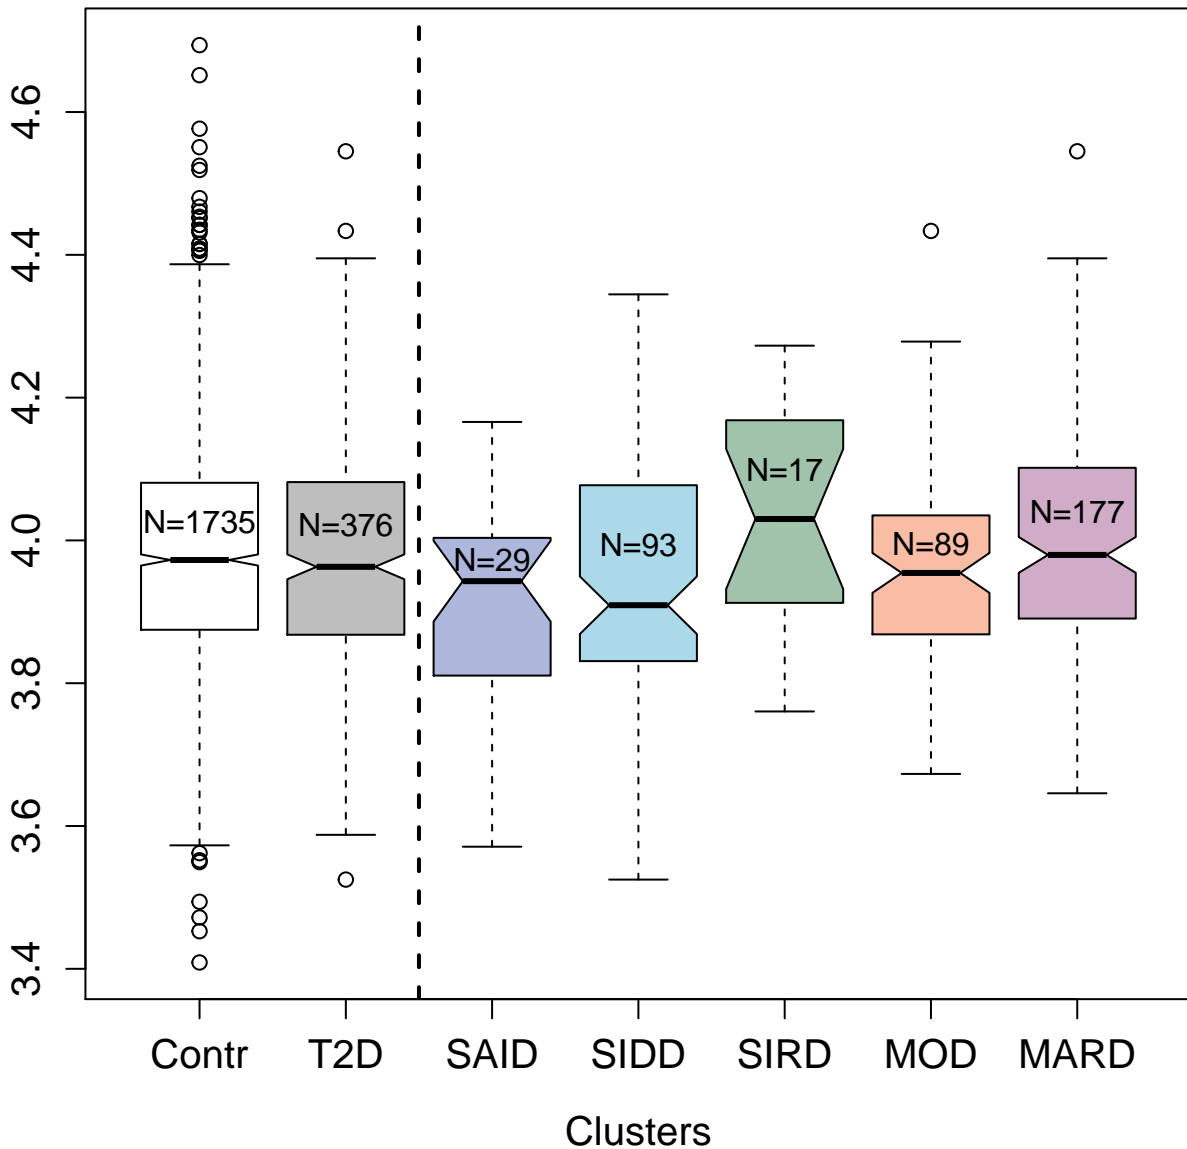

2831-29\_1 : Kallikrein-11

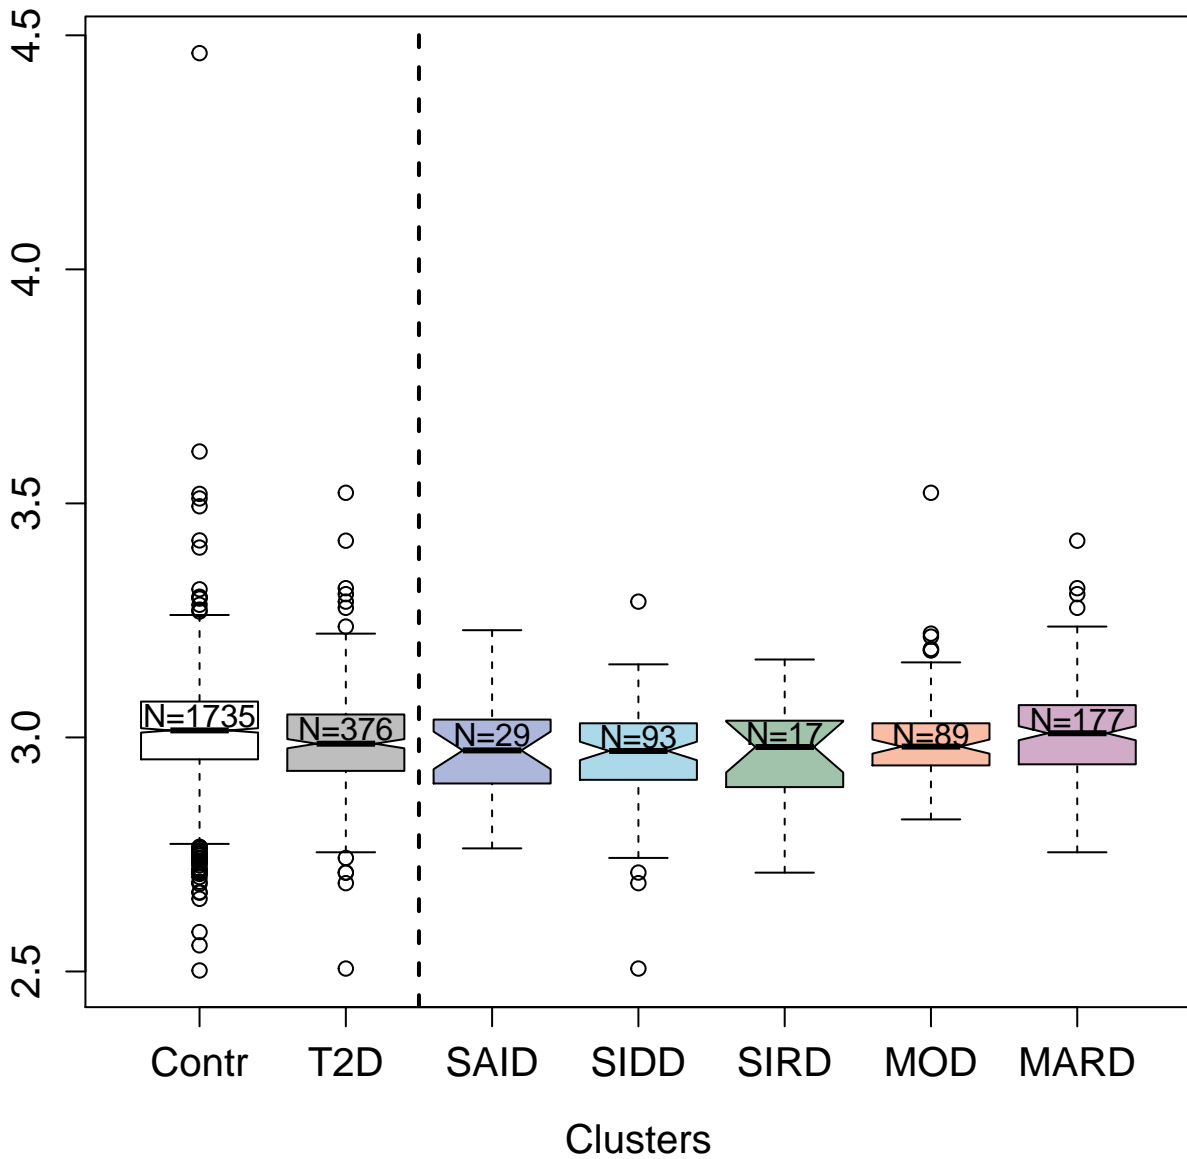

3340-53\_1 : Thrombospondin-4

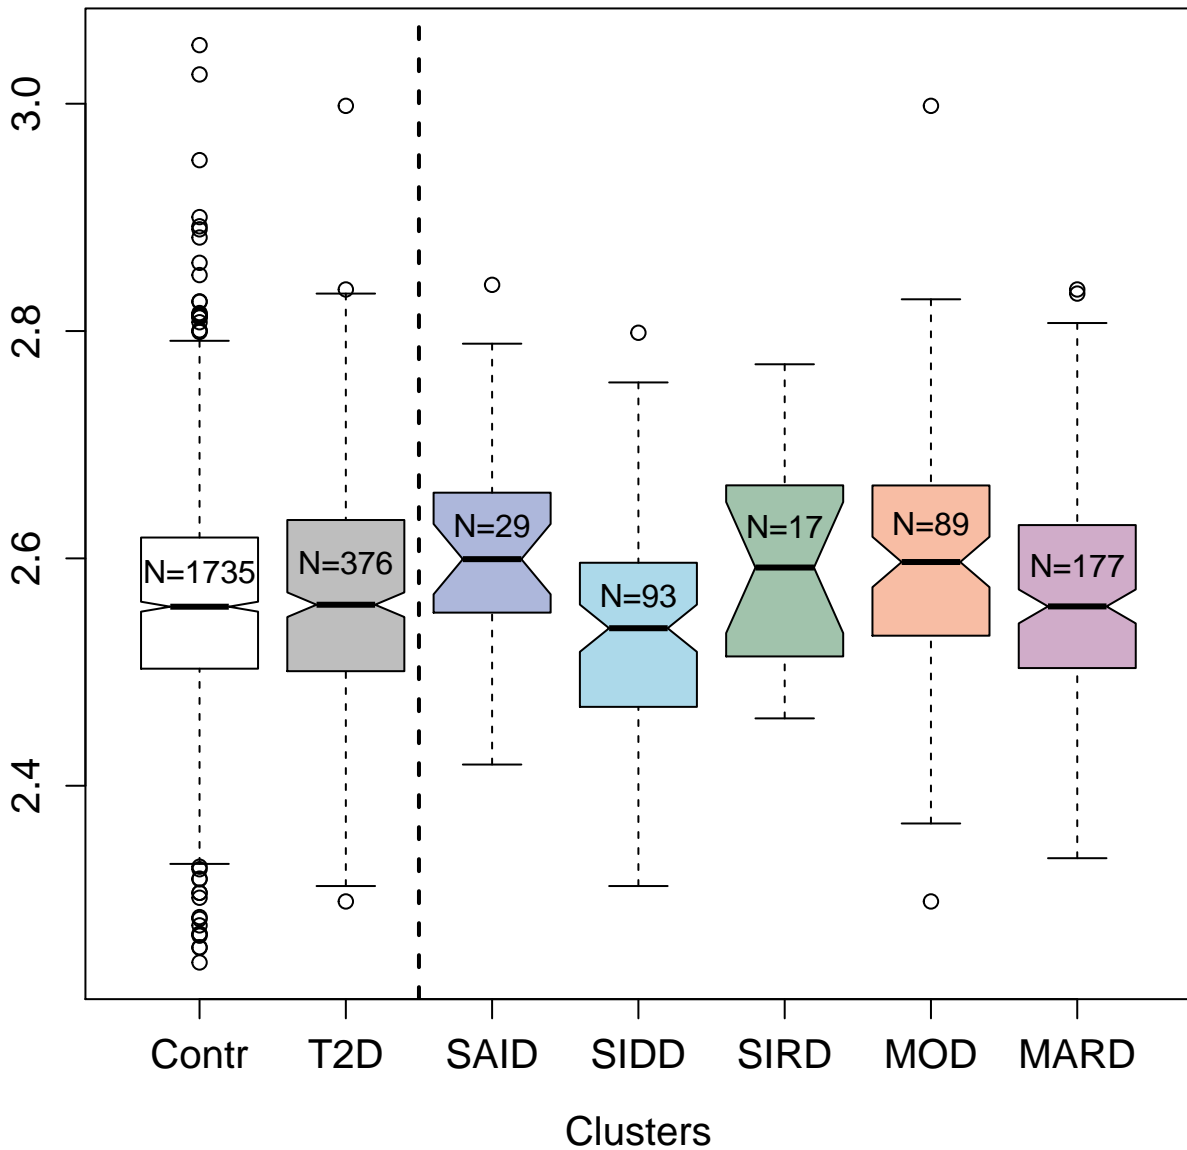



2278-61\_4 : Metalloproteinase inhibitor 2

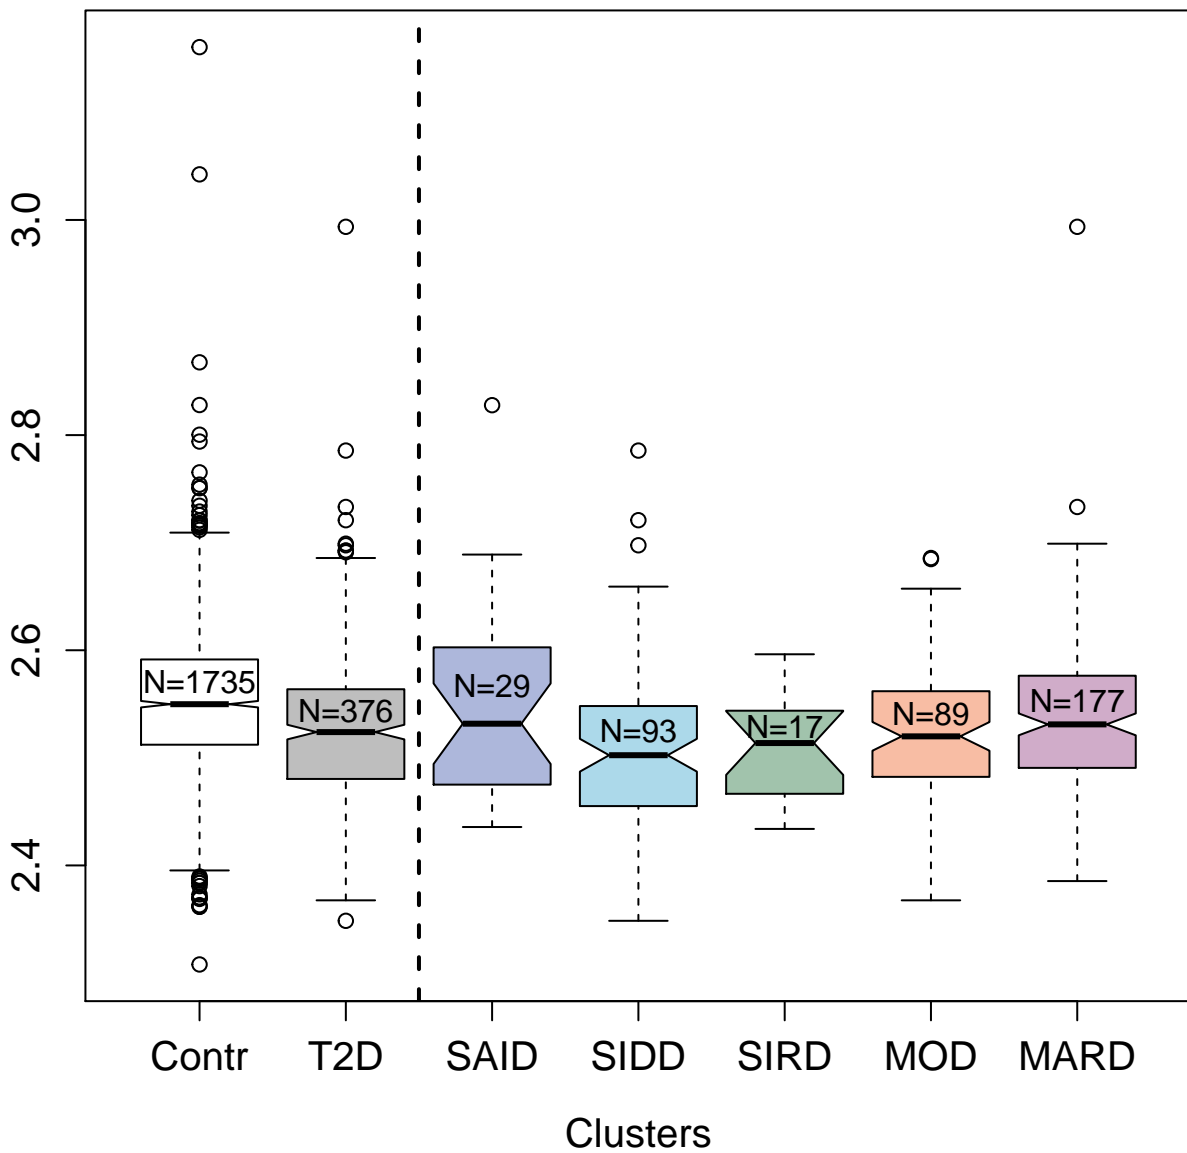

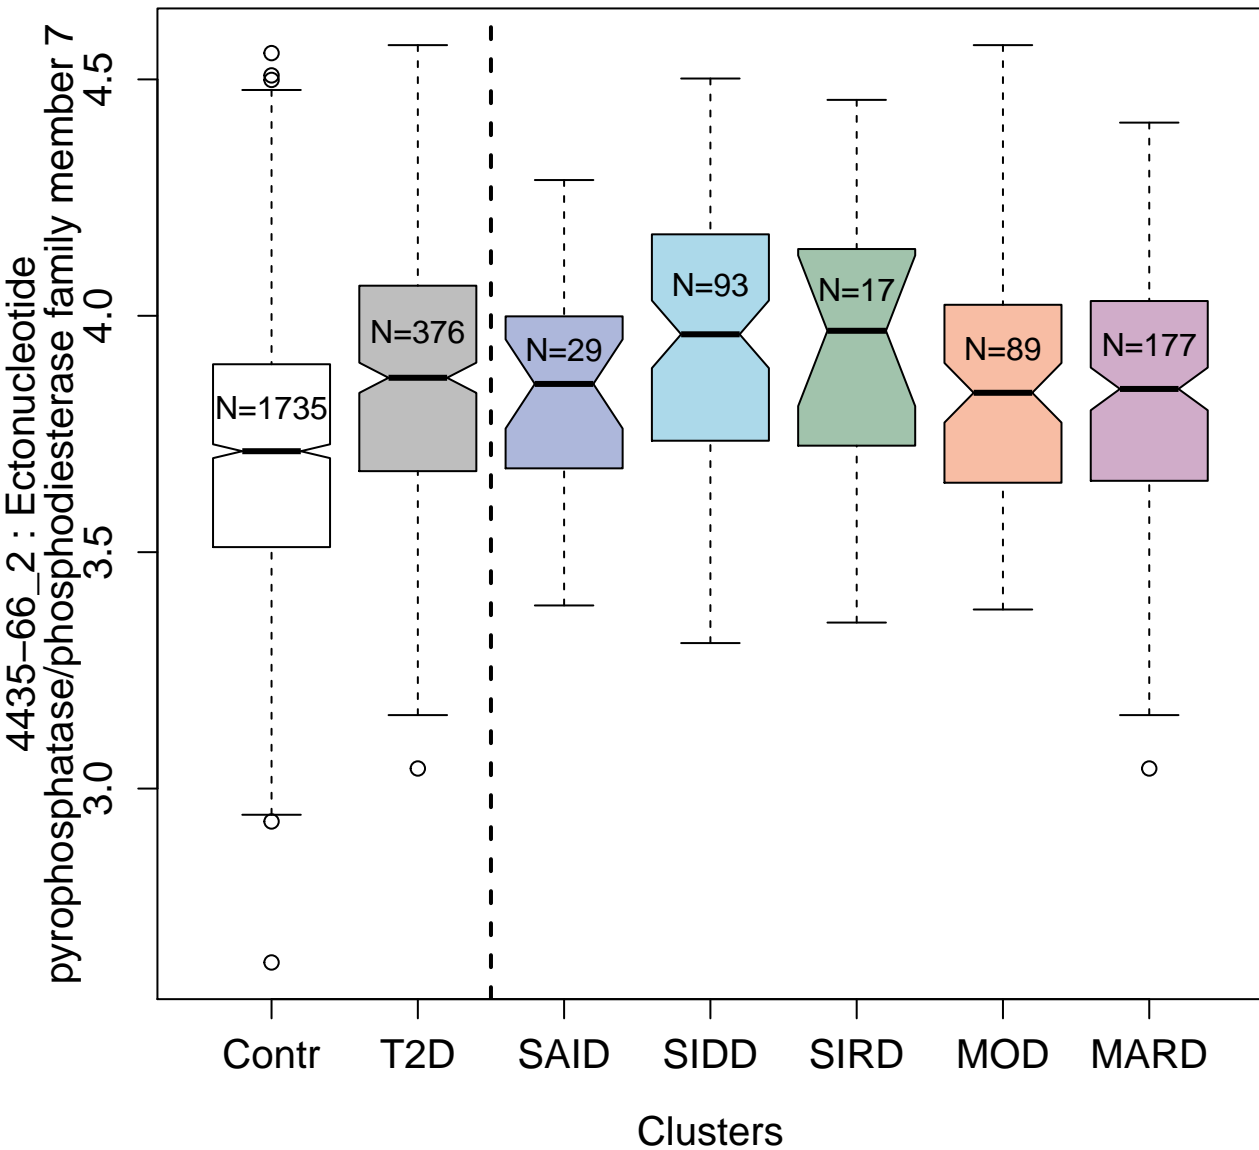

4998-50\_2 : Tyrosine-protein kinase JAK2

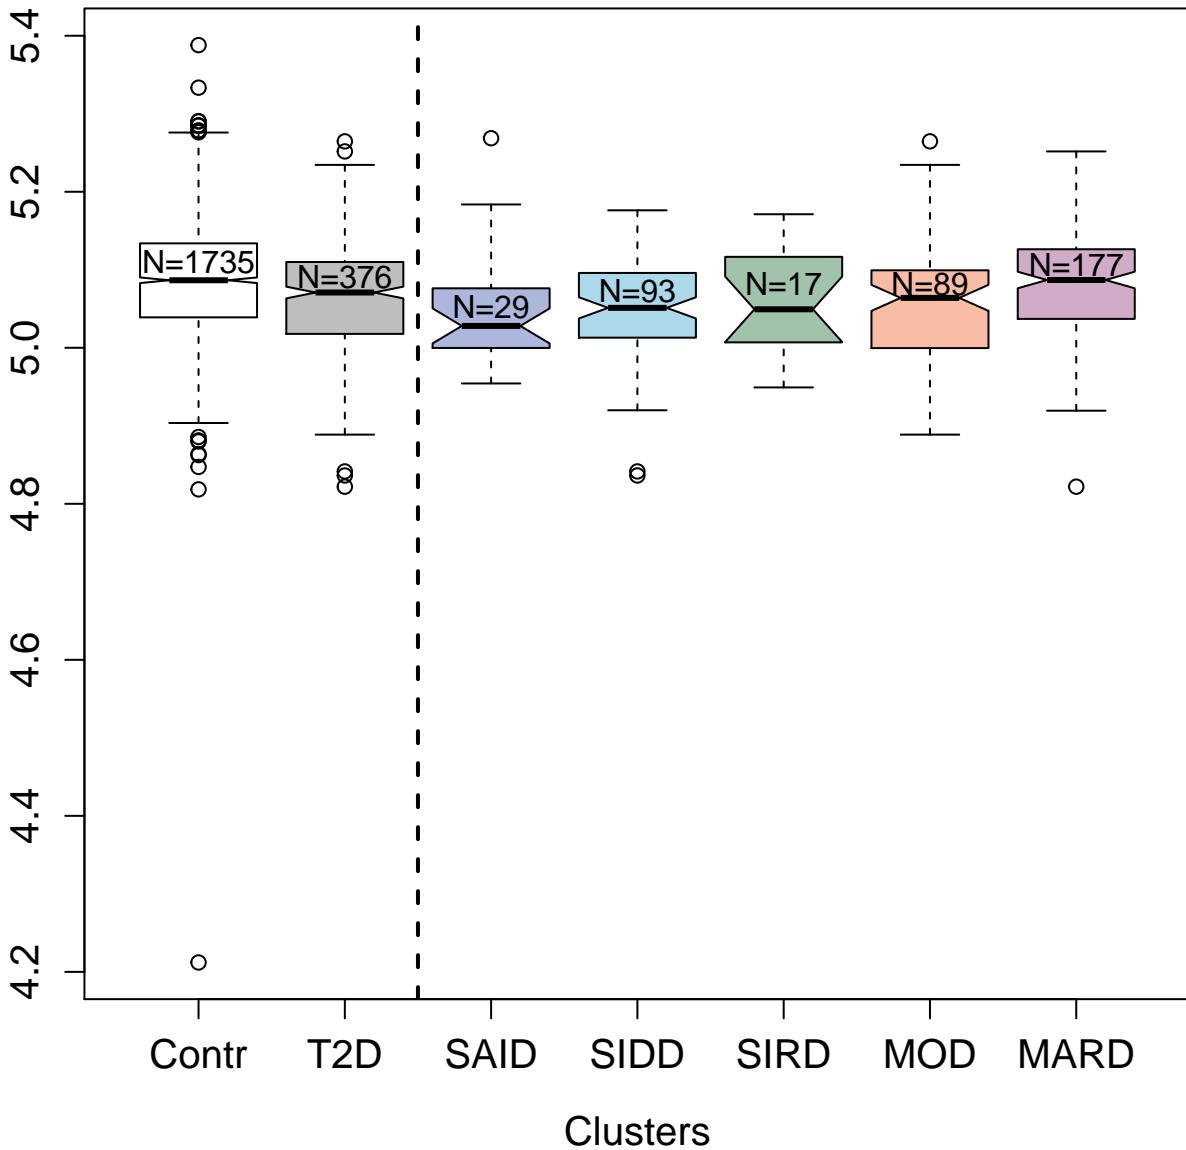

2665-26\_2 : Tumor necrosis factor receptor  
superfamily member 17

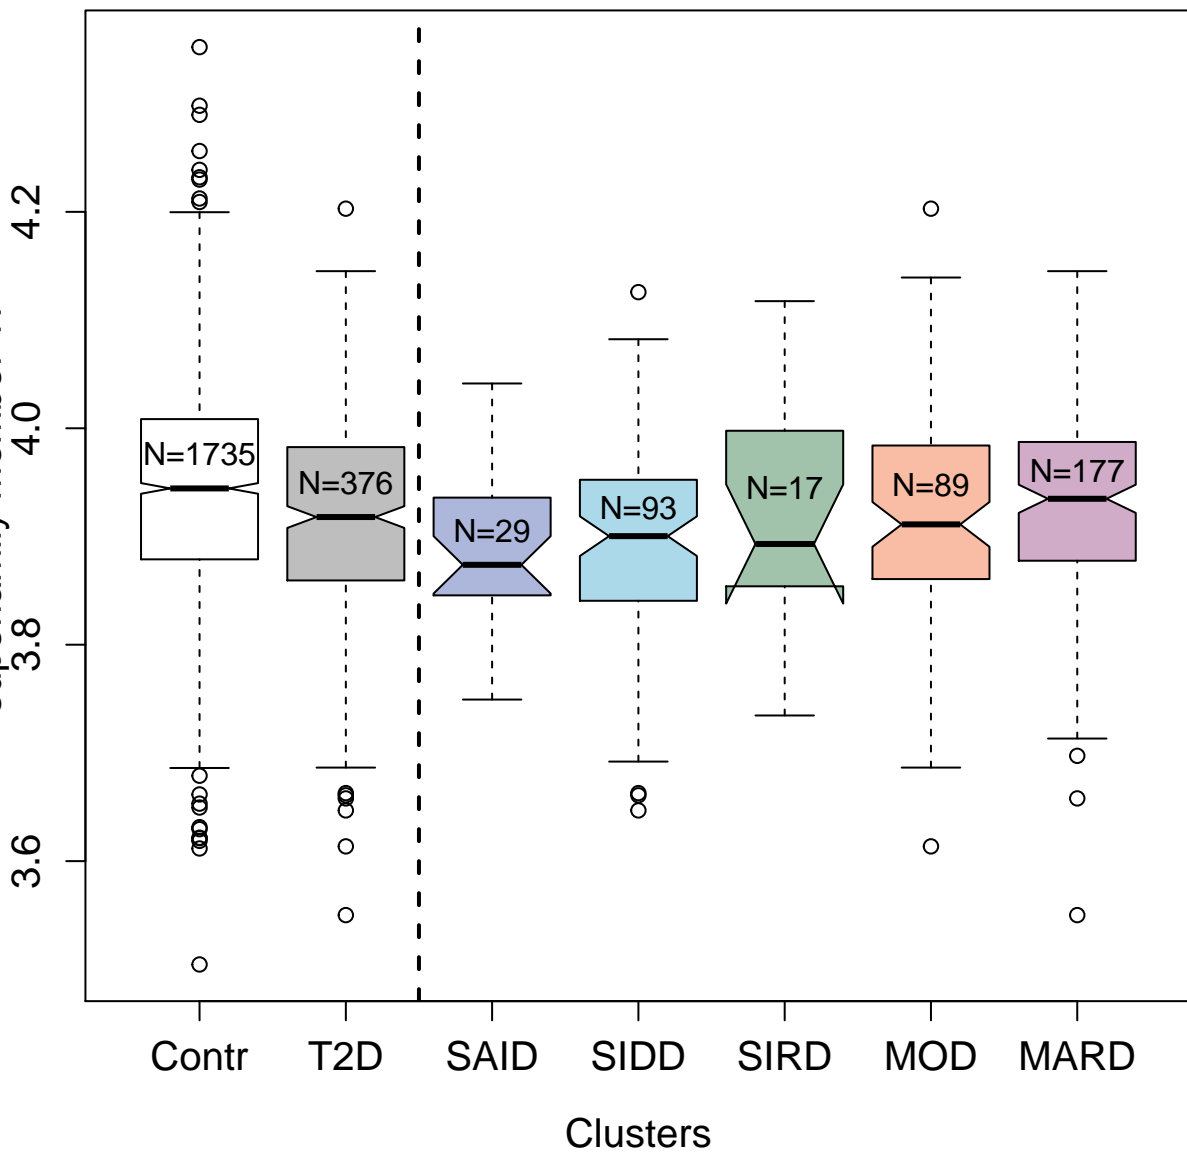

3508-78\_3 : C-C motif chemokine 22

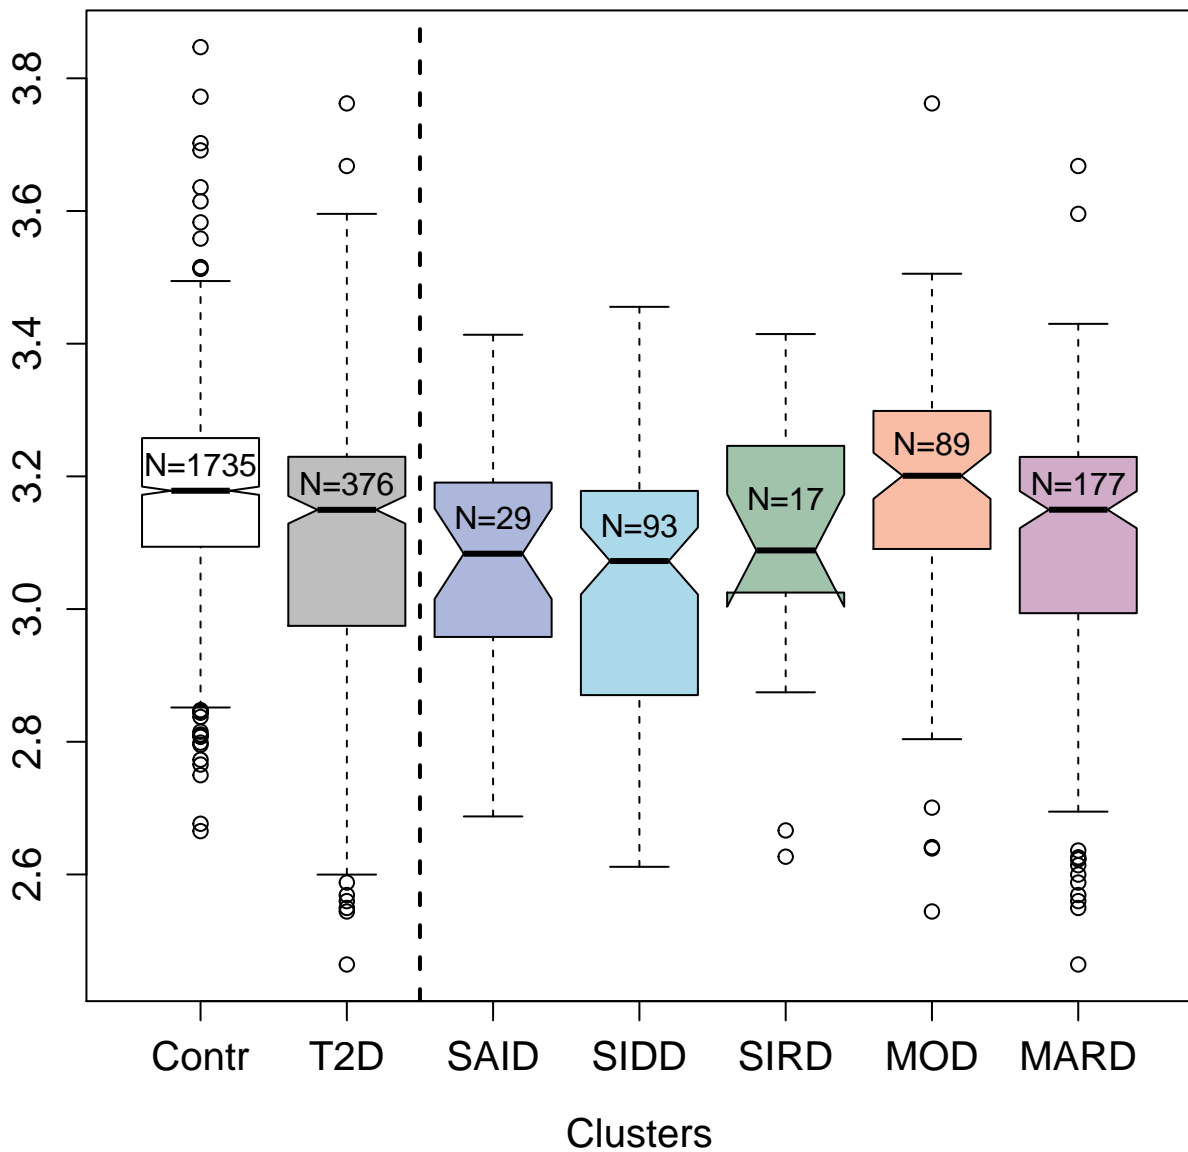

3505-6\_2 : Lymphotoxin alpha1:beta2

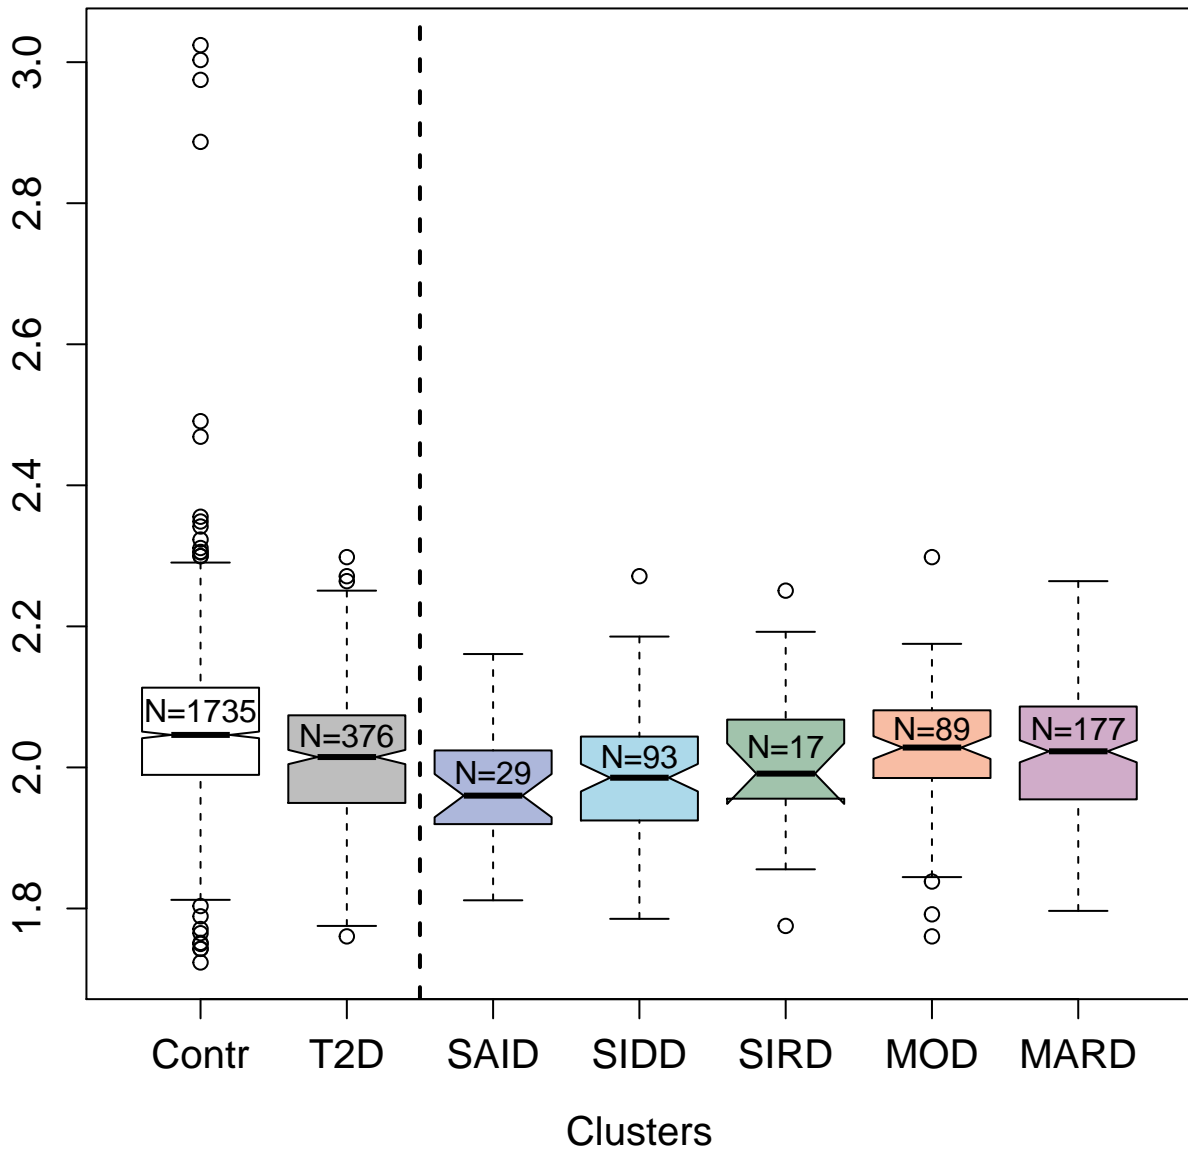

3379-29\_1 : Protein kinase C iota type

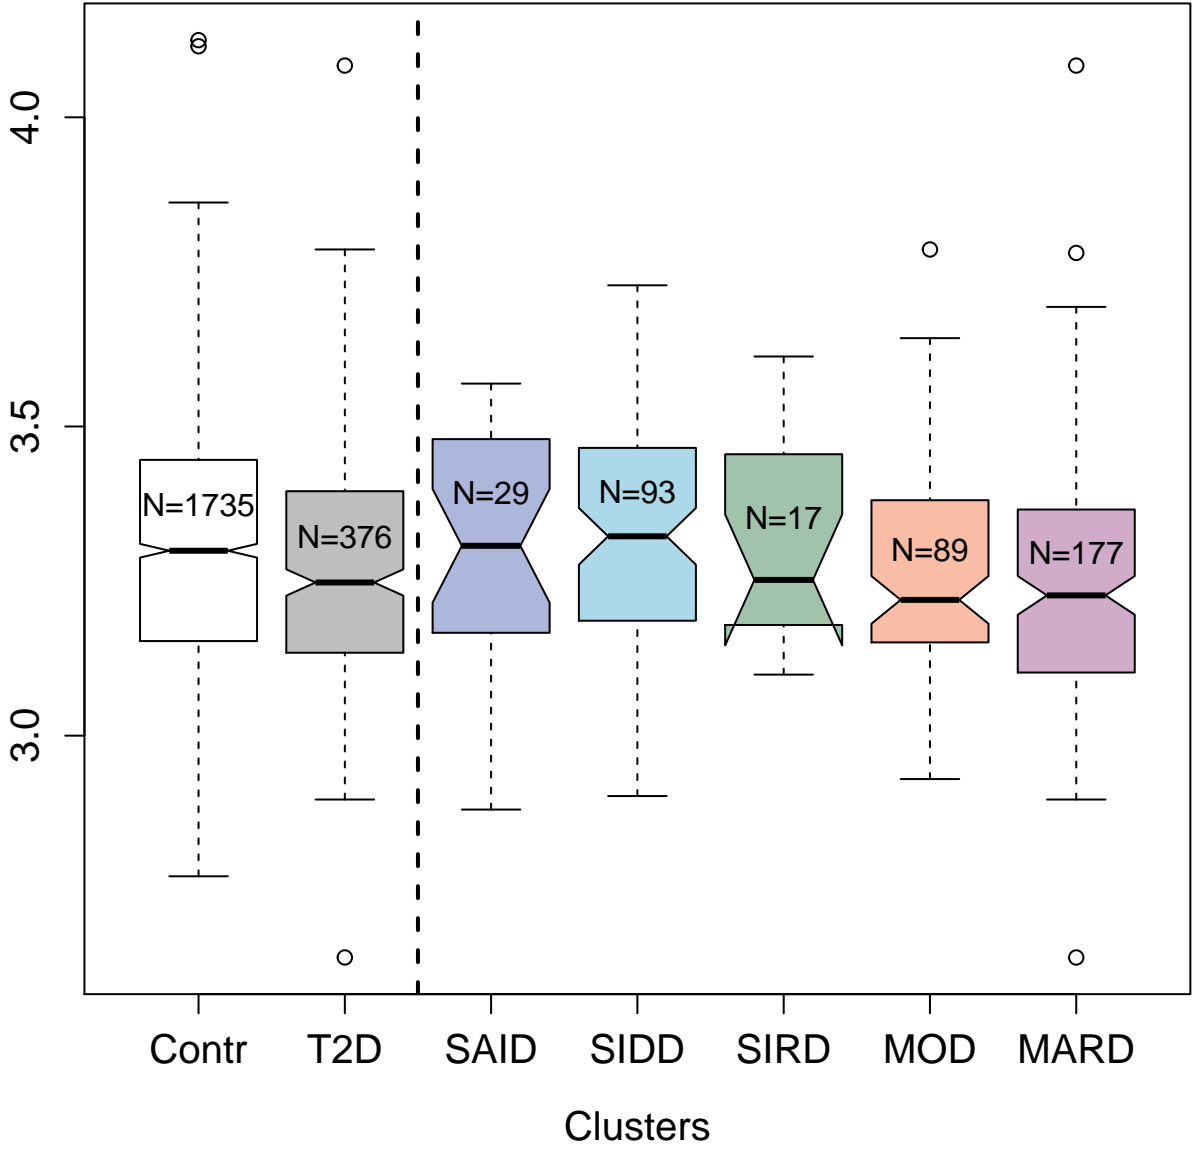

3656-9\_1 : Cadherin-12

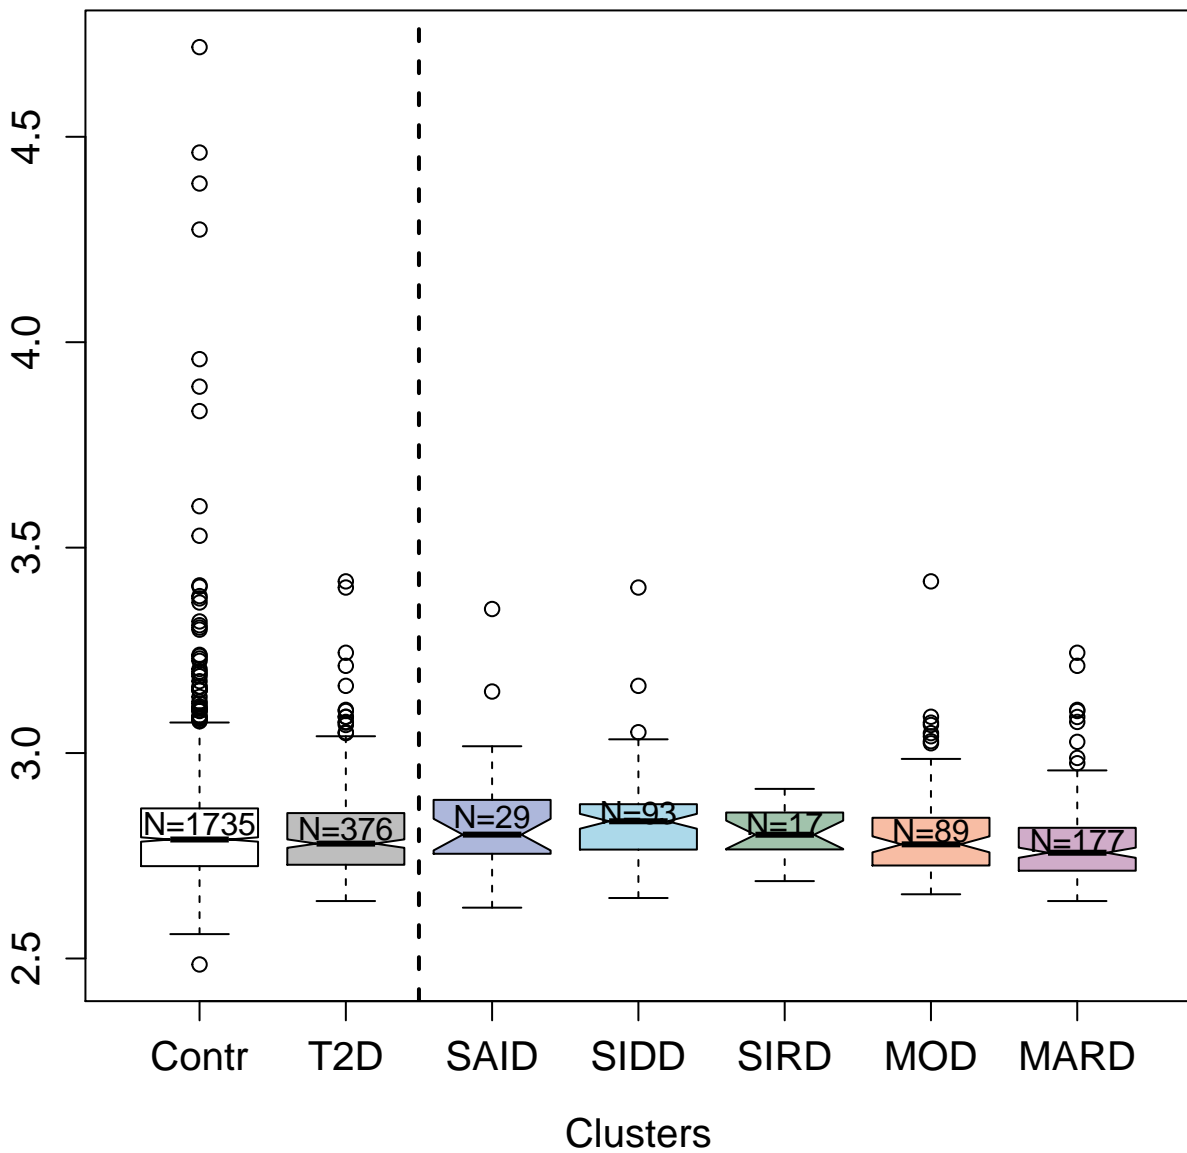



3030-3\_2 : C-type lectin domain family 4 member M

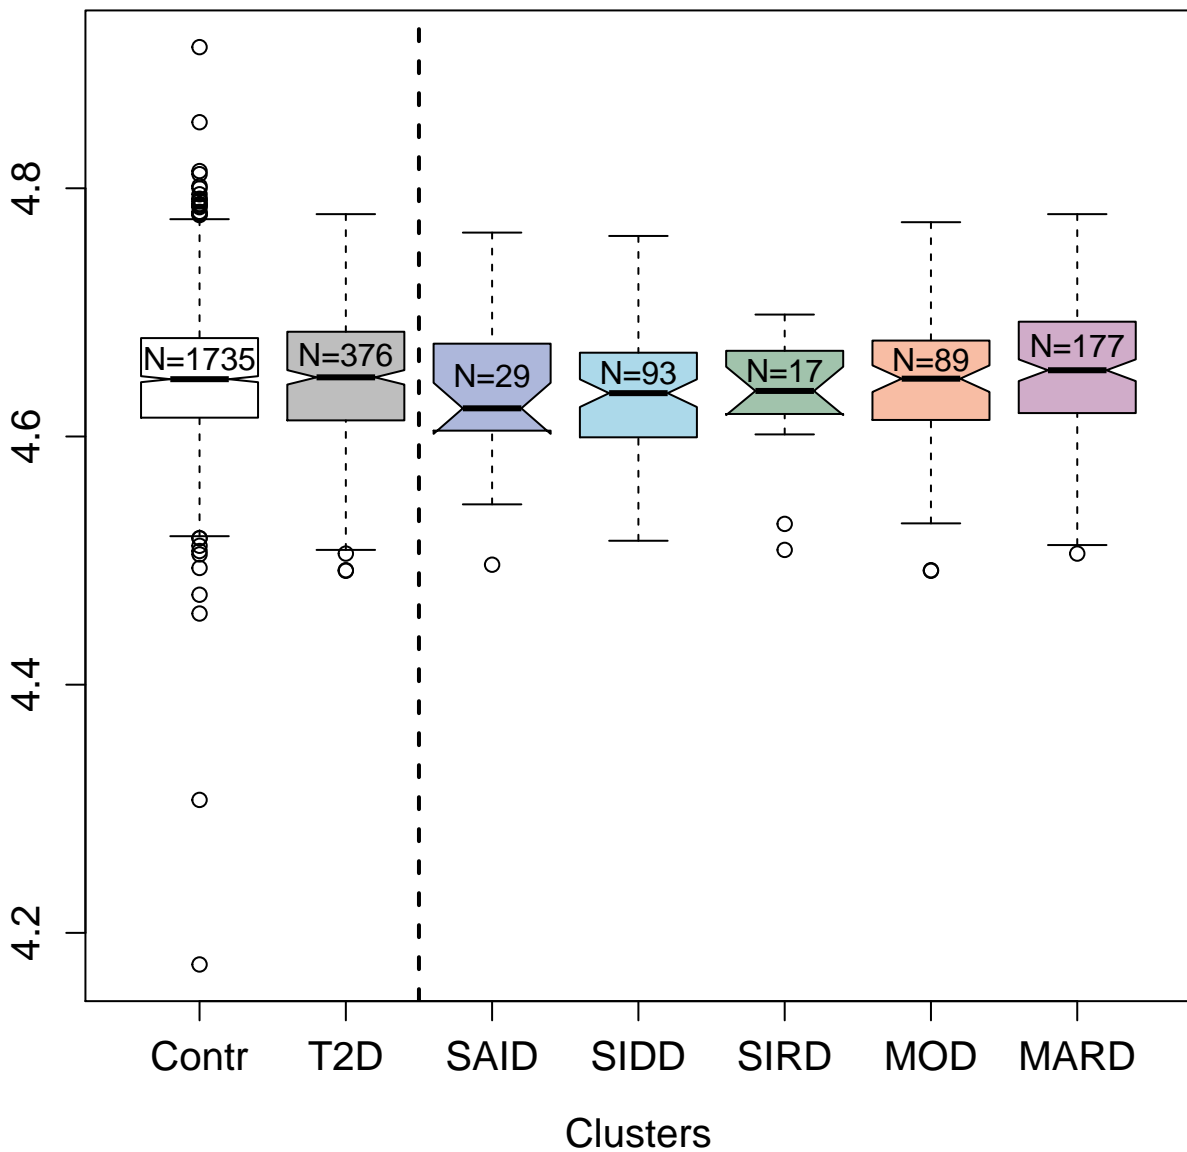

3896-5\_2 : Phosphoglycerate mutase 1

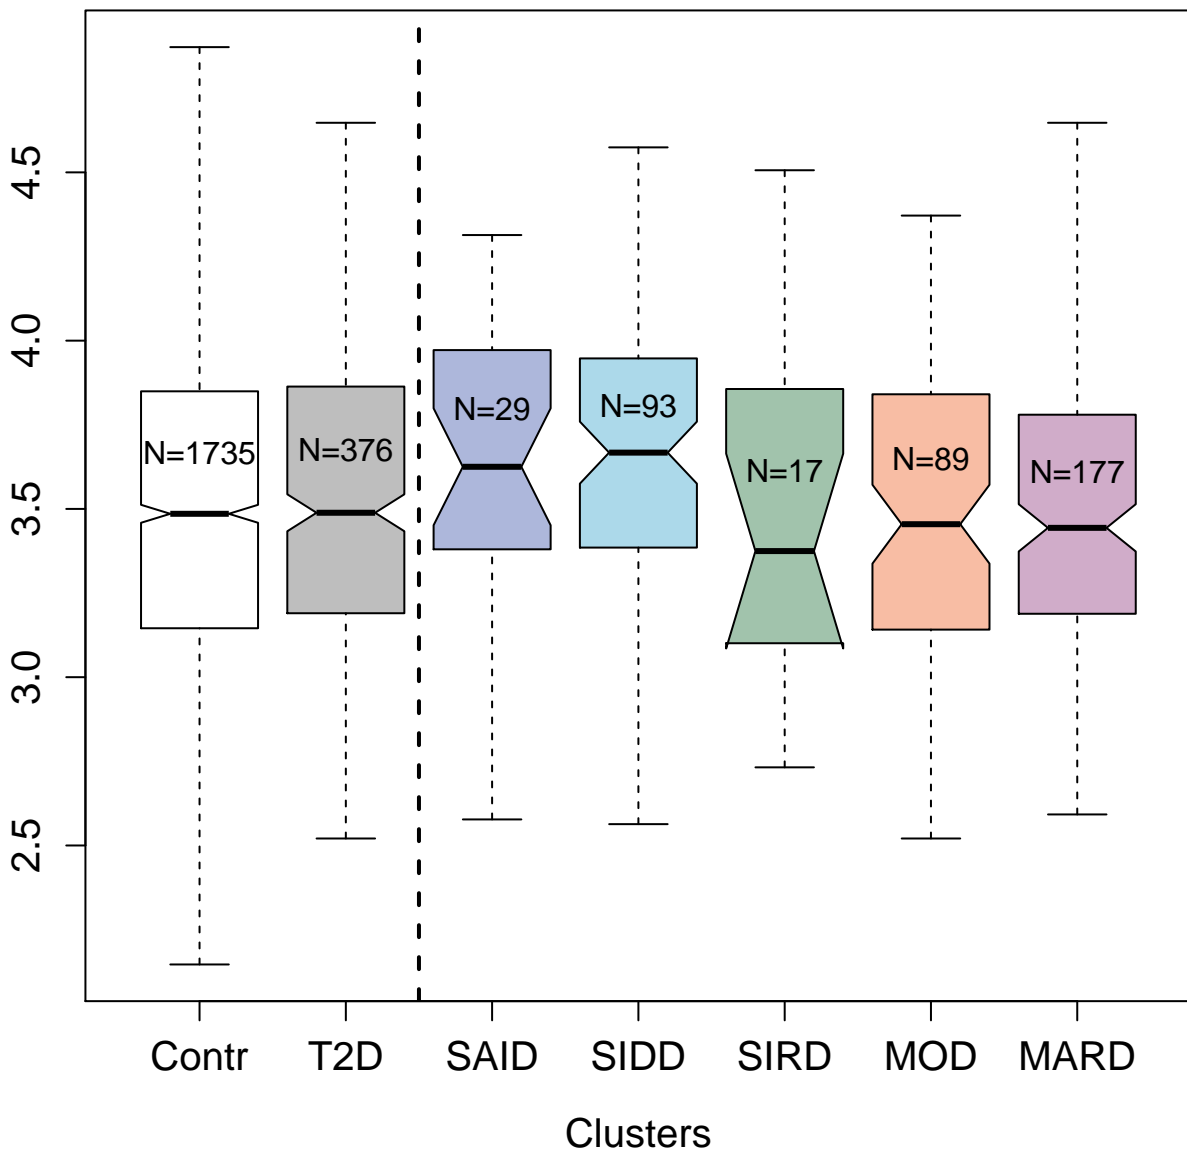

4148-49\_2 : Pappalysin-1

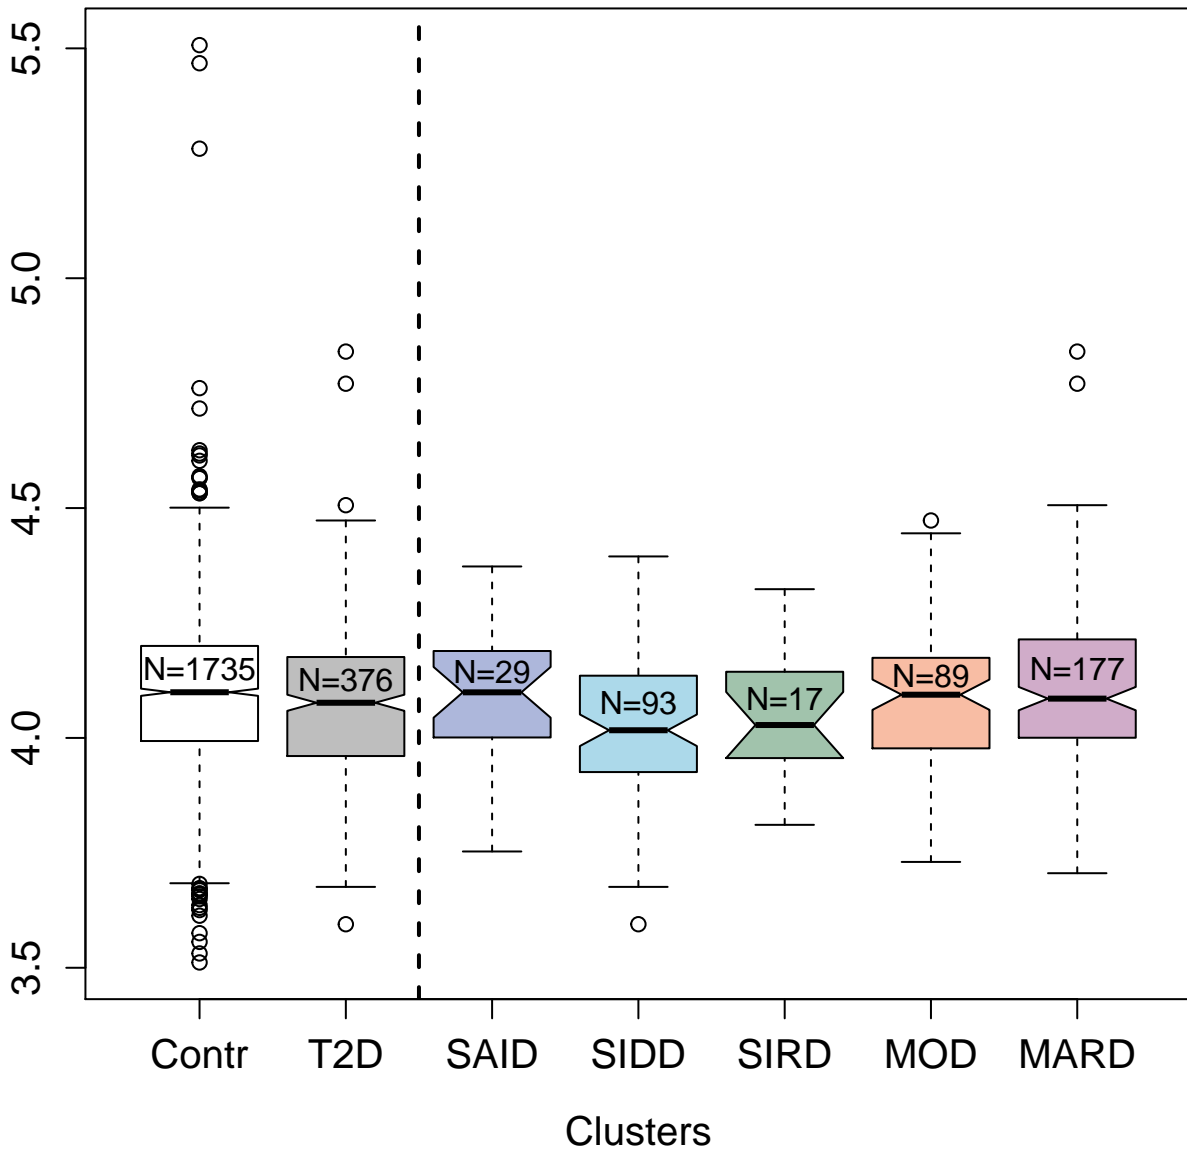

3485-28\_2 : Beta-2-microglobulin

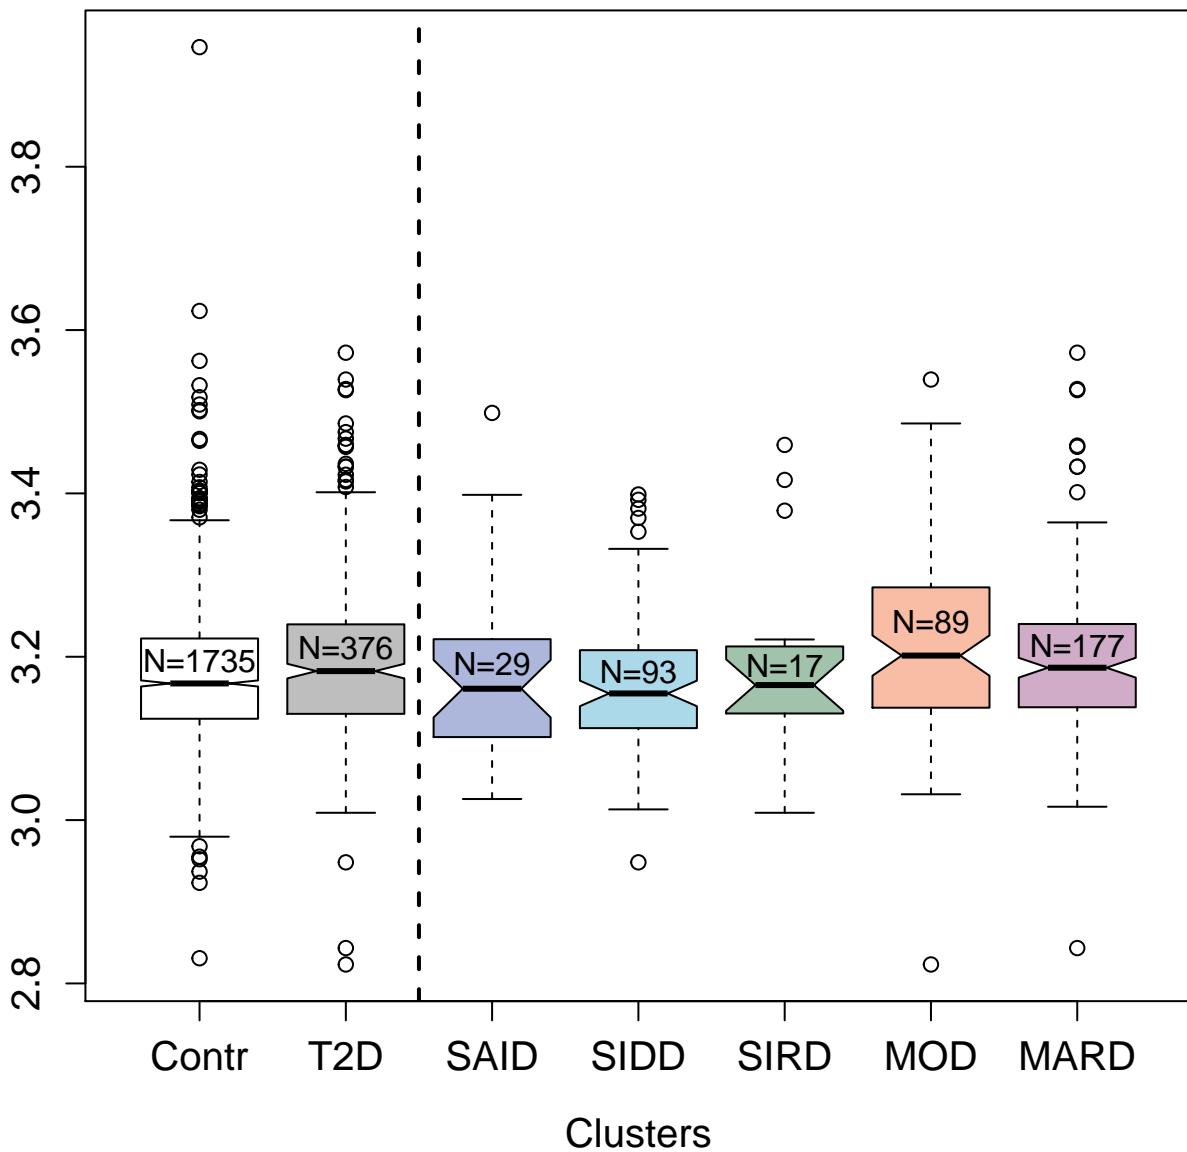

4815-25\_3 : Thioredoxin domain-containing protein

12

4.0

3.5

3.0

Contr

T2D

SAID

SIDD

SIRD

MOD

MARD

Clusters

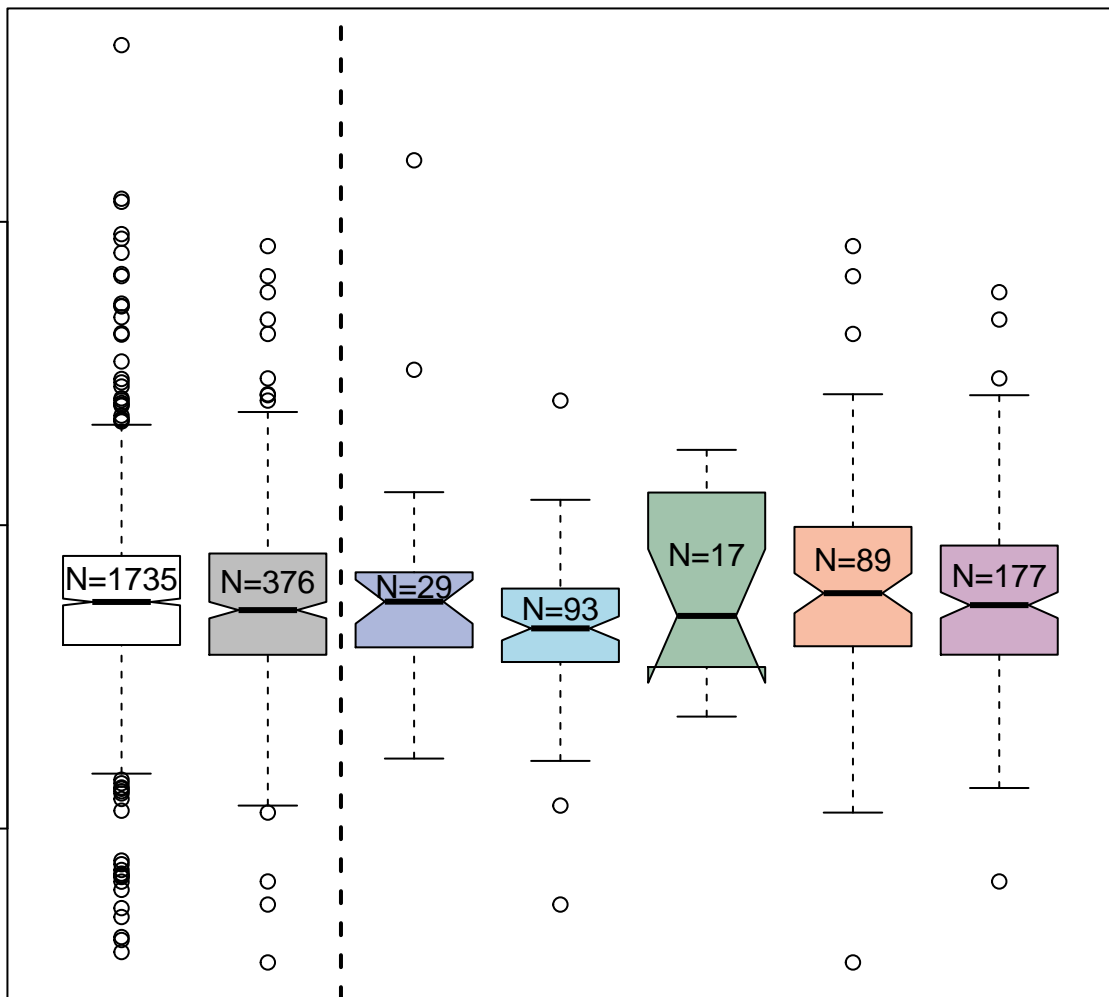

13095-51\_3 : Lithostathine-1-alpha

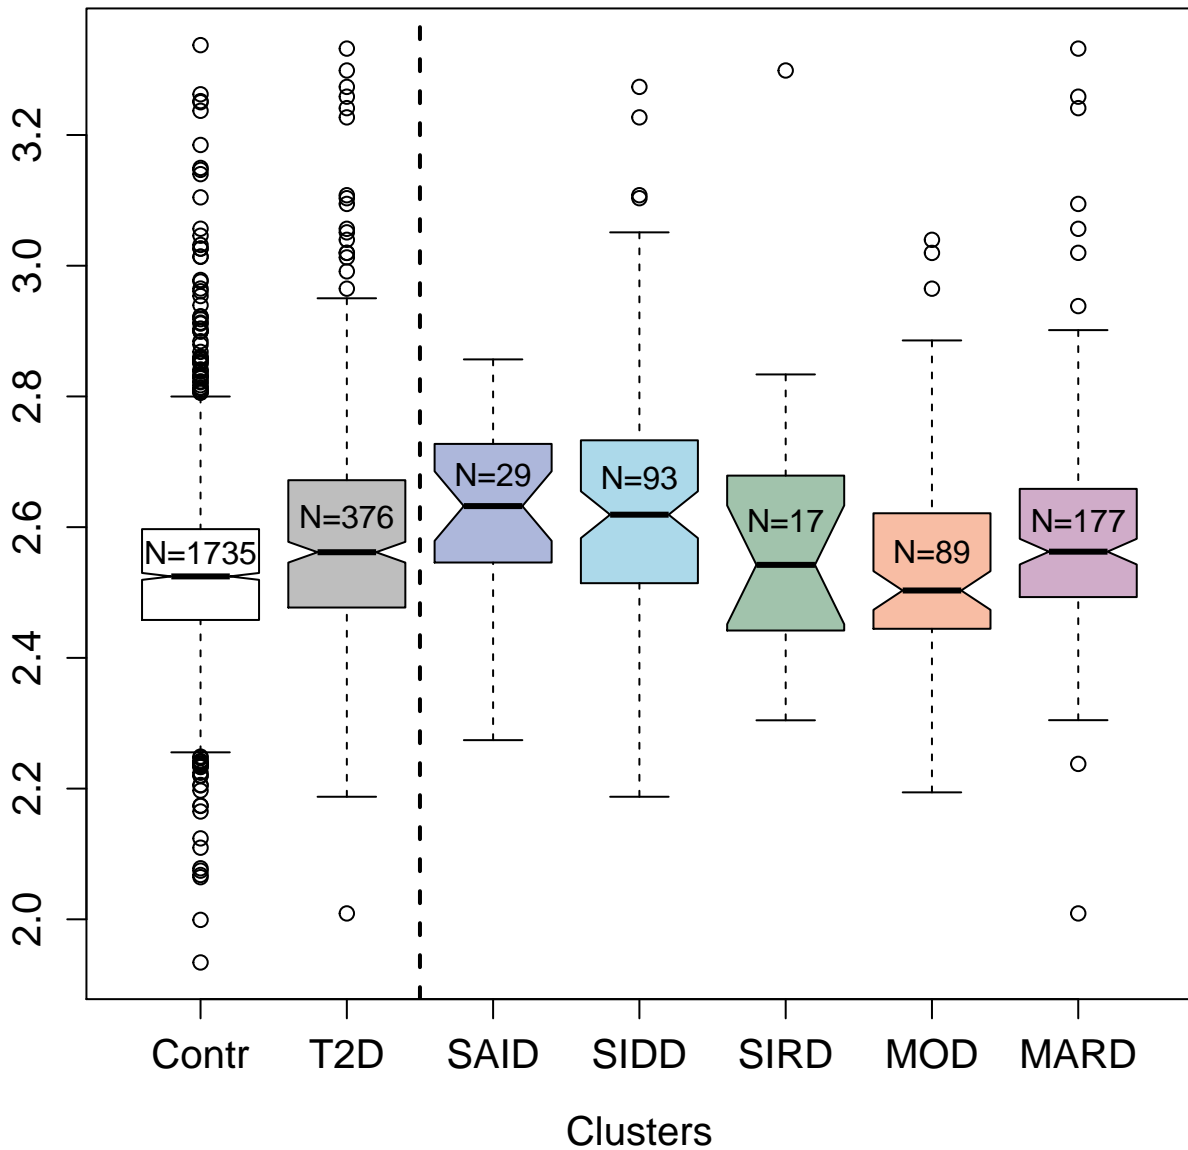

4500-50\_2 : Stem cell growth factor-alpha

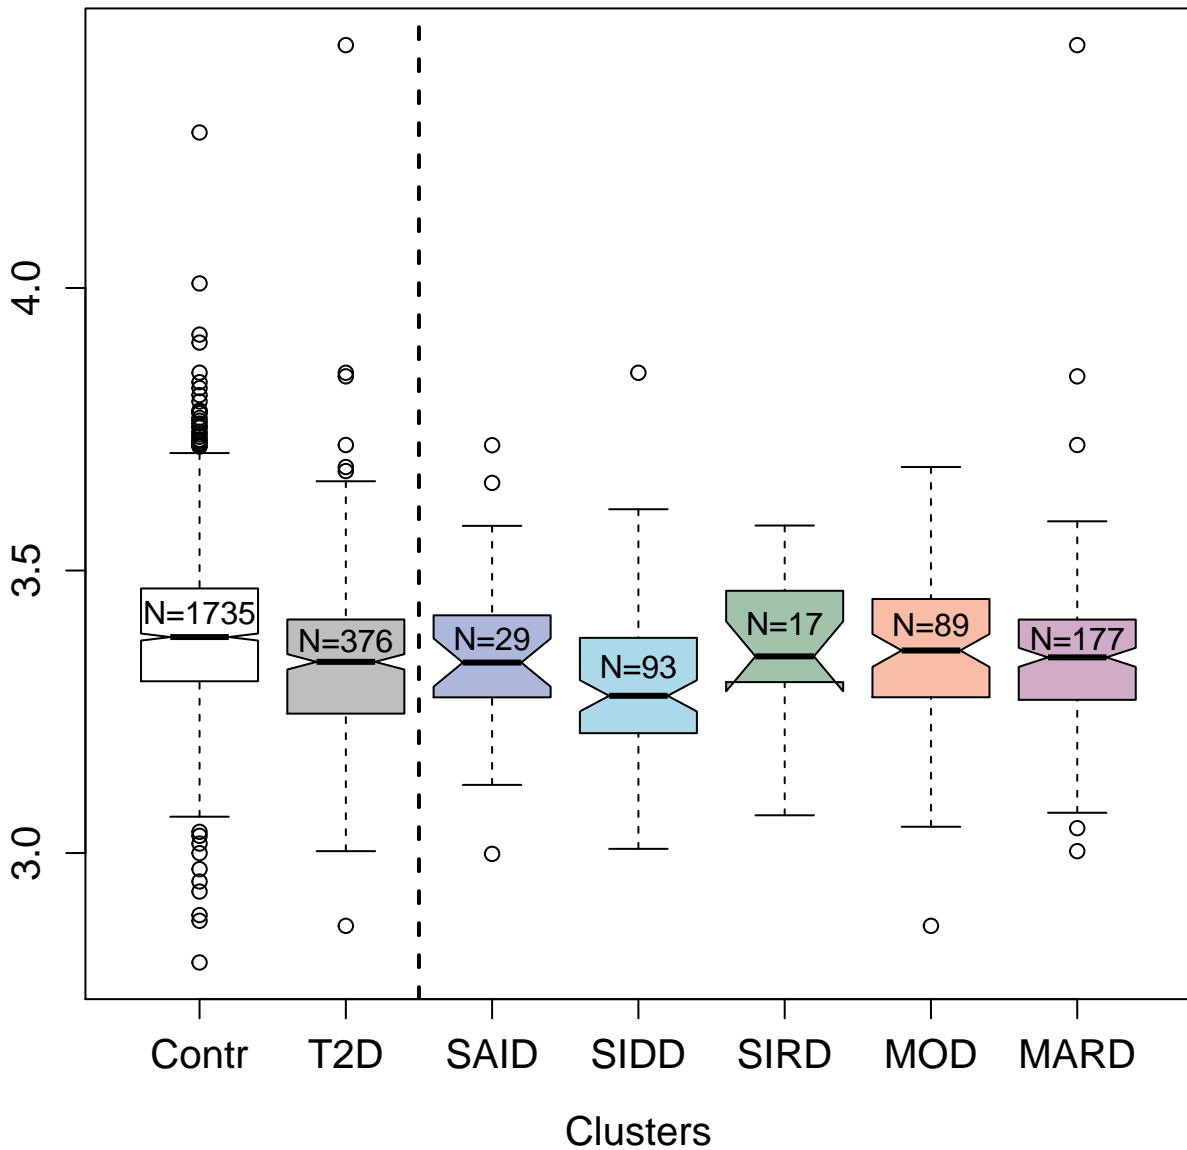

14153-8\_3 : Ephrin-A3

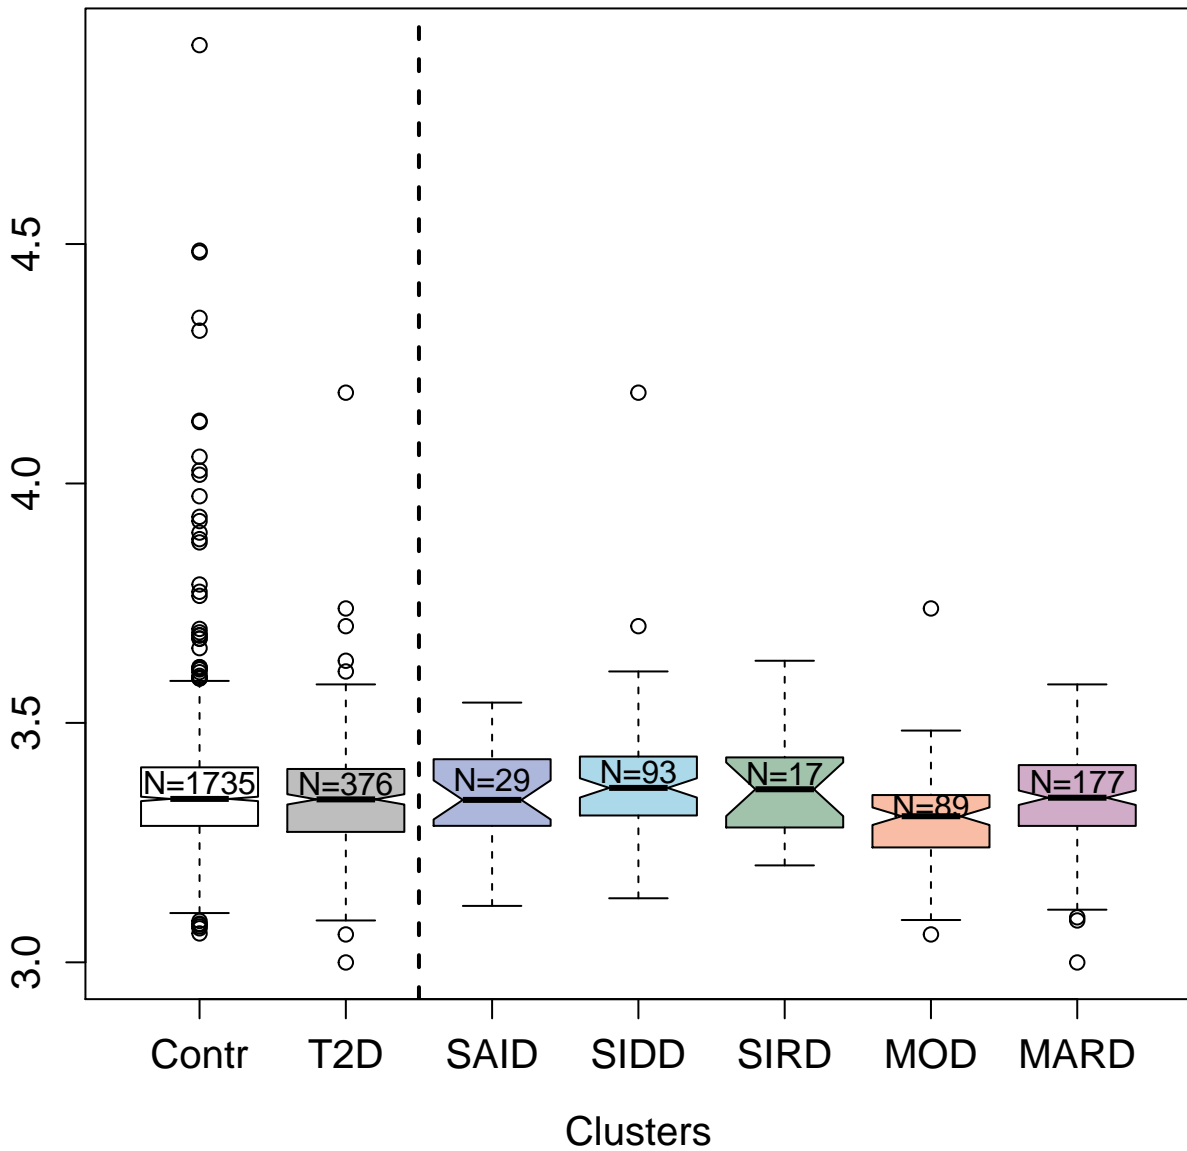



5132-71\_3 : Interleukin-27 receptor subunit alpha

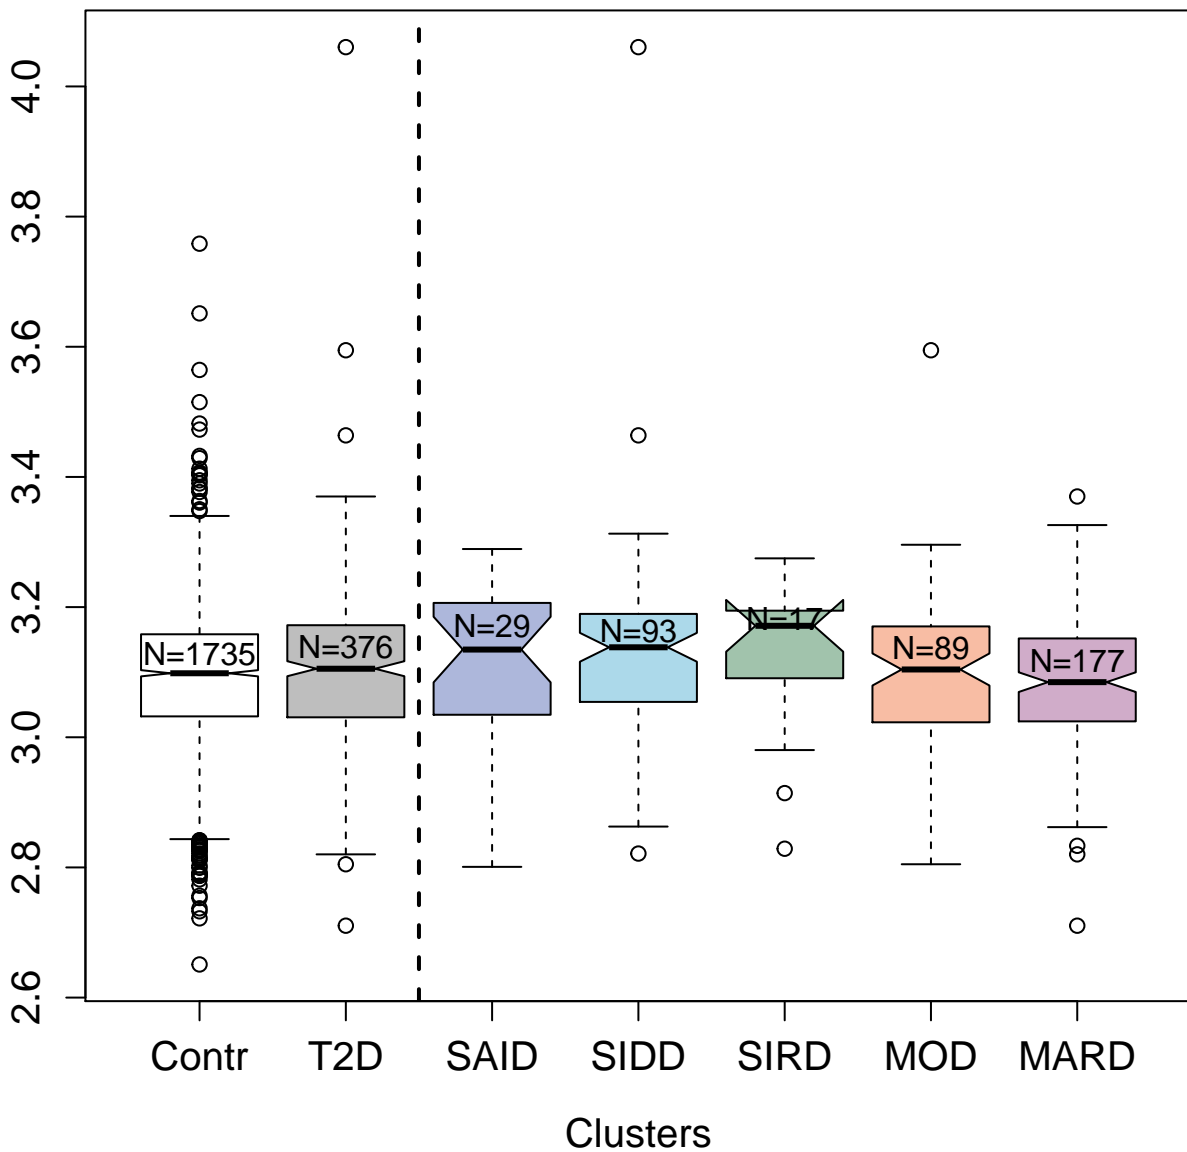

3332-57\_1 : Hemojuvelin

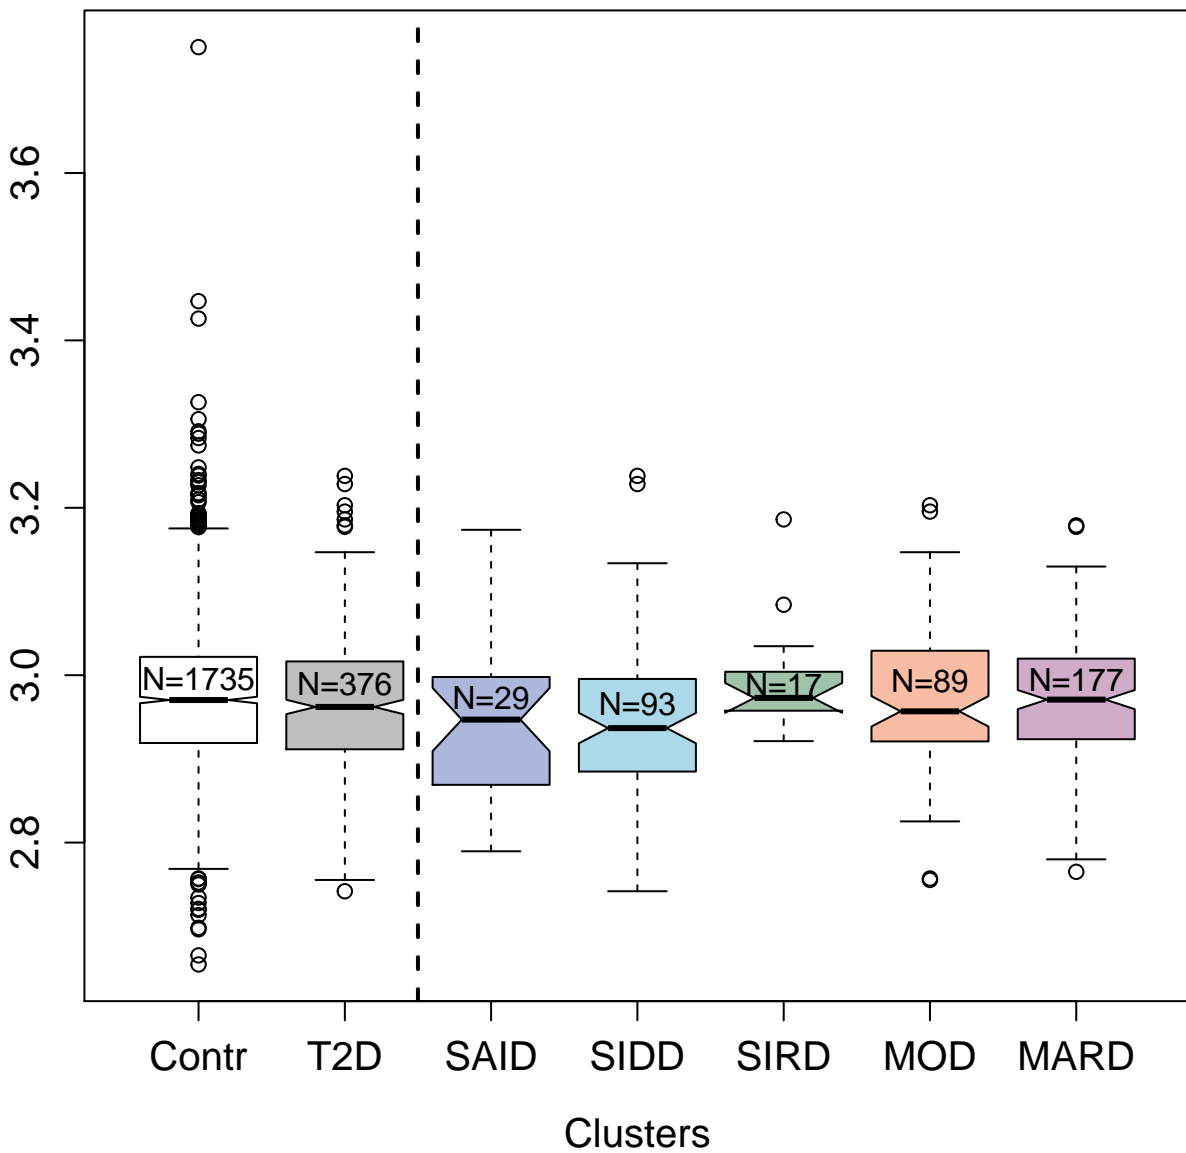

2558-51\_3 : Beta-endorphin

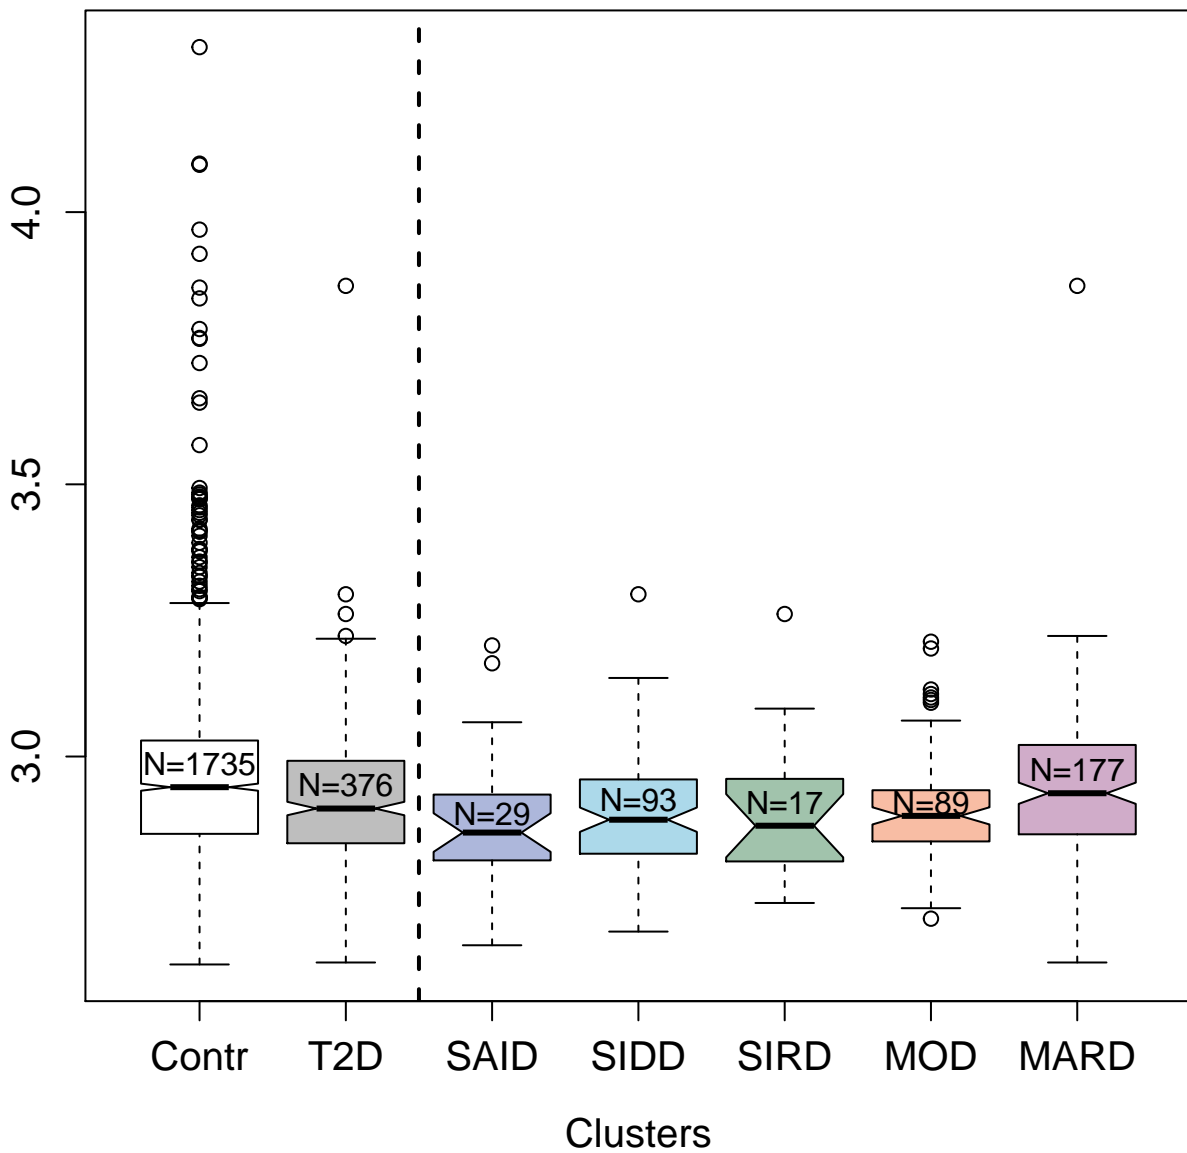

5404-53\_3 : Tumor necrosis factor receptor  
superfamily member 21

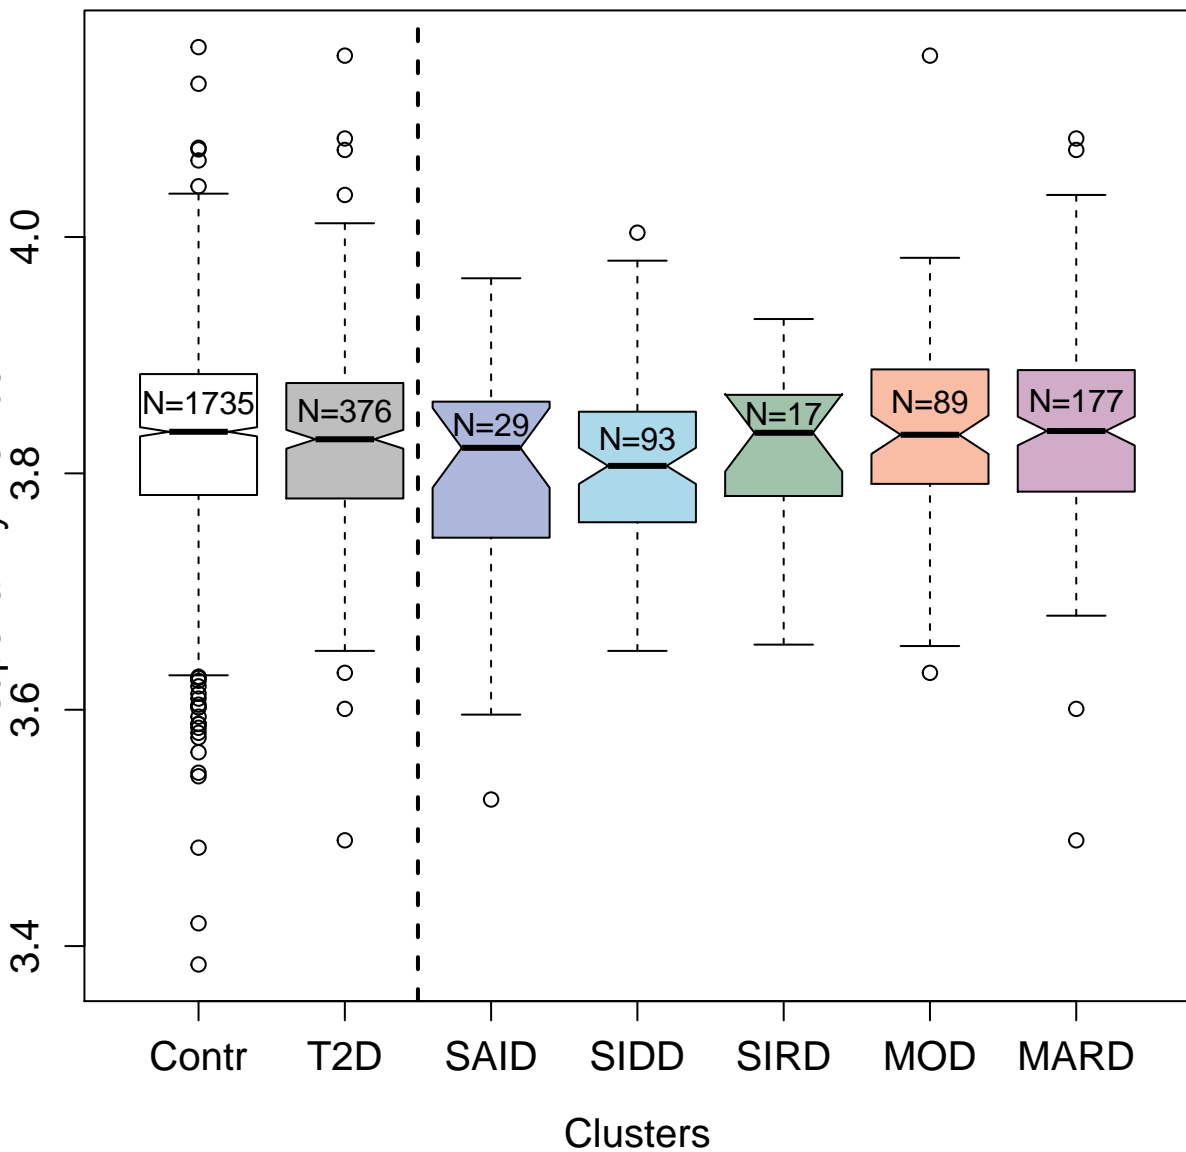



3518-54\_2 : Carboxypeptidase B2

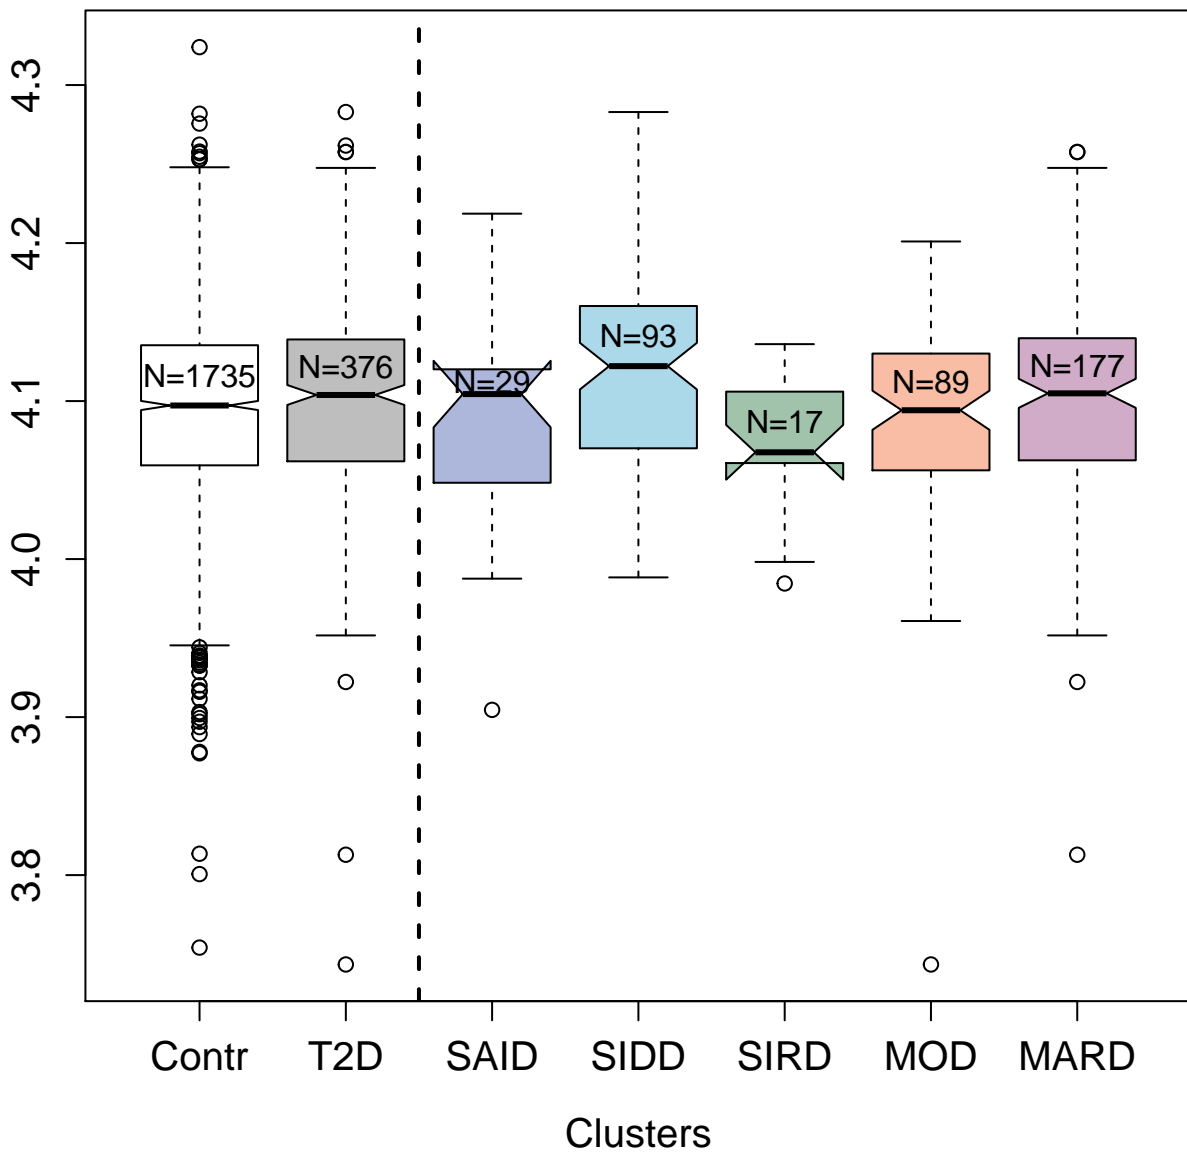

5392-73\_2 : Tumor necrosis factor receptor  
superfamily member 6

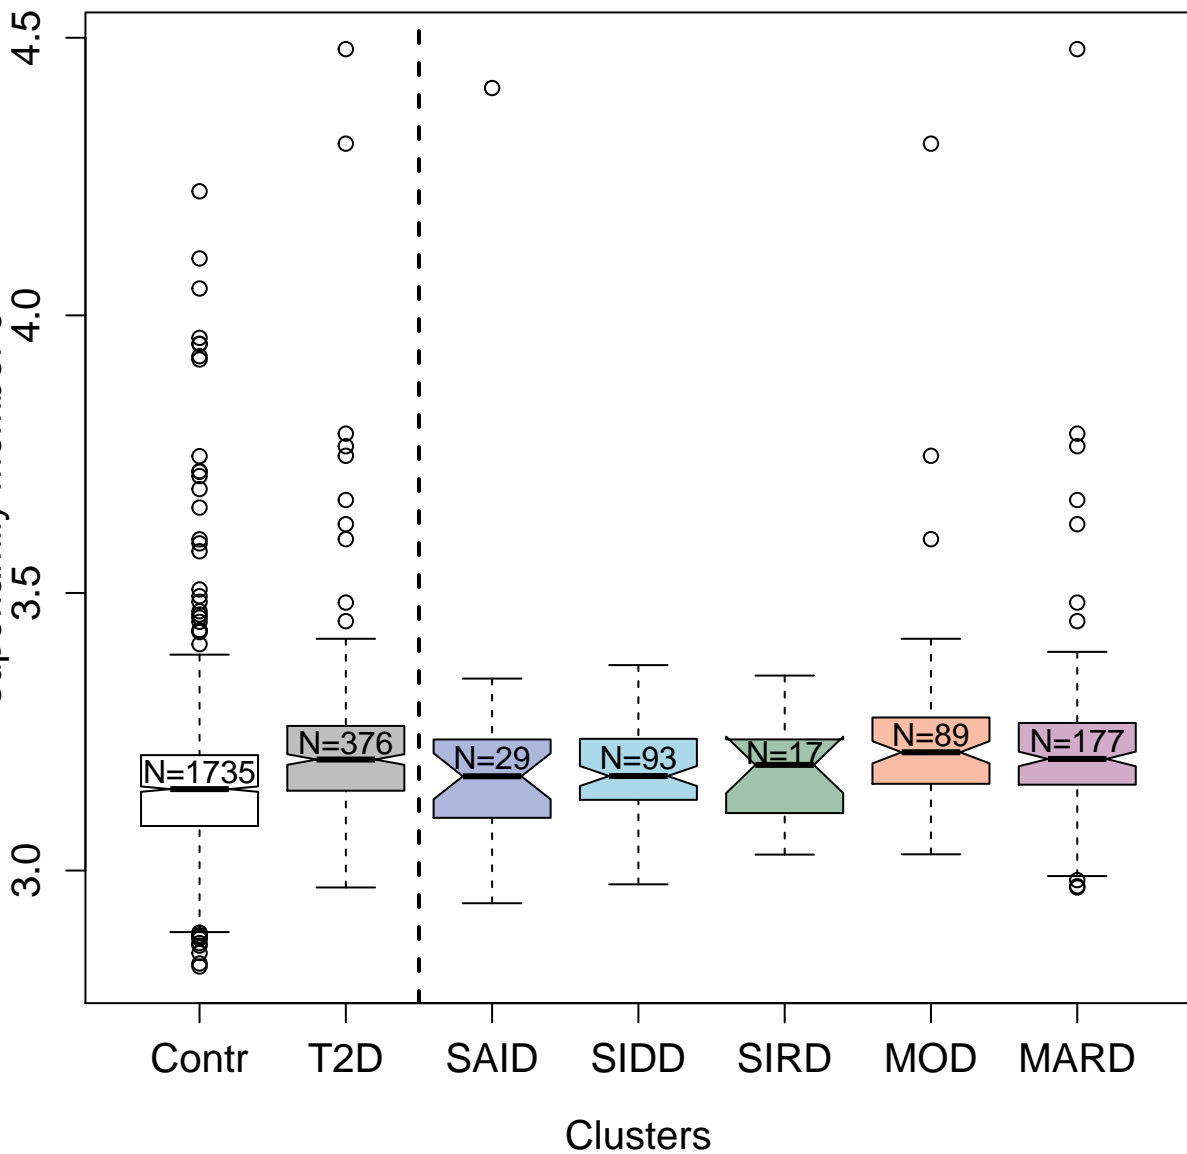

2585-2\_5 : Prolactin

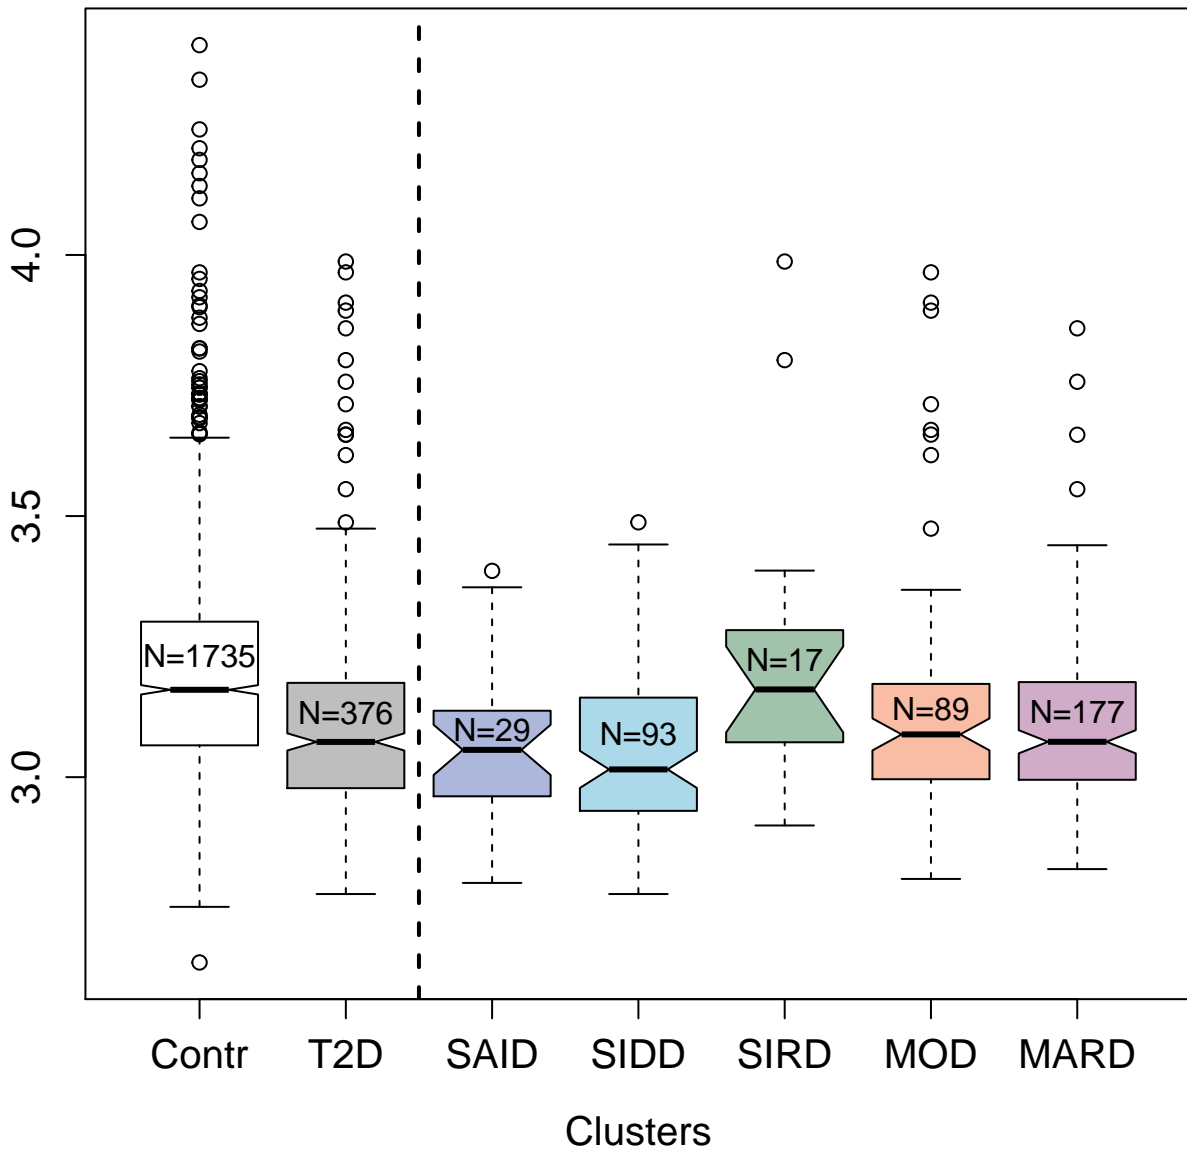



5339-49\_3 : Protein S100-A9

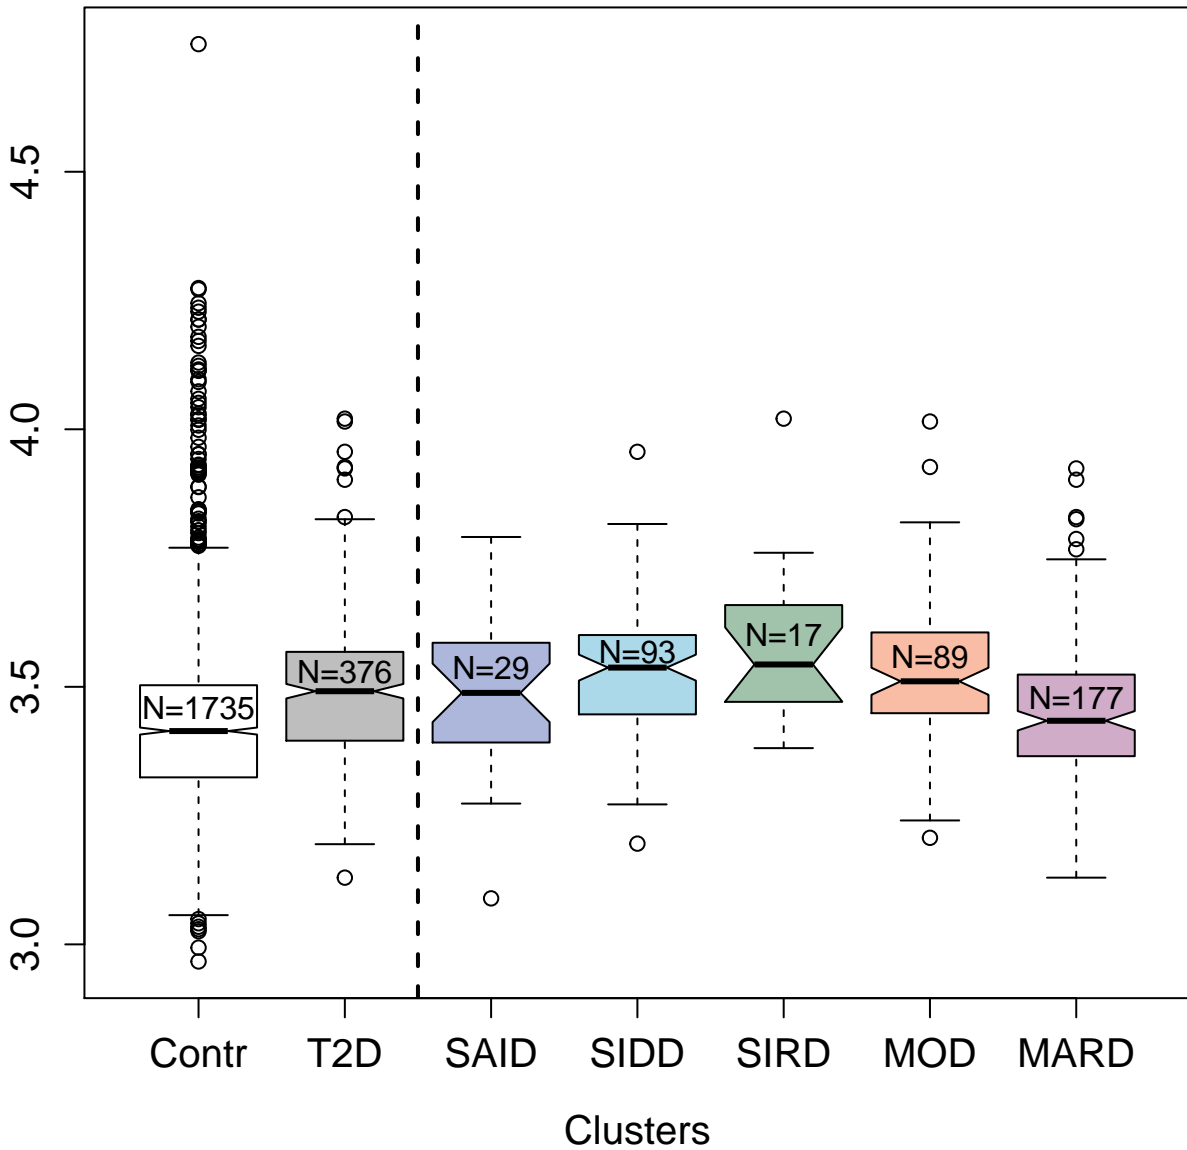

3481-87\_1 : Xaa-Pro aminopeptidase 1

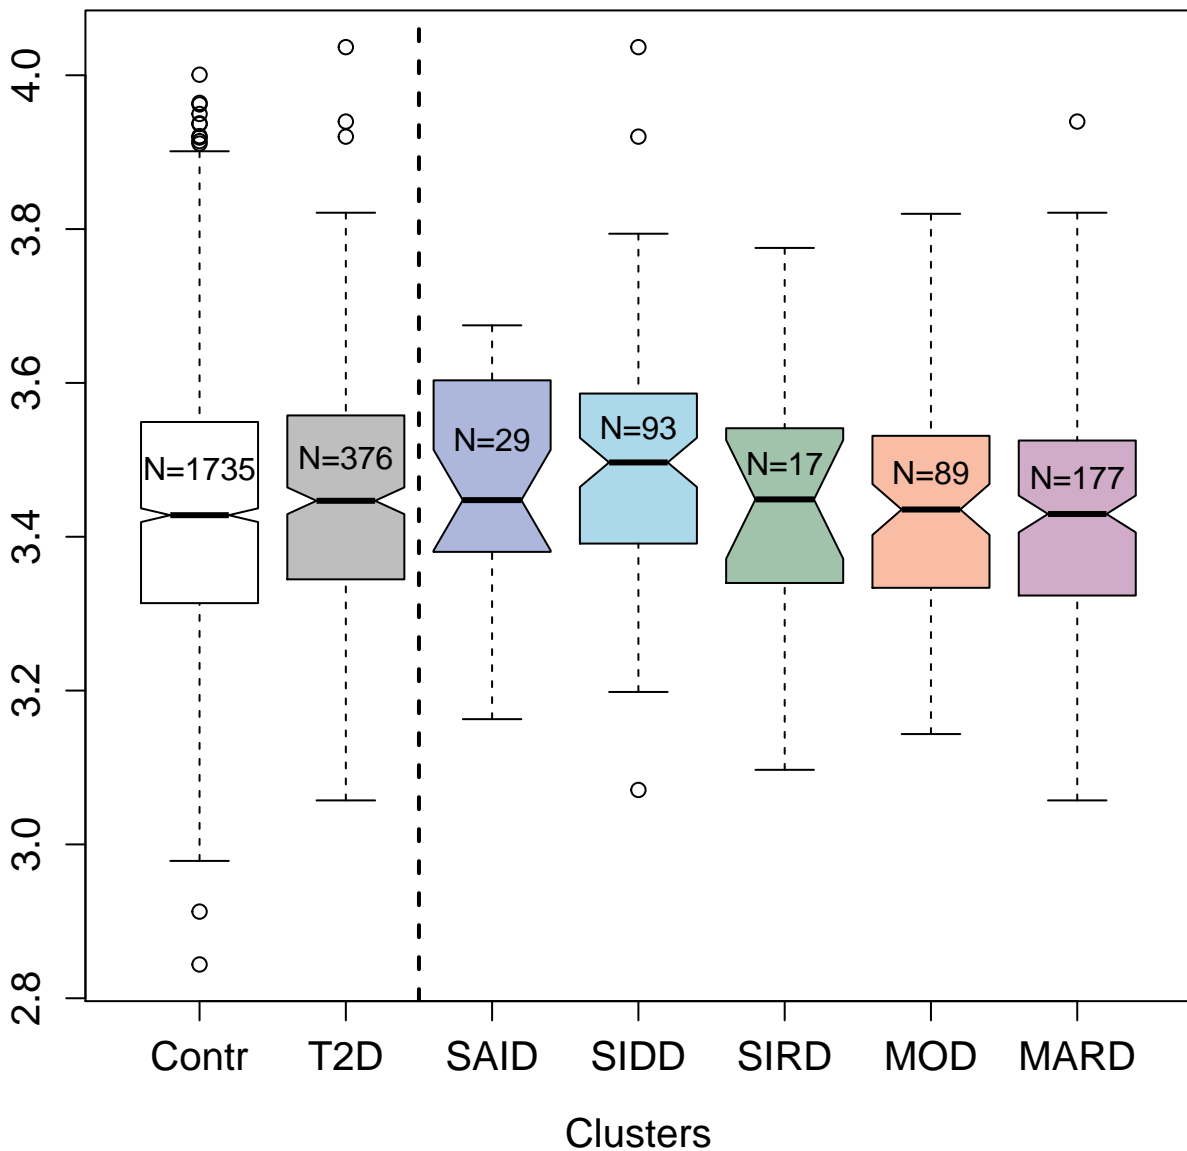

9188-119\_3 : C-X-C motif chemokine 9

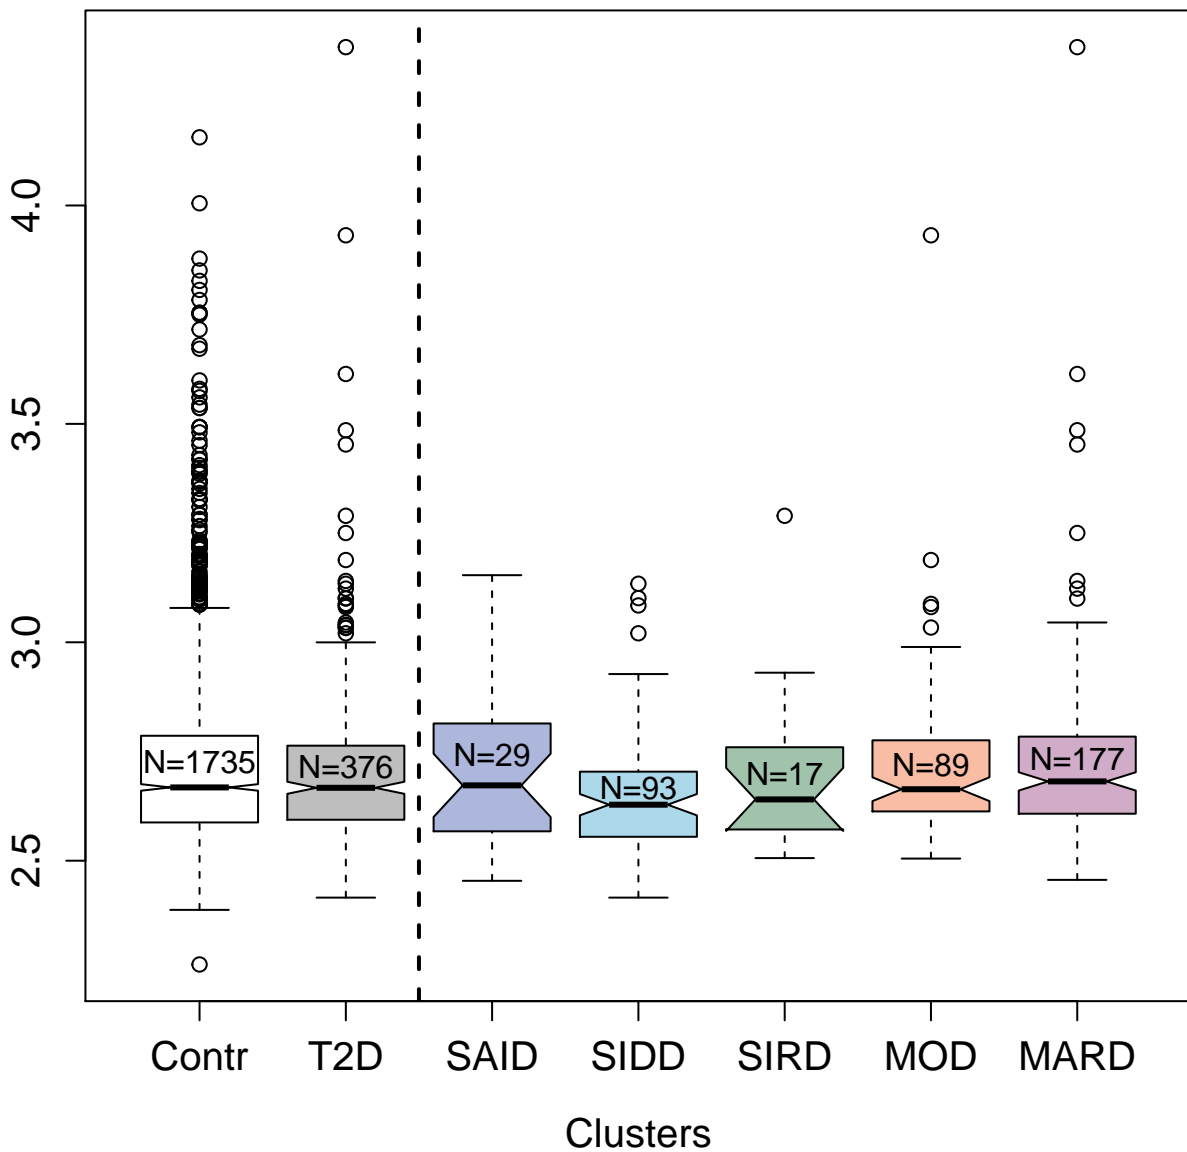

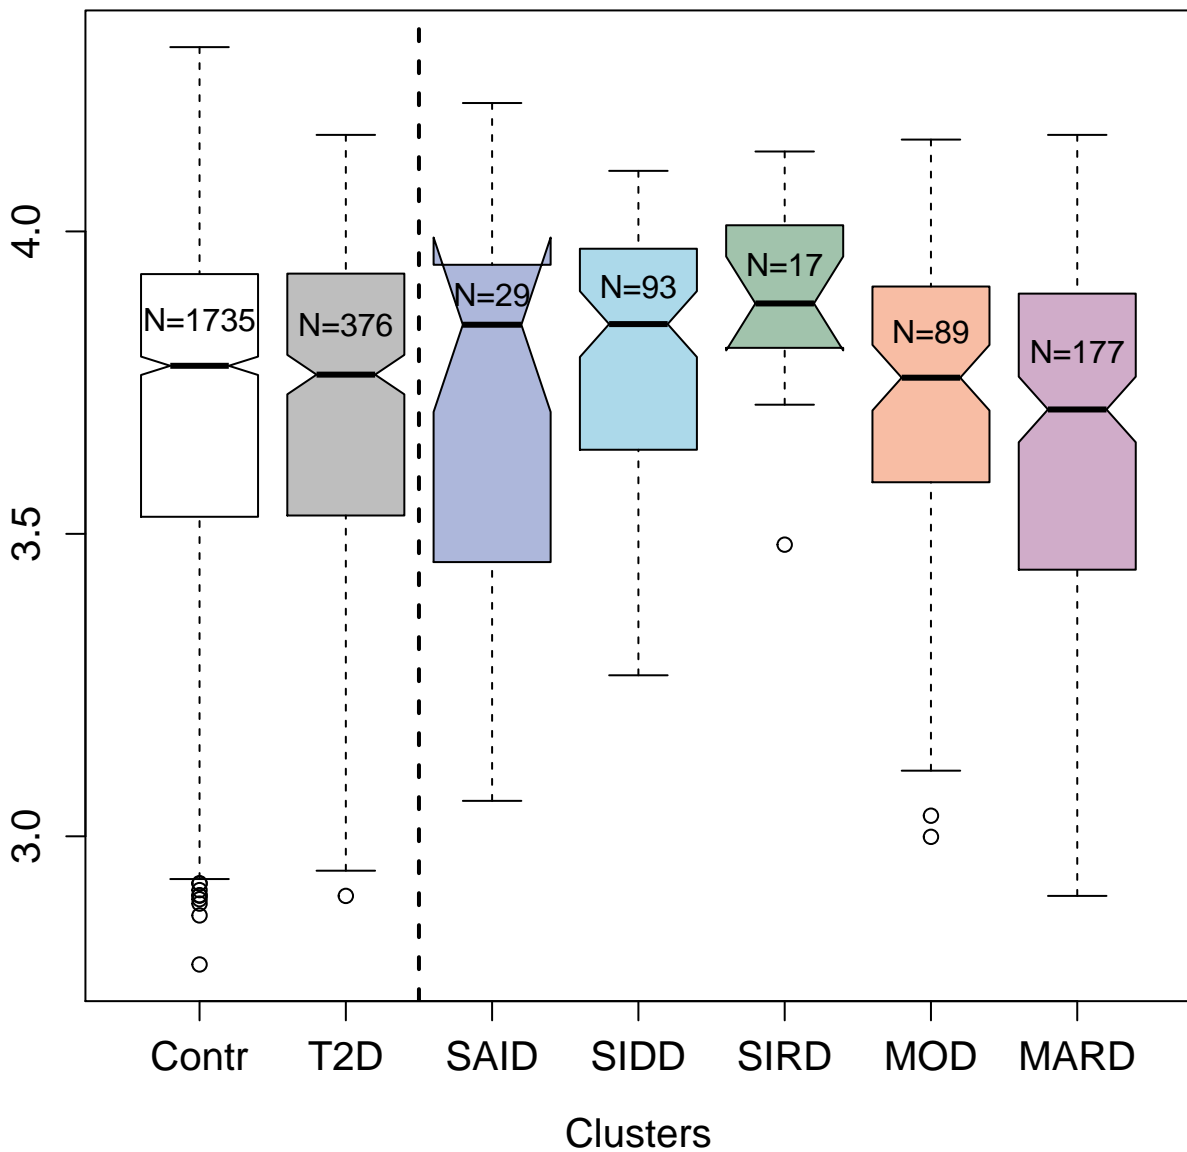

5843-60\_3 : Histone-lysine N-methyltransferase  
EHMT2

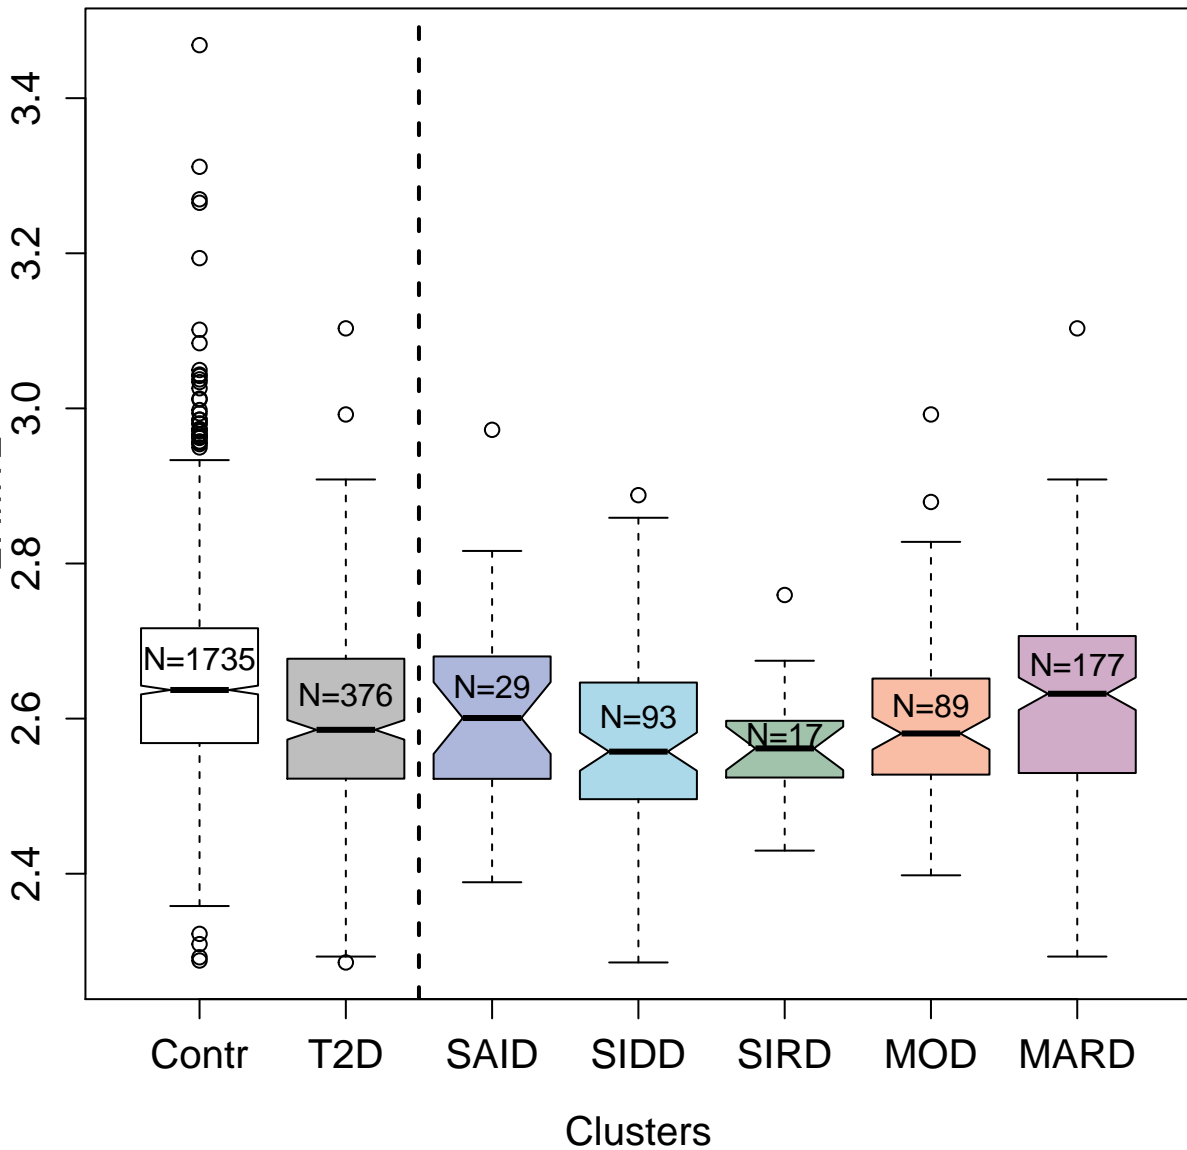

2635-61\_2 : Layilin

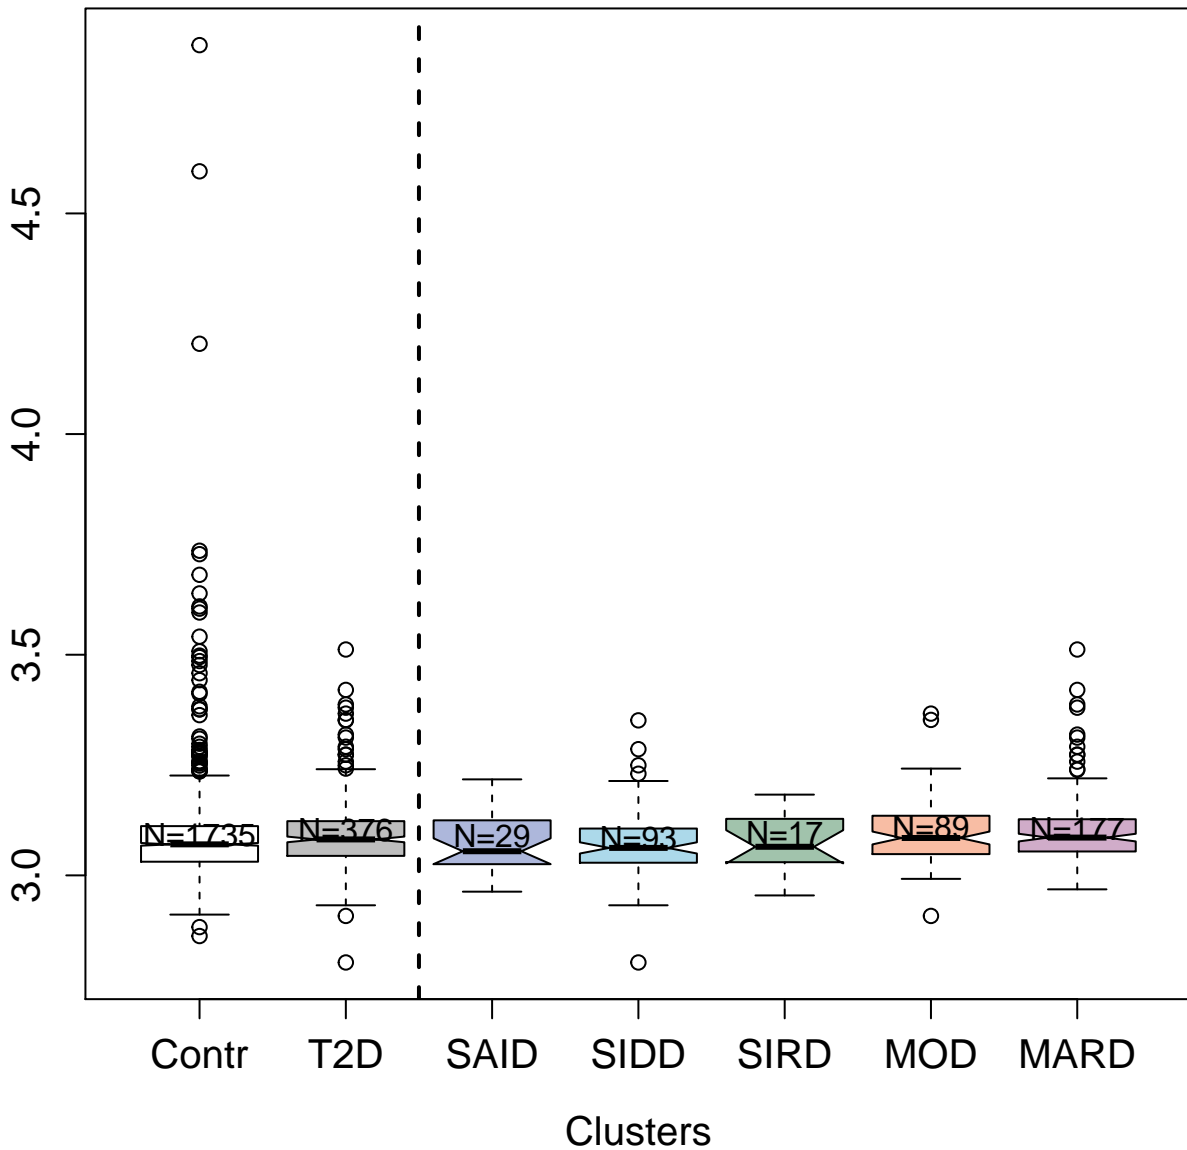

3296-92\_2 : Contactin-2

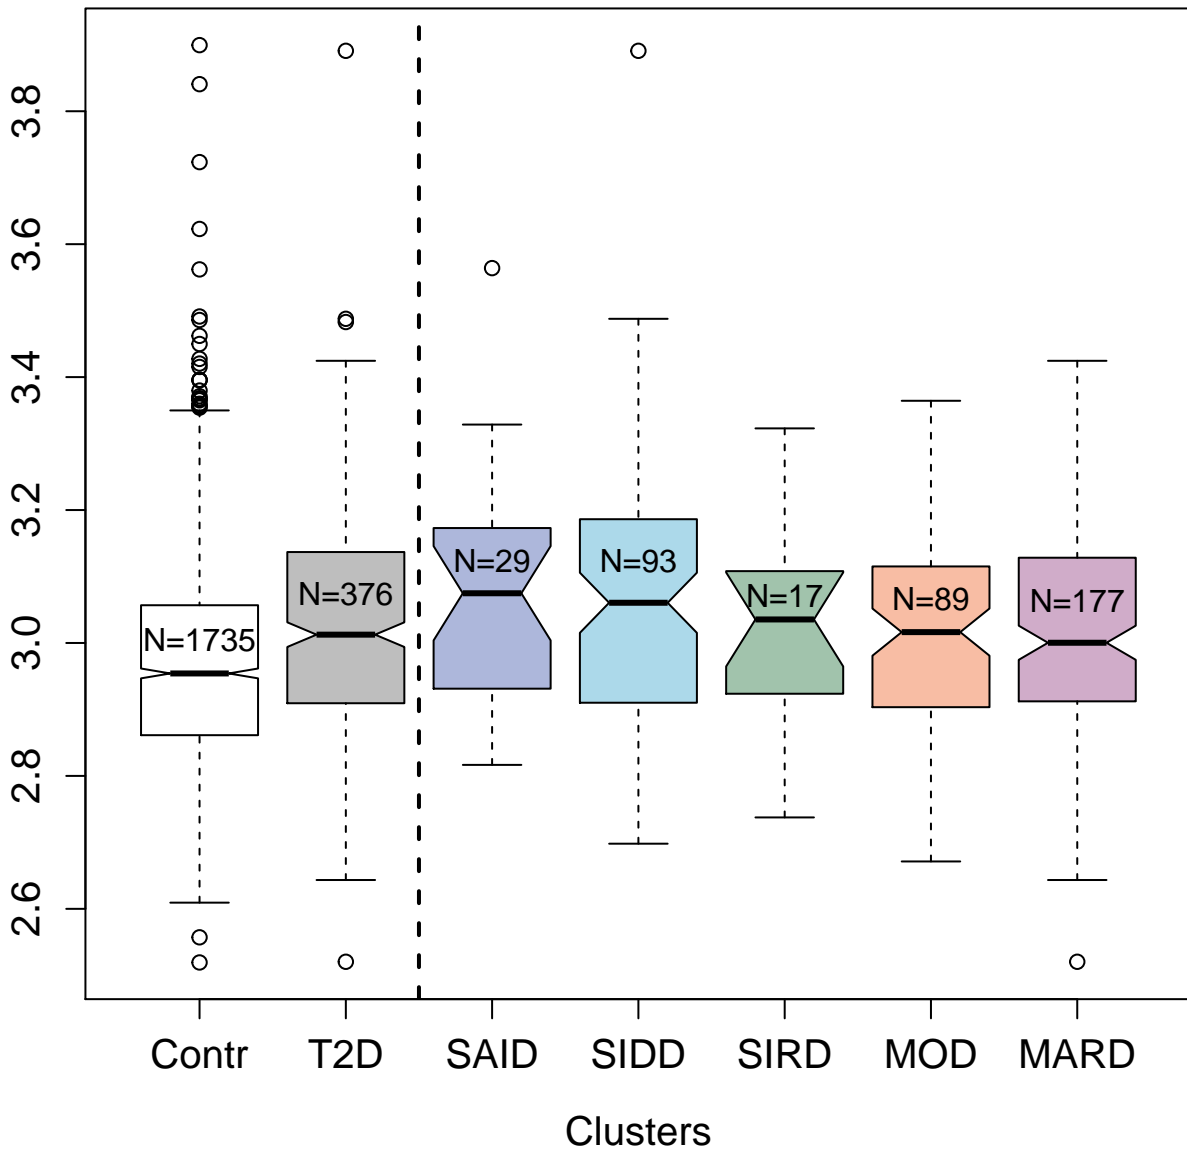

4985-11\_1 : Fatty acid-binding protein; epidermal

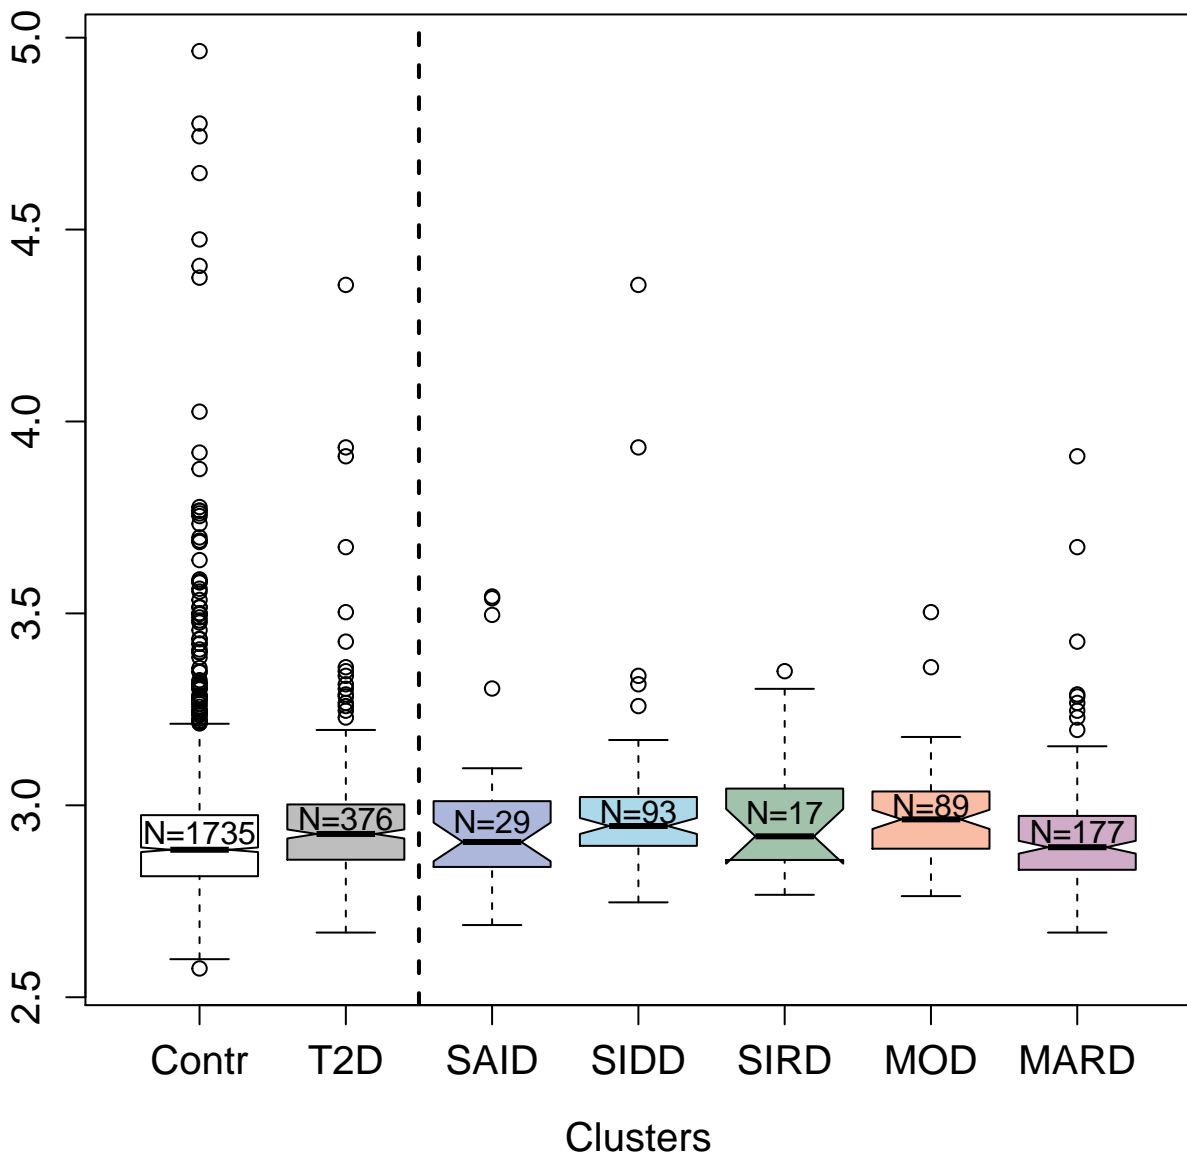



2888-49\_2 : Complement component C7

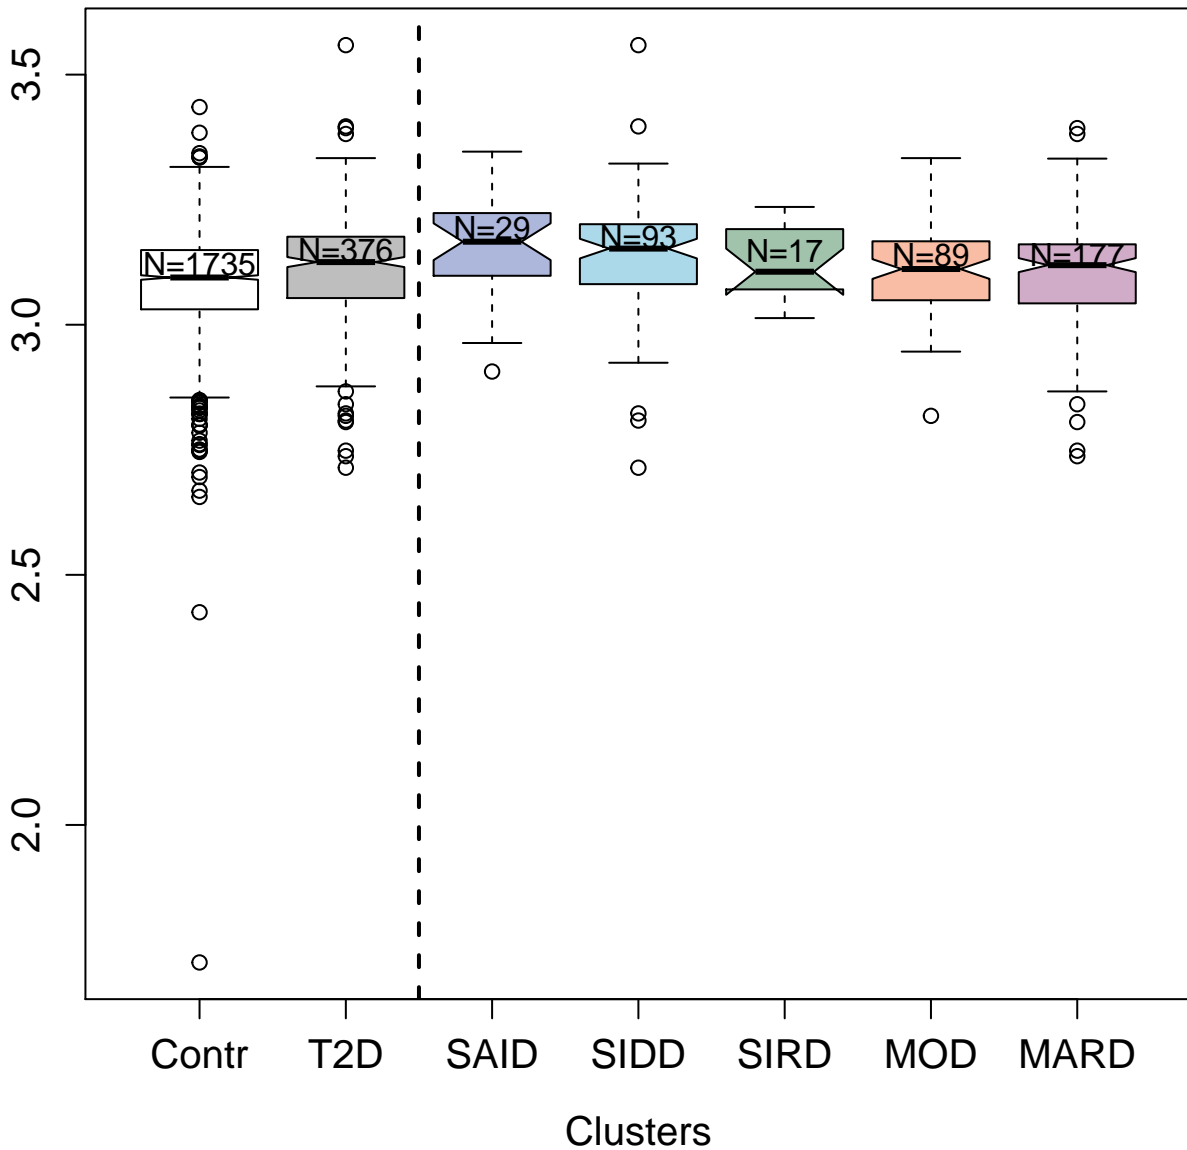

5091-28\_3 : Leukocyte immunoglobulin-like  
receptor subfamily B member 2

3.4 3.6 3.8 4.0 4.2 4.4

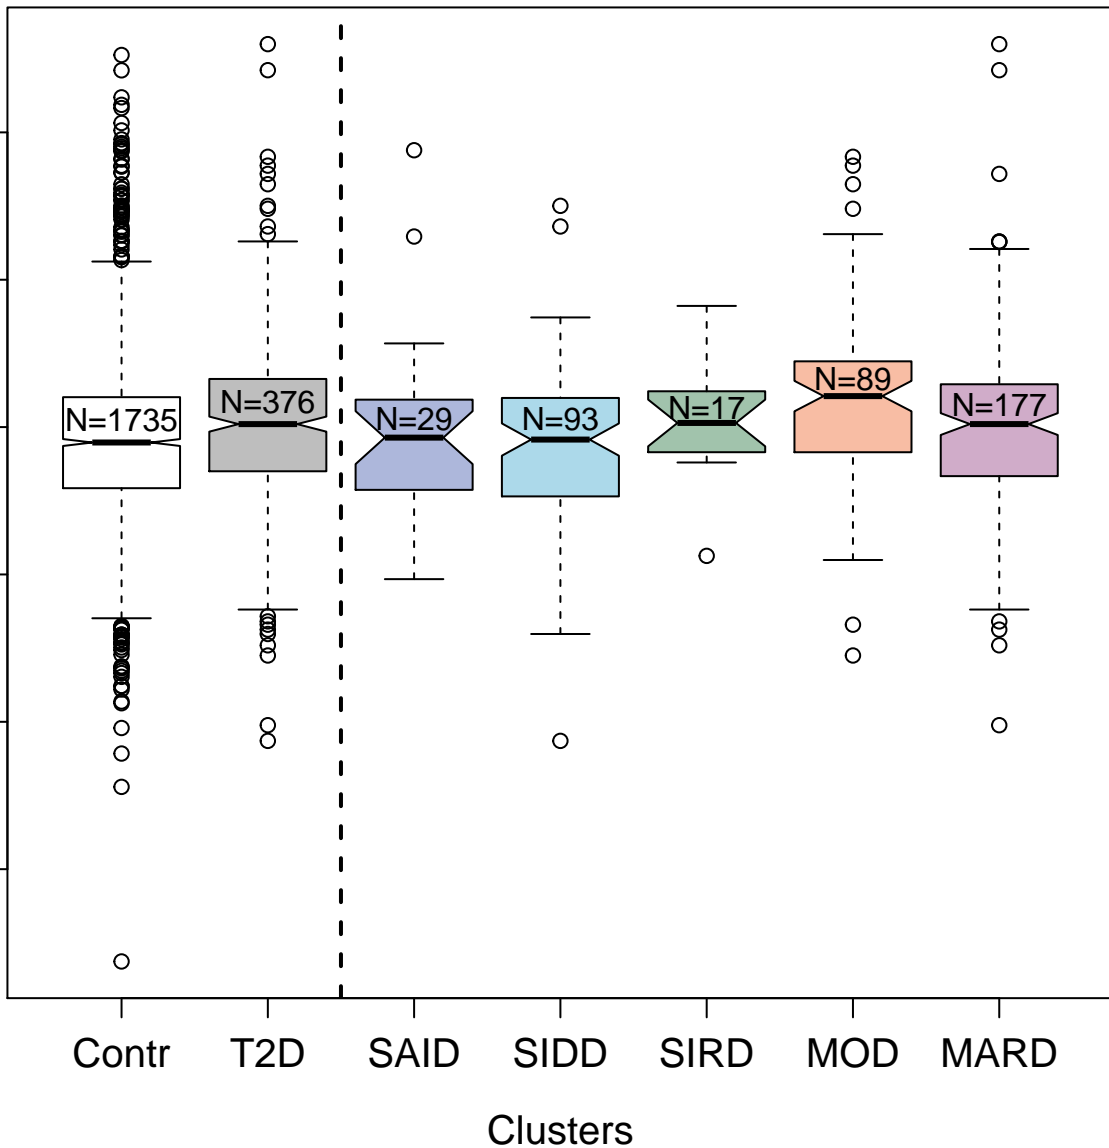

3115-64\_2 : Mitogen-activated protein kinase 1

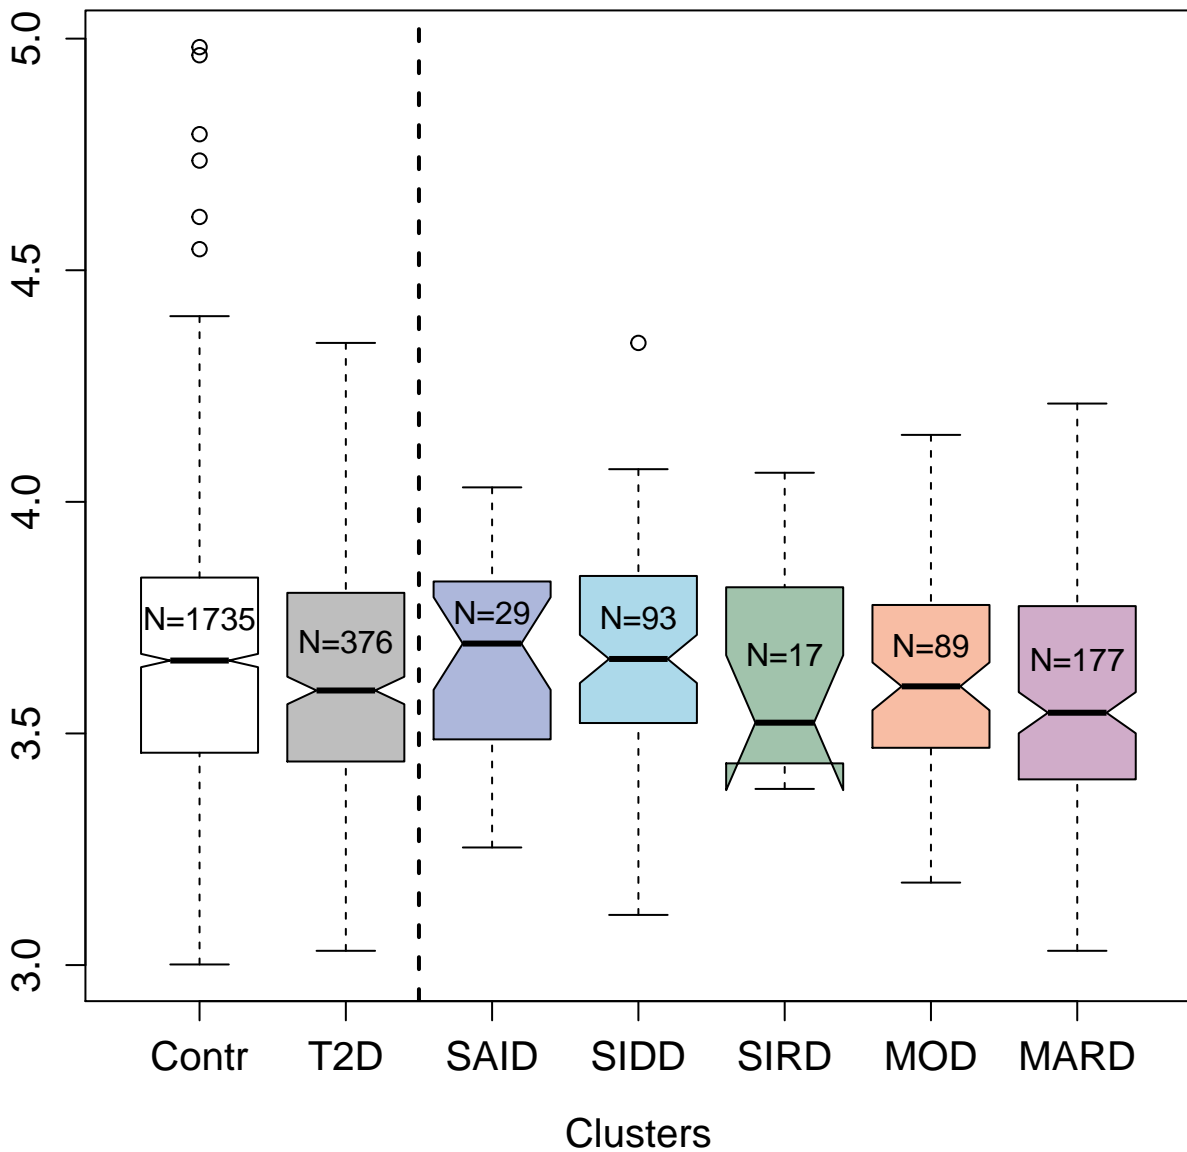

3434-34\_1 : Fibronectin Fragment 3

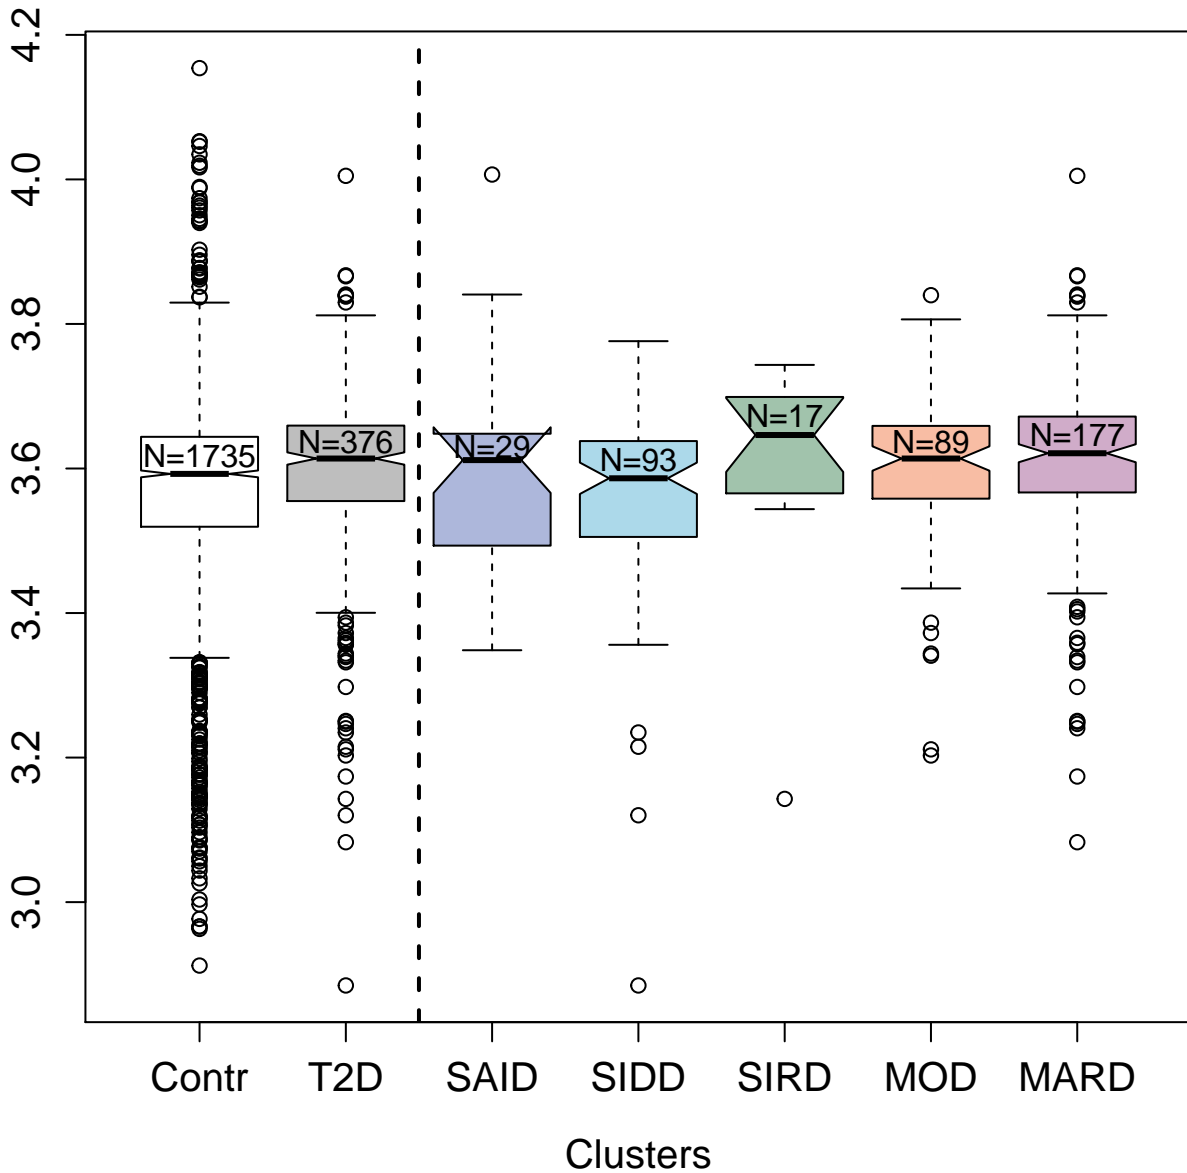

4246-40\_2 : Neural cell adhesion molecule L1

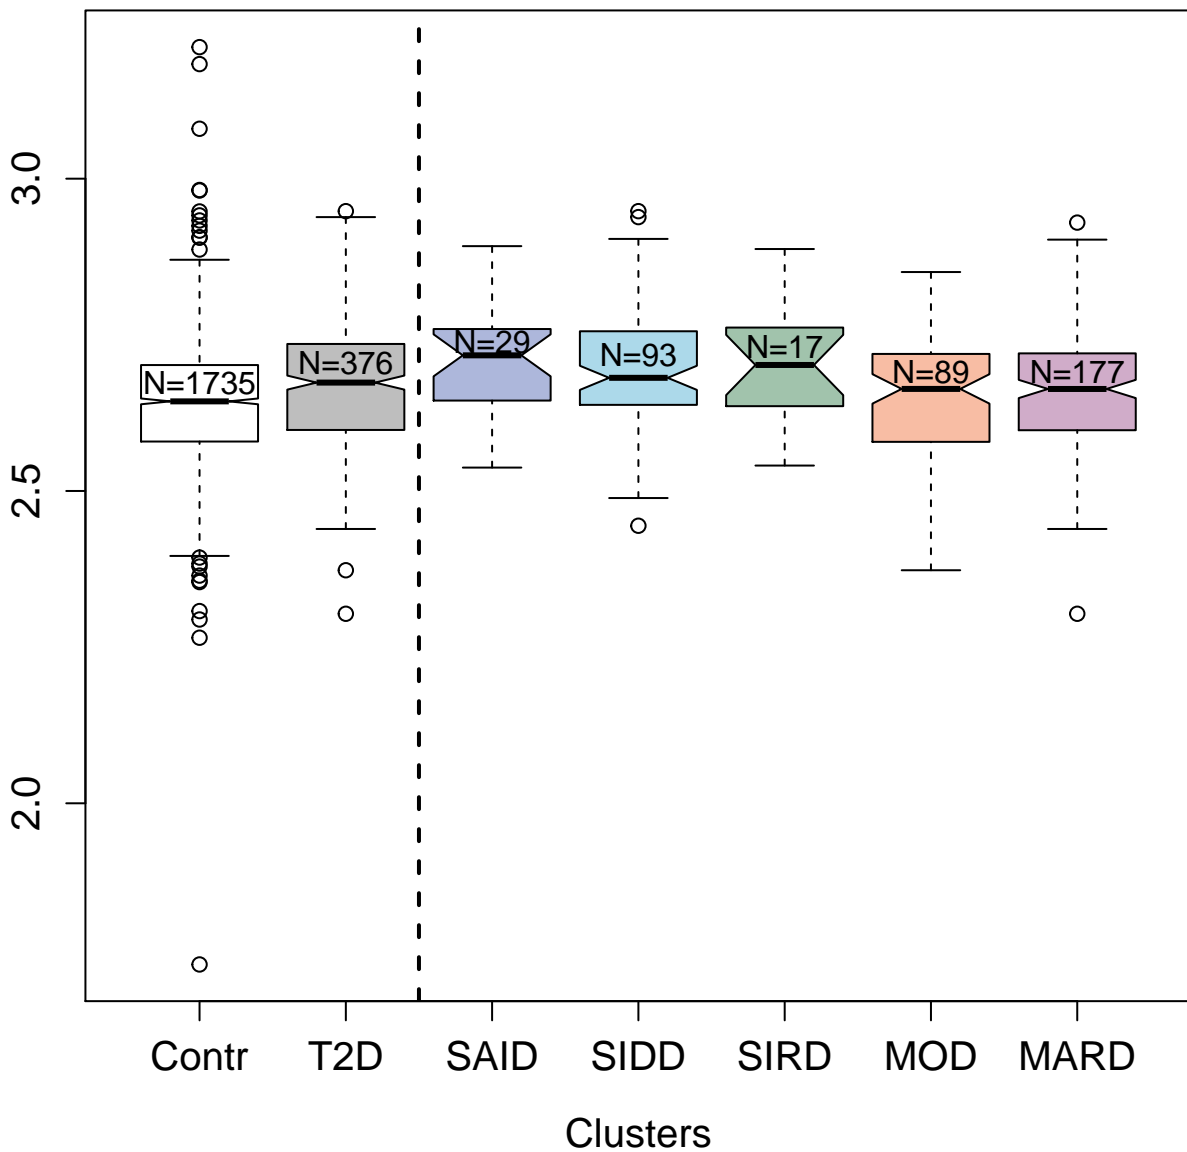

3893-64\_1 : Mesothelin

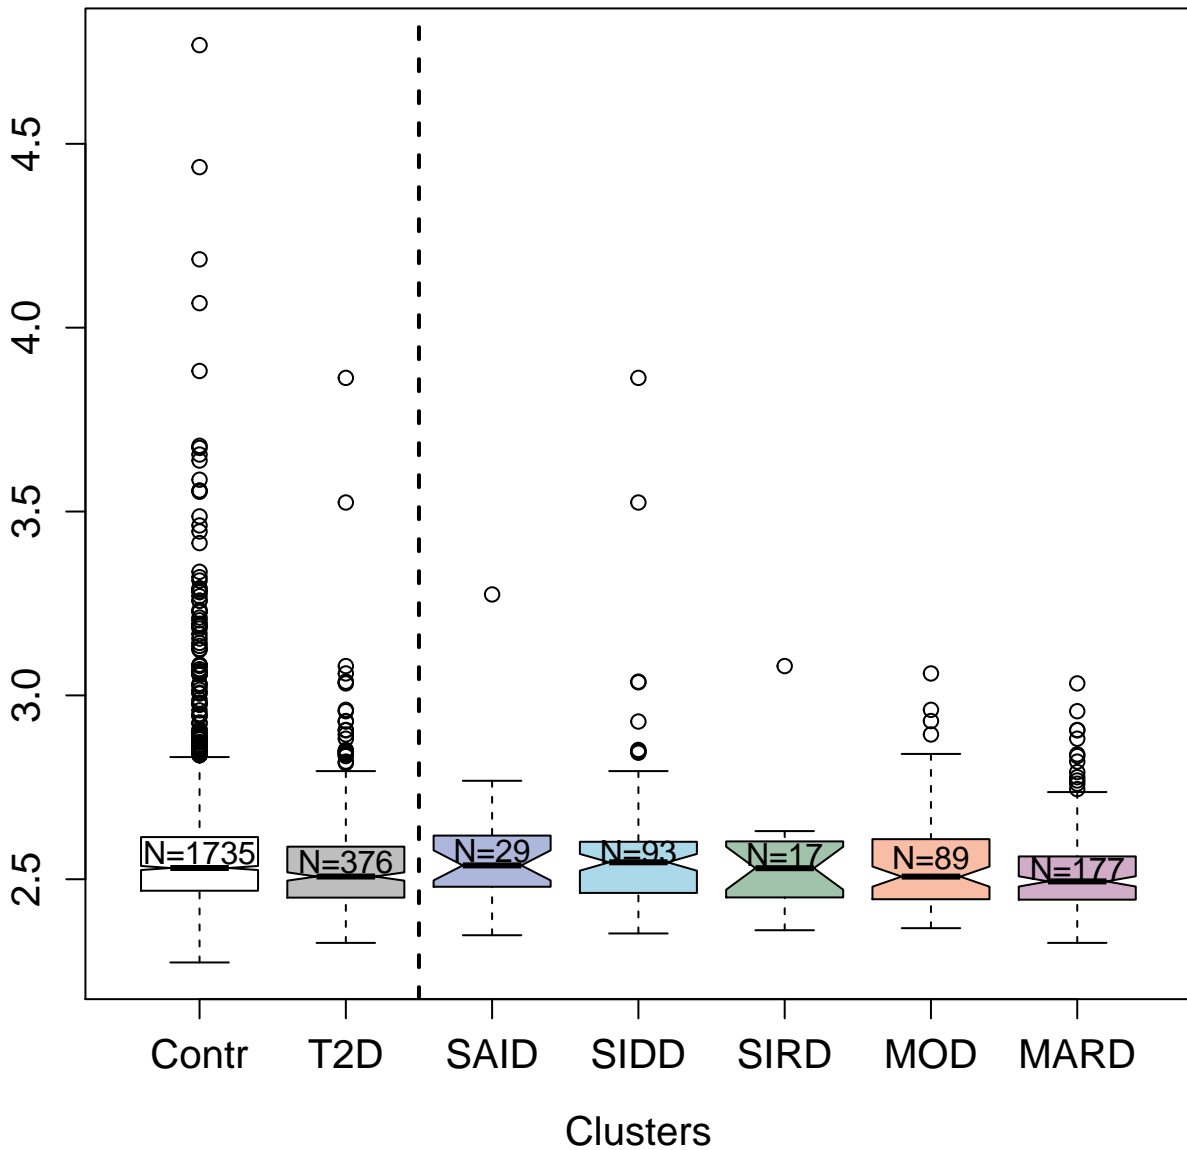

2774-10\_3 : Interleukin-16

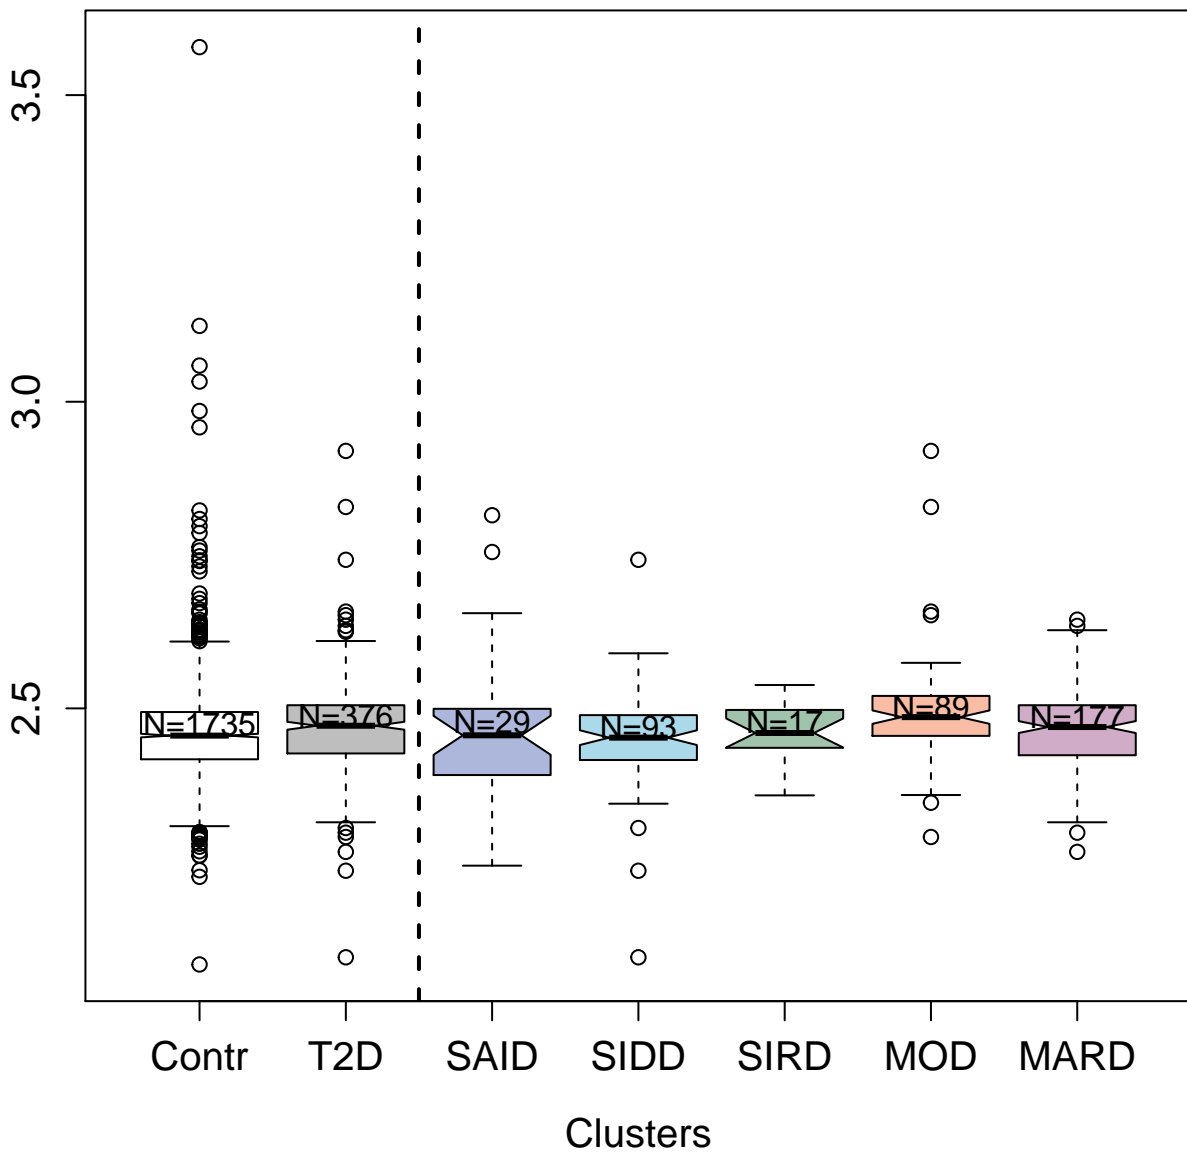

5087-5\_3 : Interleukin-22 receptor subunit  
alpha-2

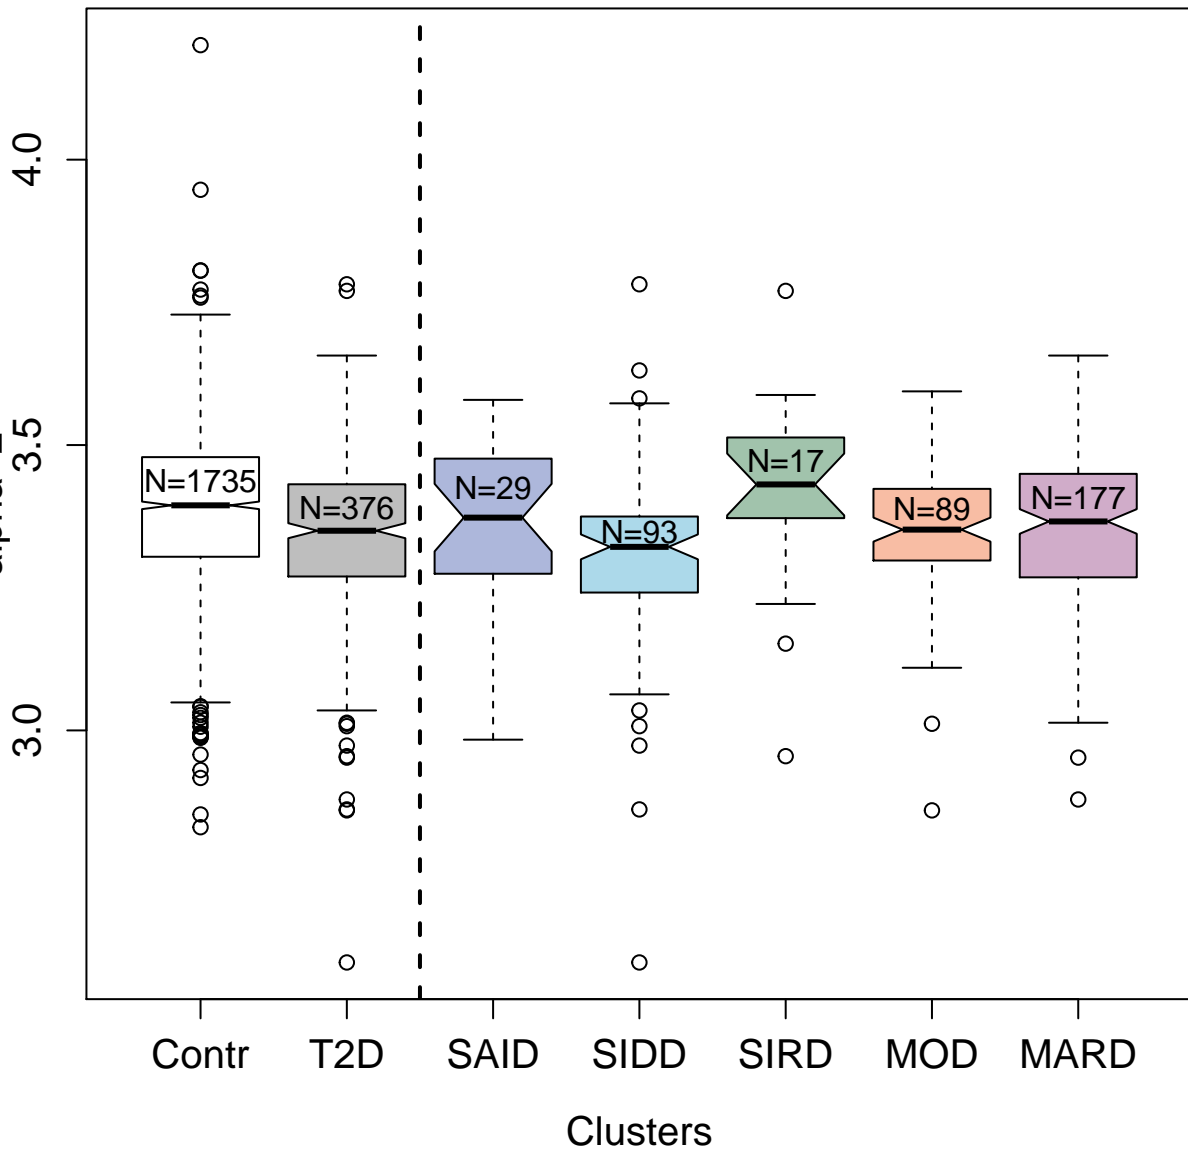



2631-50\_2 : Interleukin-10 receptor subunit beta

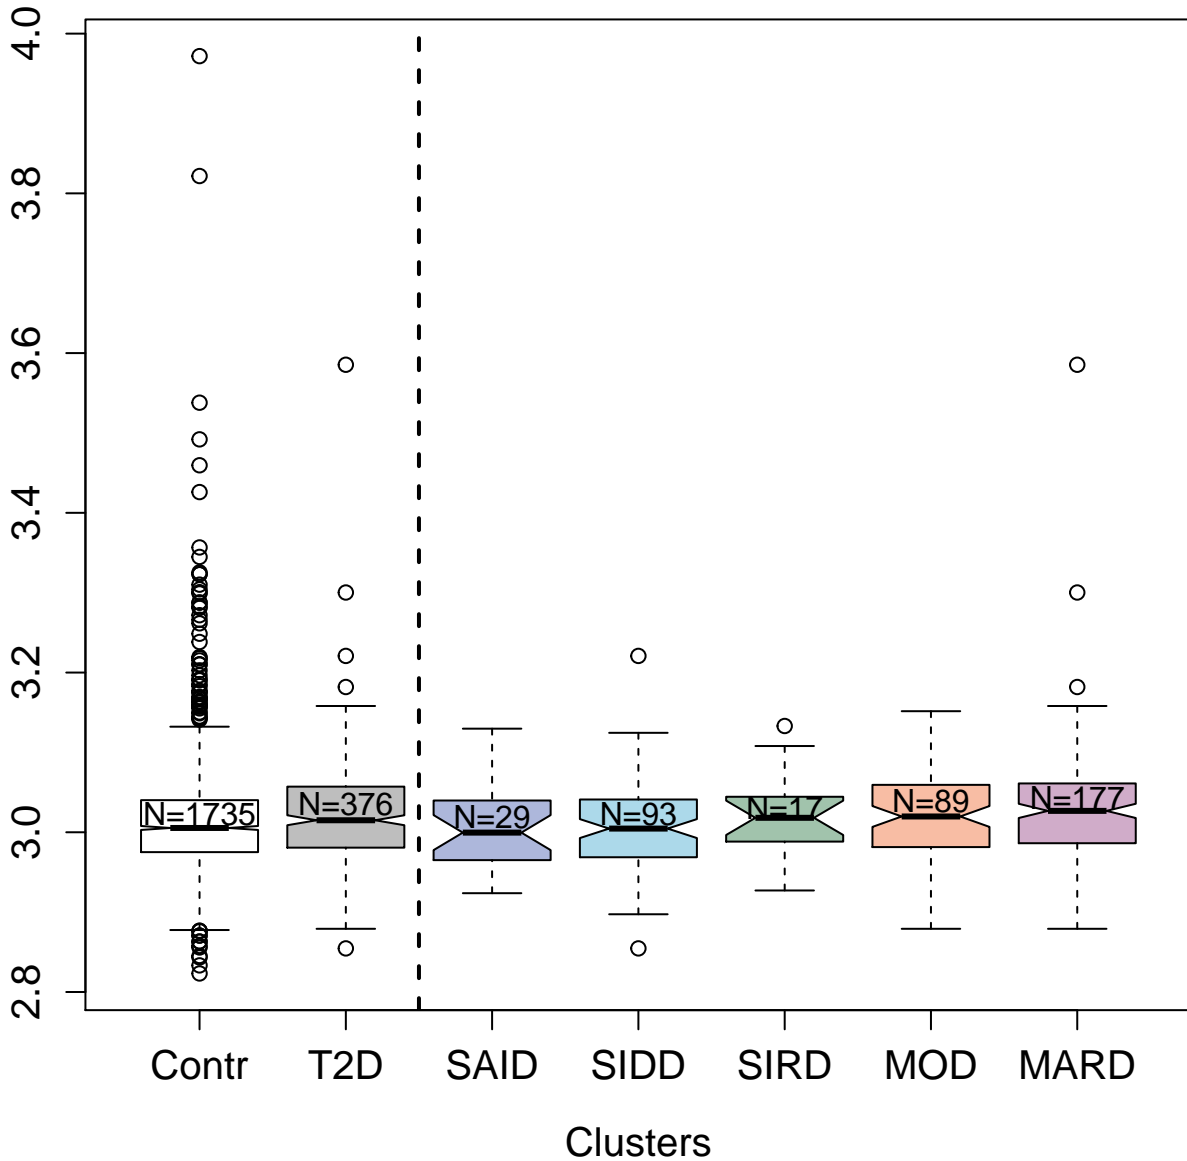

2944-66\_2 : Neuroblastoma suppressor of tumorigenicity 1

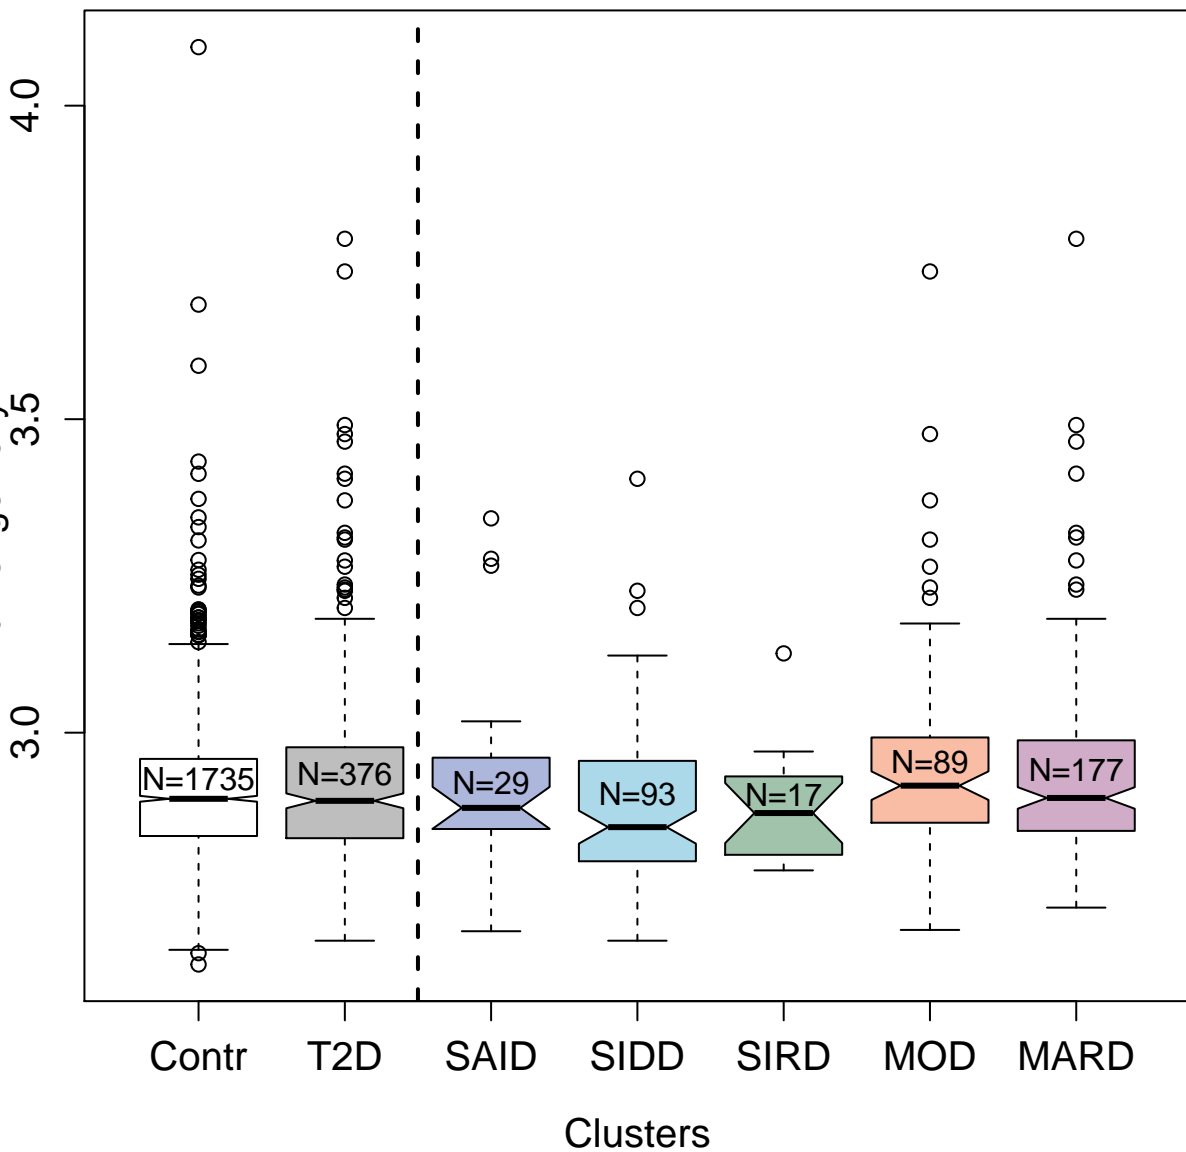

2848-2\_2 : Wnt inhibitory factor 1

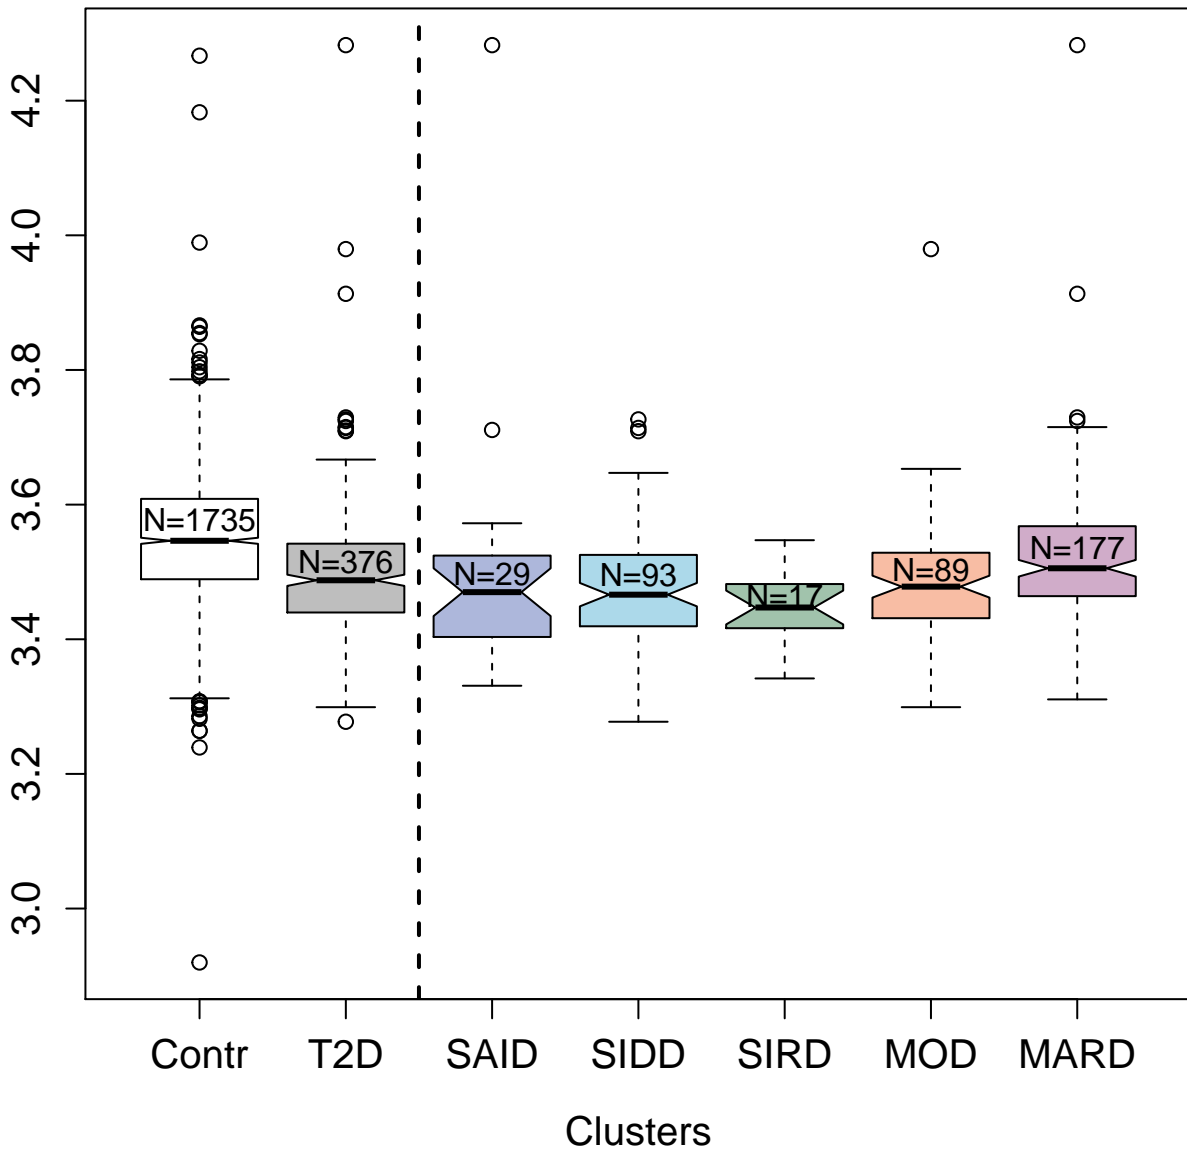

3827-22\_1 : Serine/threonine-protein kinase PAK 6

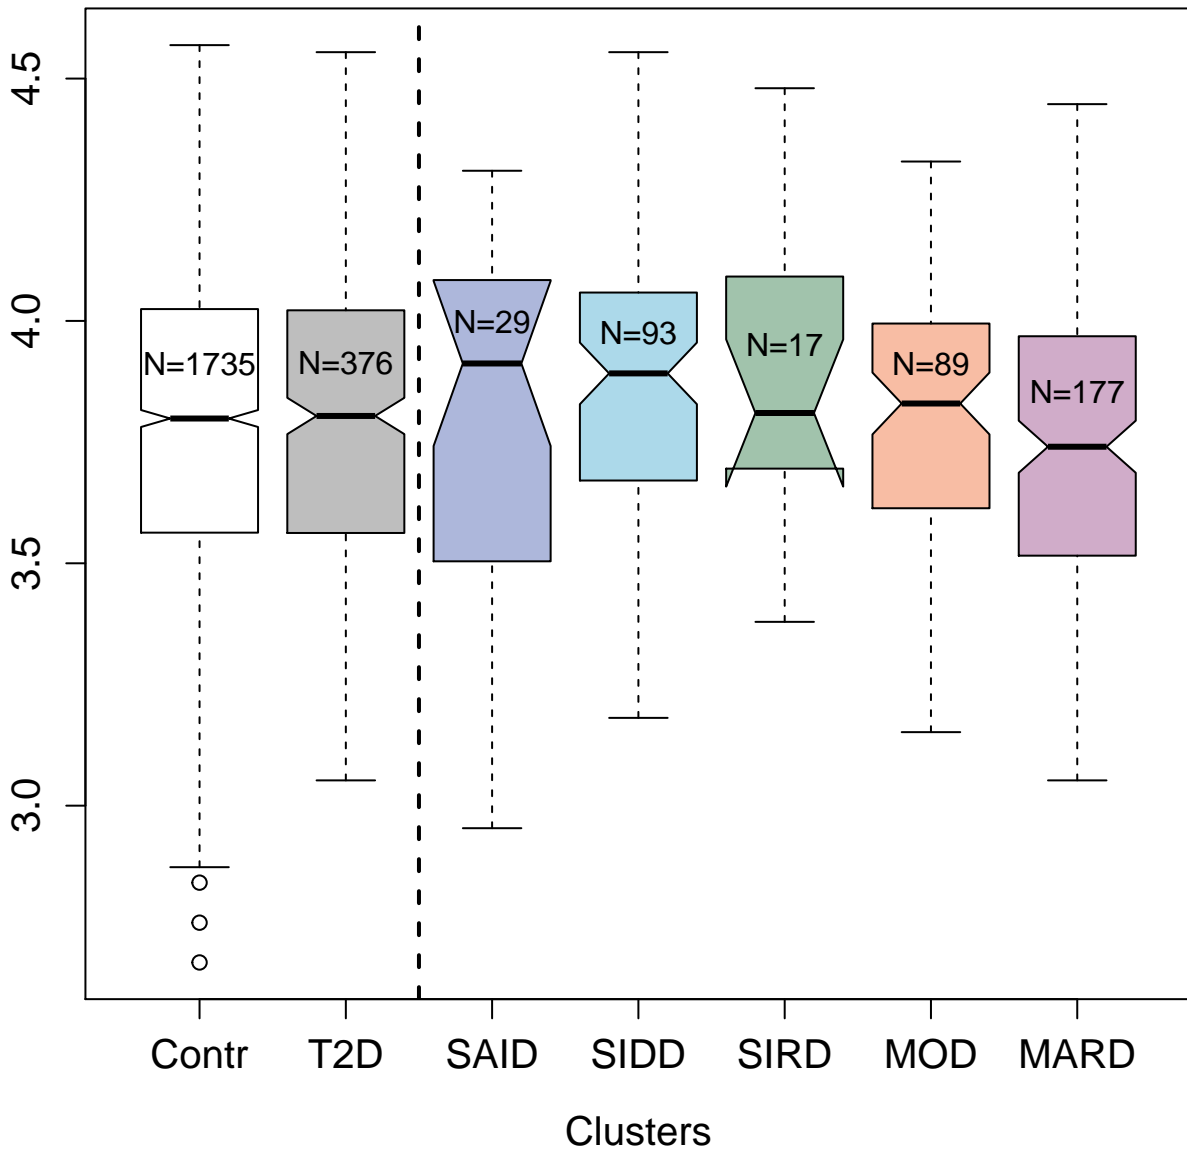



3077-66\_2 : Coagulation factor Xa

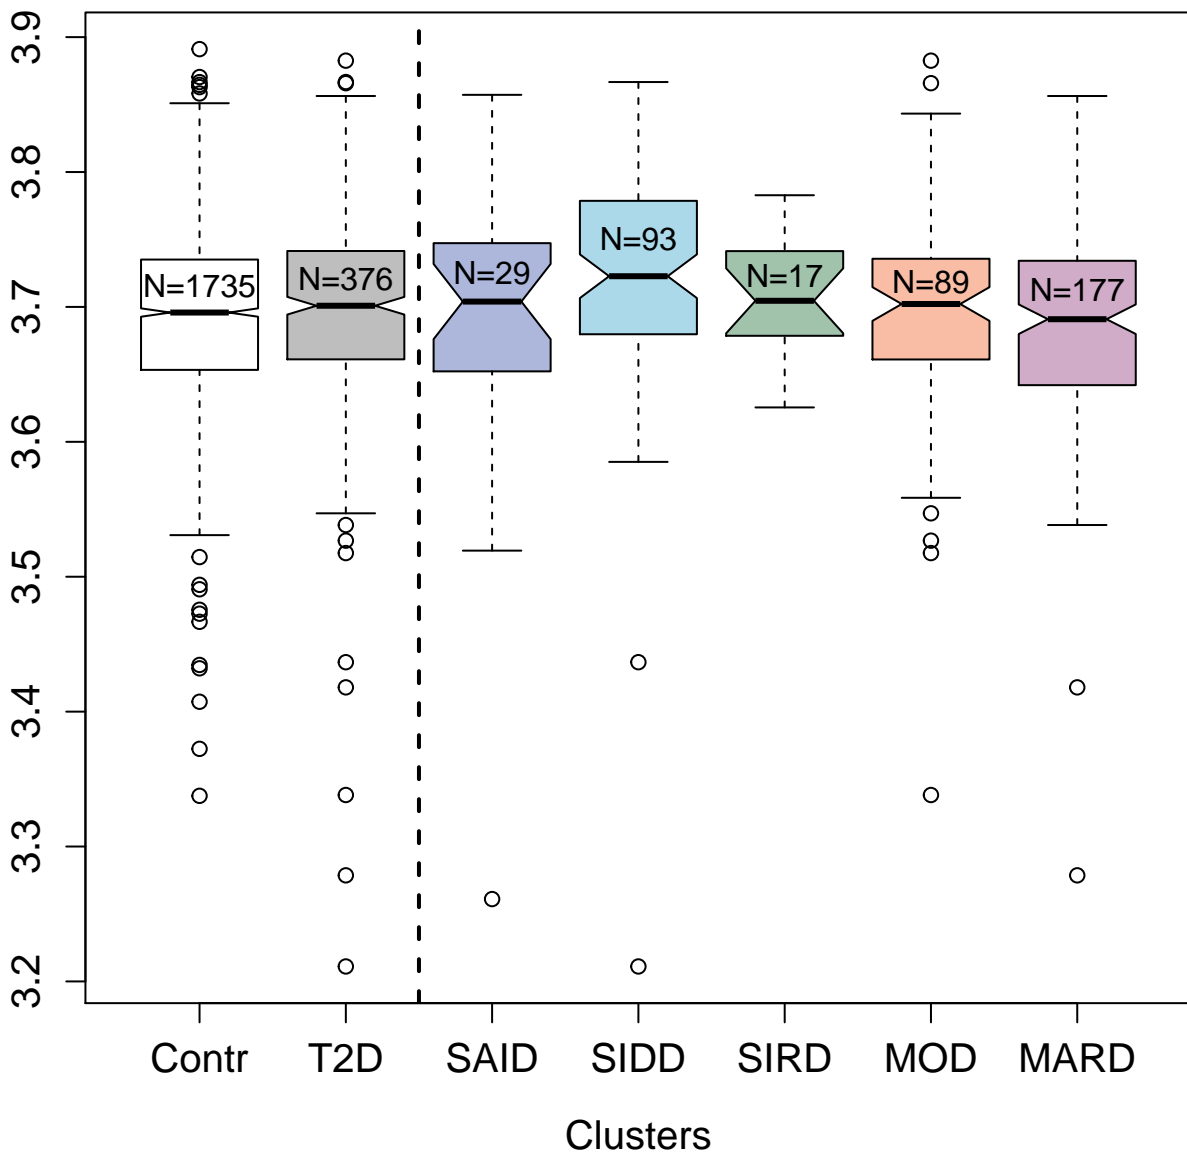

3191-50\_2 : WAP; kazal; immunoglobulin; kunitz  
and NTR domain-containing protein 1

2.5 3.0 3.5

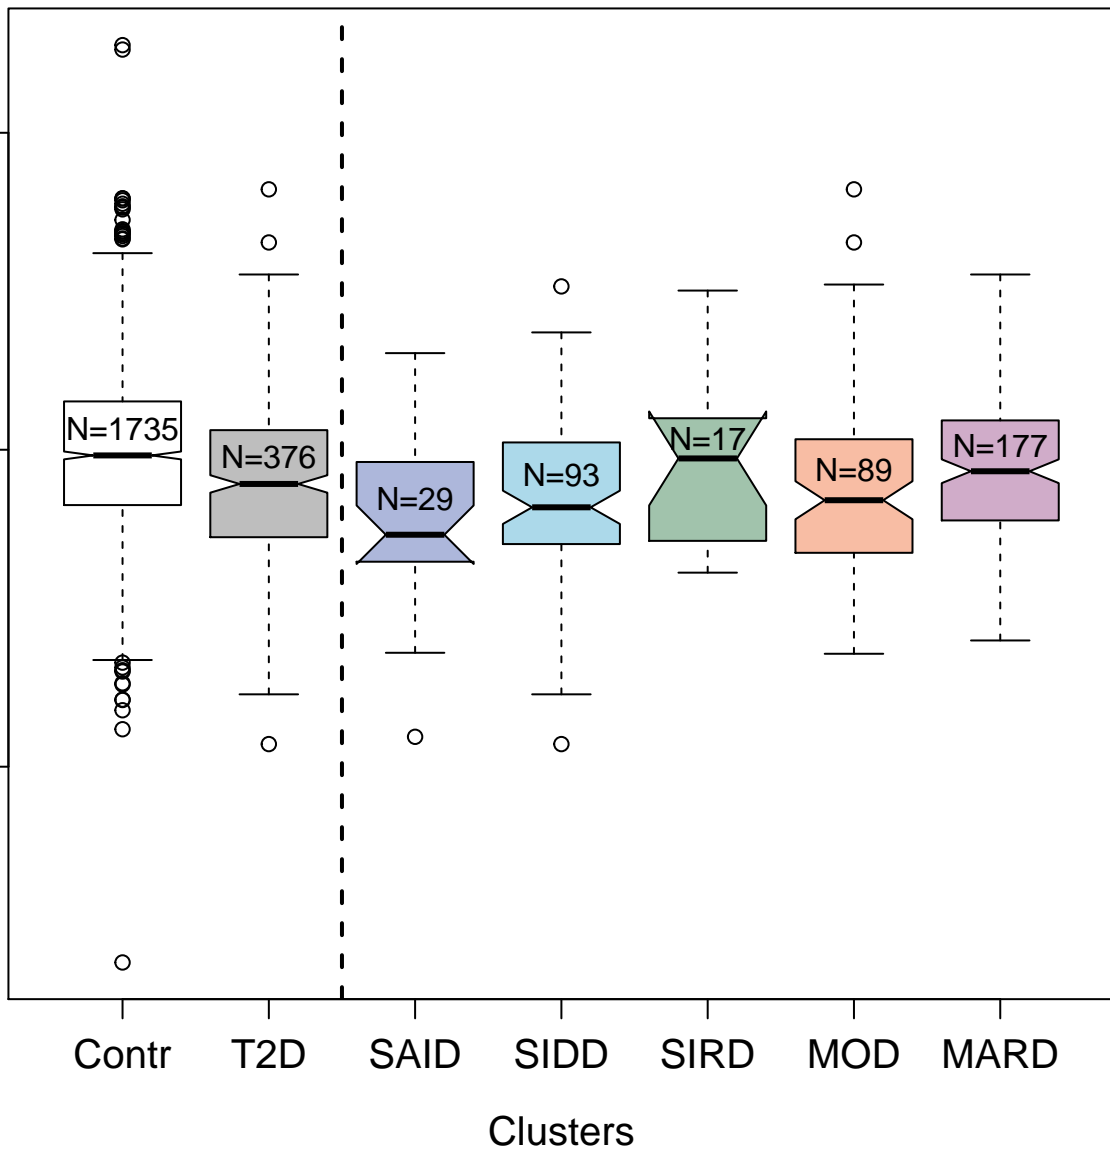

13094-75\_3 : R-spondin-3

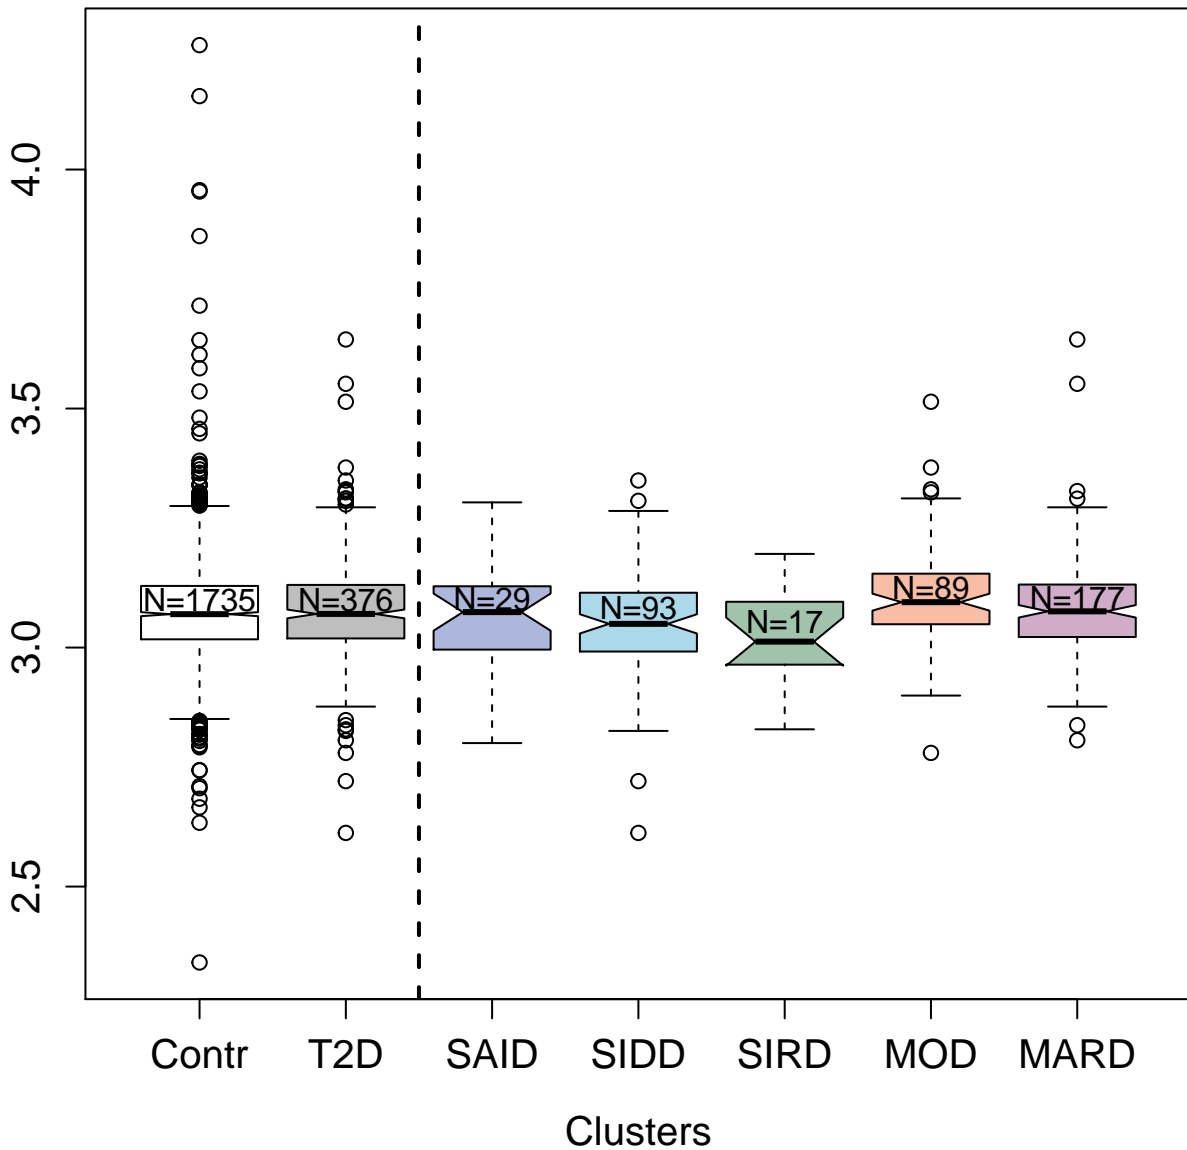



3366-51\_2 : Extracellular matrix protein 1

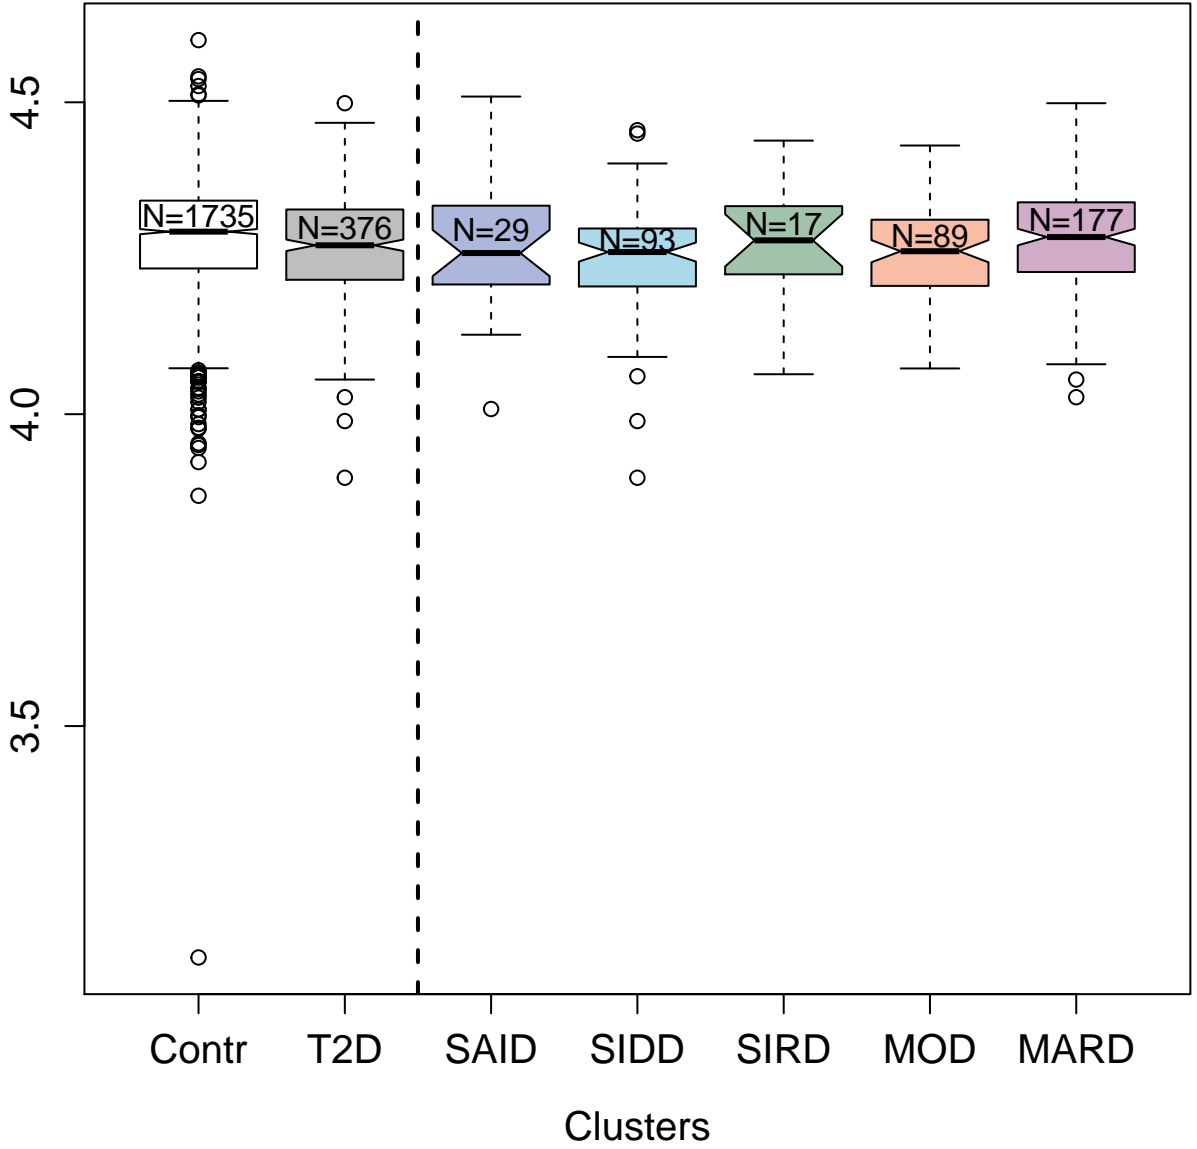

10364-6\_3 : Mothers against decapentaplegic

homolog 2

4.5

4.0

3.5

Contr

T2D

SAID

SIDD

SIRD

MOD

MARD

Clusters

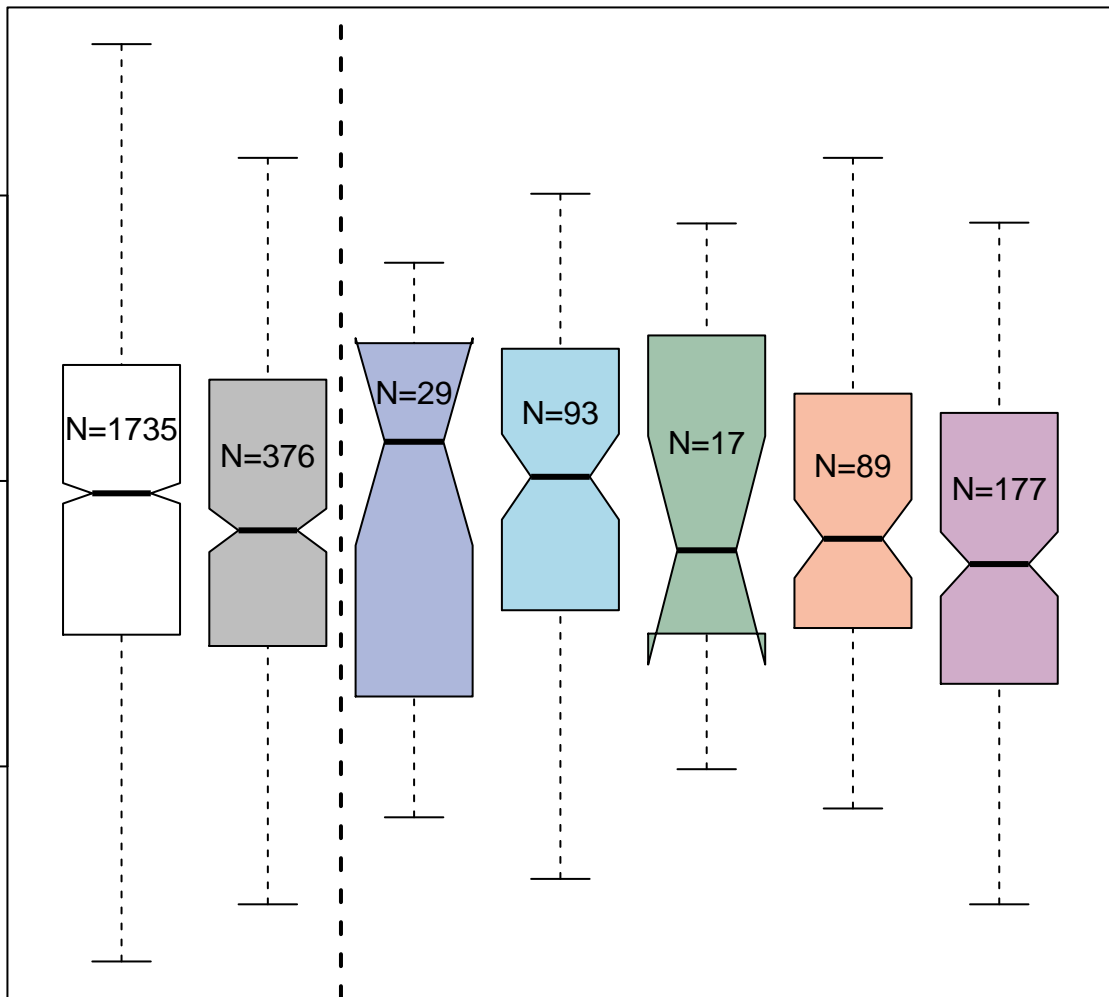

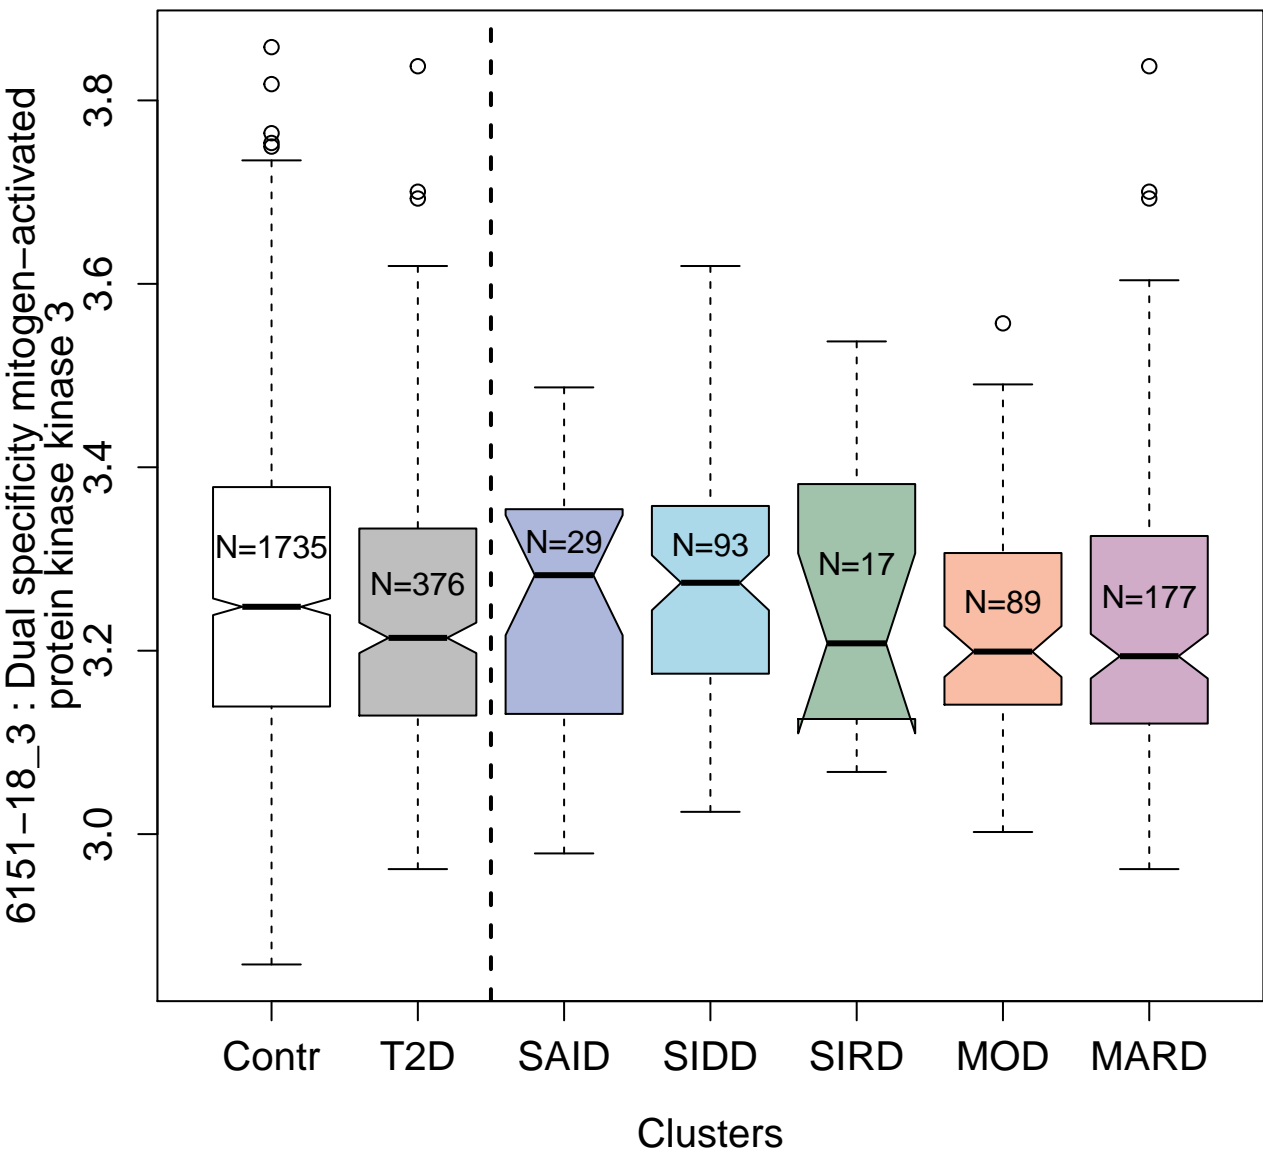

5443-62\_2 : Atrial natriuretic factor

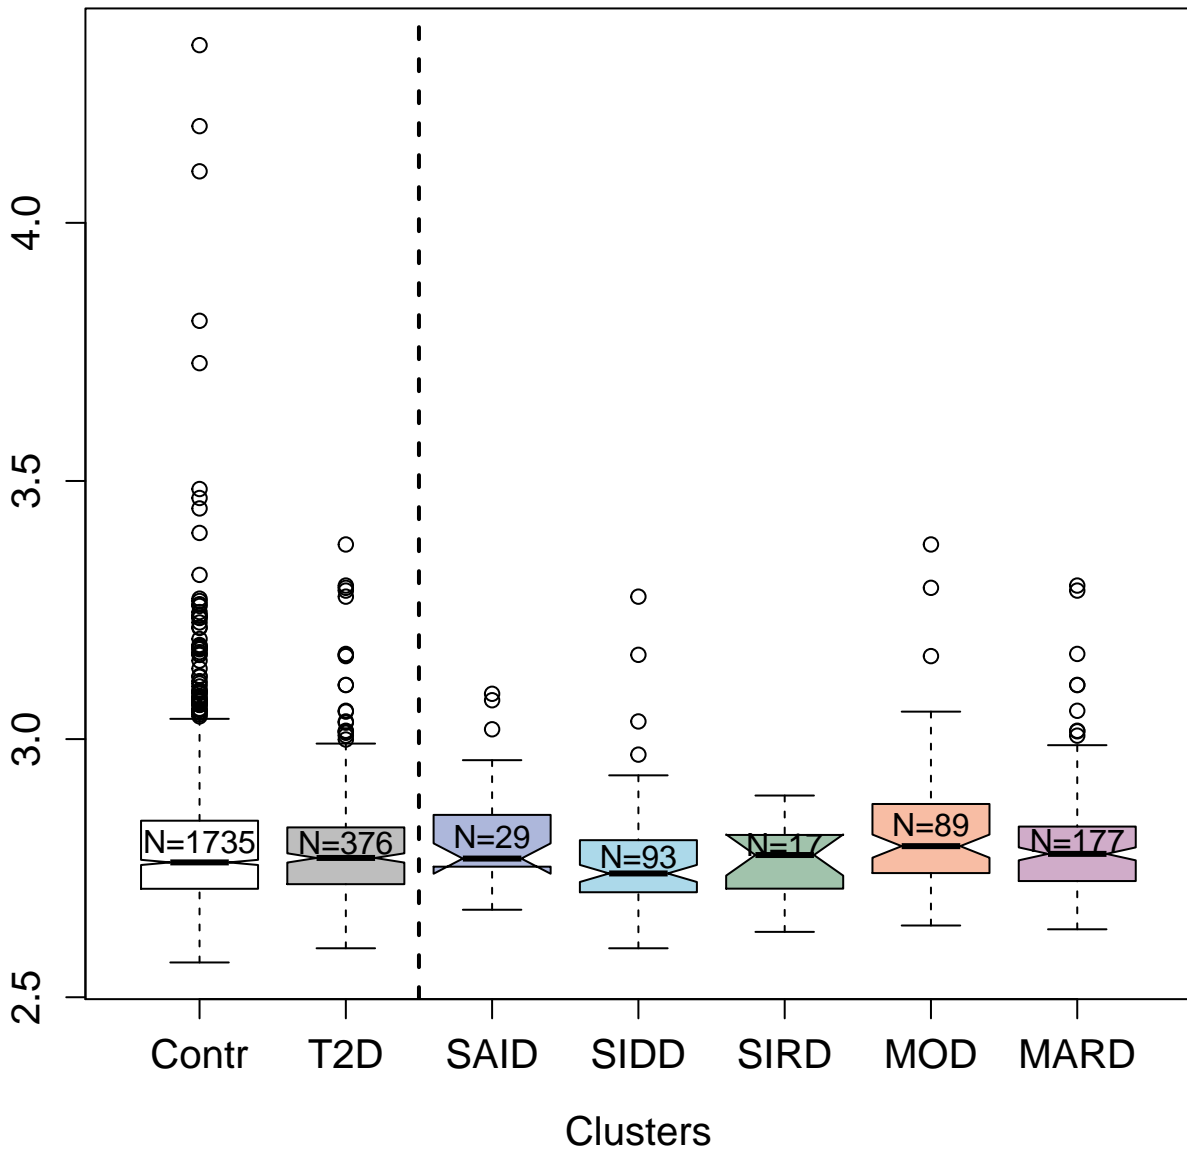

8467-9\_3 : Inhibin beta A chain:Inhibin beta B

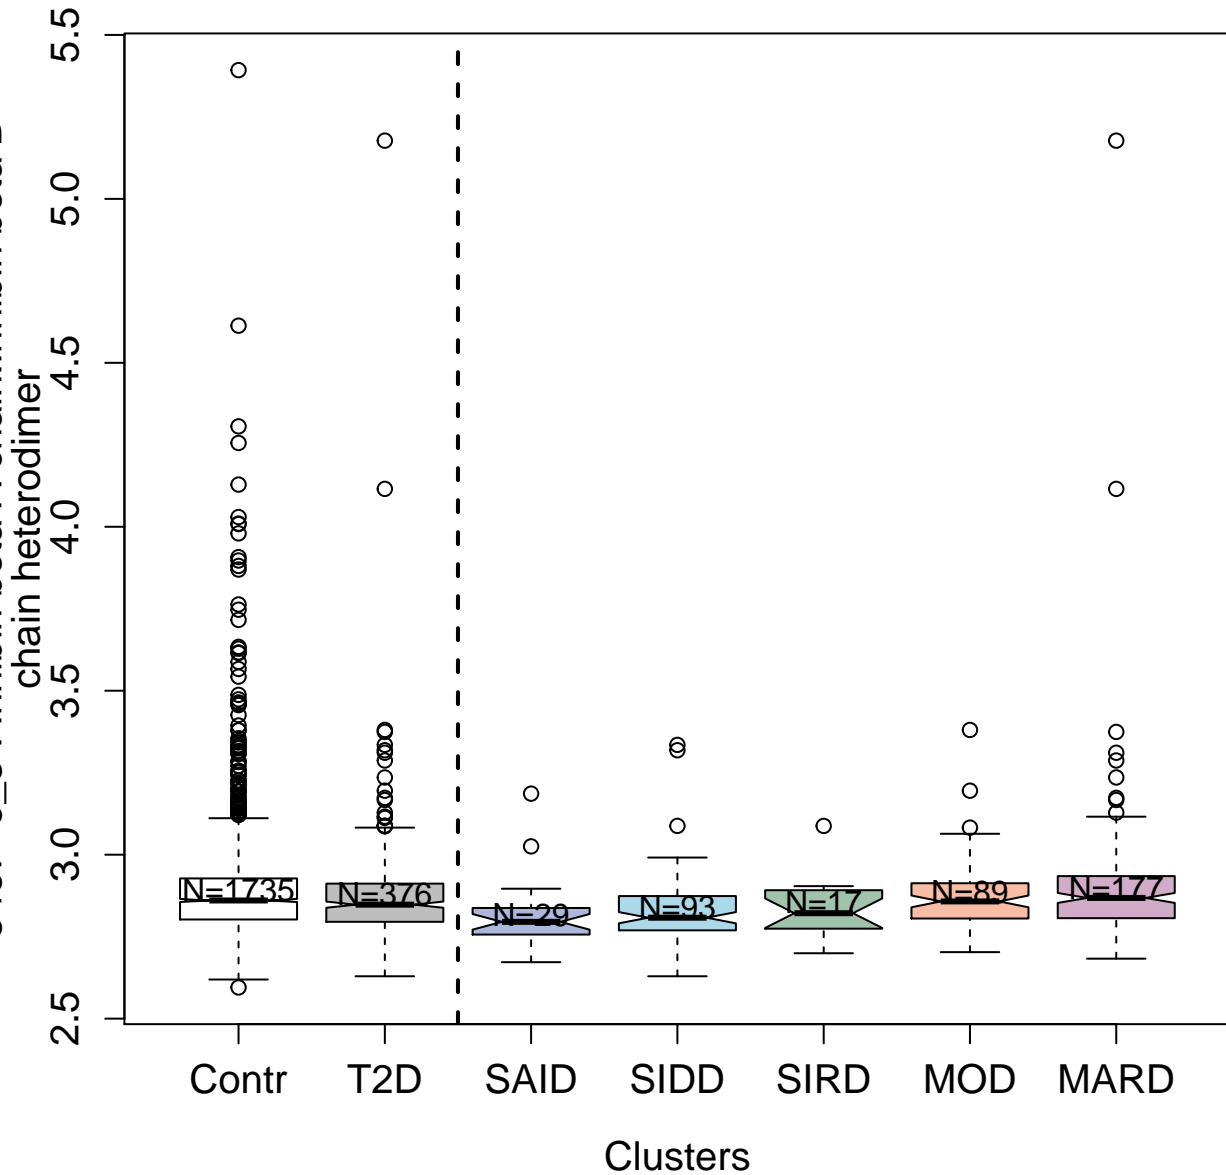

4866-59\_2 : BDNF/NT-3 growth factors receptor

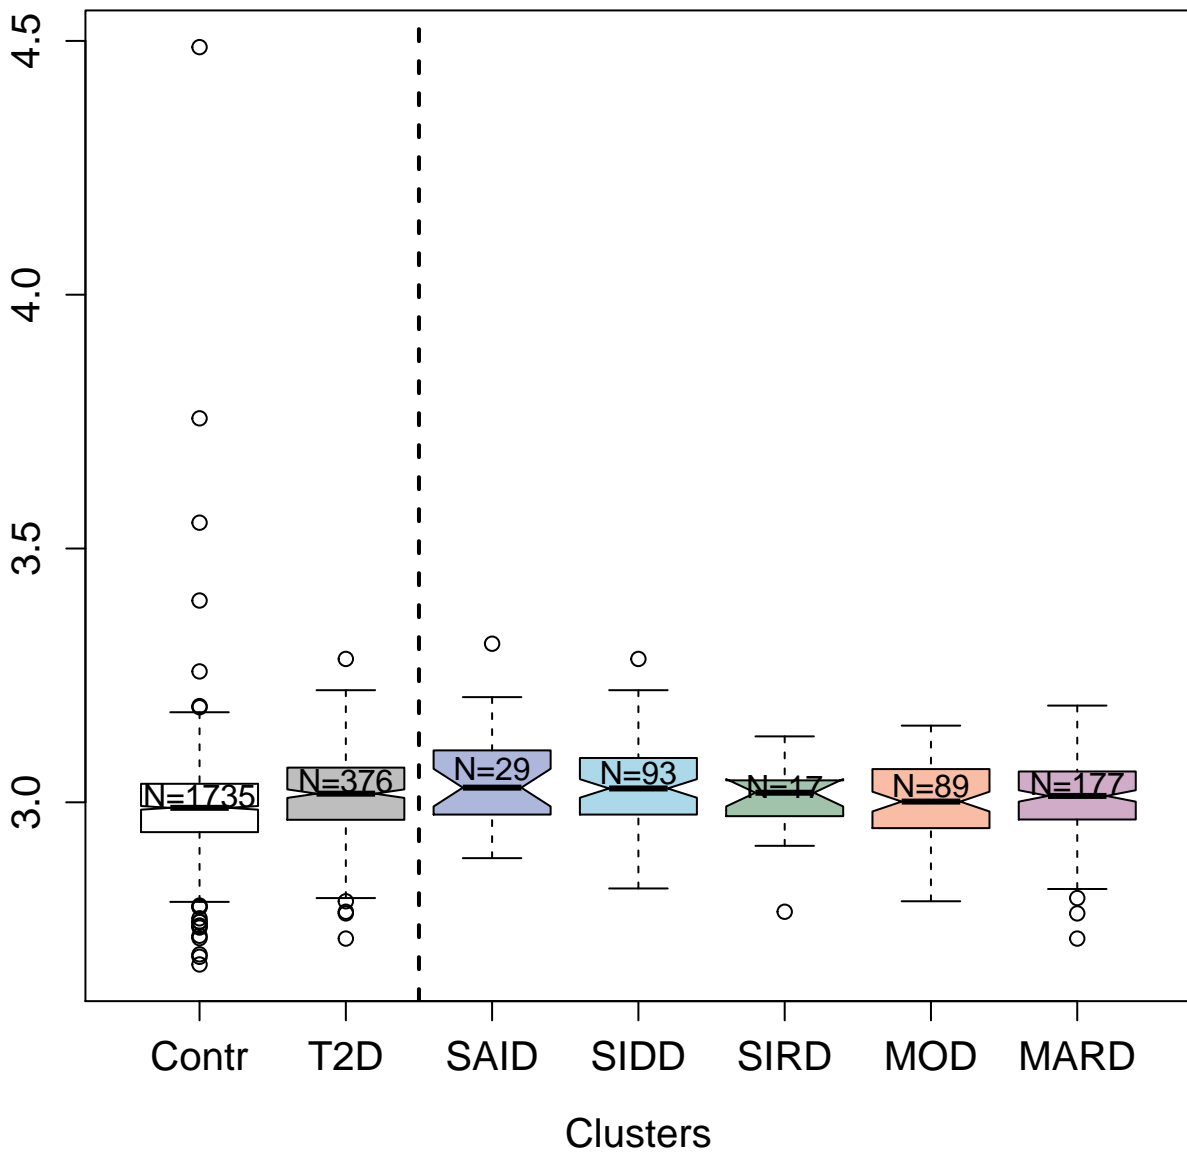

2685-21\_2 : Insulin-like growth factor-binding

protein 5

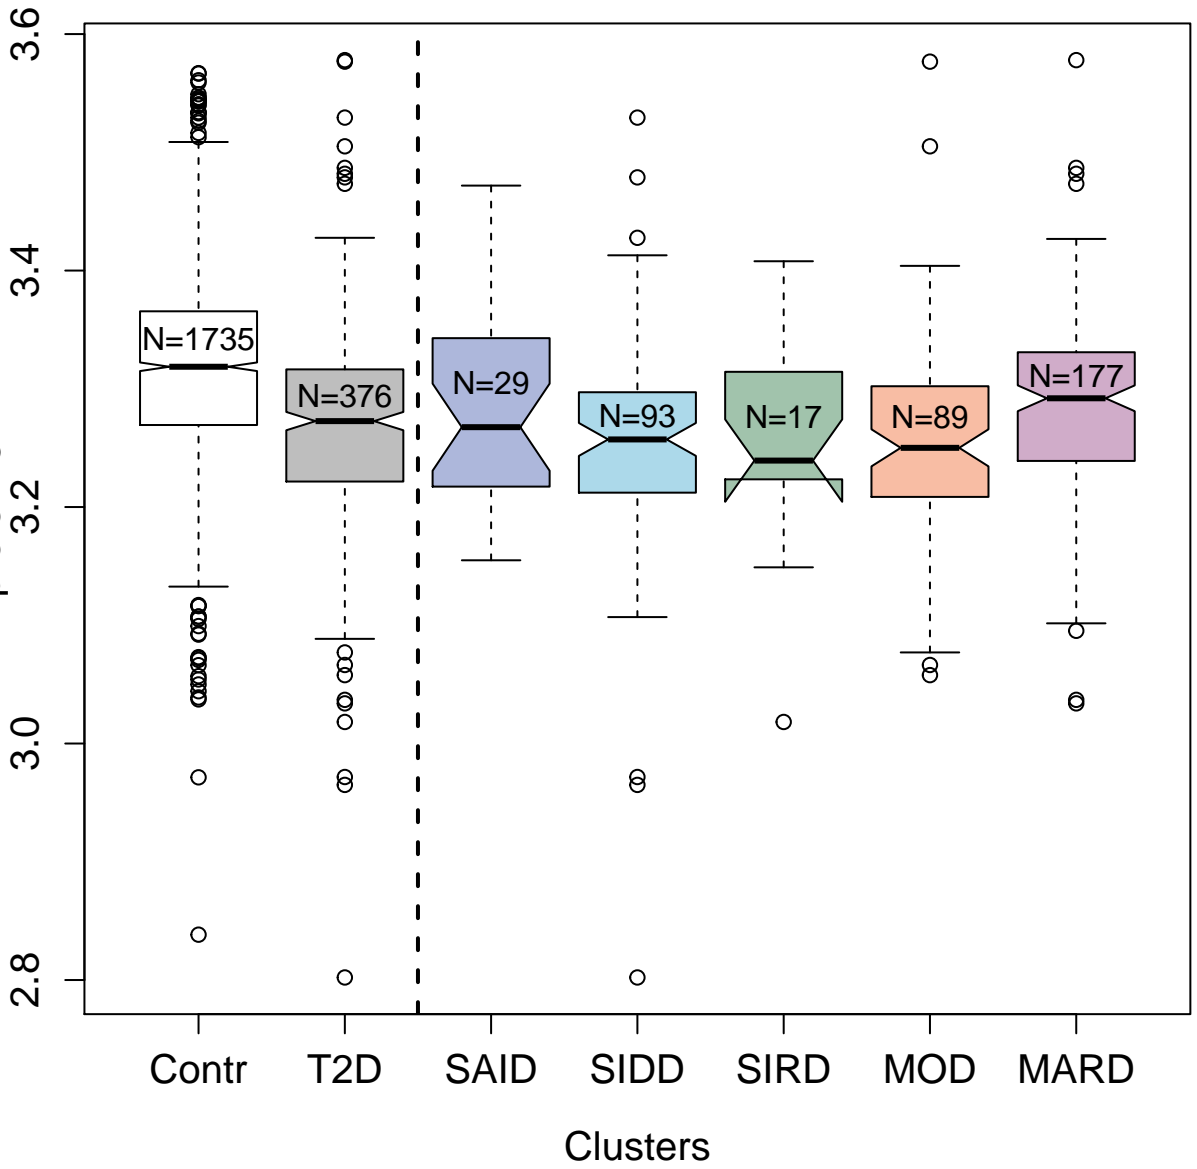

2643-57\_2 : Cadherin-3

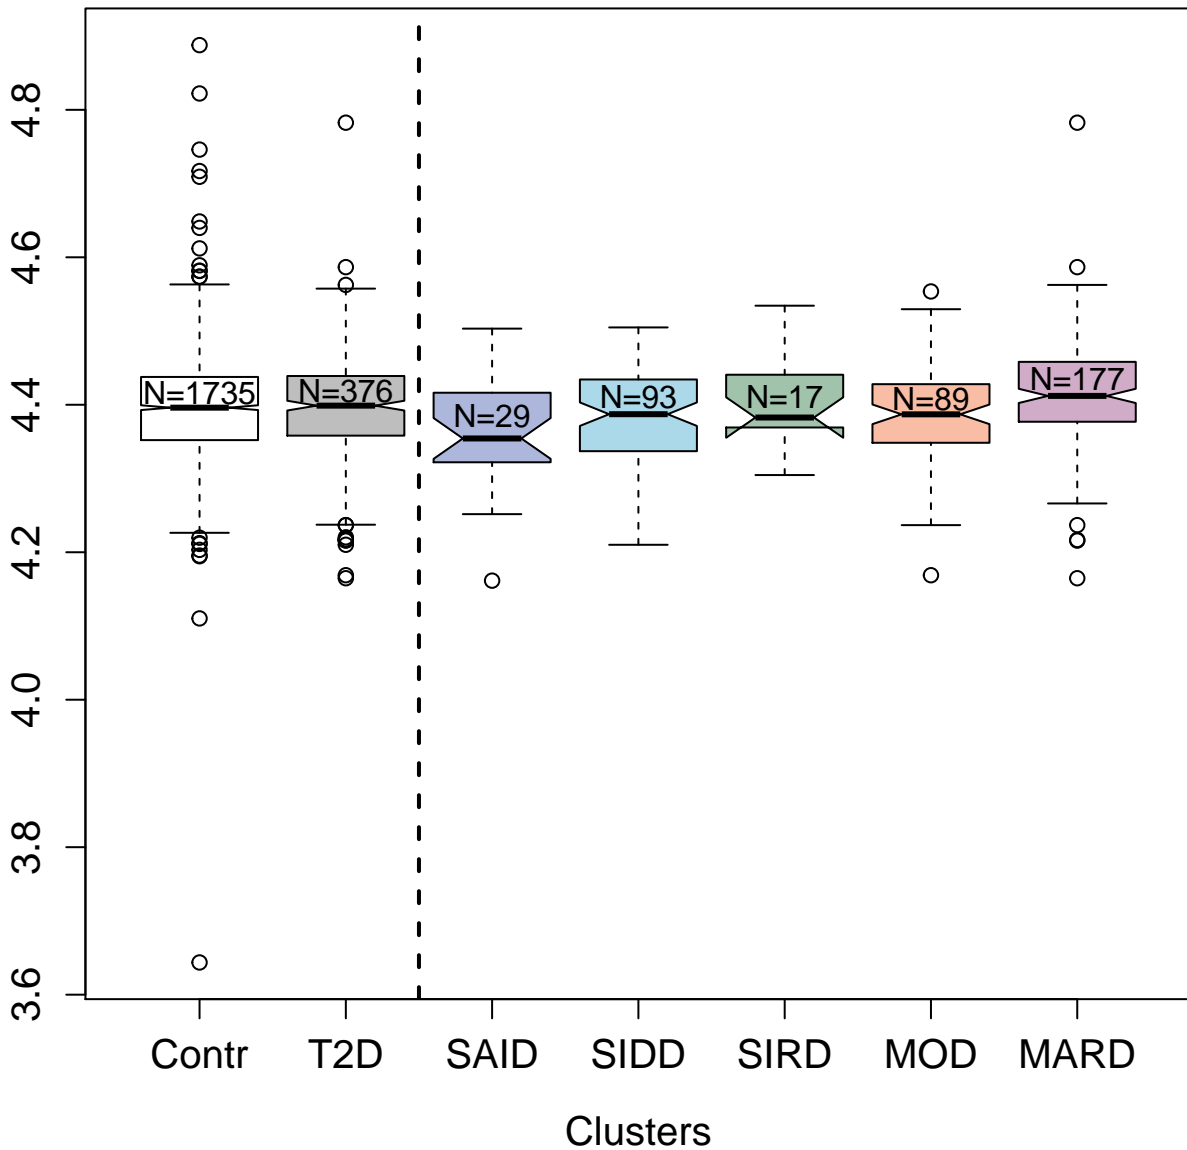



4546-27\_3 : Adhesion G protein-coupled receptor  
E2

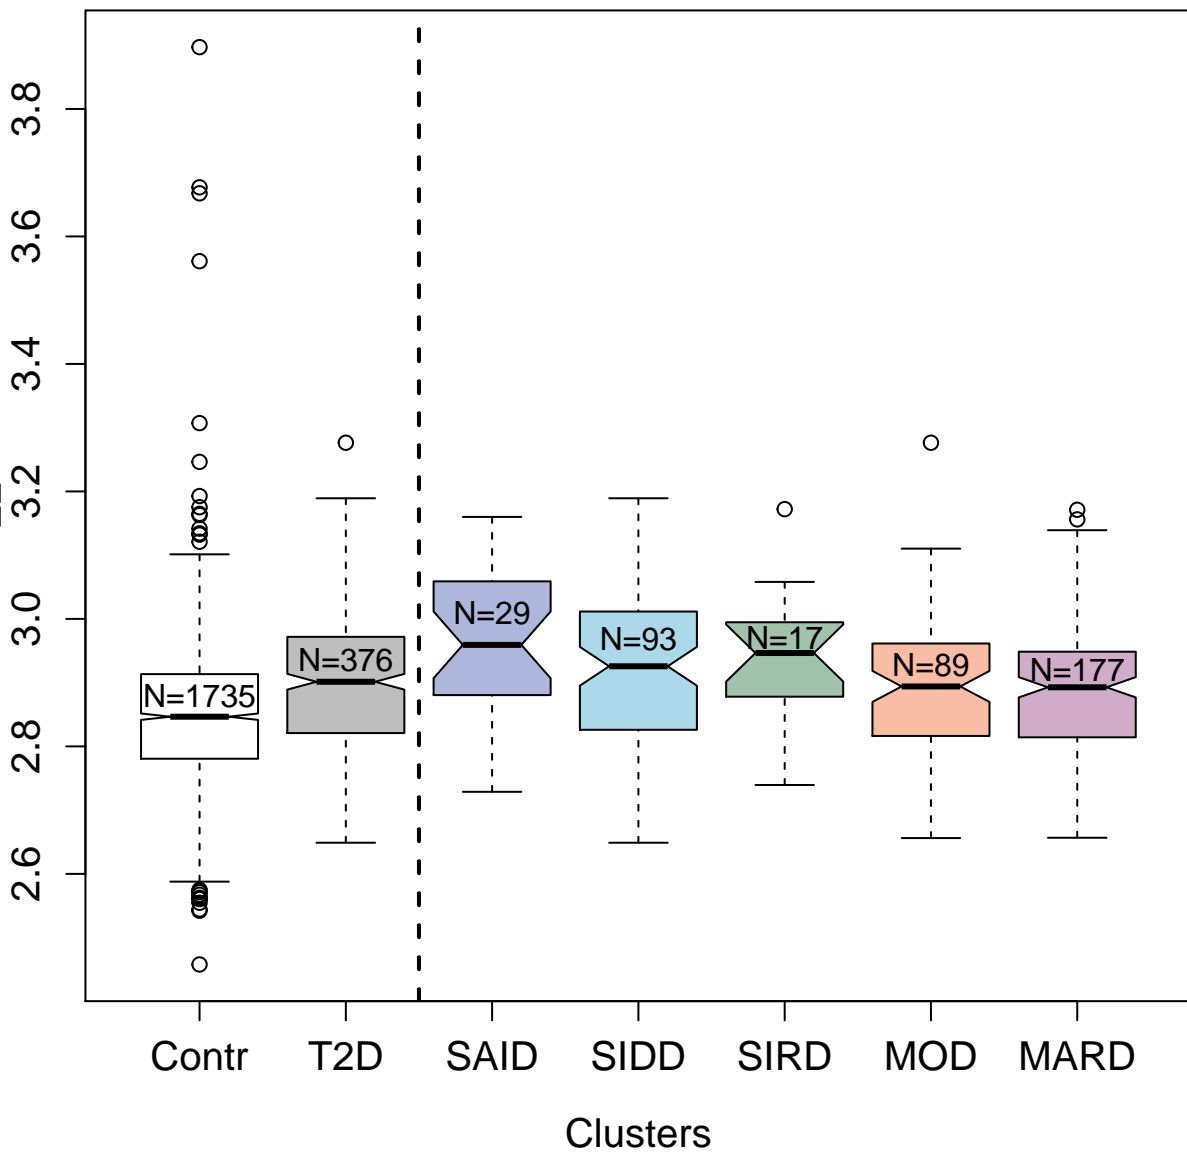

3291-30\_2 : Low affinity immunoglobulin epsilon

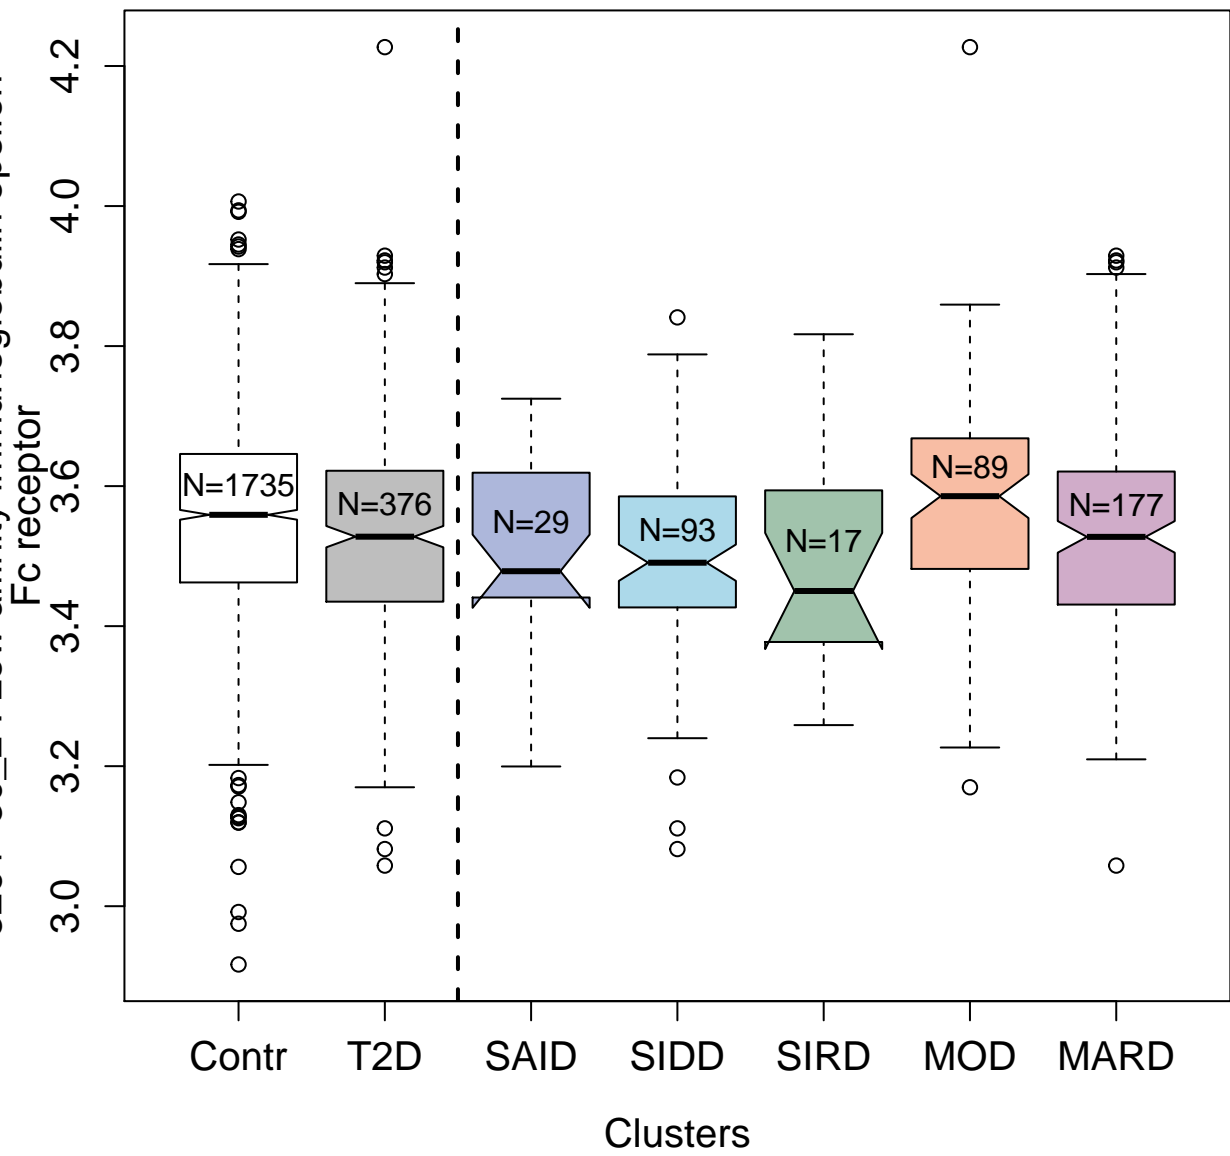

2813-11\_2 : Agouti-related protein

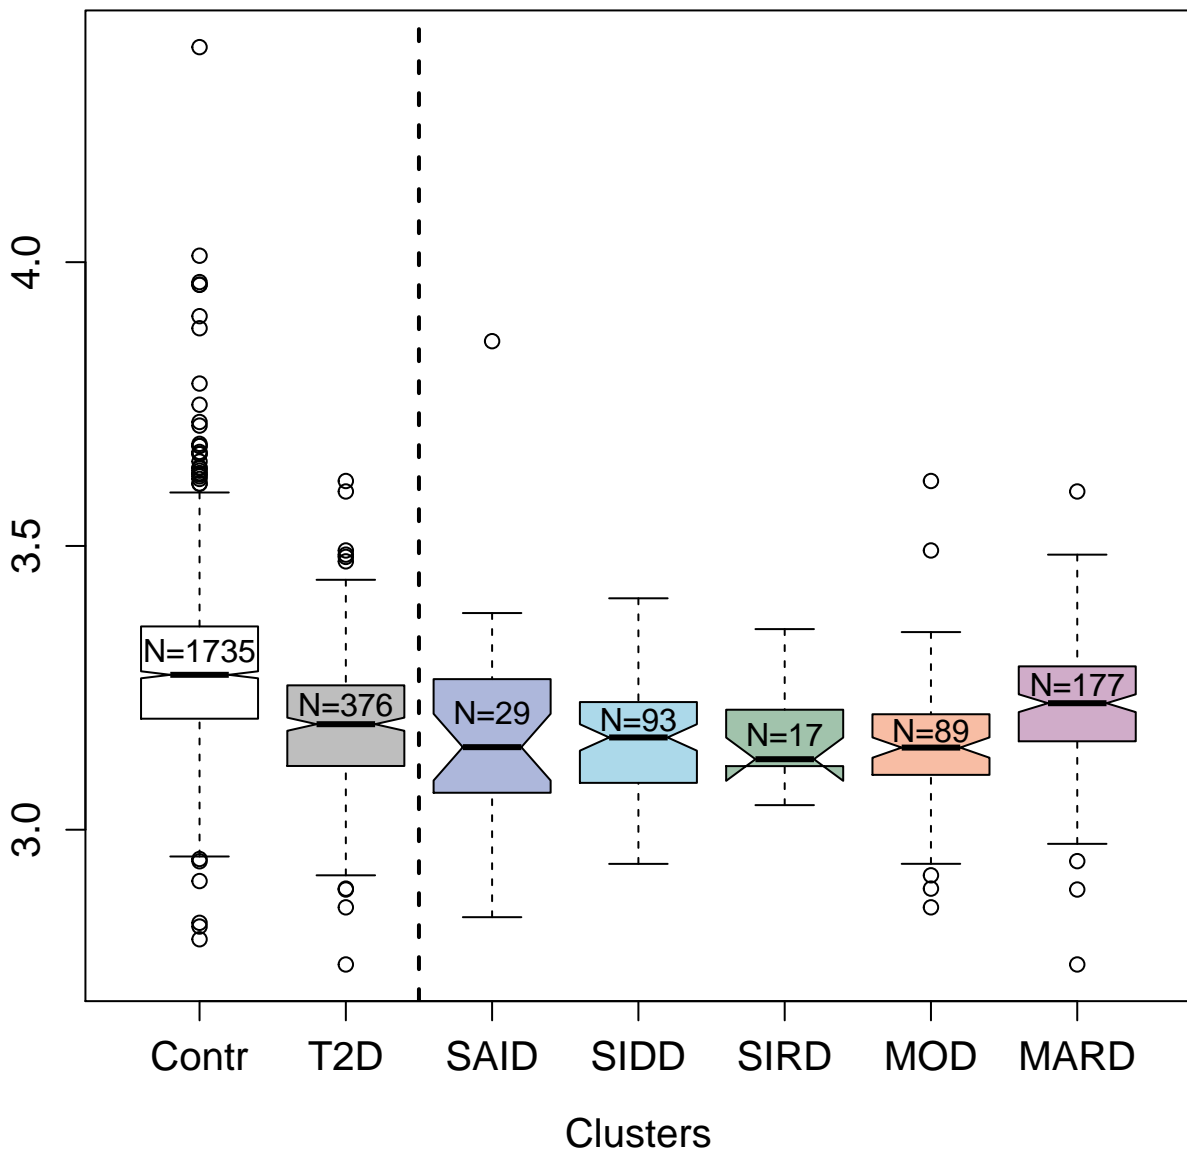

3888-8\_1 : Inhibitor of growth protein 1

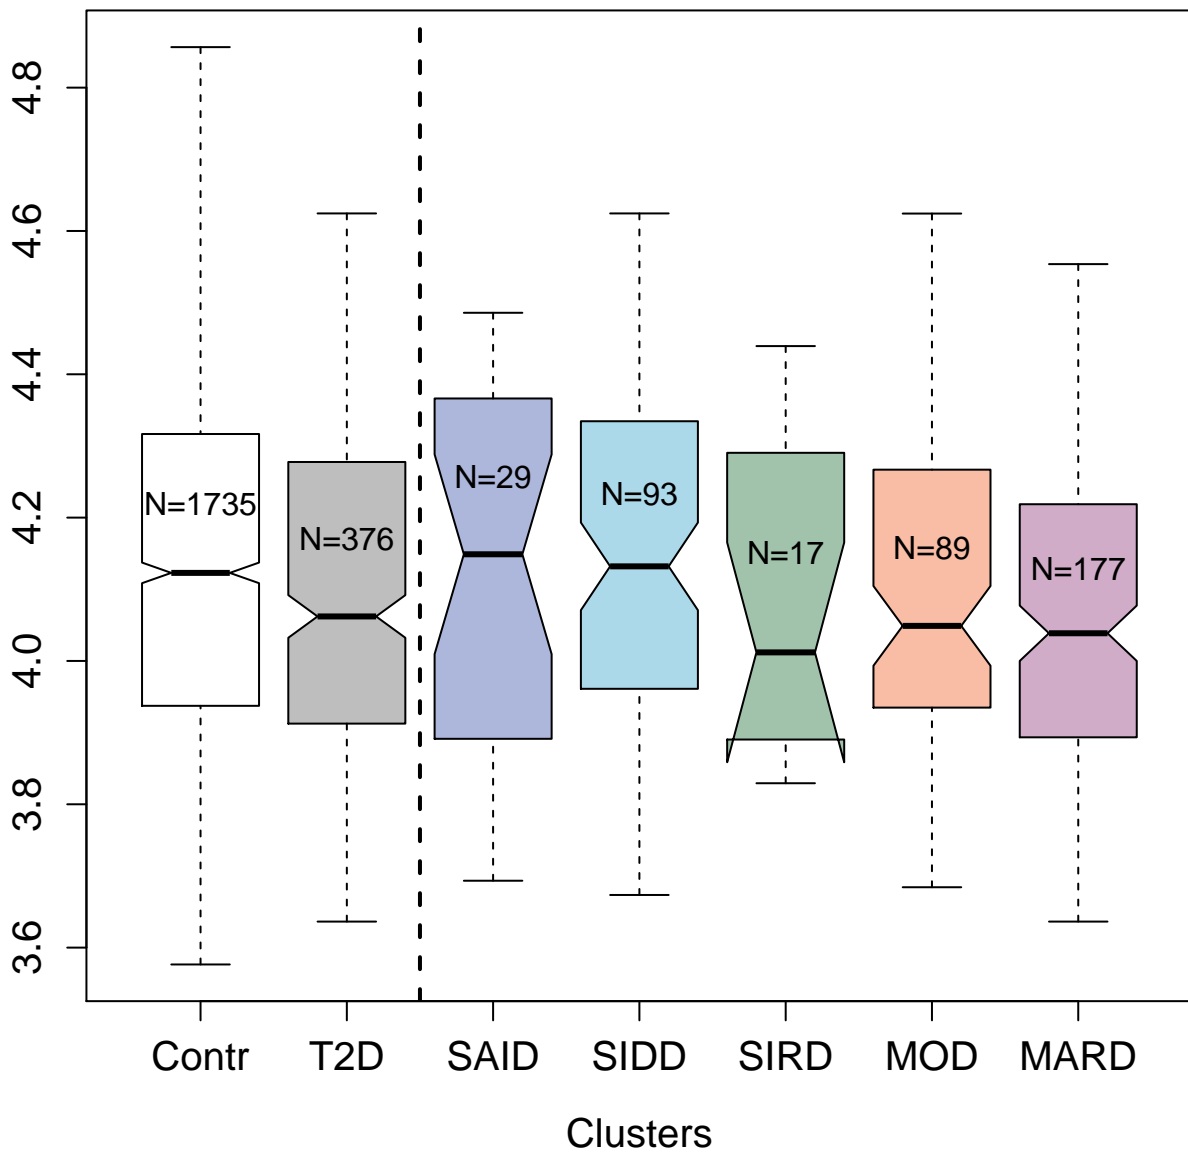

2670-67\_4 : Creatine kinase M-type

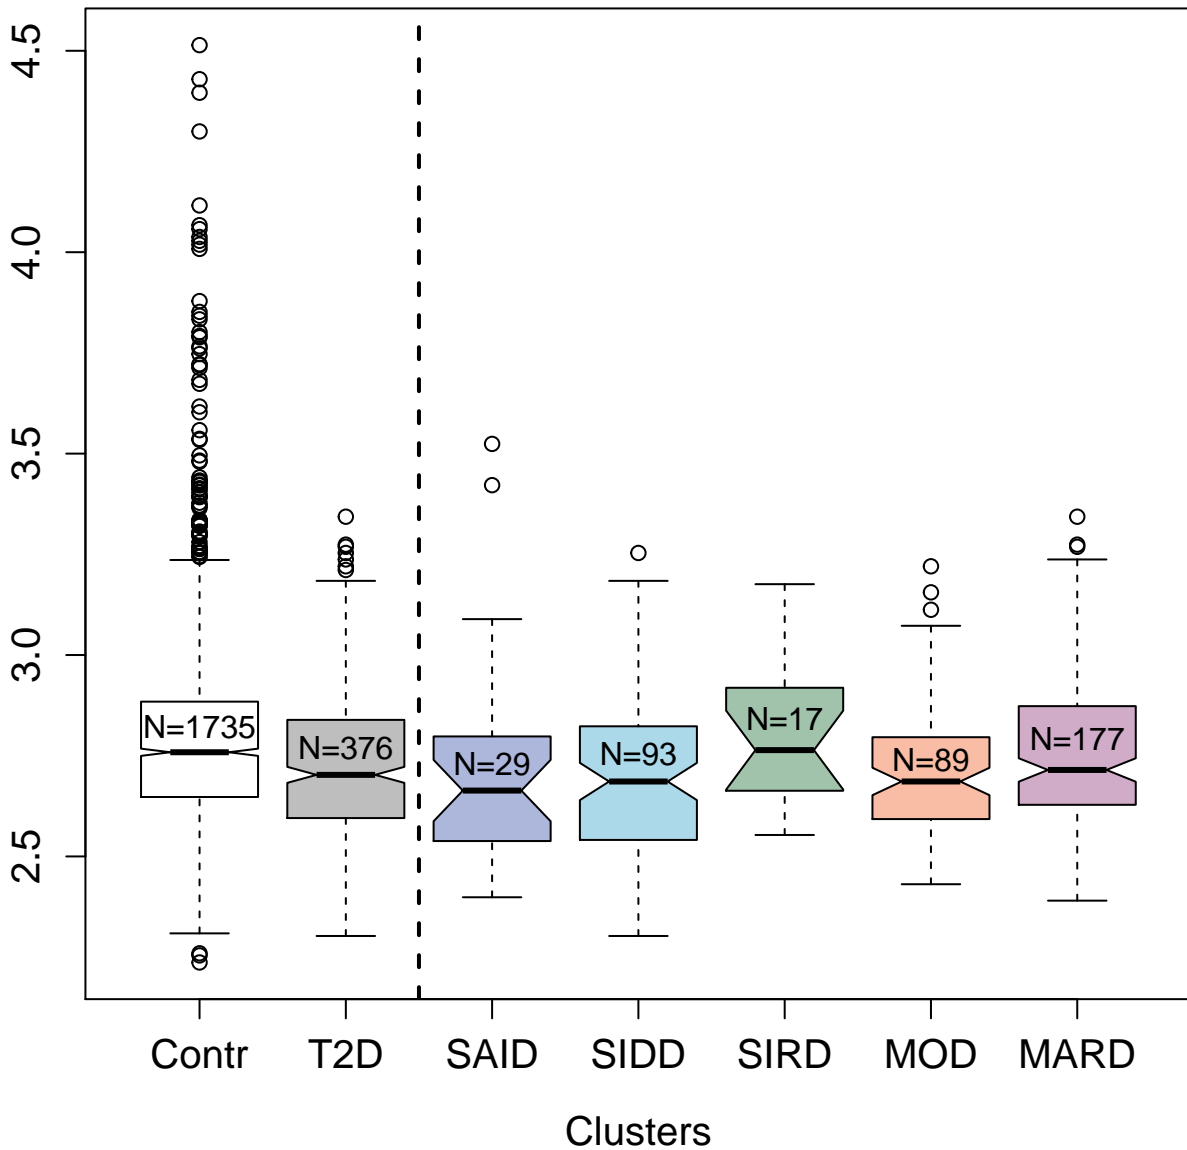

13109-82\_3 : Neuronal growth regulator 1

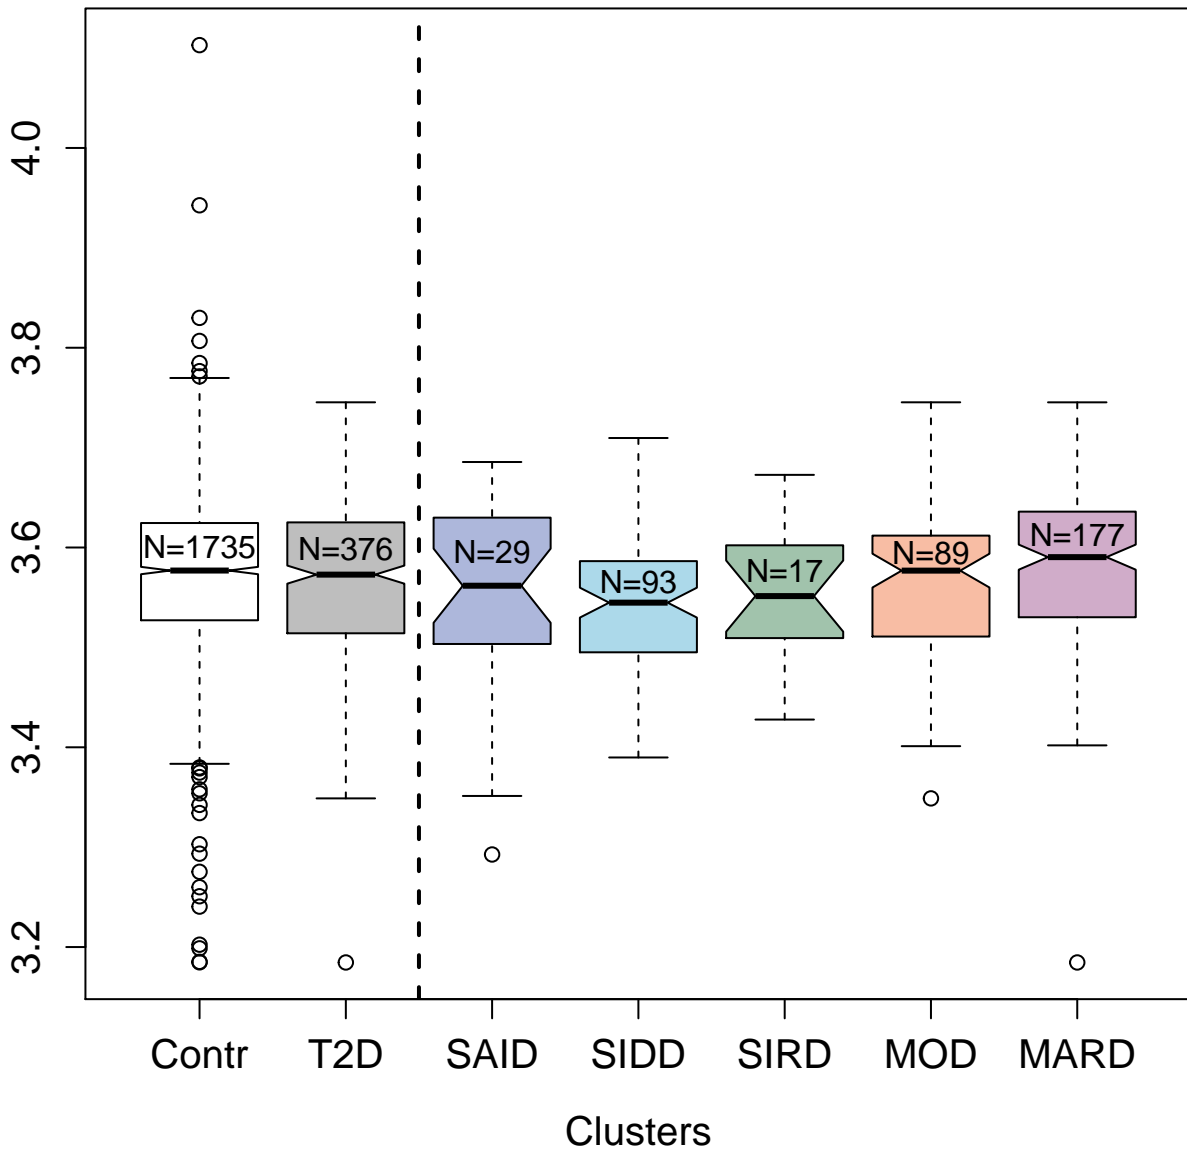

11096-57\_3 : HemK methyltransferase family member

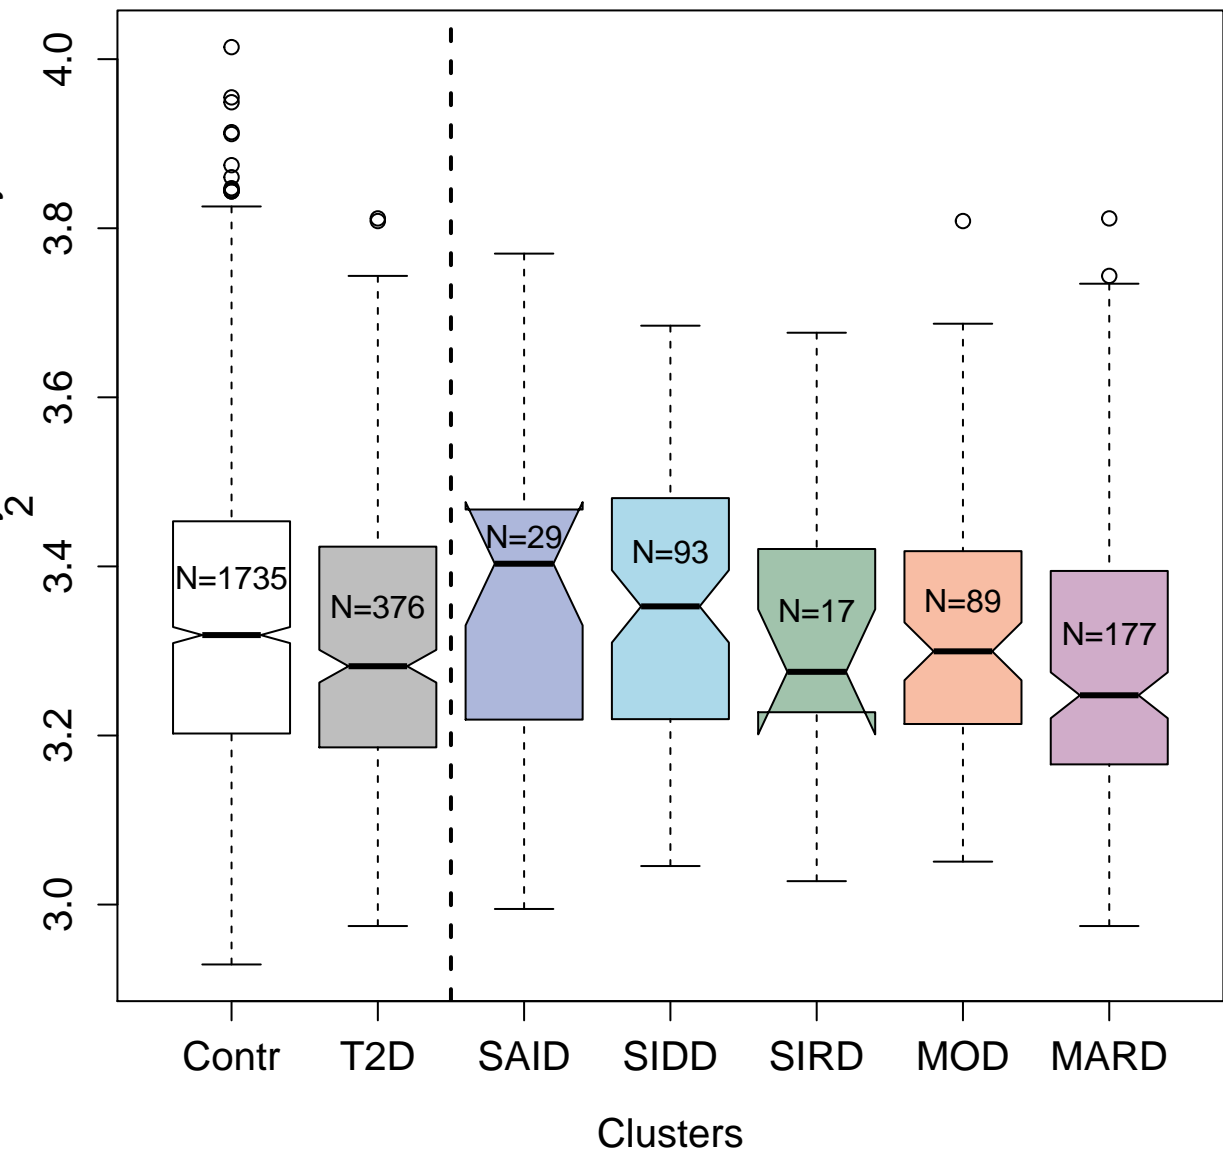





4564-2\_2 : Plexin-C1

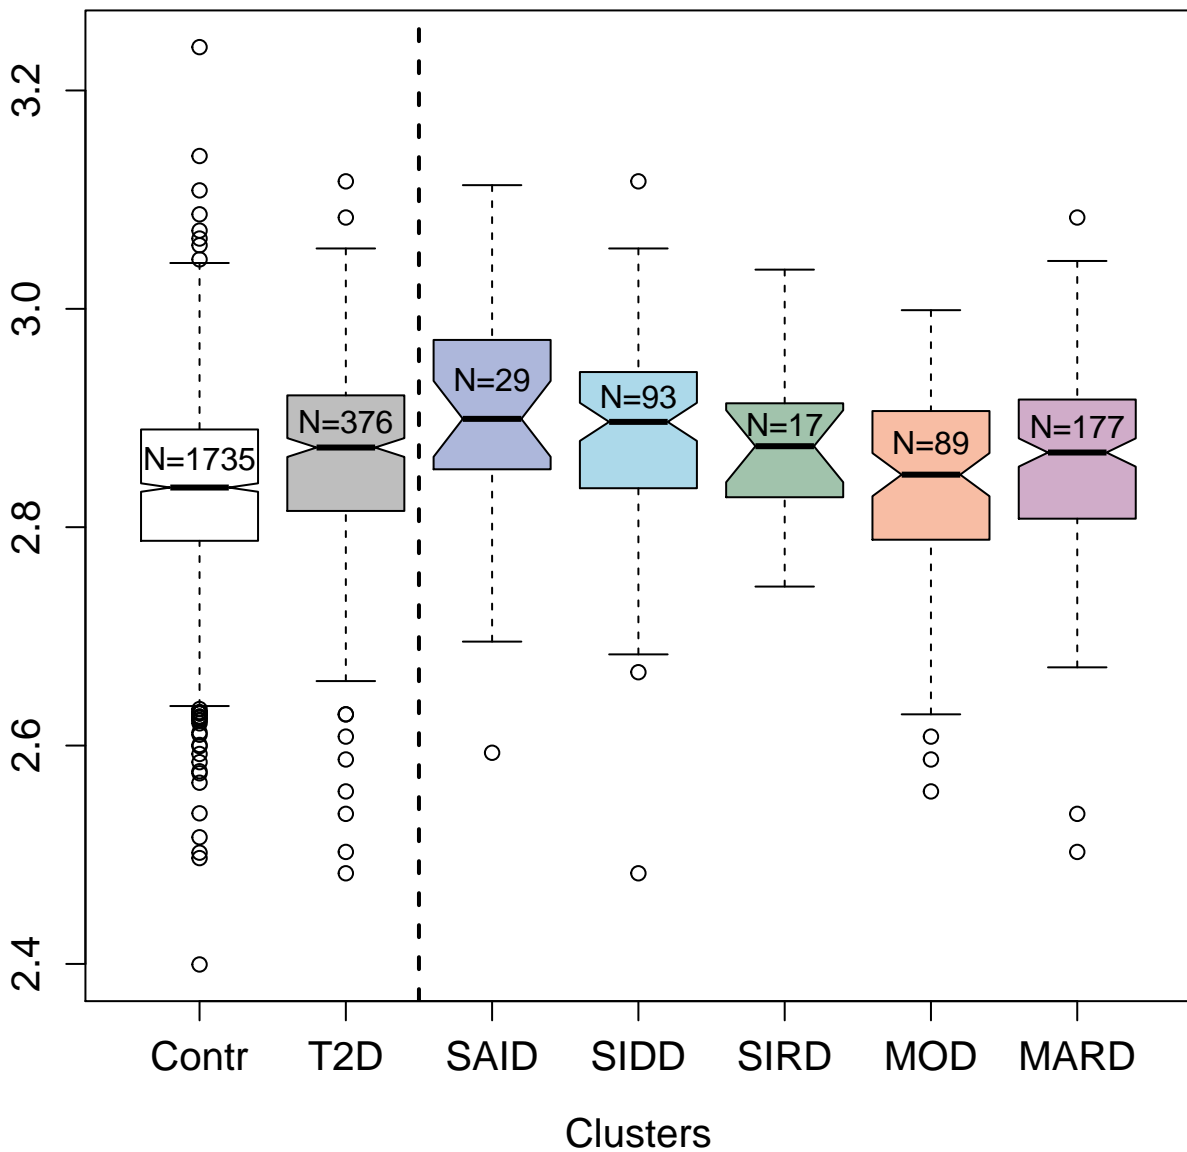

2516-57\_3 : C-C motif chemokine 21

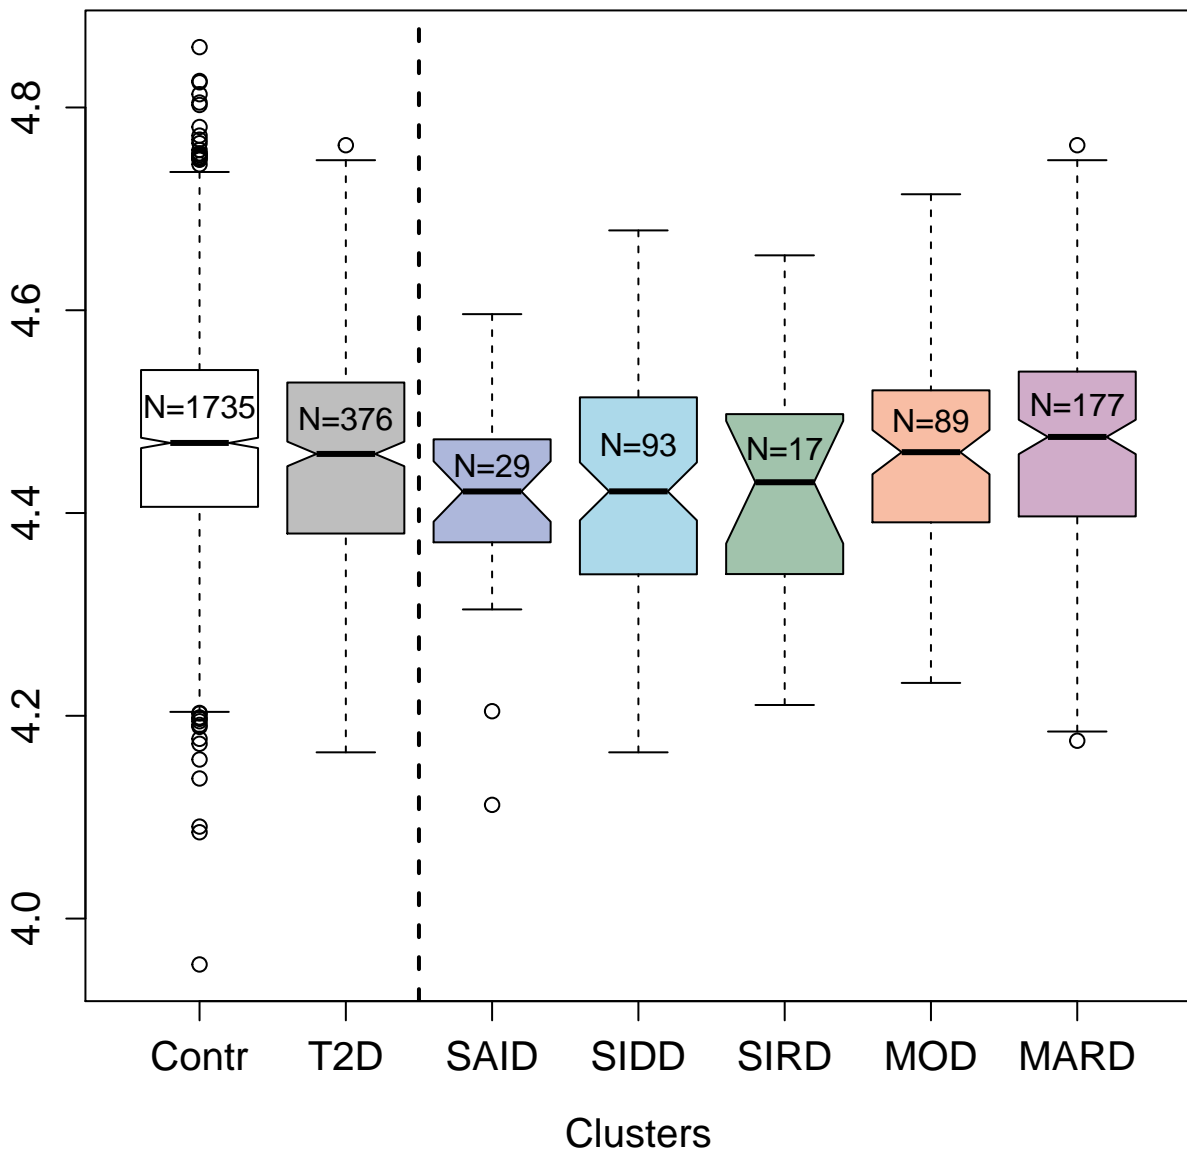

3897-61\_1 : Pyridoxal phosphate phosphatase

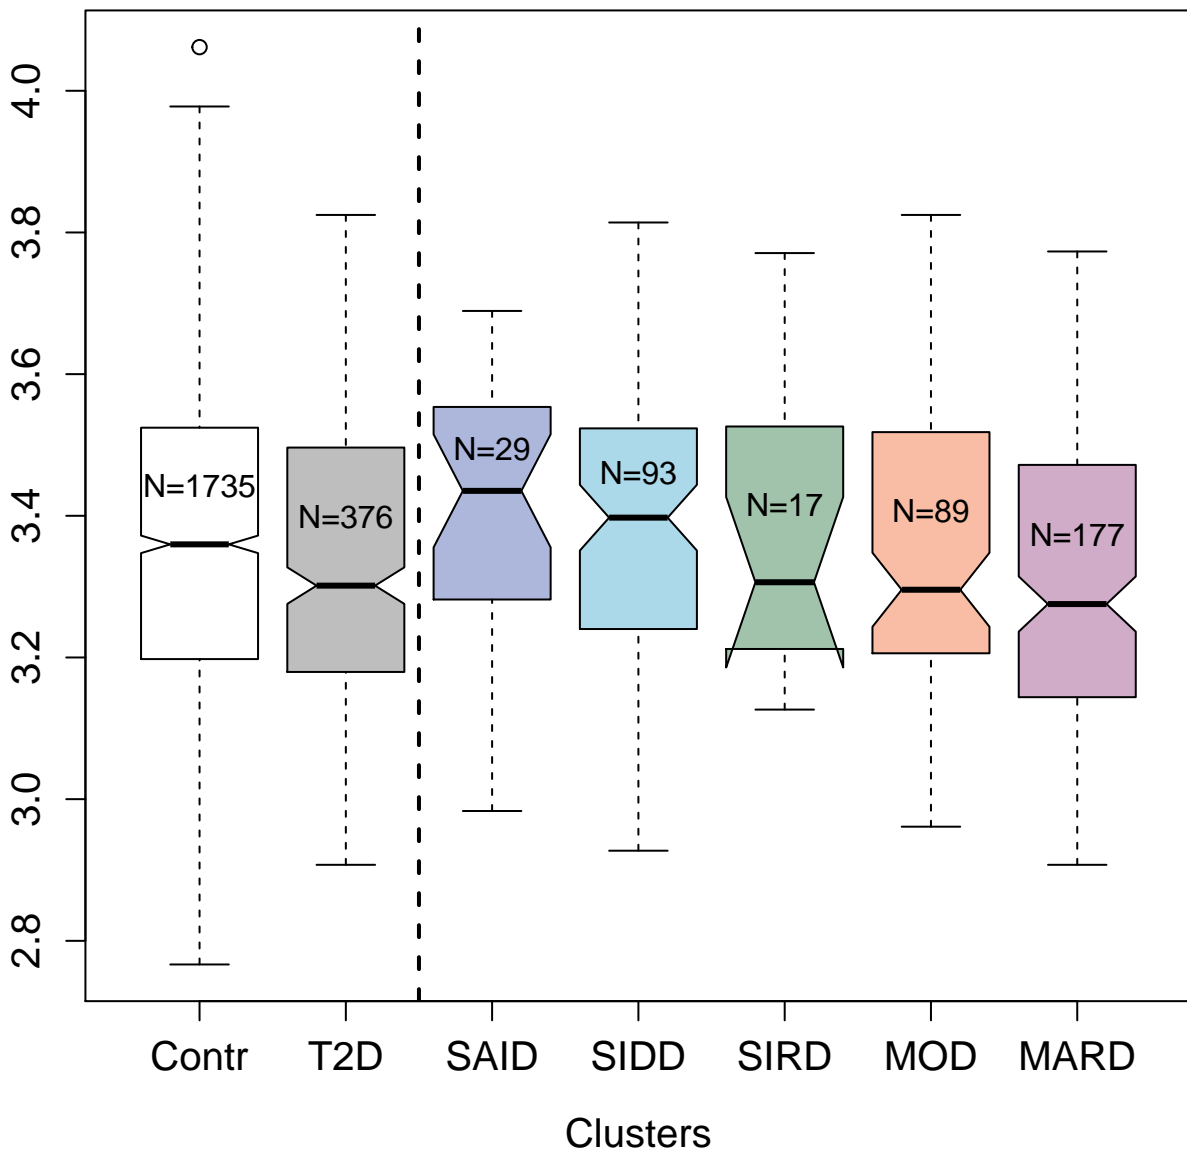

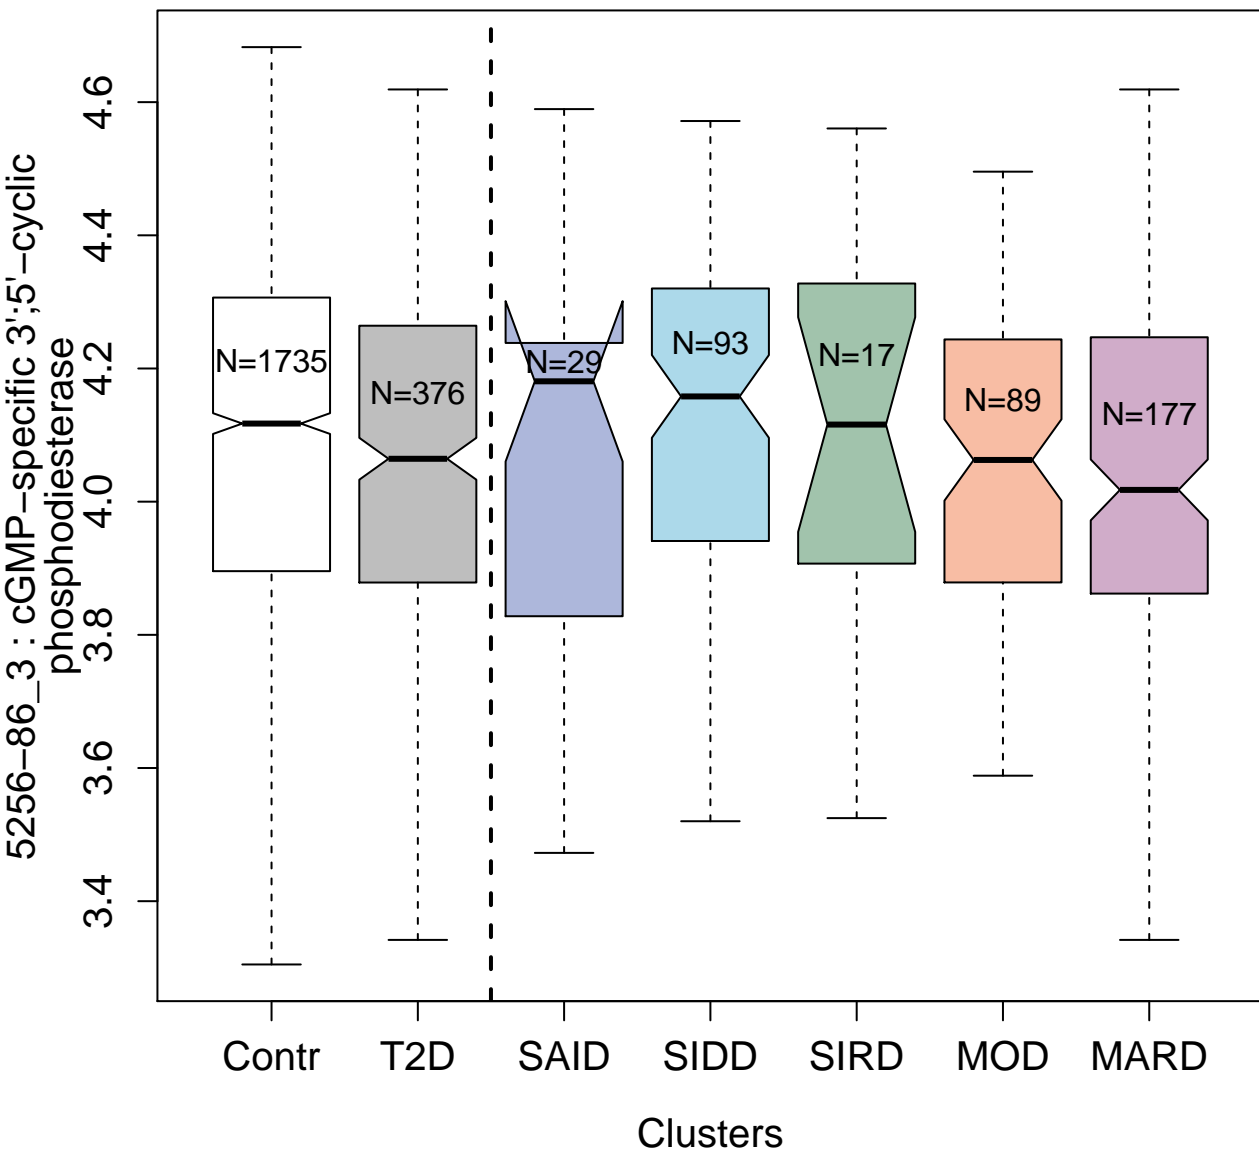

5034-79\_1 : Trypsin-2

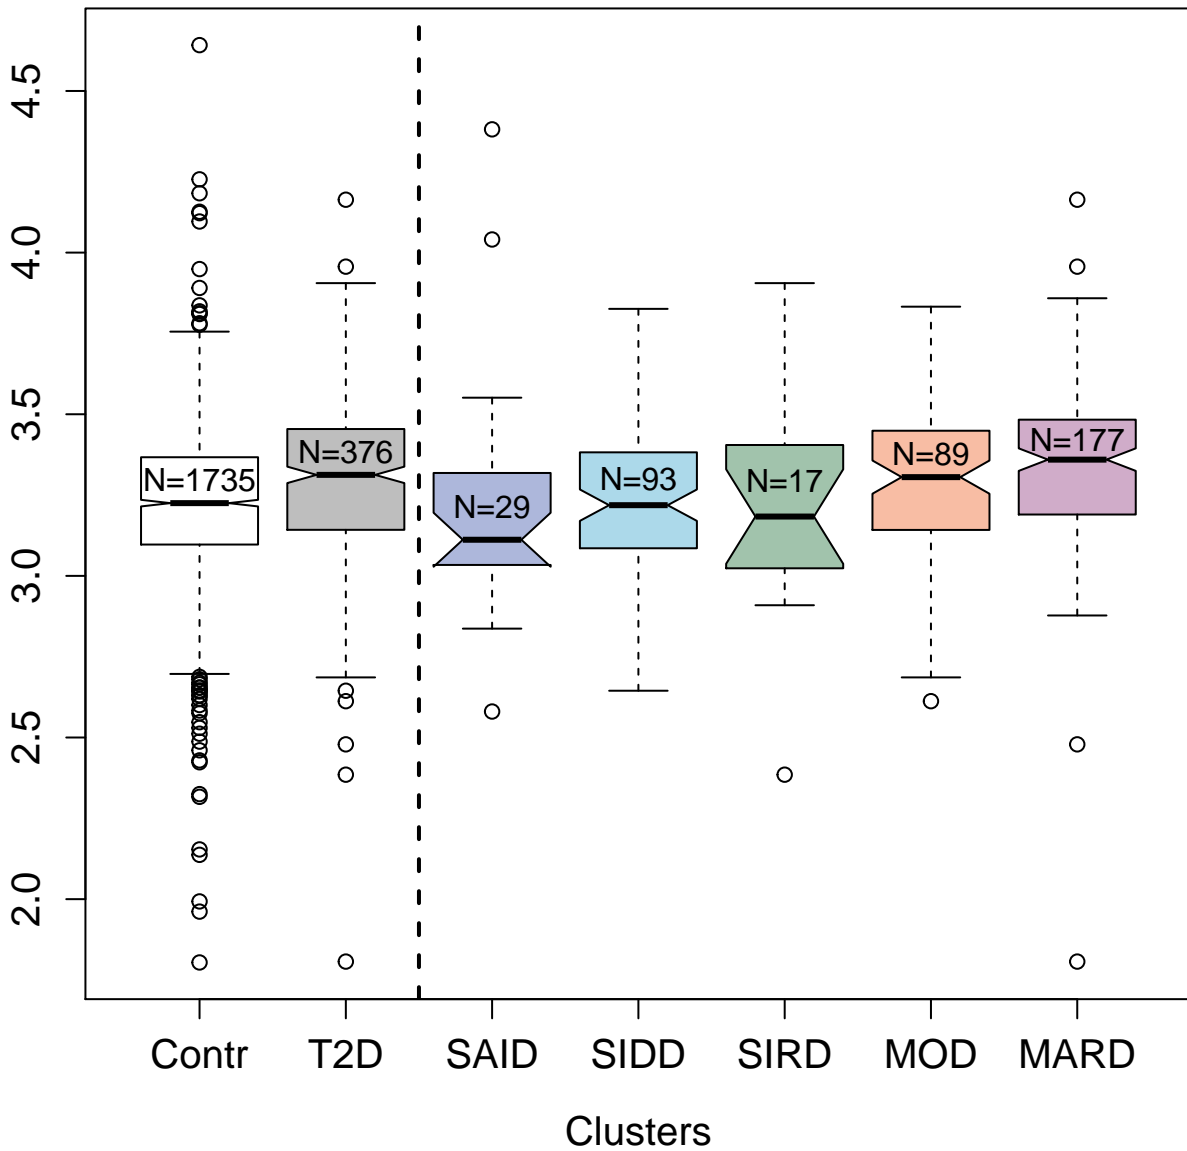

3848-14\_2 : Glyceraldehyde-3-phosphate  
dehydrogenase

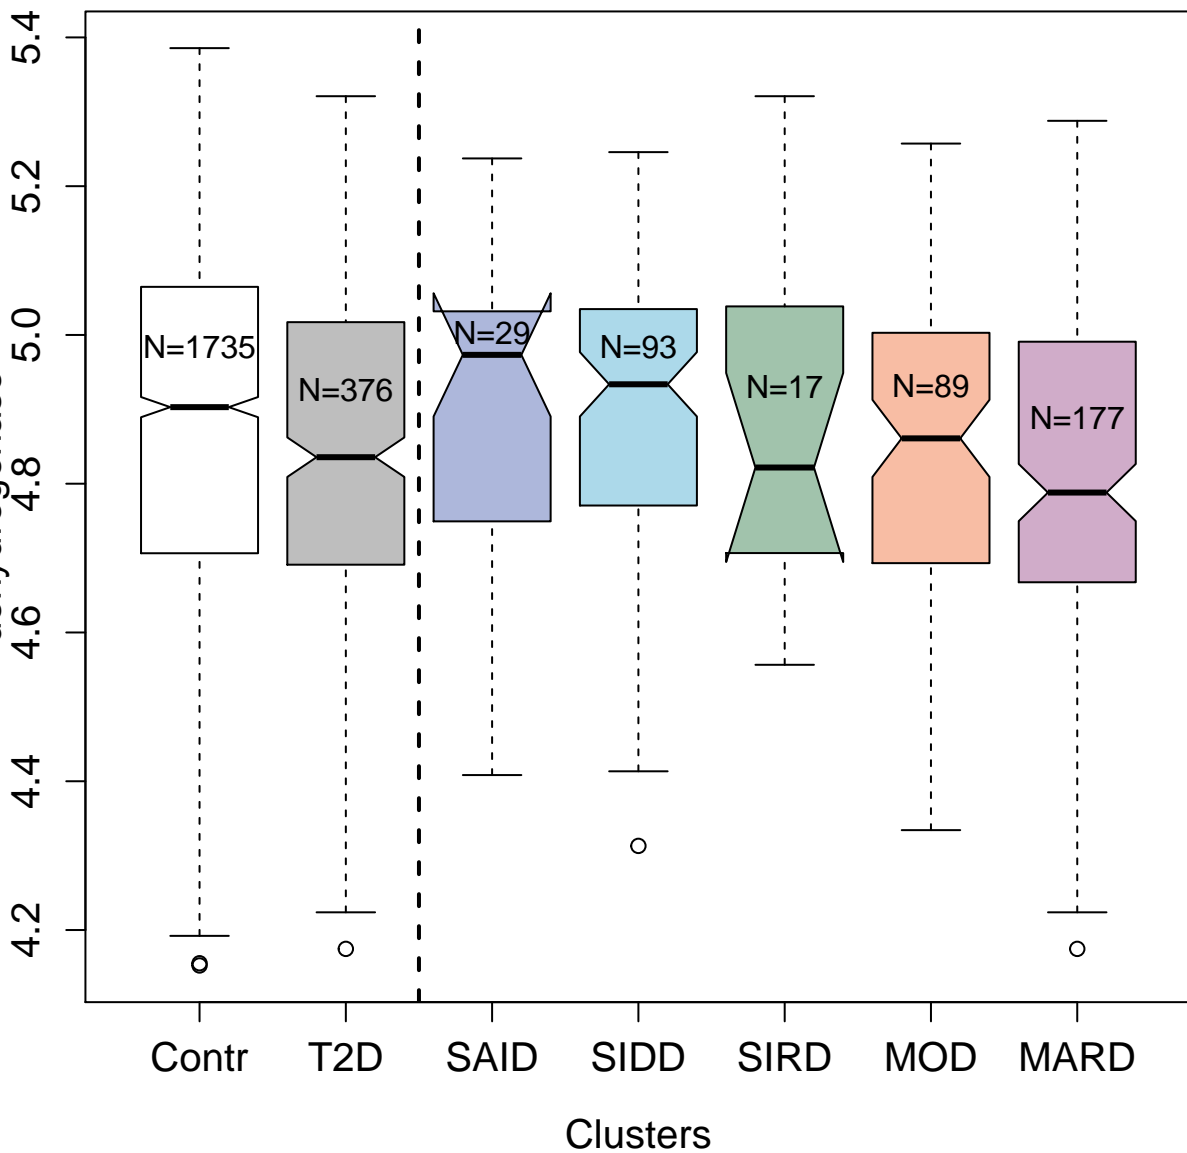

3628-3\_4 : Dual specificity mitogen-activated protein kinase kinase 2

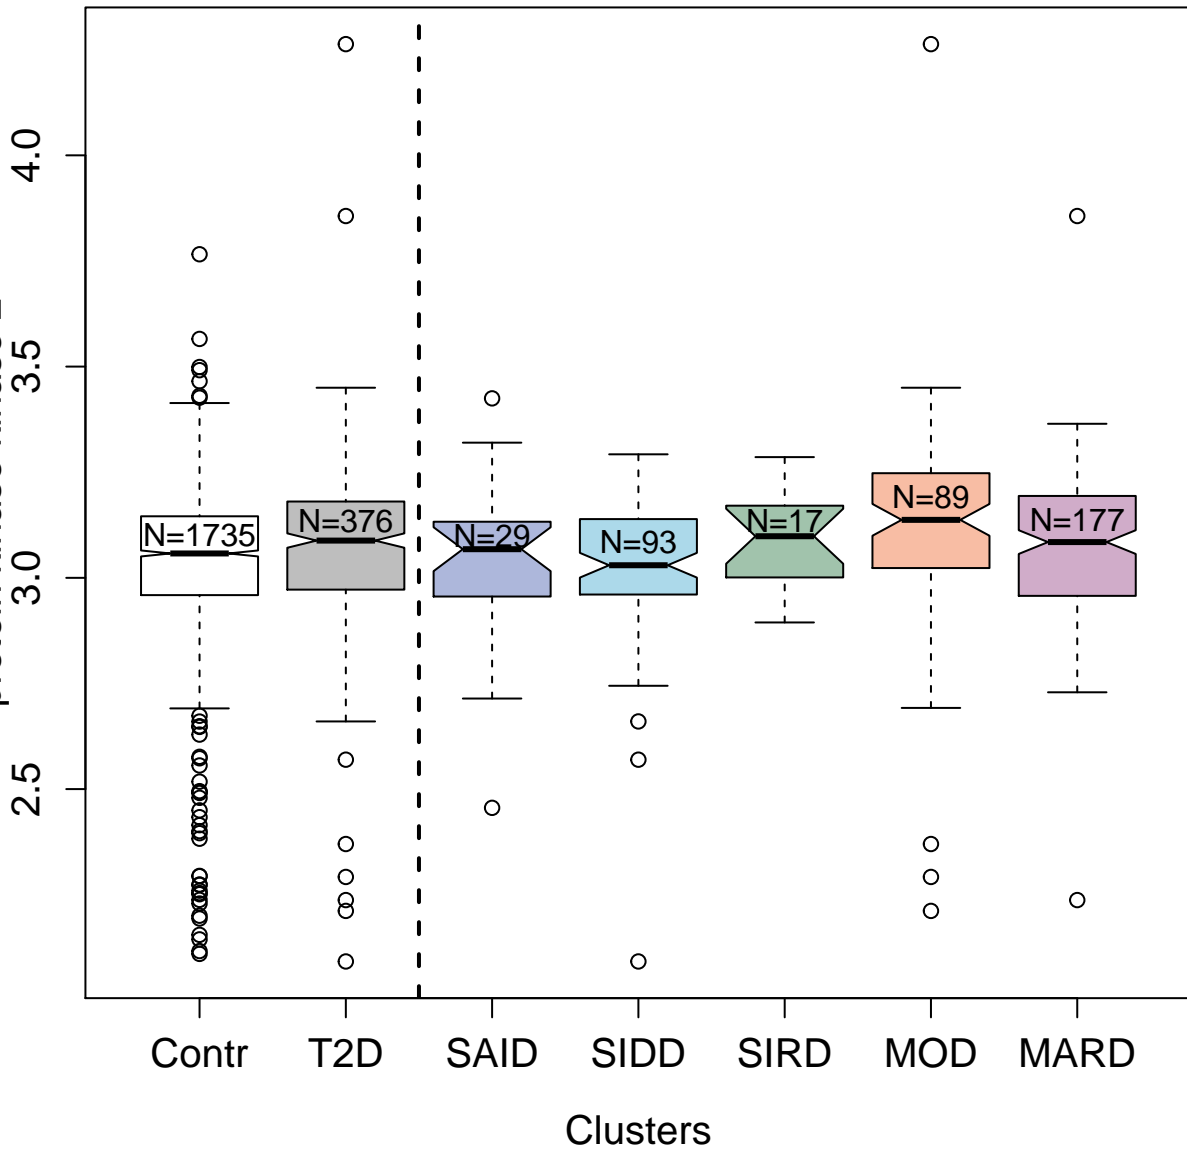

4883-56\_2 : Insulin

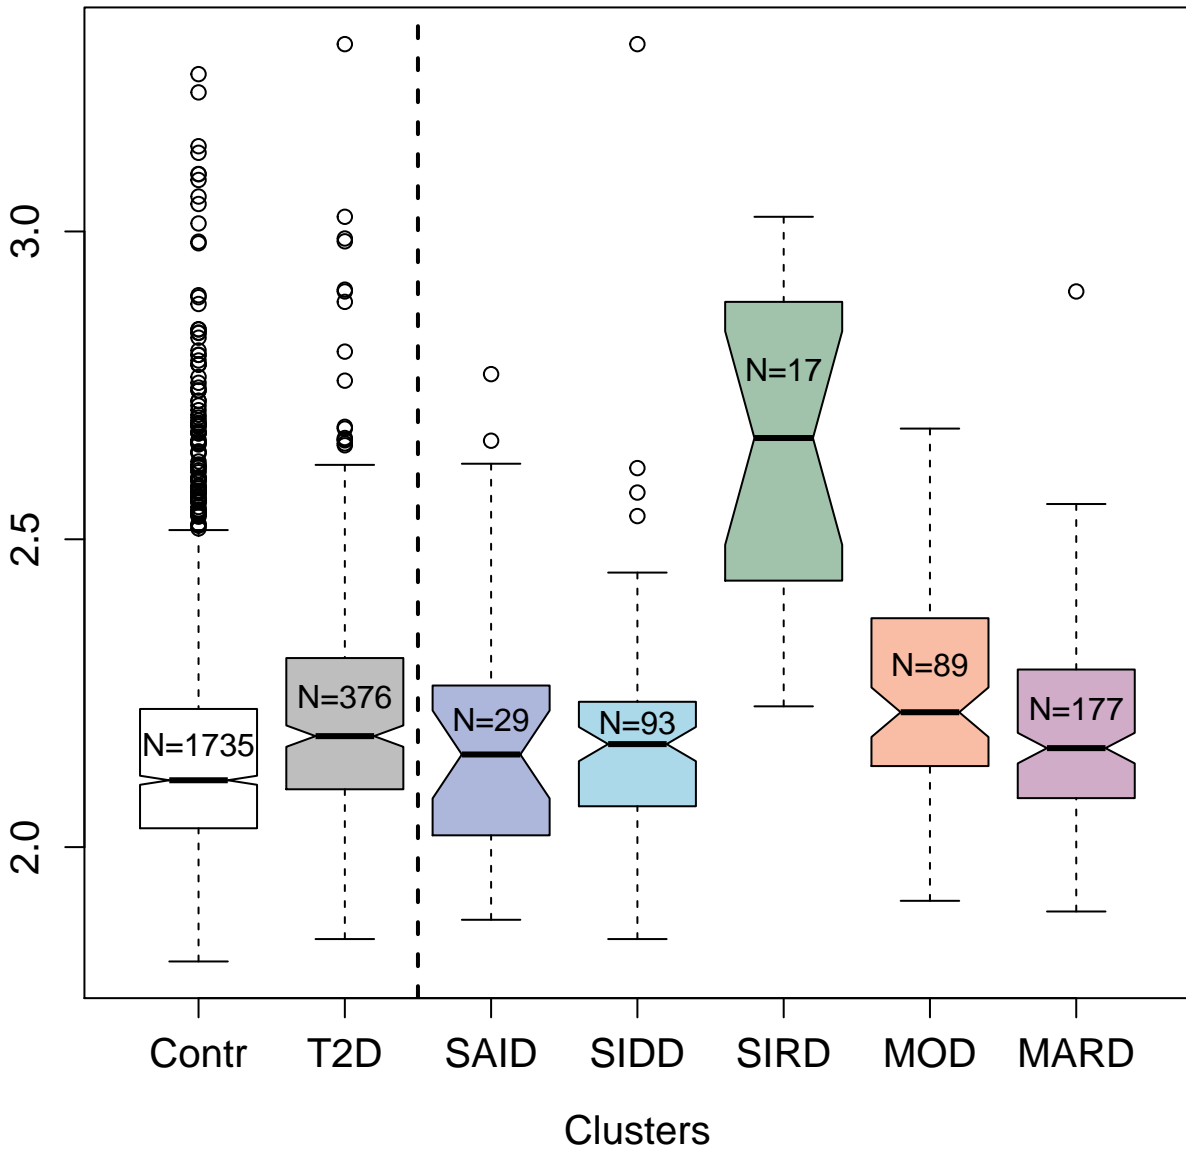



3879-50\_1 : Hsp90 co-chaperone Cdc37

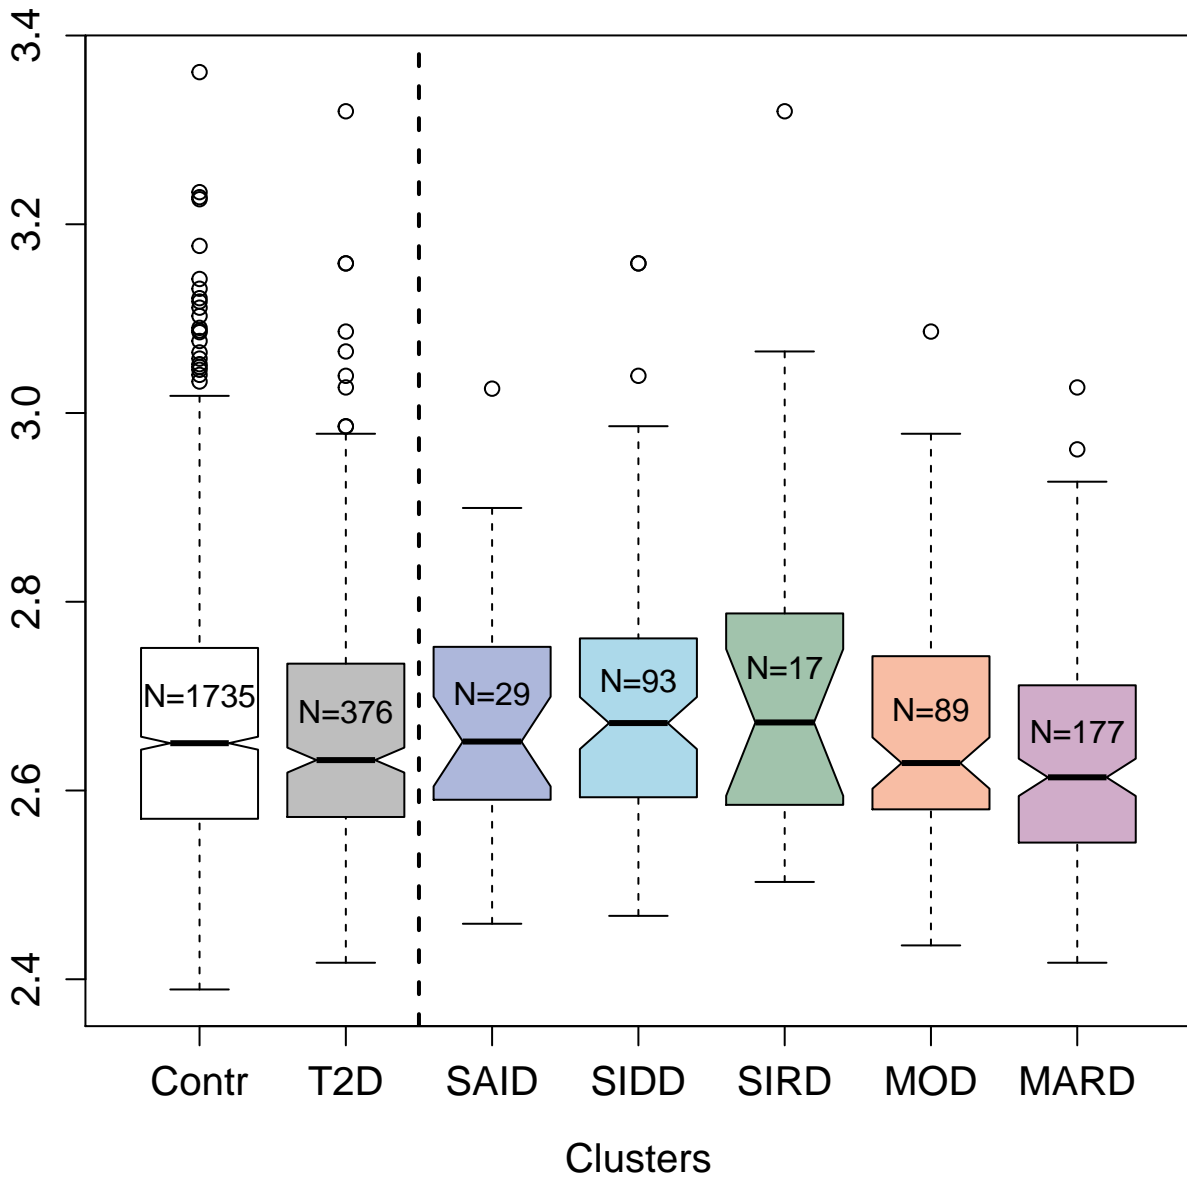



4163-5\_2 : Histone H2A.z

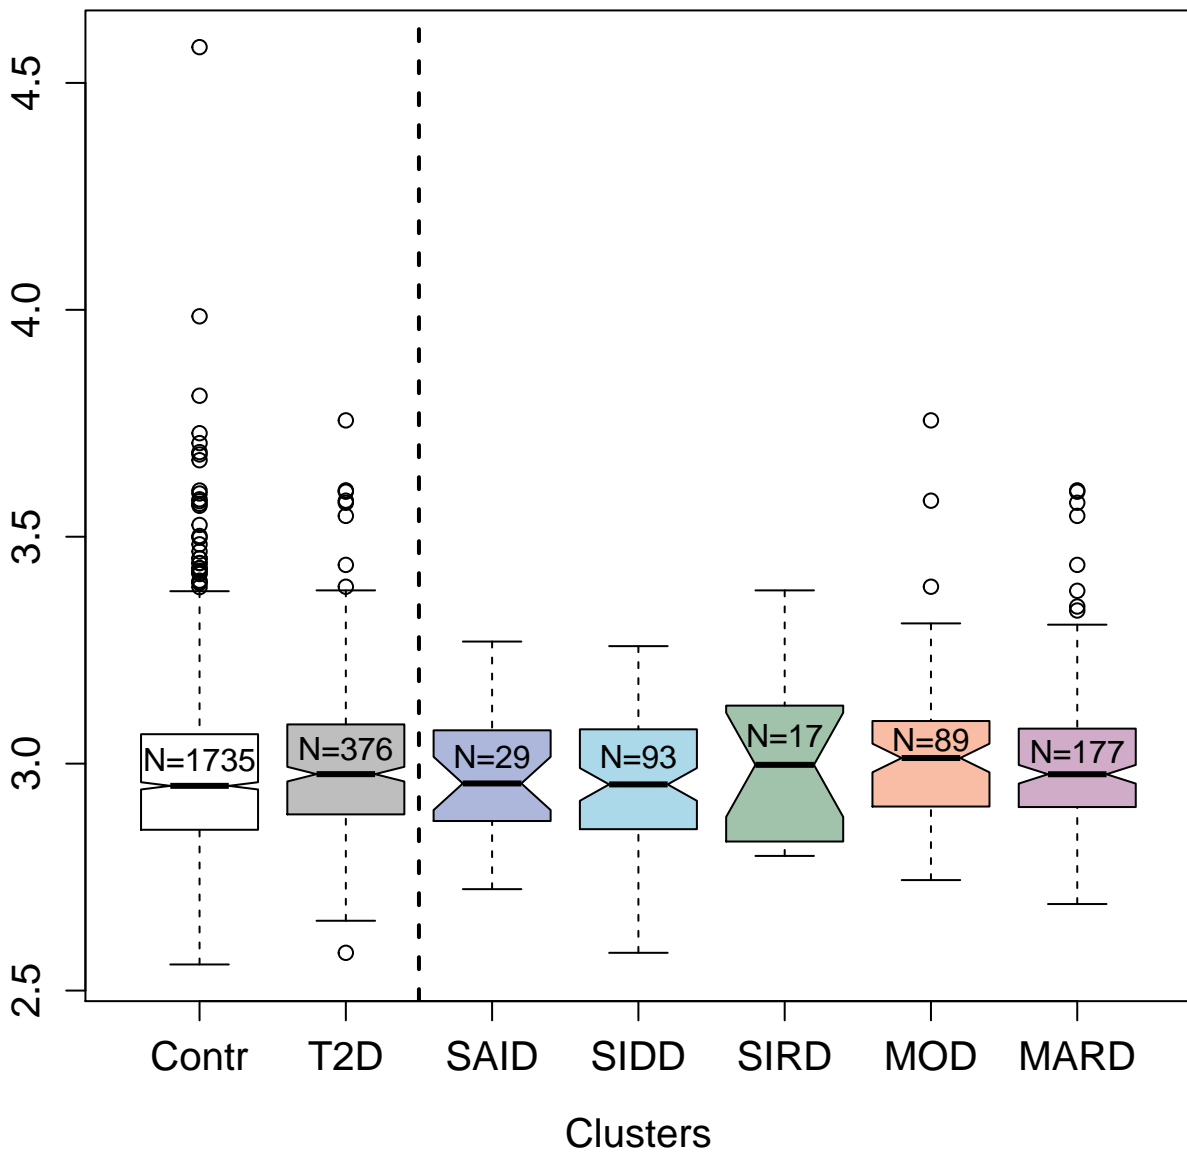

2846-24\_2 : Ubiquitin+1; truncated mutation for

UbbB

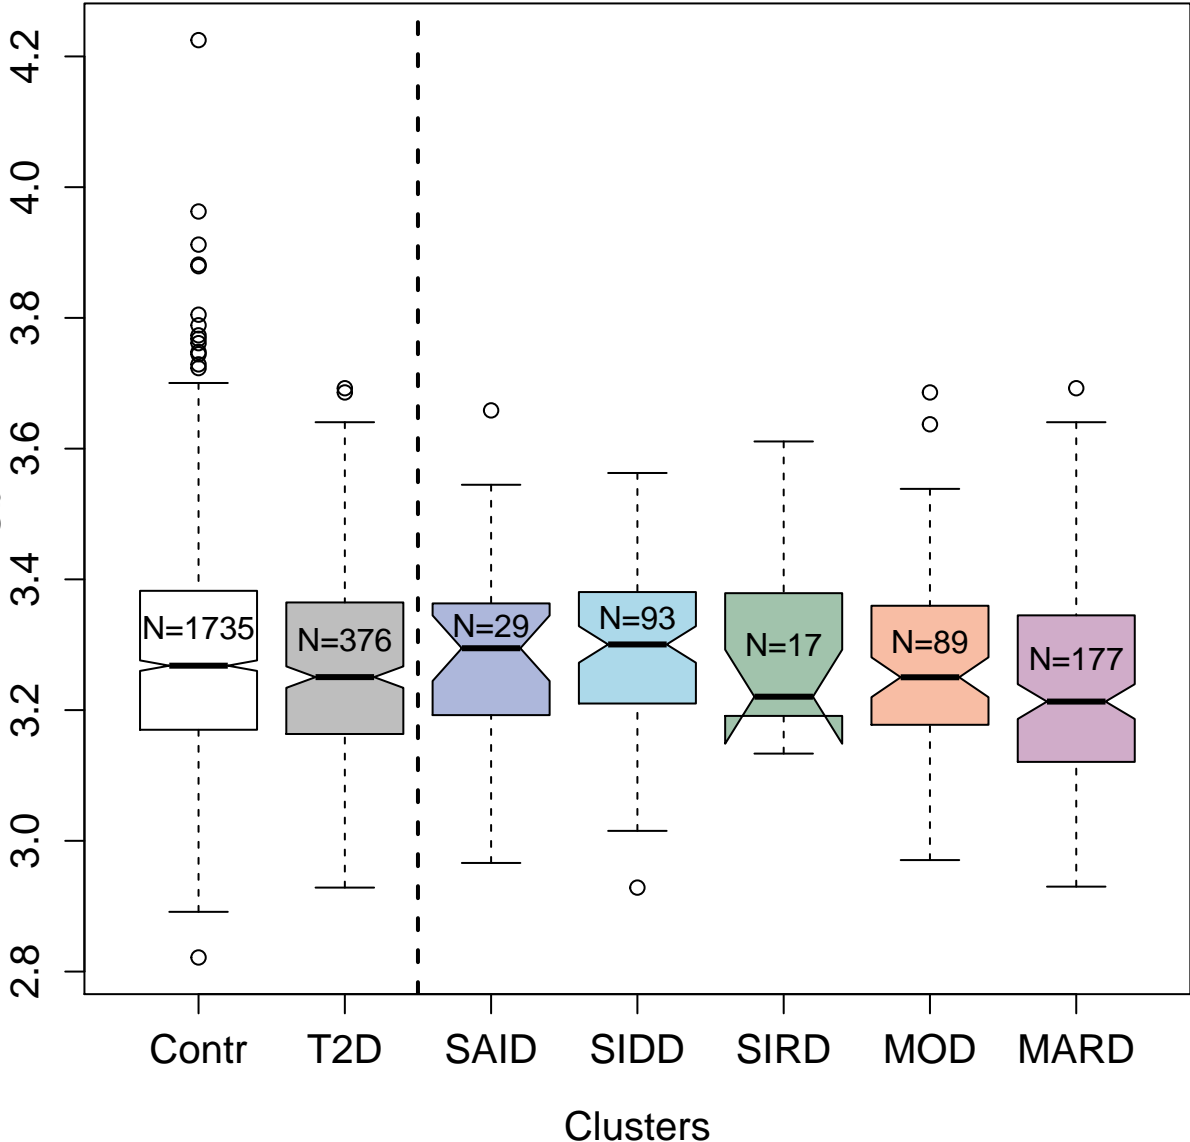

3343-1\_4 : Aminoacylase-1

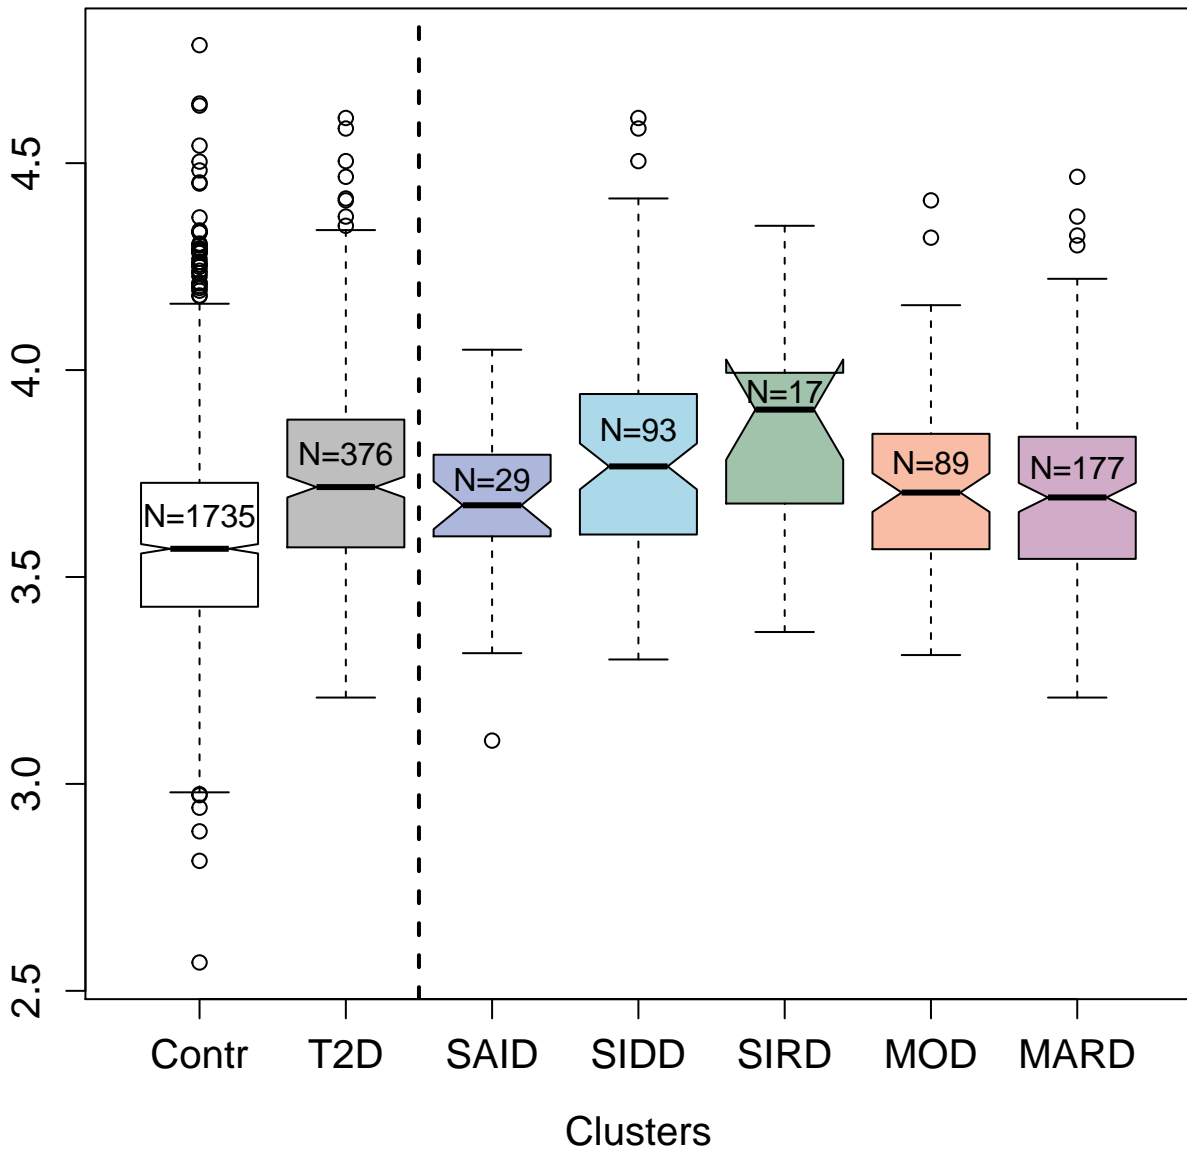

2796-62\_2 : Fibrinogen

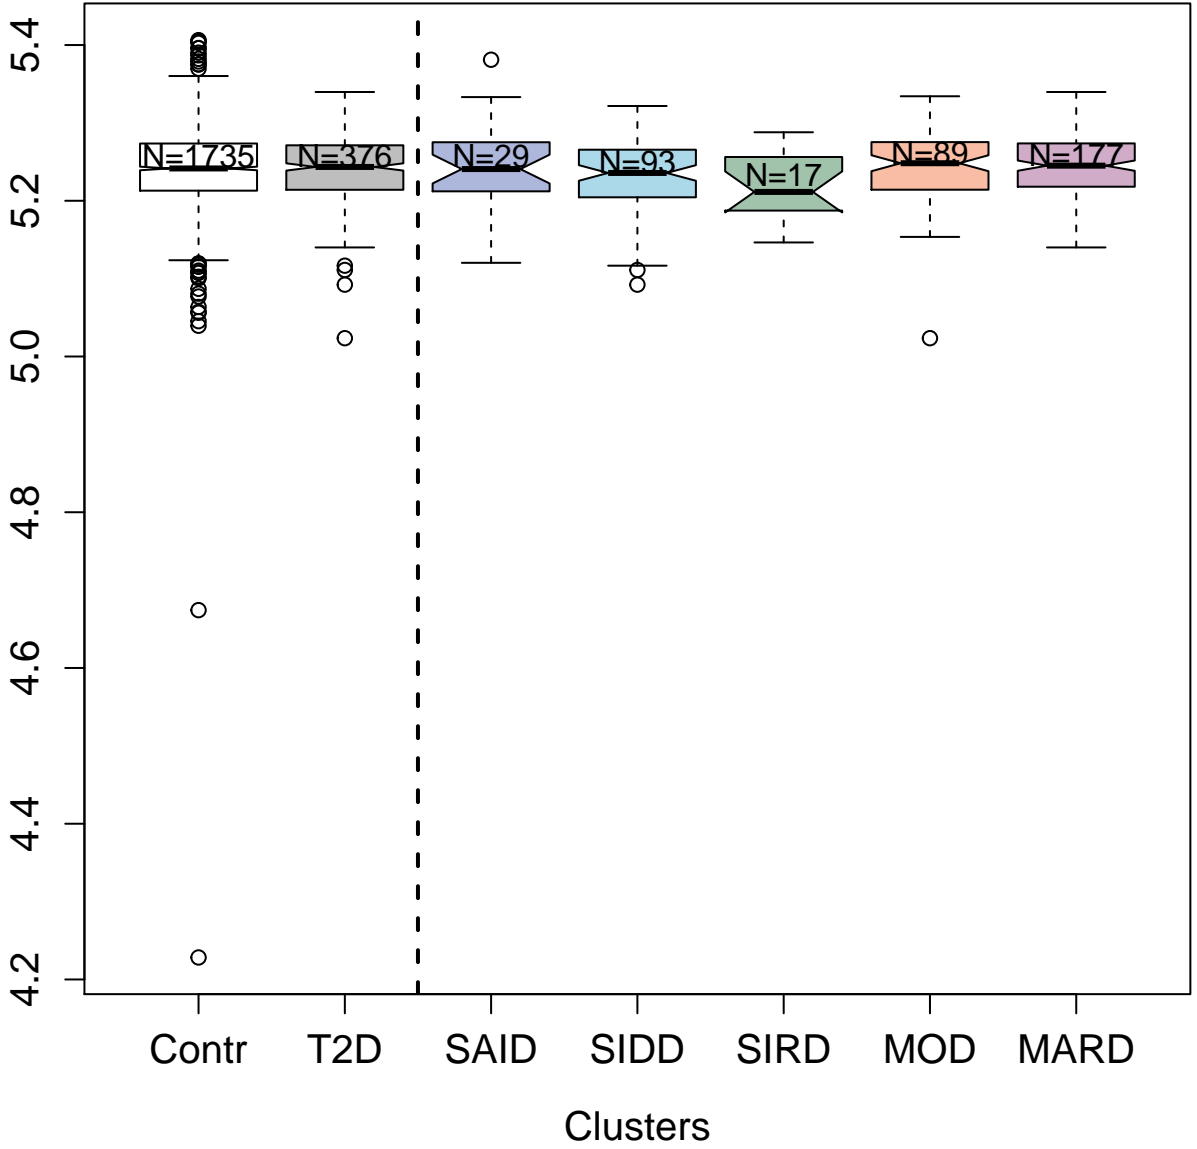

5870-23\_2 : Bcl2-associated agonist of cell death

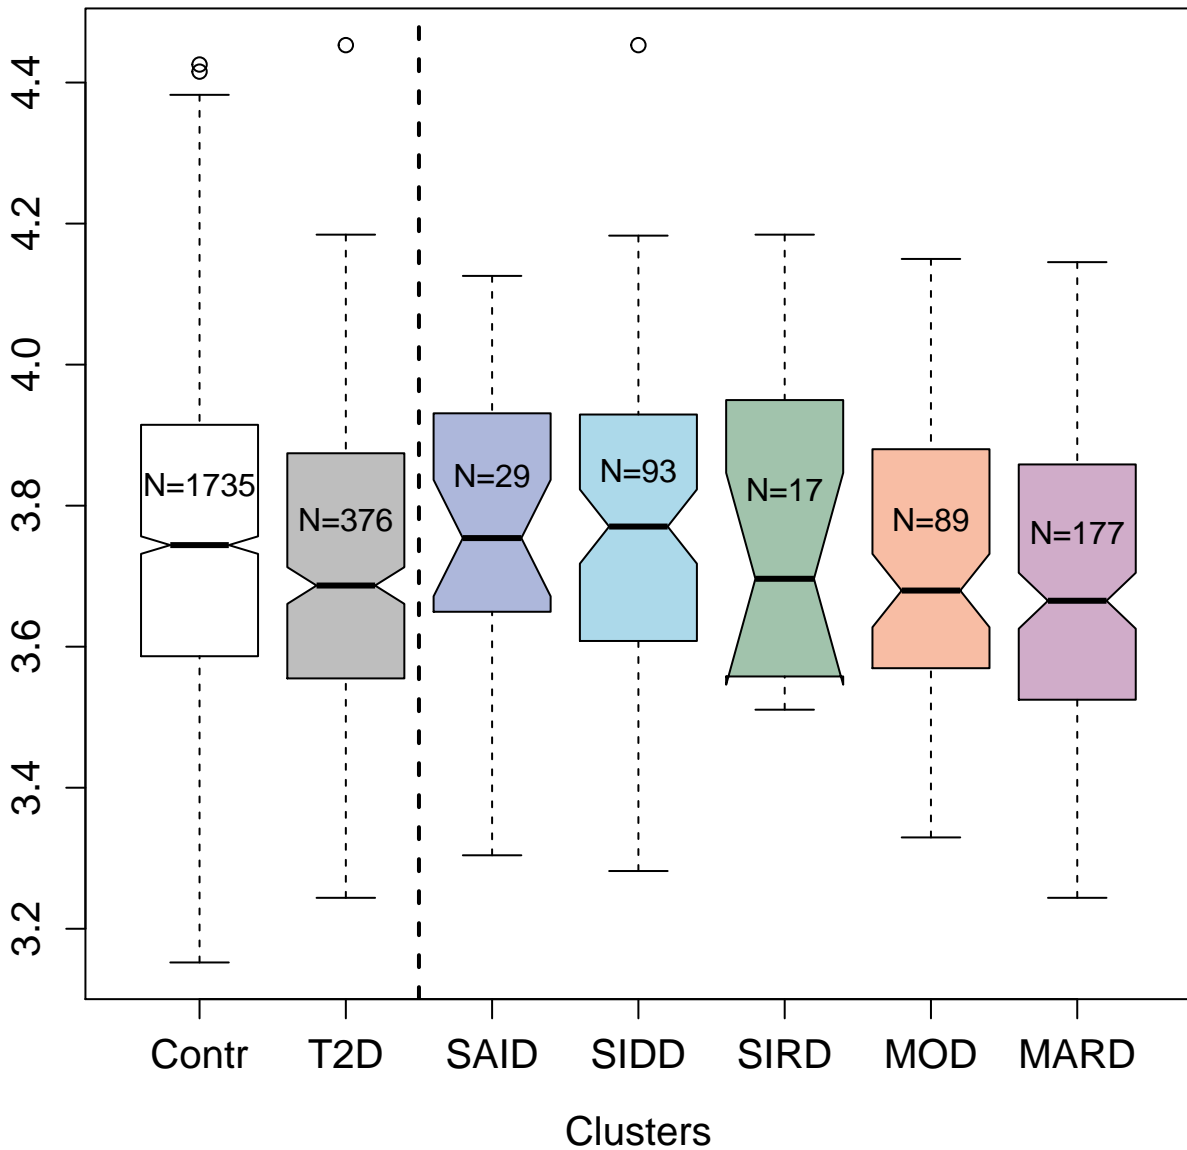

5092-51\_3 : Protein jagged-1

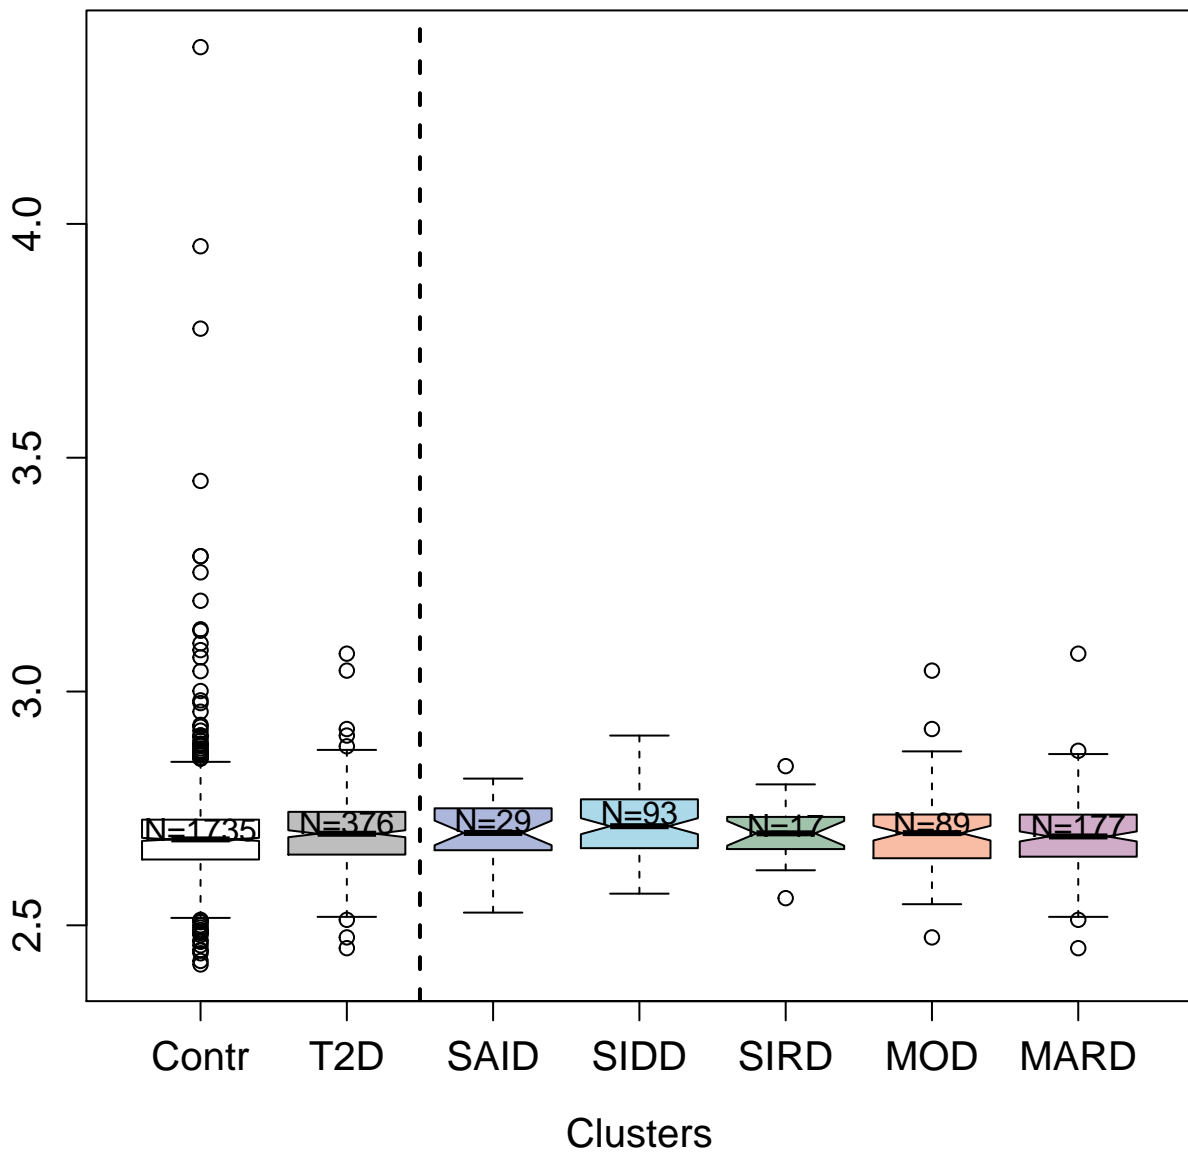



3580-25\_8 : Alpha-1-antitrypsin

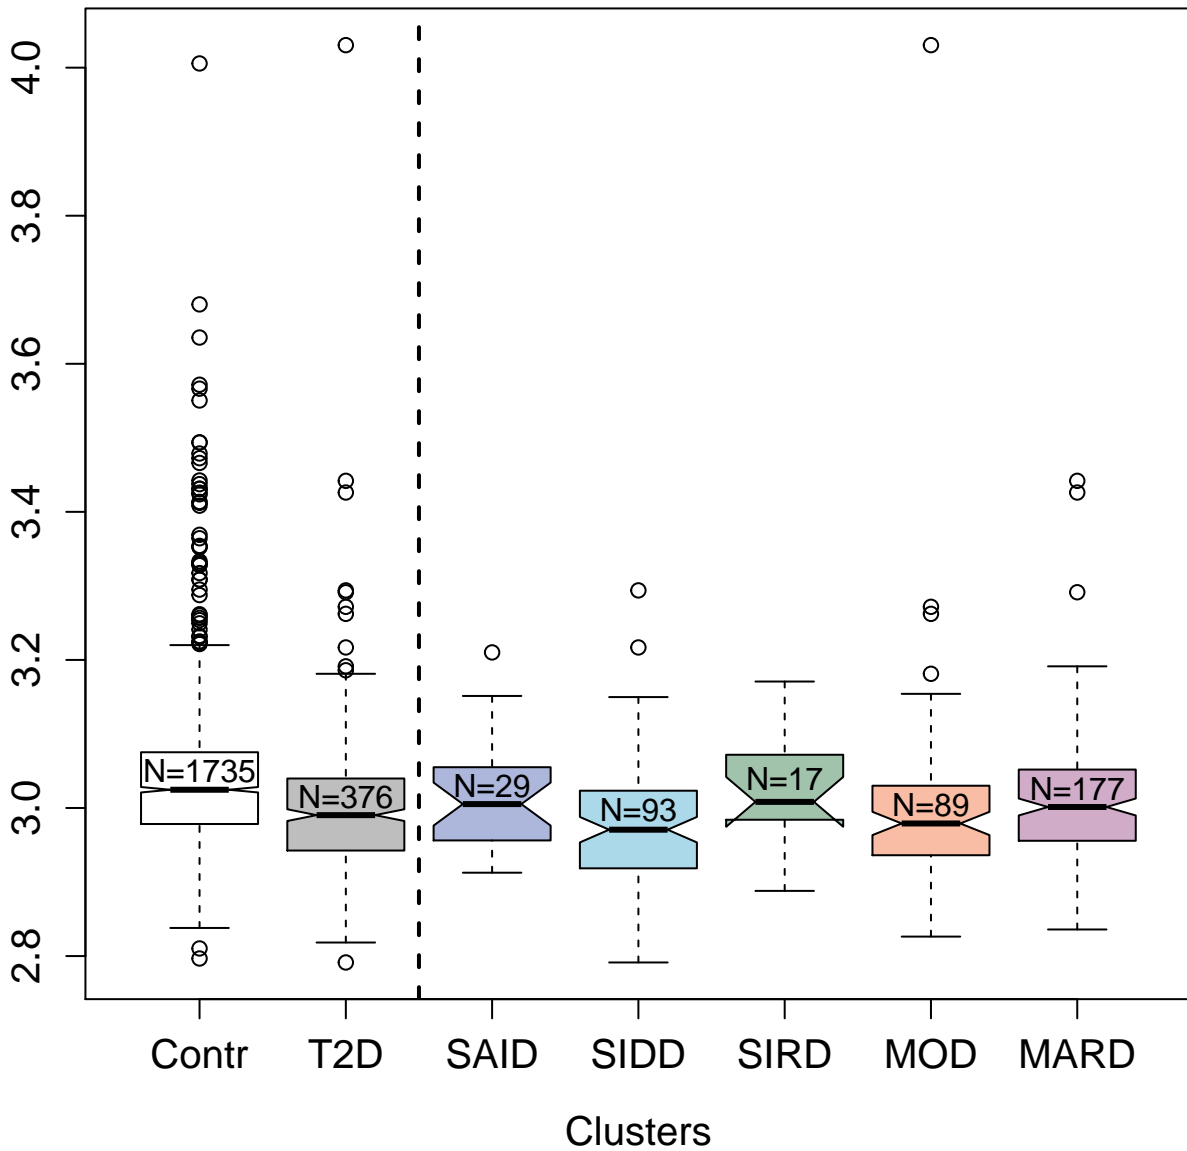

5467-15\_3 : Heat shock protein HSP 90-beta

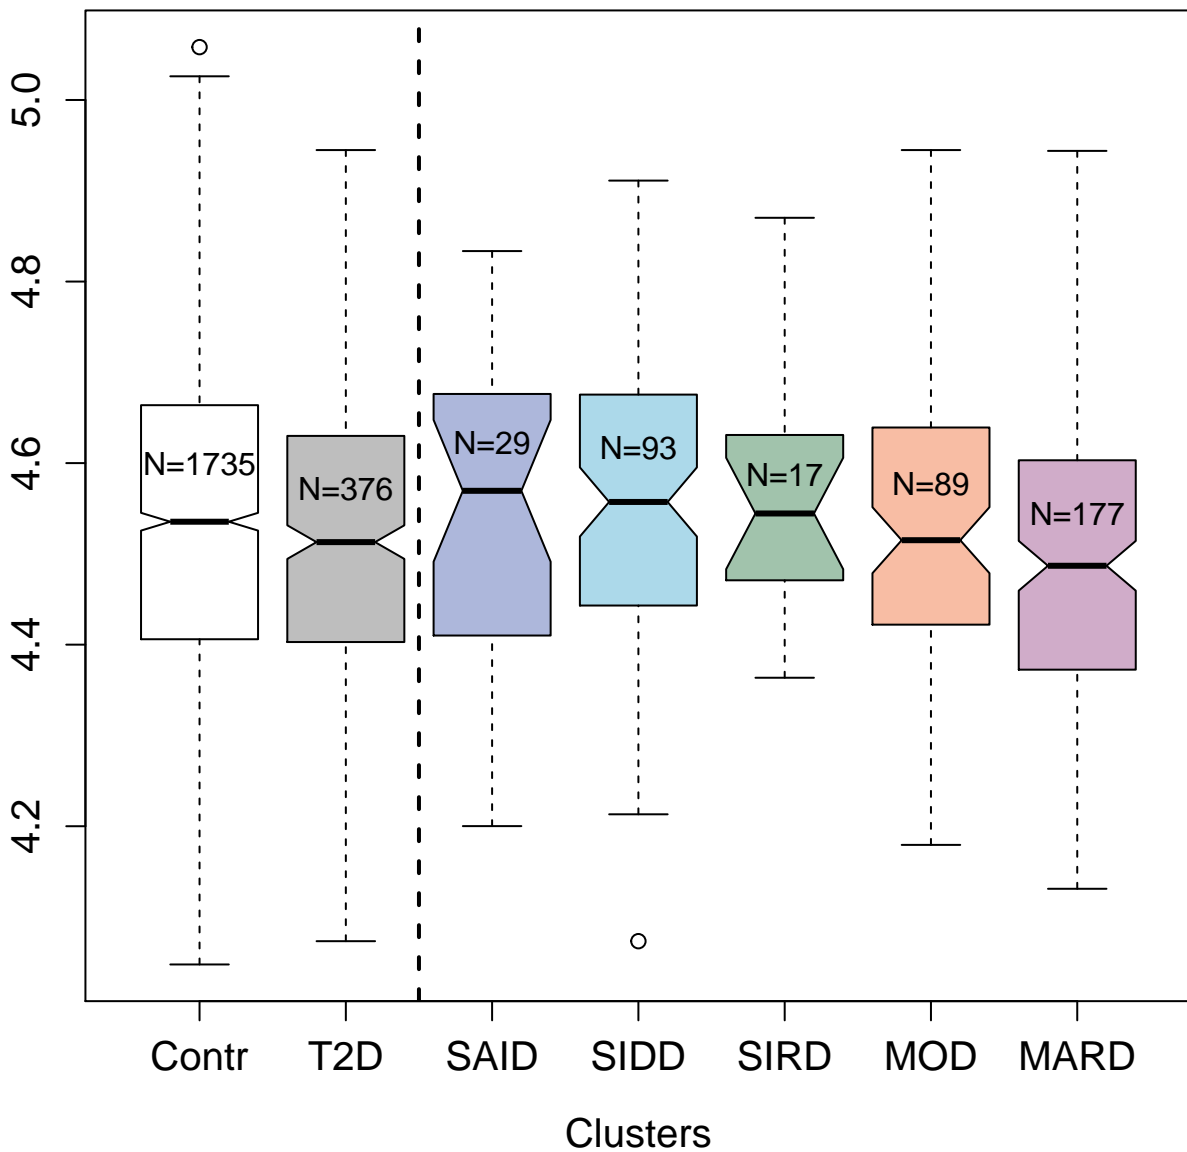

4249-64\_2 : Nucleoside diphosphate kinase B

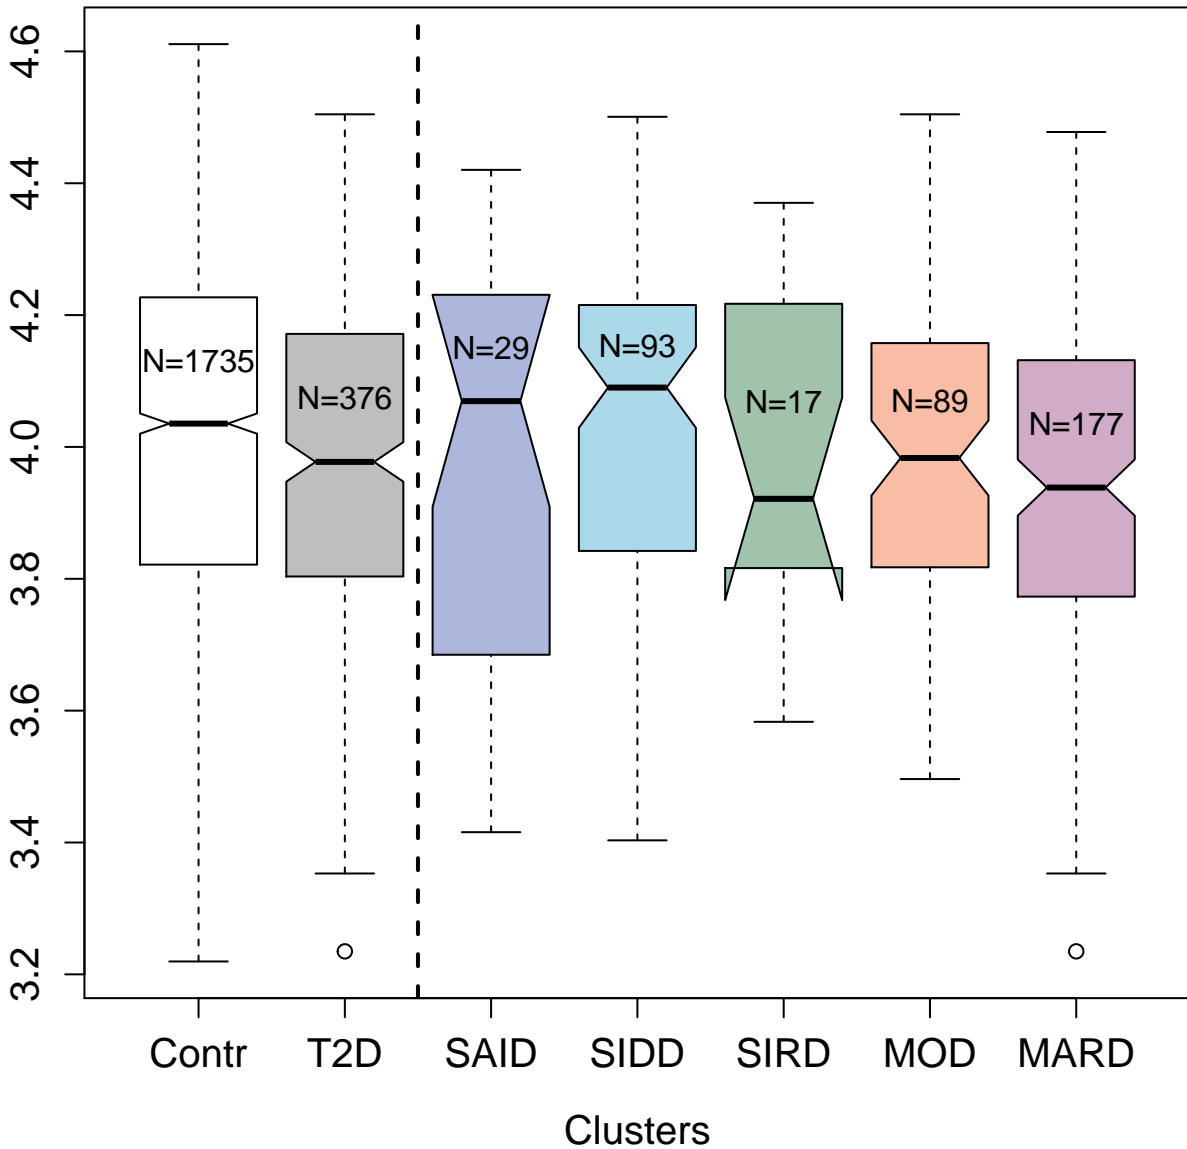

9207-60\_3 : Quinone oxidoreductase-like protein 1

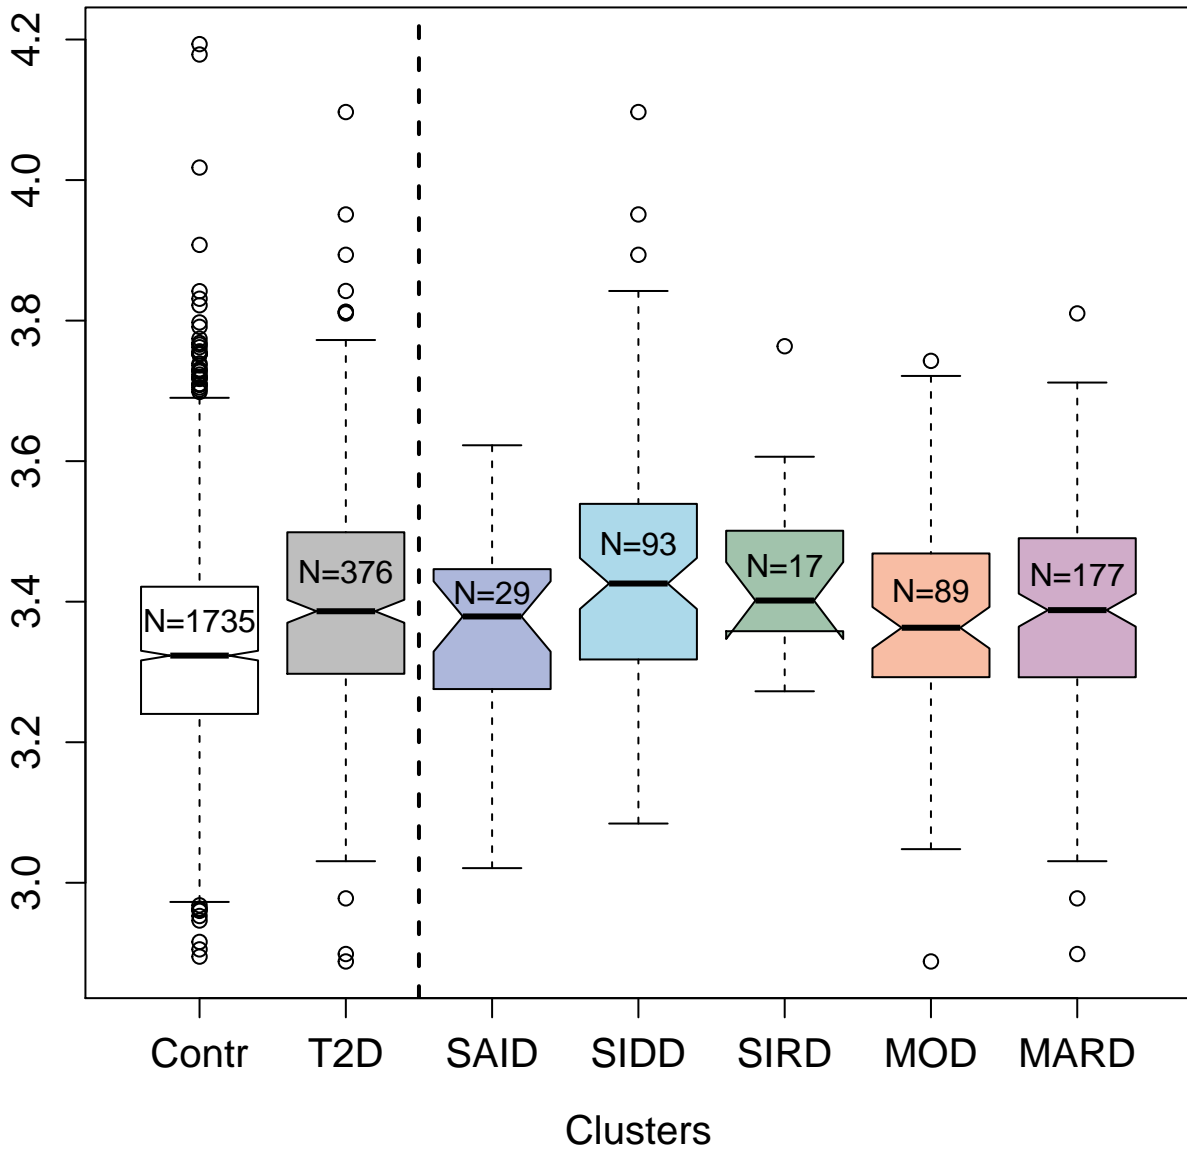

2625-53\_4 : Heat shock protein HSP 90-alpha/beta

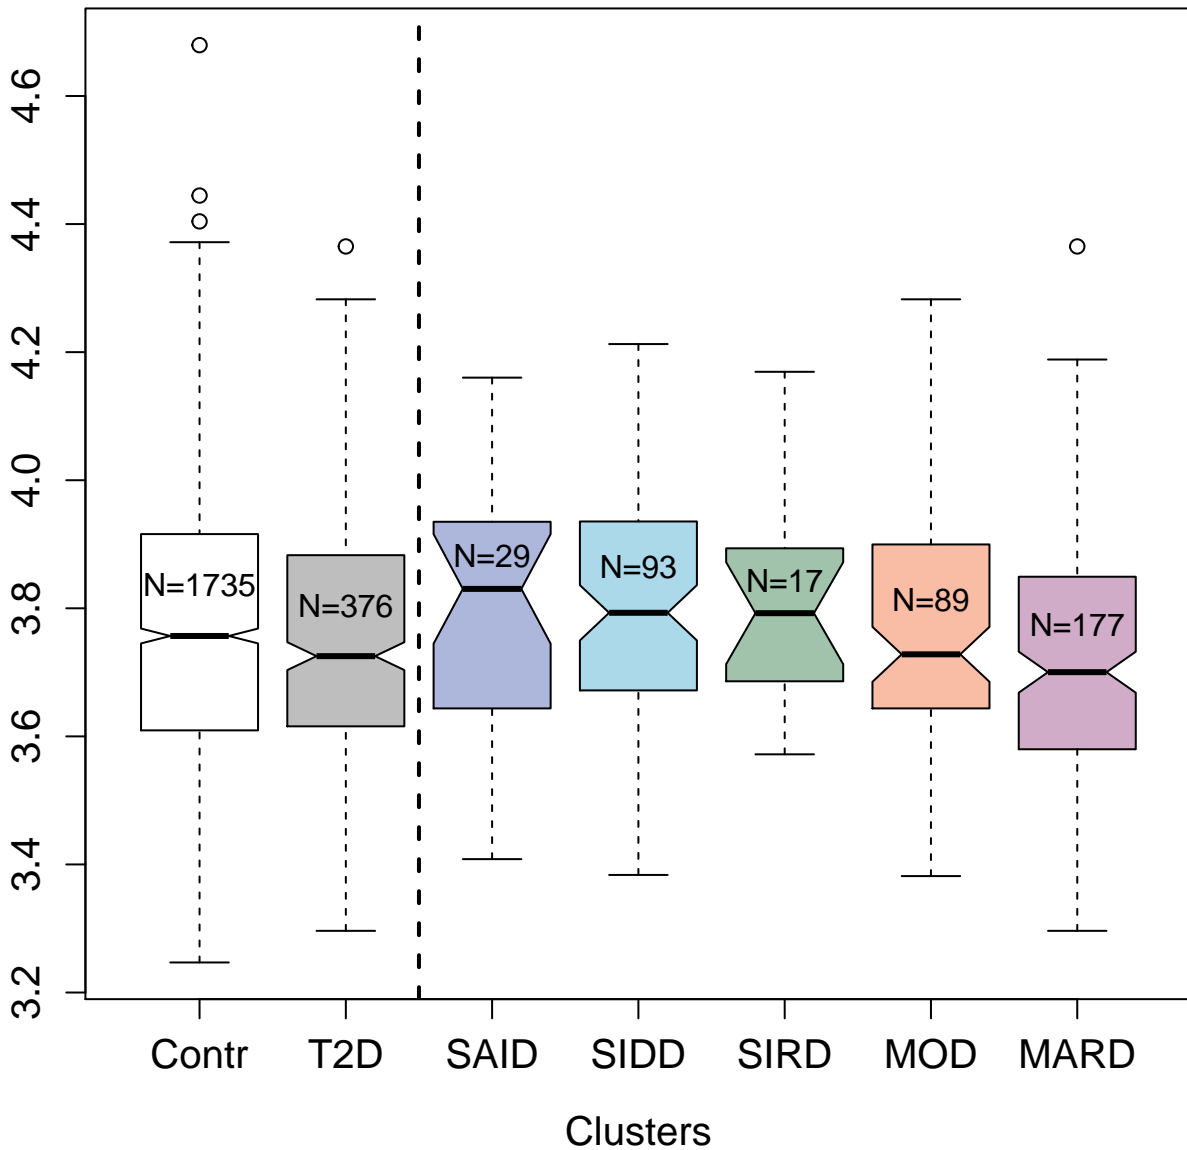

2744-57\_2 : Immunoglobulin G

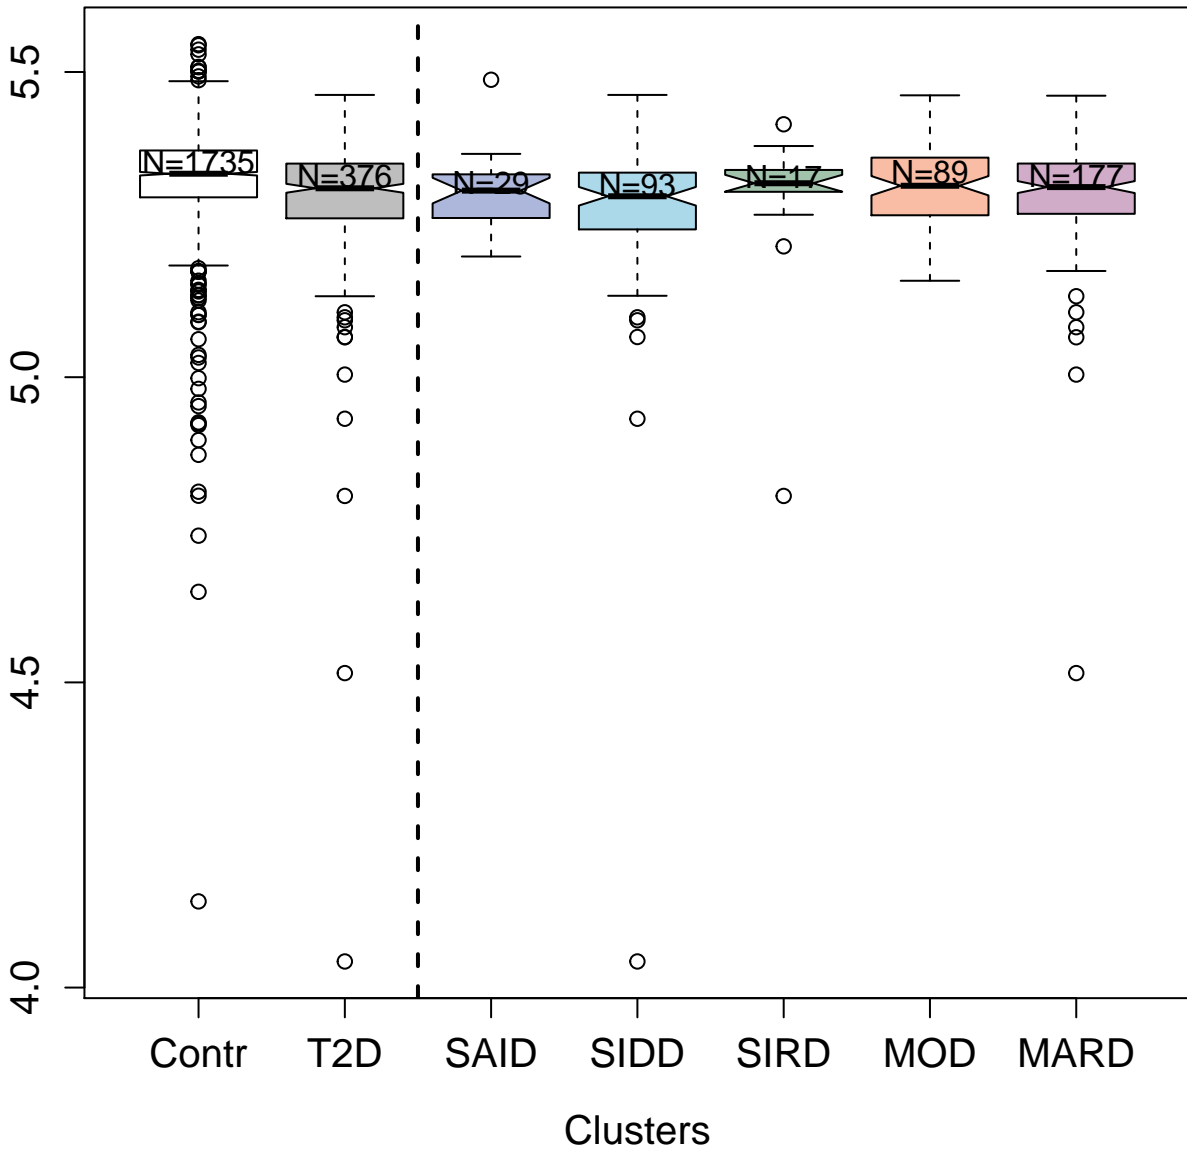

2742-68\_2 : Sialic acid-binding Ig-like lectin 7

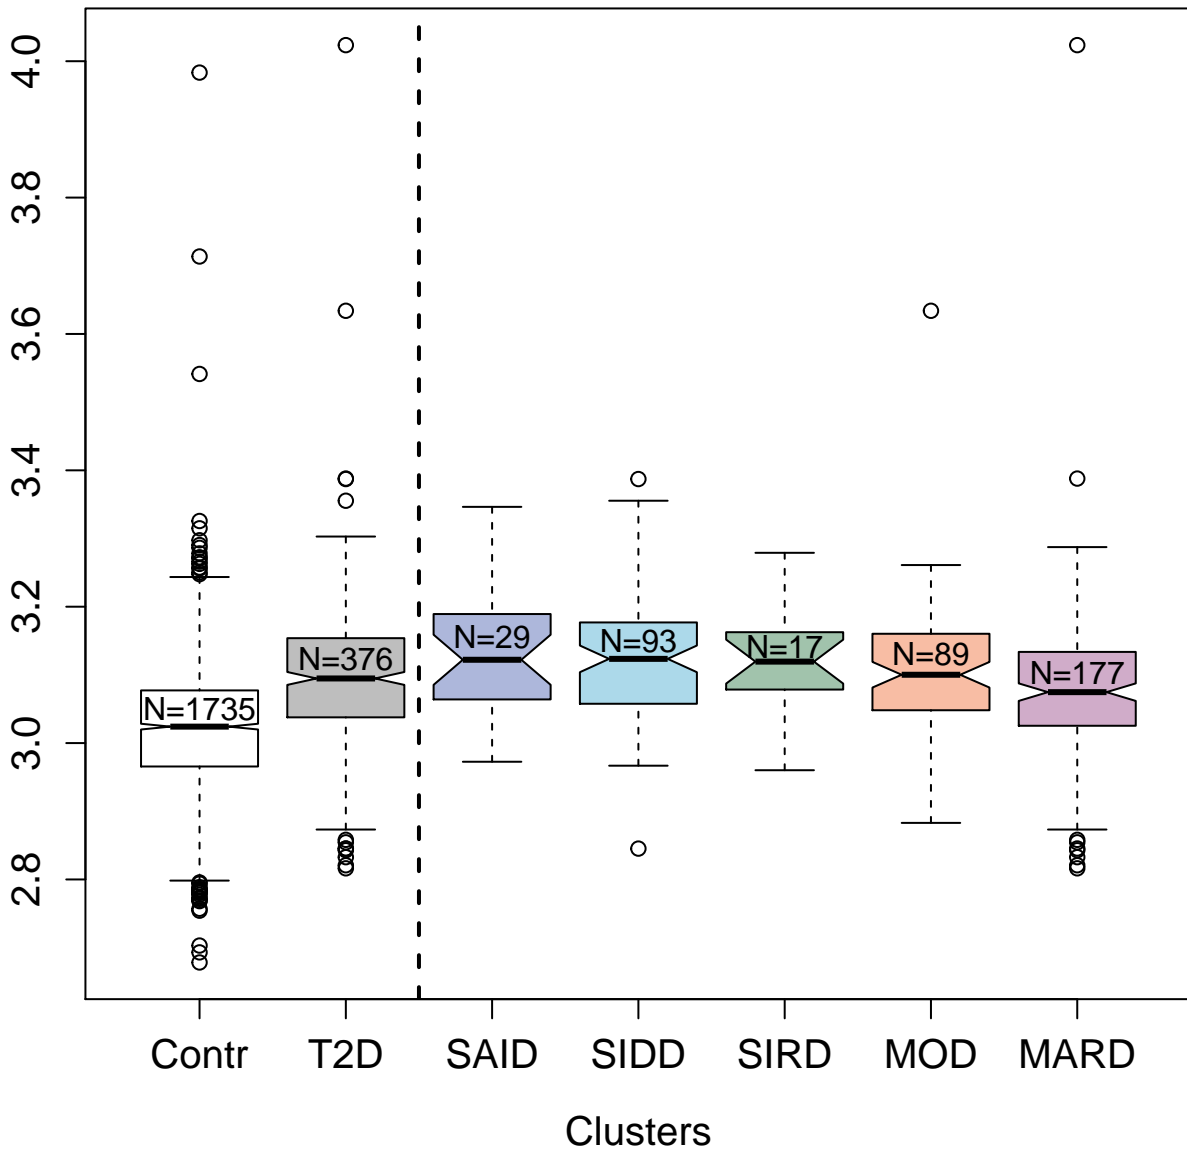

14139-16\_3 : Neuregulin-4

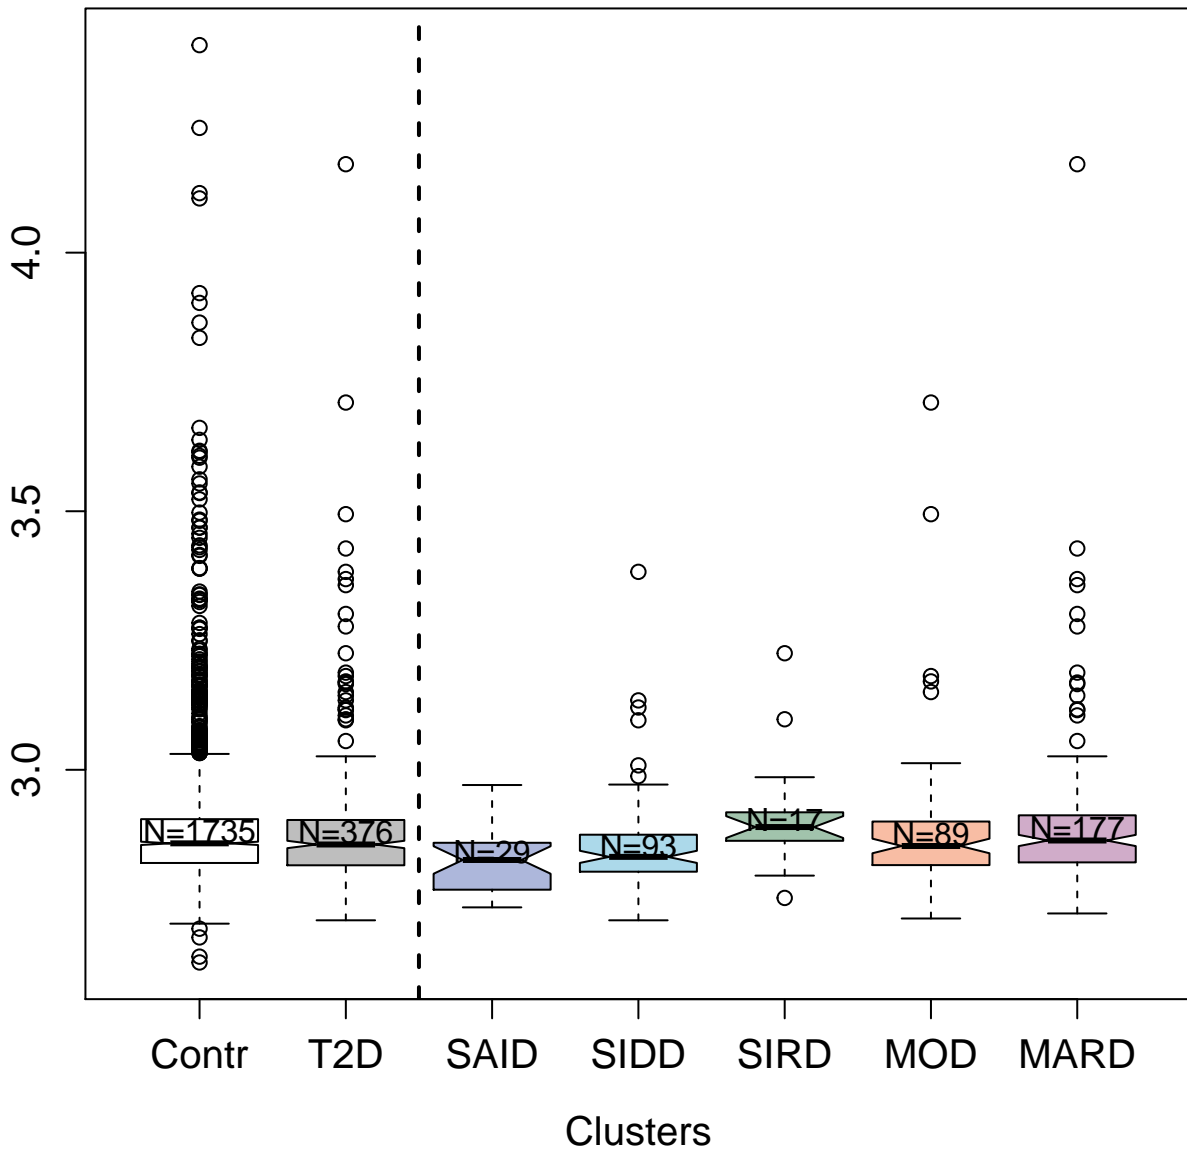



2878-66\_2 : Tyrosine-protein kinase Yes

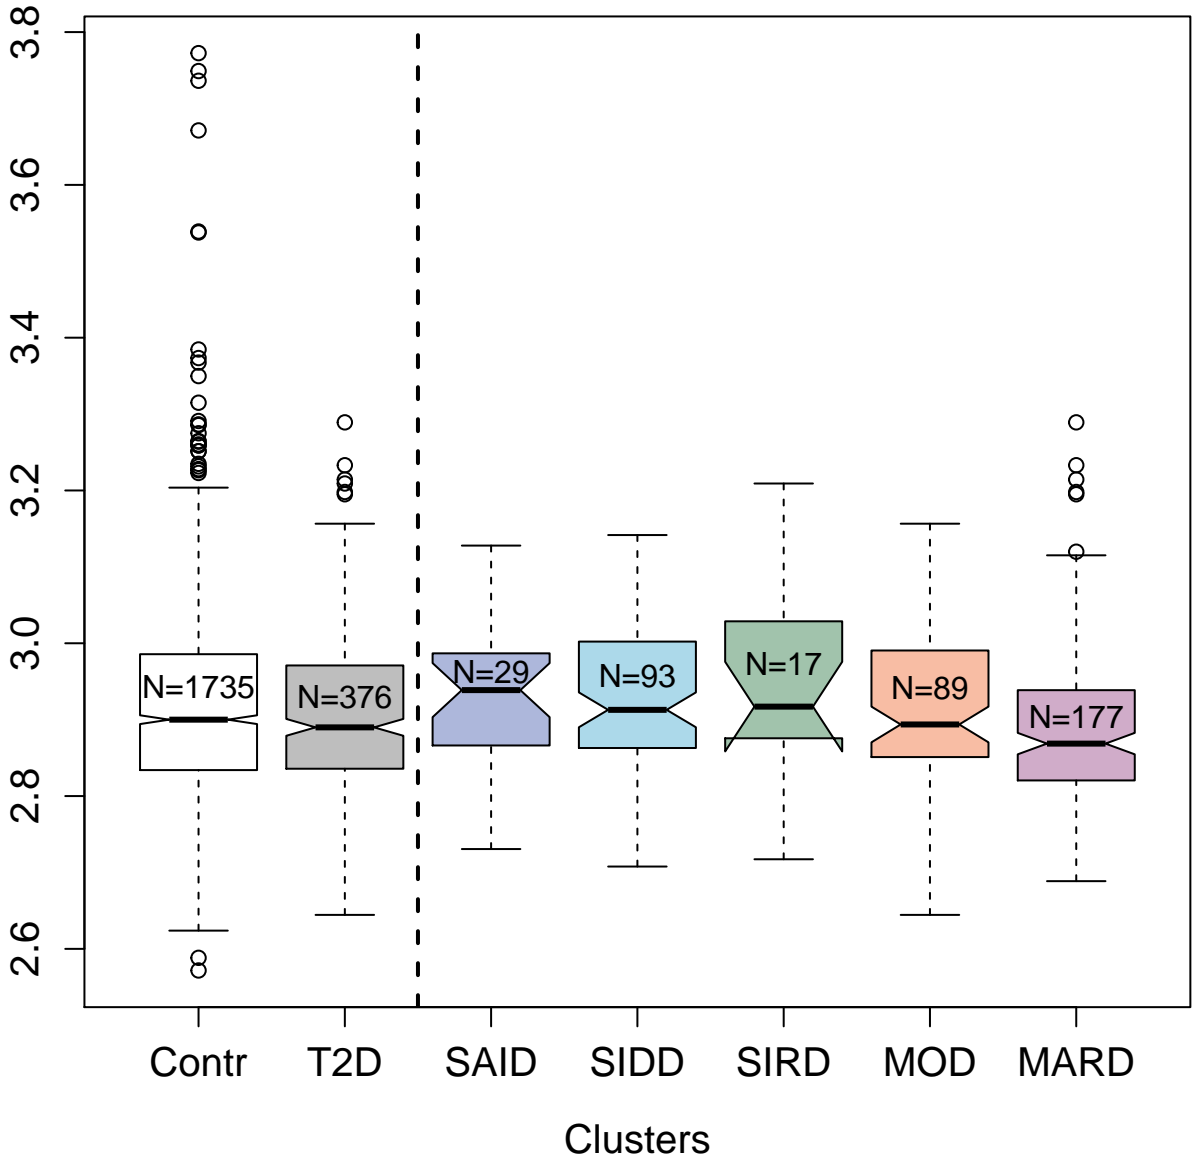

4963-19\_1 : cAMP-regulated phosphoprotein 19

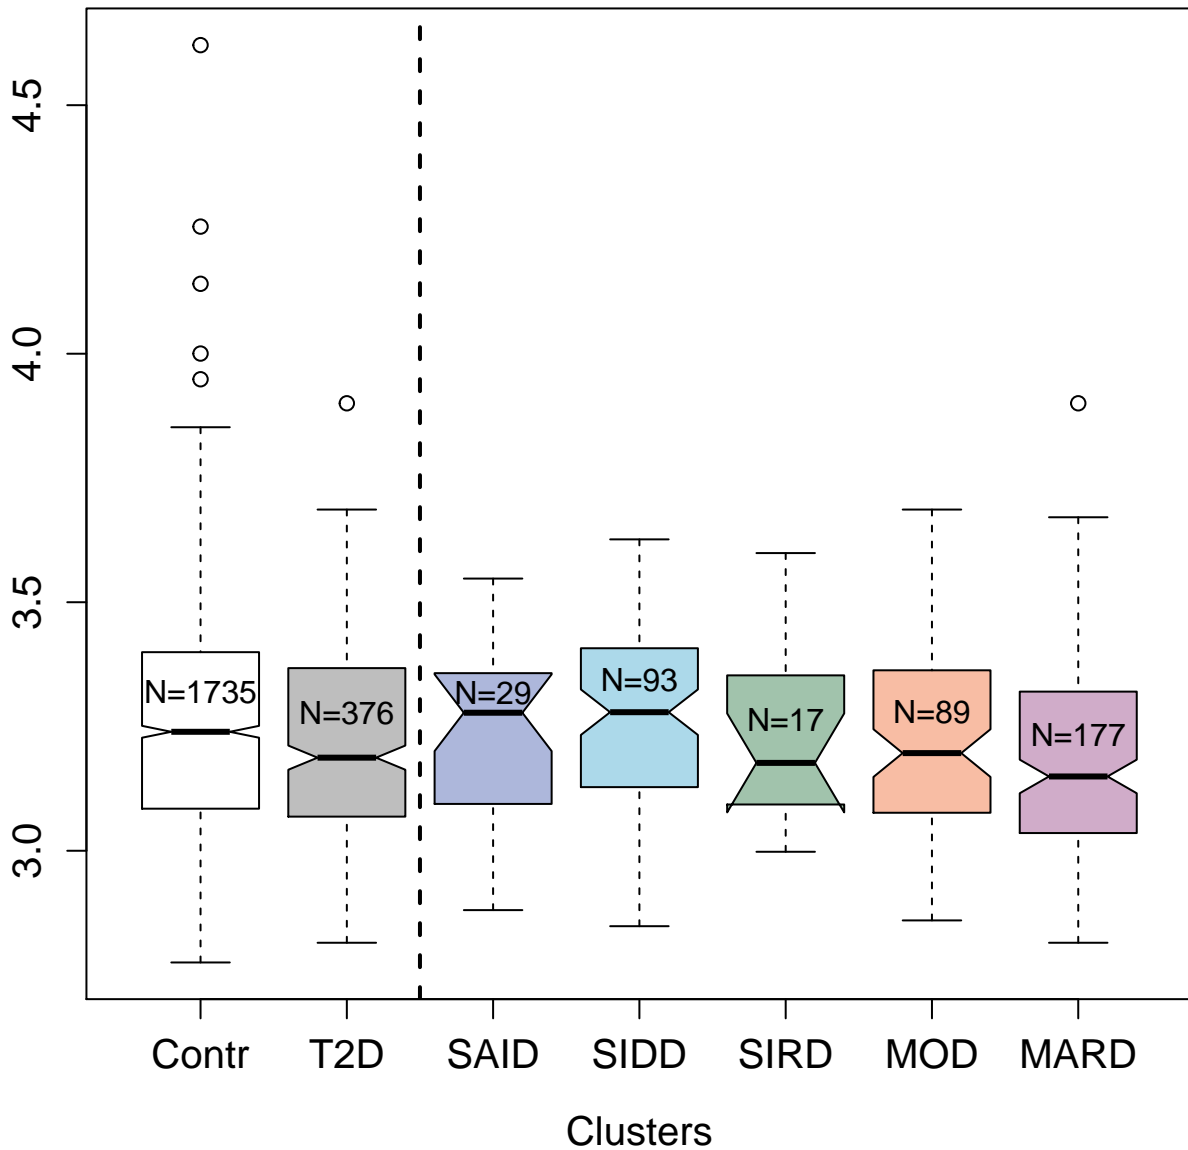

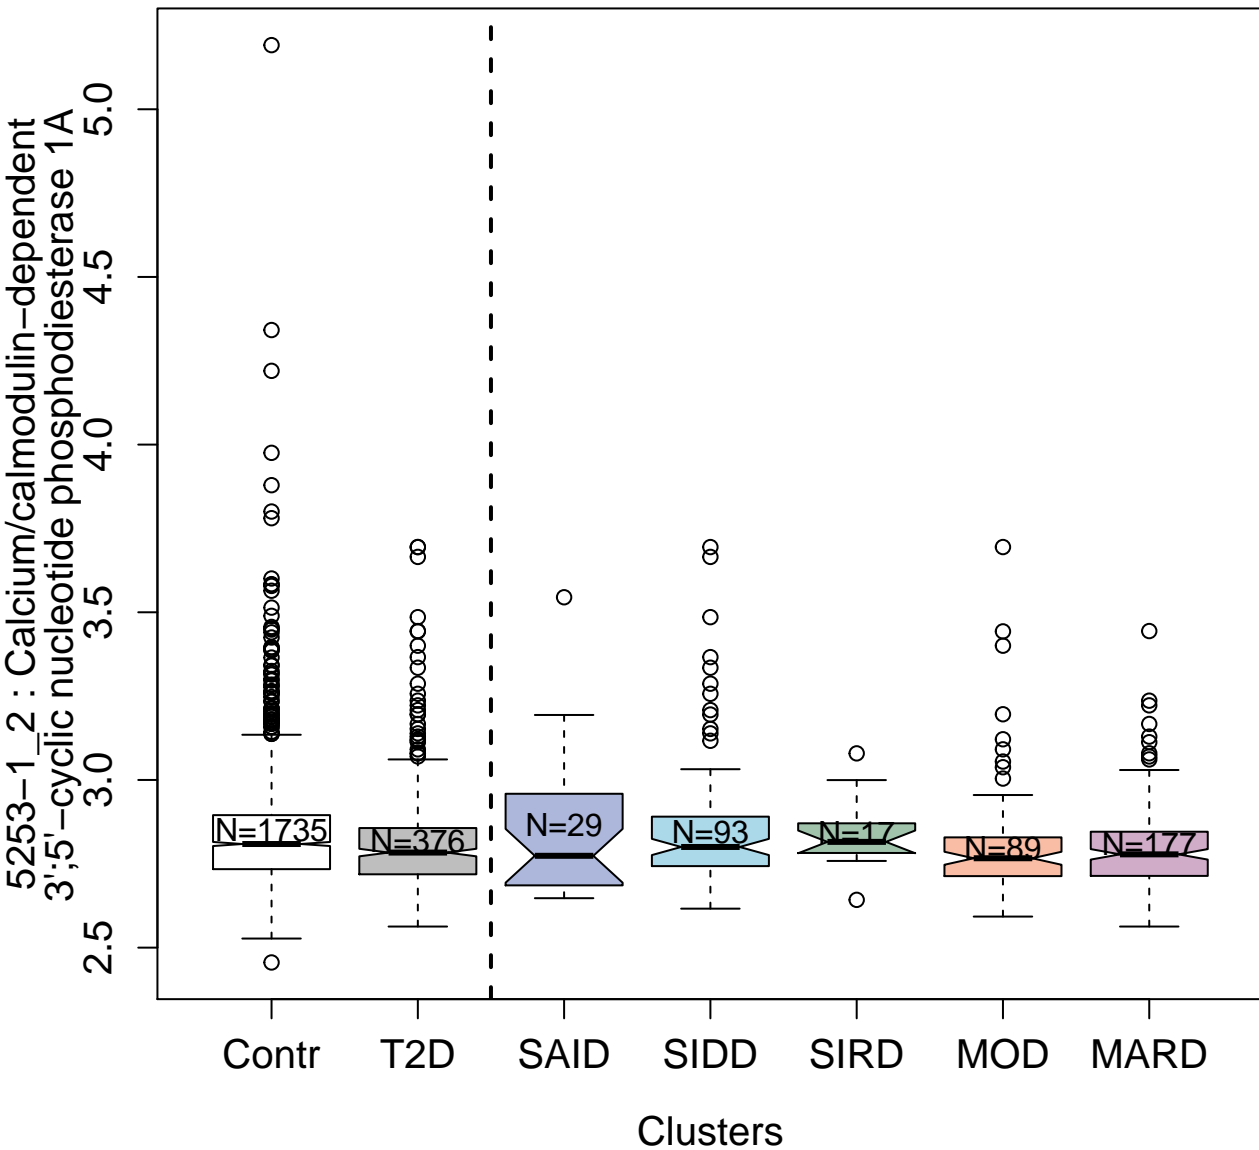

8474-6\_3 : Tyrosine-protein kinase transmembrane receptor ROR1

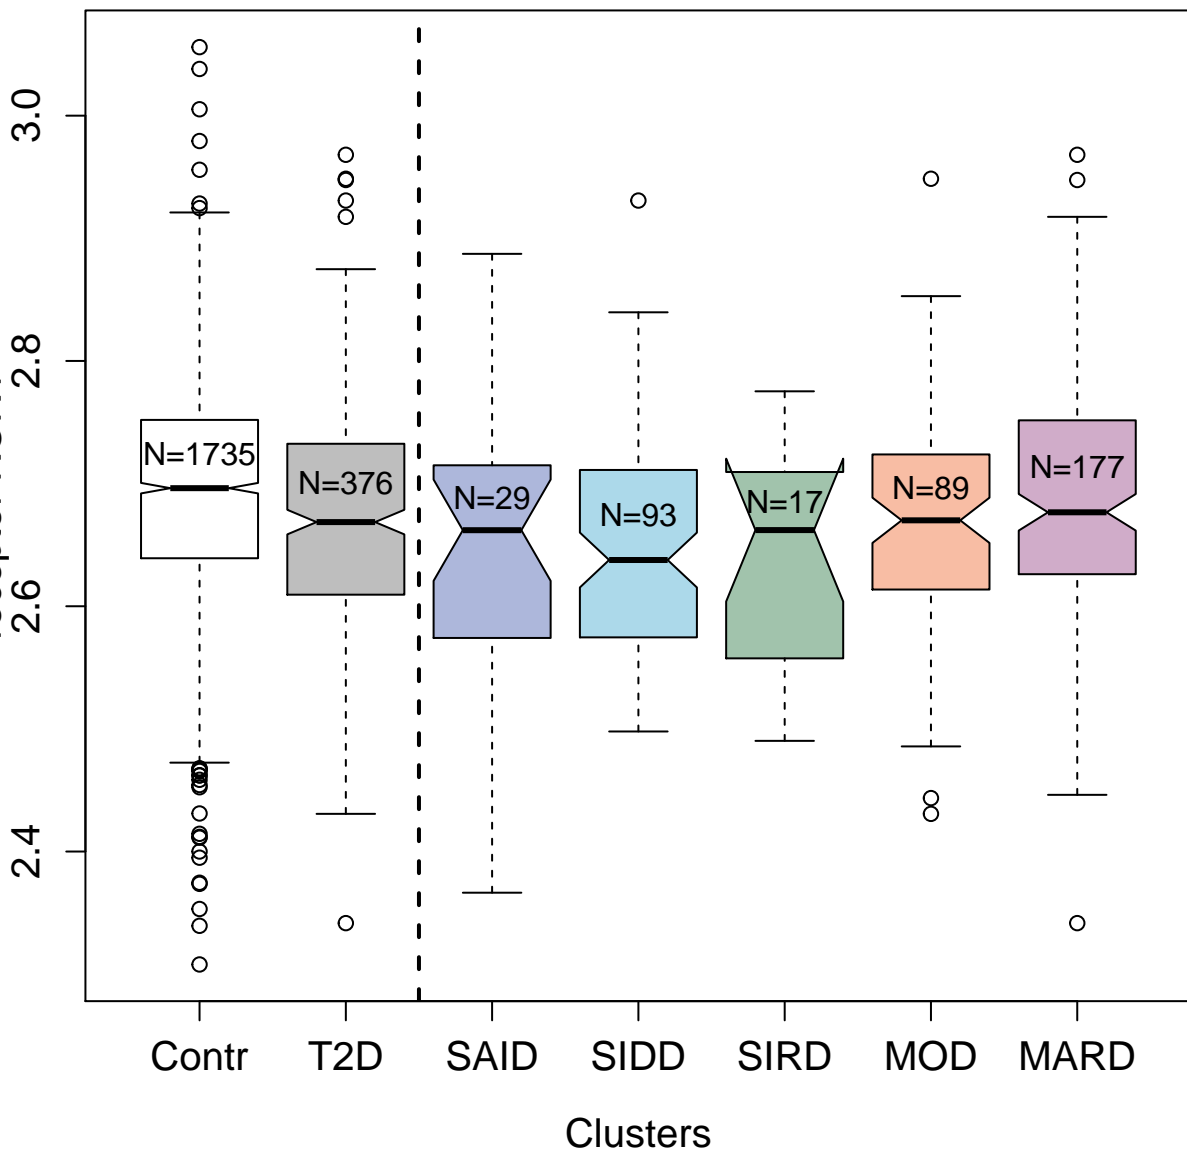

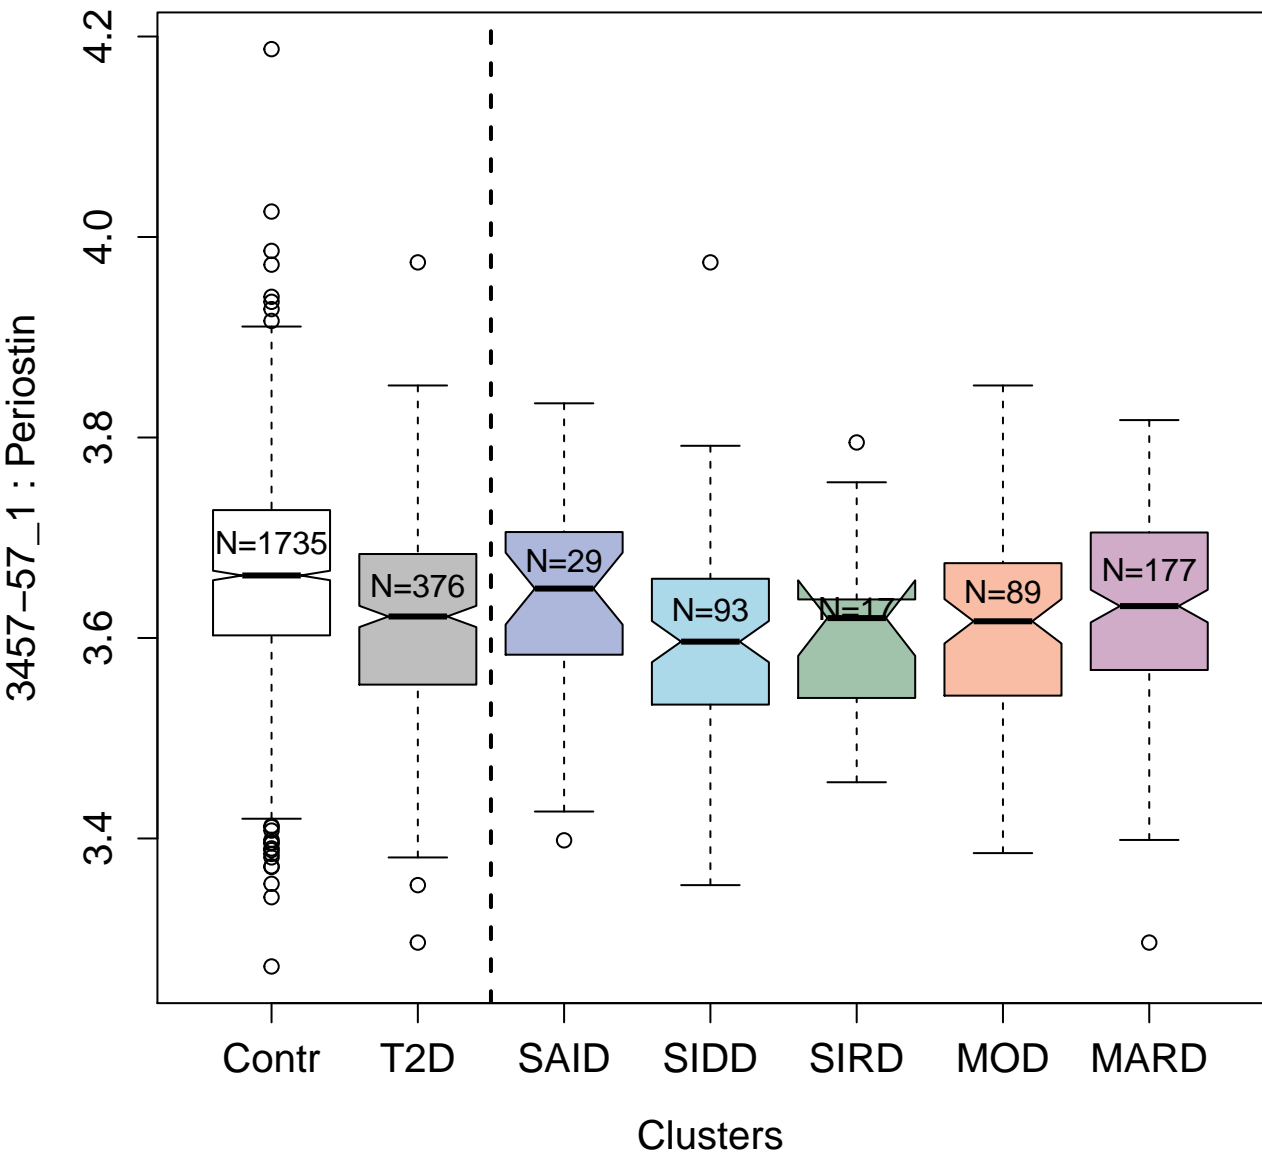

14143-8\_3 : Histone H2B type 2-E

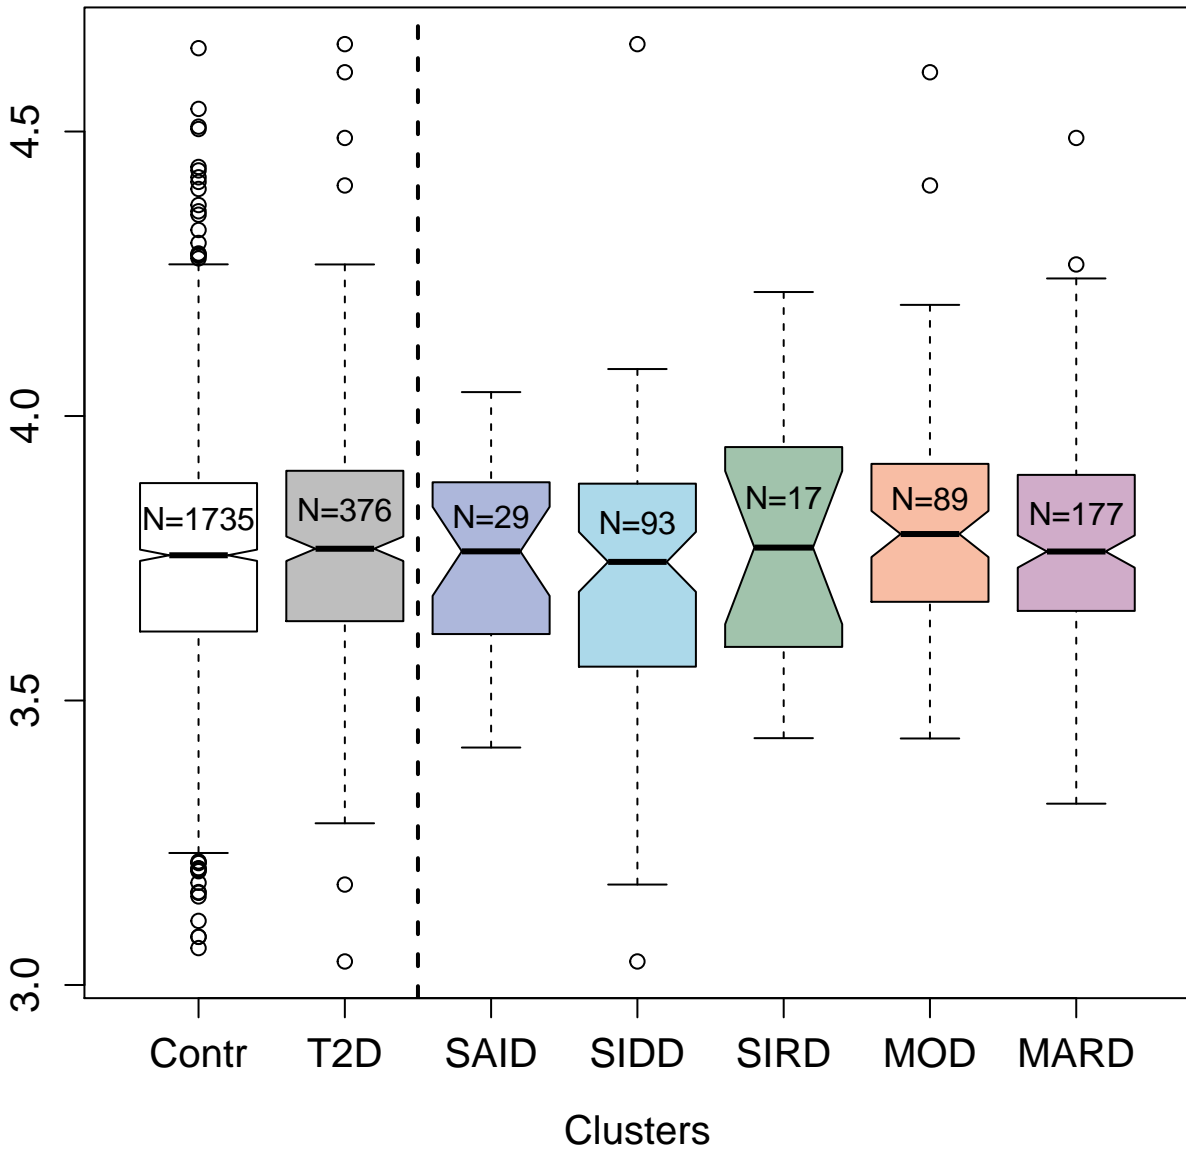

4125-52\_2 : Advanced glycosylation end product-specific receptor; soluble

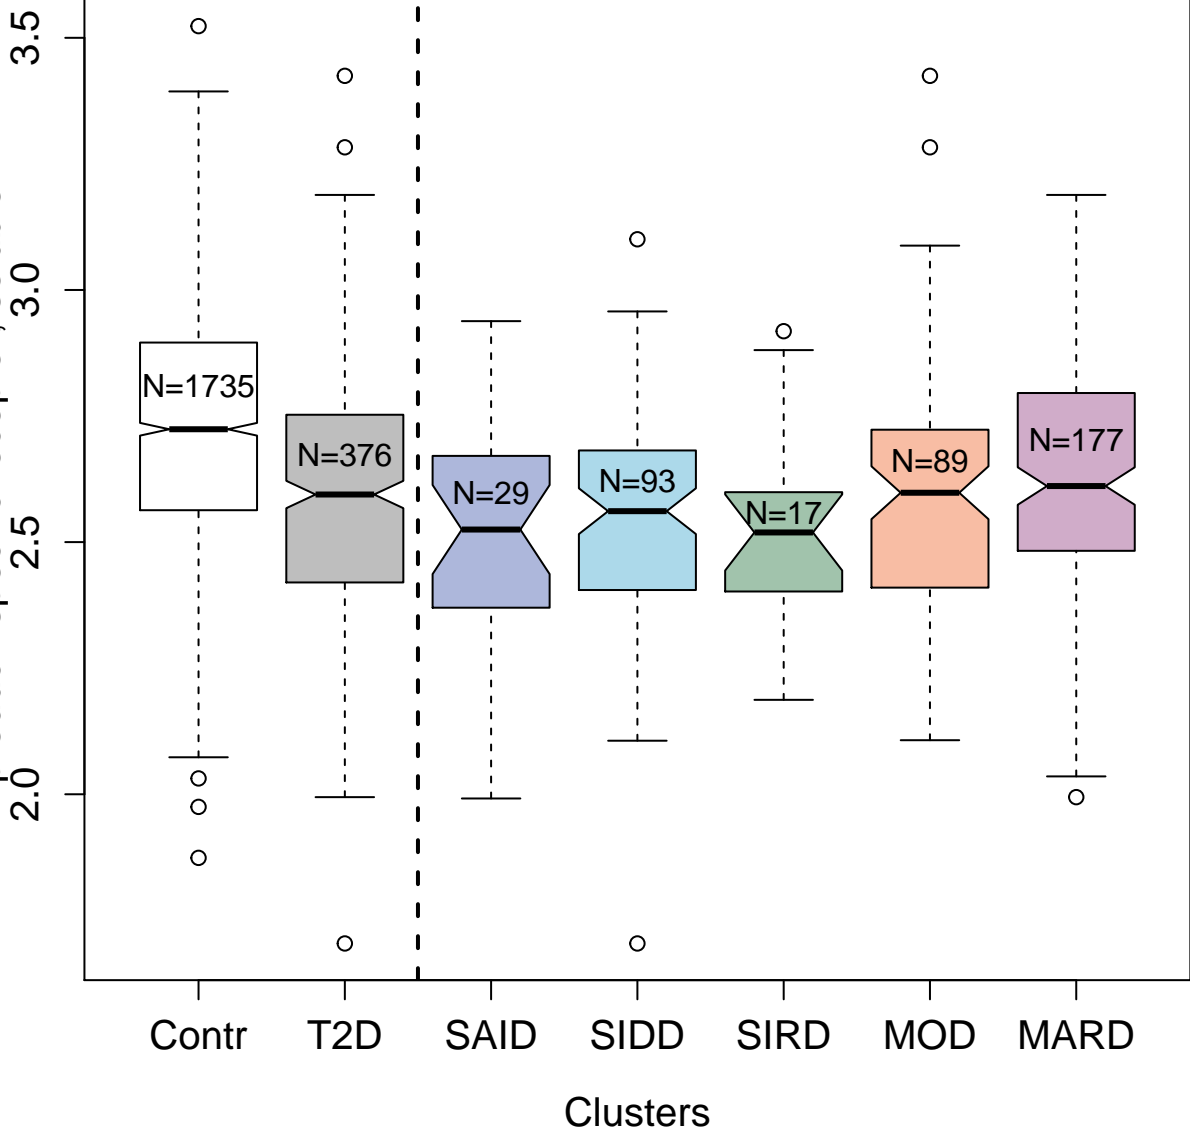

4905-63\_1 : Coactosin-like protein

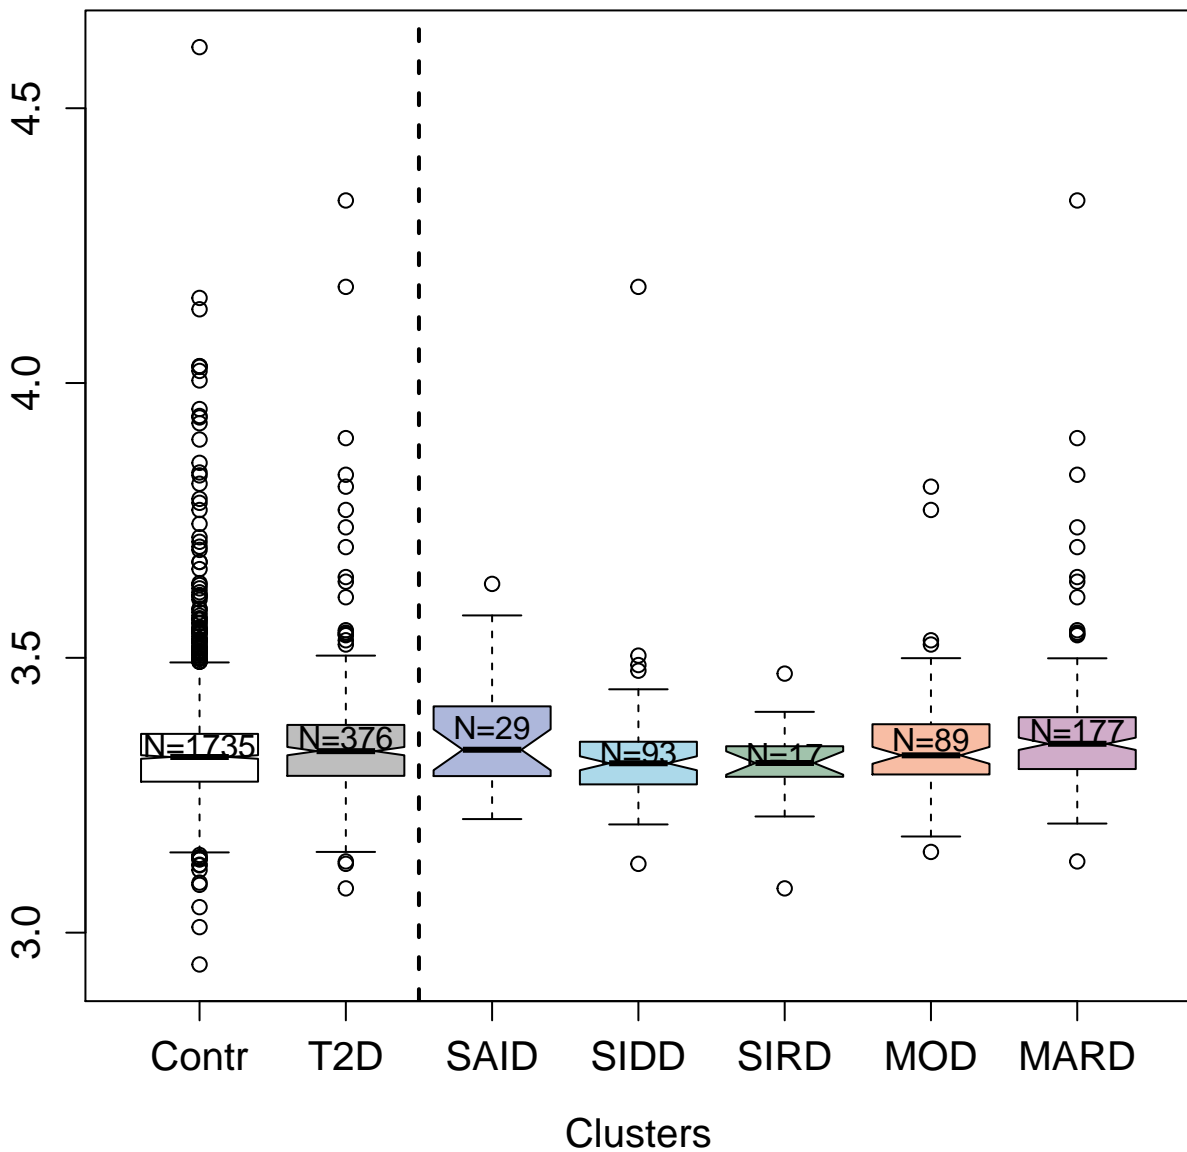



7625-27\_3 : 14-3-3 protein theta

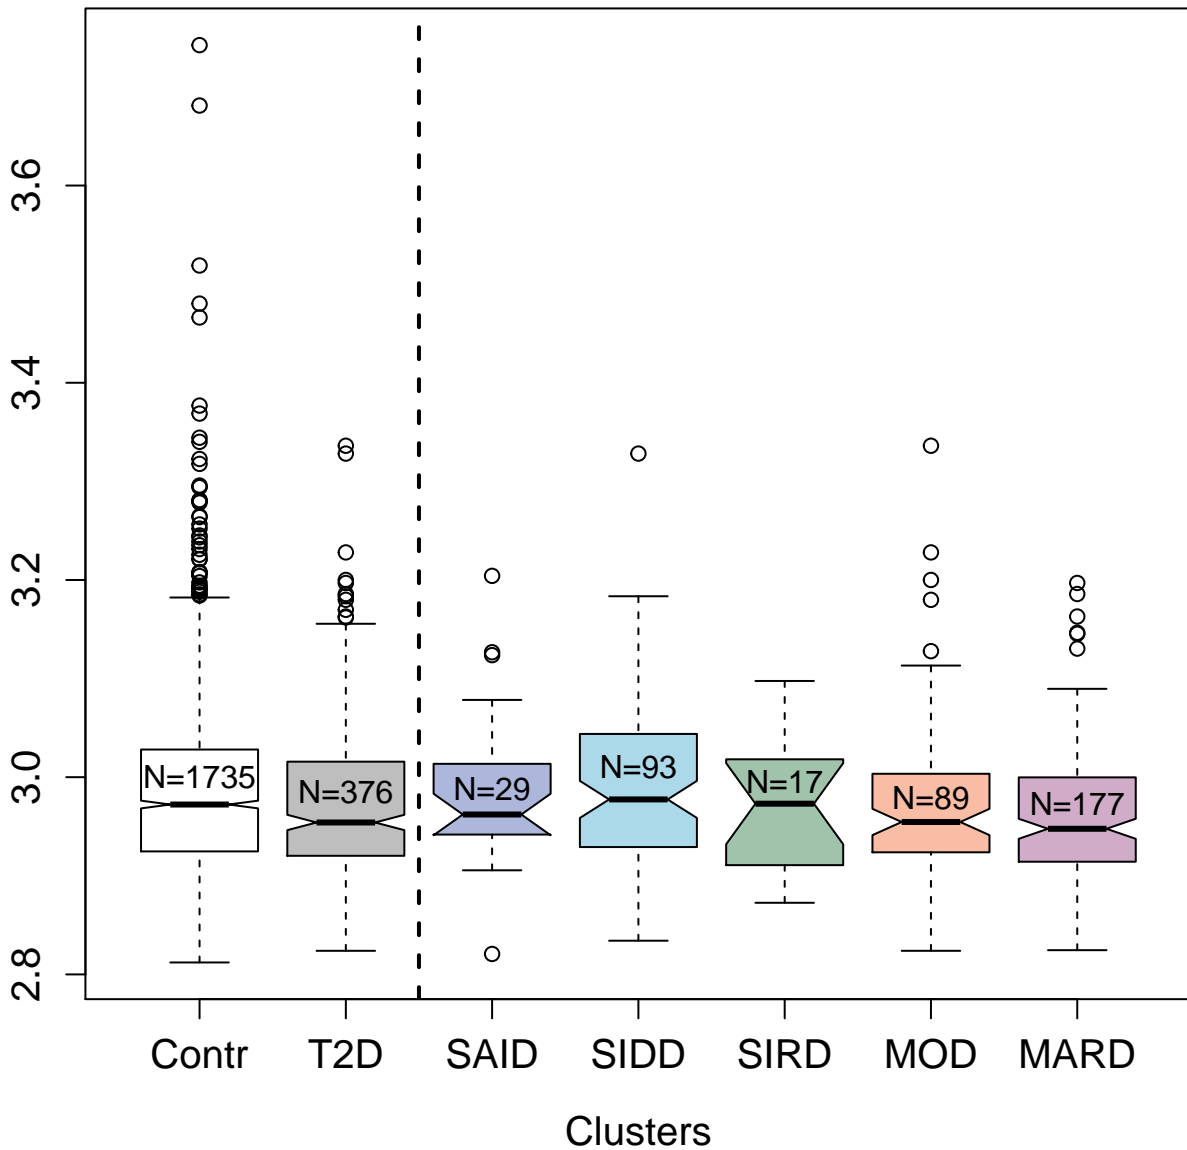

5345-51\_3 : Cytoskeleton-associated protein 2

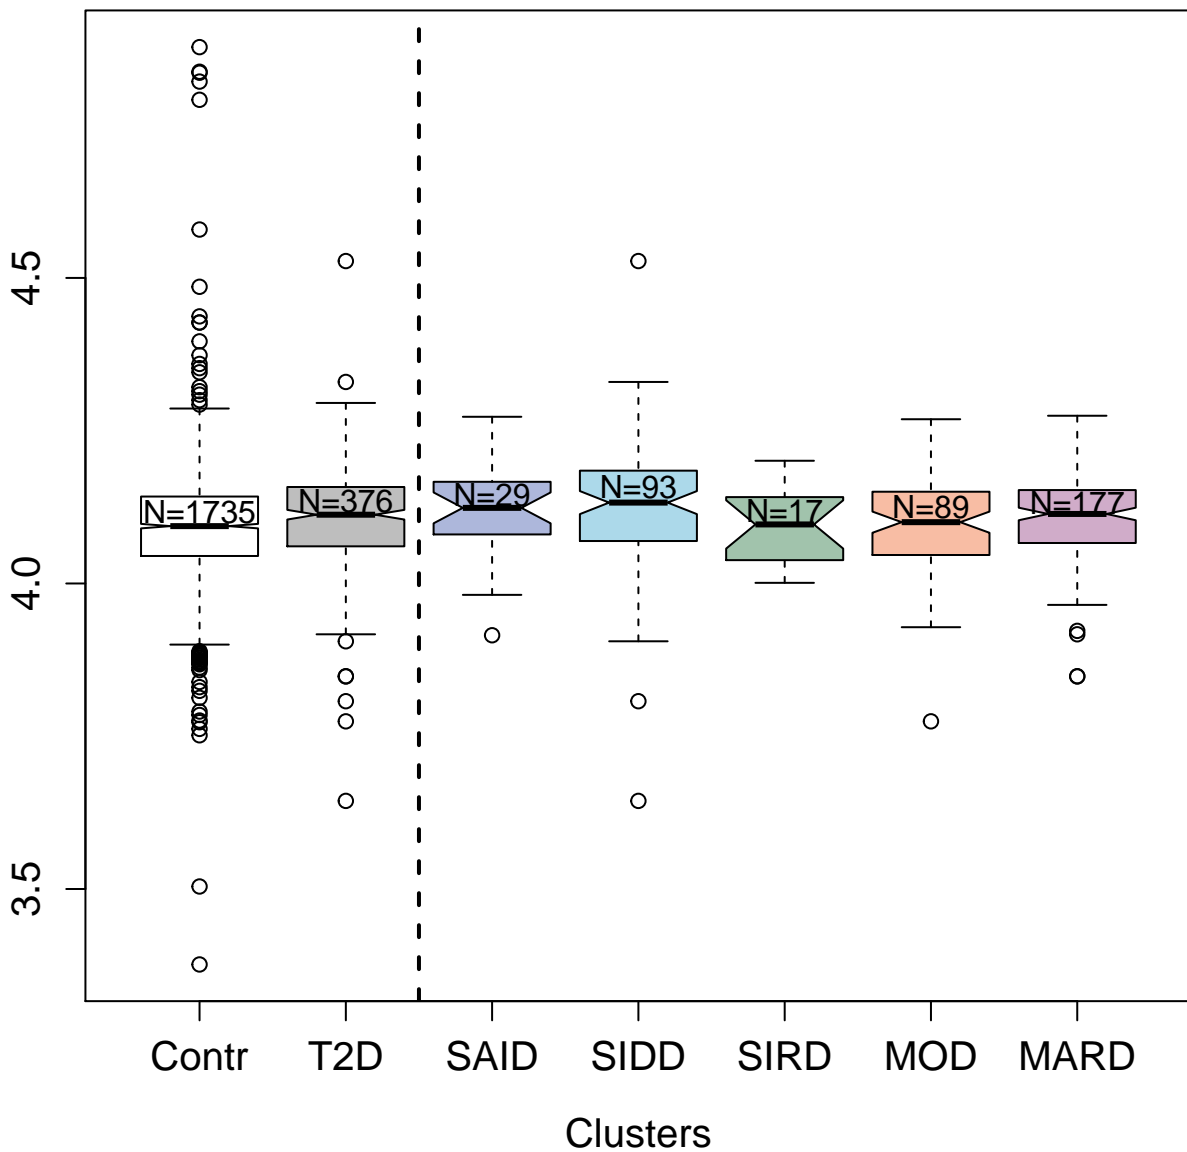

5019-16\_2 : Ubiquitin carboxyl-terminal hydrolase isozyme L1

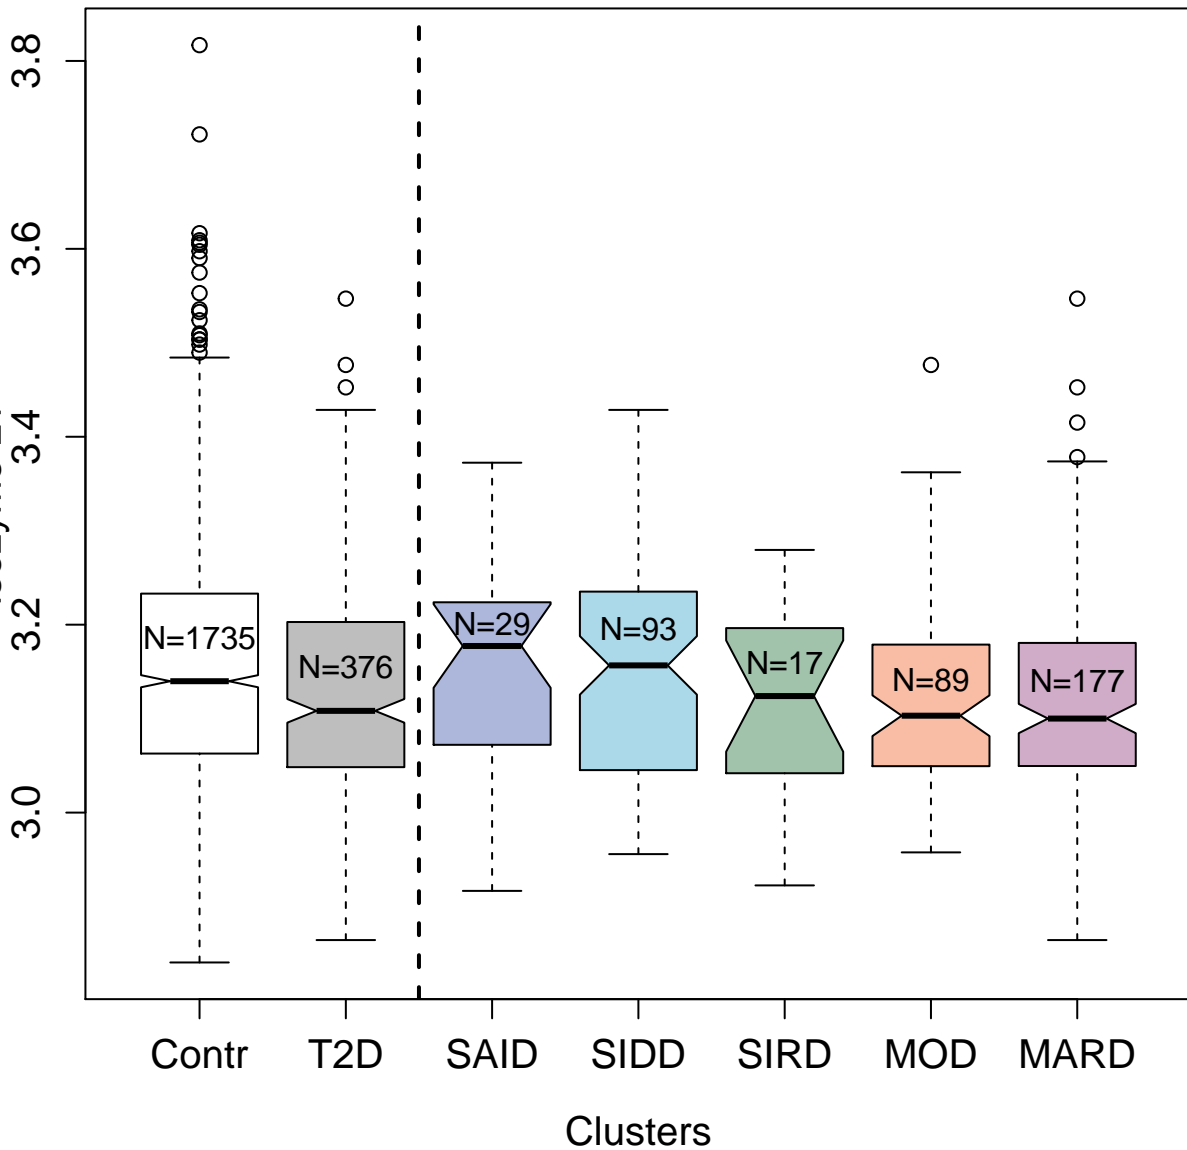

5470-69\_2 : Mediator of RNA polymerase II  
transcription subunit 1

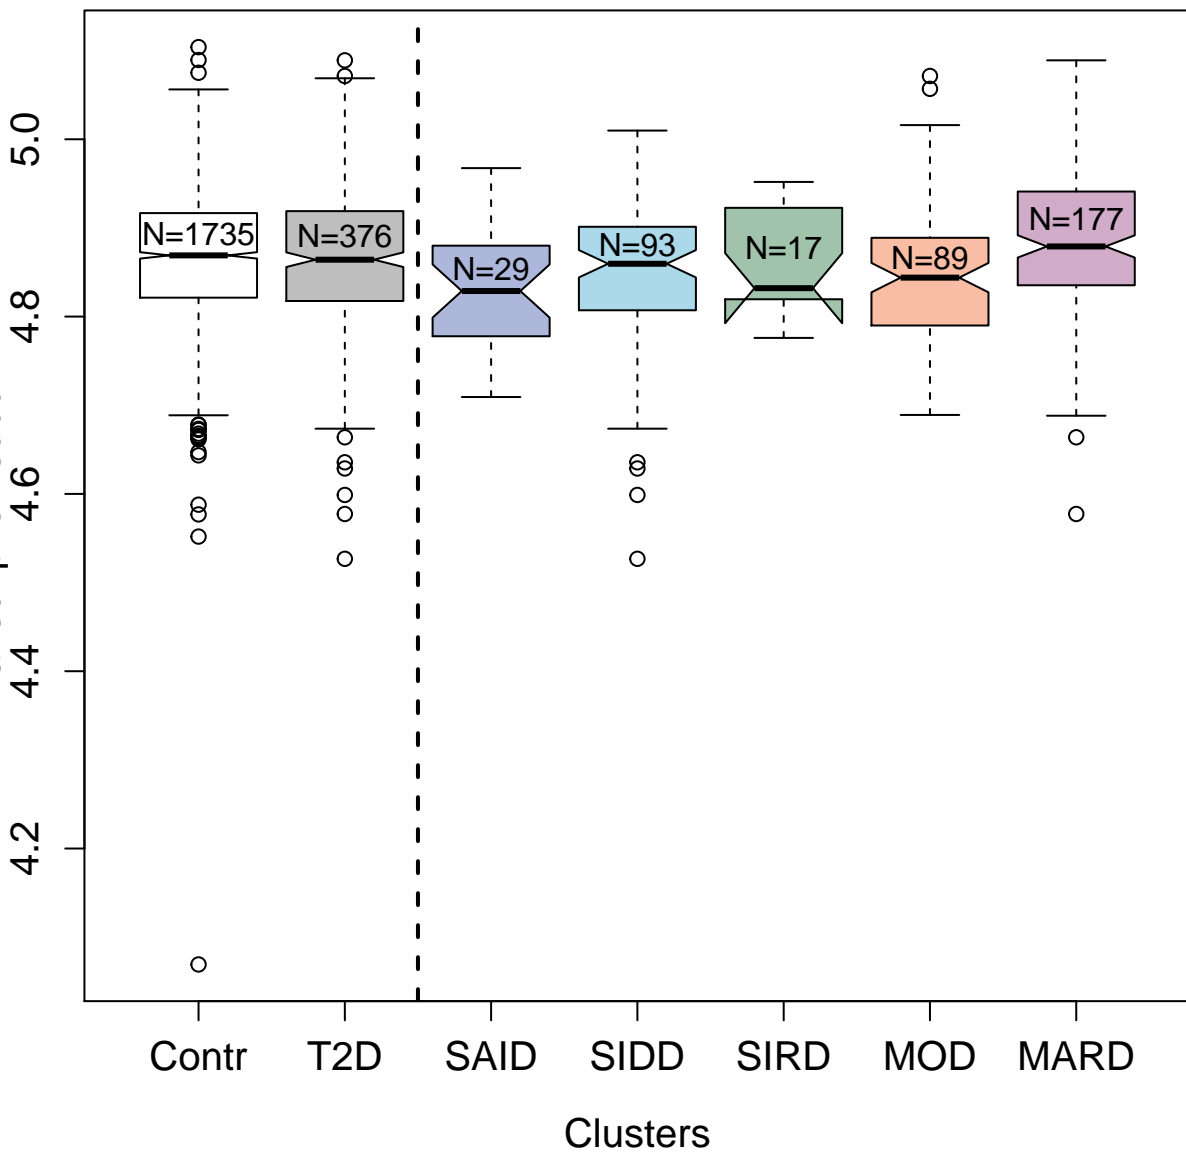

13093-6\_3 : Secreted and transmembrane protein 1

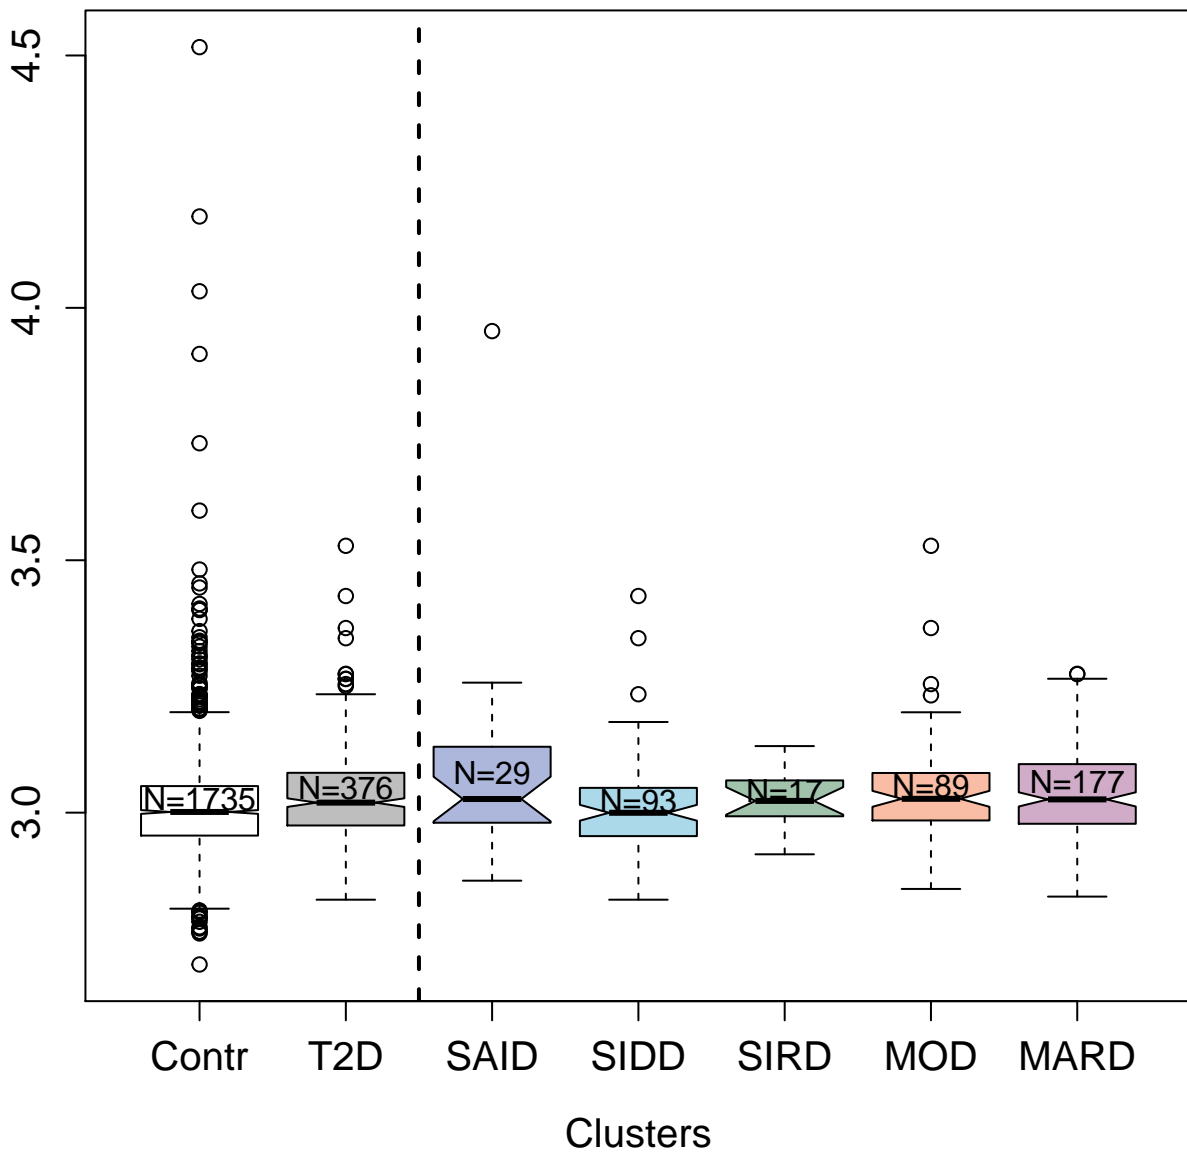

4840-73\_1 : Granulocyte colony-stimulating factor

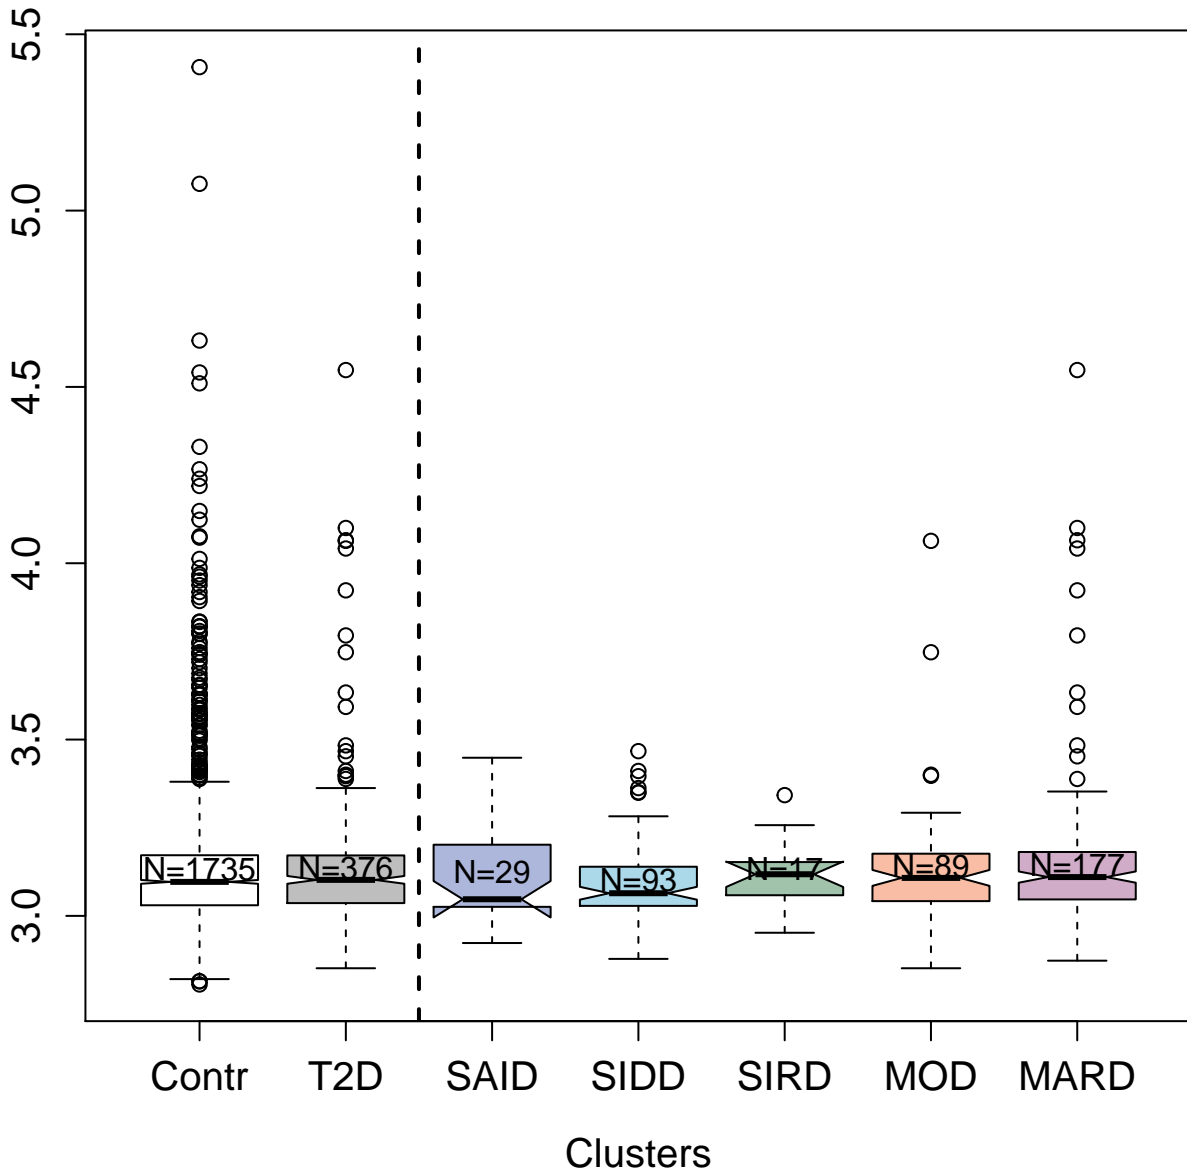

14131-37\_3 : Ephrin-B2

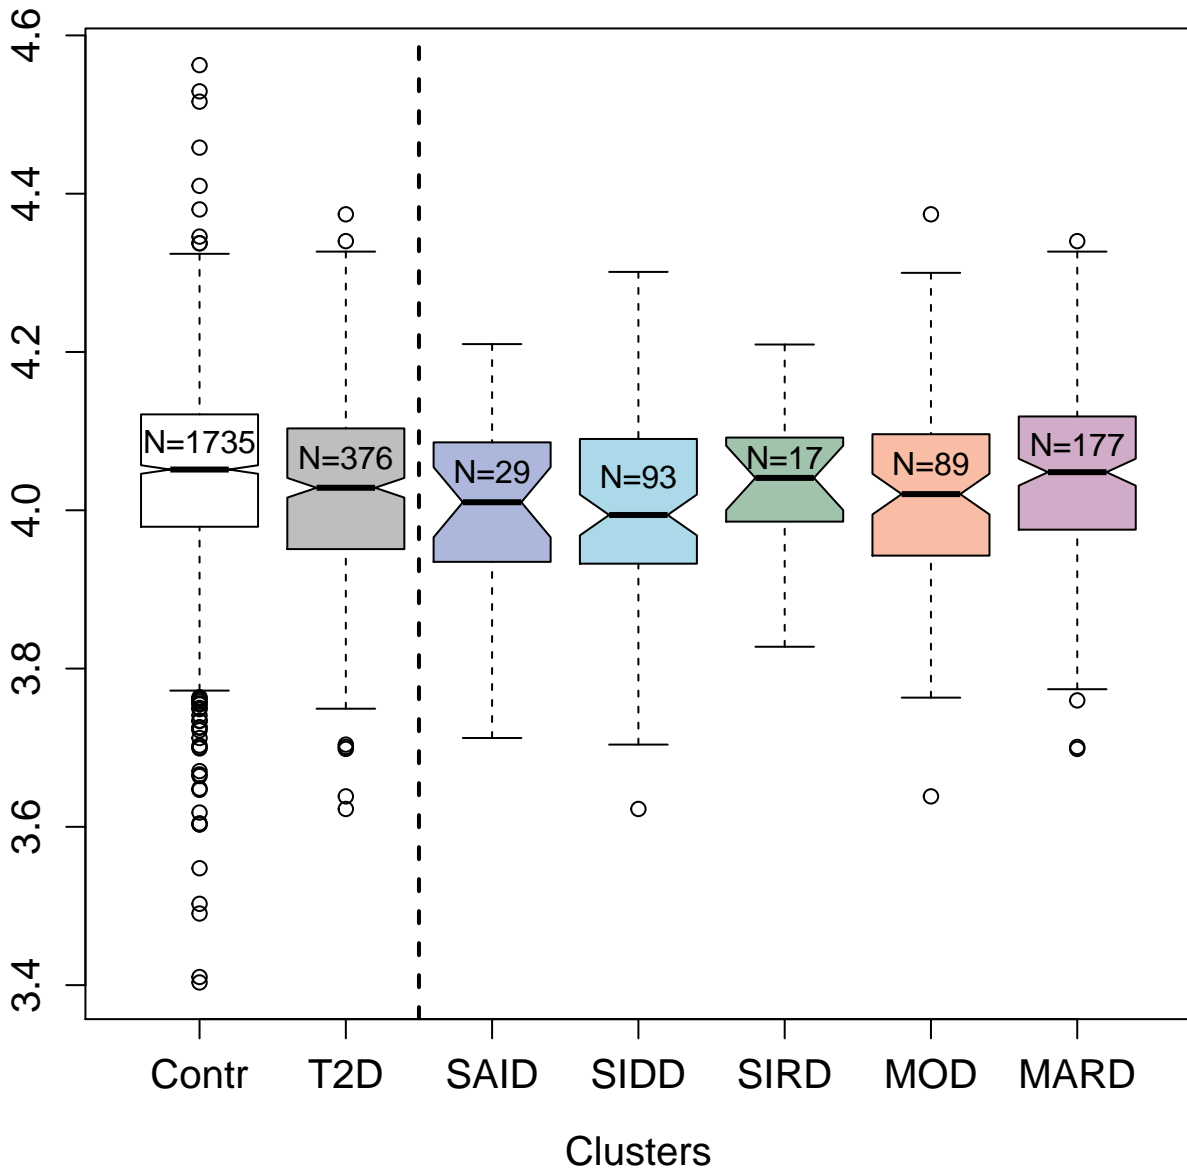

3503-4\_2 : Integrin alpha-I: beta-1 complex

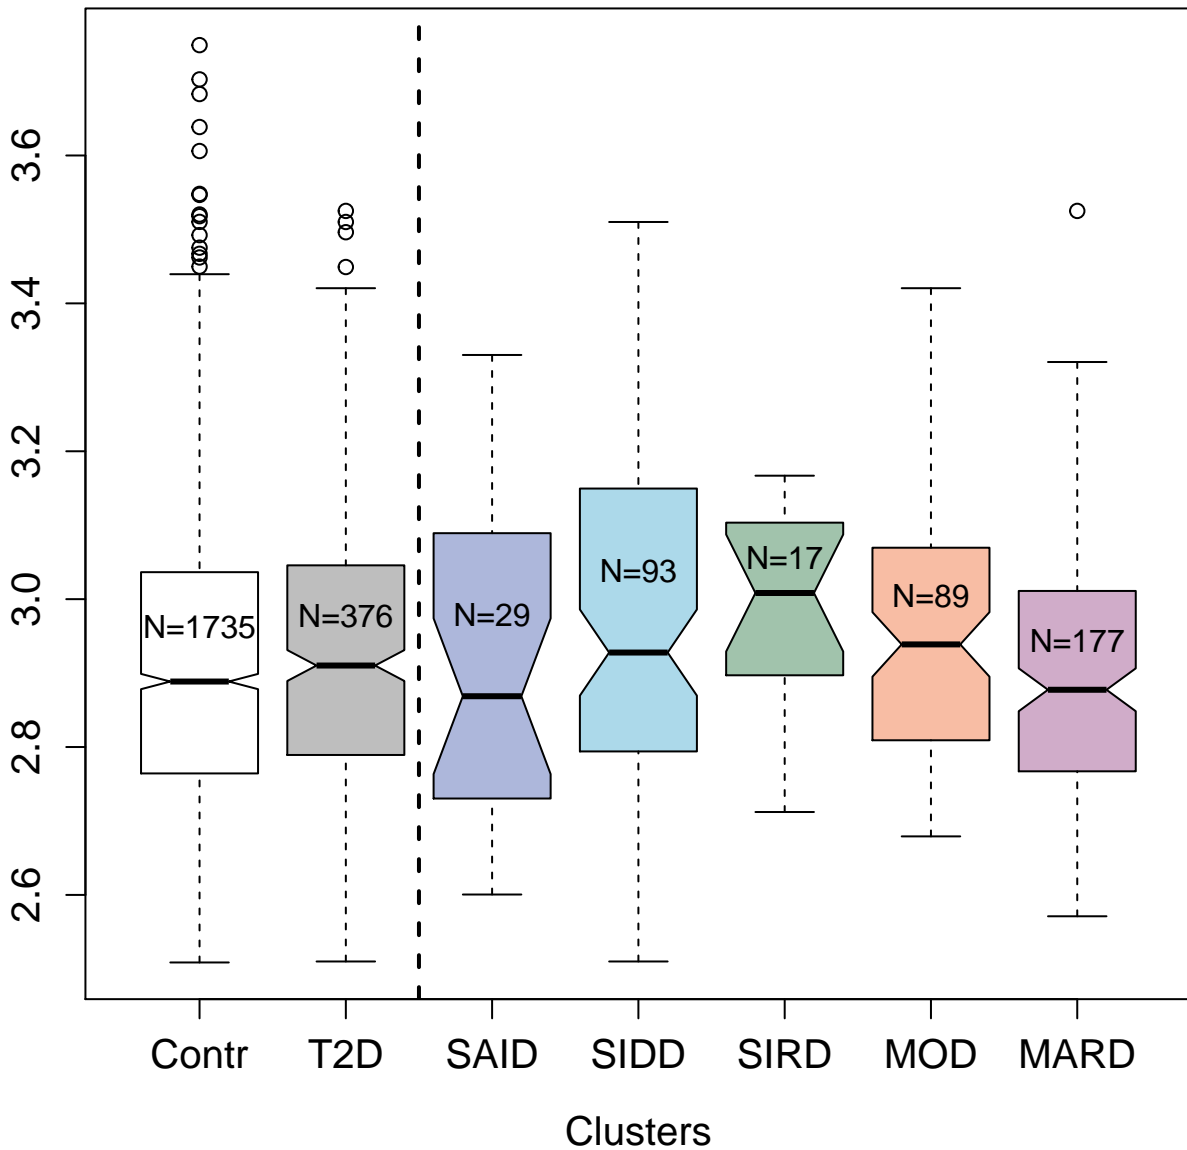



2638-12\_2 : Macrophage colony-stimulating factor 1 receptor

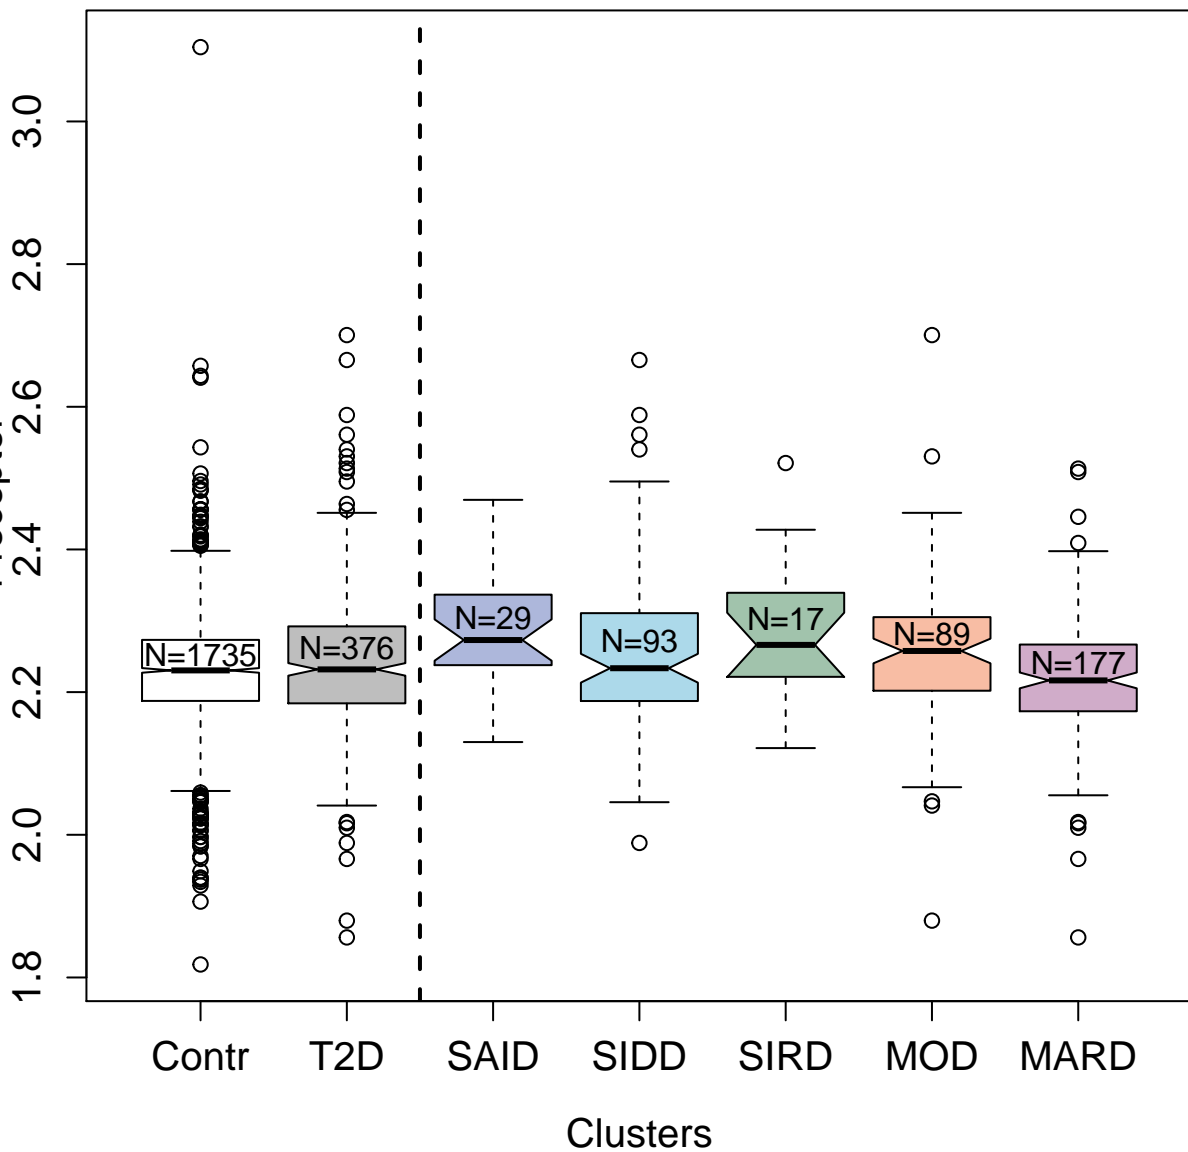

5918-5\_3 : Proteasome activator complex subunit 1

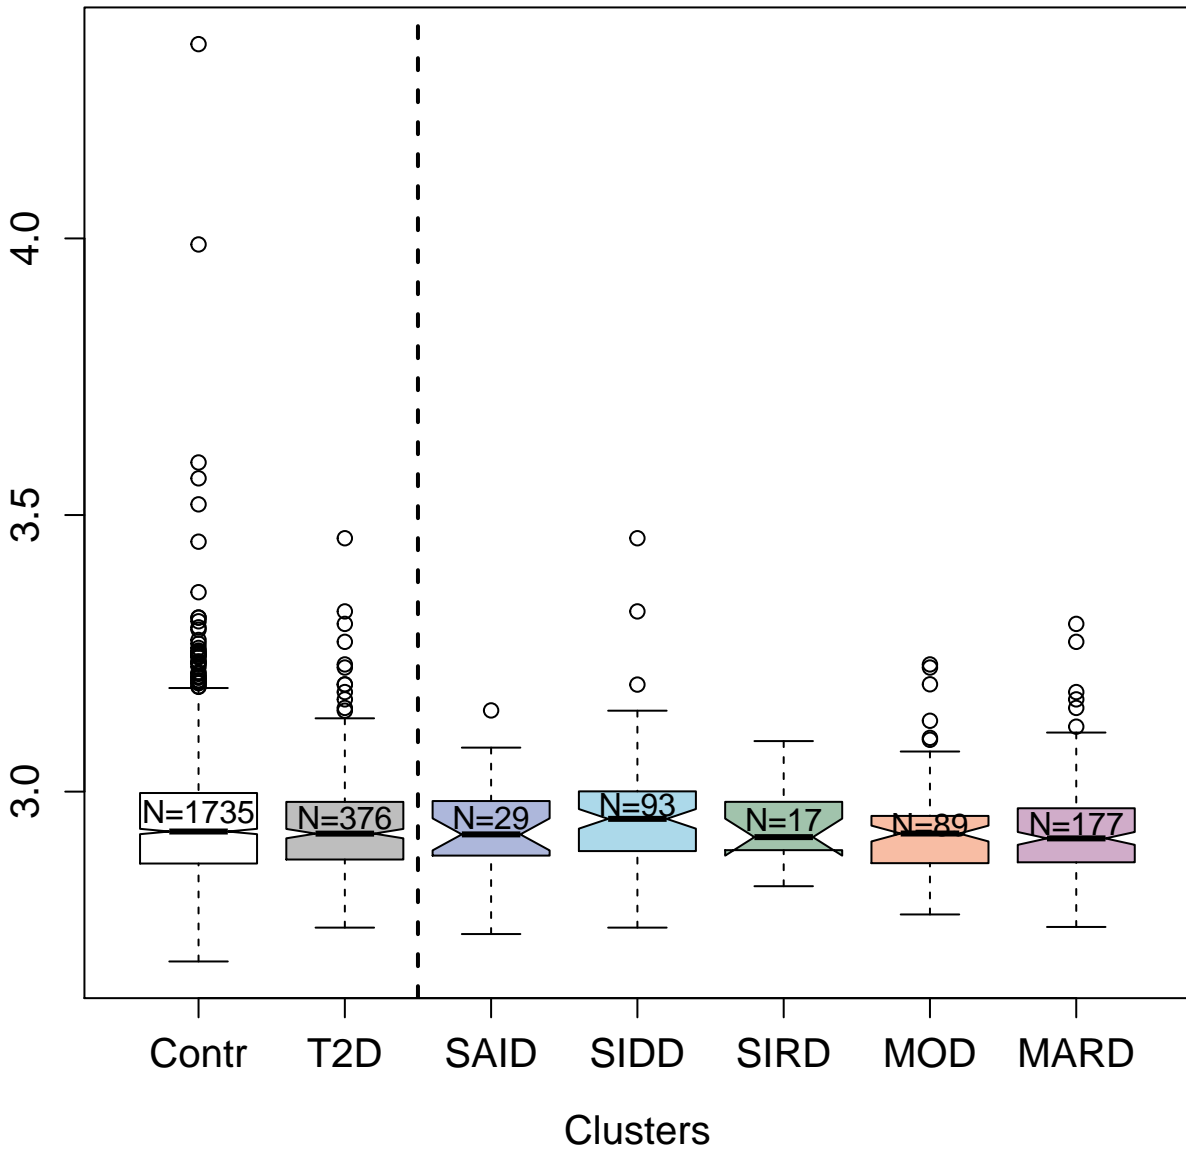

4996-66\_1 : Histidine-rich glycoprotein

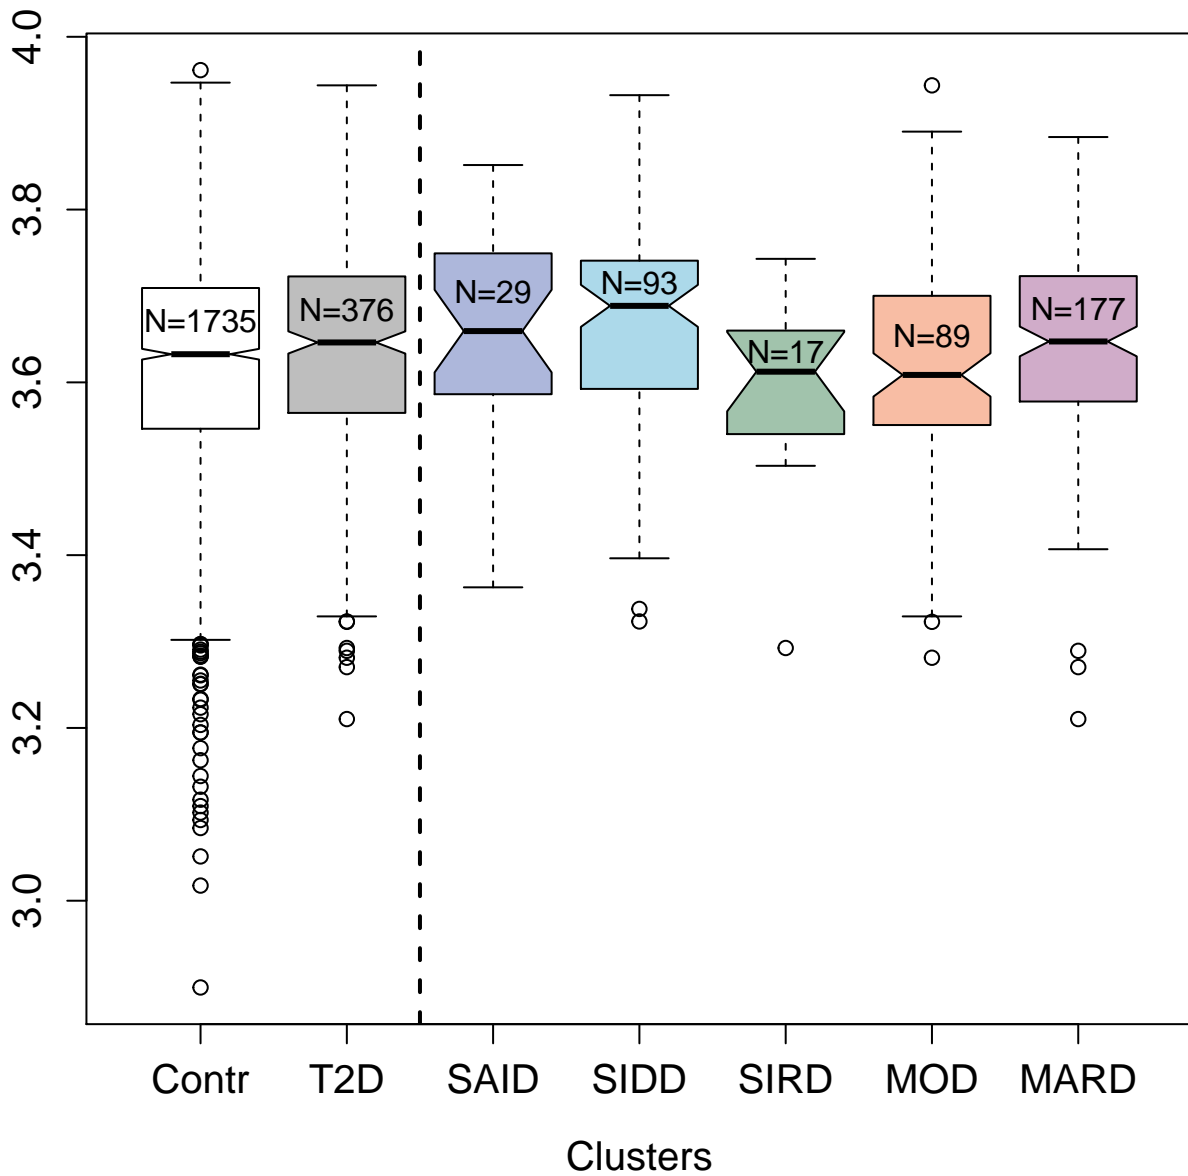

2429-27\_4 : Complement component C8

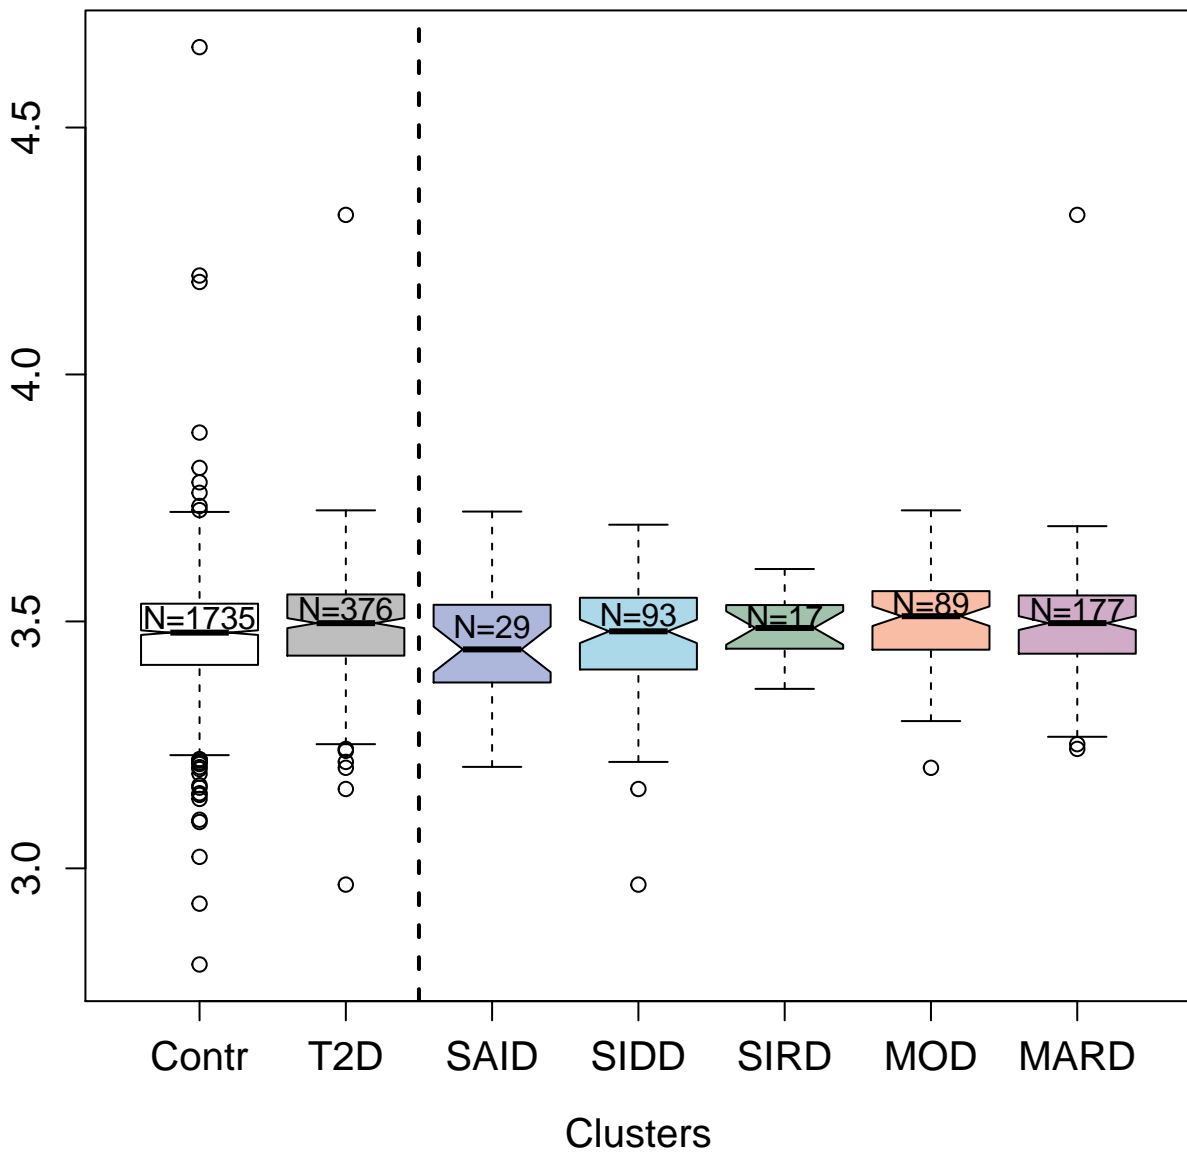

3875-62\_1 : AT-rich interactive domain-containing protein 3A

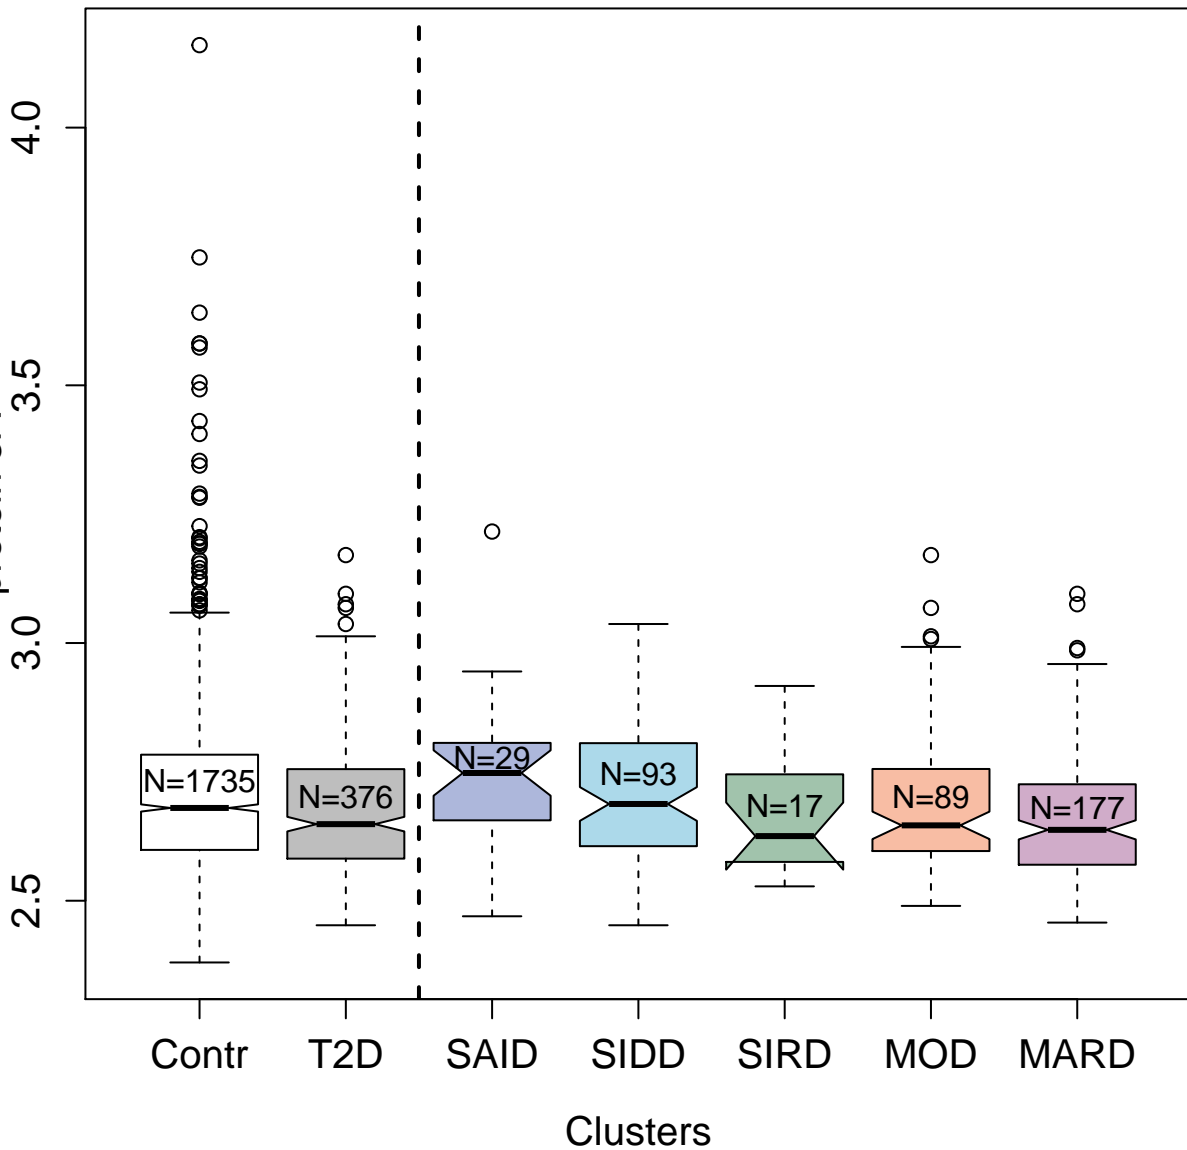

4460-8\_2 : 3-phosphoinositide-dependent protein kinase 1

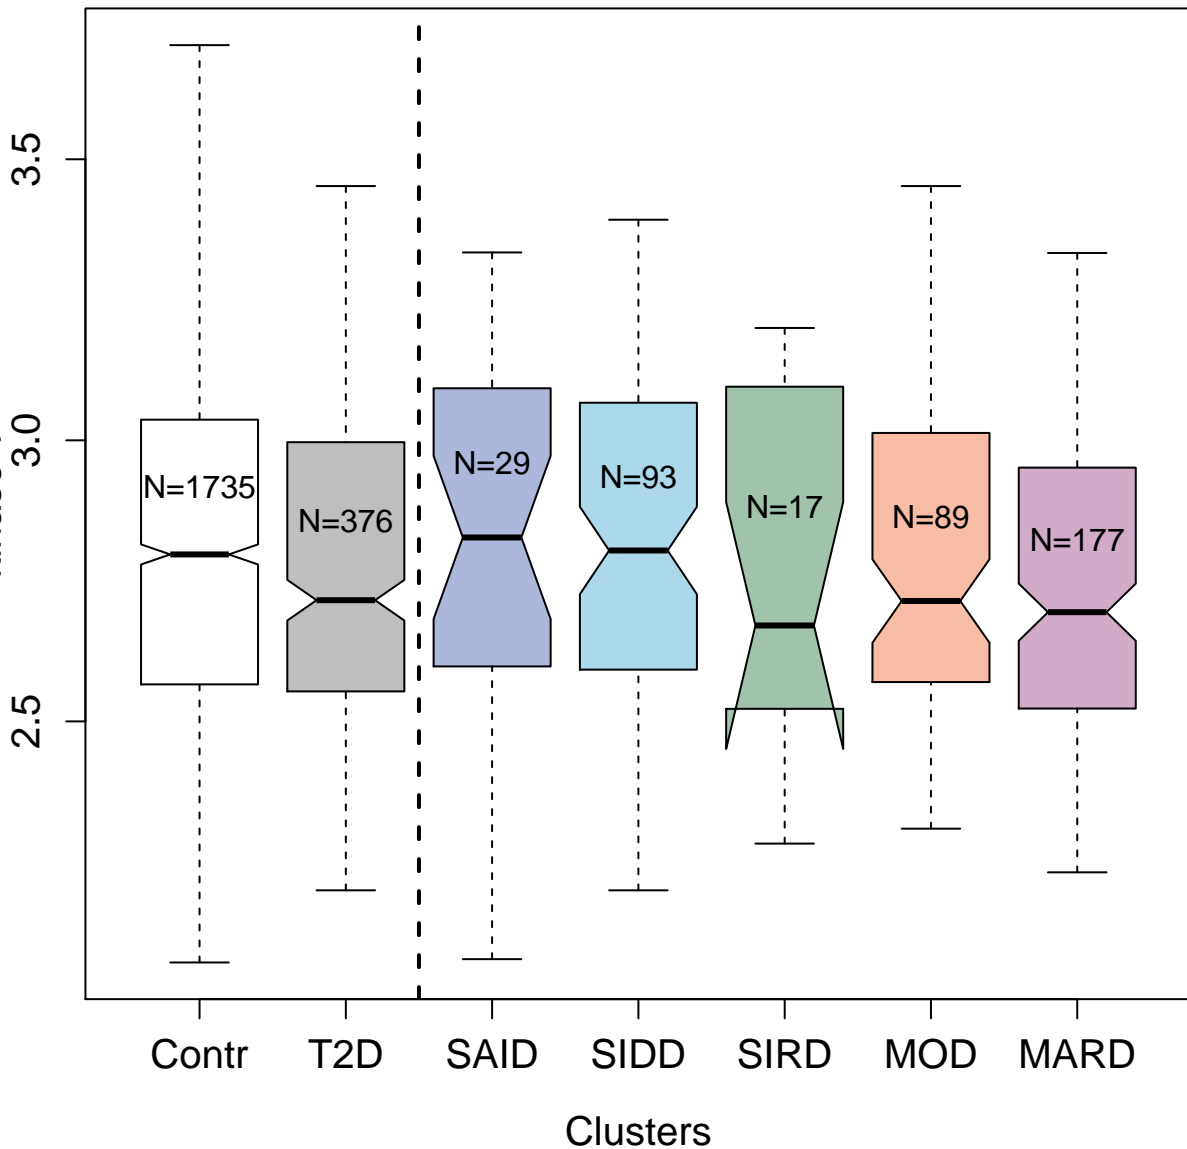

3035-80\_2 : Interleukin-19

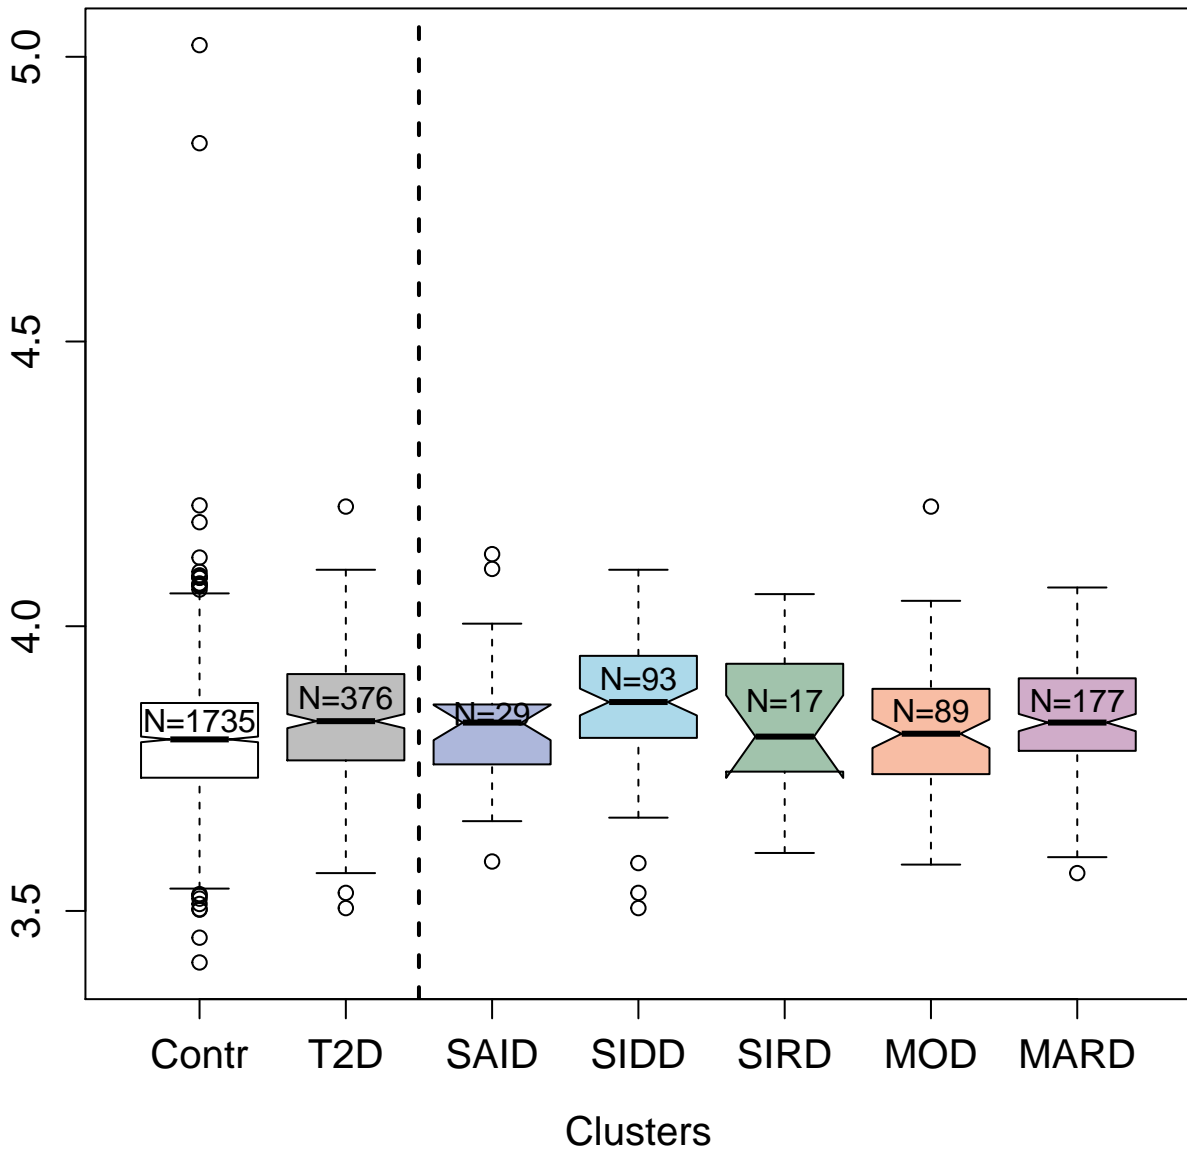

14121-24\_3 : Tumor necrosis factor receptor  
superfamily member 10D

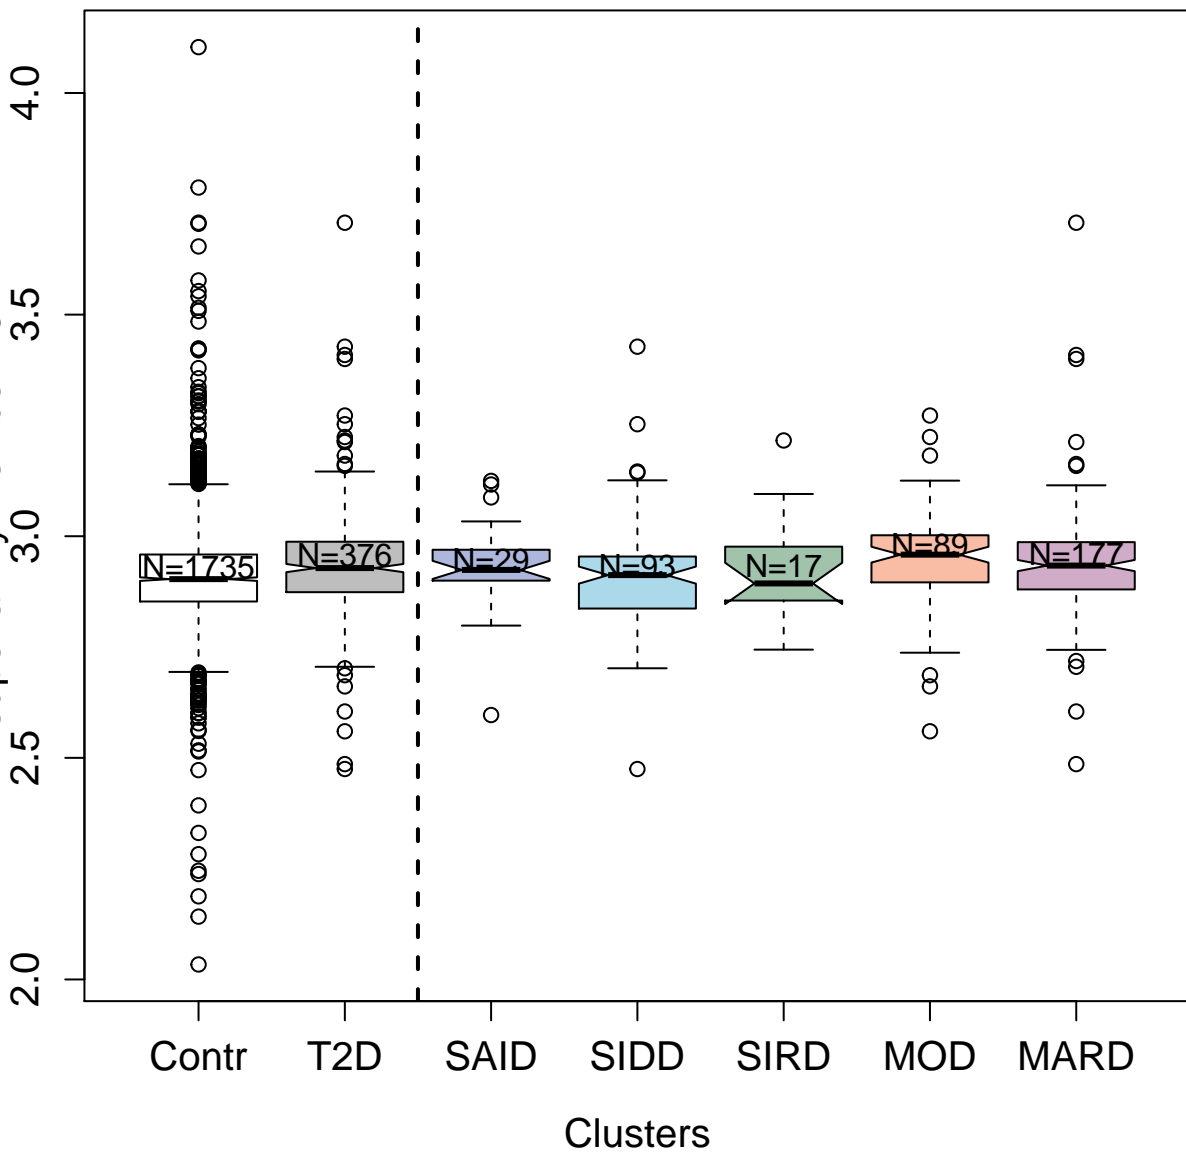



3608-12\_1 : Dipeptidyl peptidase 2

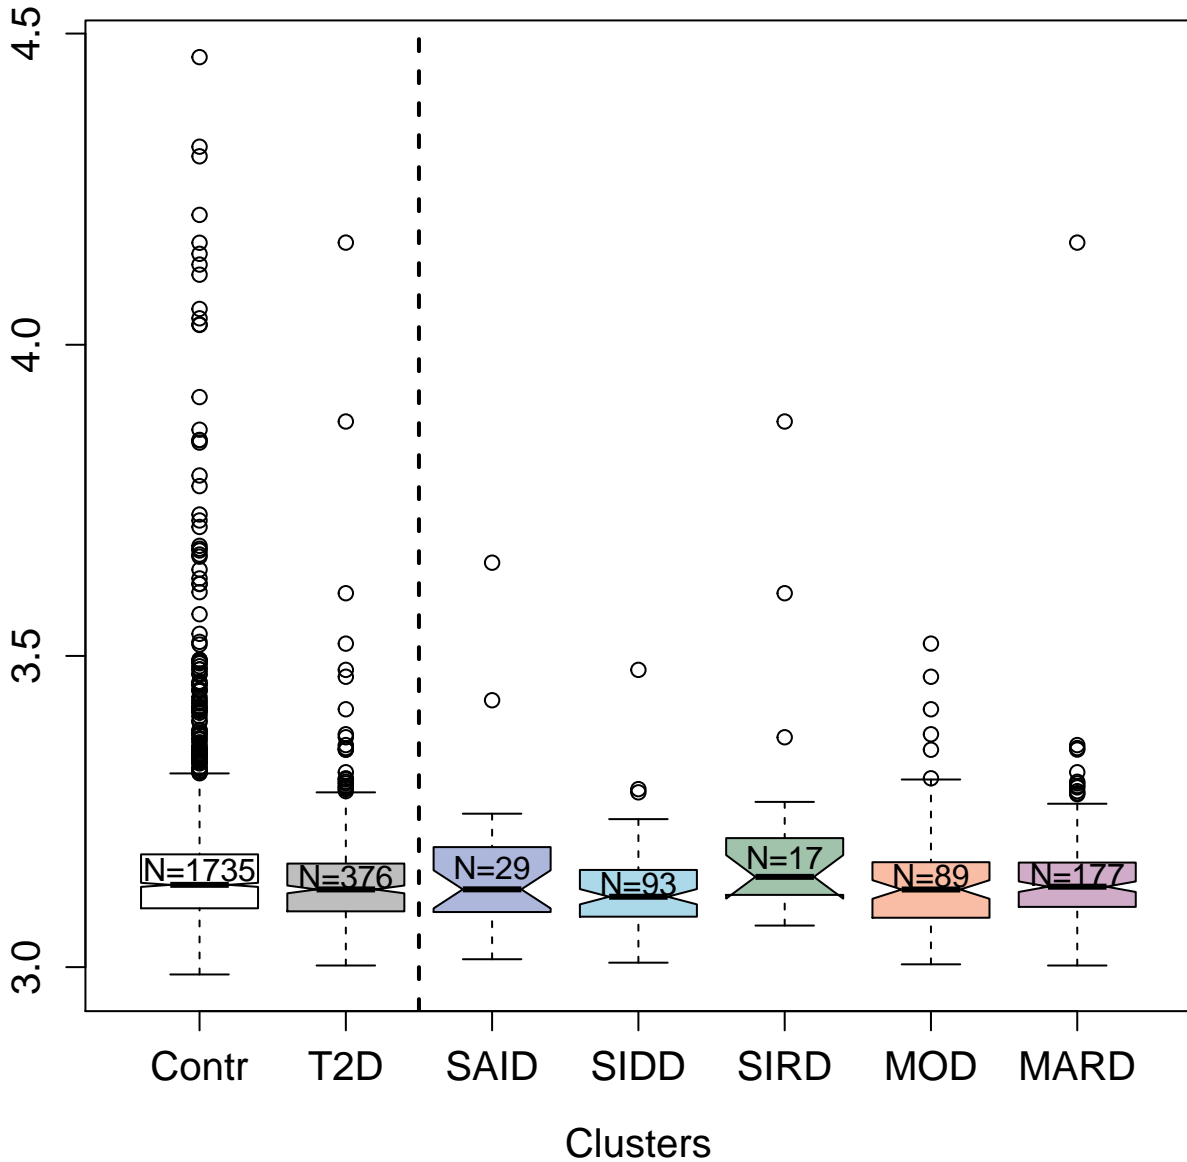

4131-72\_2 : Fibronectin

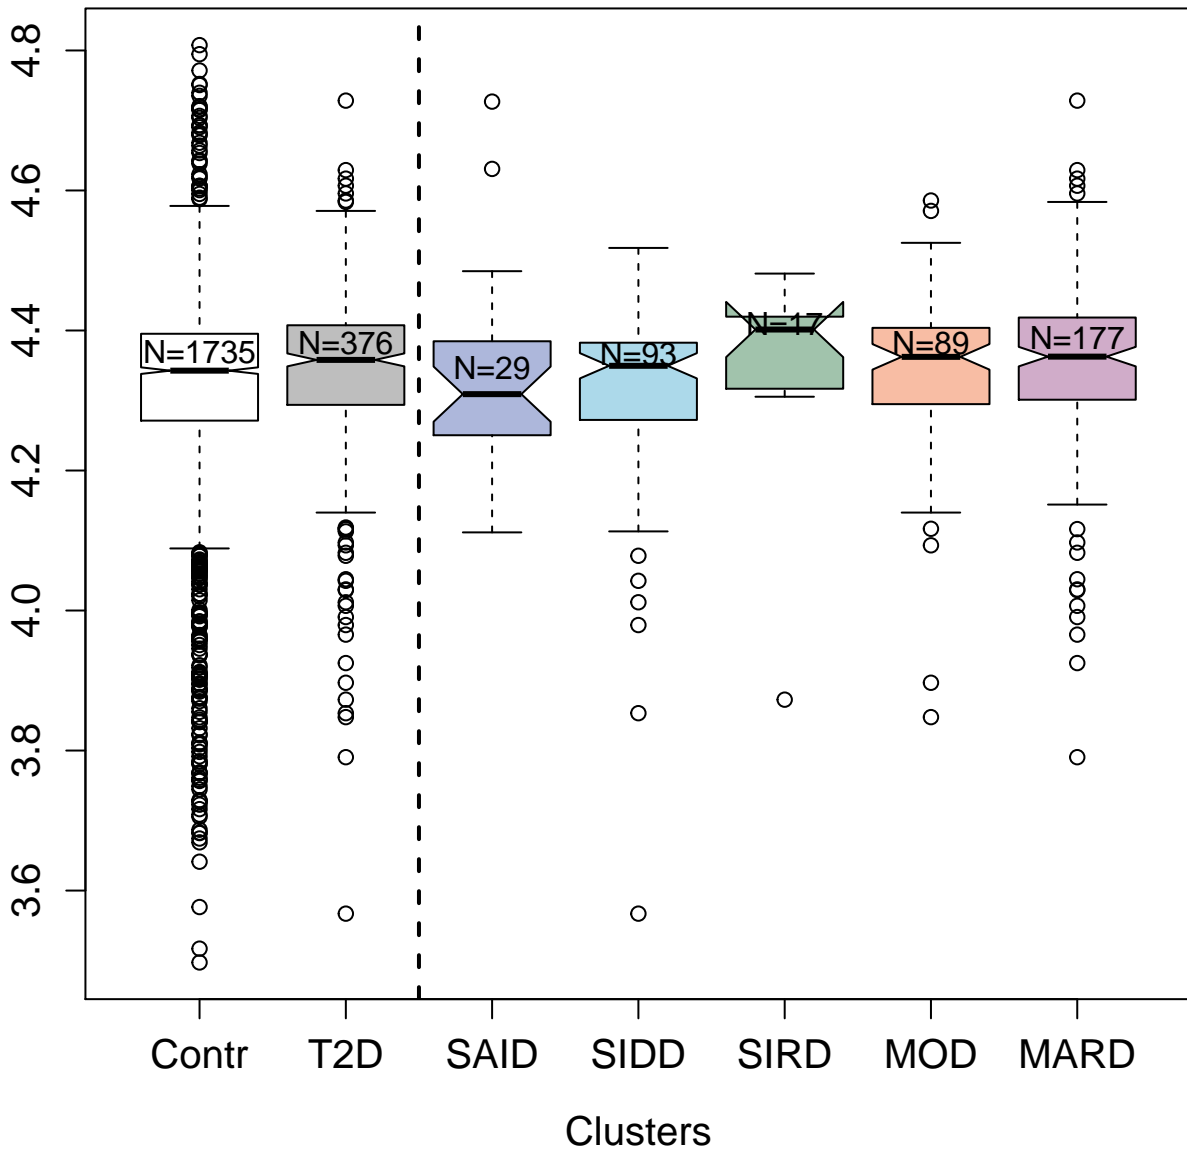

3805-16\_2 : Endothelial cell-specific molecule 1

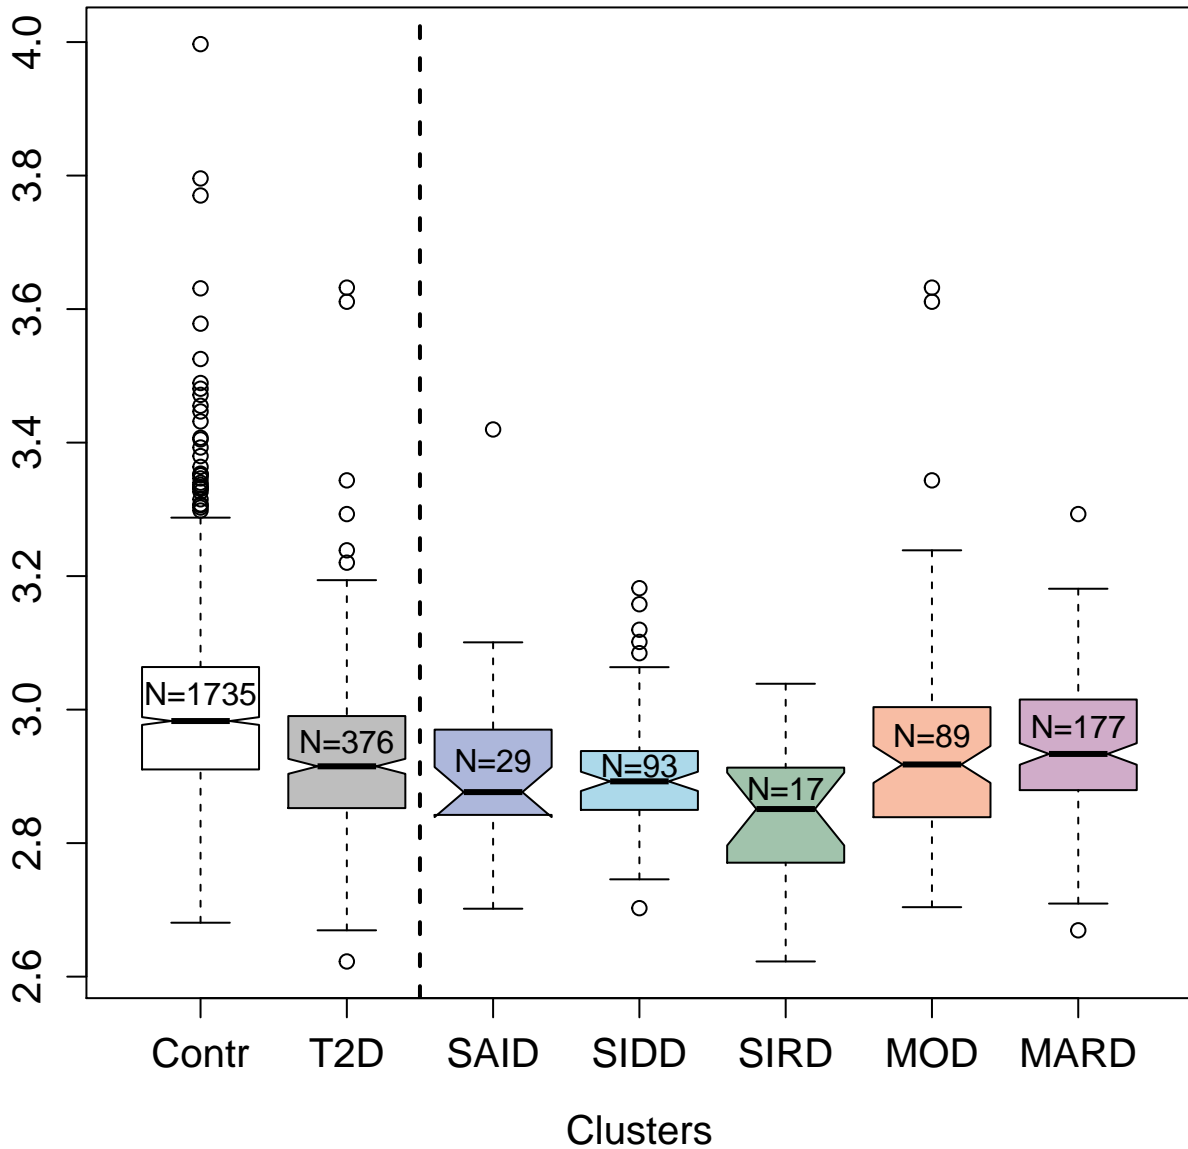

4499-21\_1 : Platelet-derived growth factor

subunit A

4.5  
4.0  
3.5

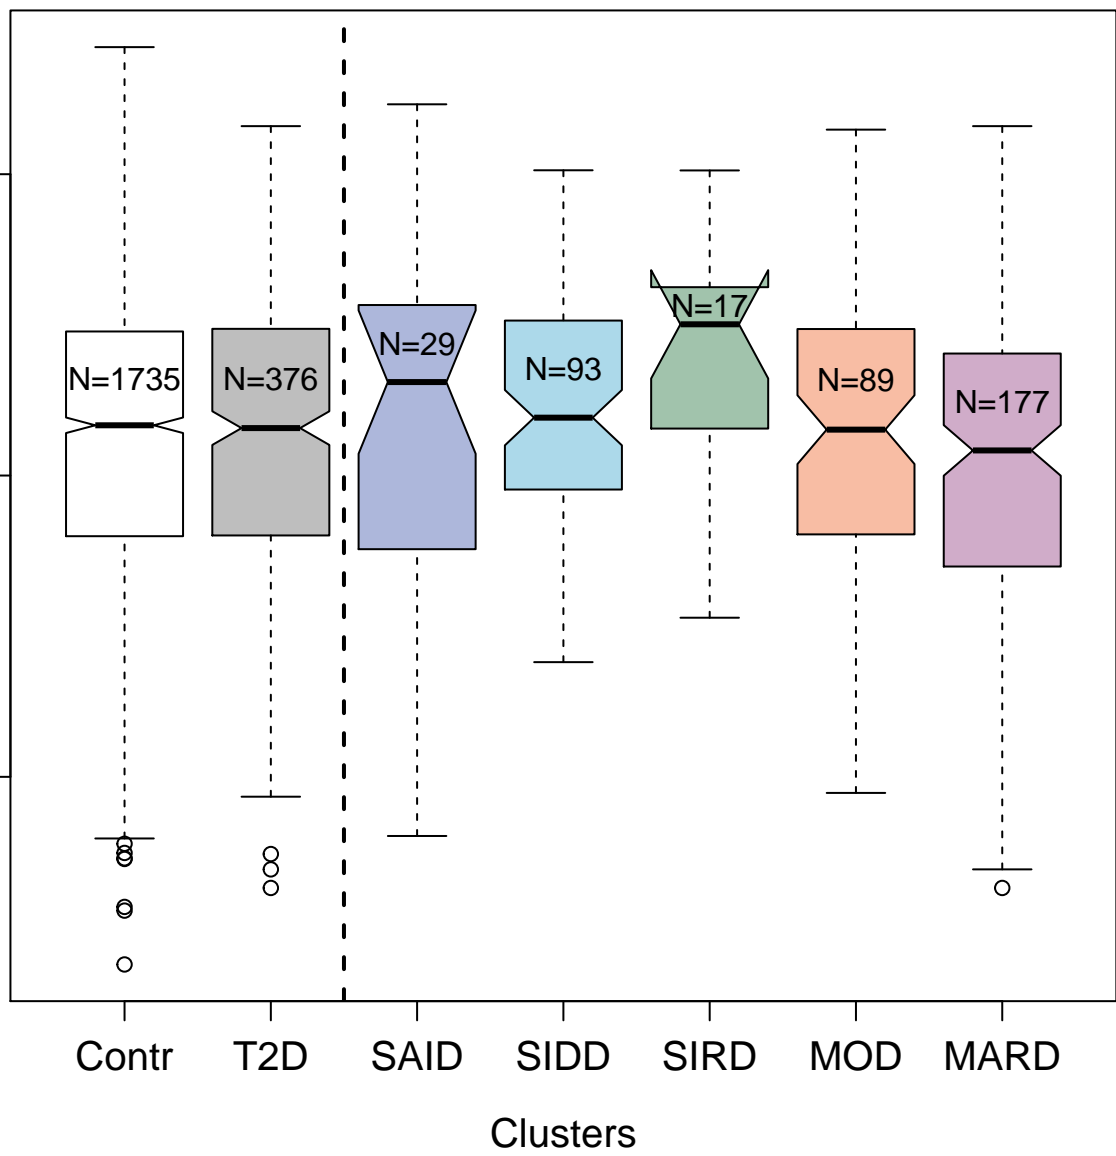

9169-14\_3 : Small ubiquitin-related modifier 3

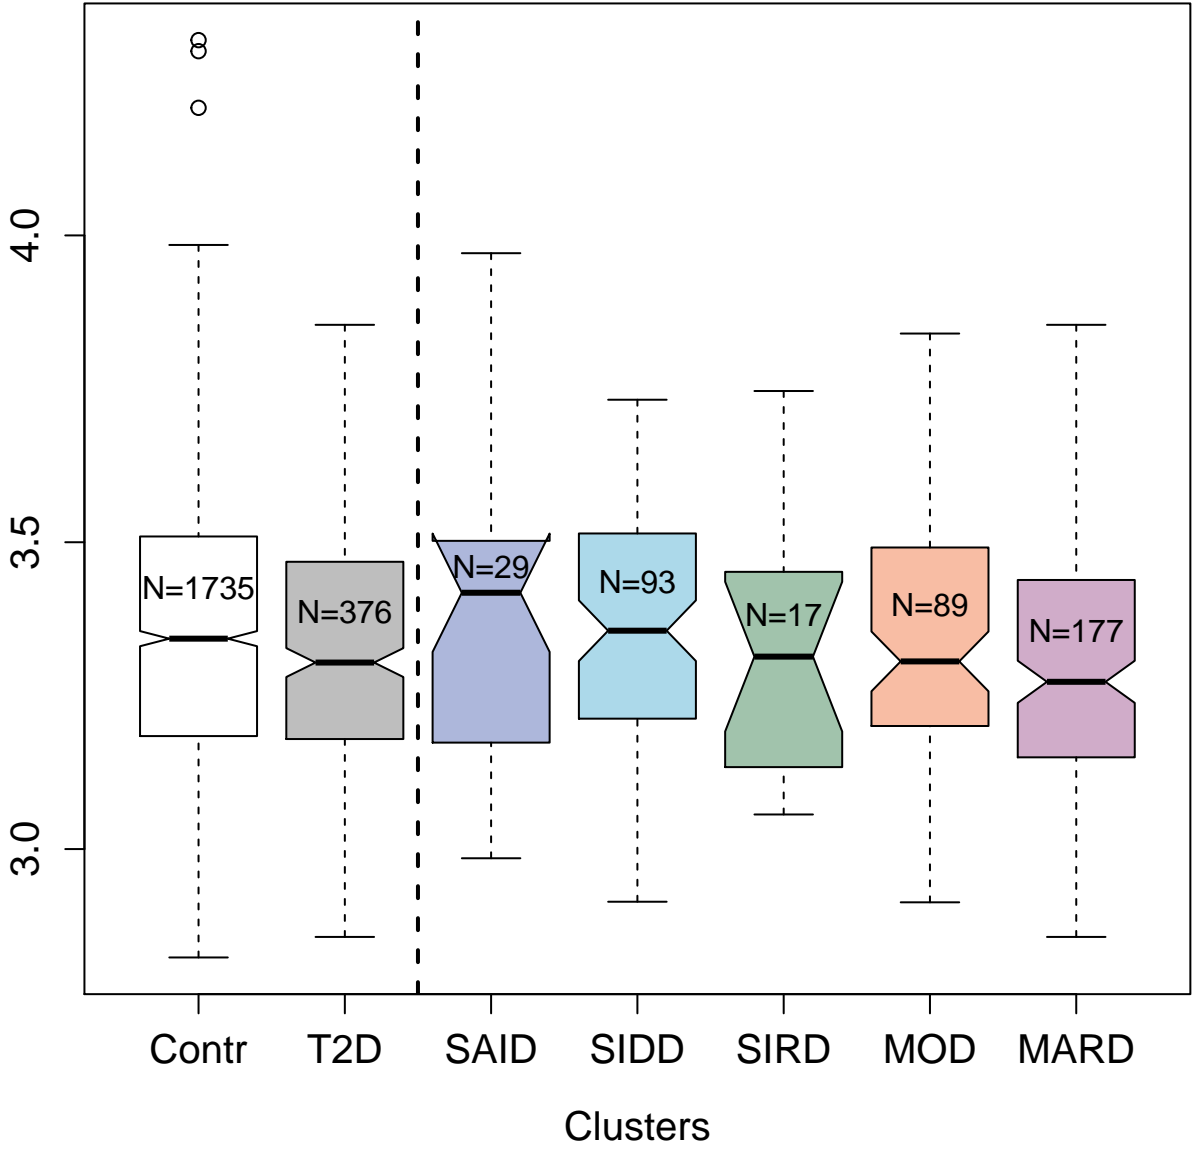

9204-33\_3 : Pro-opiomelanocortin

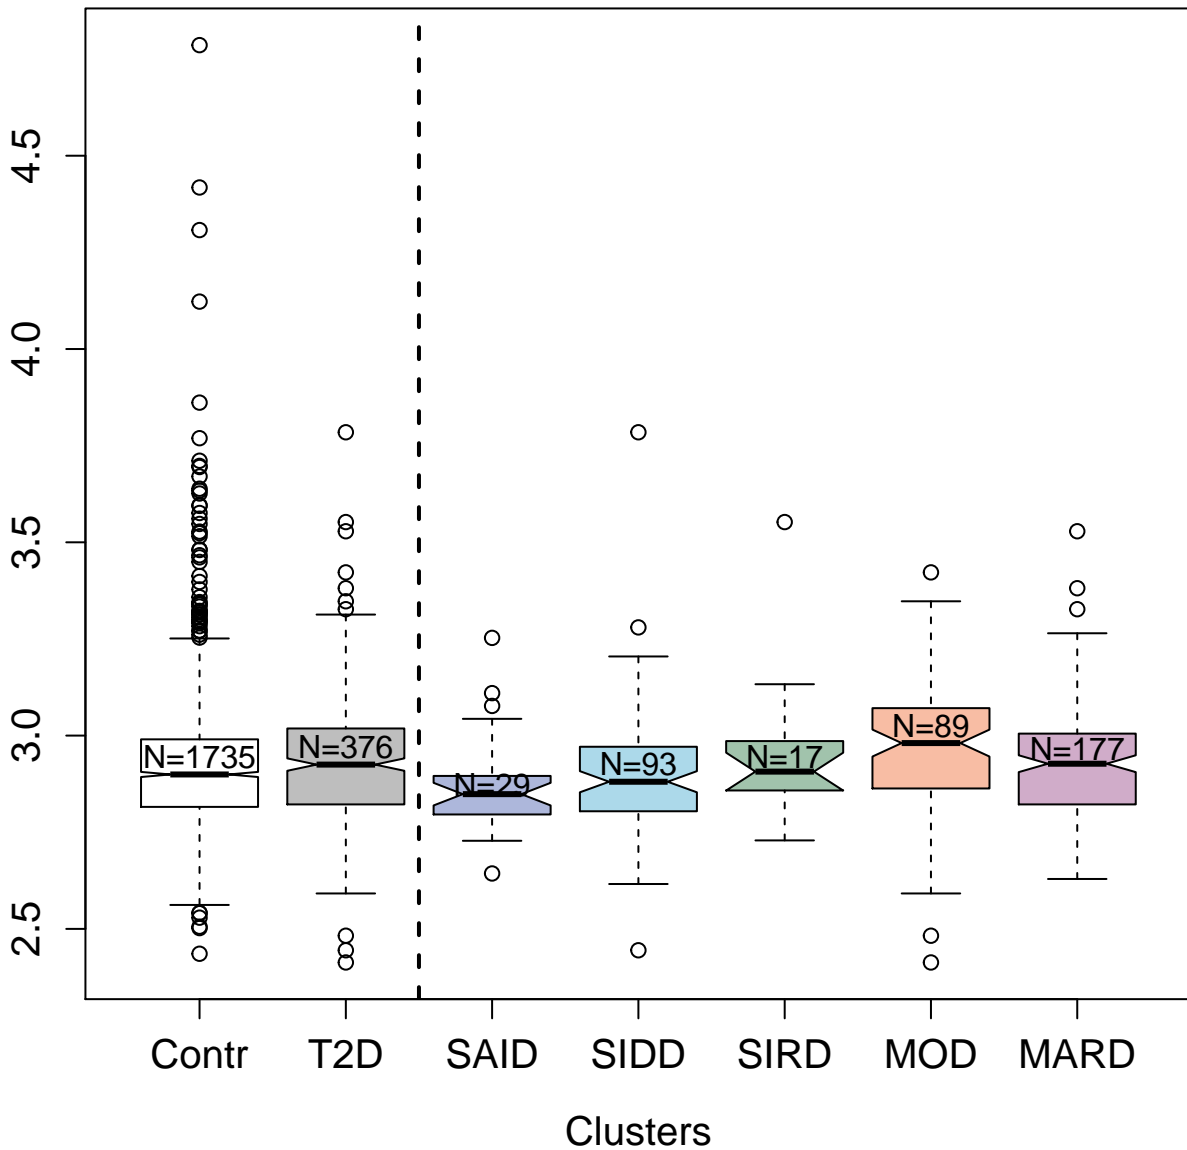

3611-70\_4 : Endothelin-converting enzyme 1

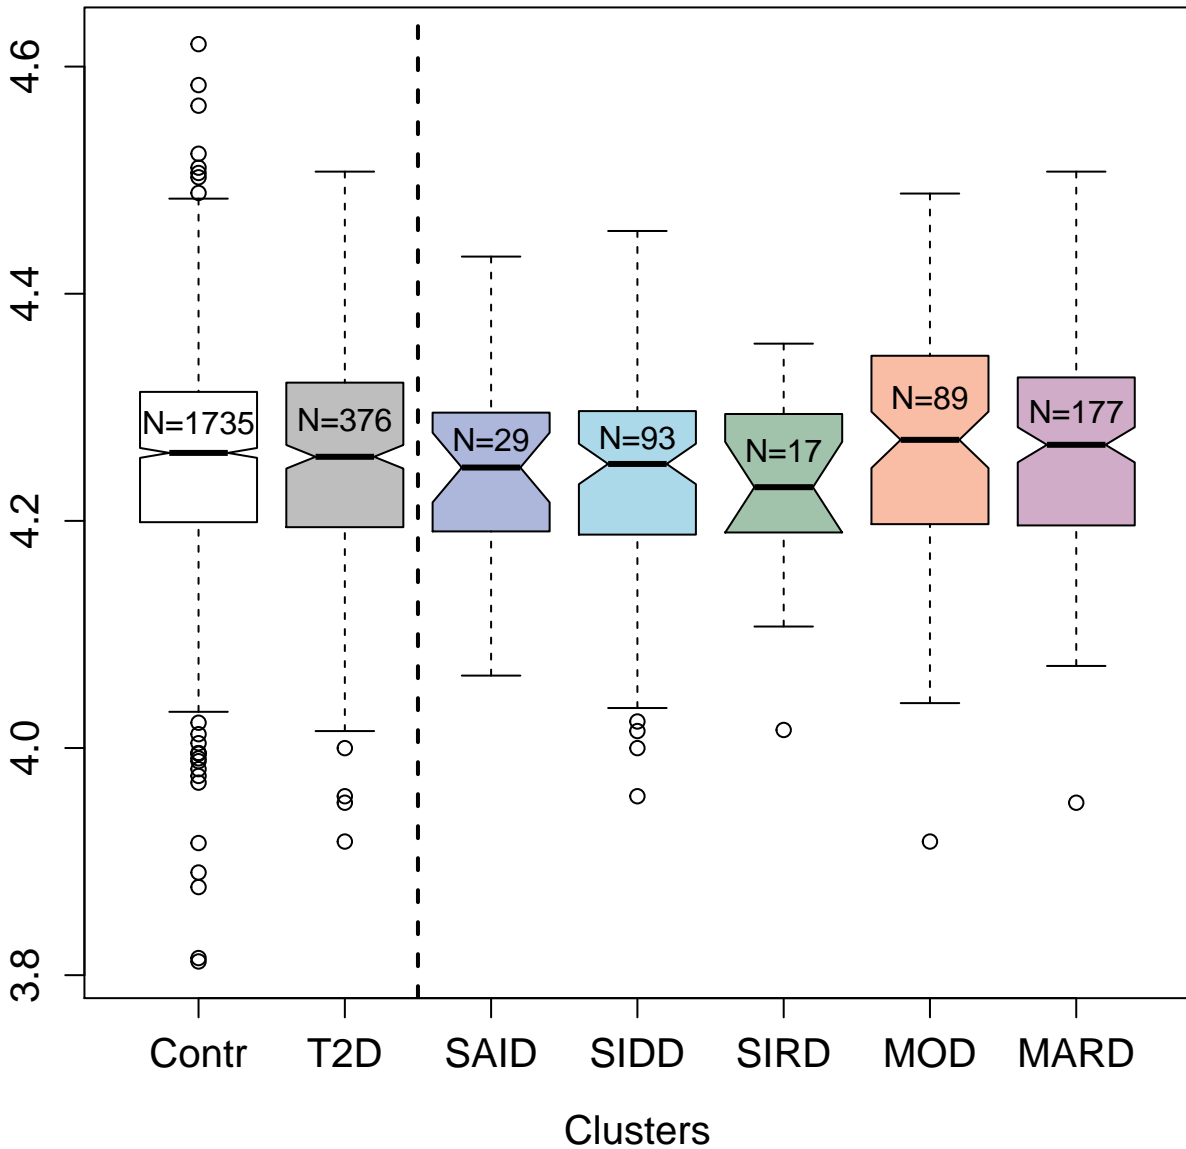

3326-58\_2 : Cell adhesion molecule 1

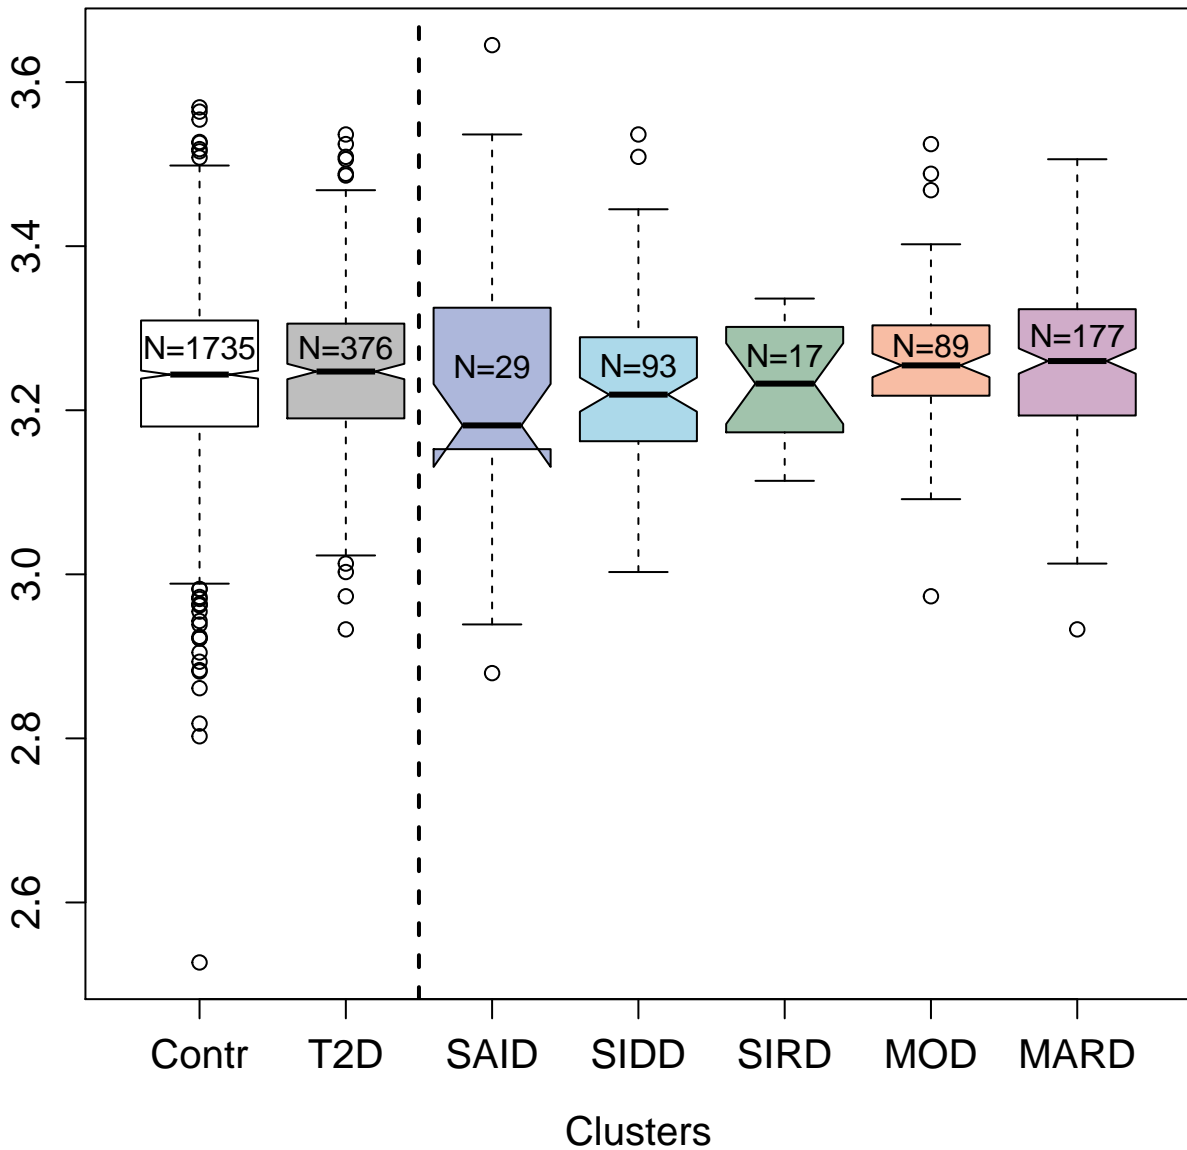



5275-28\_2 : Proto-oncogene vav

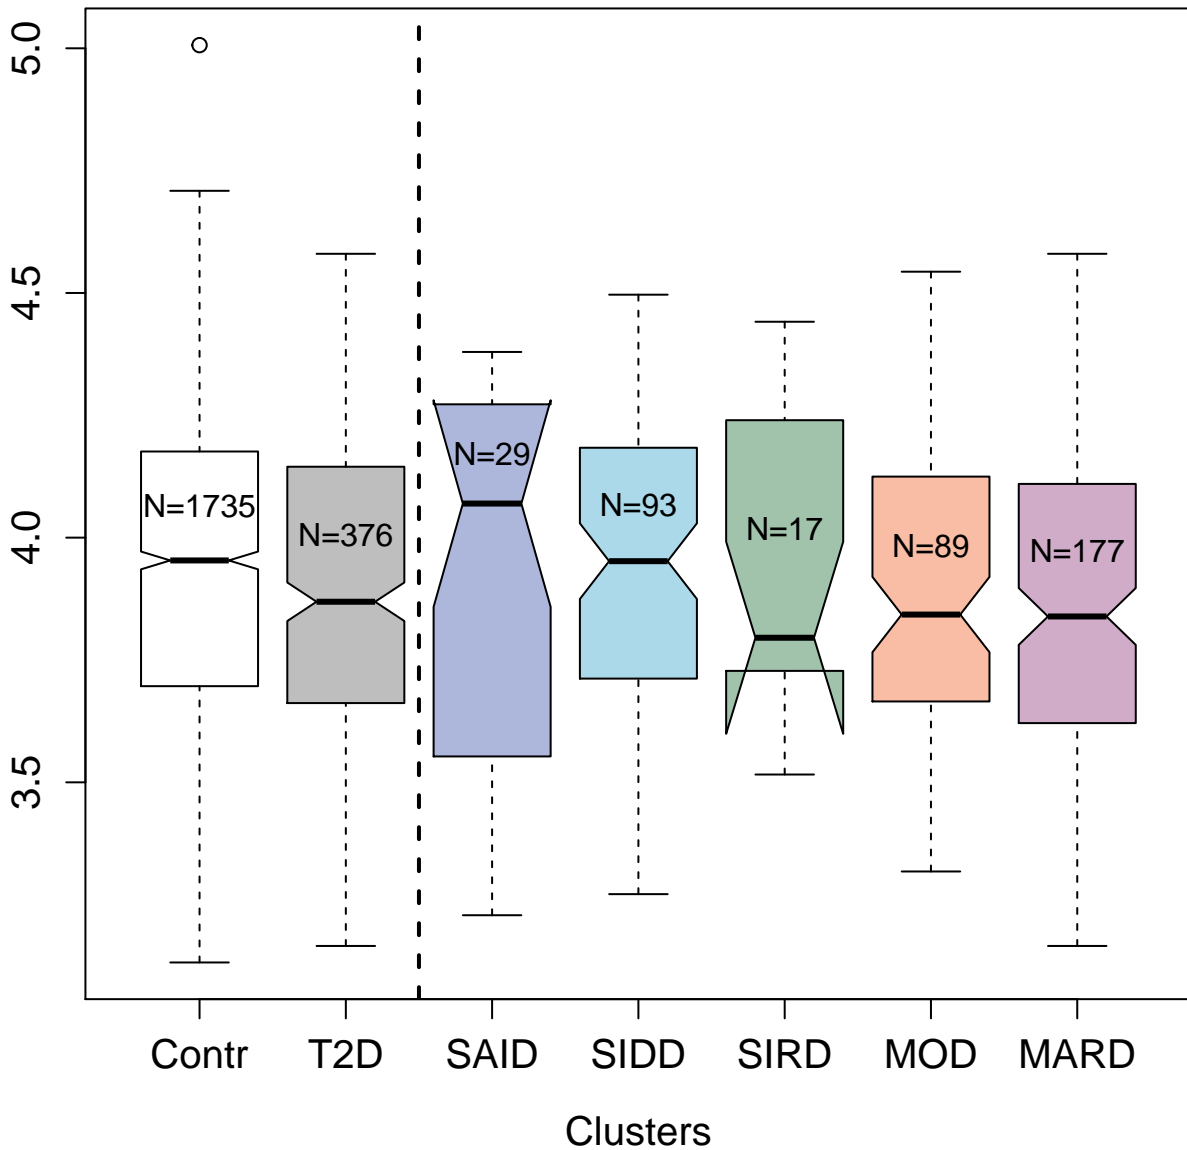

3152-57\_1 : Tumor necrosis factor receptor  
superfamily member 1B

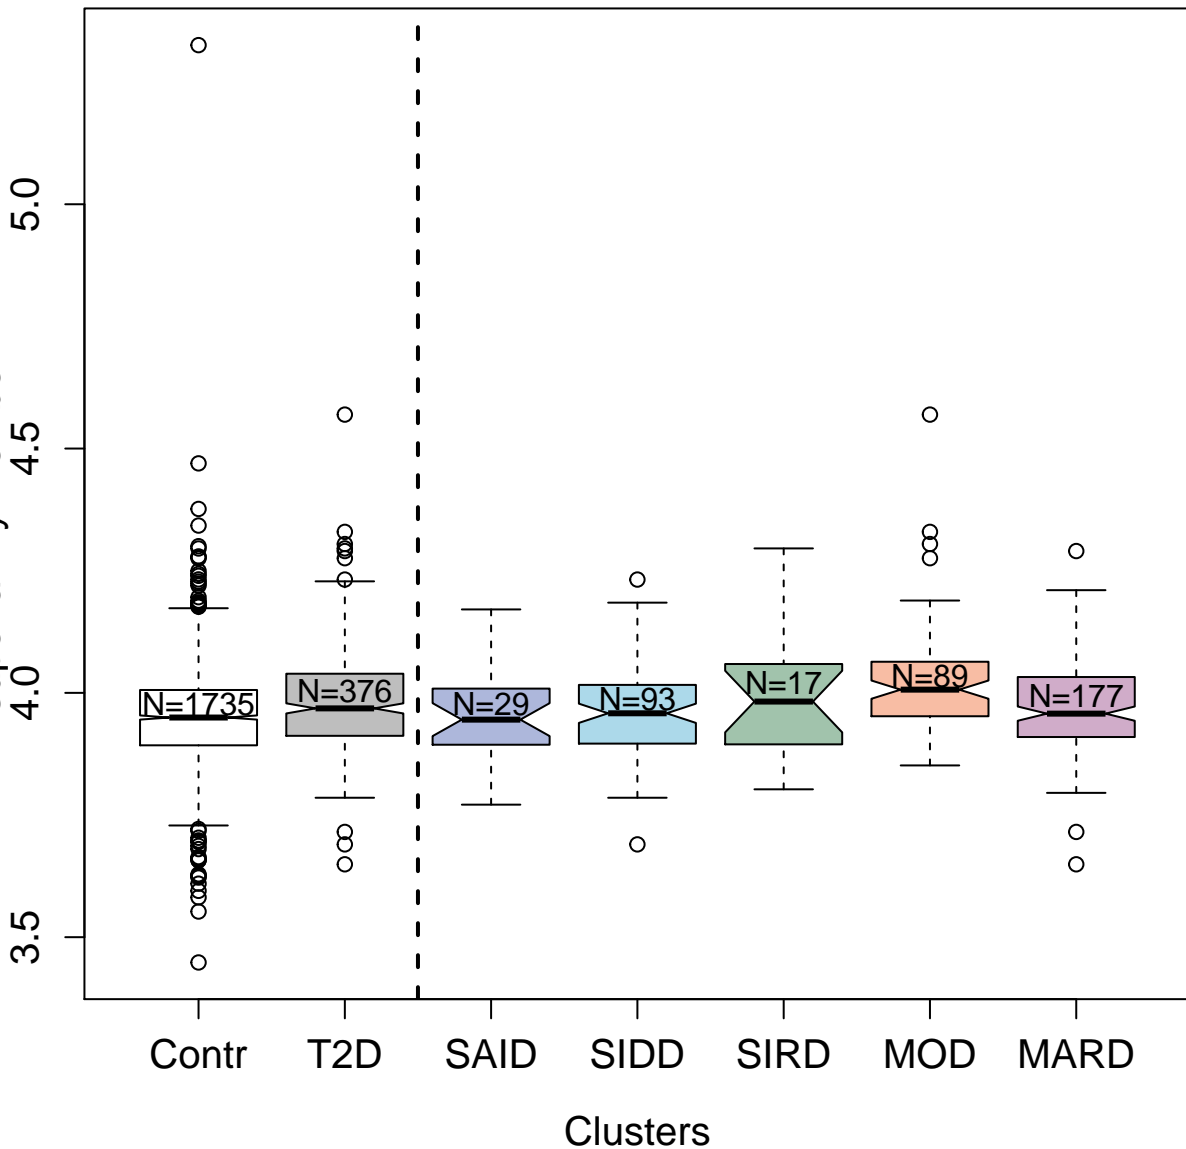

4158-54\_2 : Urokinase-type plasminogen activator

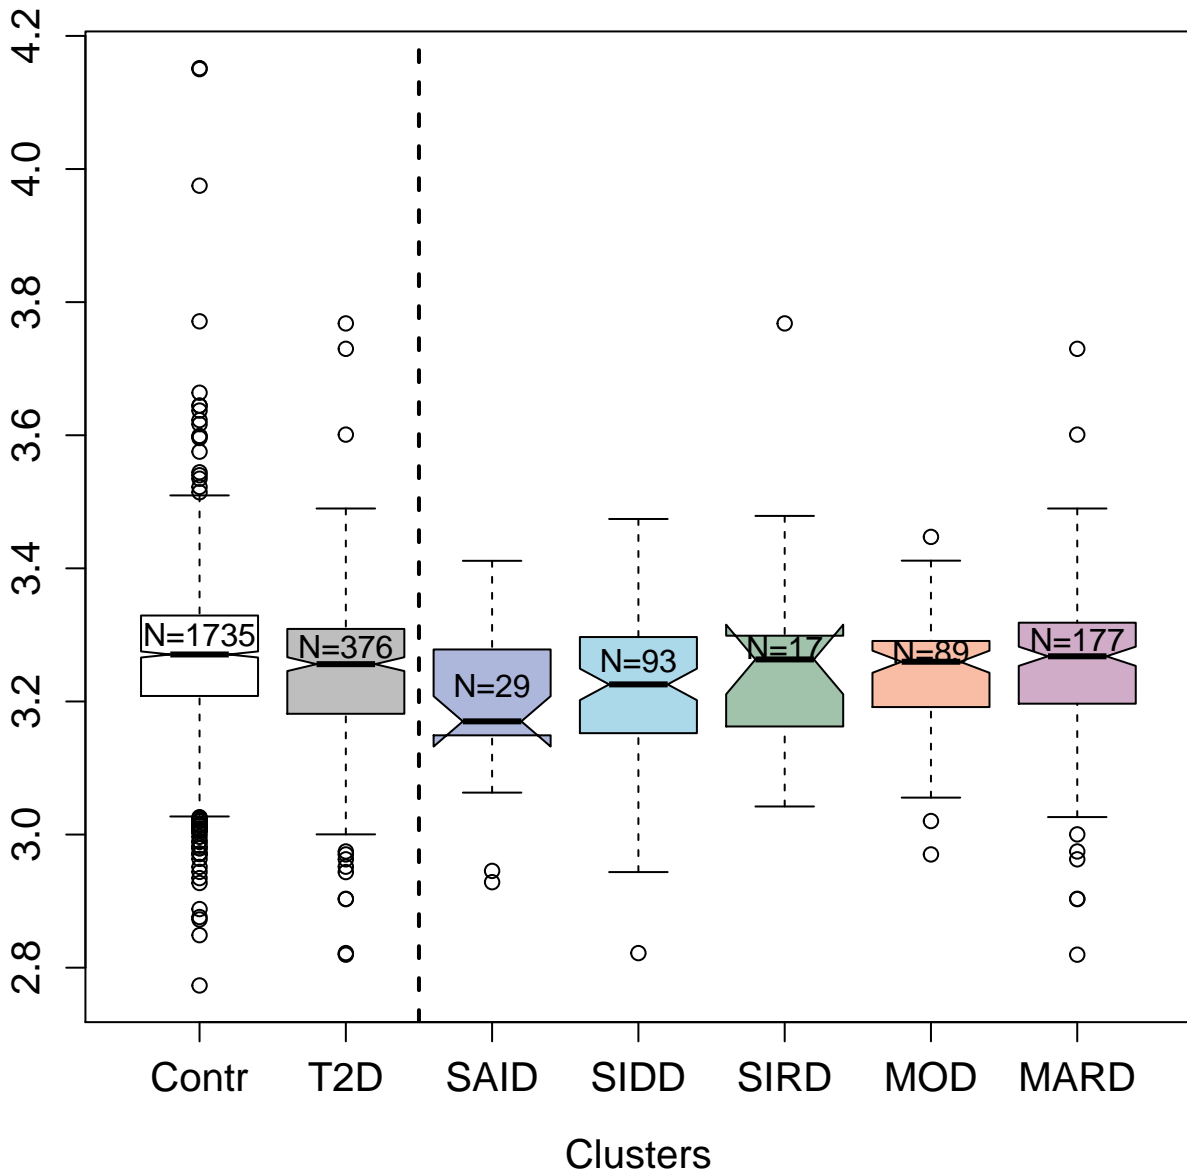

13118-5\_3 : SPARC-related modular calcium-binding

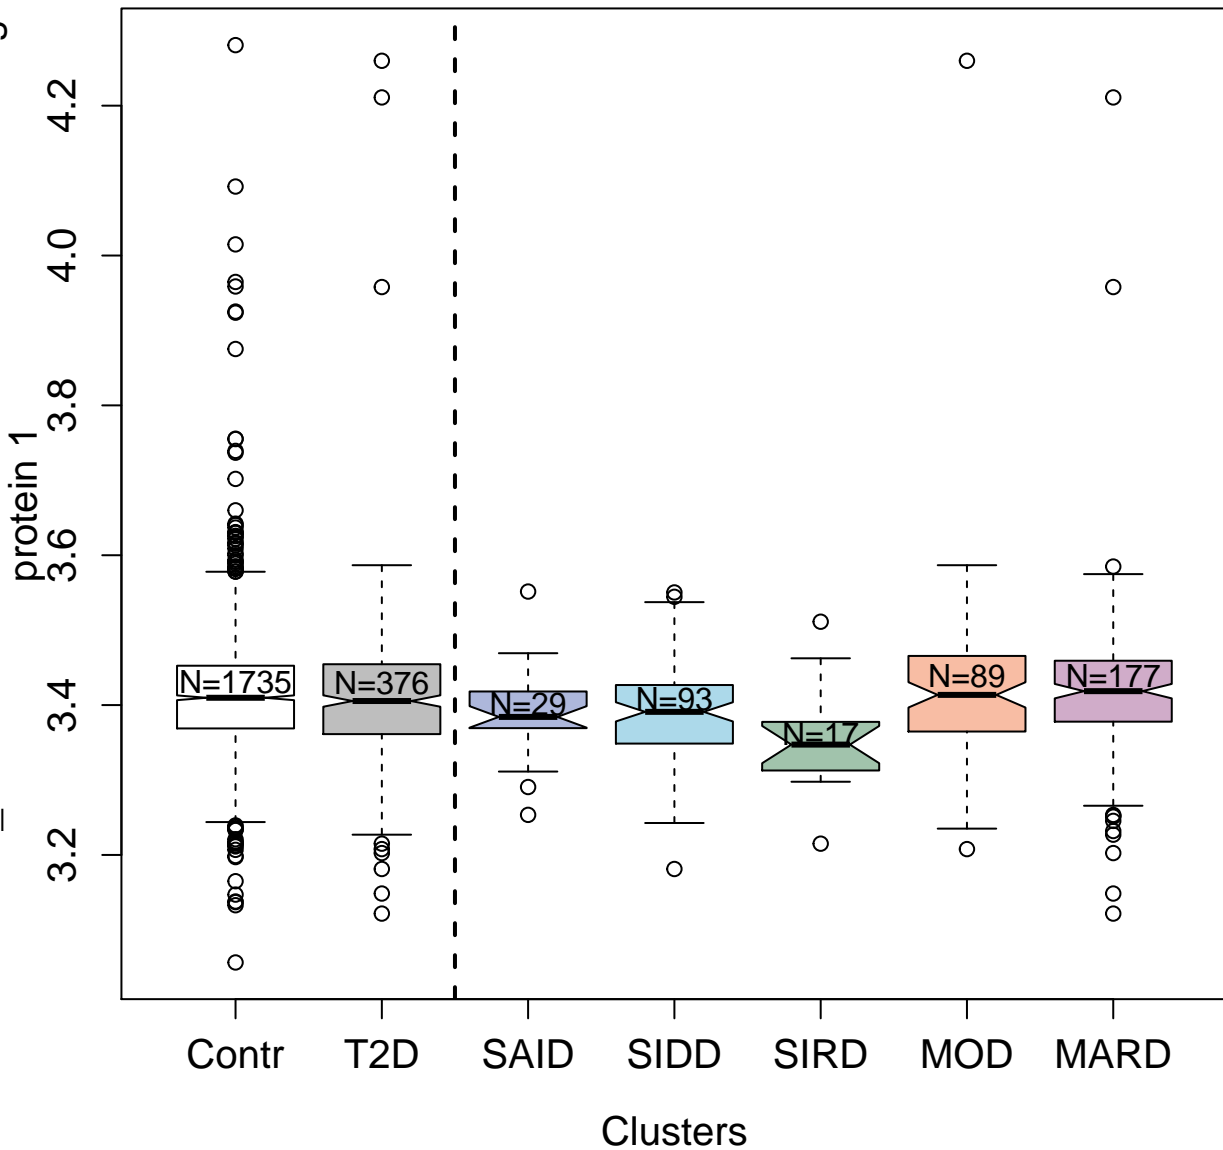

3079-62\_2 : Retinoic acid receptor responder  
protein 2

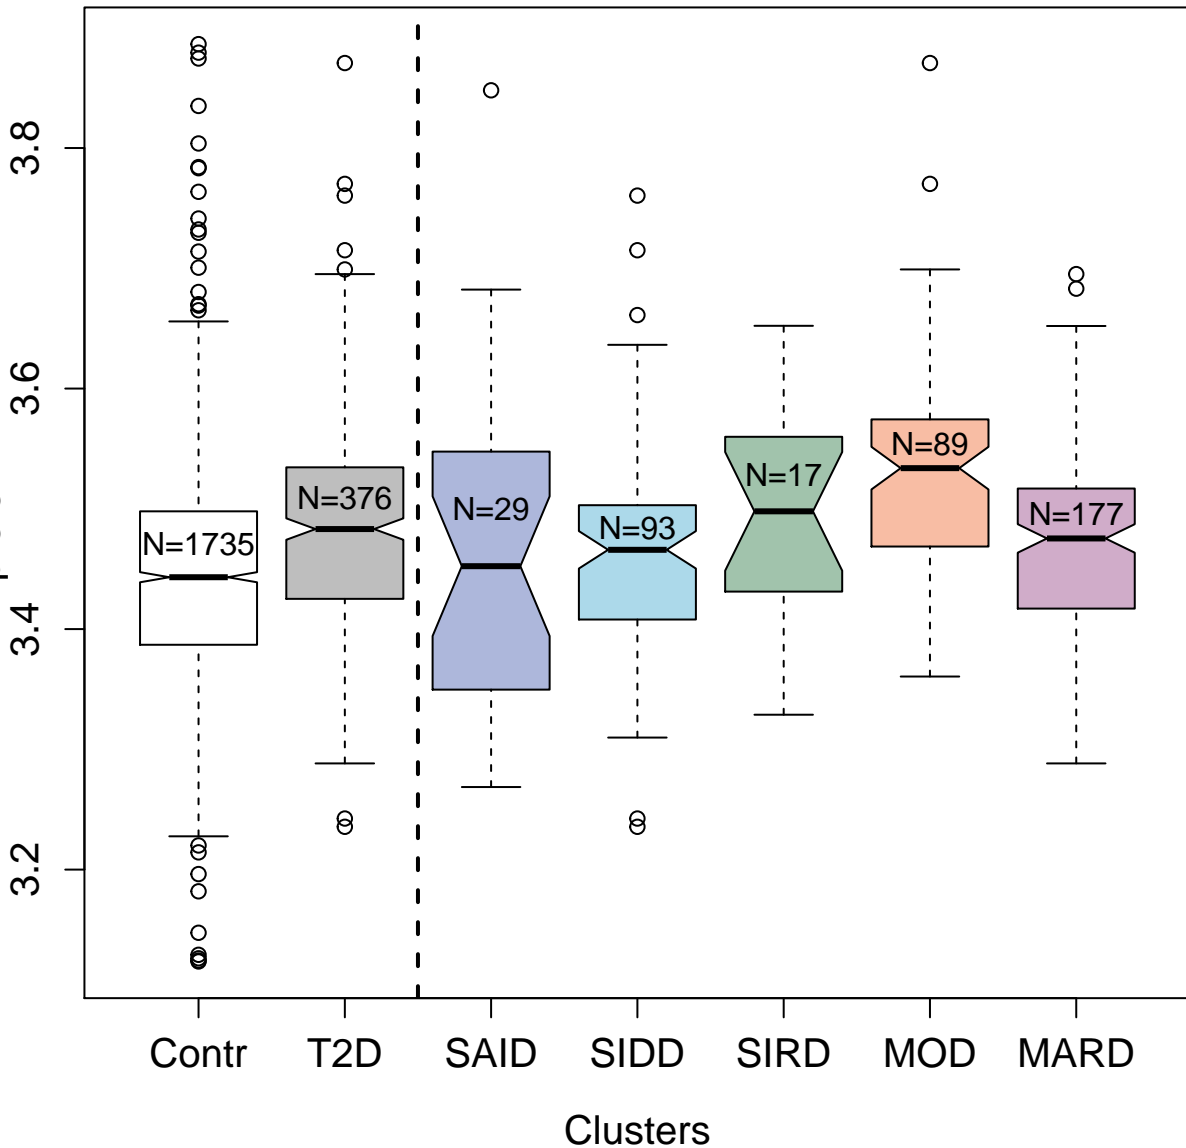

5134-52\_2 : Hepatitis A virus cellular receptor 2

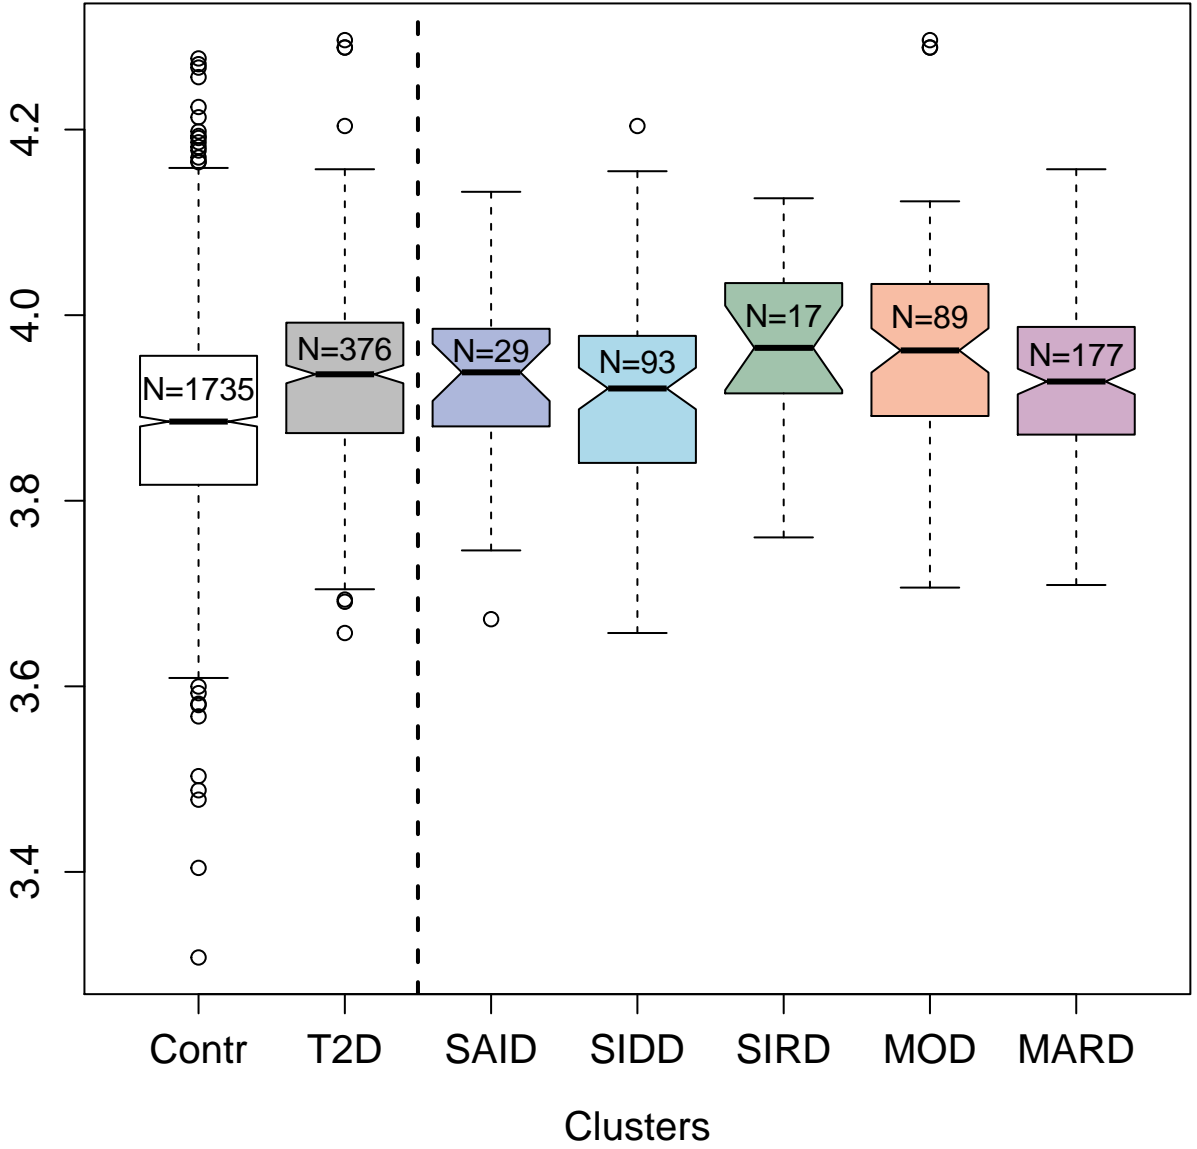

4983-6\_1 : Endoplasmic reticulum resident protein

29

3.4  
3.6  
3.8  
4.0  
4.2  
4.4

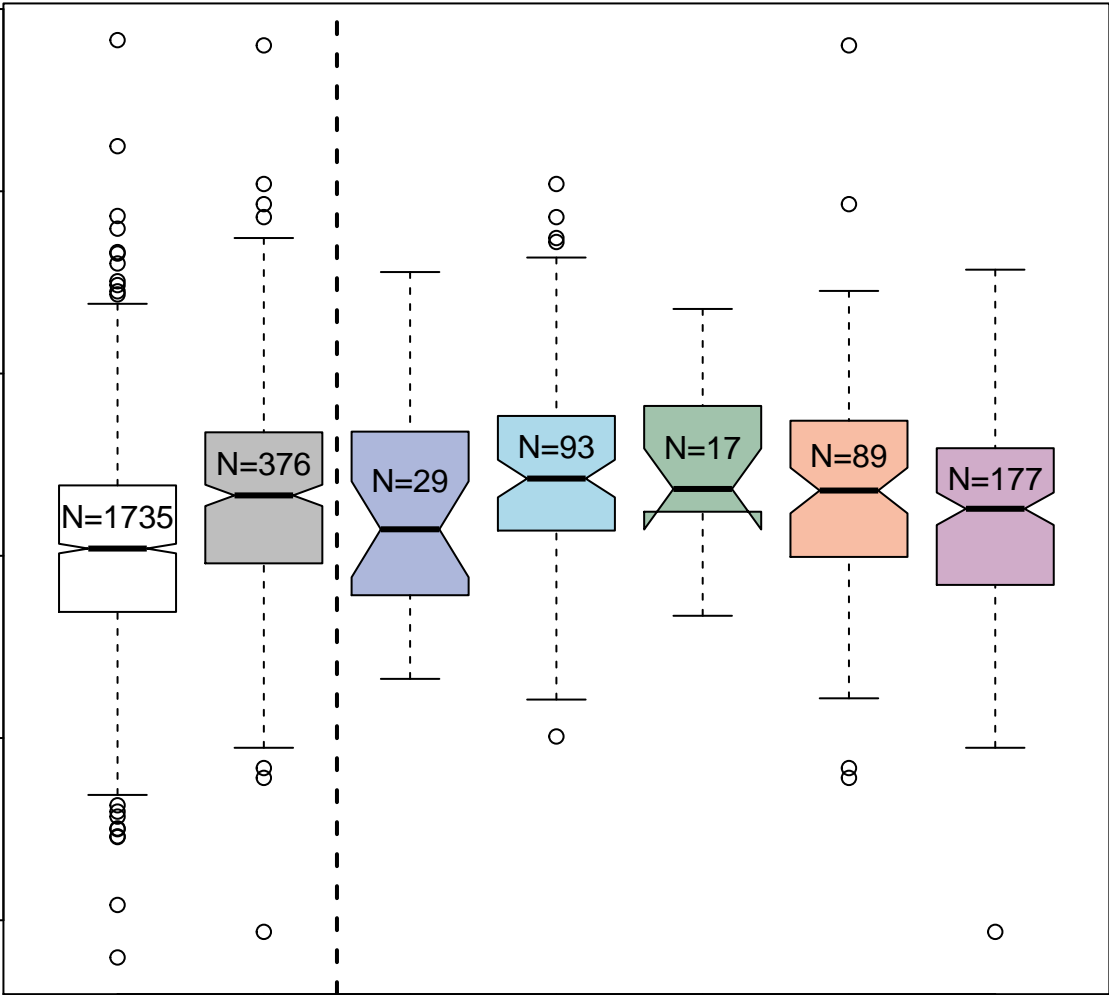

Clusters

13097-11\_3 : Bcl-2-like protein 2

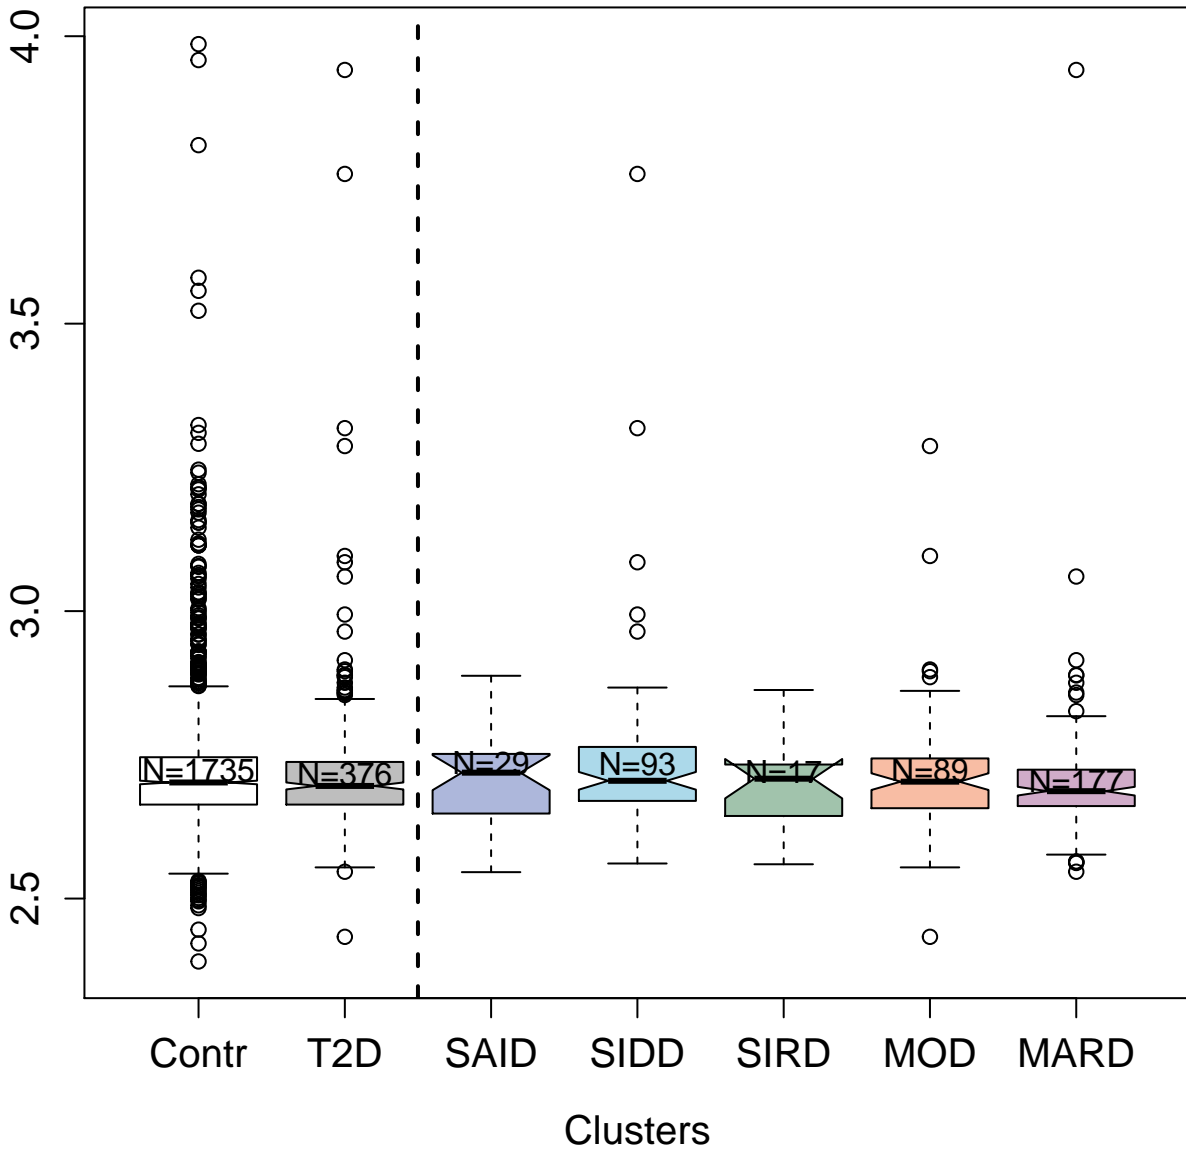



5140-56\_3 : Netrin receptor UNC5D

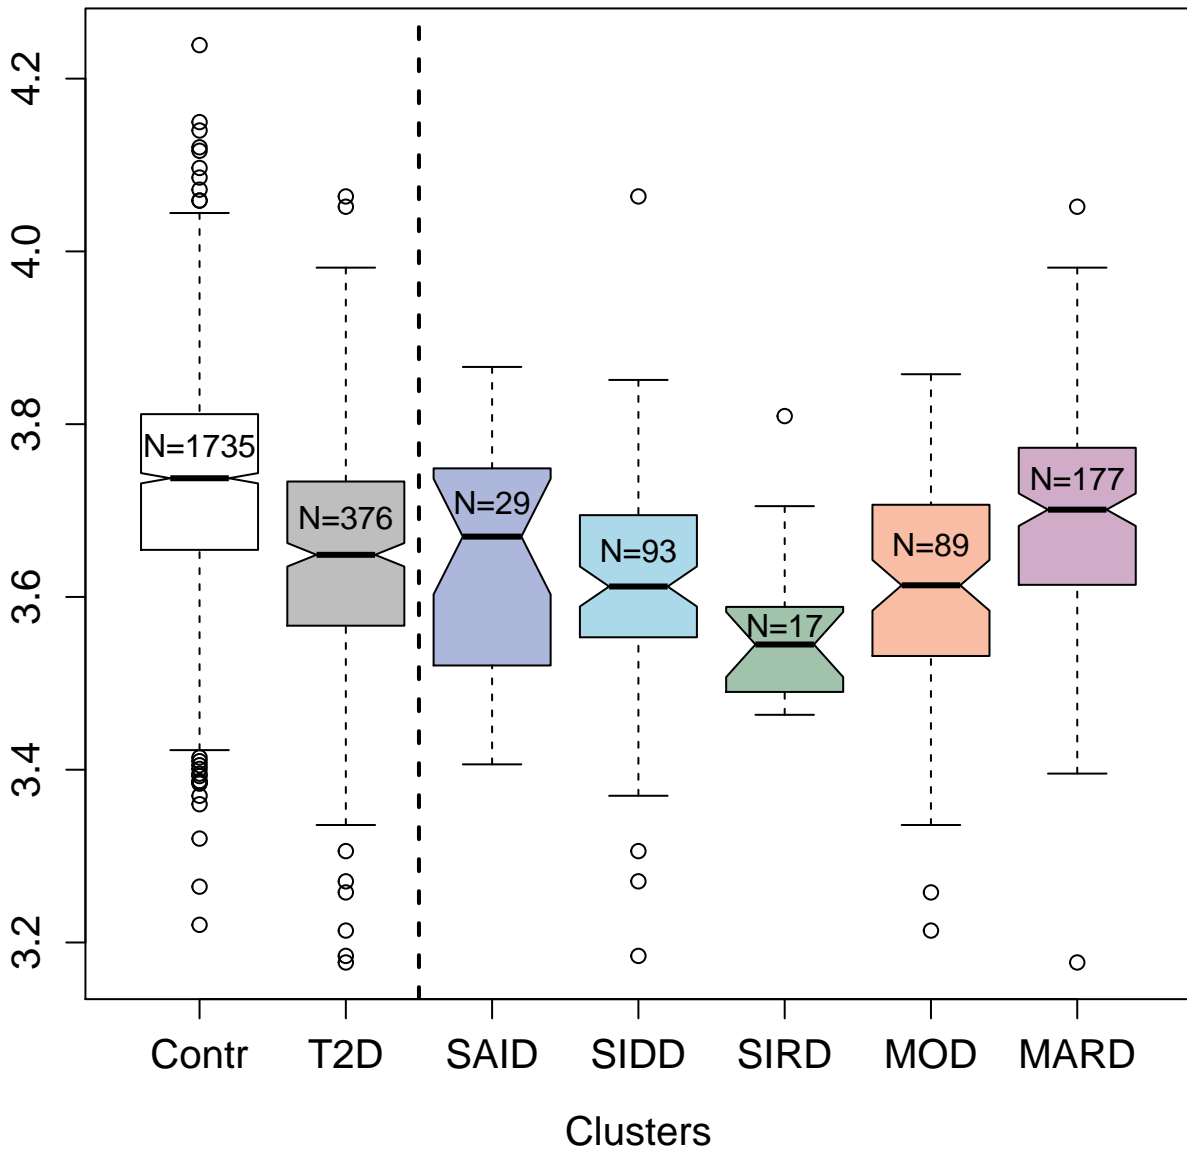

3836-51\_2 : Ubiquitin-fold modifier 1

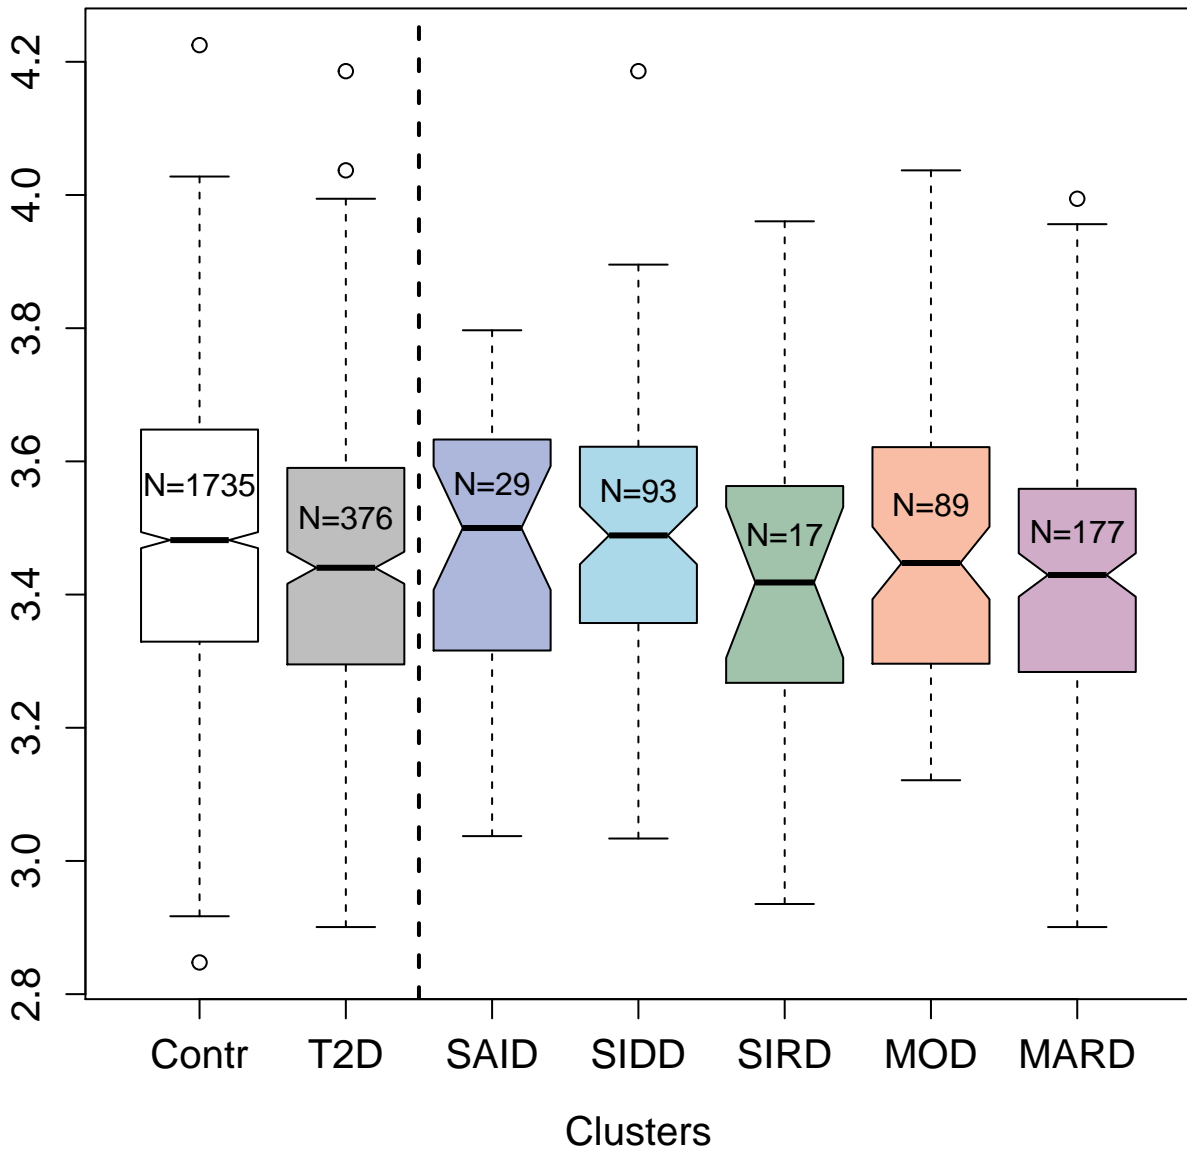

4993-16\_1 : Glutathione S-transferase A3

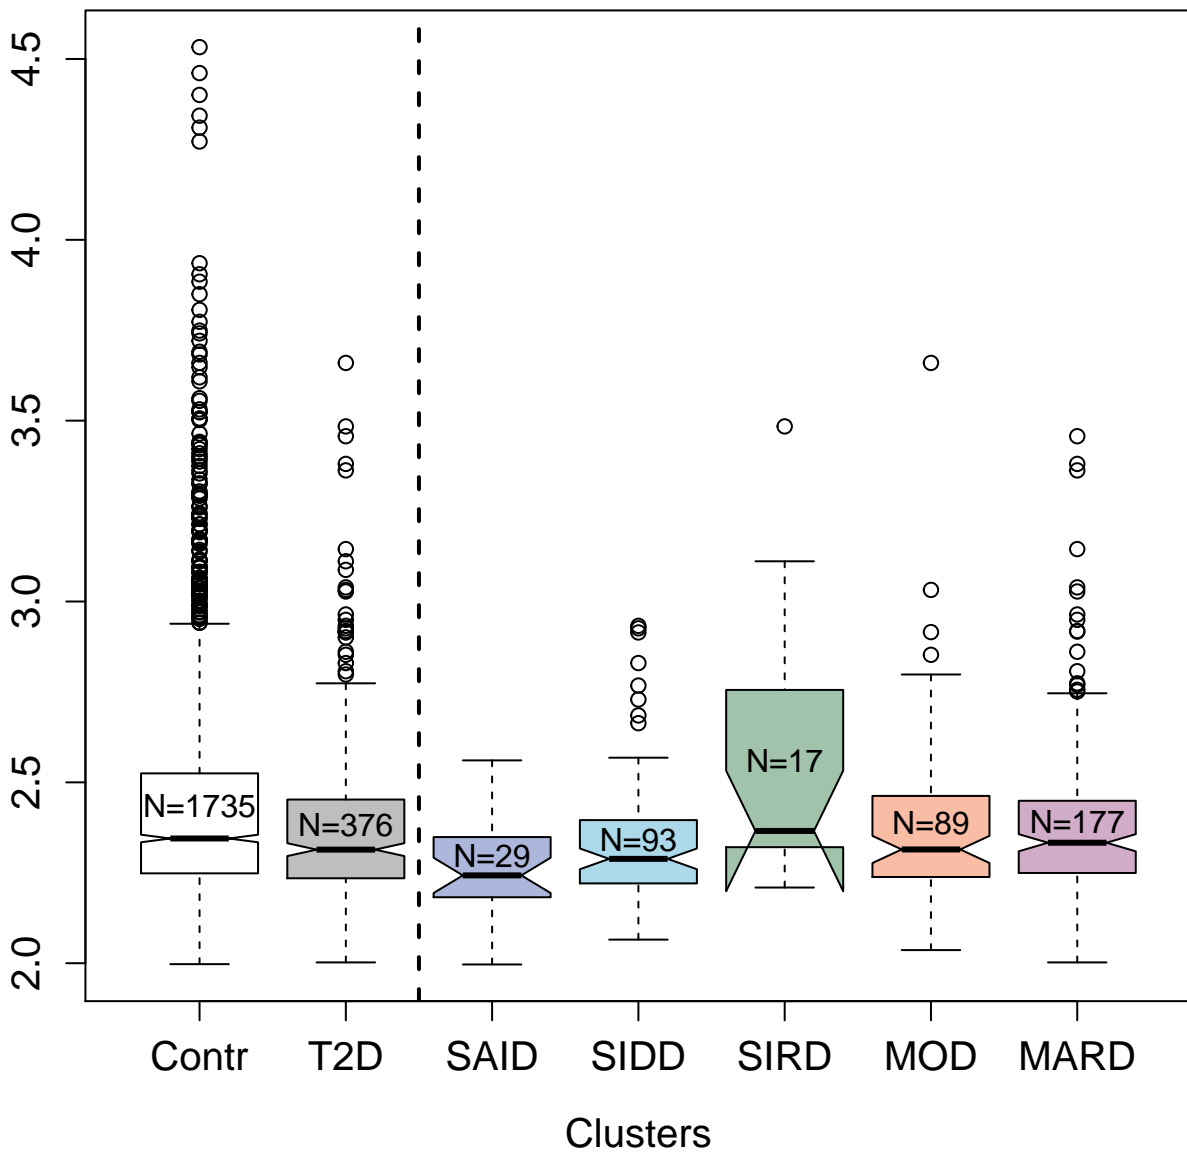

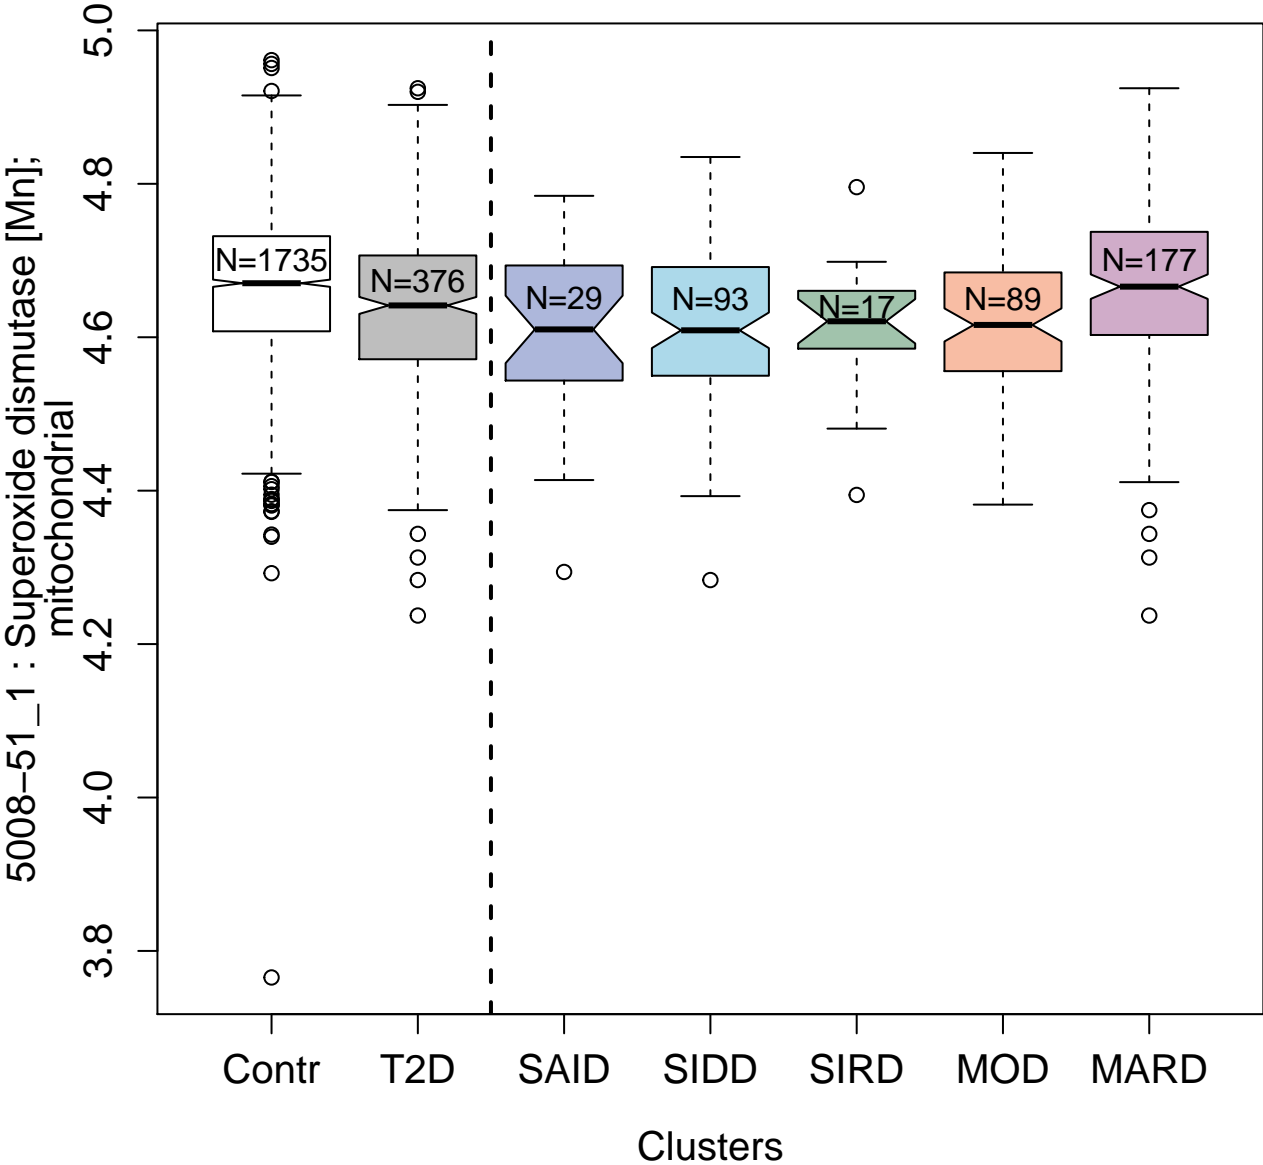

4541-49\_2 : Cell adhesion molecule-related/down-regulated by oncogenes

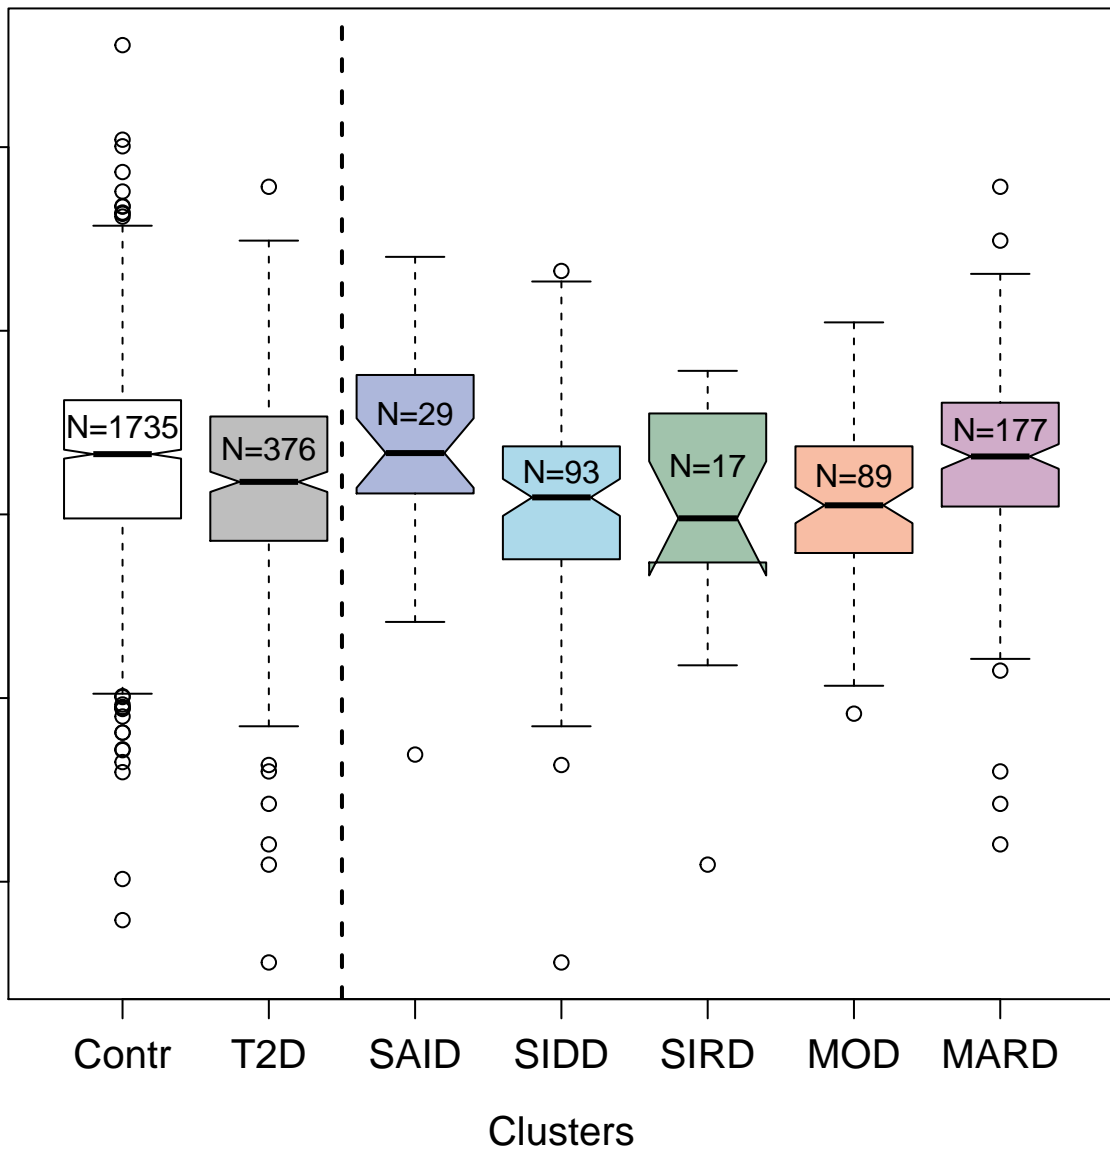

2614-28\_2 : Ephrin-A4

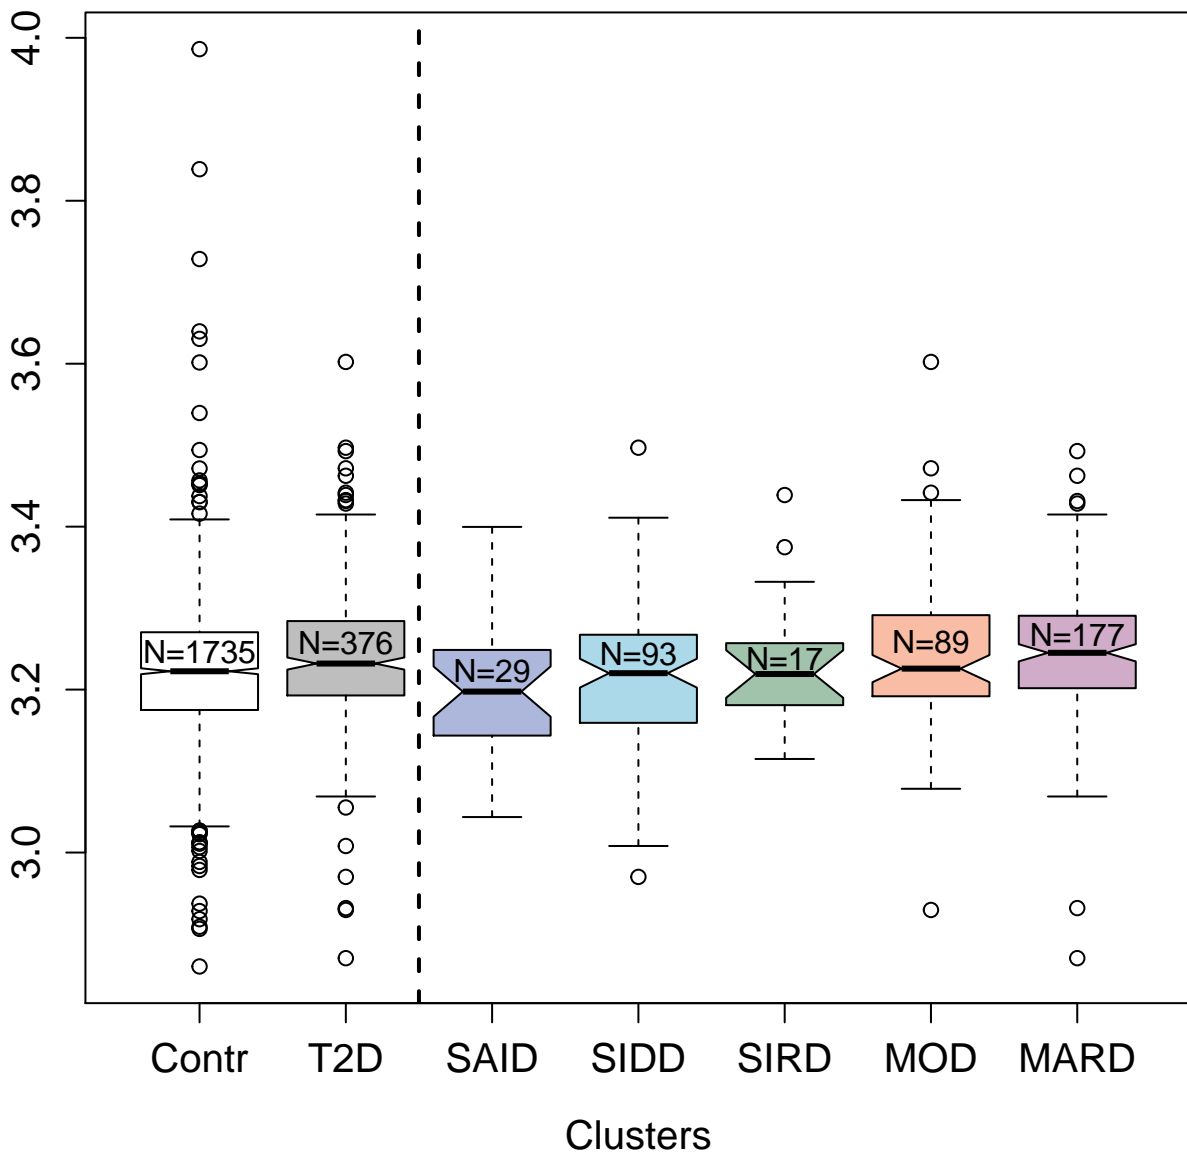

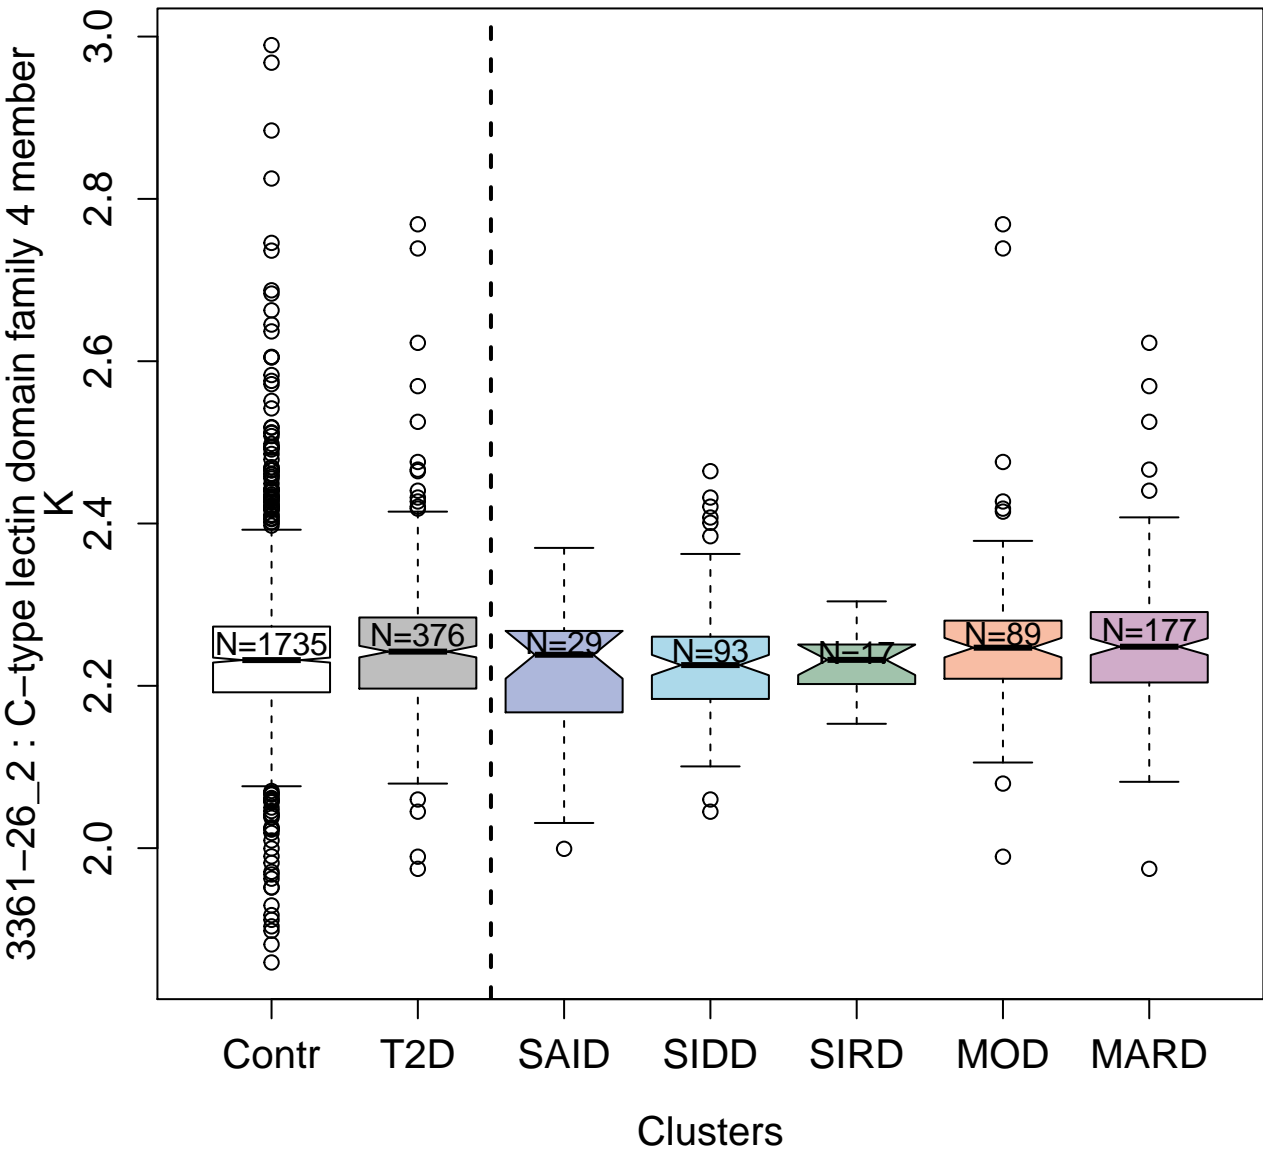

4706-17\_2 : Protein 4.1

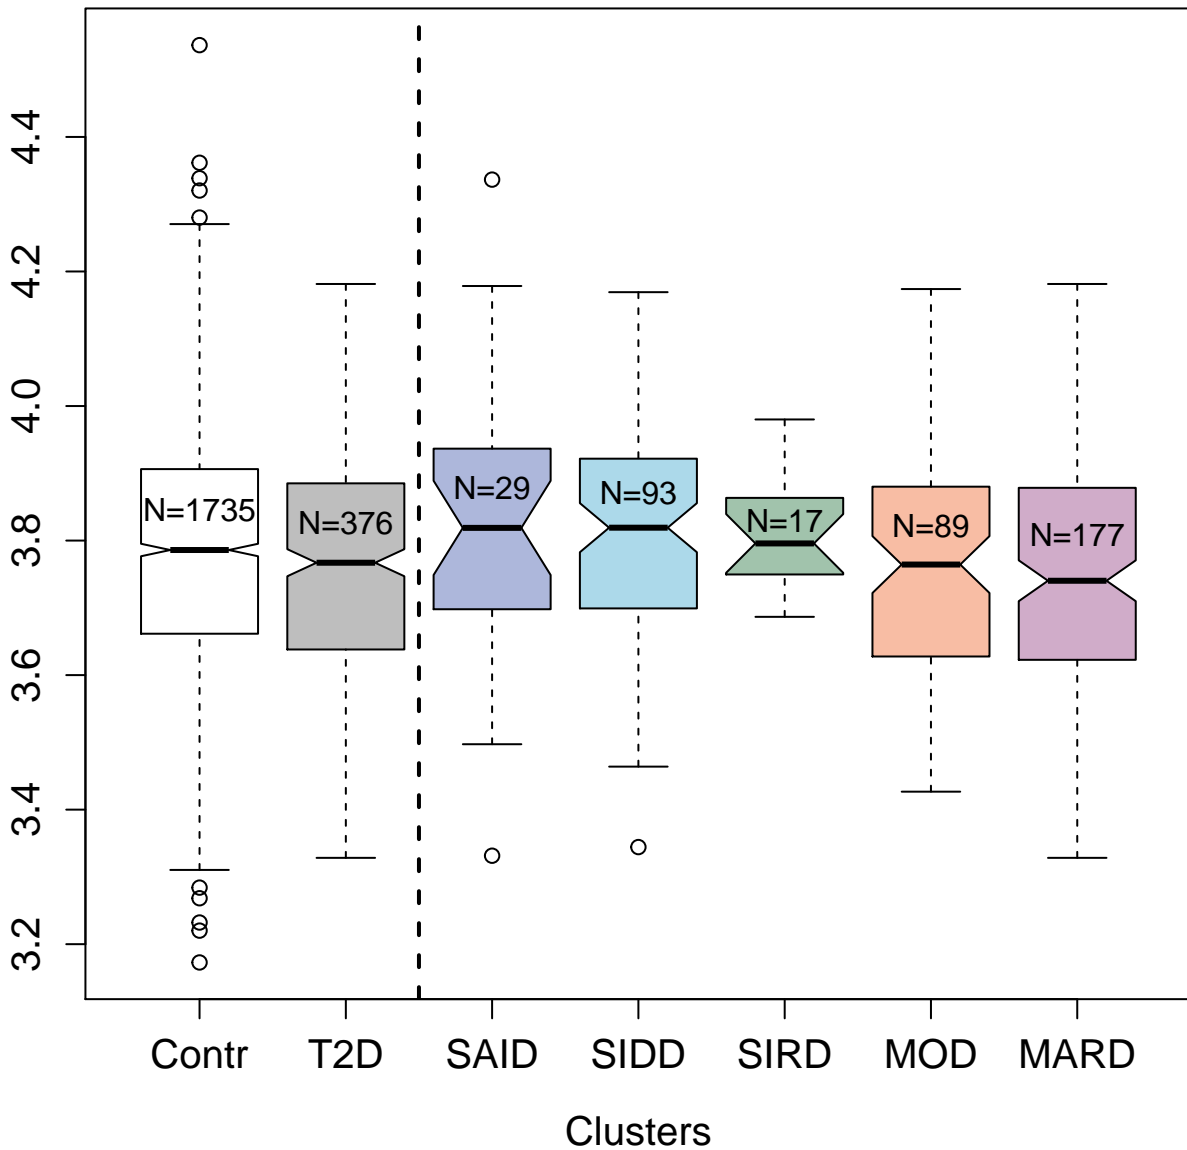



8458-111\_3 : Alpha-synuclein

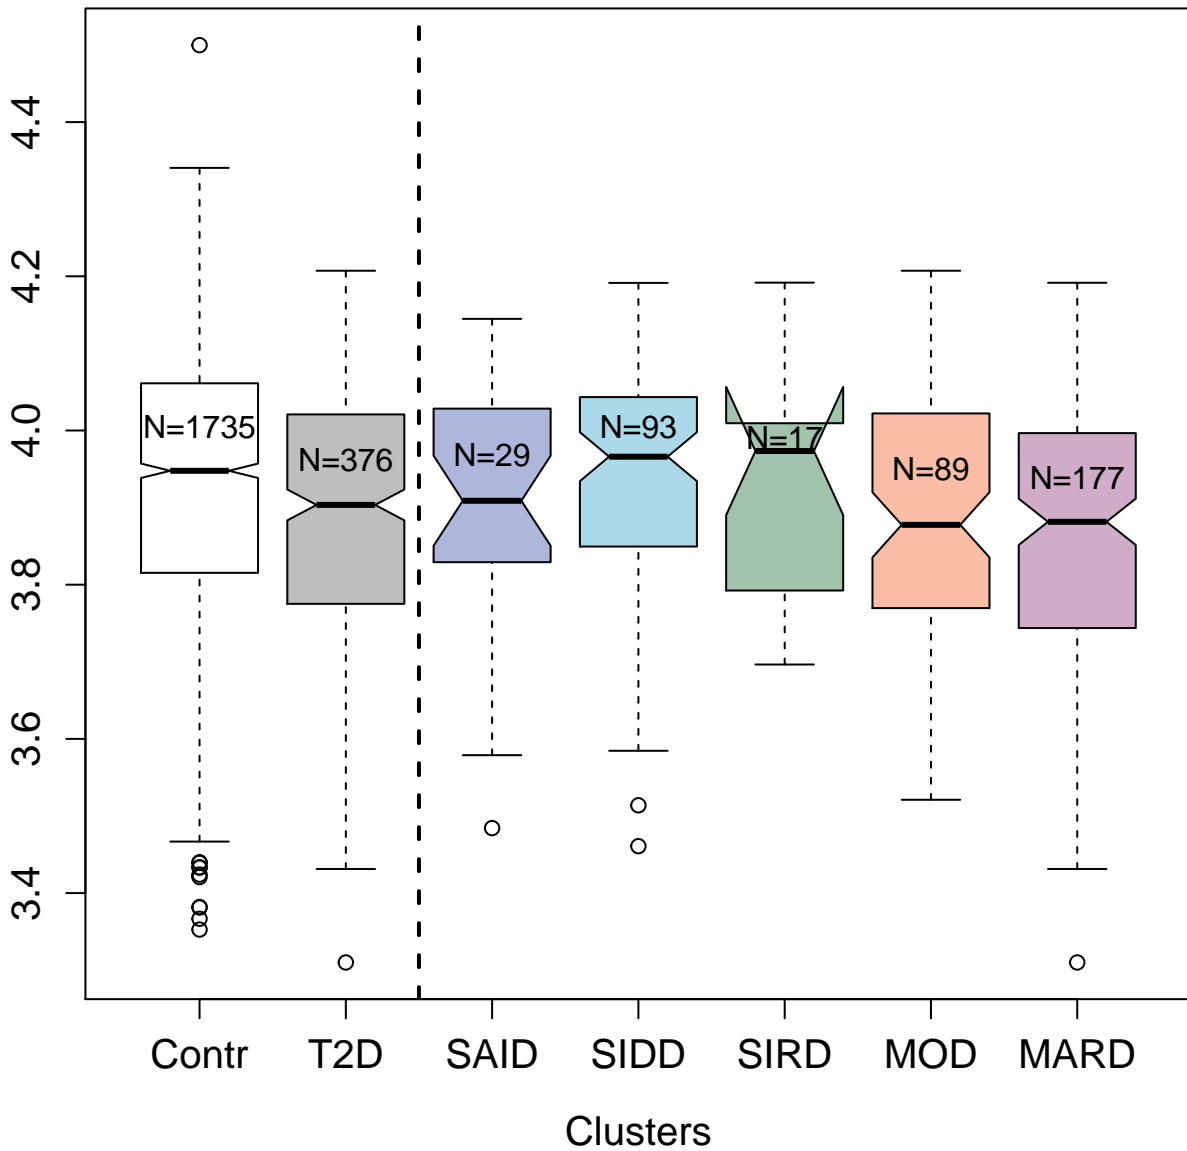

5489-18\_3 : Stress-induced-phosphoprotein 1

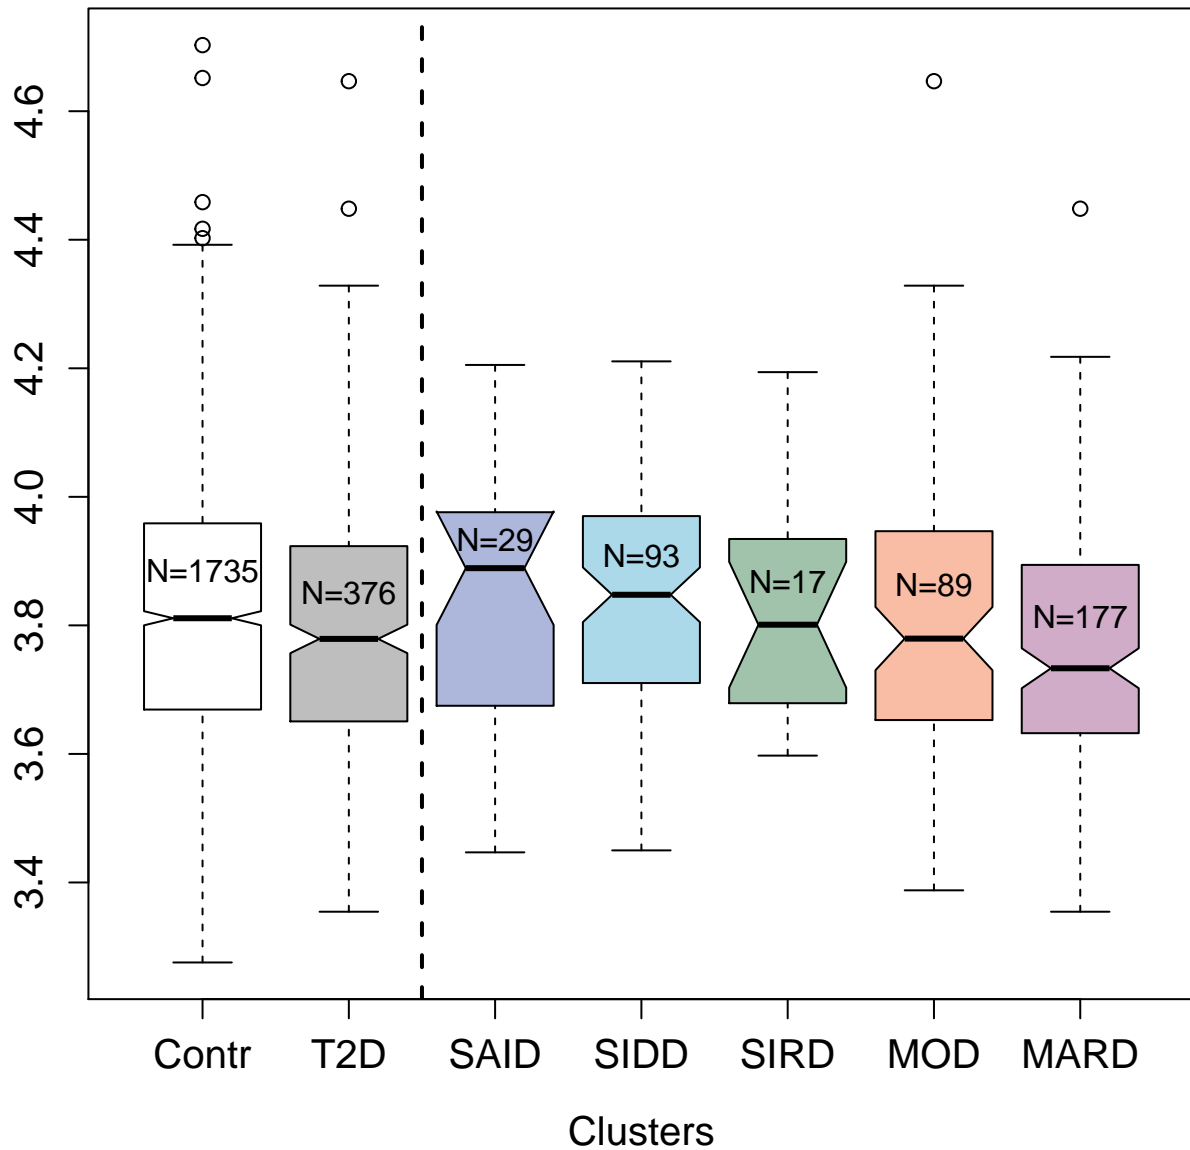

4453-83\_3 : Leucine-rich repeat transmembrane neuronal protein 3

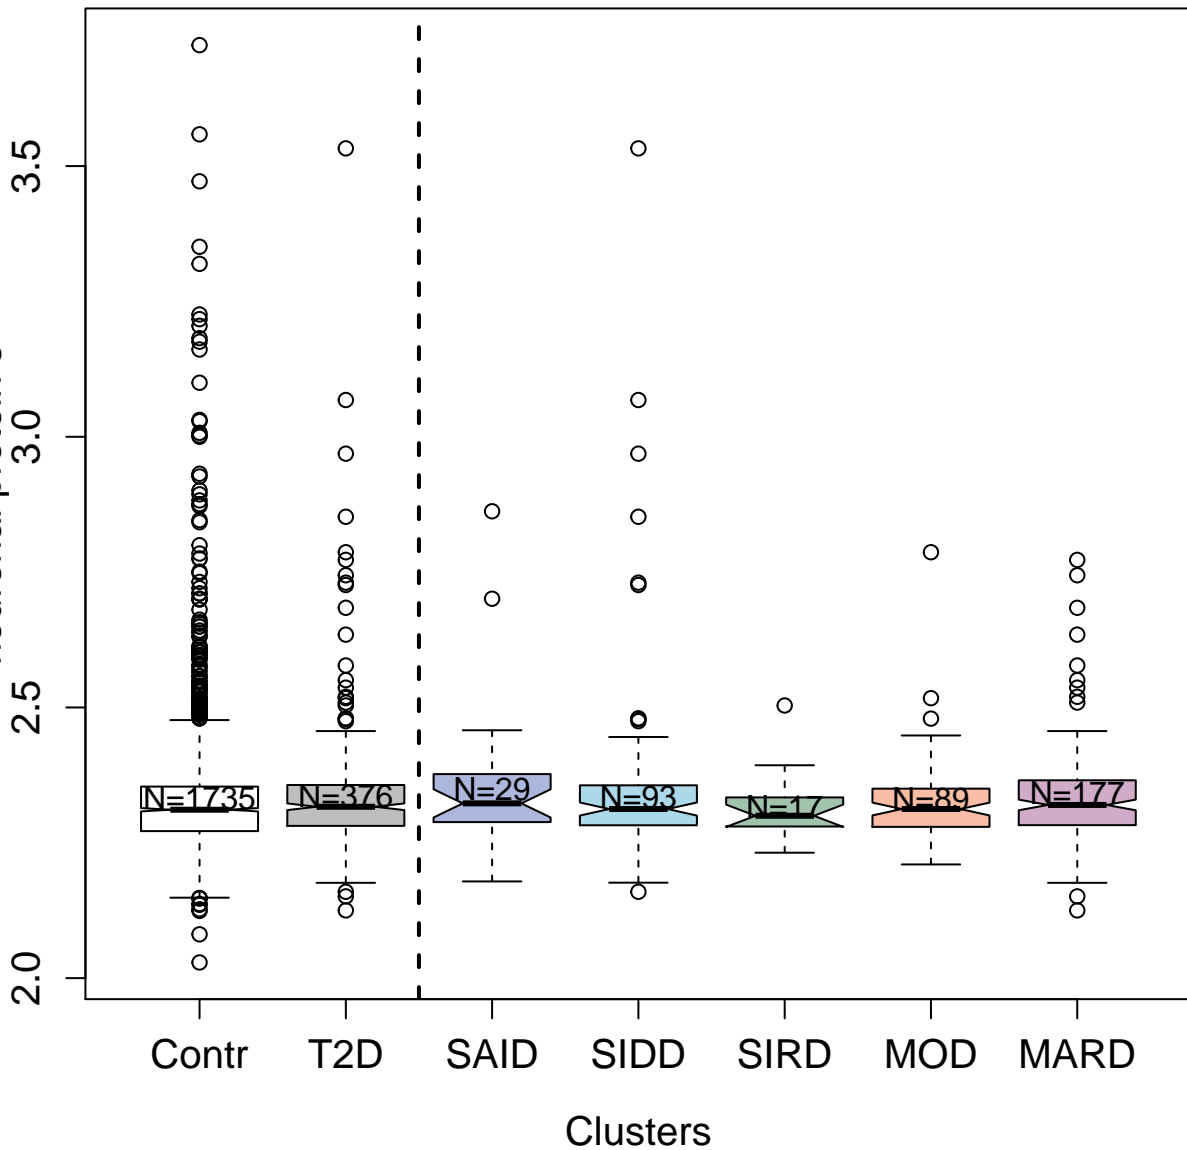

3397-7\_4 : Tyrosine-protein phosphatase  
non-receptor type 11

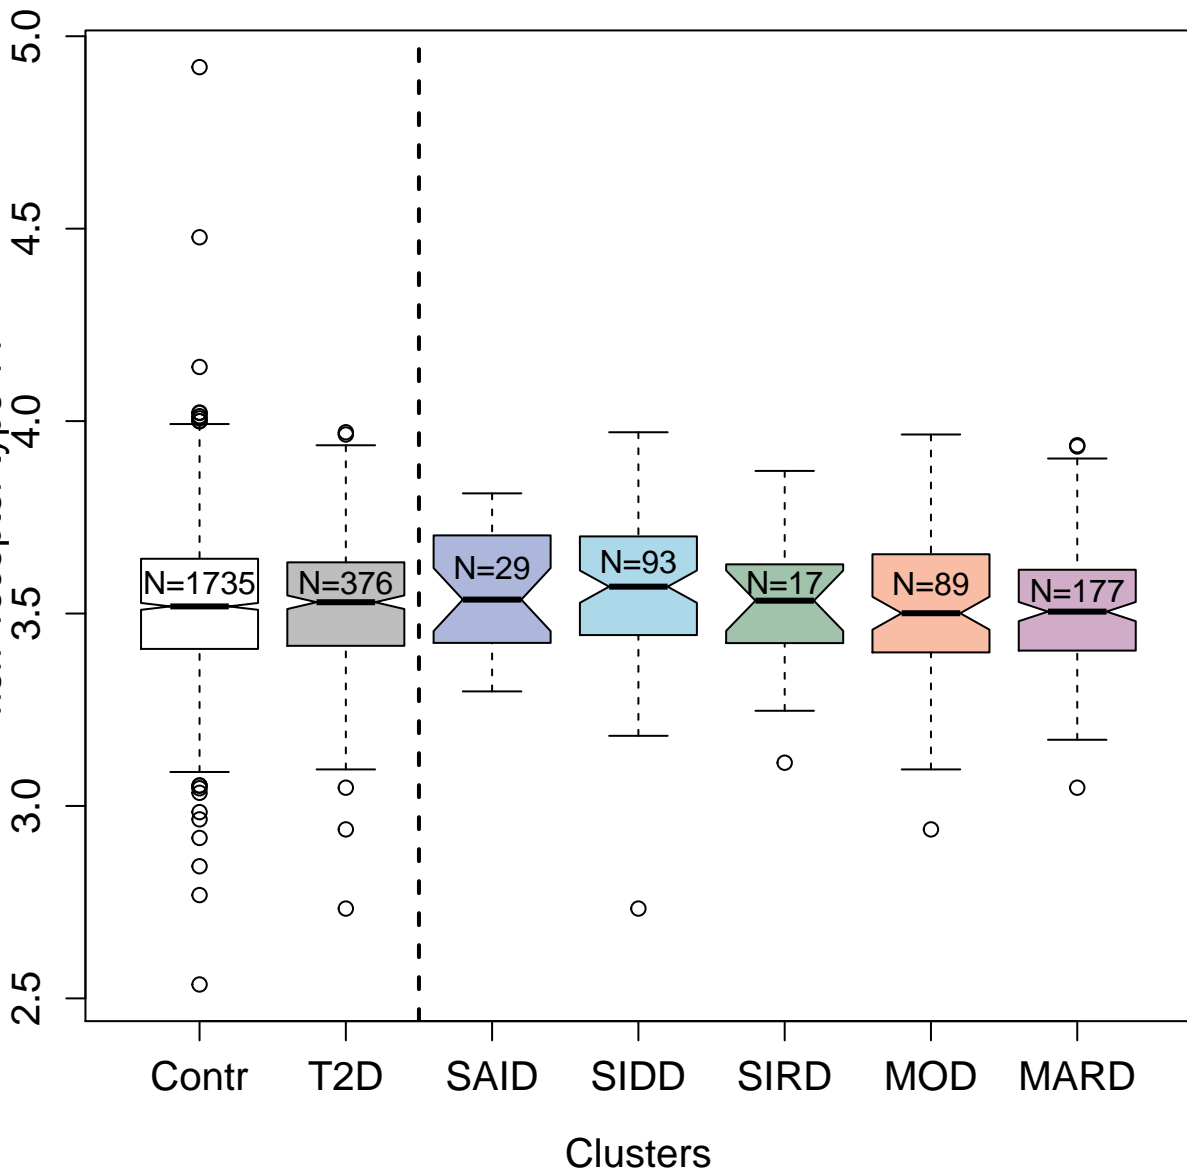

5225-50\_3 : Casein kinase II 2-alpha:2-beta heterotetramer

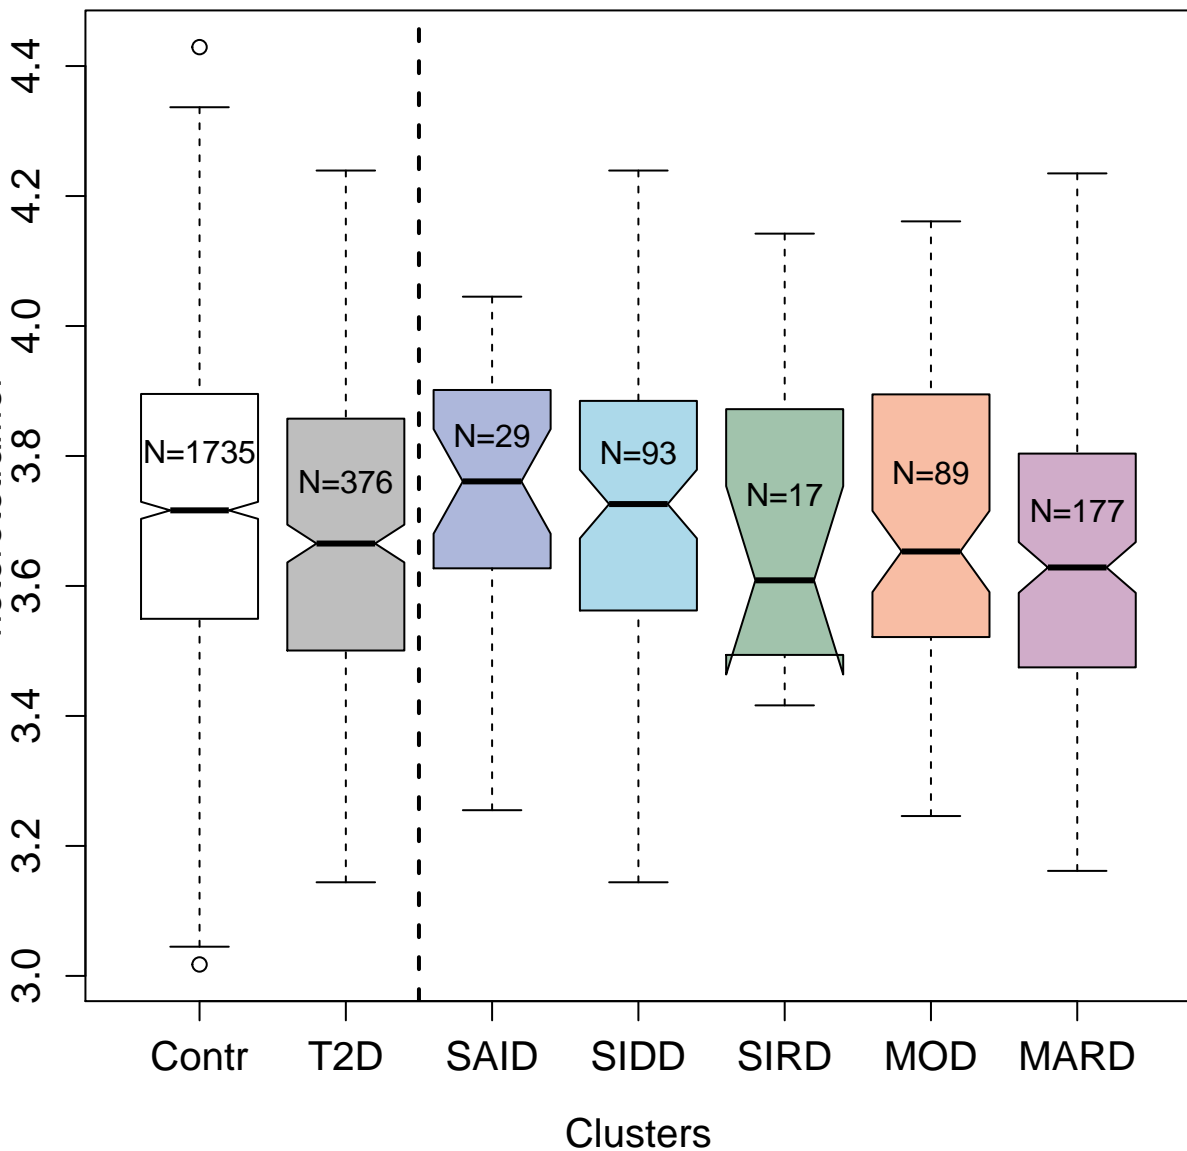

4309-59\_3 : Triosephosphate isomerase

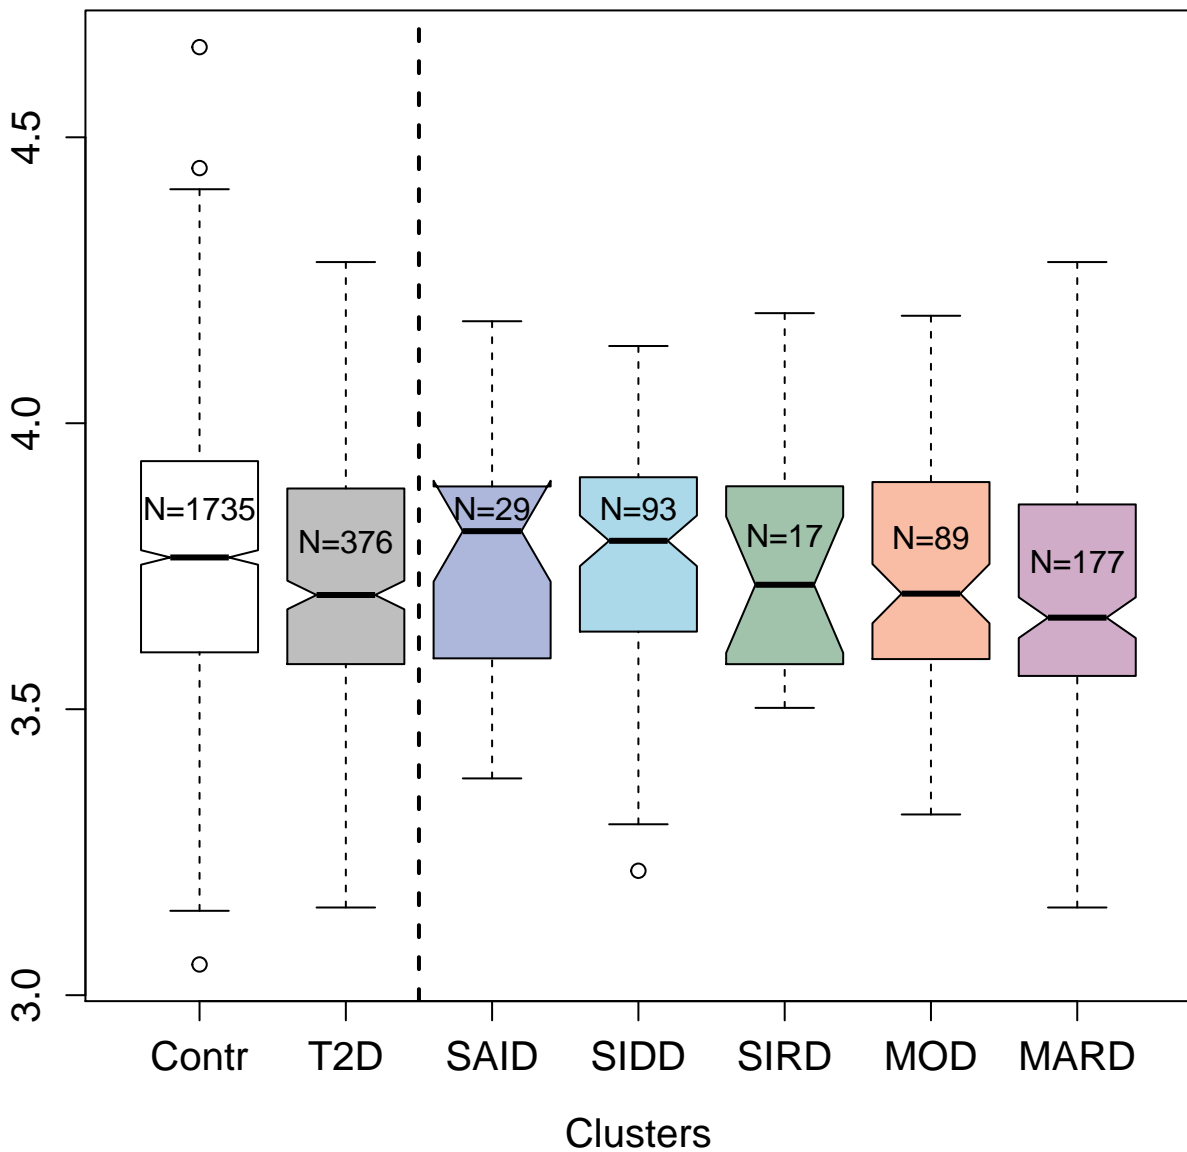

5245-40\_5 : AMP Kinase (alpha2beta2gamma1)

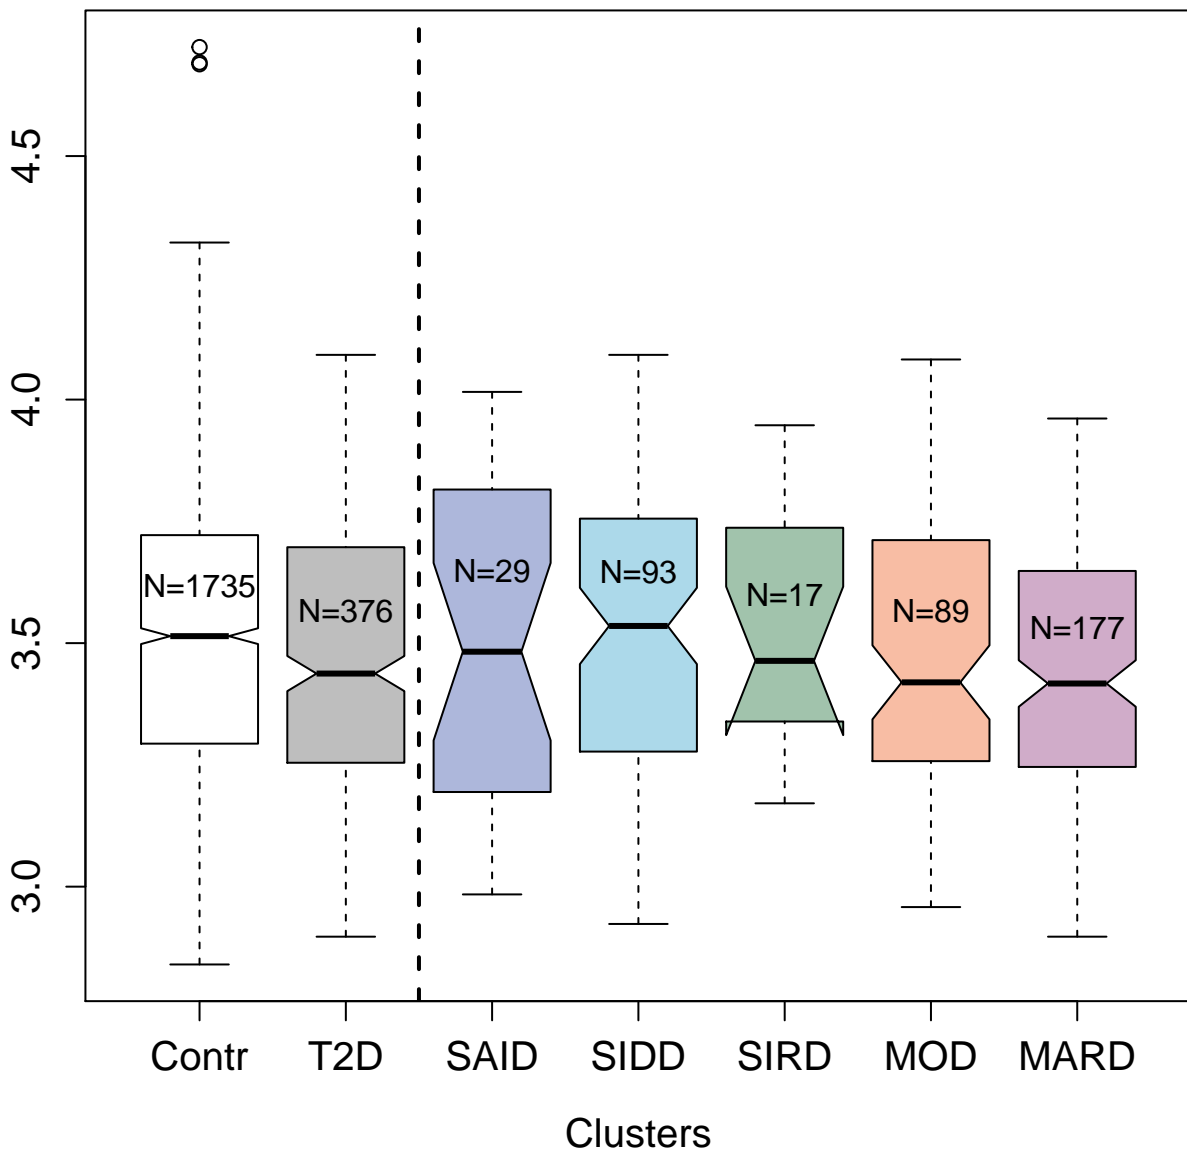

4867-15\_2 : Vascular endothelial growth factor A;  
isoform 121

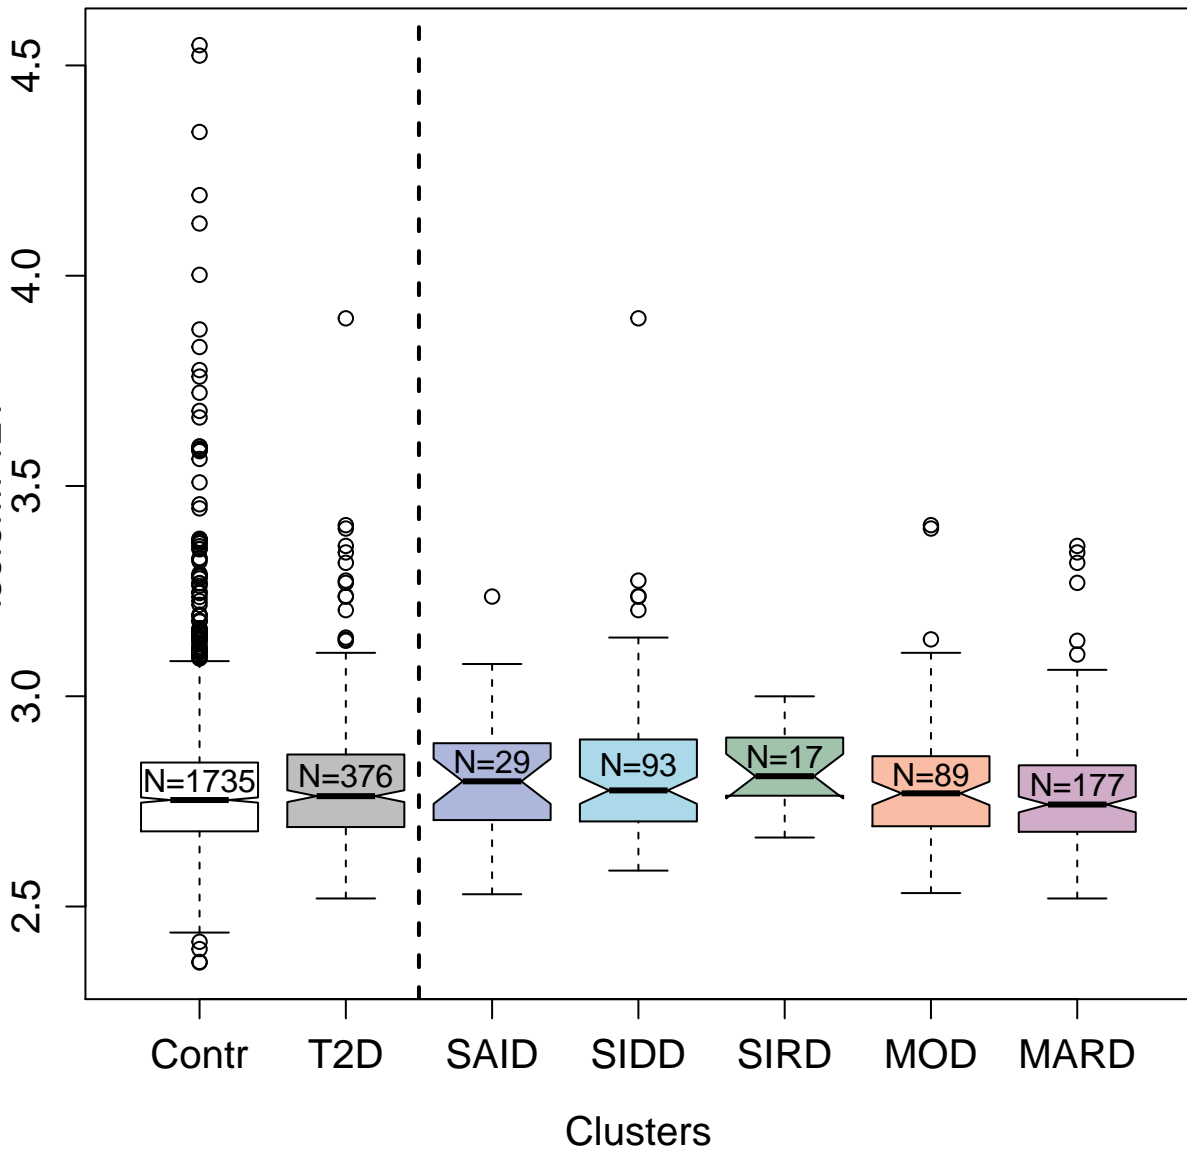



4209-60\_2 : Vacuolar protein sorting-associated protein VTA1 homolog

3.5  
4.0  
4.5

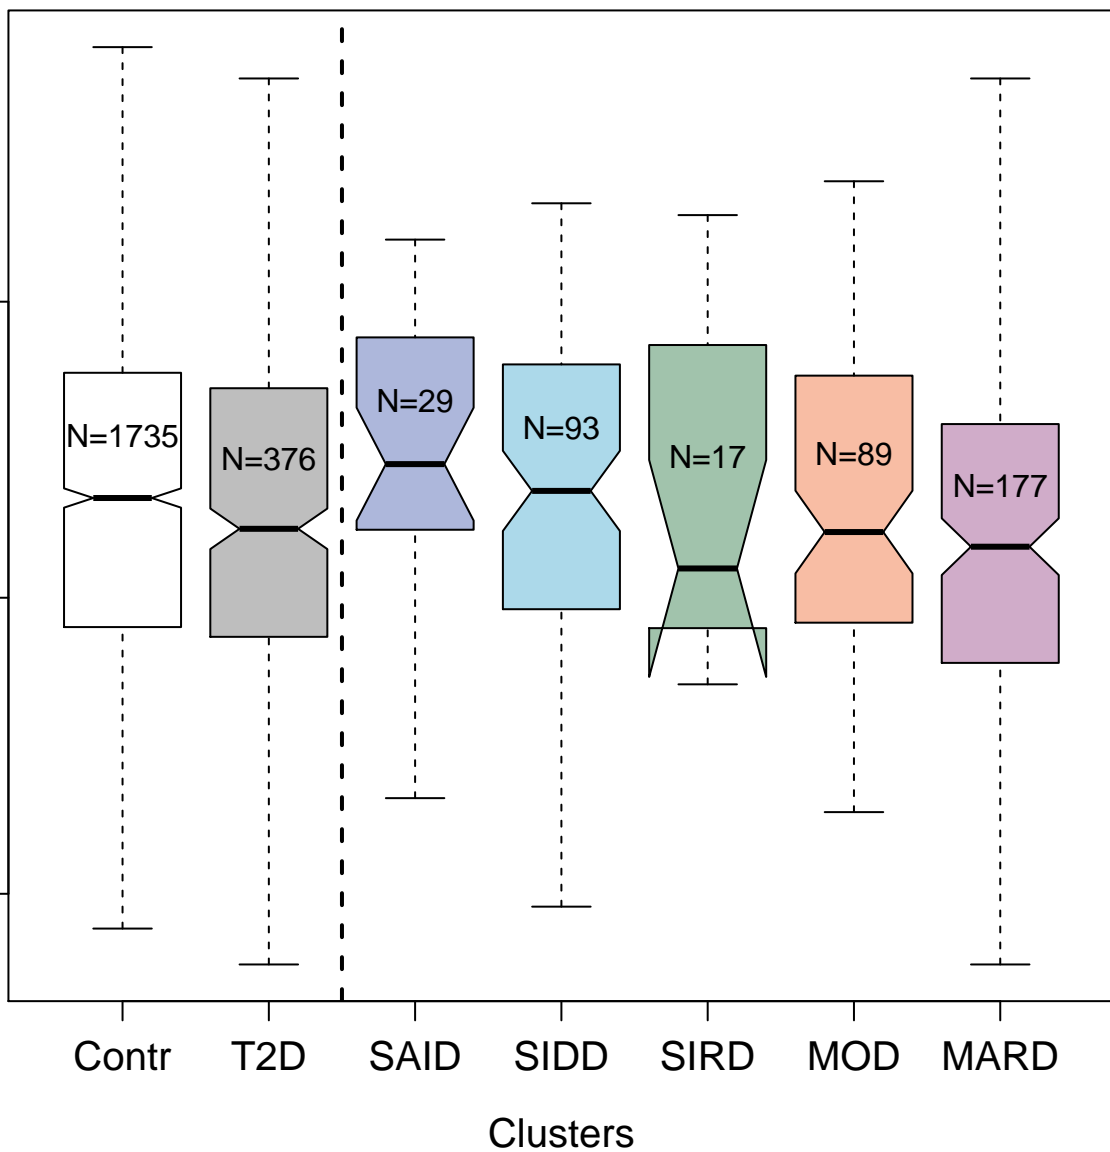

3177-49\_2 : Carbonic anhydrase 4

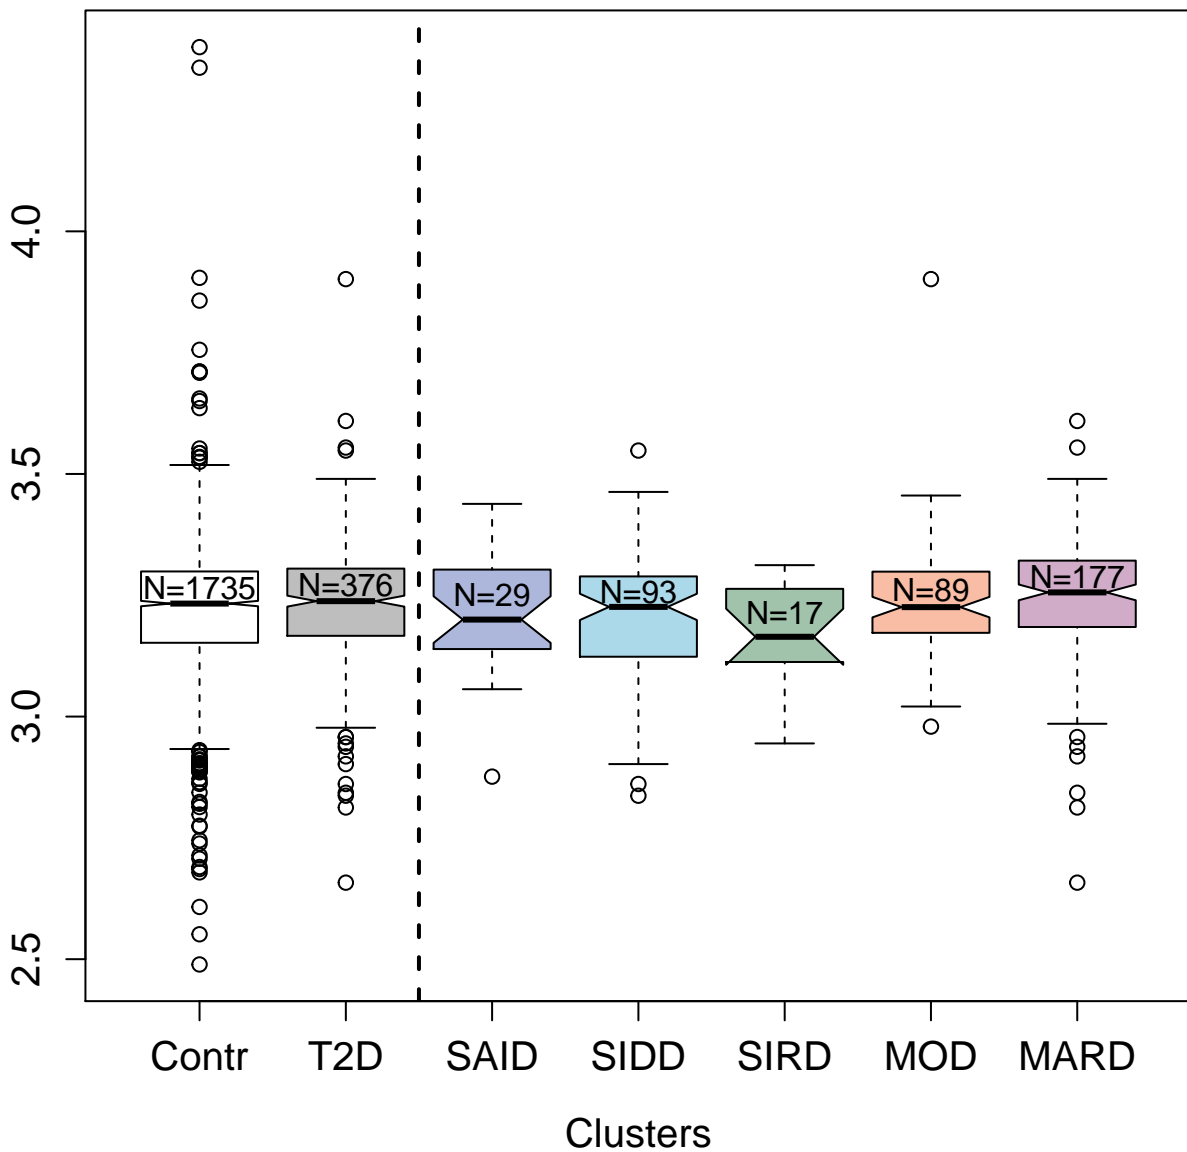

2970-60\_2 : Amphiregulin

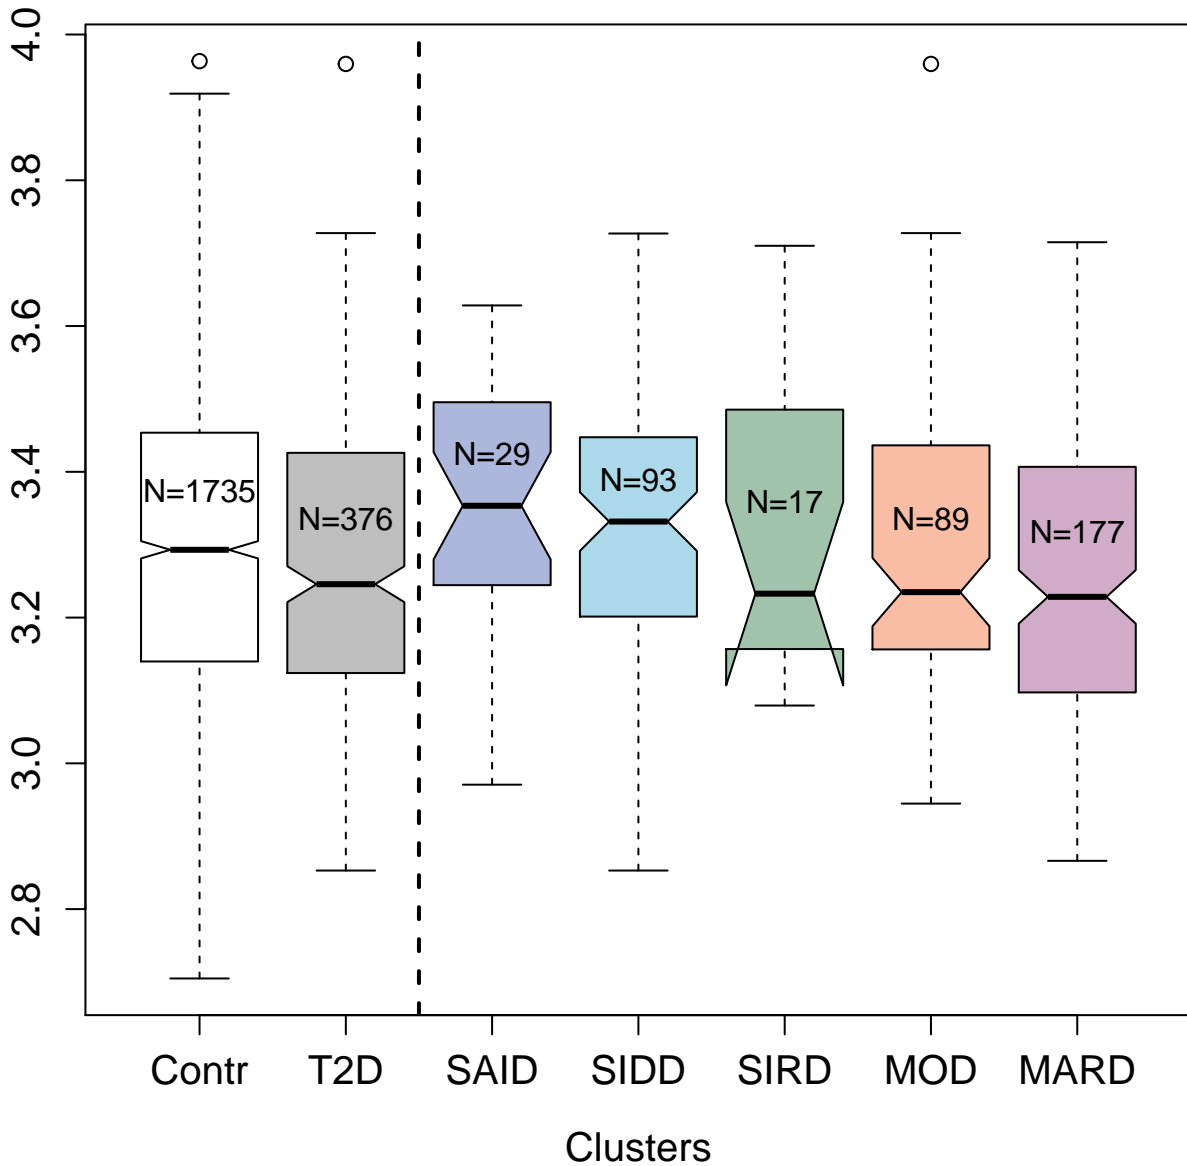

10365-132\_3 : Interleukin-23

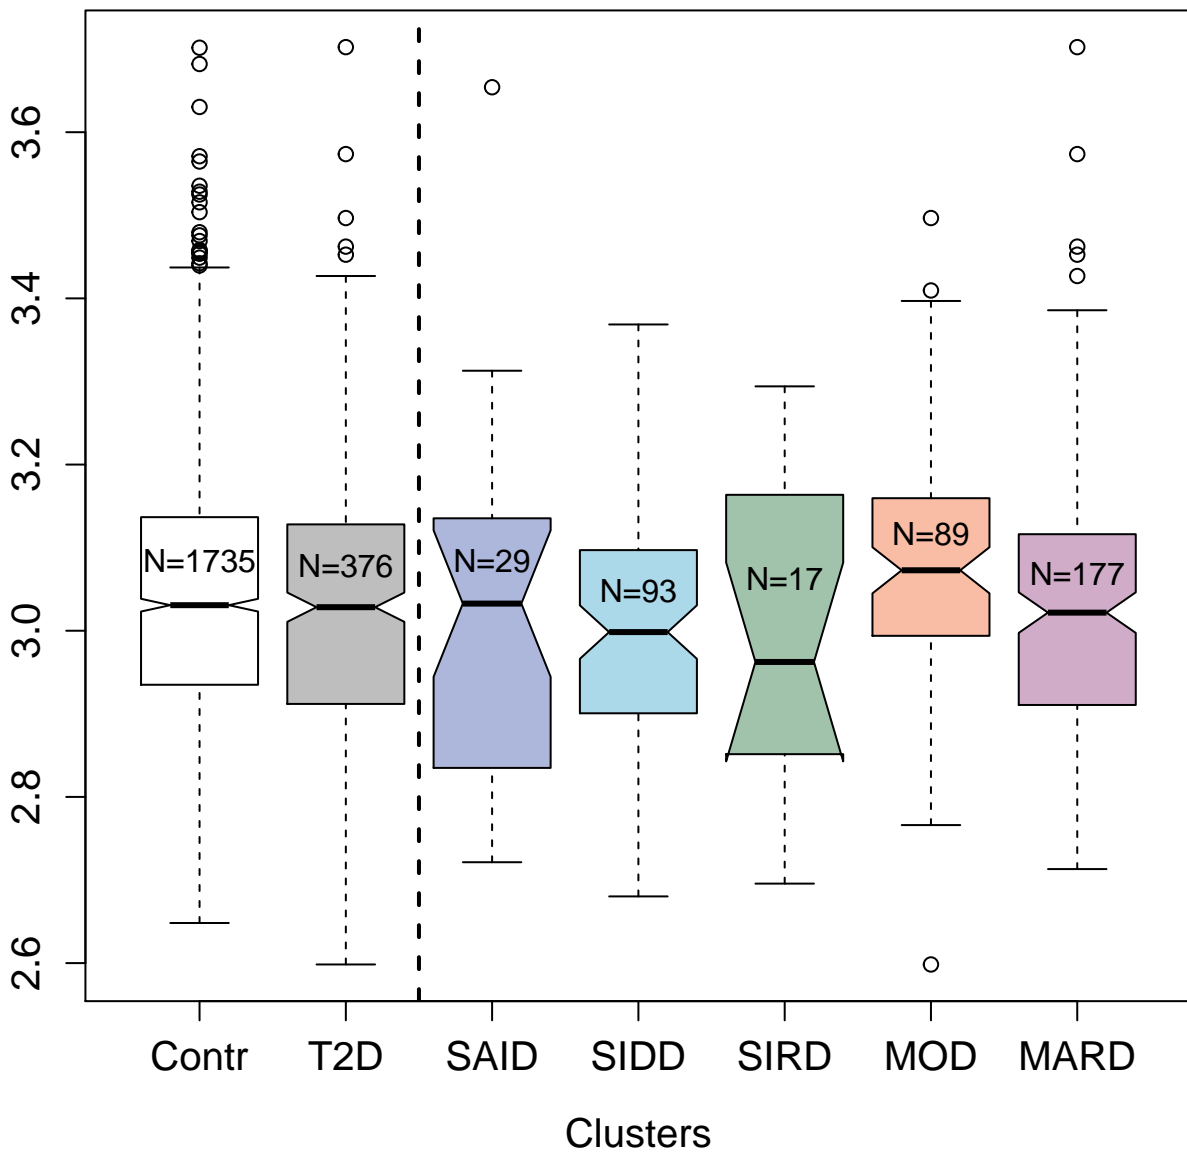

4240-31\_2 : Pyruvate kinase PKM

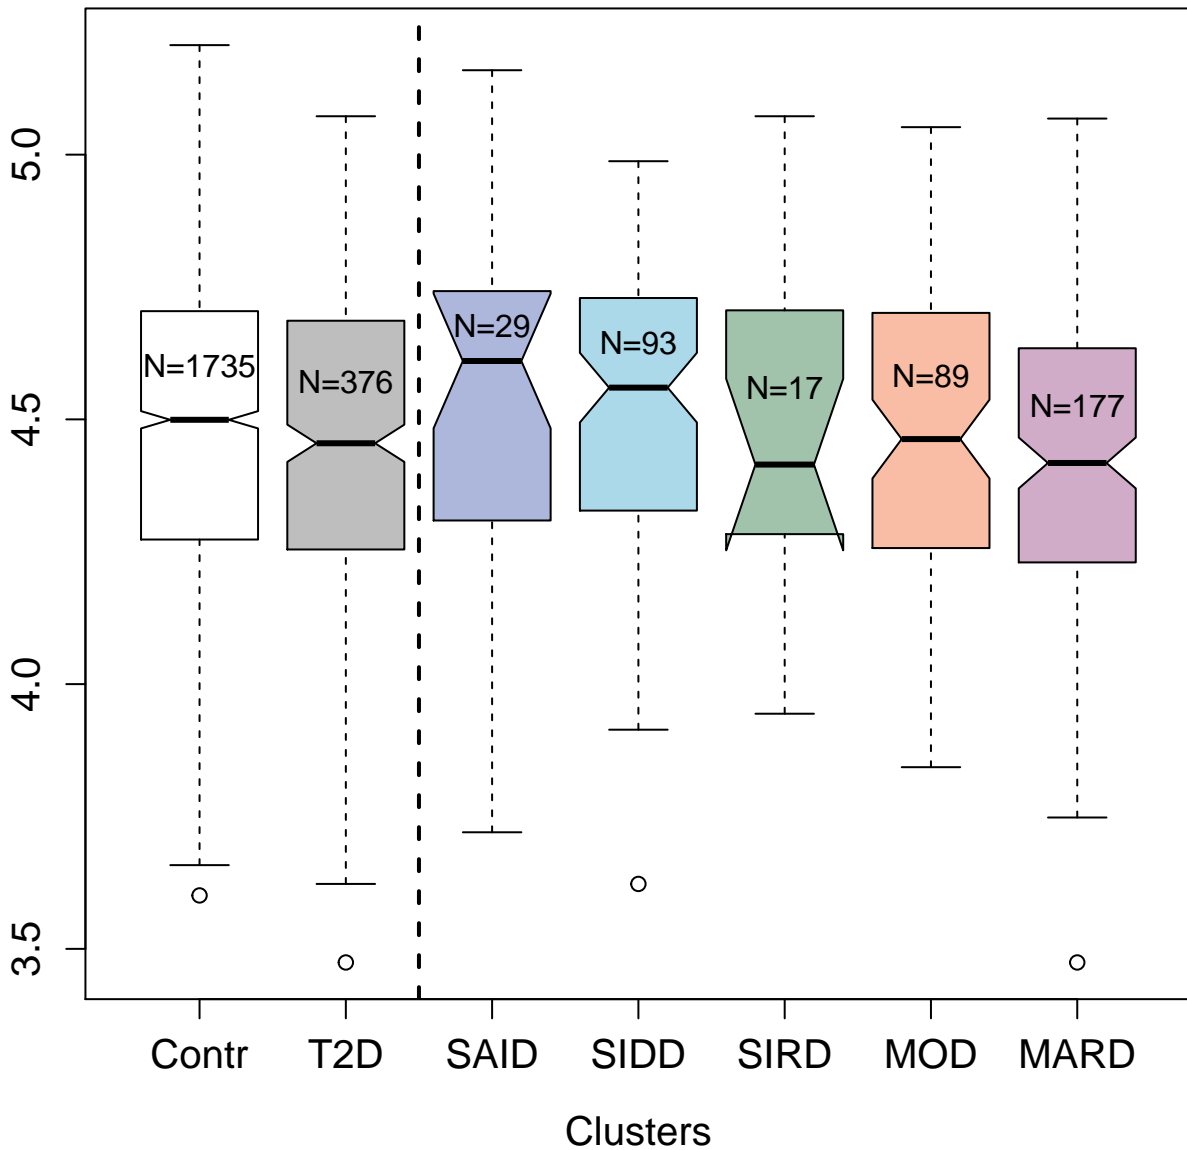

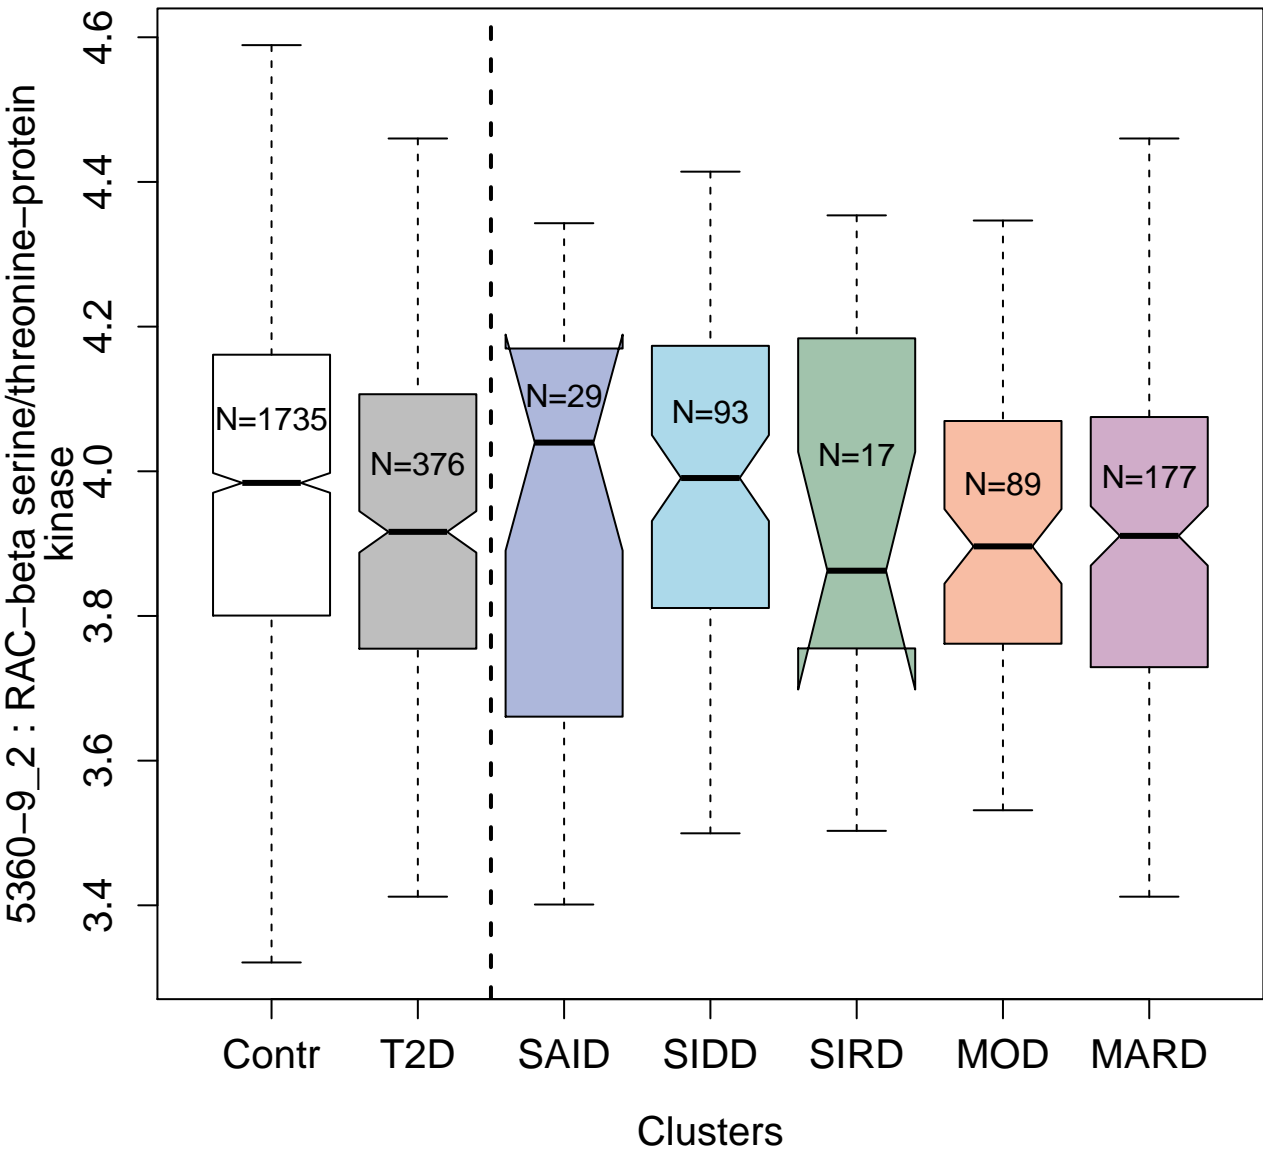

5080-131\_3 : Transmembrane glycoprotein NMB

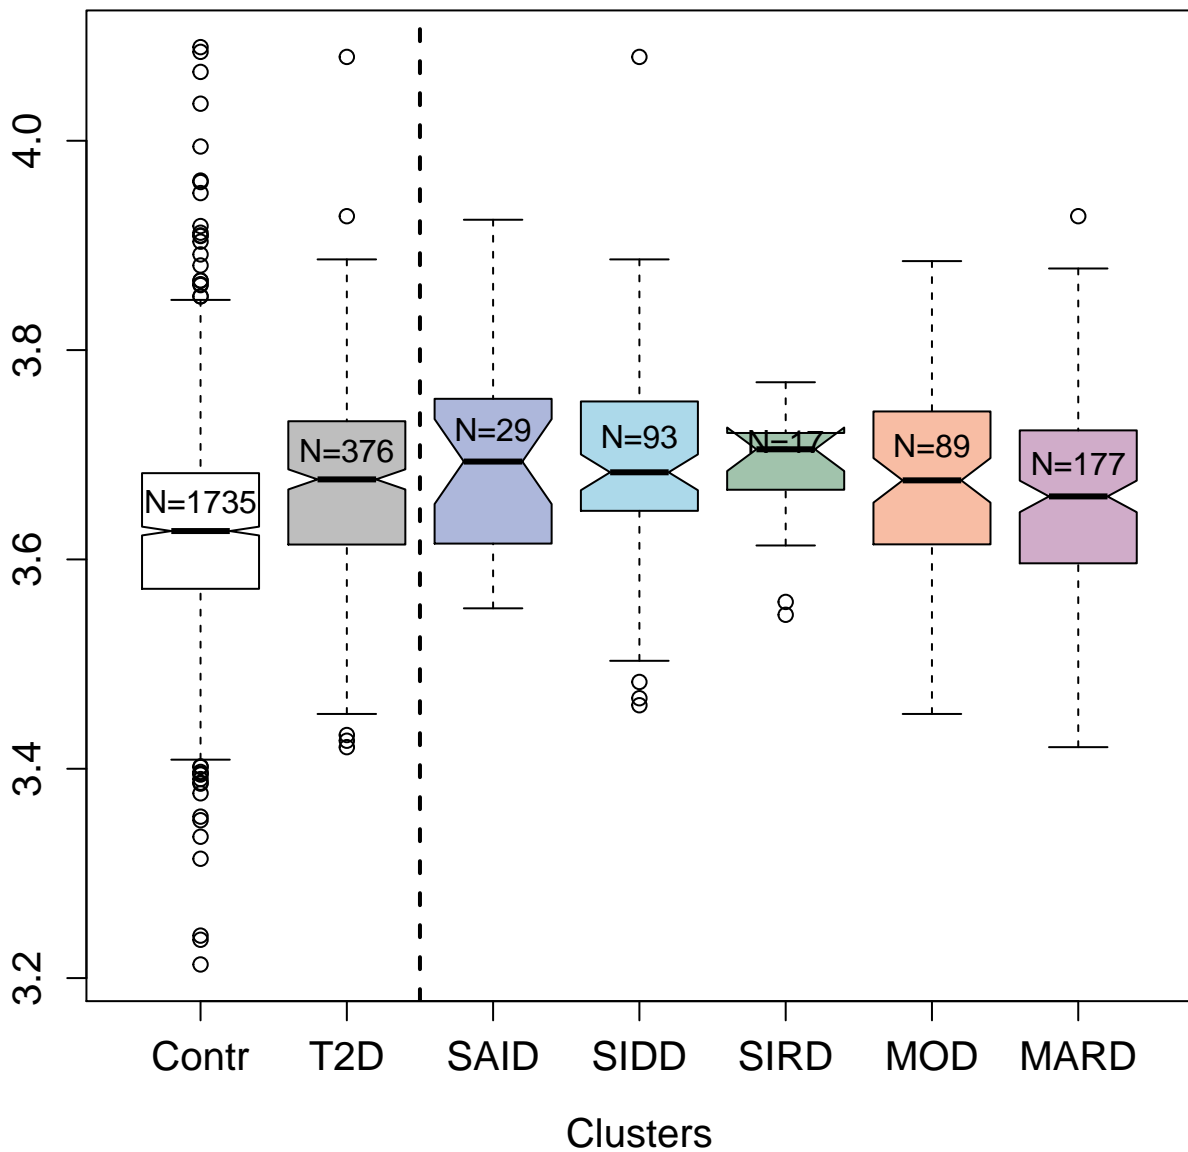

3872-2\_1 : Translationally-controlled tumor

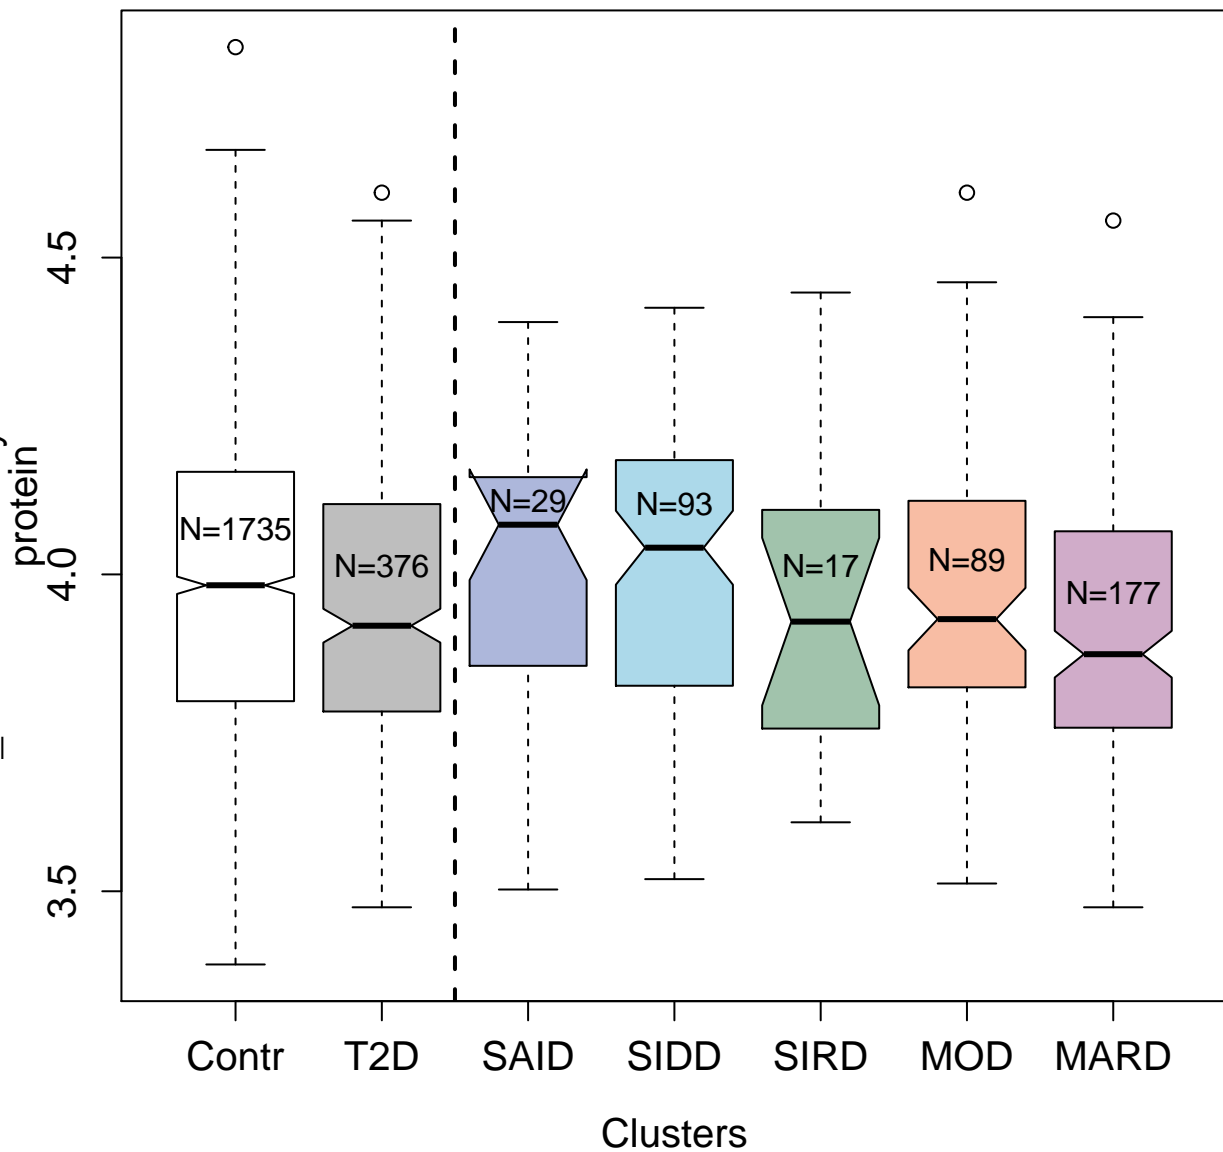



2697-7\_2 : Platelet factor 4

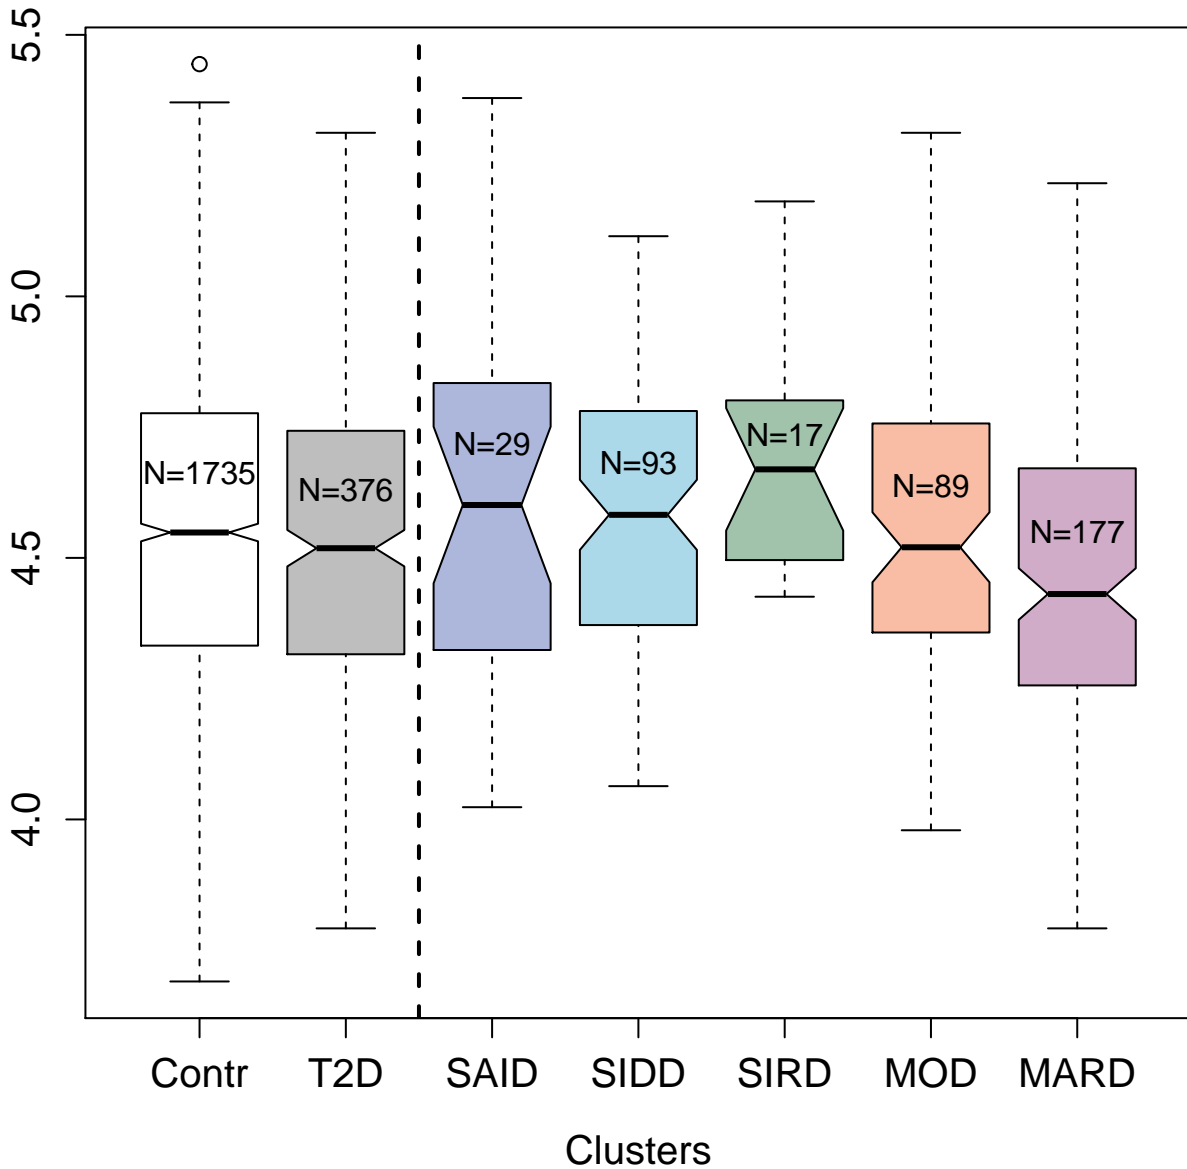

2381-52\_4 : Complement C5

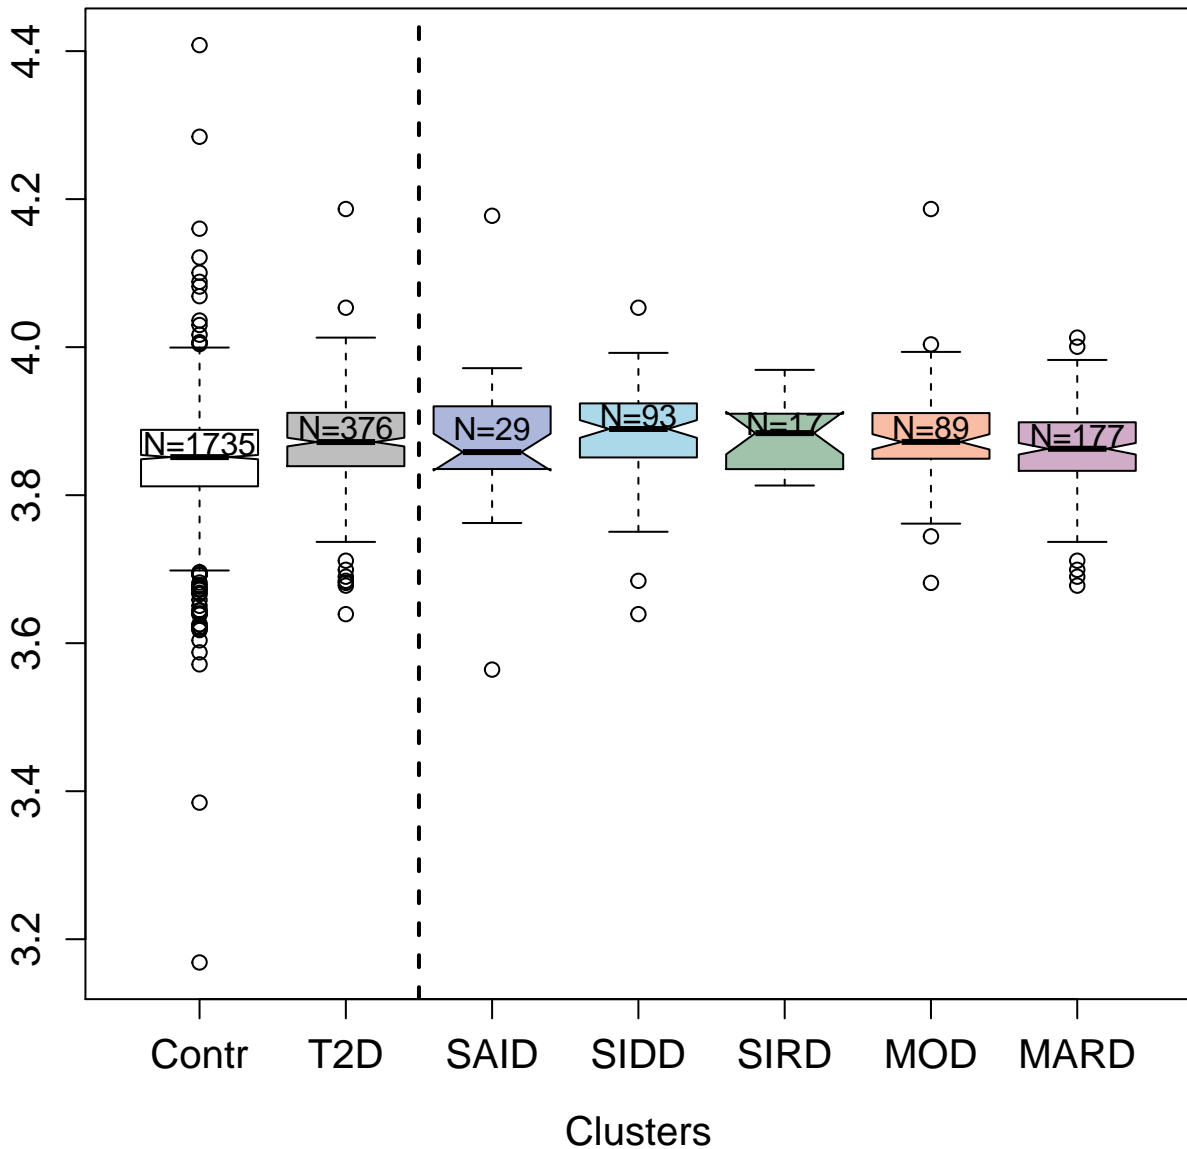

3504-58\_2 : Hepcidin

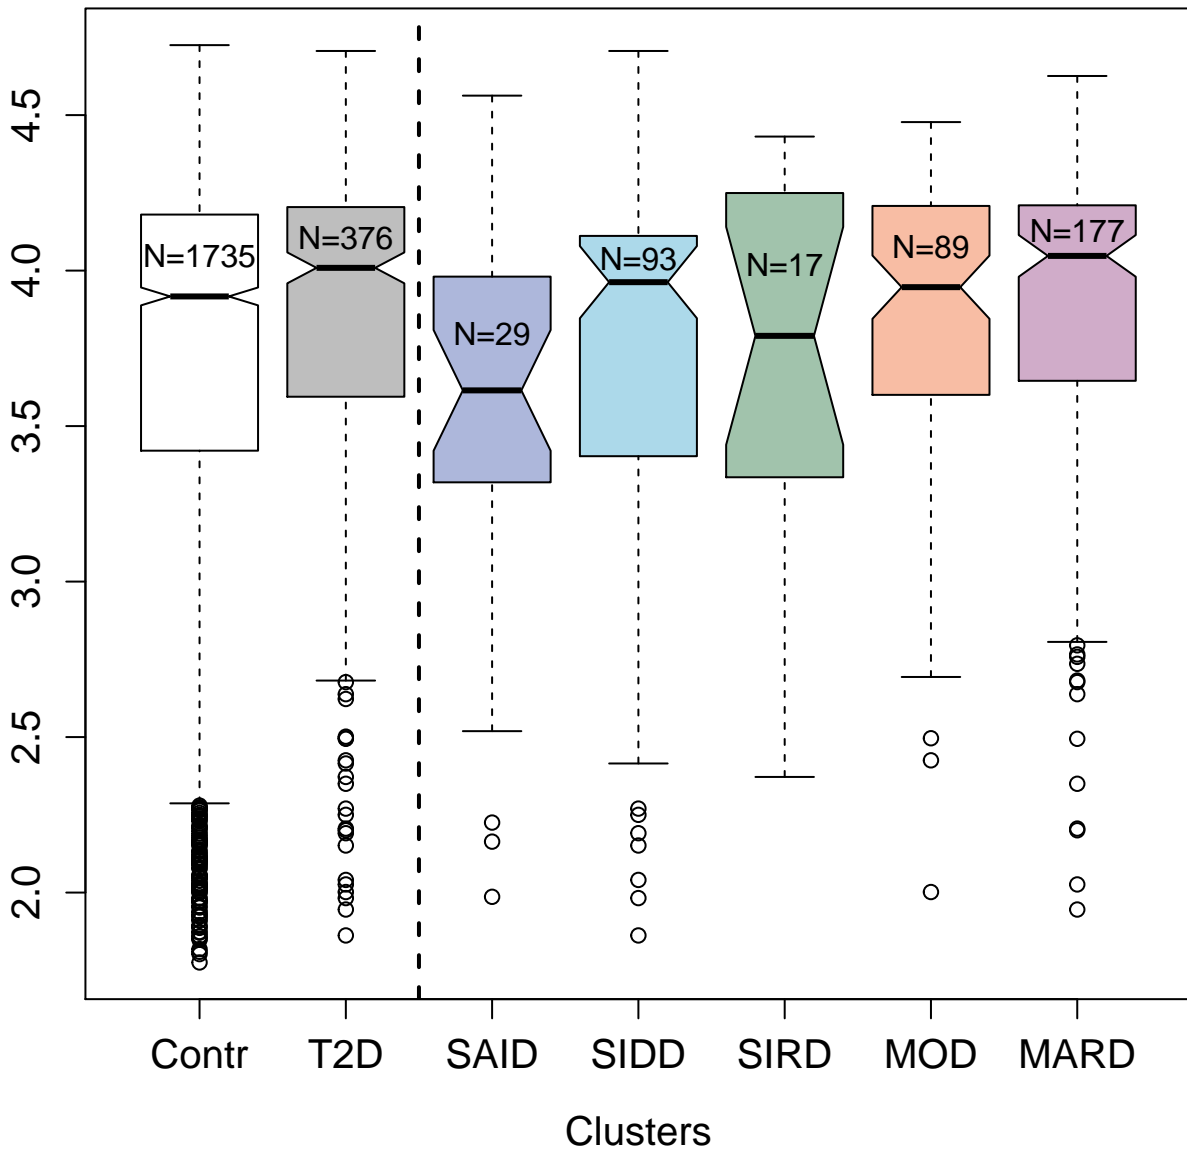

4490-65\_2 : Interleukin-3 receptor subunit alpha

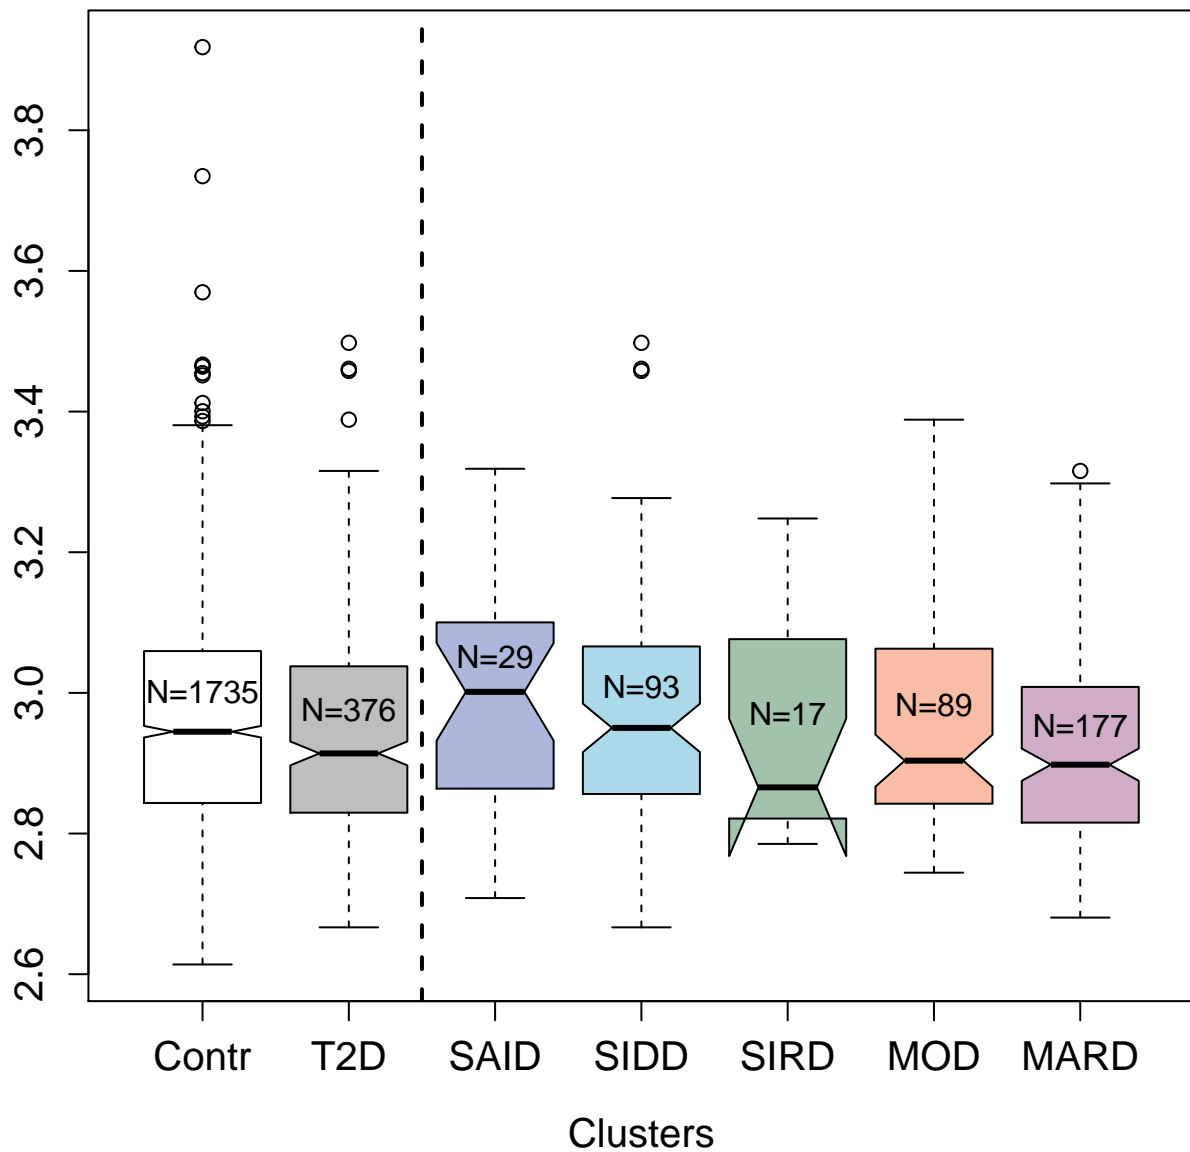

4294-16\_2 : Sphingosine kinase 1

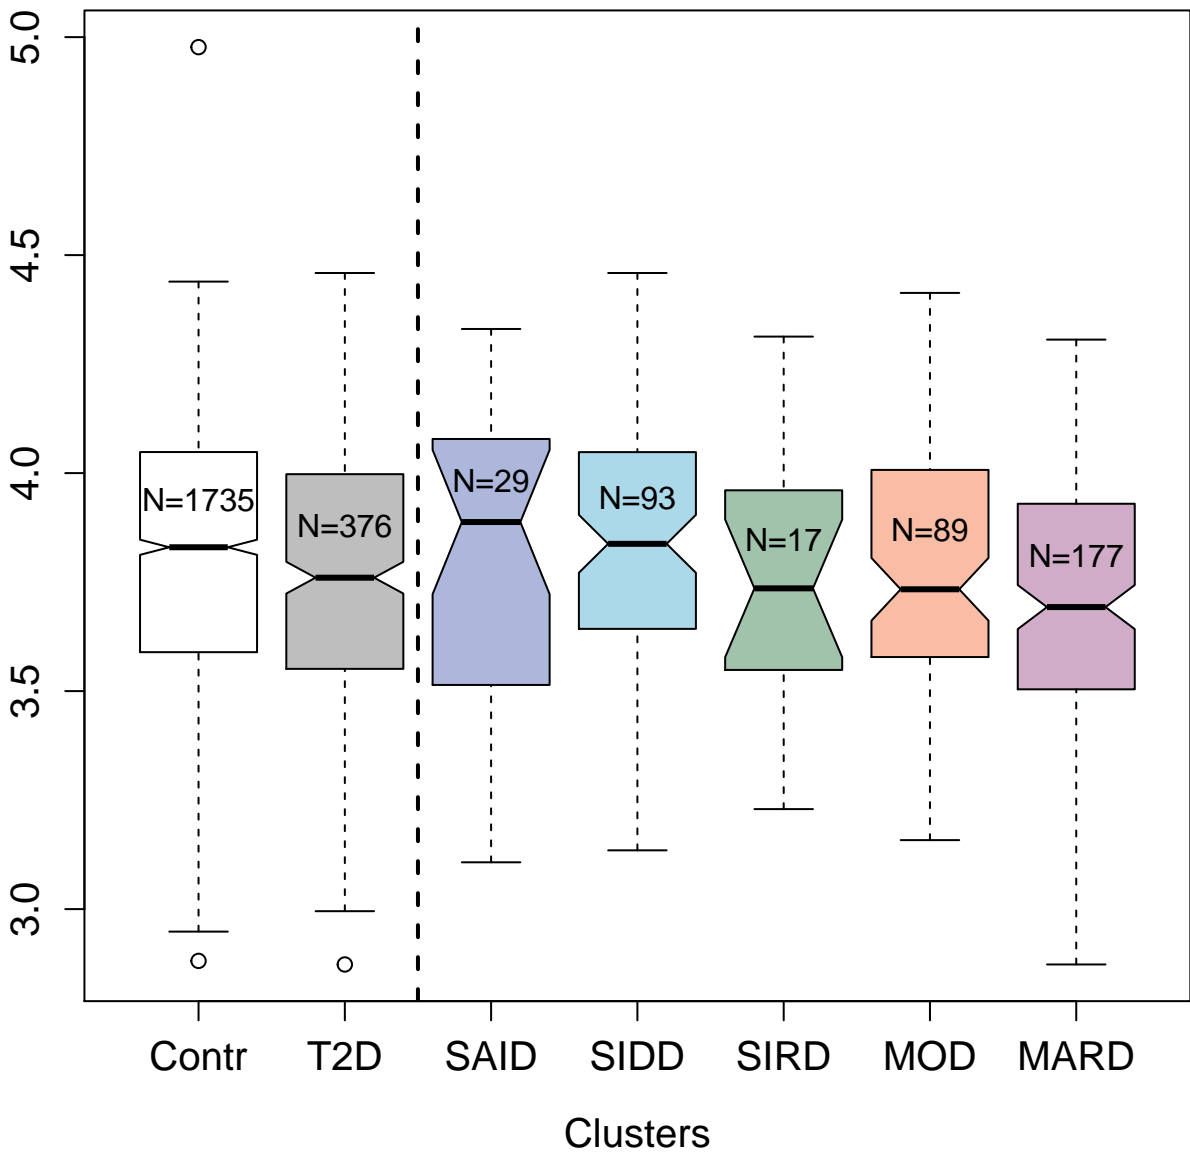

3399-31\_2 : Stabilin-2

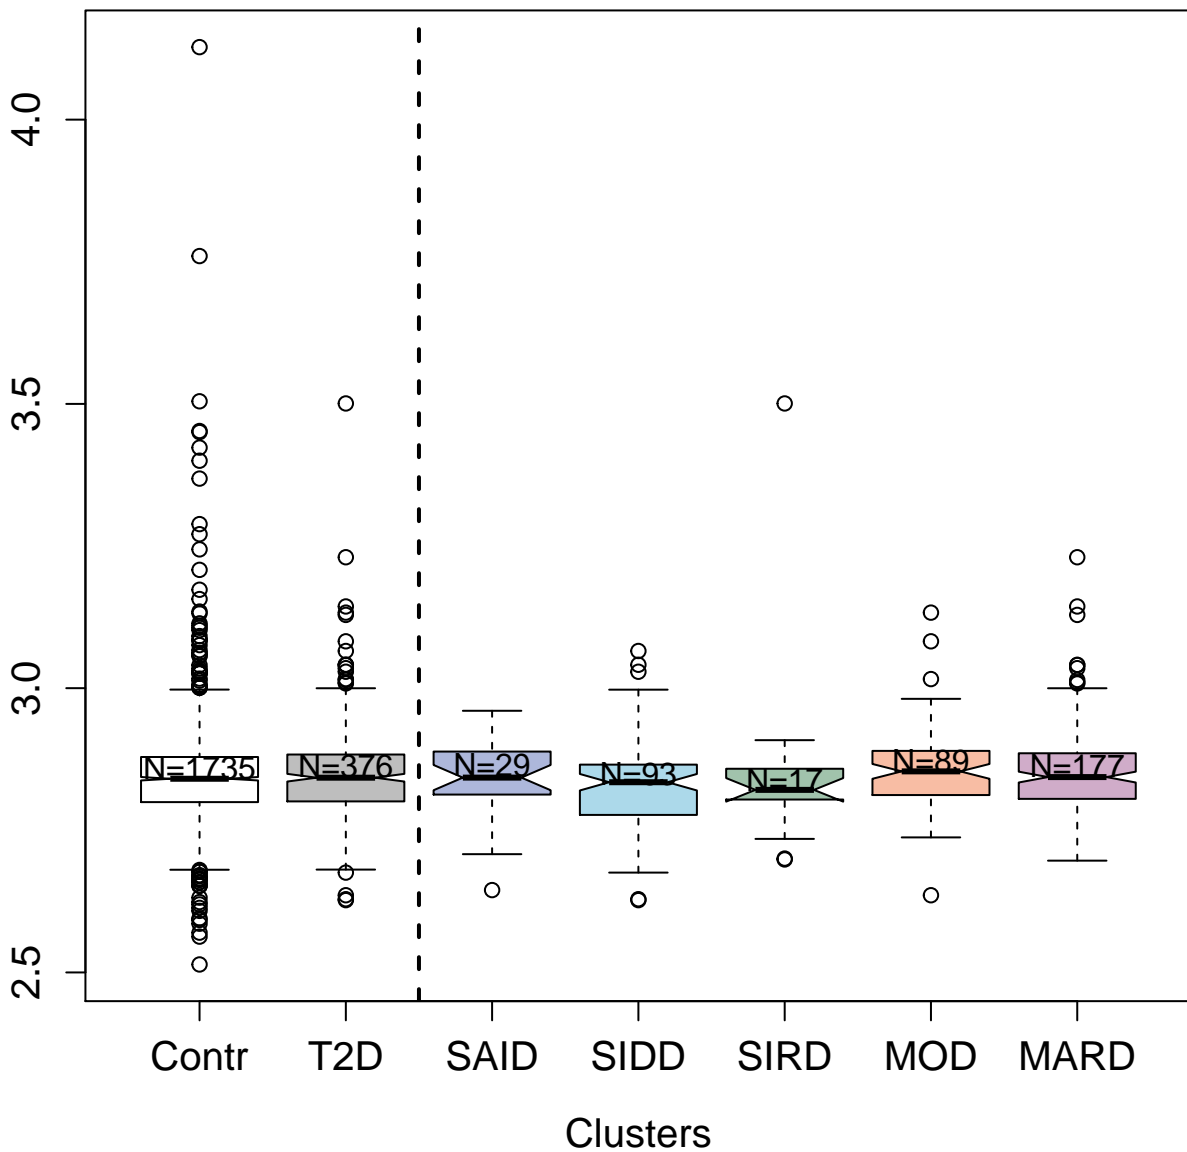

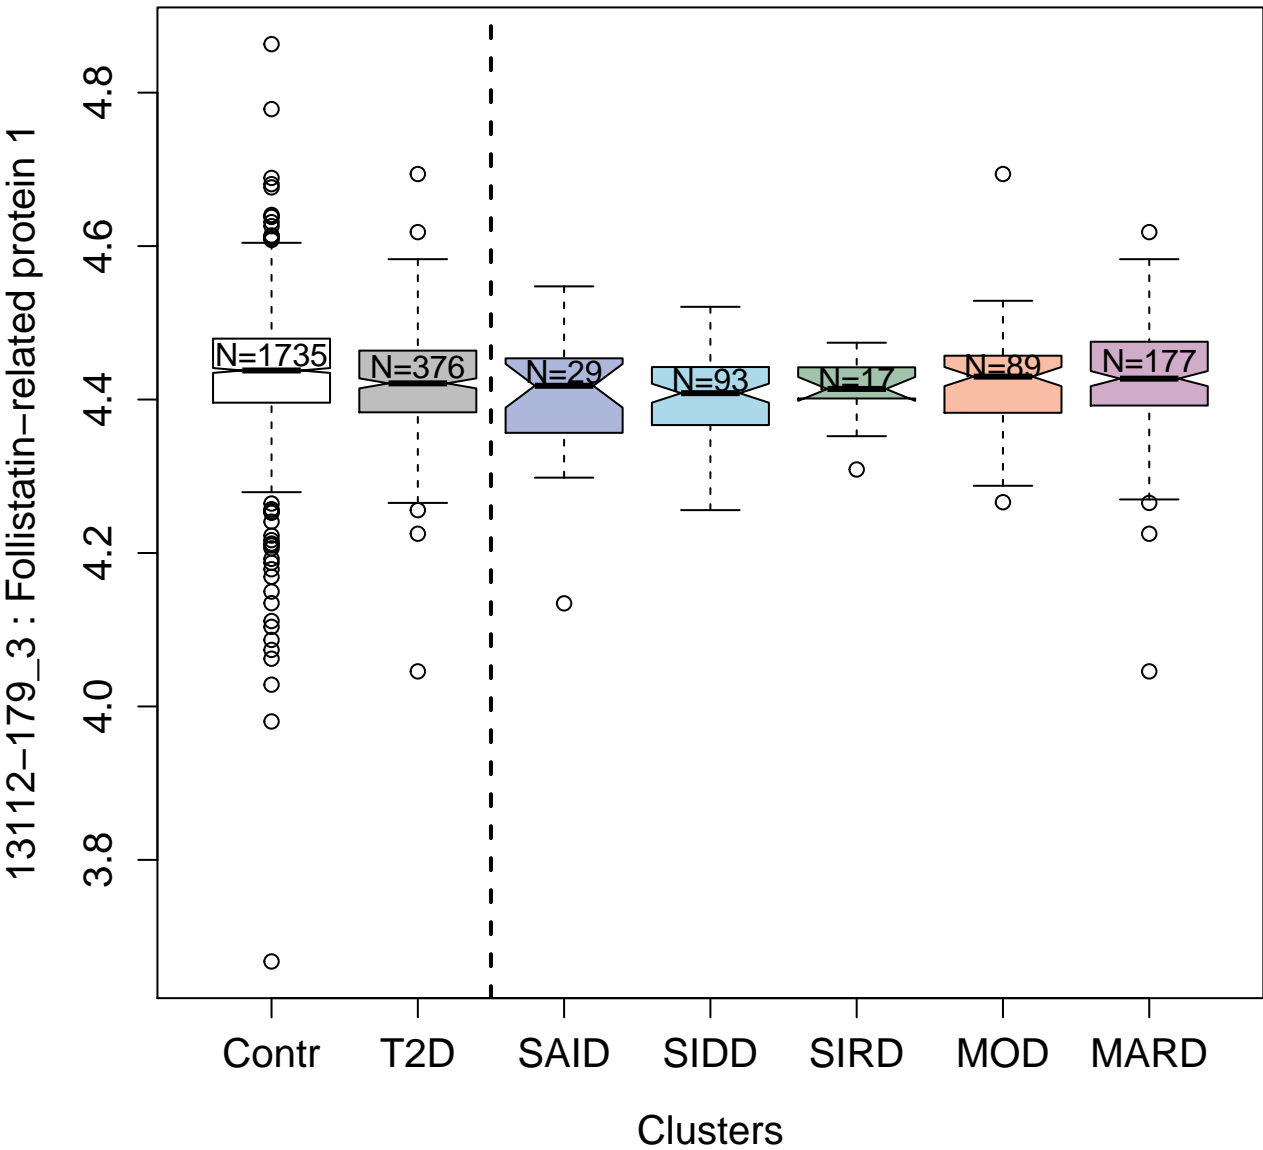

3044-3\_2 : C-C motif chemokine 18

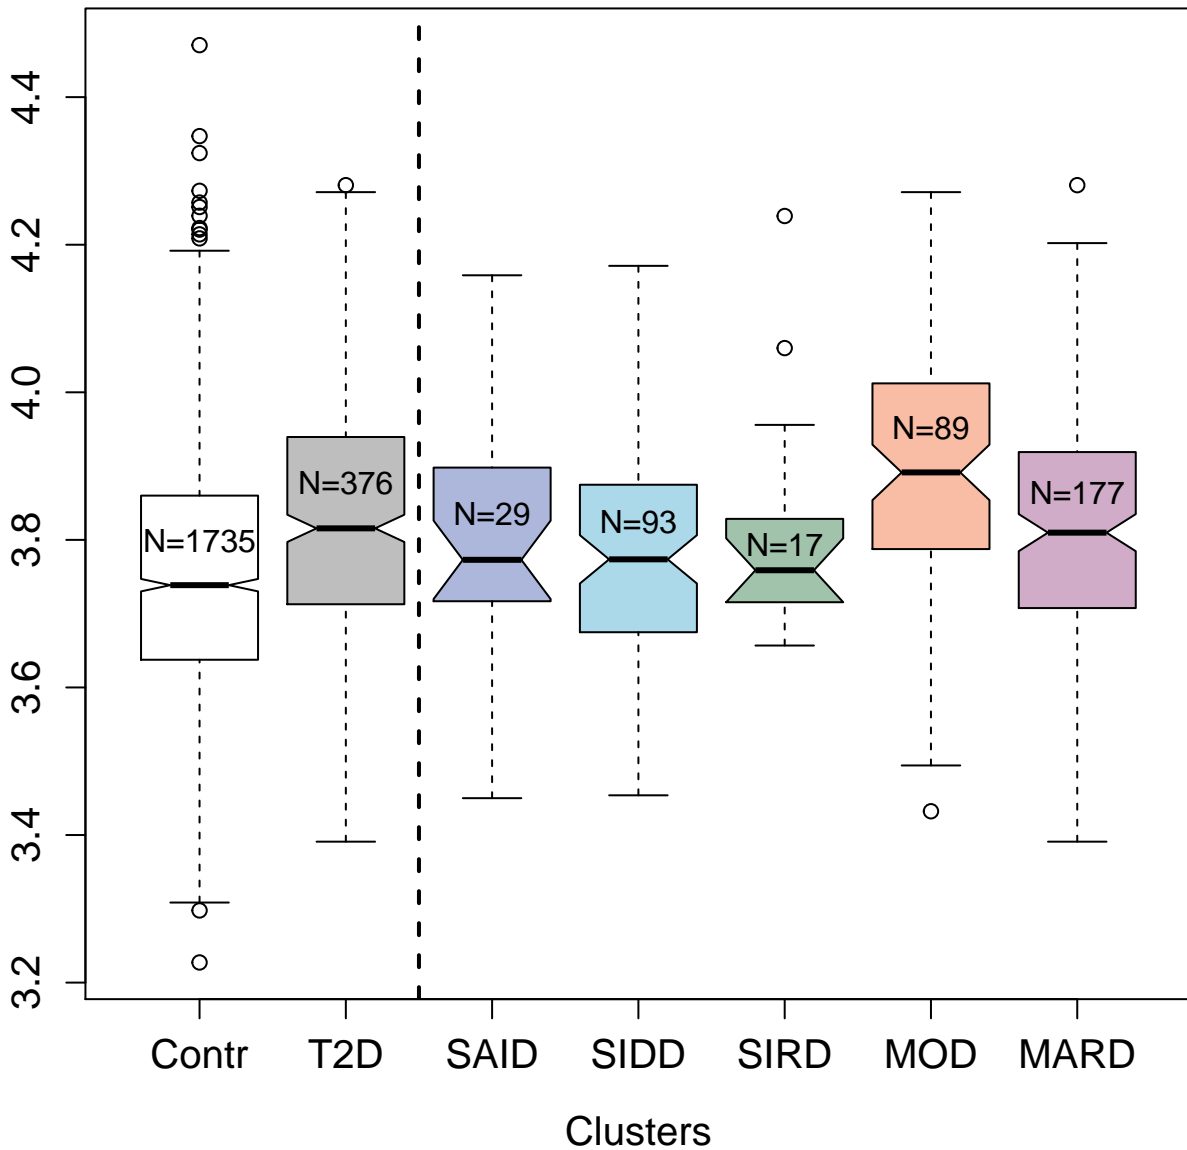



4374-45\_2 : Growth/differentiation factor 15

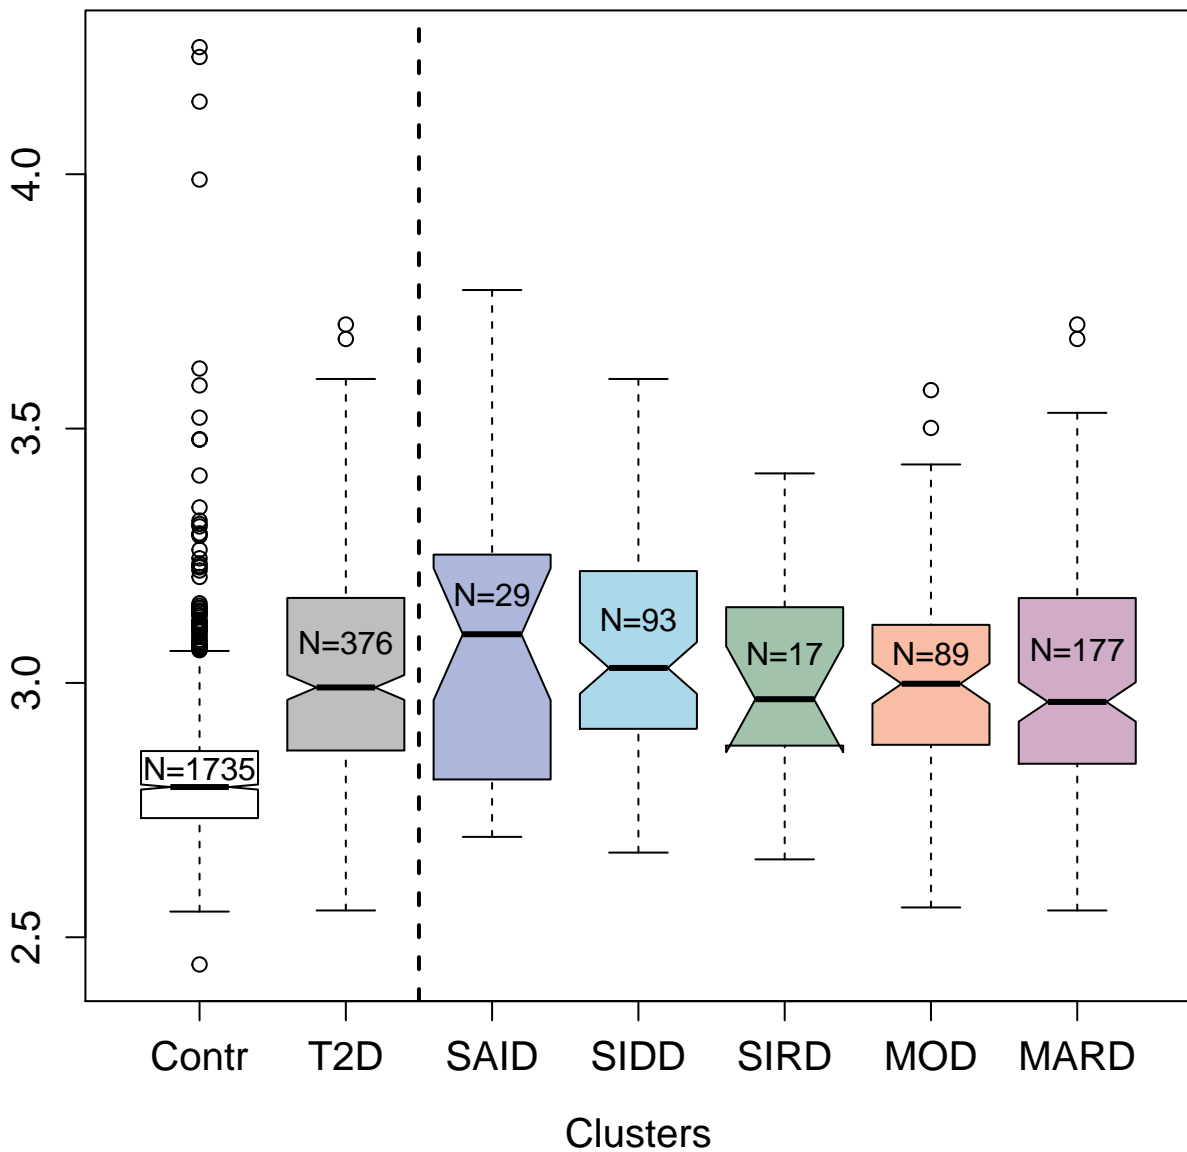

11103-24\_3 : Heat shock protein beta-1

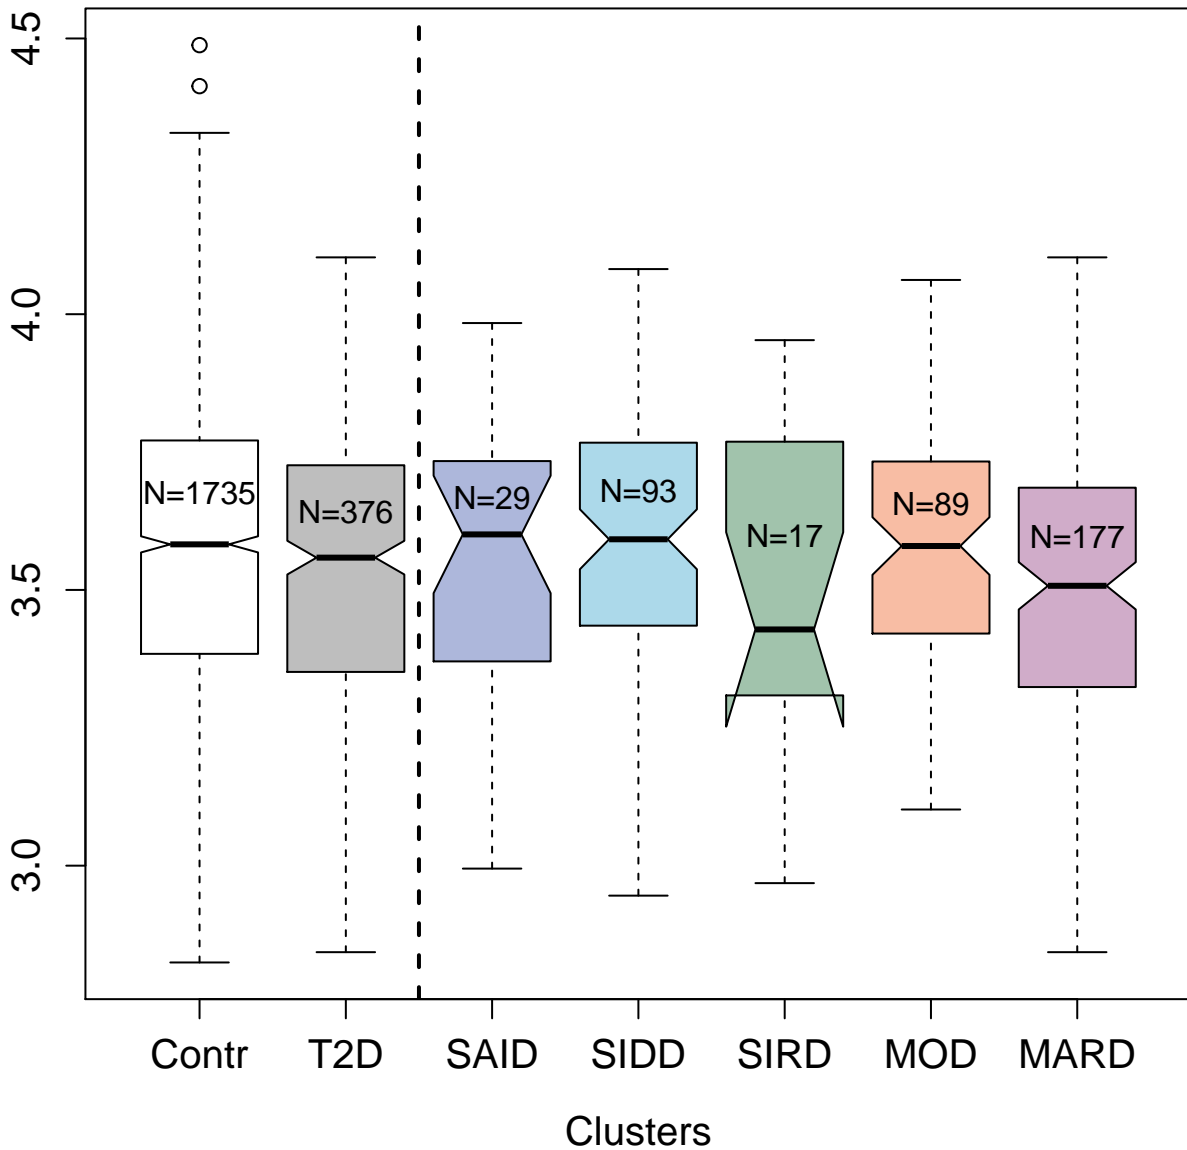

5259-2\_3 : Mitogen-activated protein kinase  
kinase kinase 7: TGF-beta-activated kinase 1 and  
3.0 MAP3K7-binding protein 4.0 fusion 4.5

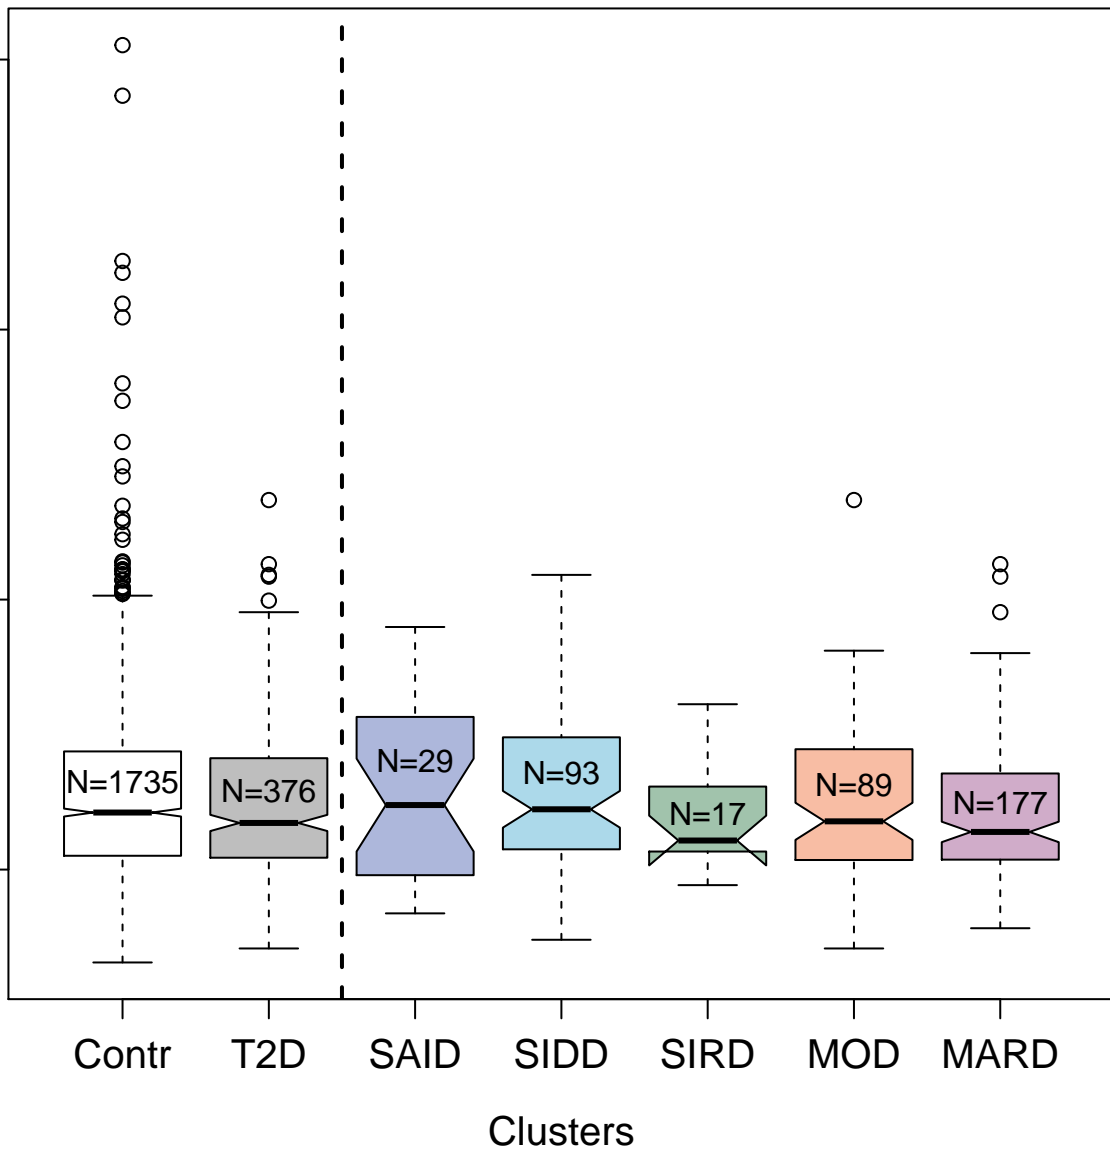

5007-1\_1 : Mitogen-activated protein kinase 14

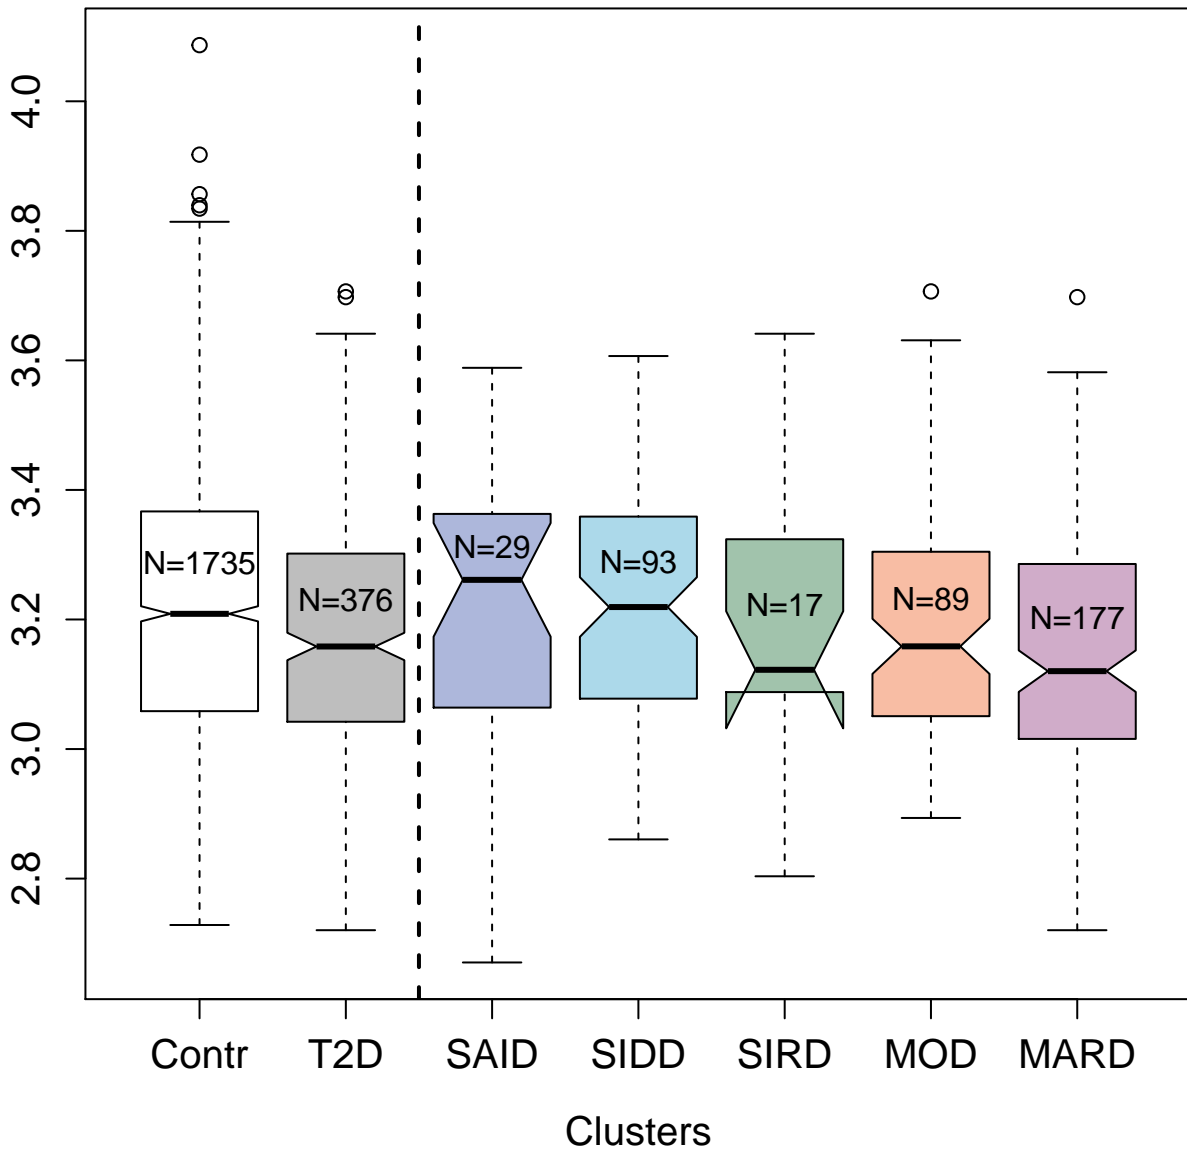

5035-7\_1 : Thymidylate synthase

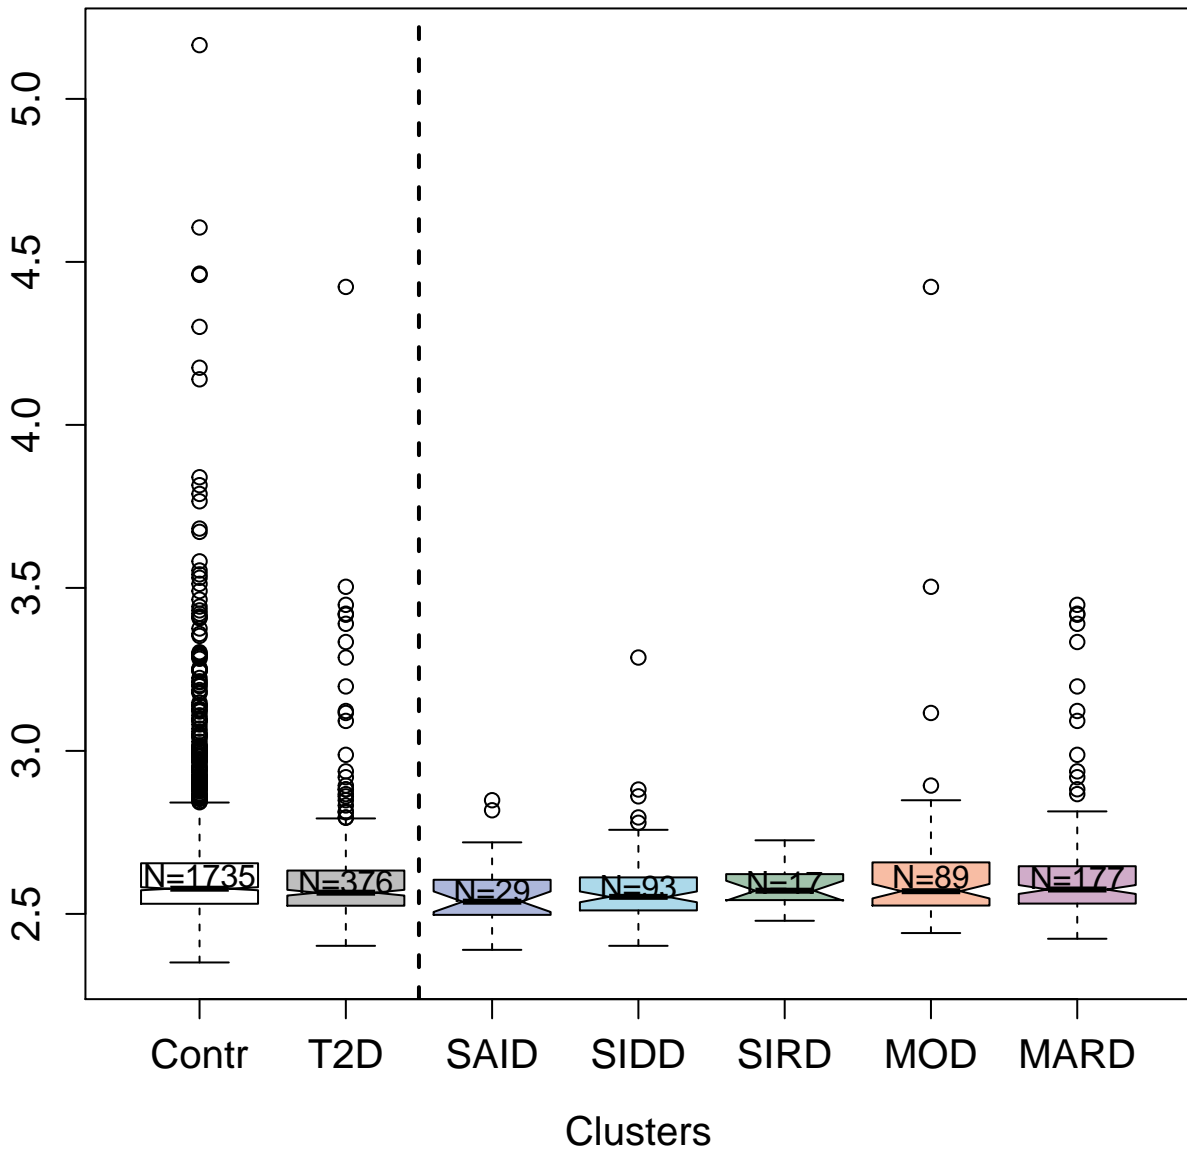

14147-50\_3 : Interferon gamma

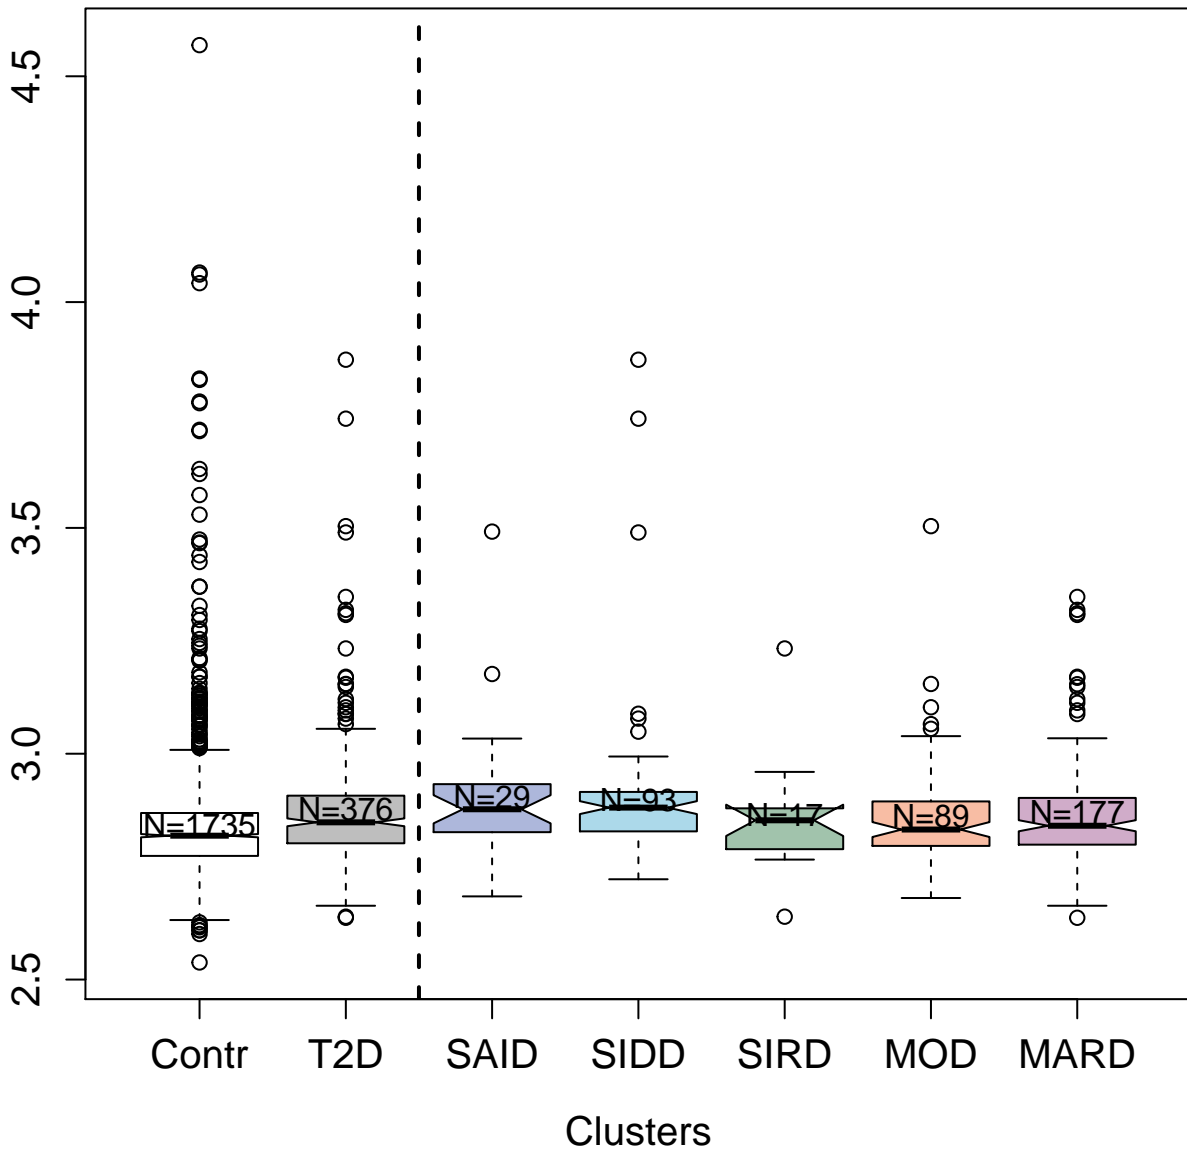

4355-13\_1 : Death-associated protein kinase 2

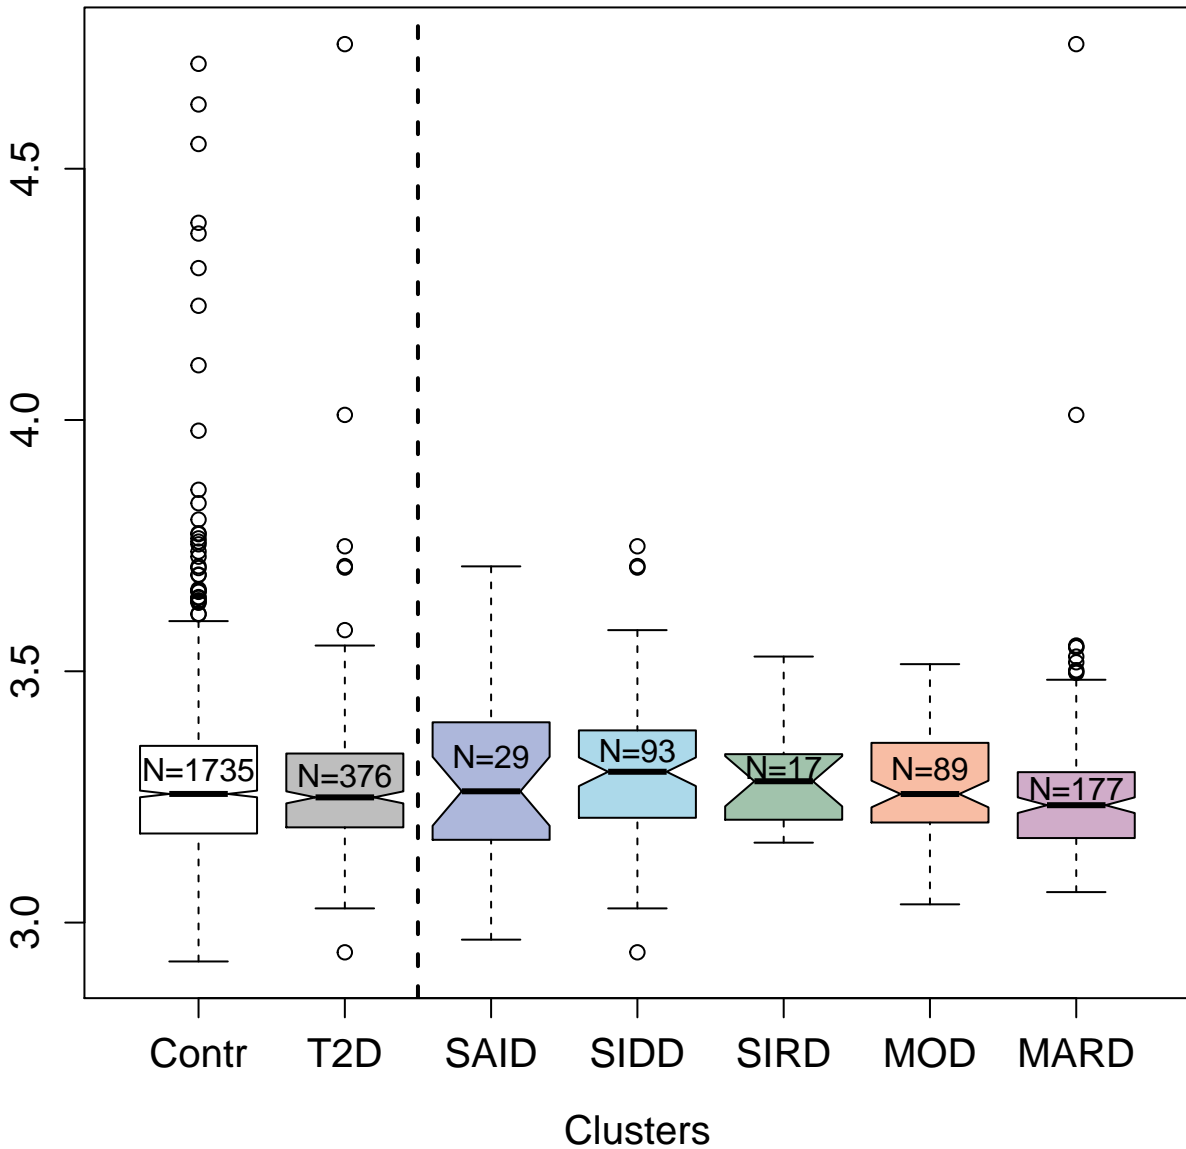

2998-53\_2 : Junctional adhesion molecule C

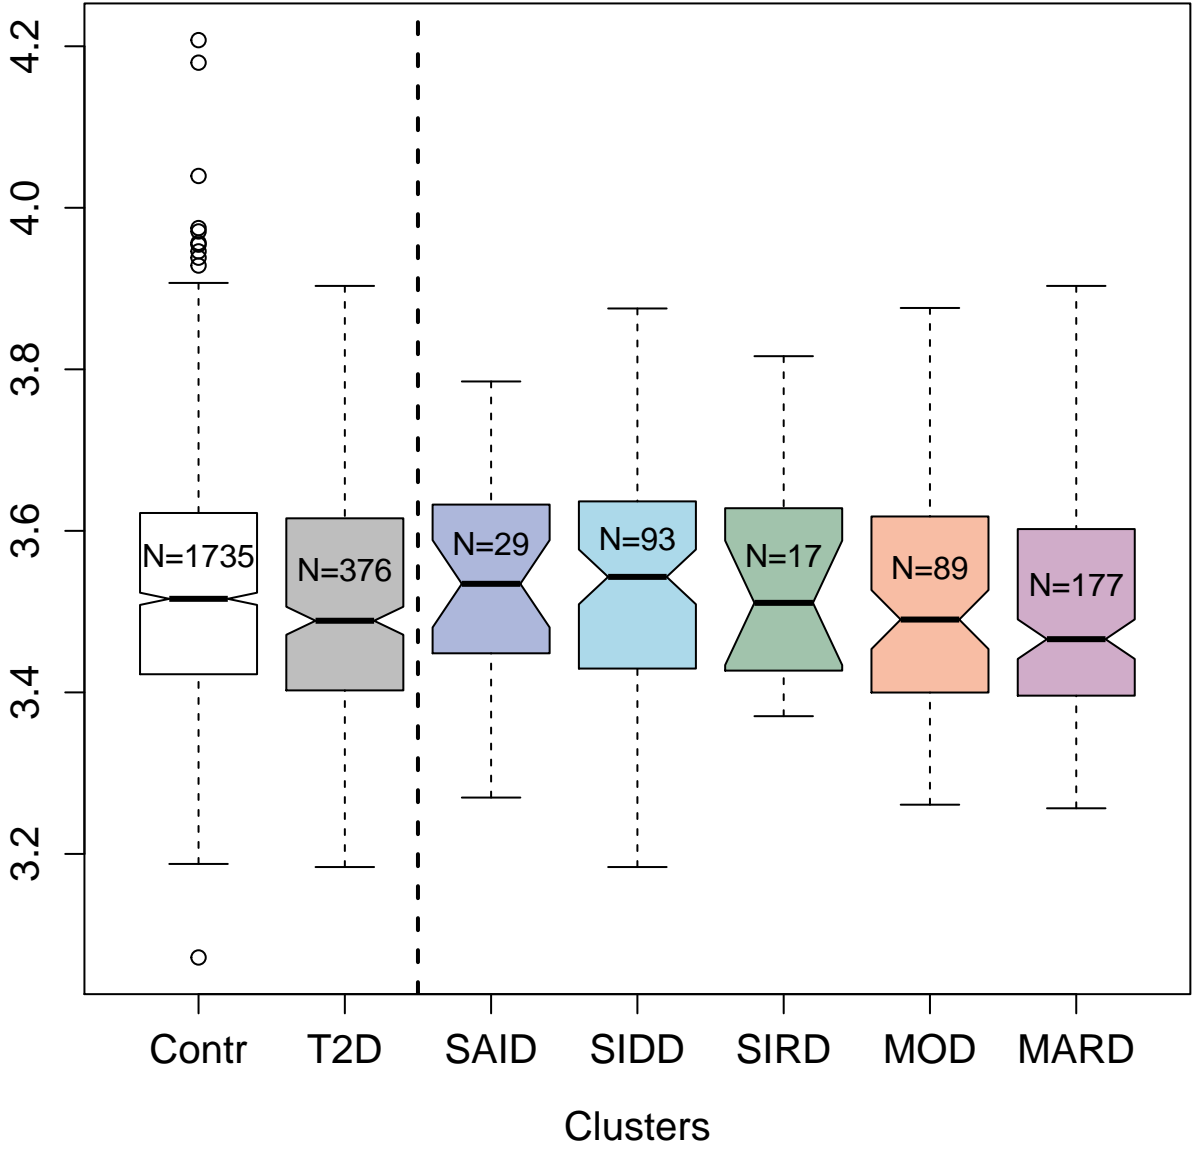



2974-61\_2 : Contactin-1

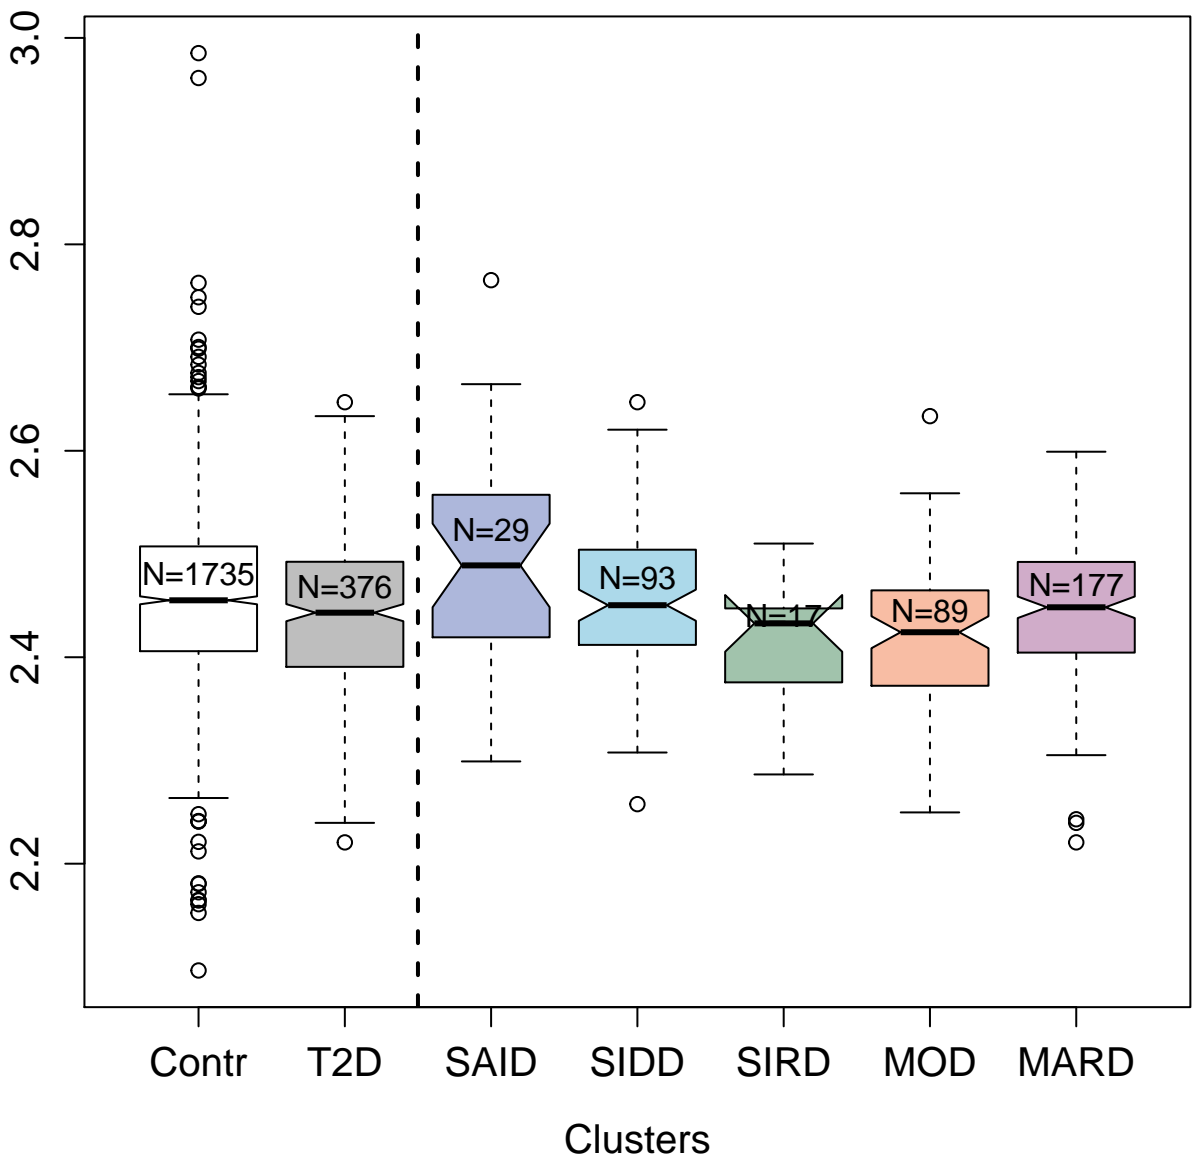

3474-19\_2 : Thrombospondin-1

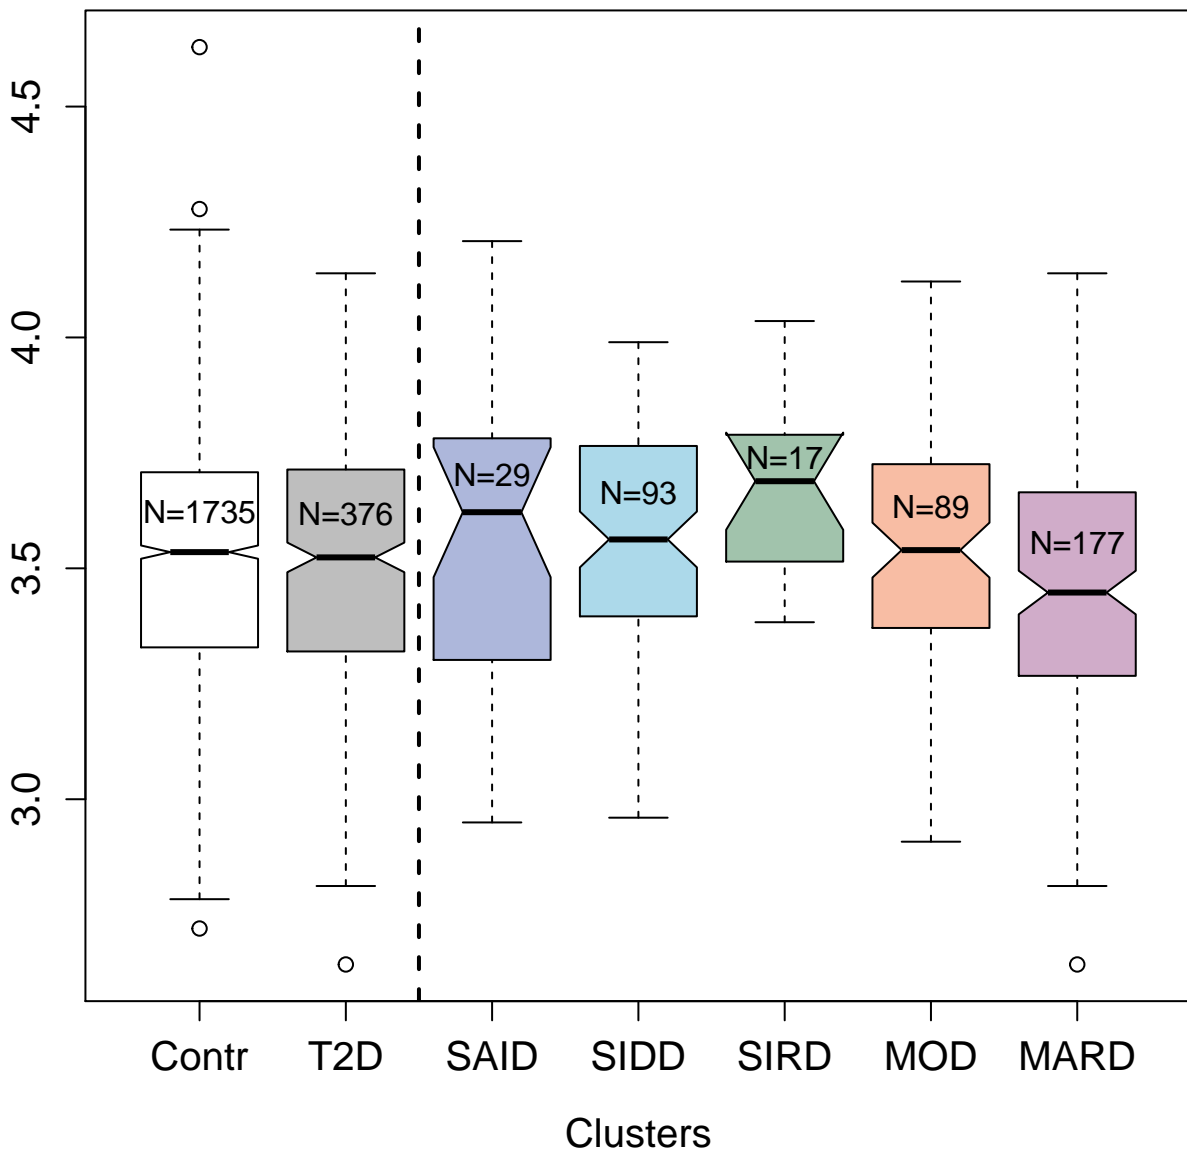

4393-3\_1 : Fibroblast growth factor 16

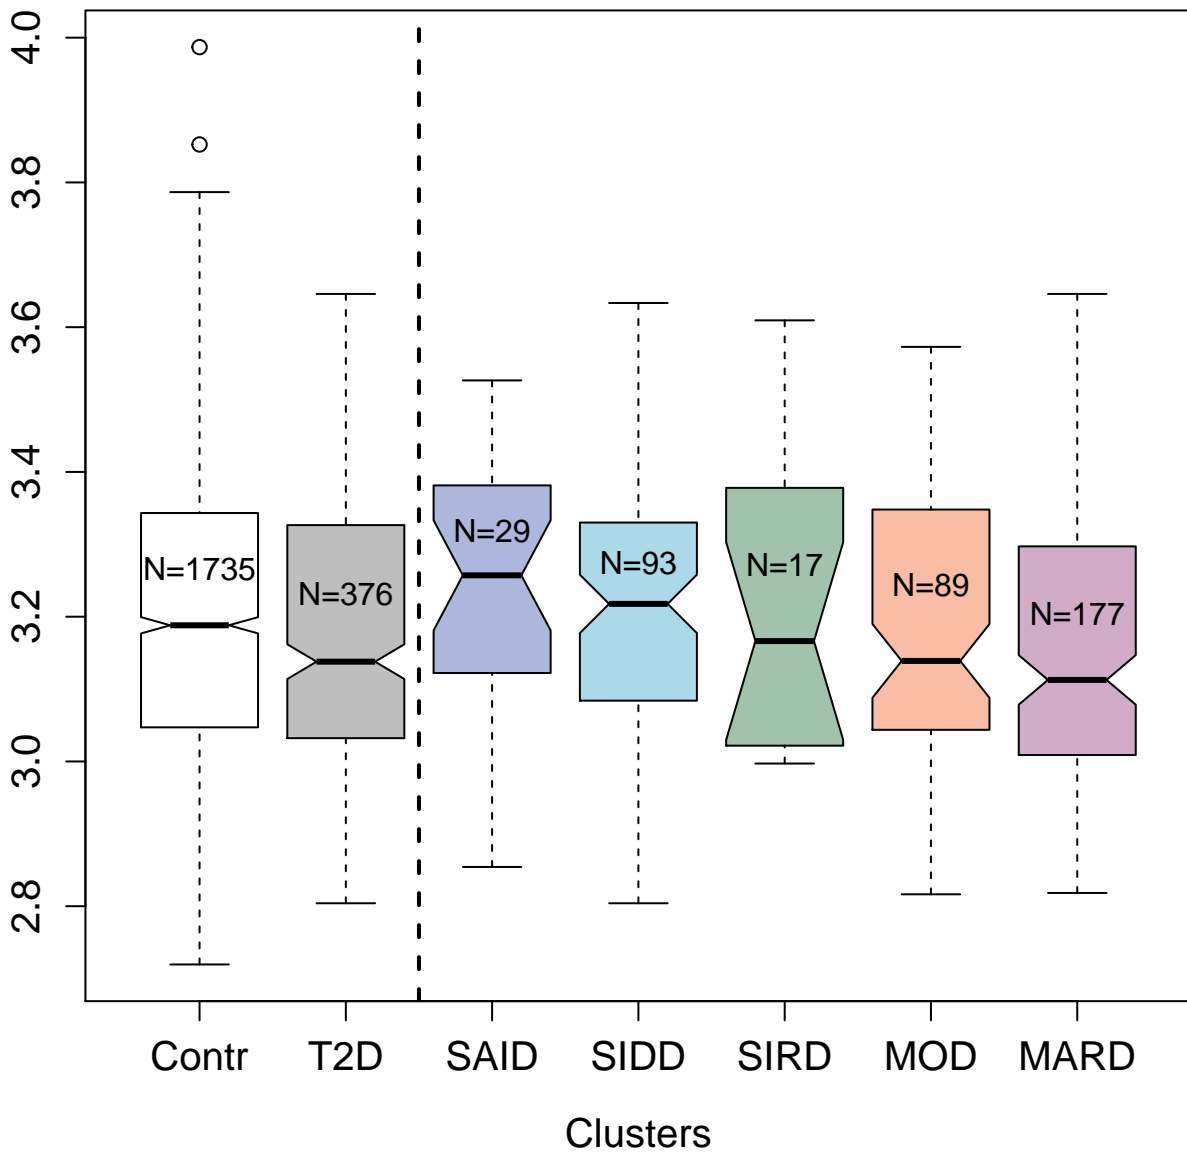

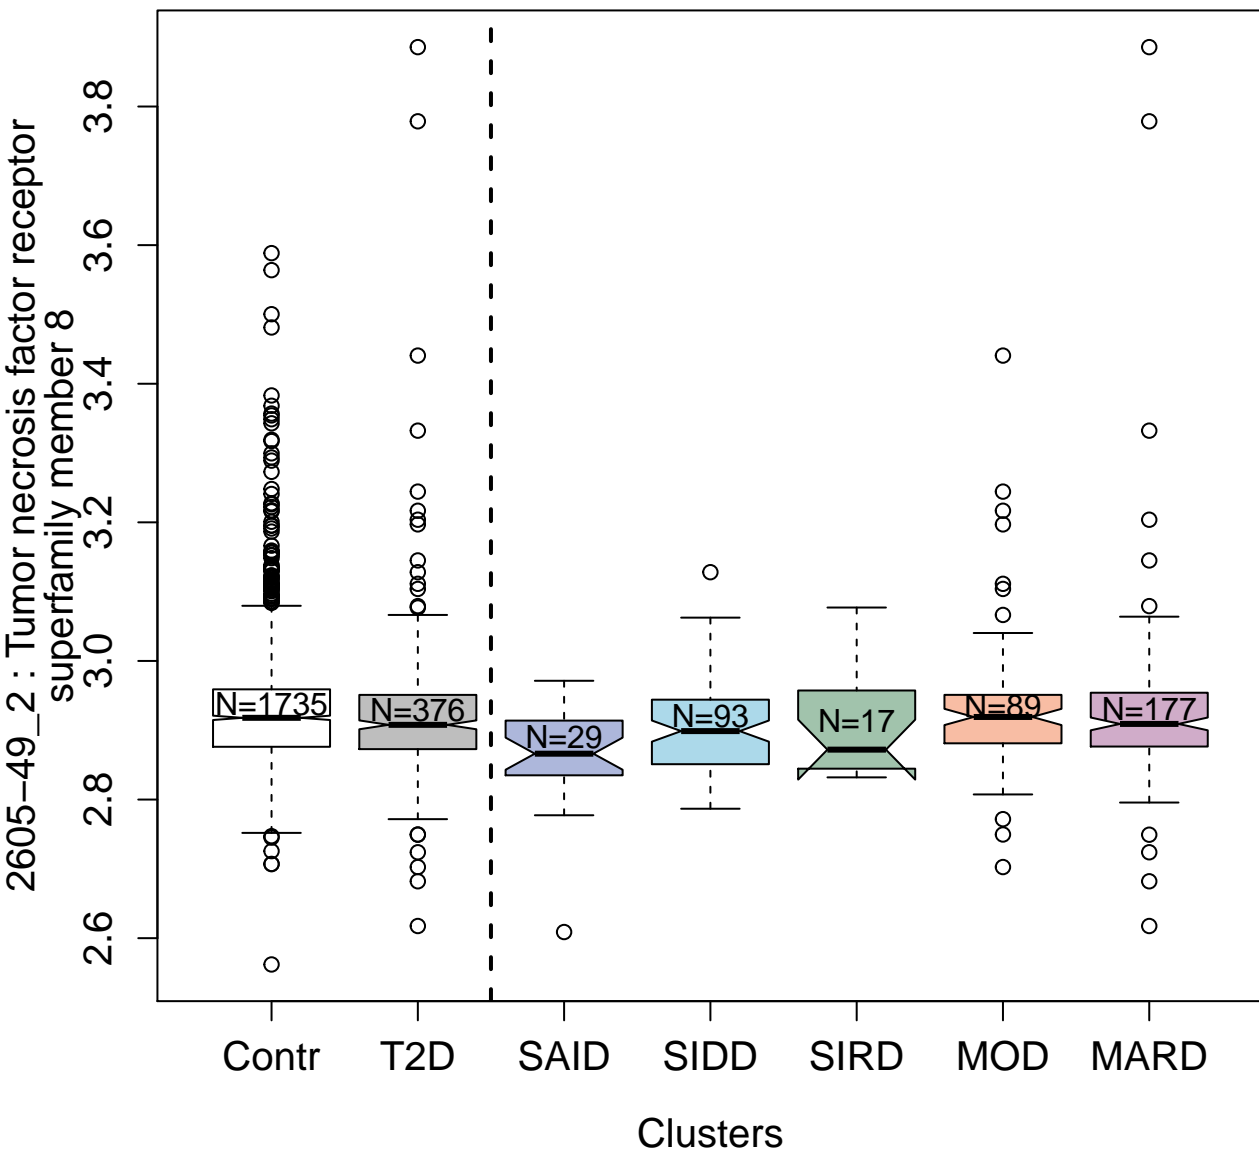

5011-11\_1 : Nicotinamide  
phosphoribosyltransferase

2.5

3.0

3.5

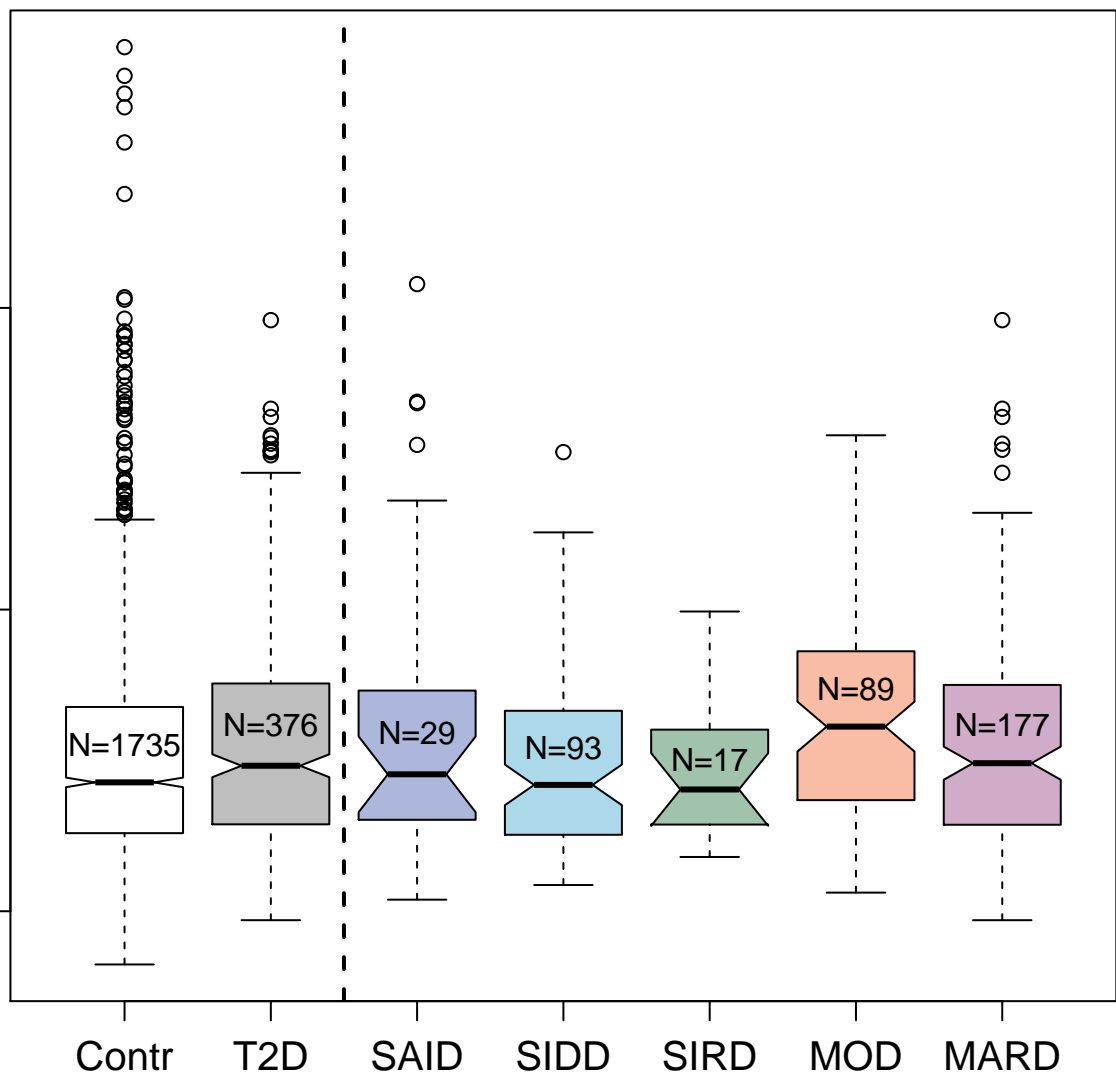

Clusters

4989-7\_1 : Fibrinogen gamma chain

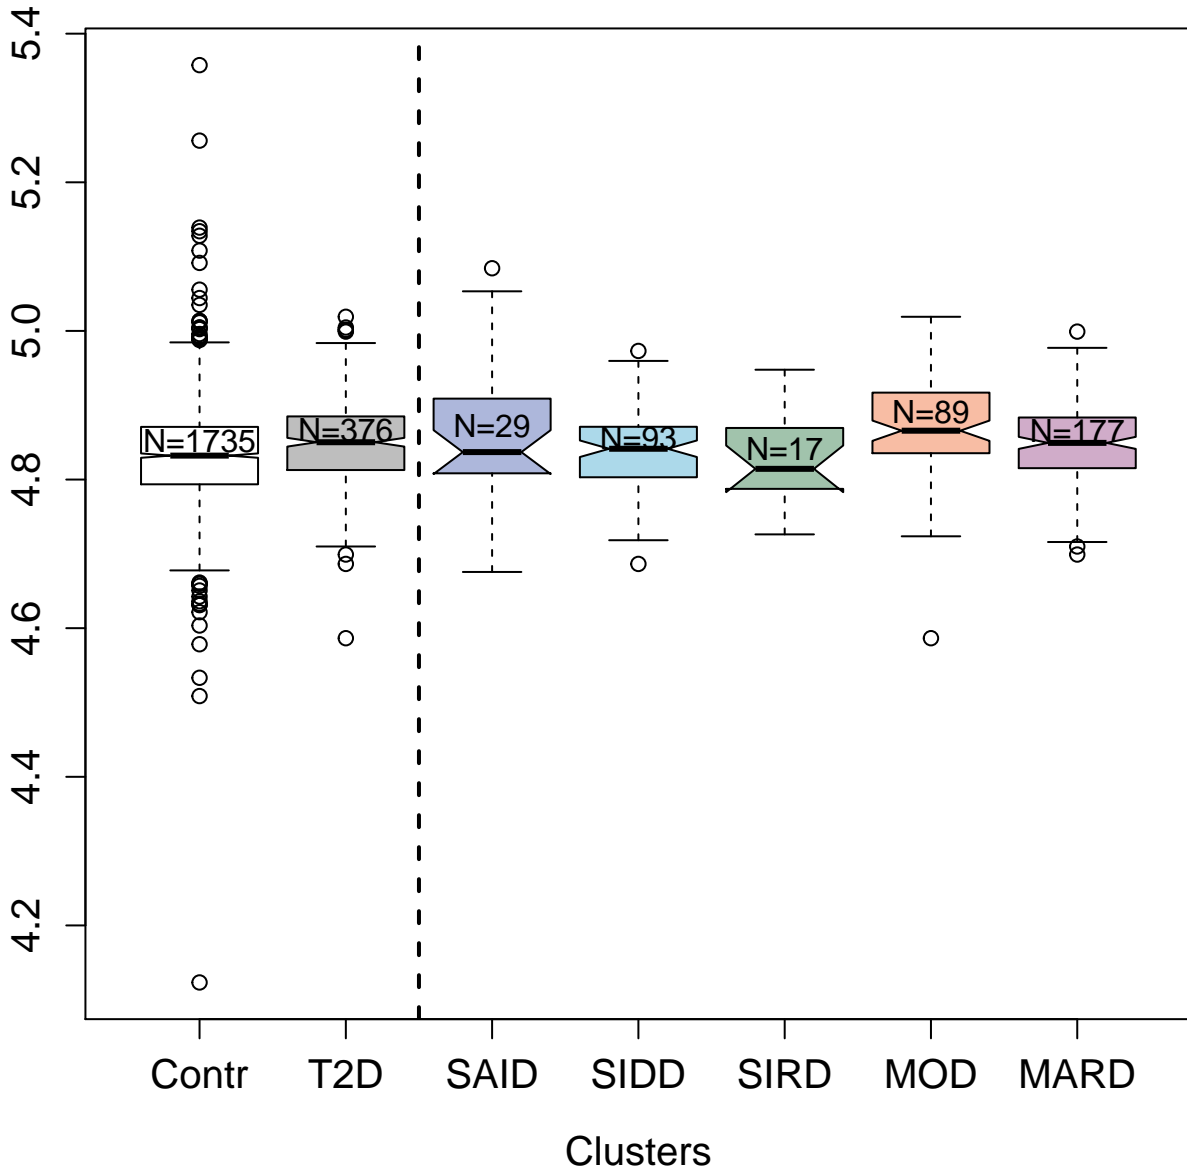

3197-70\_2 : Insulin-degrading enzyme

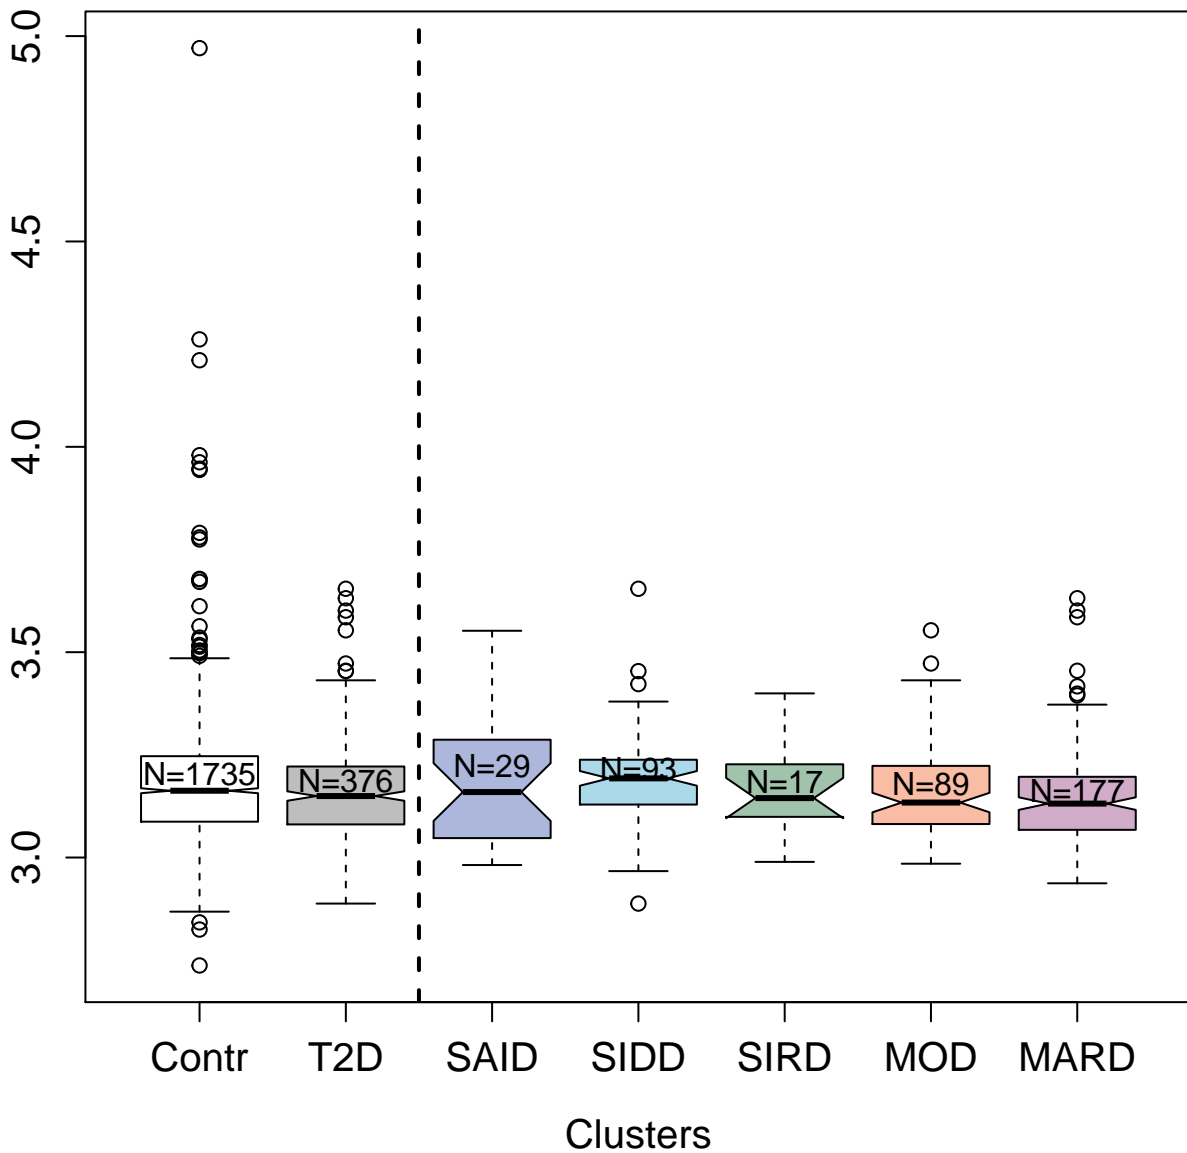

3083-71\_1 : Tumor necrosis factor receptor  
superfamily member 27

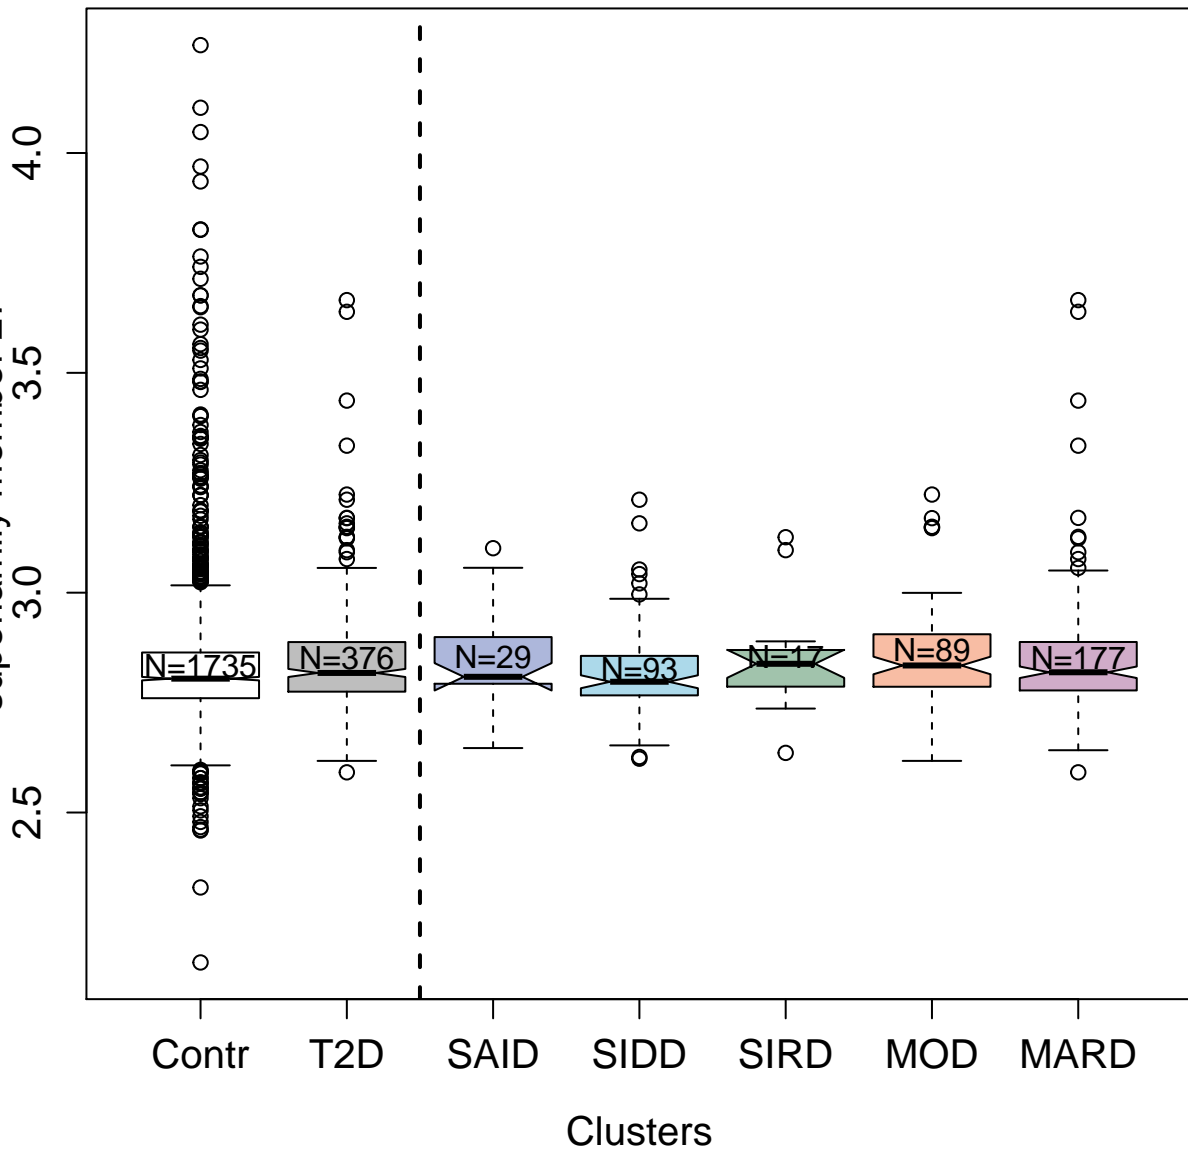



2790-54\_2 : Neutrophil-activating peptide 2

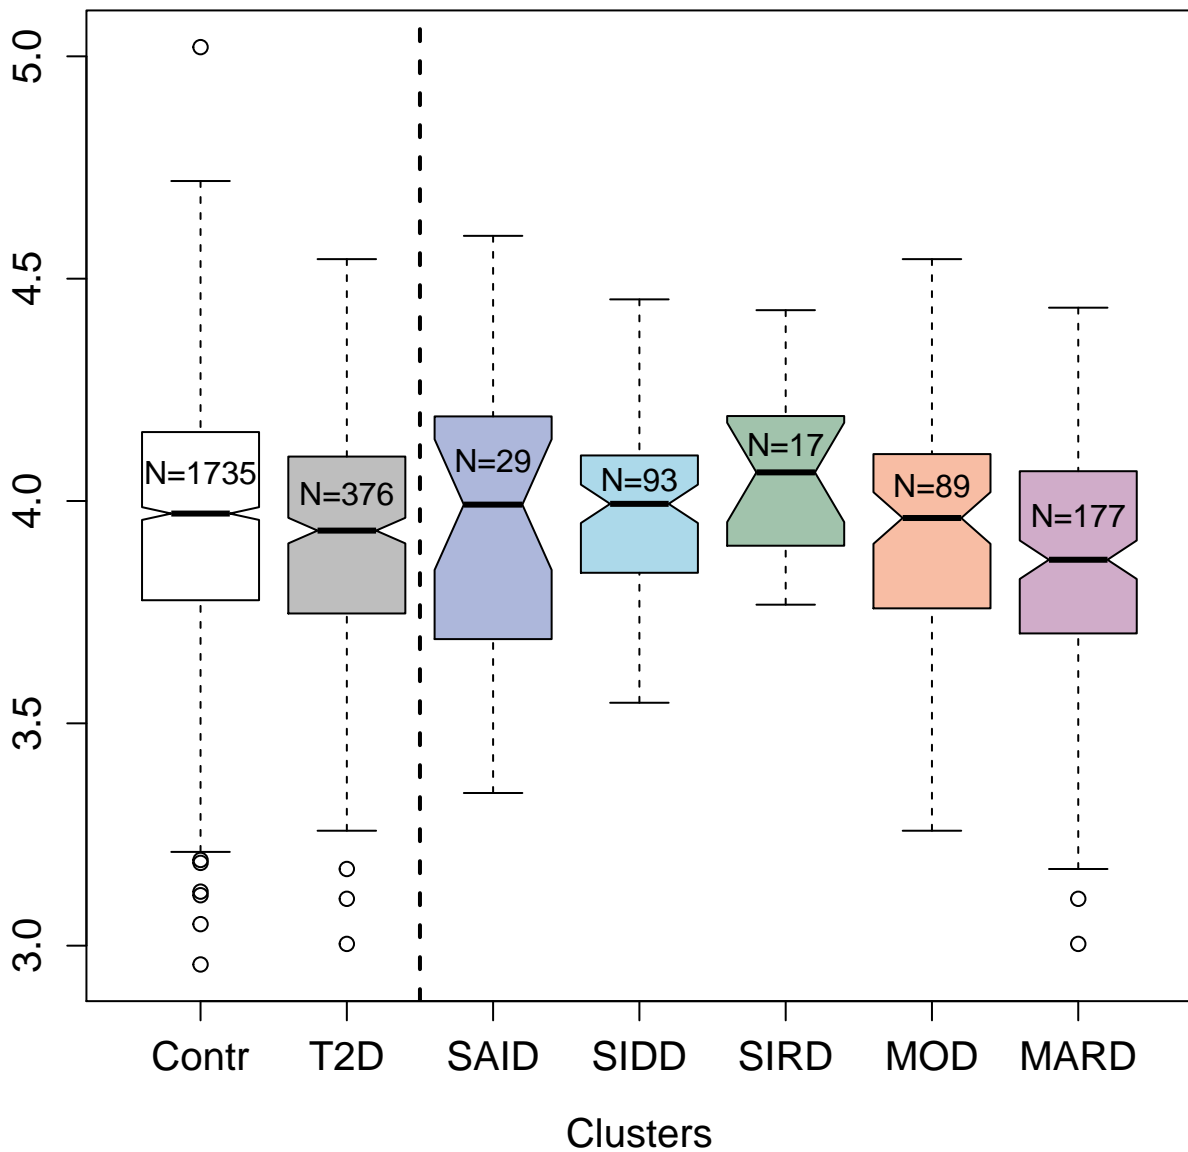

2634-2\_2 : Cytokine receptor common subunit gamma

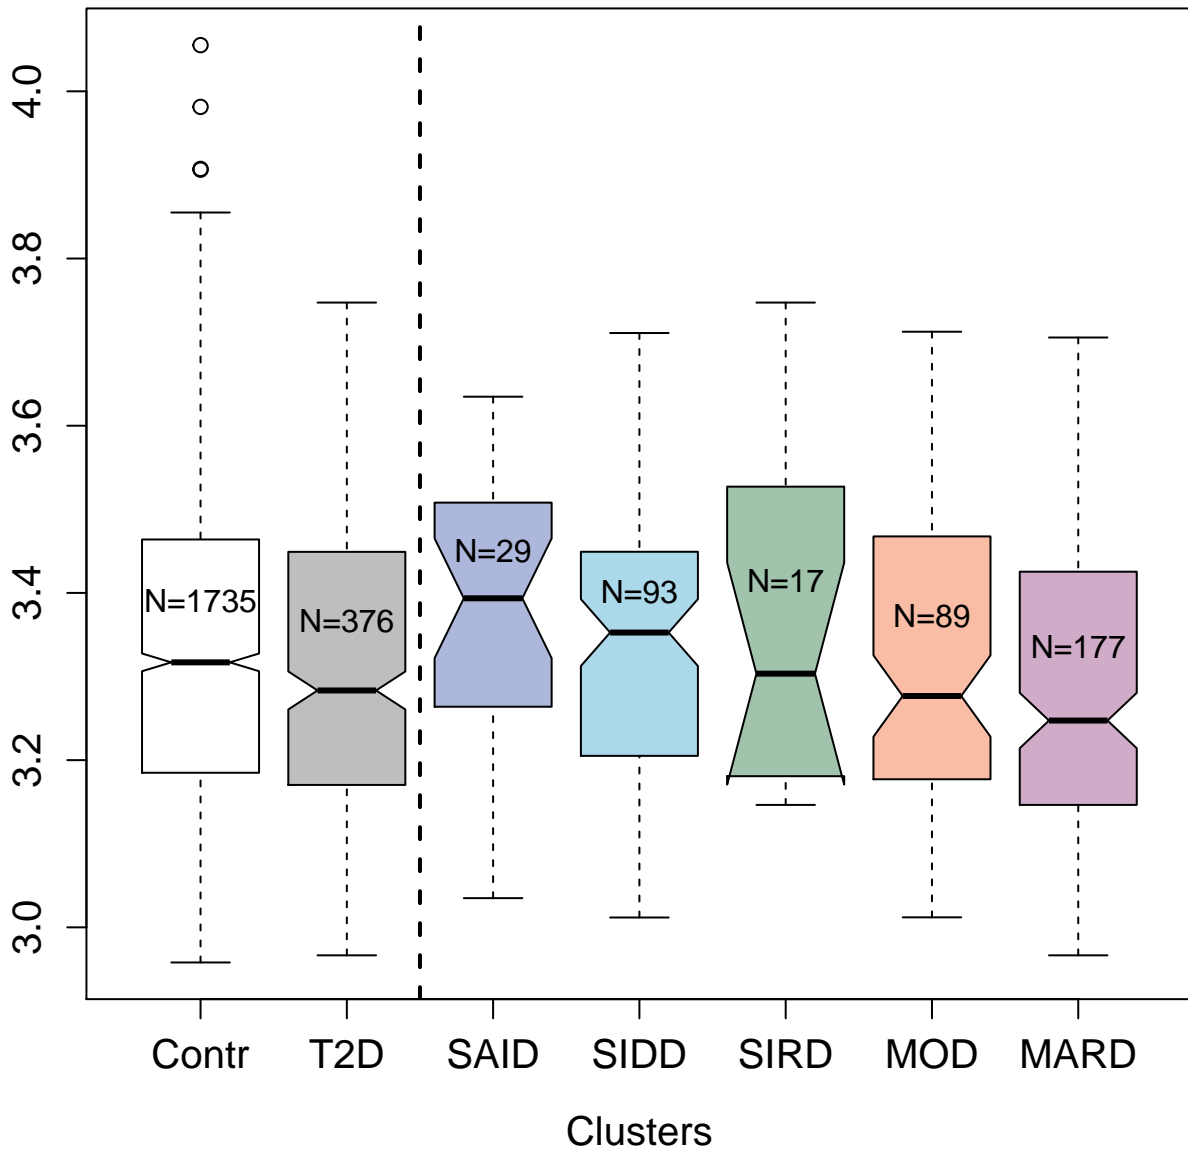

2192-63\_10 : C-C motif chemokine 27

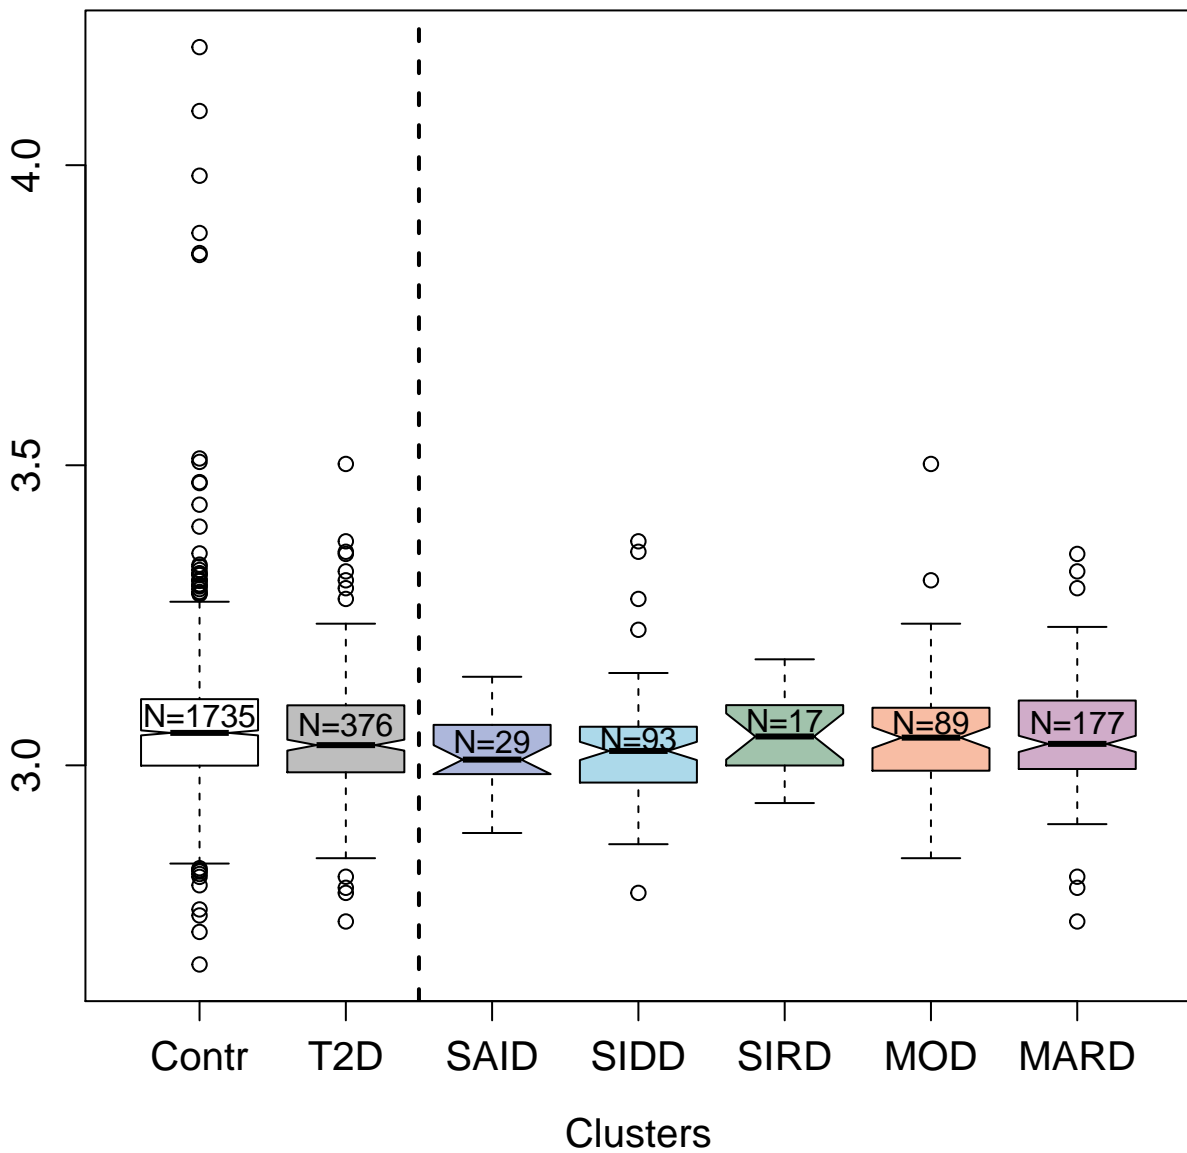

3040-59\_1 : C-C motif chemokine 3

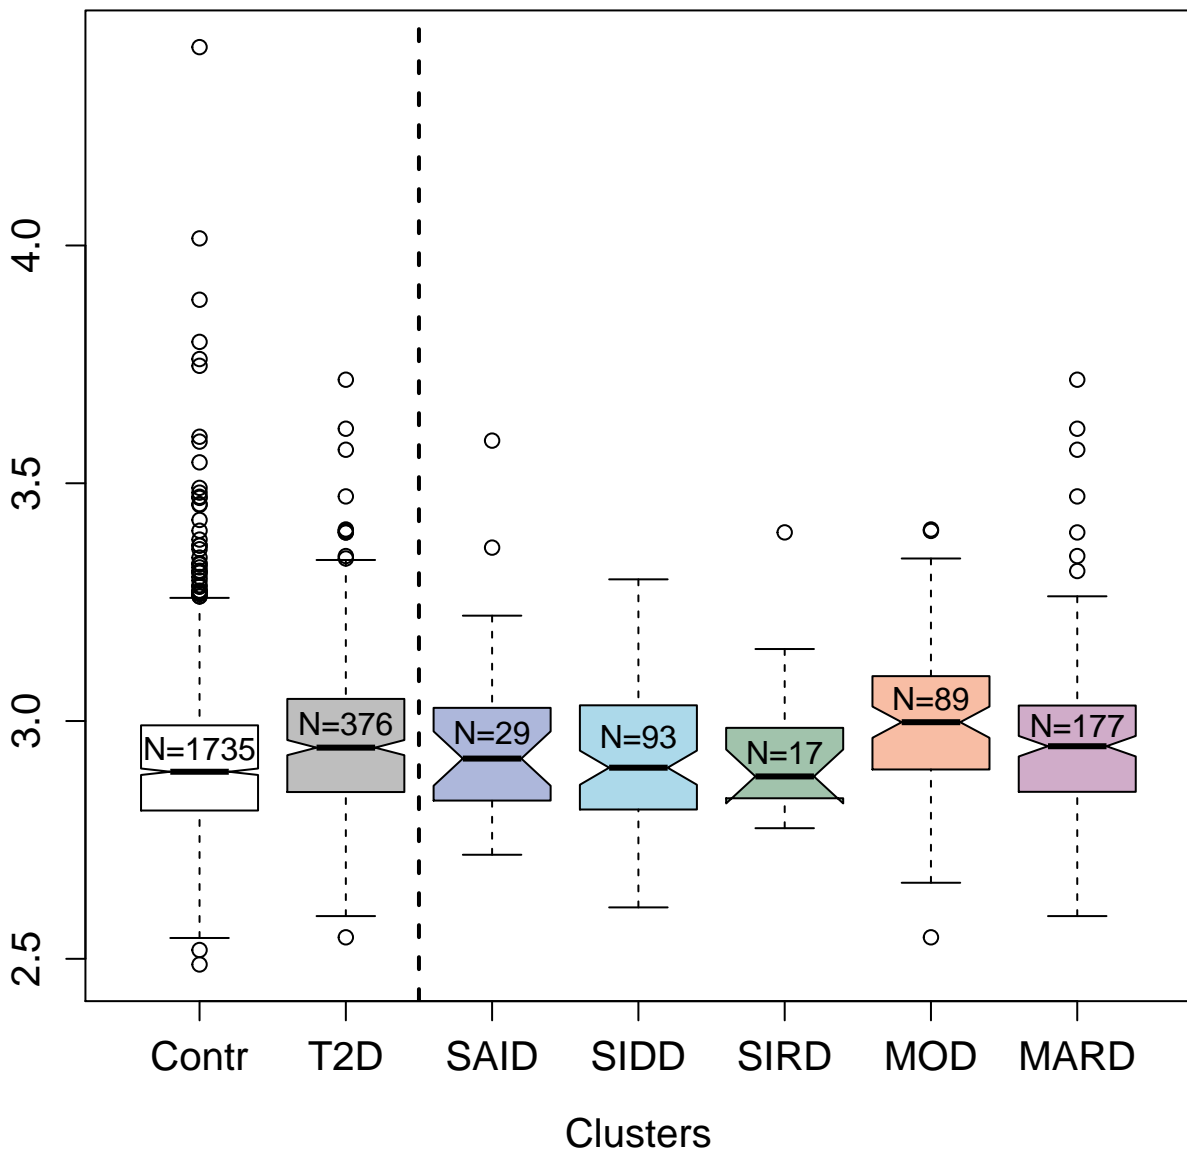

2526-53\_3 : Tumor necrosis factor receptor  
superfamily member 11B

3.5 4.0 4.5

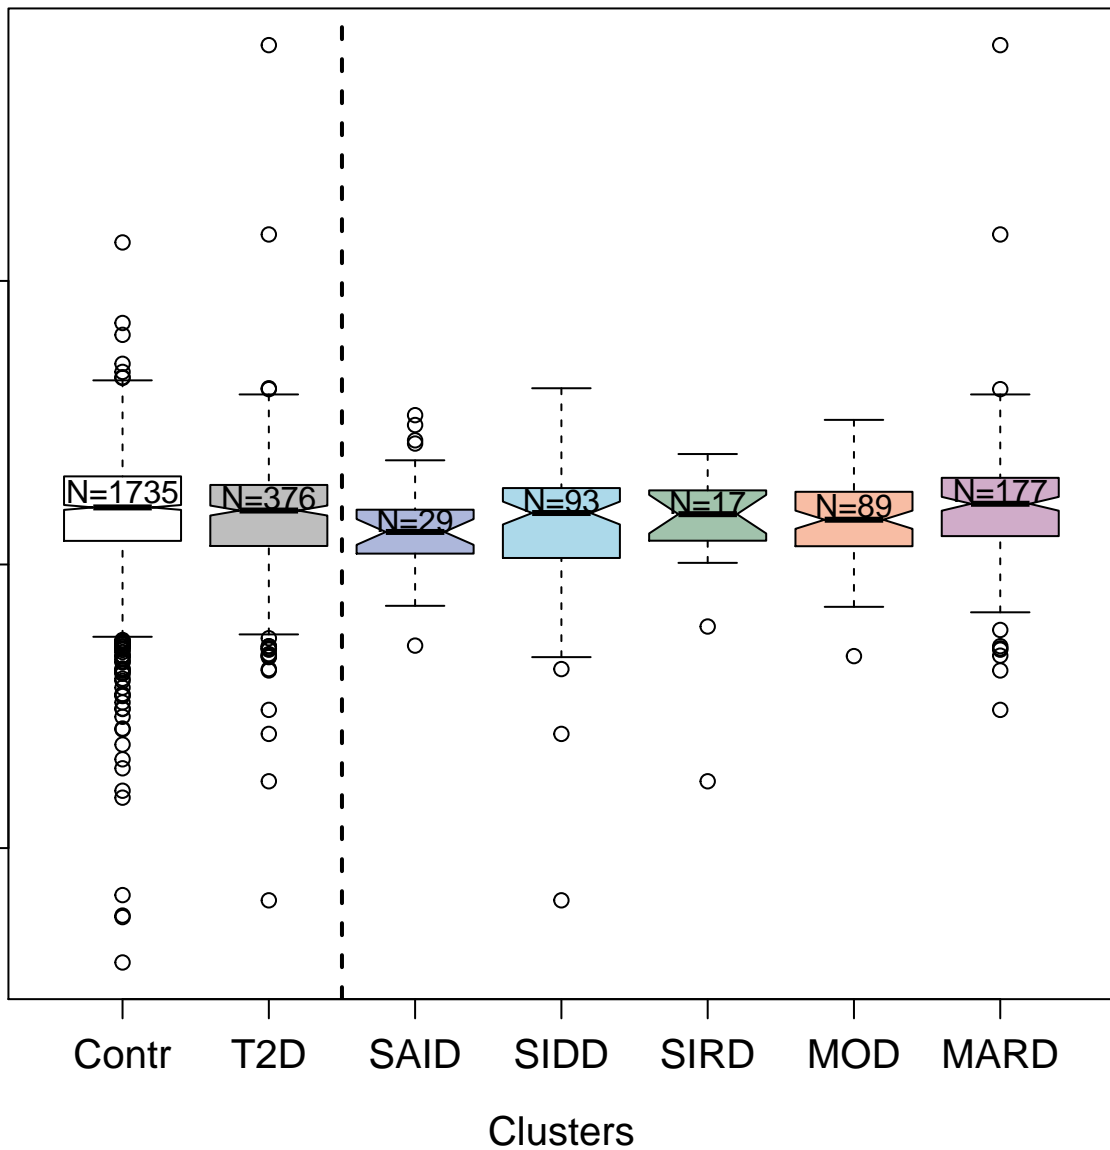

3587-53\_2 : Bone morphogenetic protein 10

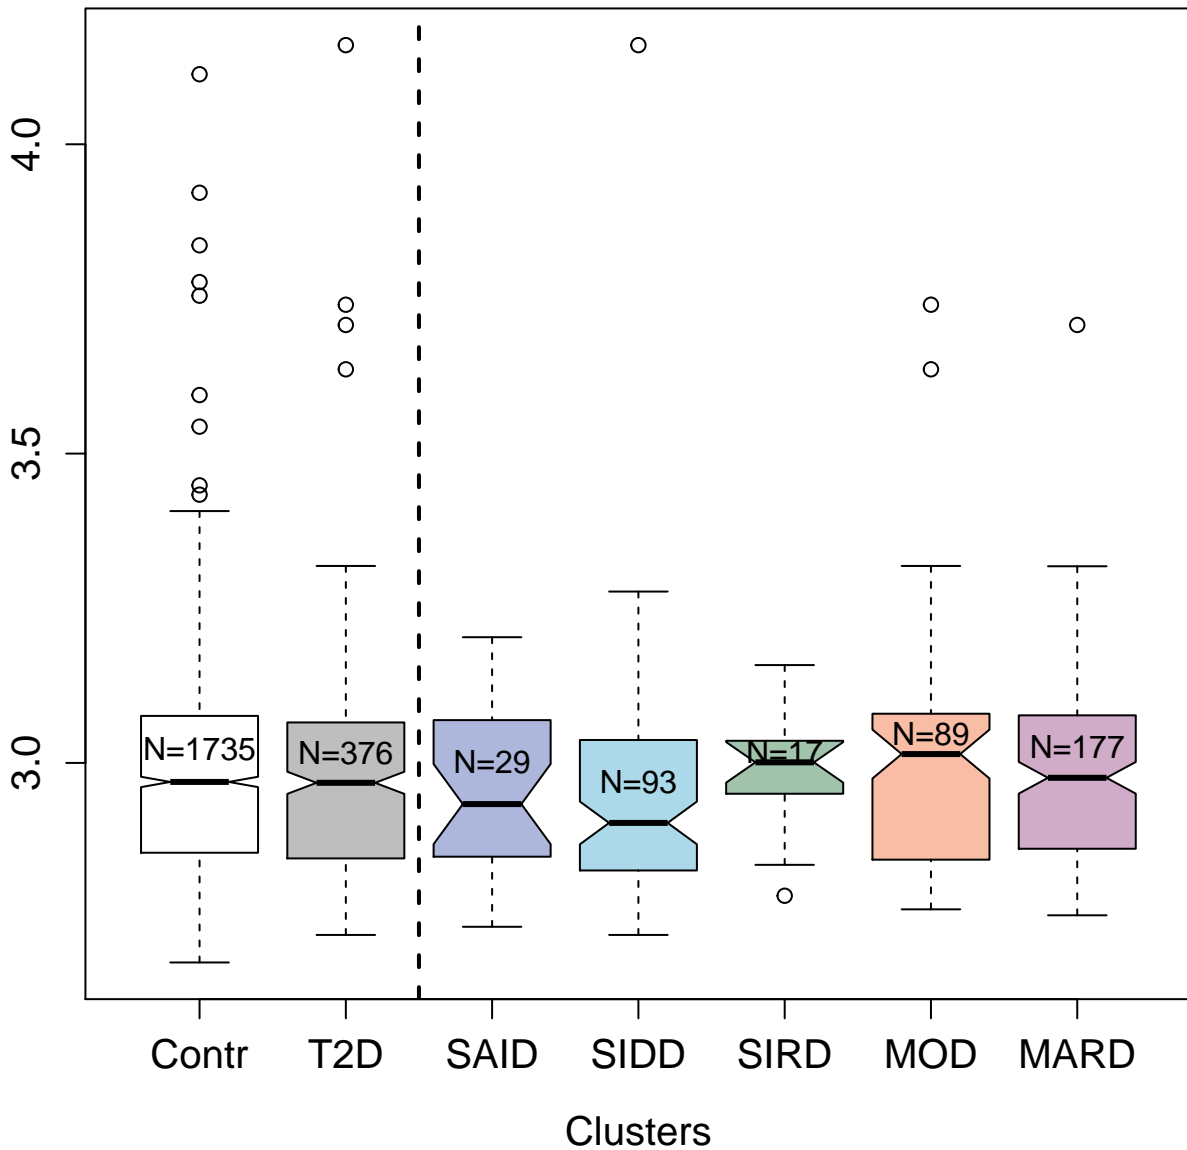

4332-6\_2 : C-type lectin domain family 1 member B

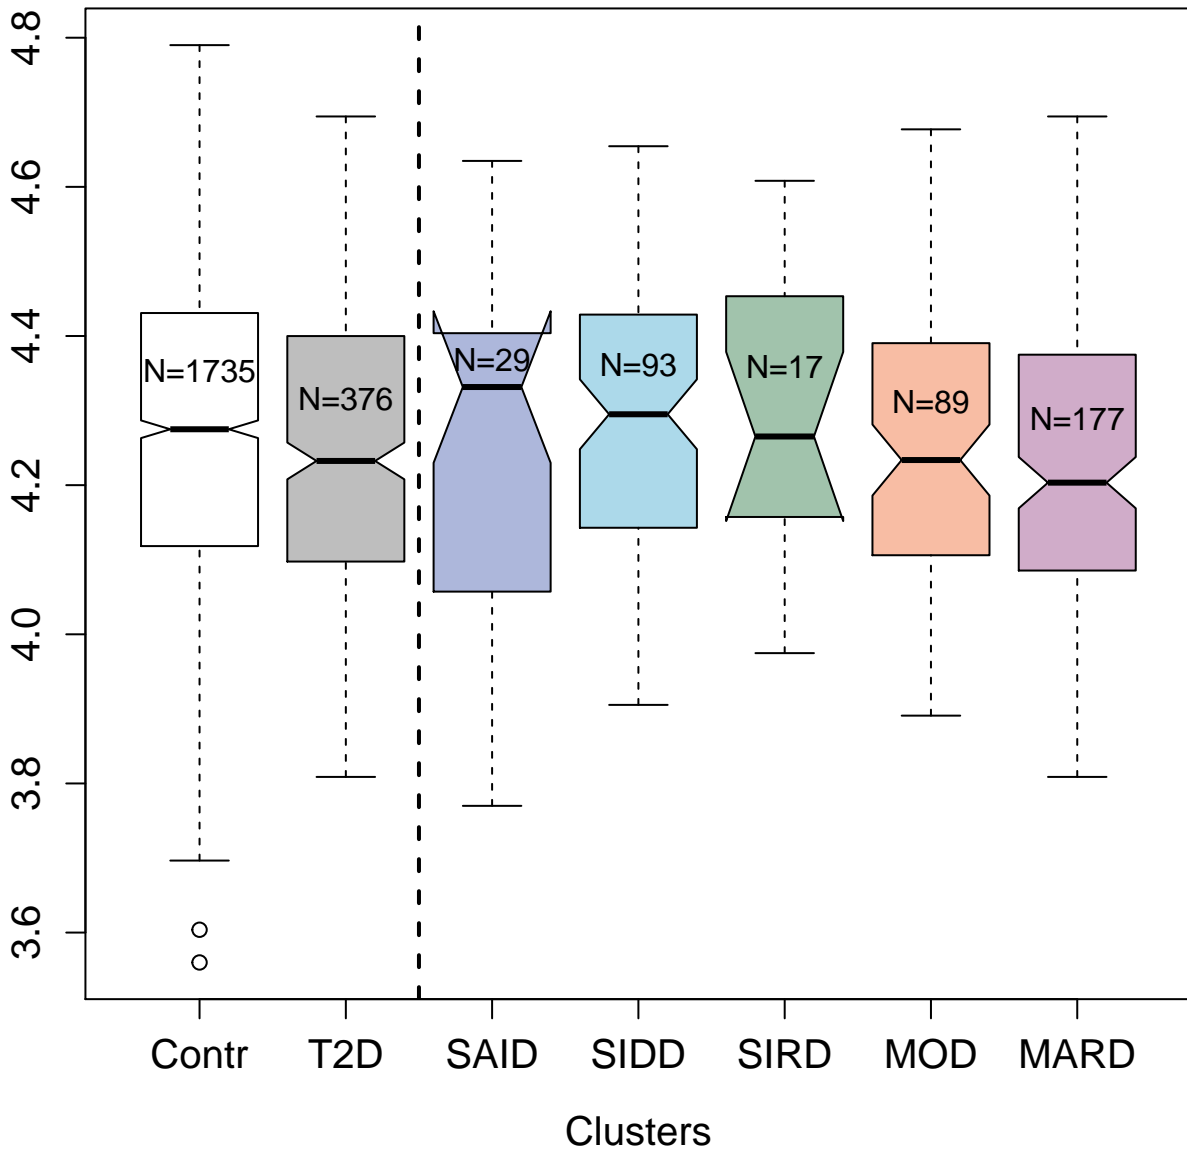

4258-15\_2 : Proliferation-associated protein 2G4

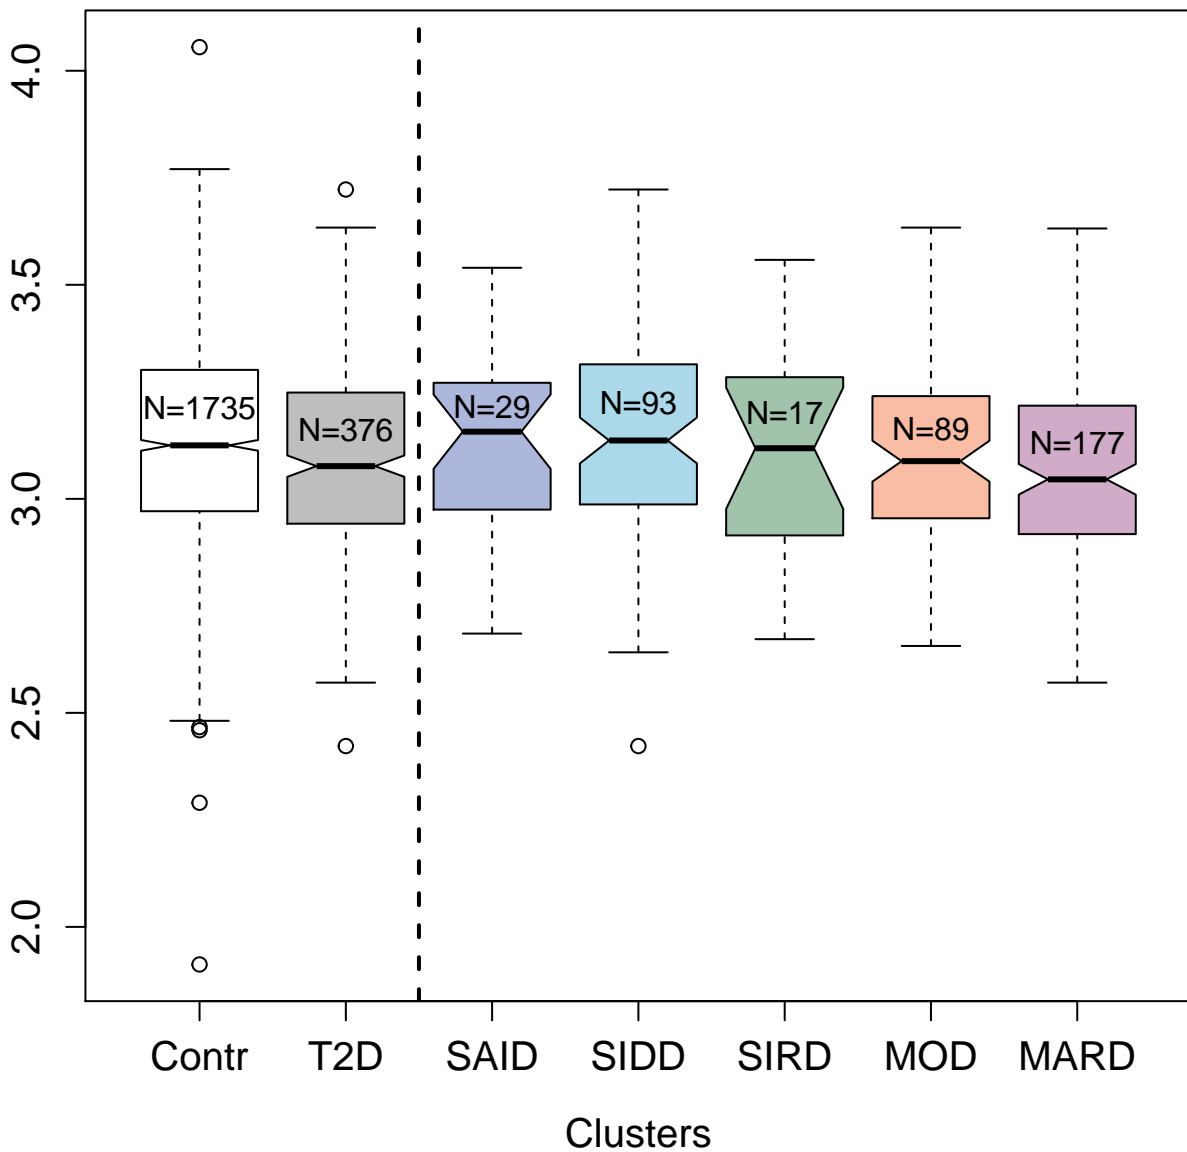



3839-60\_2 : AH receptor-interacting protein

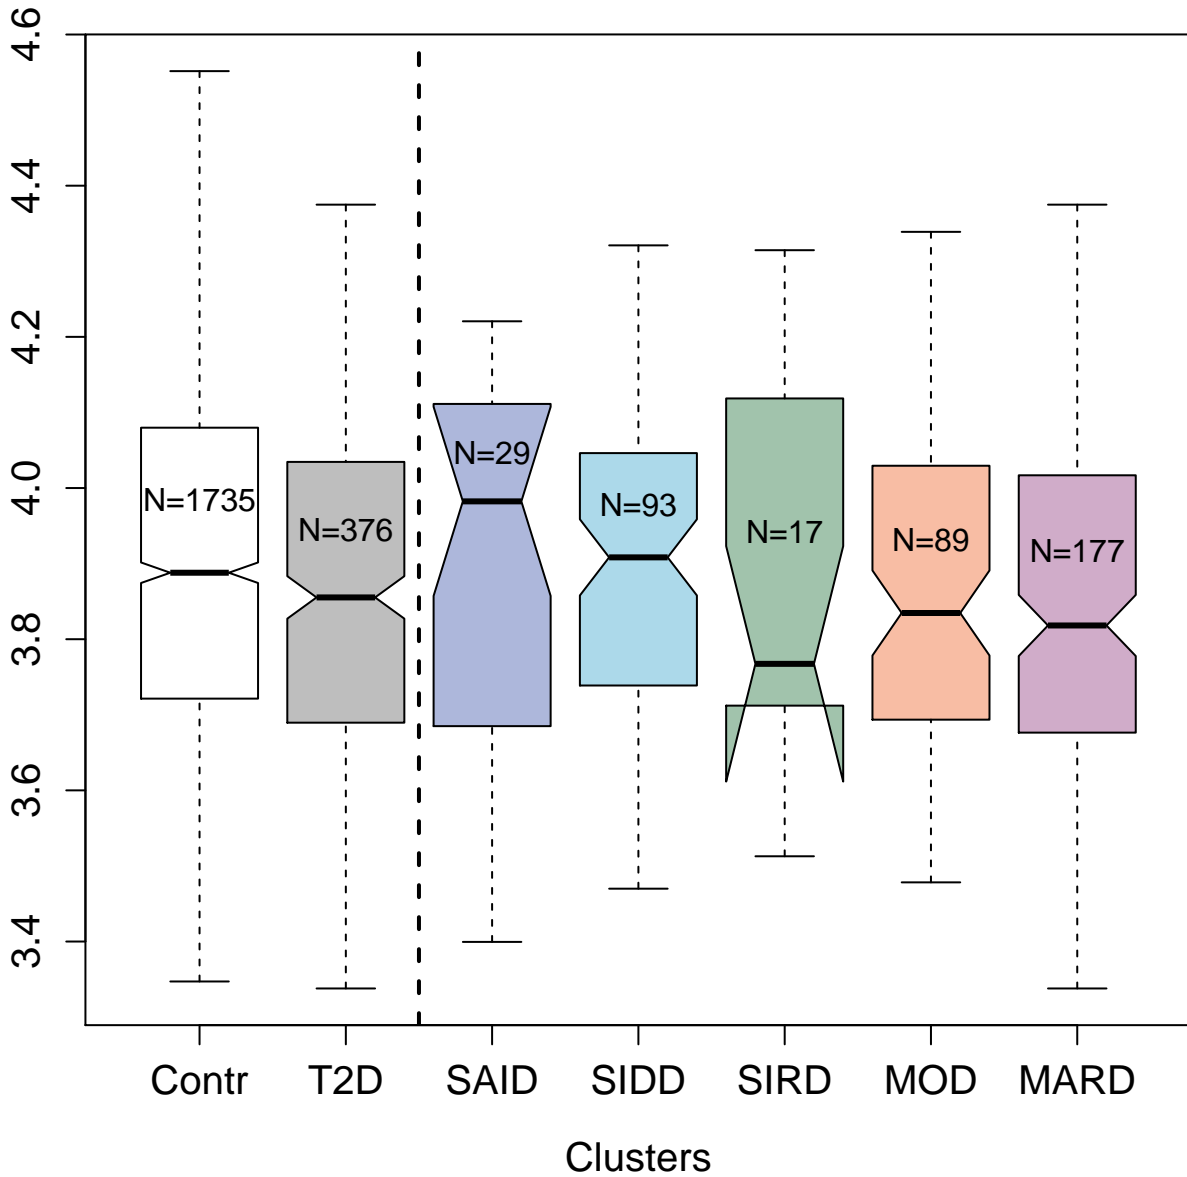

3815-14\_1 : Interleukin-12 receptor subunit

beta-2

3.0 3.5 4.0 4.5 5.0

Contr

T2D

SAID

SIDD

SIRD

MOD

MARD

Clusters

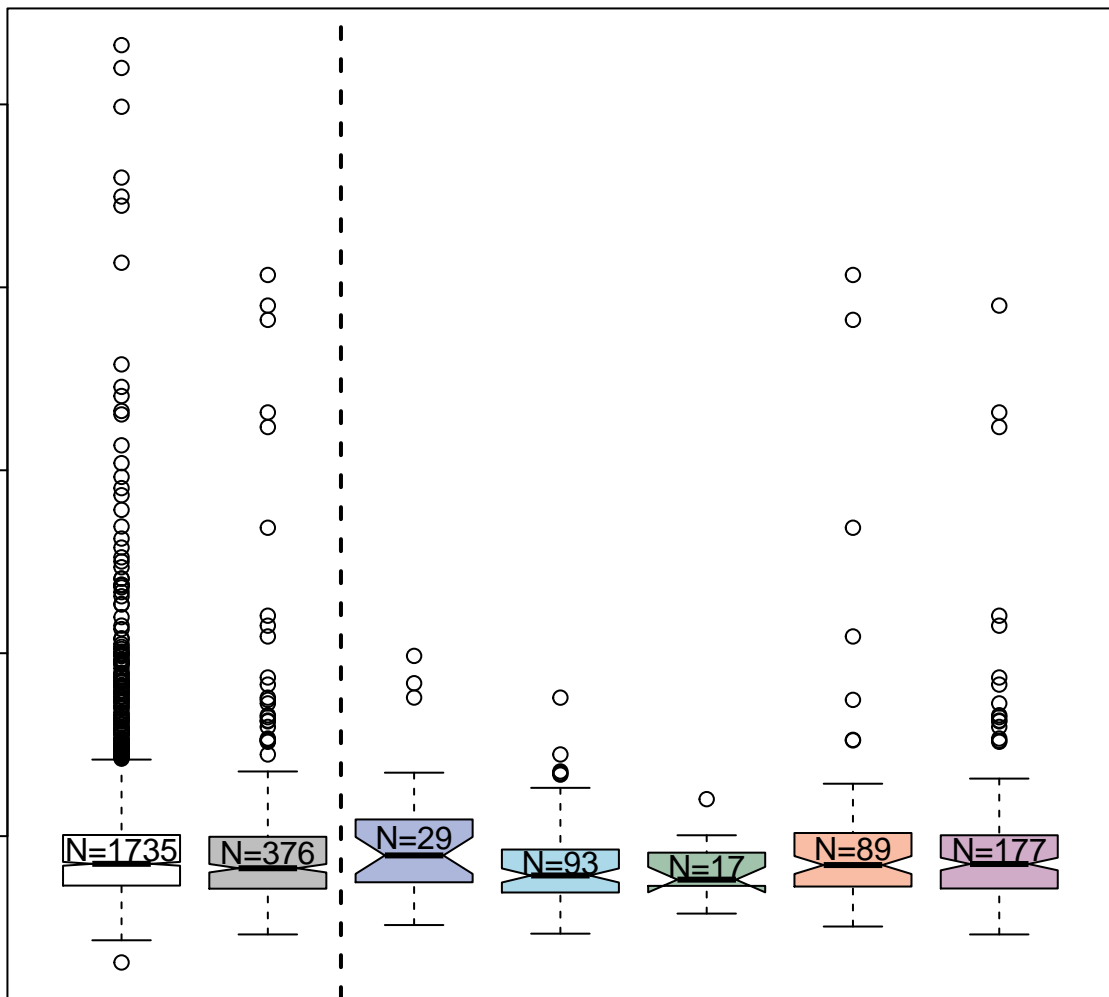

2997-8\_1 : Junctional adhesion molecule B

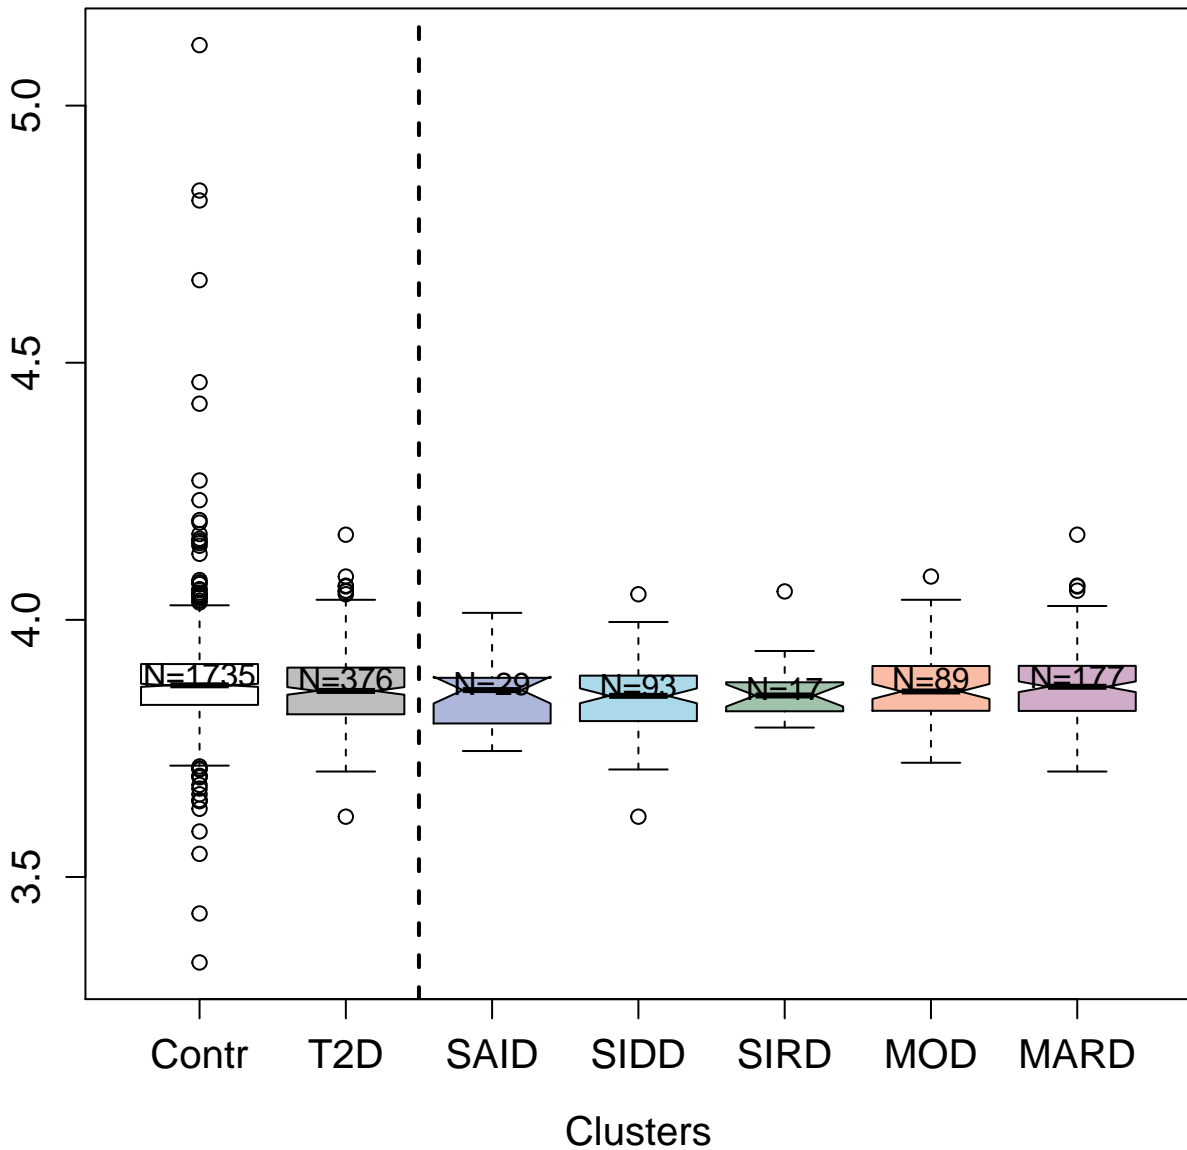

2637-77\_2 : Macrophage mannose receptor 1

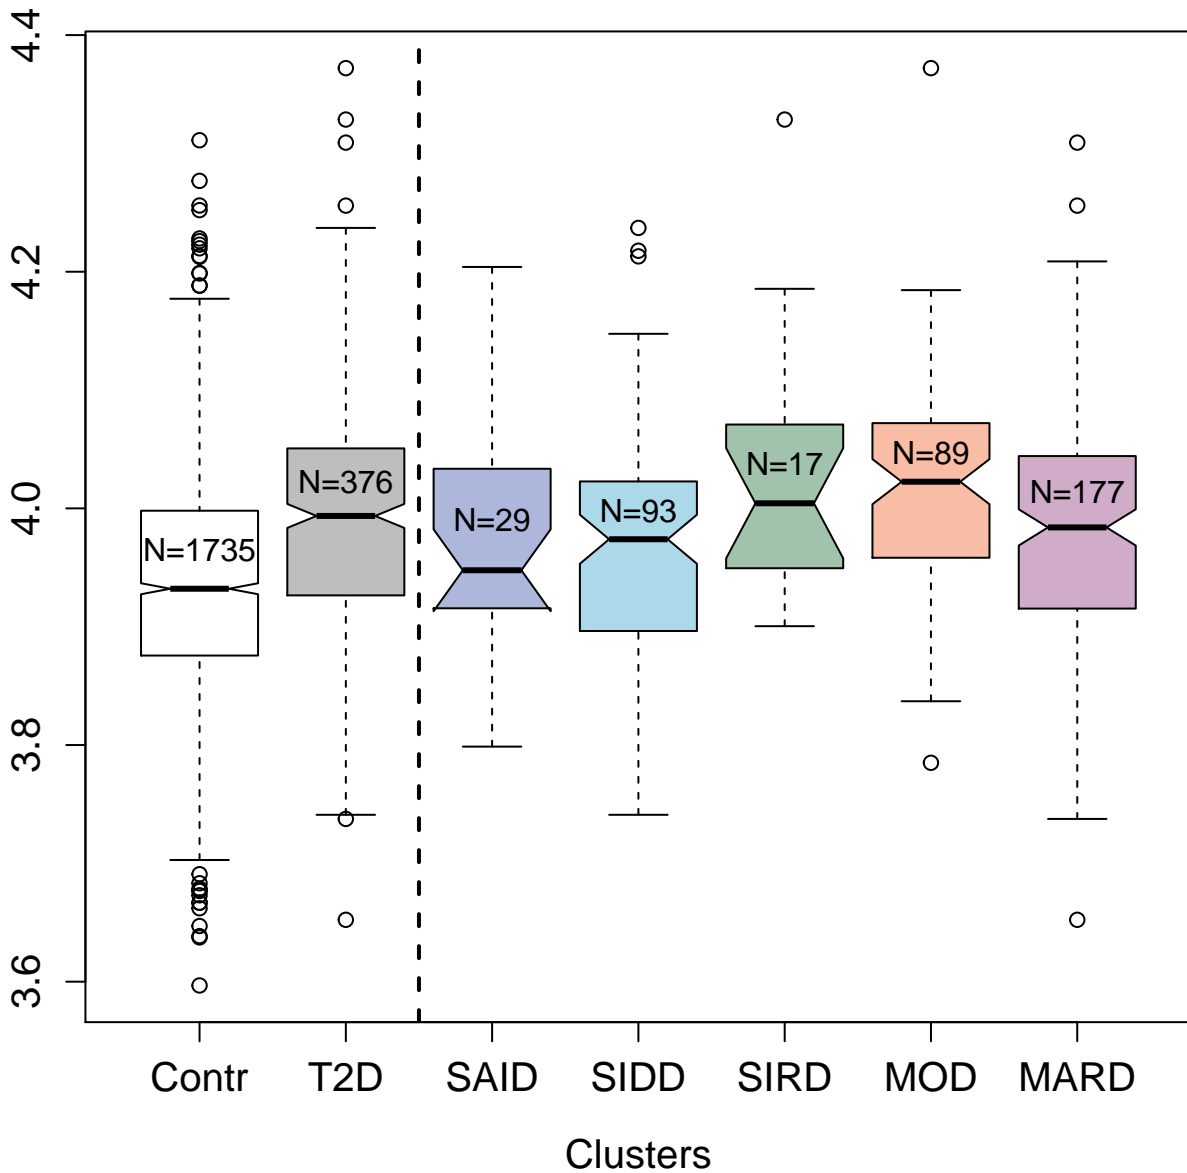

3506-49\_1 : Lymphotoxin alpha2:beta1

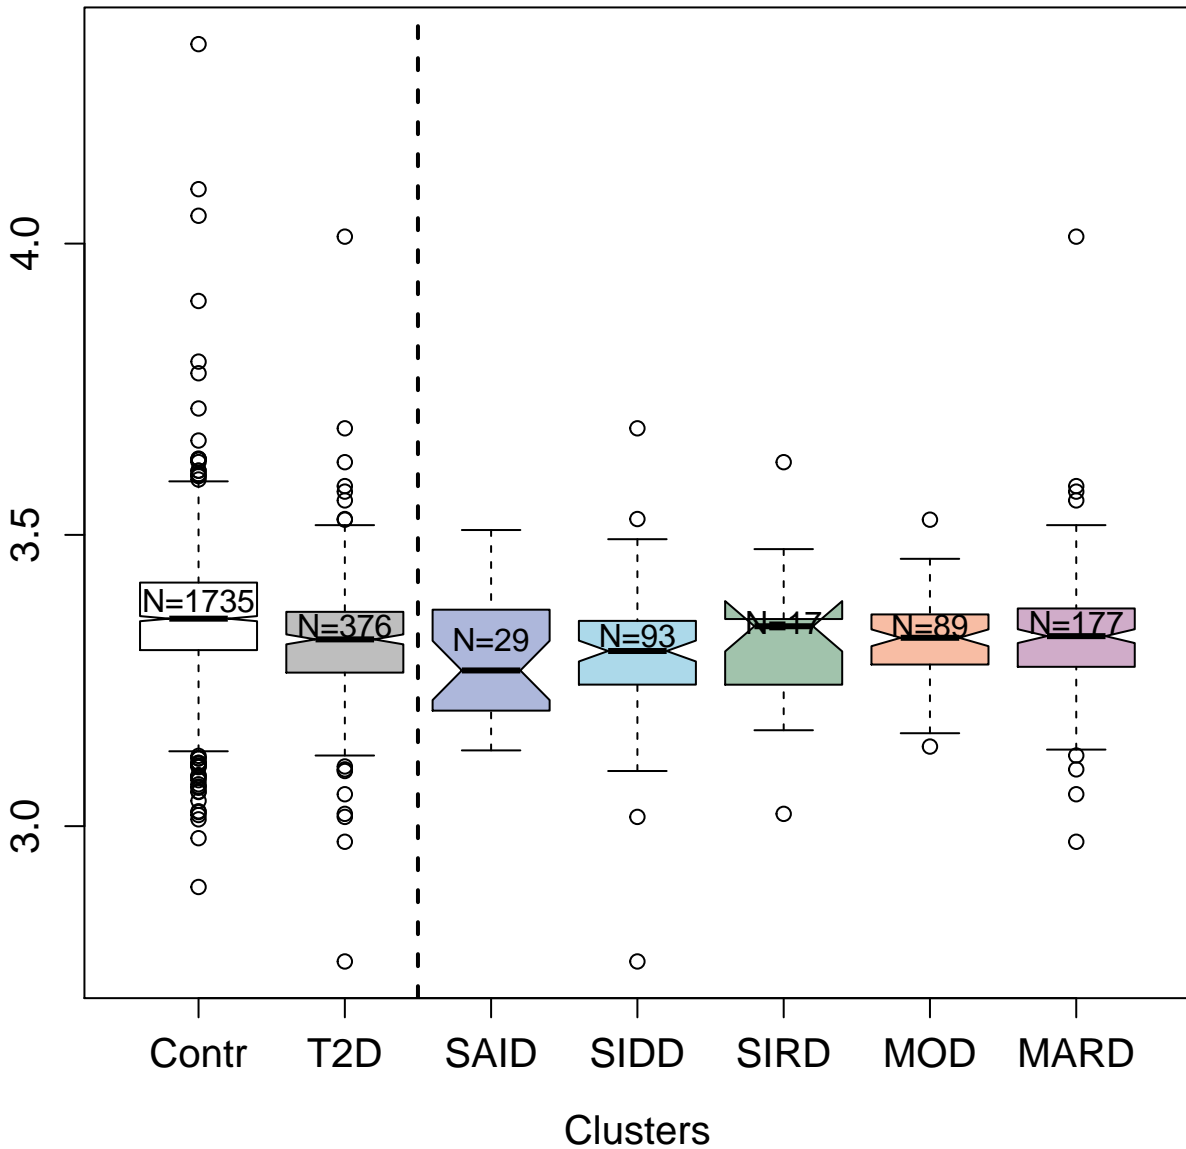

3905-62\_1 : Ubiquitin-conjugating enzyme E2 N

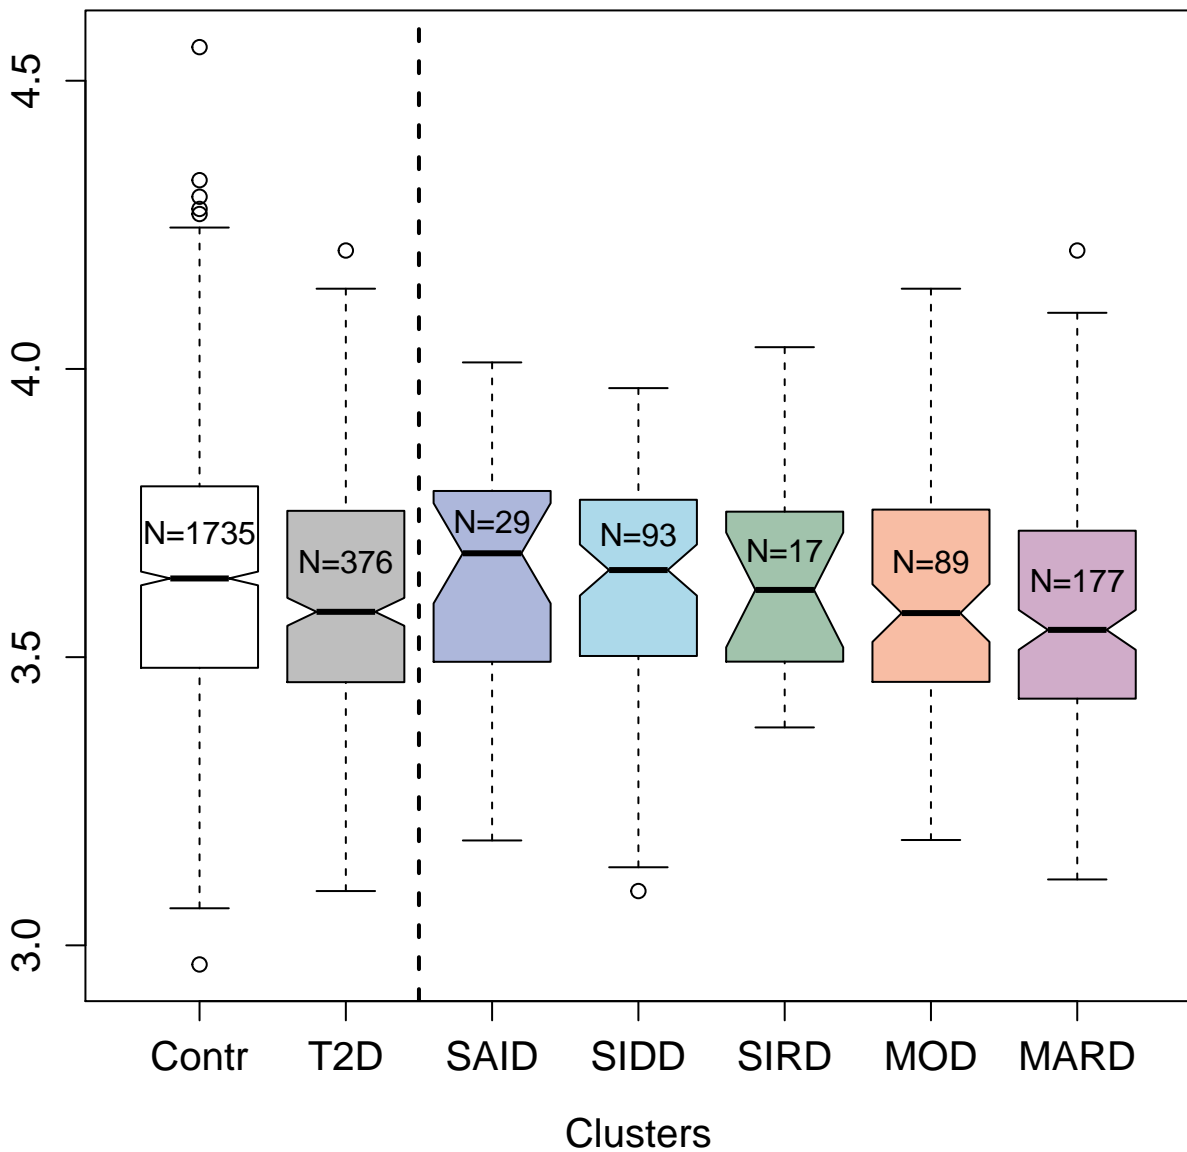

5012-67\_1 : Adenylate kinase isoenzyme 1

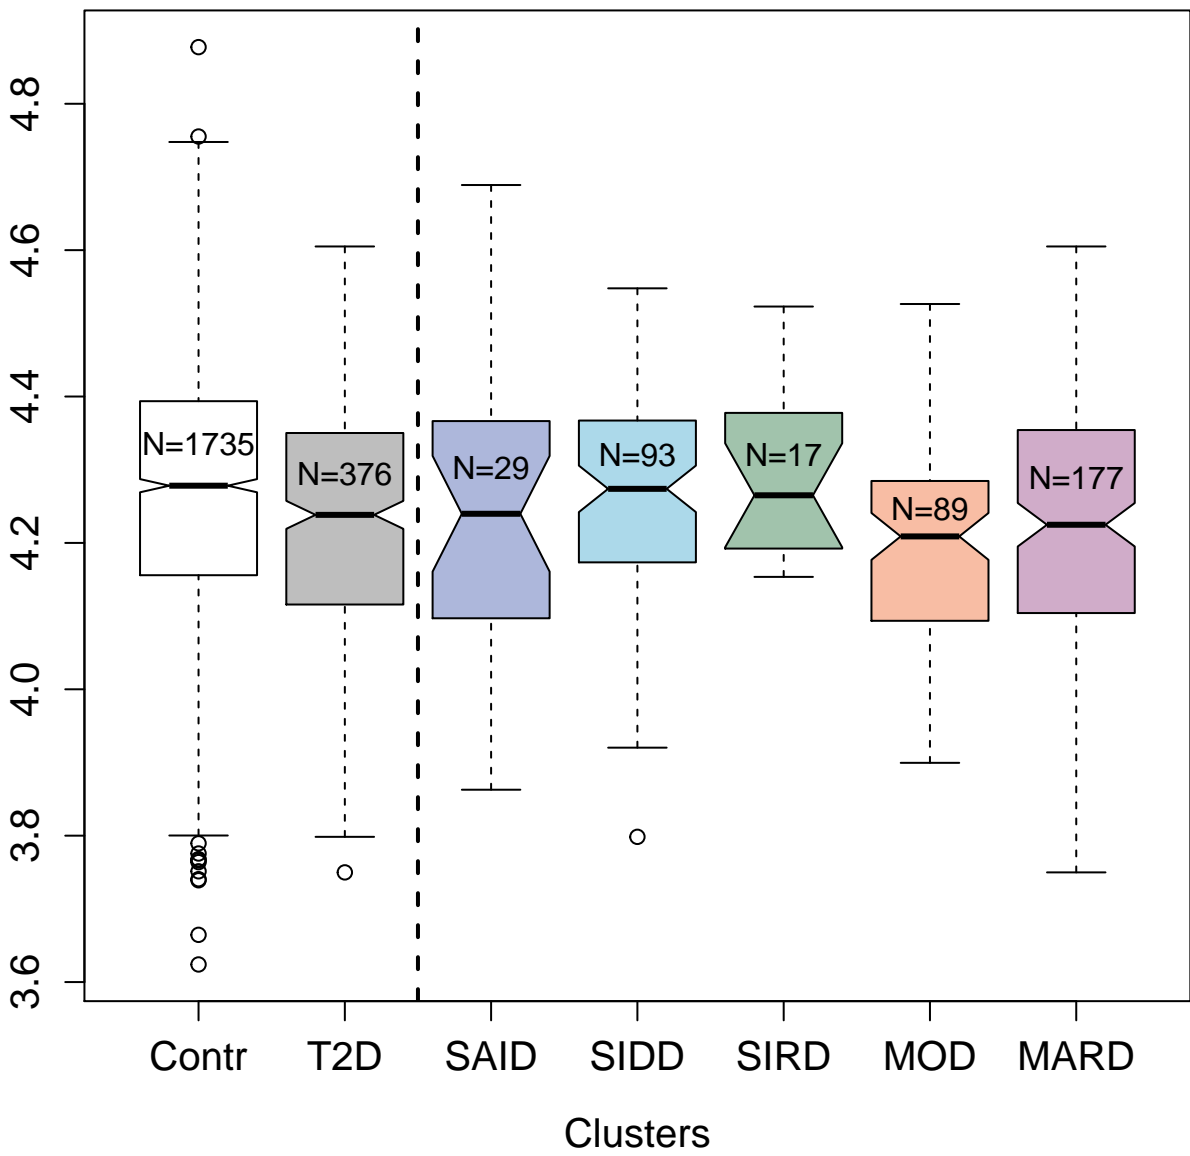

3866-7\_2 : Ribosome maturation protein SBDS

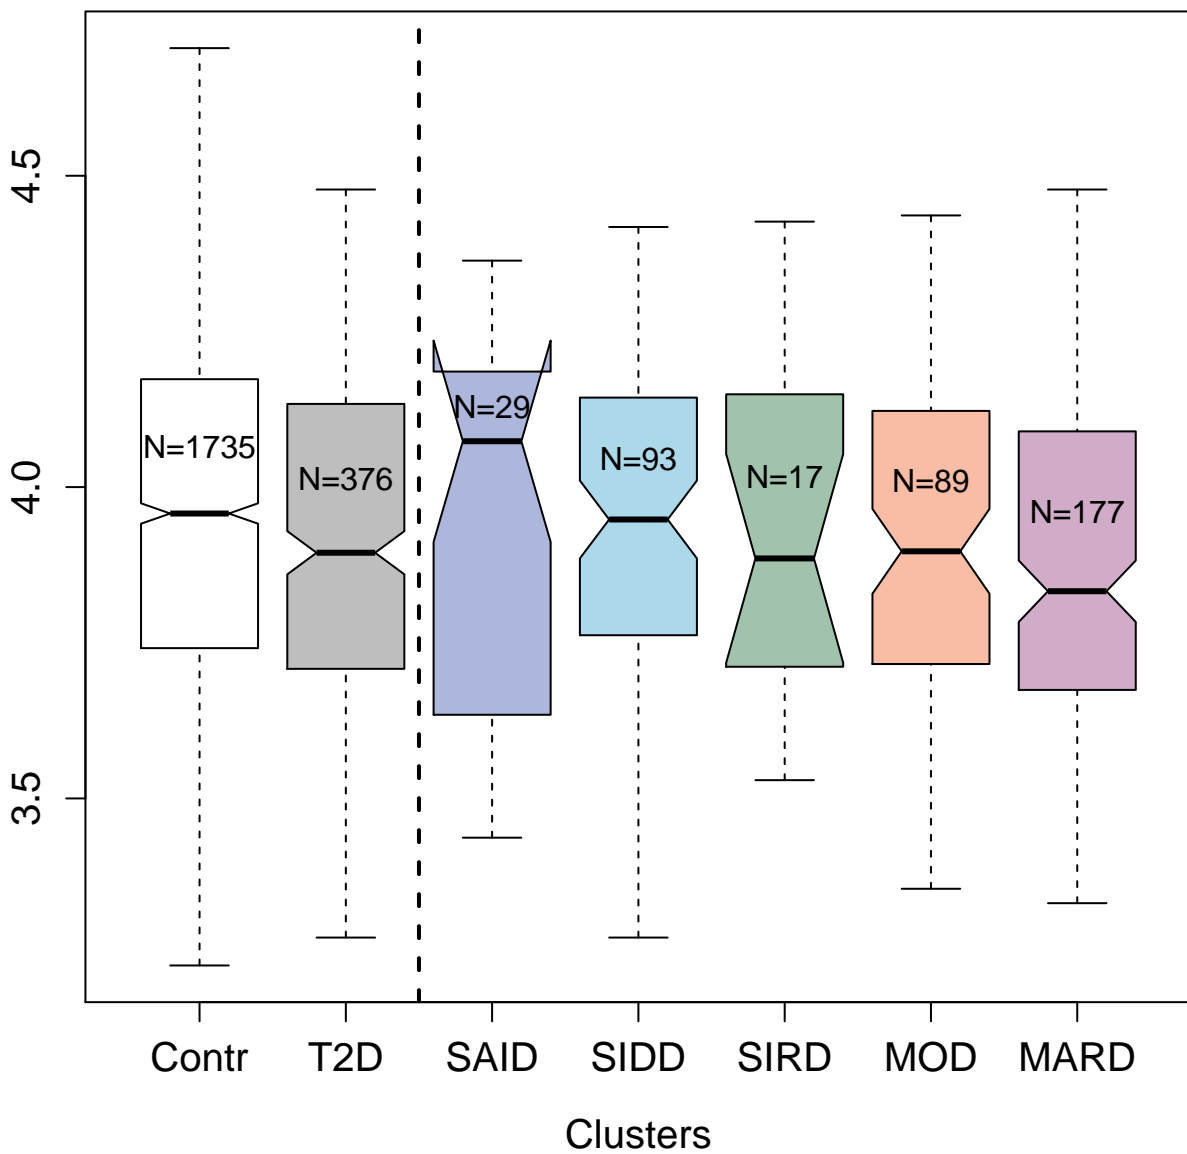



3294-55\_2 : Cryptic protein

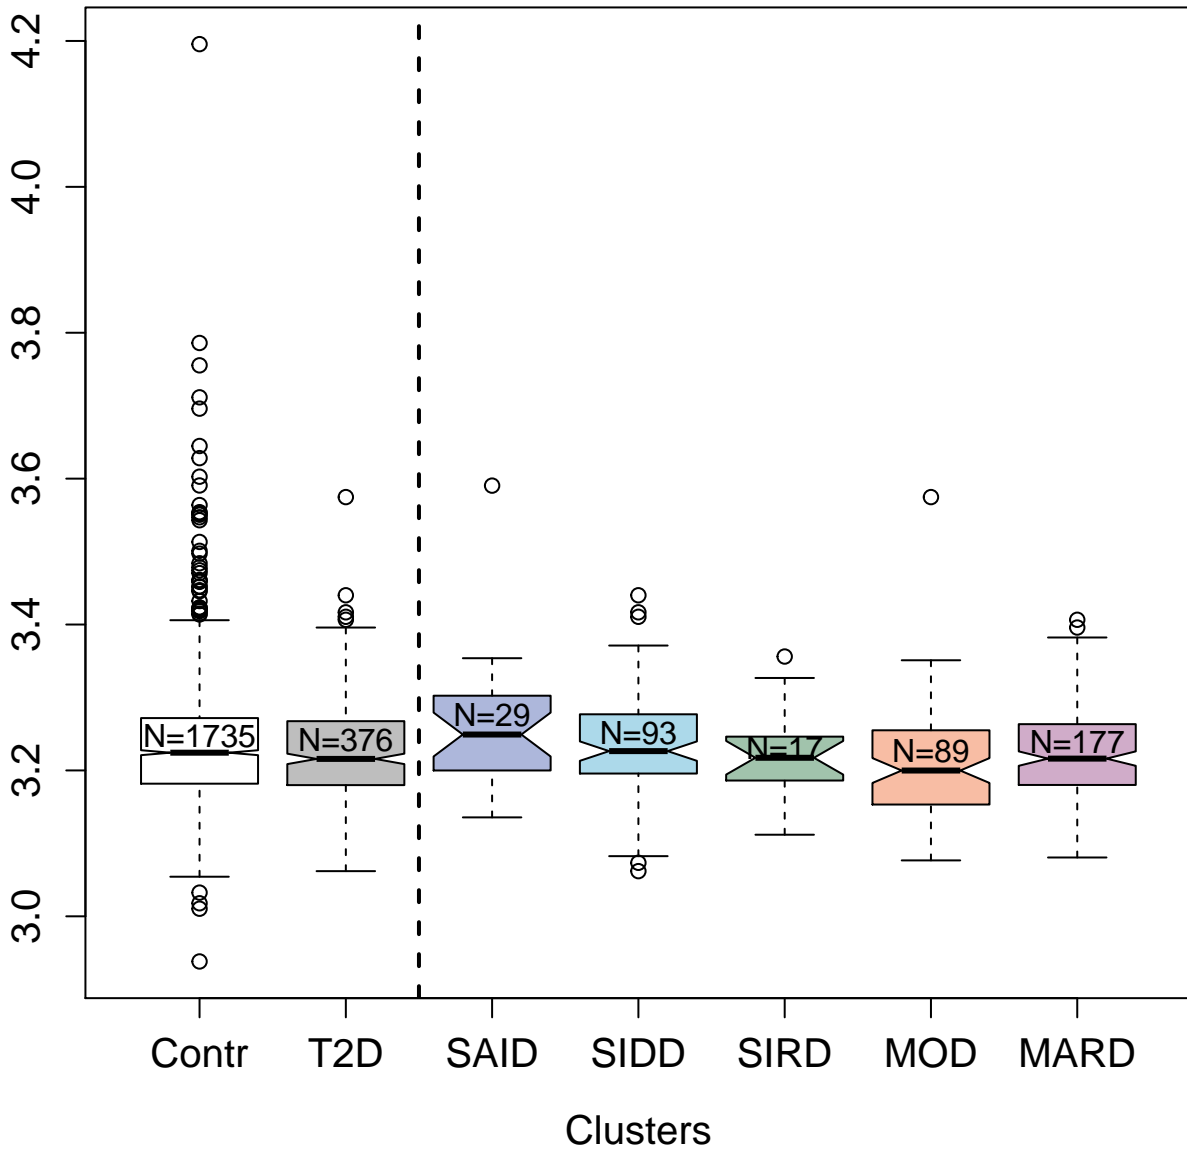

5480-49\_3 : C-C motif chemokine 5

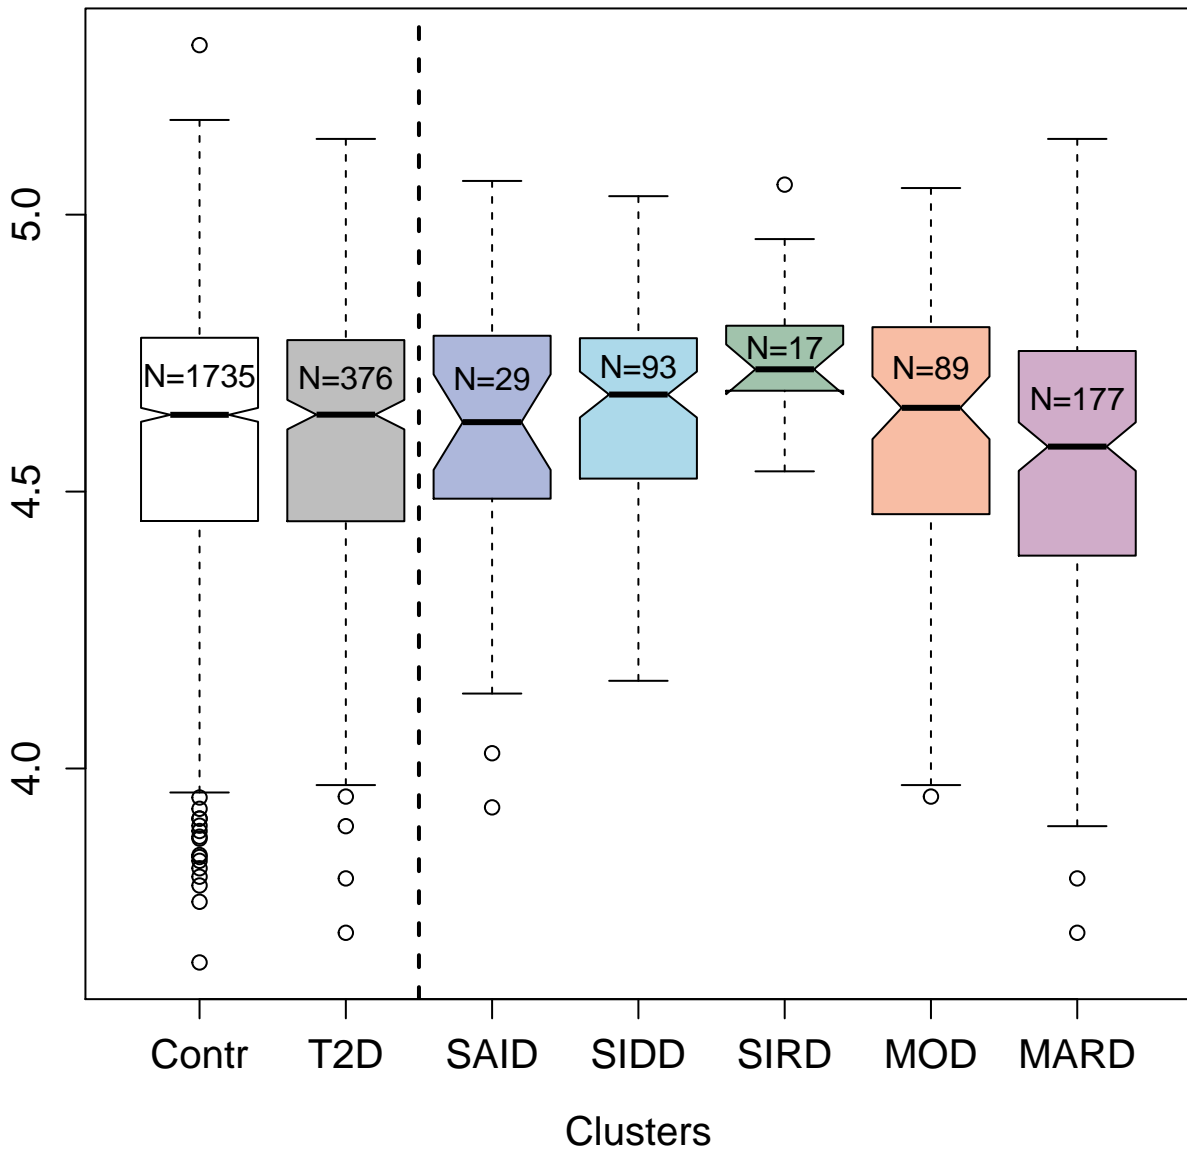

5487-7\_3 : SLAM family member 7

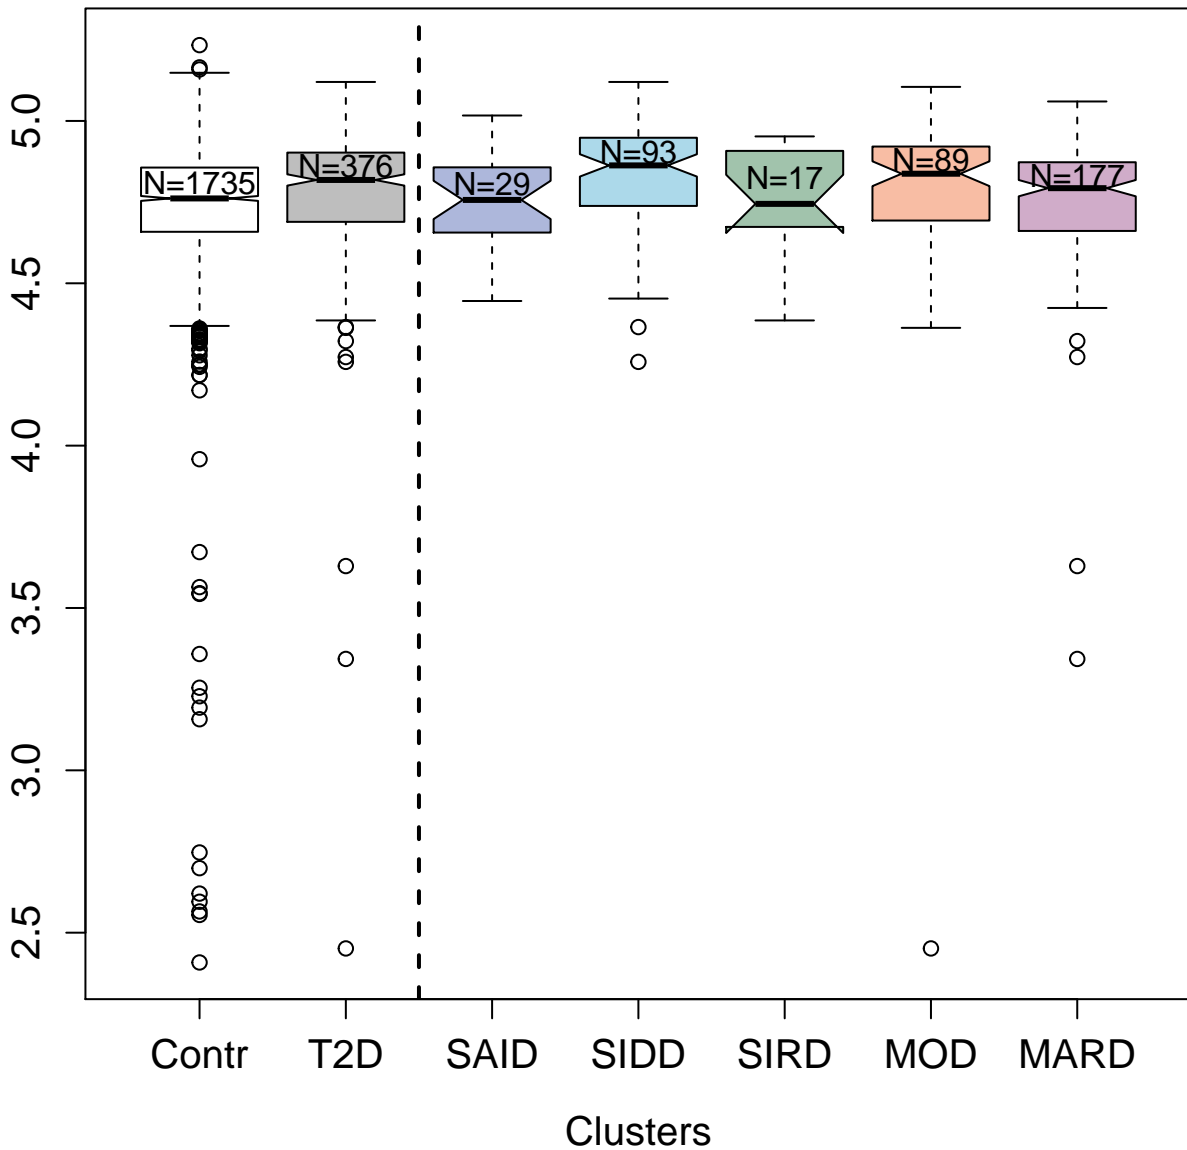

5272-55\_2 : SHC-transforming protein 1

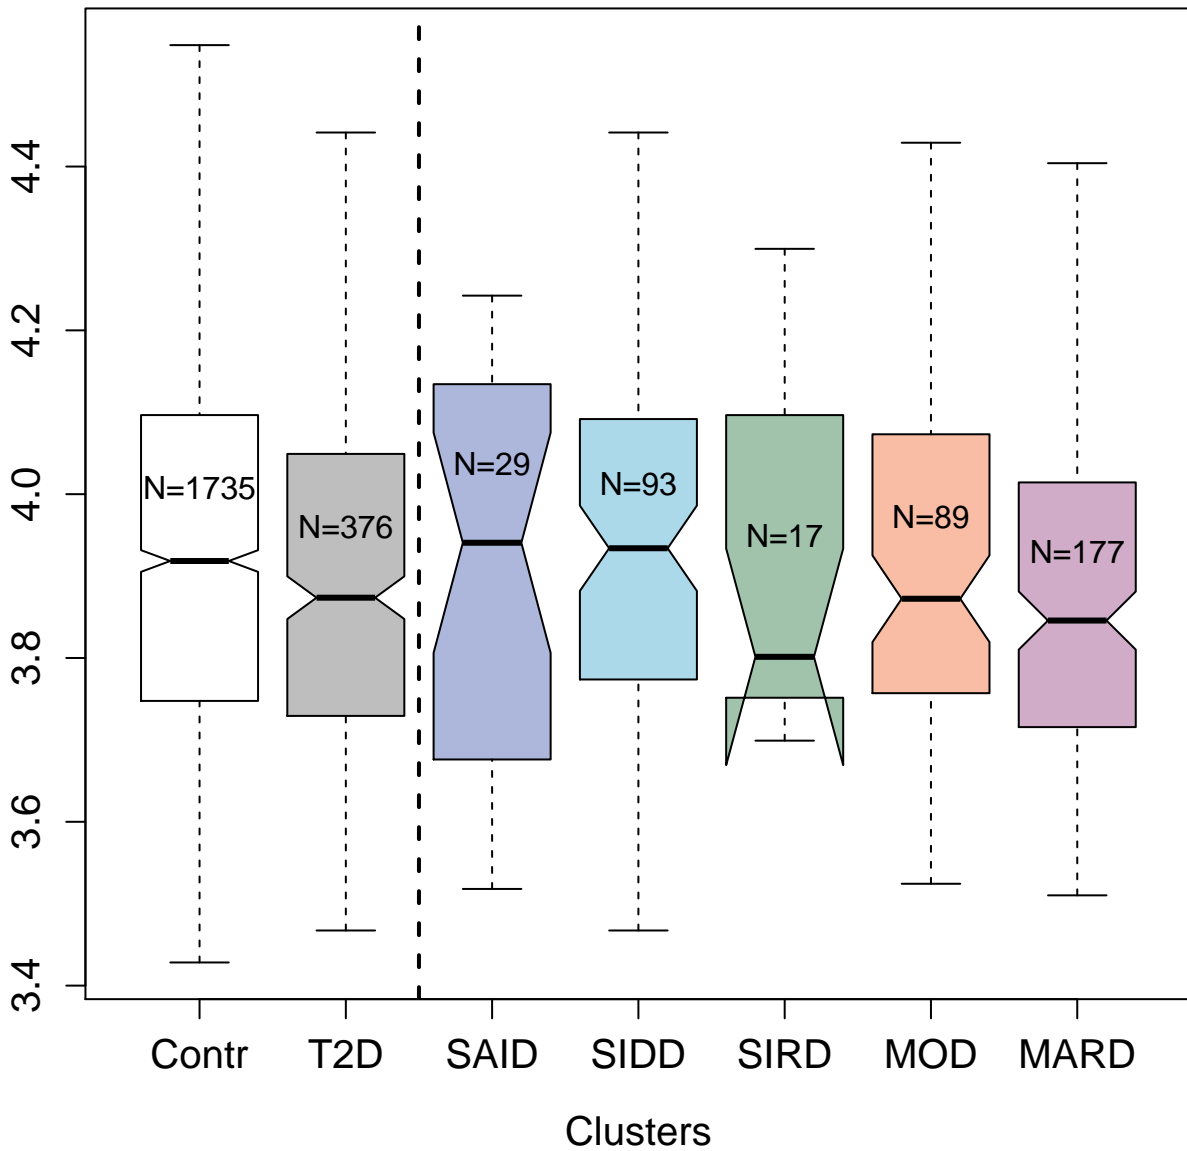

3799-11\_2 : Carbonic anhydrase 3

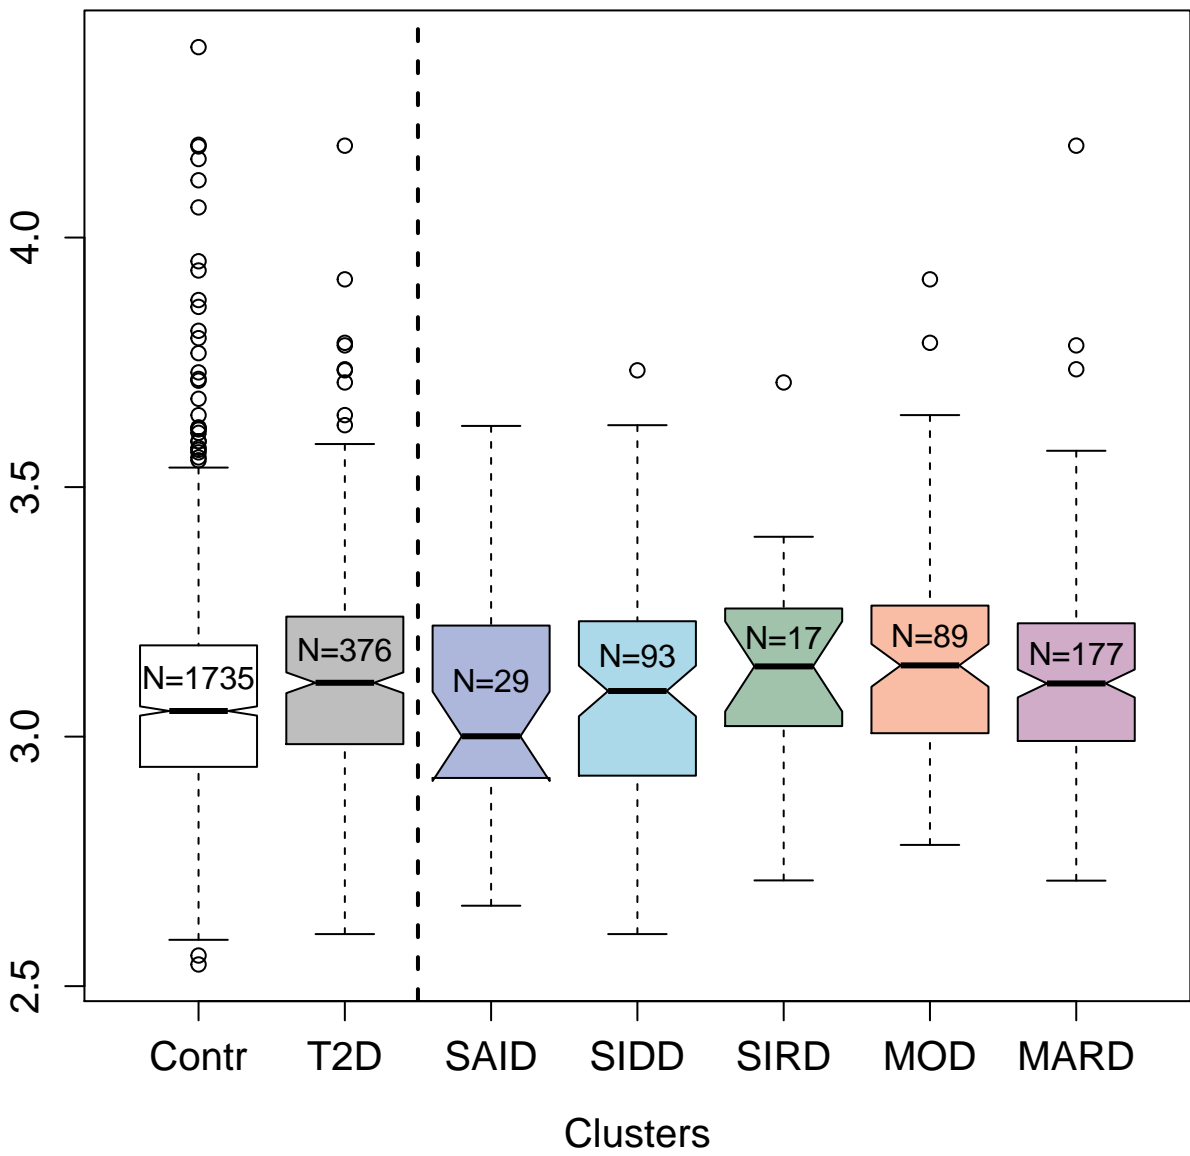

2950-57\_2 : Insulin-like growth factor-binding

protein 4

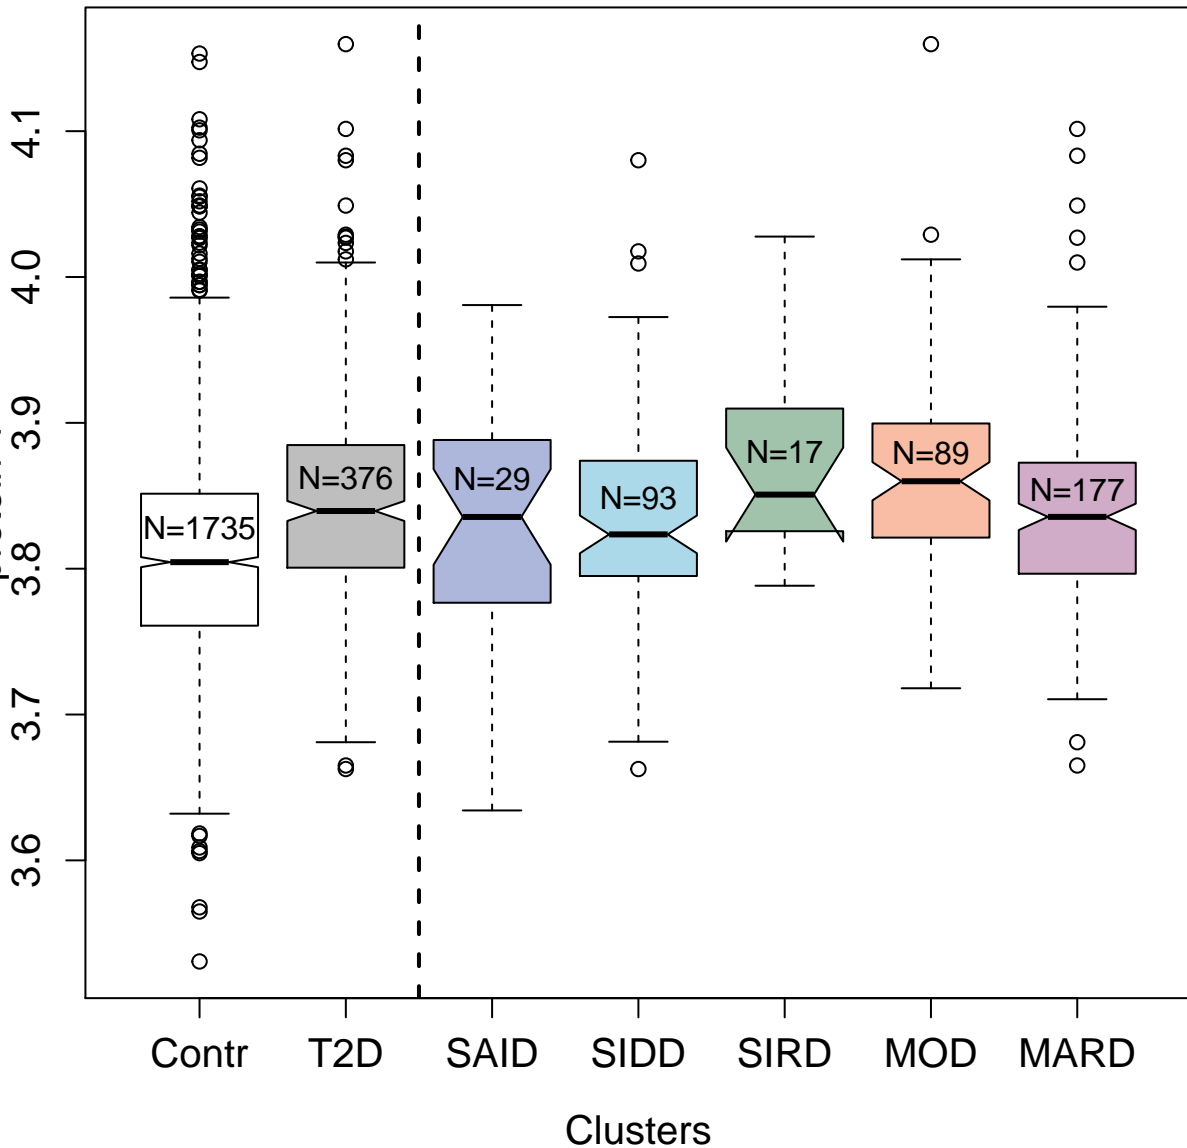

5105-2\_3 : Reticulon-4 receptor

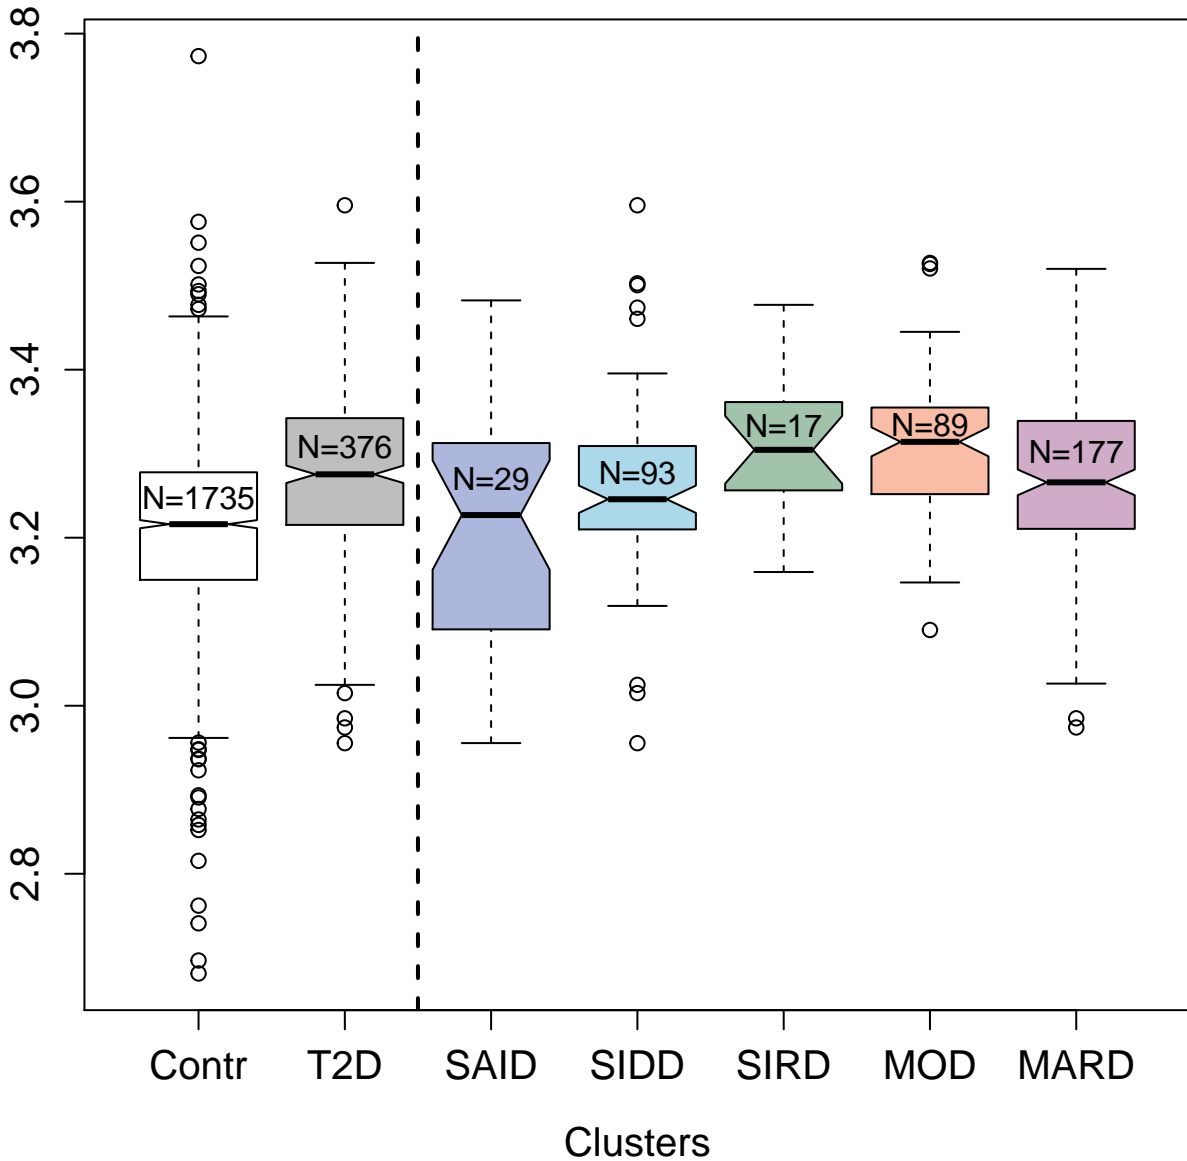

3822-54\_2 : MAP kinase-activated protein kinase 3

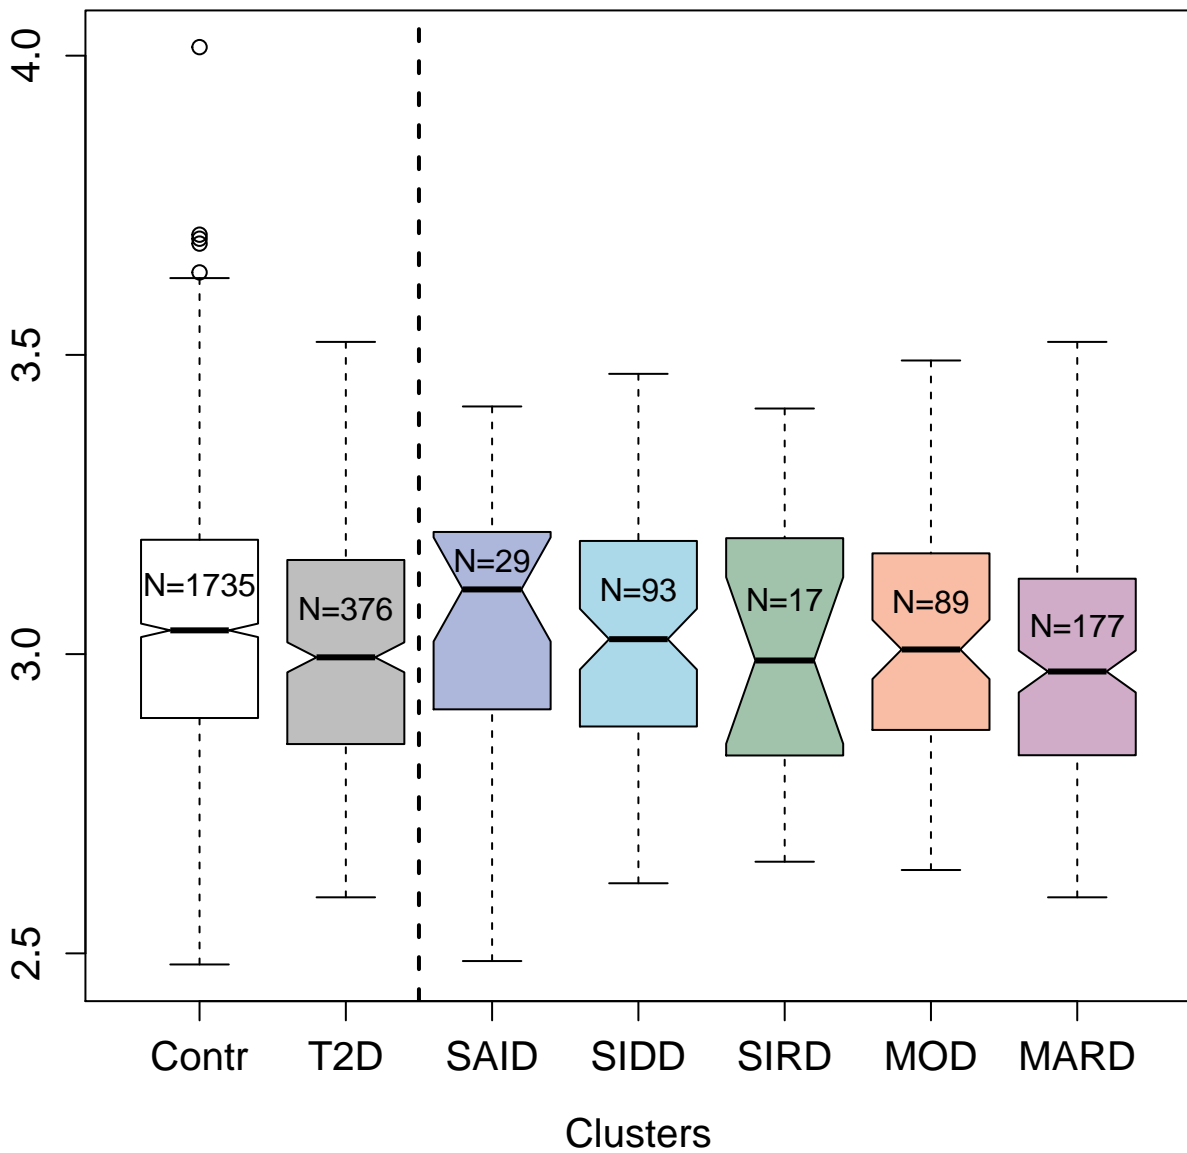



3495-15\_2 : C-X-C motif chemokine 6

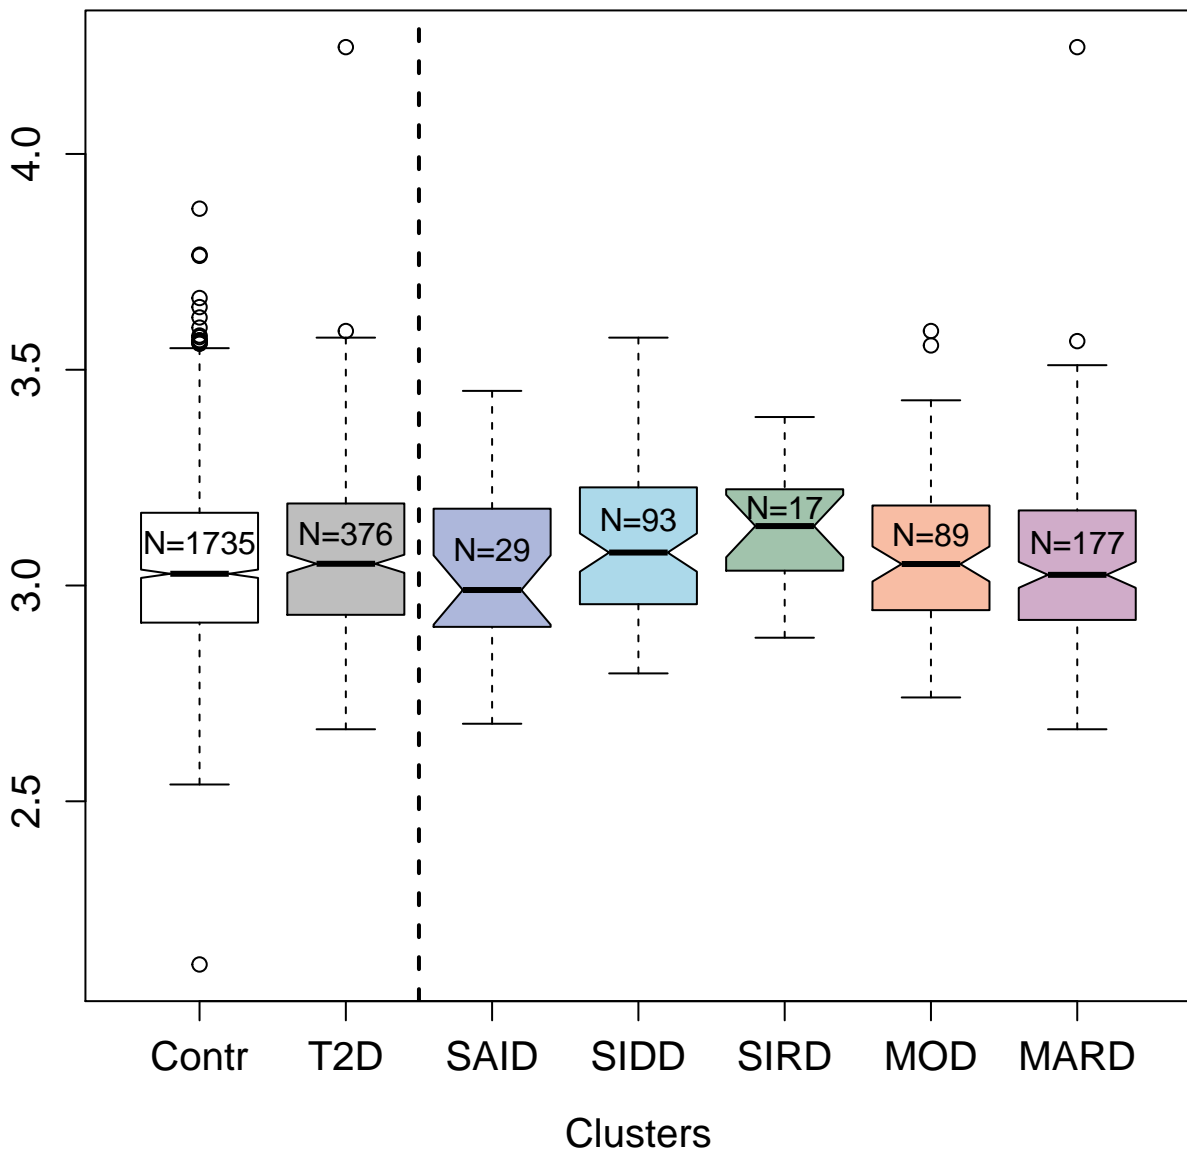

3902-21\_2 : S-phase kinase-associated protein 1

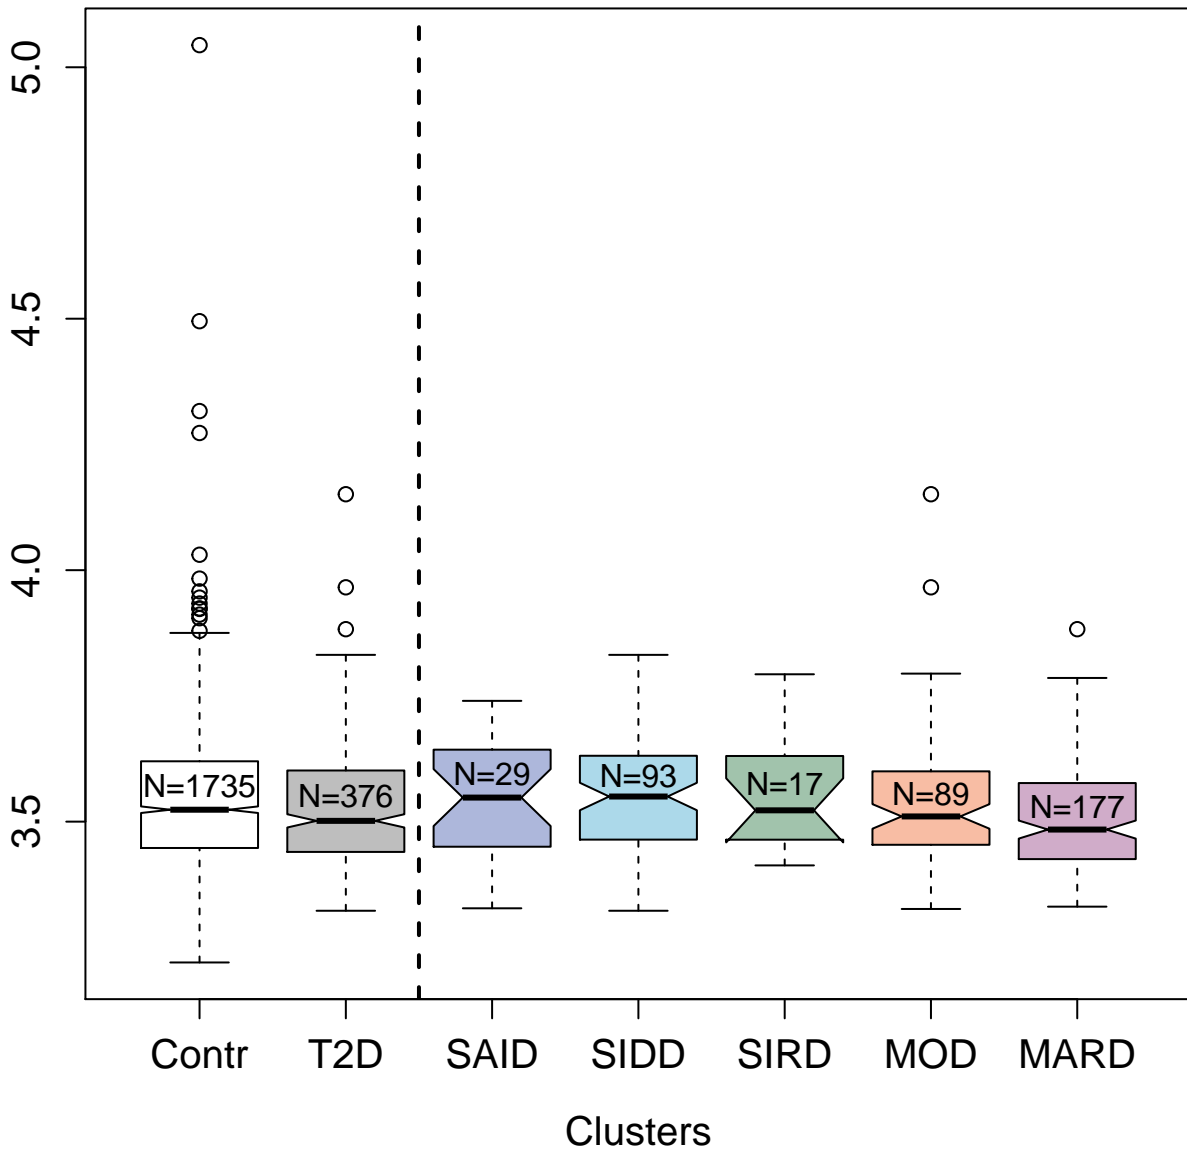

2475-1\_3 : Mast/stem cell growth factor receptor

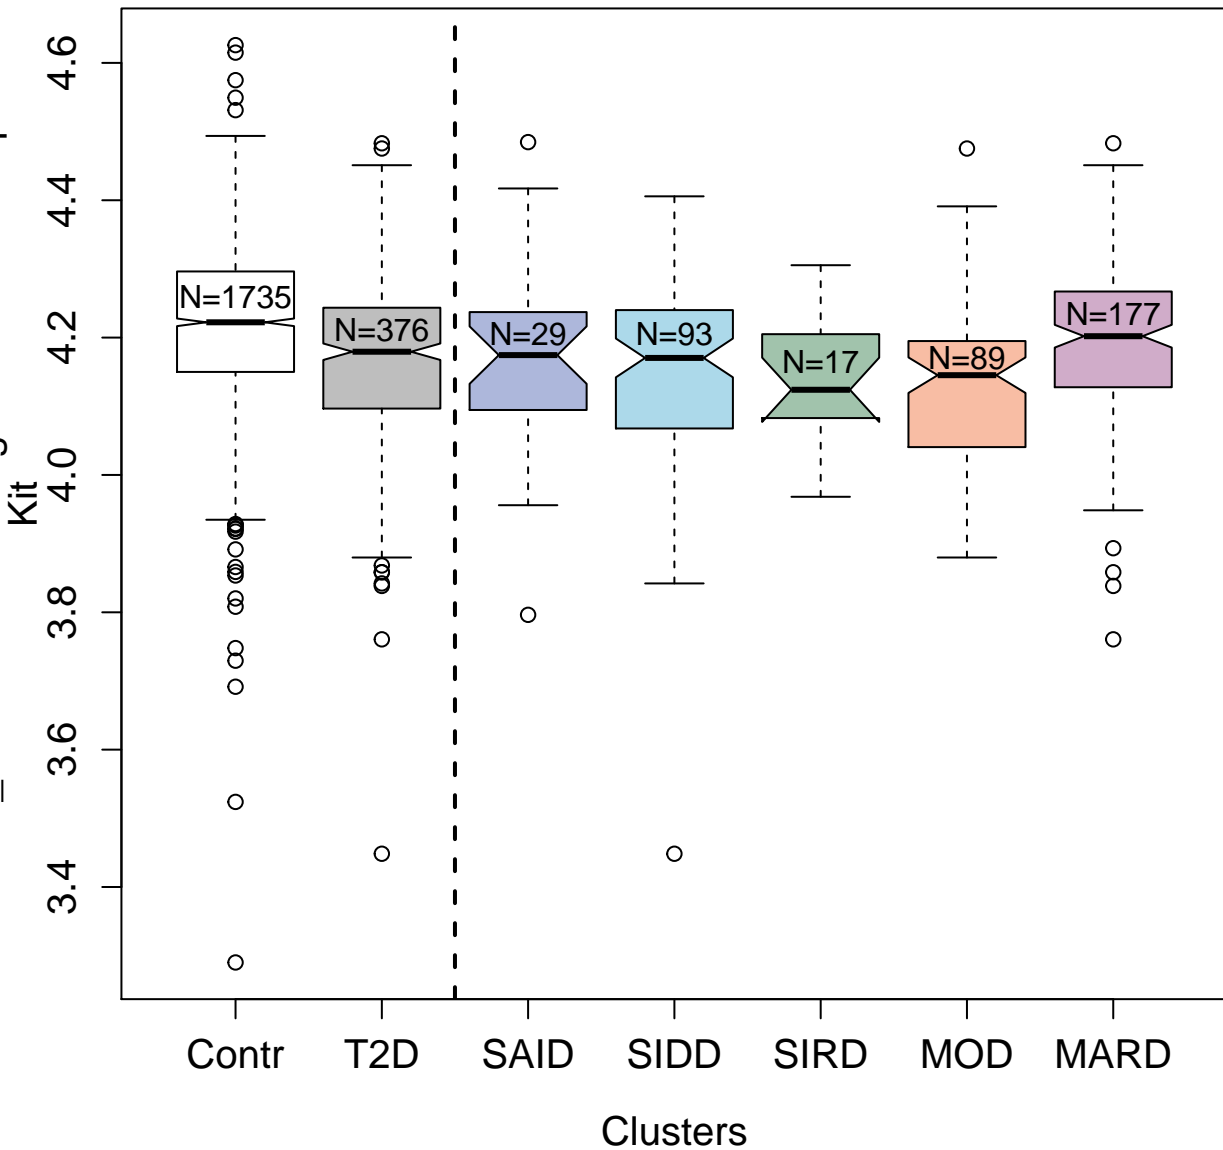

2642-4\_1 : Platelet-activating factor  
acetylhydrolase IB subunit beta

3.5  
4.0  
4.5  
5.0

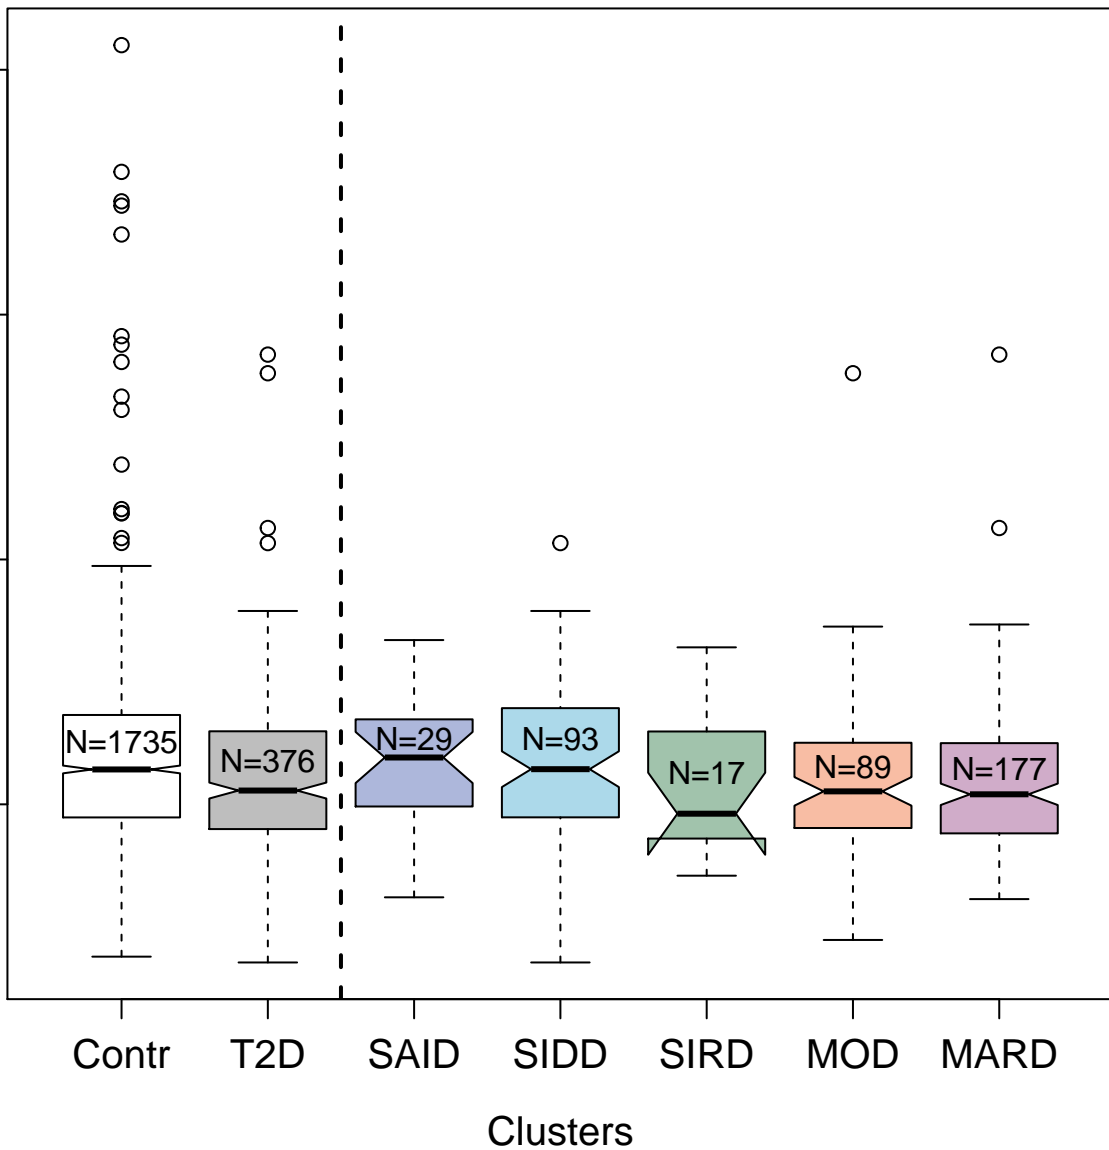

4544-4\_3 : Connective tissue-activating peptide

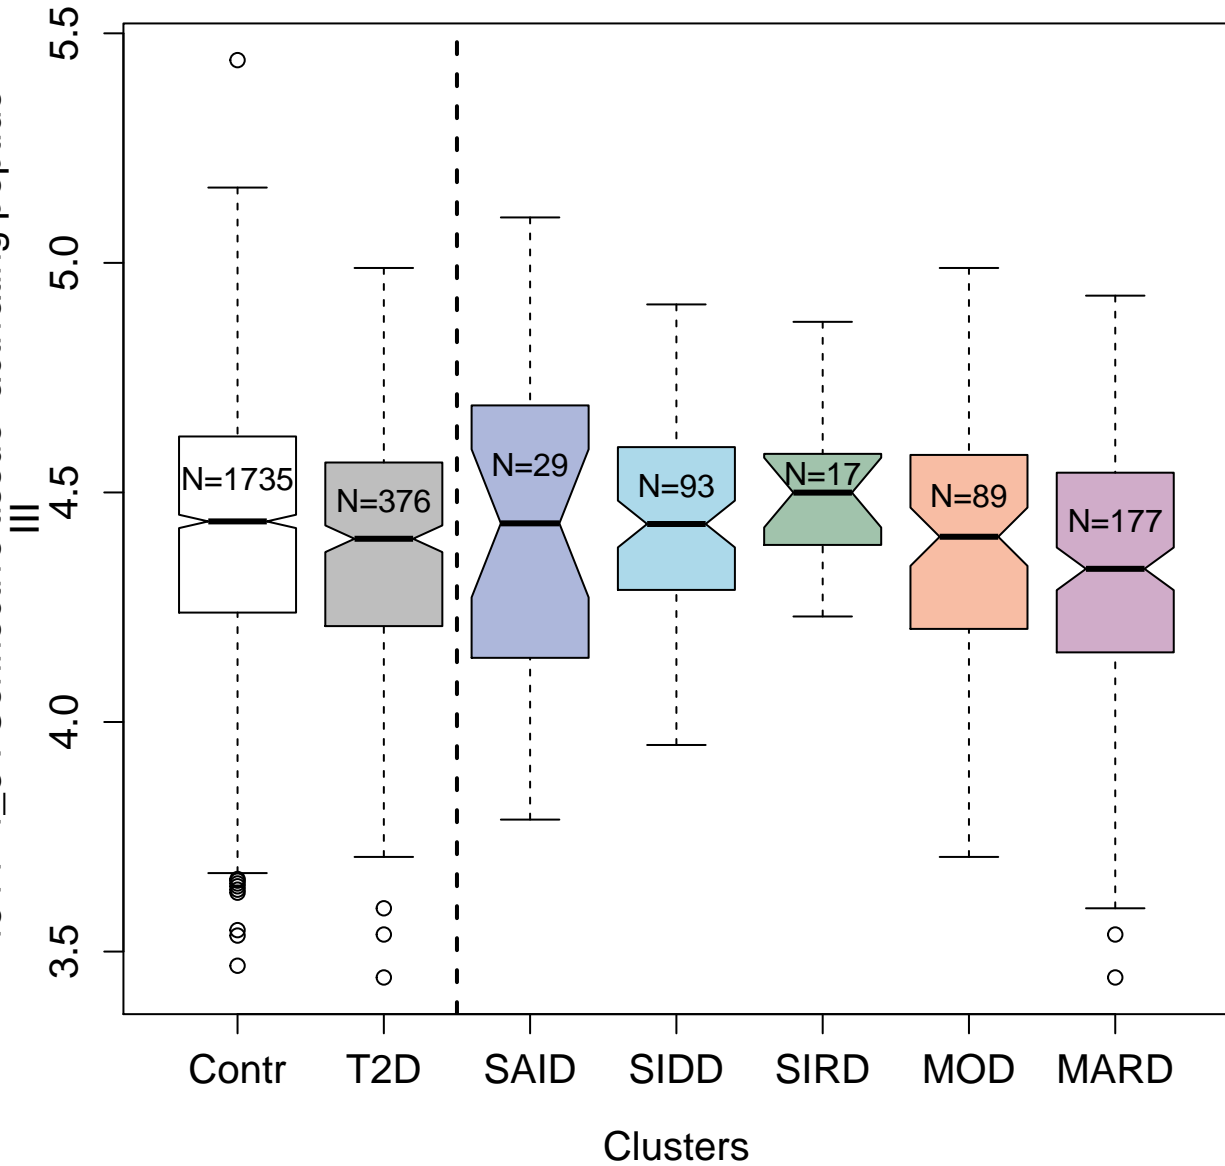

5483-1\_3 : Repulsive guidance molecule A

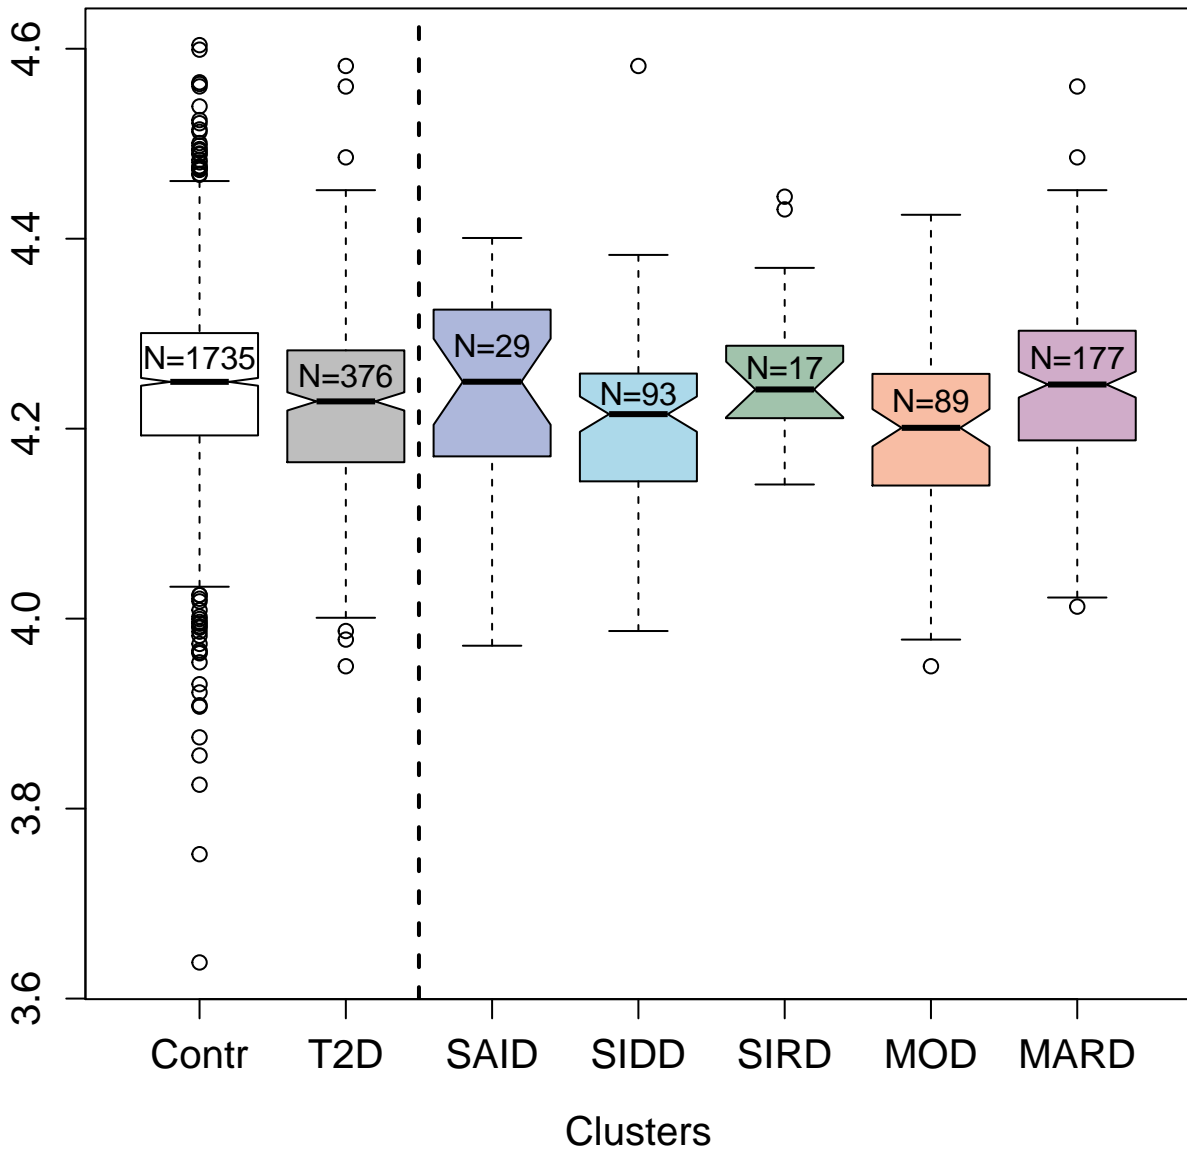

3032-11\_2 : Follicle stimulating hormone

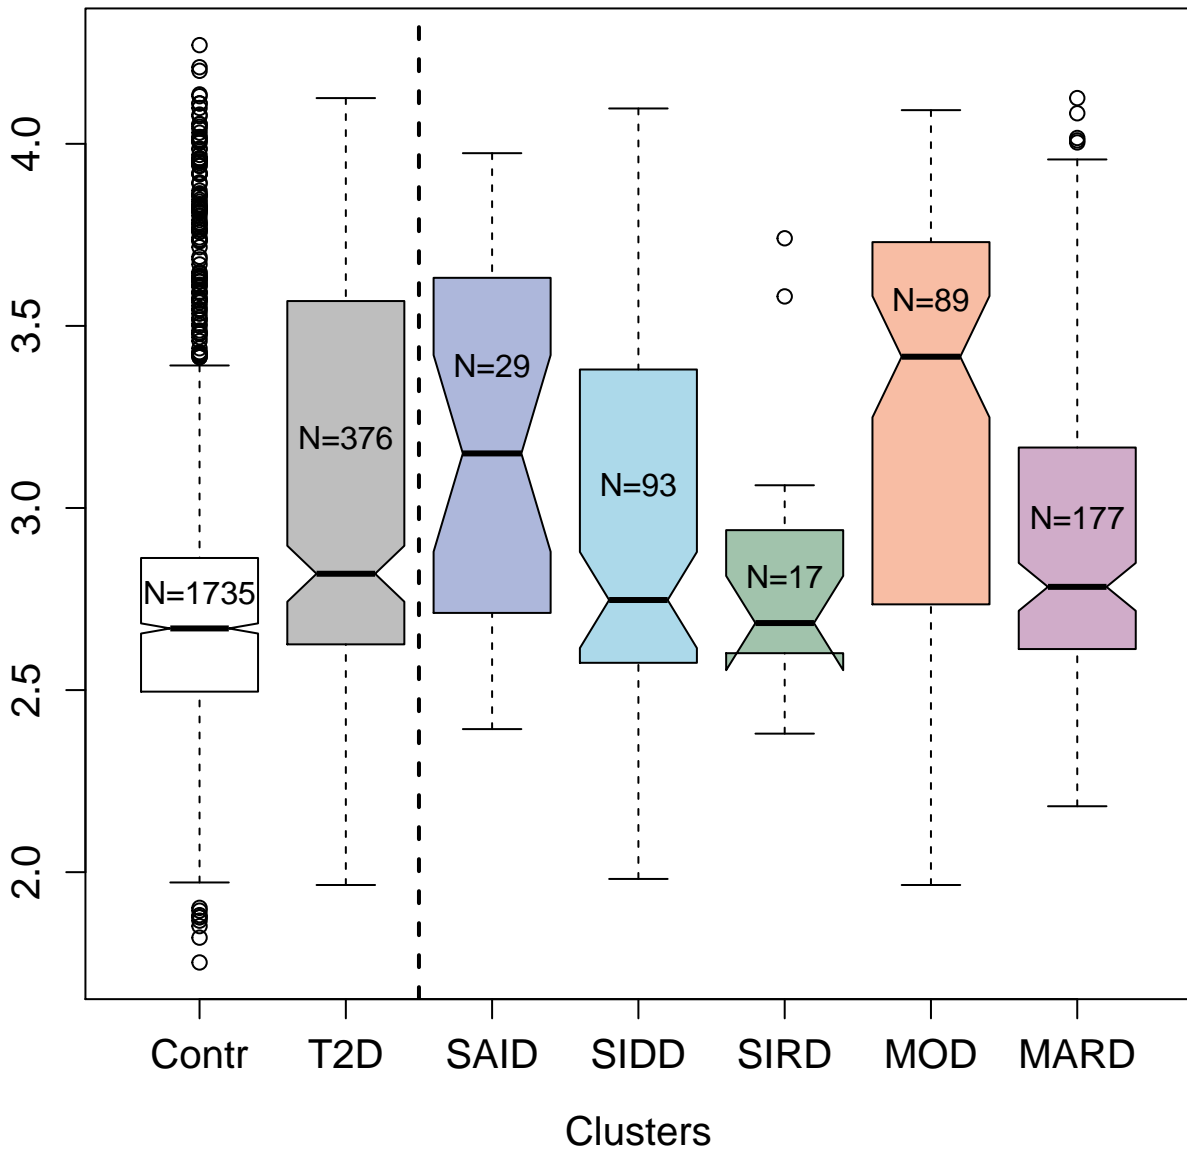

3421-54\_2 : Tumor necrosis factor ligand  
superfamily member 8

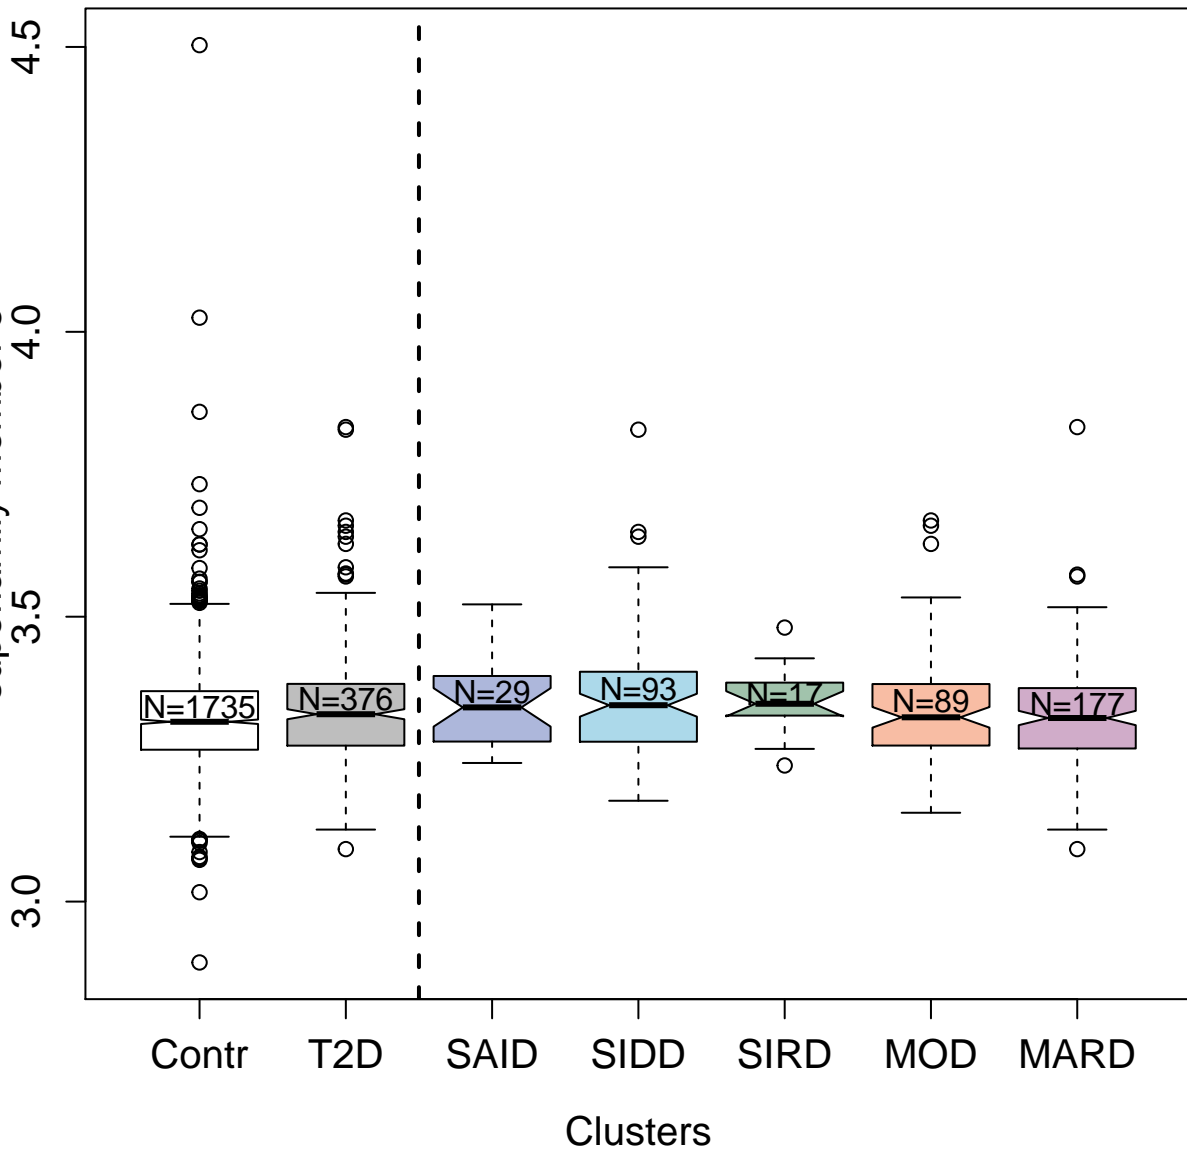



4155-3\_2 : Tenascin

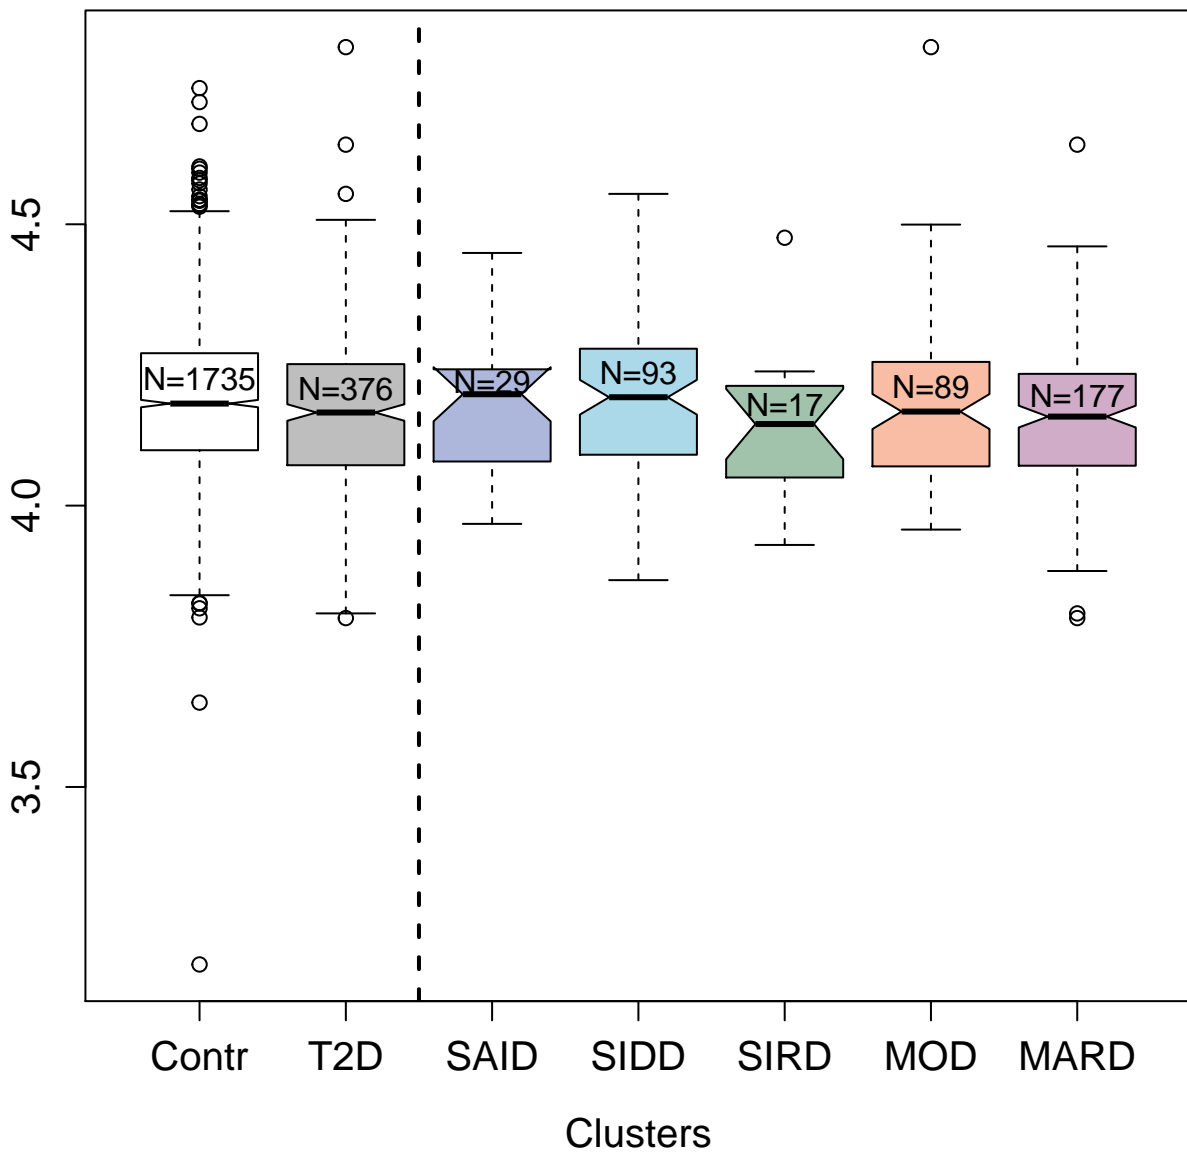

3004-67\_2 : Programmed cell death 1 ligand 2

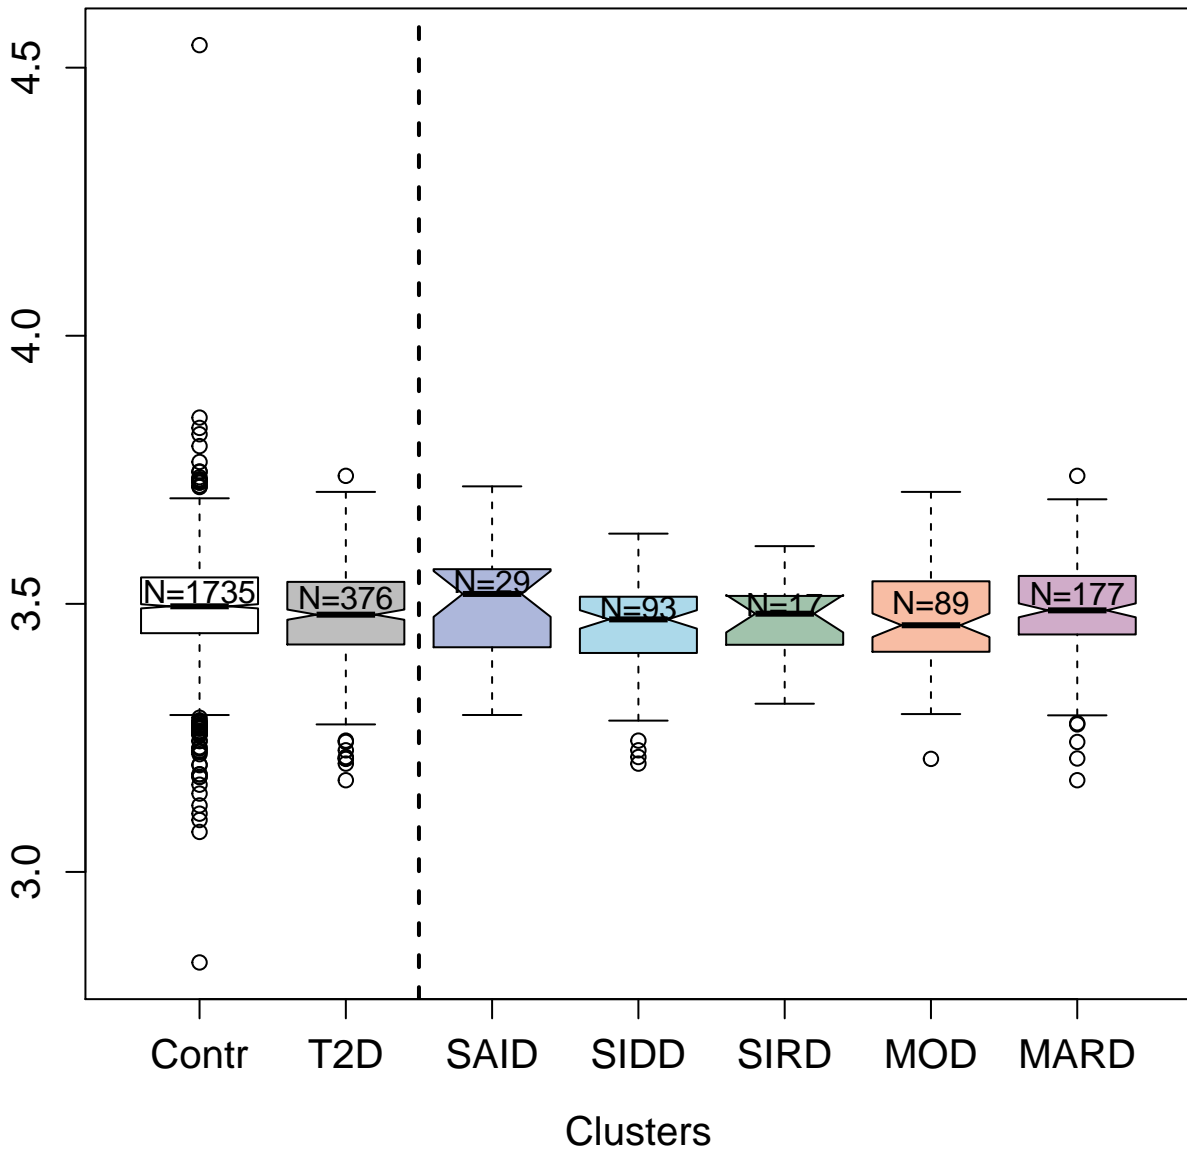

2858-29\_2 : Histone acetyltransferase type B catalytic subunit

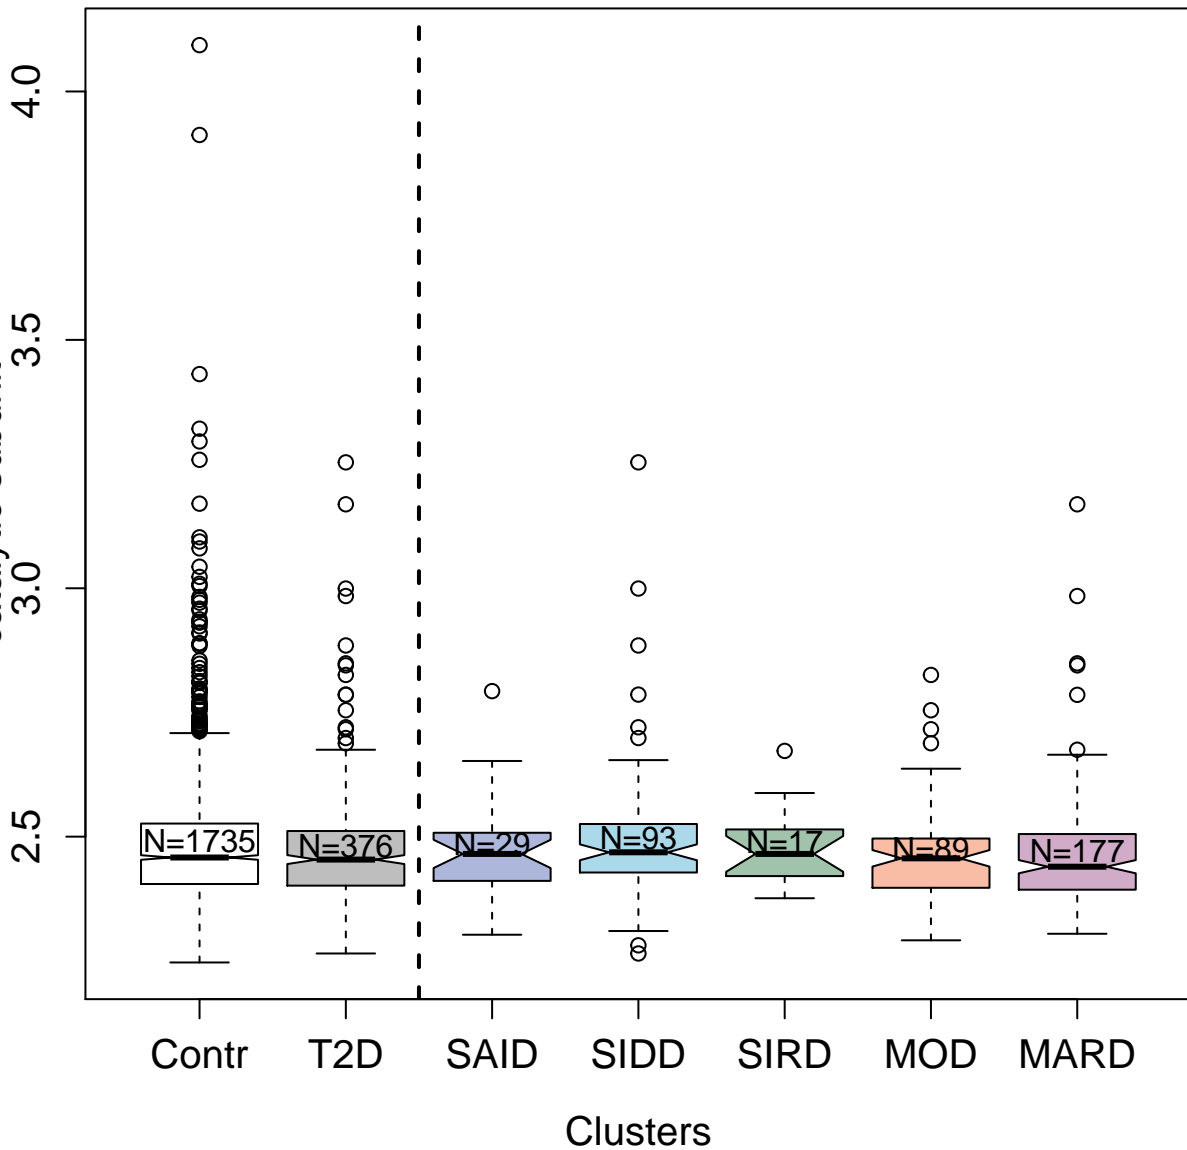

3903-49\_2 : Sorting nexin-4

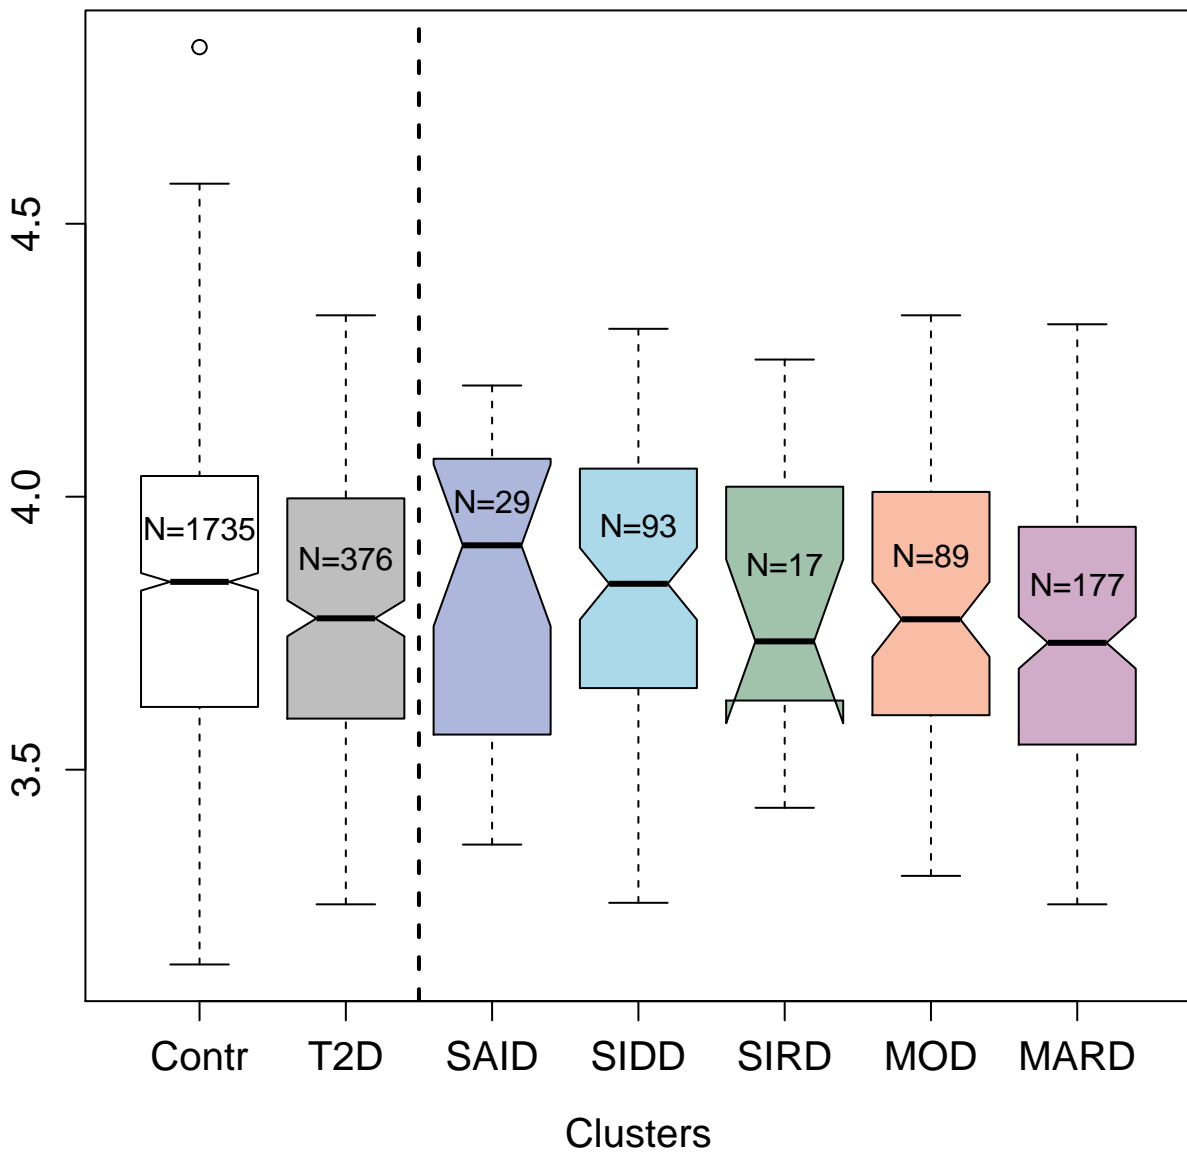

4533-76\_2 : A disintegrin and metalloproteinase  
with thrombospondin motifs 15

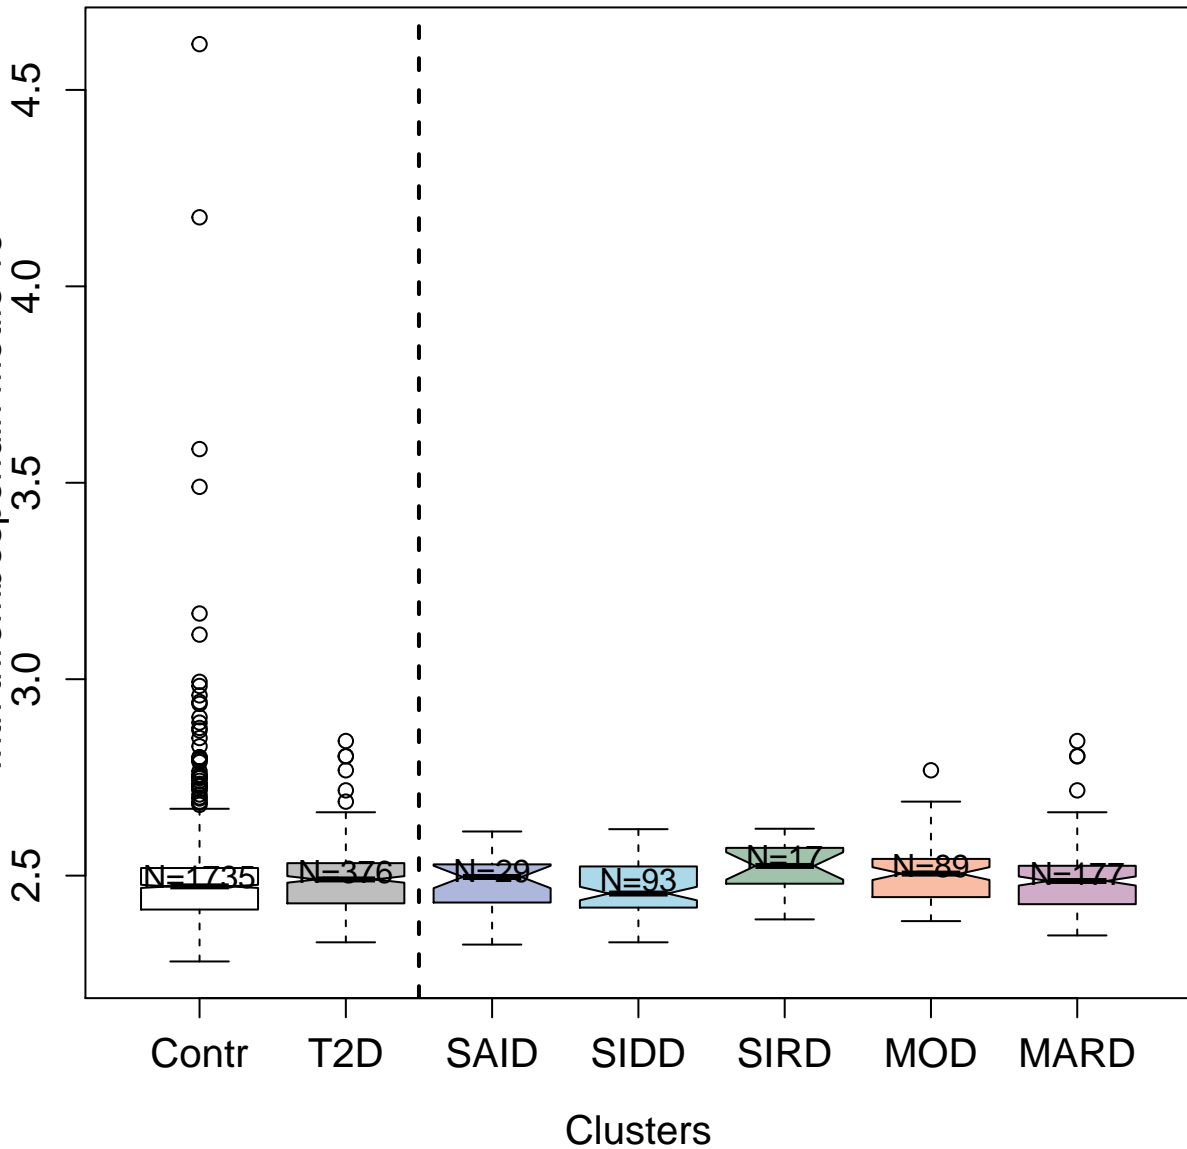

3480-7\_1 : Dual specificity protein phosphatase 3

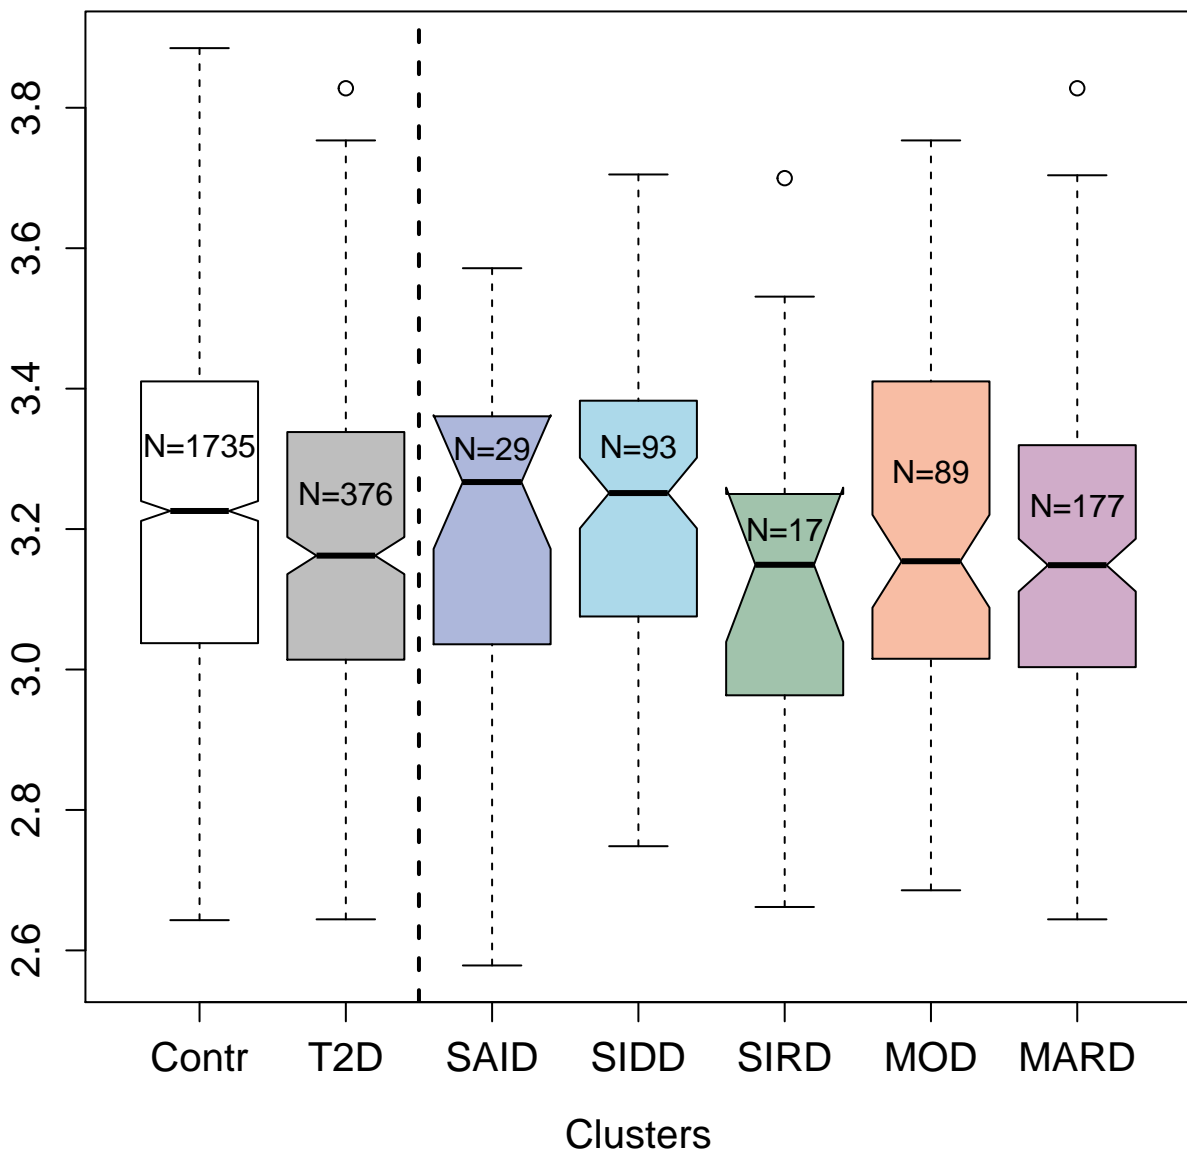

4149-8\_2 : Platelet-derived growth factor subunit

B

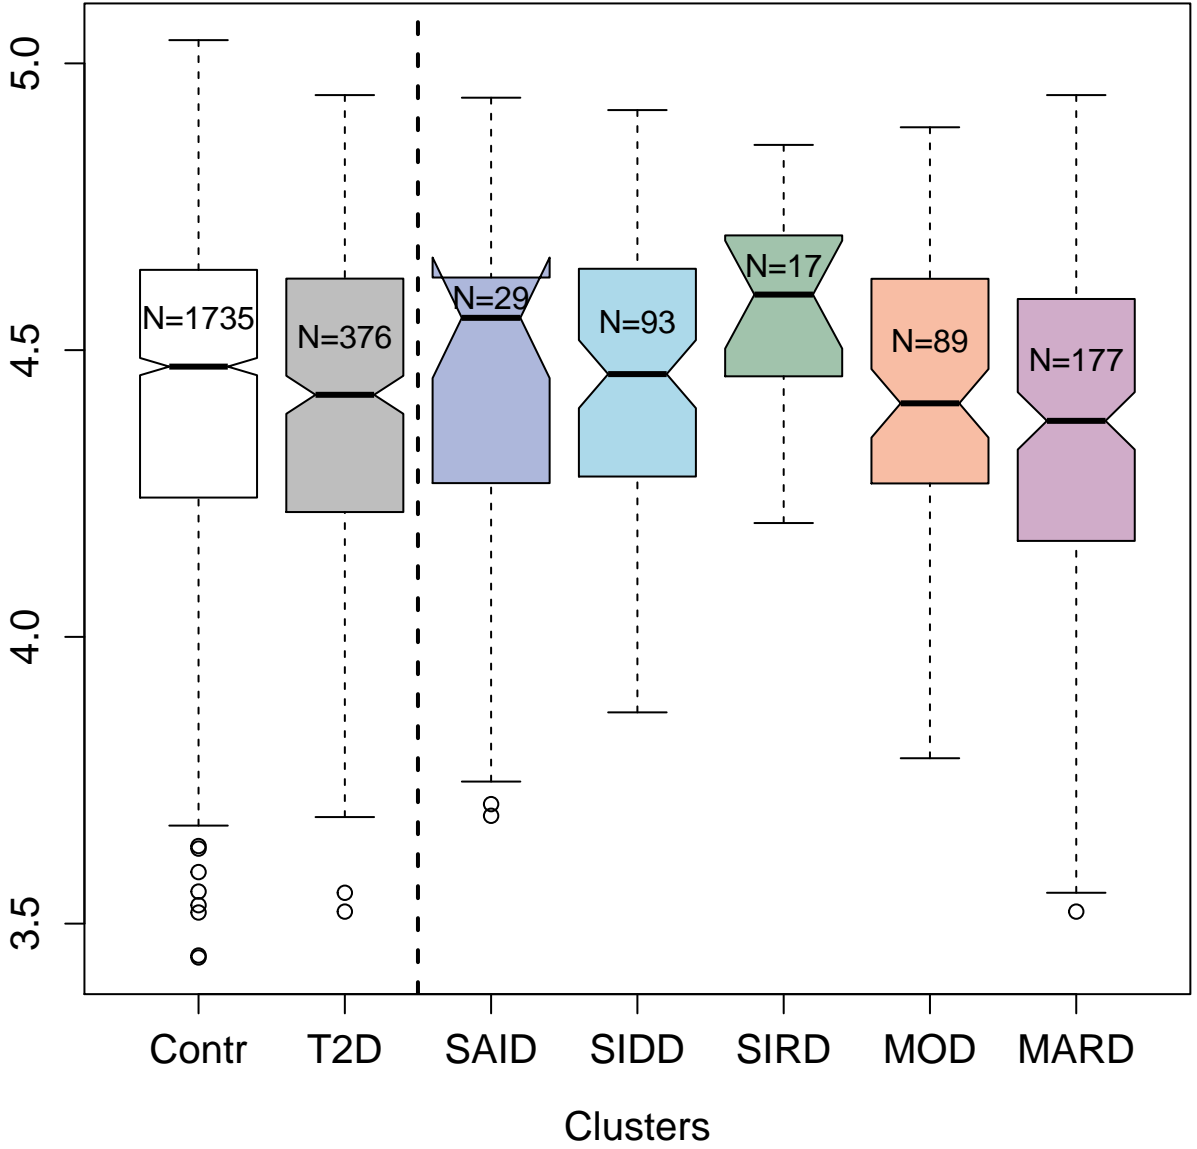

2891-1\_3 : B-cell receptor CD22

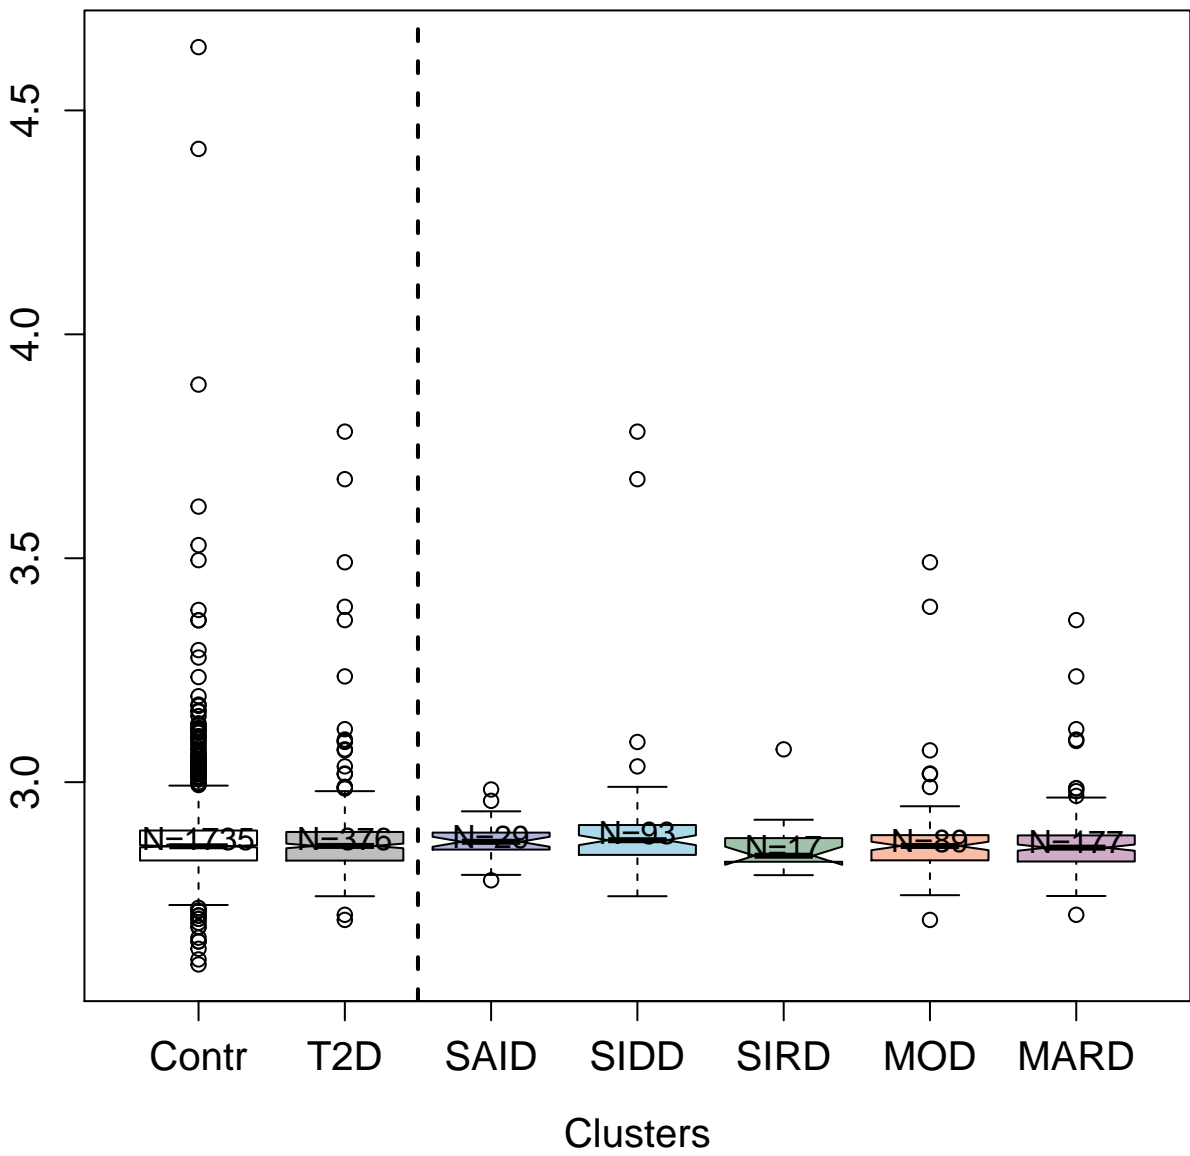



3844-2\_1 : Peptidyl-prolyl cis-trans isomerase A

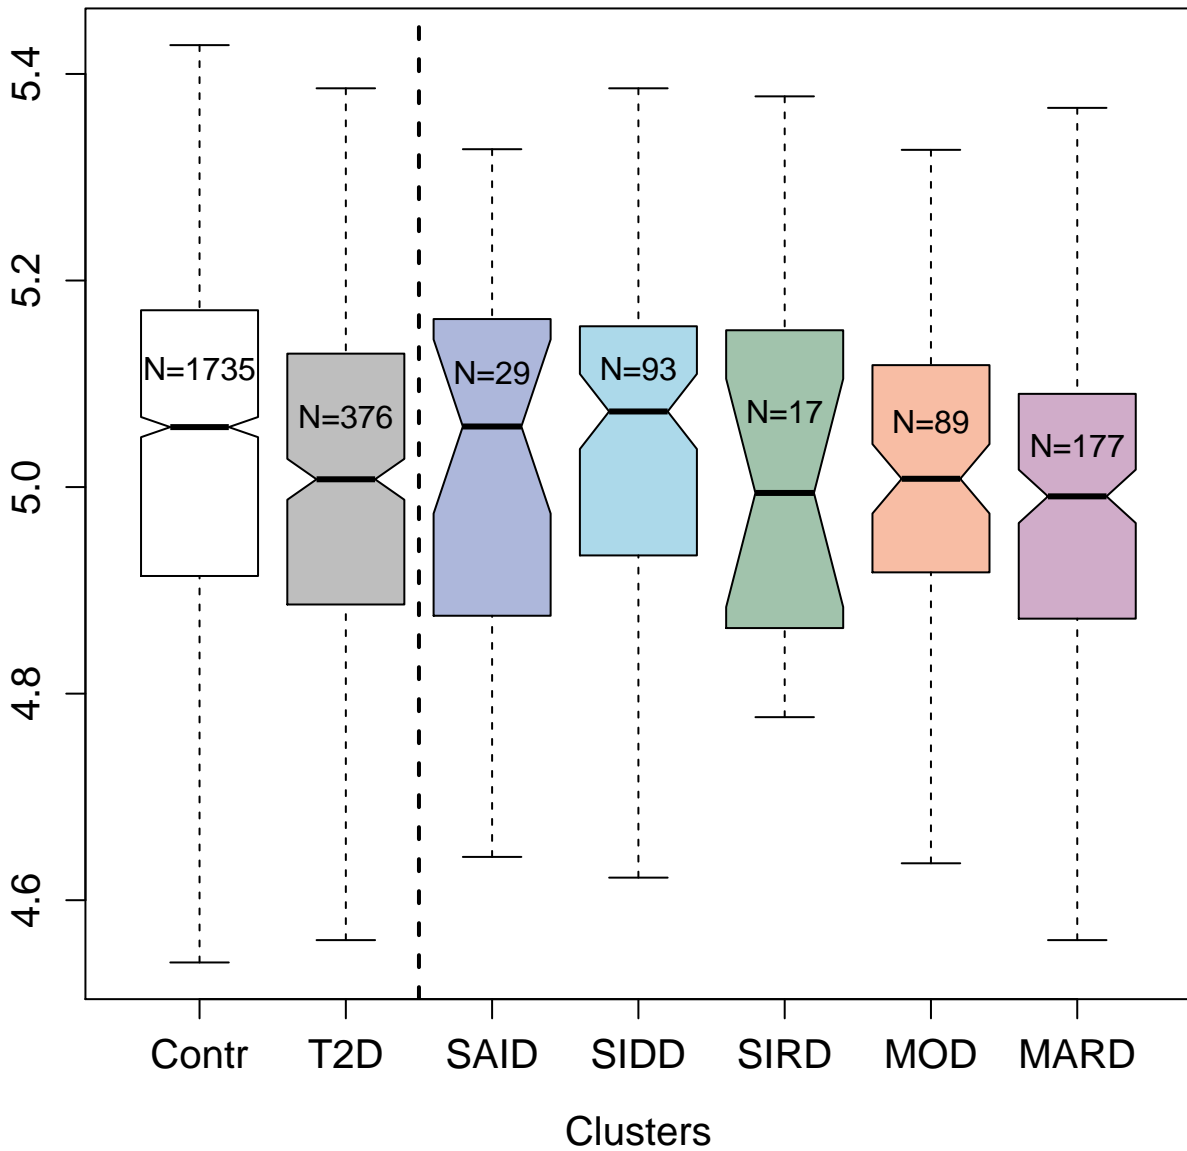

4132-27\_2 : Follistatin

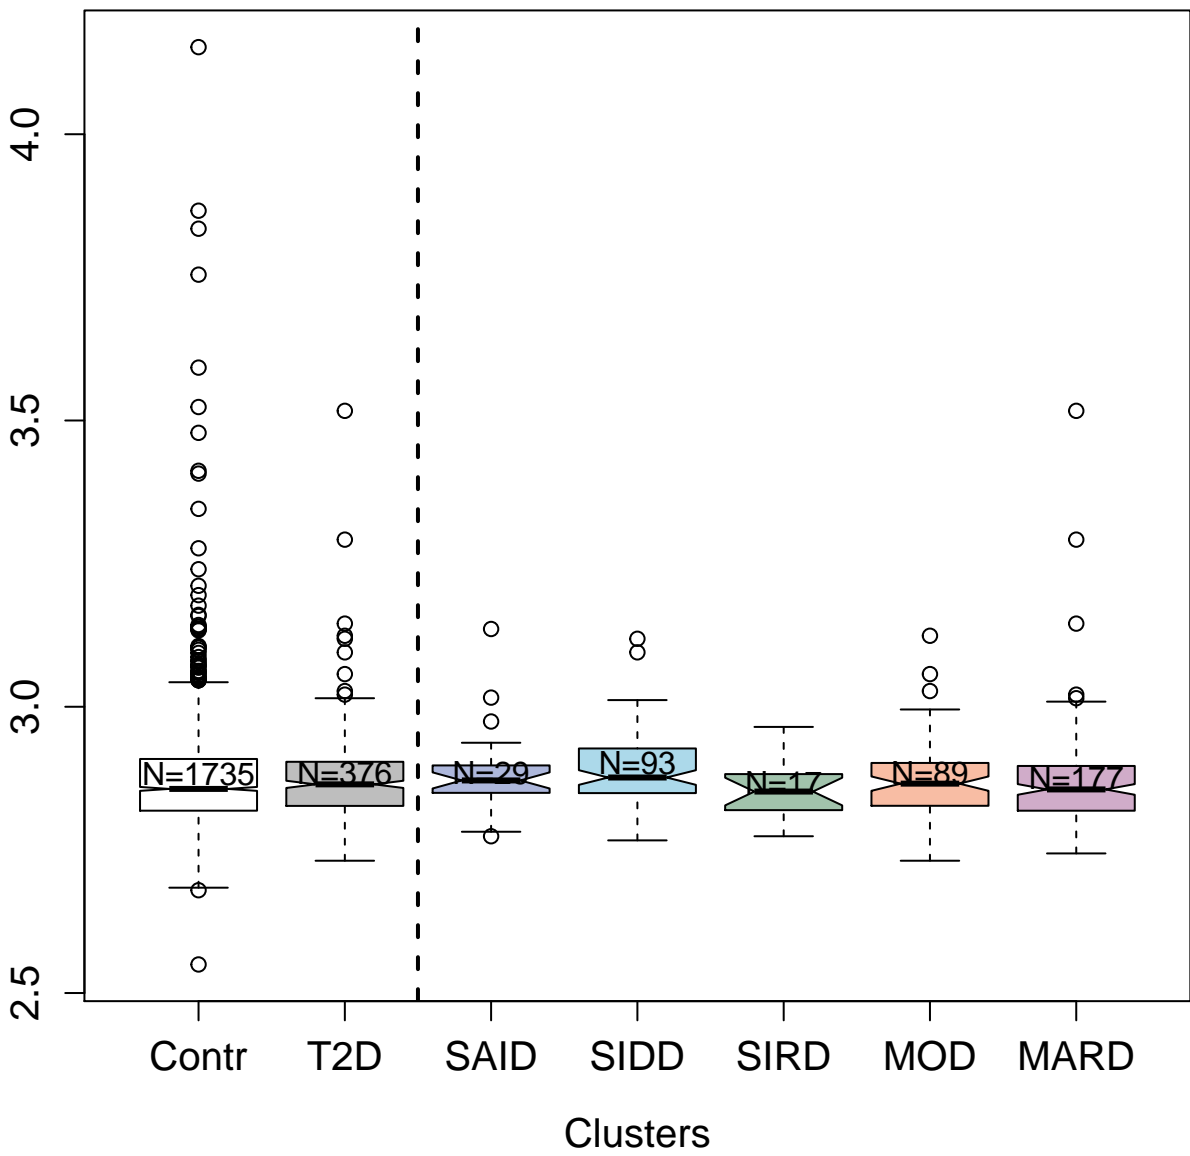

2906-55\_3 : Interleukin-4

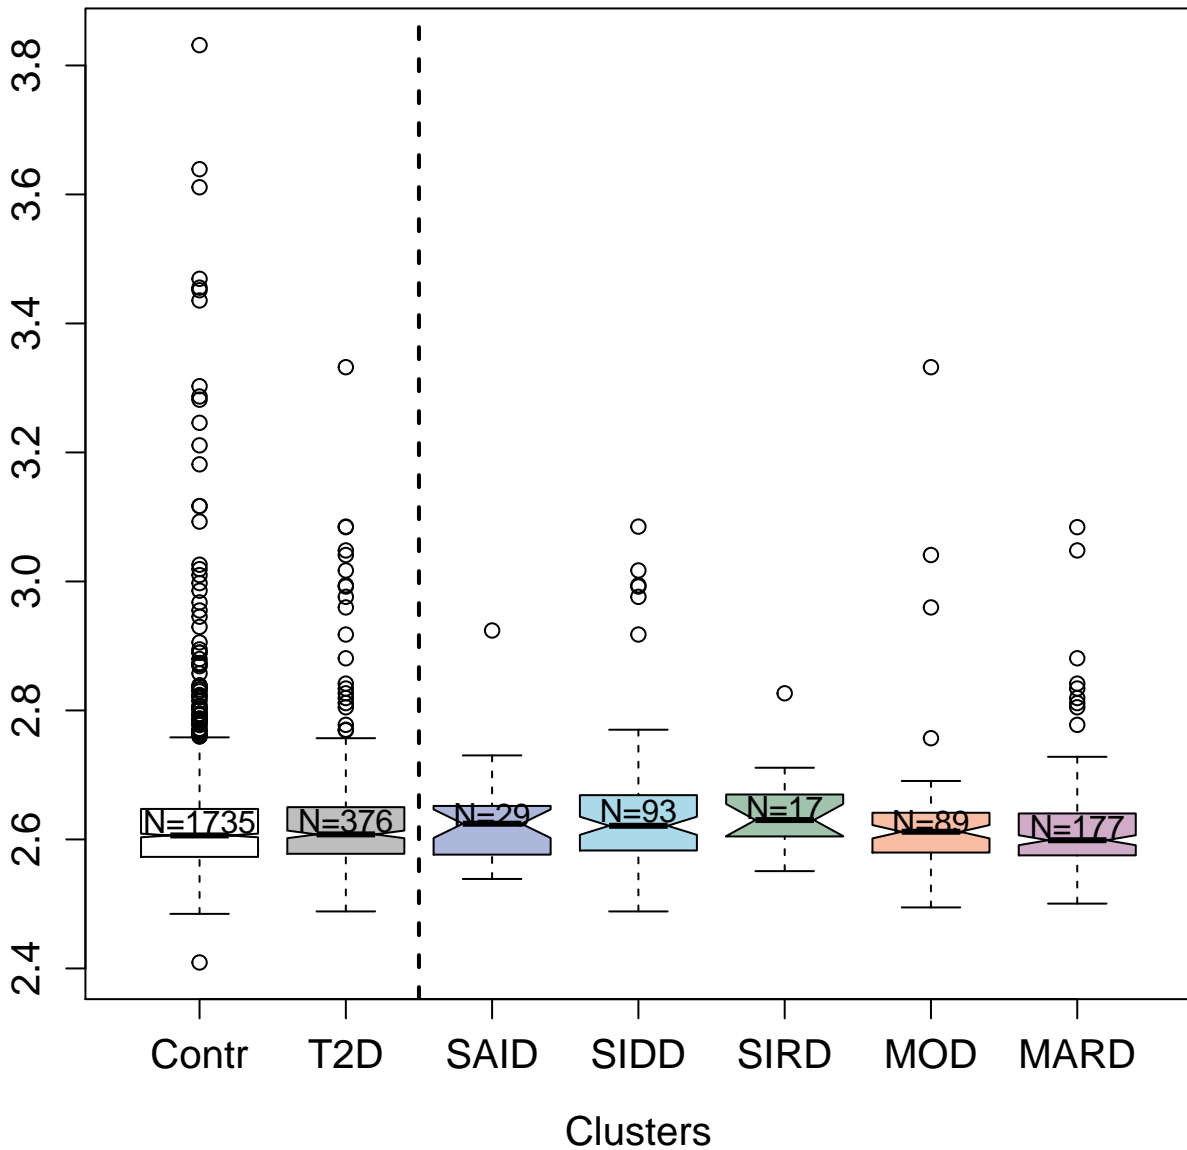

3874-8\_1 : Ubiquitin-conjugating enzyme E2 L3

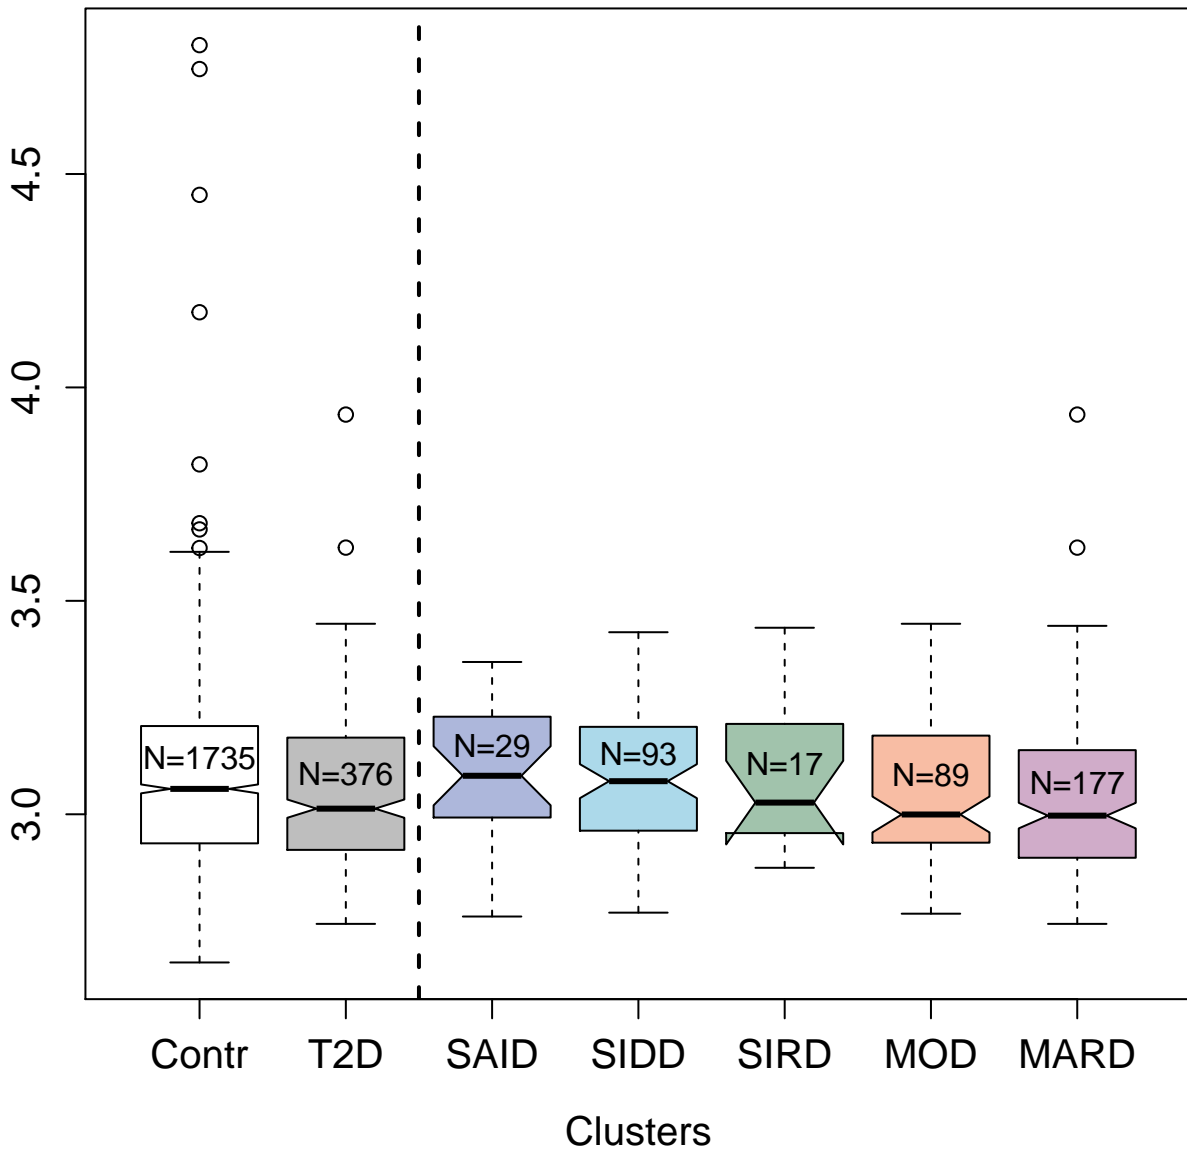

2615-60\_2 : Ephrin-A5

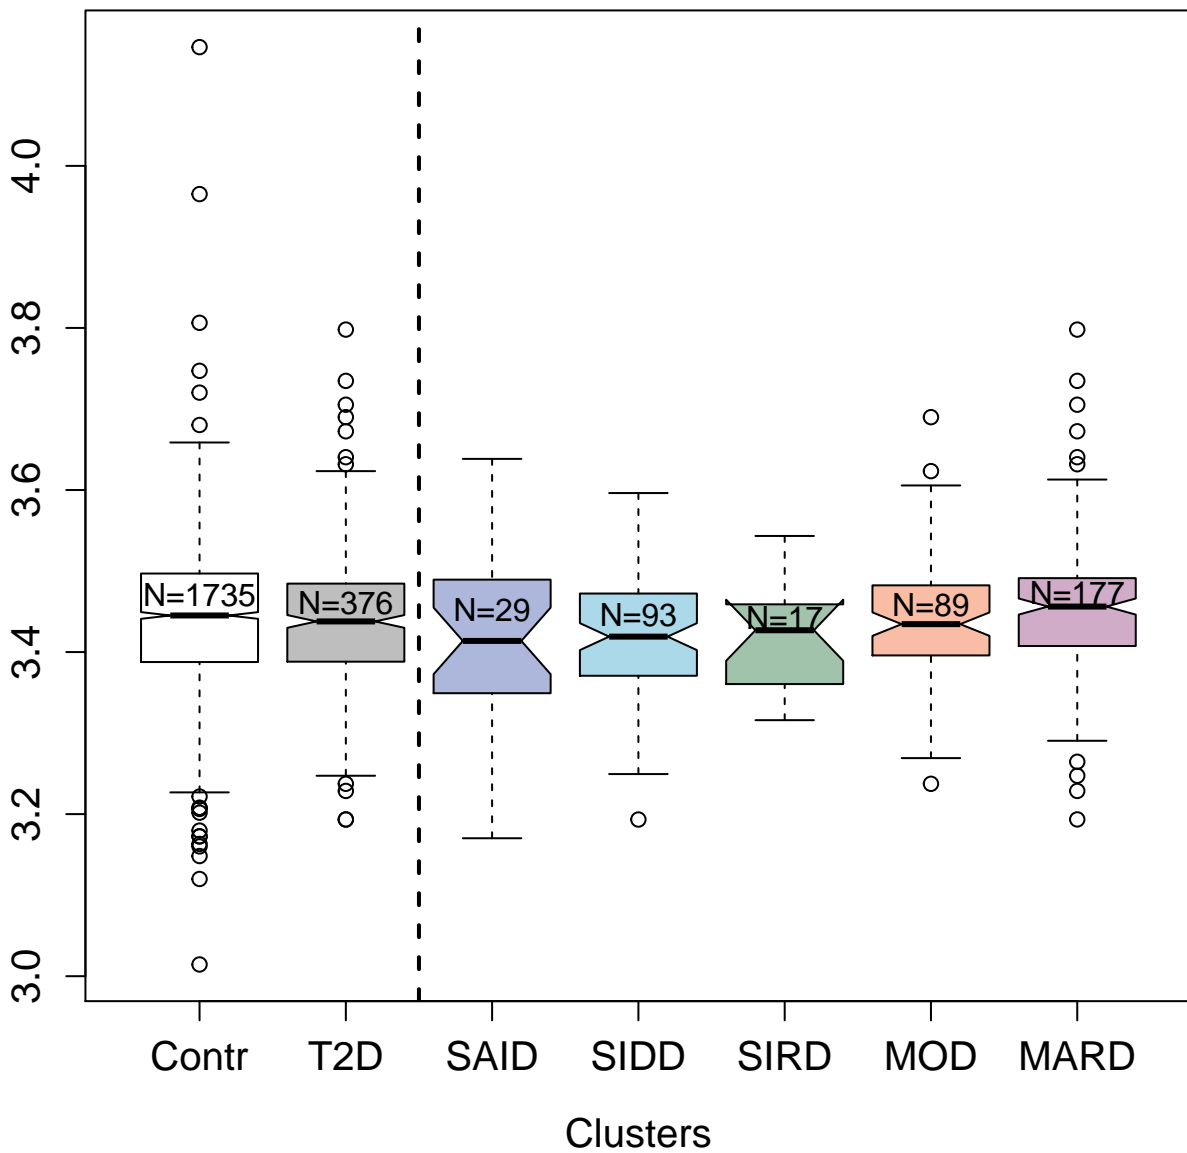

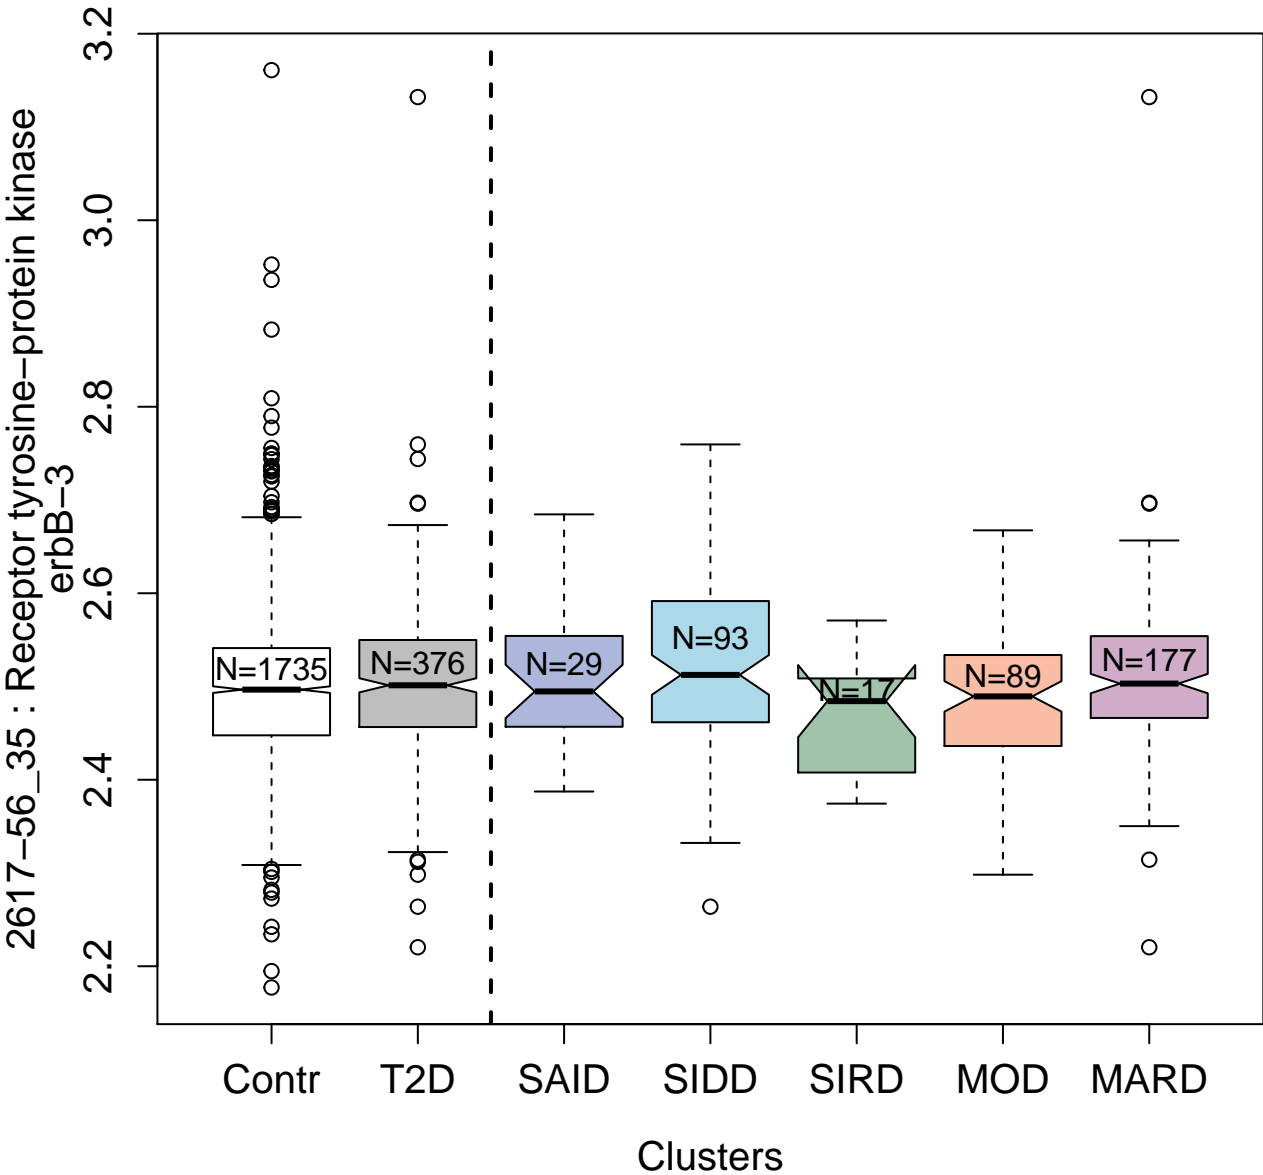

3773-15\_4 : Angiopoietin-1 receptor; soluble

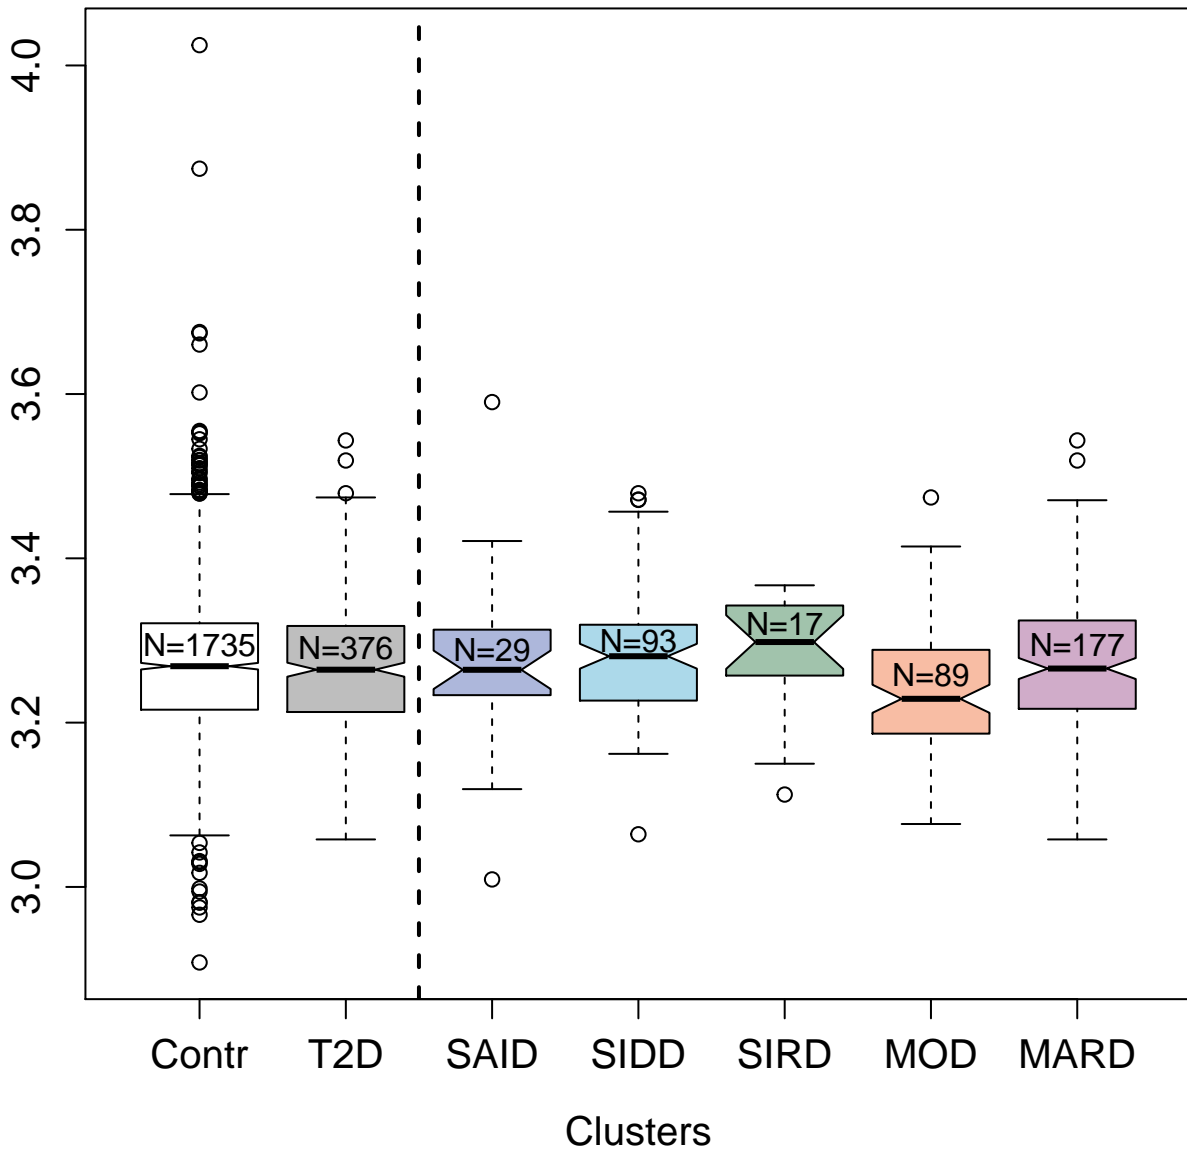

14156-33\_3 : 14-3-3 protein beta/alpha

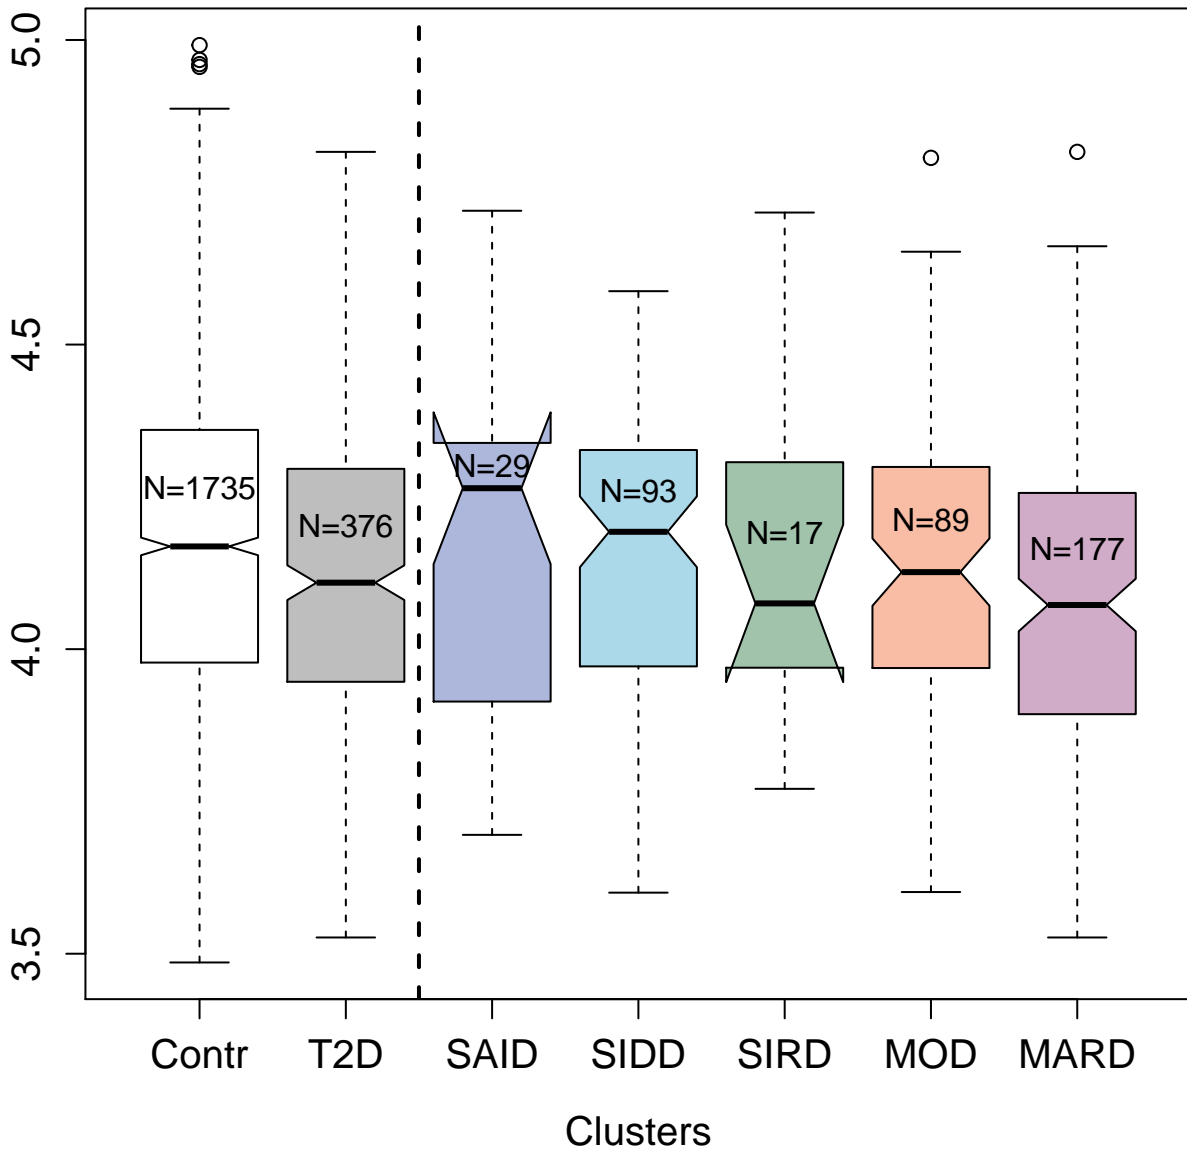



3472-40\_2 : Baculoviral IAP repeat-containing protein 5

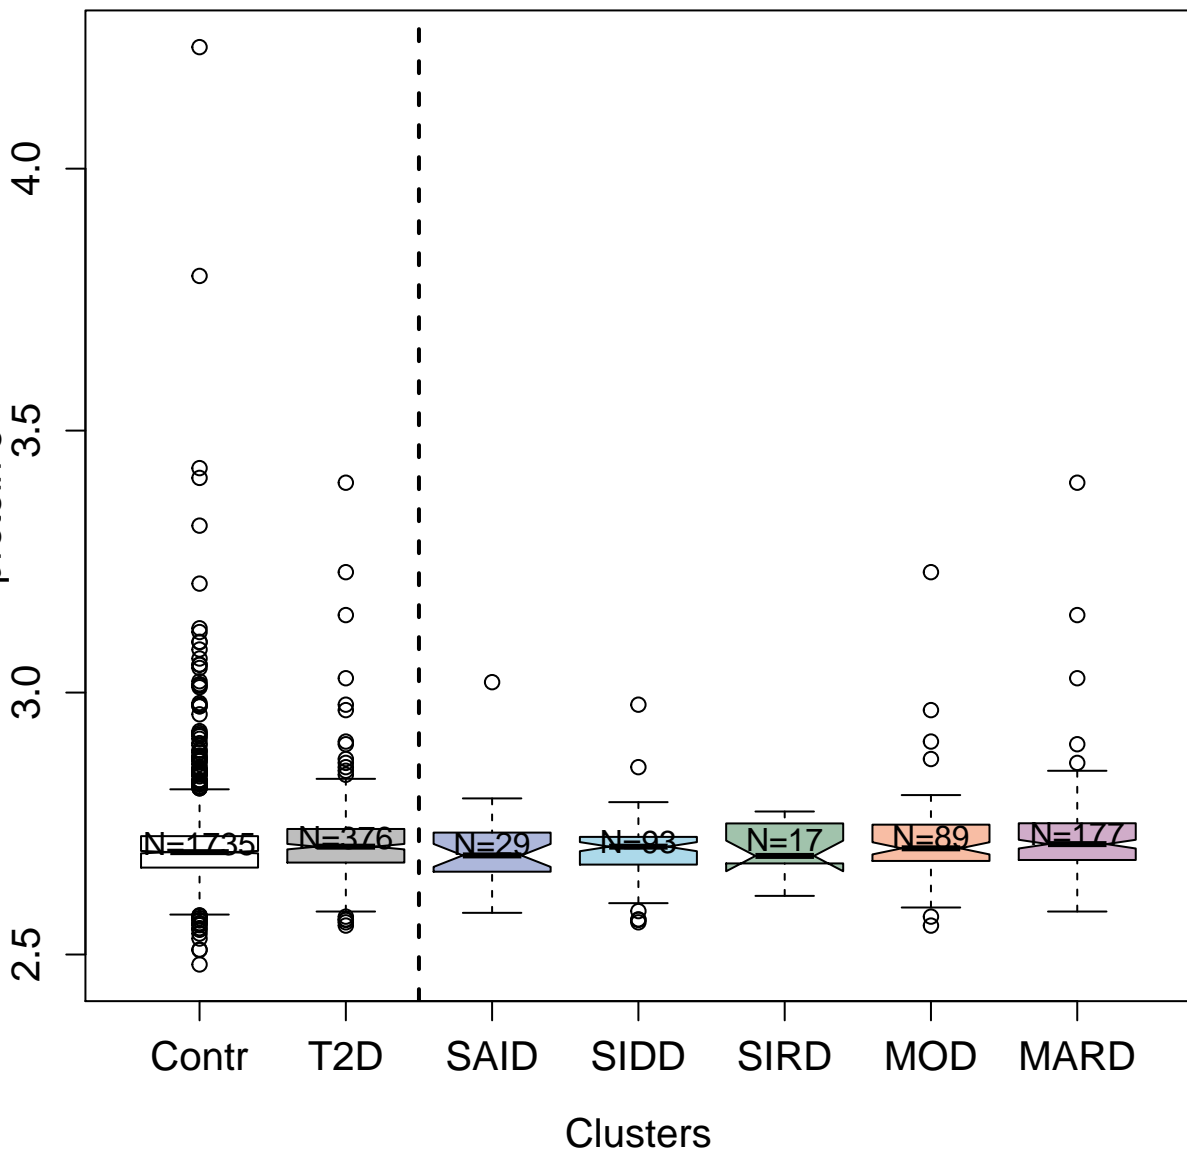

2580-83\_2 : Myeloperoxidase

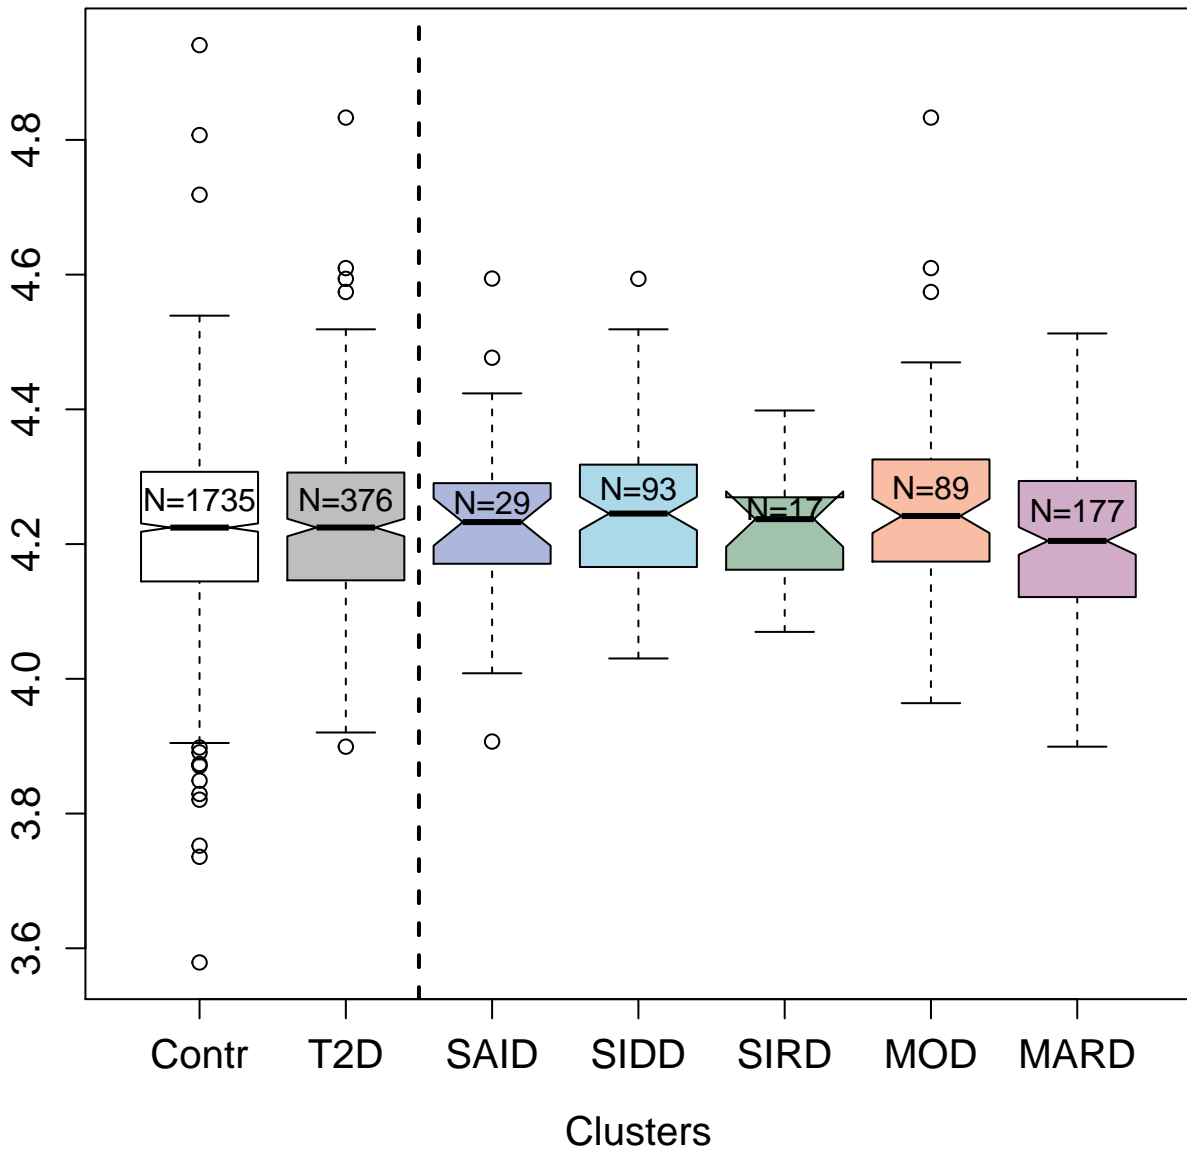

10363-13\_3 : Mothers against decapentaplegic

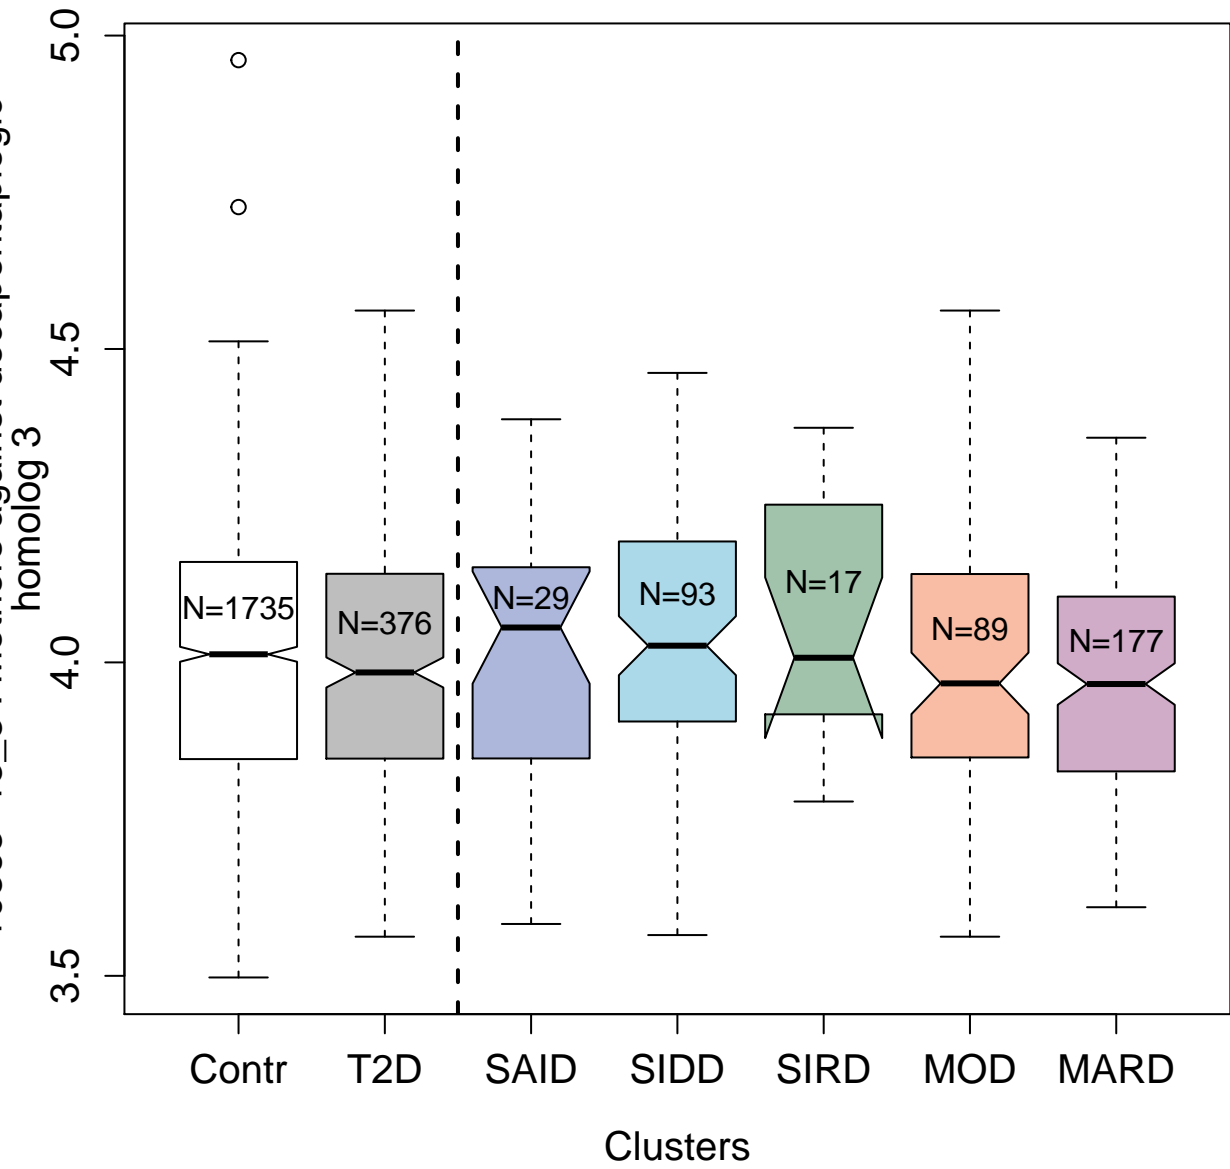

3312-64\_1 : High affinity immunoglobulin gamma Fc

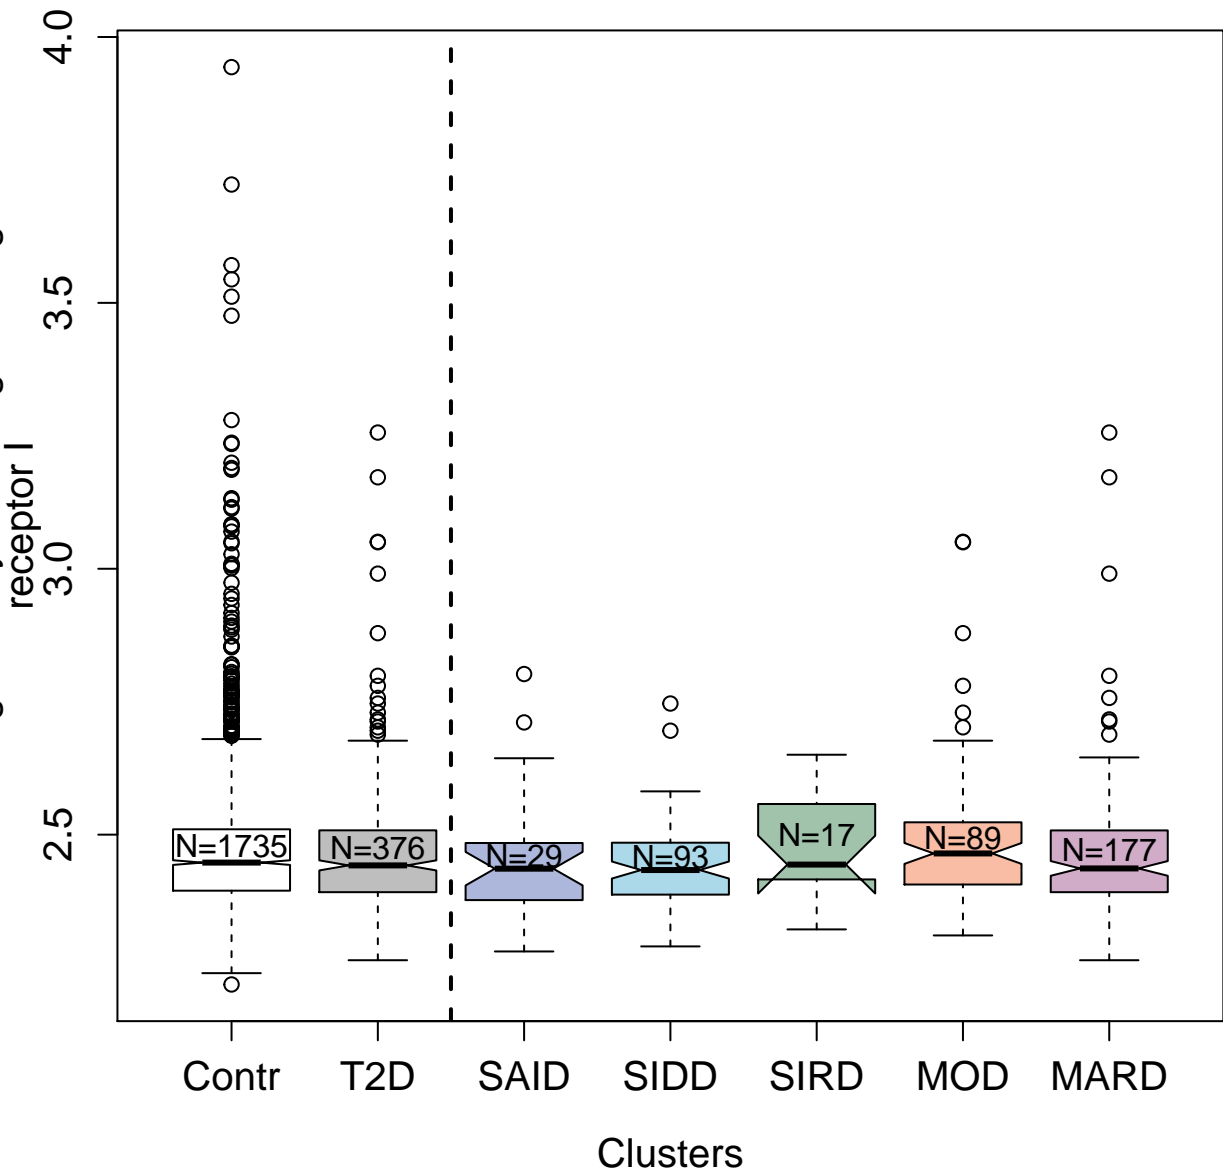

7640-29\_3 : Low-density lipoprotein  
receptor-related protein 1B

4.2  
4.4  
4.6  
4.8

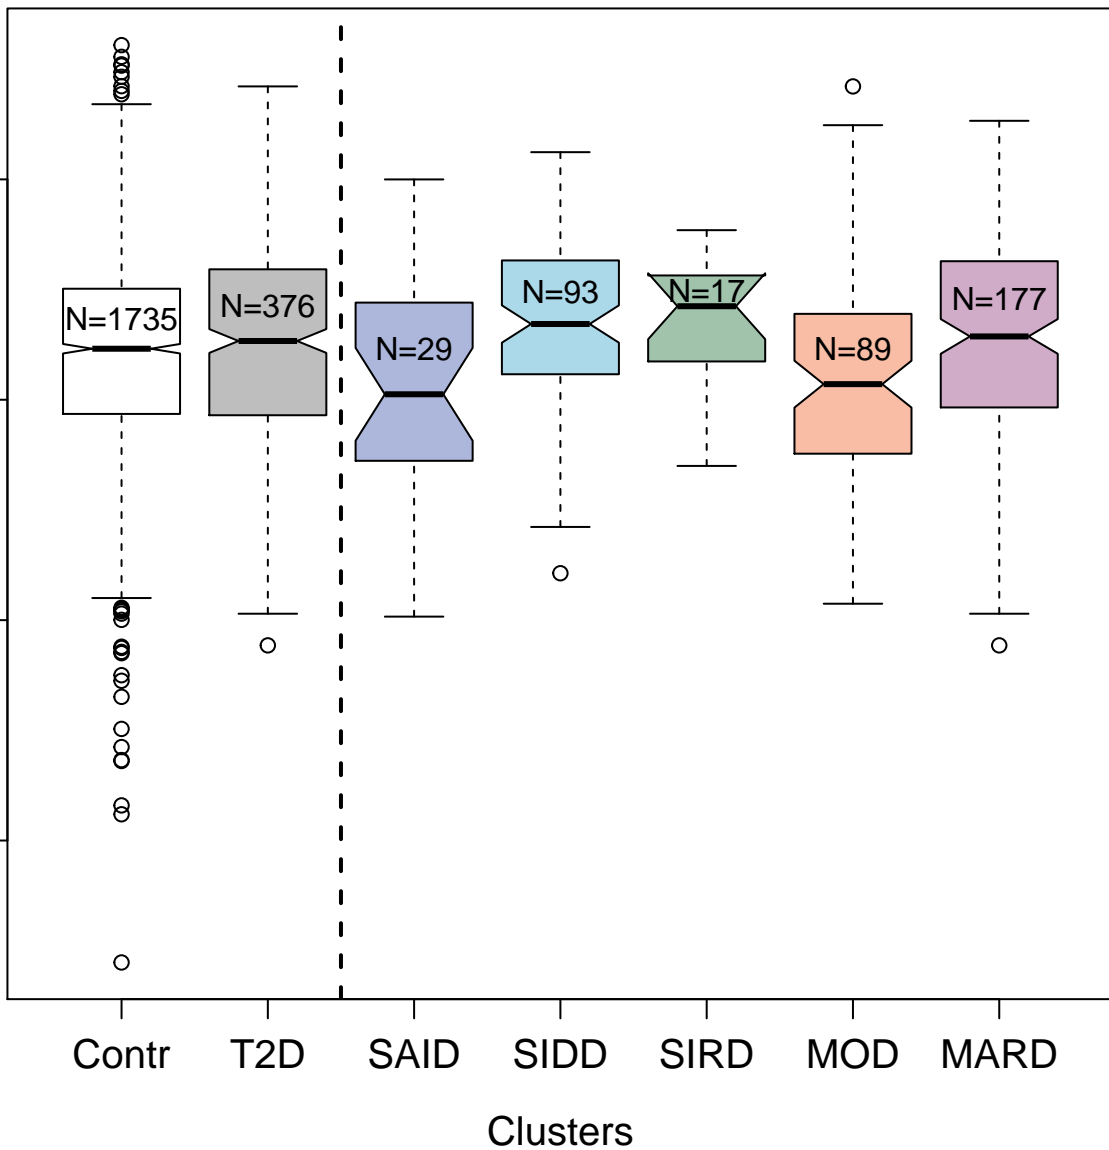

2789-26\_2 : Matrilysin

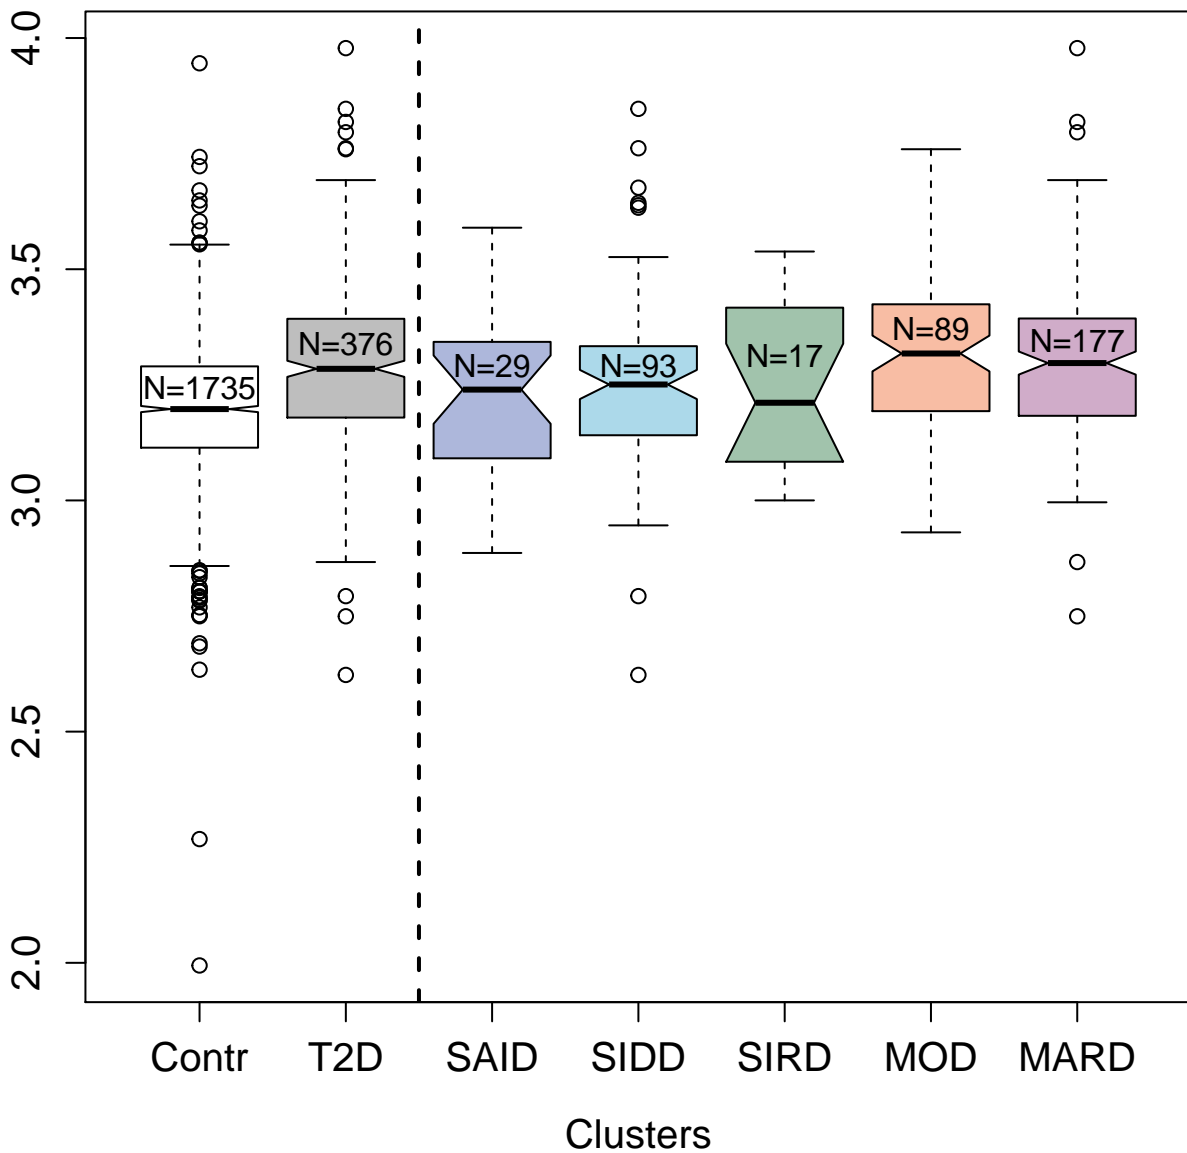

4136-40\_2 : Interleukin-17D

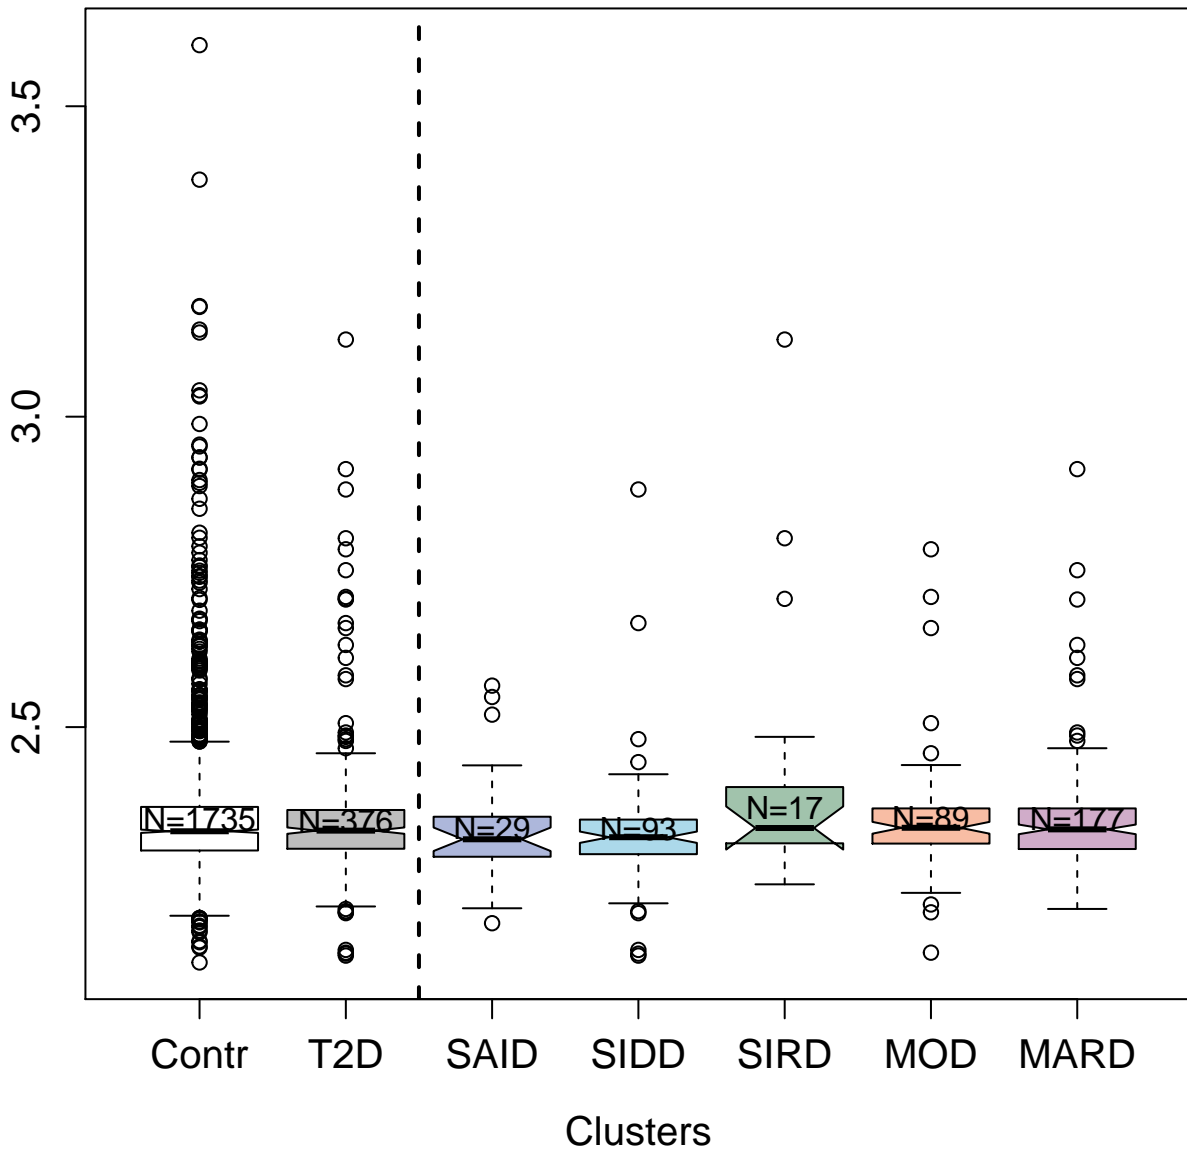

9197-4\_3 : Galectin-9

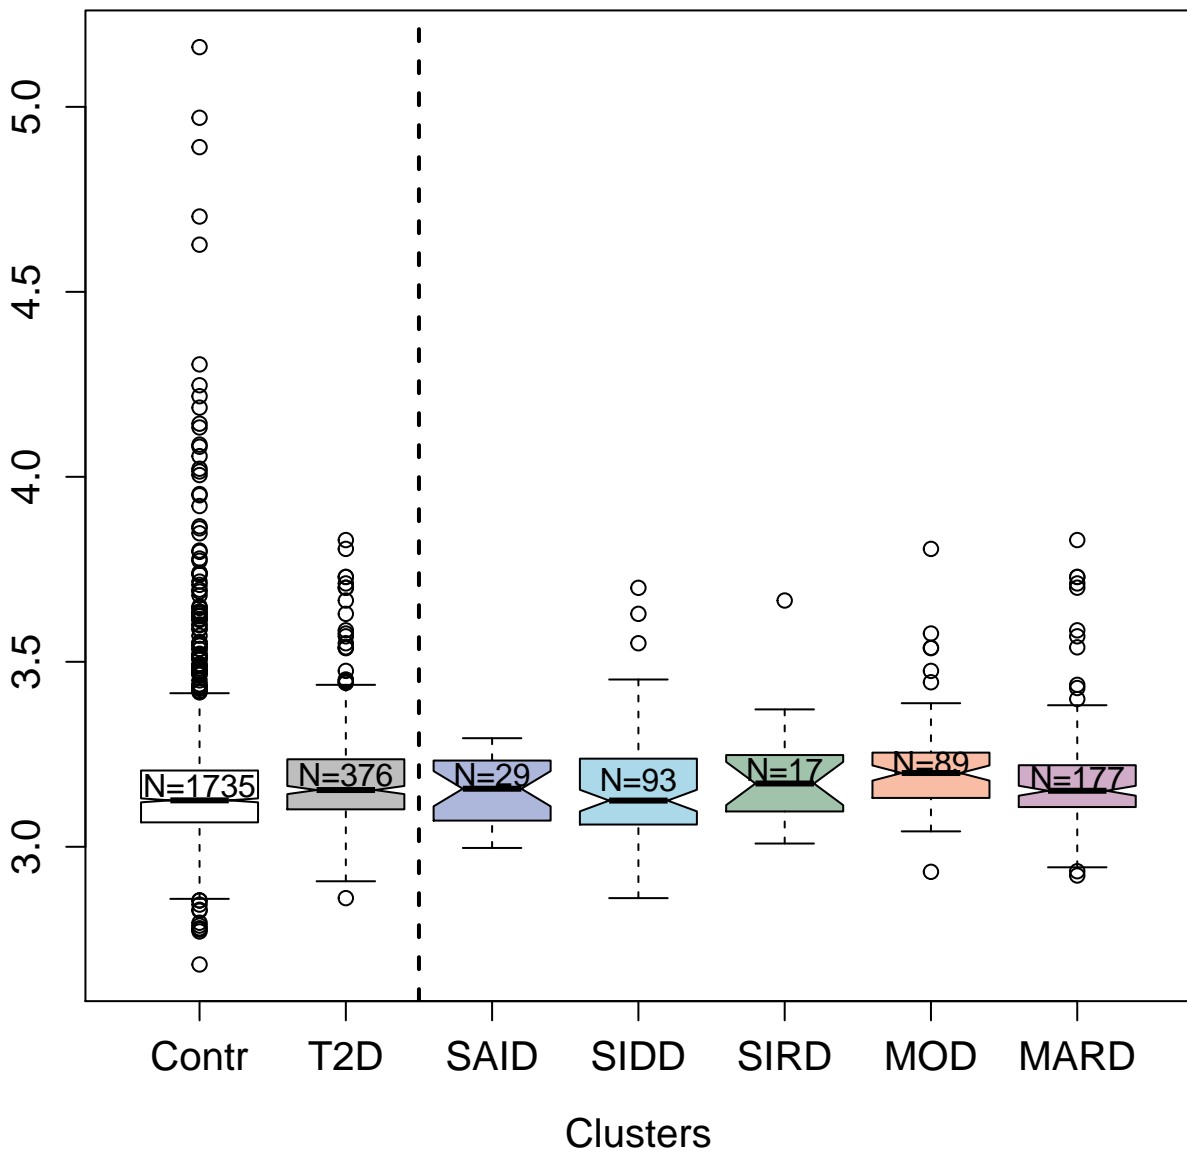



4188-1\_2 : Aflatoxin B1 aldehyde reductase member

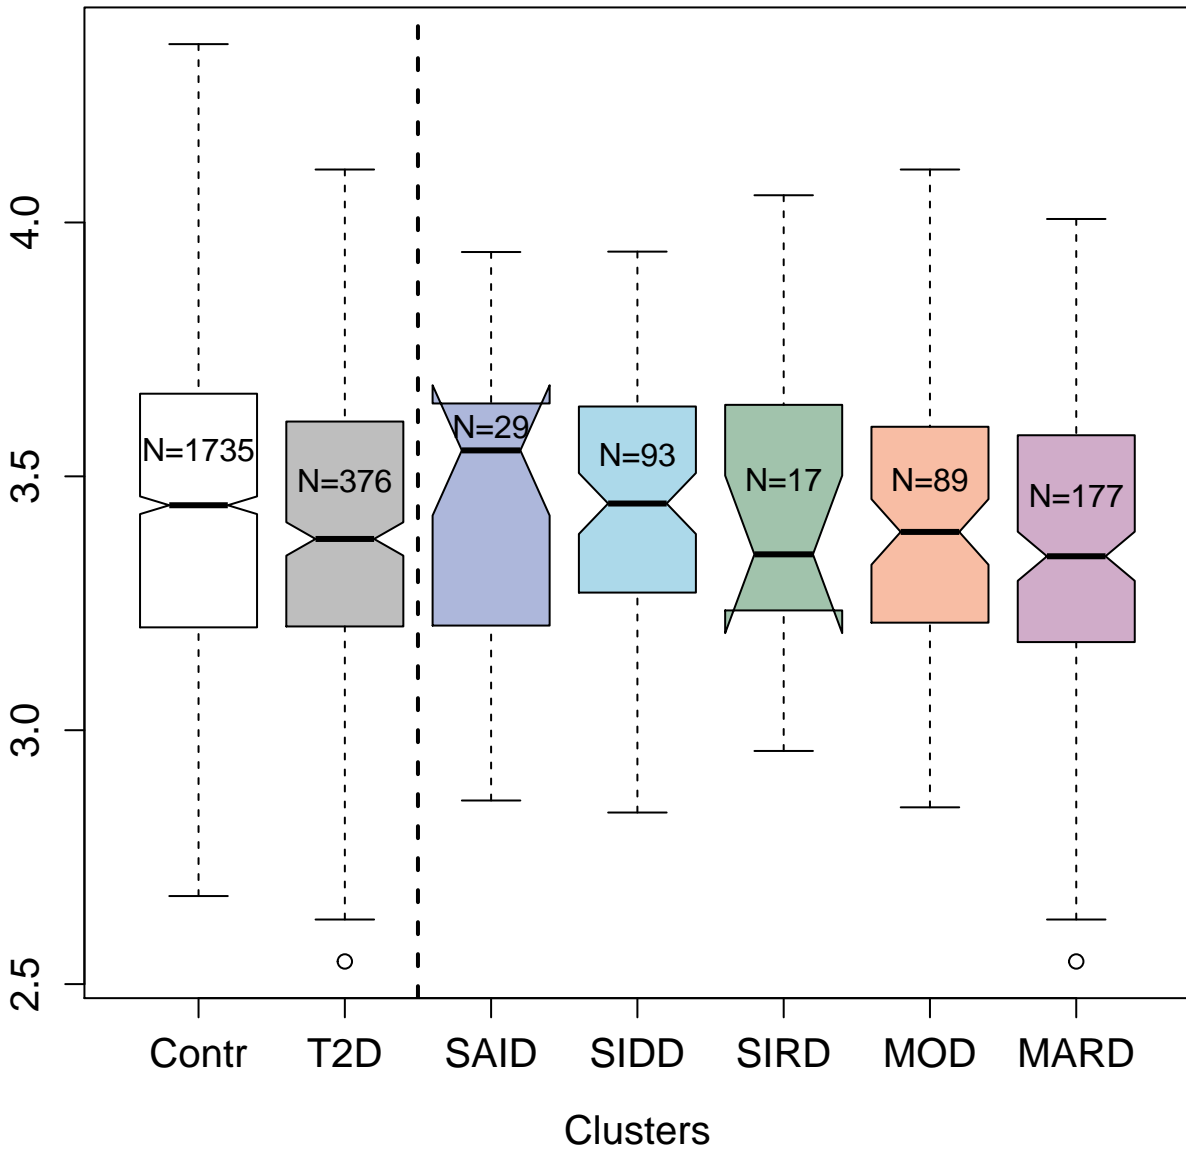

5464-52\_3 : Growth factor receptor-bound protein<sup>2</sup>

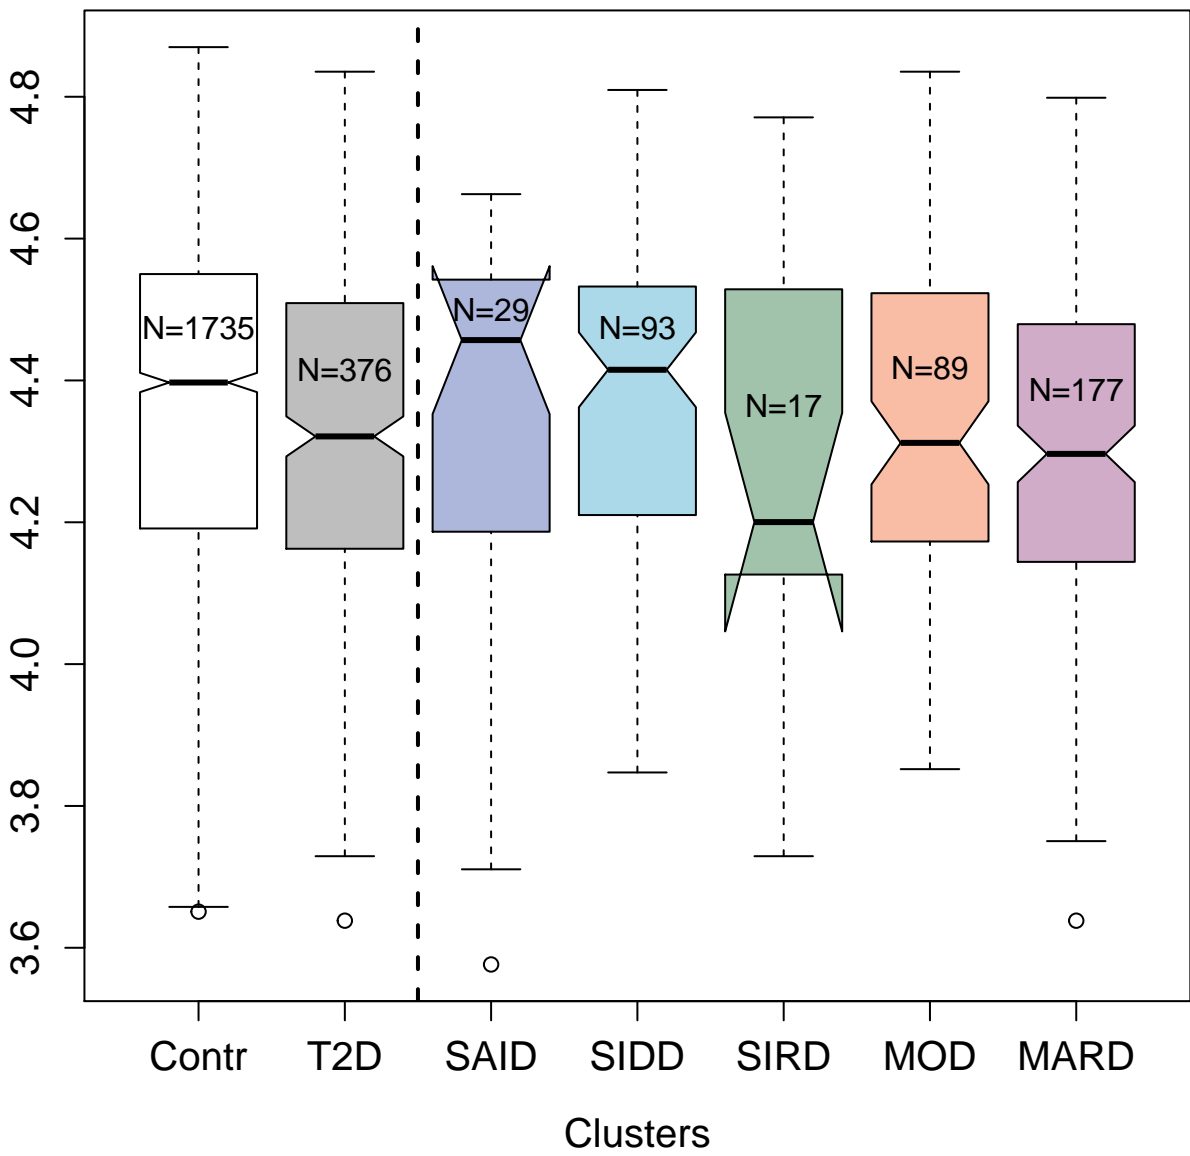

5316-54\_3 : Prothrombin

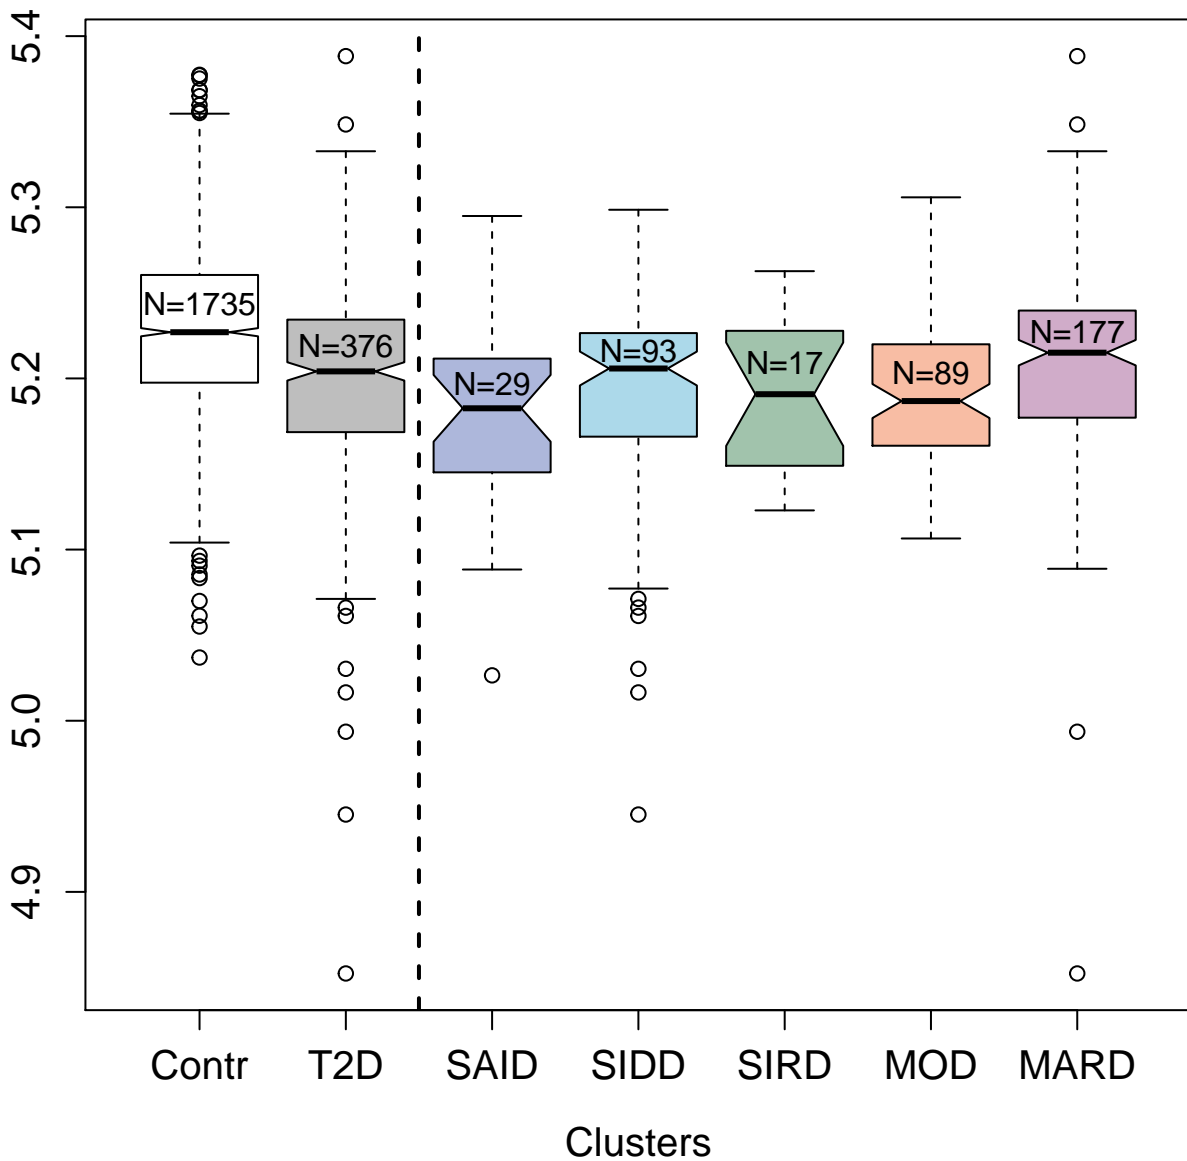

4306-4\_2 : Transketolase

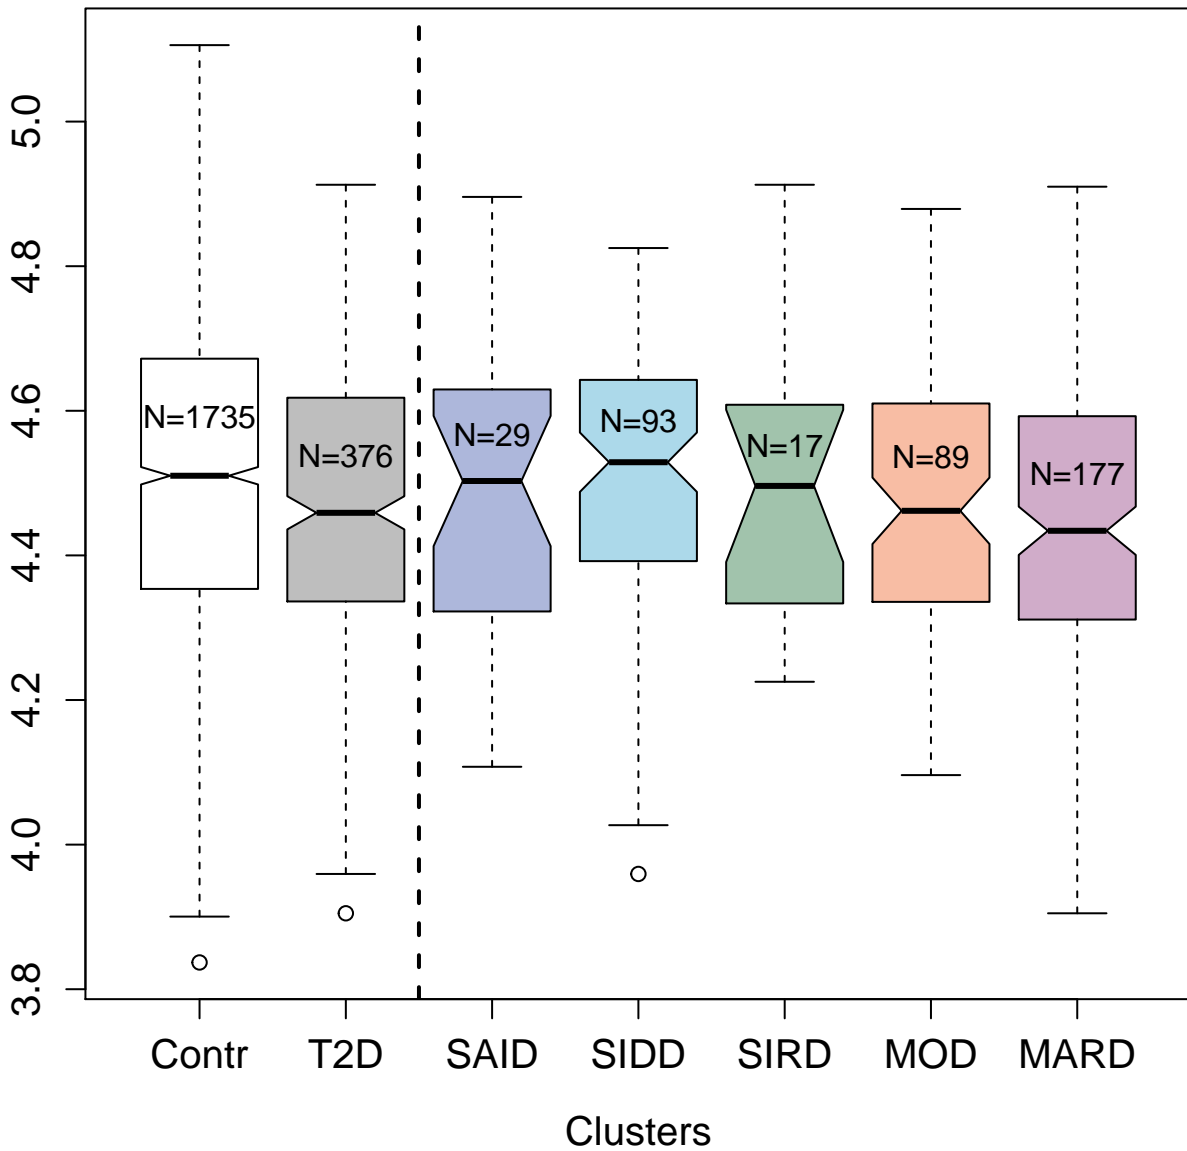

3593-72\_3 : Caspase-3

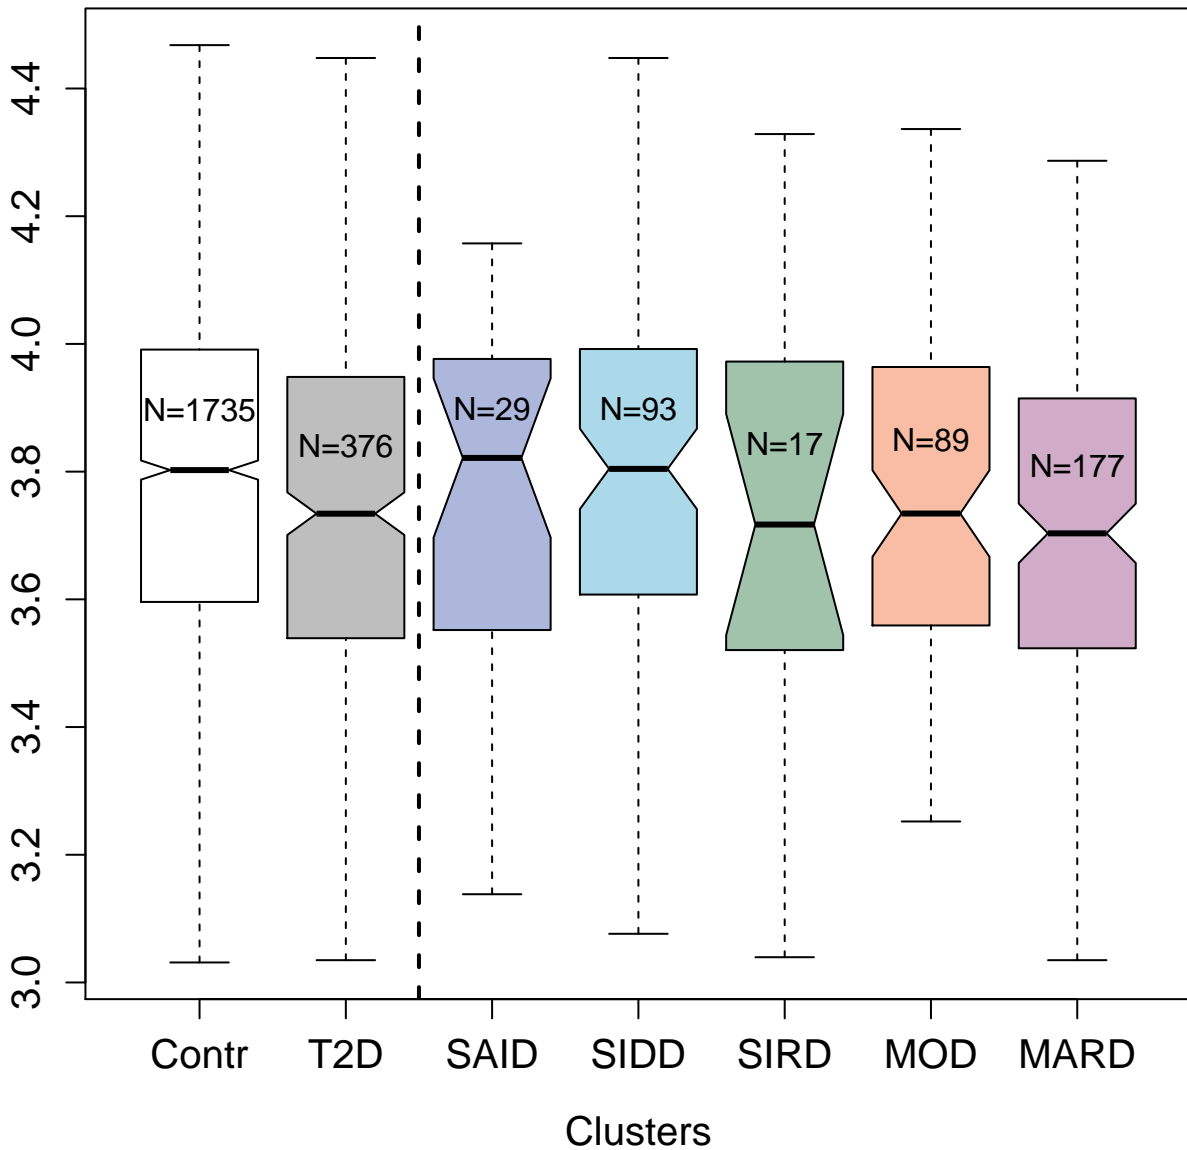

5264-65\_3 : Calreticulin

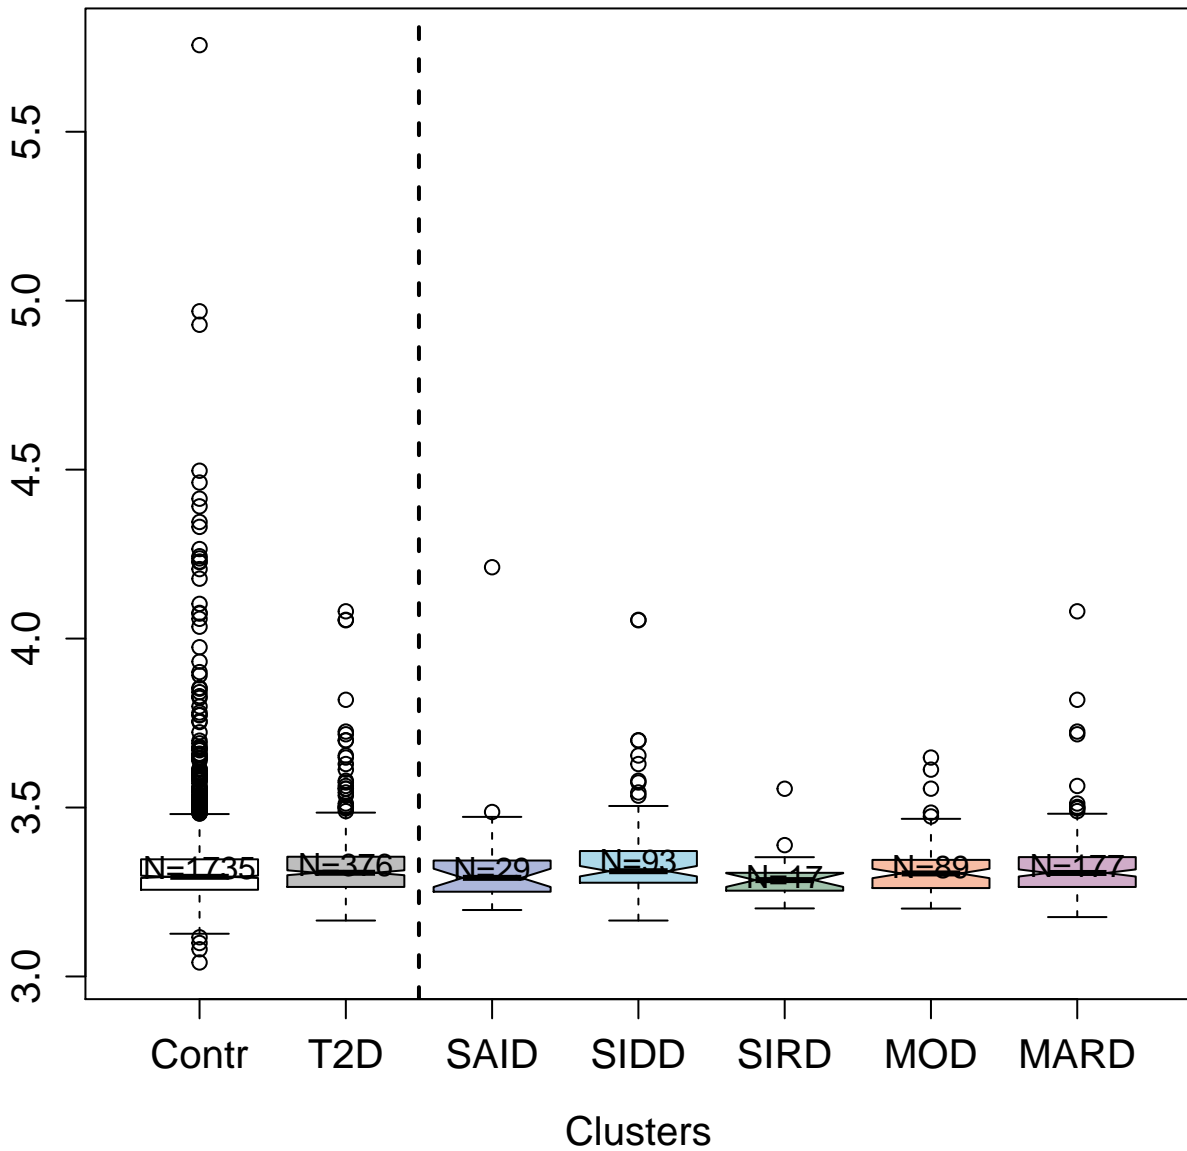

5242-37\_3 : Dual specificity mitogen-activated protein kinase kinase 4

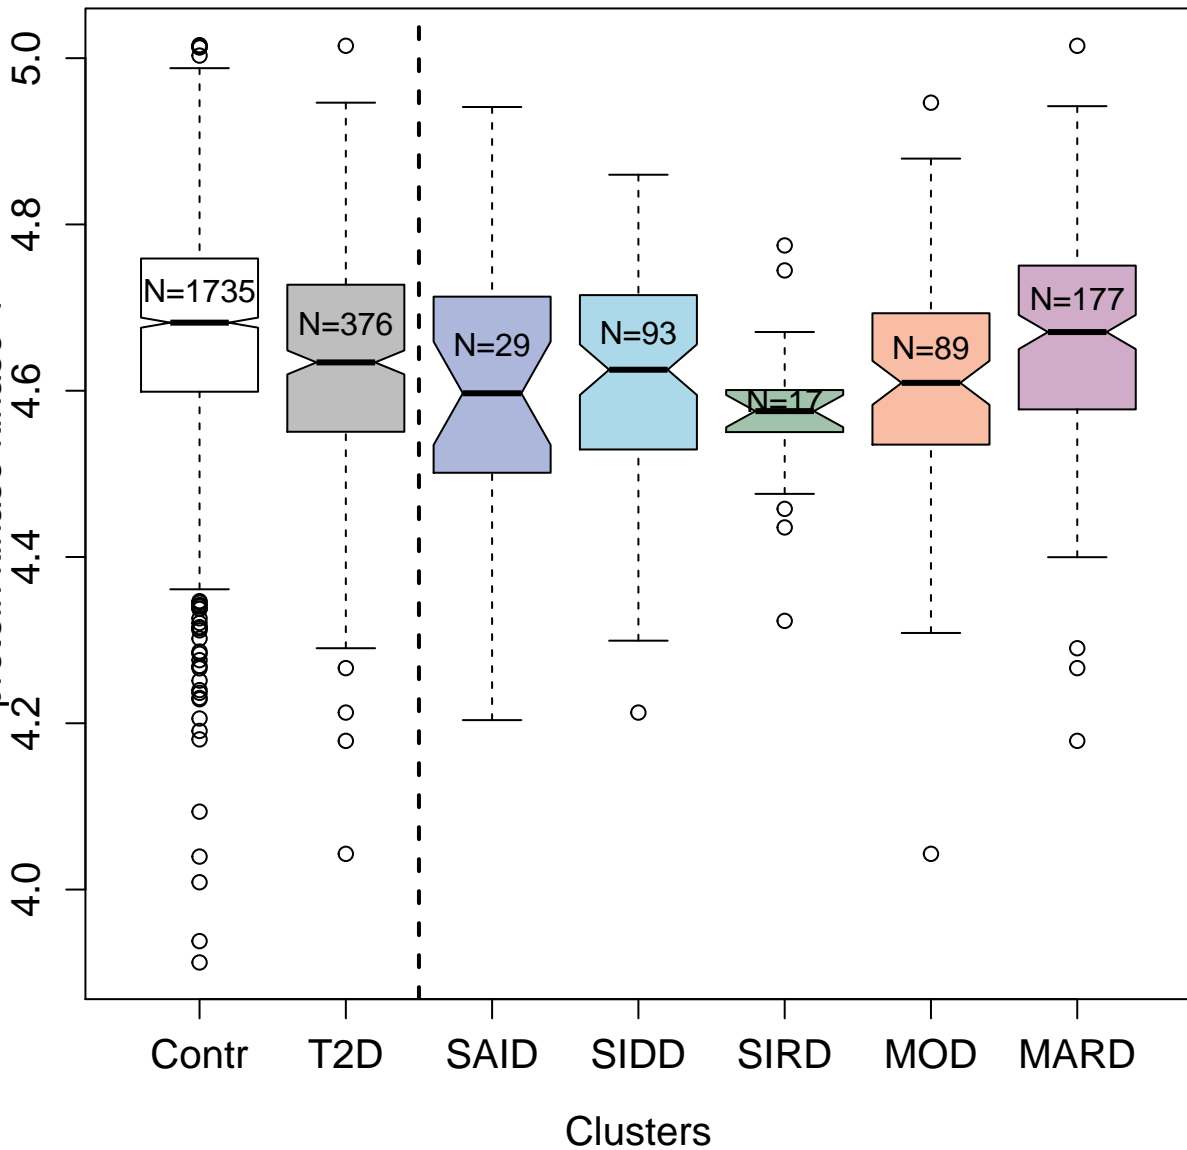

3066-12\_1 : Galectin-3

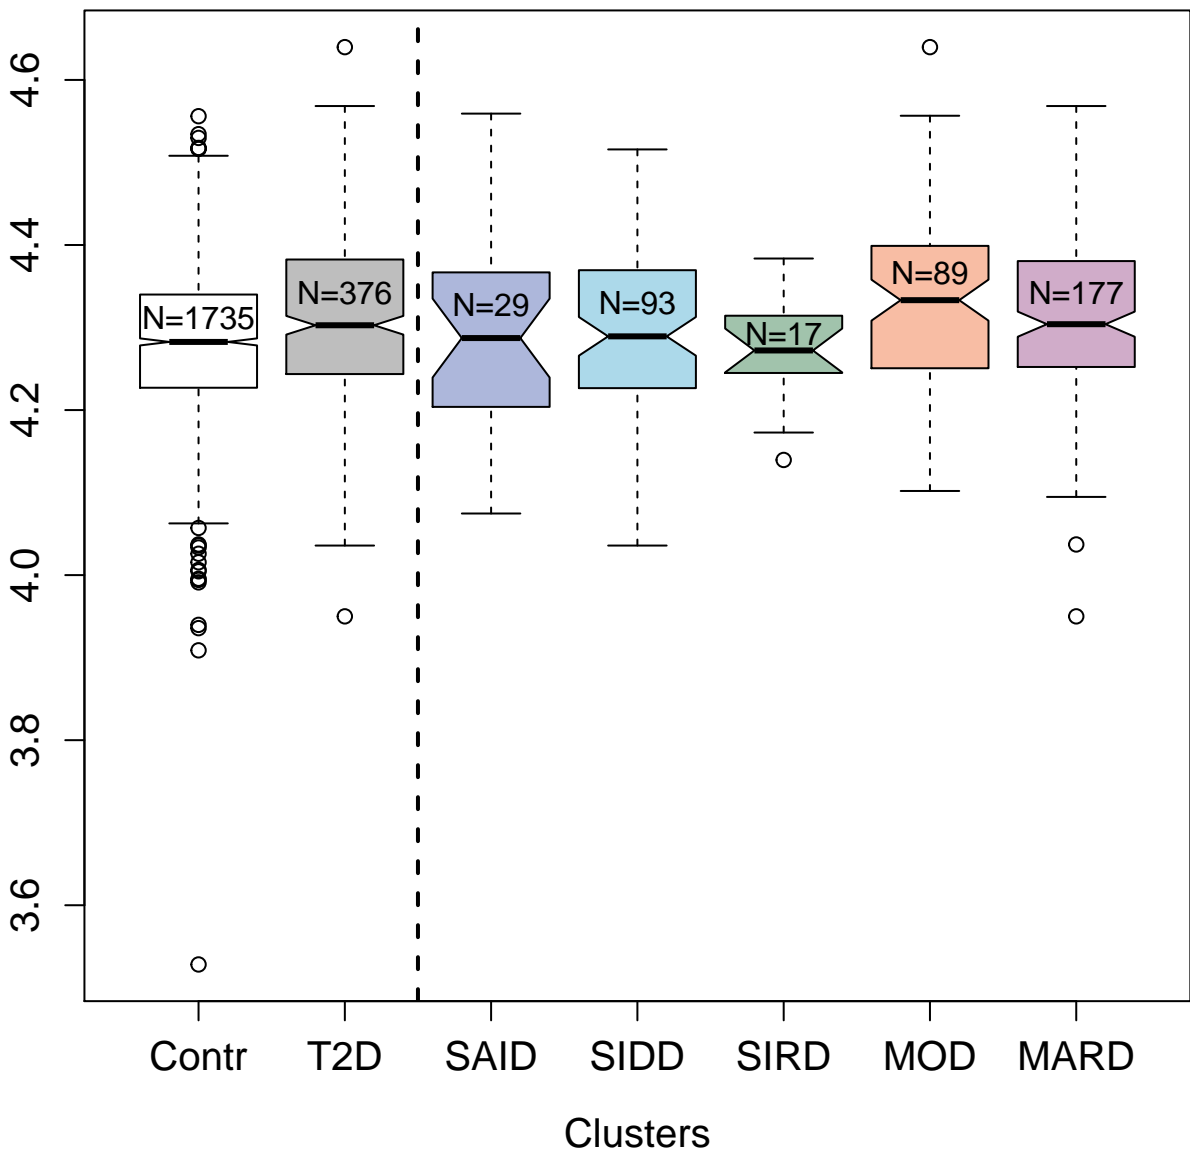



4469-78\_2 : Carbohydrate sulfotransferase 15

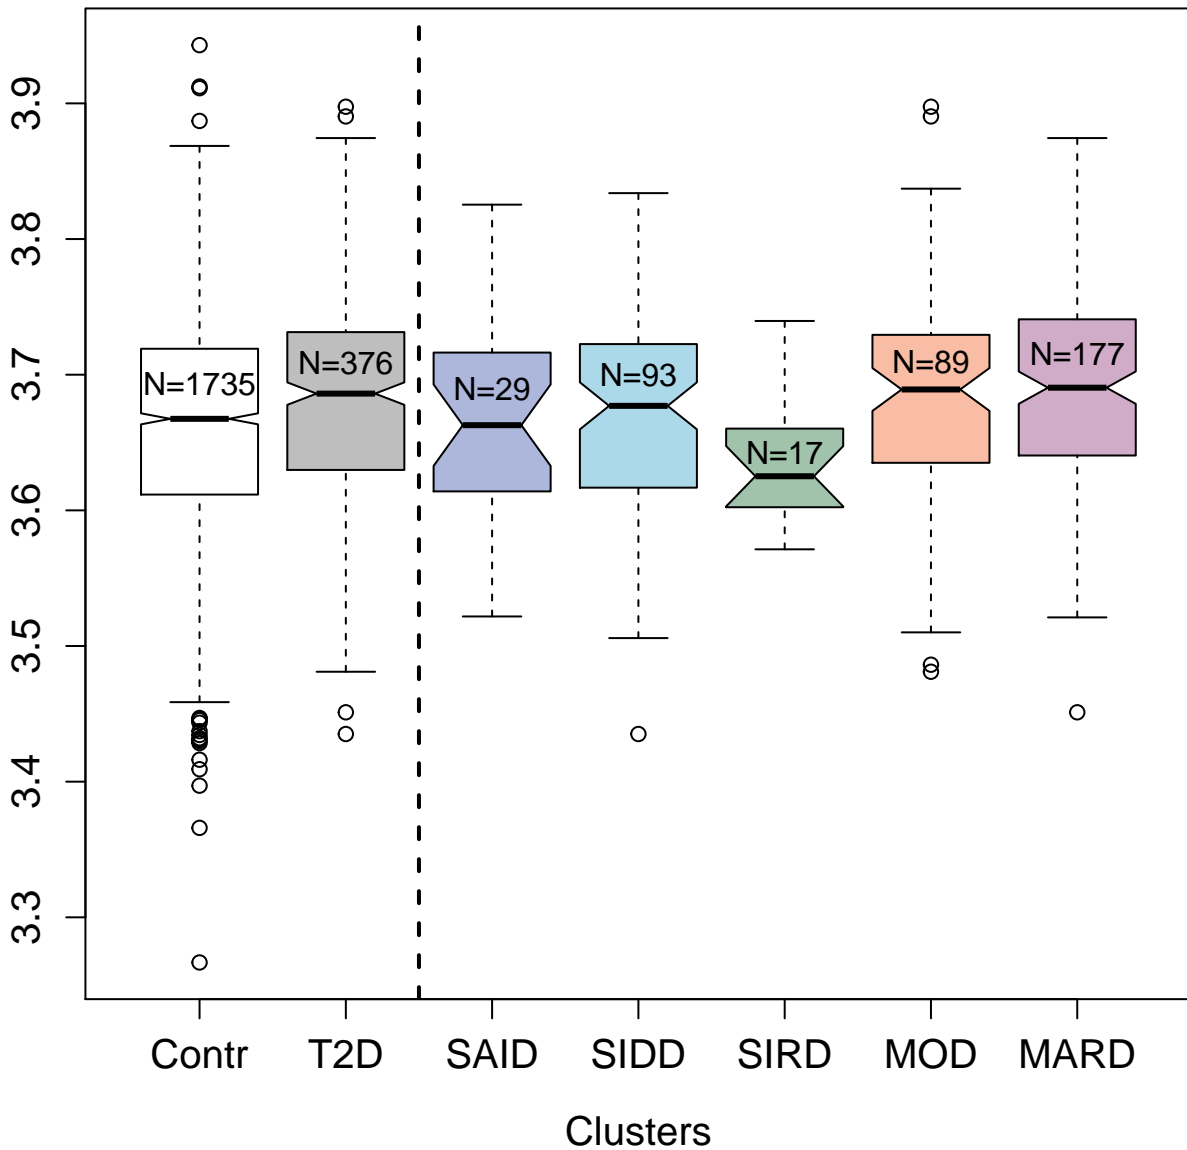

5957-30\_3 : Somatostatin-28

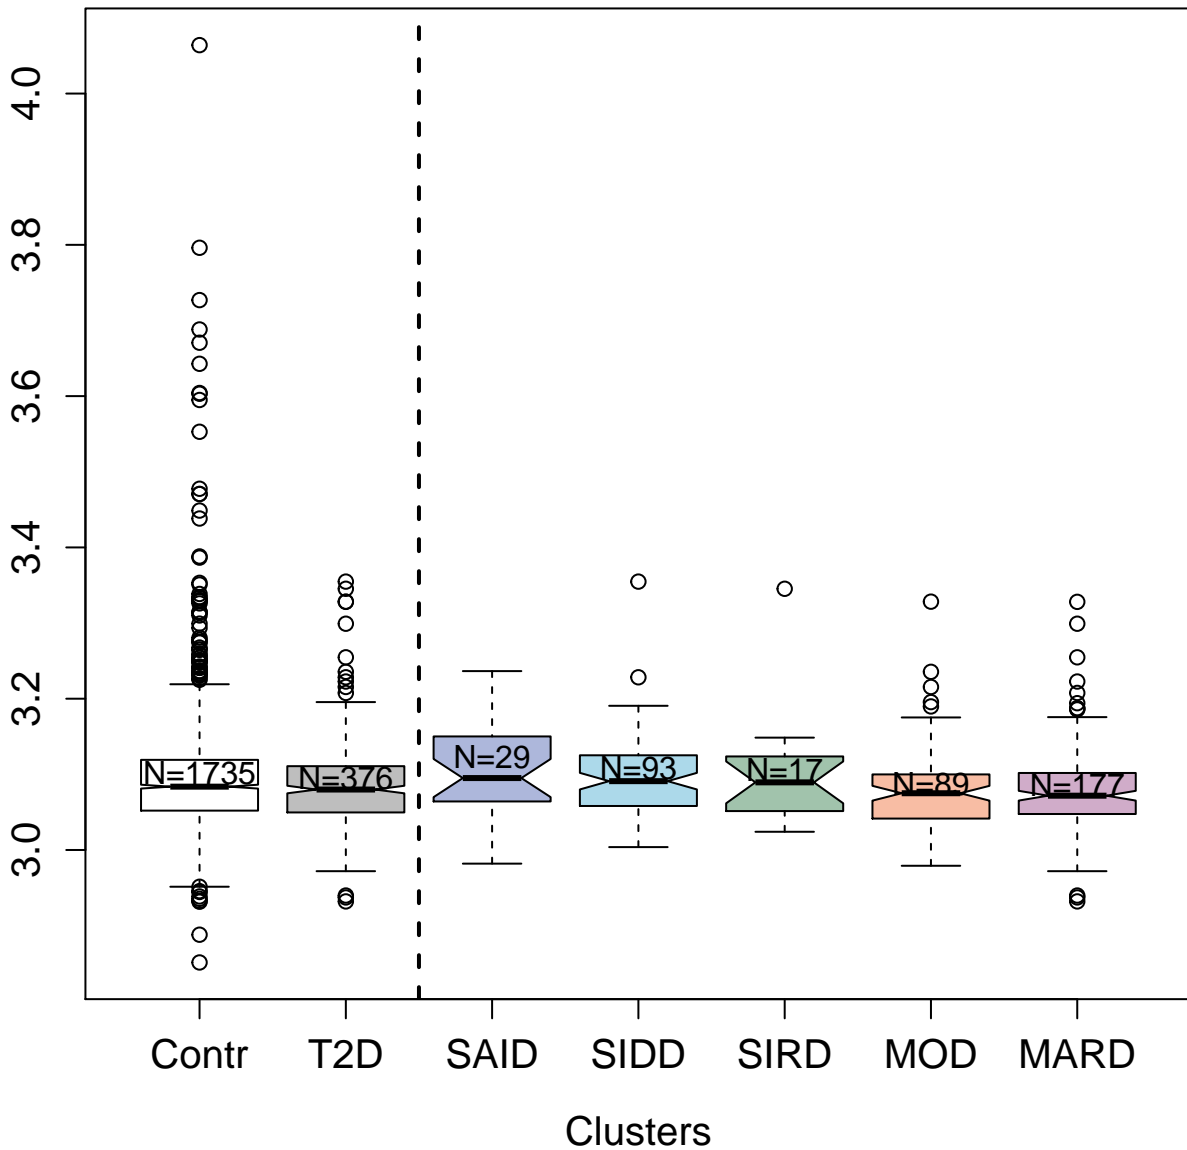

3730-81\_2 : Tumor necrosis factor receptor  
superfamily member 4

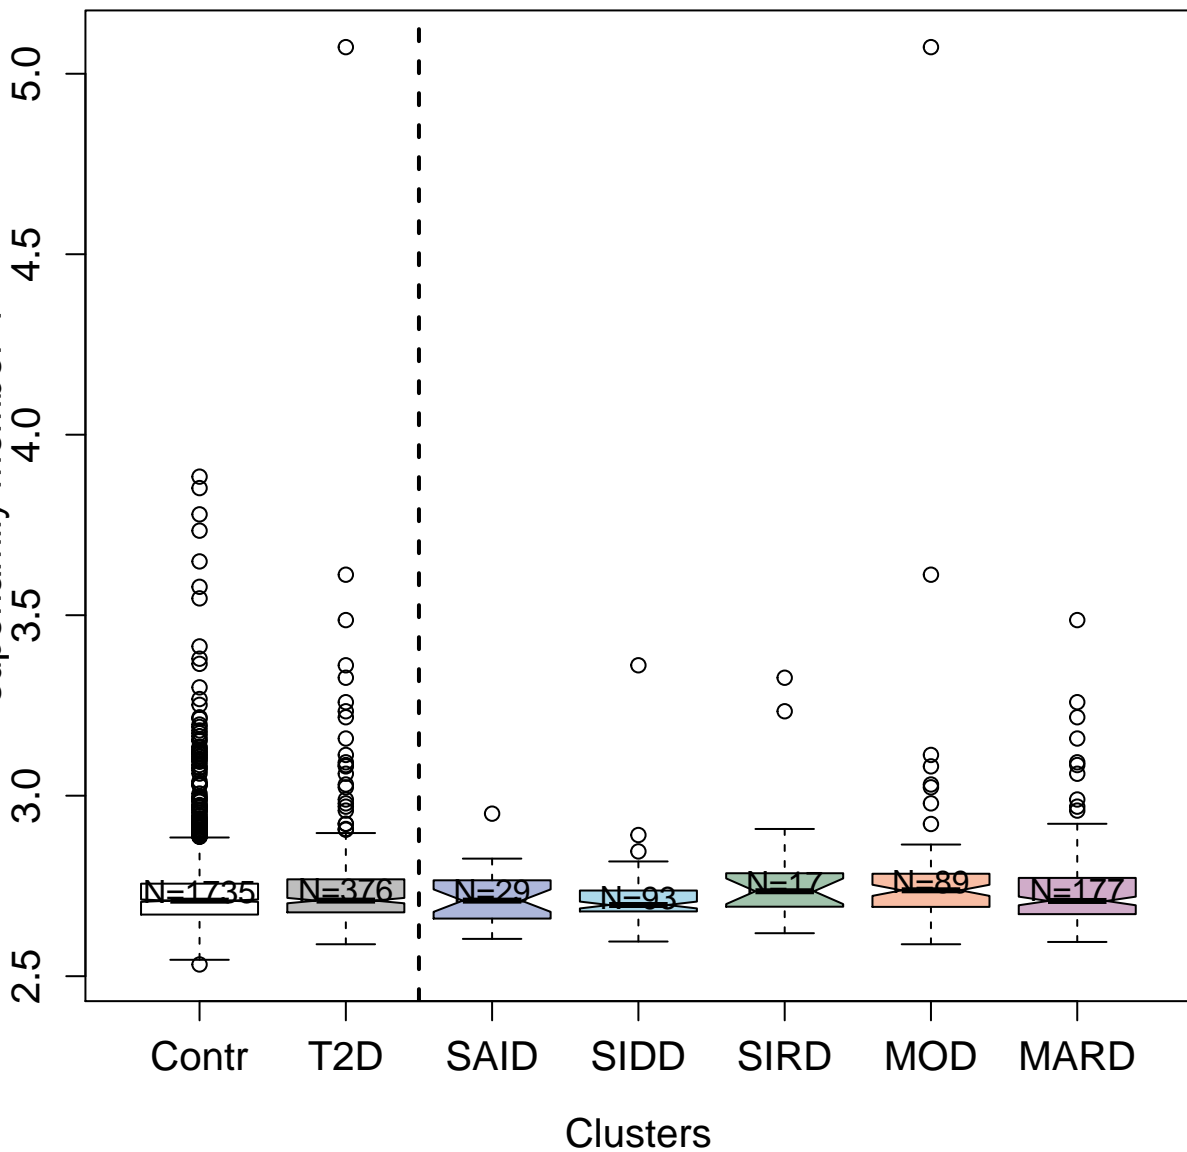

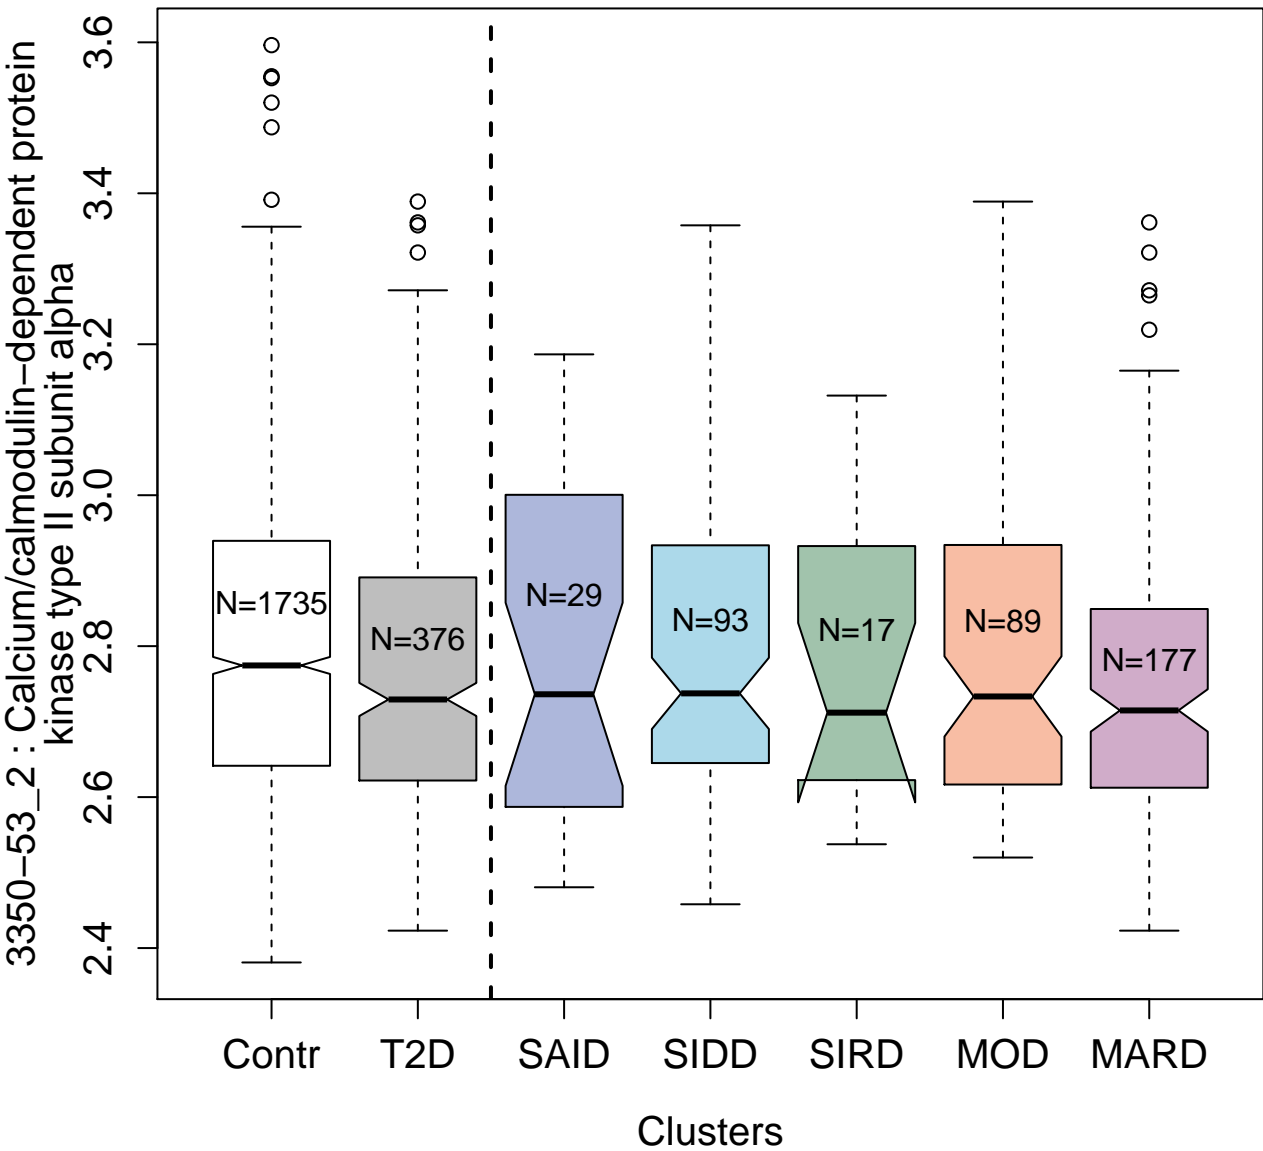

5909-51\_3 : Nucleoside diphosphate kinase A

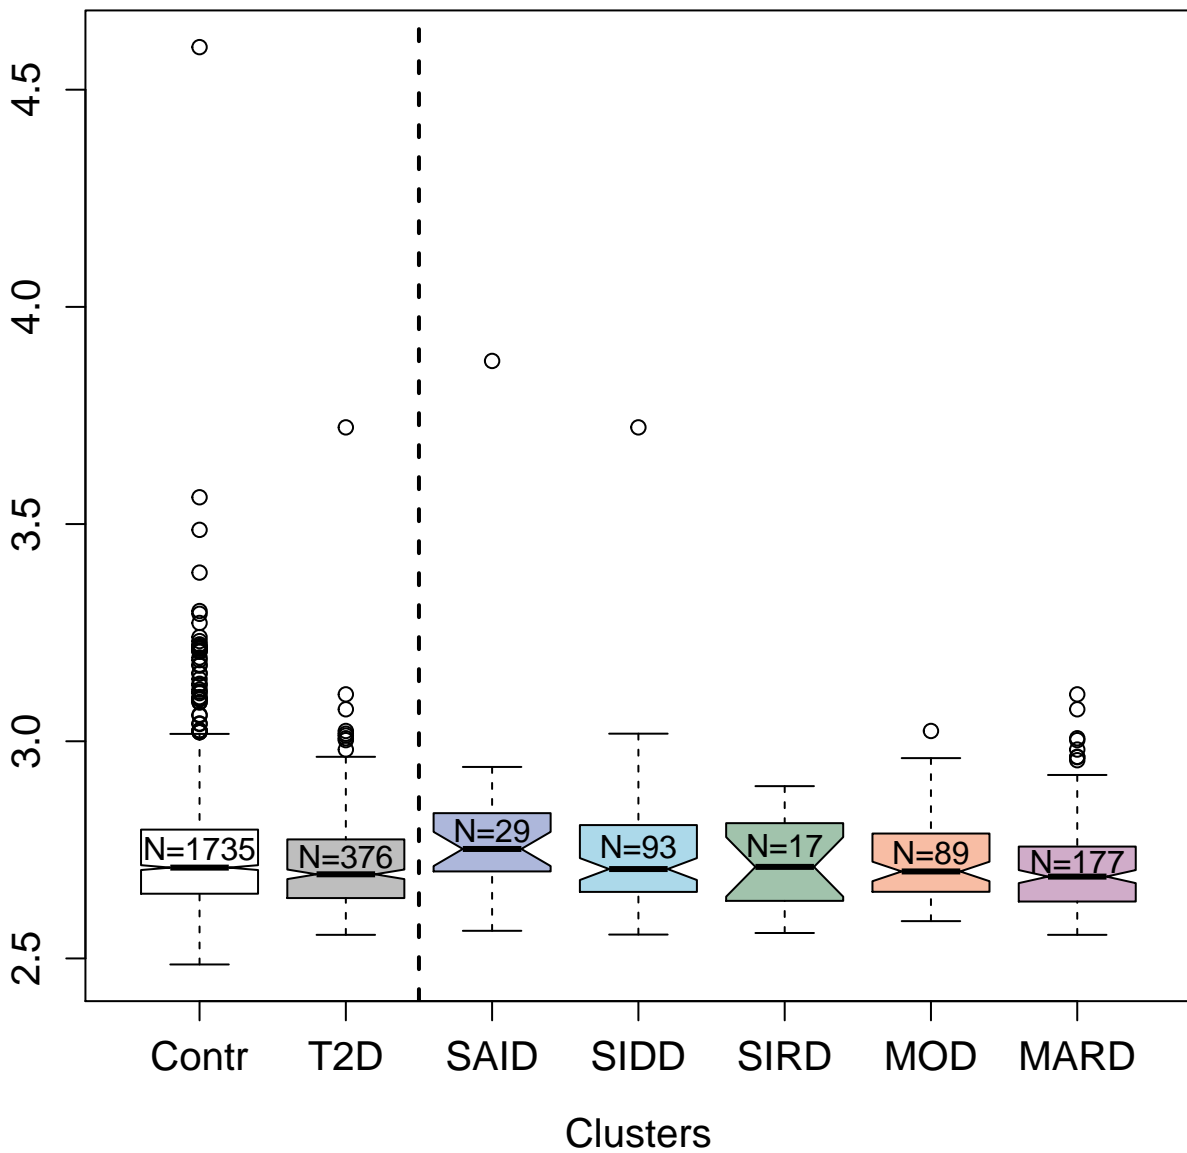

4187-49\_2 : 6-phosphogluconate dehydrogenase;  
decarboxylating

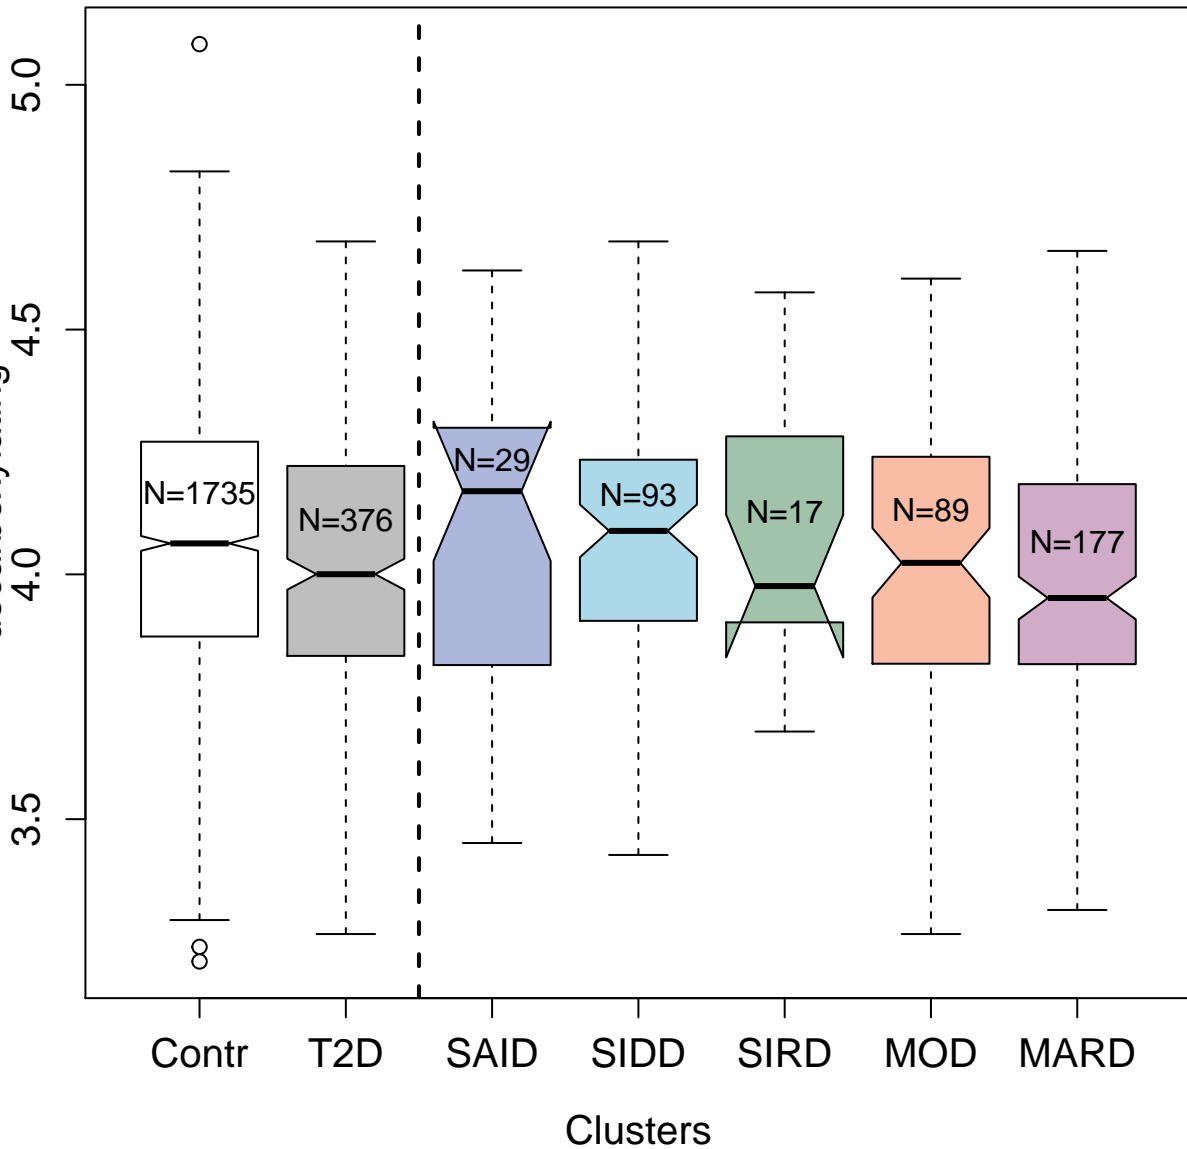

2855-49\_2 : Mitogen-activated protein kinase 3

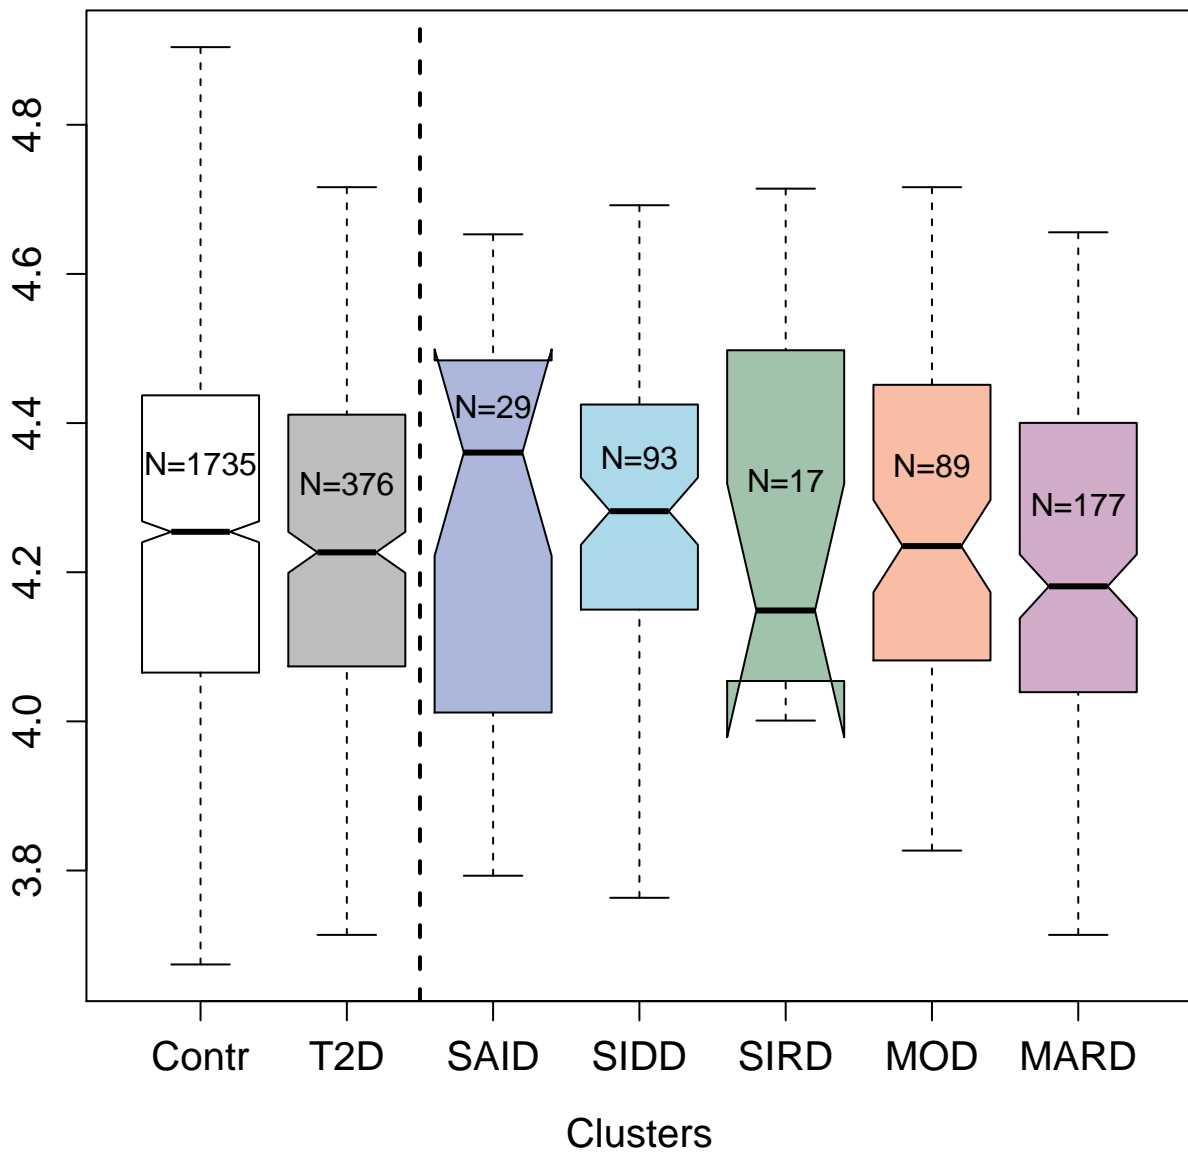

4250-23\_3 : NSFL1 cofactor p47

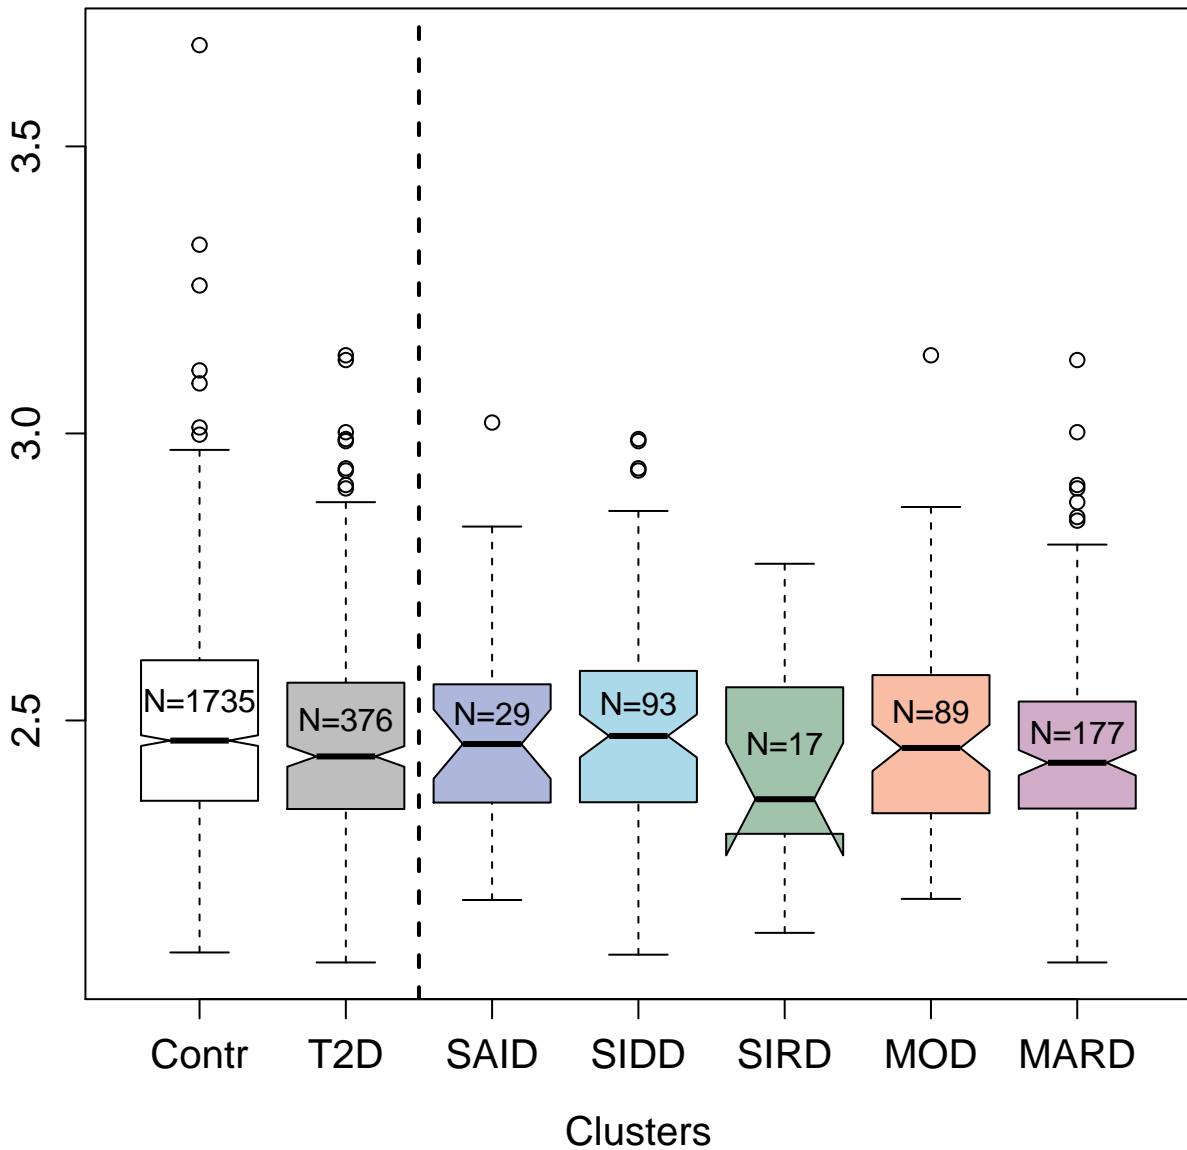



3441-64\_2 : Glycogen synthase kinase-3 alpha/beta

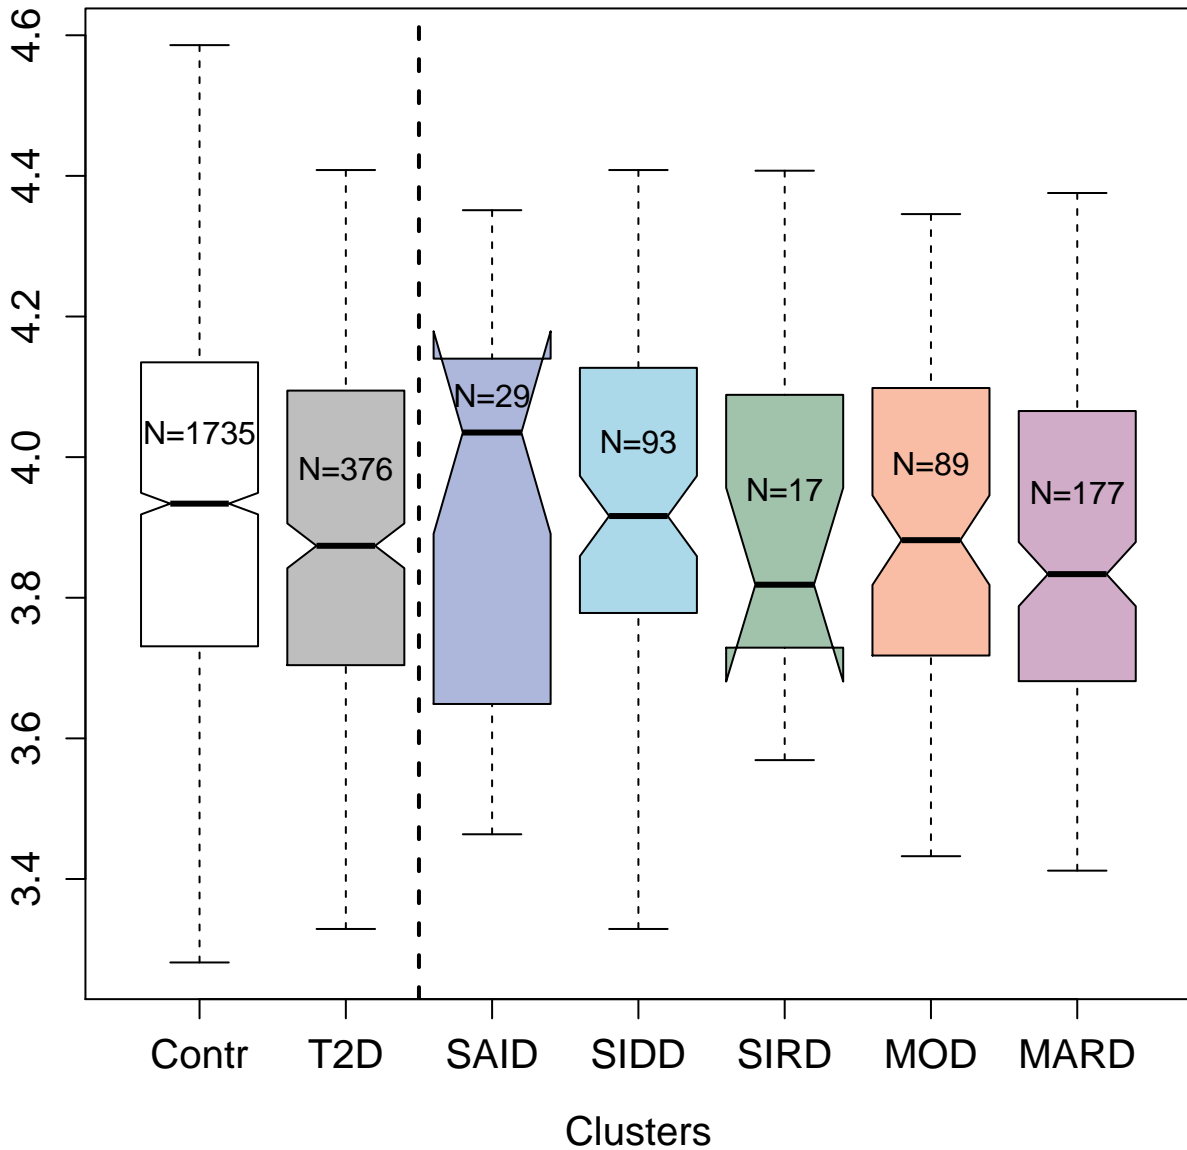

2819-23\_2 : Cadherin-5

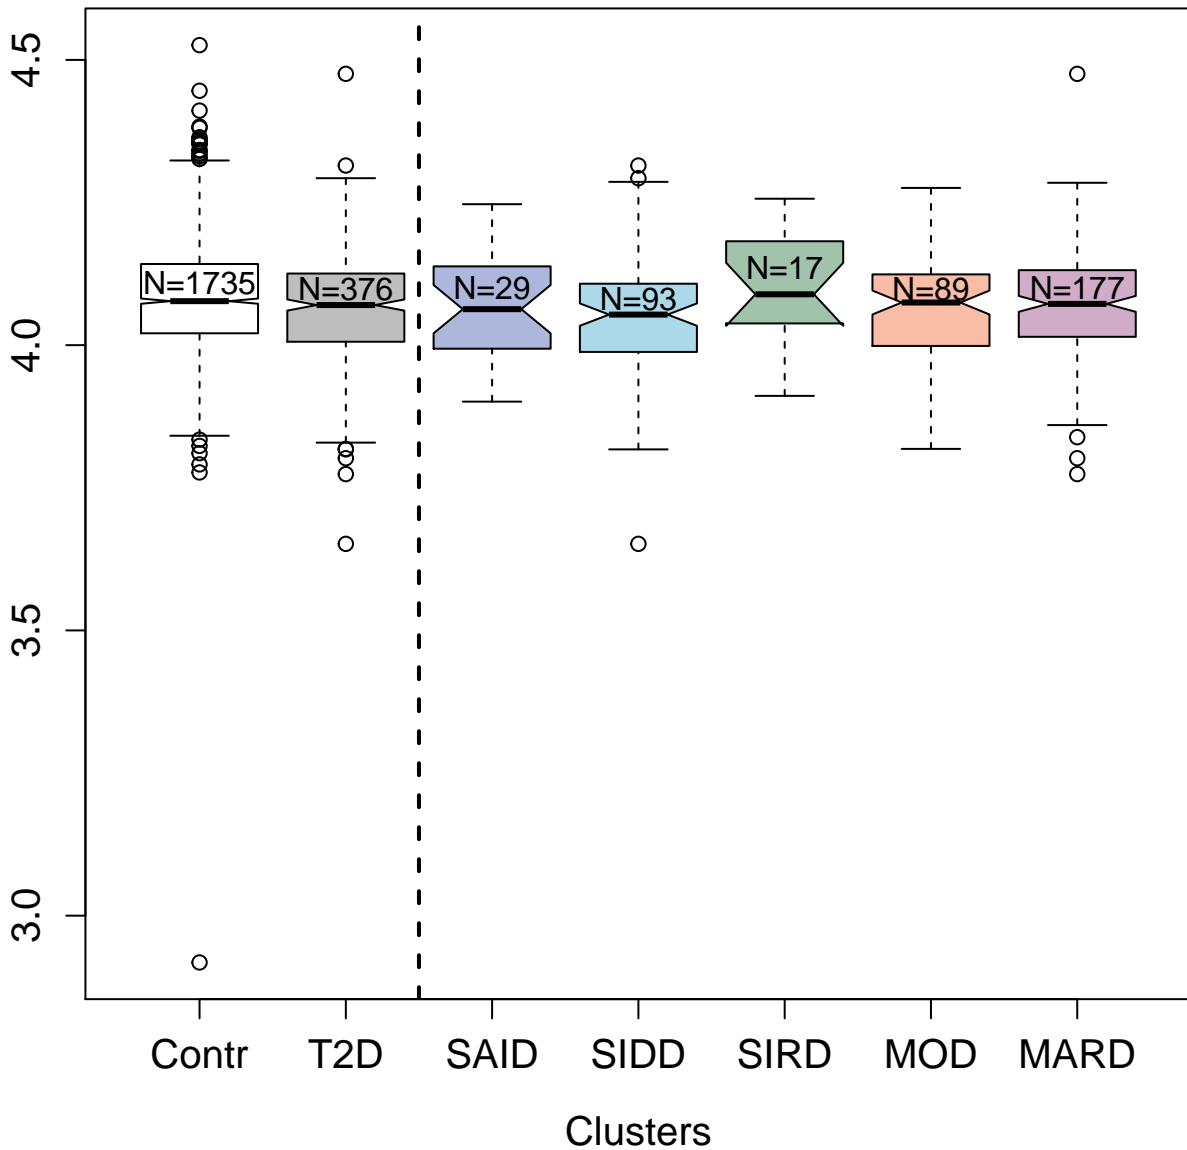

5493-17\_3 : Serine/threonine-protein kinase WNK3

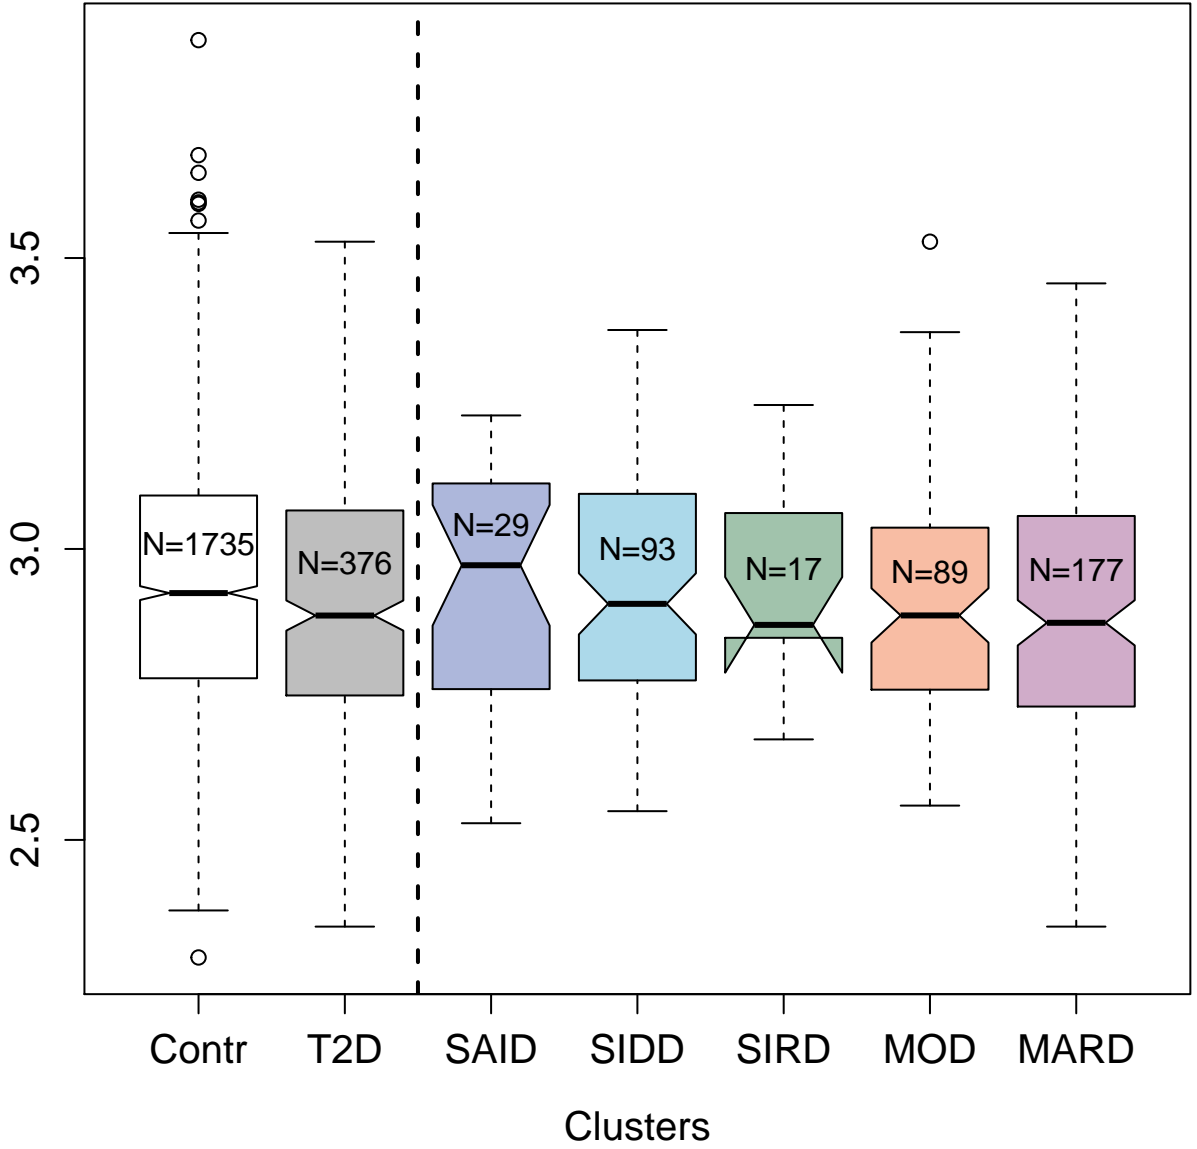

9199-6\_3 : Ubiquitin-conjugating enzyme E2 G2

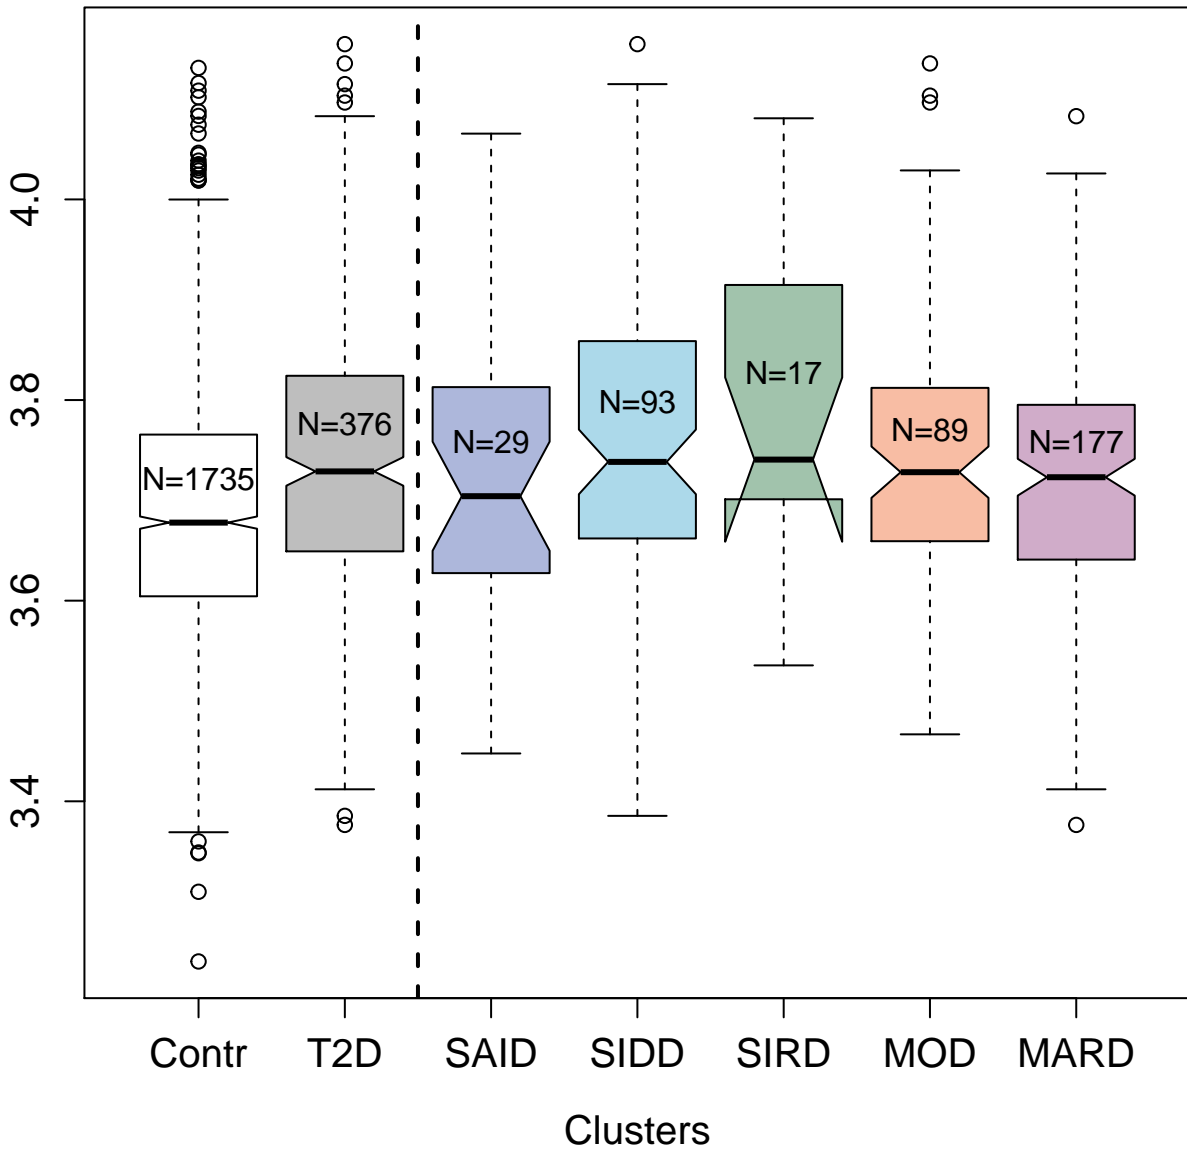

5139-32\_3 : Netrin receptor UNC5C

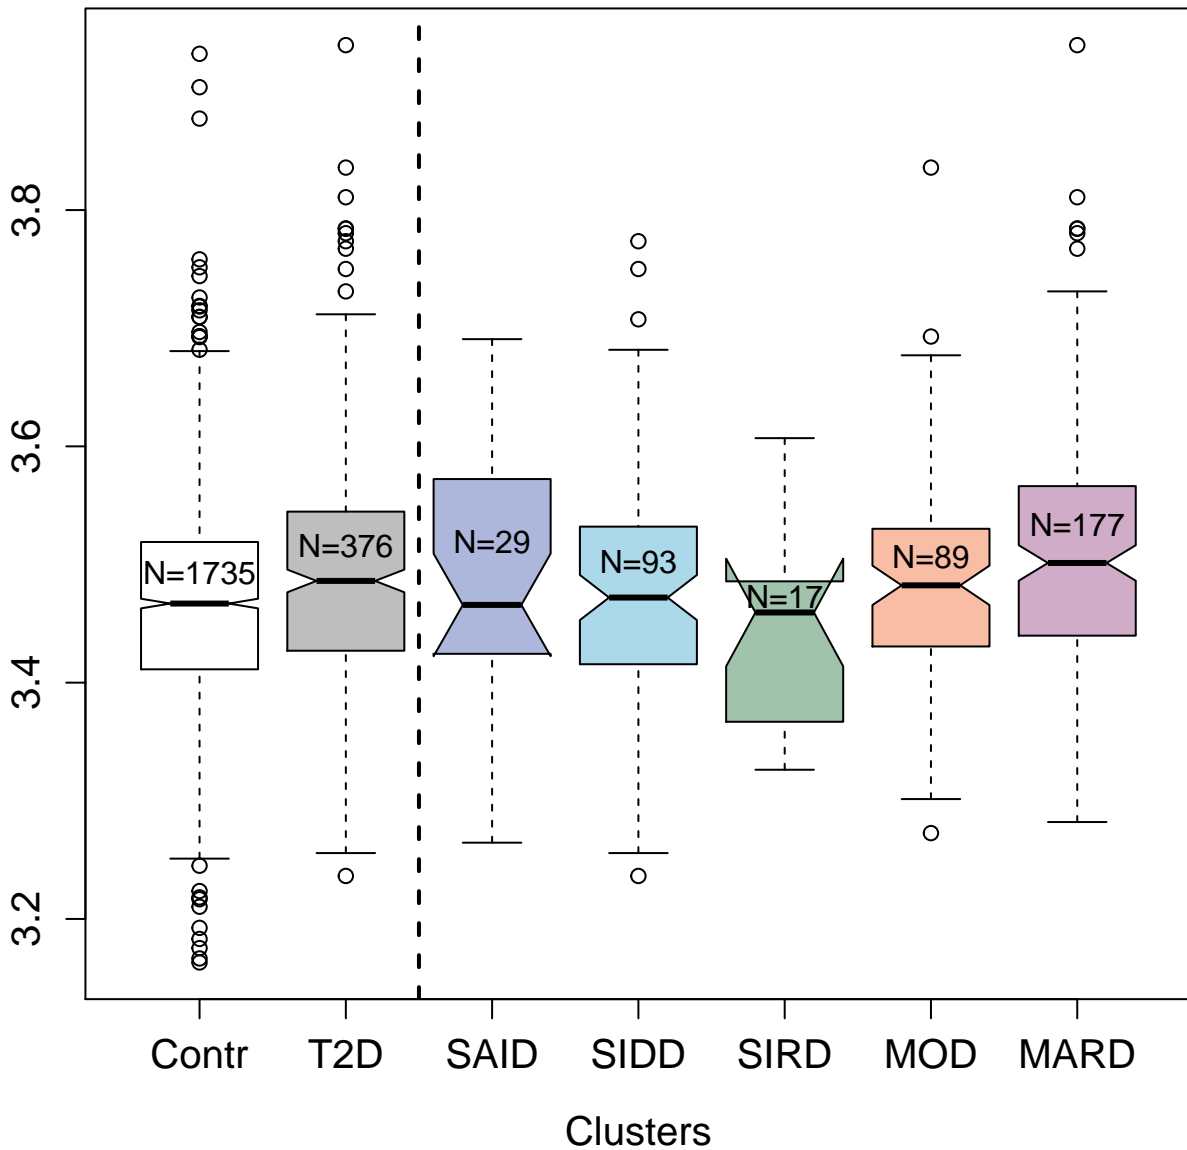

3416-2\_2 : Tyrosine-protein kinase BTK

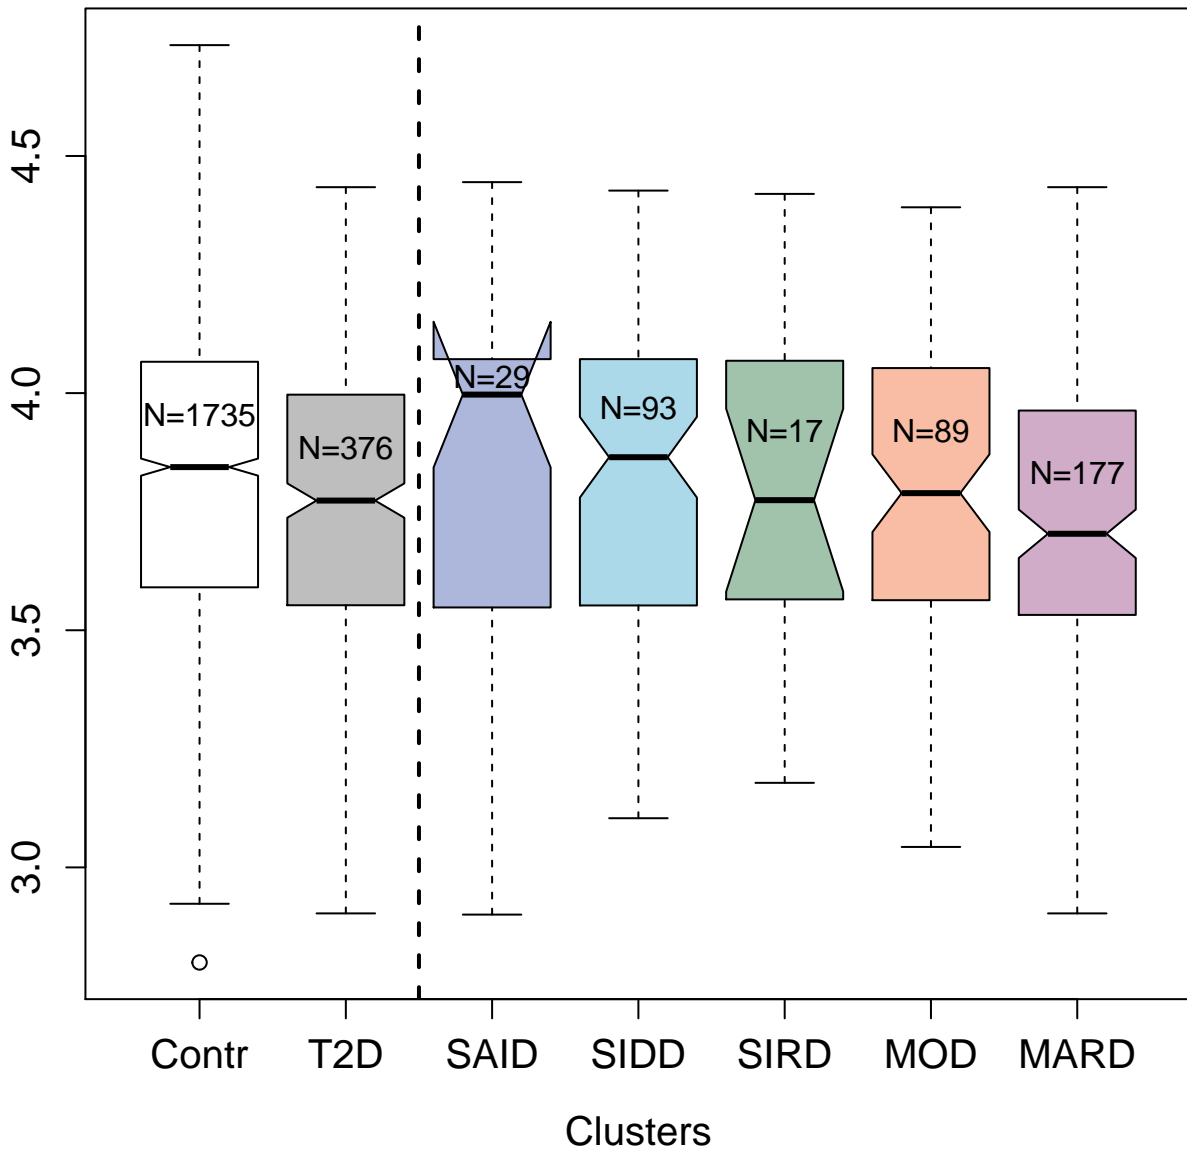

4292-5\_3 : Alpha-soluble NSF attachment protein

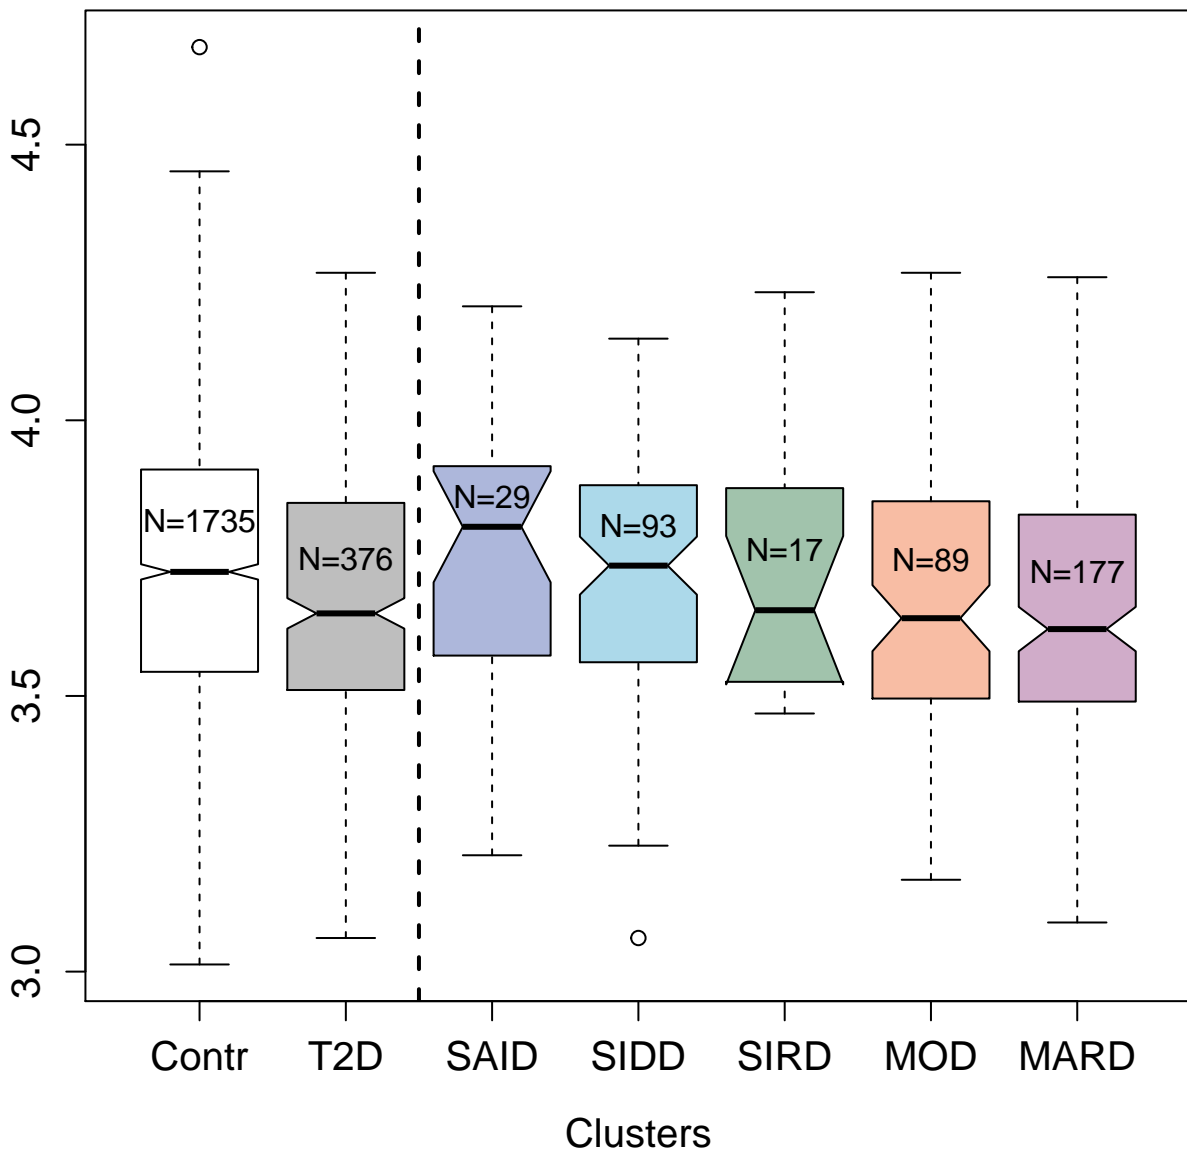

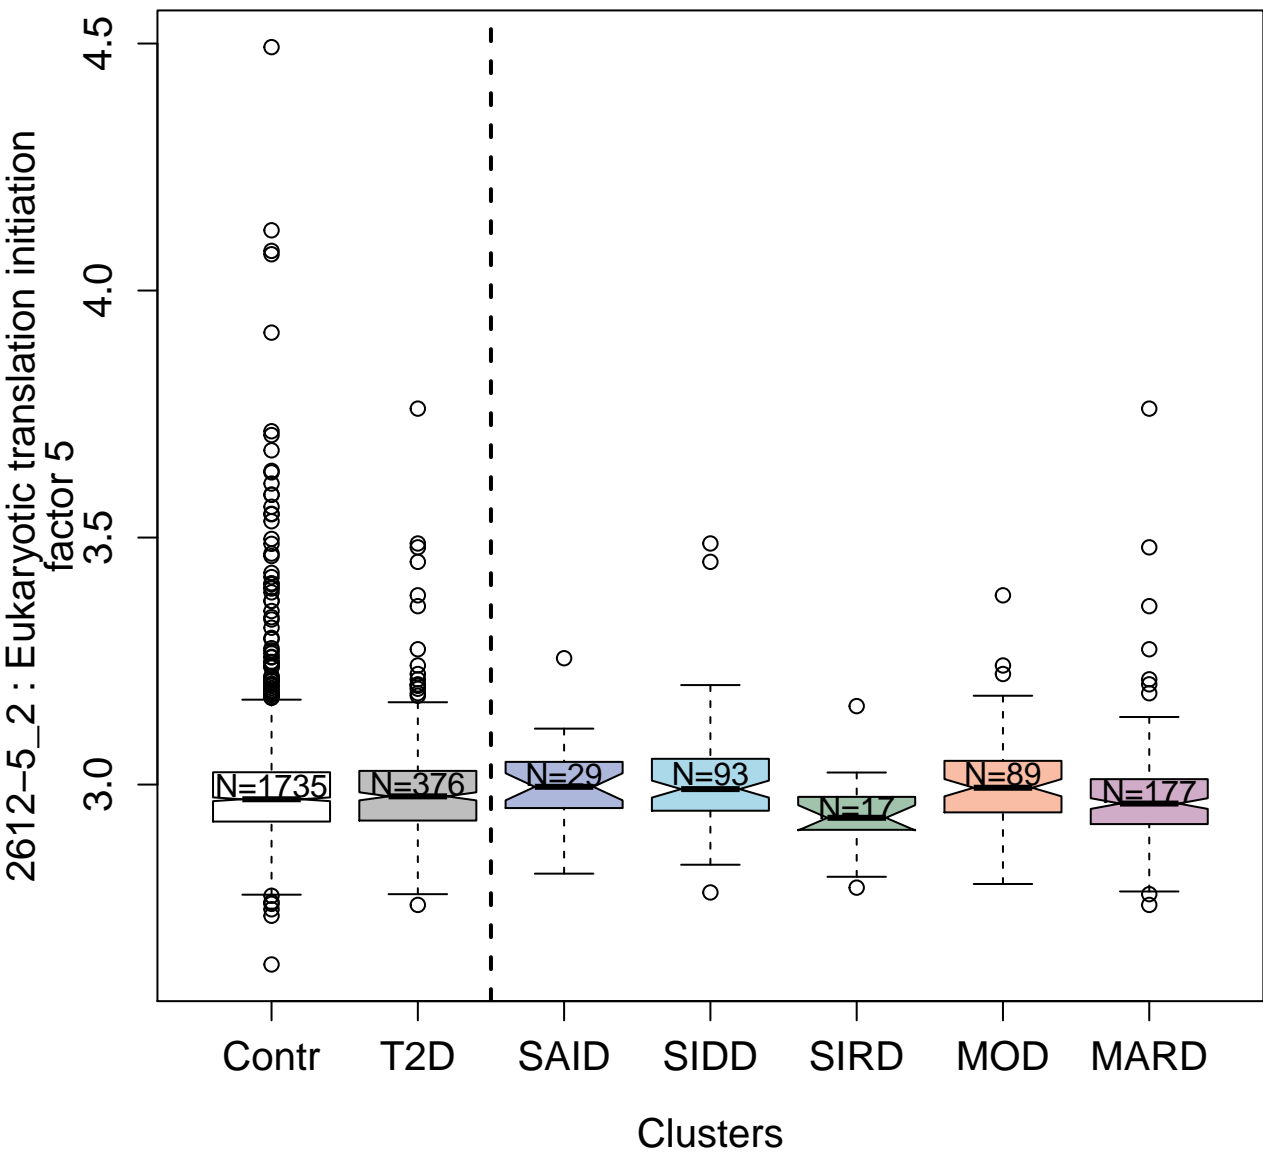



2877-3\_1 : SUMO-conjugating enzyme UBC9

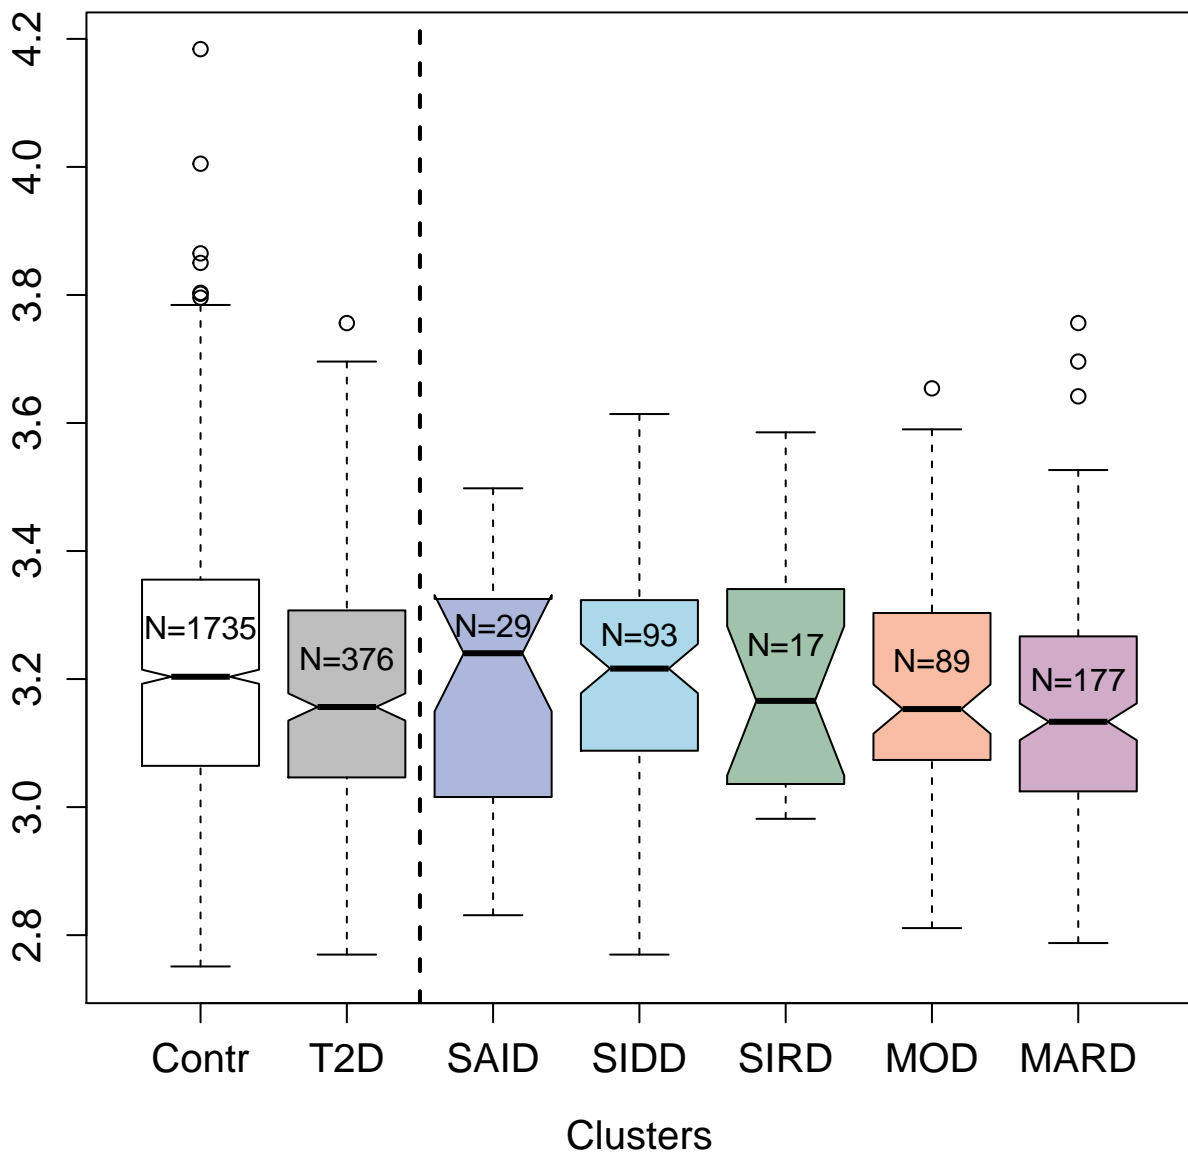

13125-45\_3 : Vitronectin

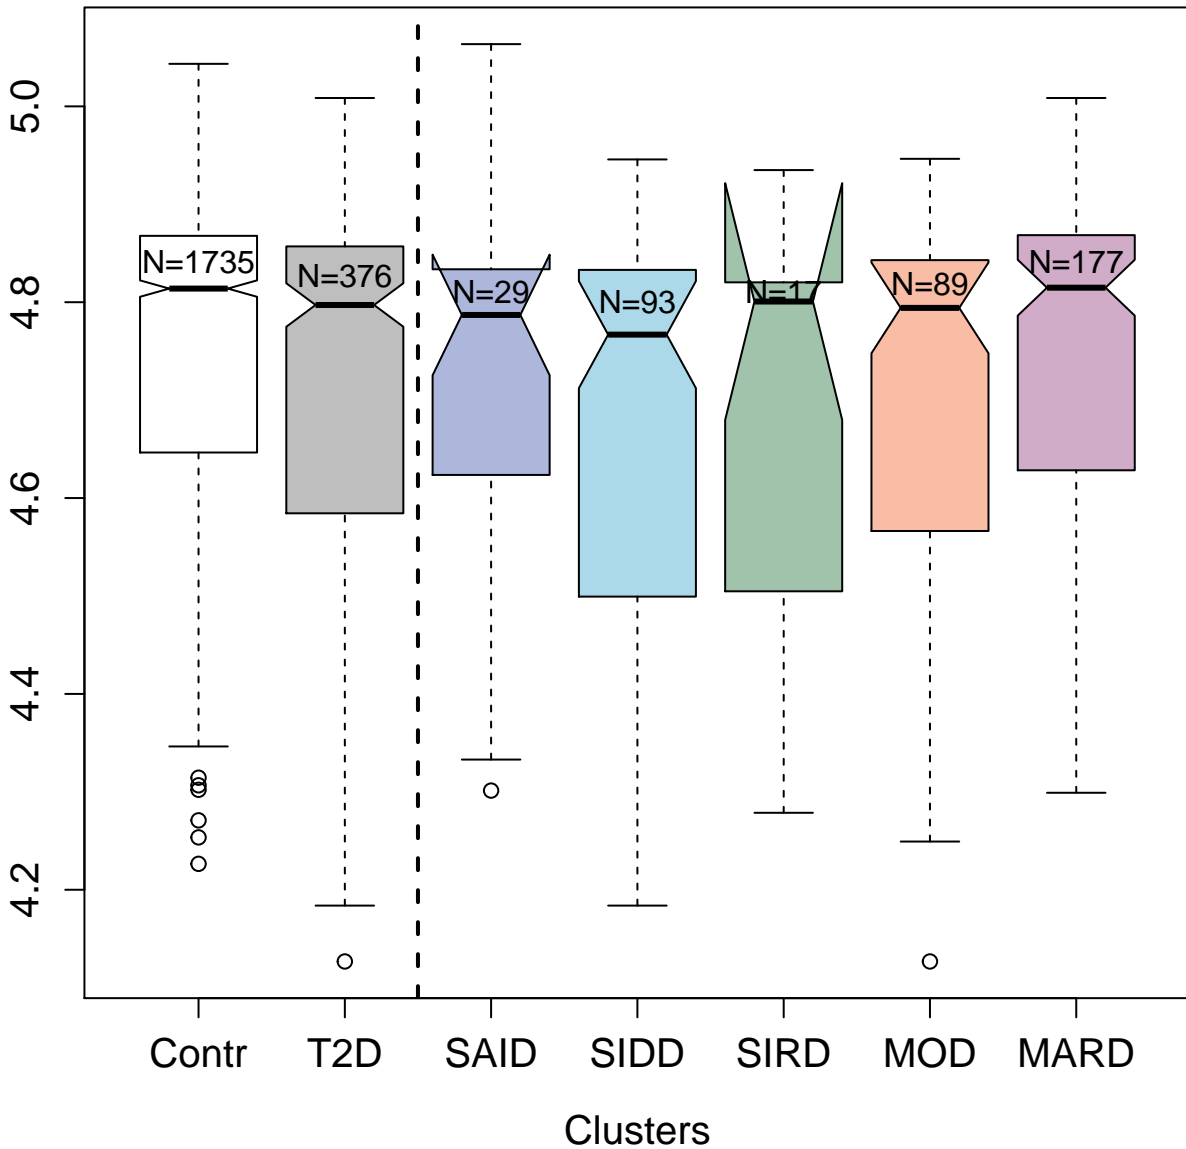

3072-4\_2 : Interleukin-13

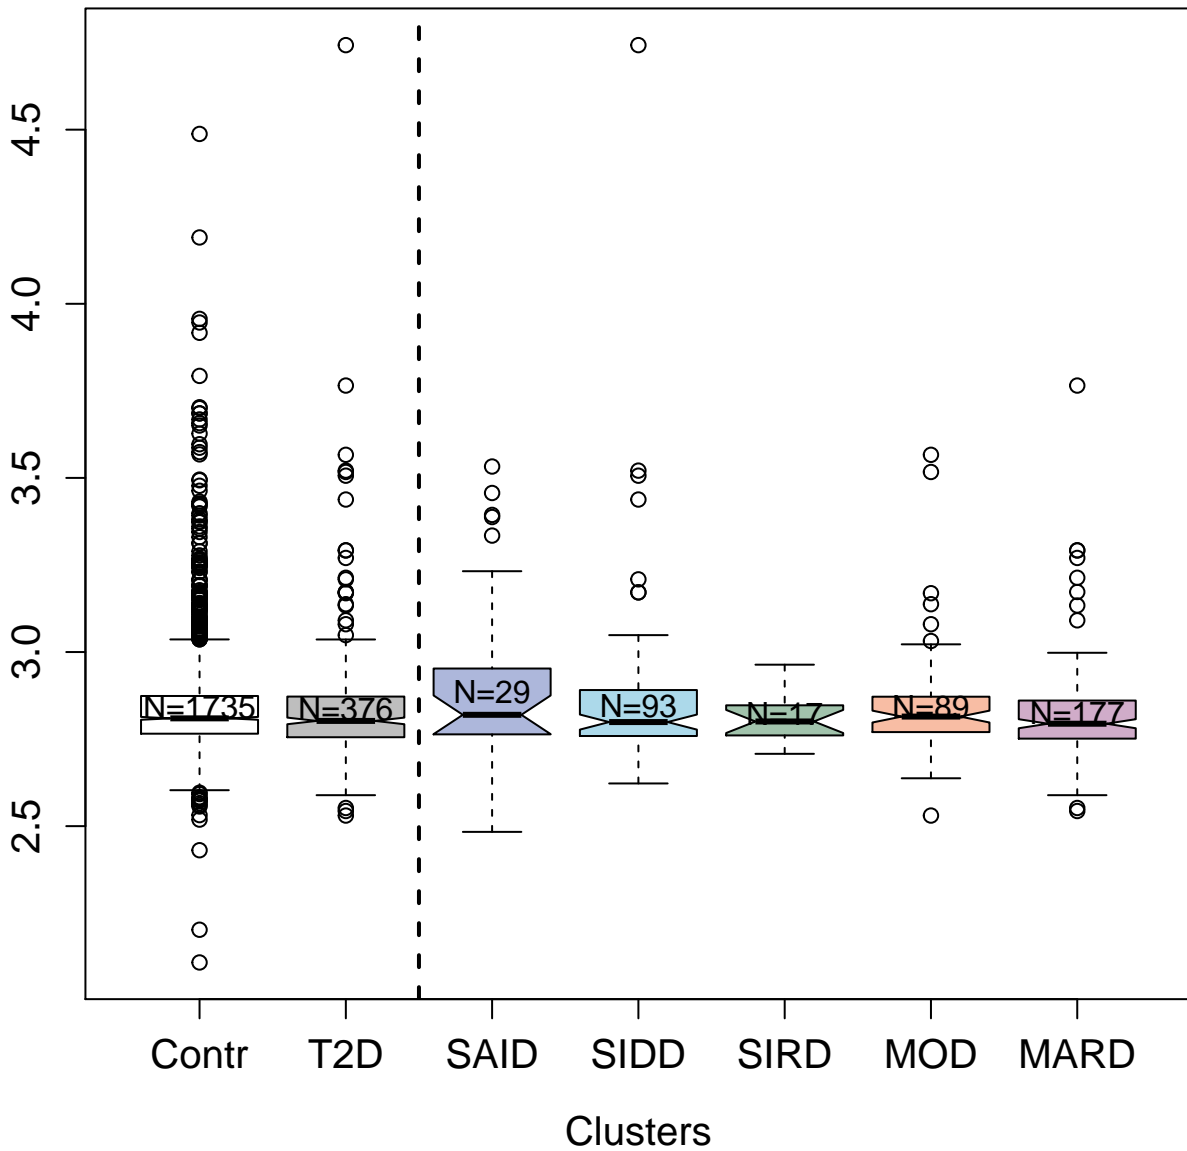

4924-32\_1 : Interstitial collagenase

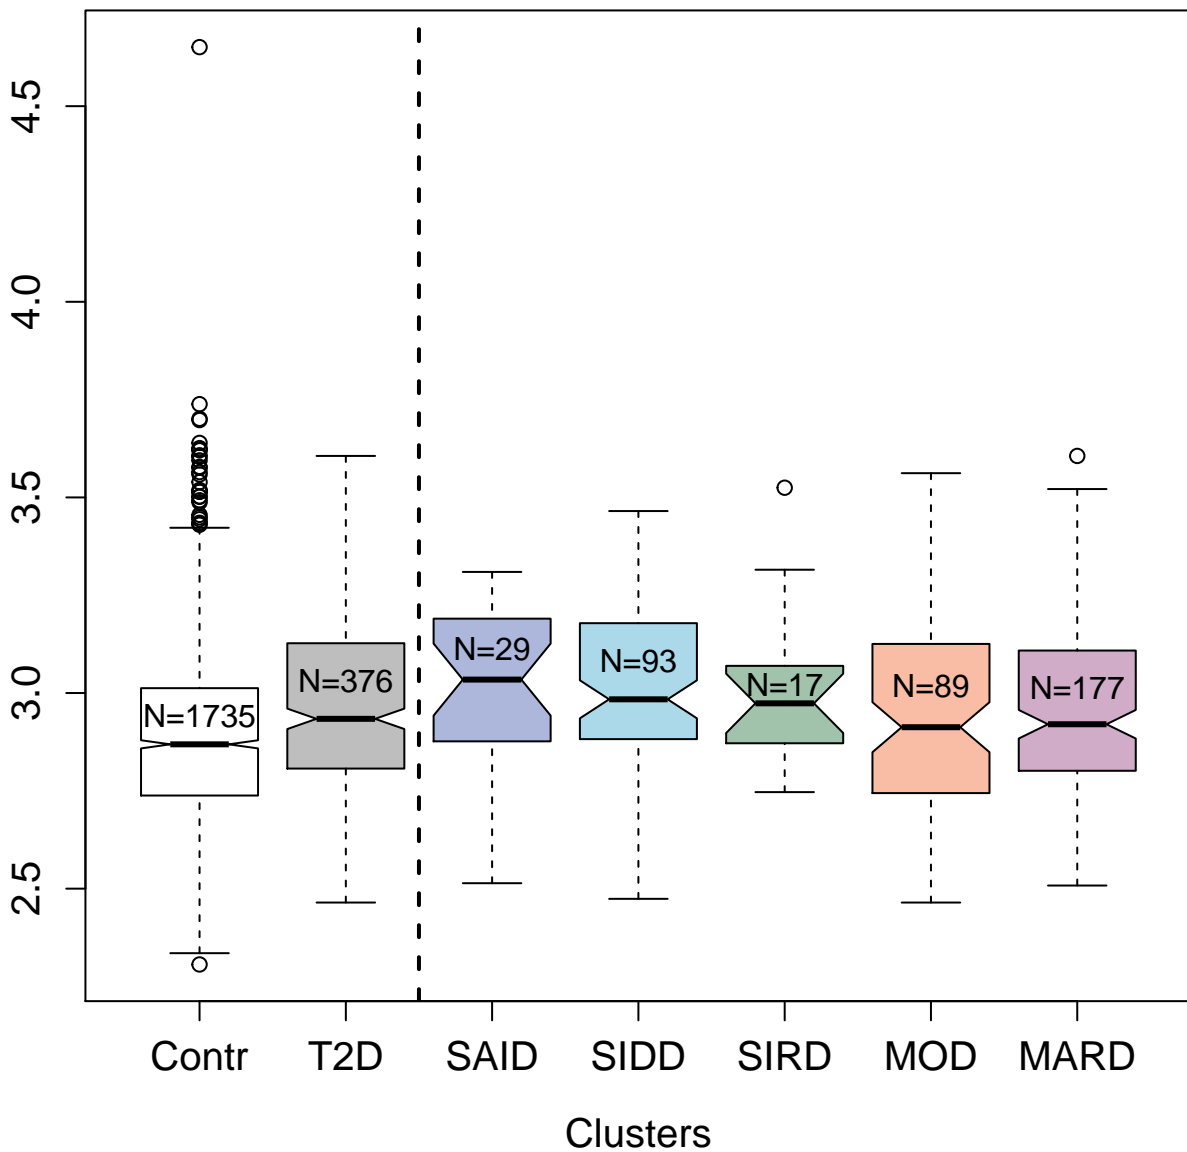

7660-21\_3 : Tropomyosin alpha-4 chain

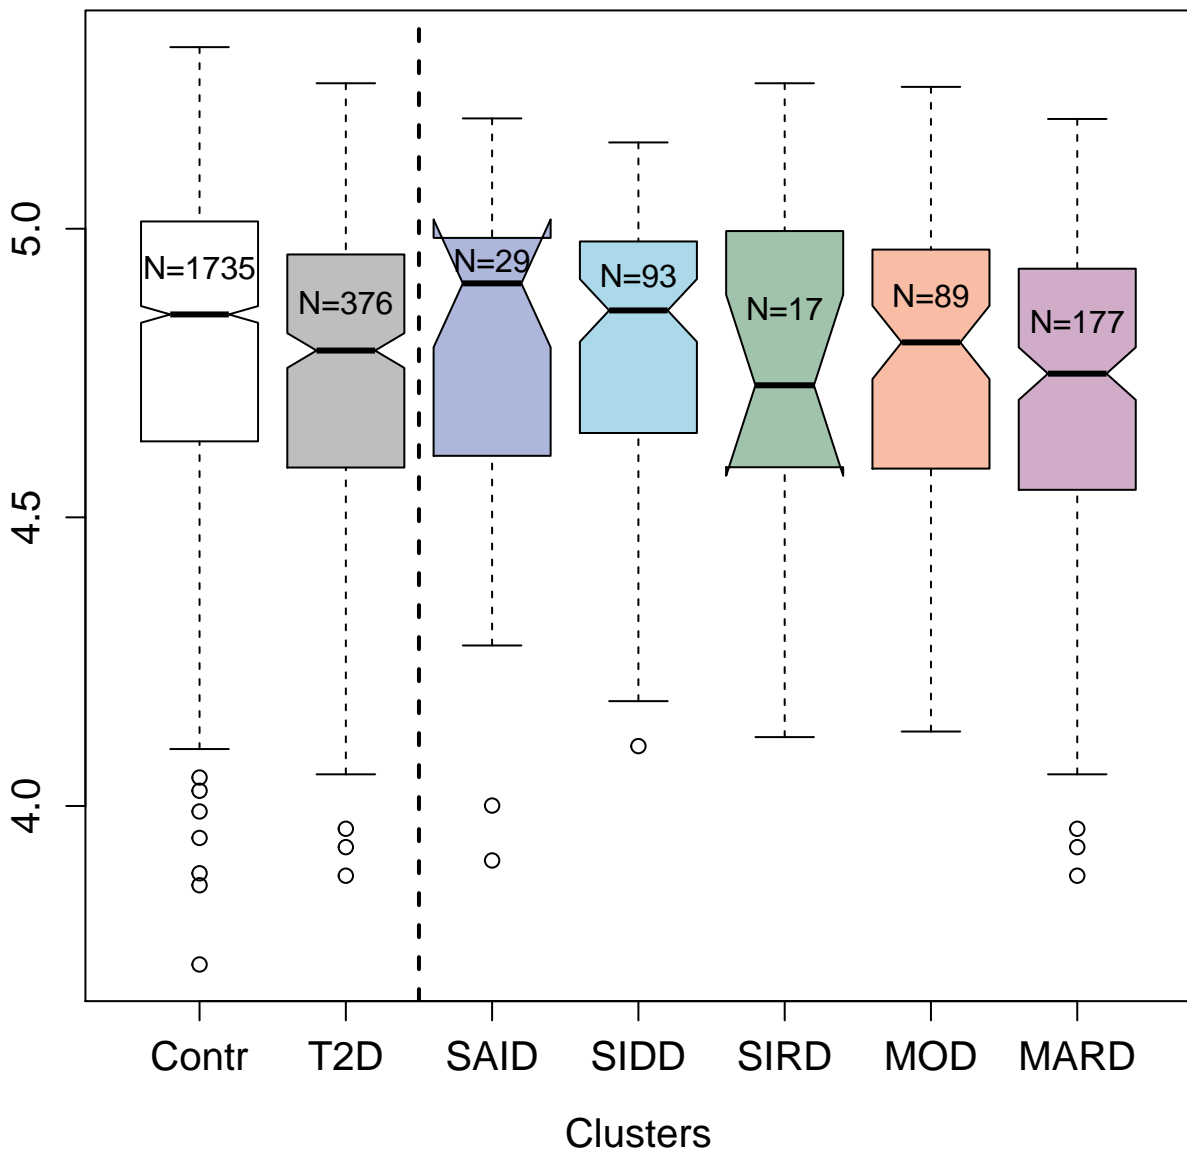

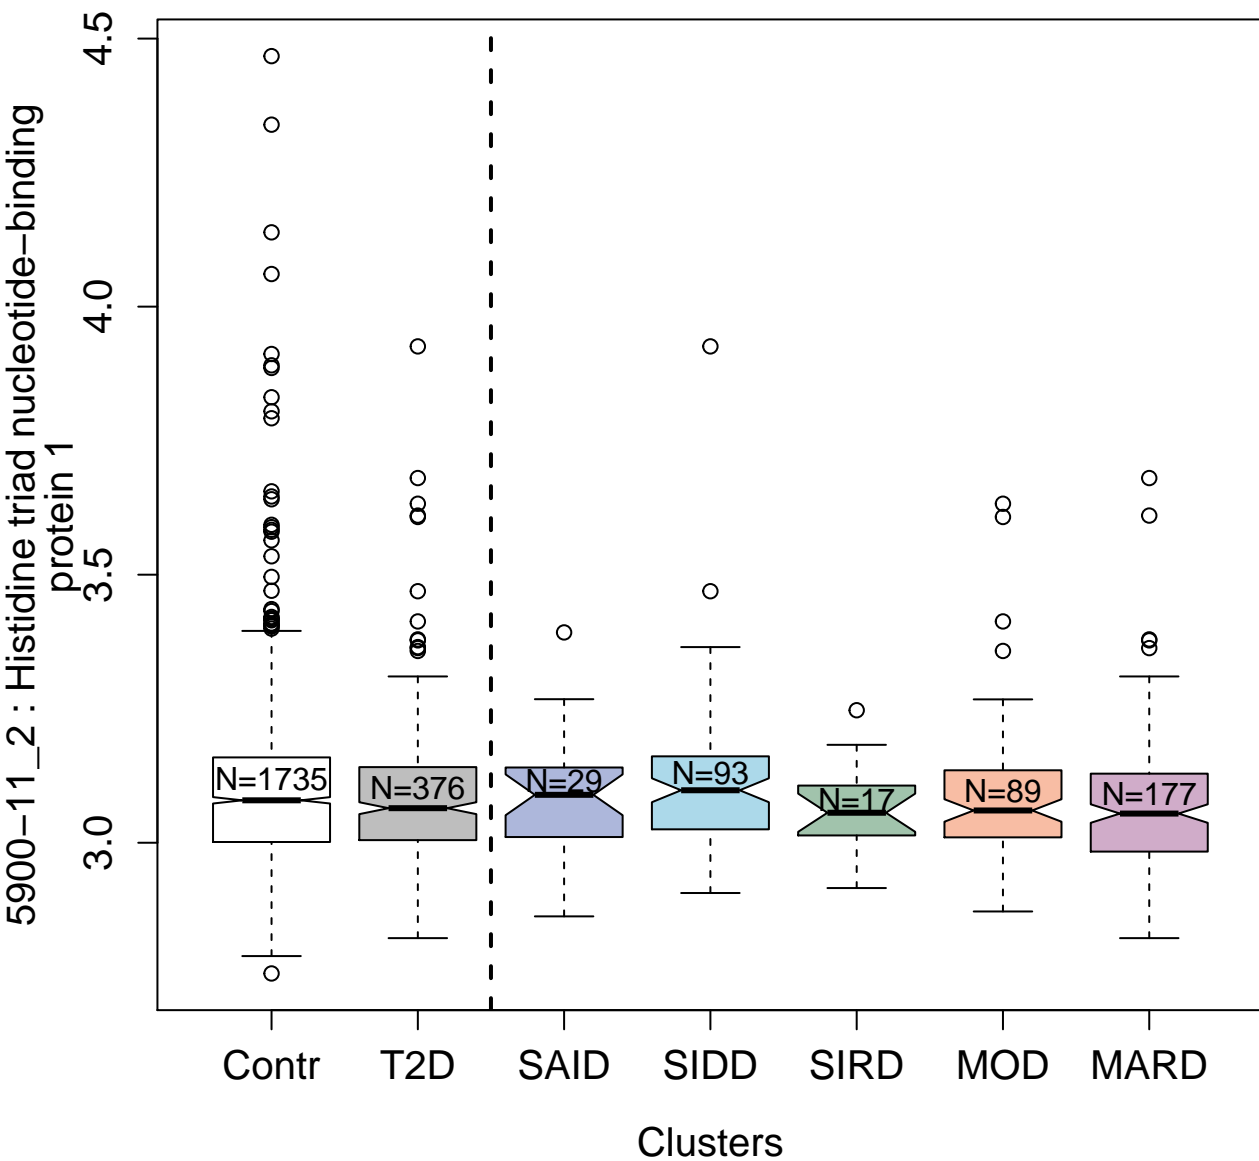

9202-309\_3 : ATP synthase subunit O;  
mitochondrial

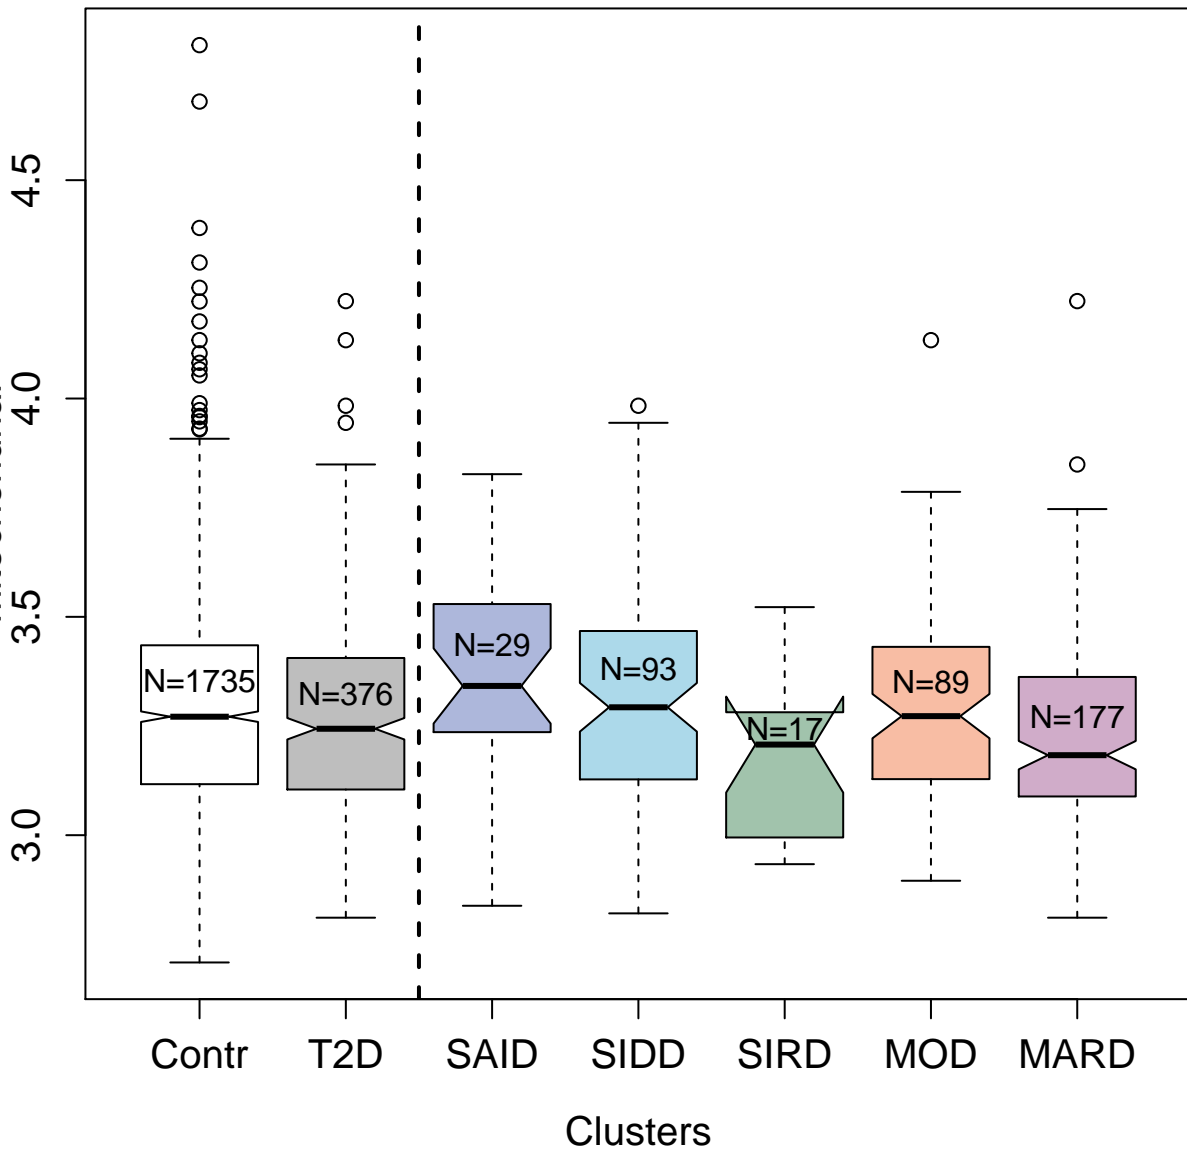

3865-53\_1 : Ribosomal protein S6 kinase alpha-5

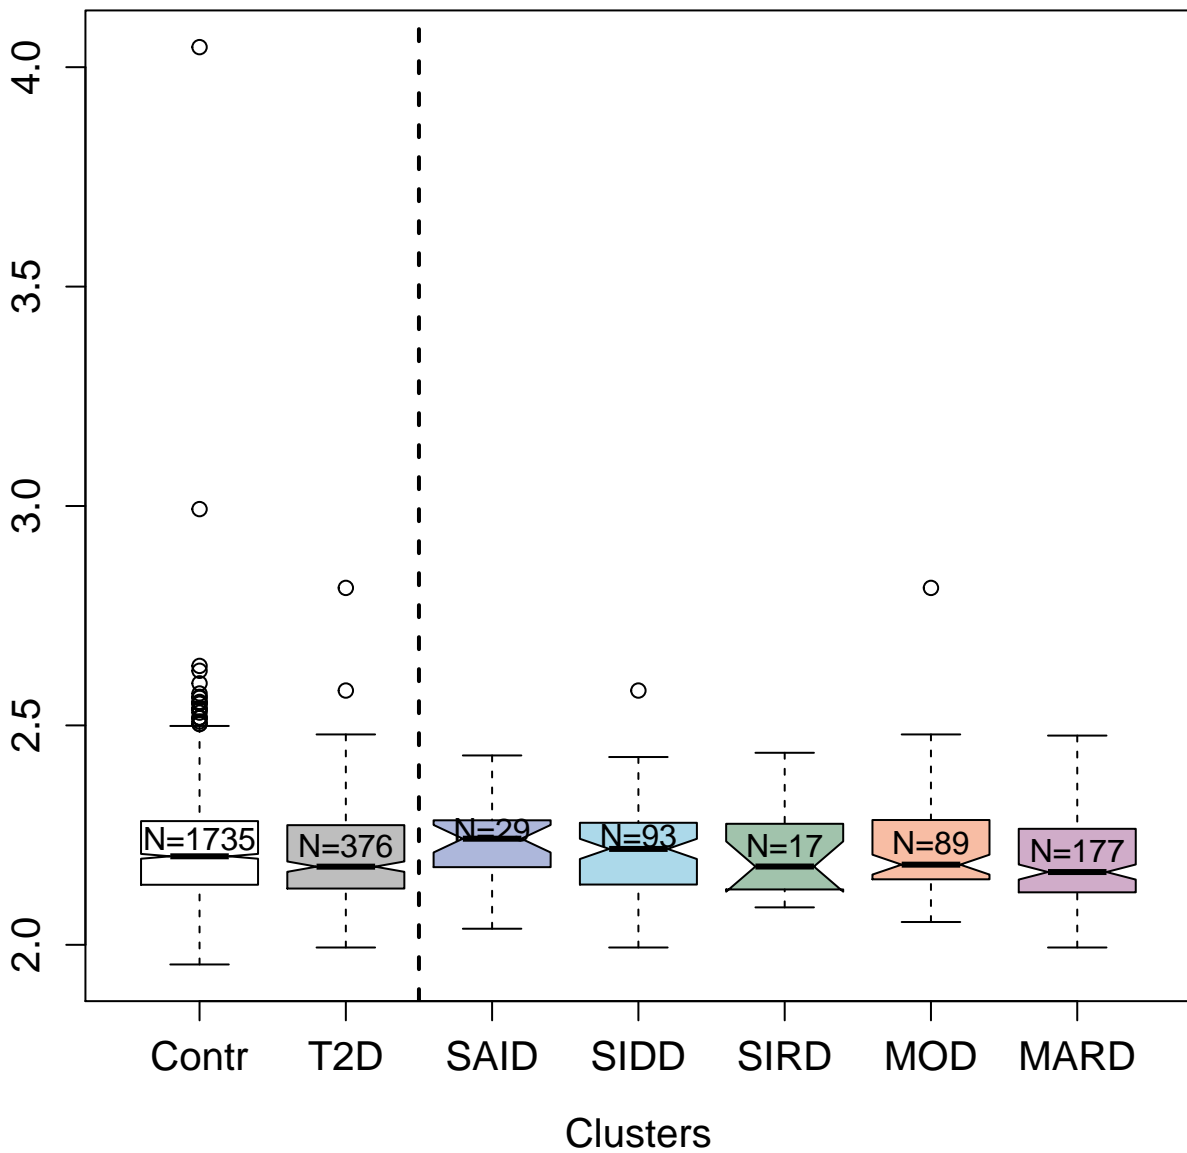



5888-29\_3 : Eukaryotic translation initiation factor 5A-1

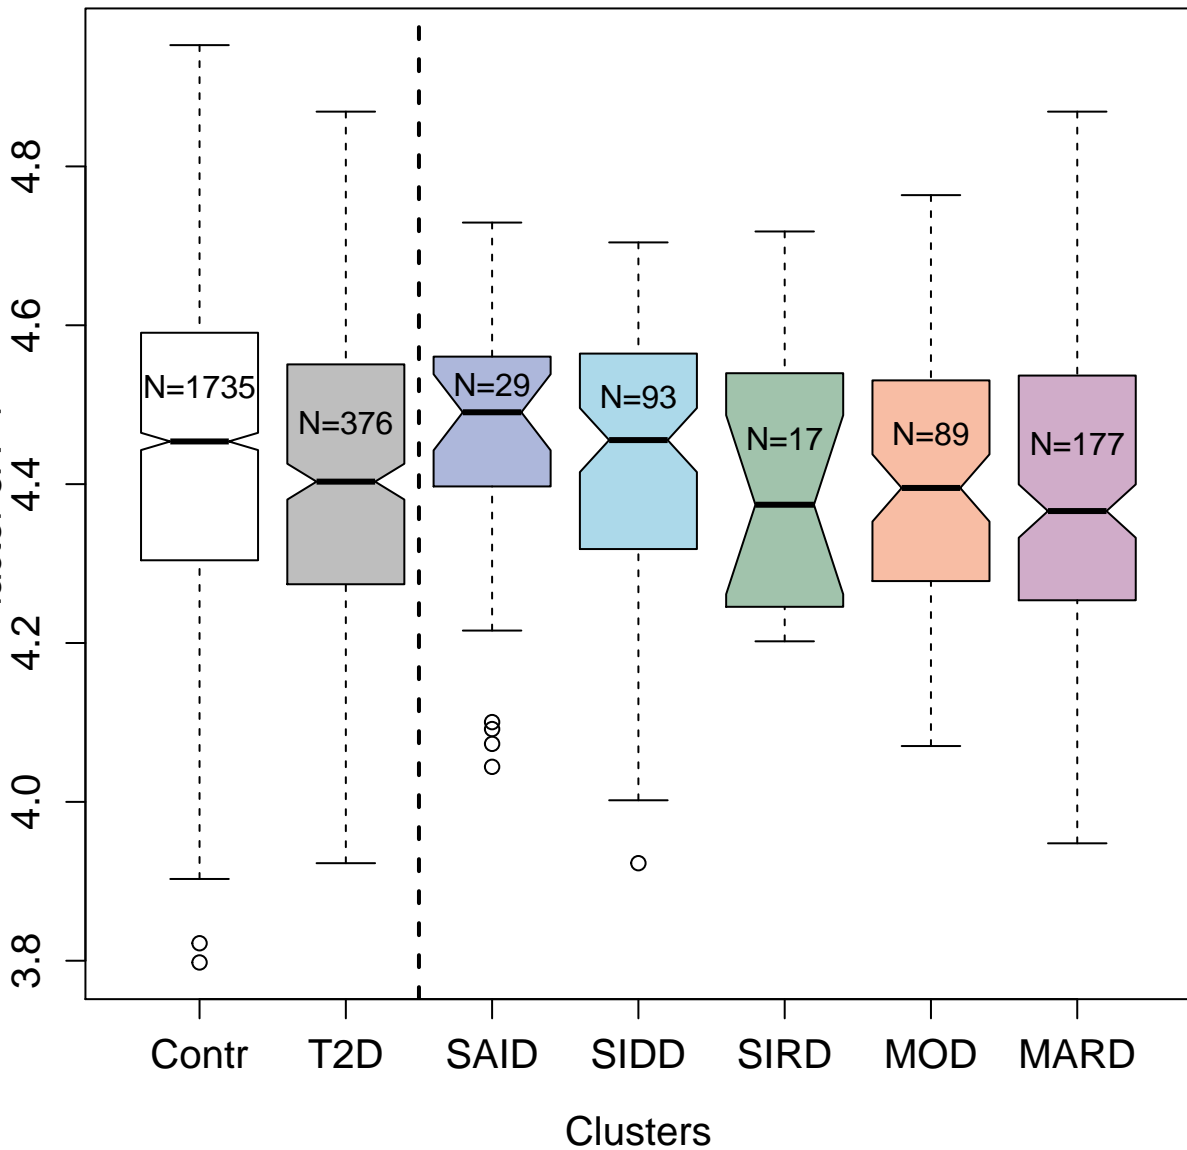

3347-9\_2 : beta-adrenergic receptor kinase 1

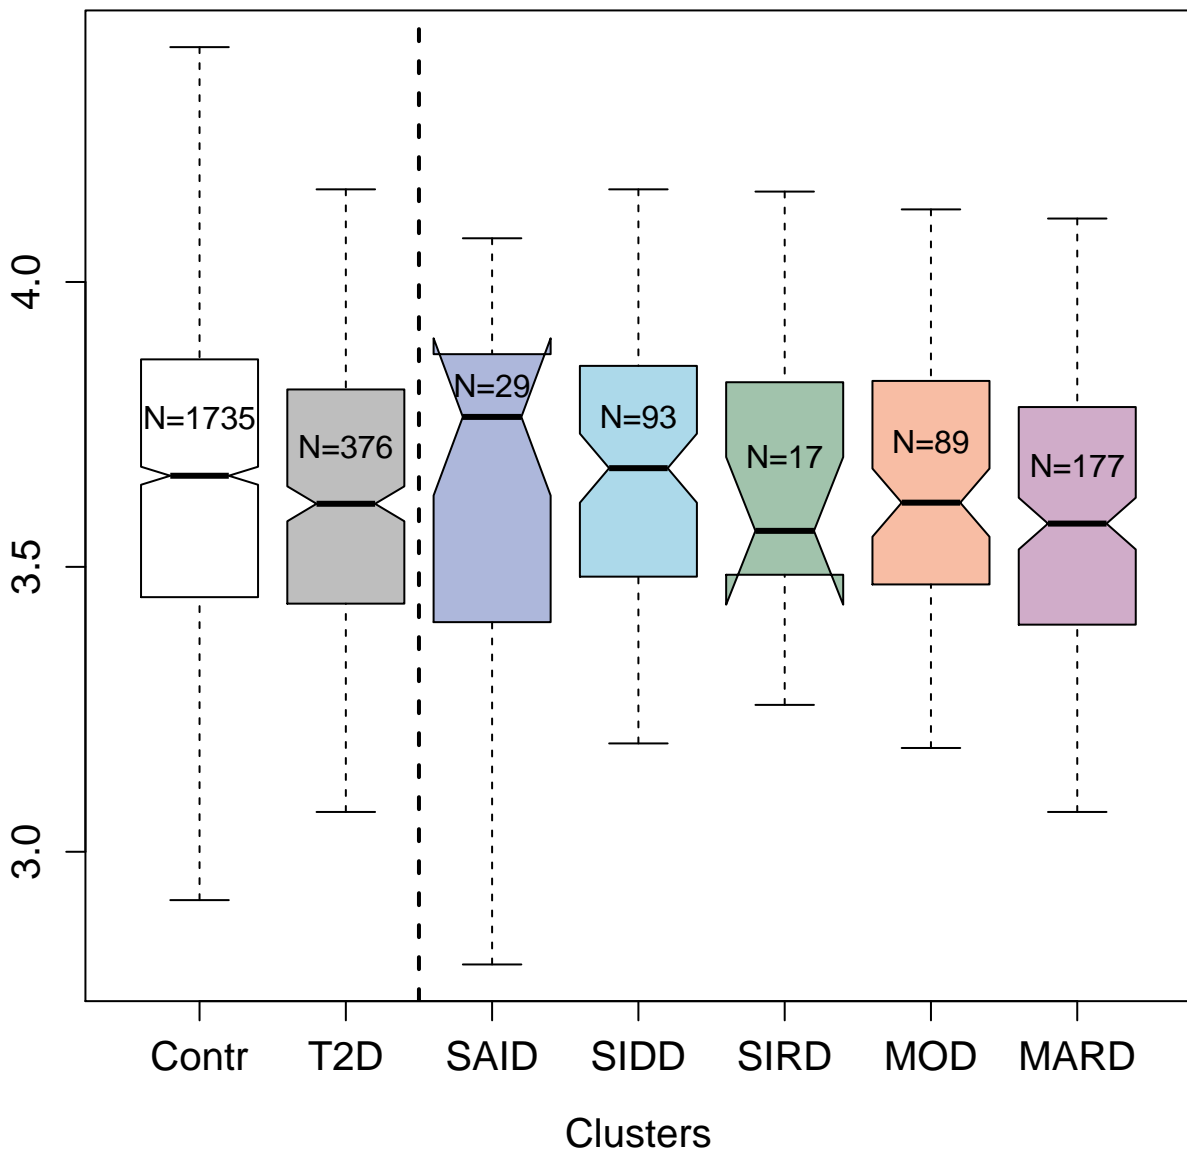

3043-49\_2 : SPARC

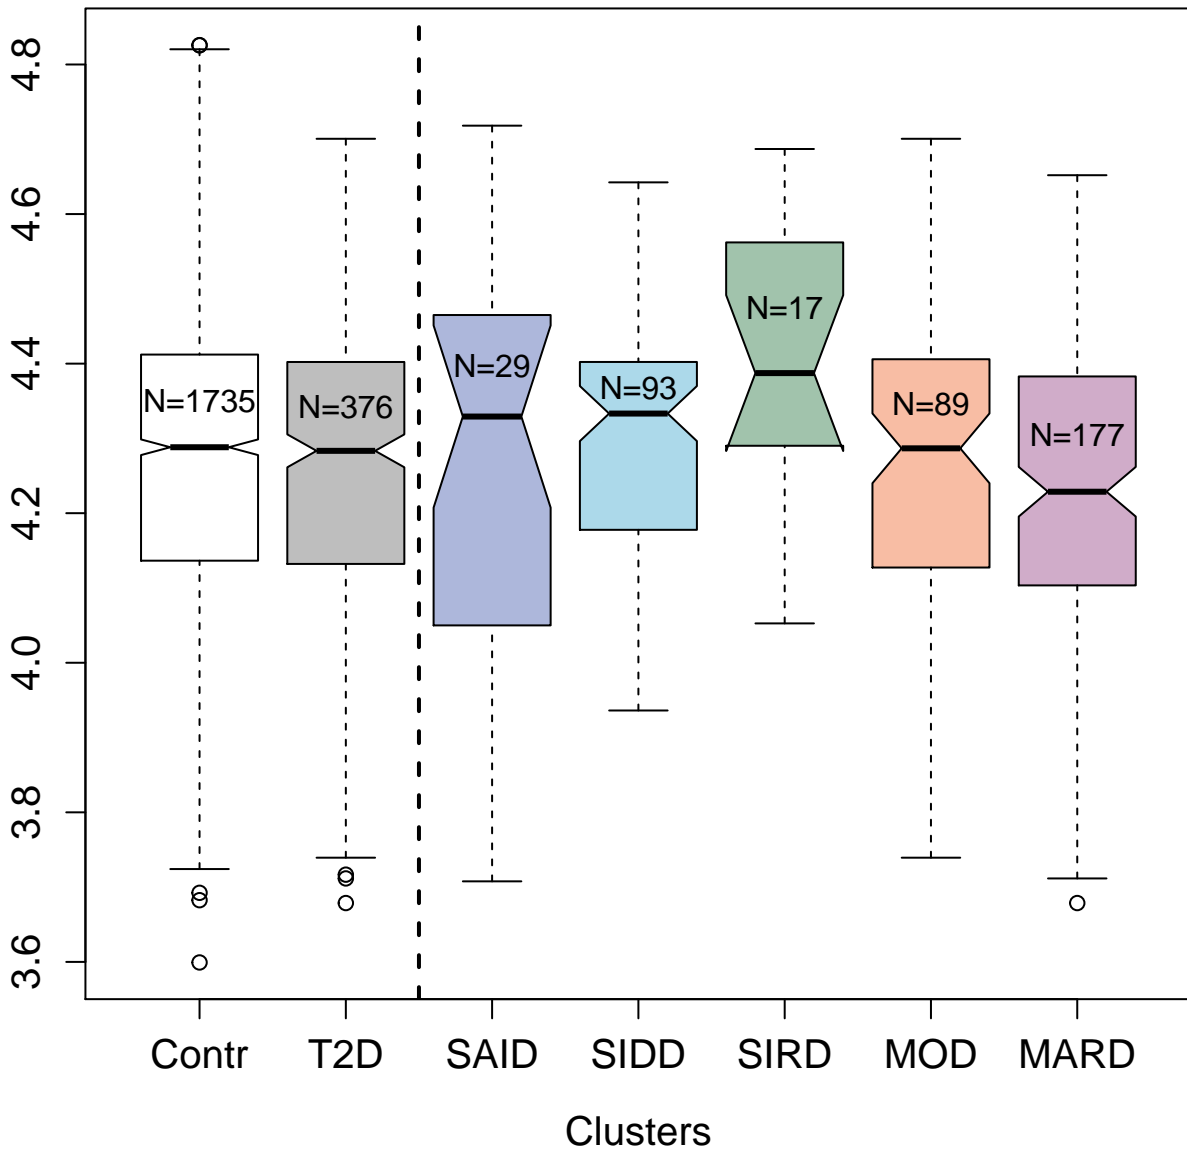

2647-66\_2 : Rab GDP dissociation inhibitor beta

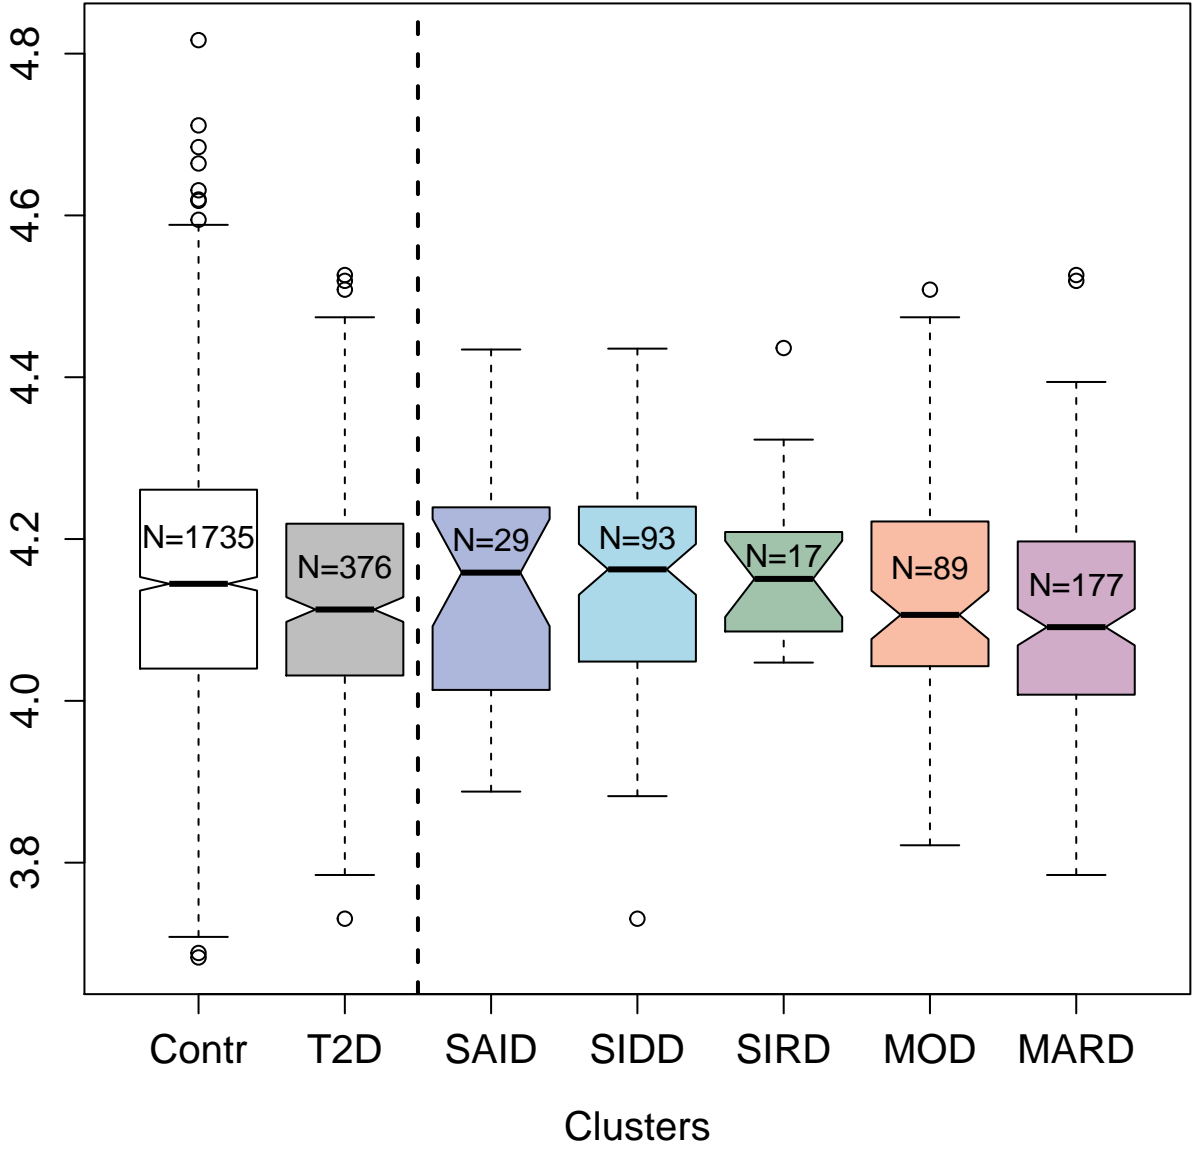

3522-57\_1 : Vasoactive Intestinal Peptide

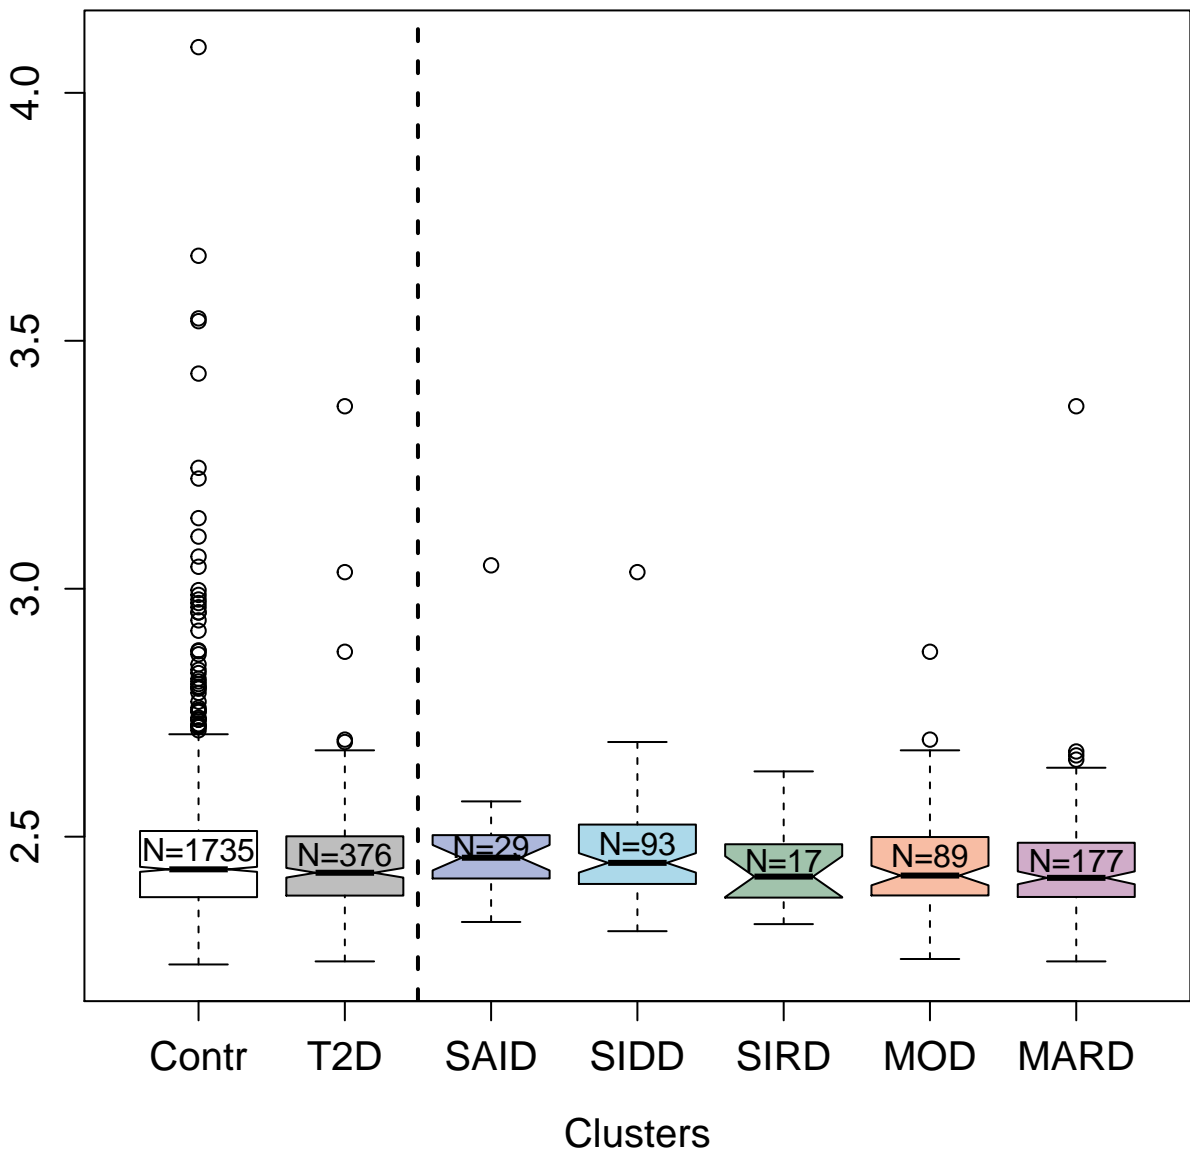

4472-5\_2 : Tropomyosin beta chain

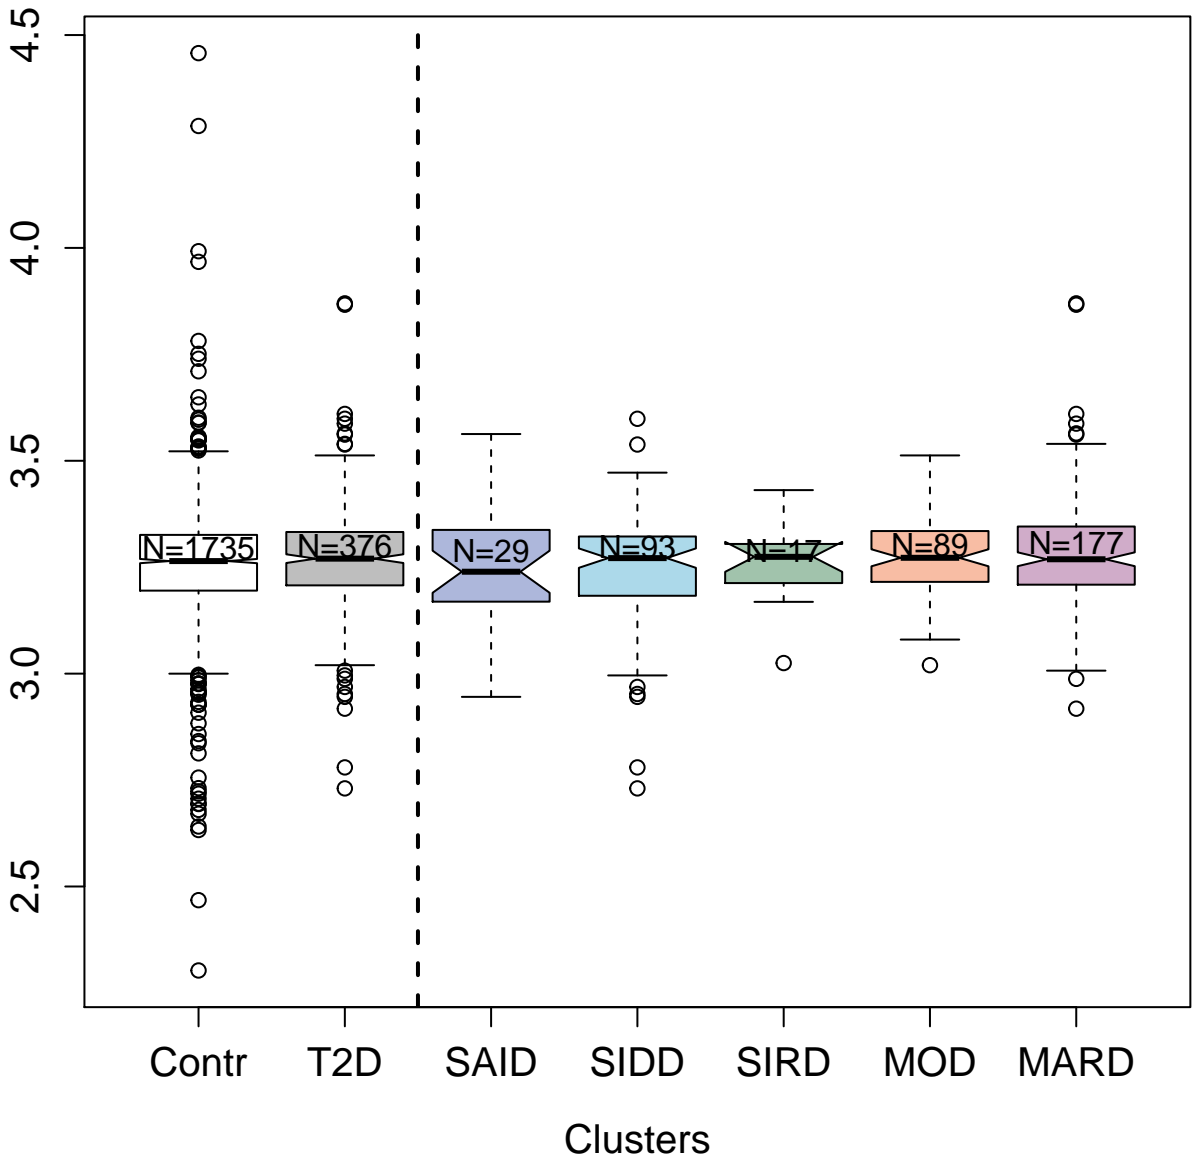

3622-33\_4 : Legumain

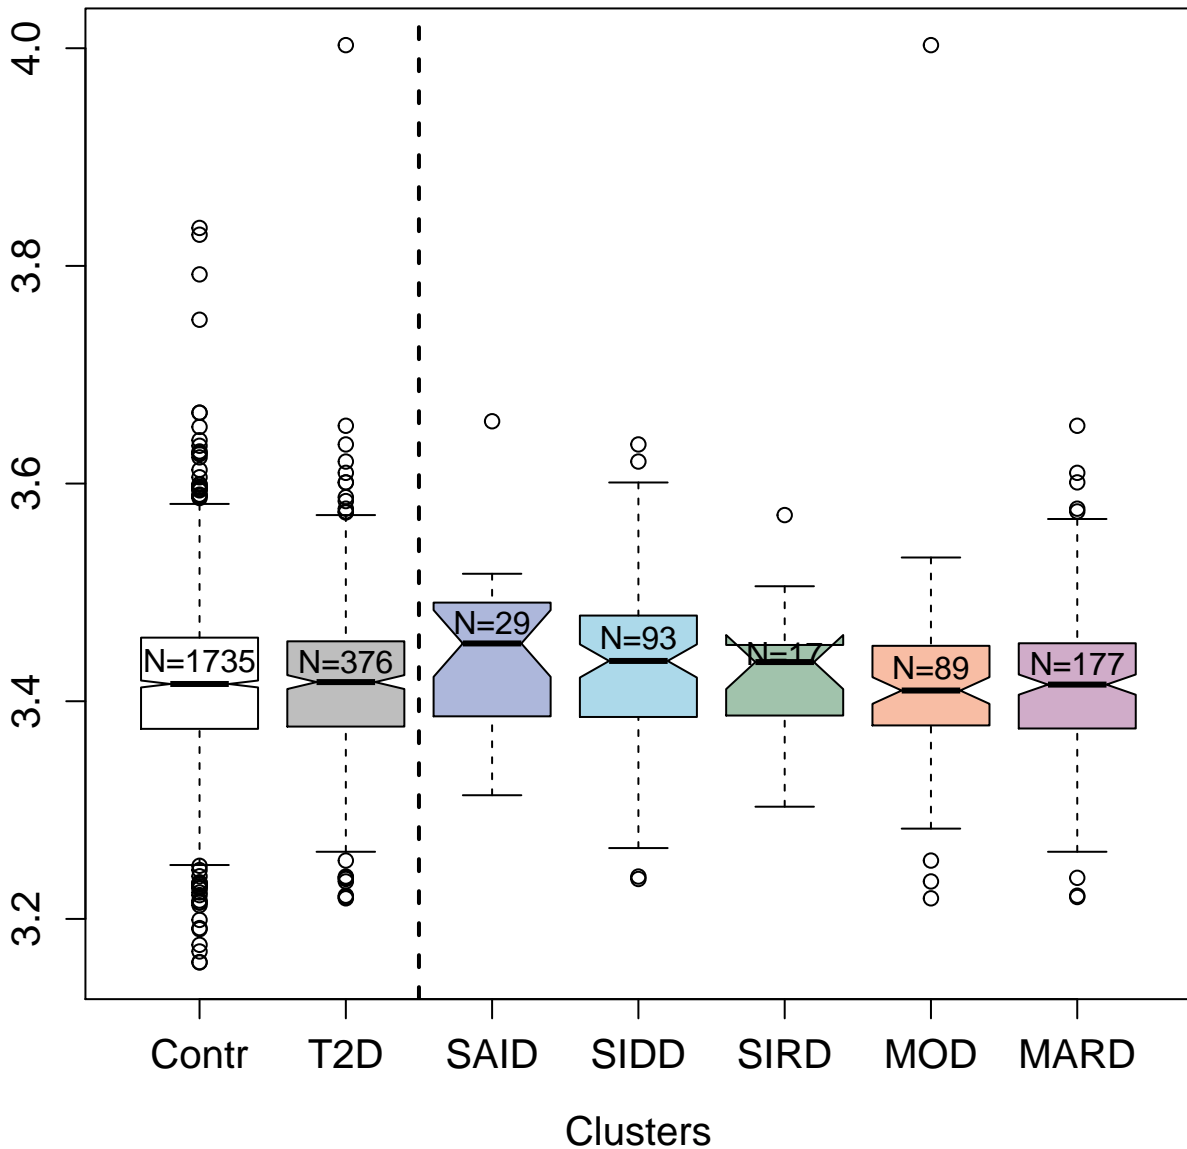

3373-5\_2 : Granzyme H

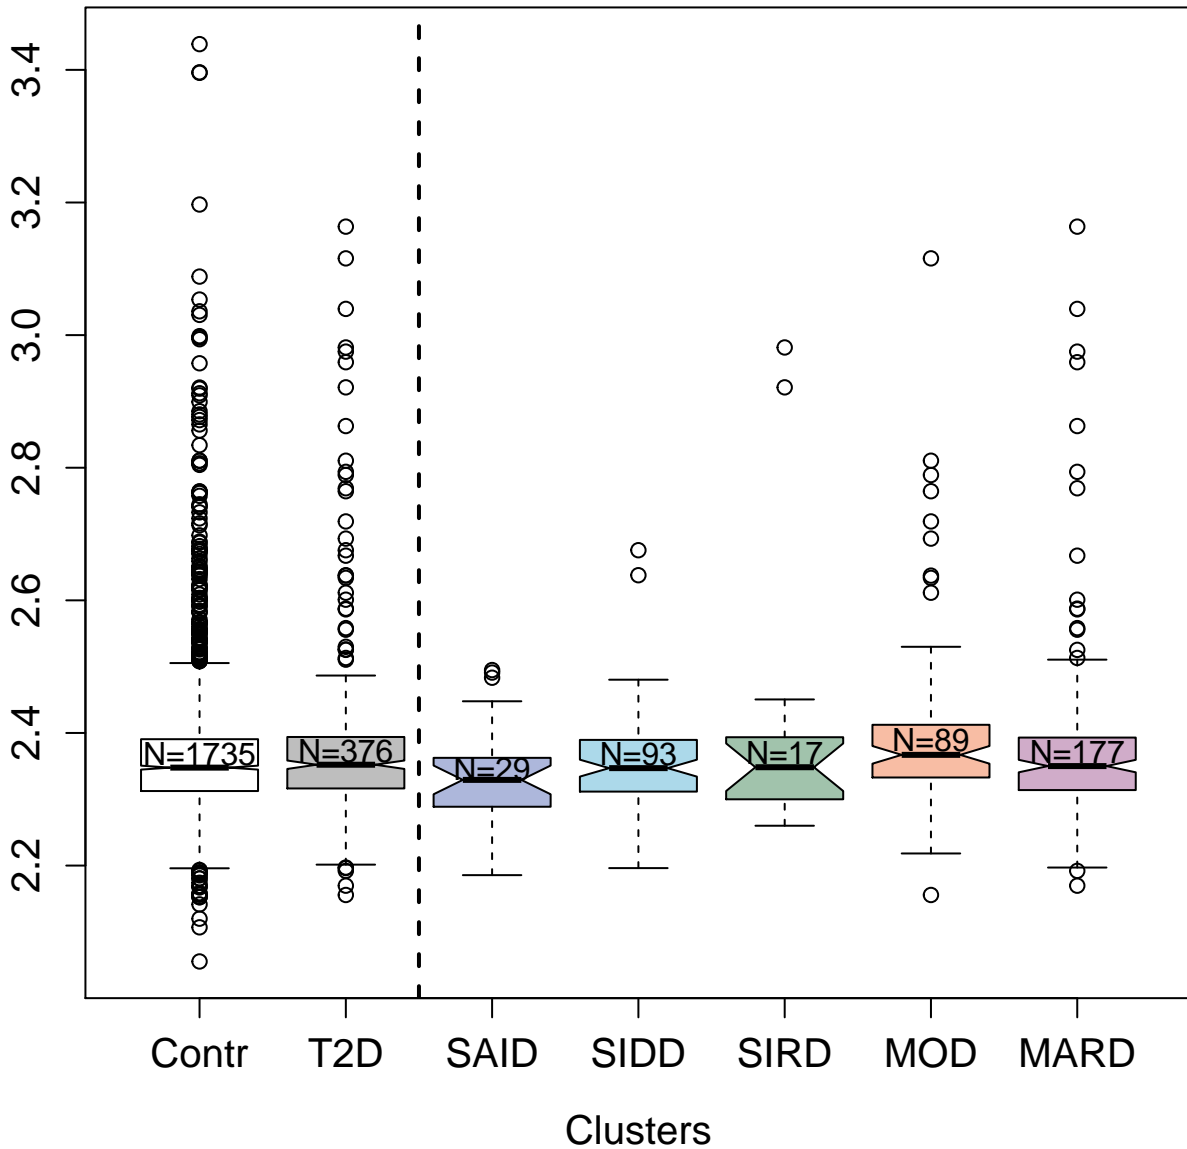



3810-50\_2 : Tyrosine-protein kinase Fgr

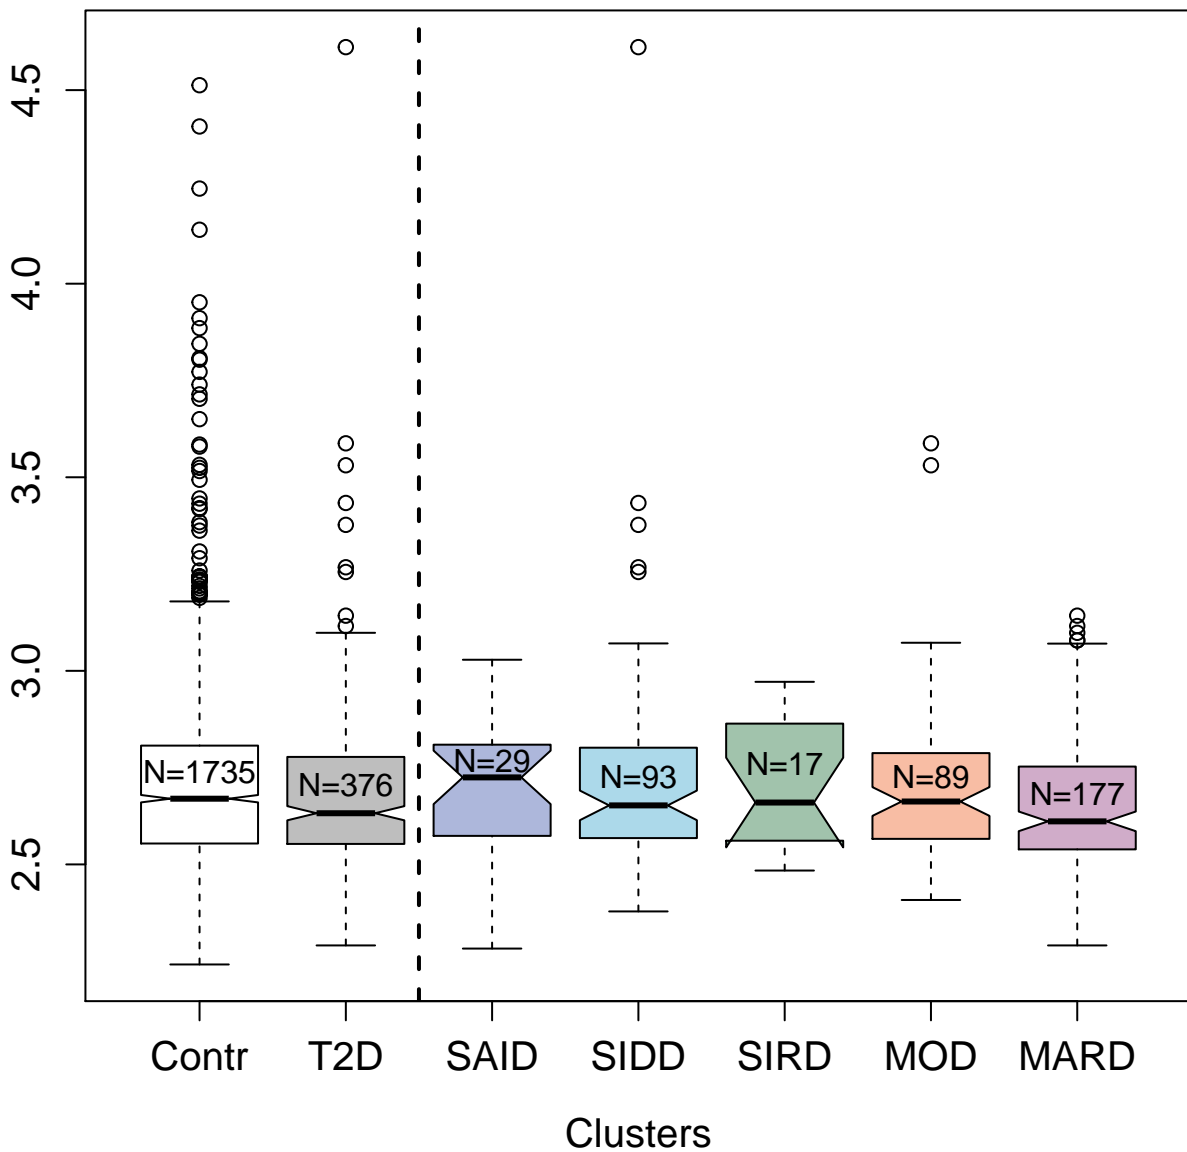

3630-27\_4 : Cell adhesion molecule 3

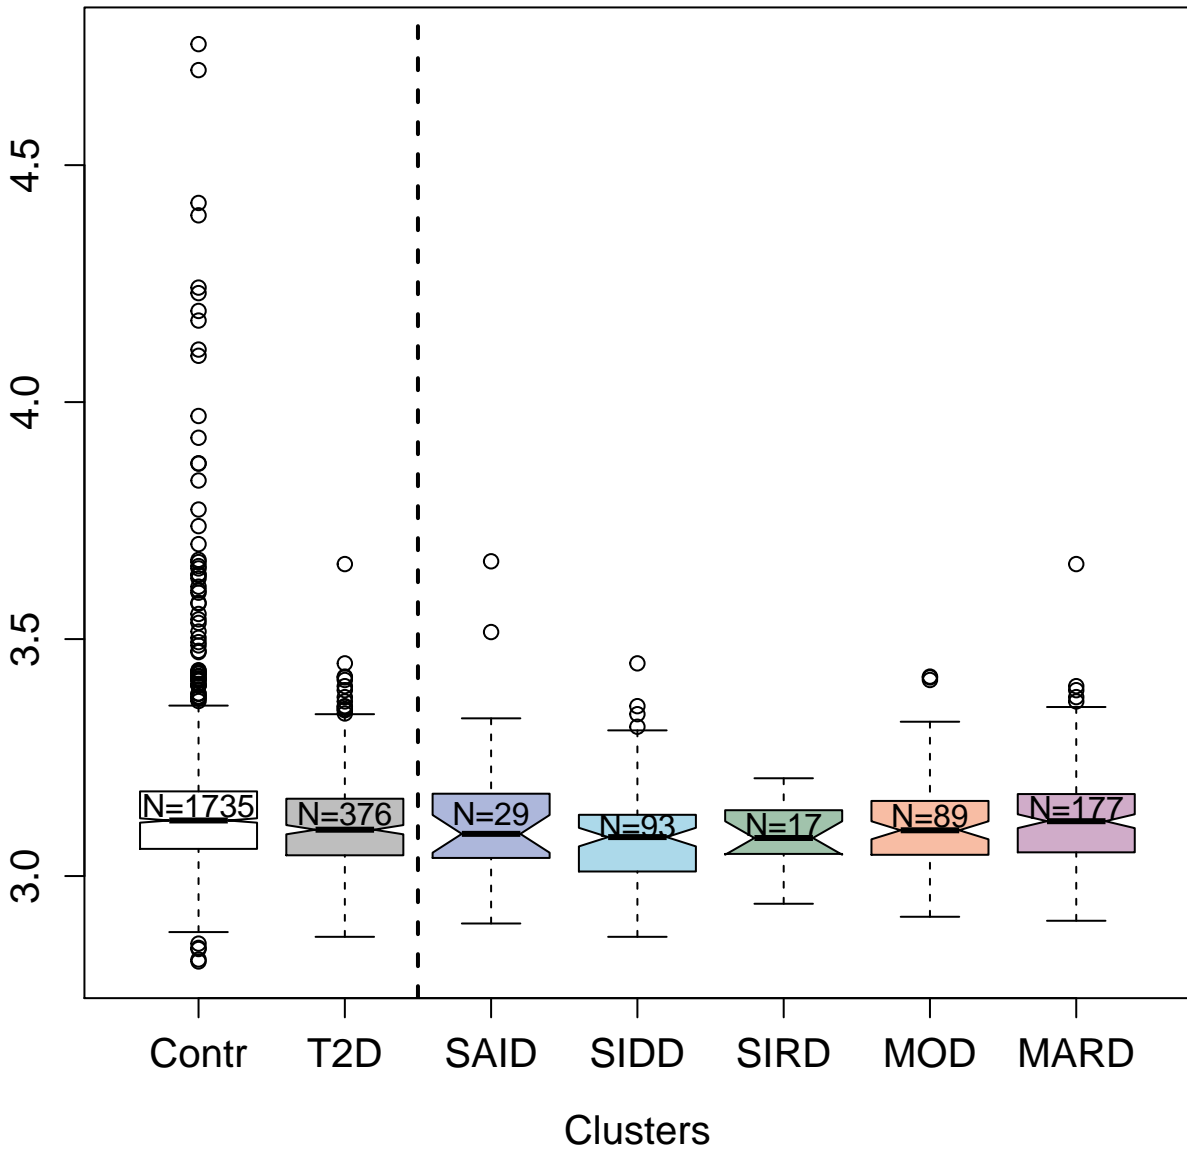

3738-54\_1 : Macrophage colony-stimulating factor

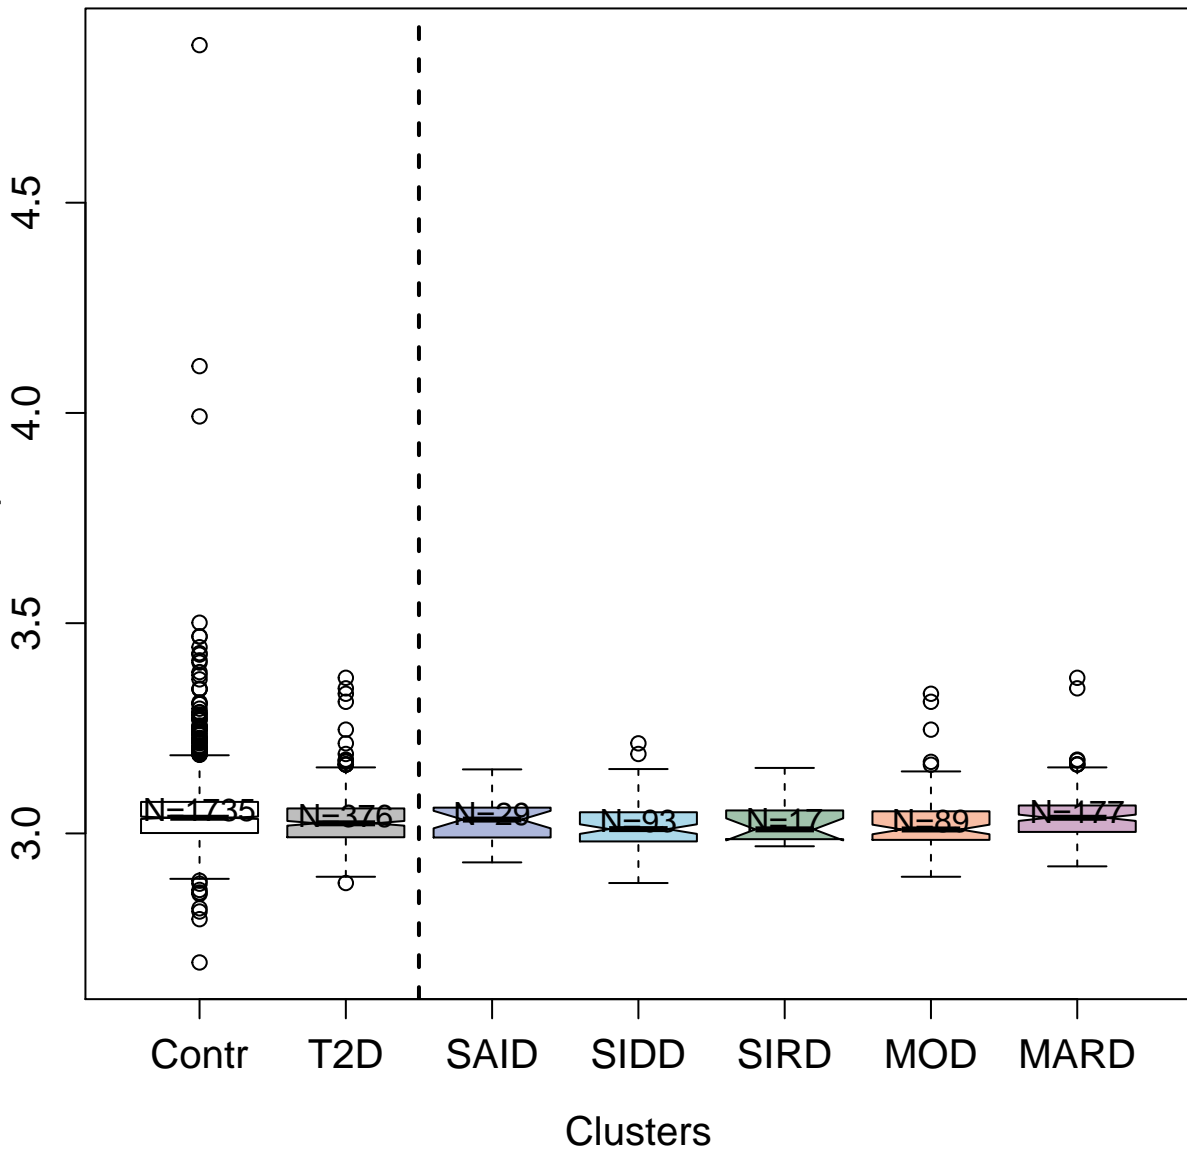

2682-68\_1 : 60 kDa heat shock protein;  
mitochondrial

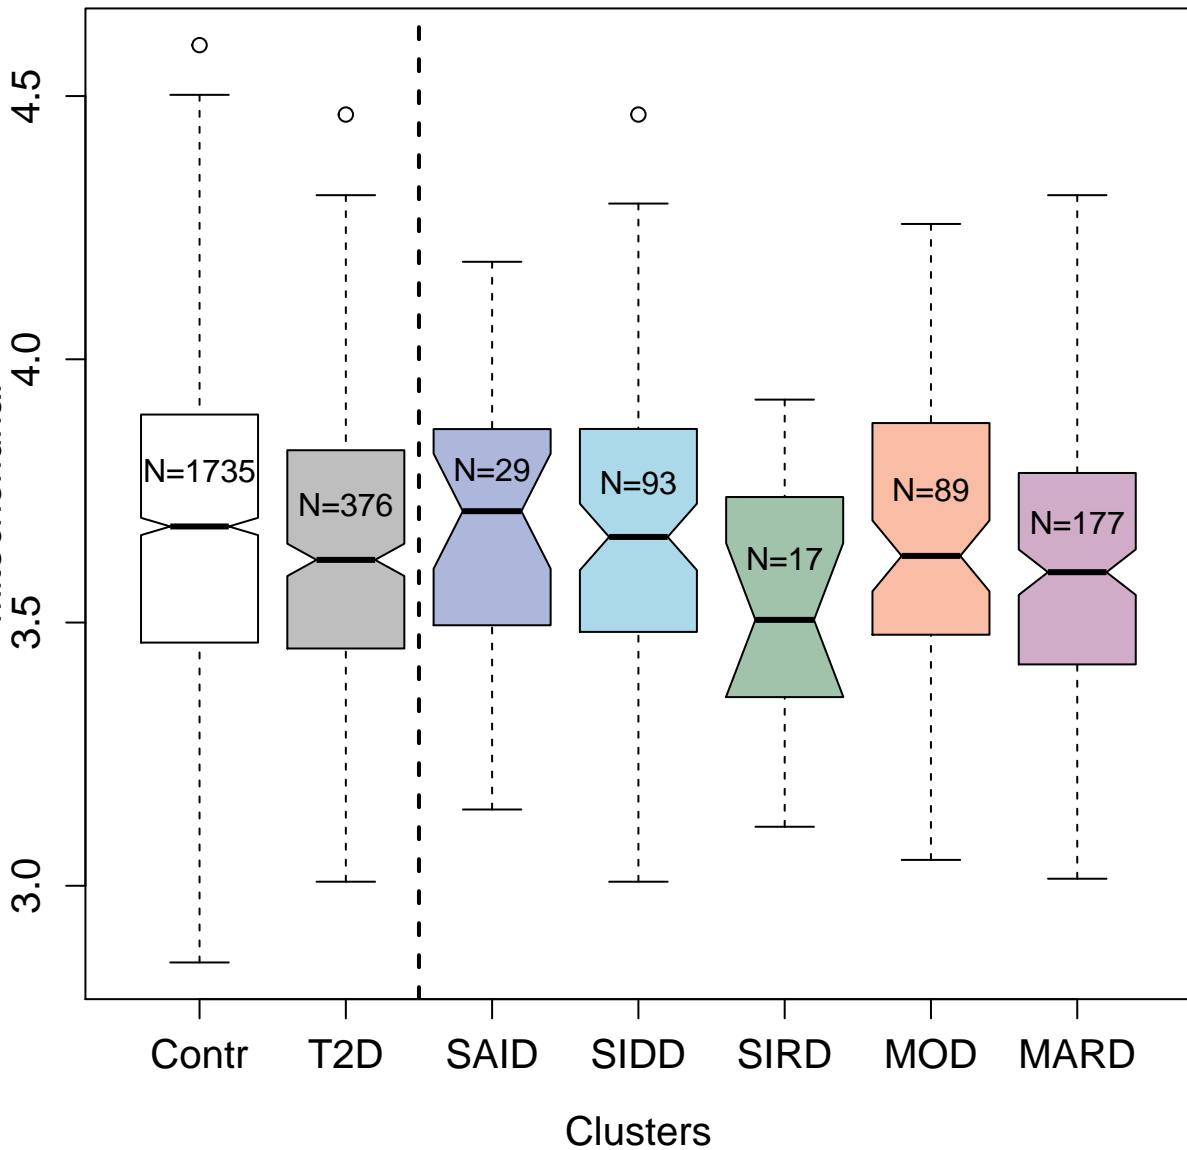

5463-22\_3 : Growth arrest-specific protein 1

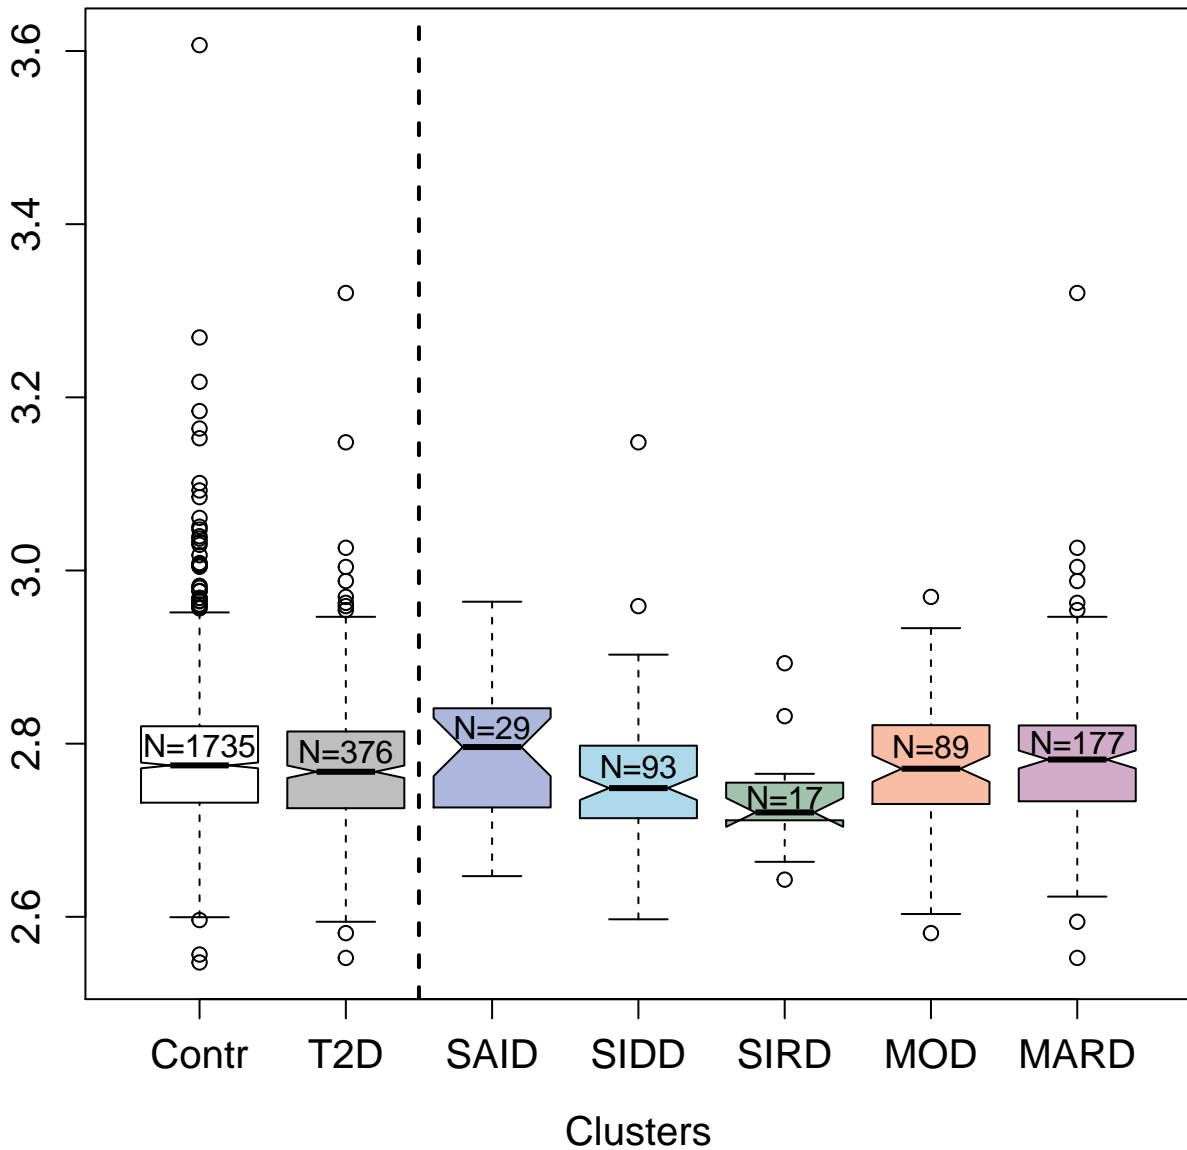

5798-3\_3 : BH3-interacting domain death agonist

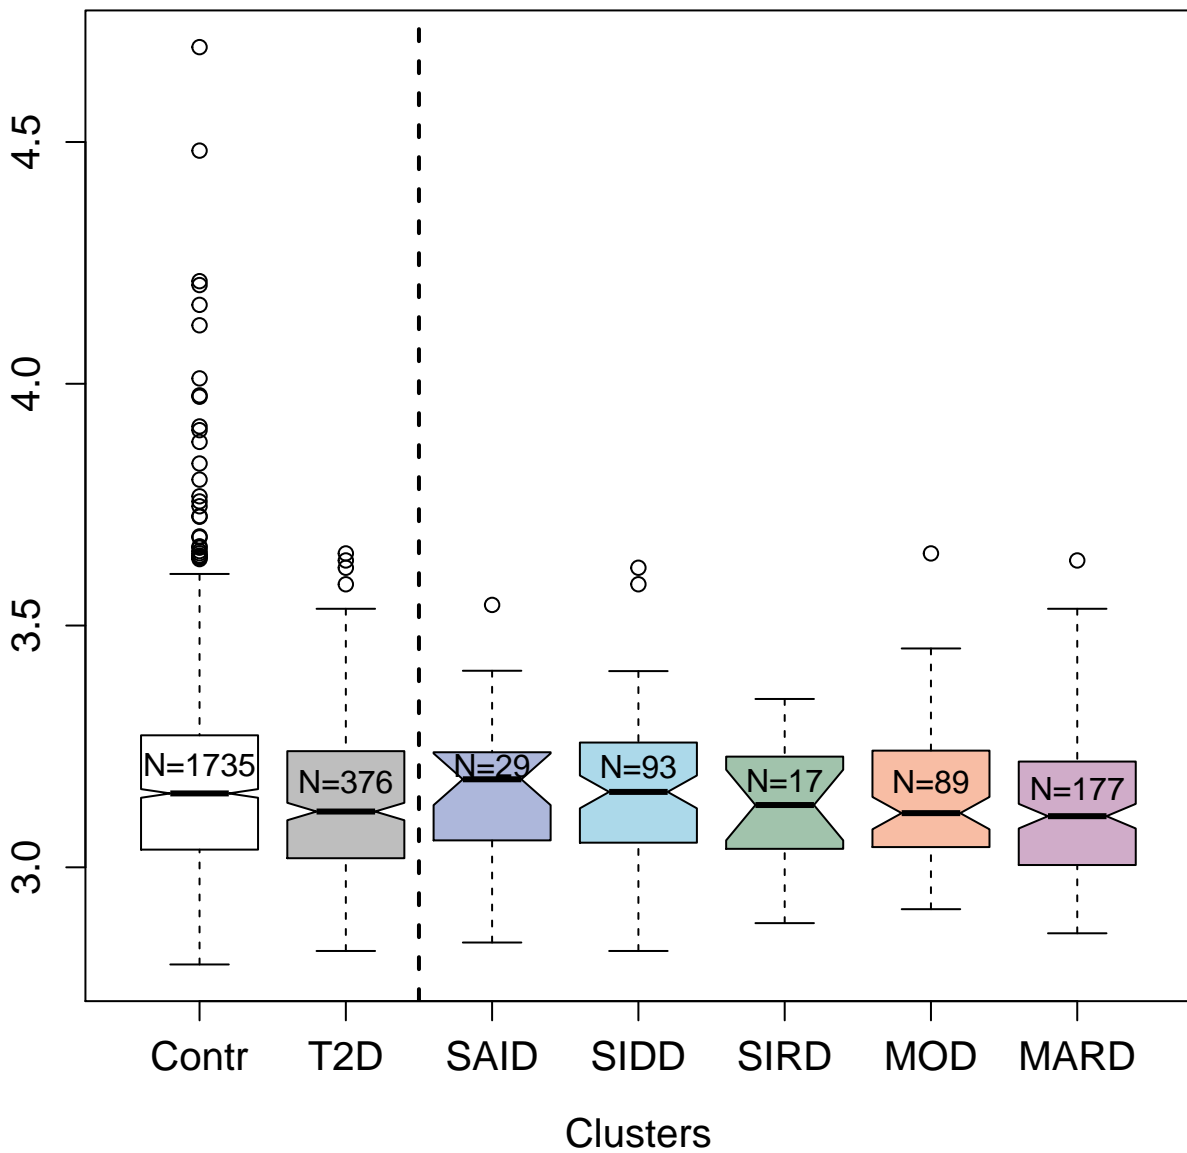

5248-68\_2 : Peptidyl-prolyl cis-trans isomerase F; mitochondrial

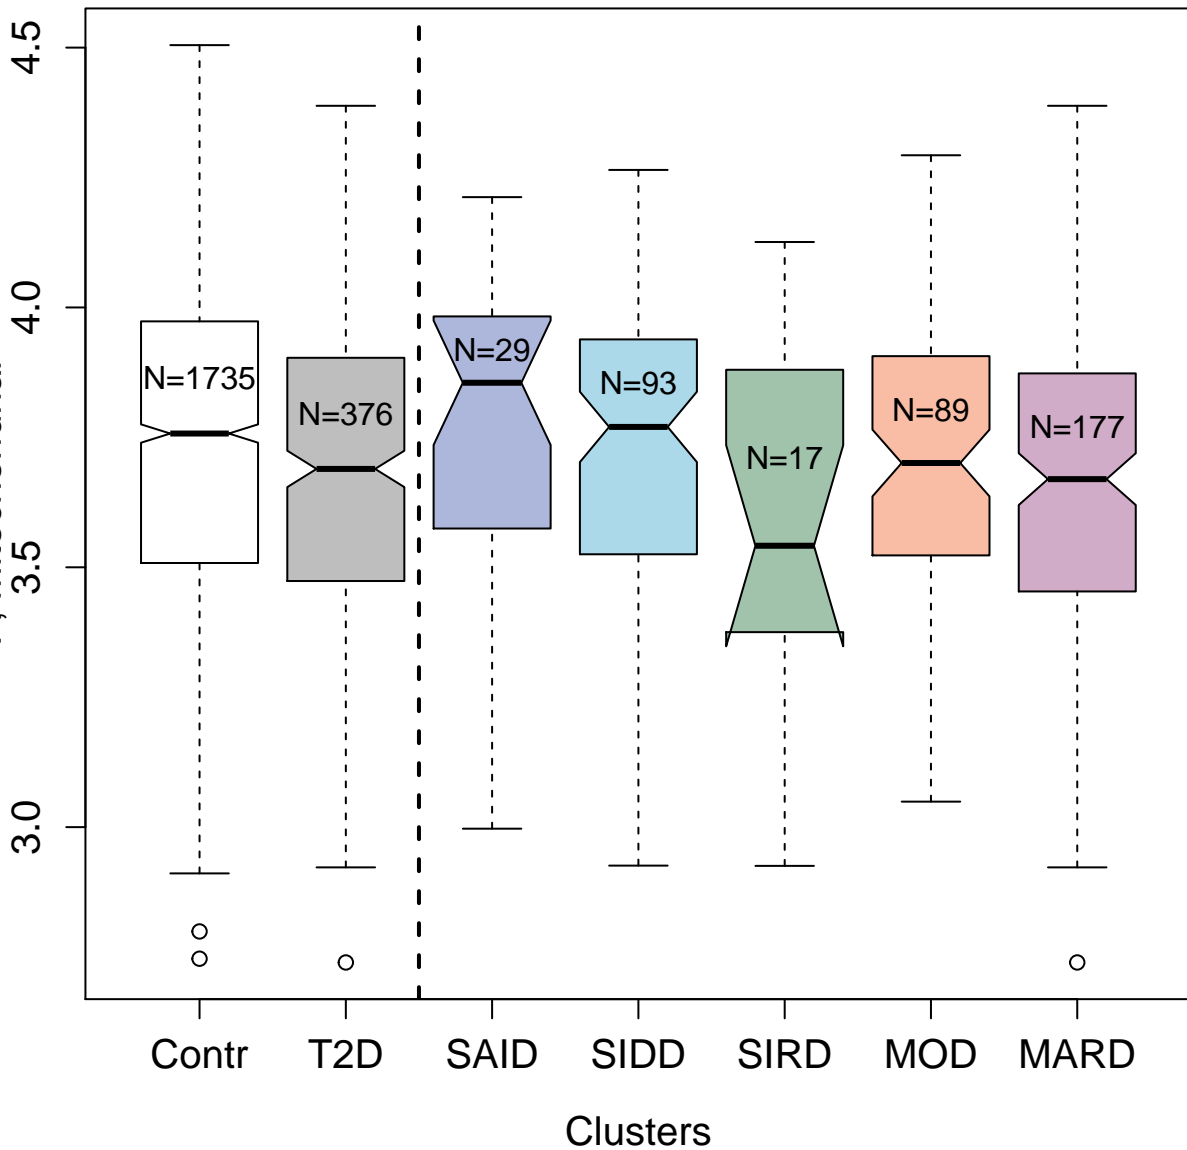

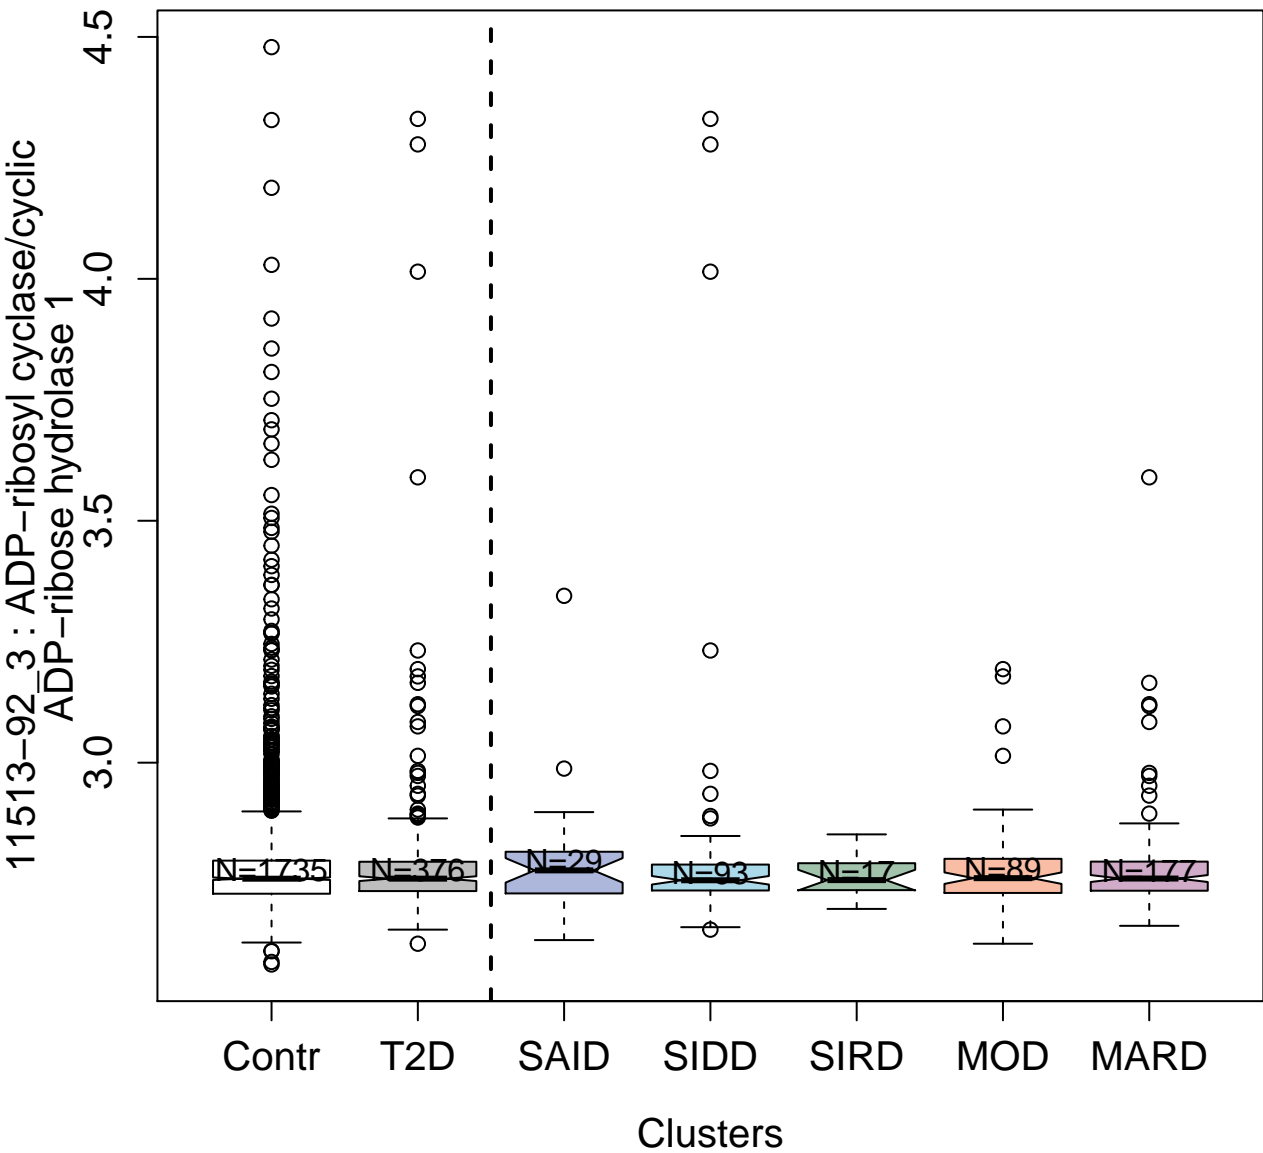



5351-52\_3 : Heterogeneous nuclear  
ribonucleoproteins A2/B1

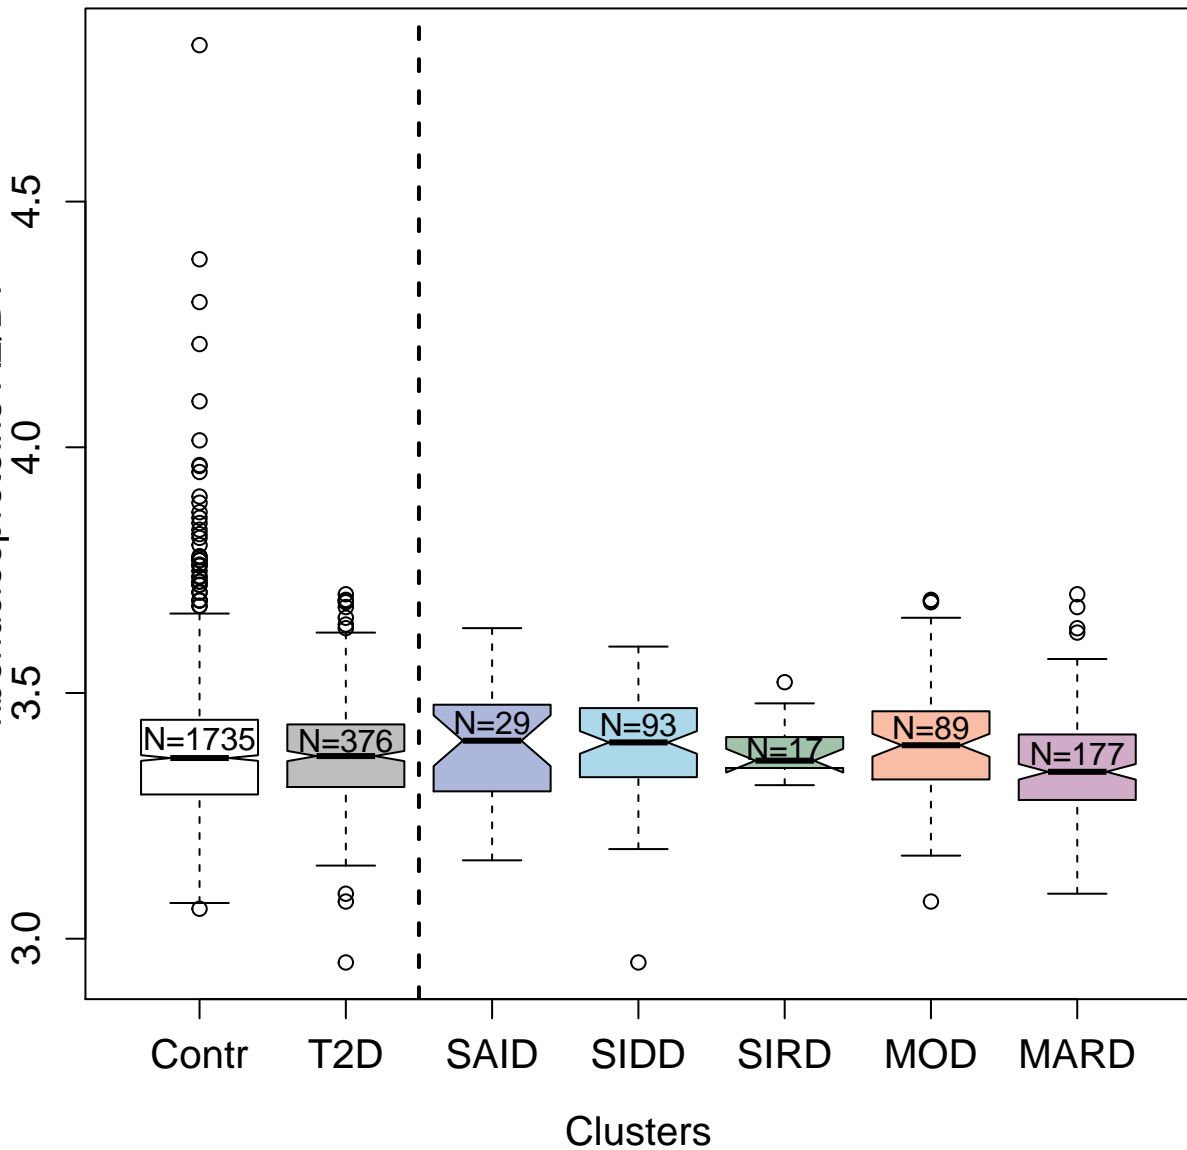

3535-84\_1 : Dickkopf-related protein 1

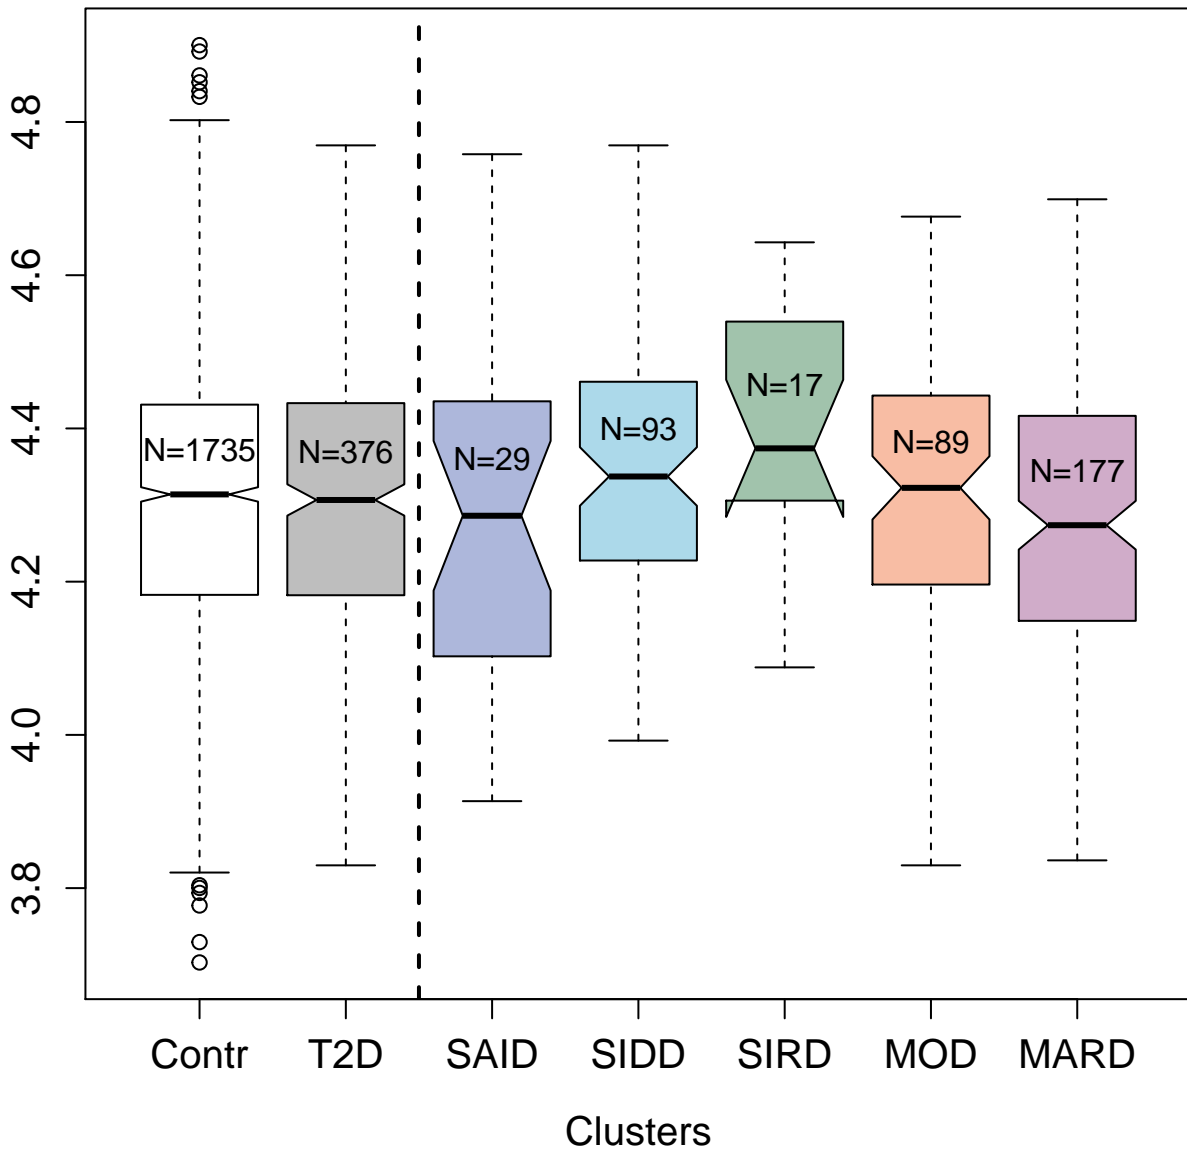

4811-33\_3 : Inter-alpha-trypsin inhibitor heavy chain H4

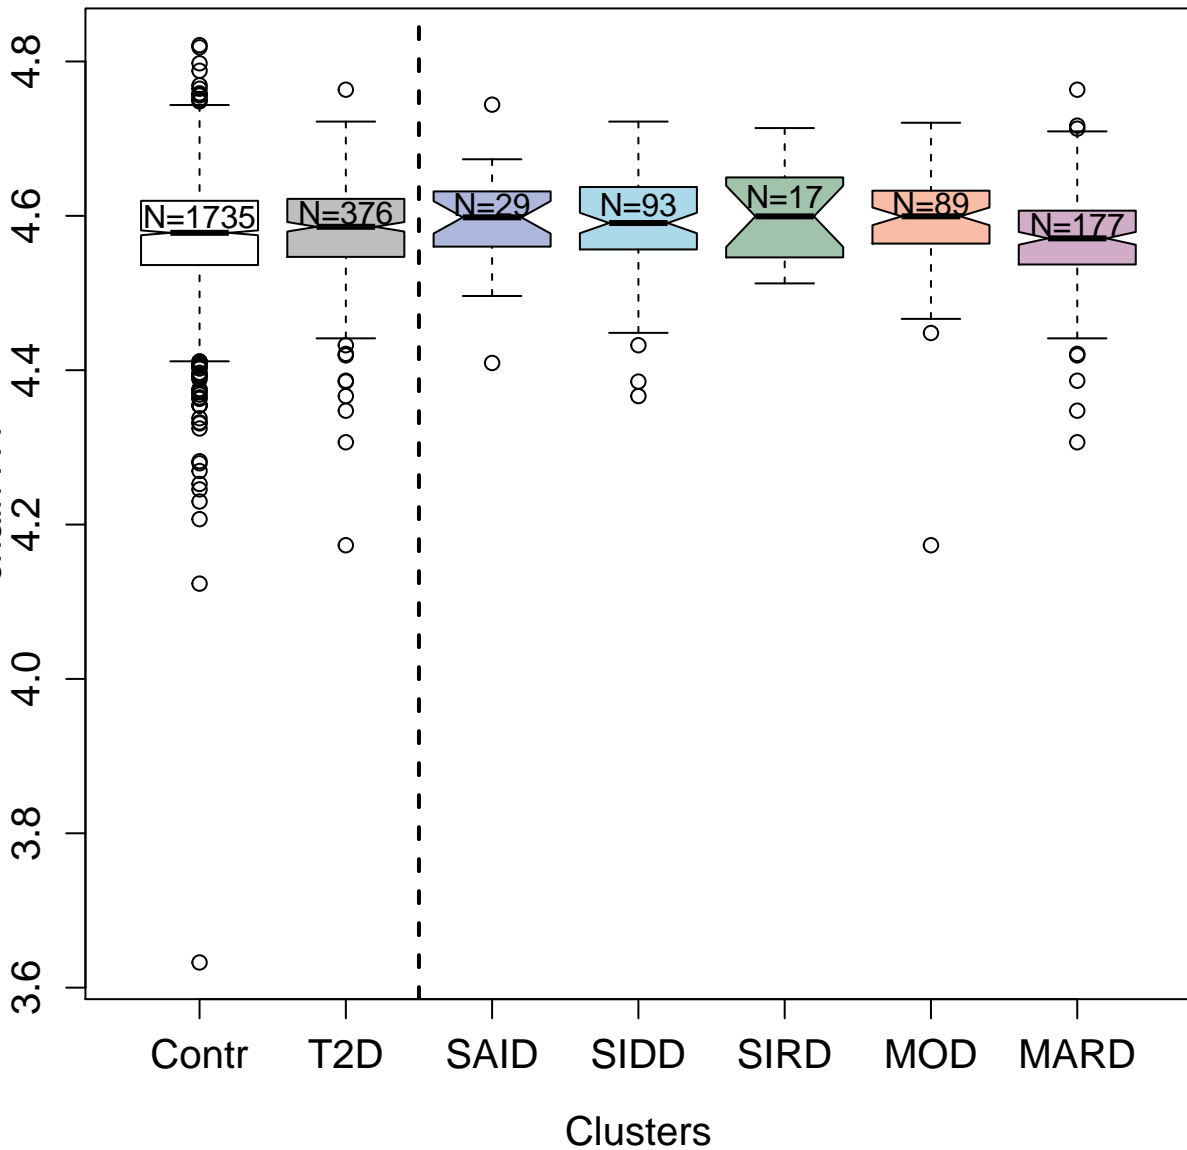

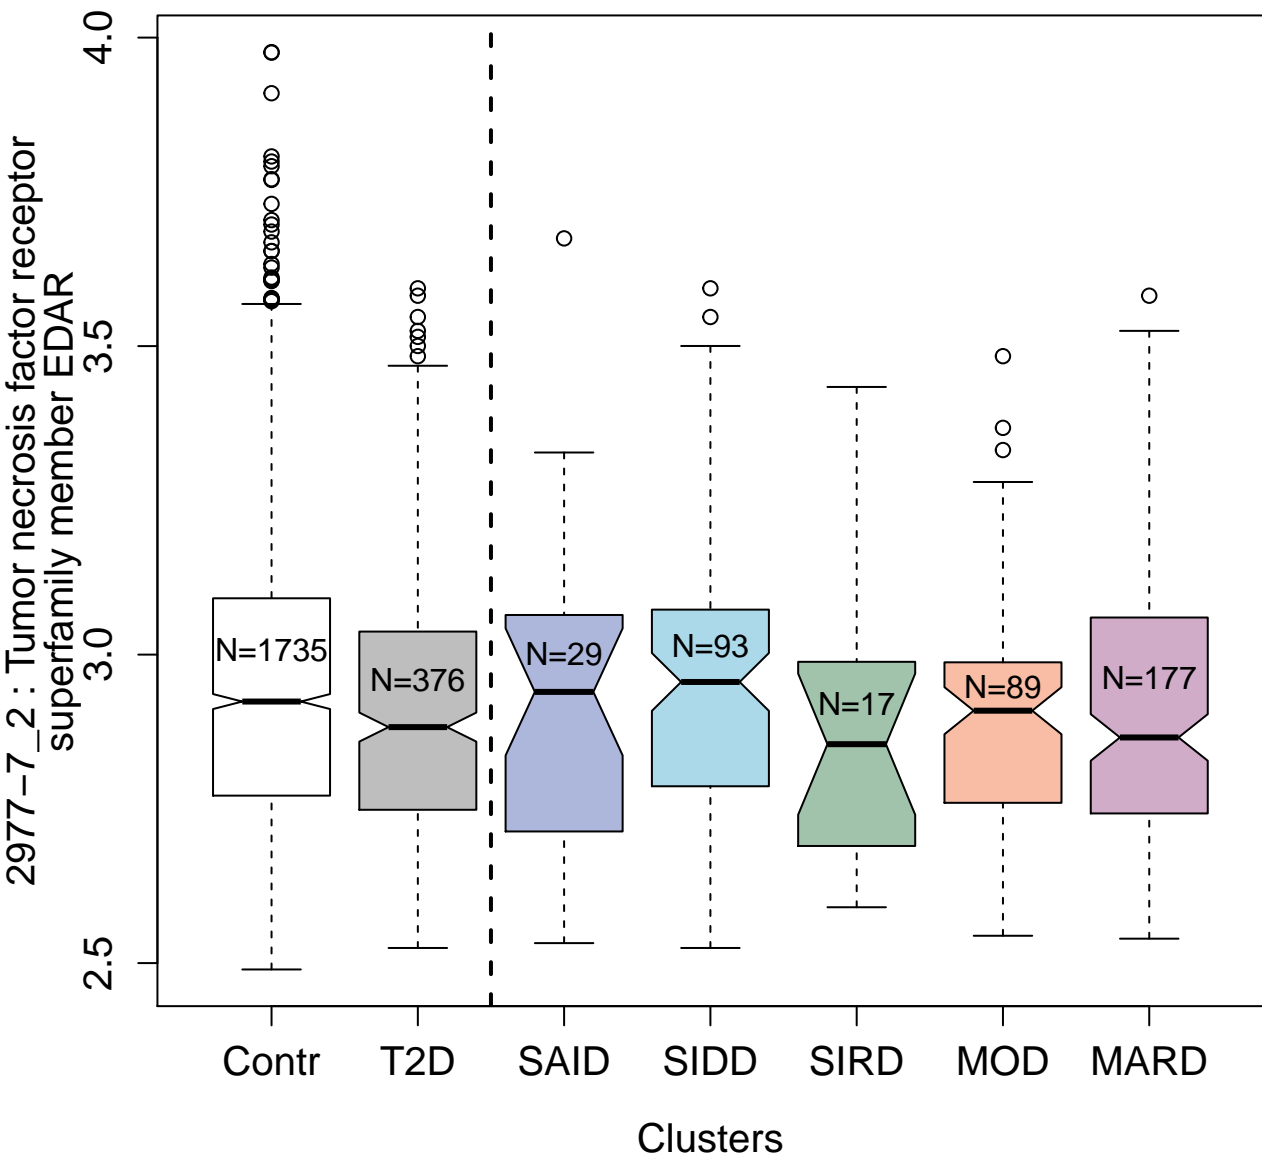

3351-1\_1 : Calcium/calmodulin-dependent protein kinase type II subunit beta

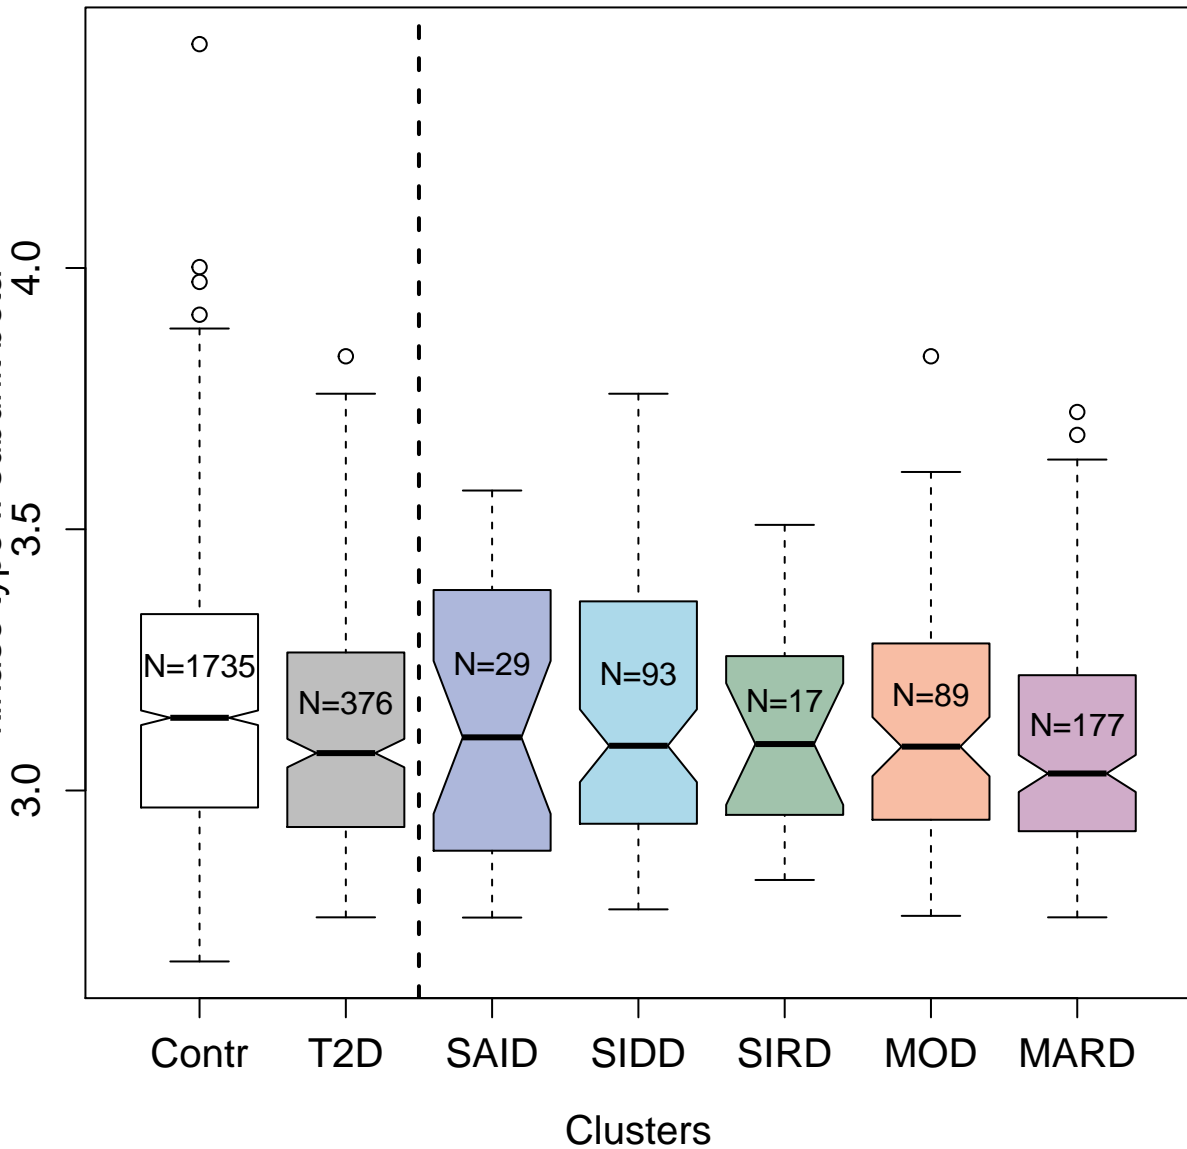

4217-49\_3 : 3-hydroxyacyl-CoA dehydrogenase

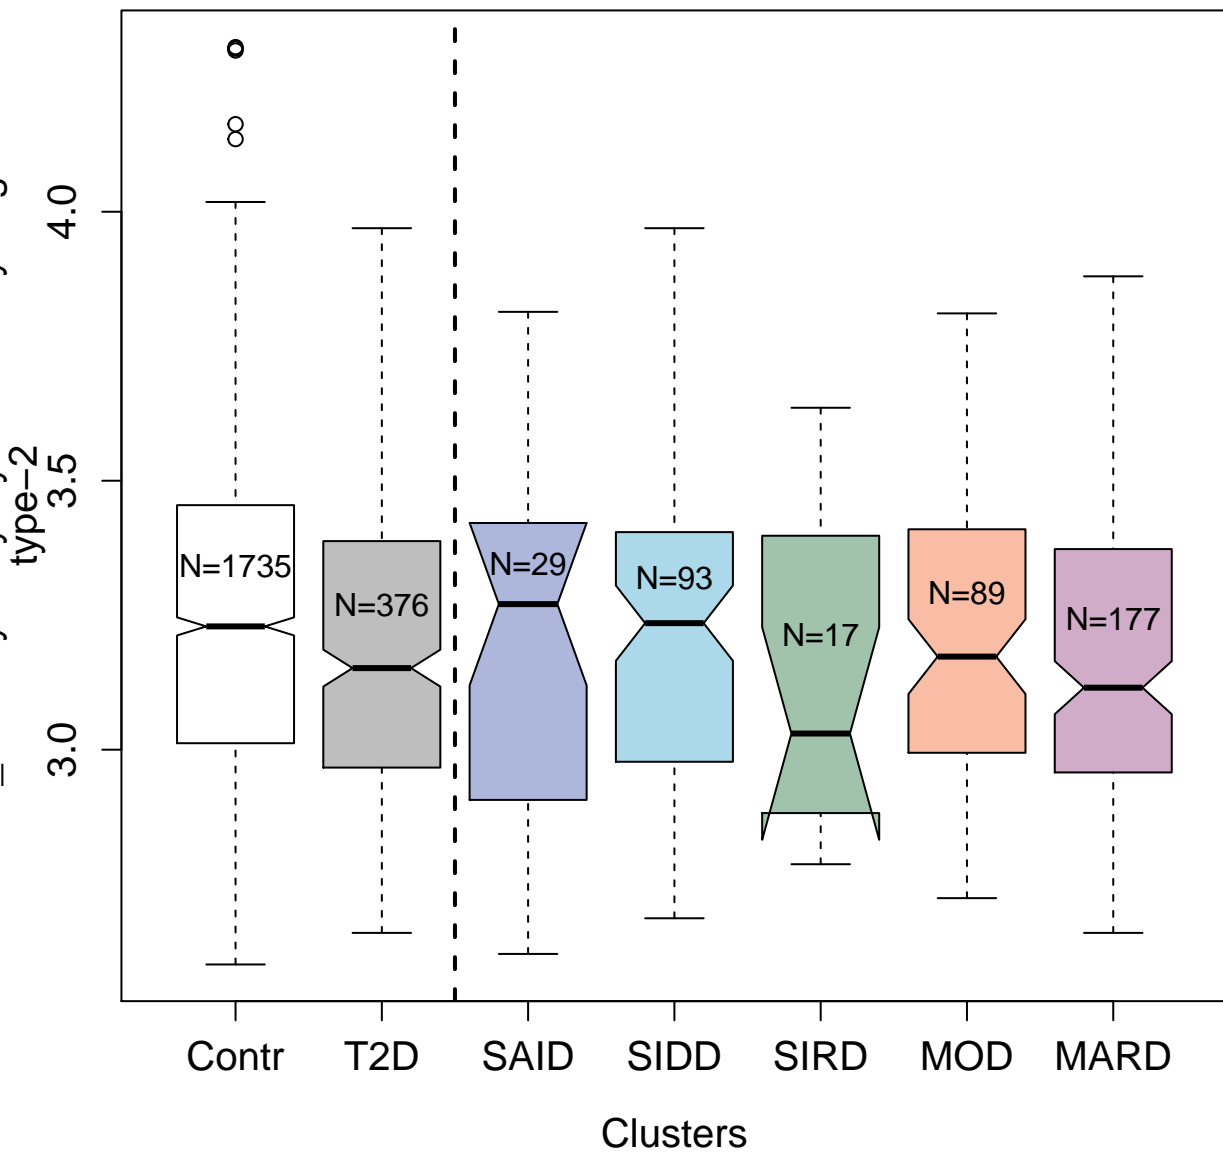

3860-7\_2 : Proteasome subunit alpha type-6

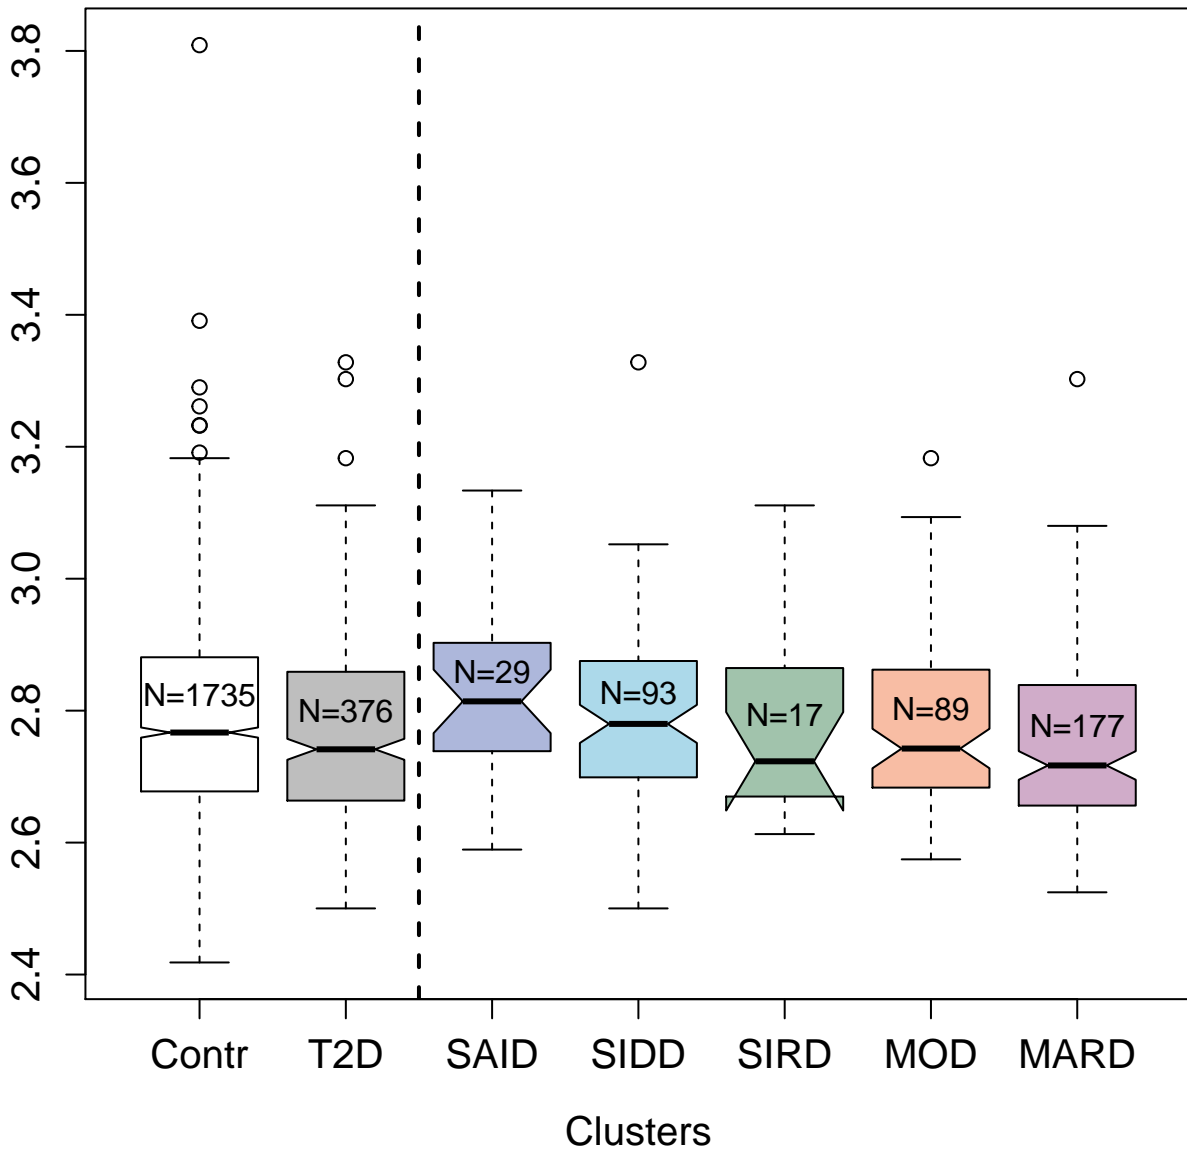

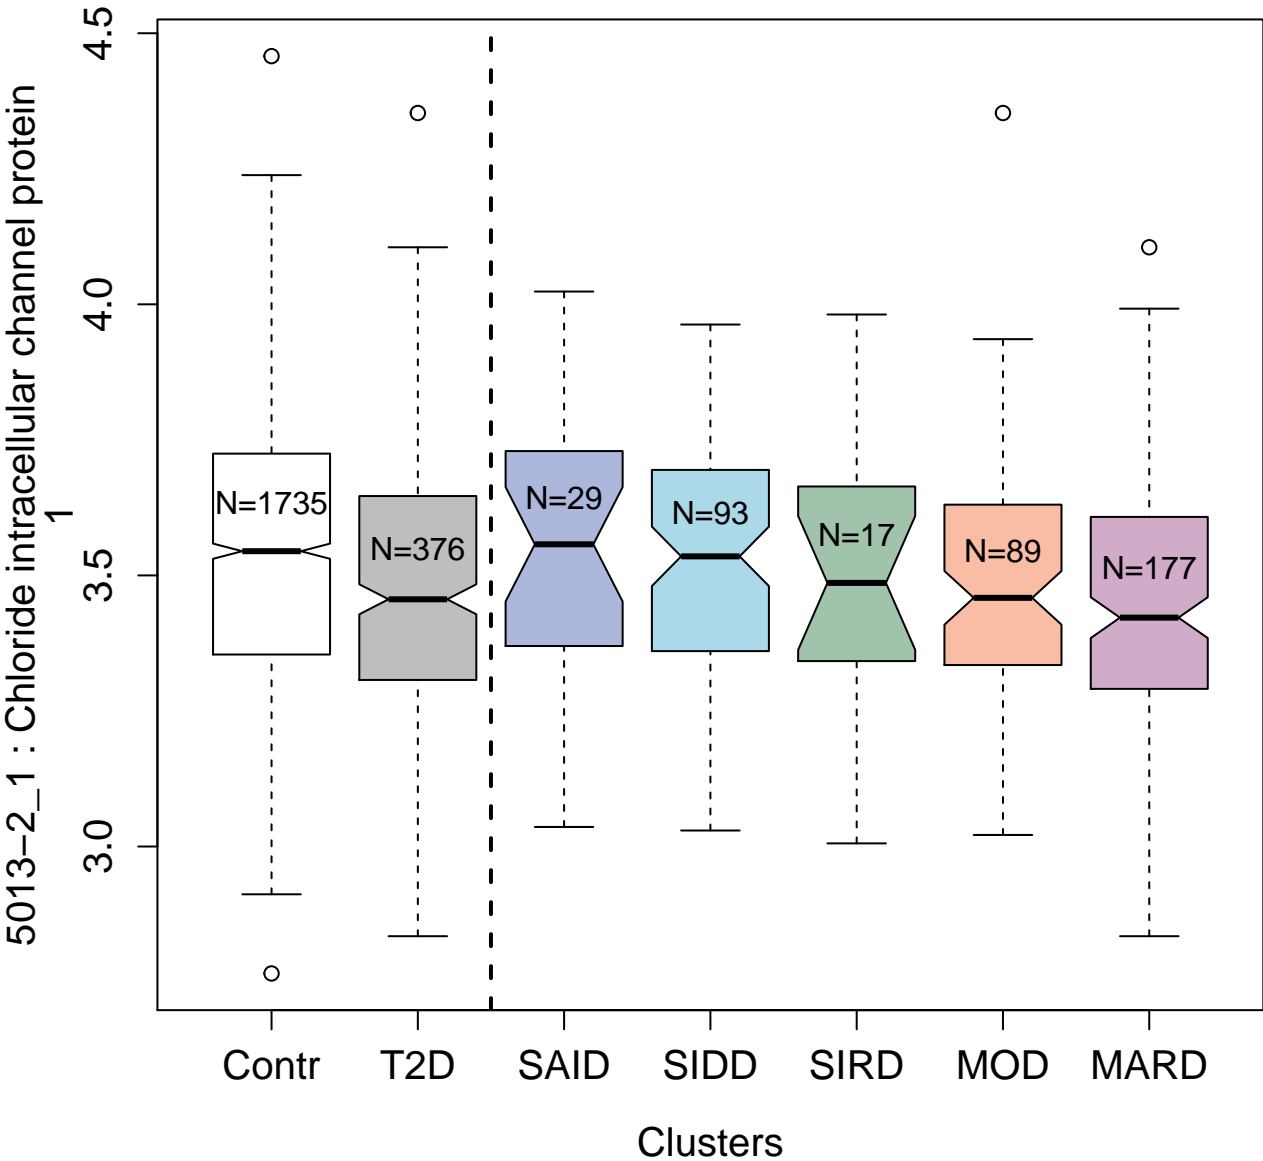



3820-68\_2 : MAP kinase-activated protein kinase 2

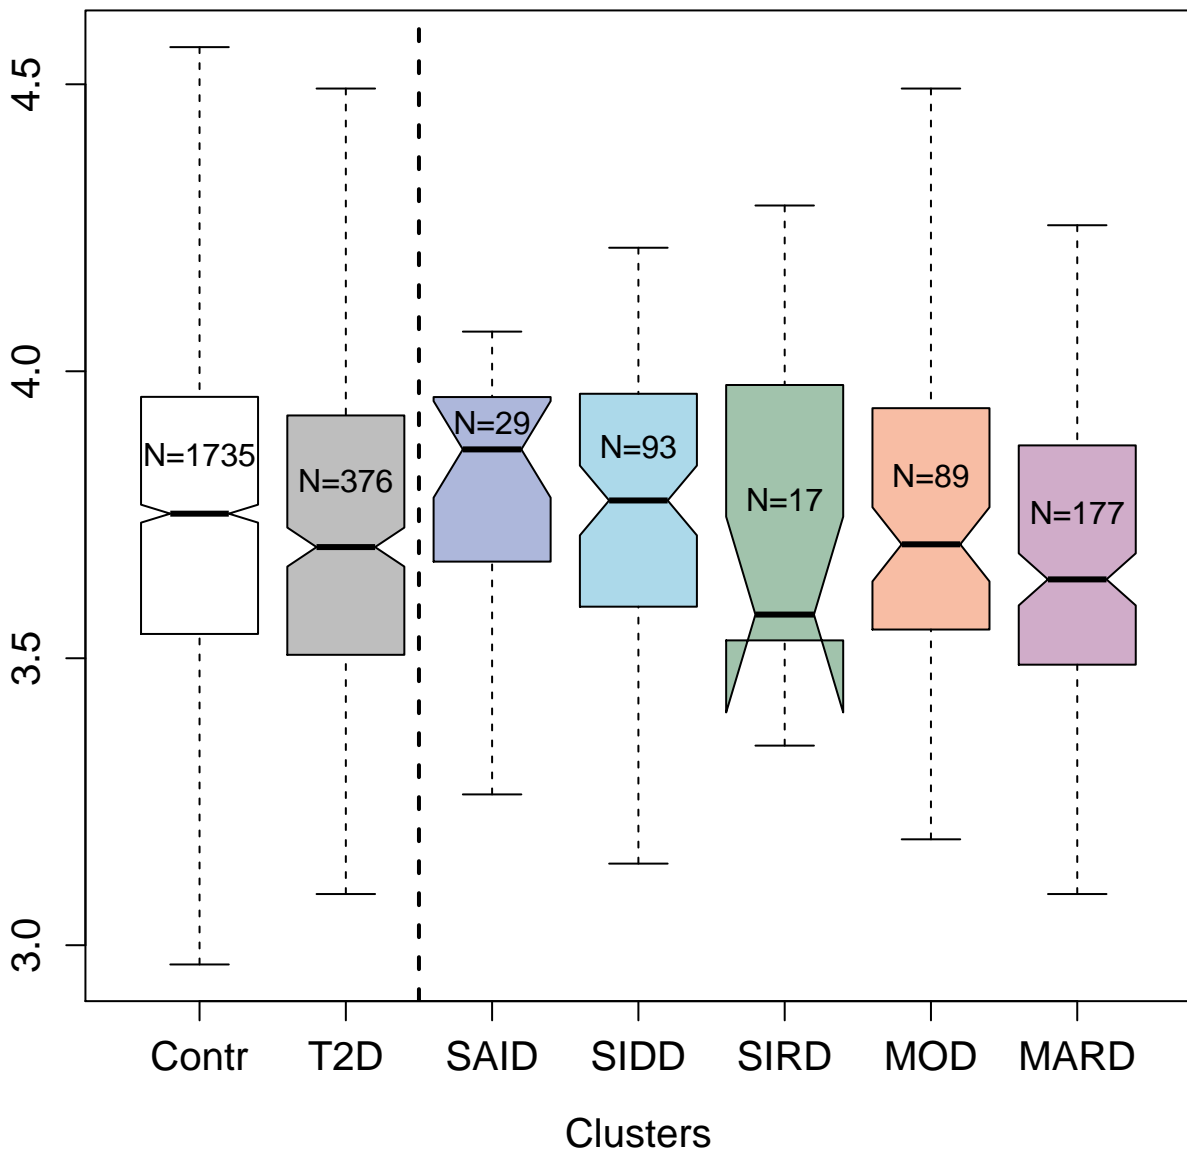

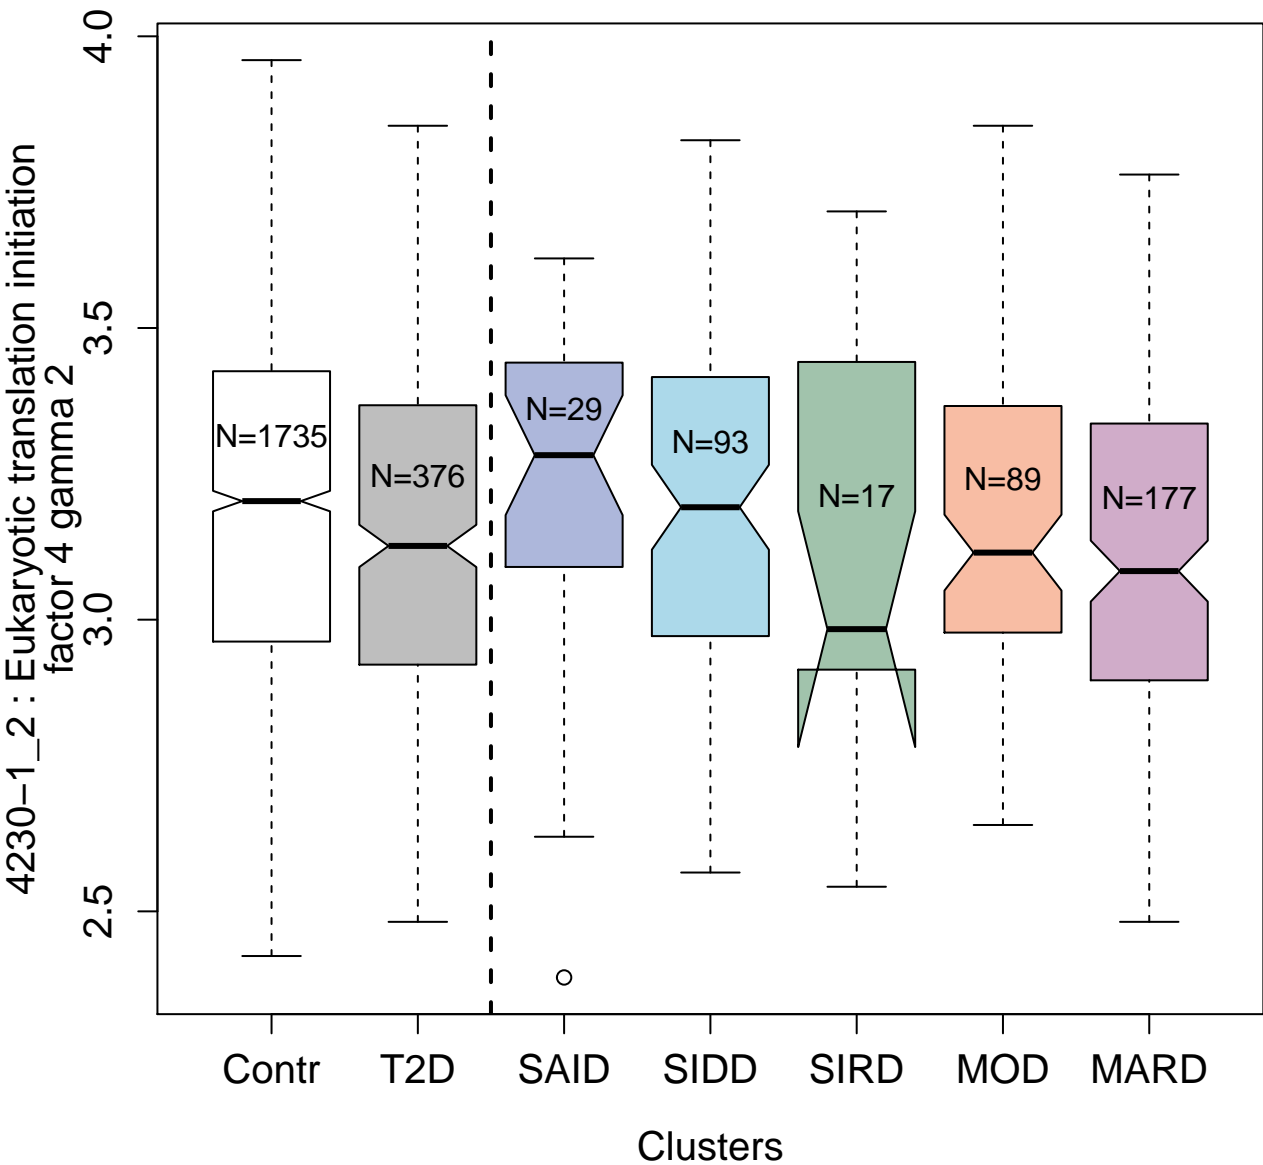

14124-6\_3 : Ephrin-A2

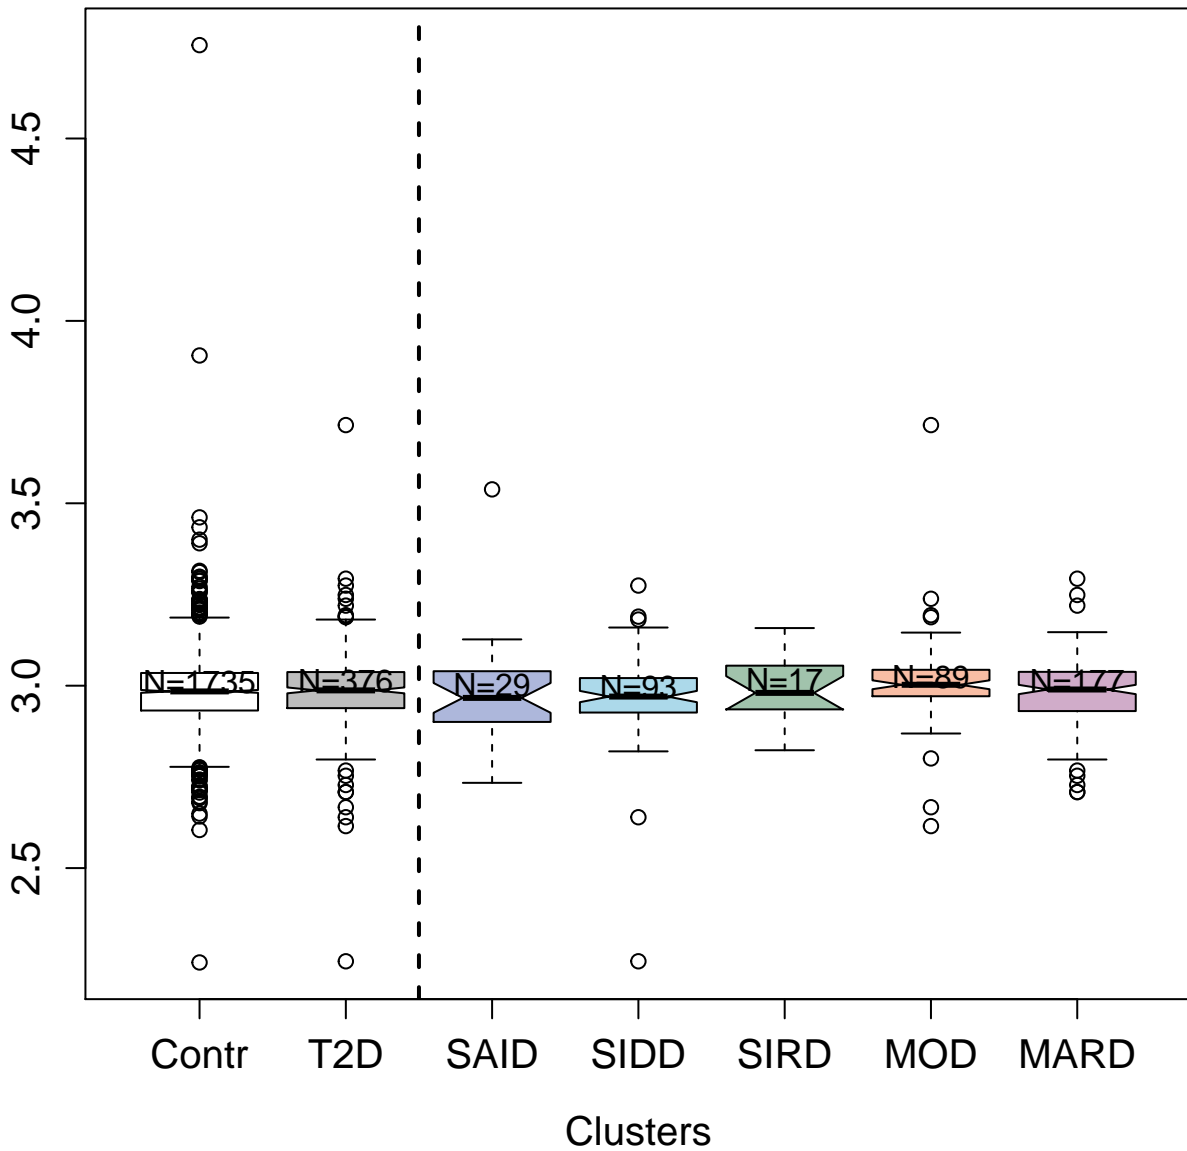

4874-3\_1 : Angiogenin

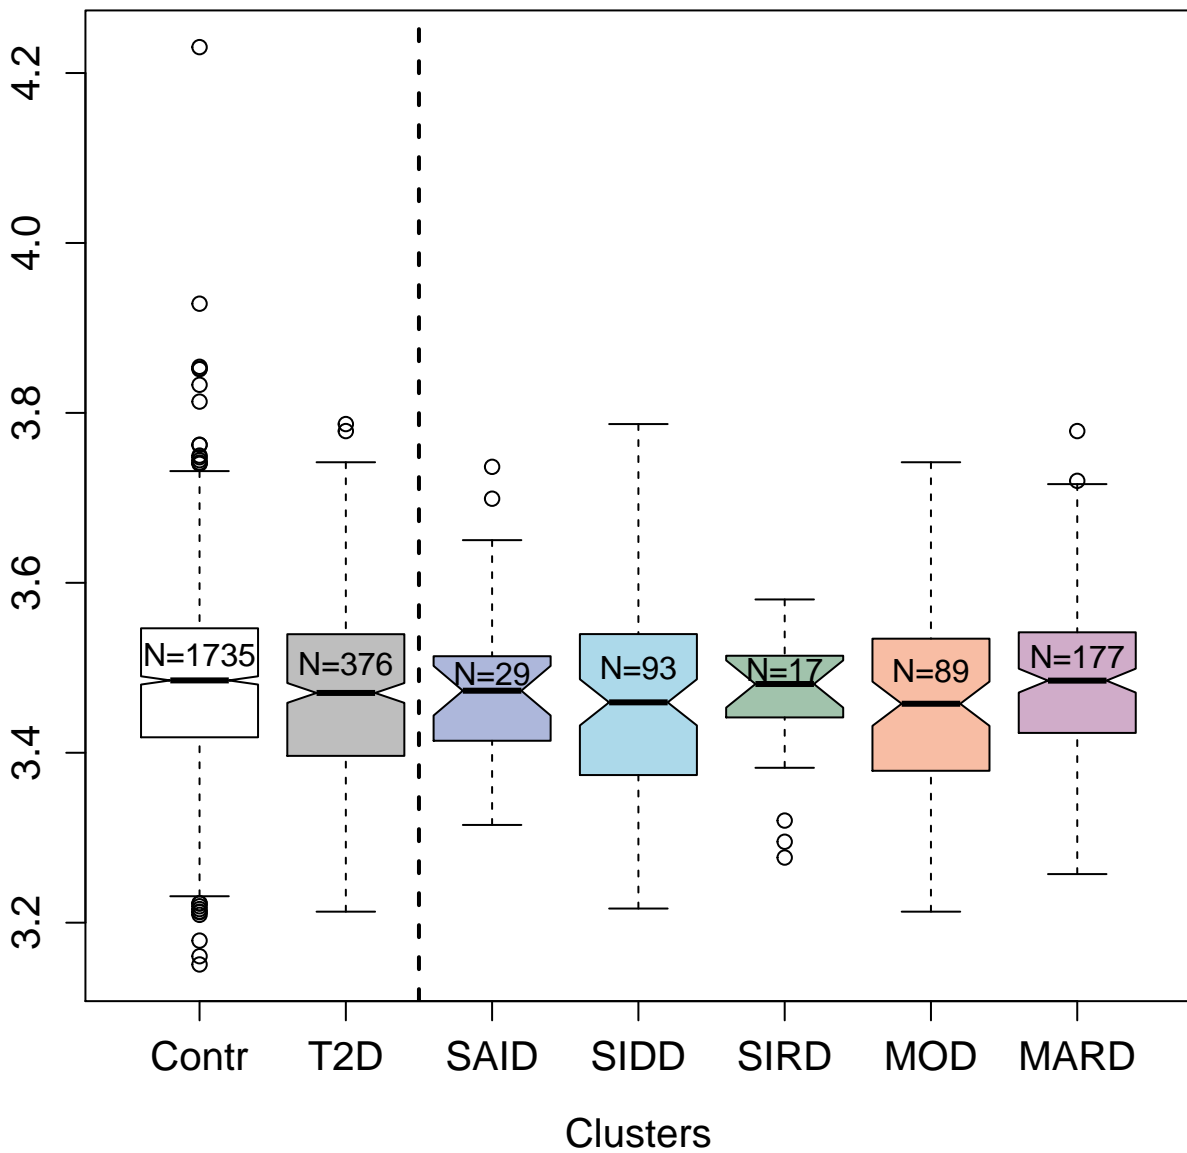

4990-87\_1 : Platelet glycoprotein Ib alpha chain

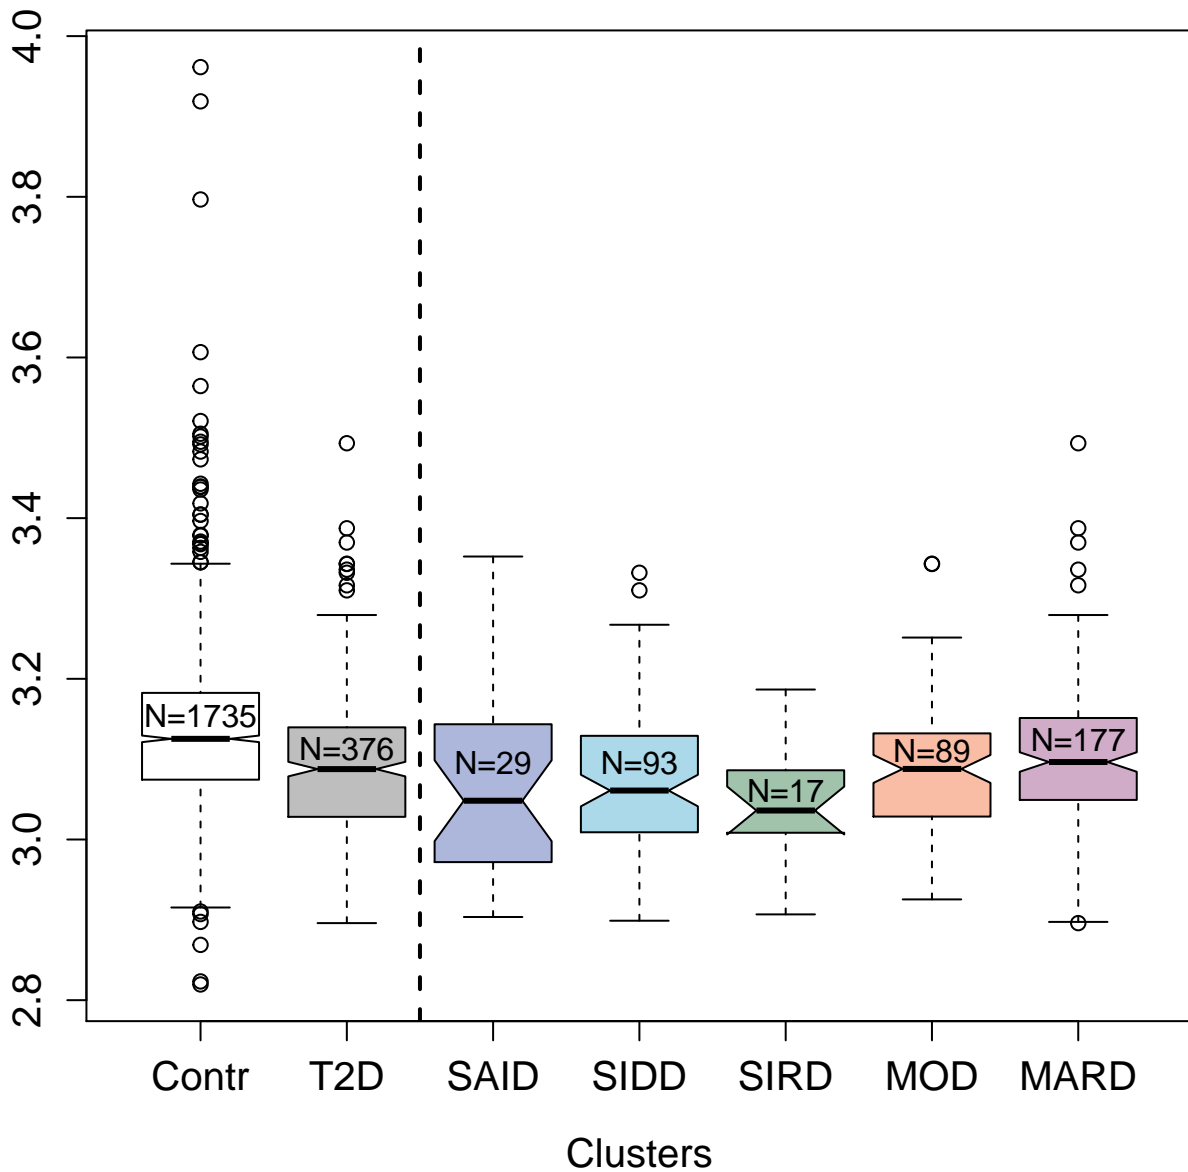

4994-178\_1 : Heterogeneous nuclear  
ribonucleoprotein K

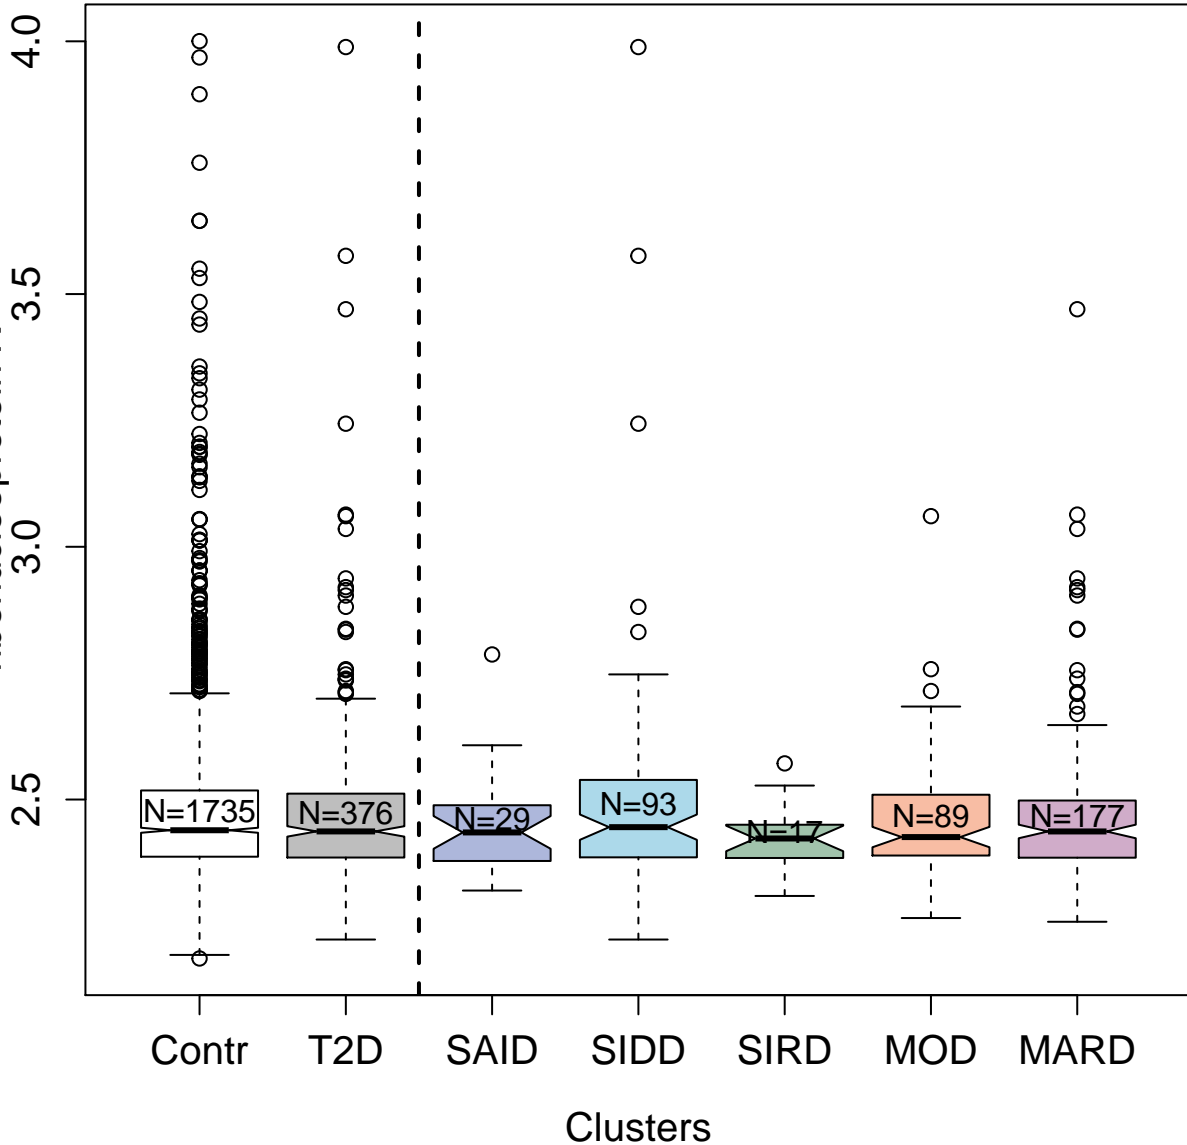

5810-25\_3 : Teratocarcinoma-derived growth factor

1

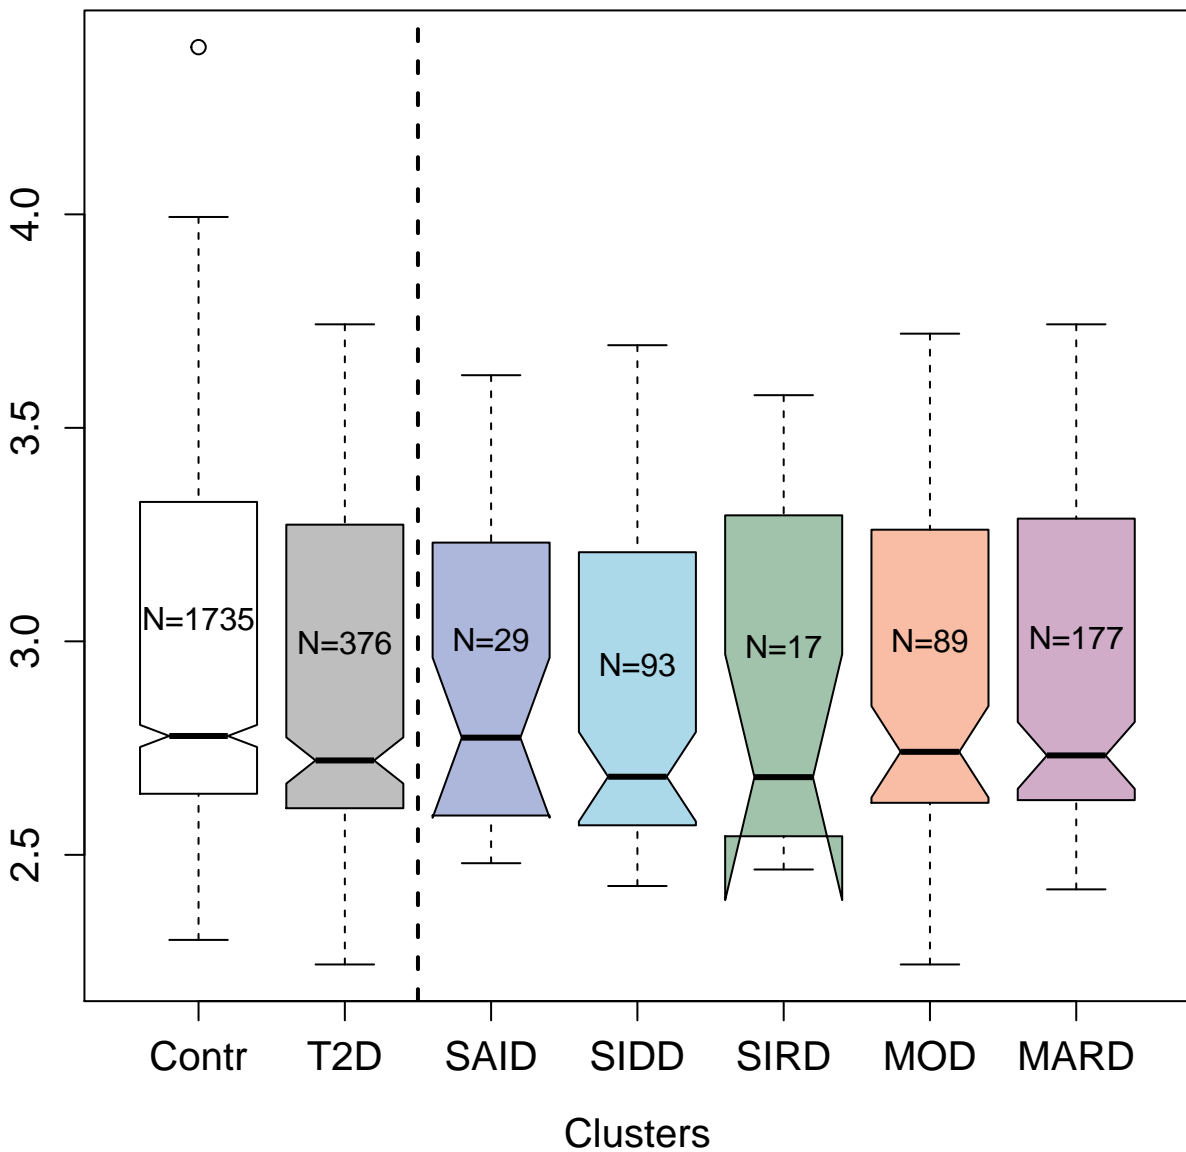

5885-55\_3 : Eukaryotic translation initiation factor 4H

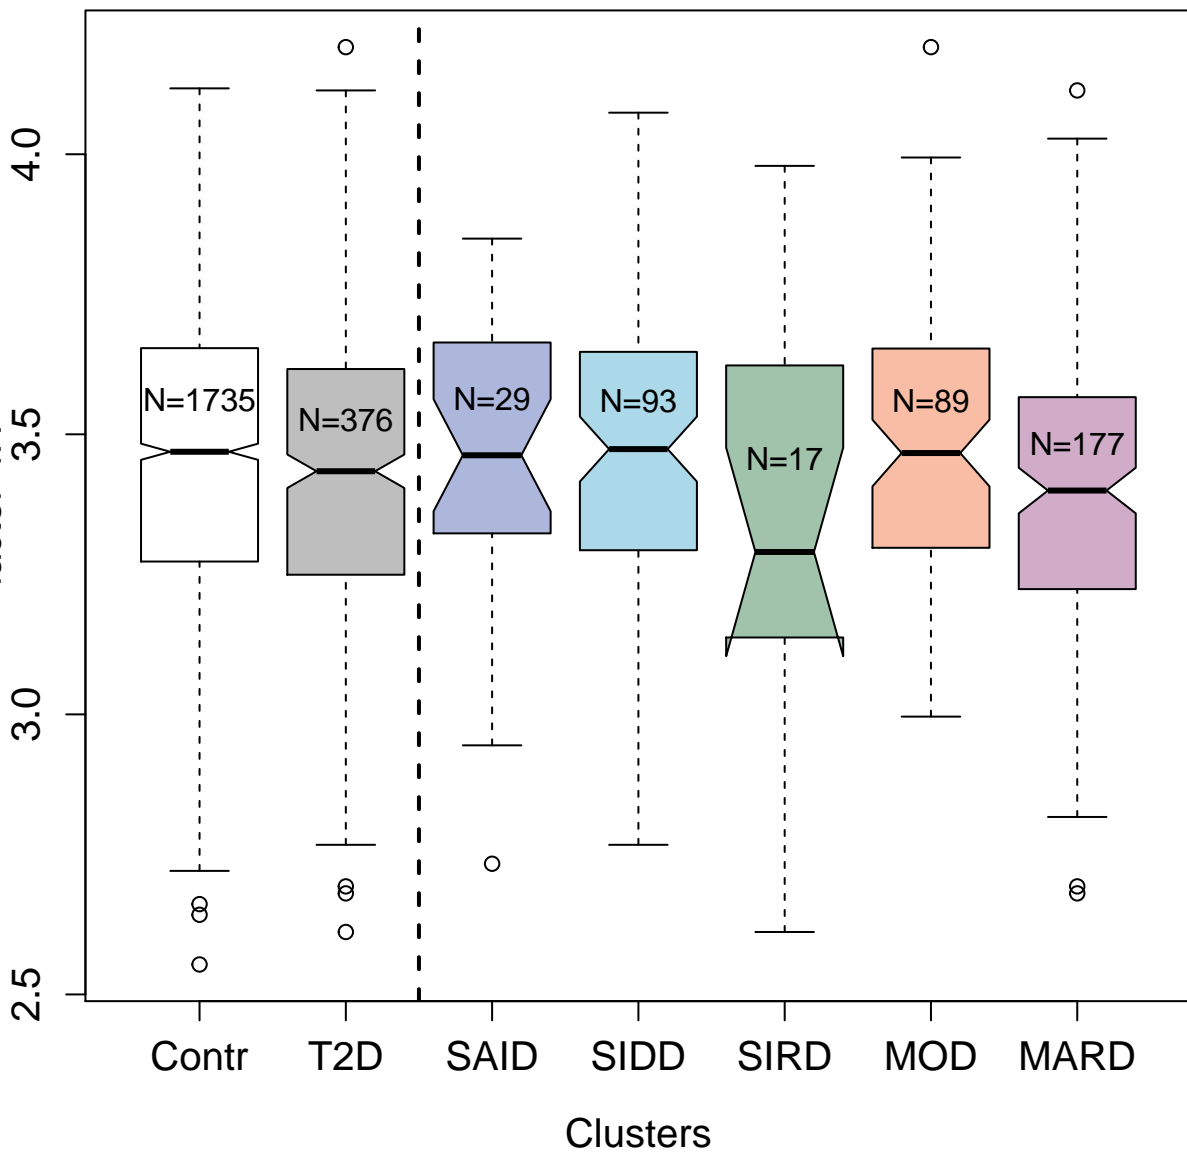



4437-56\_3 : Ectonucleoside triphosphate  
diphosphohydrolase 5

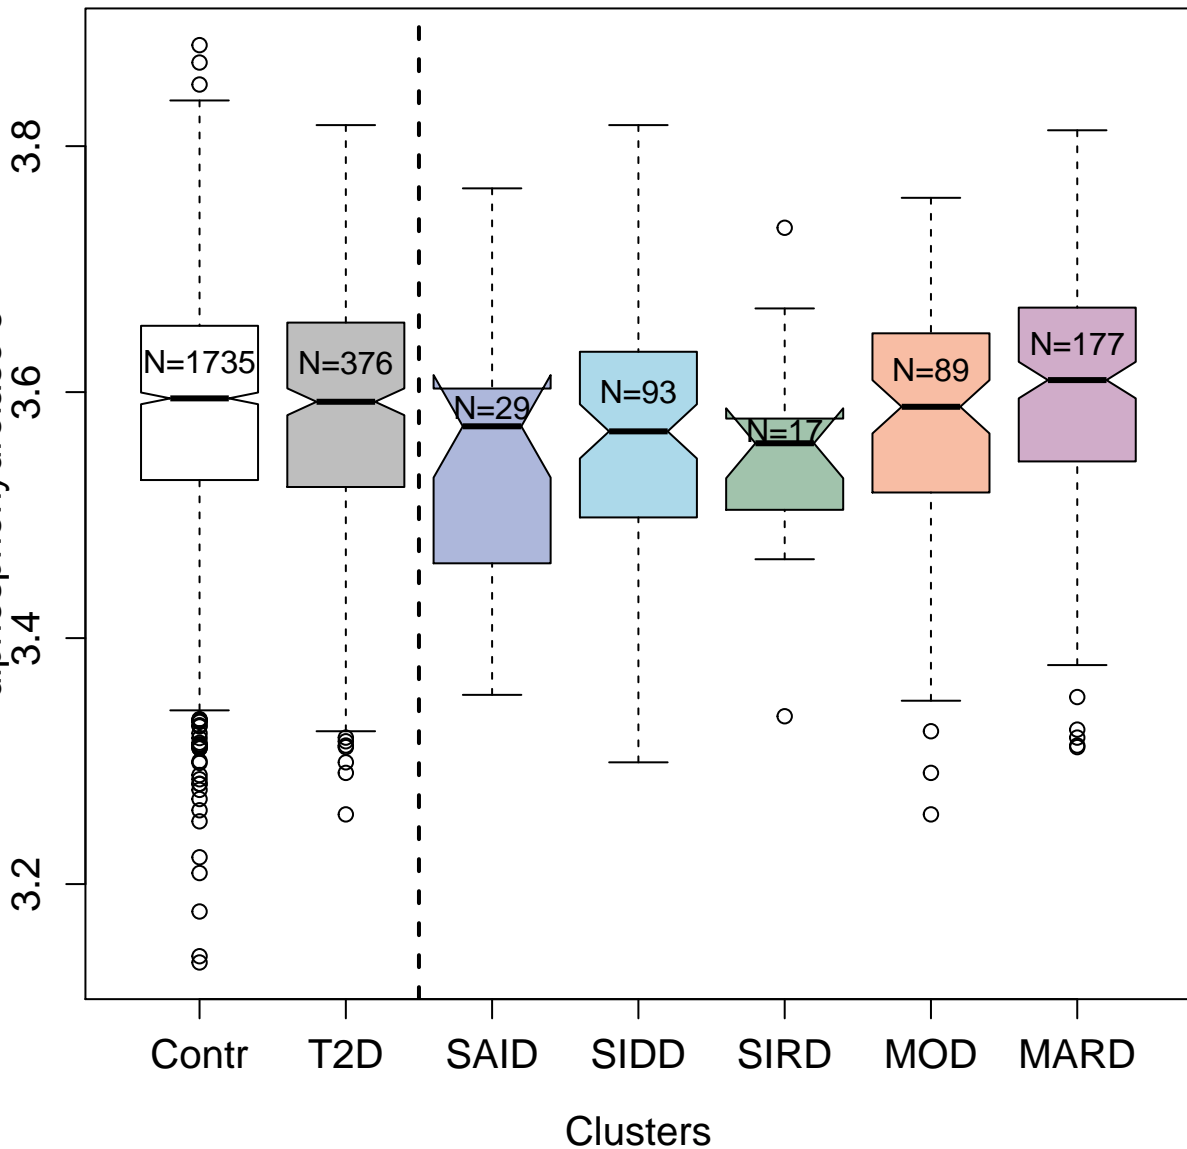

3859-50\_2 : Proteasome subunit alpha type-1

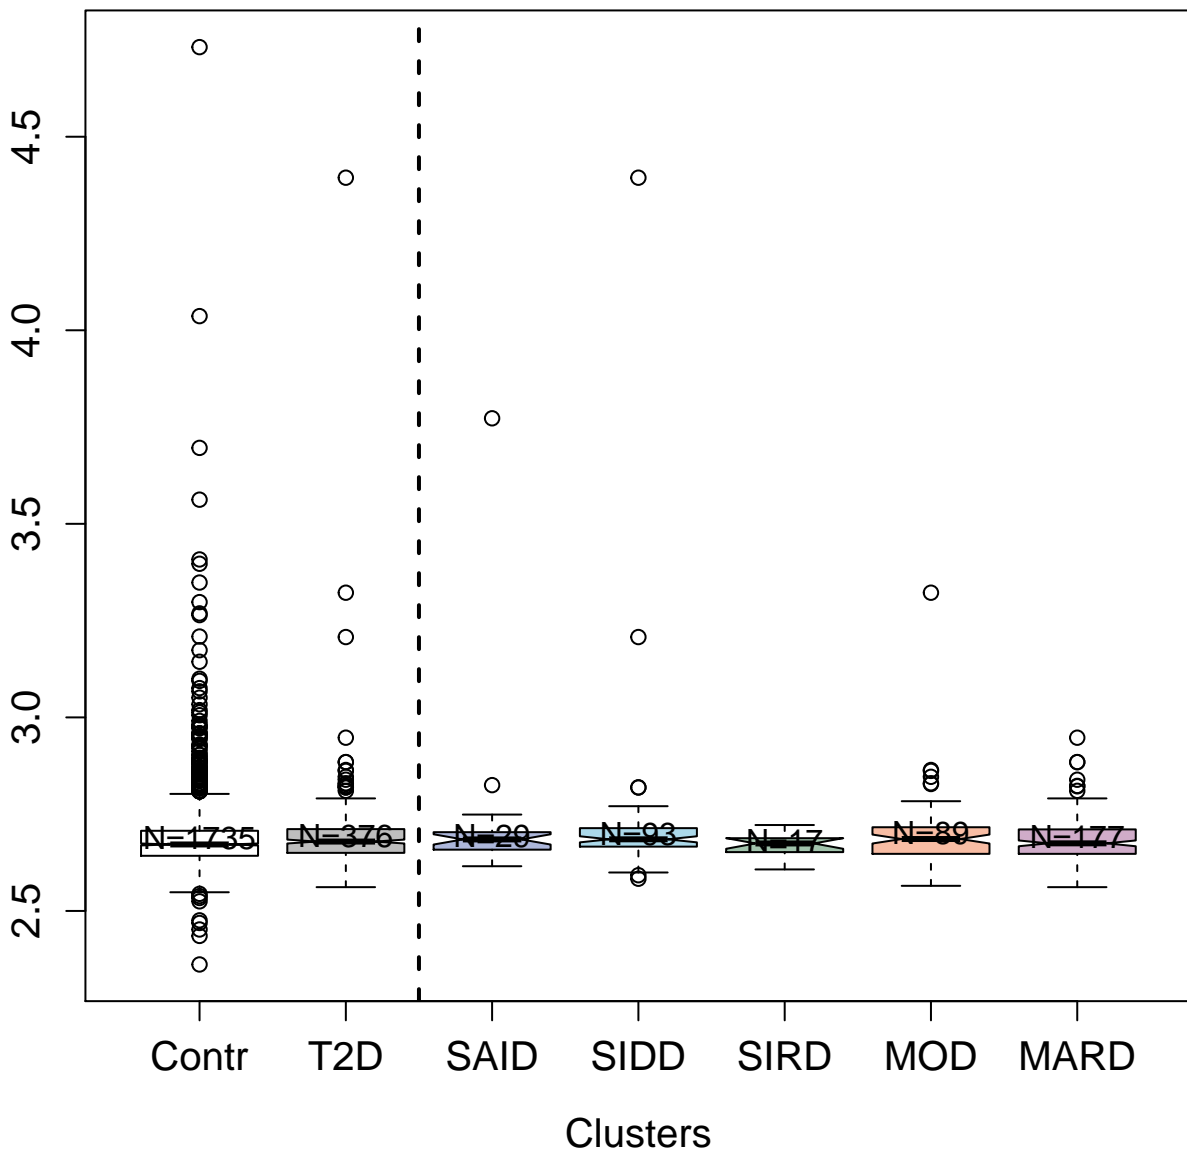

3320-49\_2 : Insulin-like growth factor-binding

protein 7

3.8 4.0 4.2 4.4 4.6 4.8 5.0

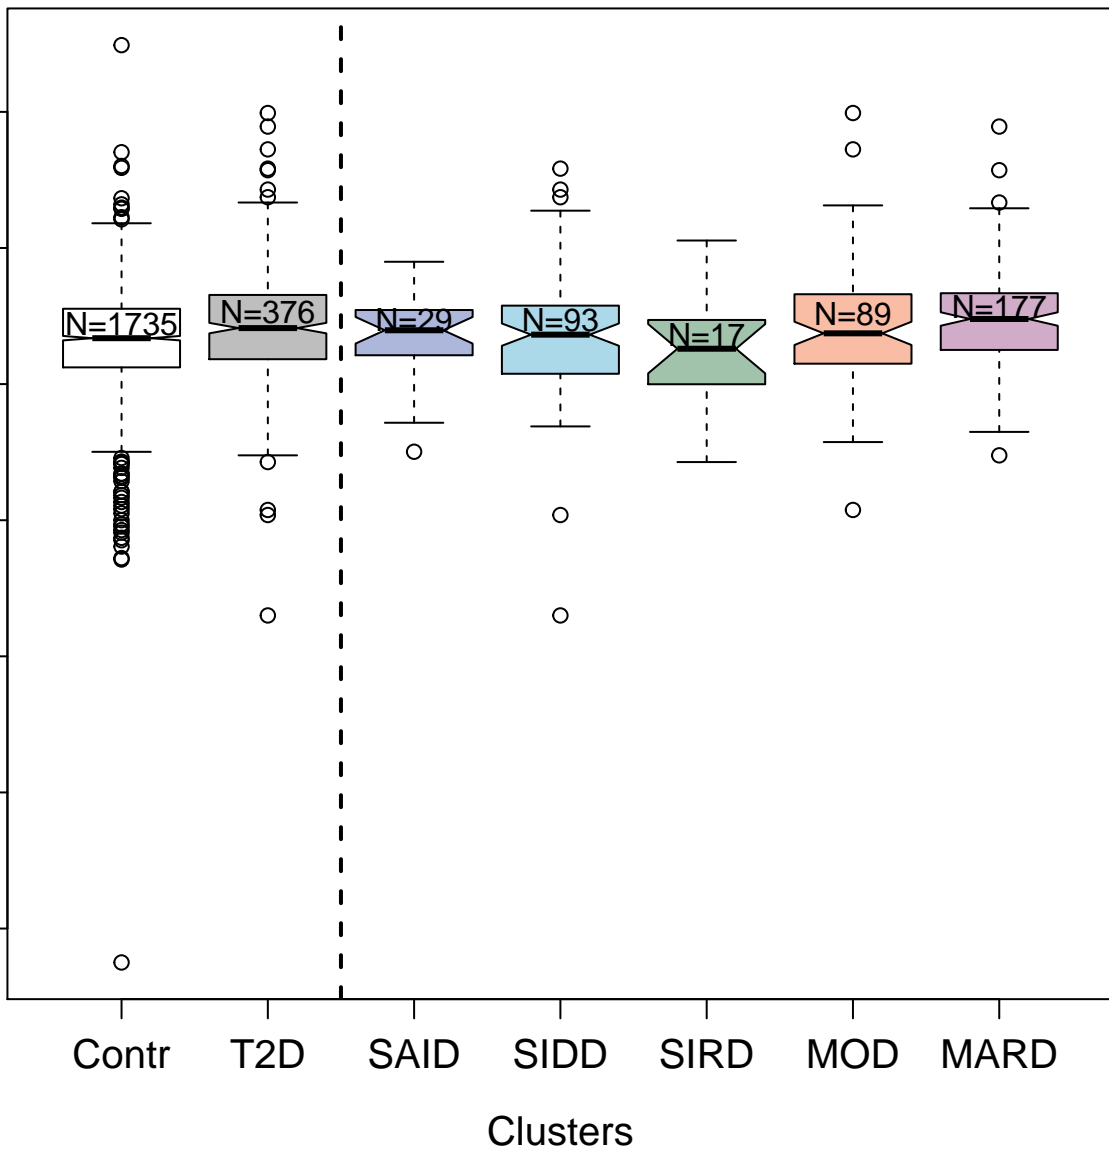

5131-15\_3 : Tumor necrosis factor receptor  
superfamily member 19

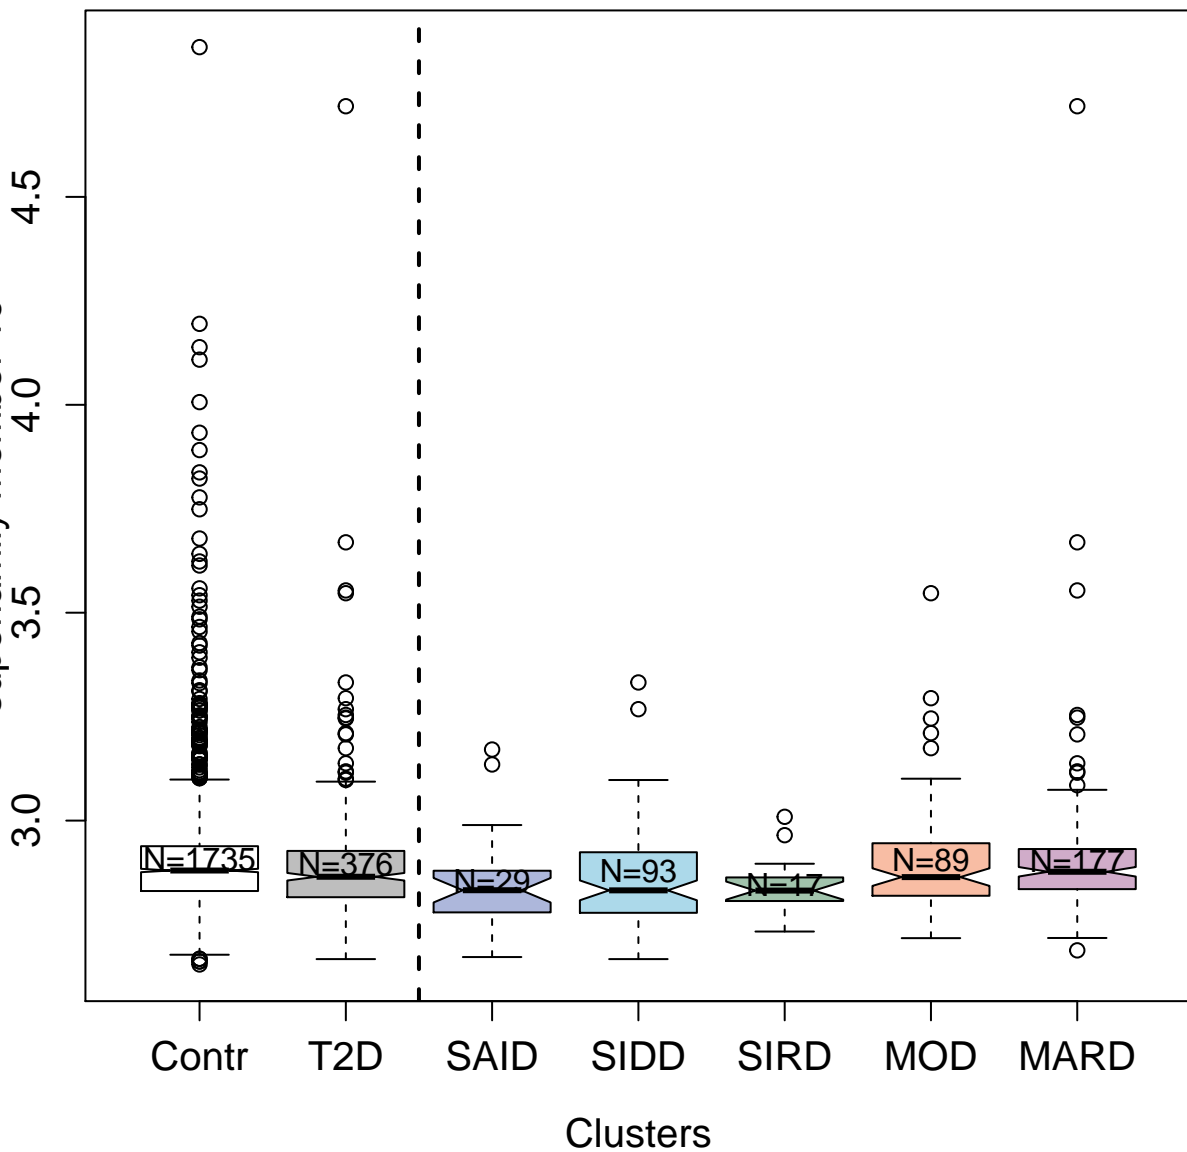

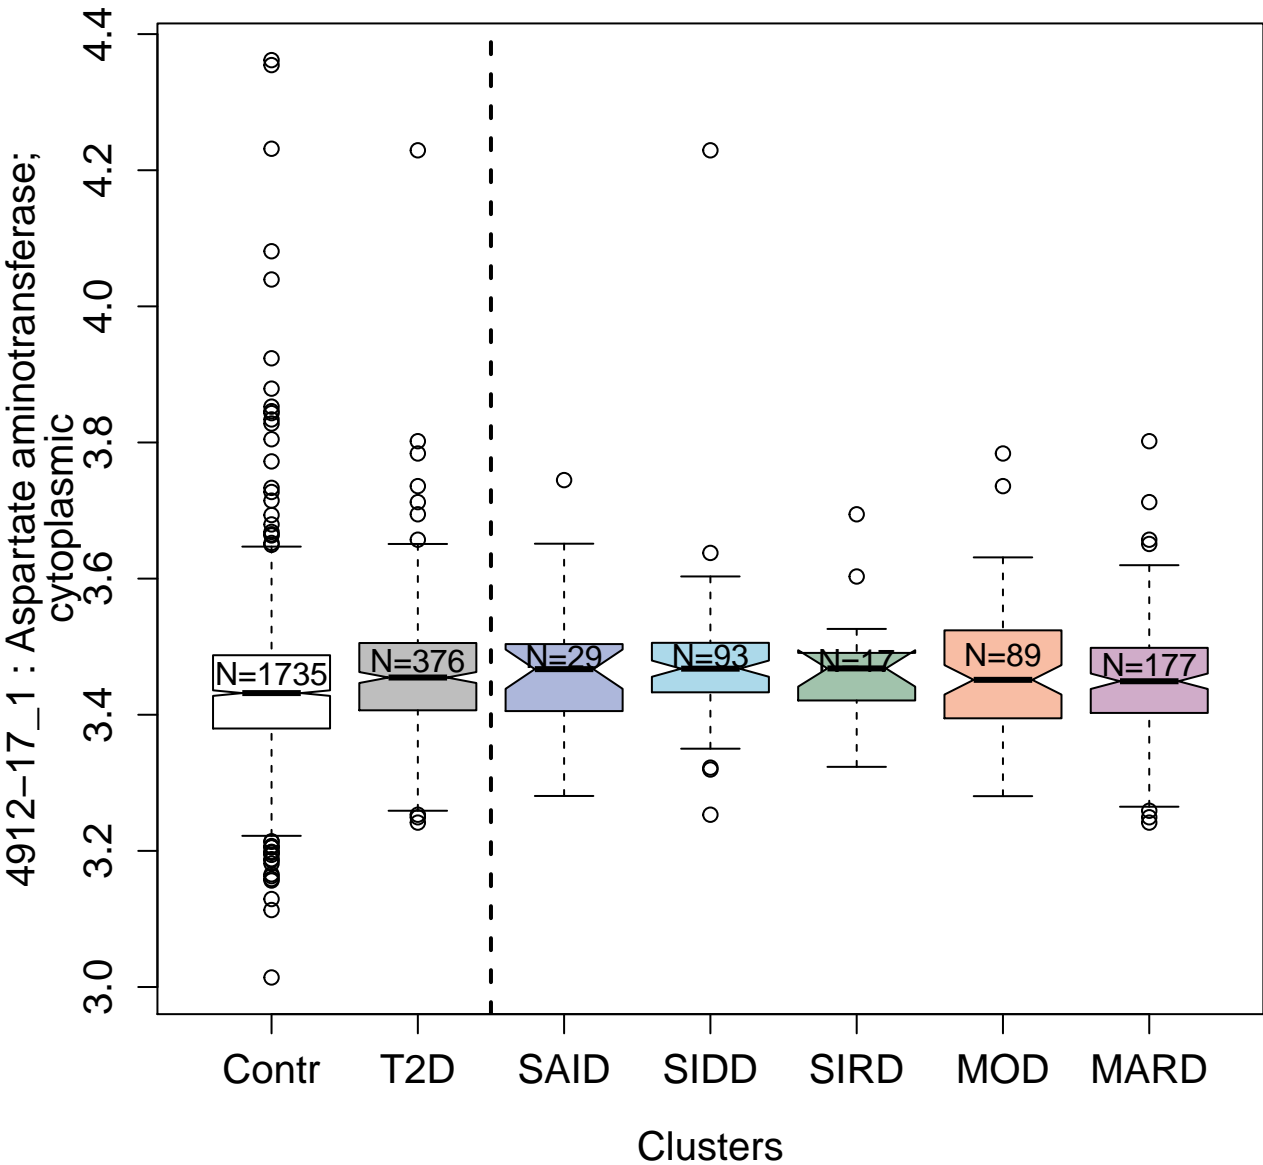

3284-75\_1 : Biglycan

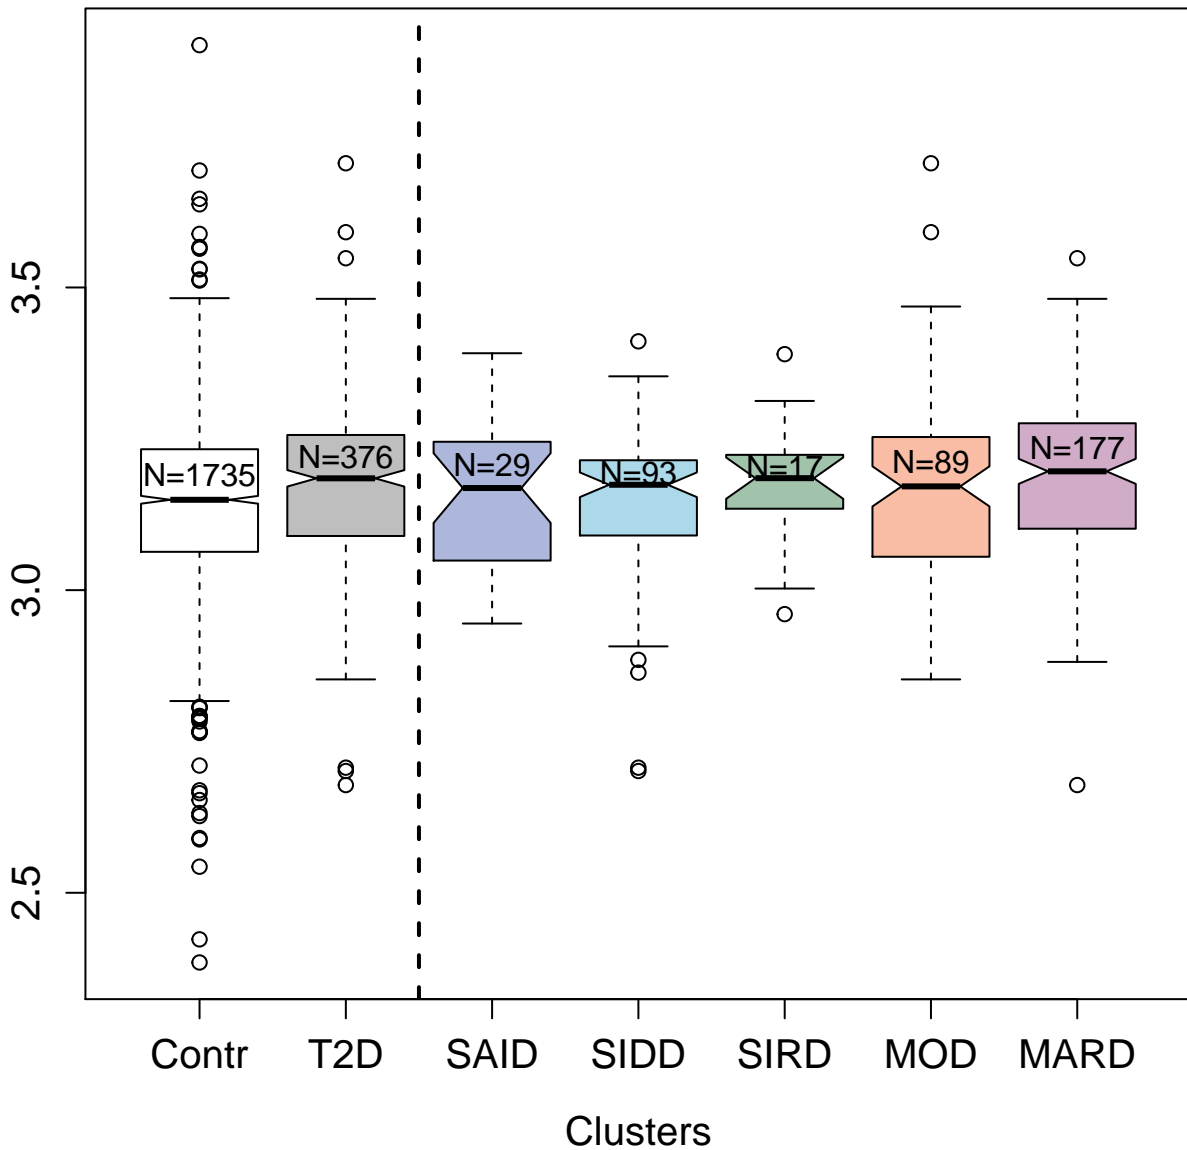

3174-2\_1 : A disintegrin and metalloproteinase  
with thrombospondin motifs 1

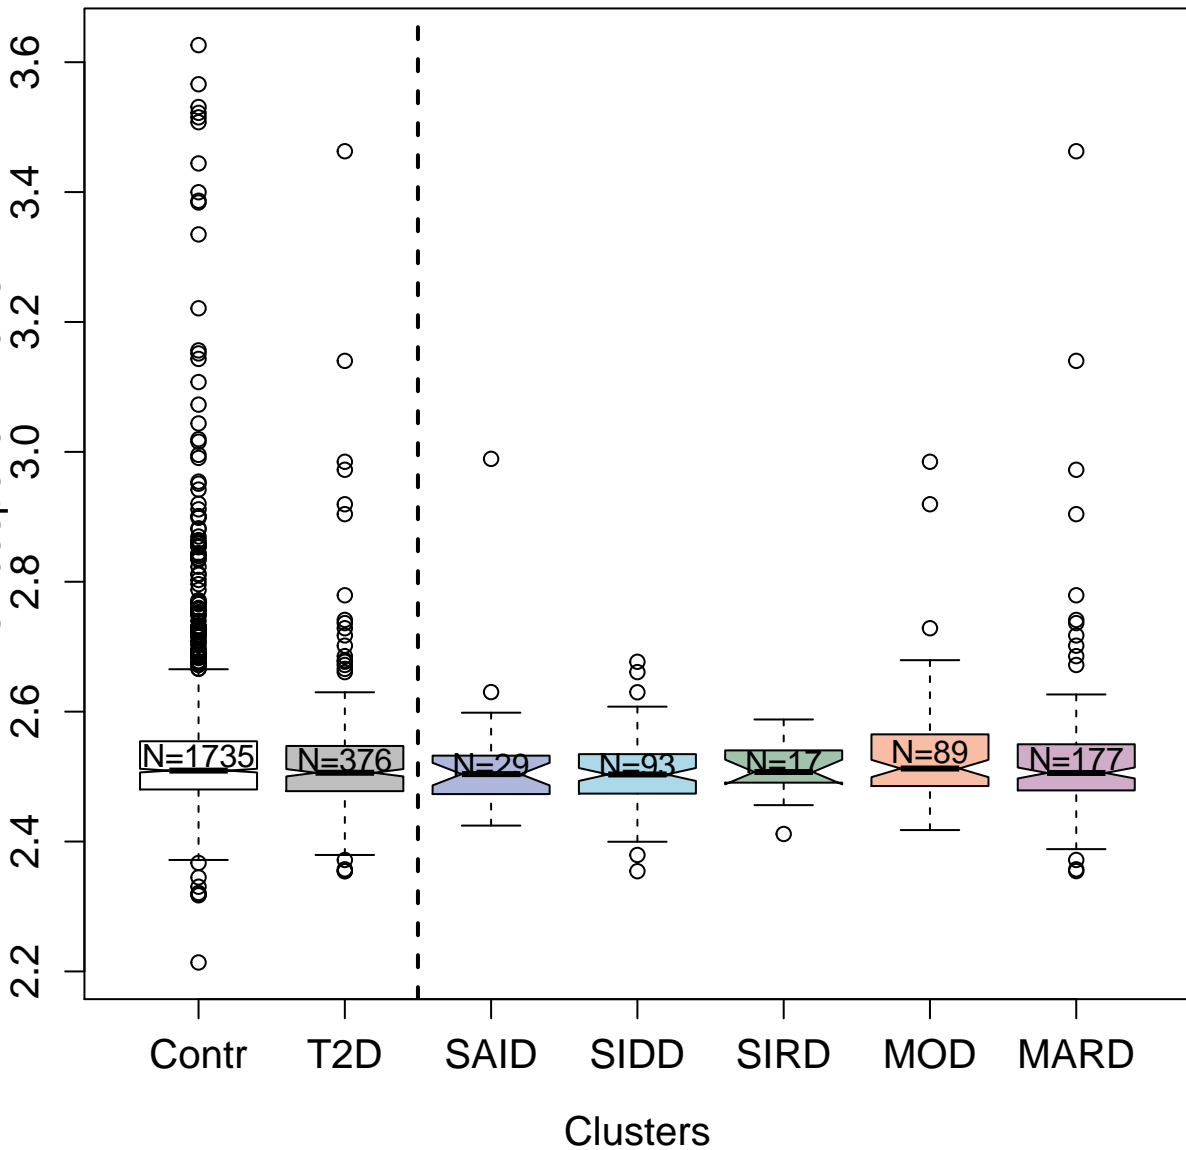

4336-2\_1 : Serum amyloid A-1 protein

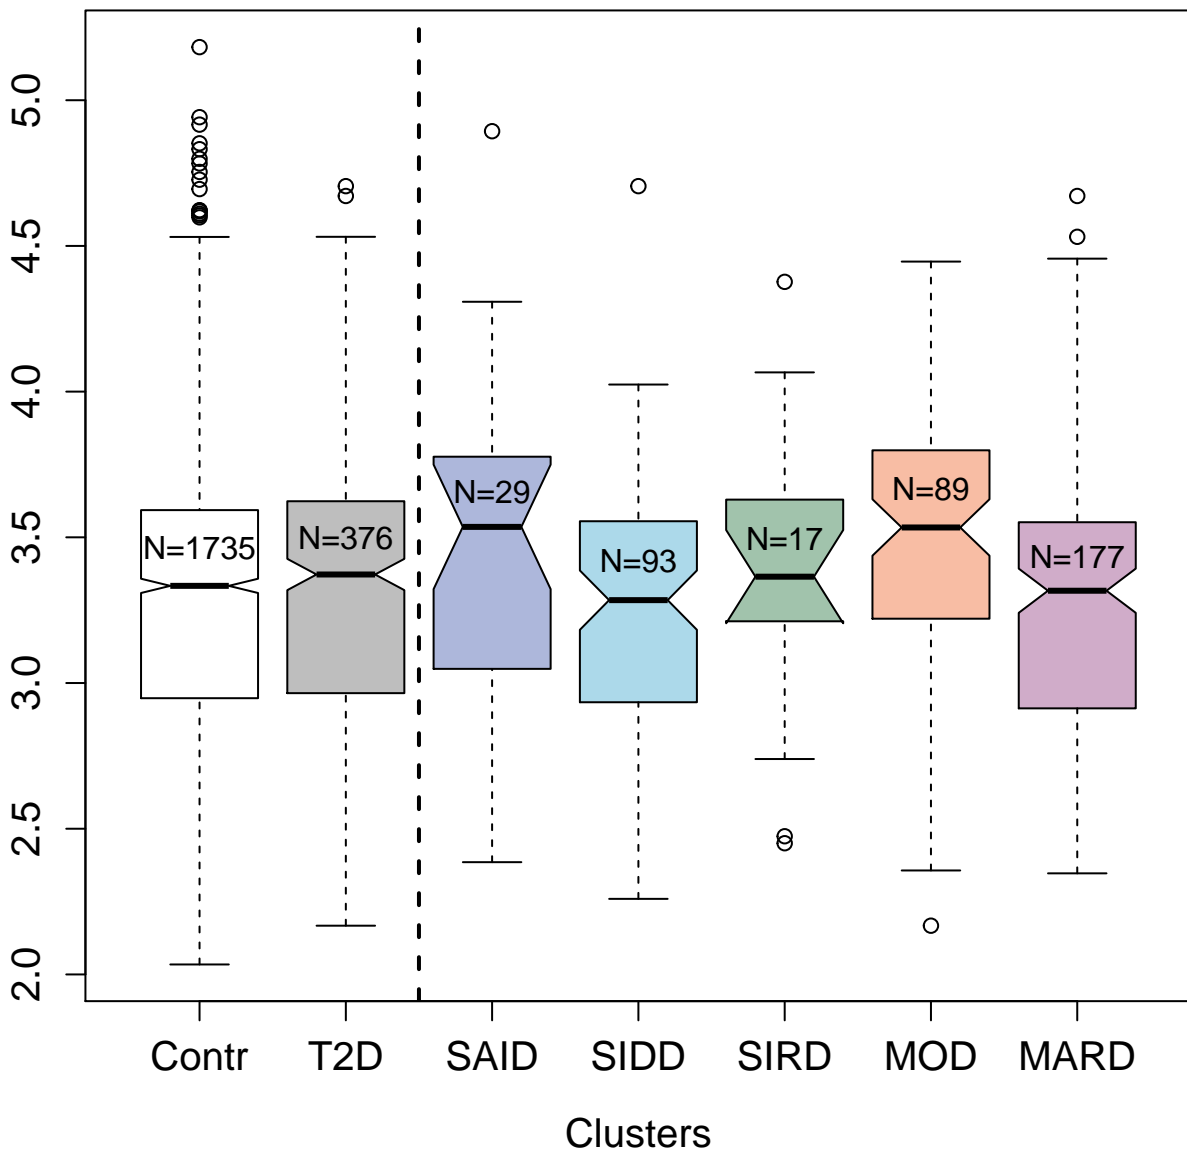



5475-10\_3 : Protein kinase C beta type (splice variant beta-II)

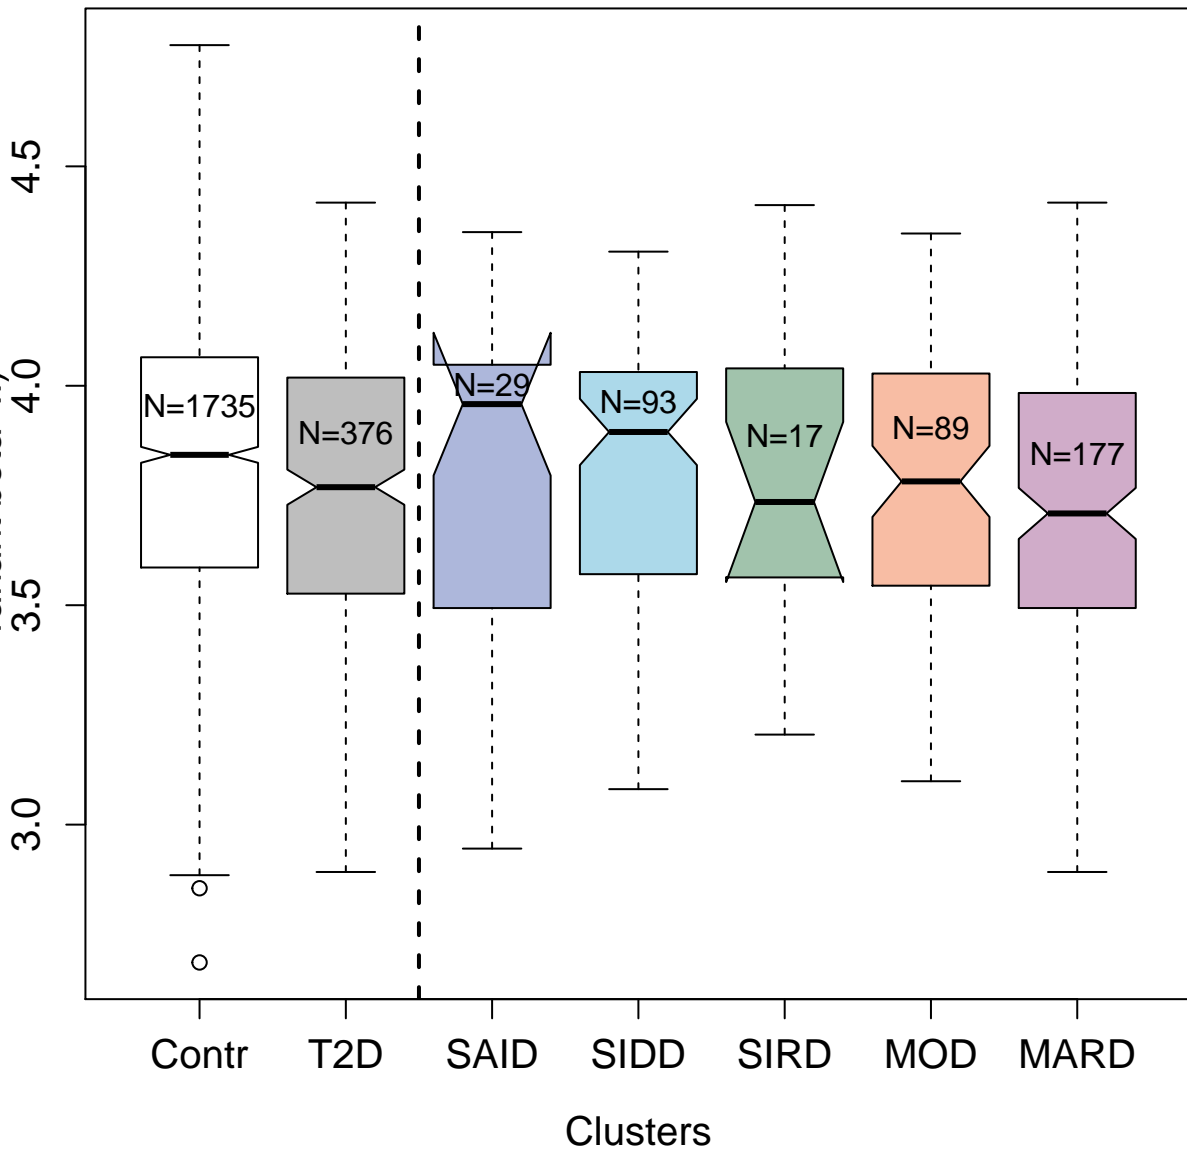

3363-31\_4 : Tyrosine-protein kinase CSK

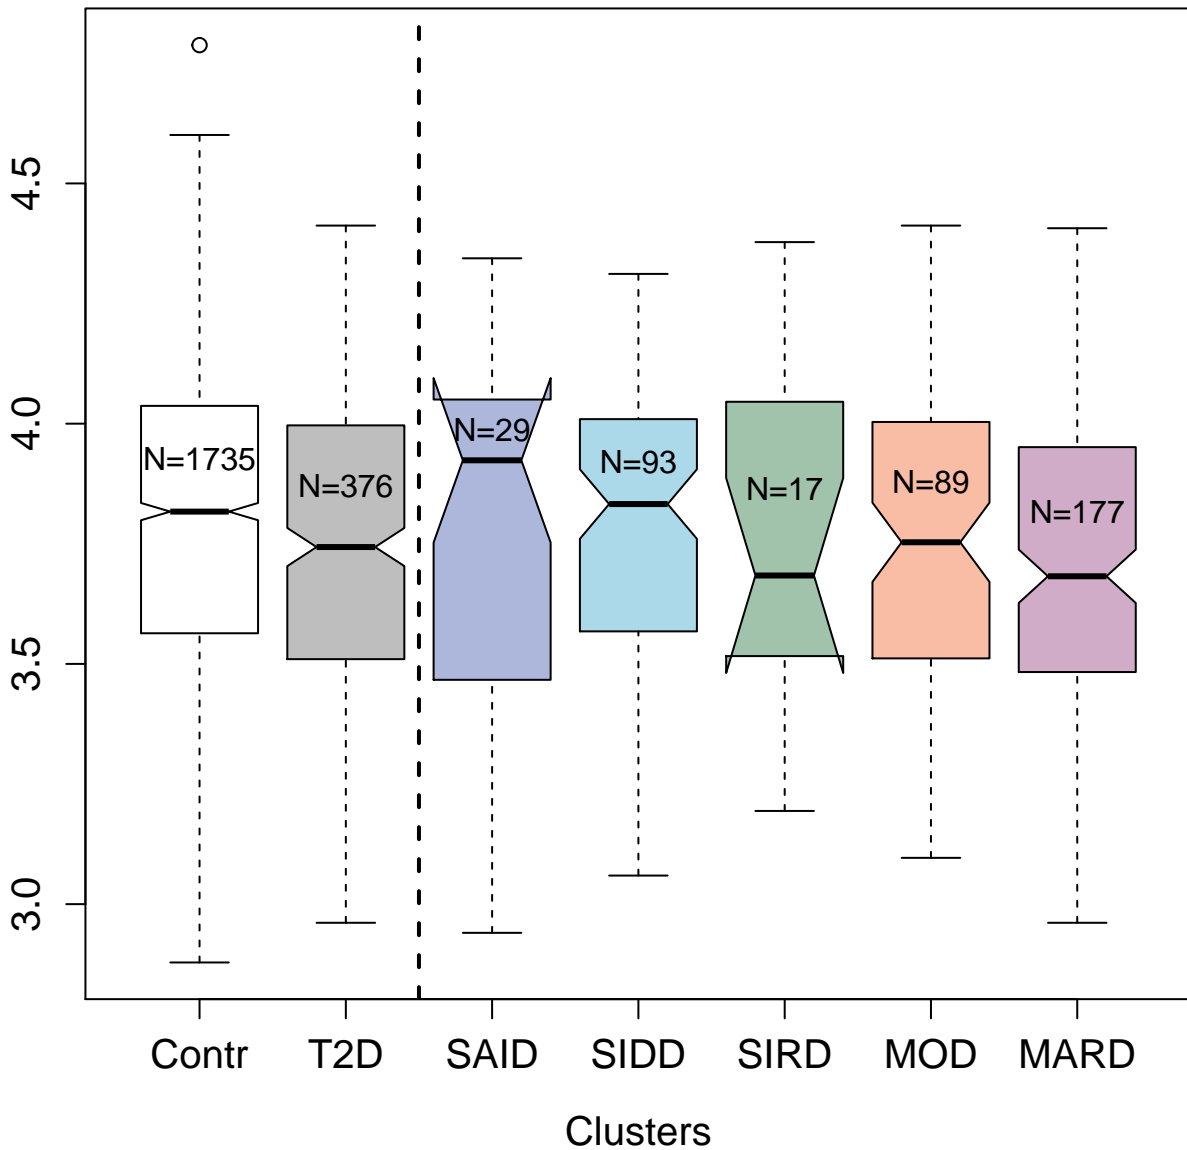

5133-17\_3 : TGF-beta receptor type-2

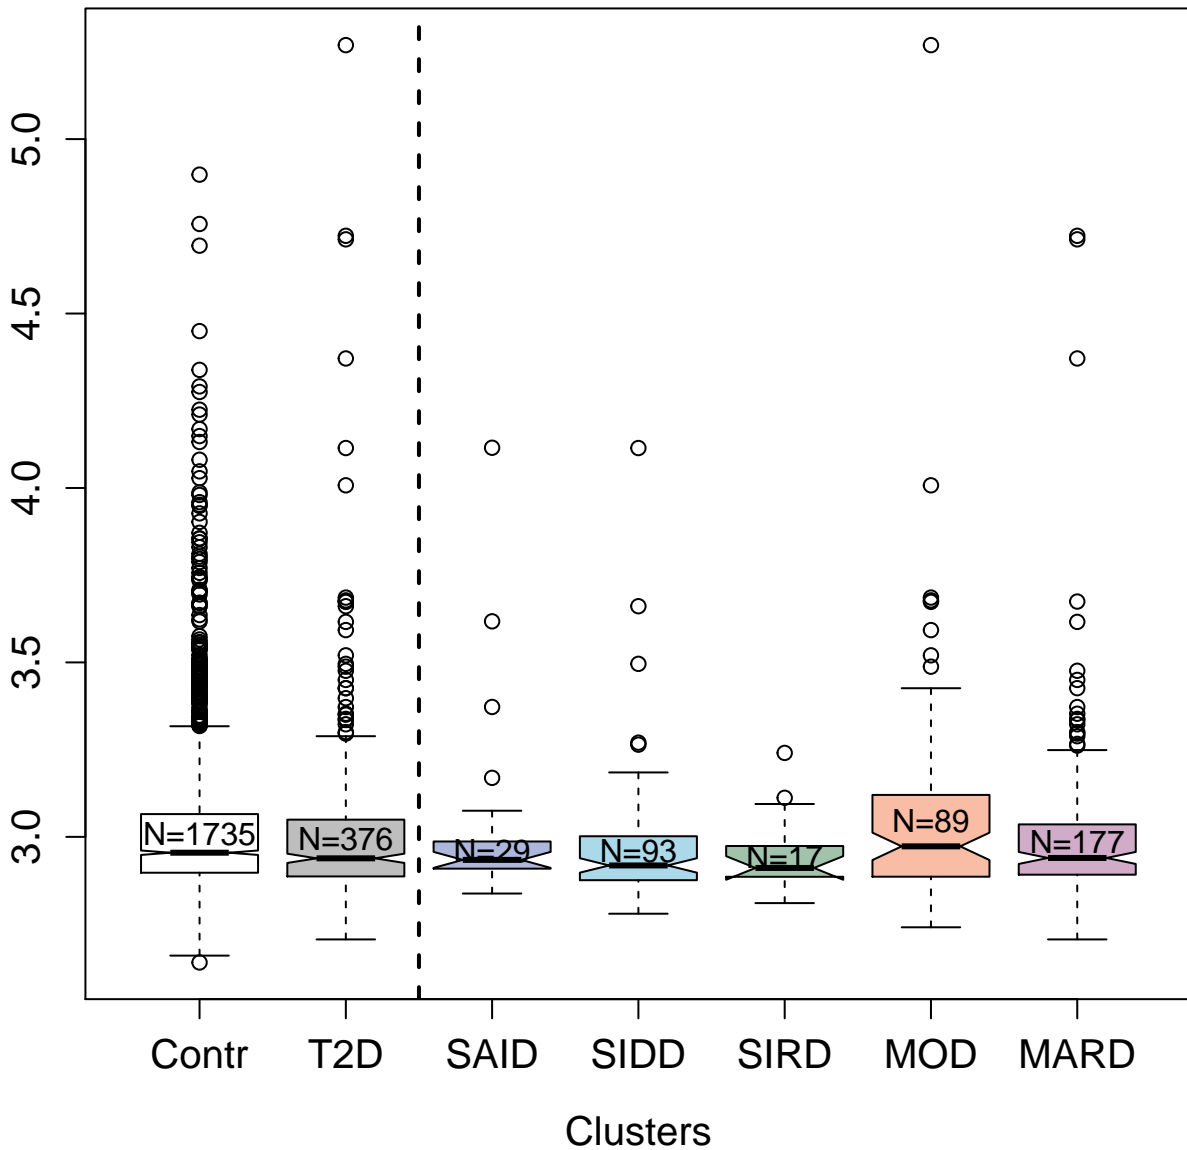

5061-27\_3 : ICOS ligand

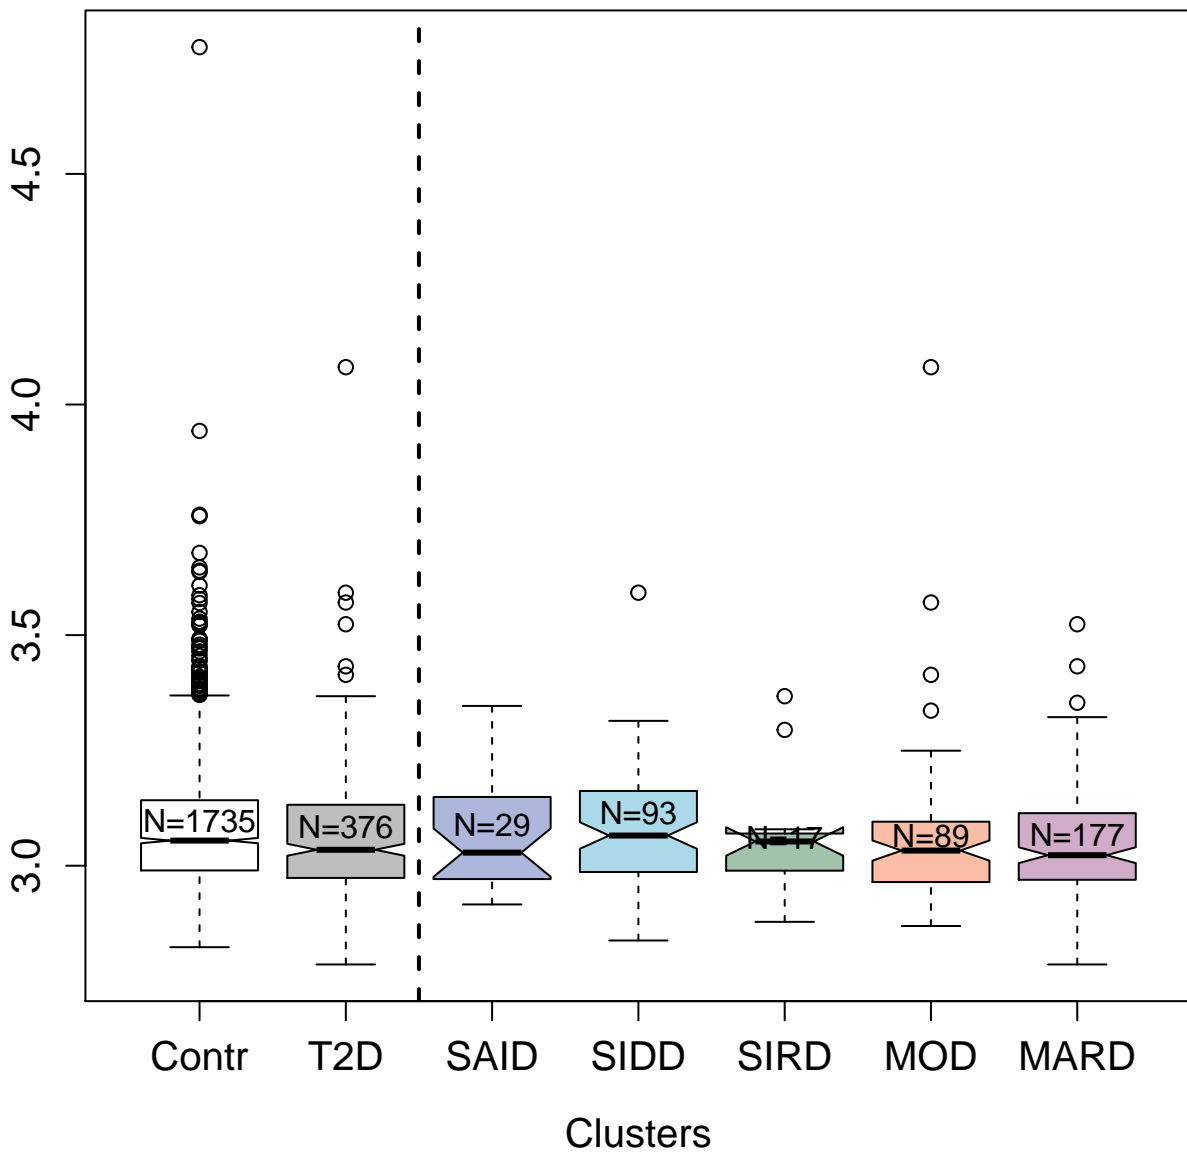

4468-21\_2 : Sphingosine kinase 2

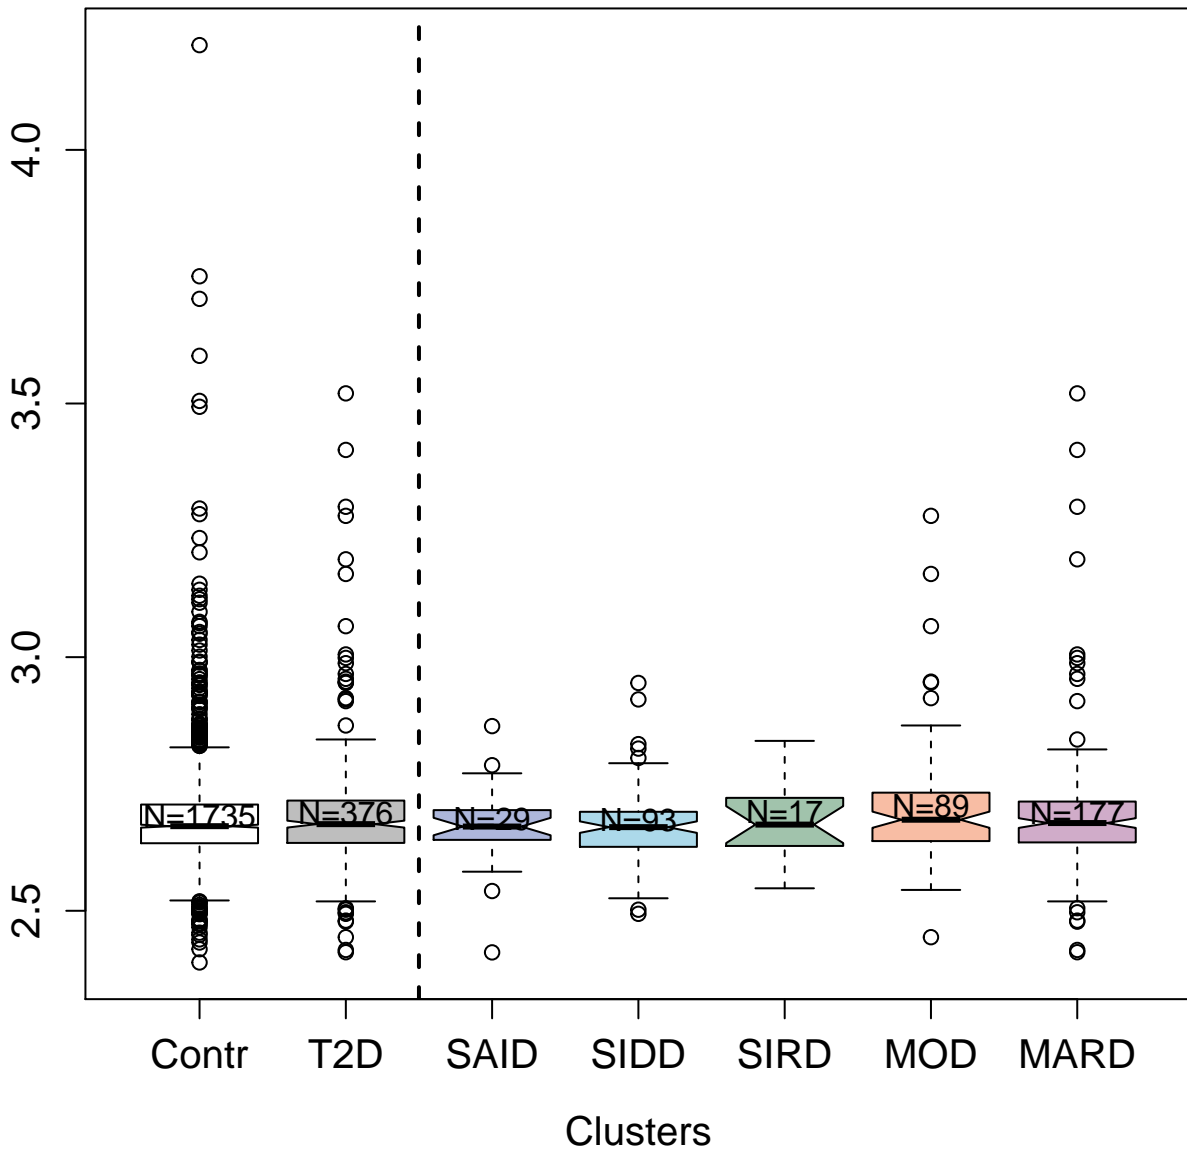

3046-31\_1 : Resistin

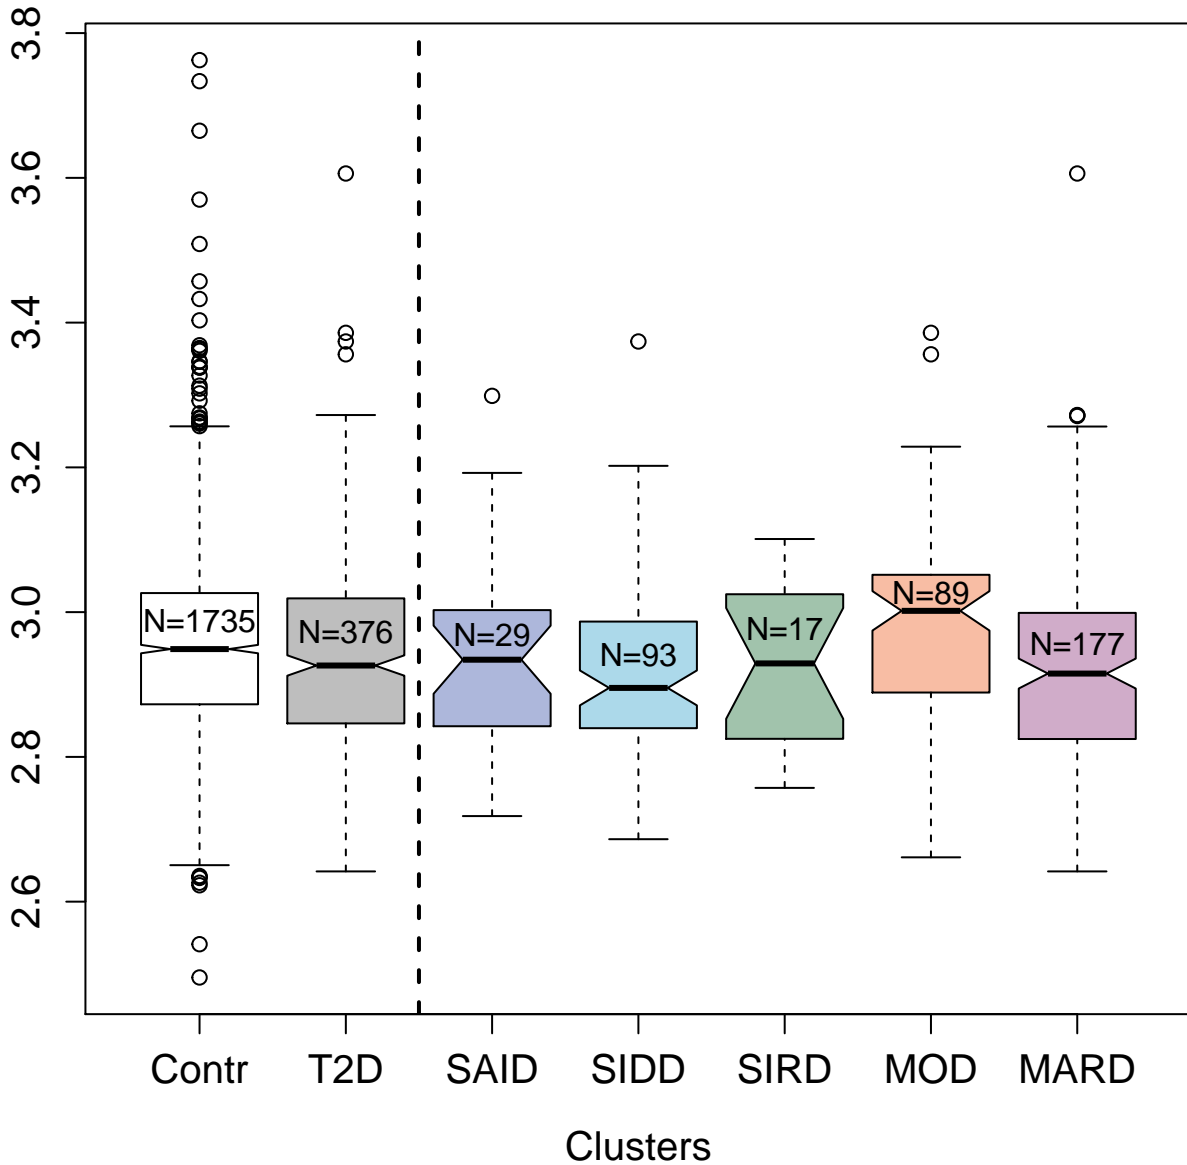

10370-21\_3 : Signal transducer and activator of transcription 1-alpha/beta

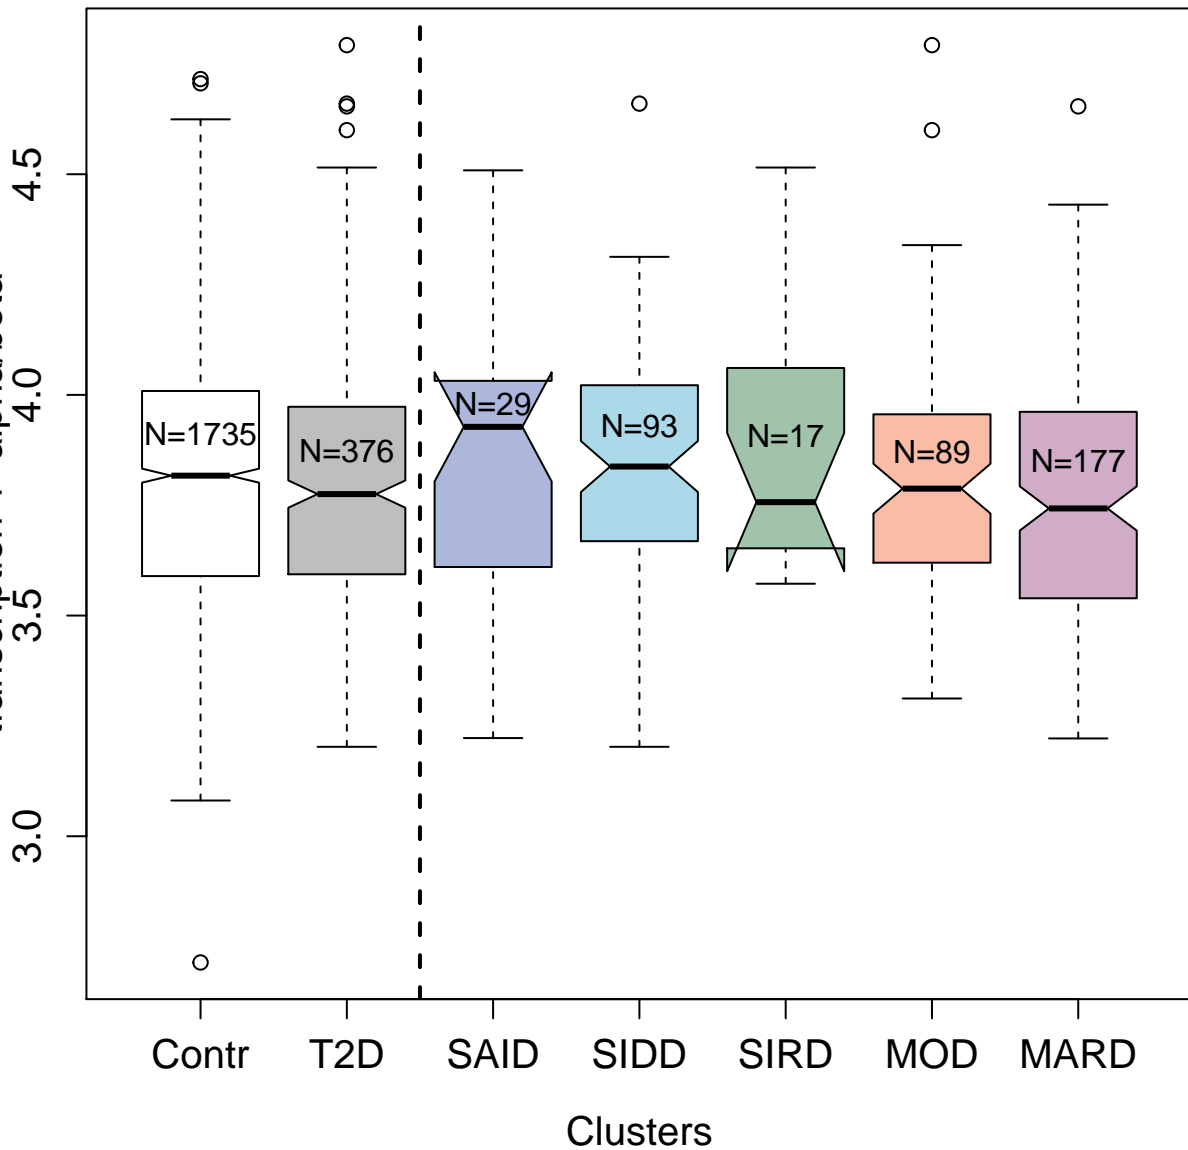

2441-2\_4 : Fibroblast growth factor 10

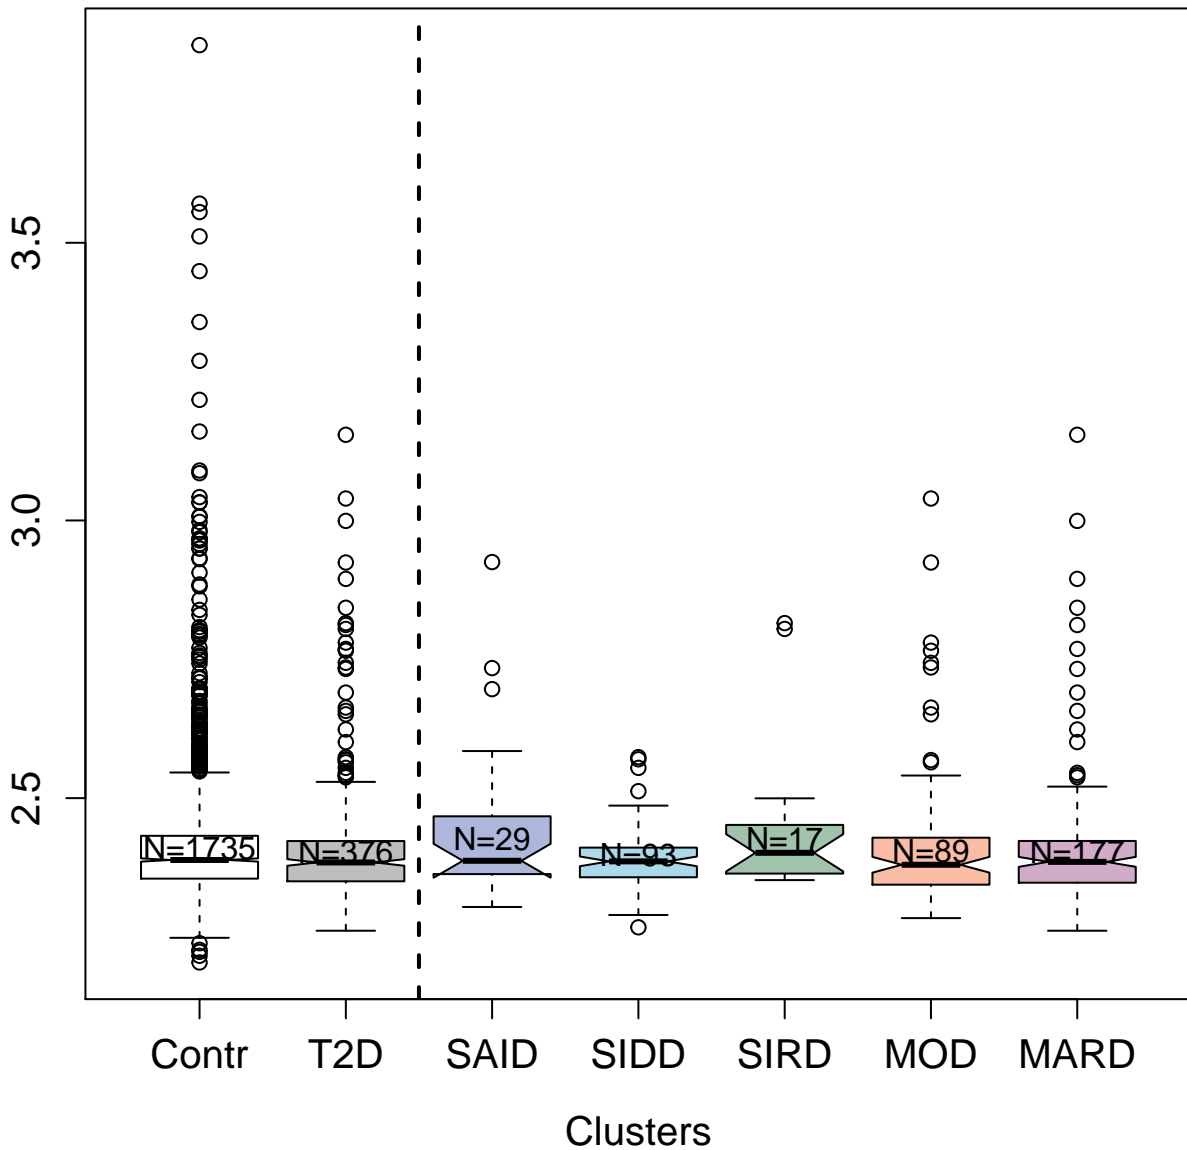



3591-51\_3 : Cadherin-6

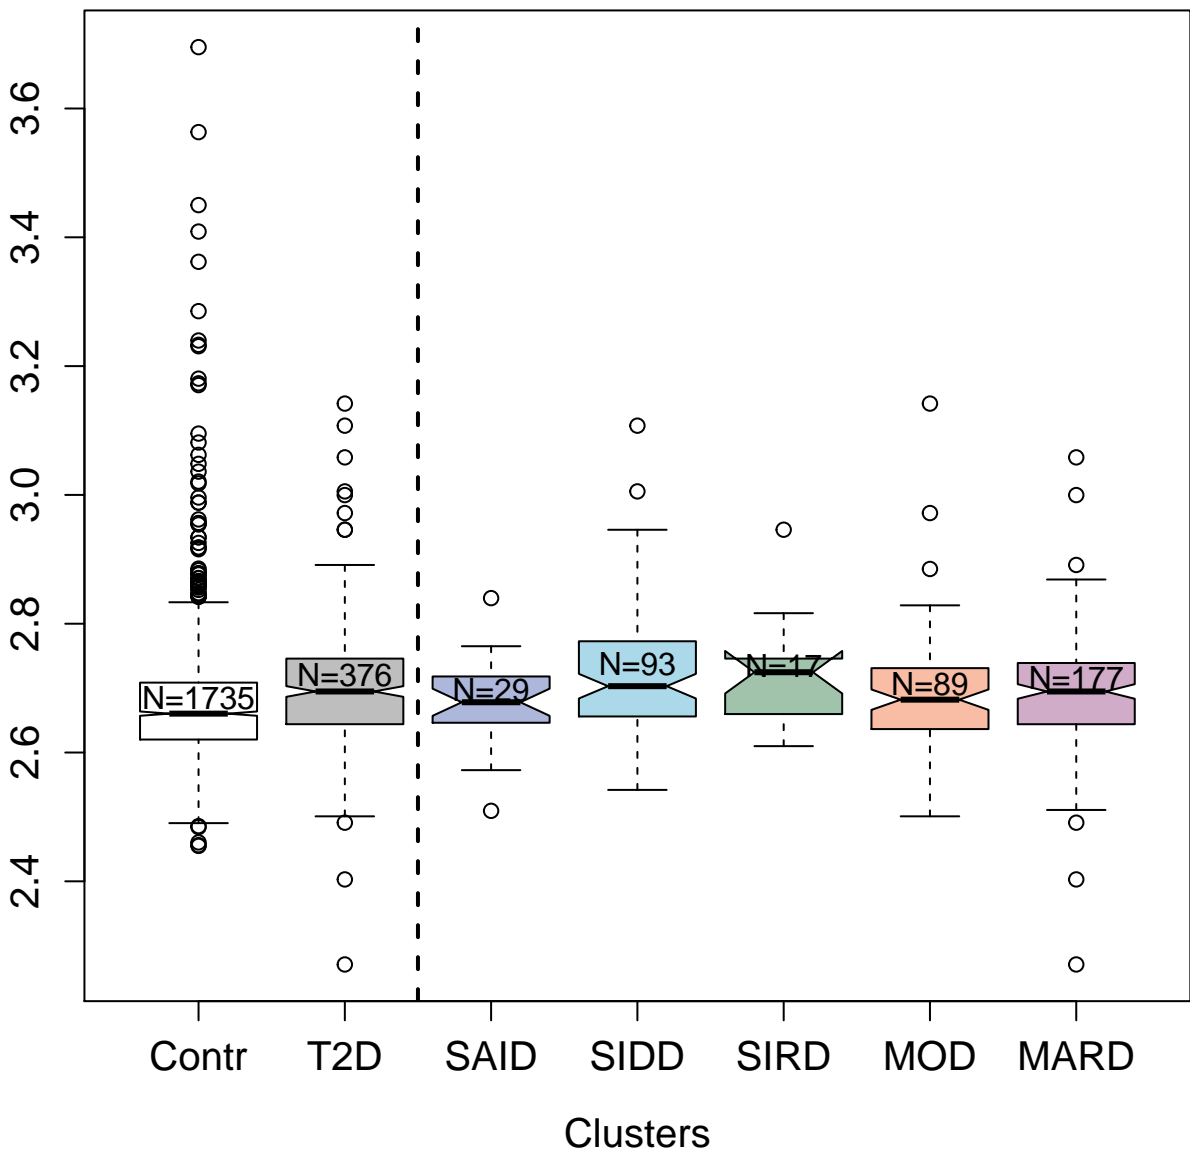

10346-5\_3 : Signal transducer and activator of transcription 3

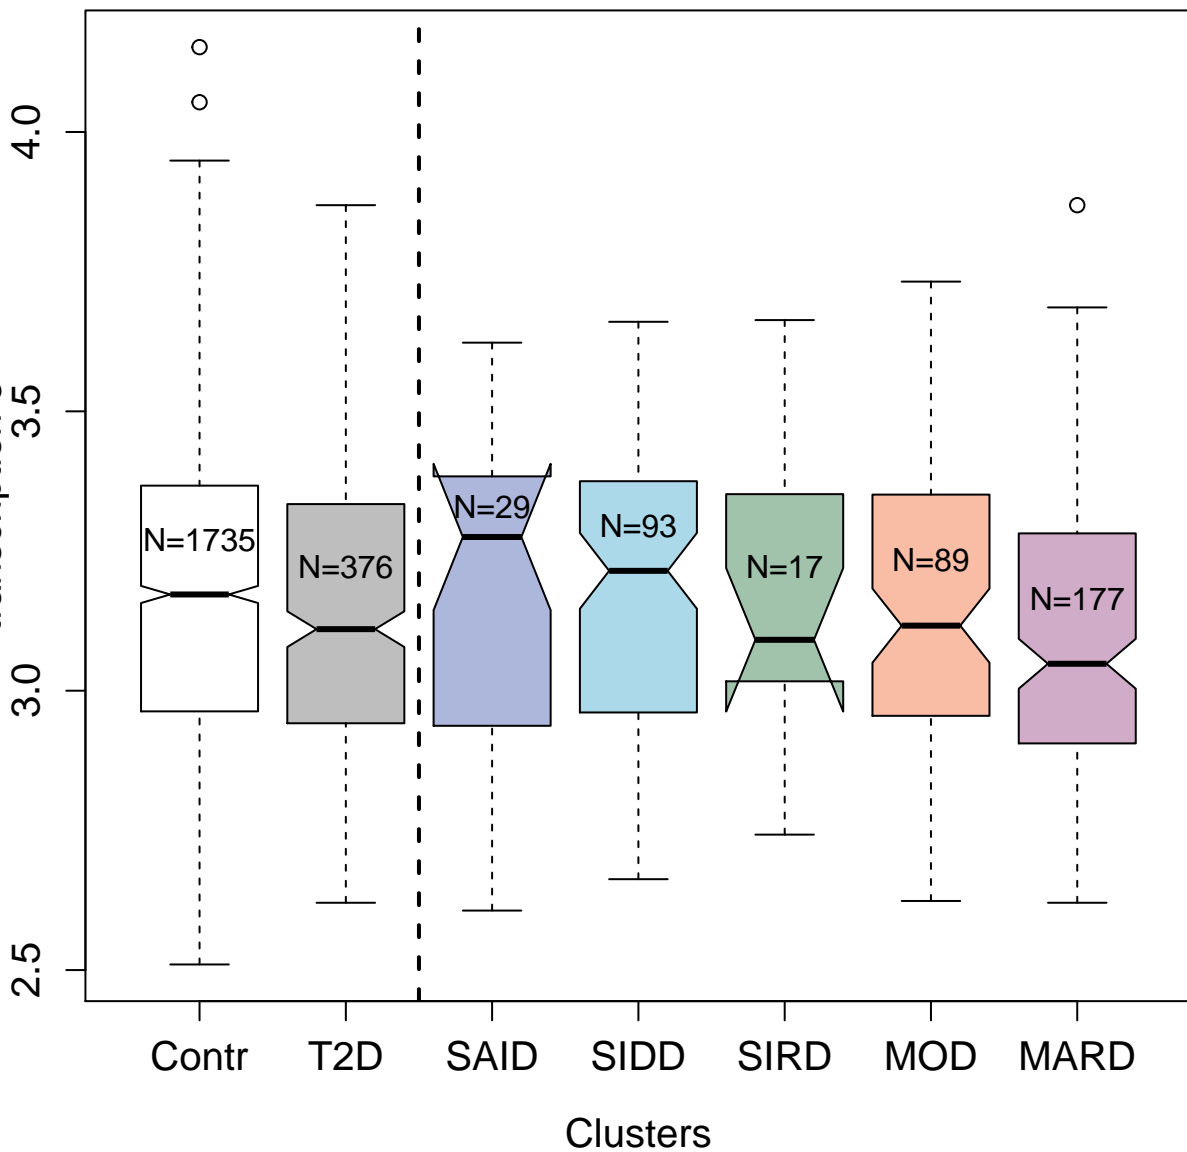

4414-69\_2 : Pulmonary surfactant-associated protein D

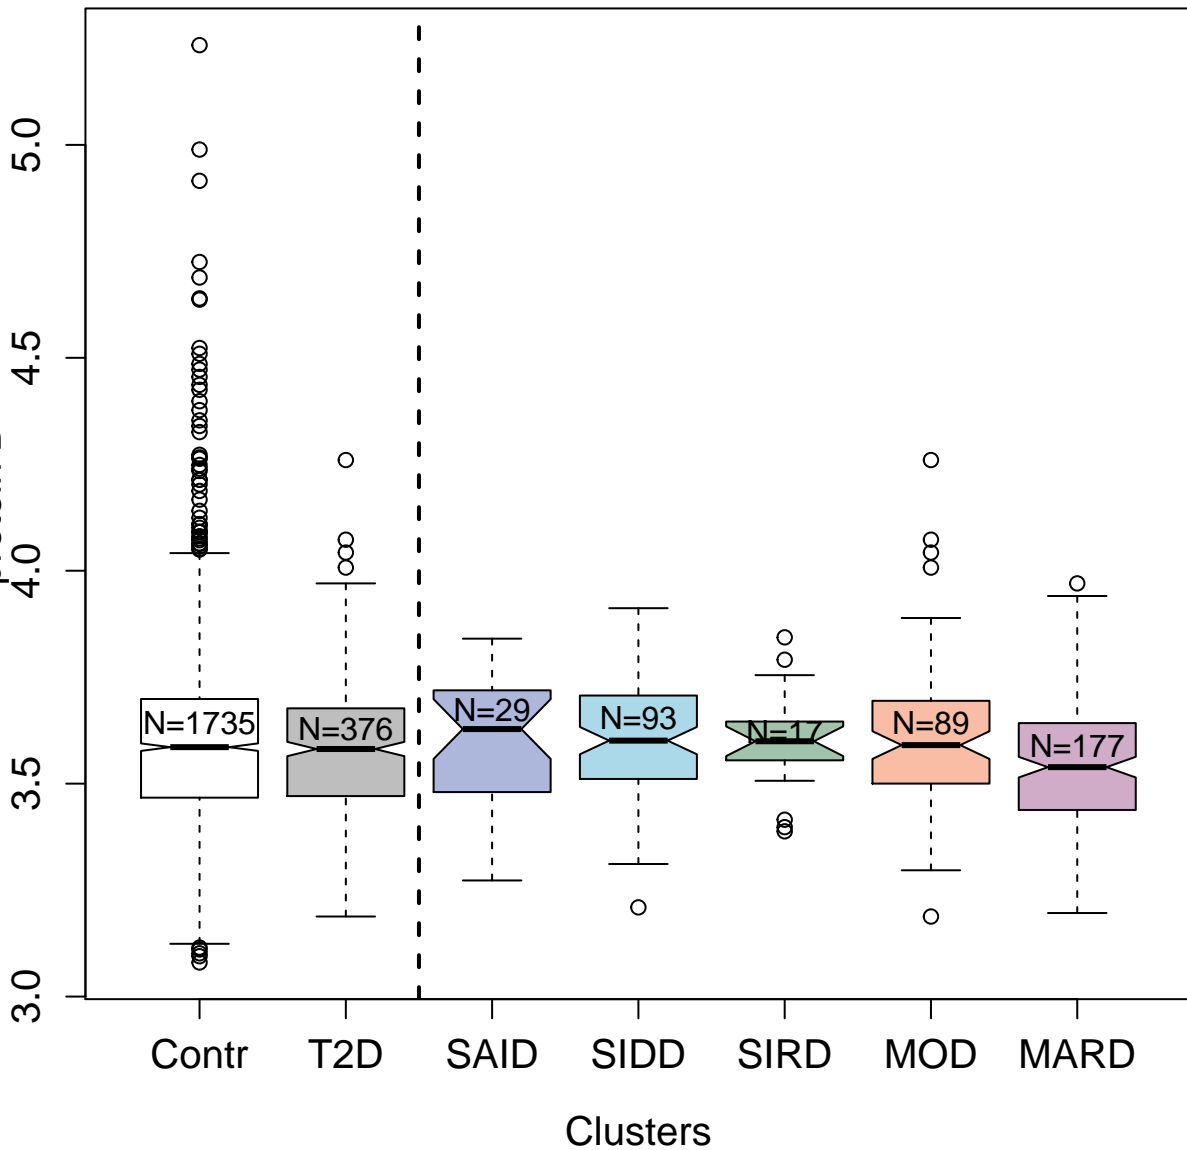

4179-57\_3 : 14-3-3 protein family

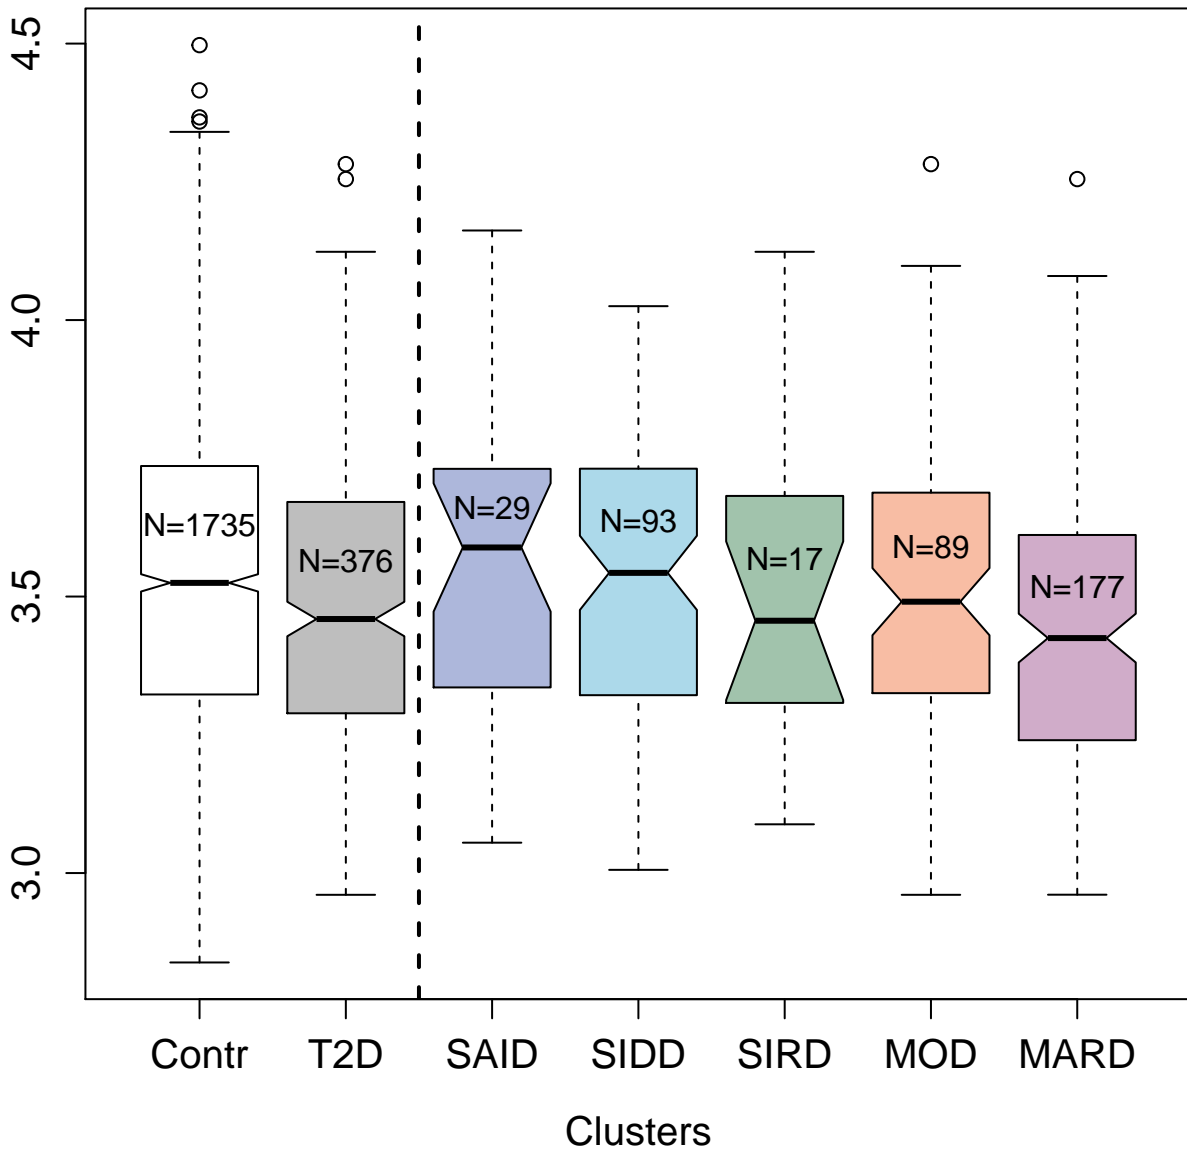

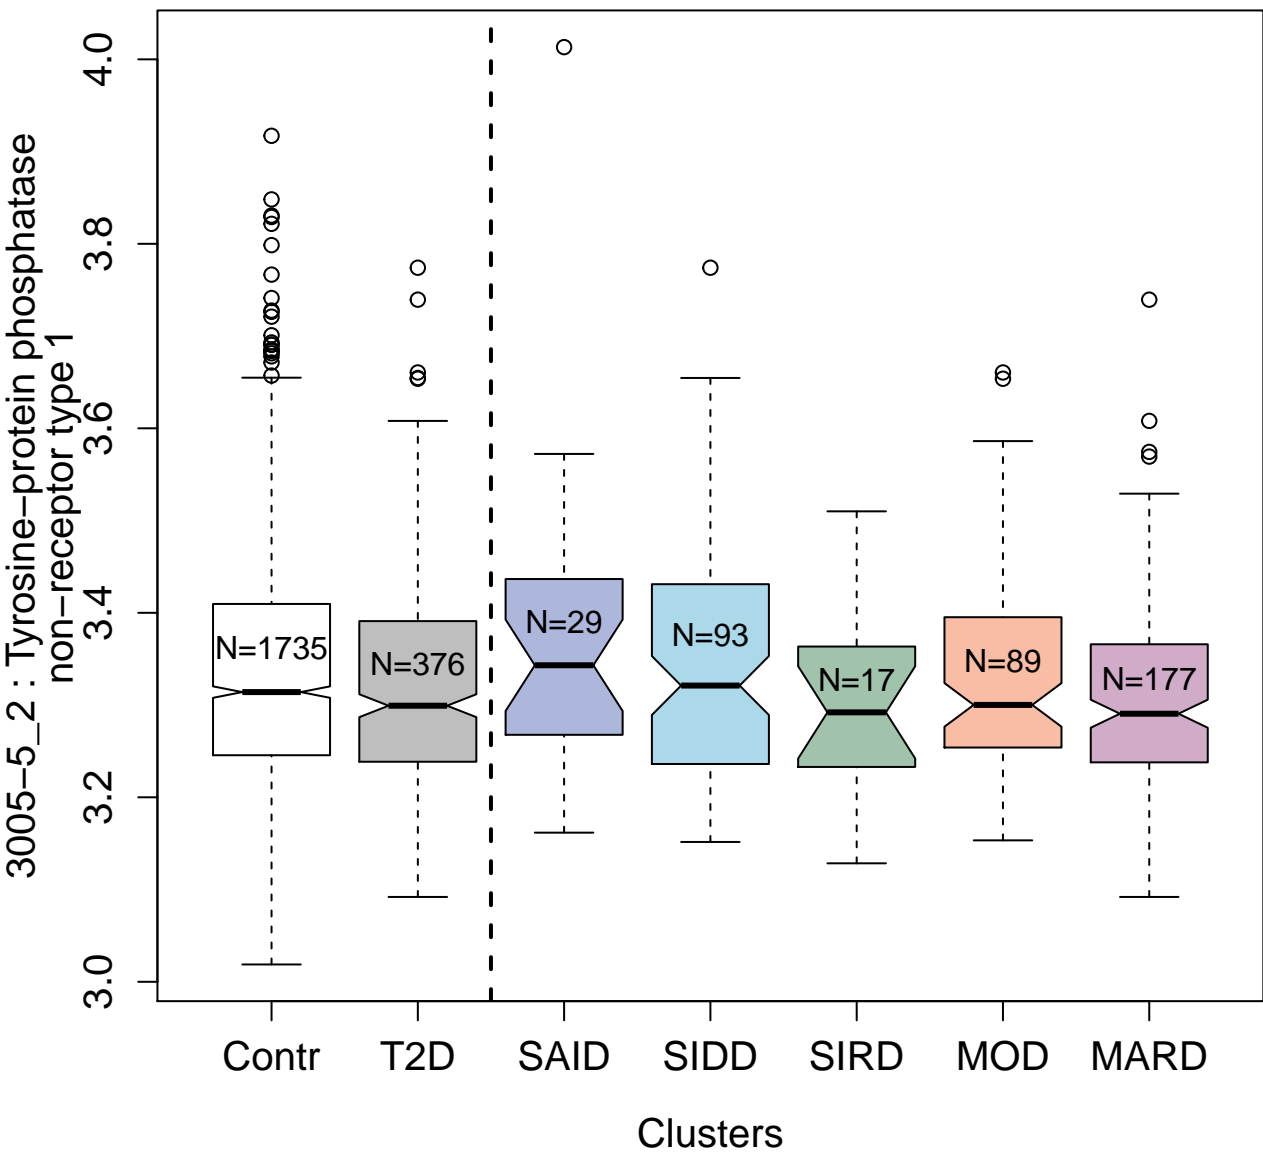

10336-3\_3 : E3 ubiquitin-protein ligase CHIP

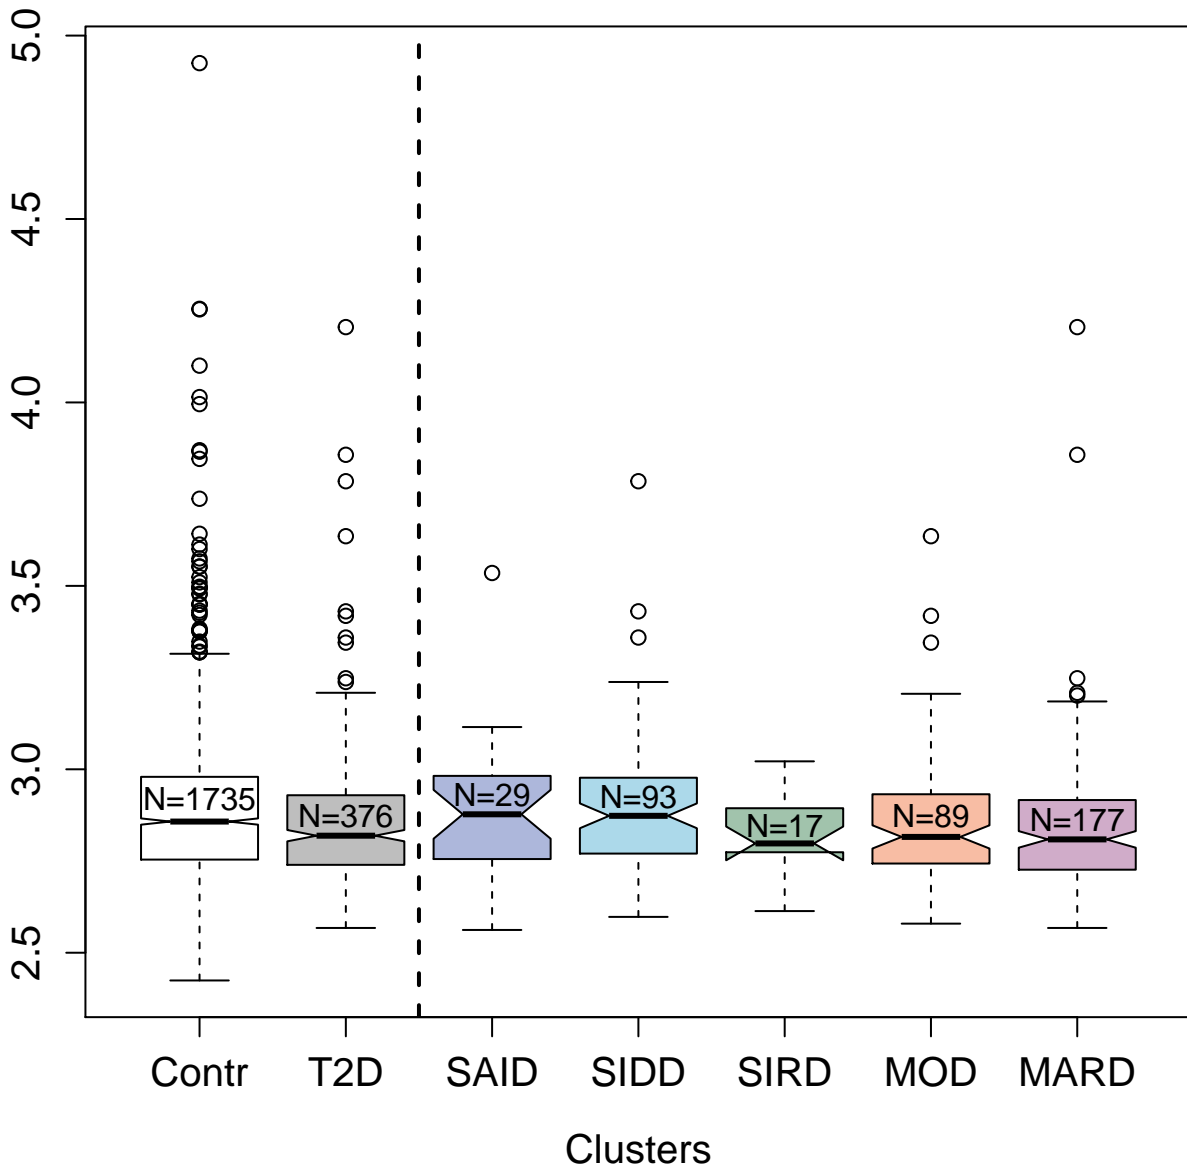

2654-19\_1 : Tumor necrosis factor receptor  
superfamily member 1A

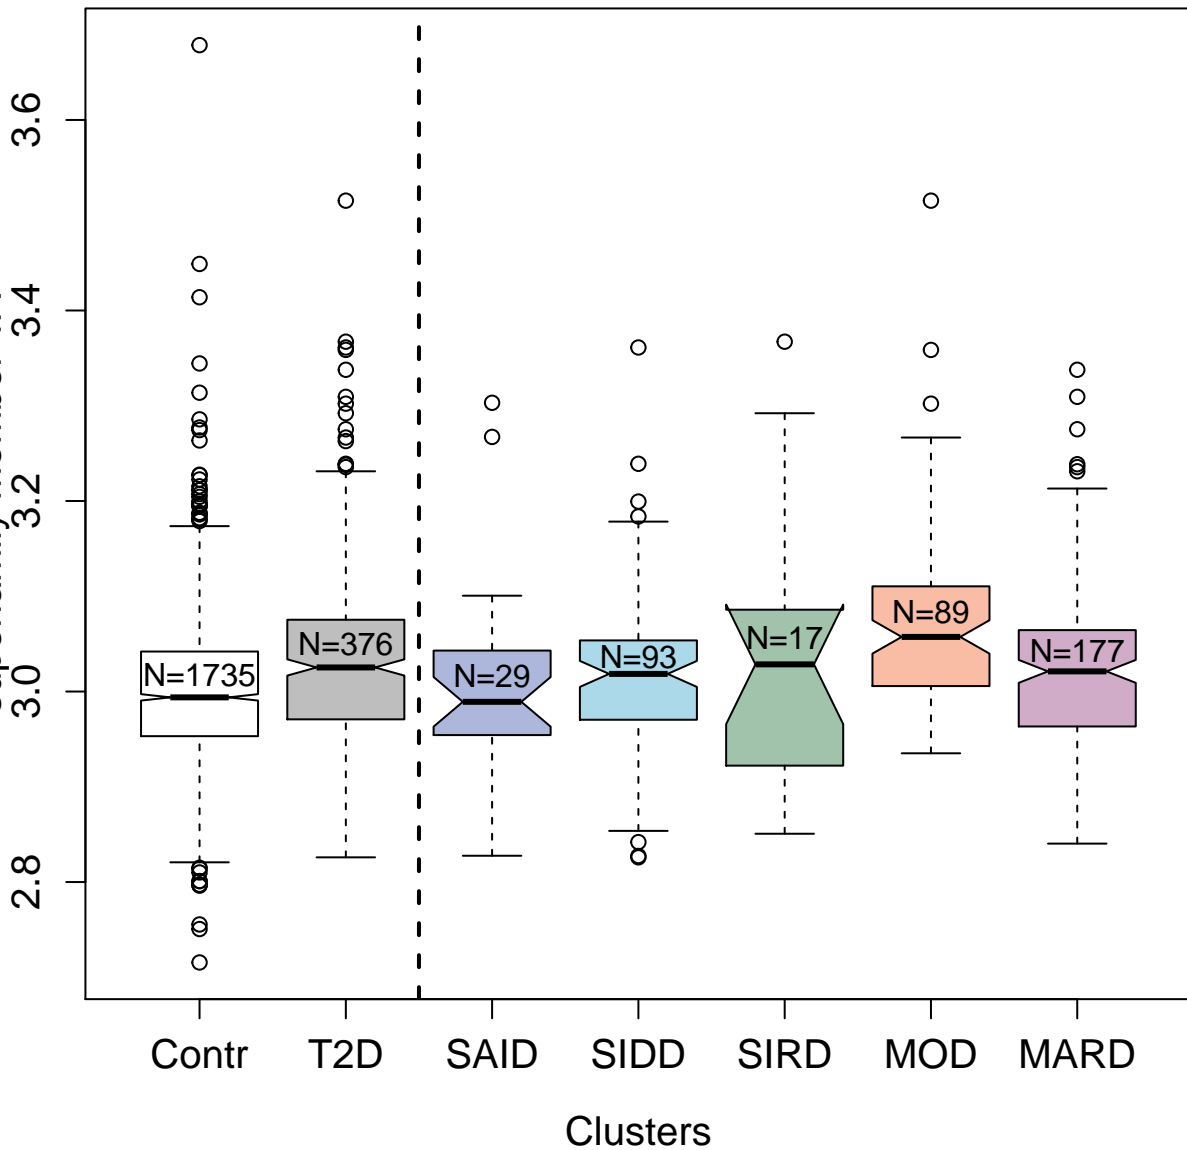

2816-50\_2 : Basal Cell Adhesion Molecule

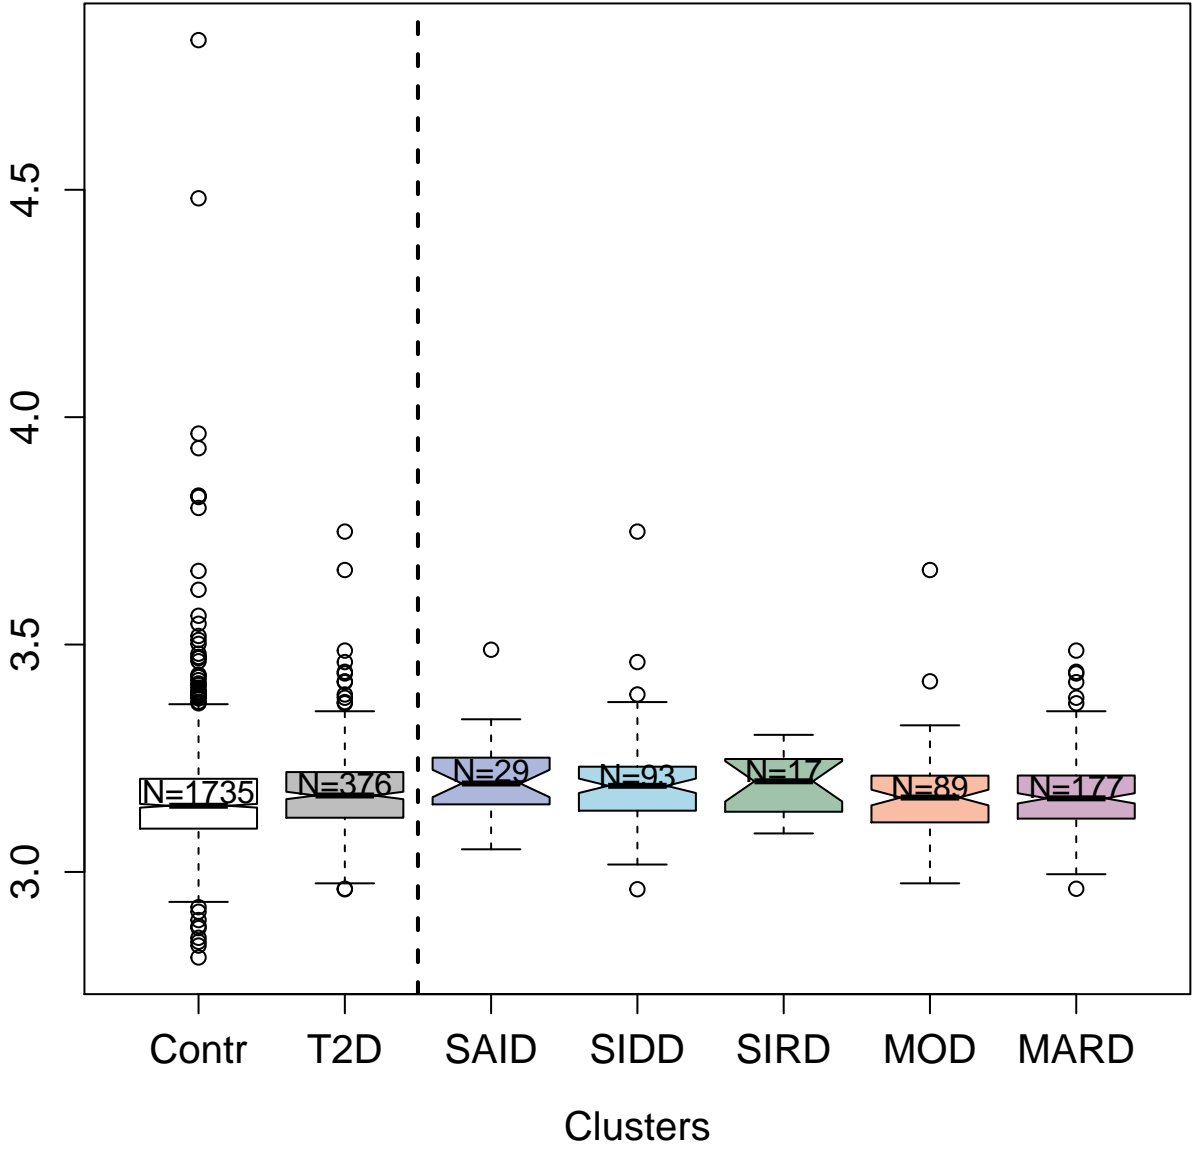



5076-53\_2 : Ephrin type-A receptor 10

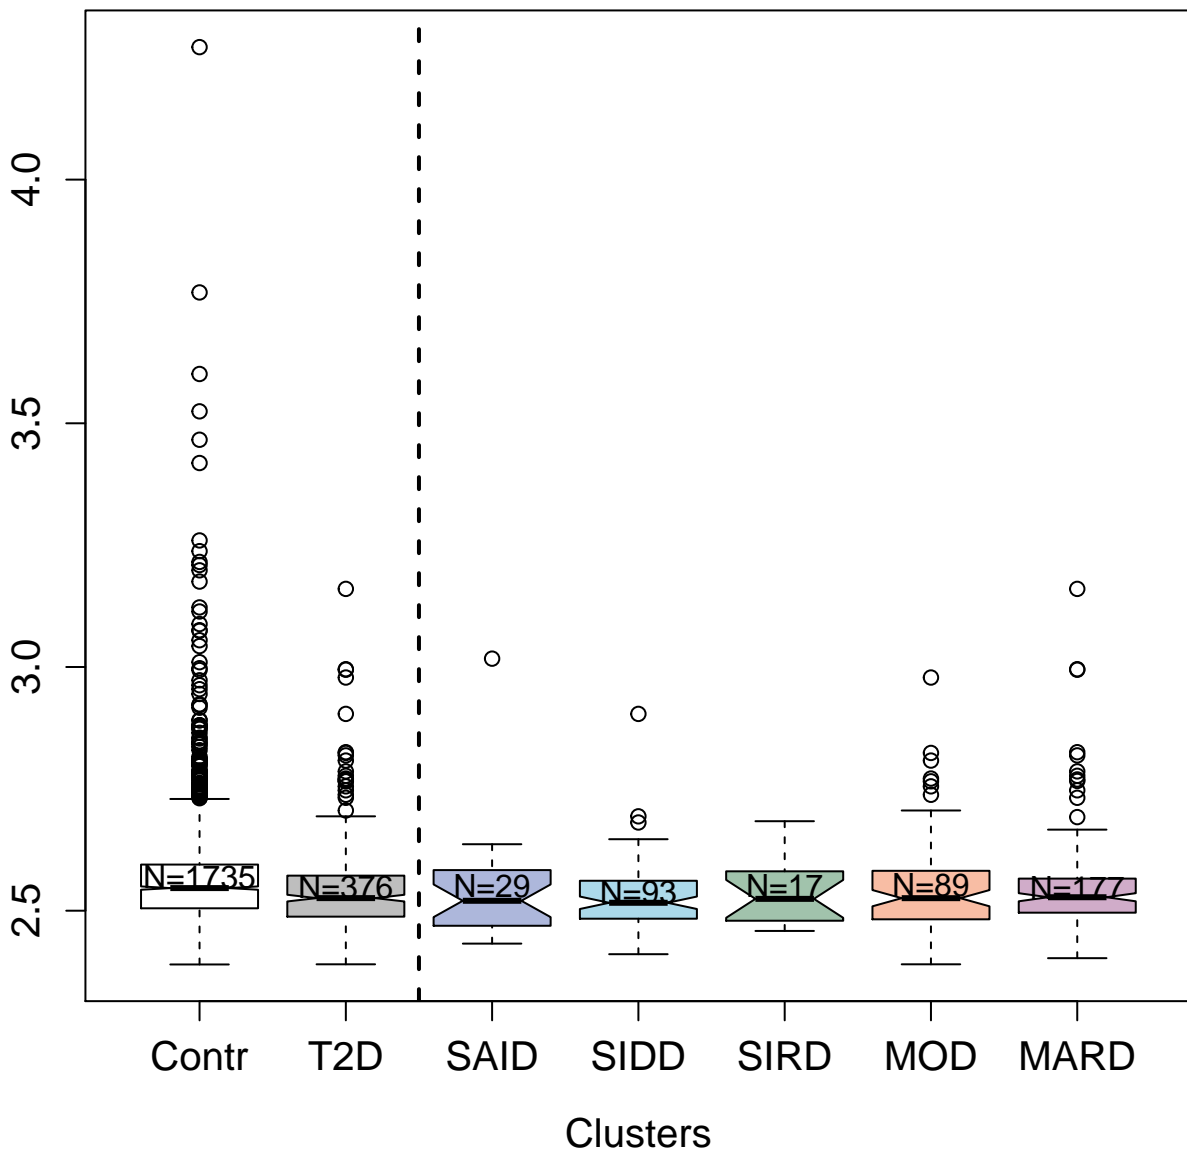

4907-56\_1 : D-dimer

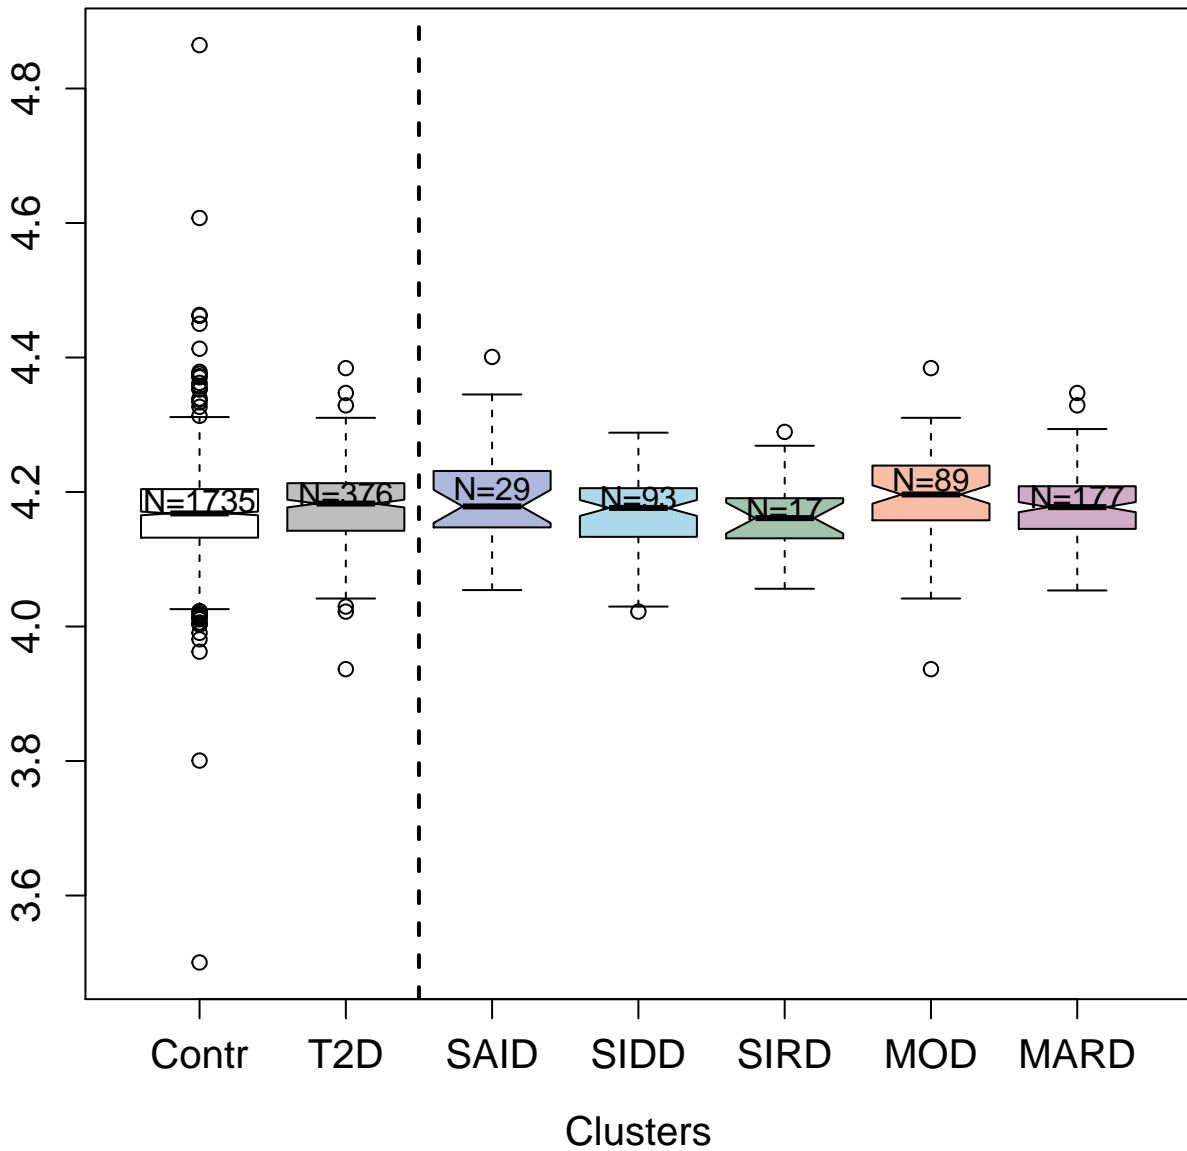

4556-10\_2 : Interleukin-34

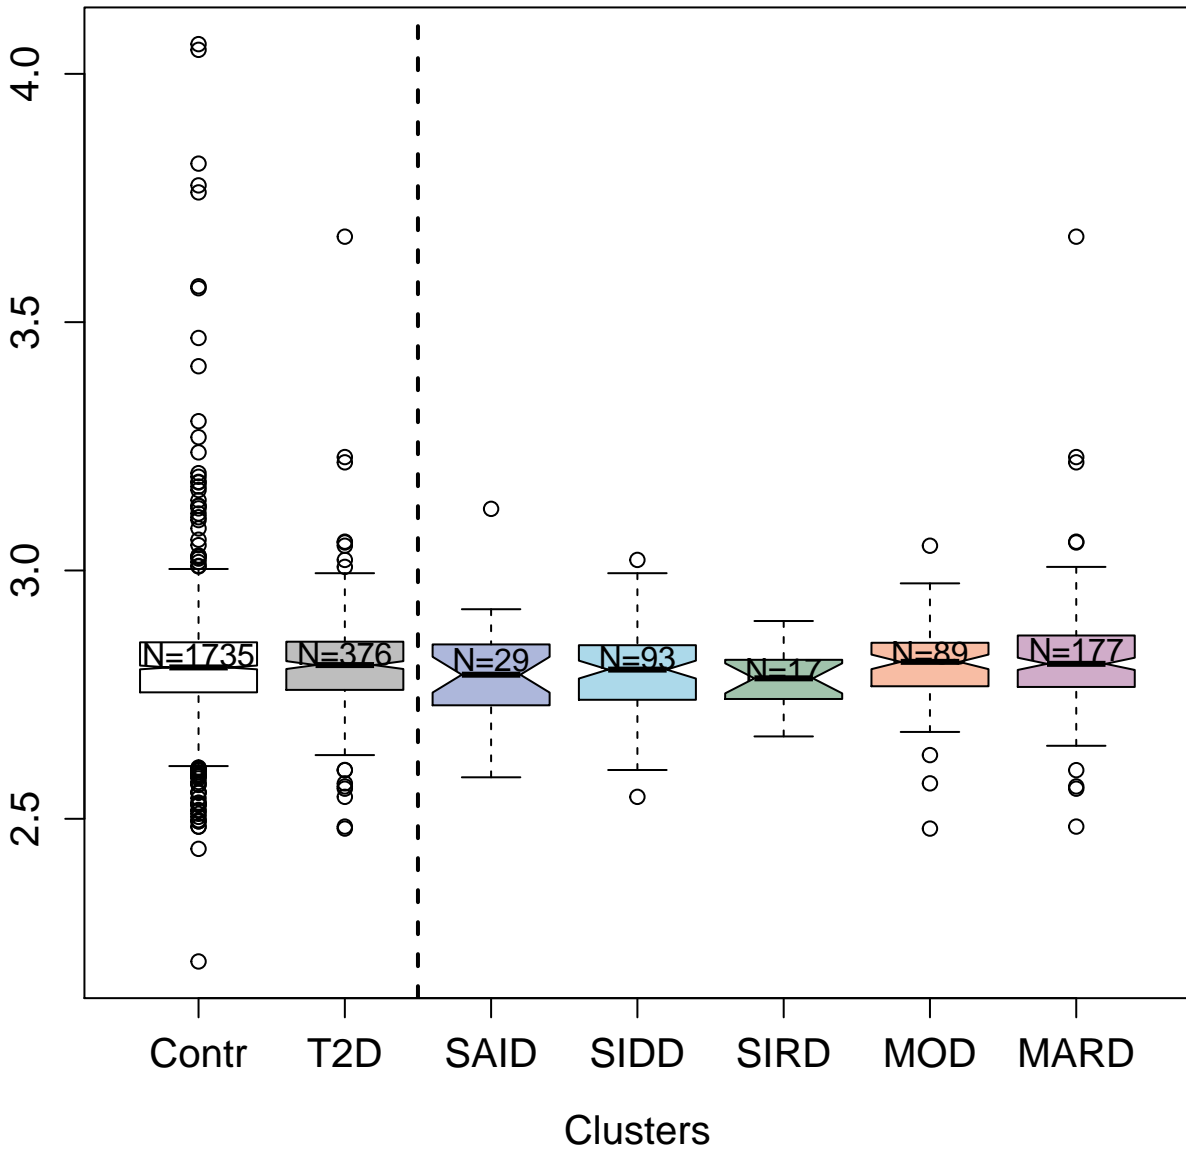

3232-28\_2 : Tartrate-resistant acid phosphatase  
type 5

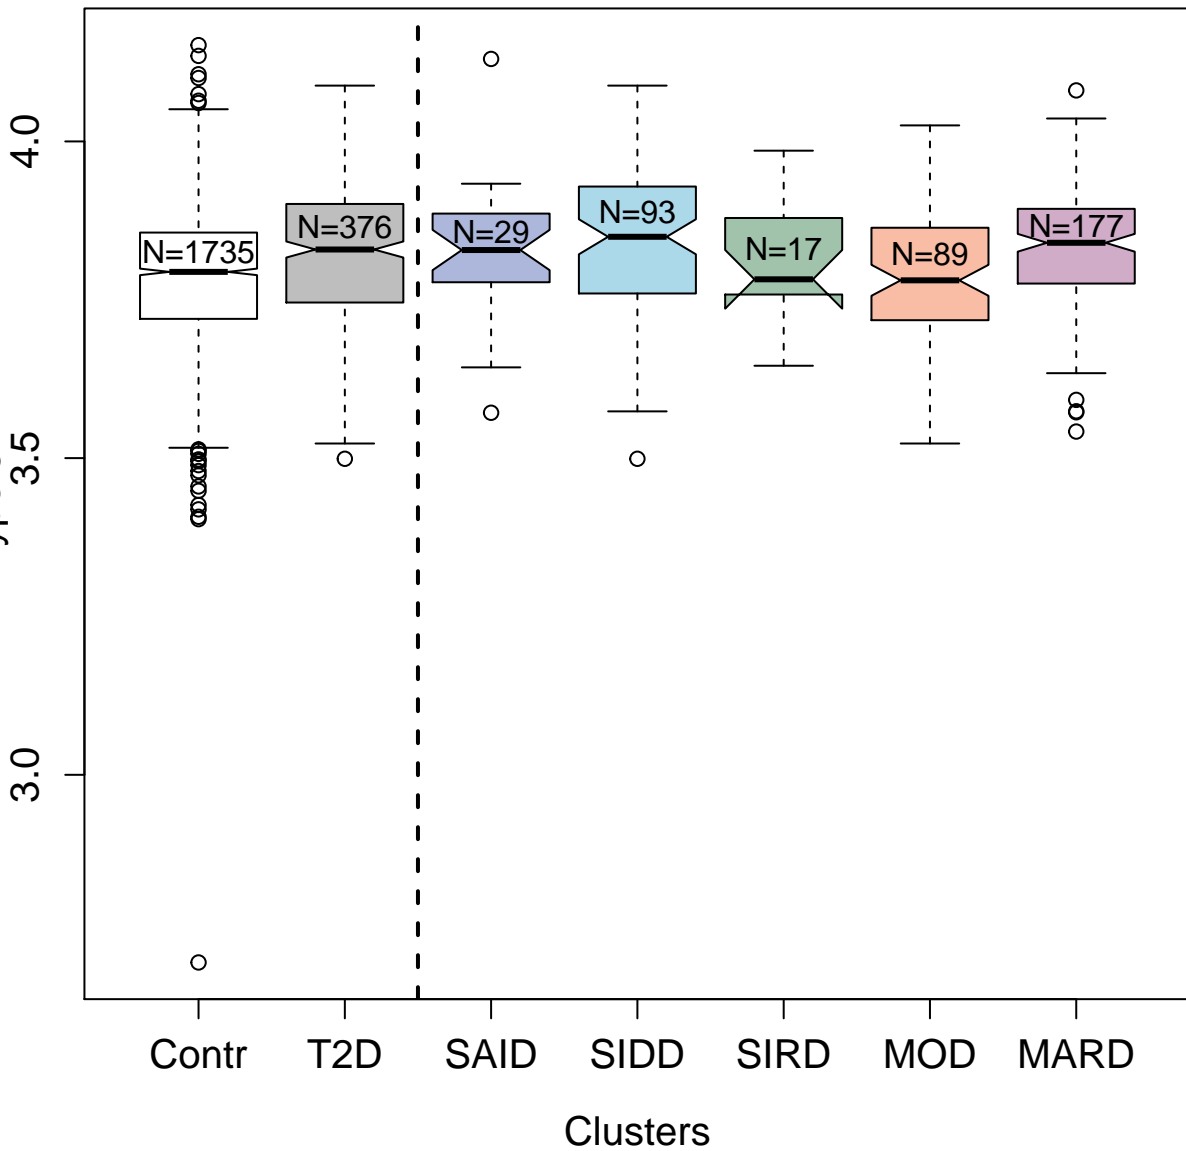

3488-64\_2 : Catalase

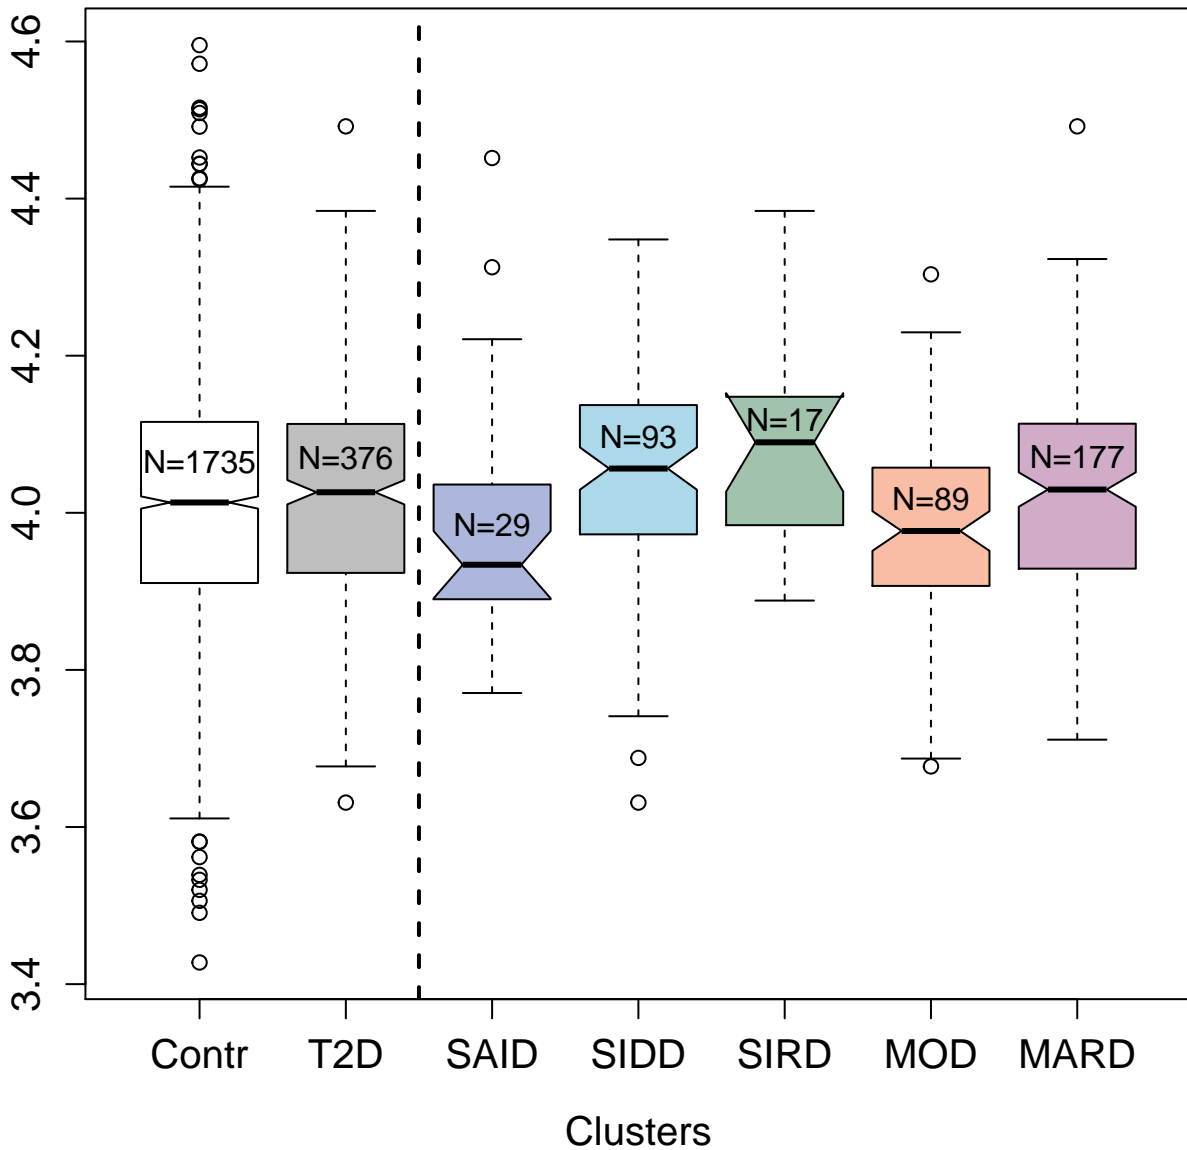

5088-175\_3 : Interleukin-23 receptor

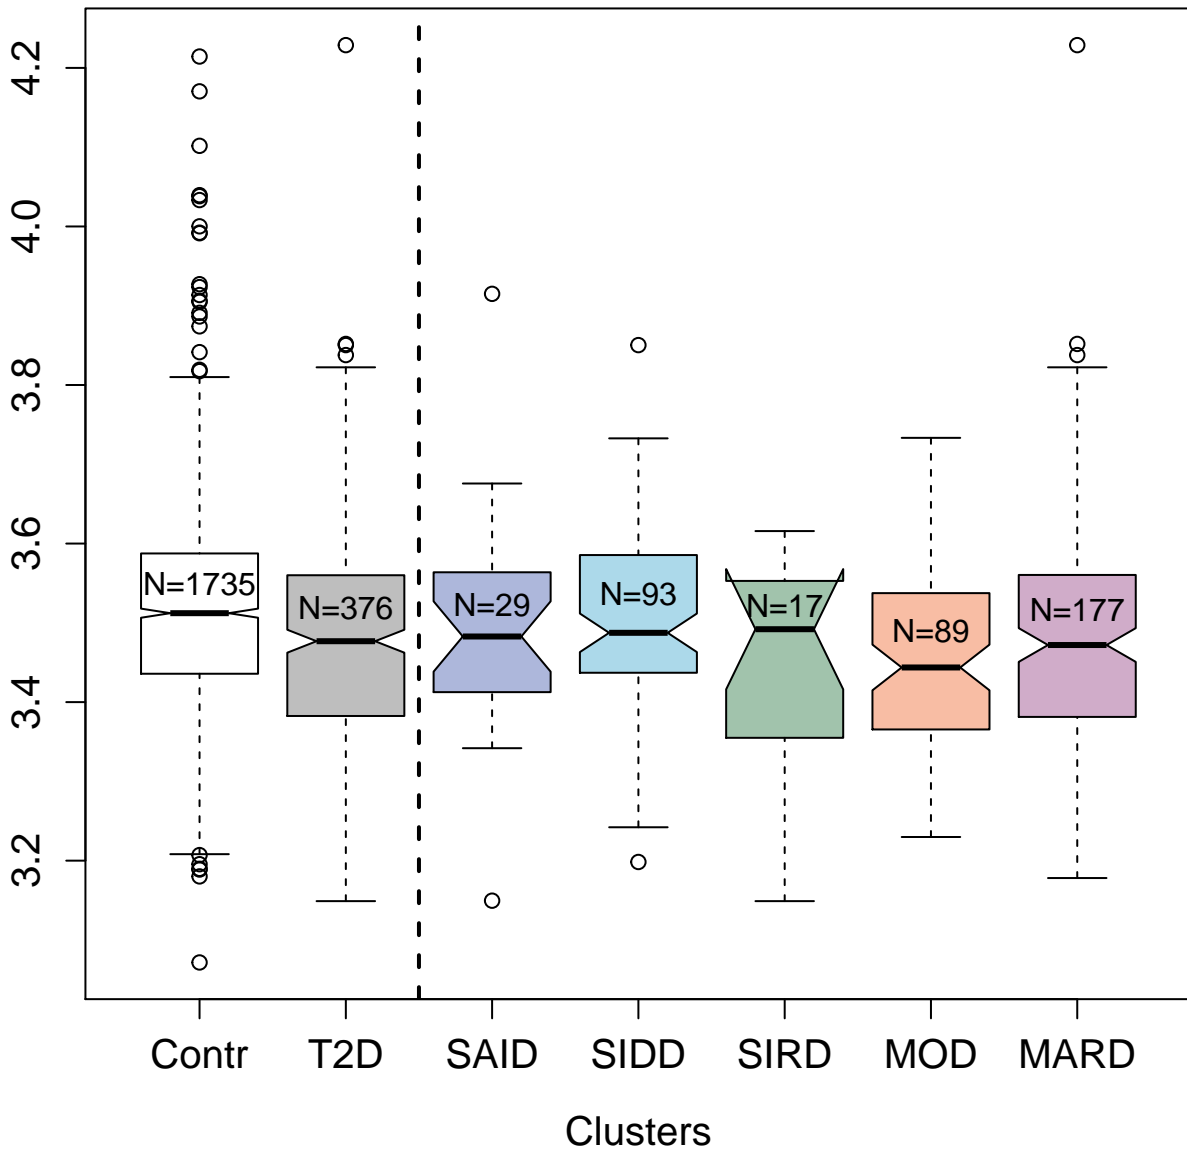

2644-11\_2 : Protein kinase C alpha type

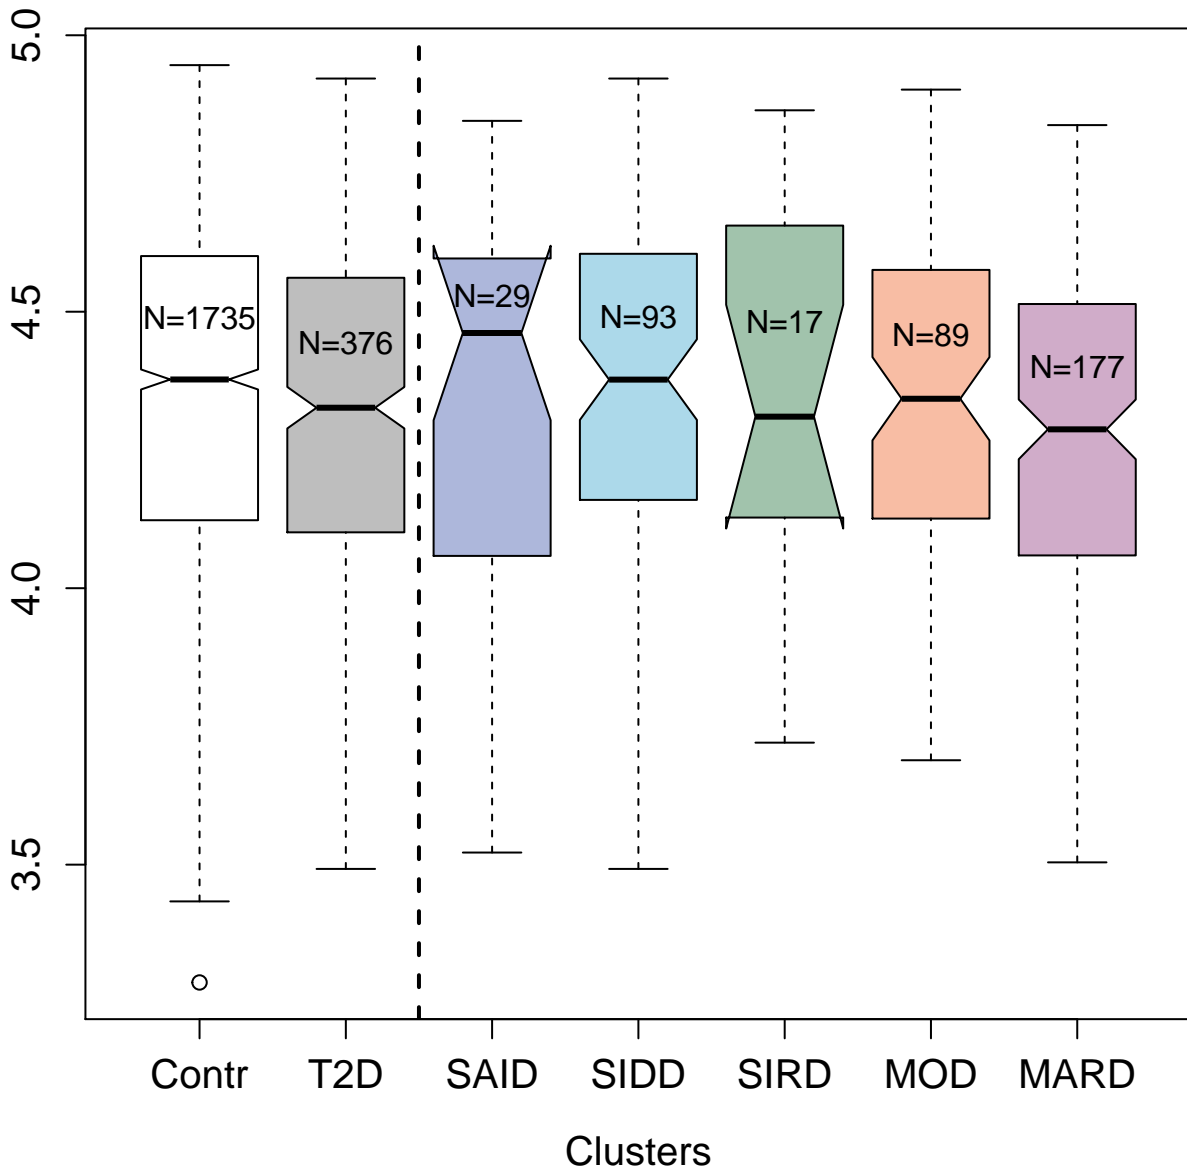

2828-82\_2 : Kunitz-type protease inhibitor 1

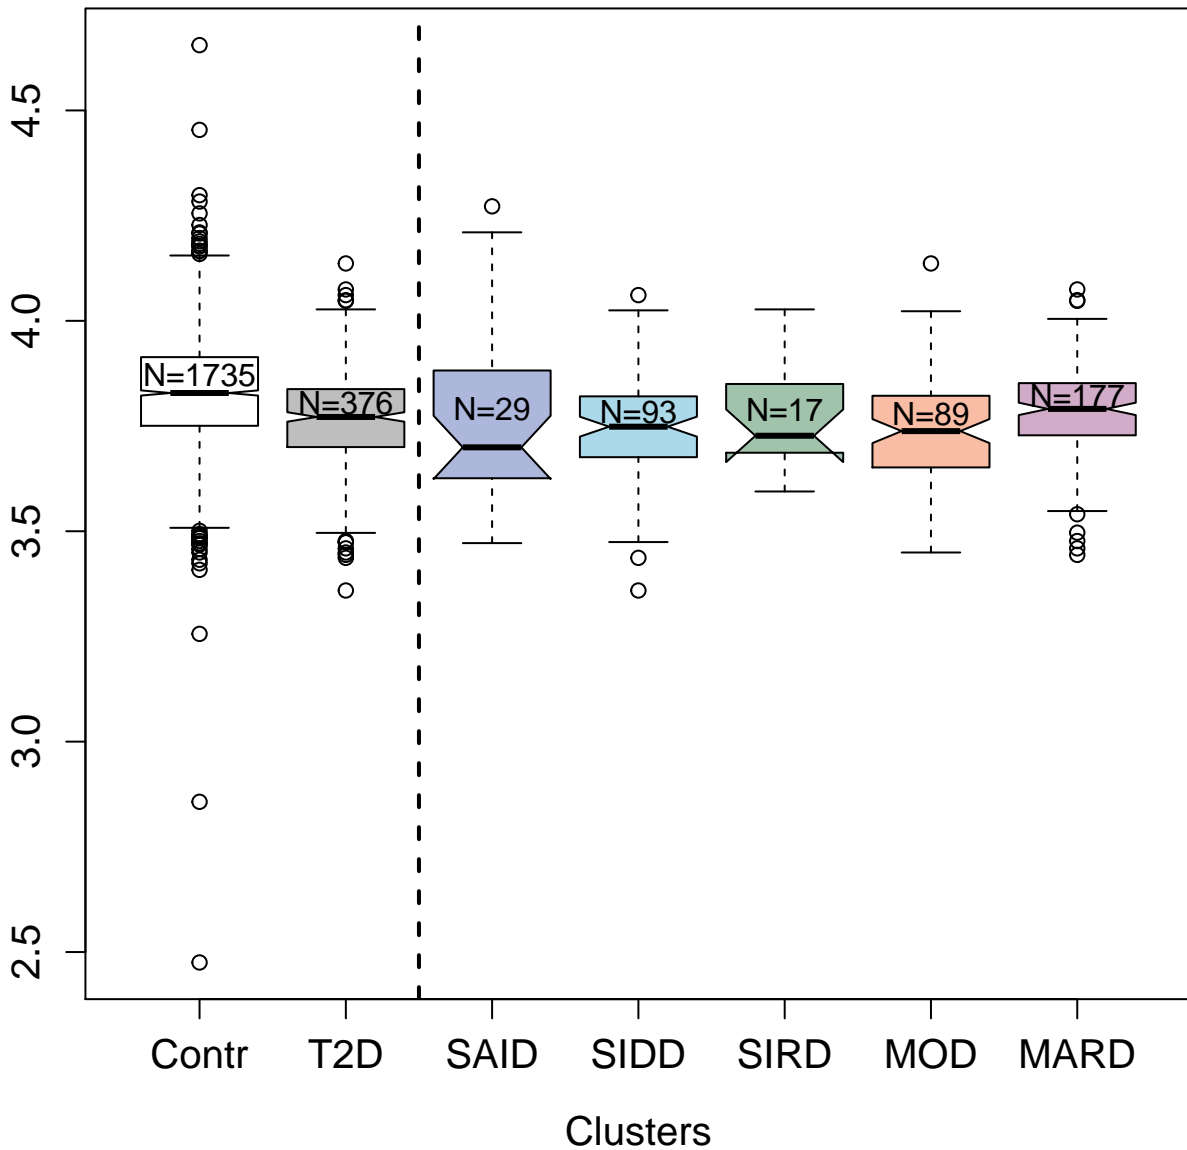



4929-55\_1 : Sex hormone-binding globulin

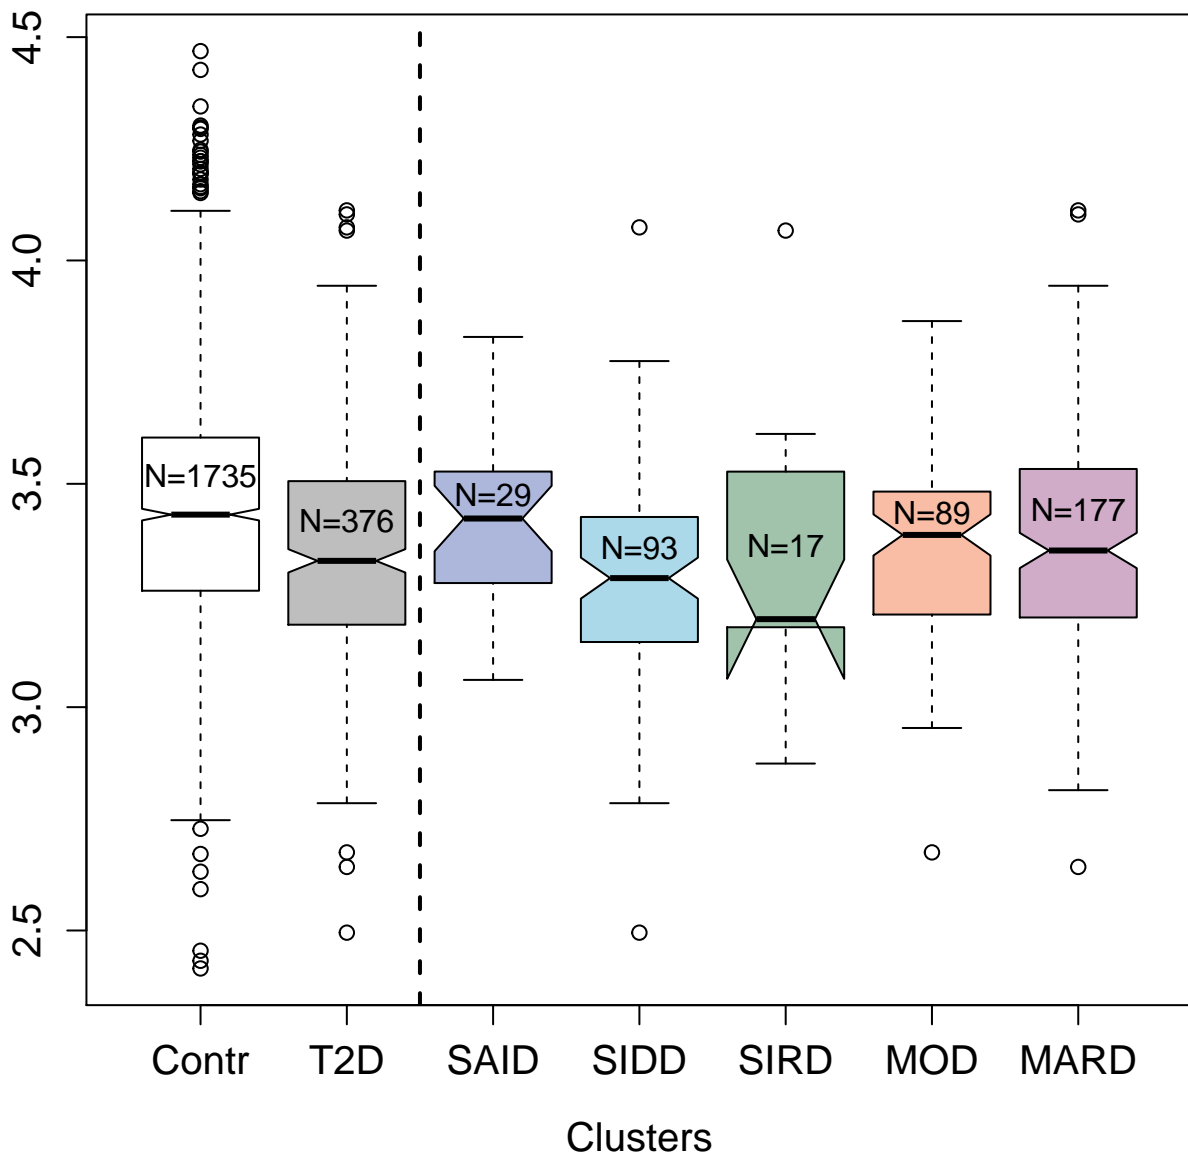

5430-66\_3 : Tyrosine-protein phosphatase  
non-receptor type substrate 1

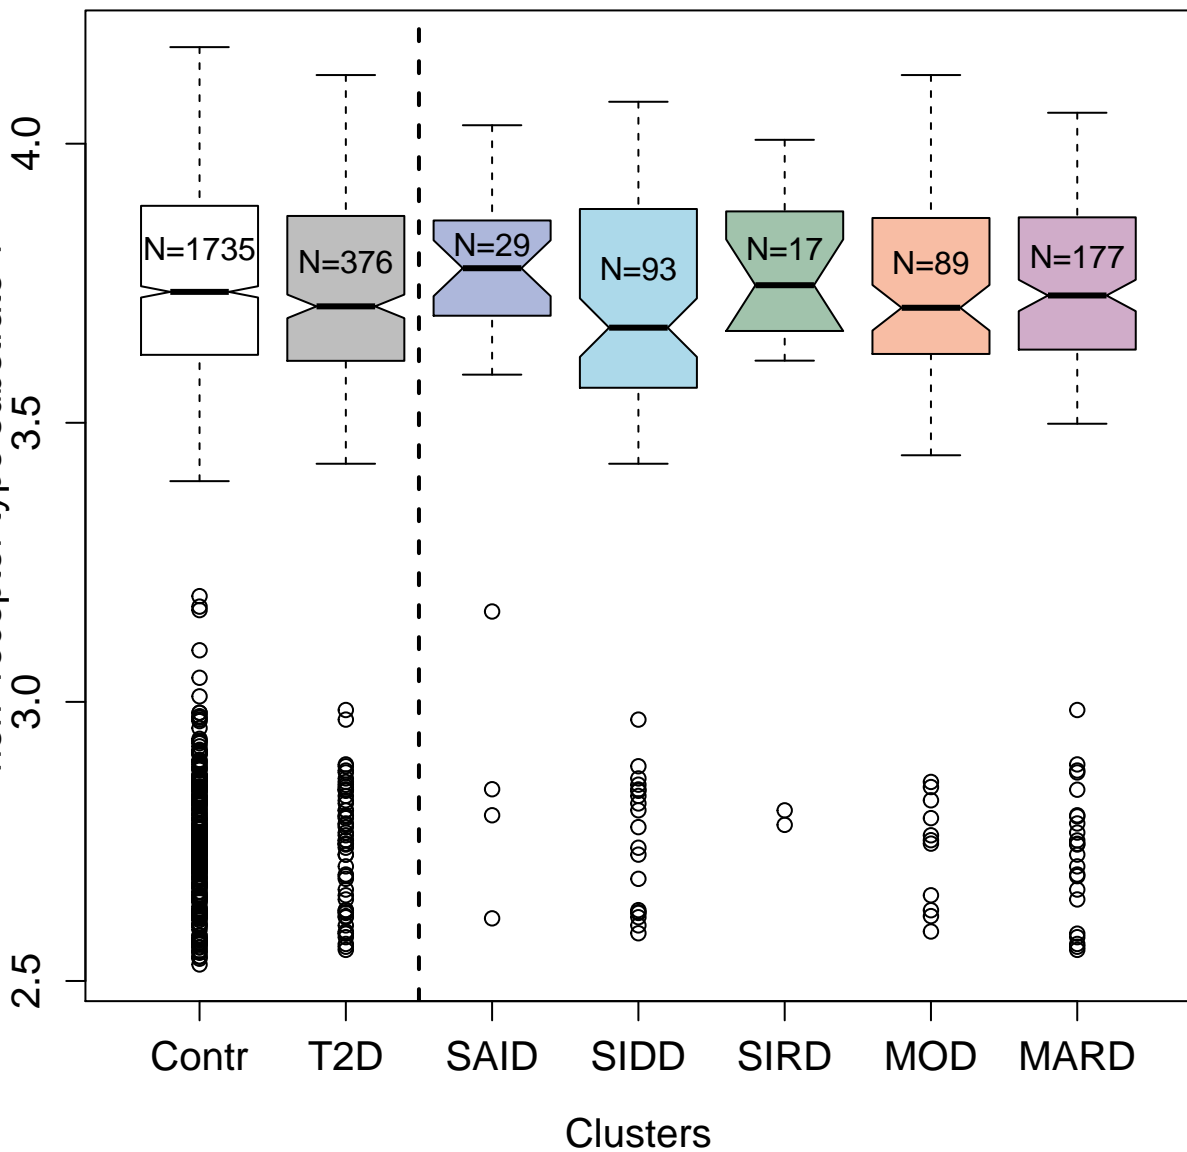

4261-55\_2 : Serum paraoxonase/arylesterase 1

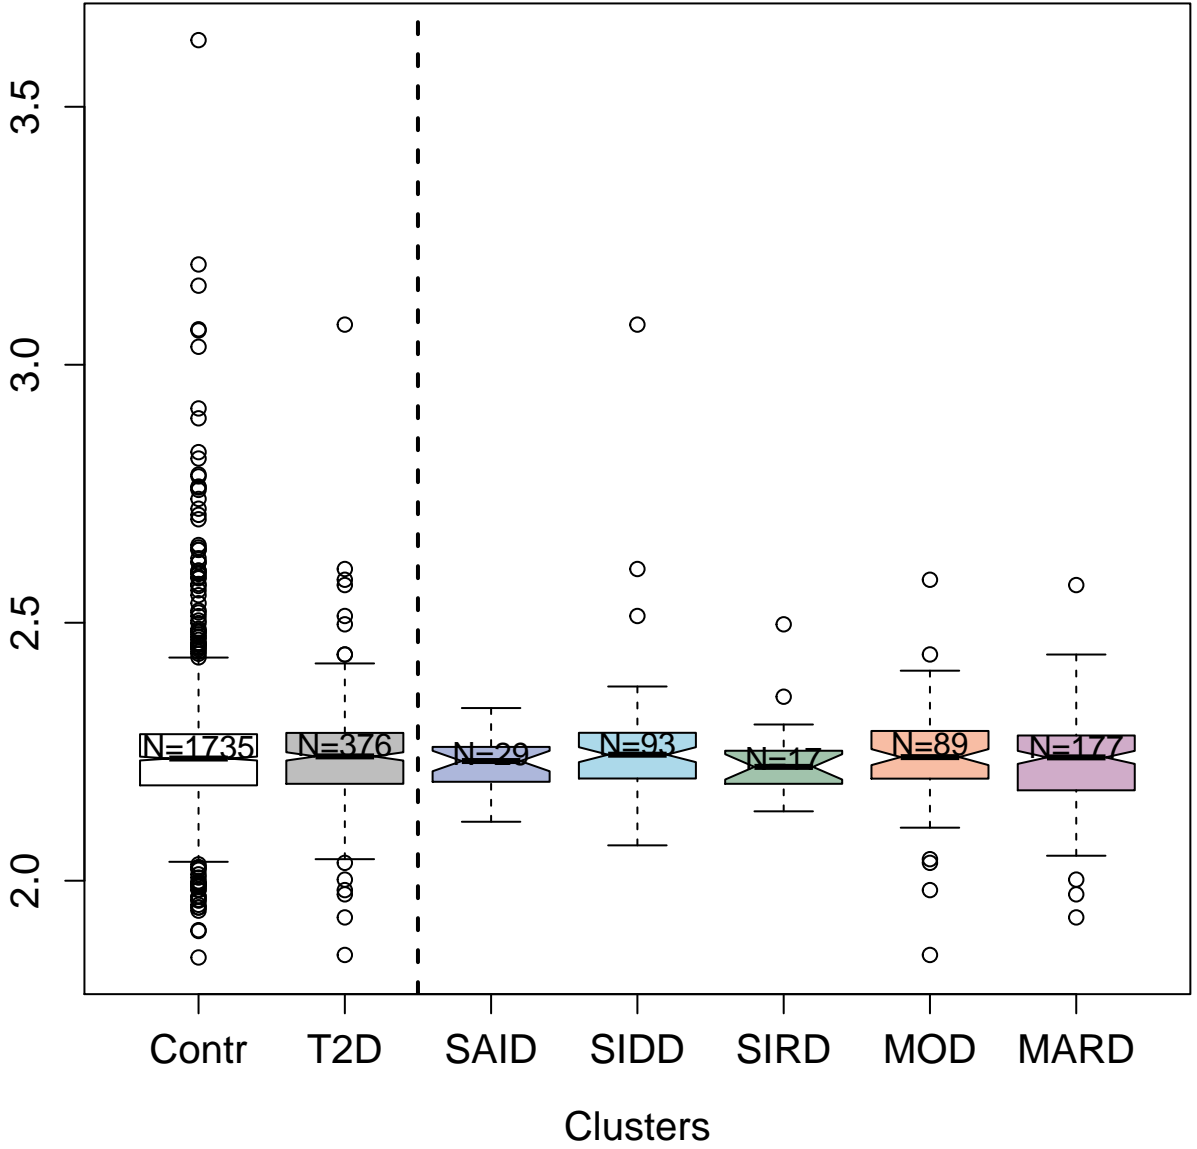

5346-24\_3 : Copine-1

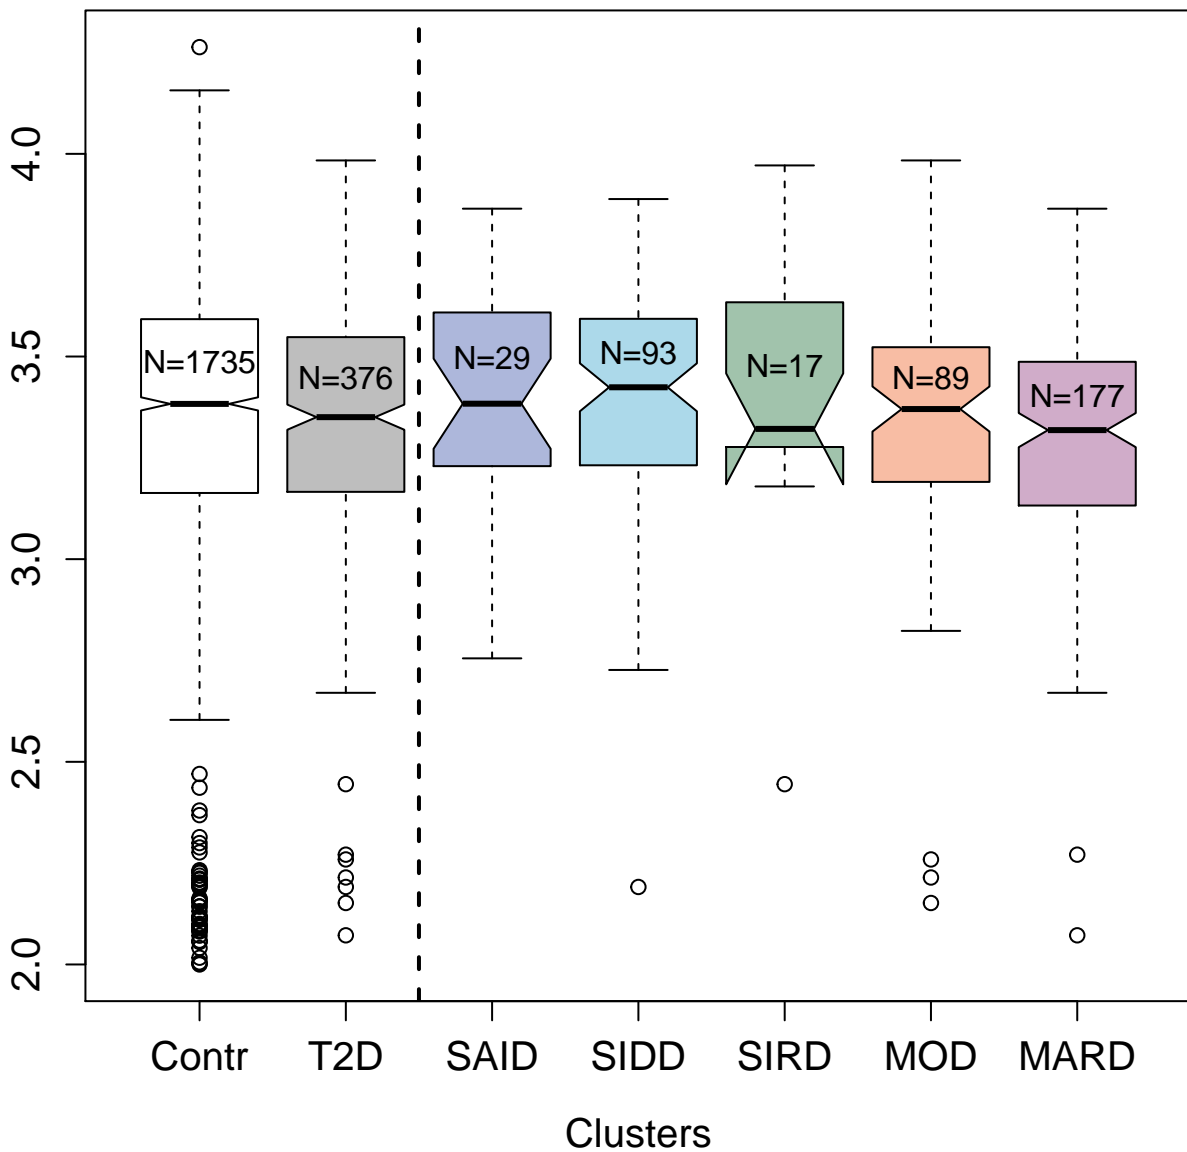

4476-22\_2 : Tyrosine-protein kinase ZAP-70

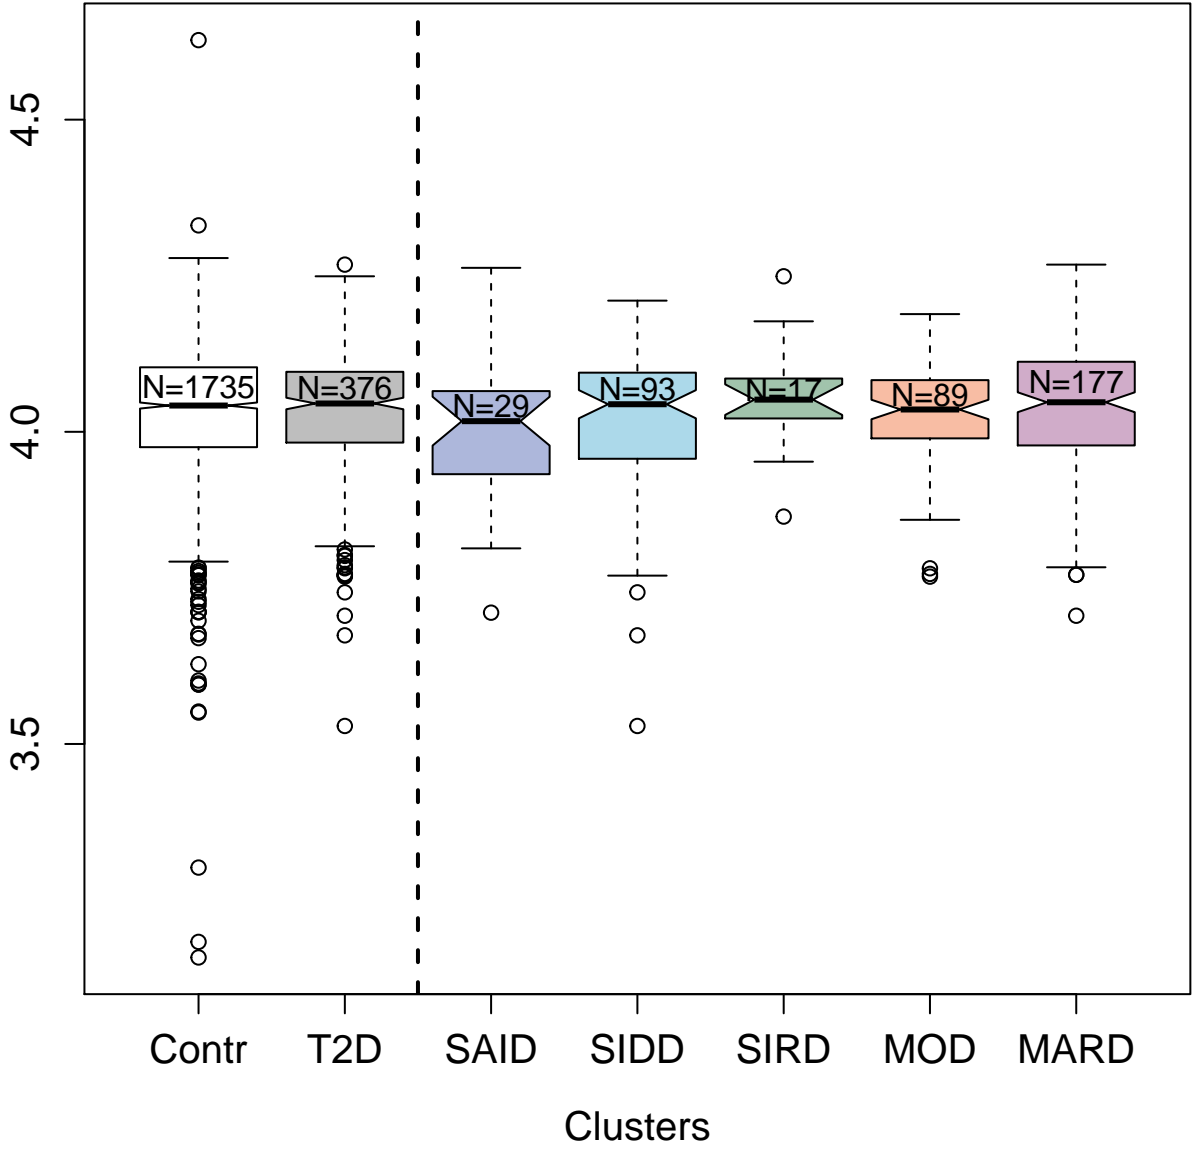

4192-10\_2 : Alcohol dehydrogenase [NADP(+)]

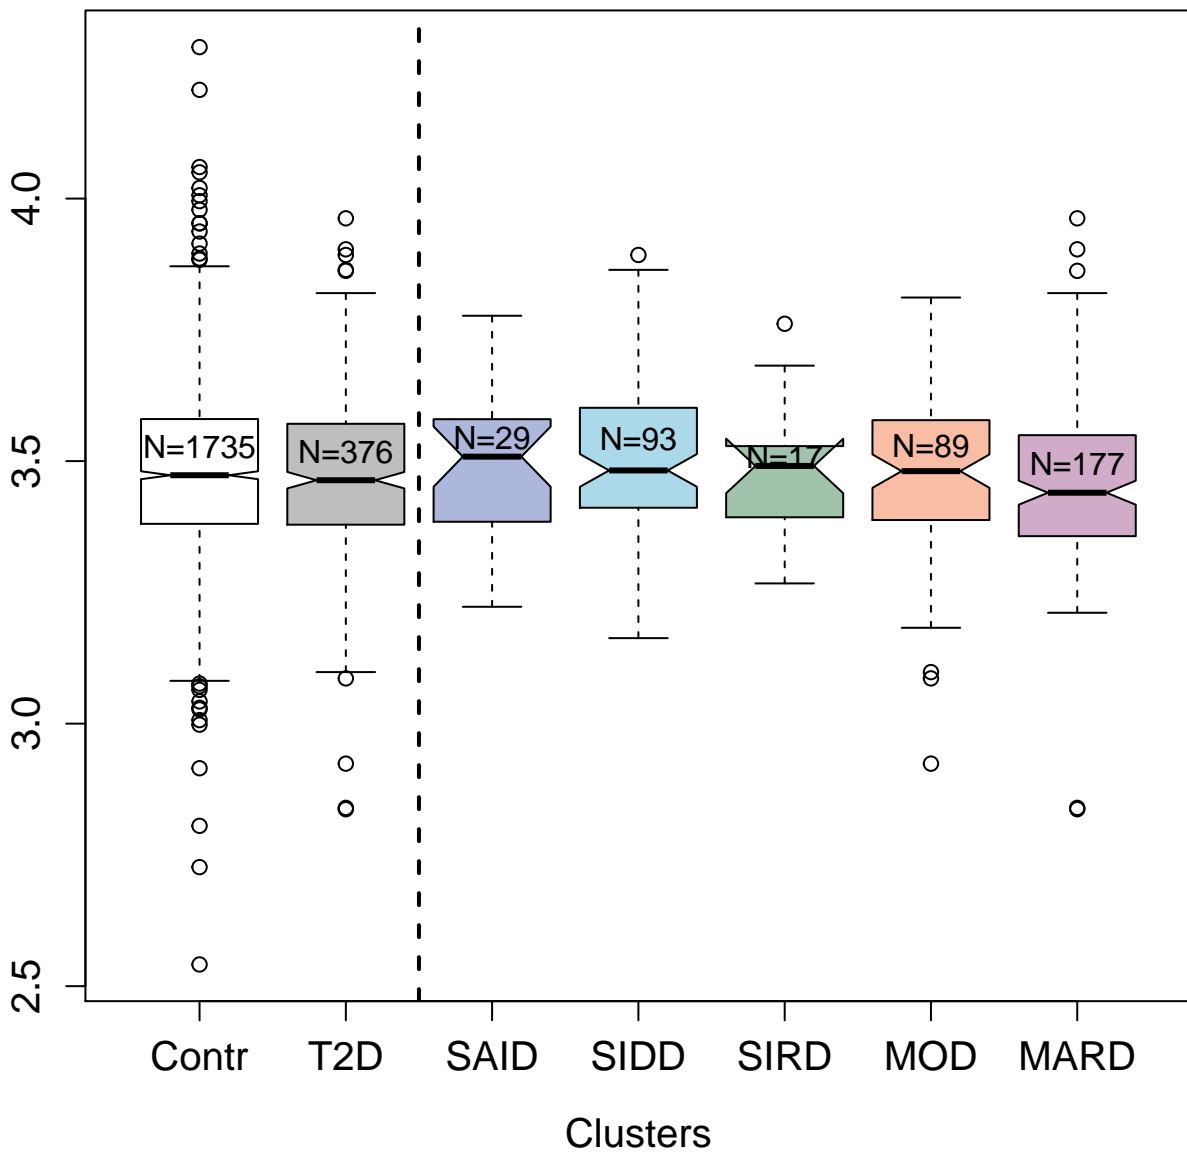

3855-56\_1 : Peroxiredoxin-1

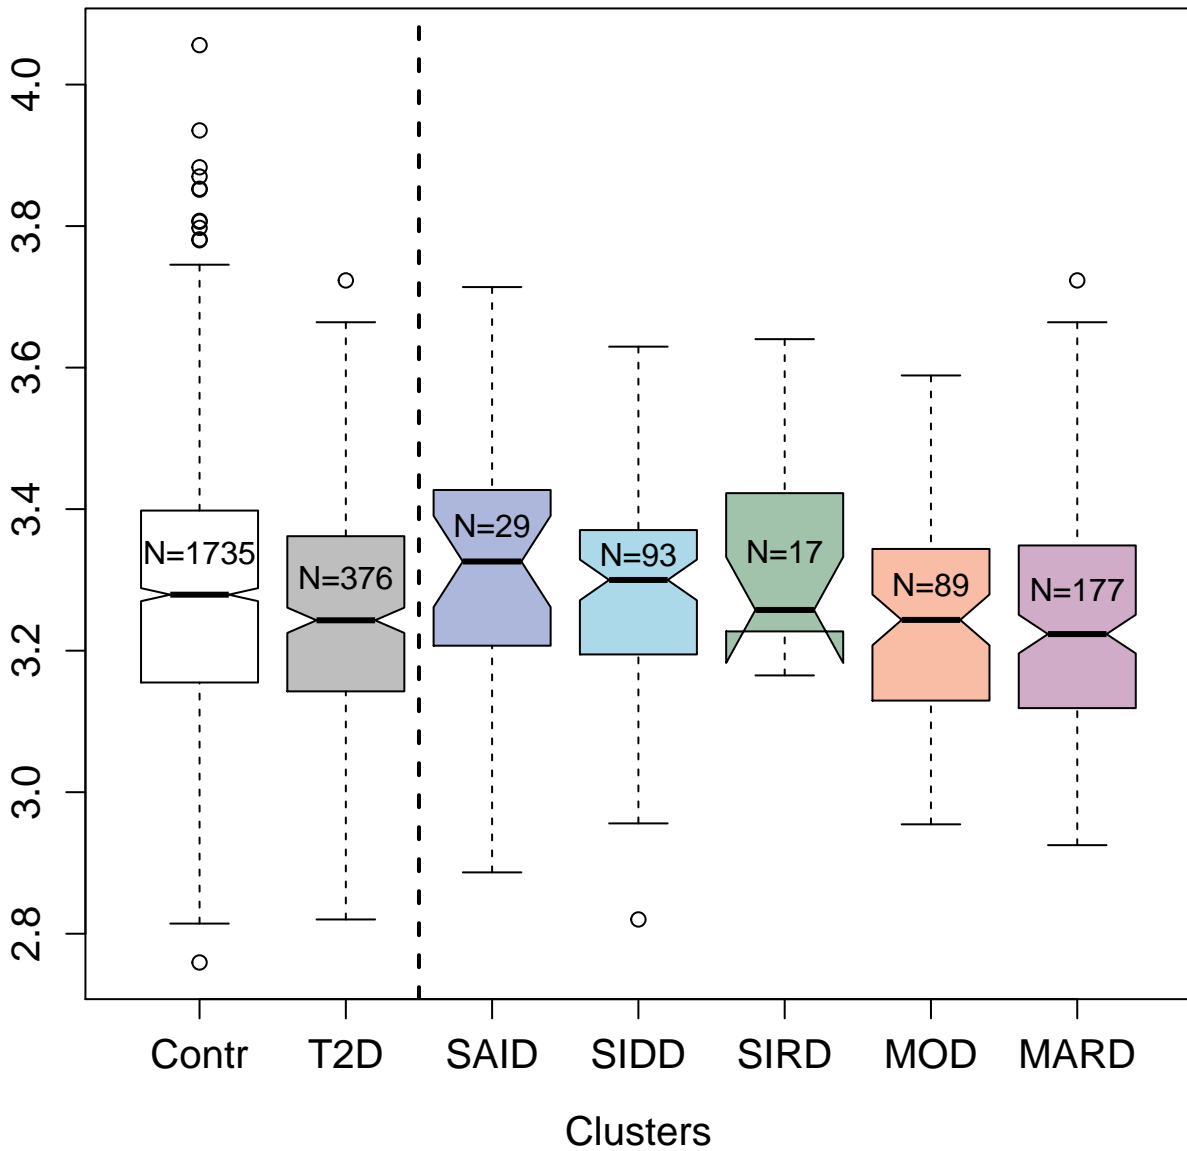

4389-2\_1 : Desert hedgehog protein N-product

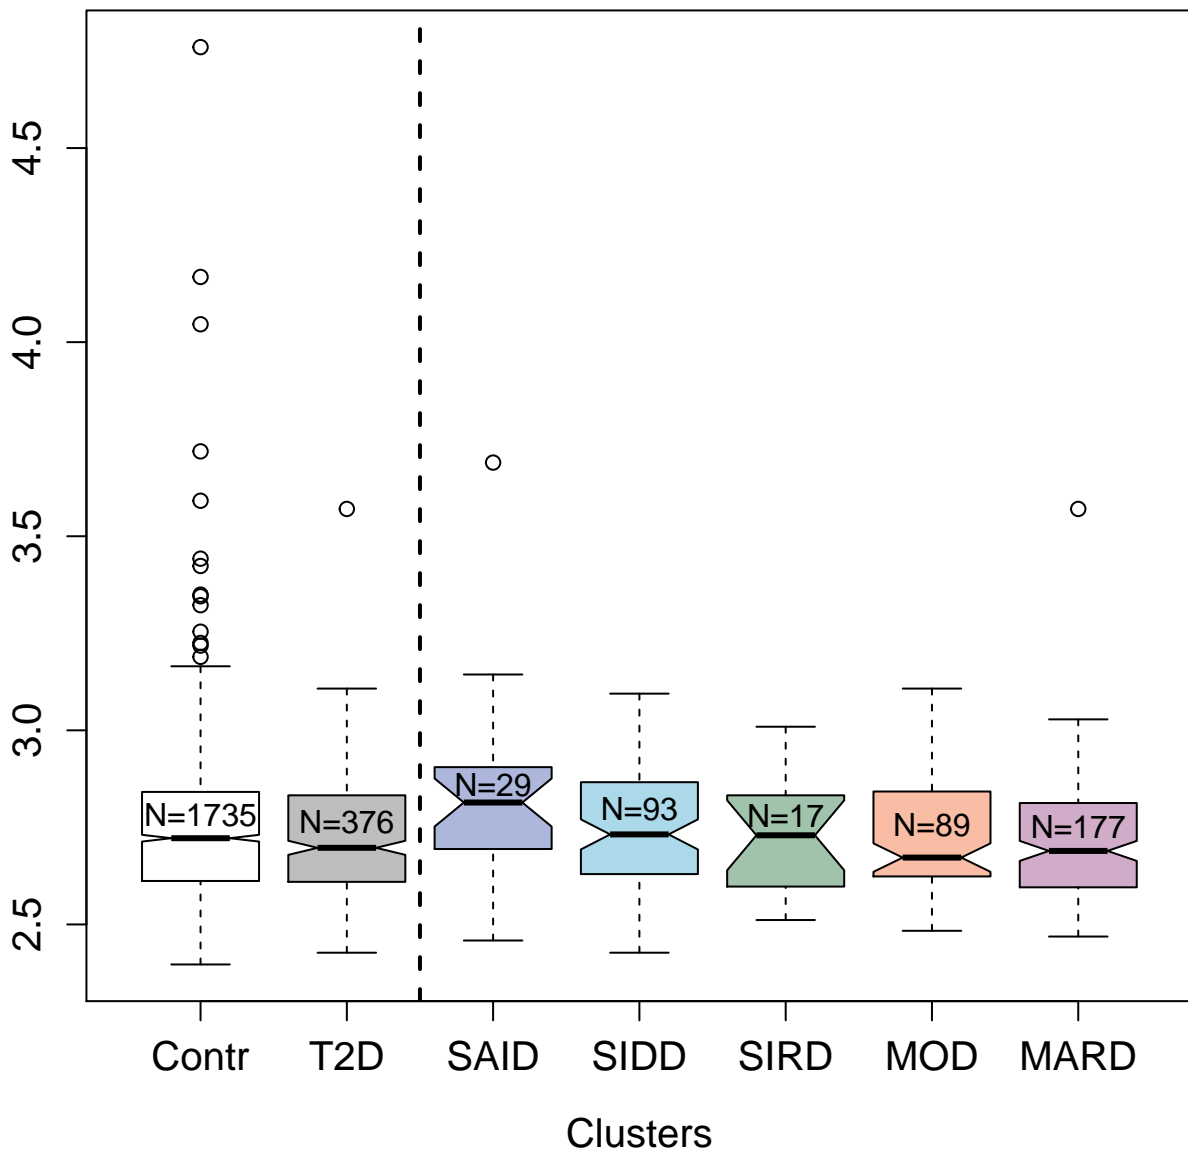



5062-60\_3 : CD226 antigen

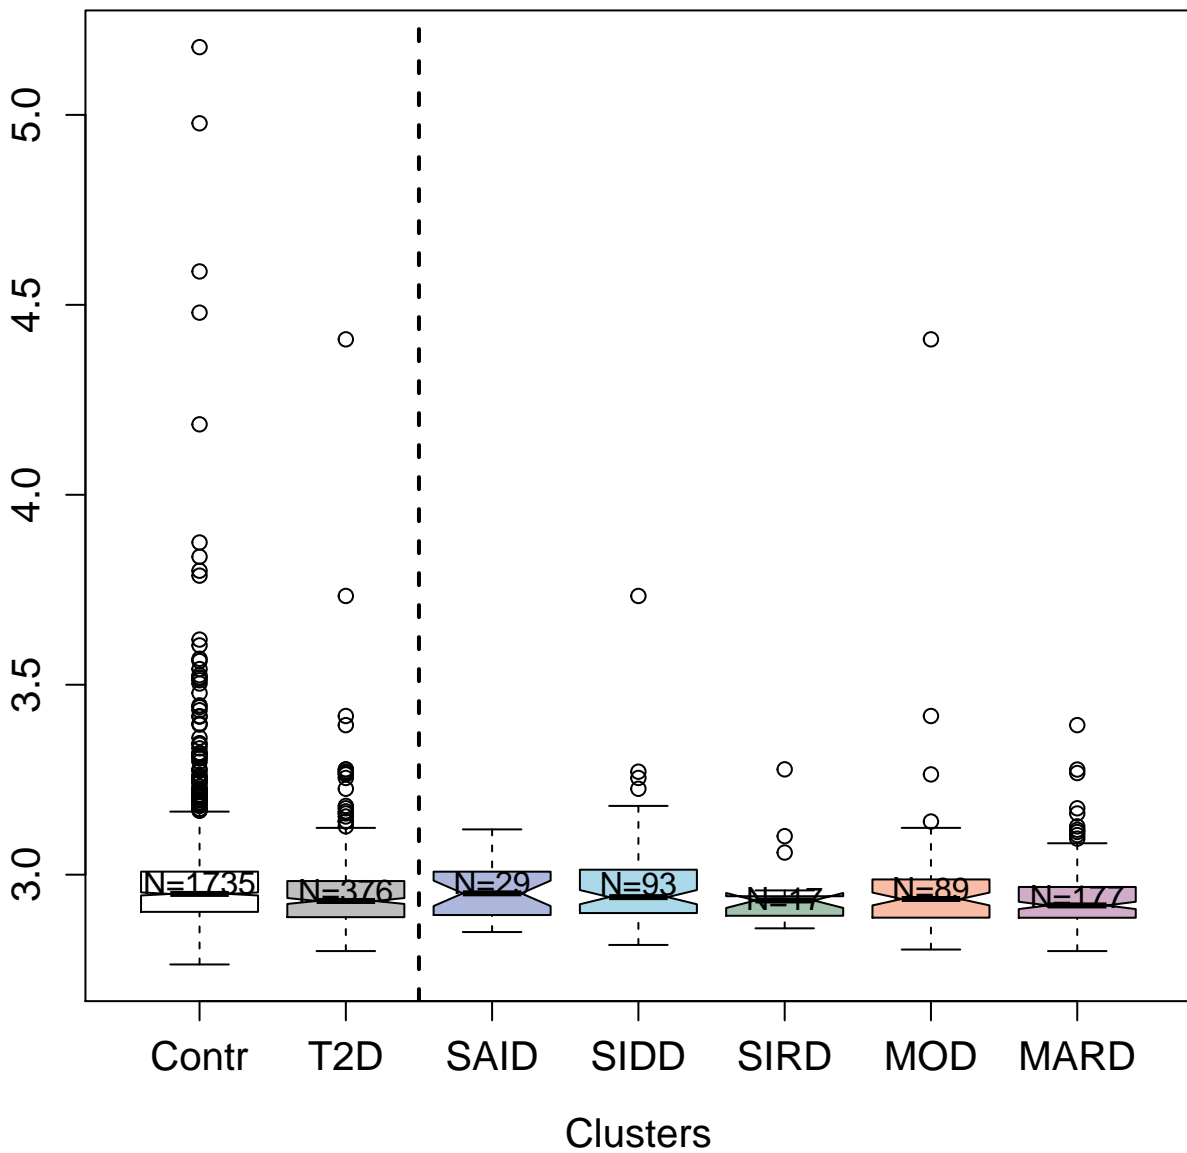

9175-48\_3 : Down syndrome cell adhesion molecule

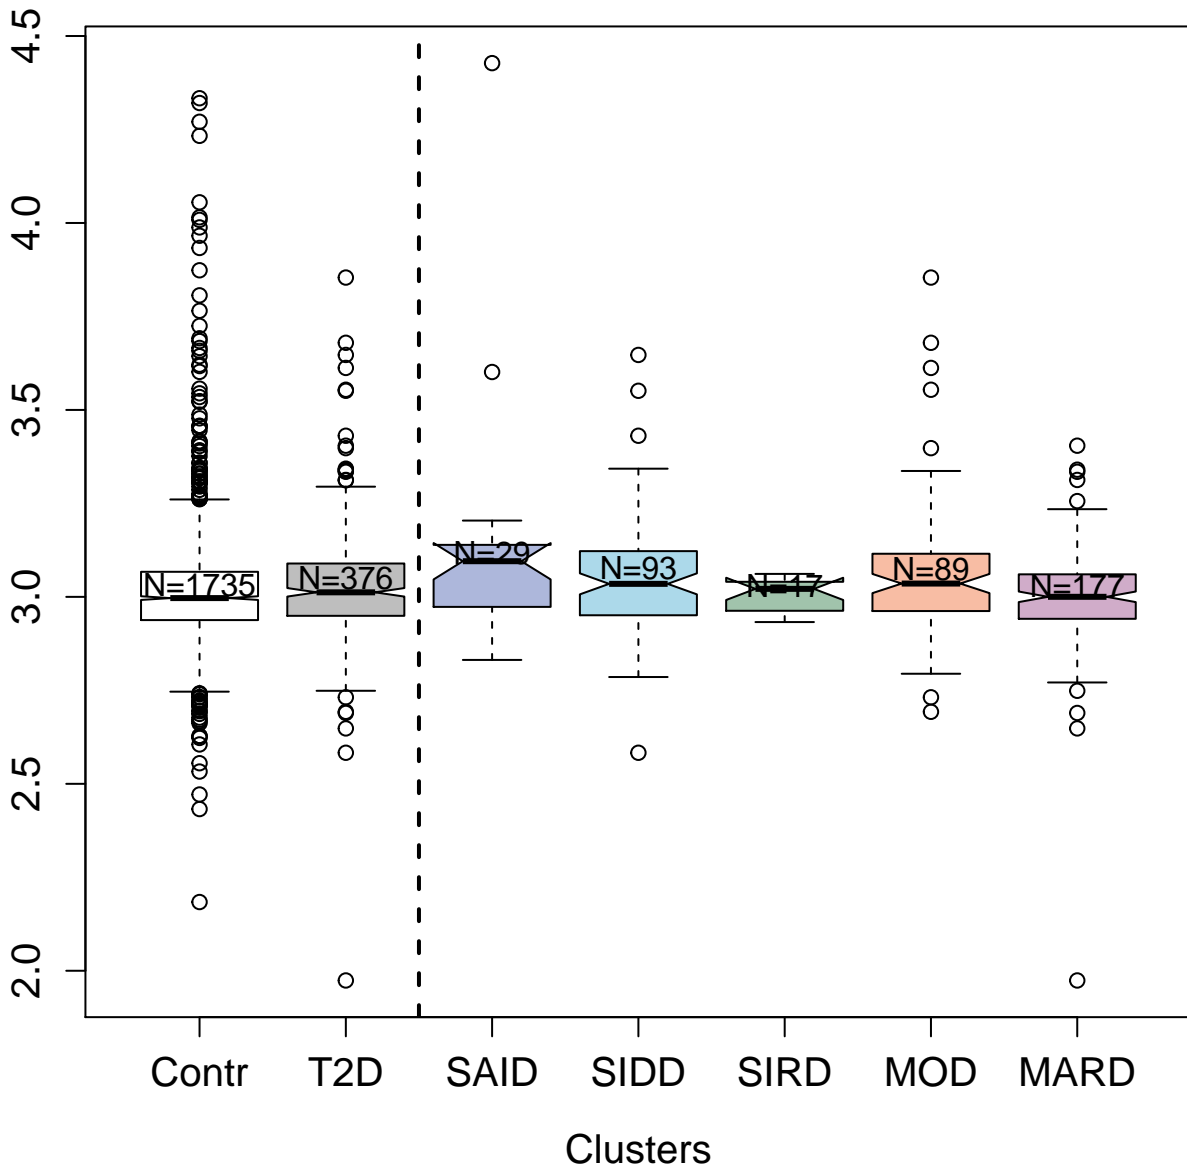

3453-87\_2 : Tyrosine-protein kinase Lyn

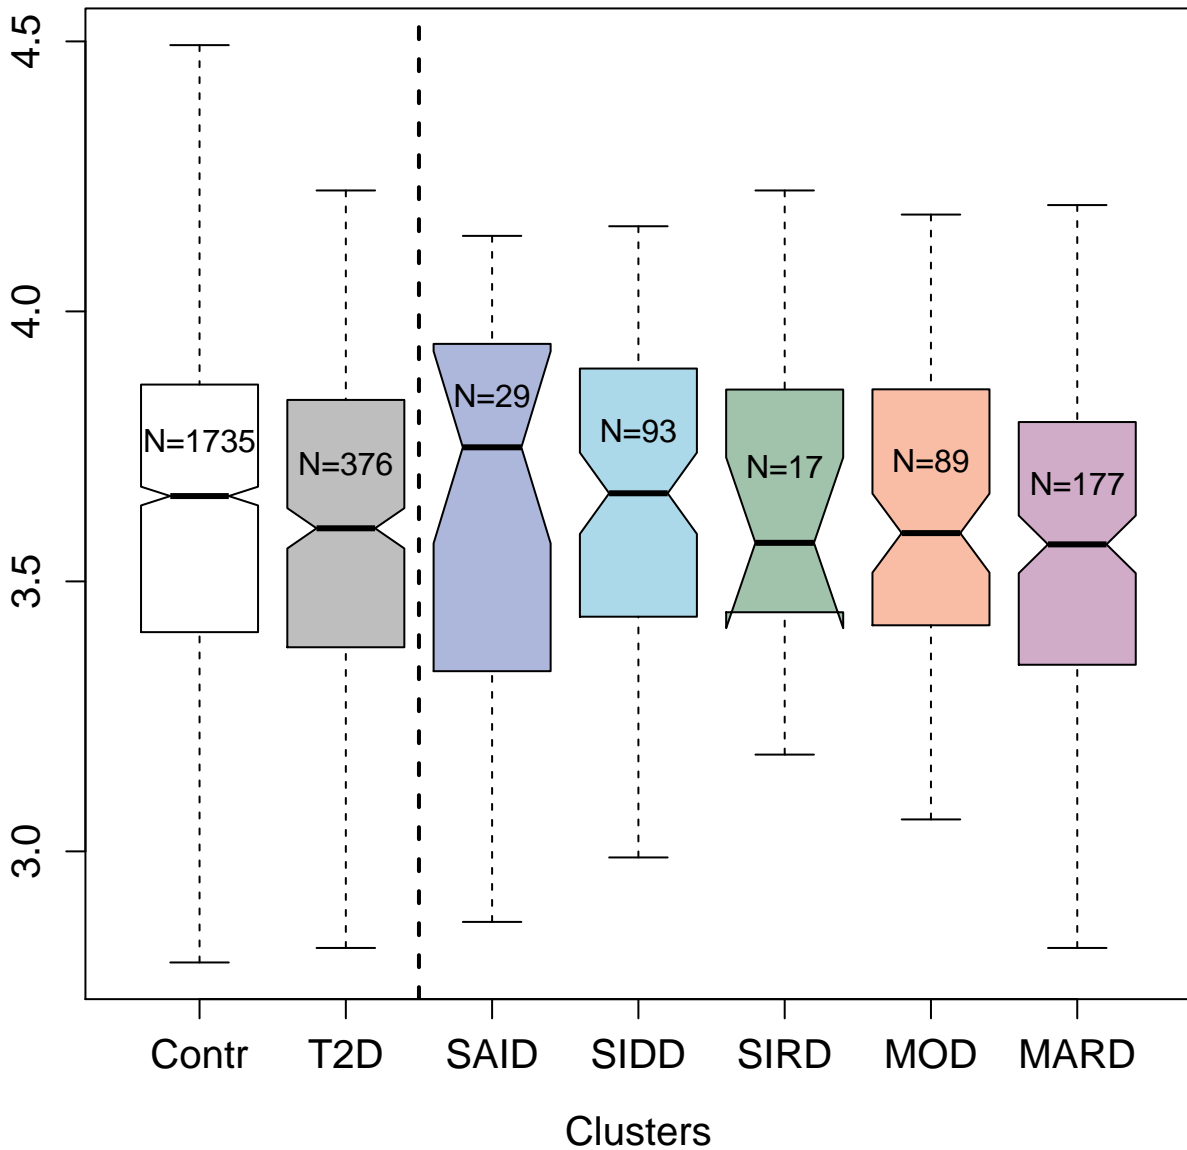

3170-6\_1 : Methionine aminopeptidase 2

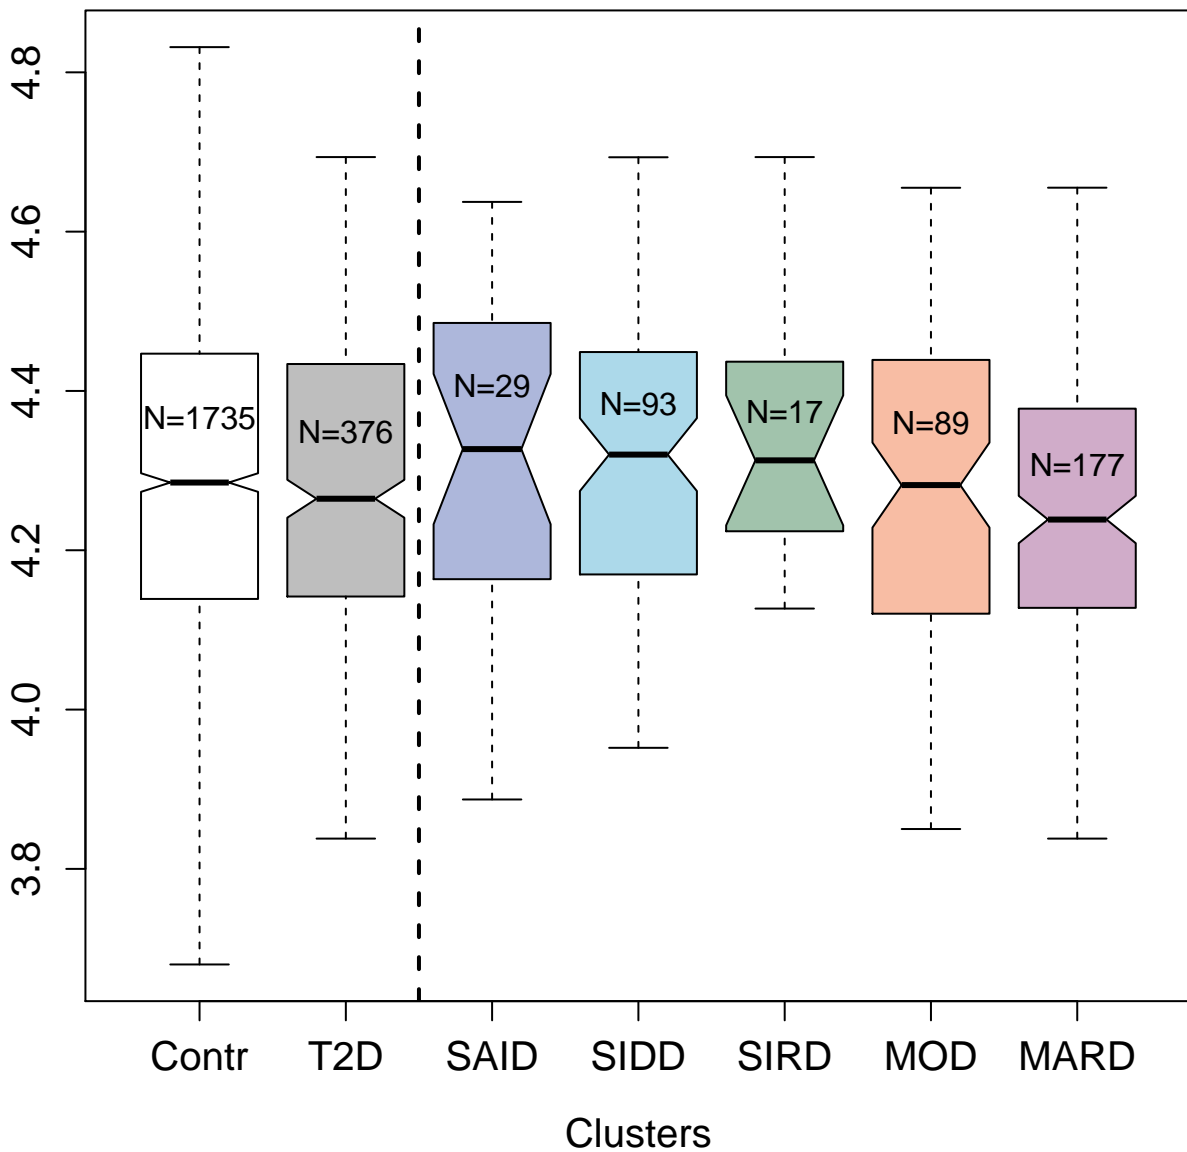

3484-60\_2 : Angiotensinogen

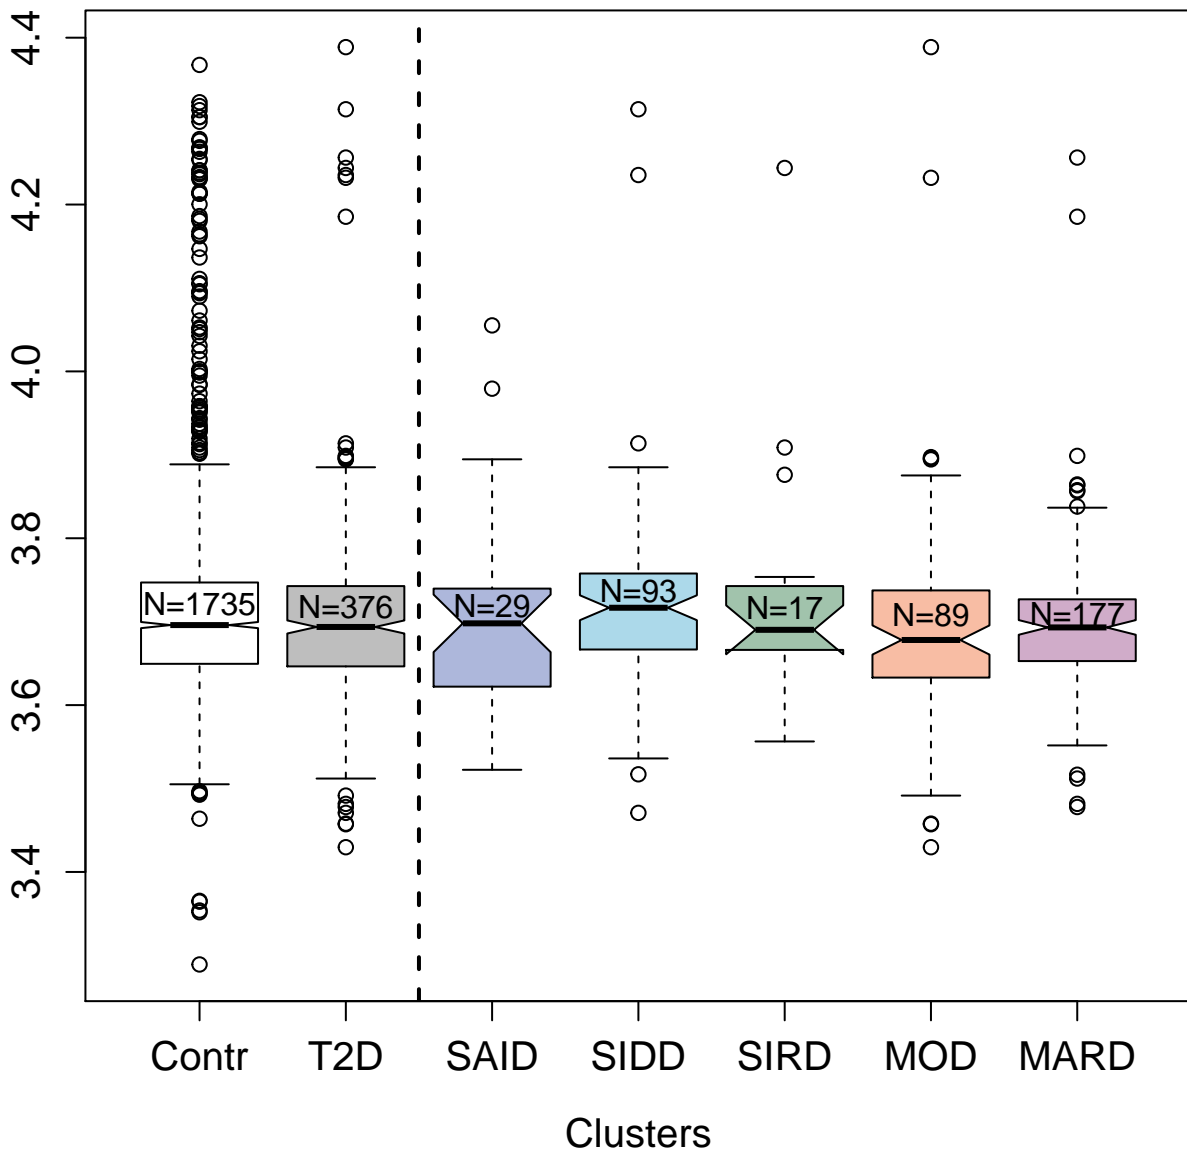

3024-18\_2 : Alpha-2-antiplasmin

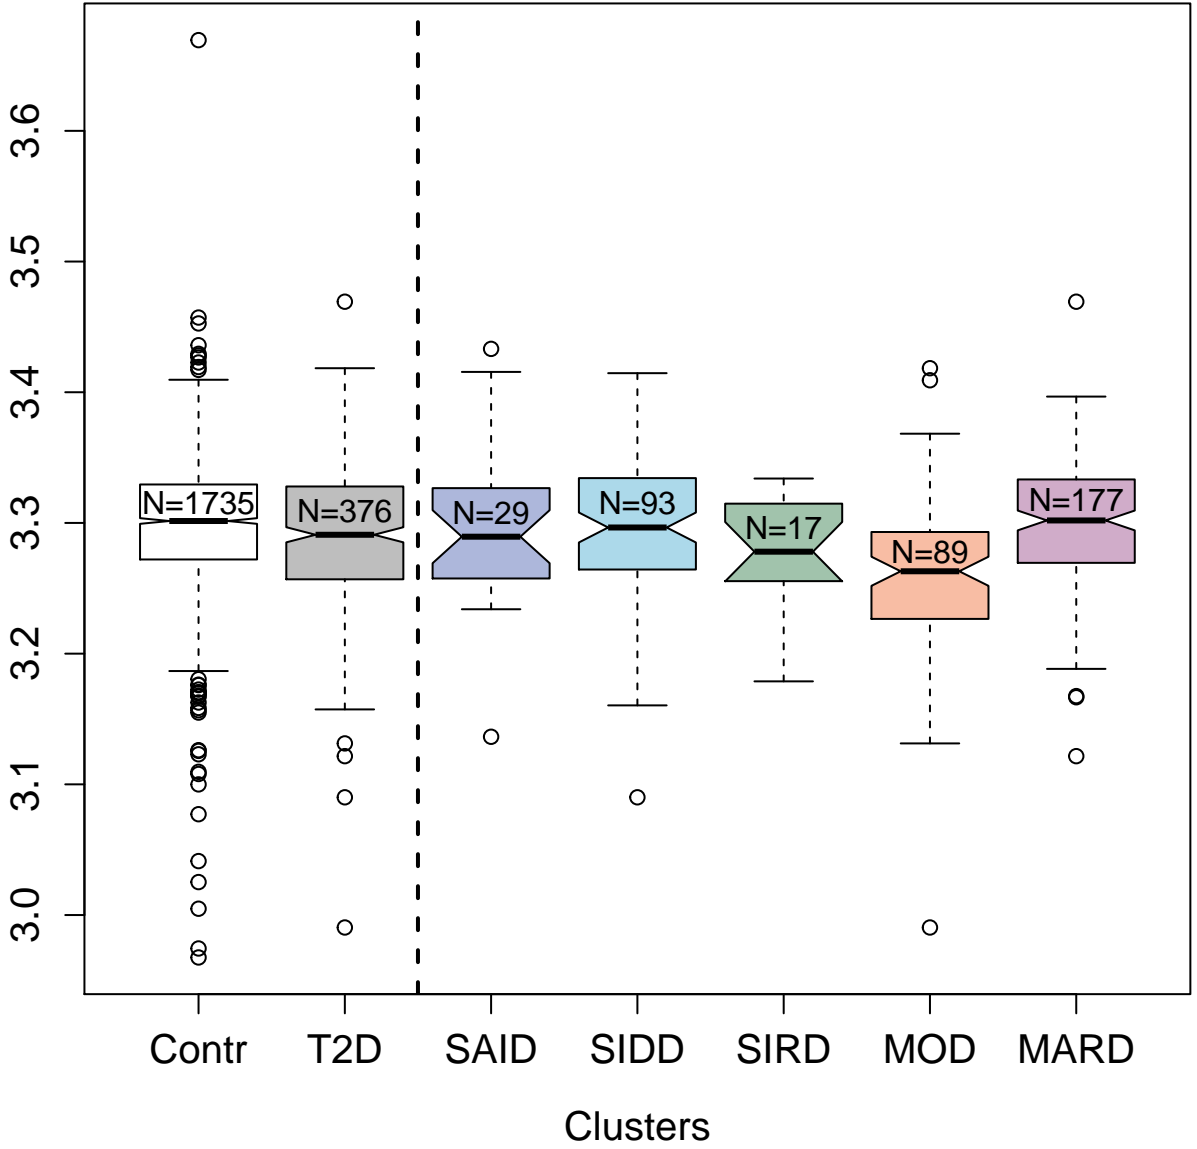

4212-5\_3 : Epidermal growth factor receptor  
substrate 15-like 1

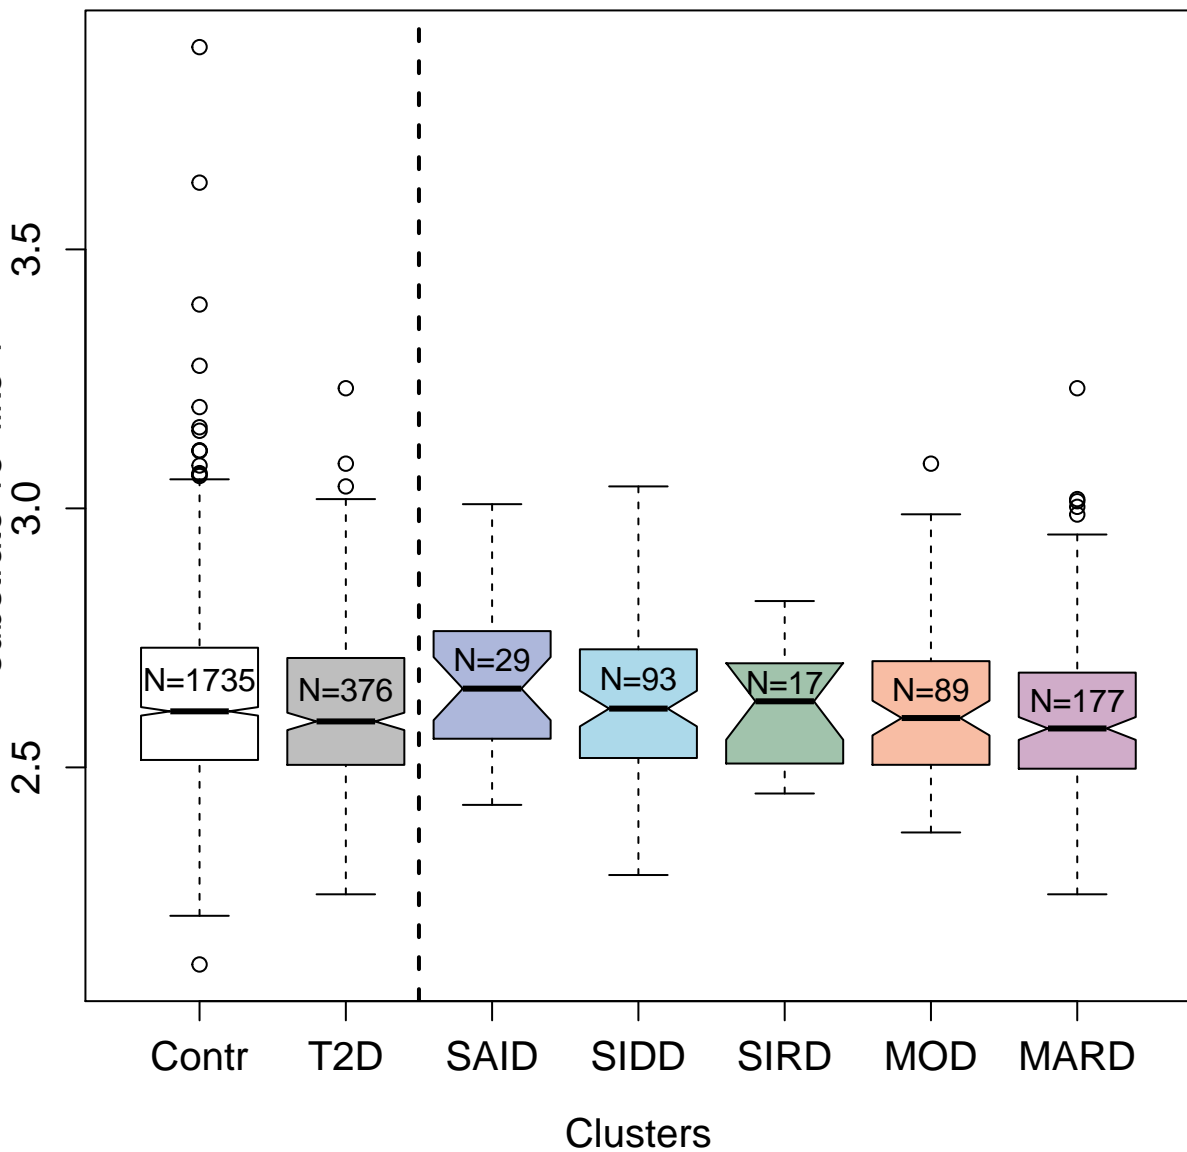

4220-39\_2 : Tyrosine-protein kinase Fer

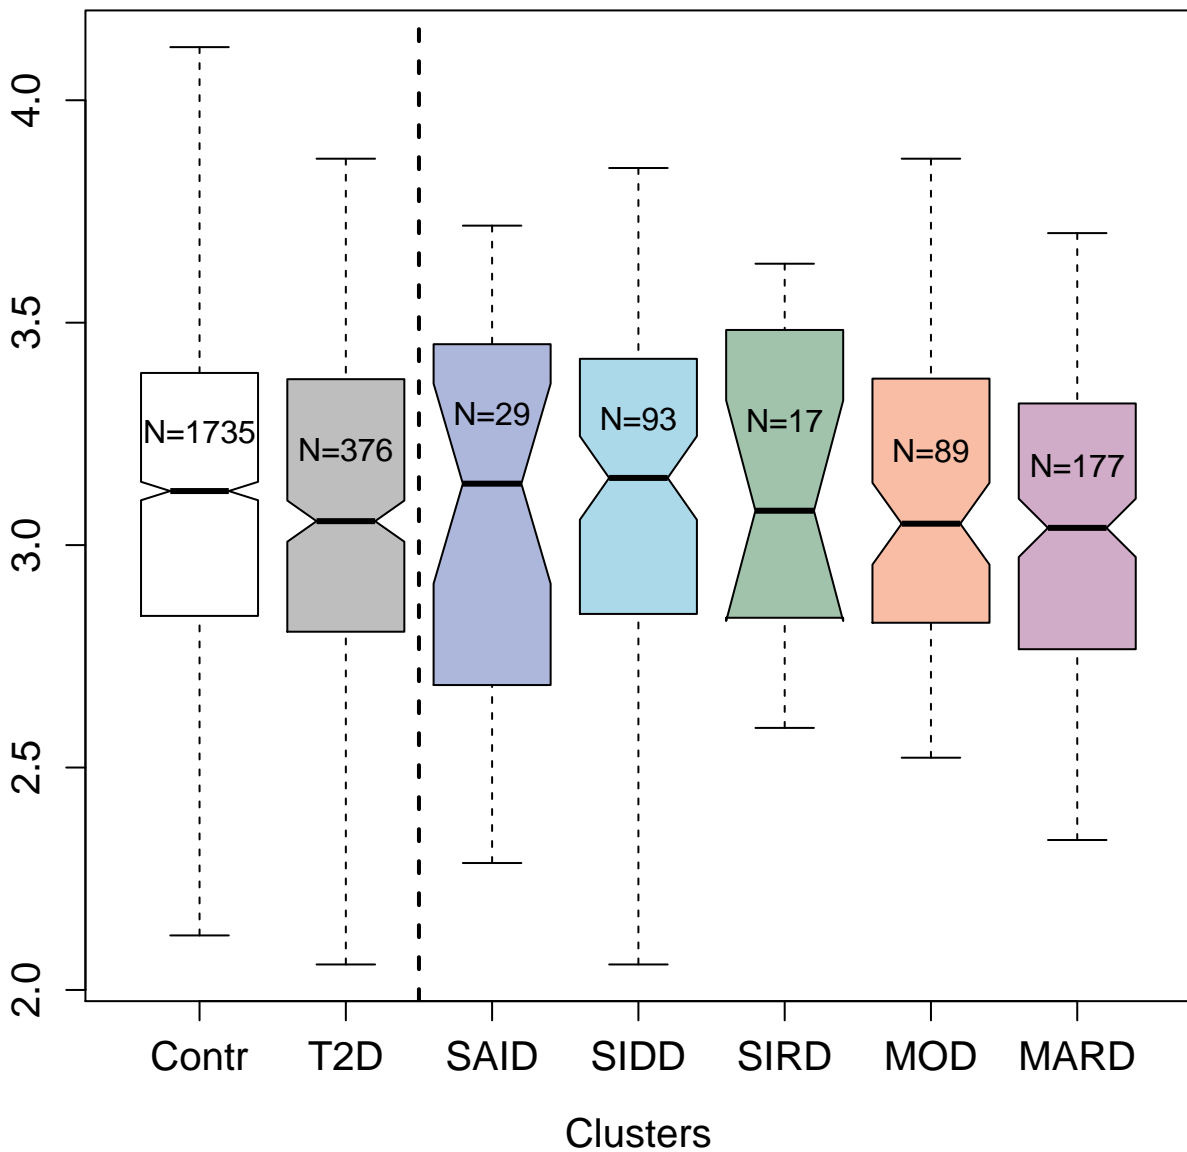



3052-8\_2 : Tumor necrosis factor ligand  
superfamily member 6; soluble form

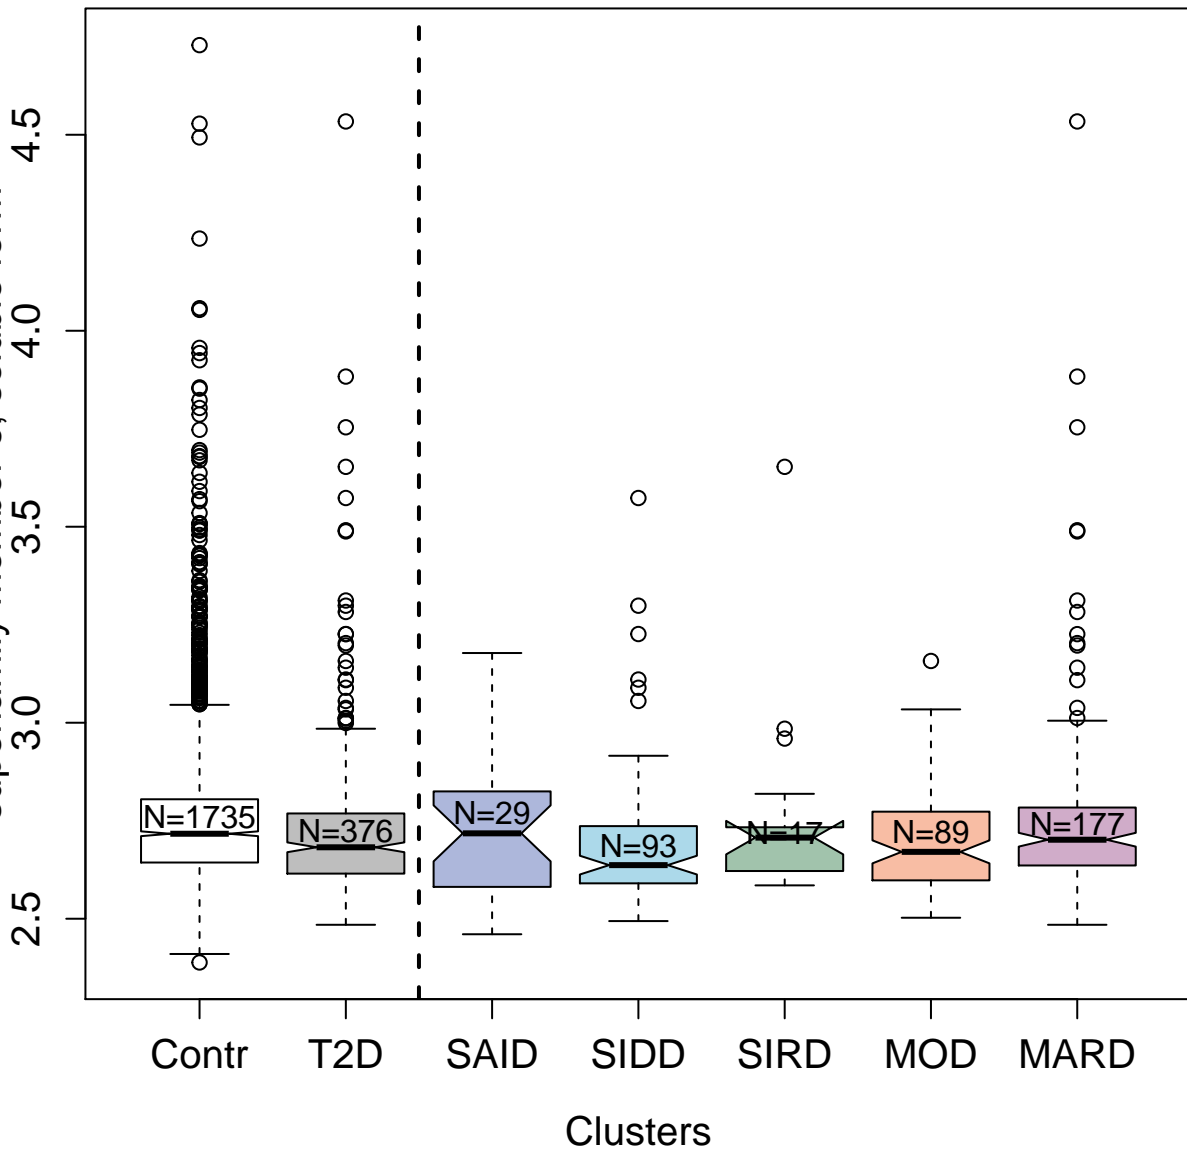

3059-50\_2 : Tumor necrosis factor ligand  
superfamily member 13B

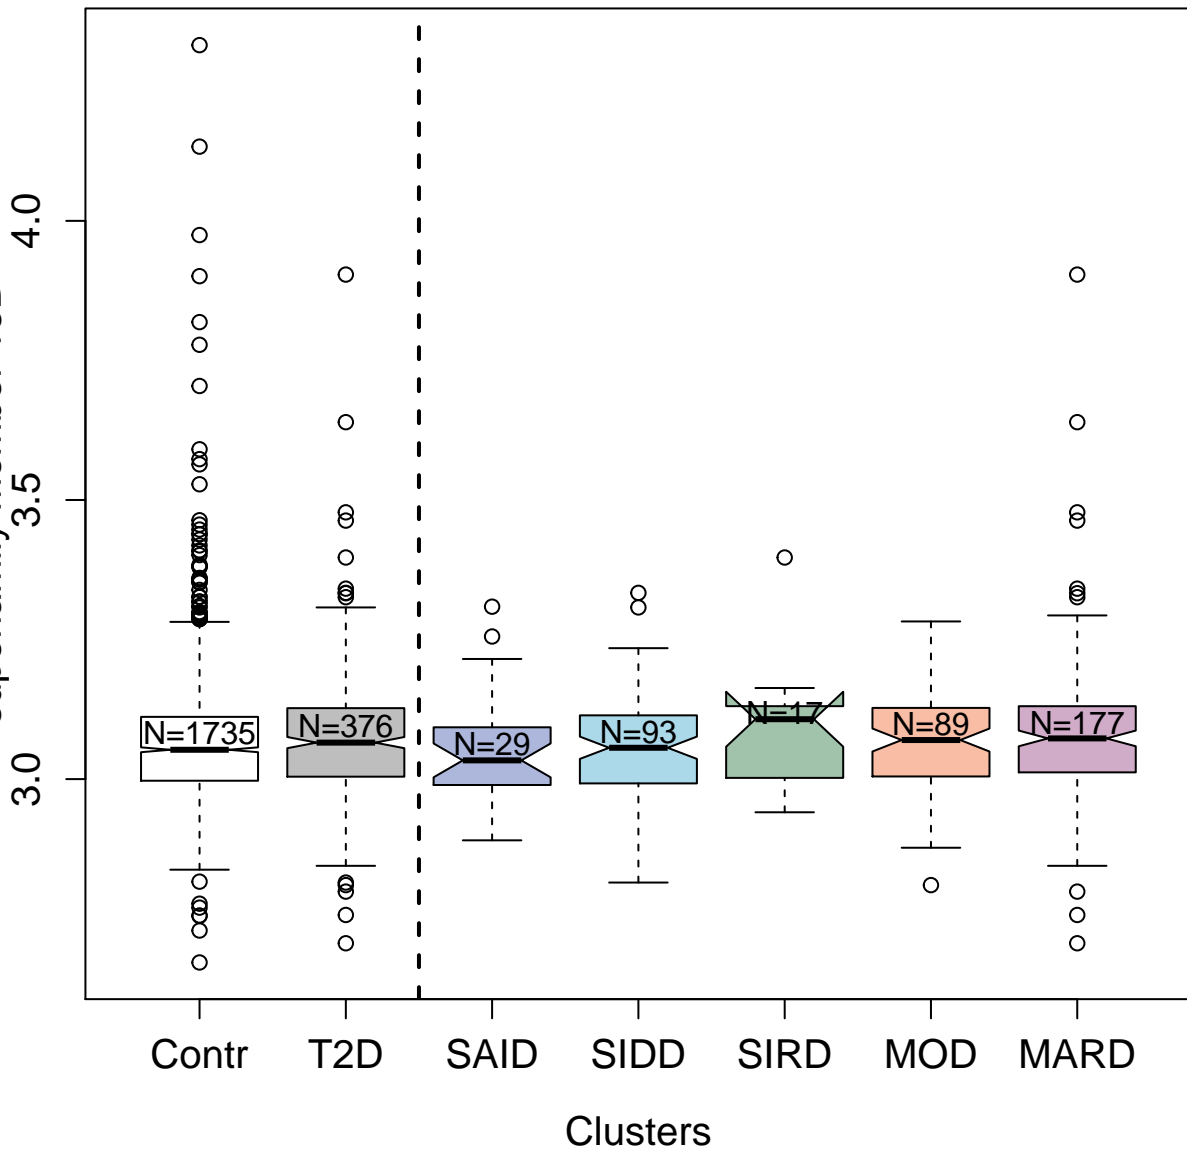

4145-58\_2 : Neurotrophin-3

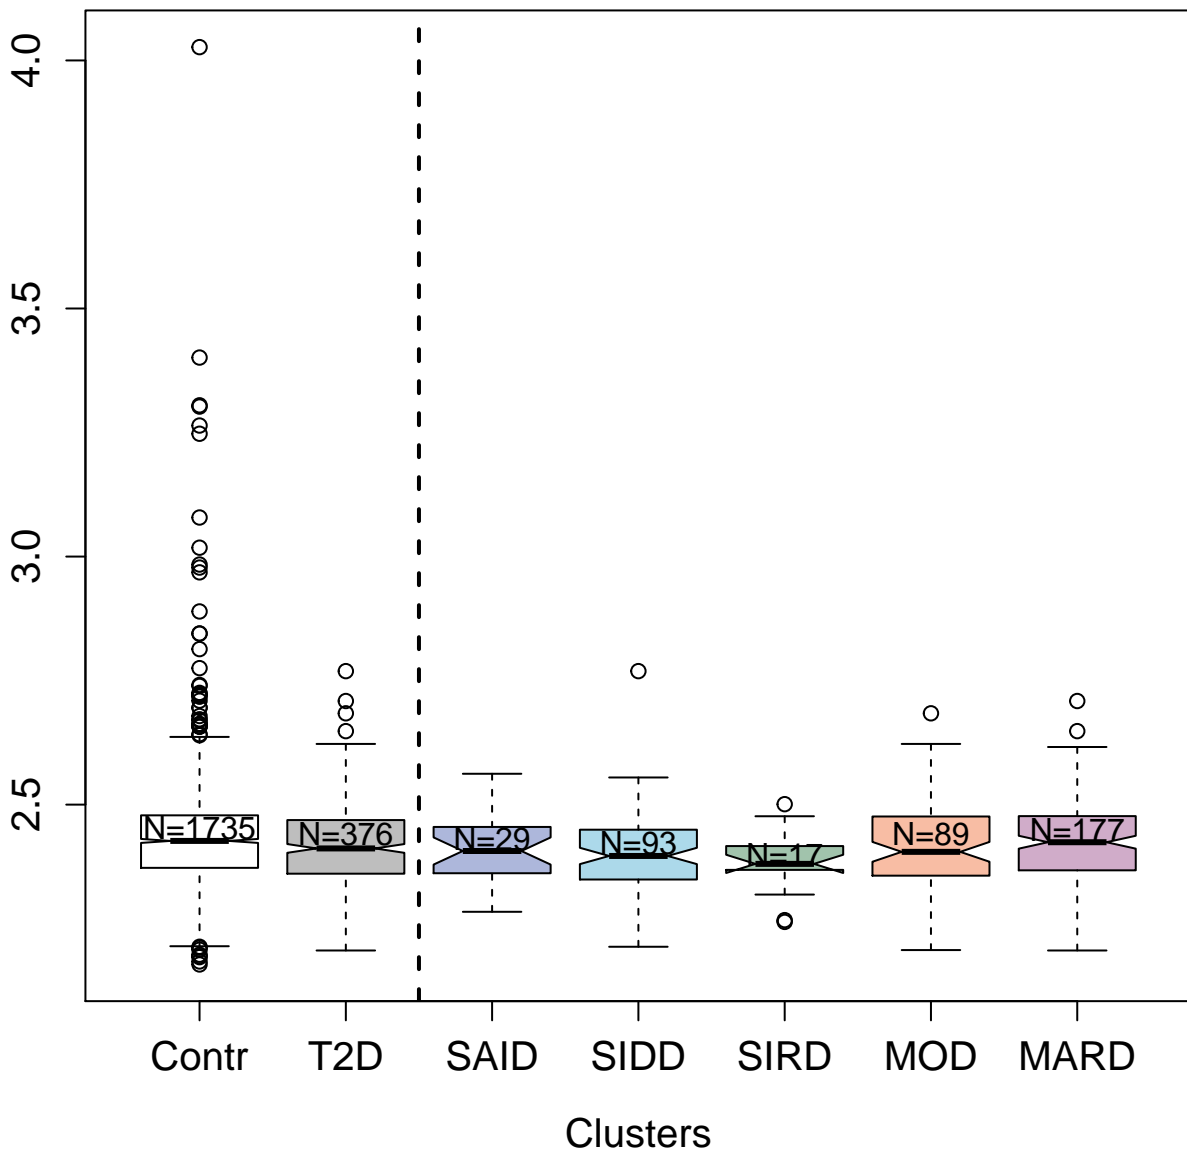

3852-19\_2 : DnaJ homolog subfamily B member 1

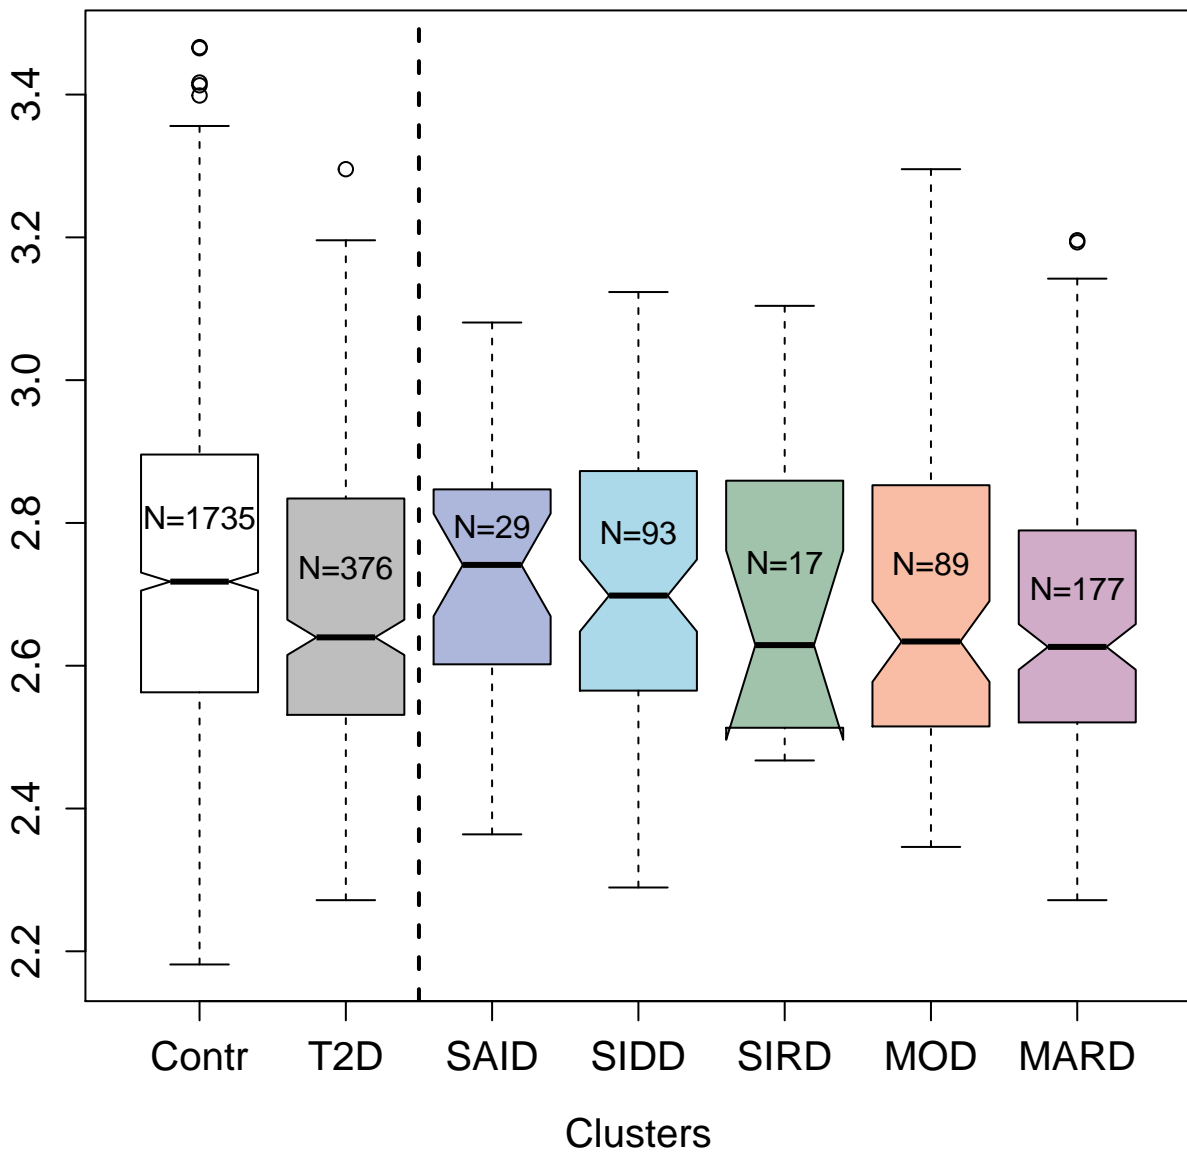

2781-63\_2 : C-C motif chemokine 4-like

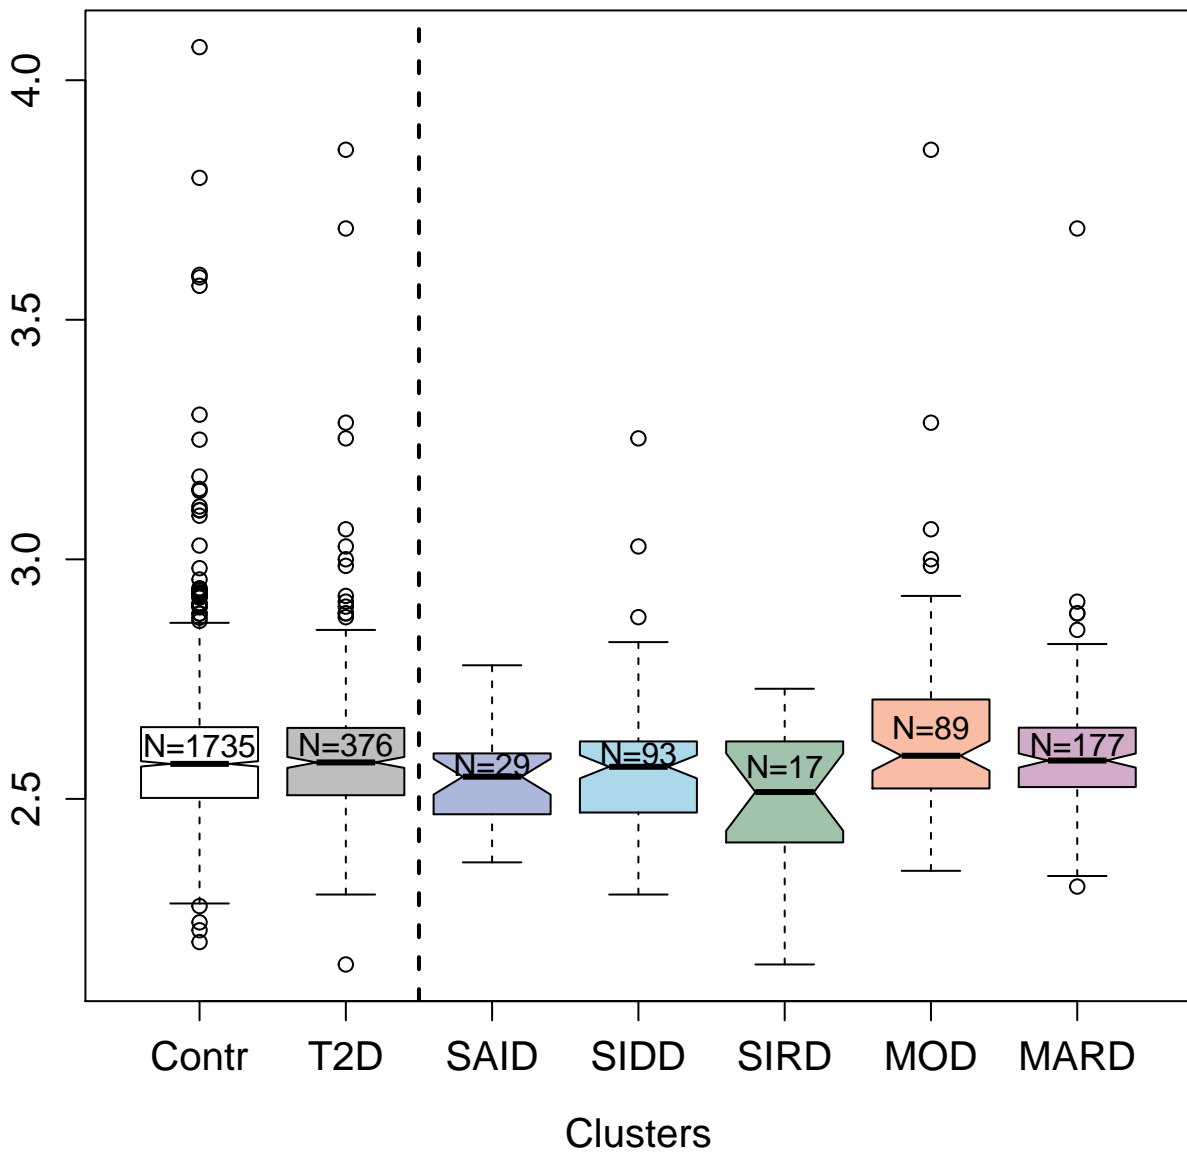

4719-58\_2 : Protein disulfide-isomerase A3

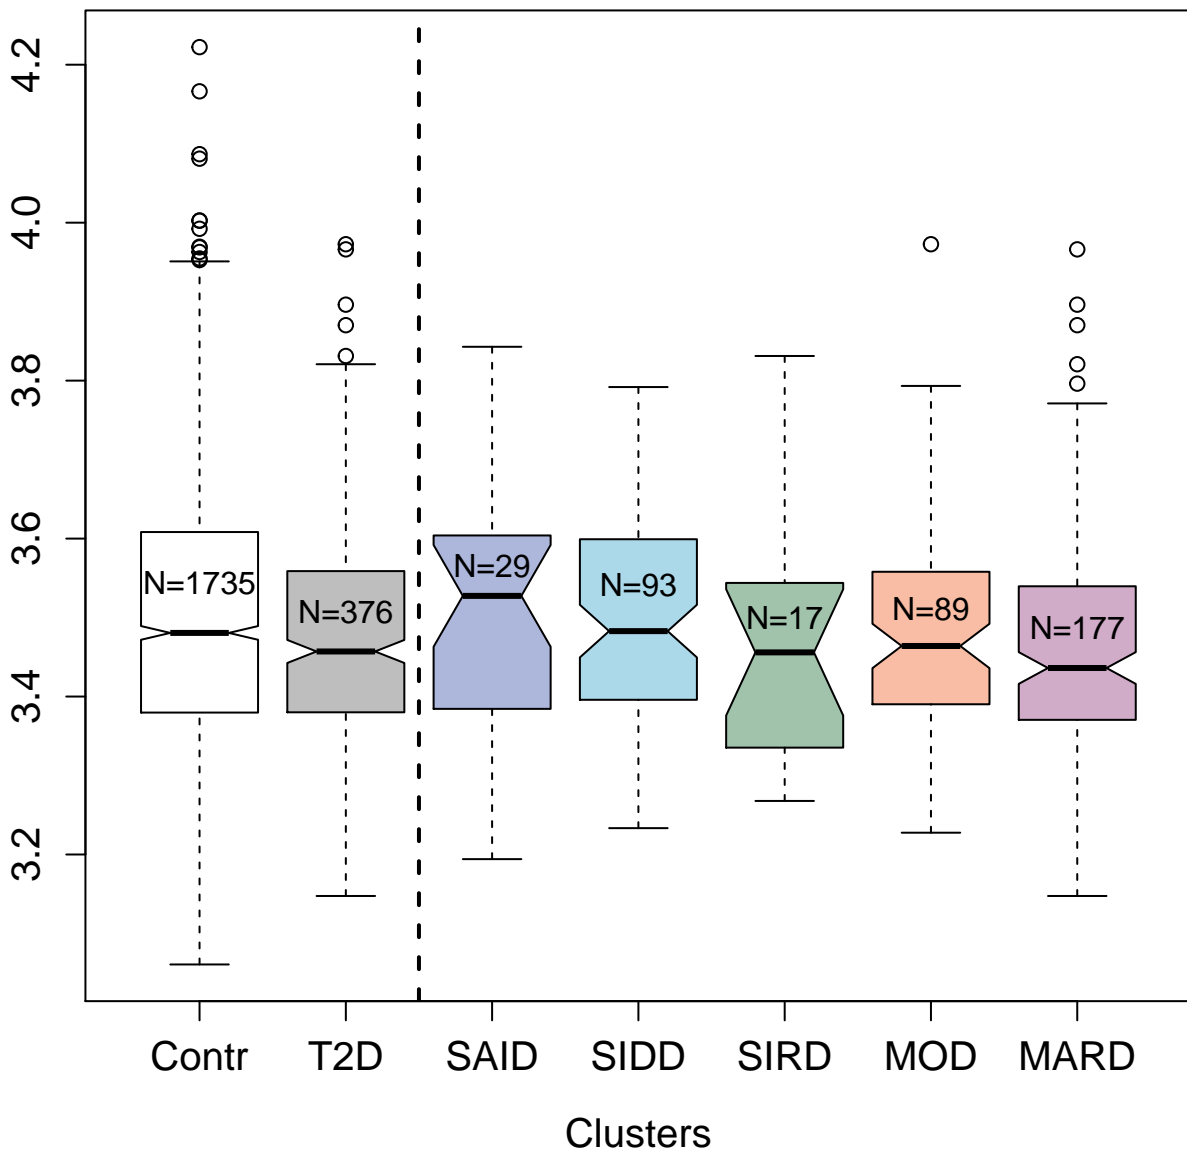

2480-58\_3 : Metalloproteinase inhibitor 3

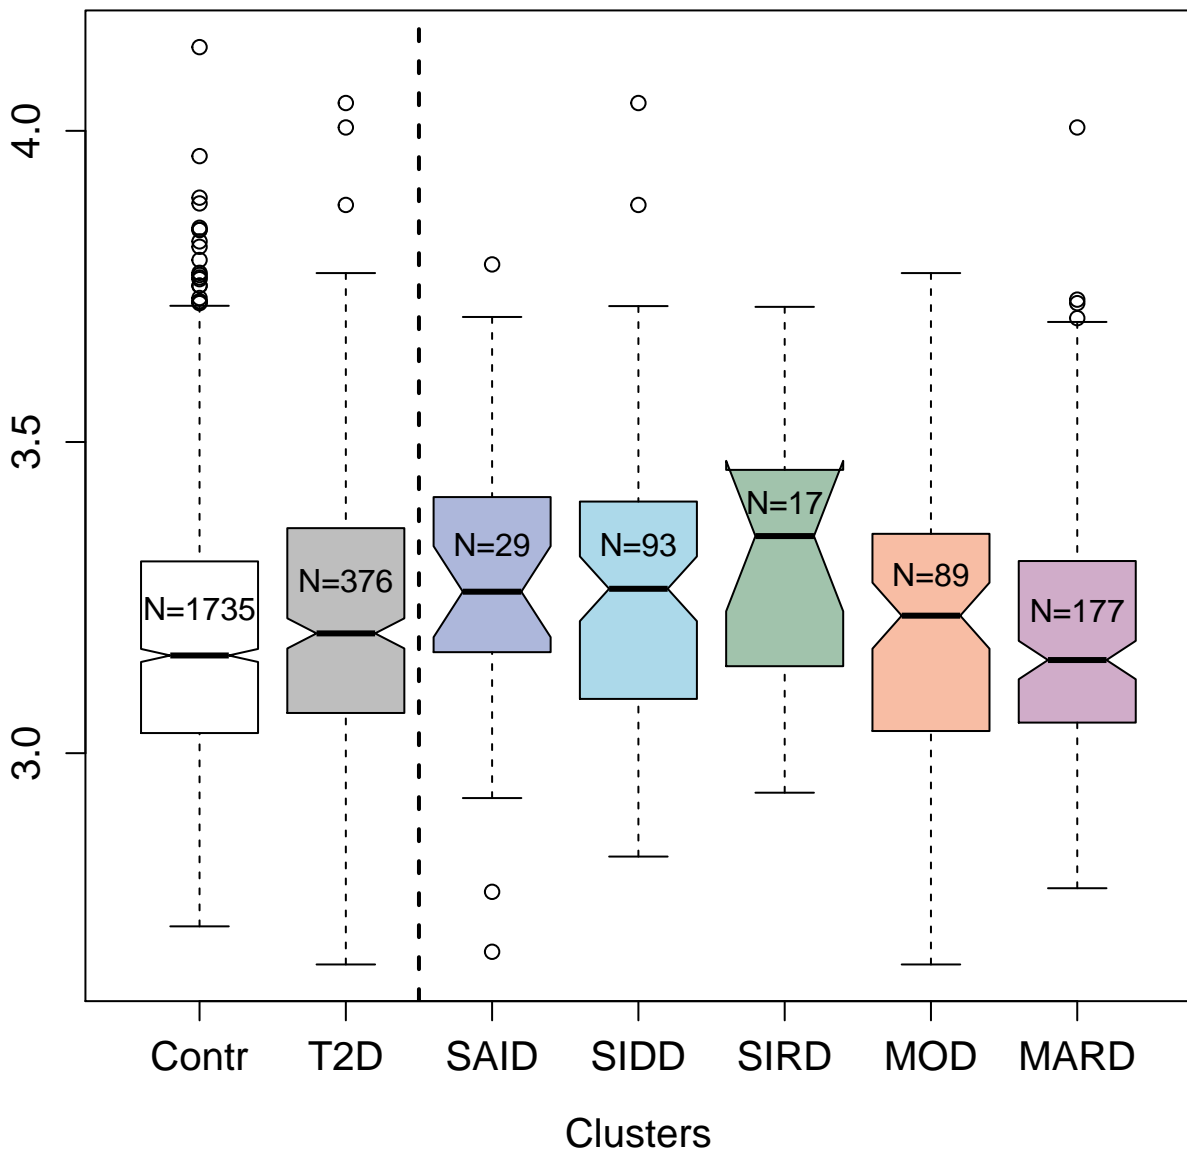

3381-24\_2 : Tyrosine-protein kinase Lyn; isoform B

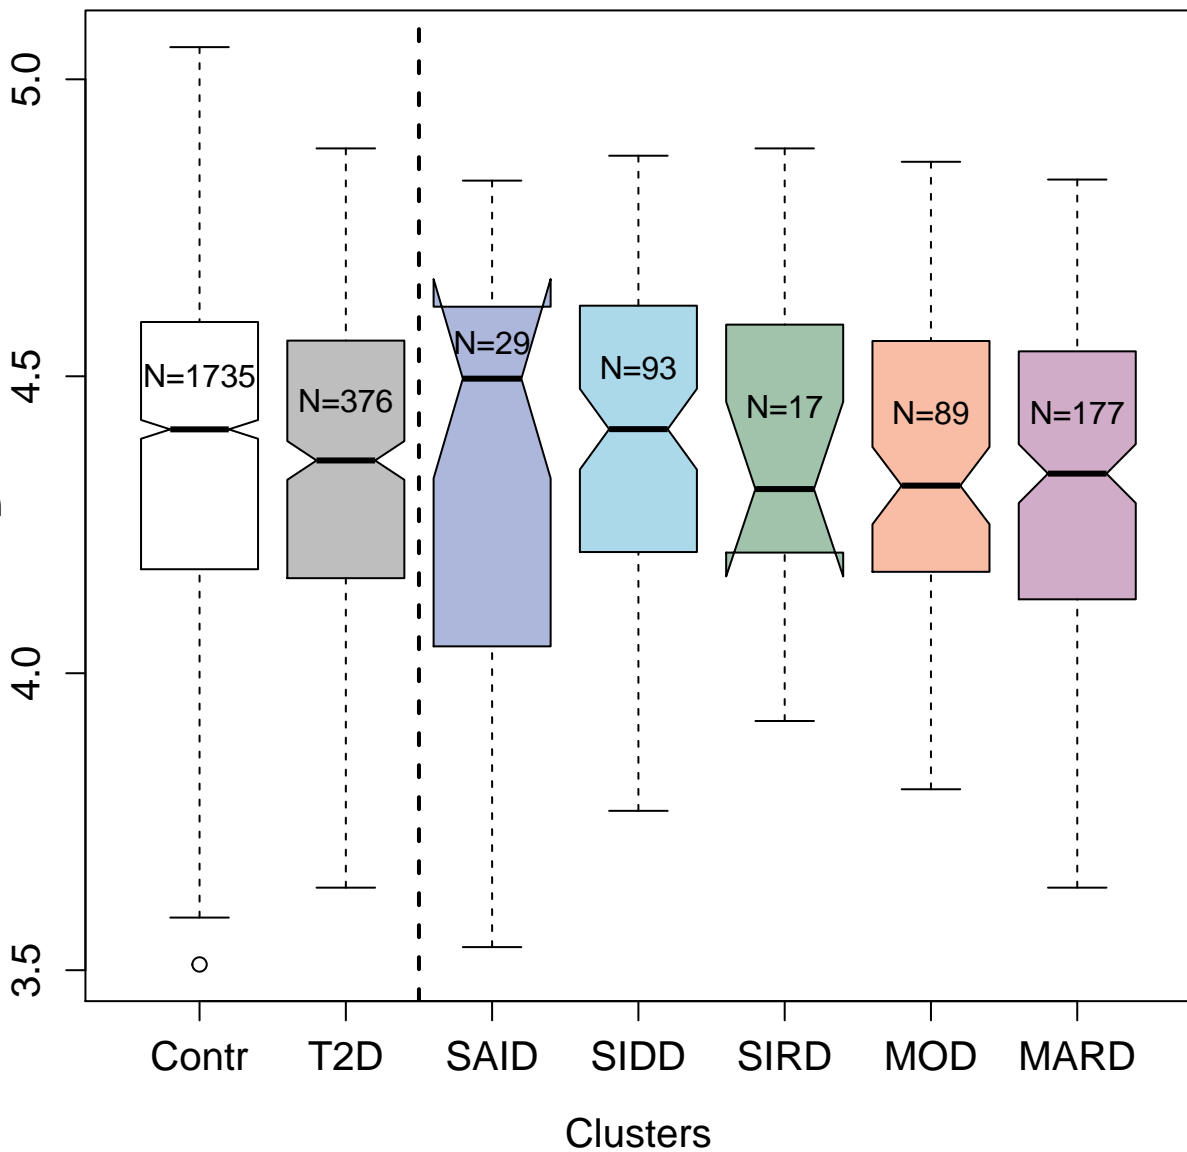



2778-10\_2 : Interleukin-22

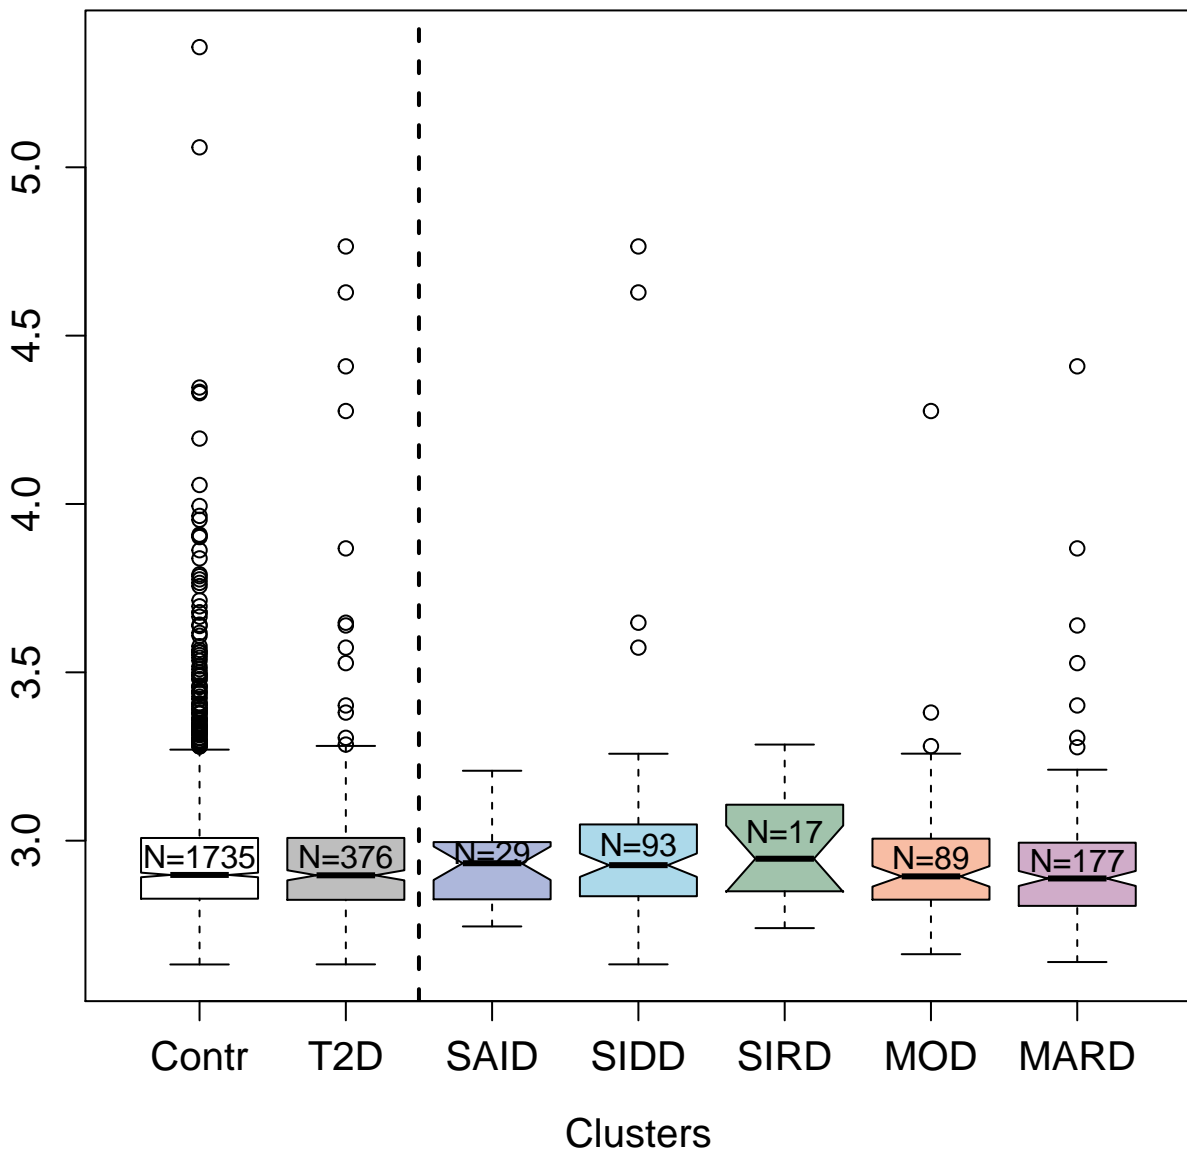

3208-2\_4 : Matrilin-3

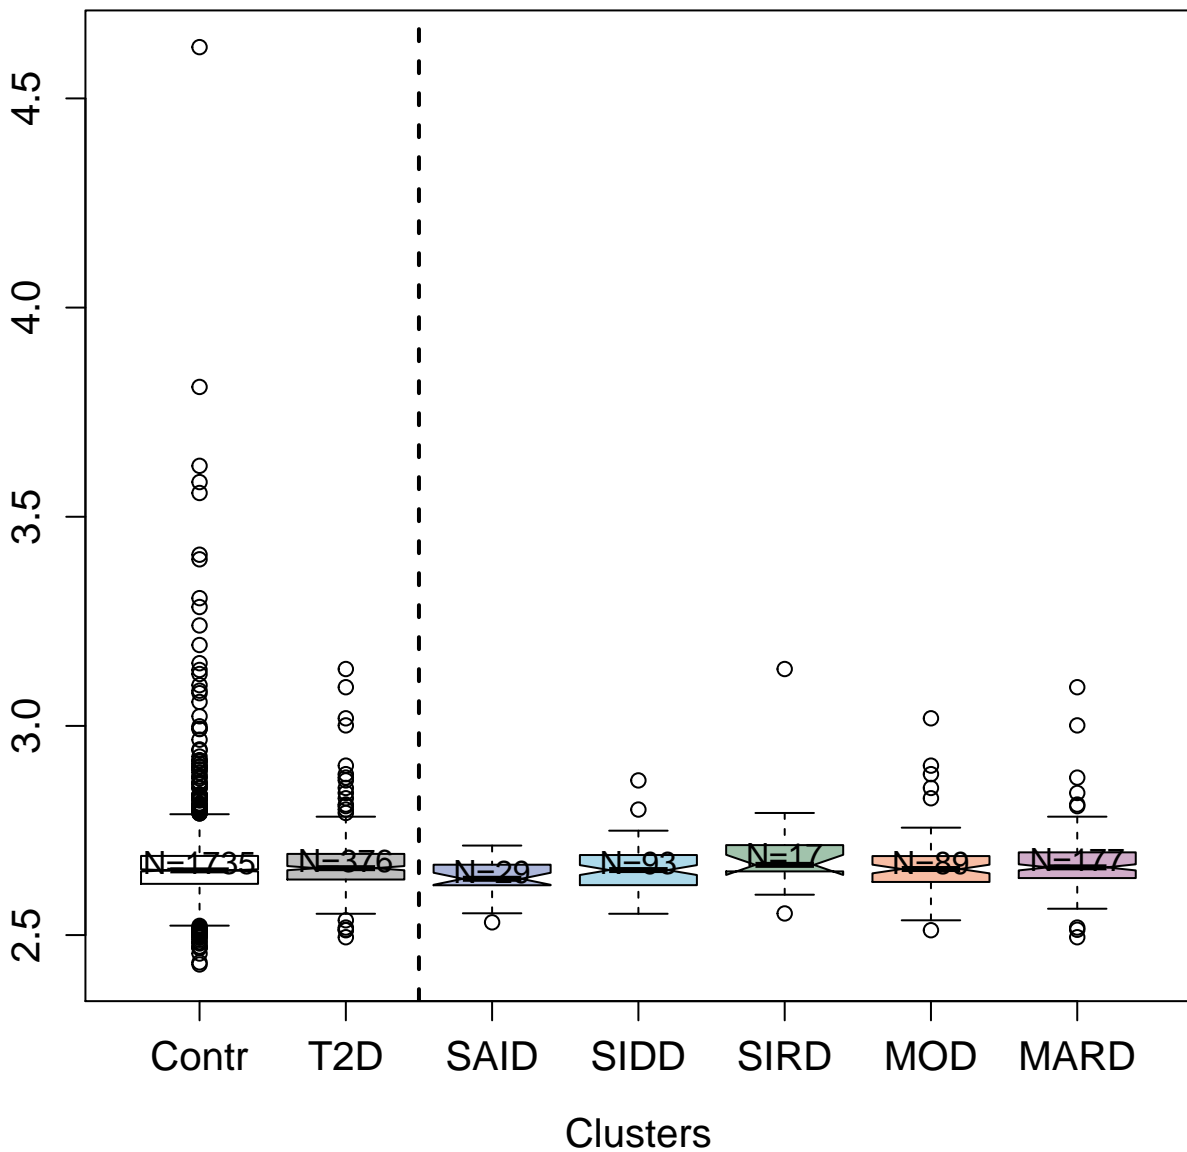

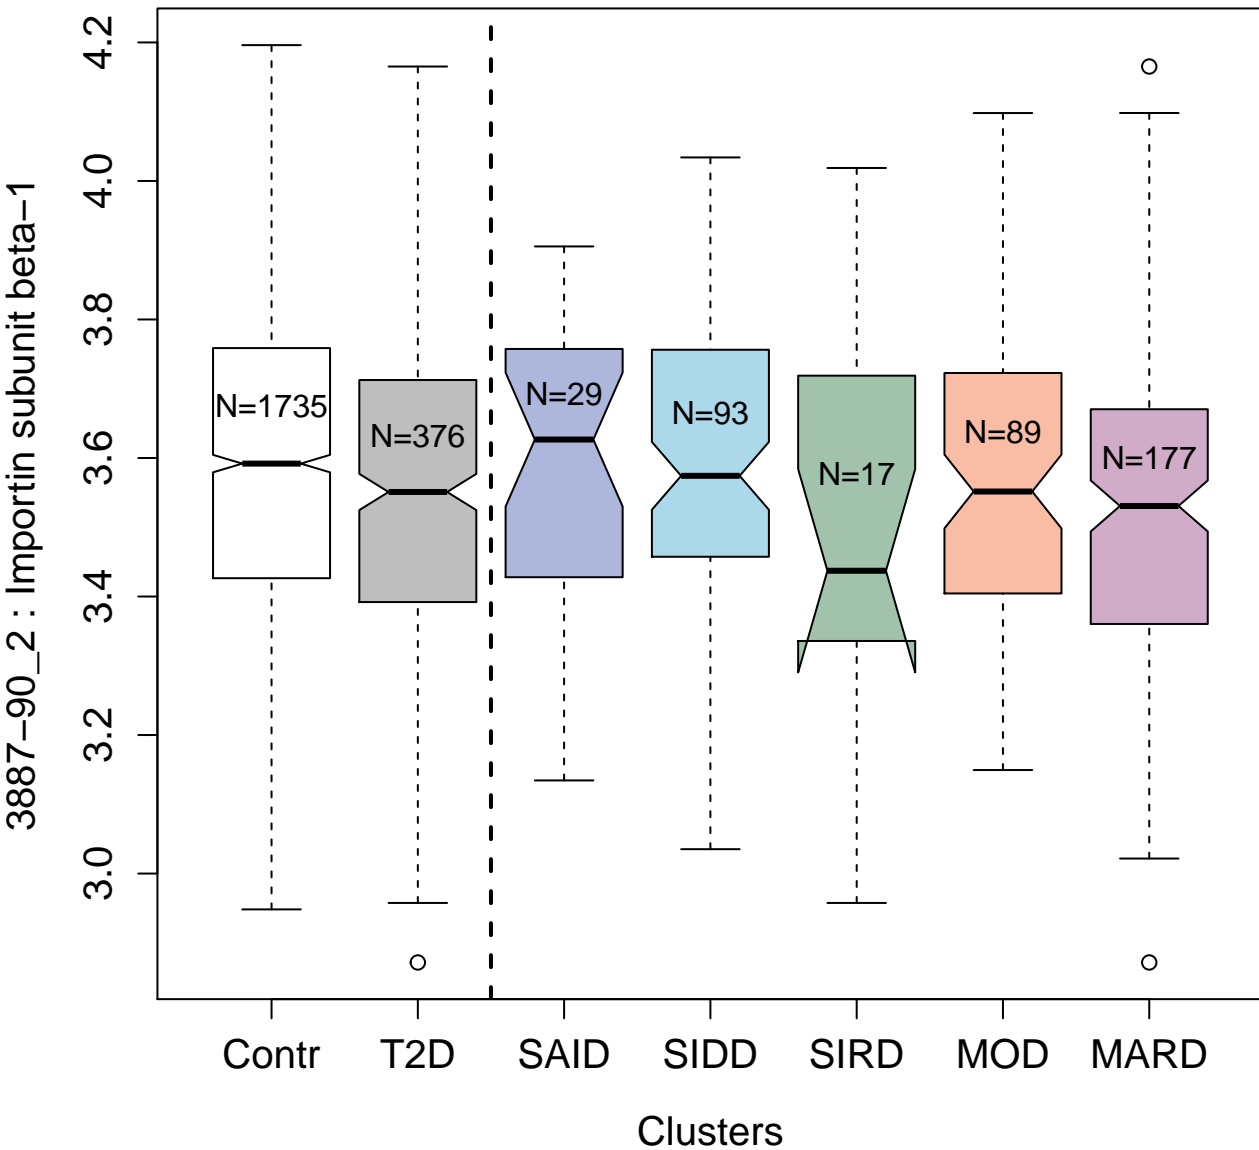

2751-16\_2 : Azurocidin

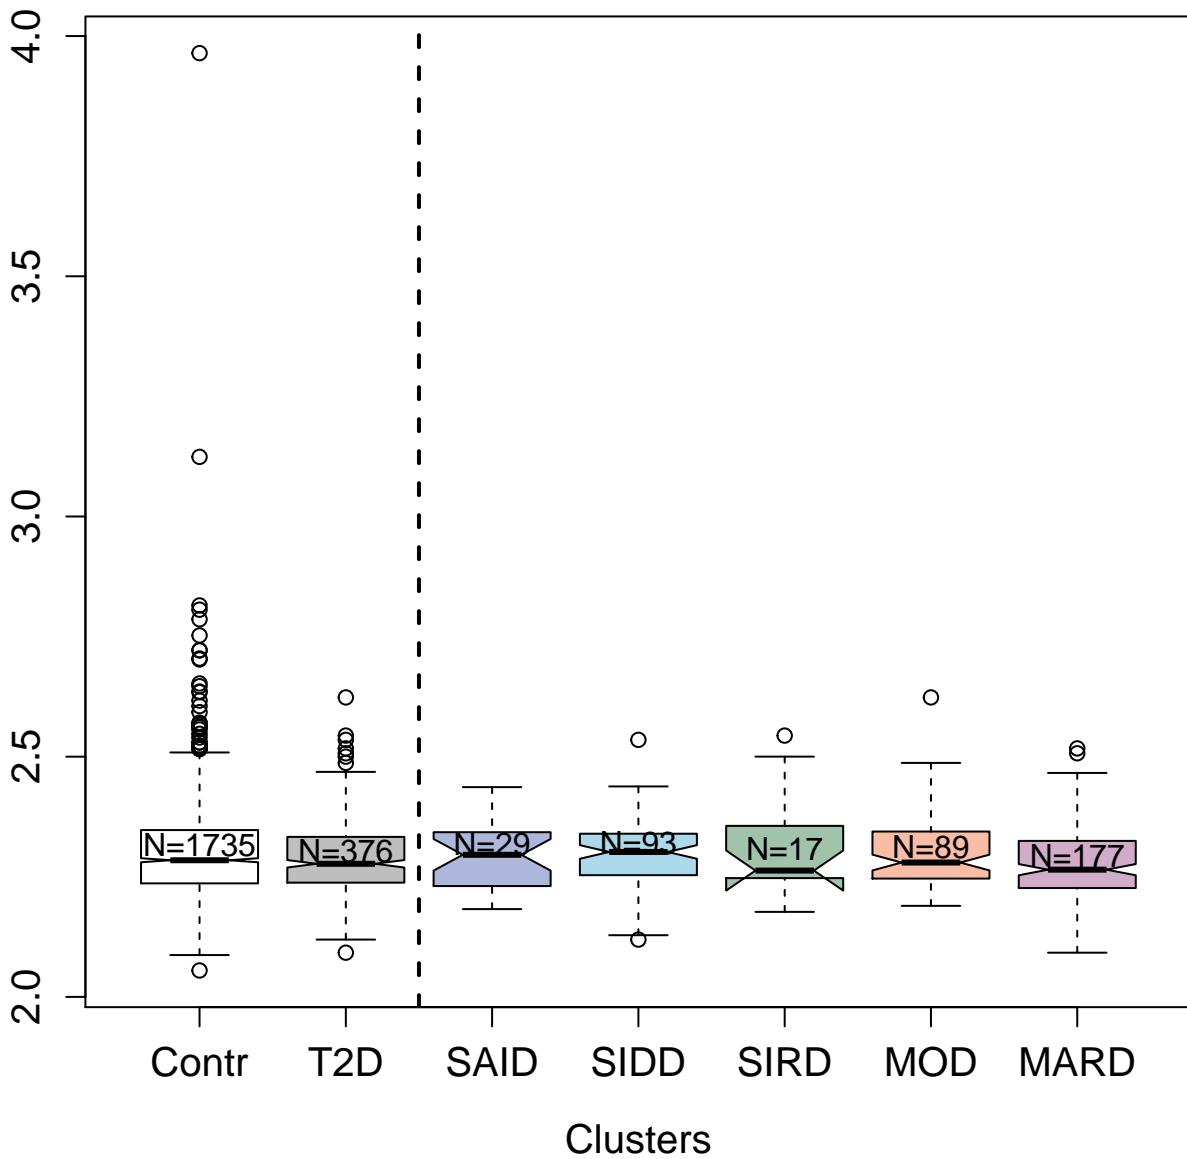

5825-49\_3 : Interferon gamma receptor 1

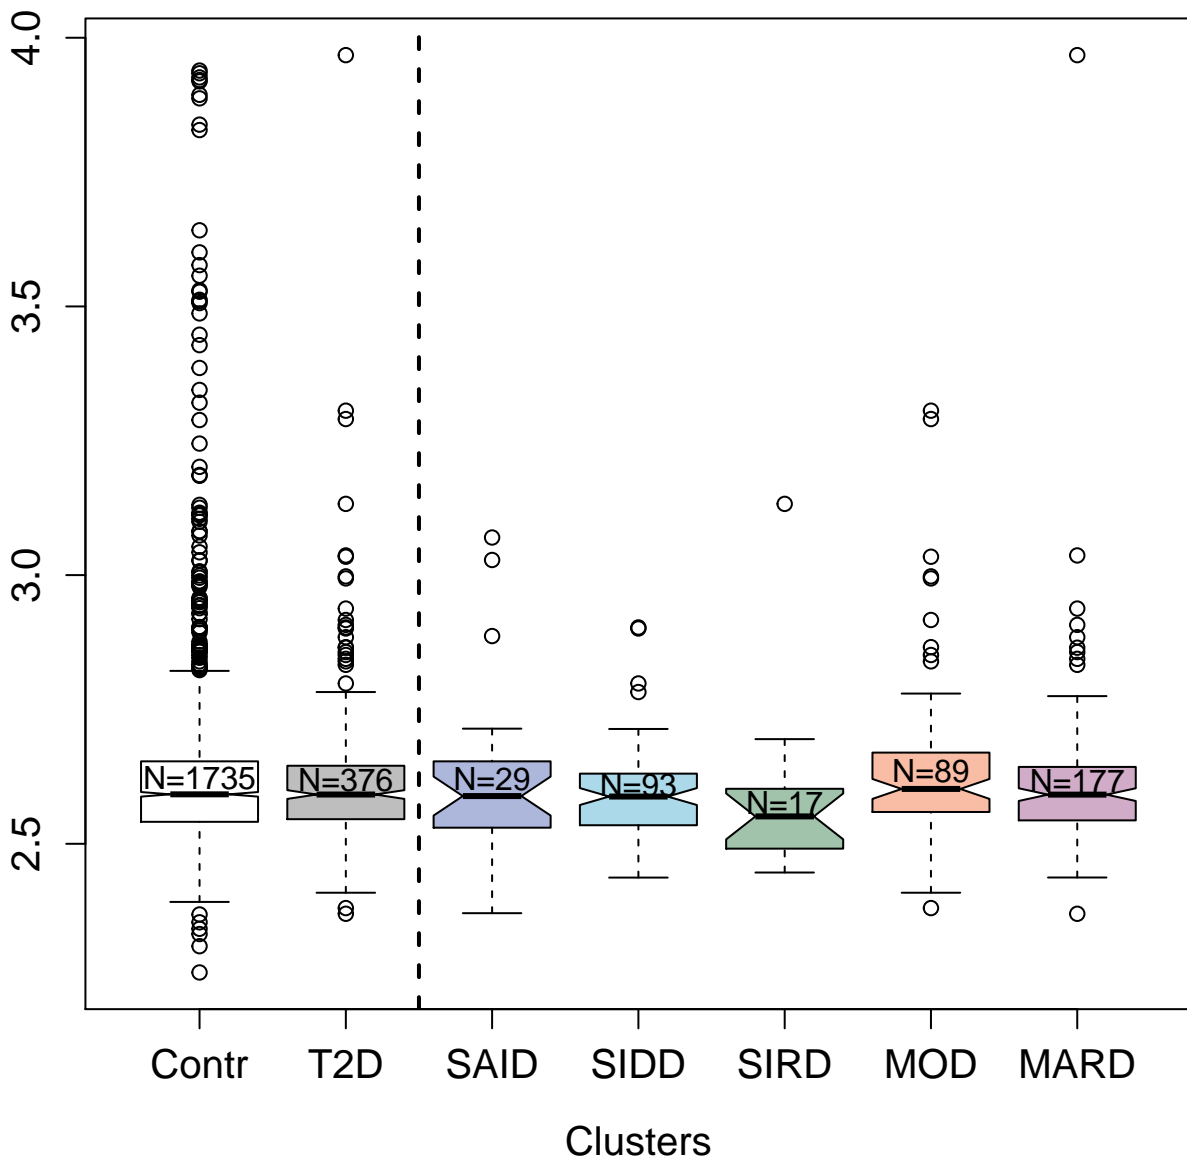

11089-7\_3 : Immunoglobulin A

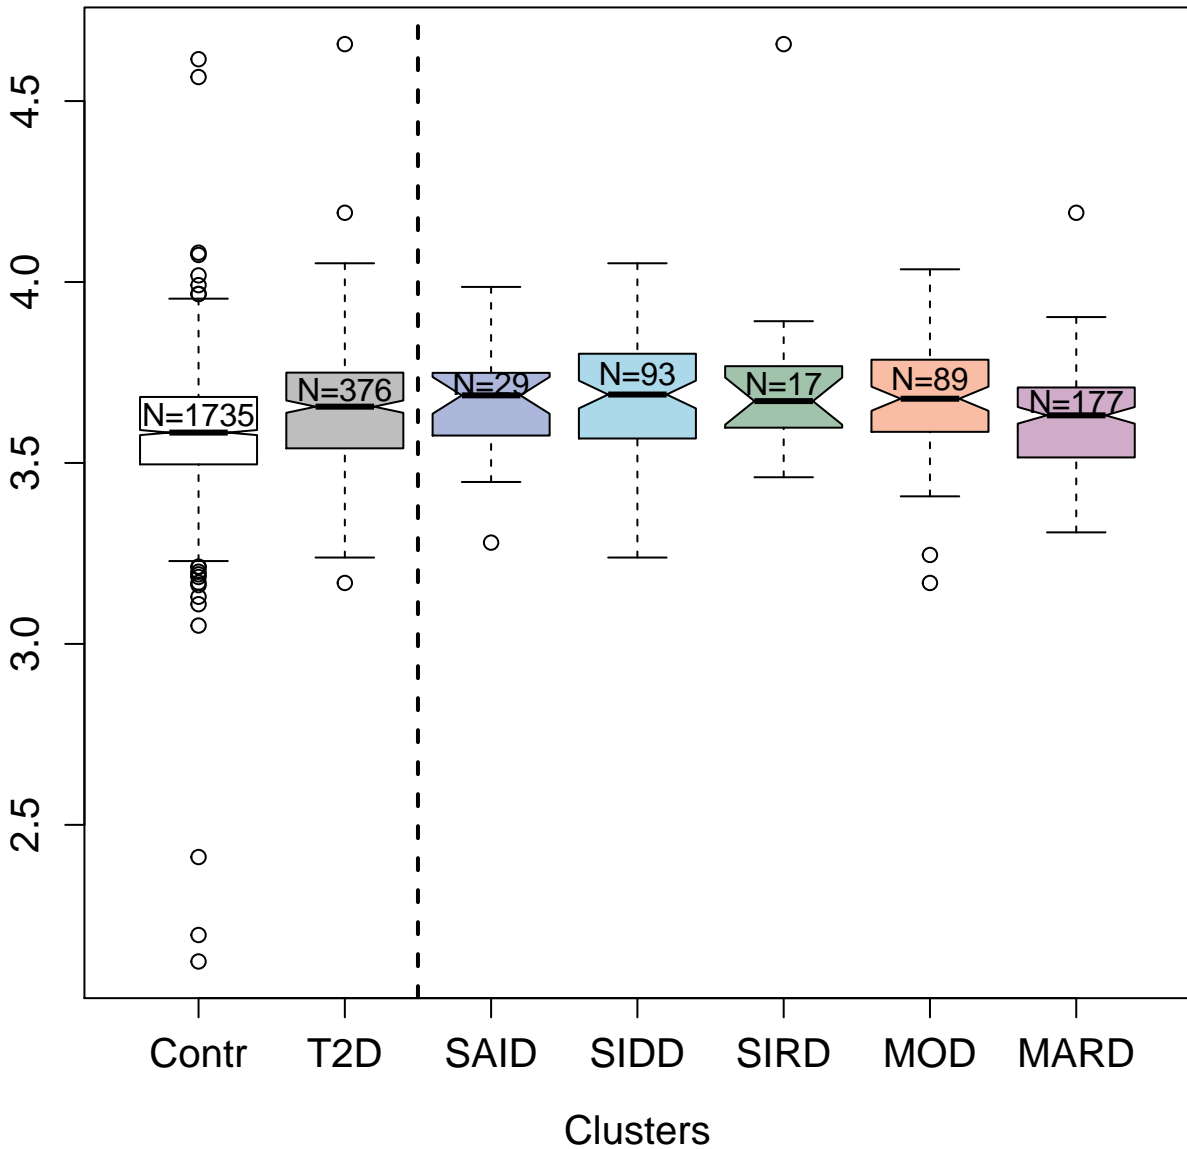

4328-2\_2 : Brother of CDO

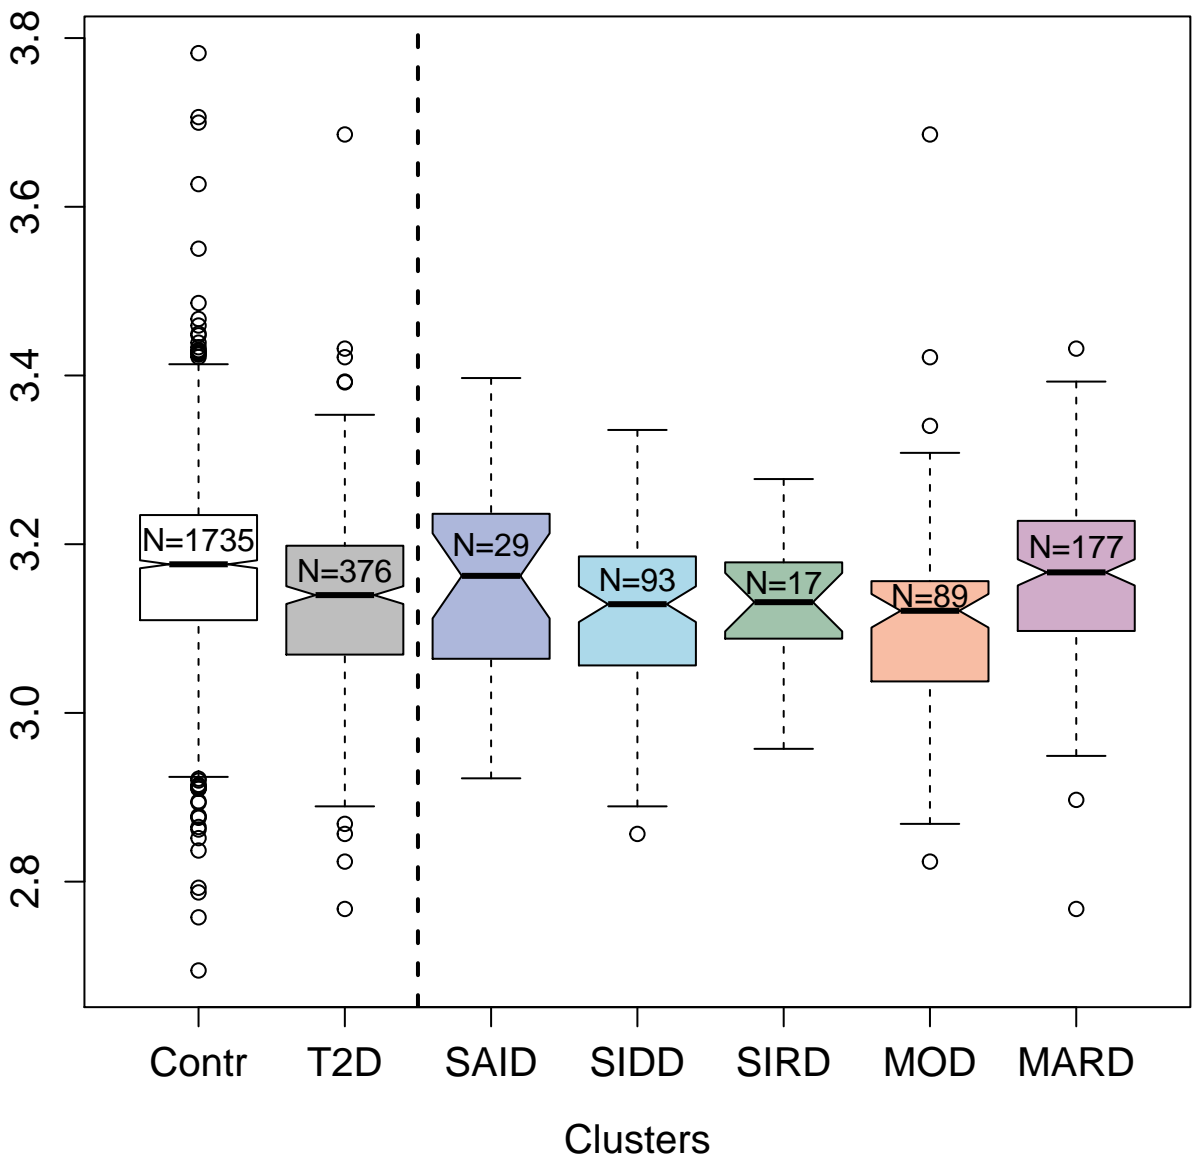

4984-83\_1 : S-formylglutathione hydrolase

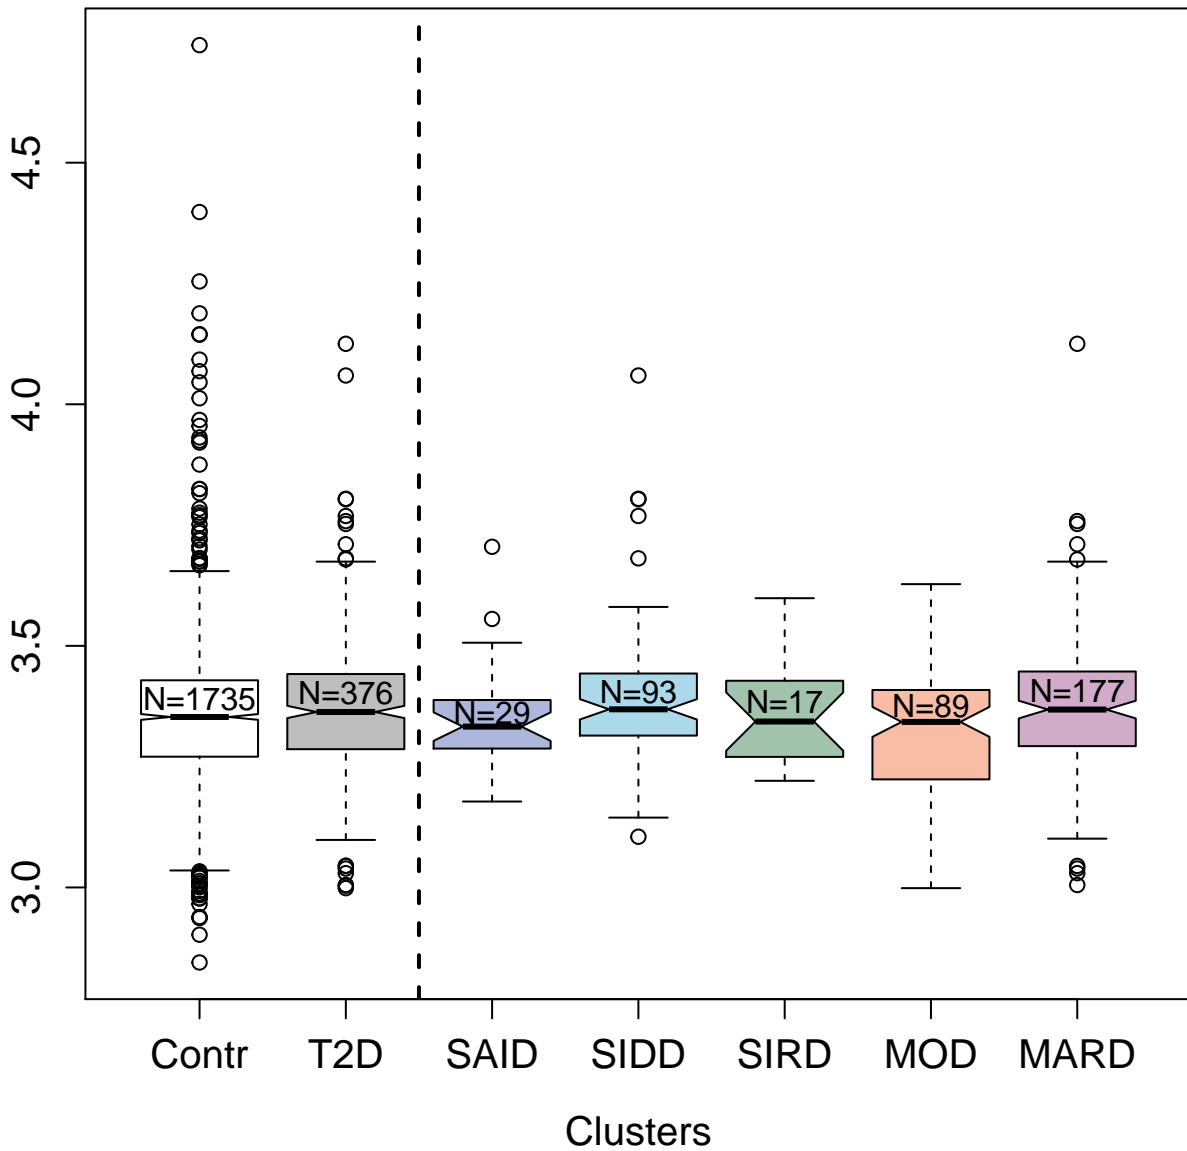



5801-72\_3 : beta-nerve growth factor

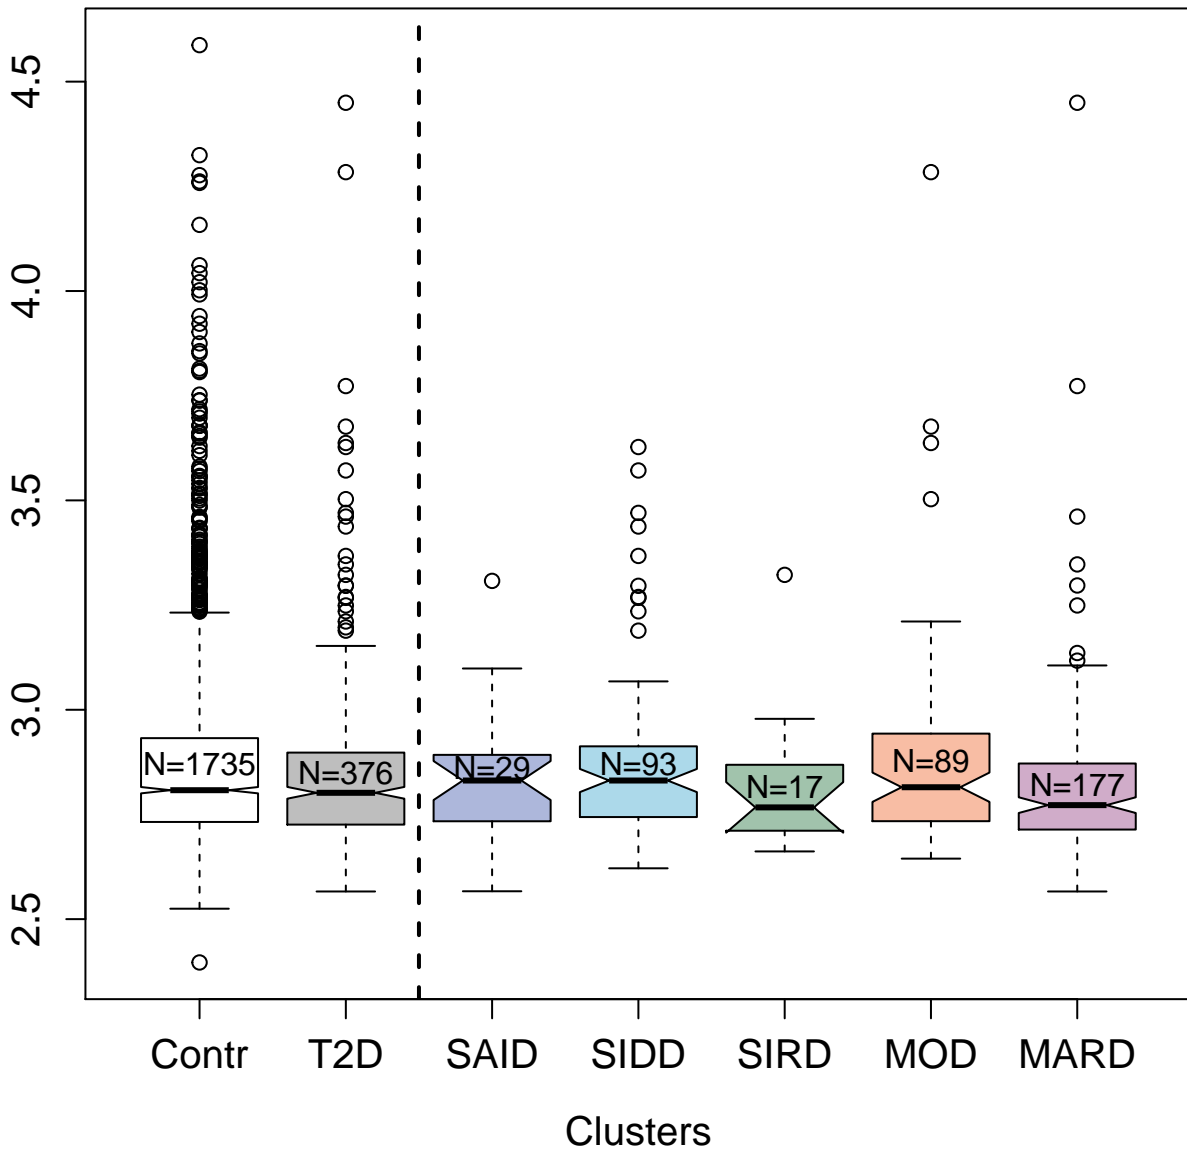

4979-34\_2 : Dermatopontin

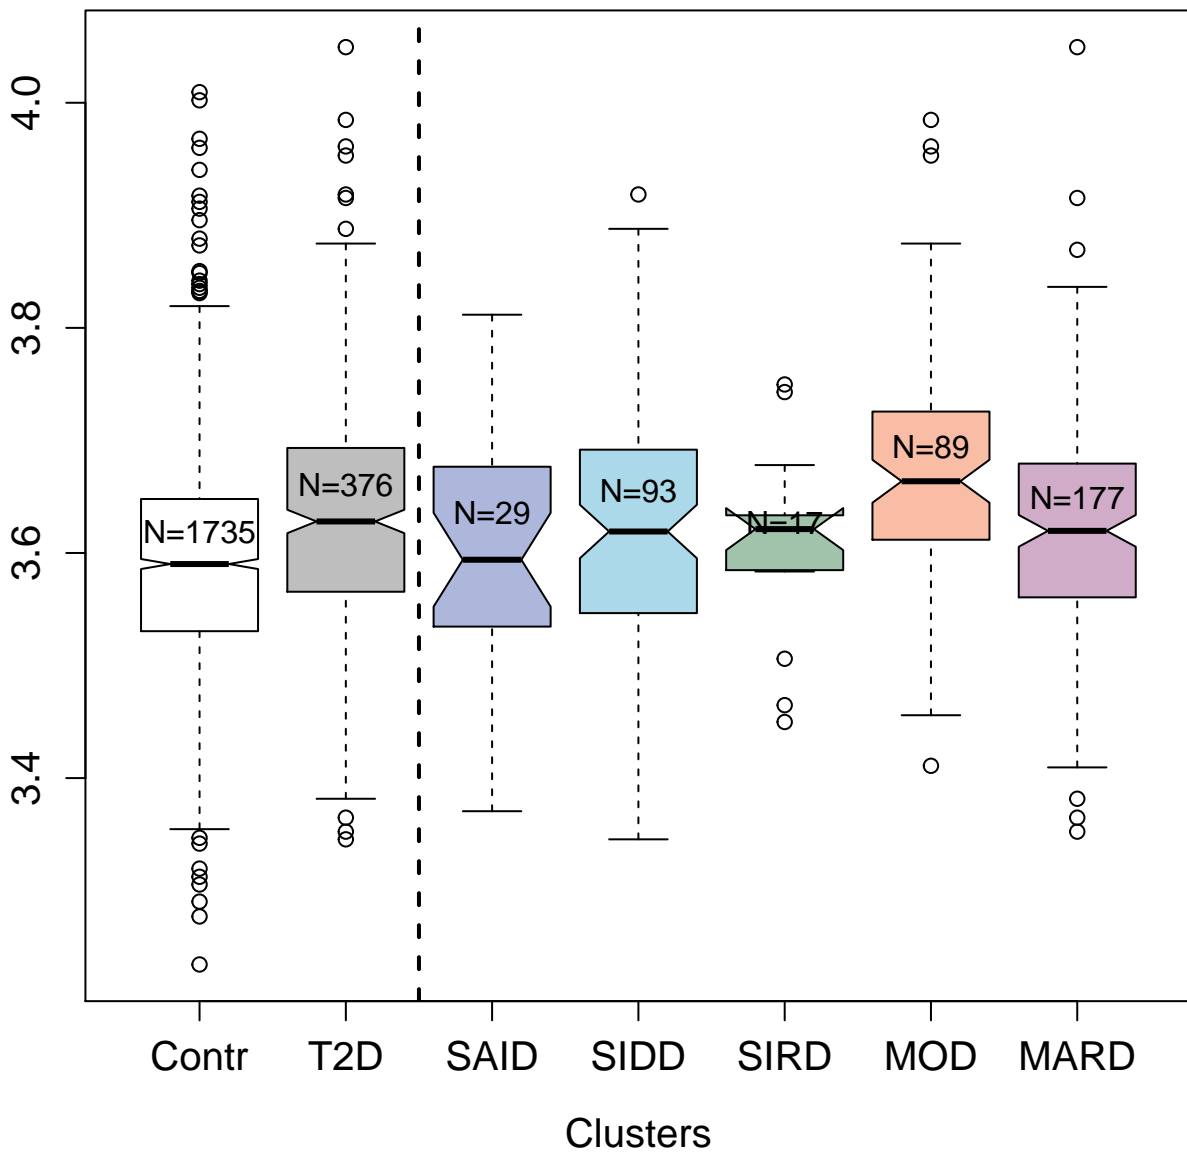

4923-79\_1 : Muellerman-inhibiting factor

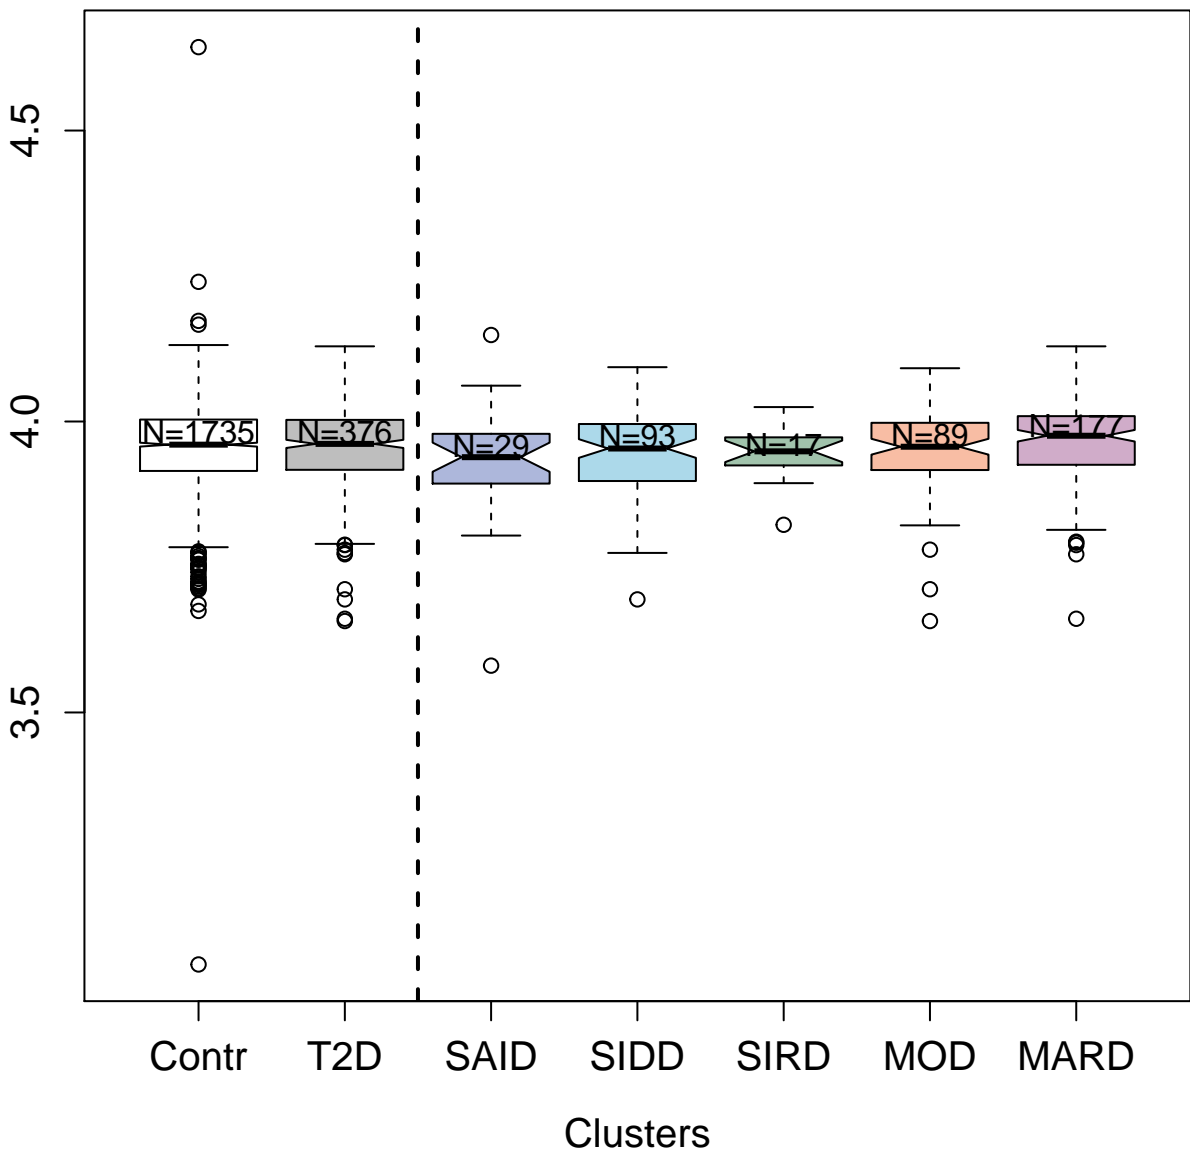

3521-16\_2 : Thyroid Stimulating Hormone

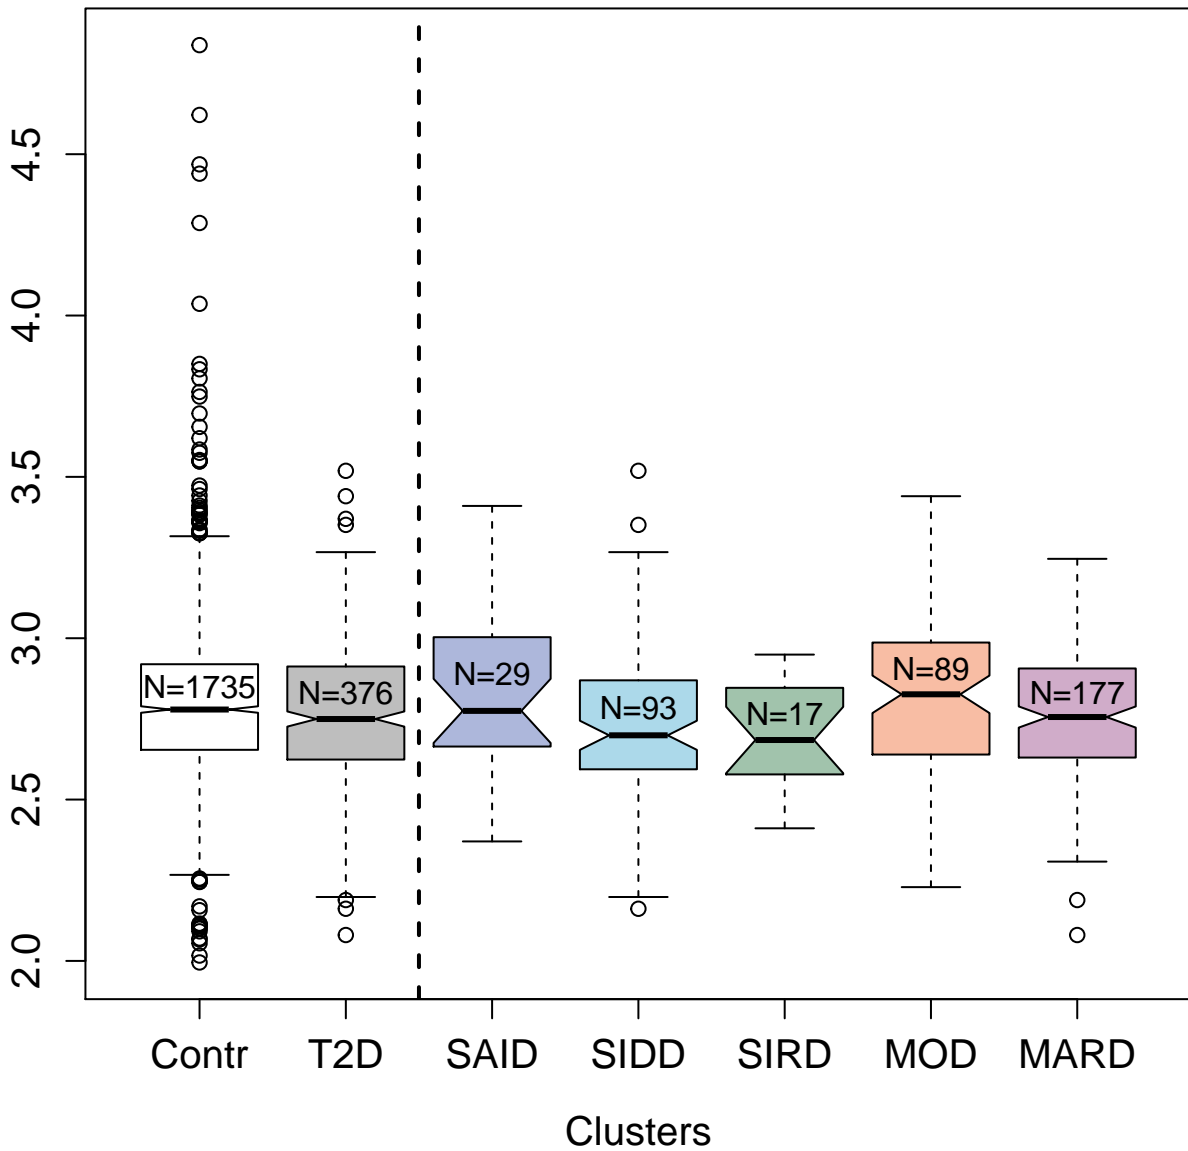

5252-33\_3 : Dual 3':5'-cyclic-AMP and -GMP  
phosphodiesterase 11A

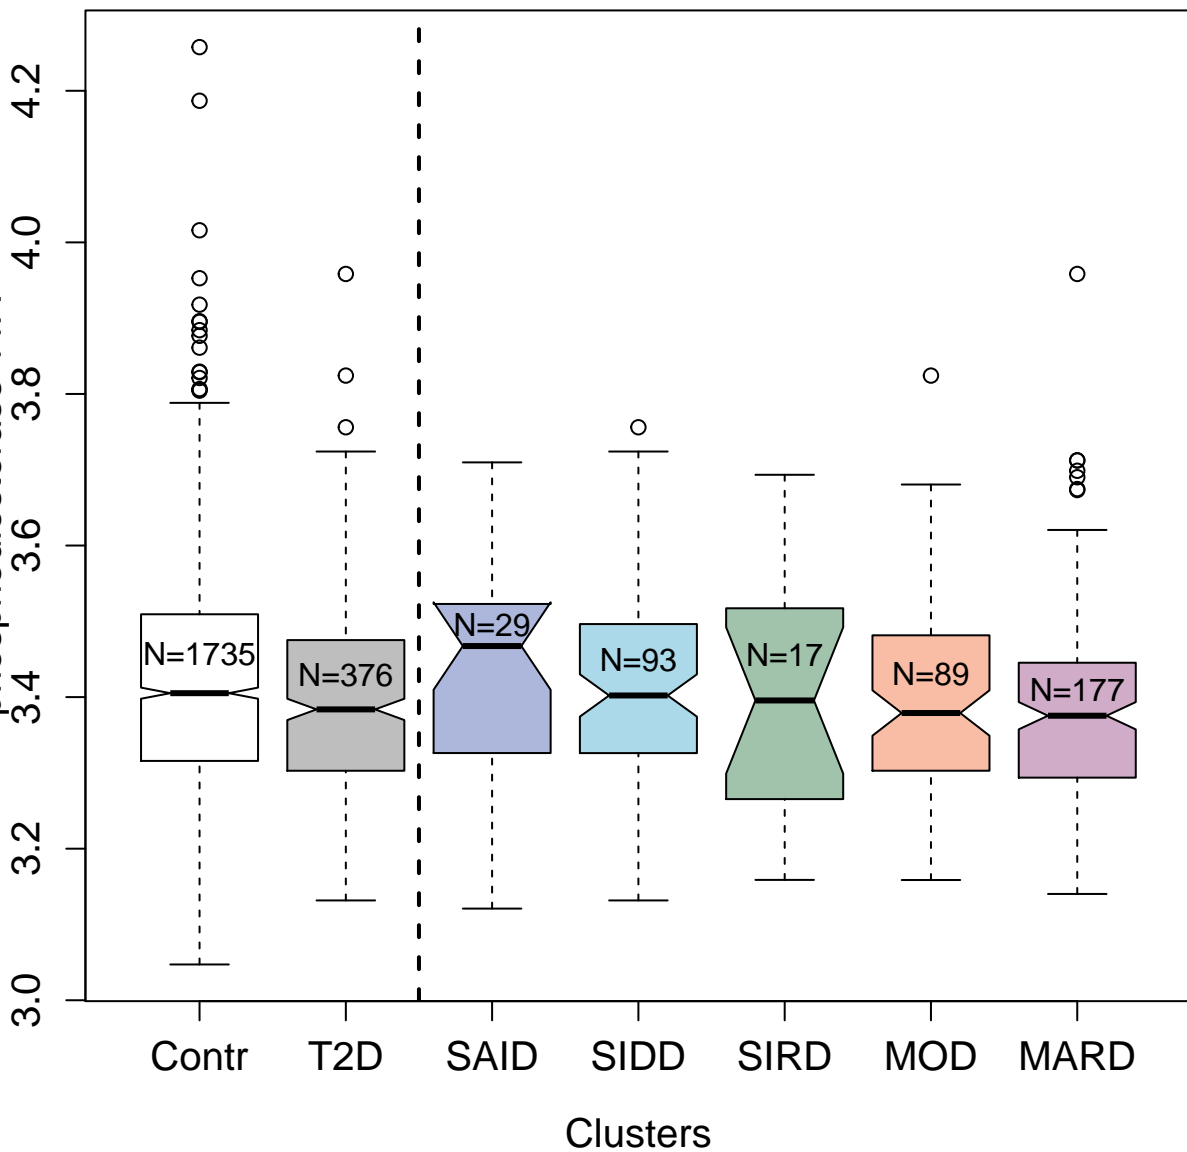

4487-1\_1 : Fibroblast growth factor 7

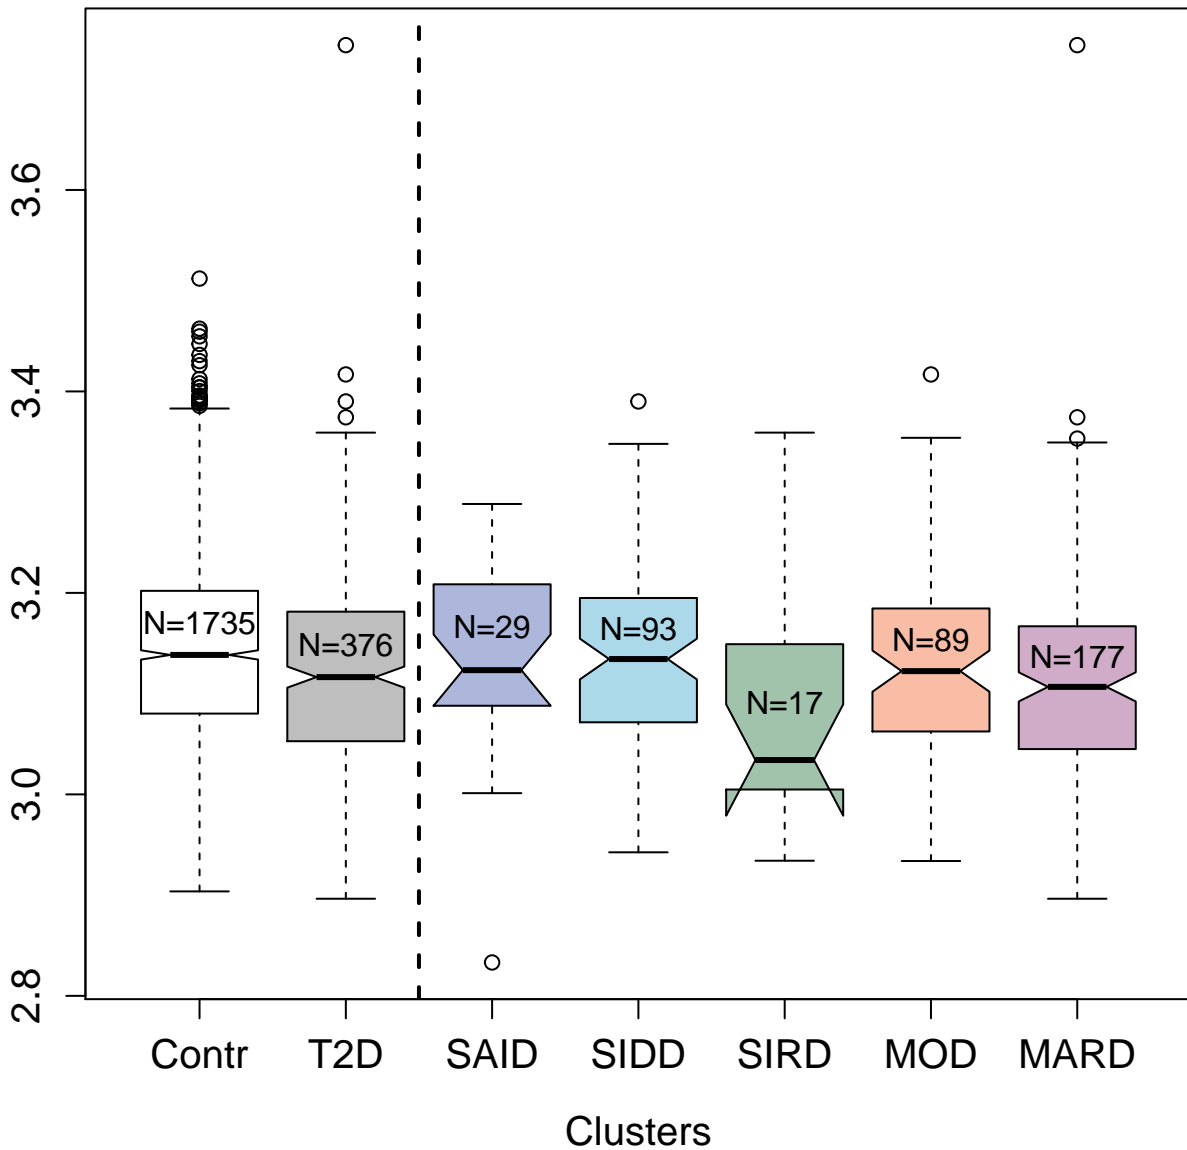

2948-58\_2 : Growth hormone receptor

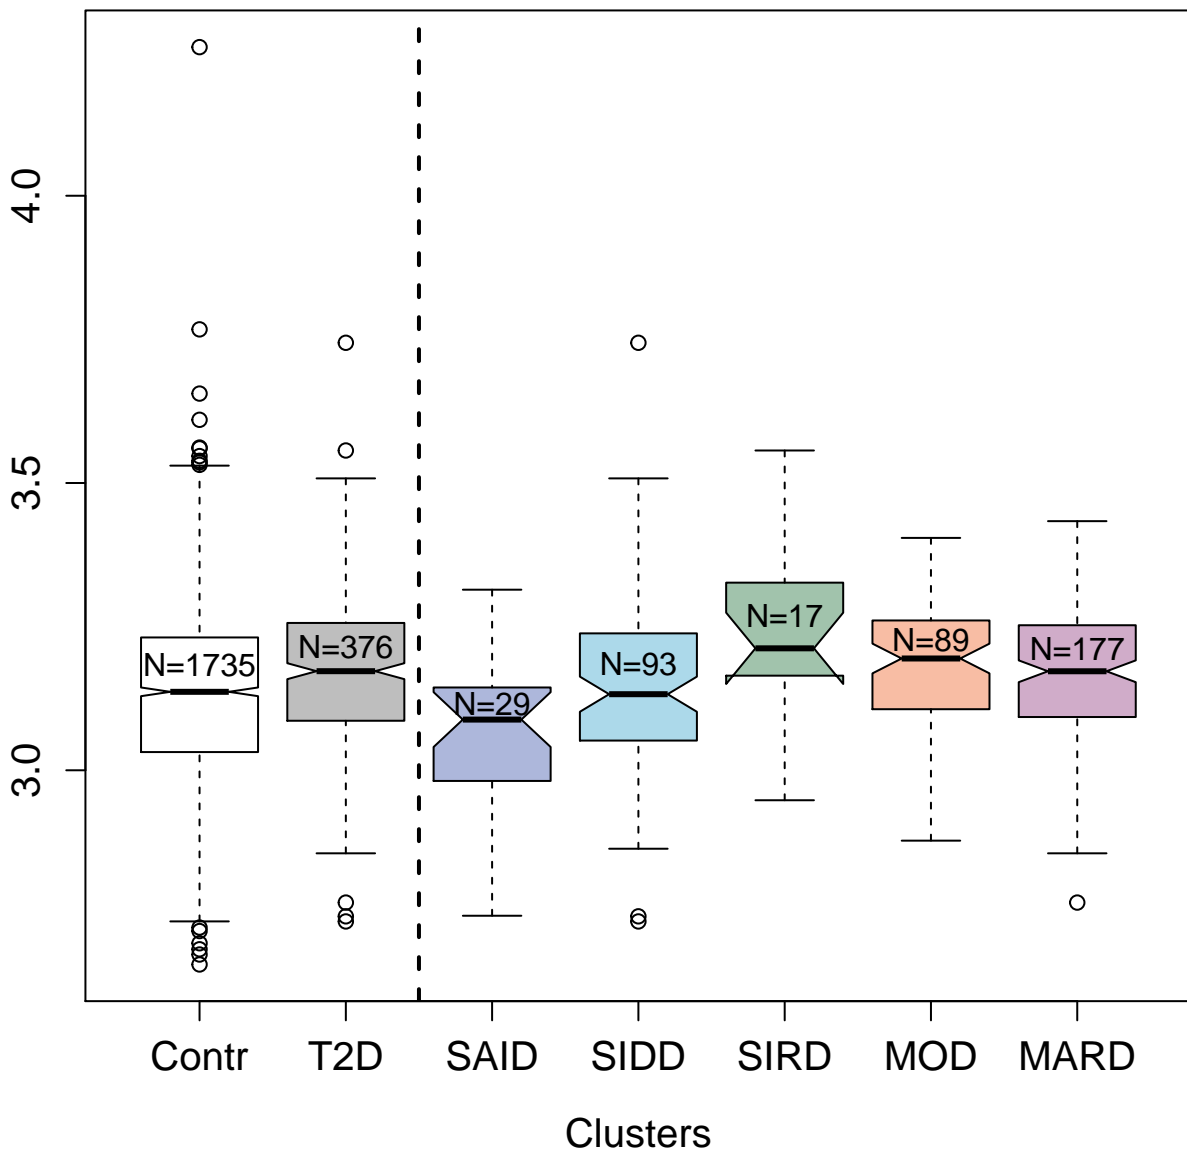

5178-5\_3 : High affinity cAMP-specific  
3';5'-cyclic phosphodiesterase 7A

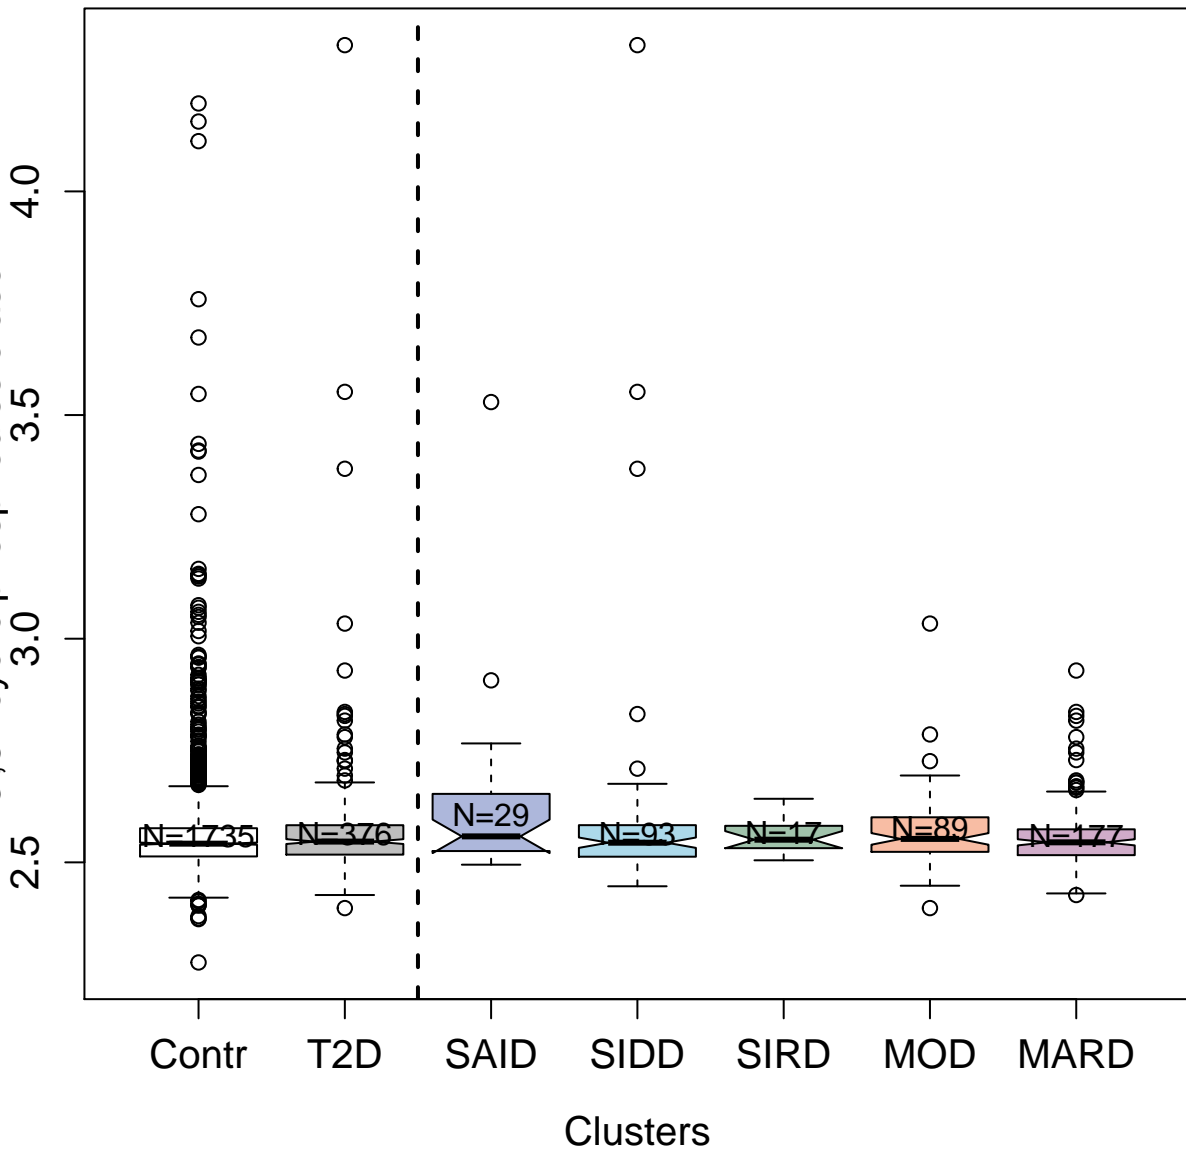



3581-53\_3 : Alpha-2-HS-glycoprotein

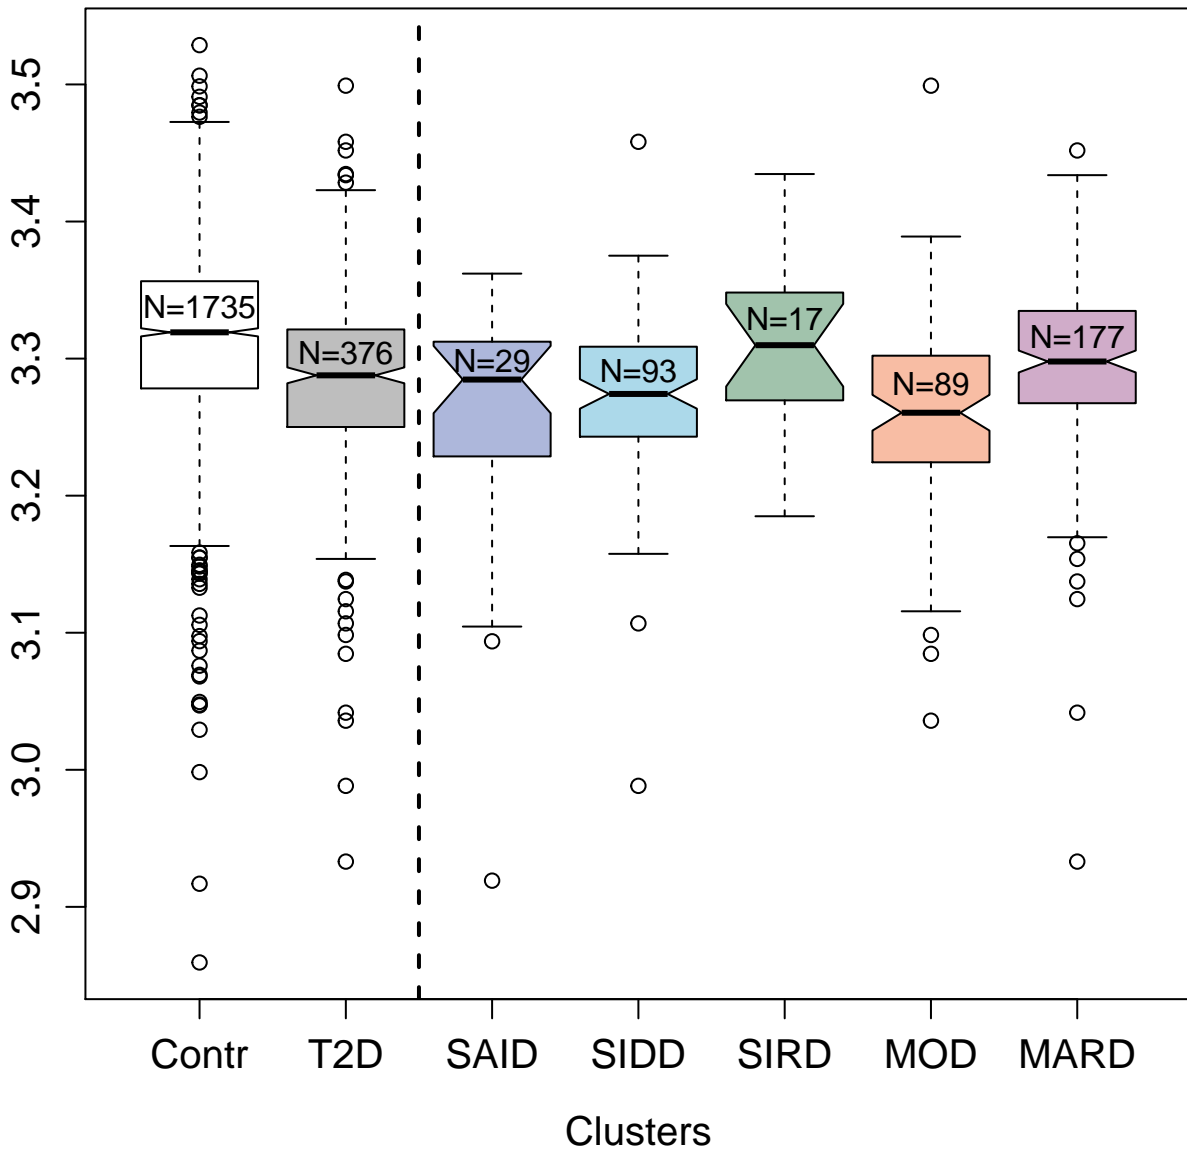

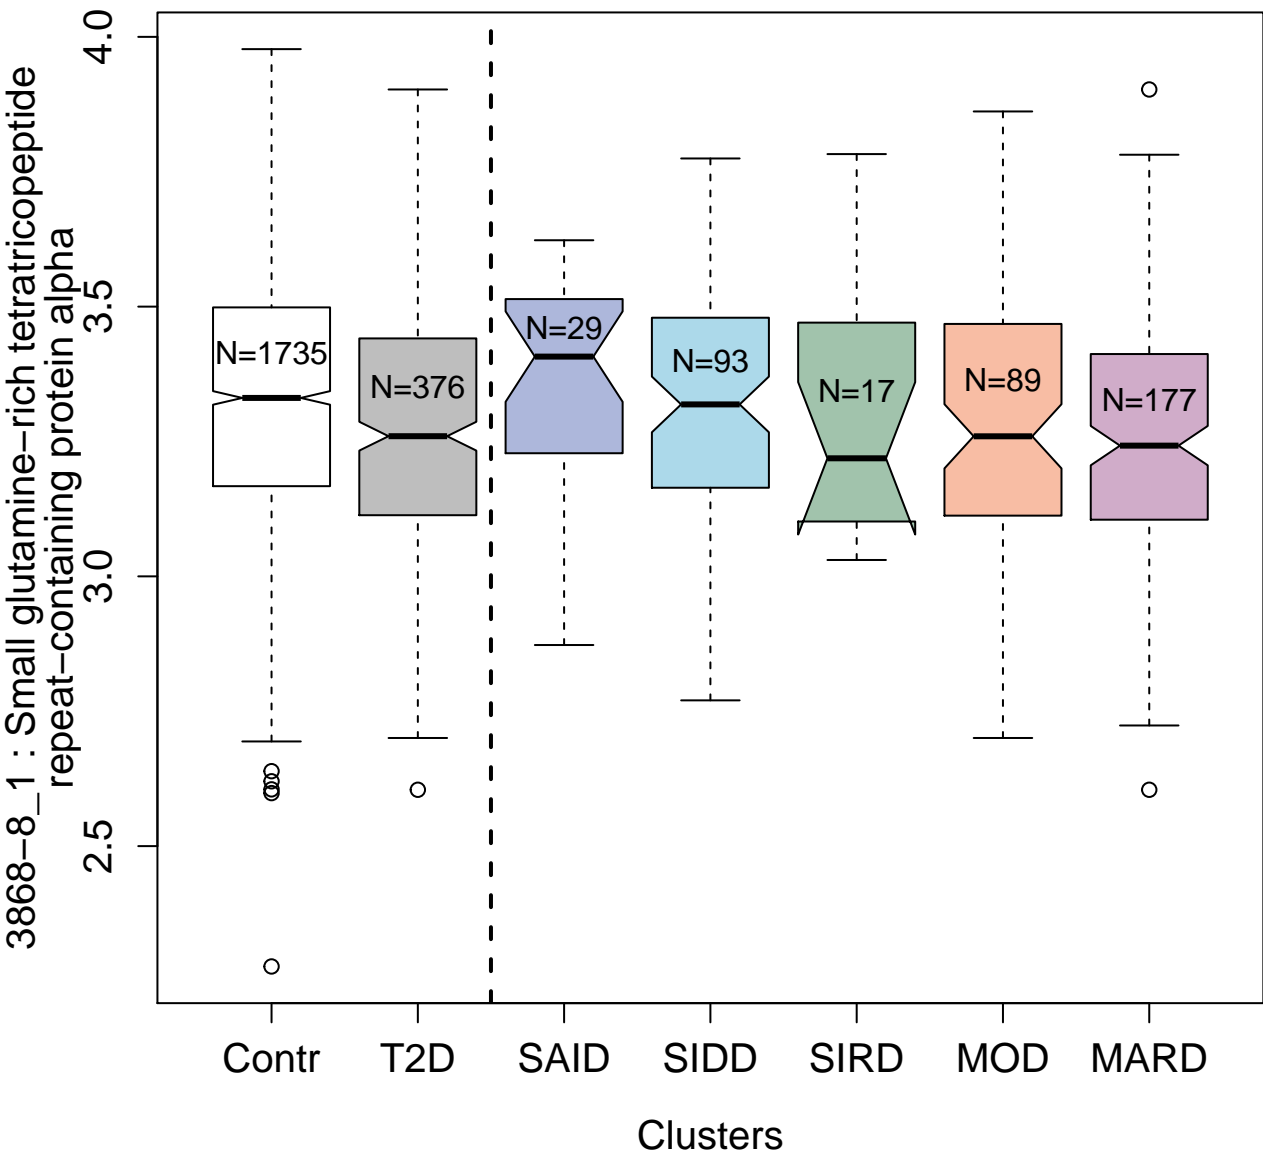

5356-2\_3 : Macrophage migration inhibitory factor

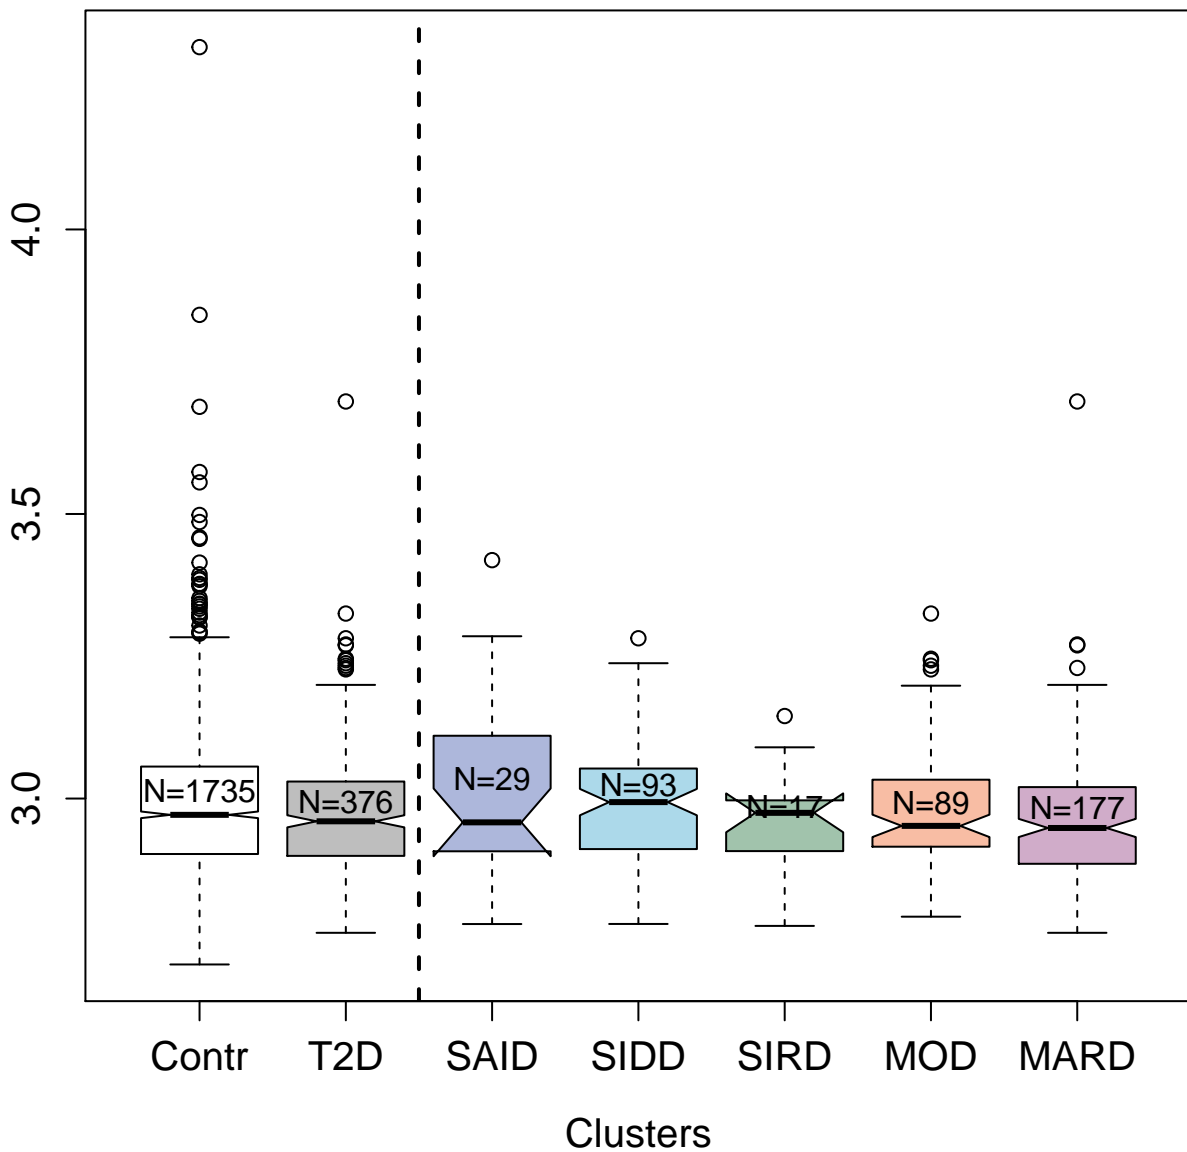

2611-72\_2 : Tyrosine-protein kinase receptor  
TYRO3

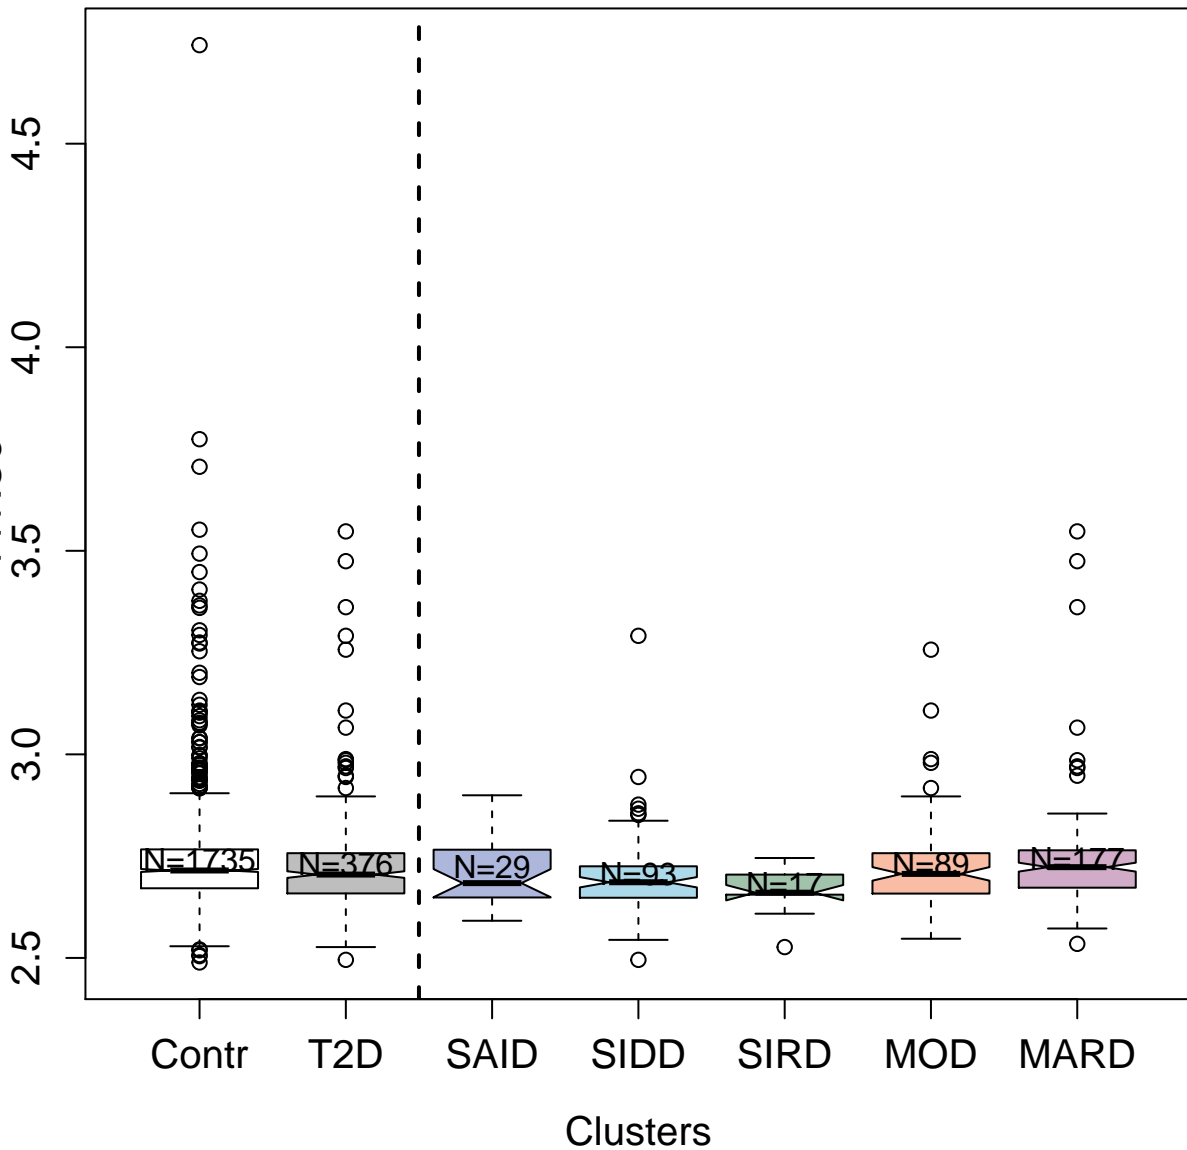

5029-3\_1 : Prolyl endopeptidase FAP

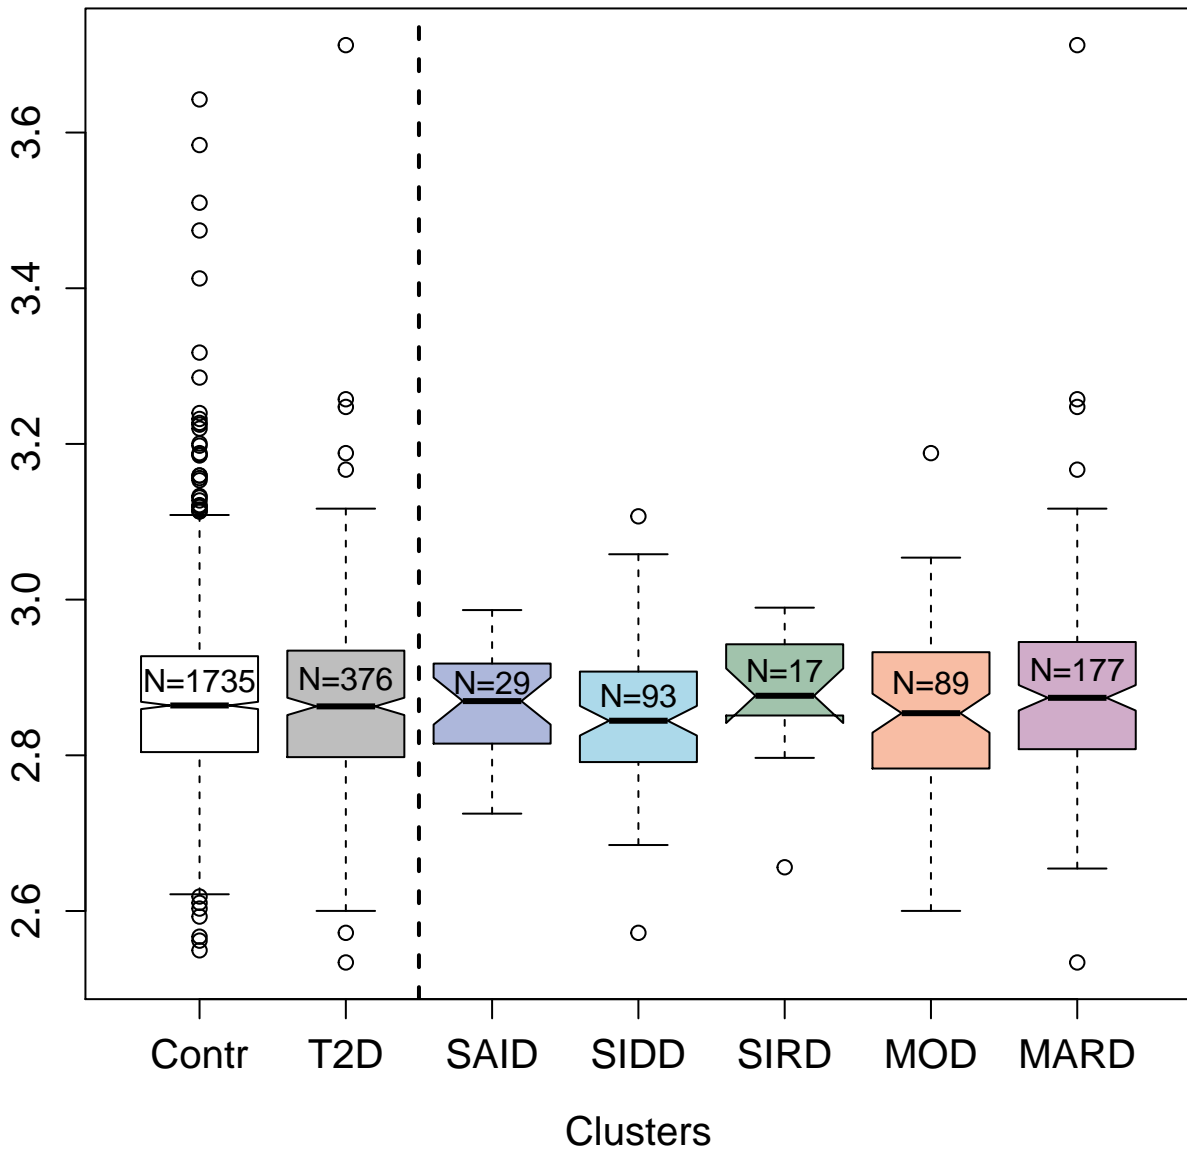

2962-50\_2 : Parathyroid hormone-related protein

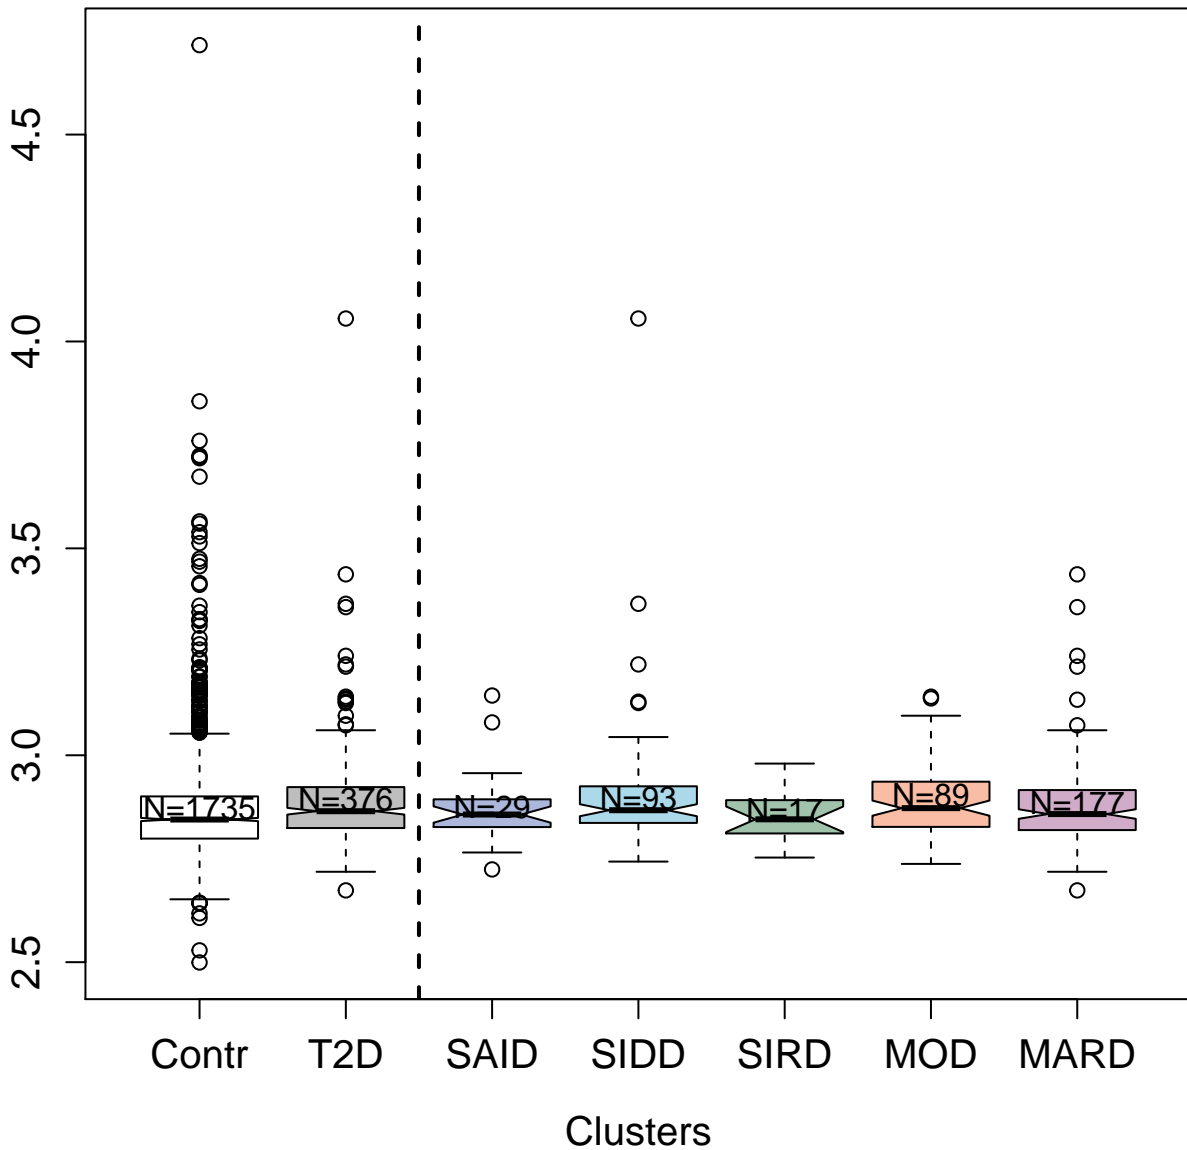

4917-62\_1 : Integrin alpha-V: beta-5 complex

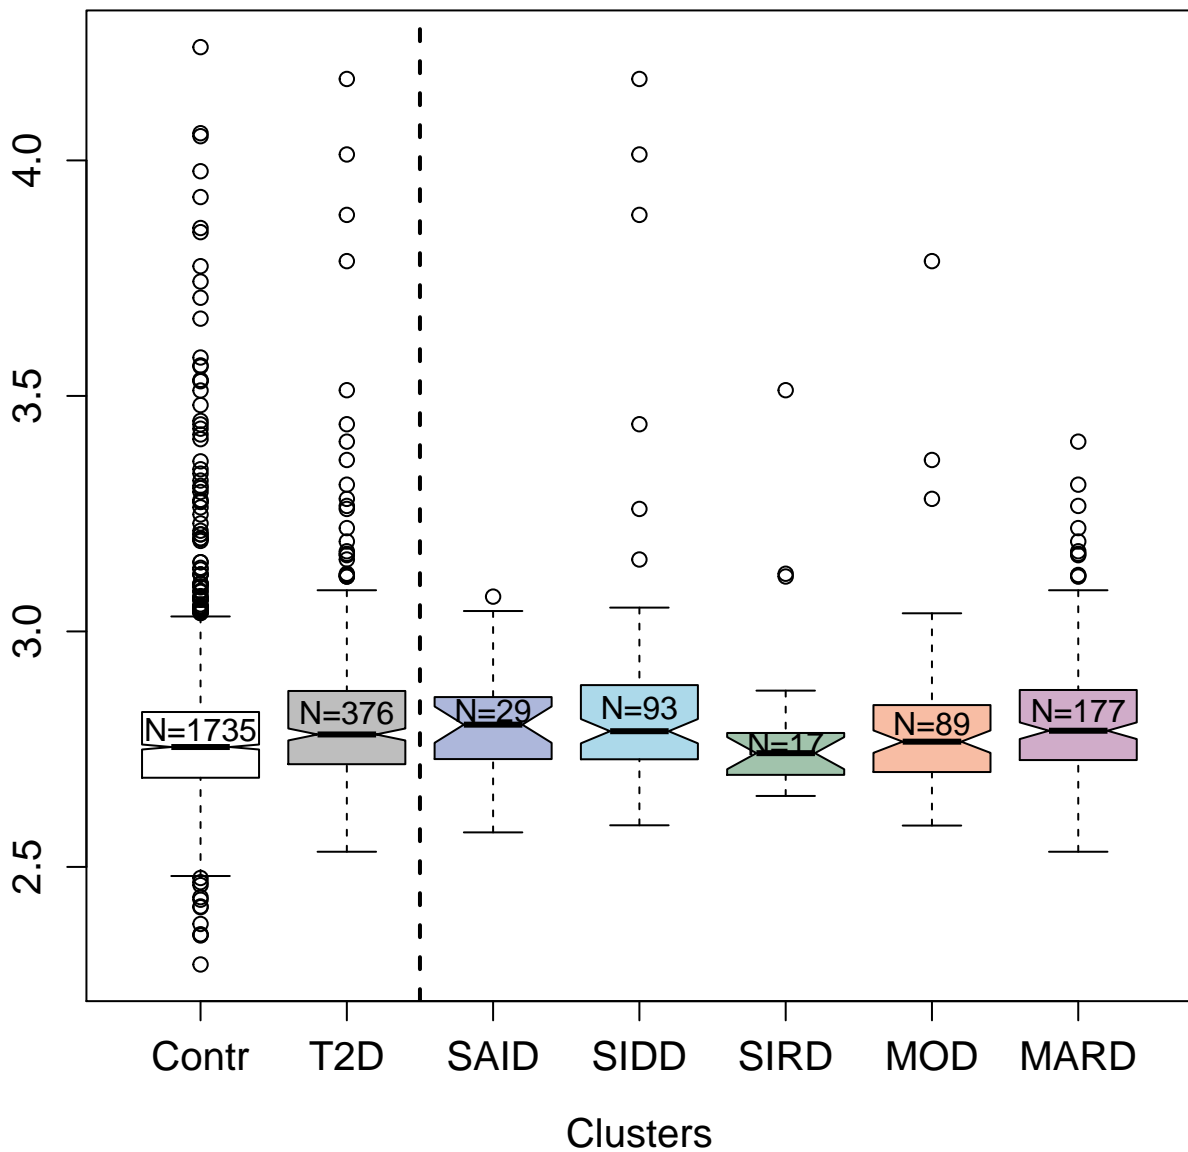

2946-52\_2 : Complement factor D

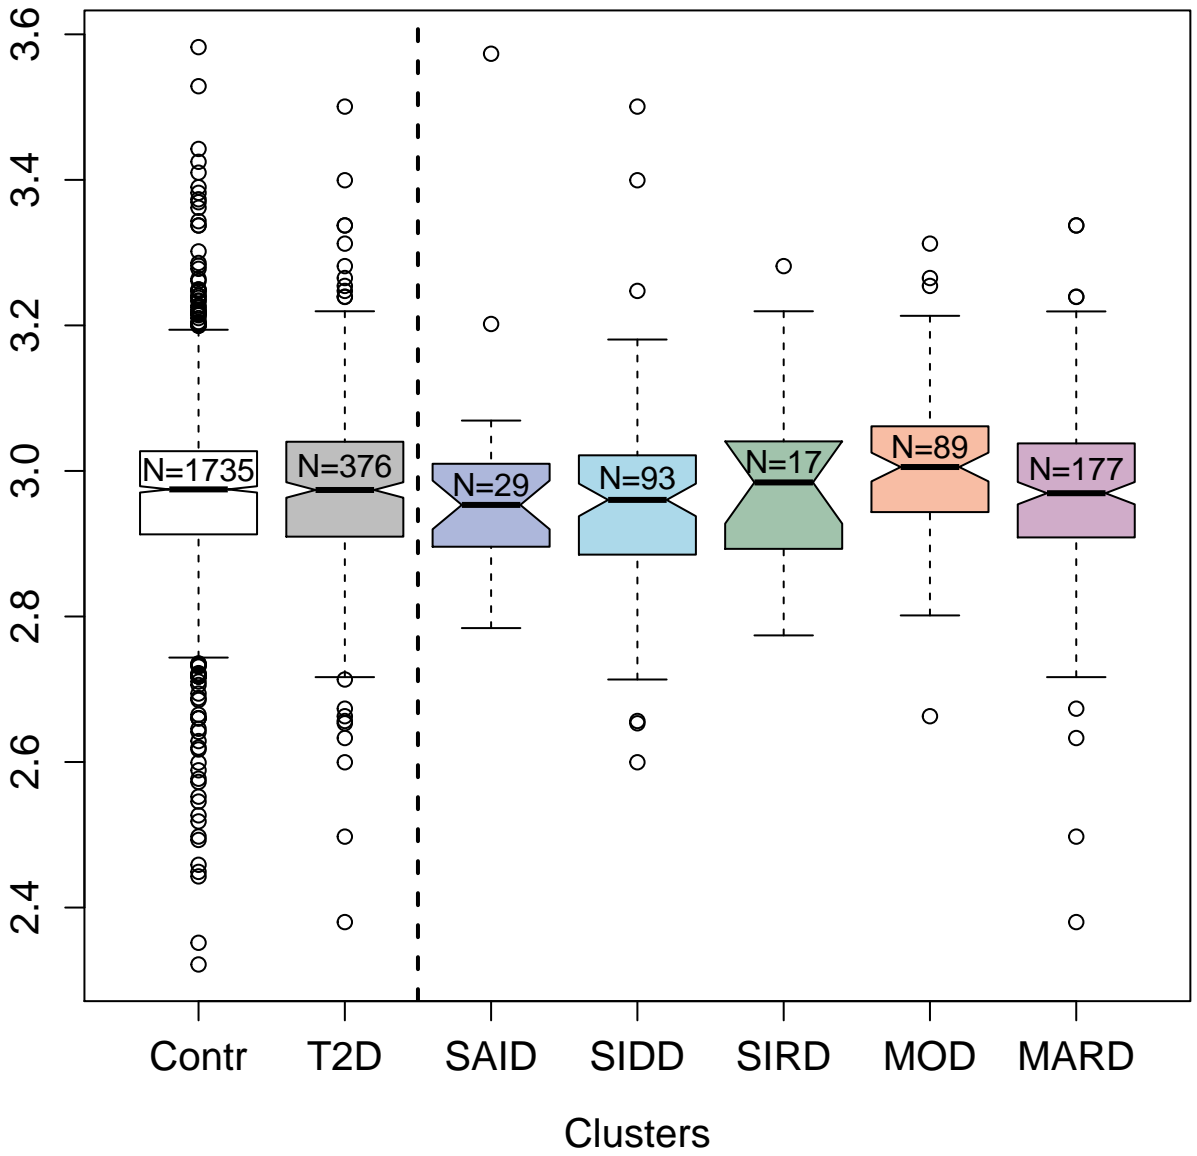



2677-1\_1 : Epidermal growth factor receptor

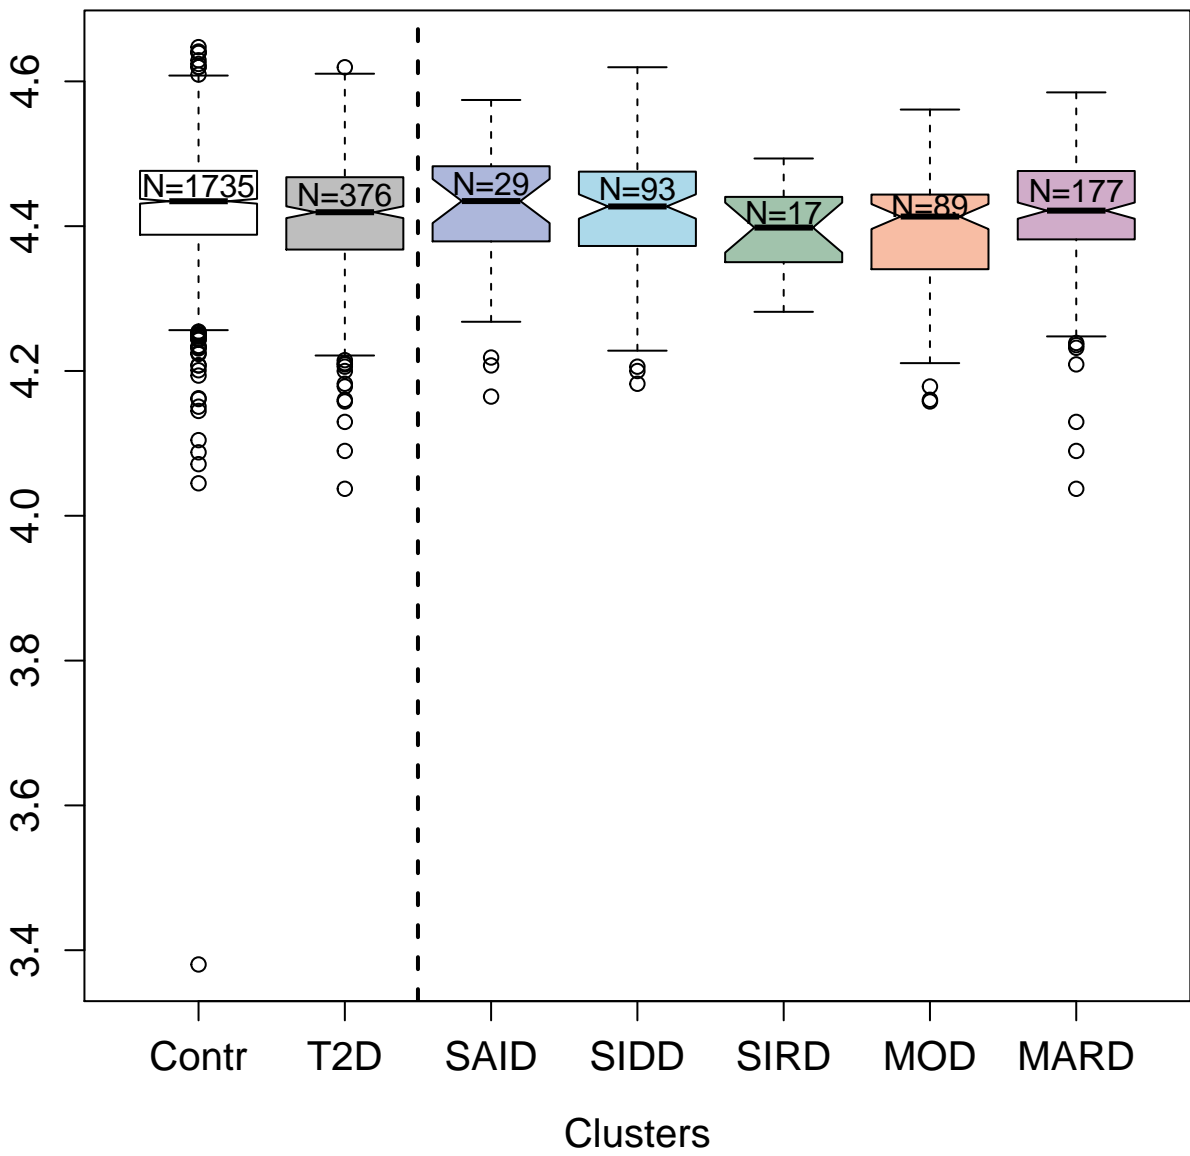

2915-6\_2 : Proliferating cell nuclear antigen

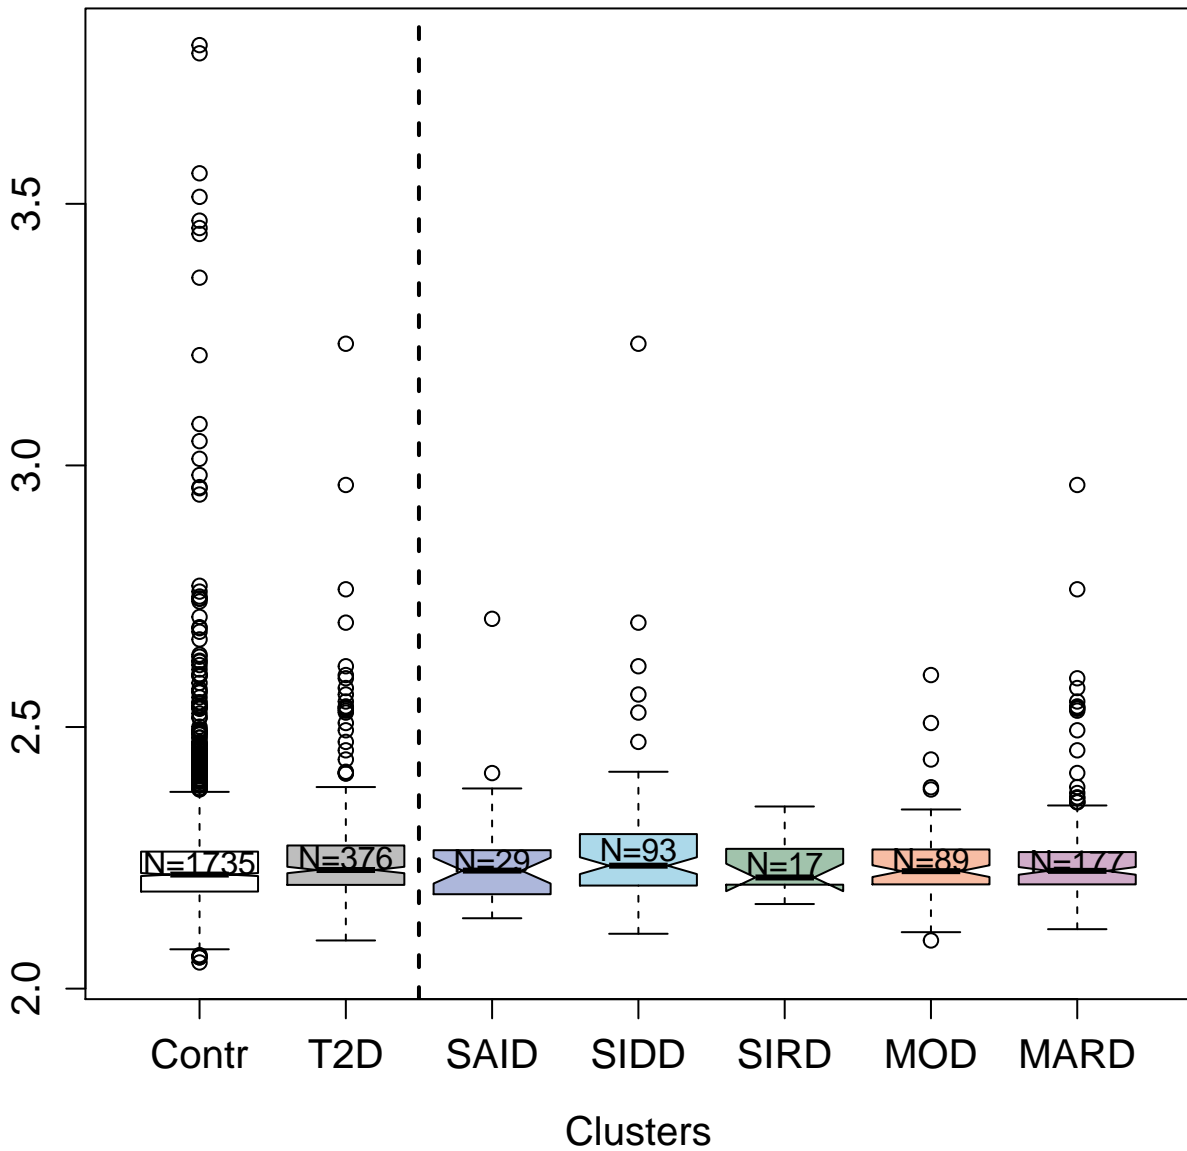

3210-1\_2 : Methionine aminopeptidase1

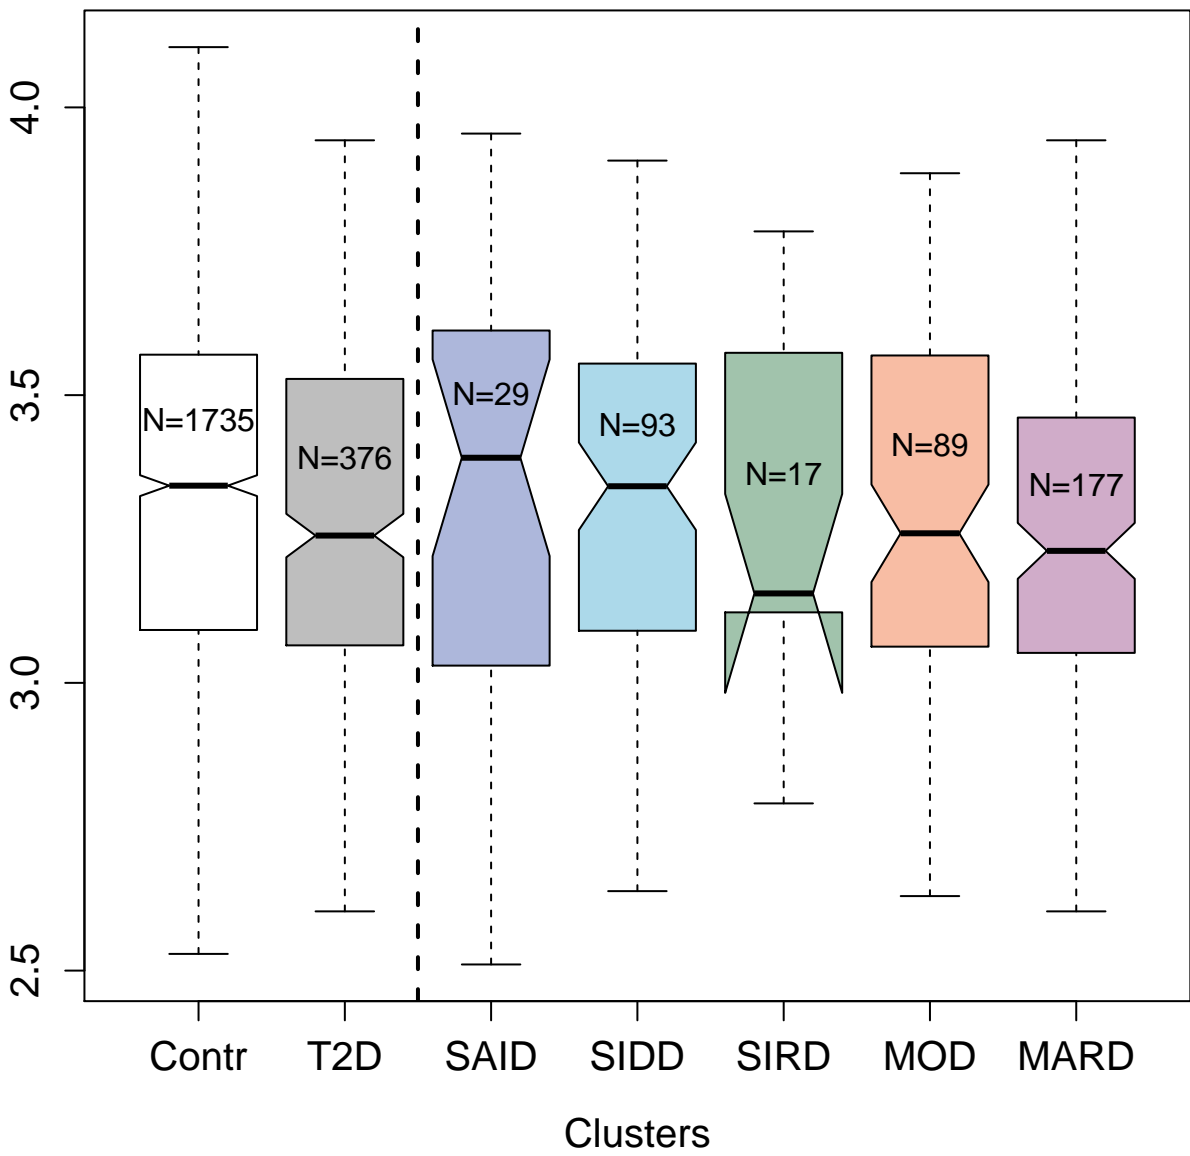

5254-69\_3 : cGMP-inhibited 3':5'-cyclic  
phosphodiesterase A

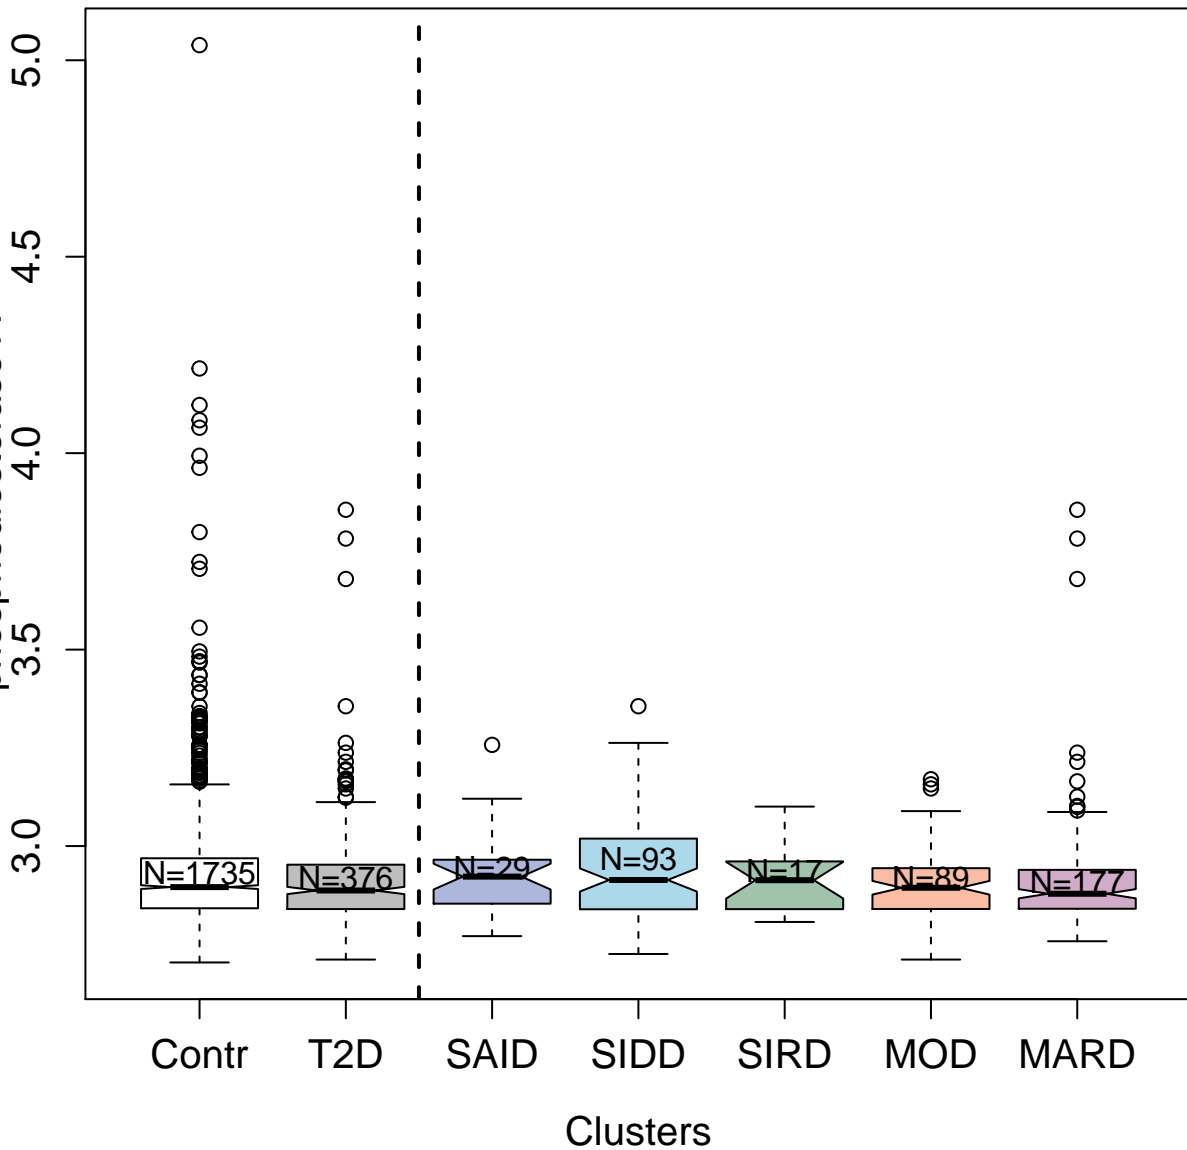

2986-49\_2 : Gro-beta/gamma

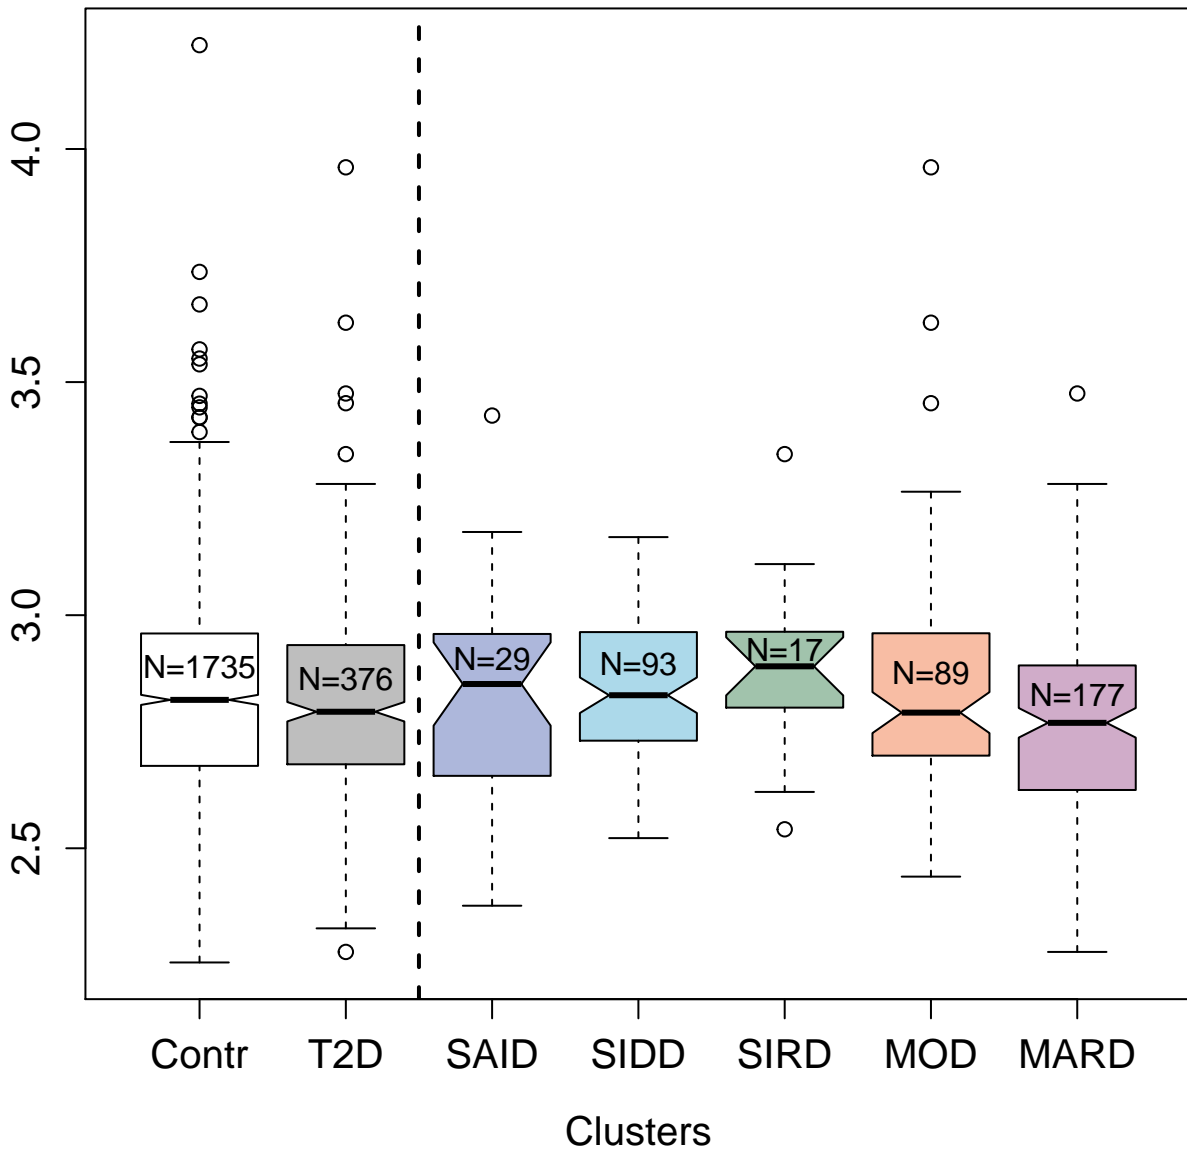

2961-1\_2 : Vitamin K-dependent protein C

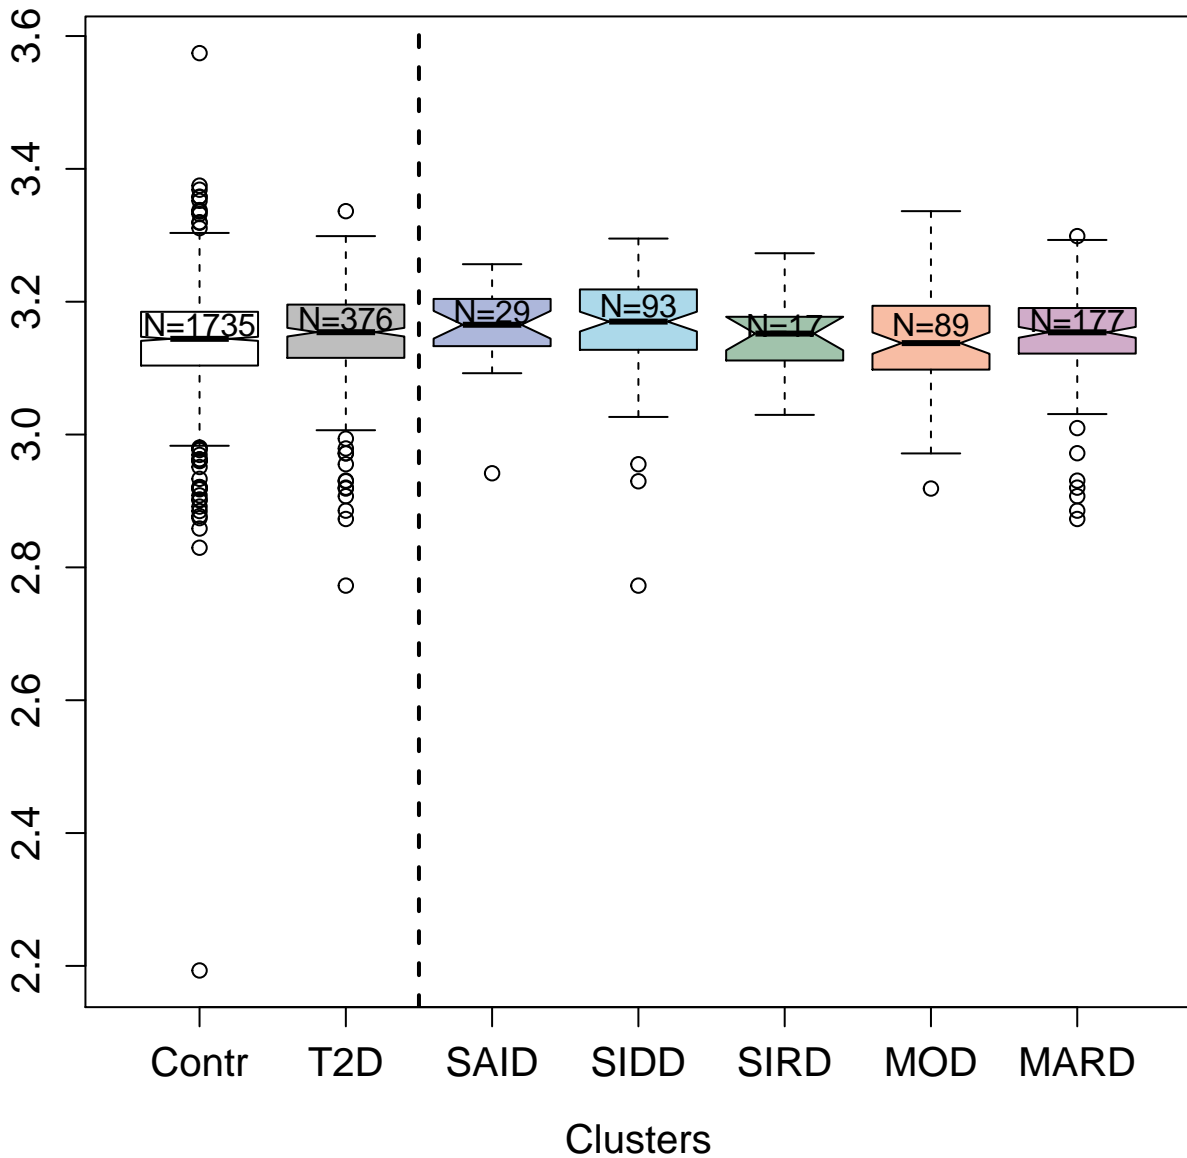

3646-7\_4 : Tyrosine-protein kinase Tec

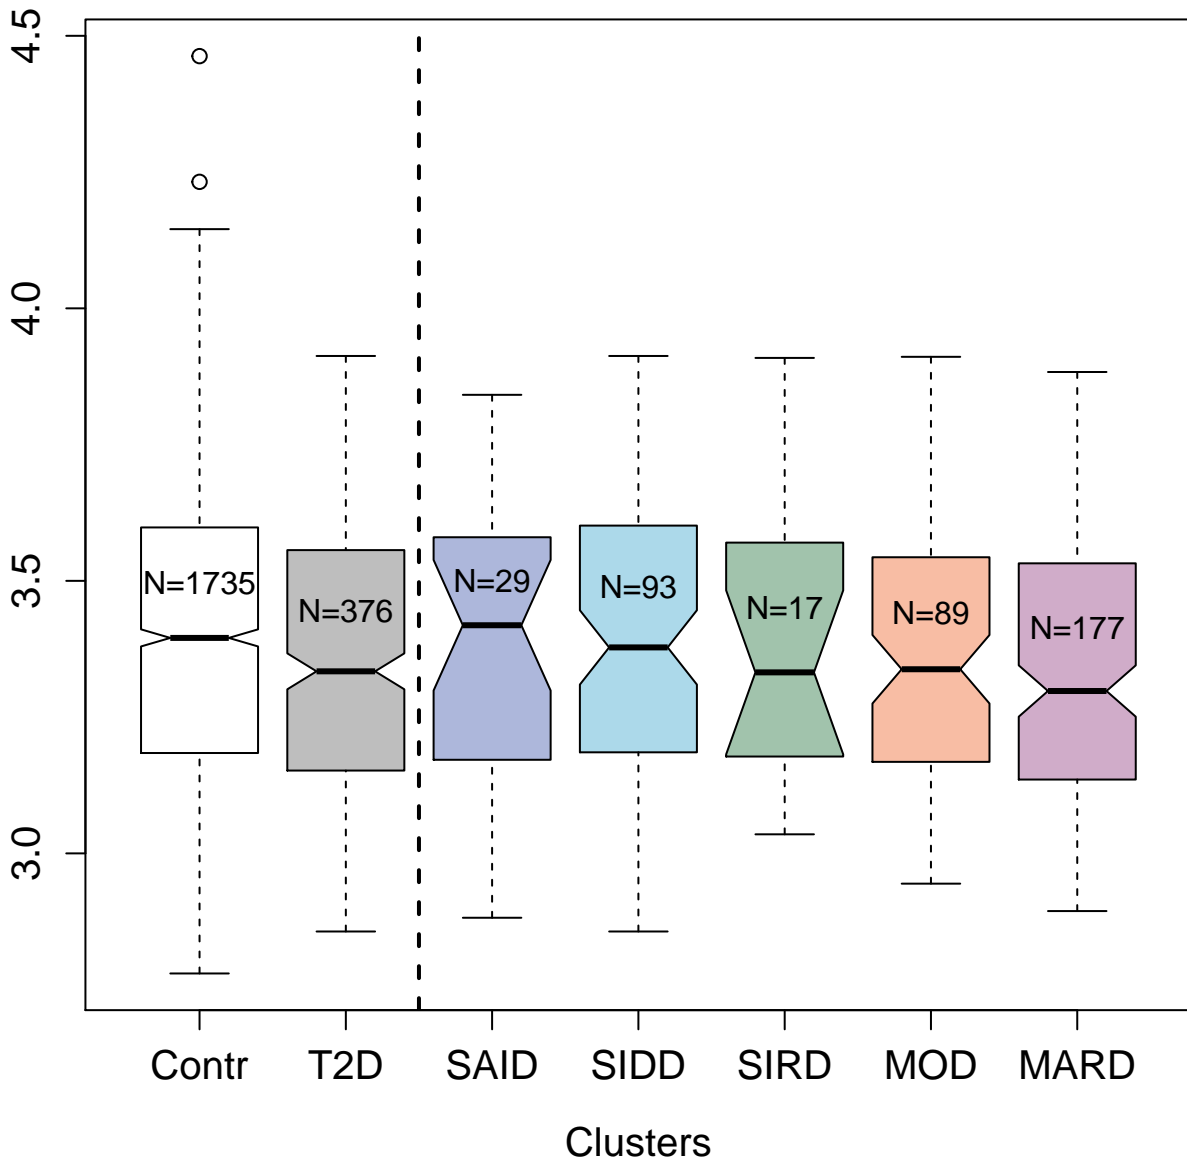

14146-92\_3 : Histone H3.1

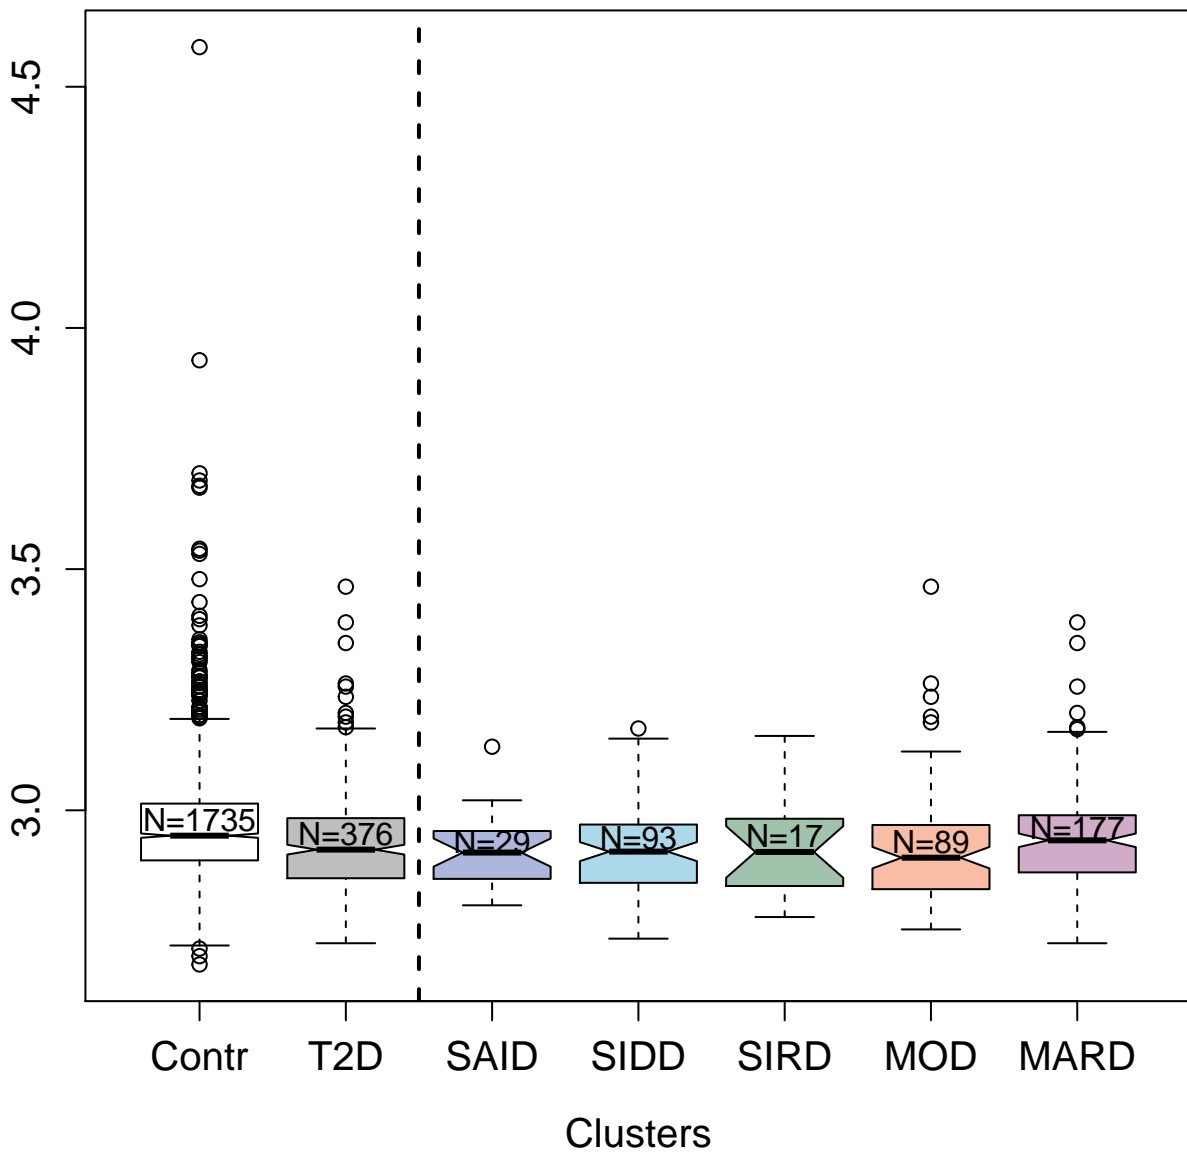



4566-24\_3 : R-spondin-2

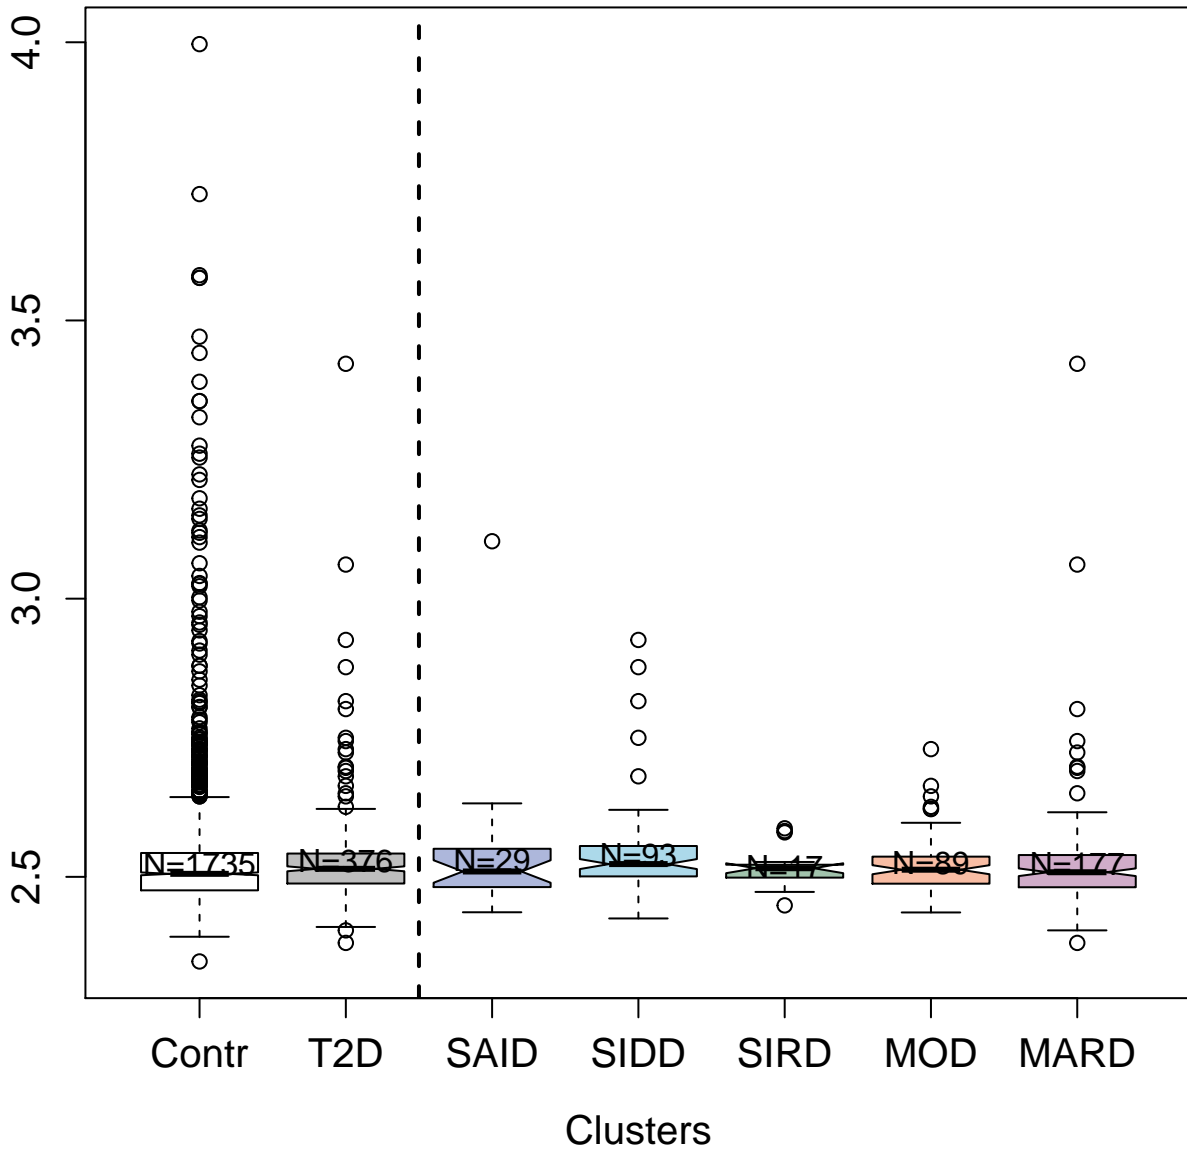

2805-6\_2 : Angiotensin-converting enzyme 2

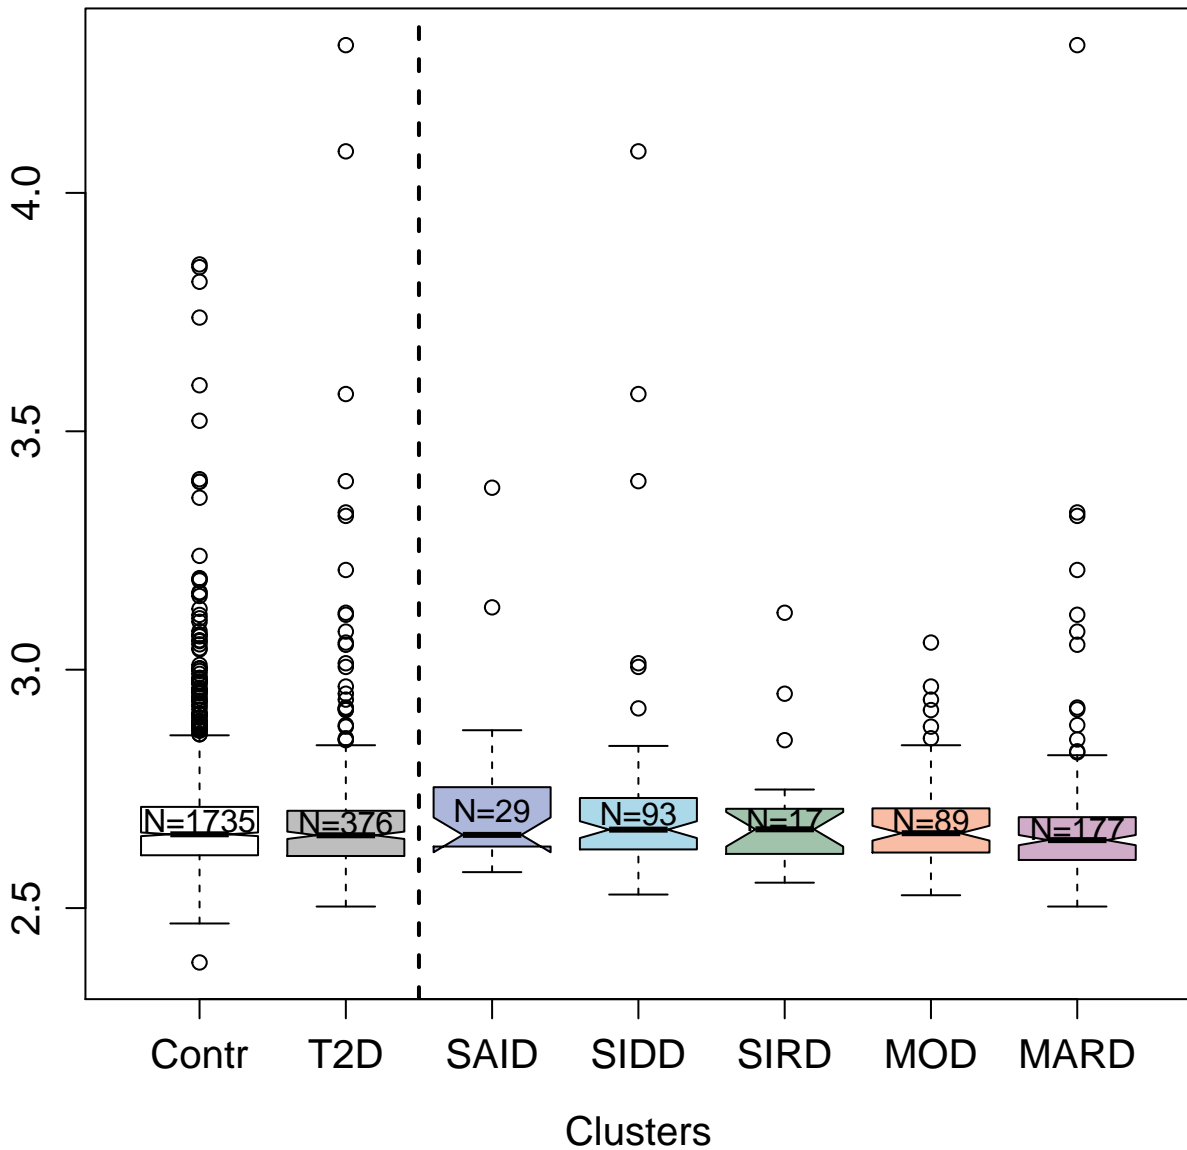

4267-81\_3 : Pescadillo homolog

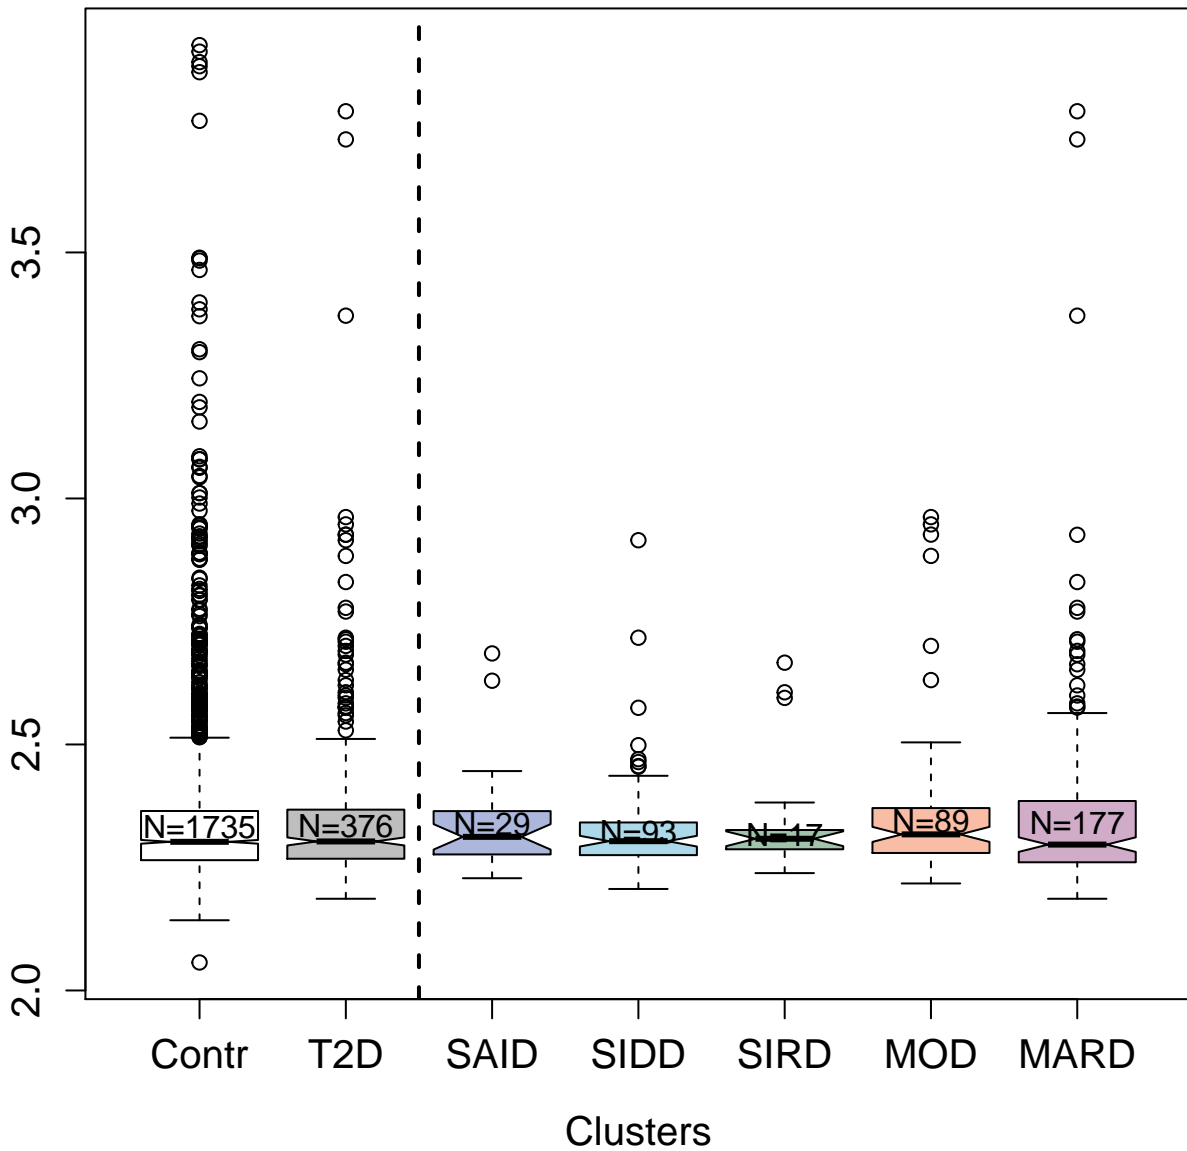

5238-26\_3 : Peptidyl-prolyl cis-trans isomerase E

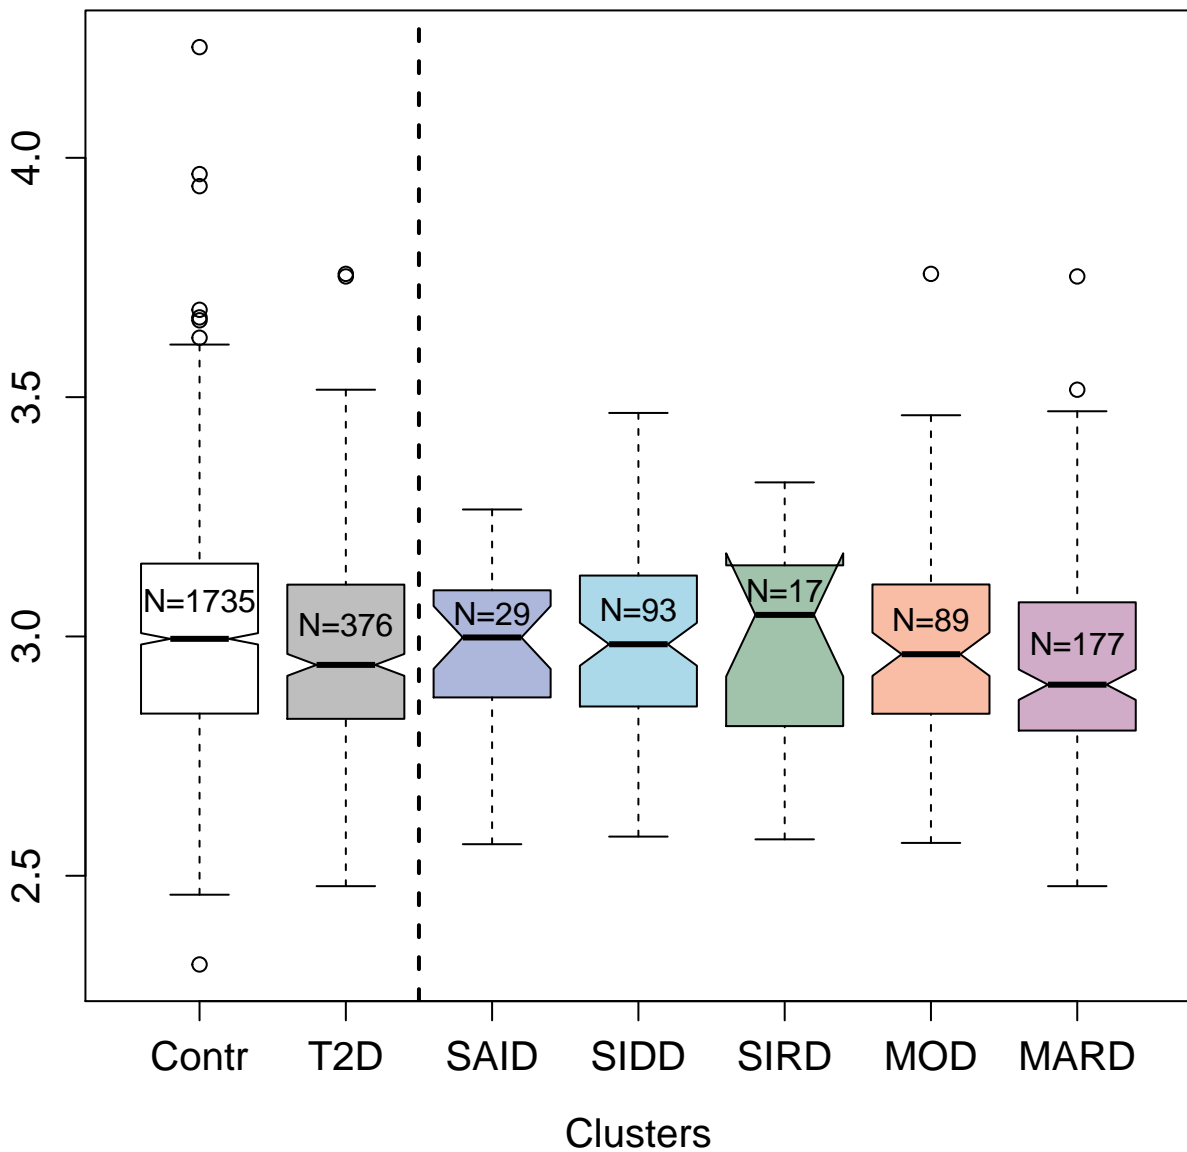

3798-71\_1 : Carbonic anhydrase 9

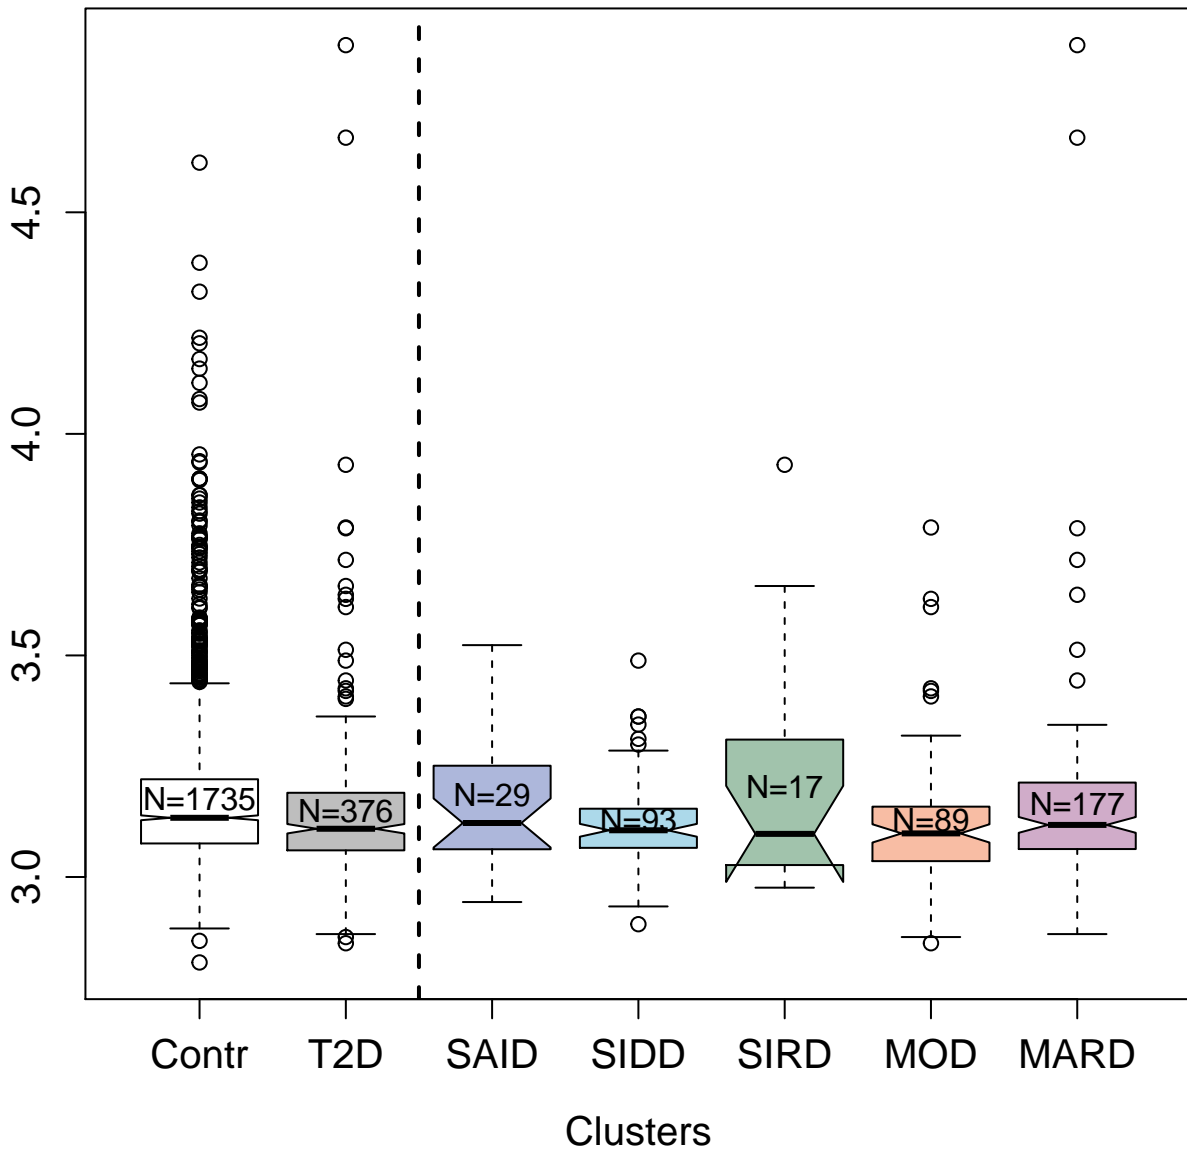

4128-27\_2 : C-C motif chemokine 24

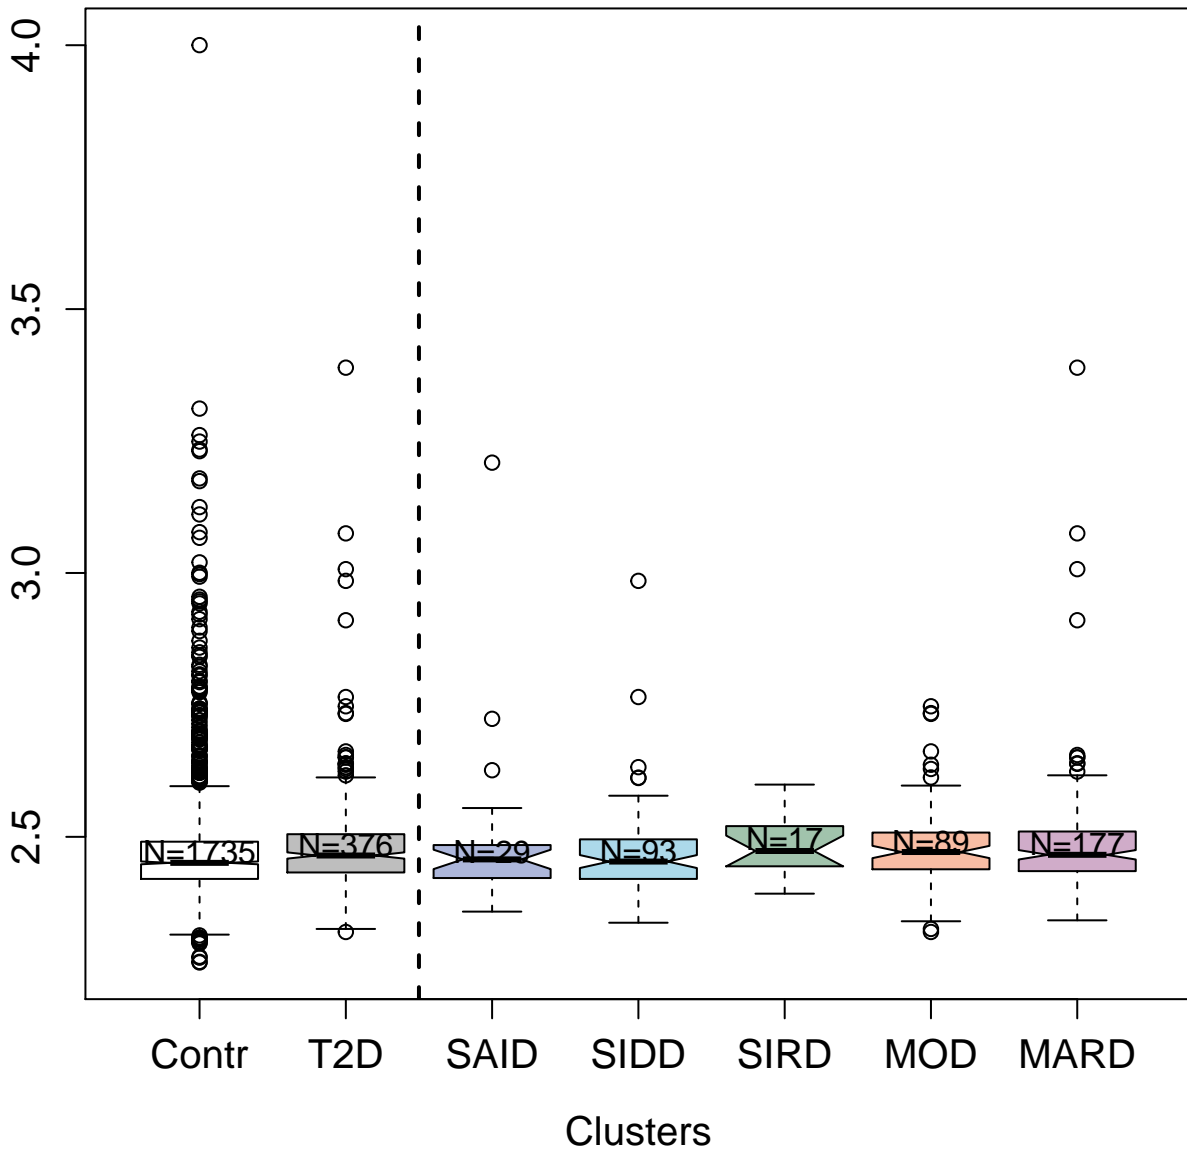

5927-4\_3 : WNT1-inducible--signaling pathway

protein 3

3.0 3.5 4.0 4.5 5.0

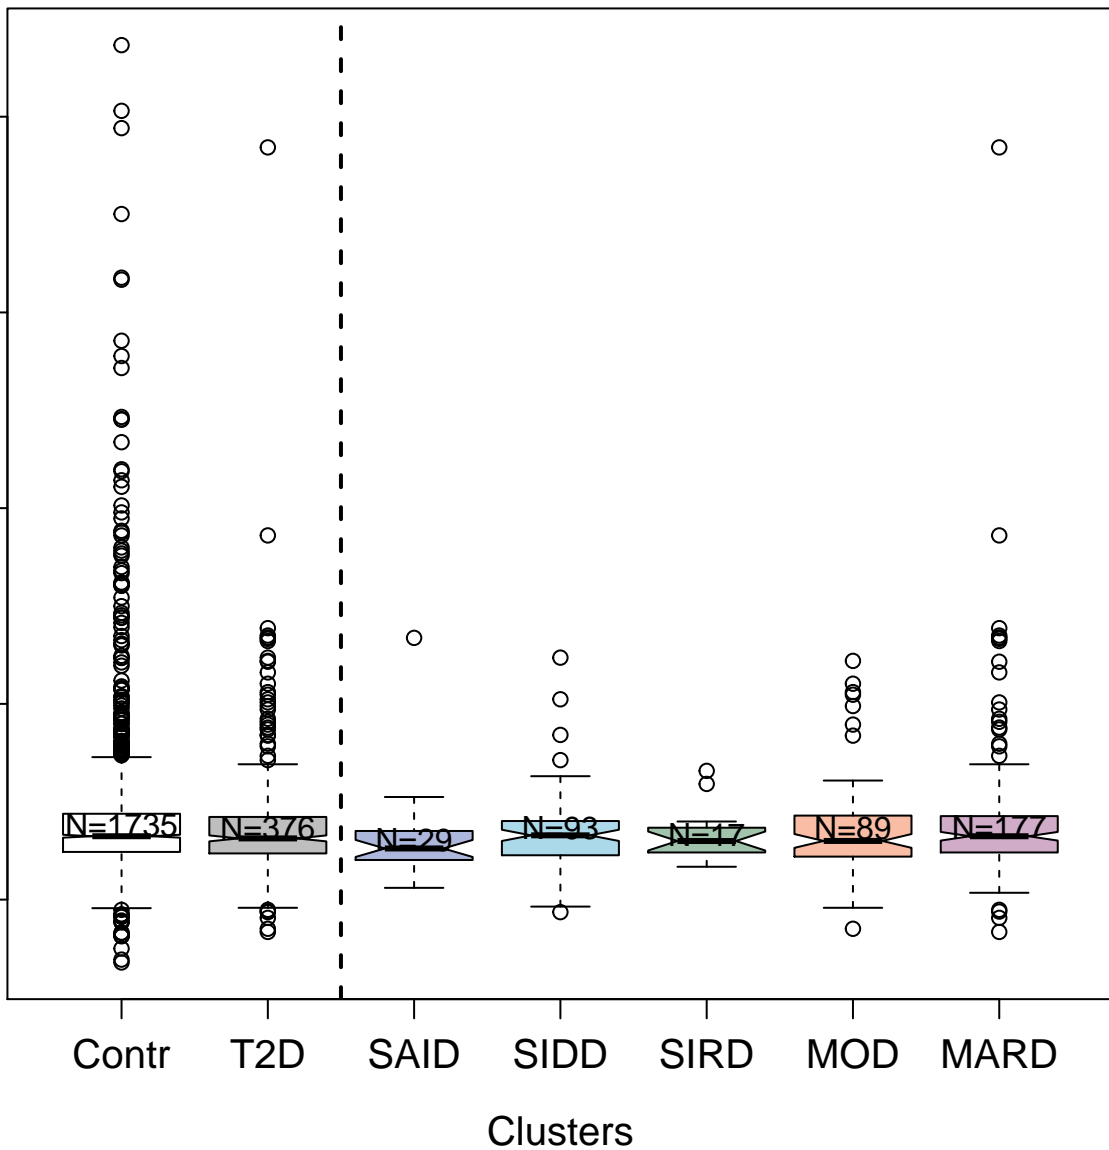

3813-3\_2 : Tyrosine-protein kinase Fyn

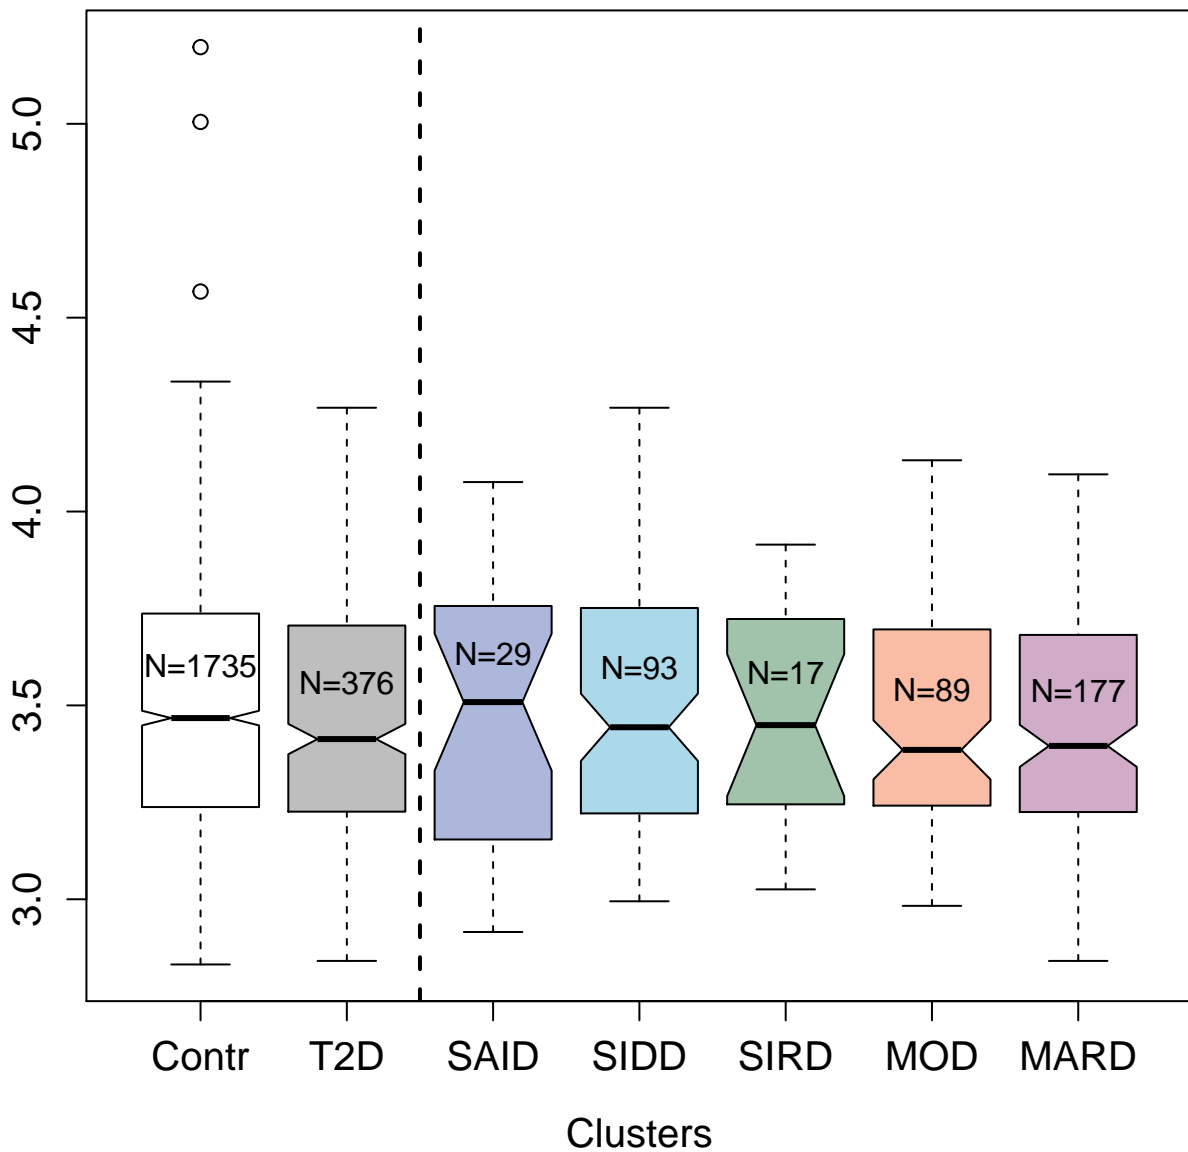



4165-2\_1 : Thyroglobulin

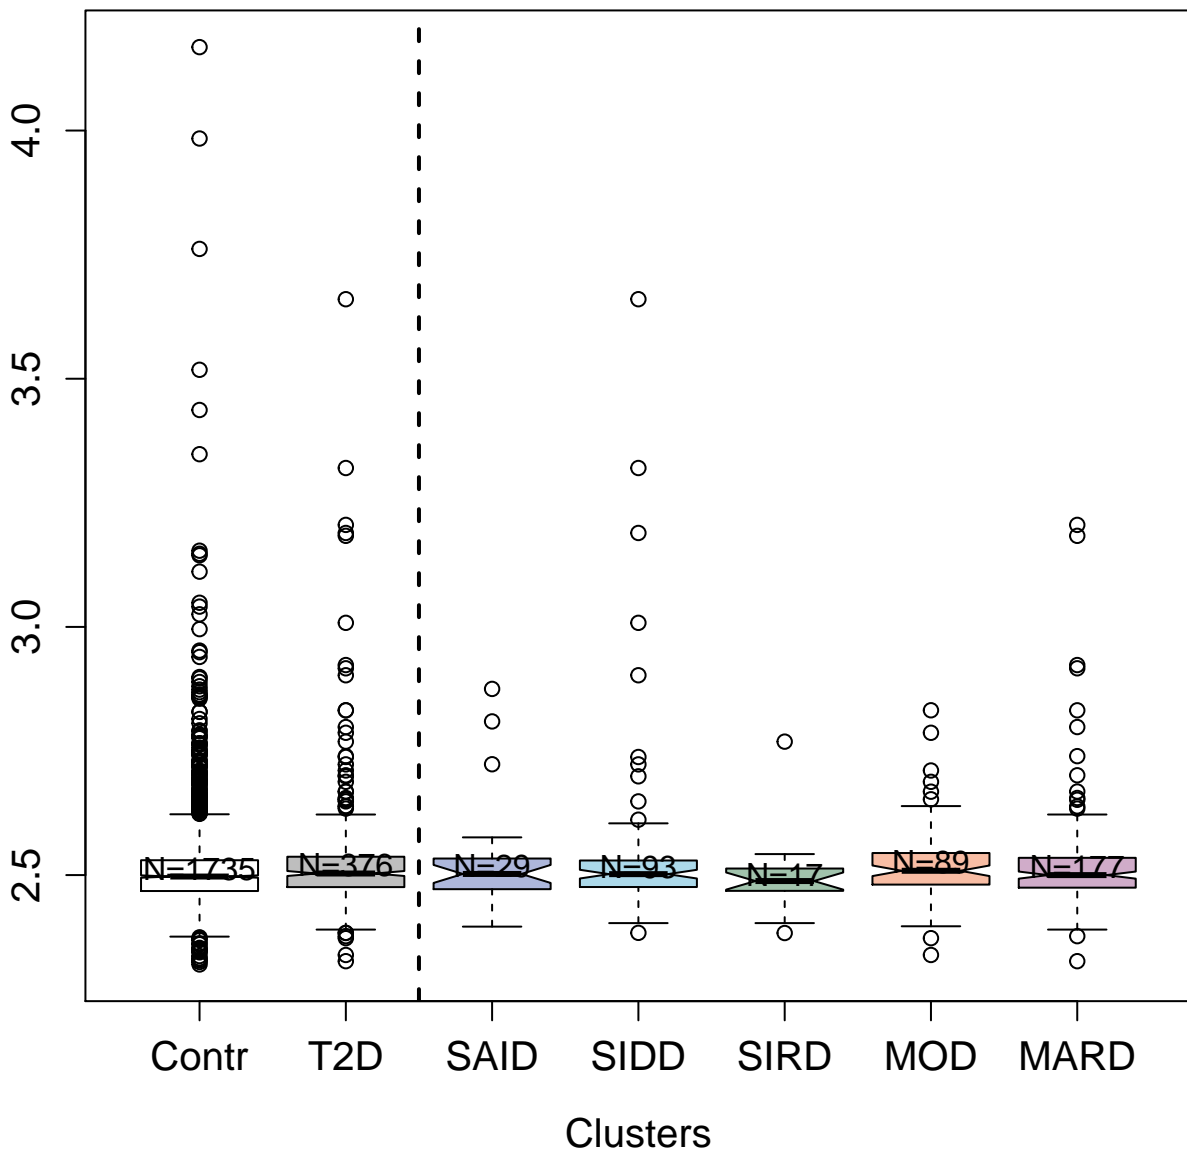

4991-12\_1 : Glypican-5

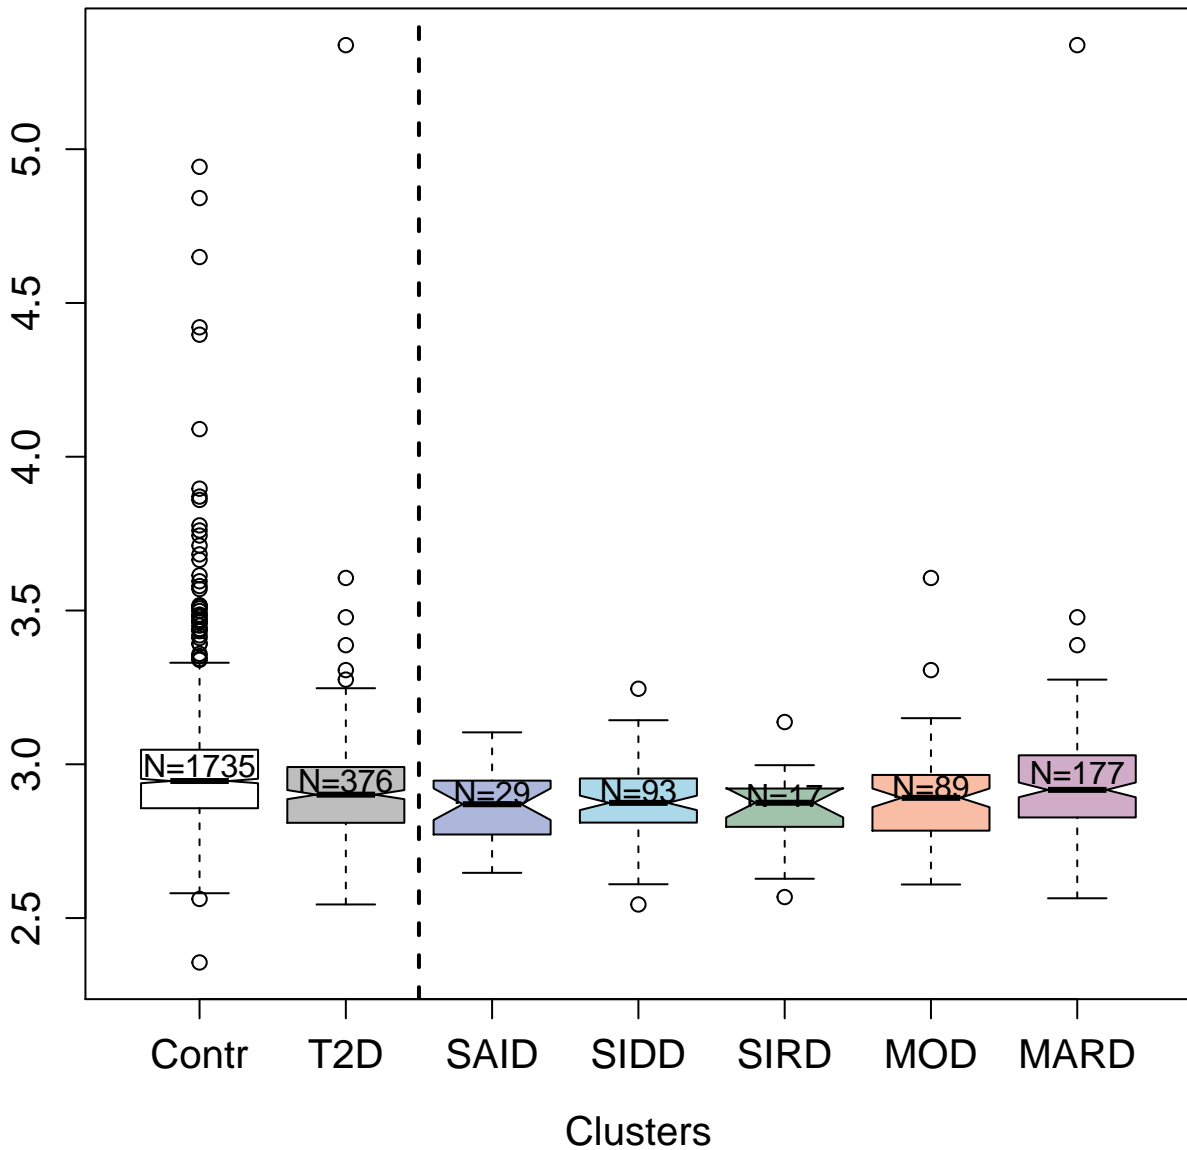

3041-55\_2 : C-type mannose receptor 2

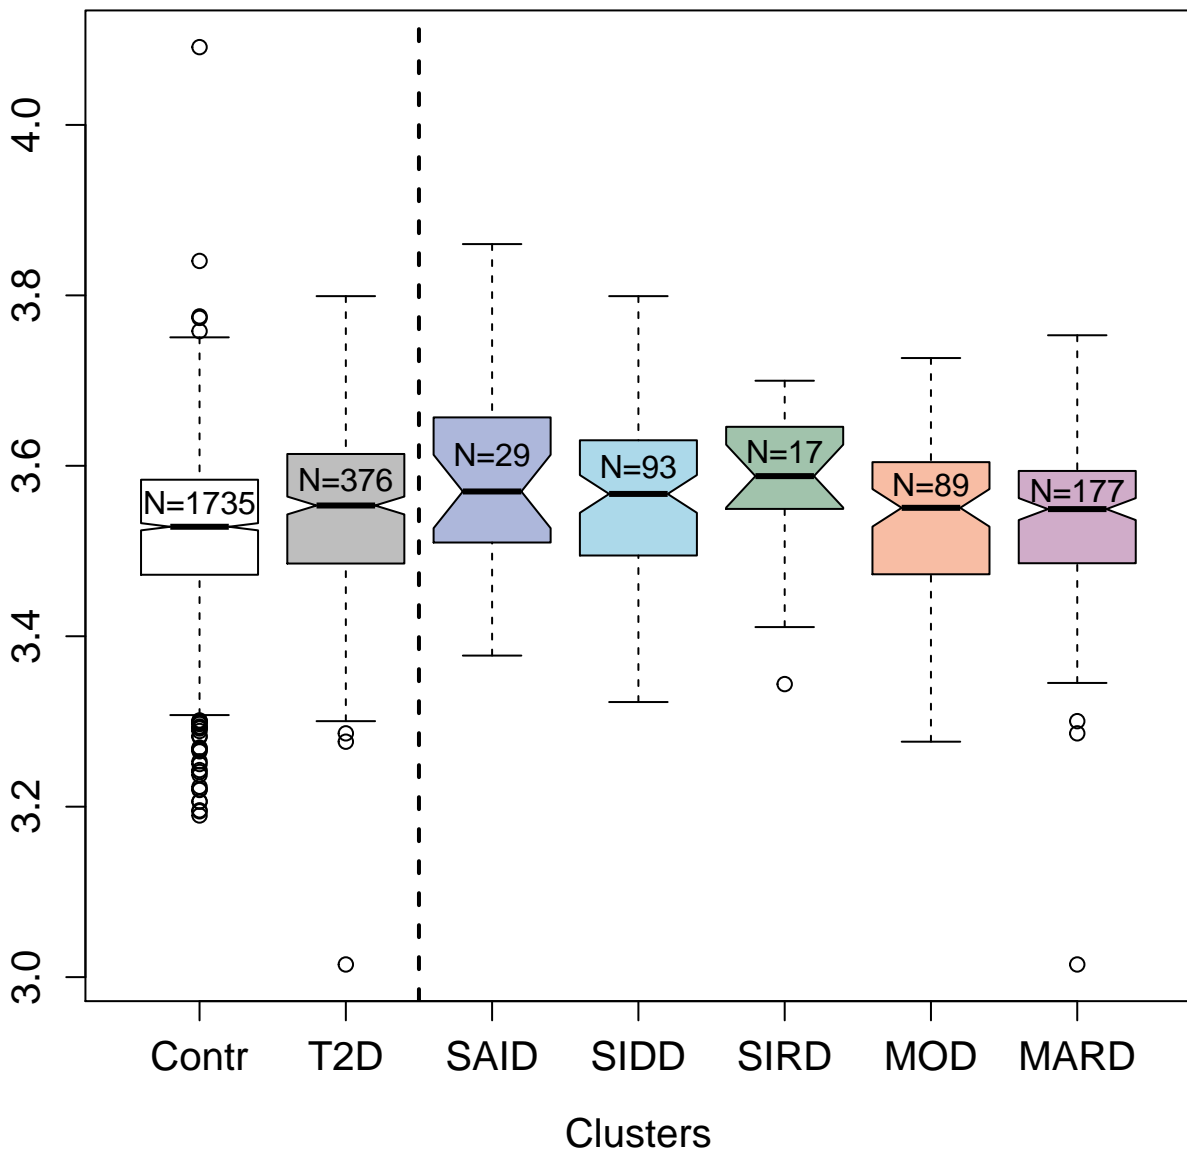

12060-28\_3 : Growth/differentiation factor 11

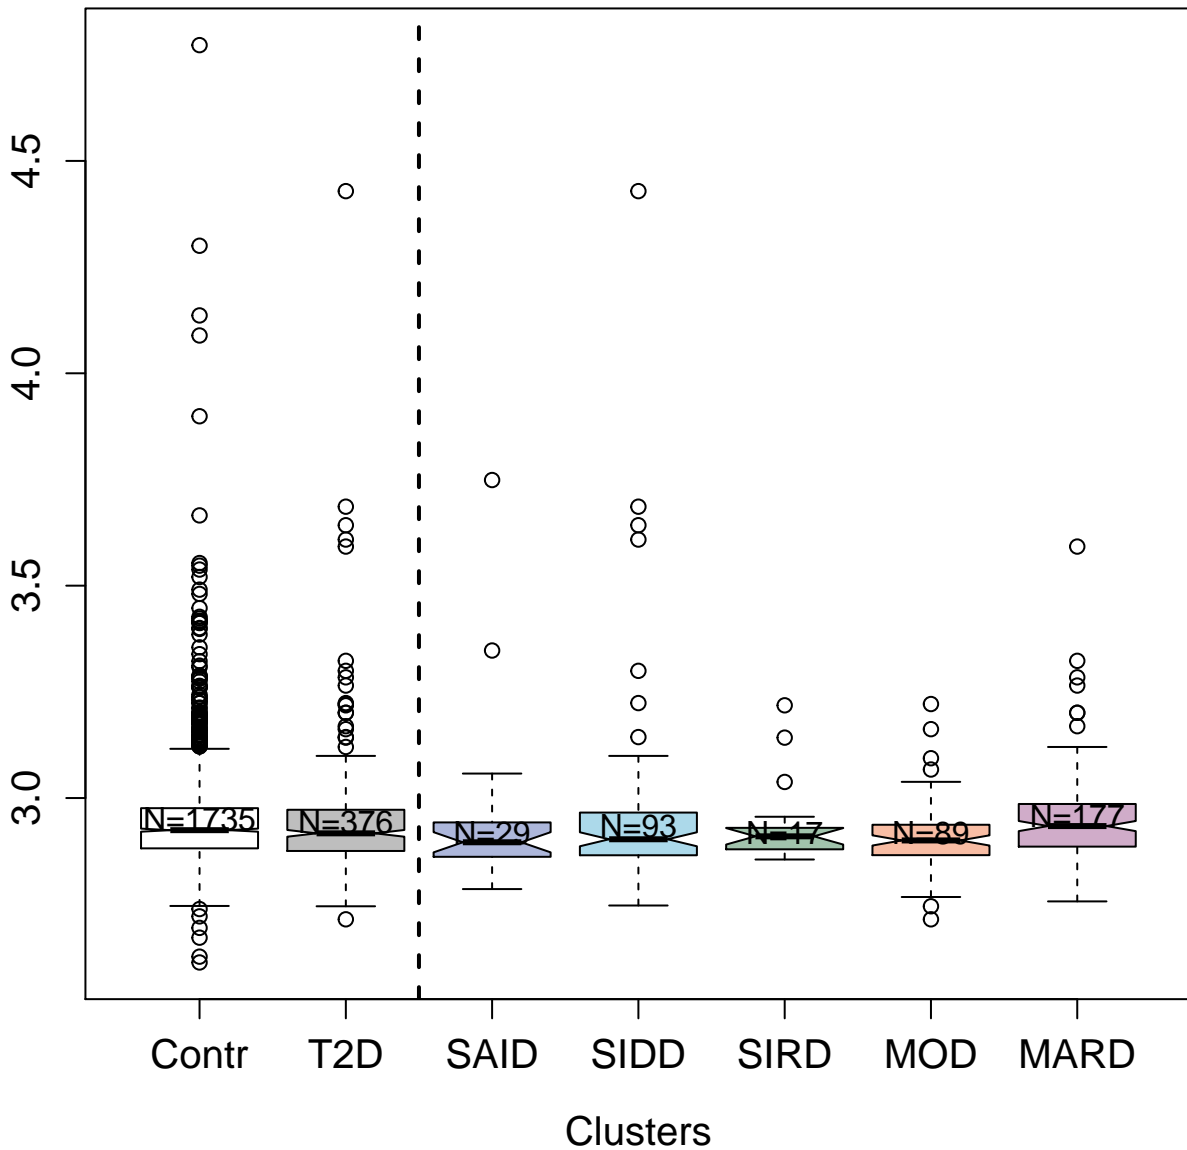

3538-26\_1 : Aromatic-L-amino-acid decarboxylase

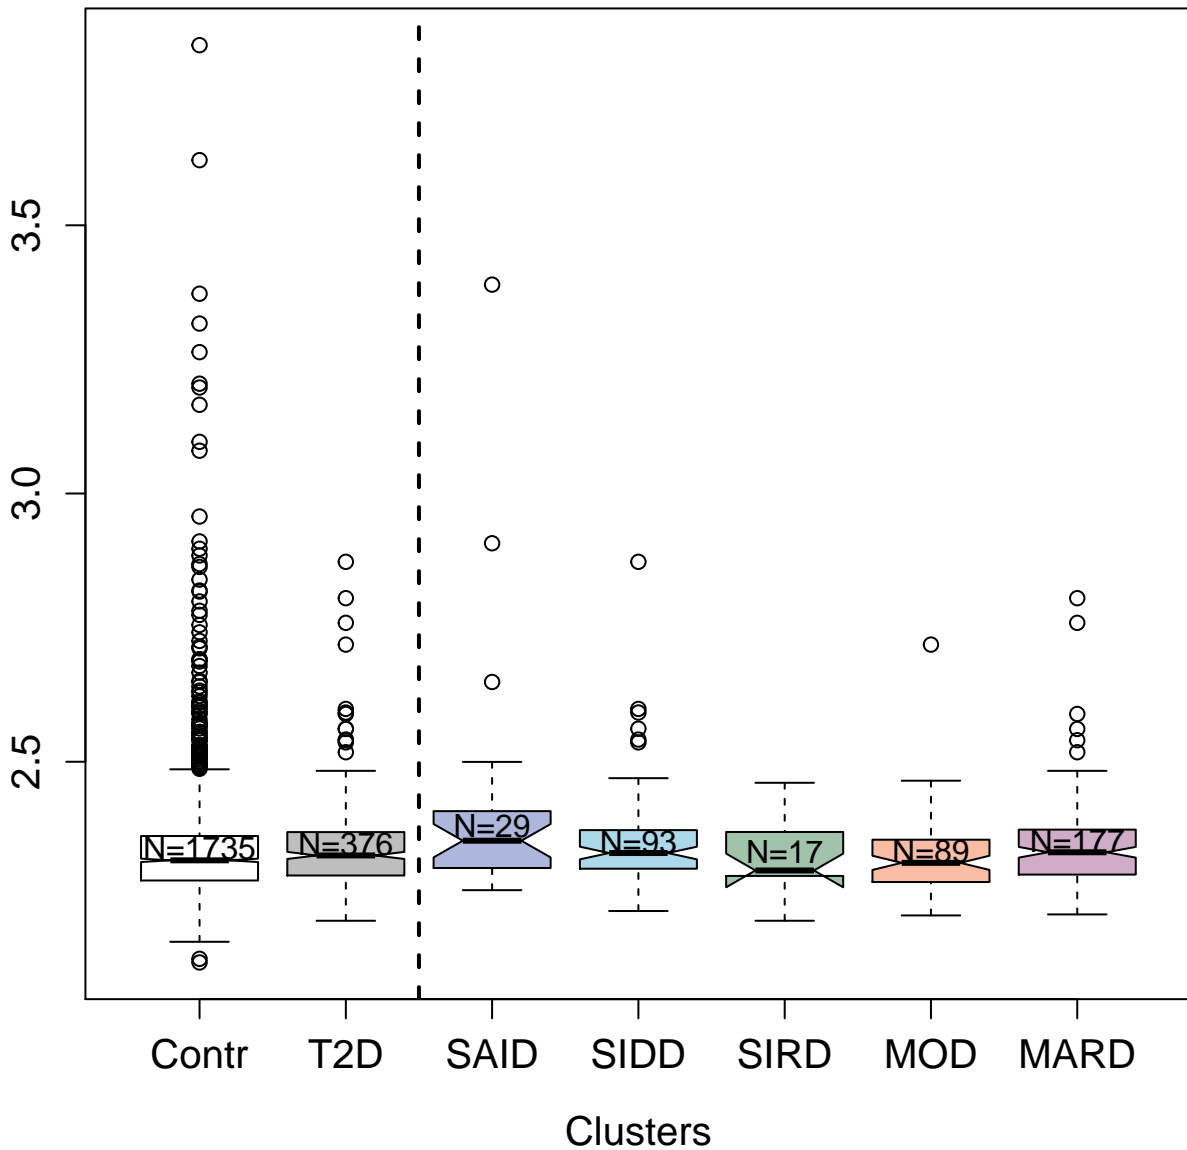

7655-11\_3 : N-terminal pro-BNP

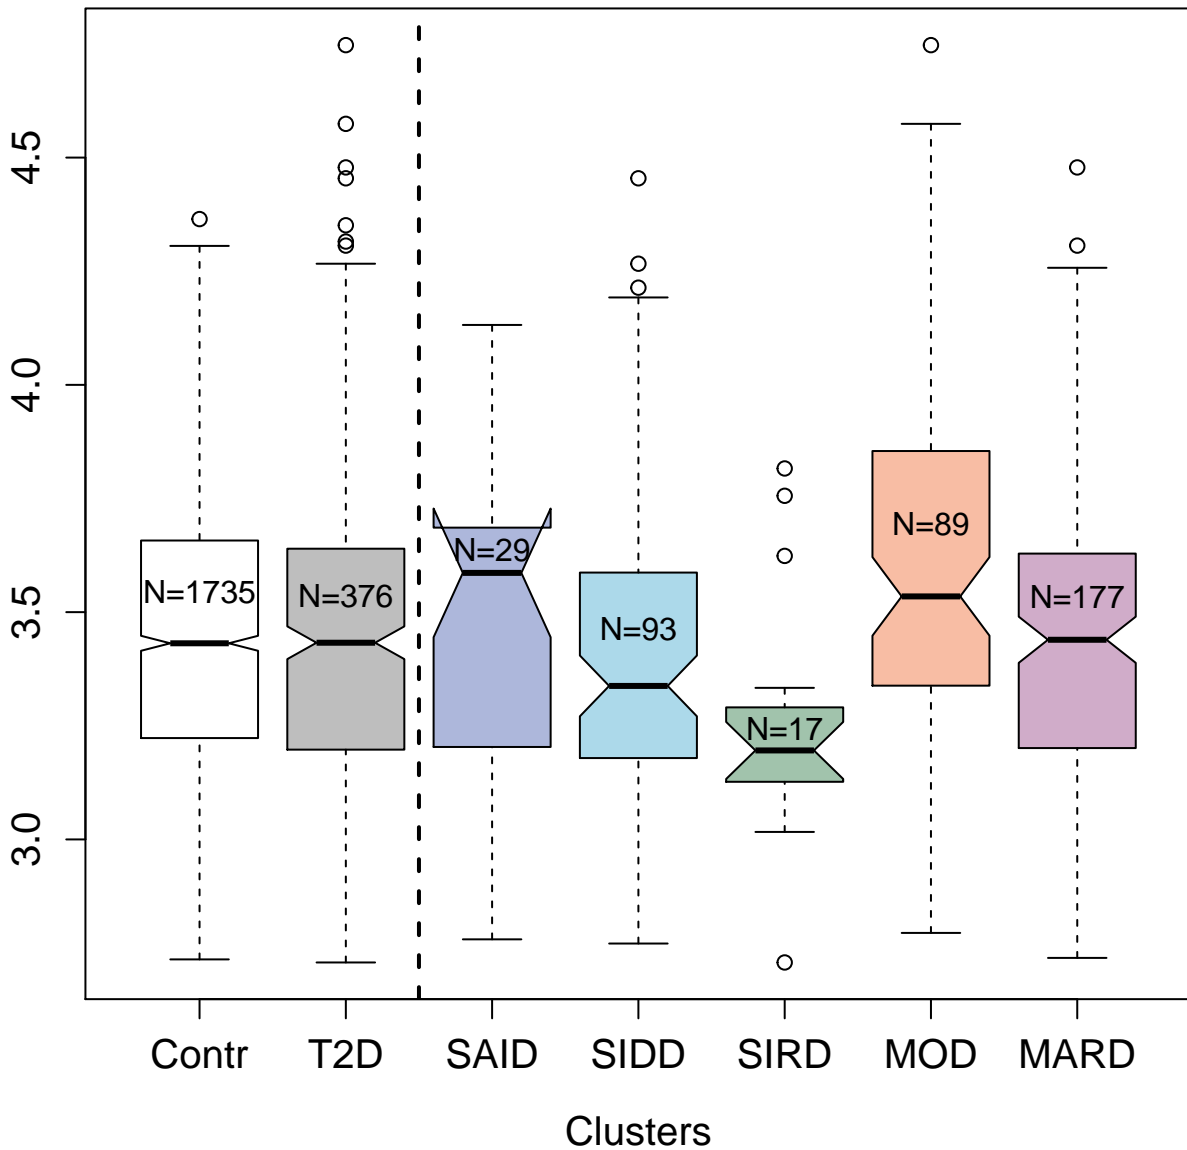

5813-58\_3 : Erythropoietin

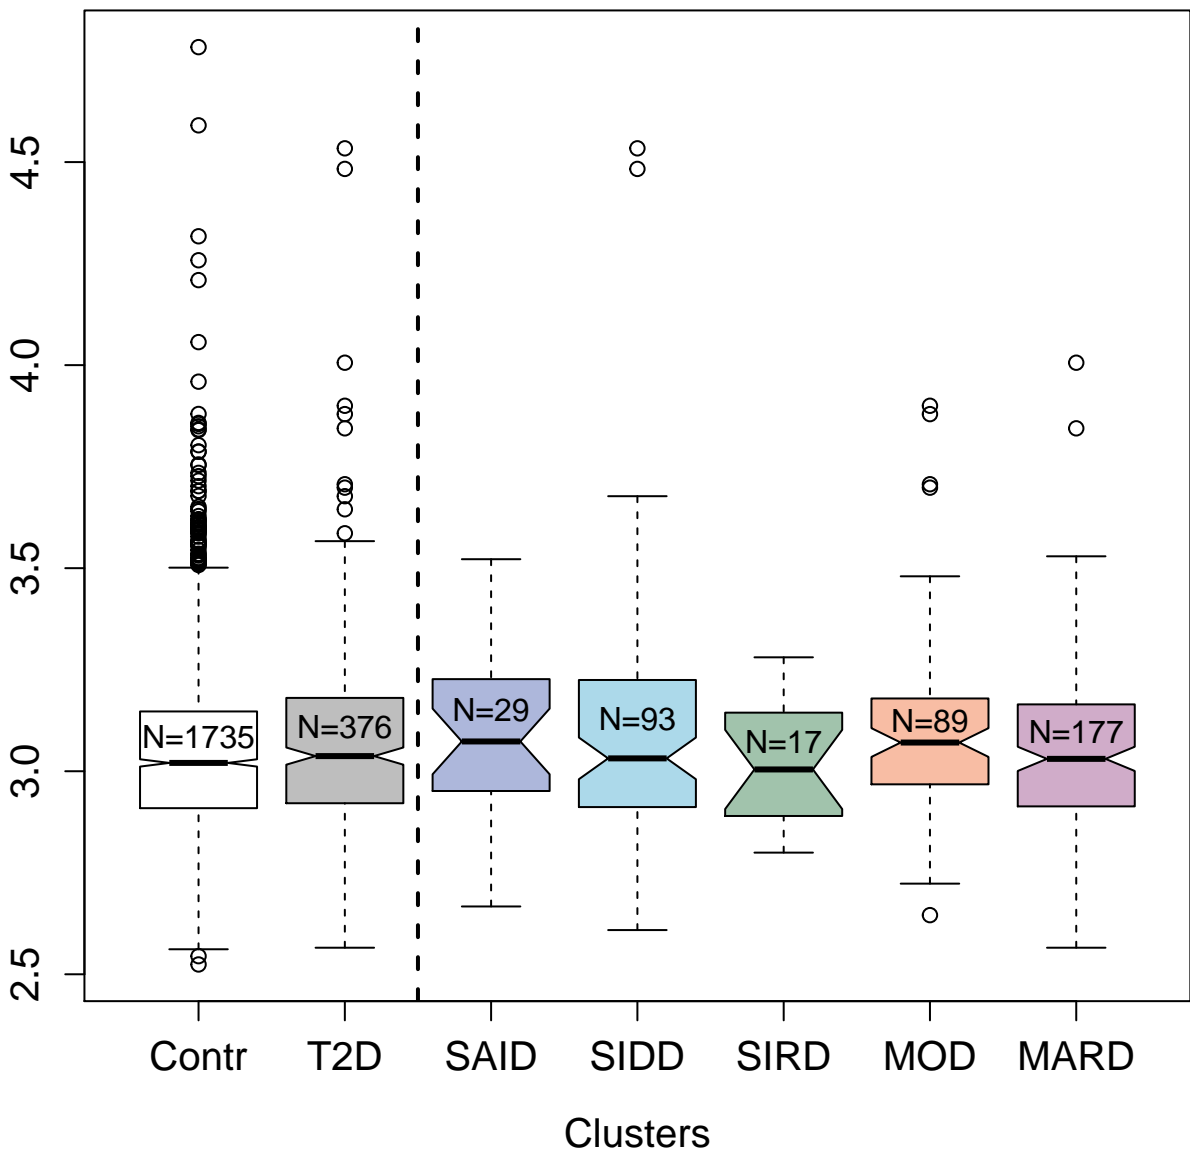

2864-2\_3 : Dual specificity mitogen-activated protein kinase kinase 1

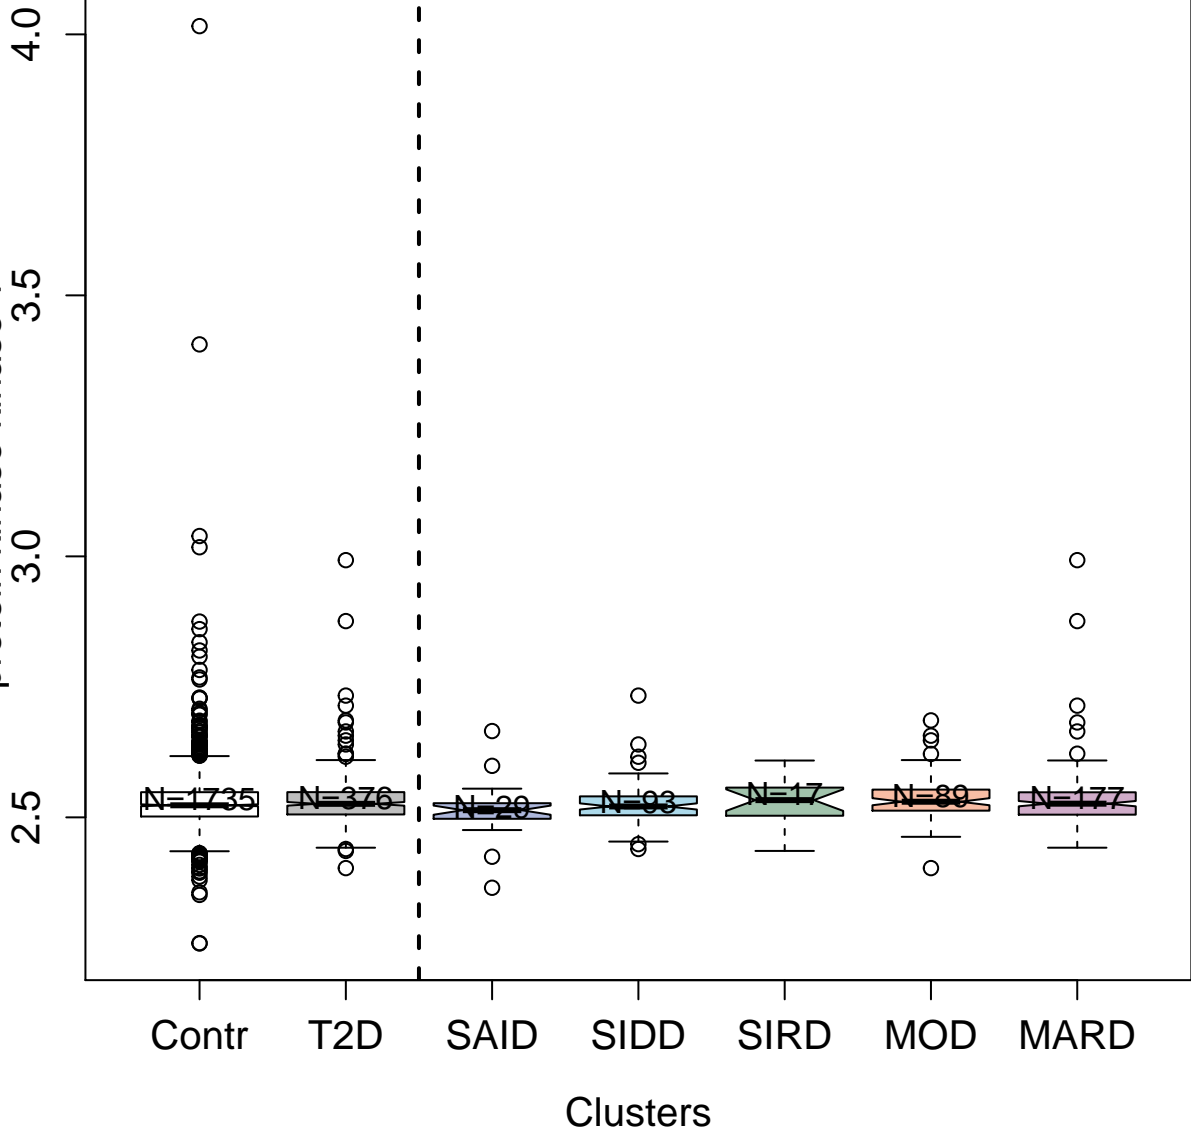



4549-78\_2 : Alpha-(1;3)-fucosyltransferase 5

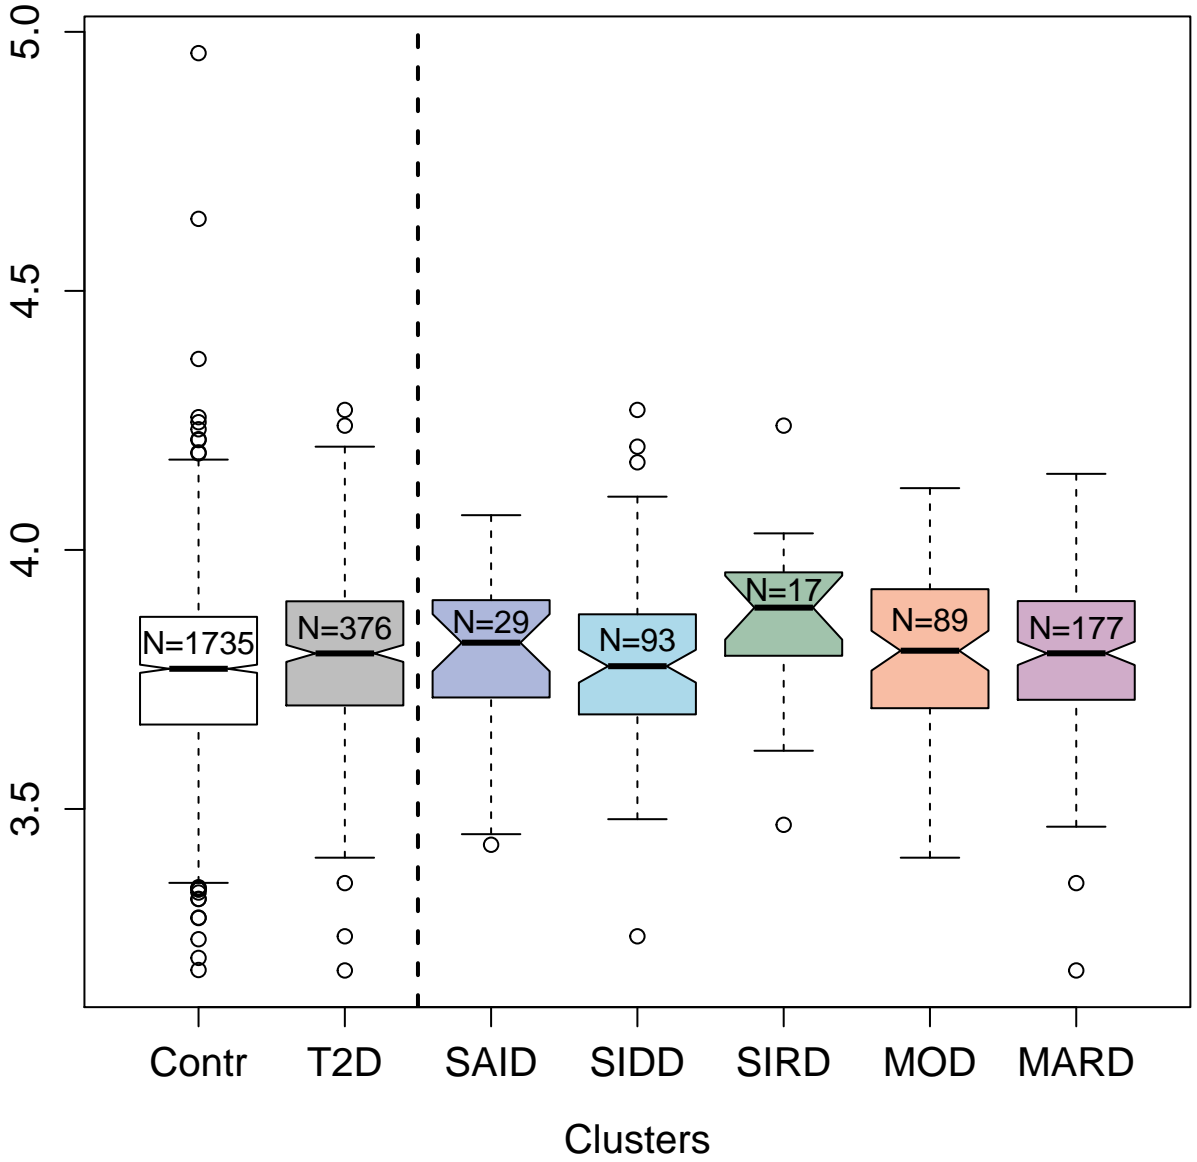

2731-29\_2 : NADPH--cytochrome P450 reductase

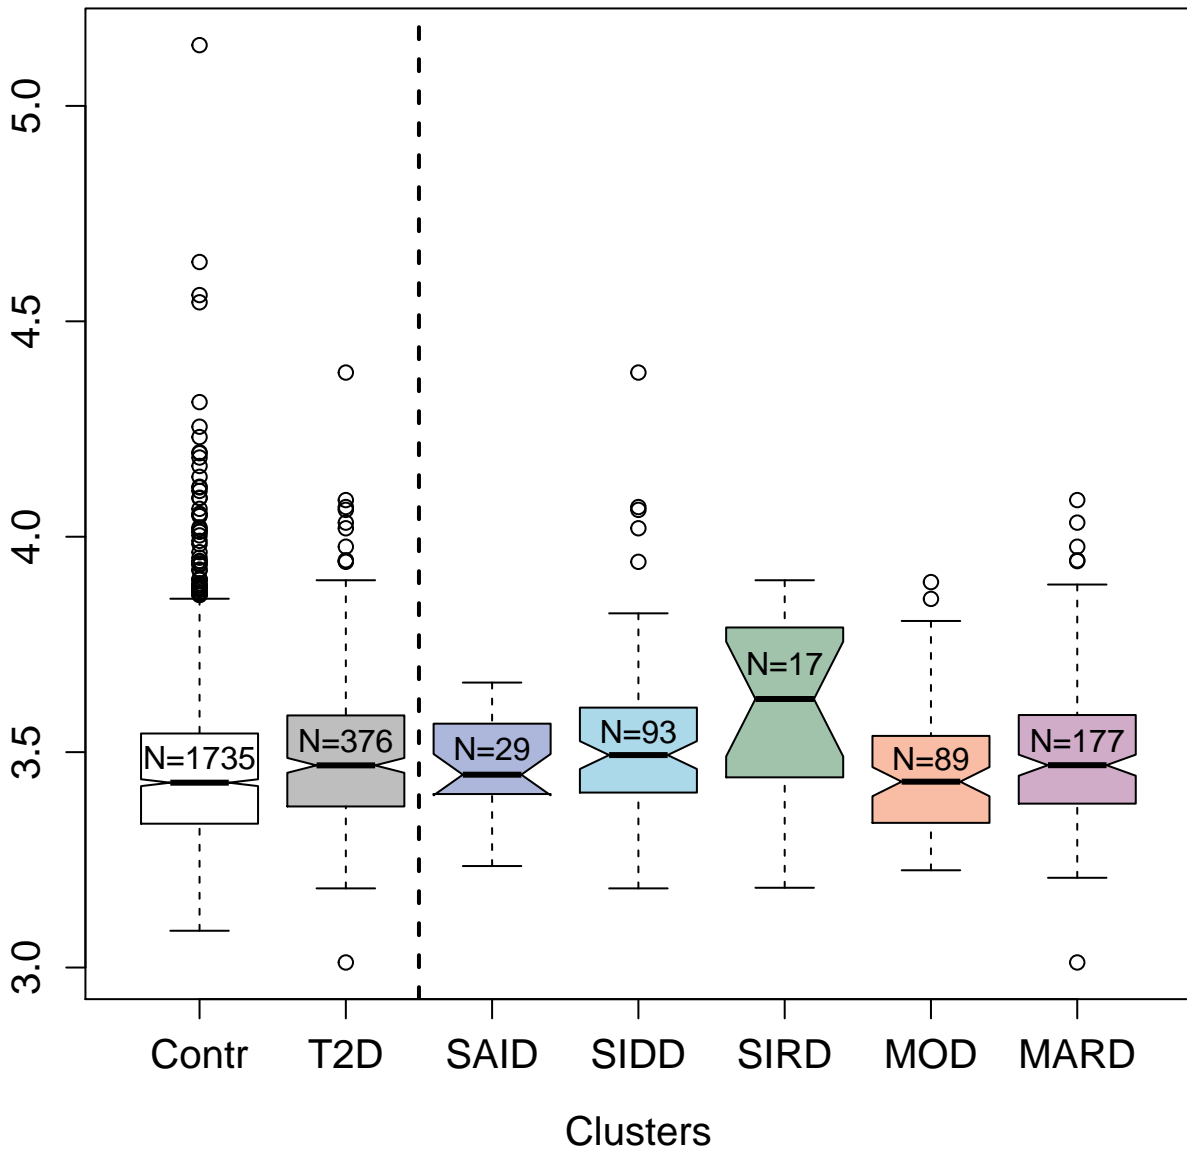

14116-129\_3 : Protein S100-A4

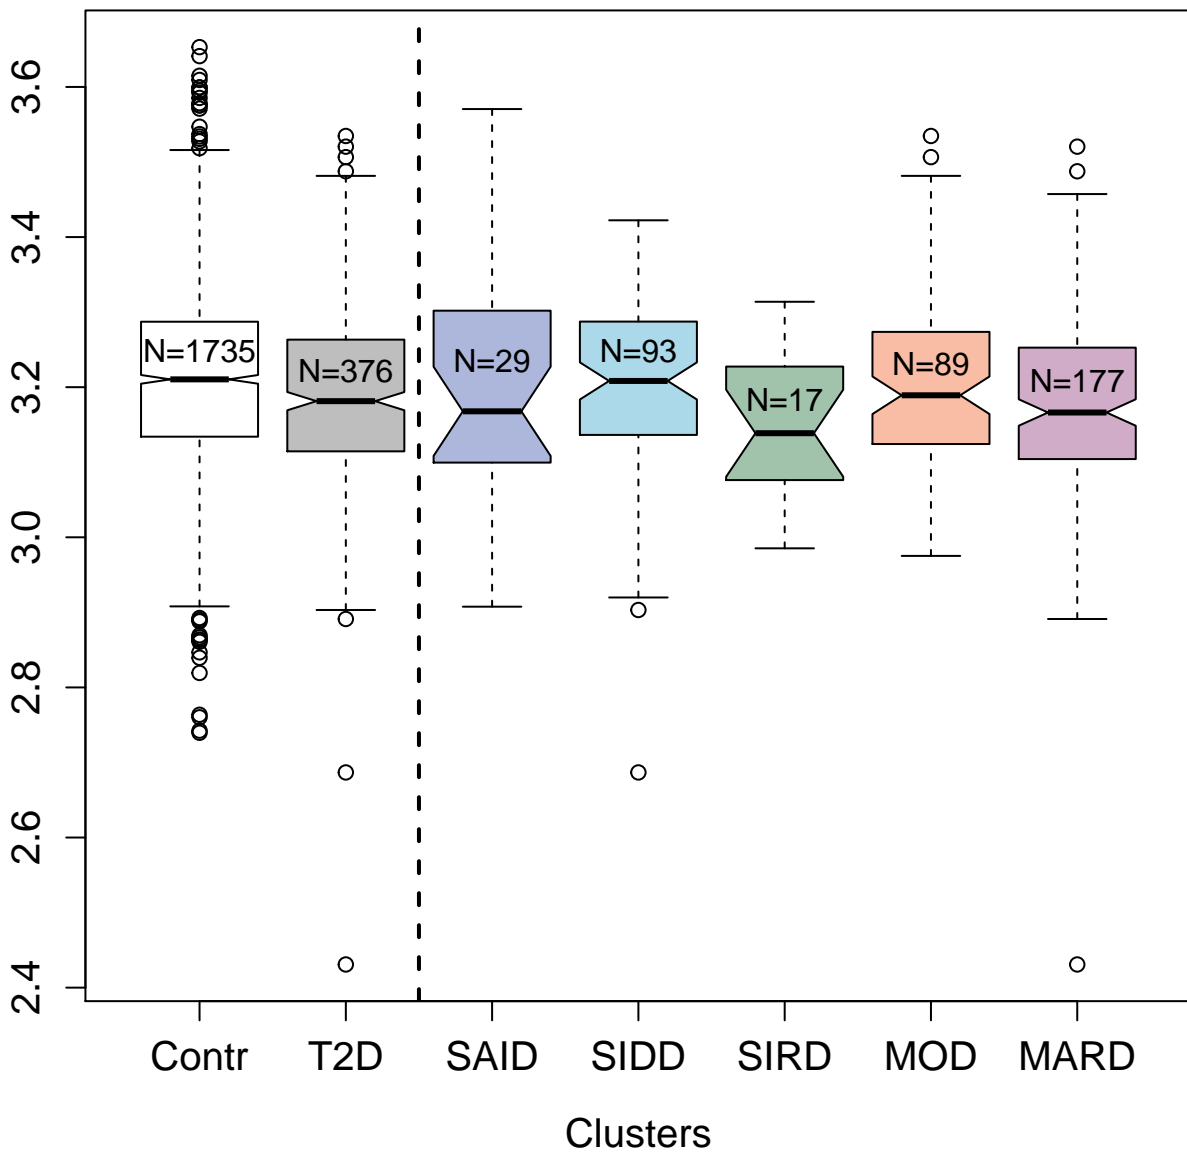

4276-10\_2 : Phosphatidylethanolamine-binding

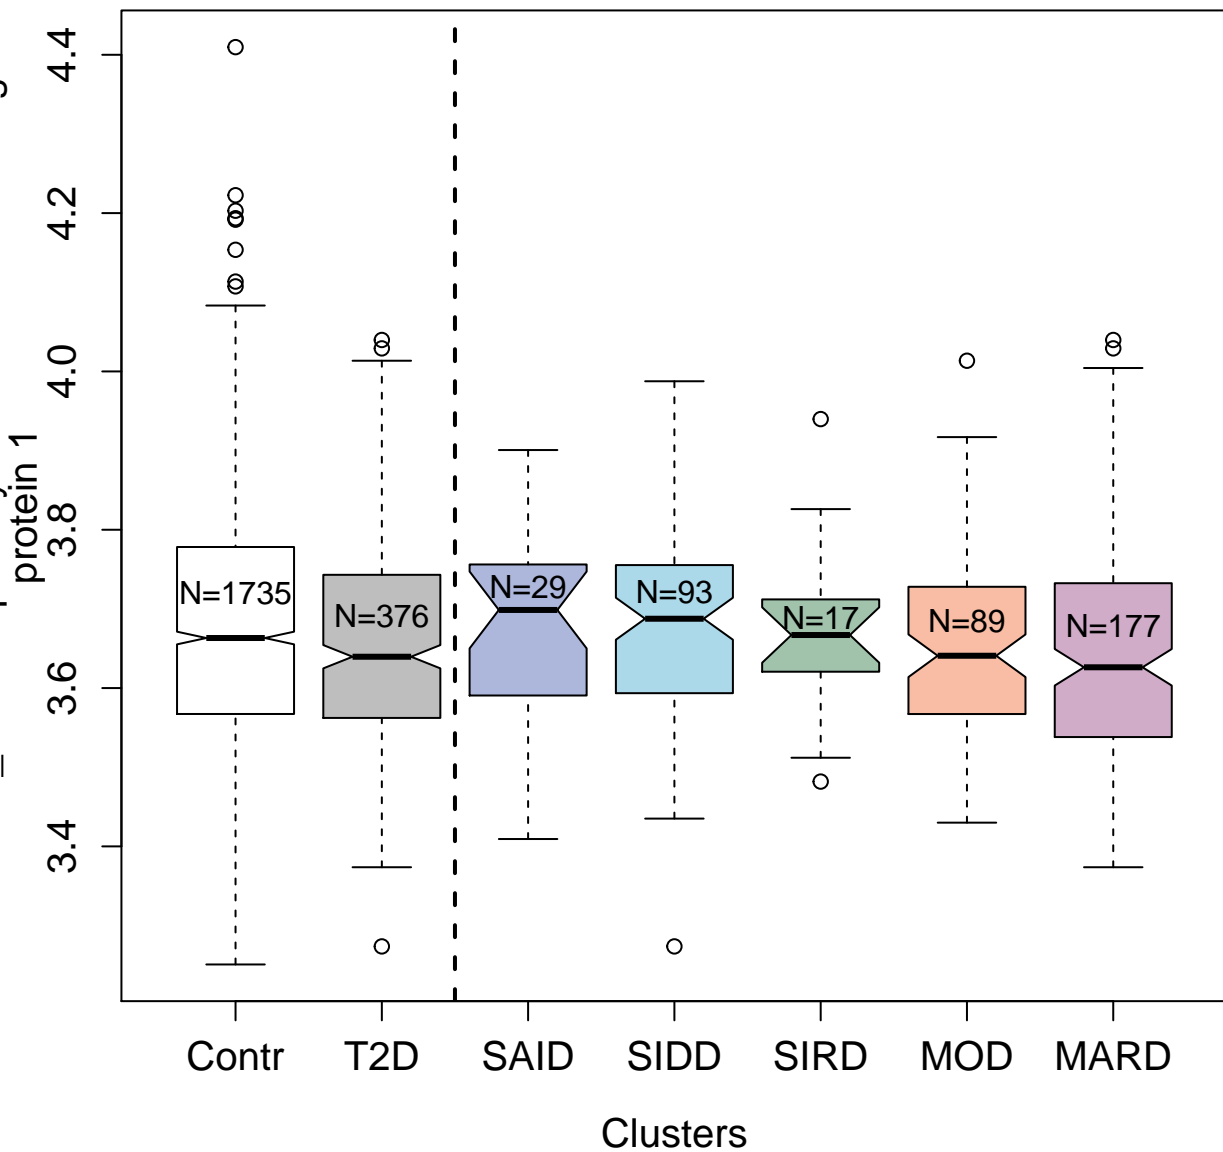

2953-31\_2 : Luteinizing hormone

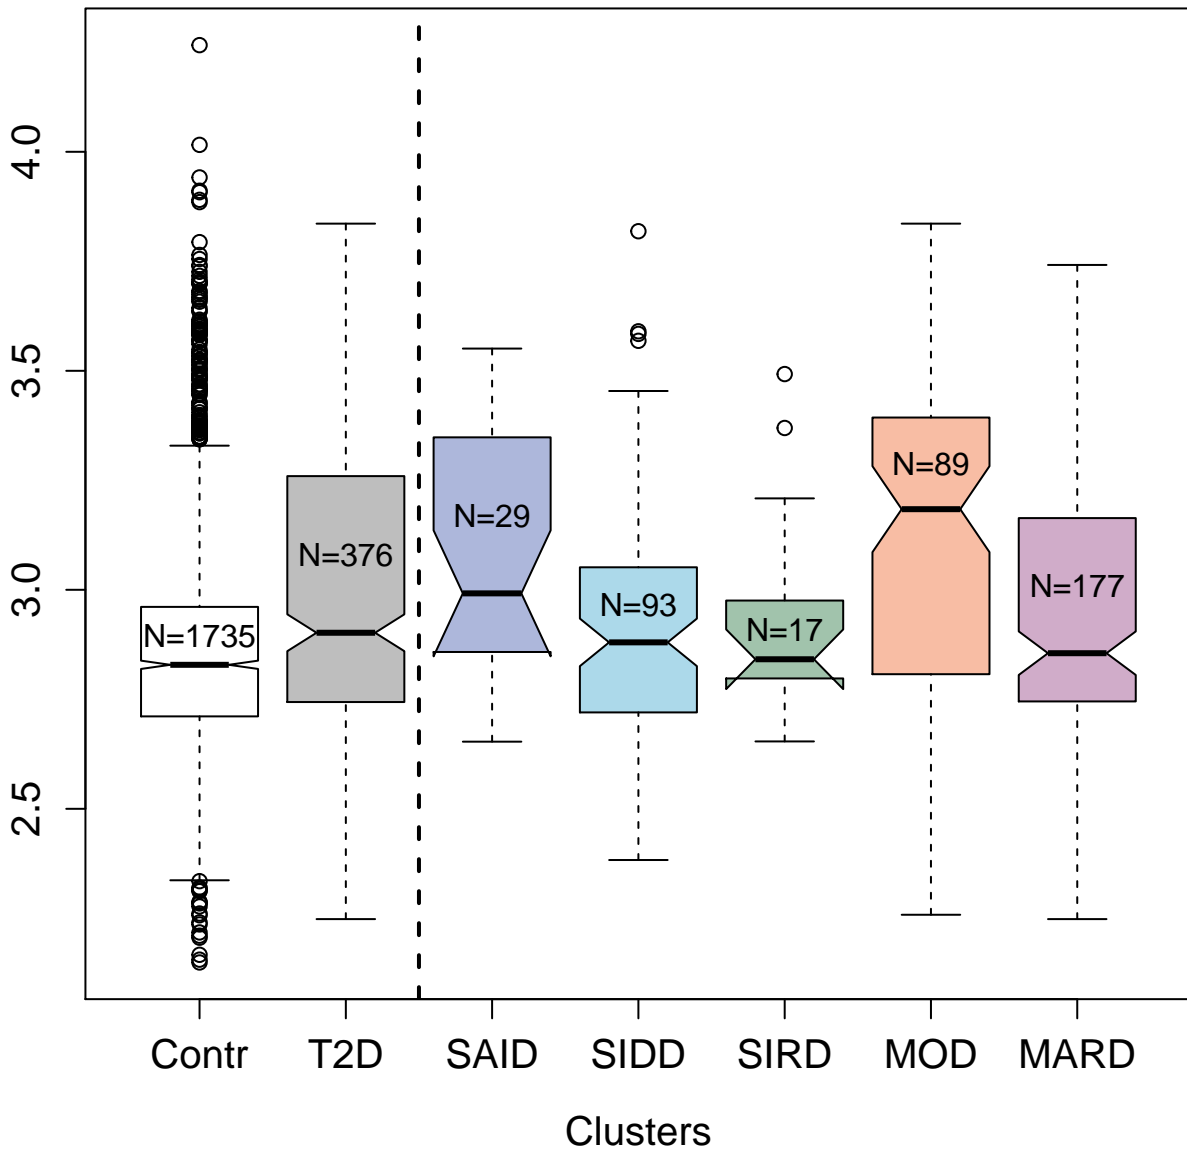

5020-50\_1 : Phosphoglycerate kinase 1

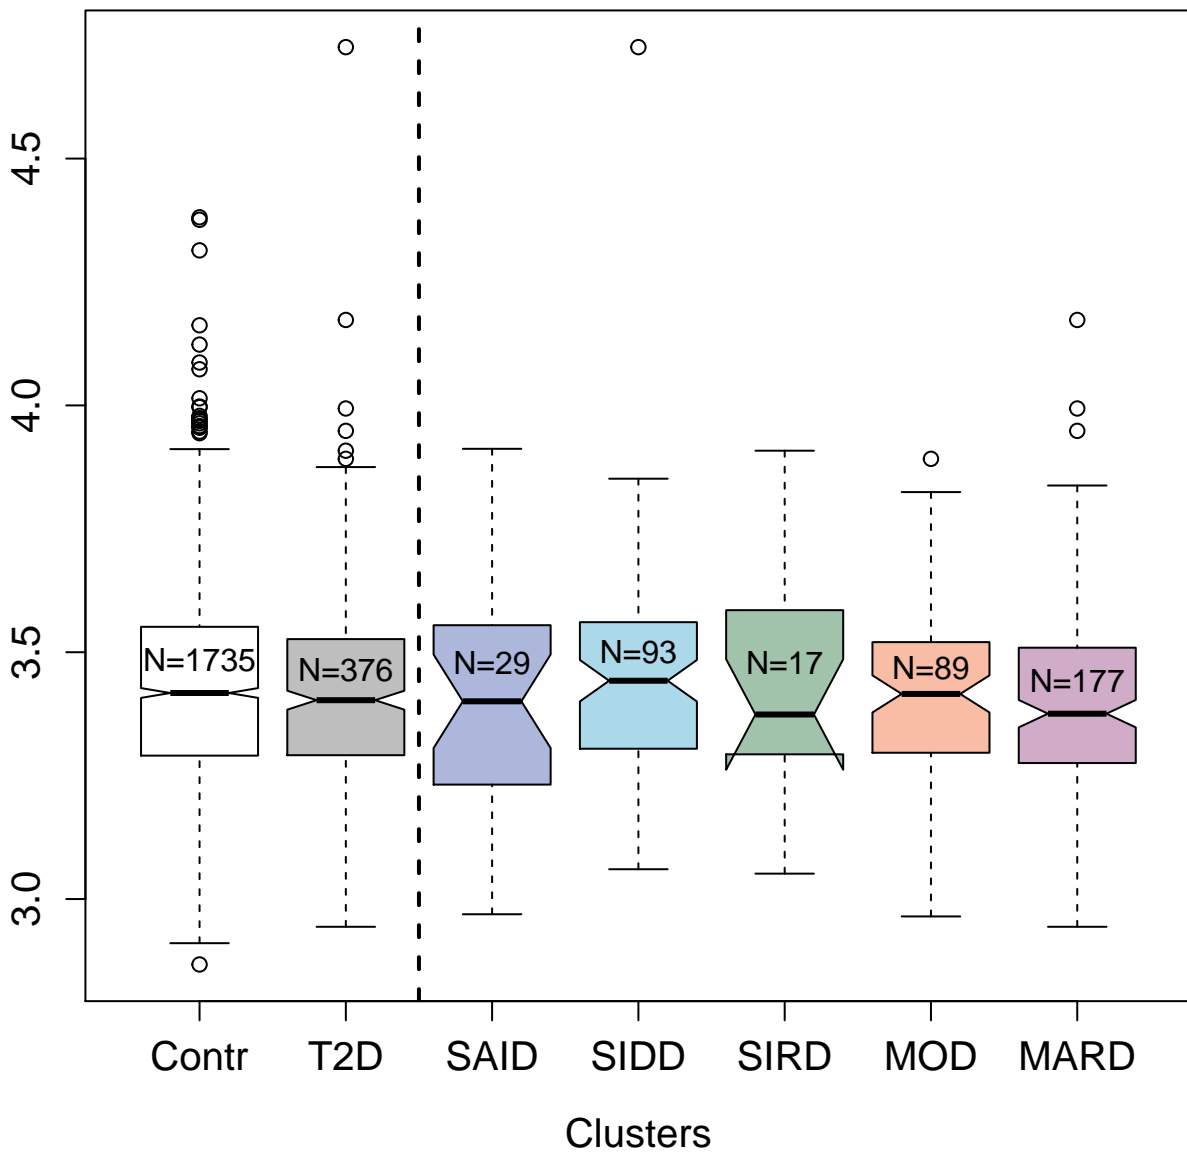

3489-9\_2 : Ciliary neurotrophic factor

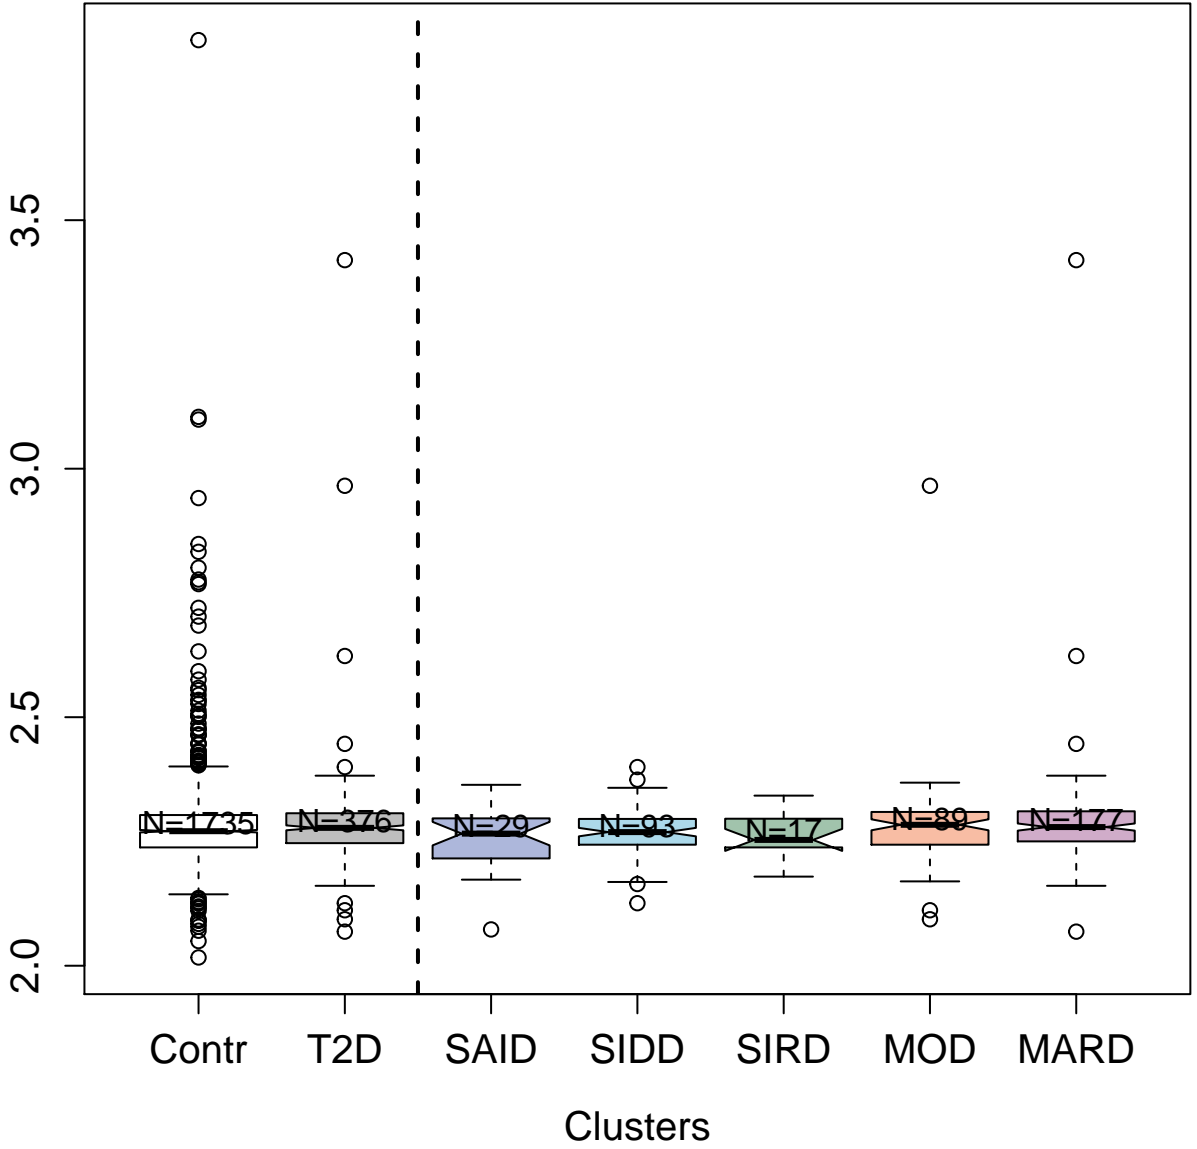

4553-65\_3 : Hepatoma-derived growth factor-related protein 2

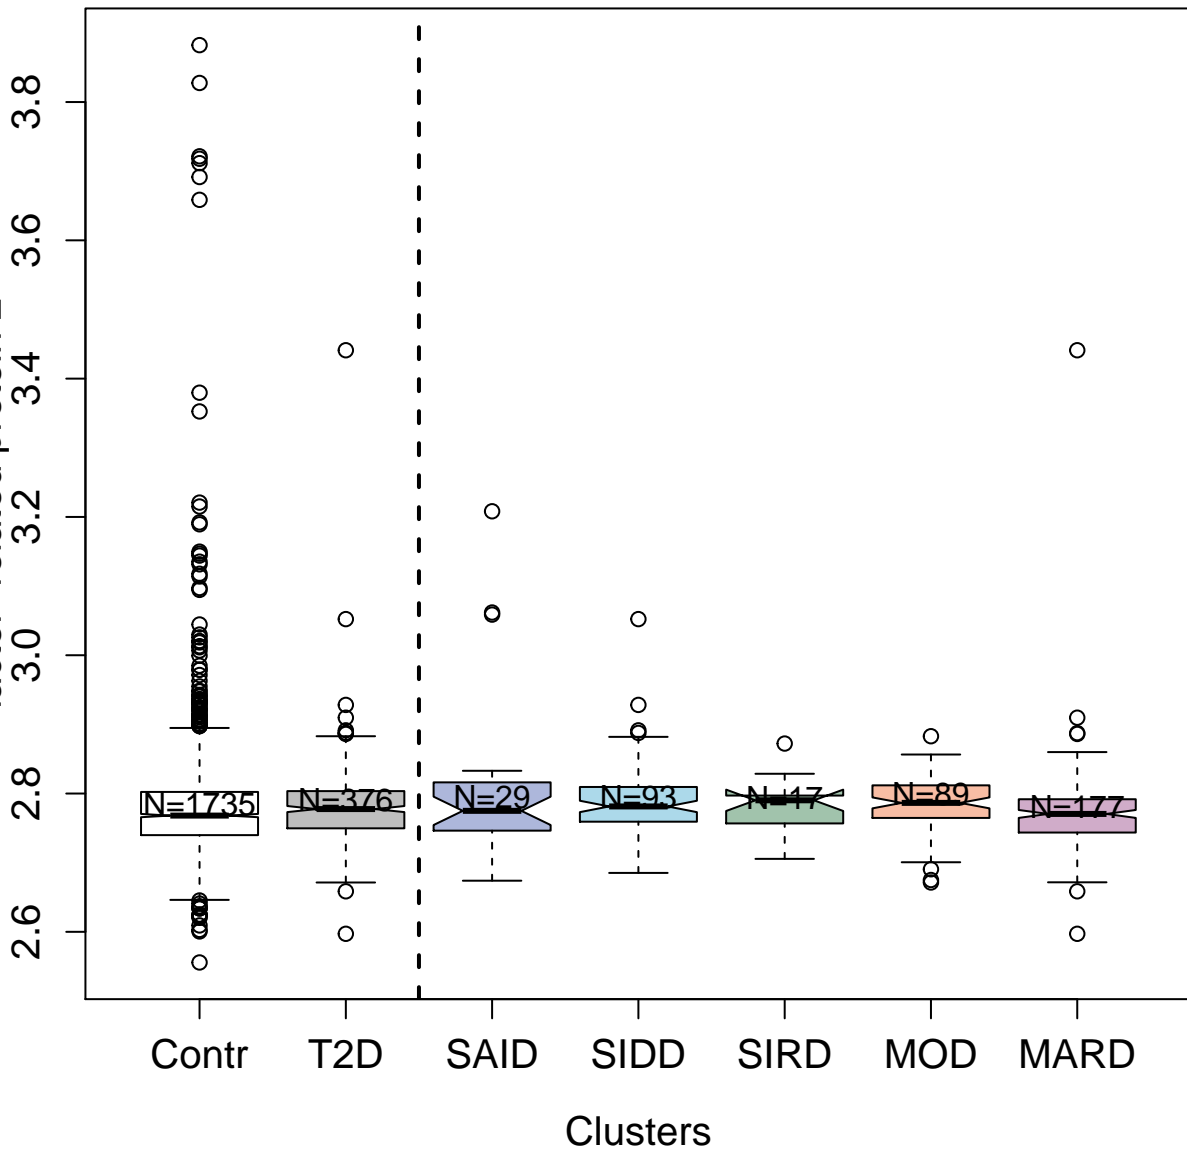



3000-66\_1 : Mannose-binding protein C

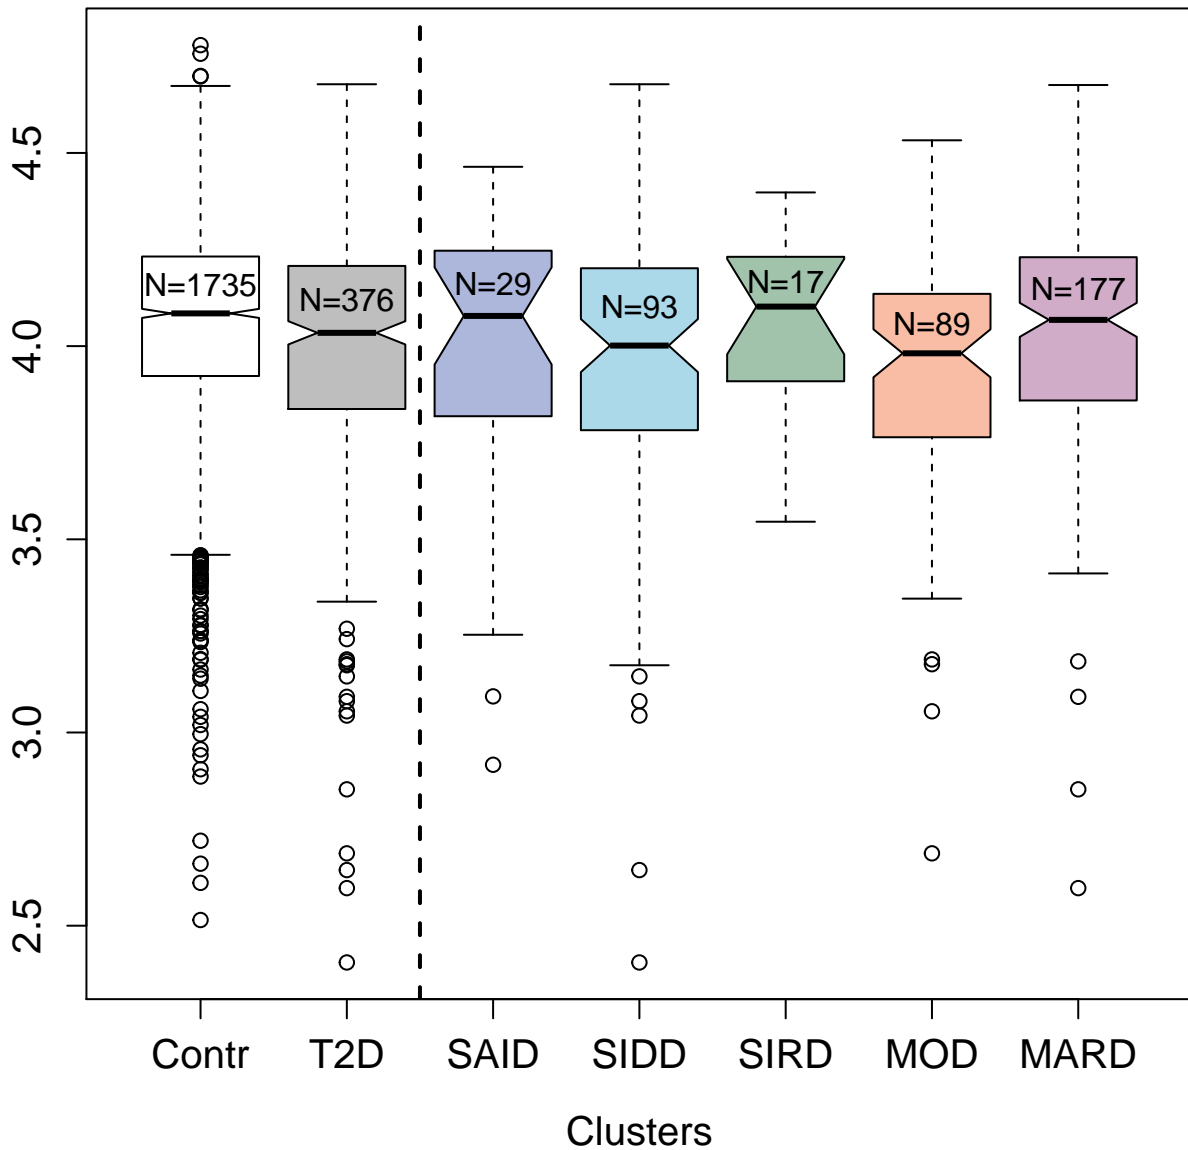

14134-49\_3 : Amphoterin-induced protein 2

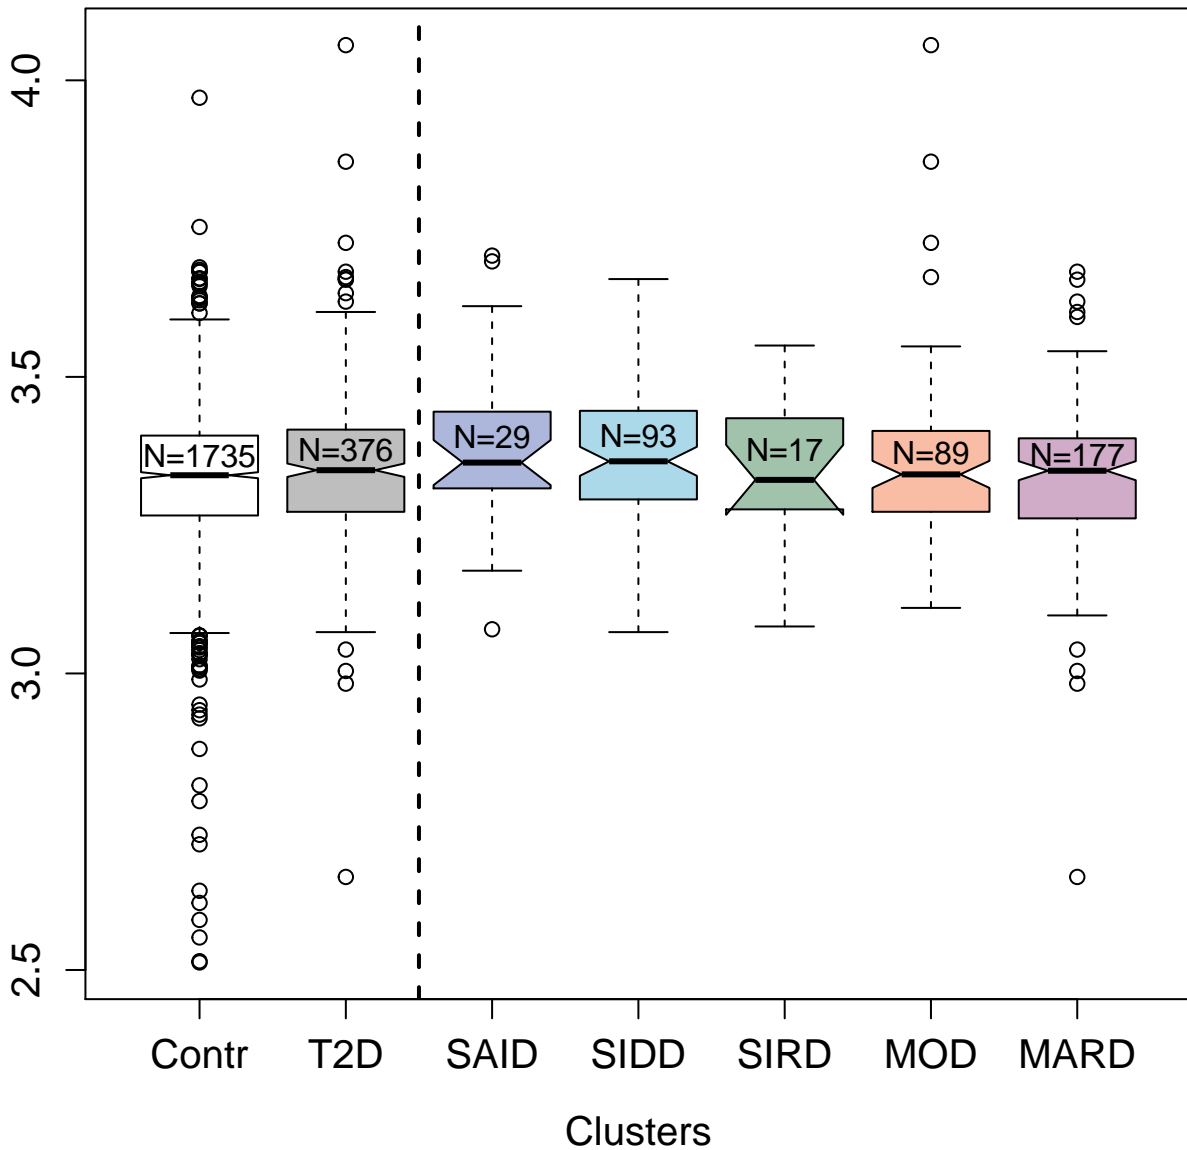

4151-6\_2 : Plasminogen

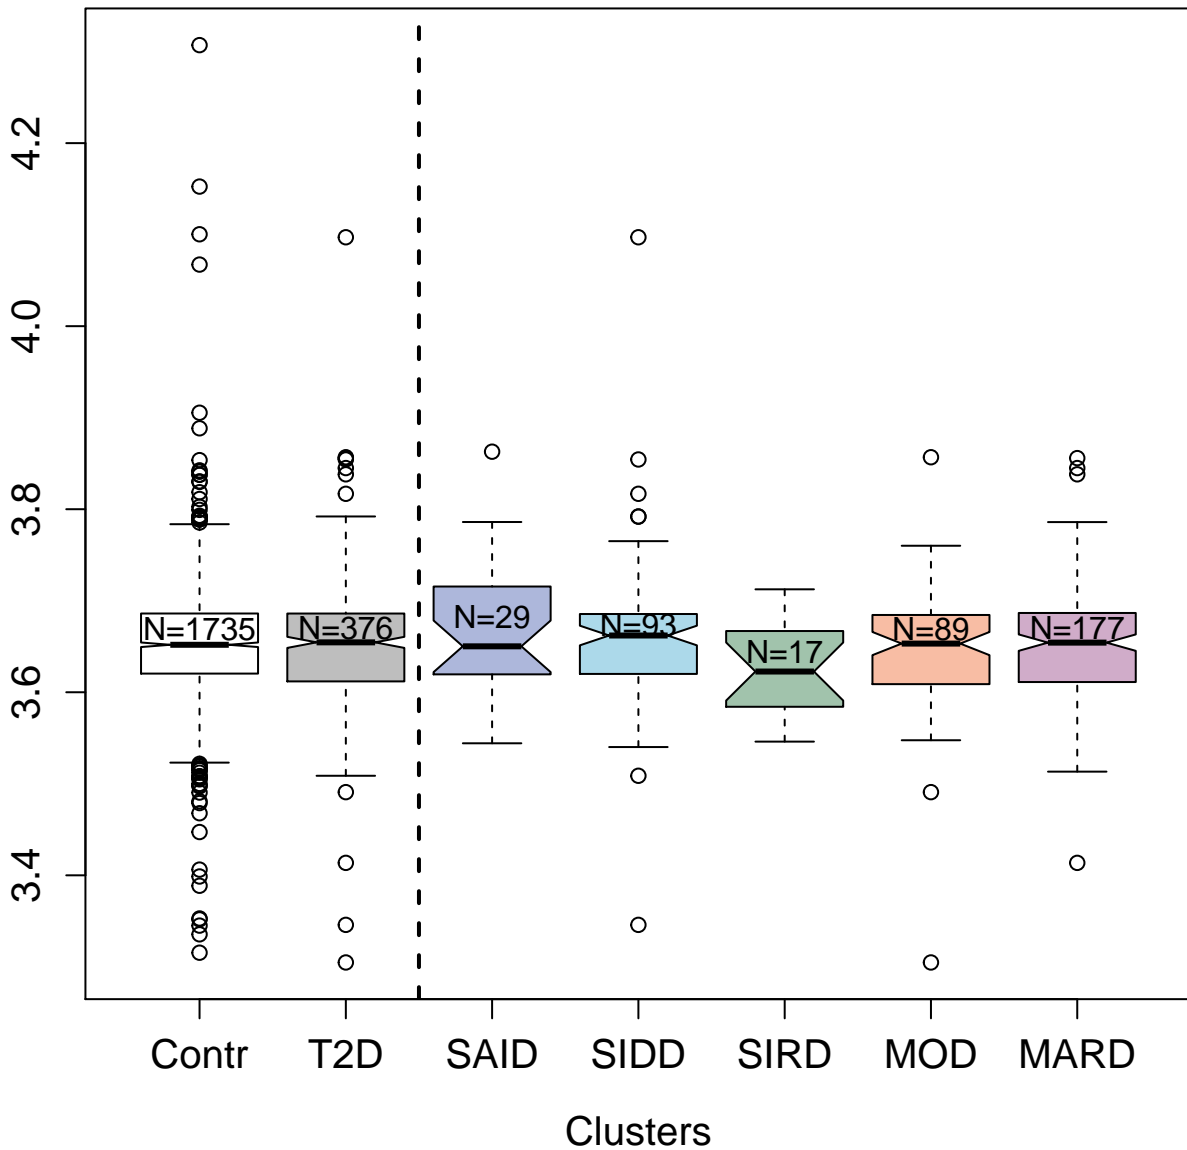

5202-4\_3 : Peptidyl-prolyl cis-trans isomerase D

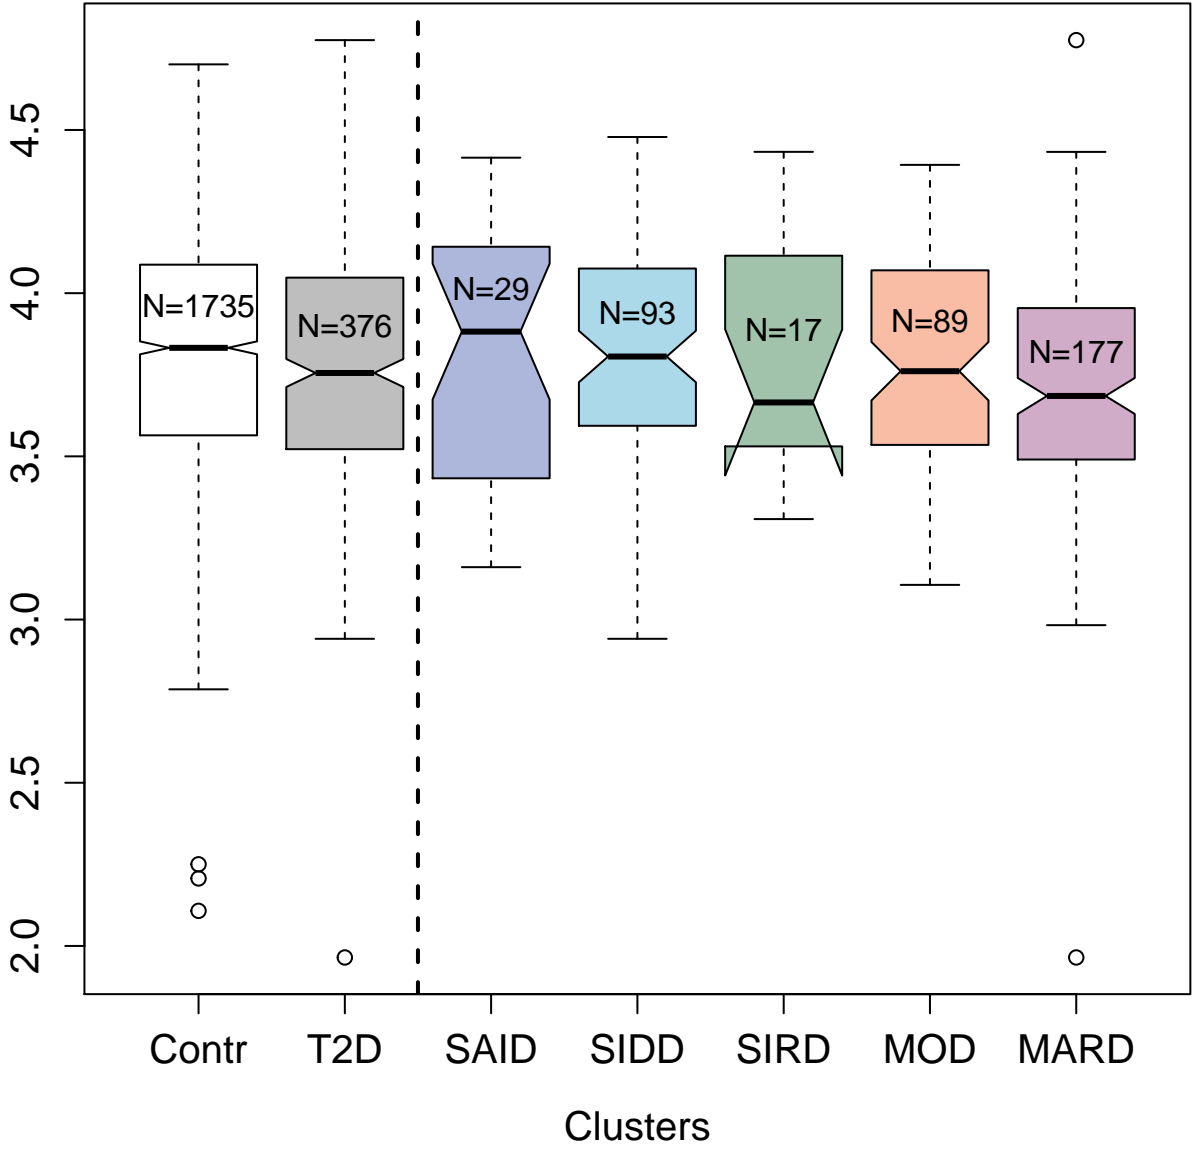

4146-58\_2 : Neurotrophin-4

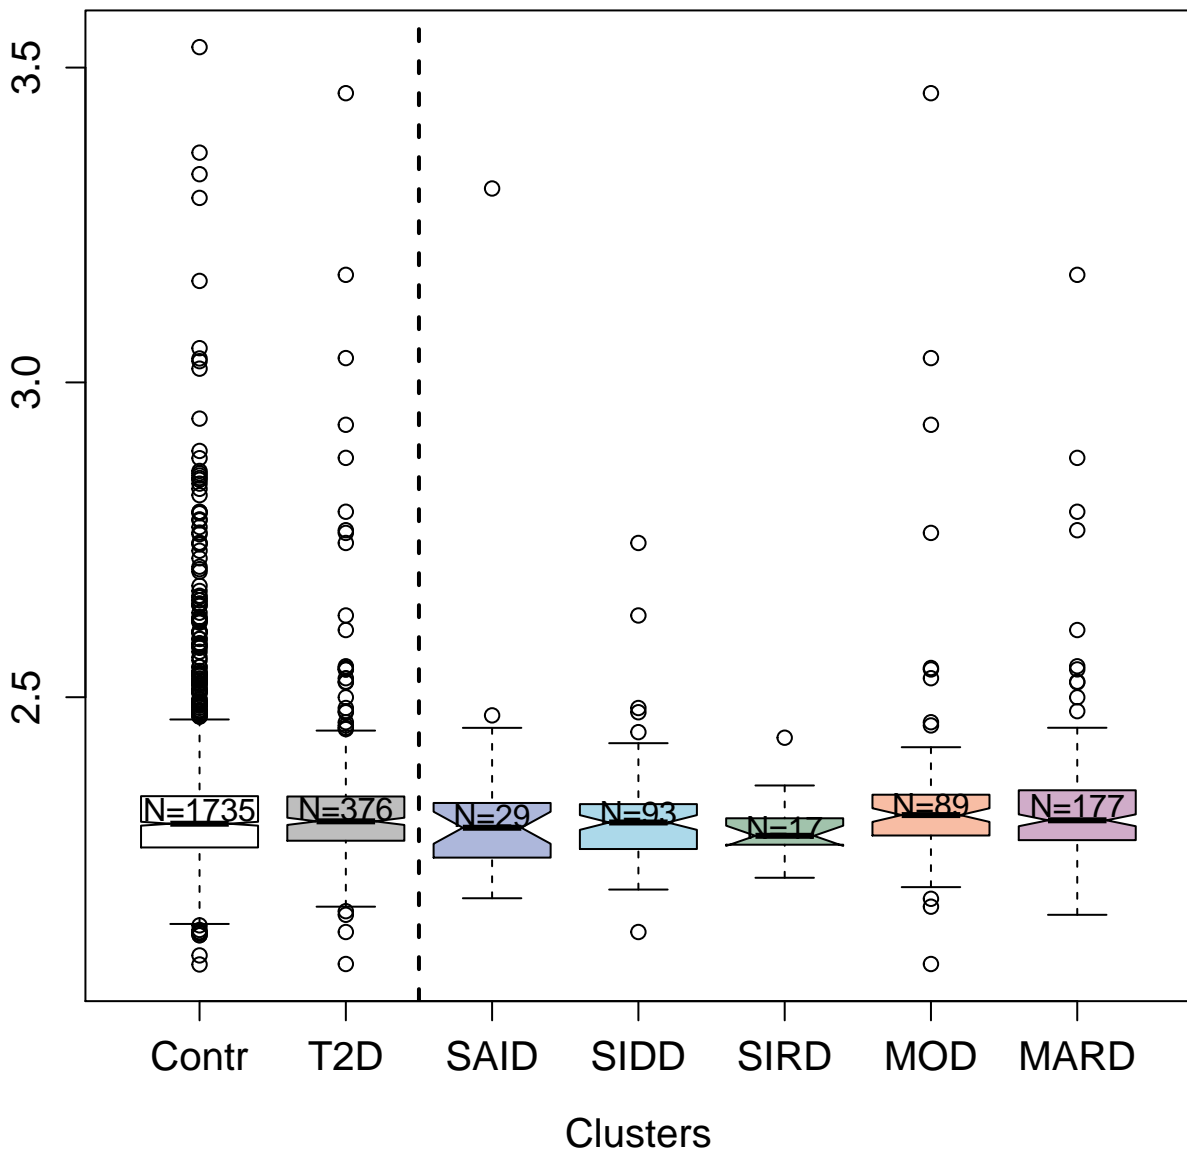

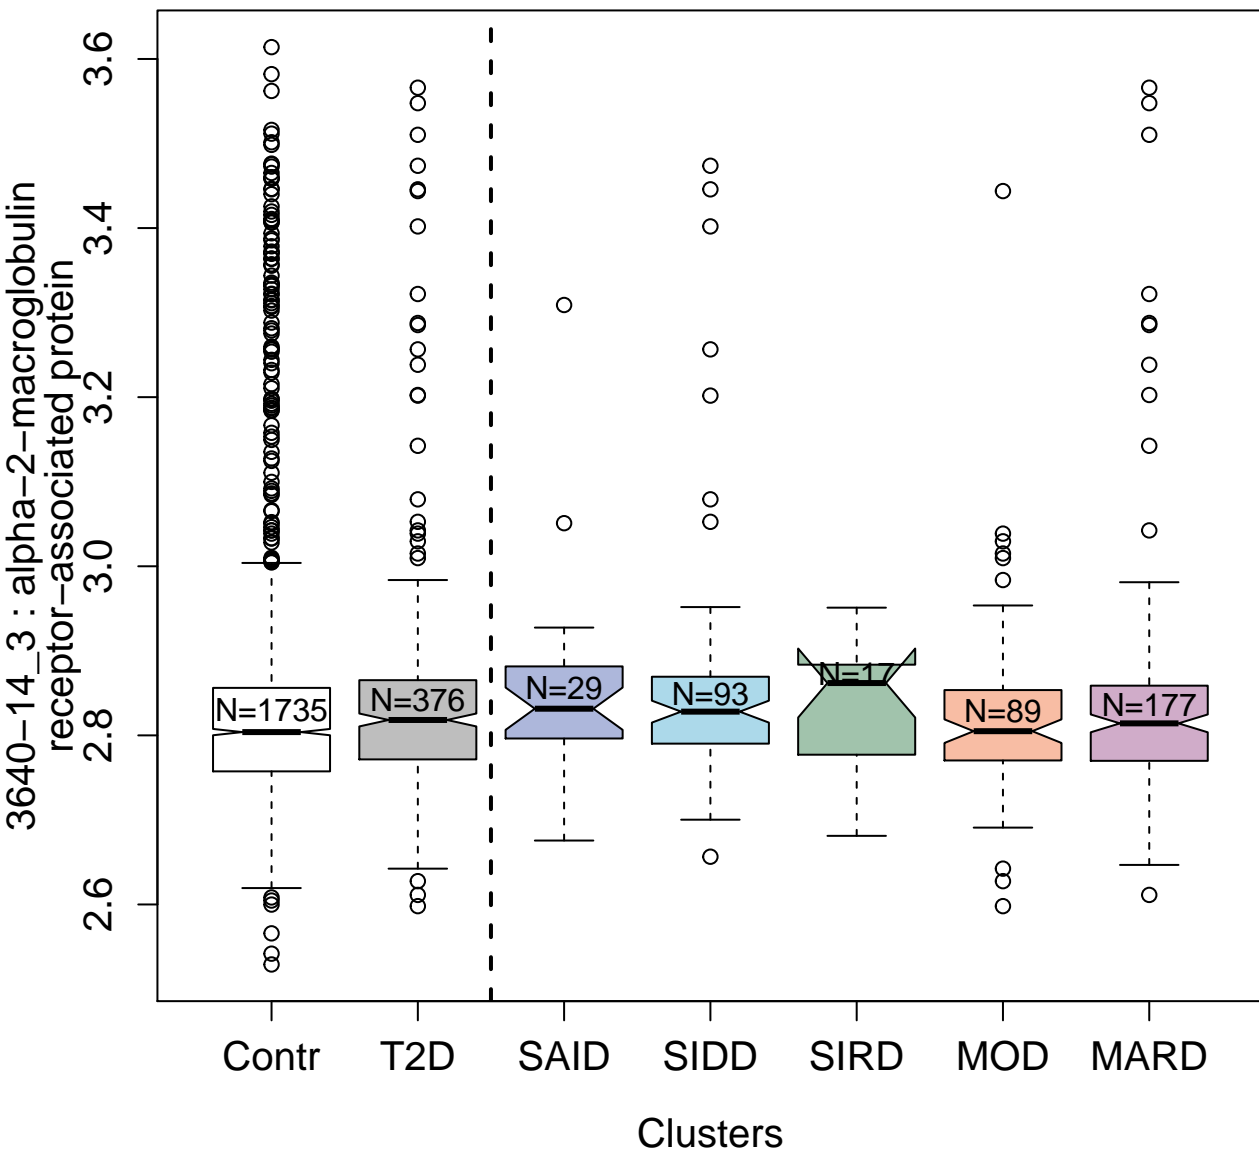

4318-12\_3 : Tyrosine-protein phosphatase non-receptor type 6

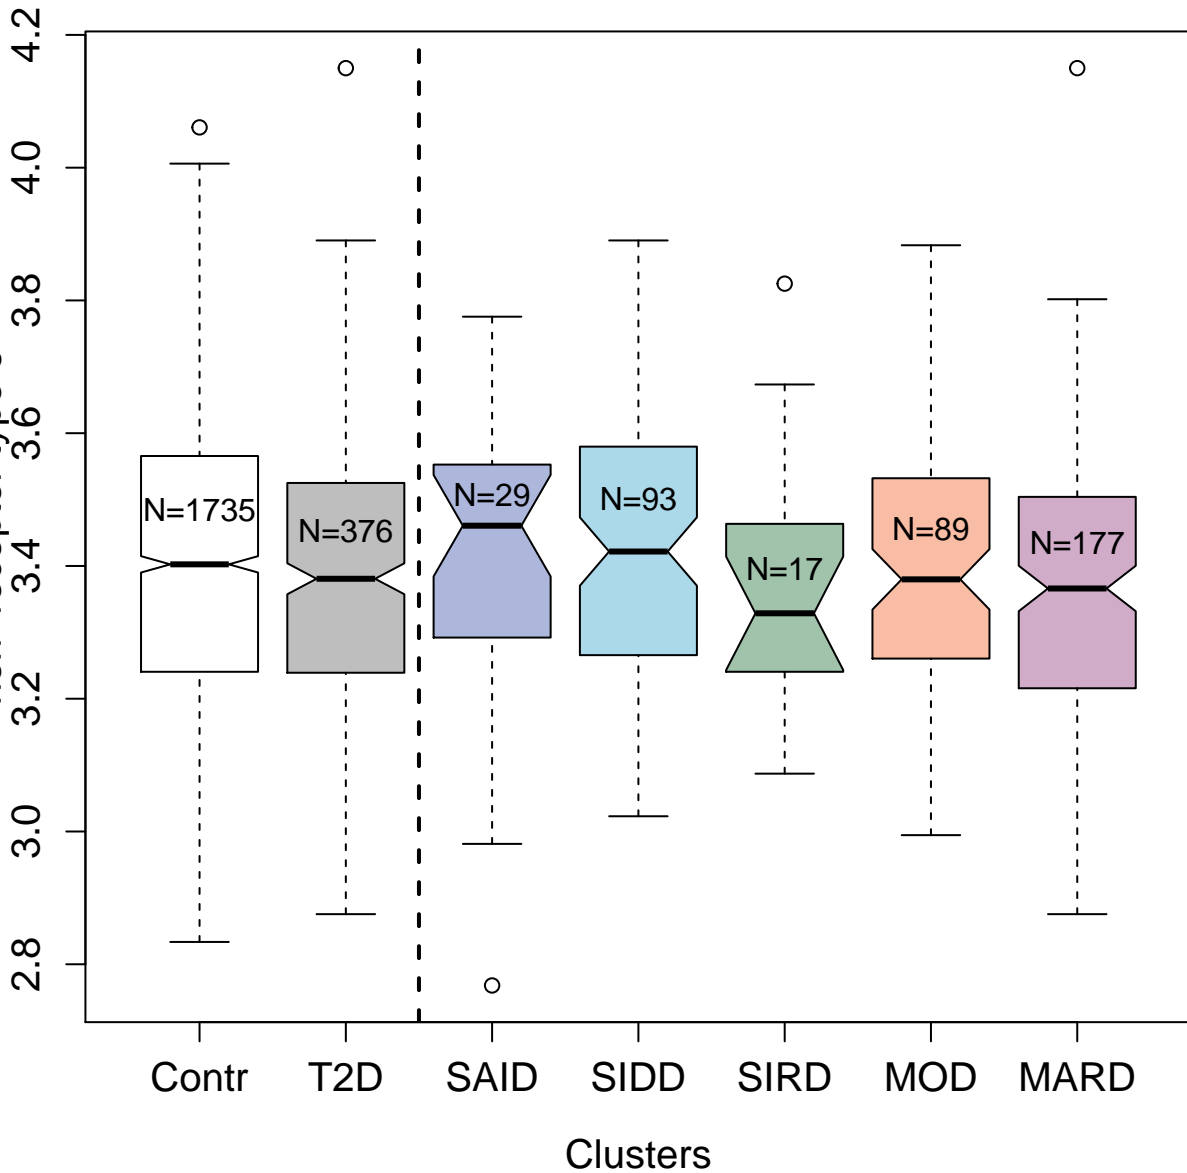

2975-19\_2 : Connective tissue growth factor

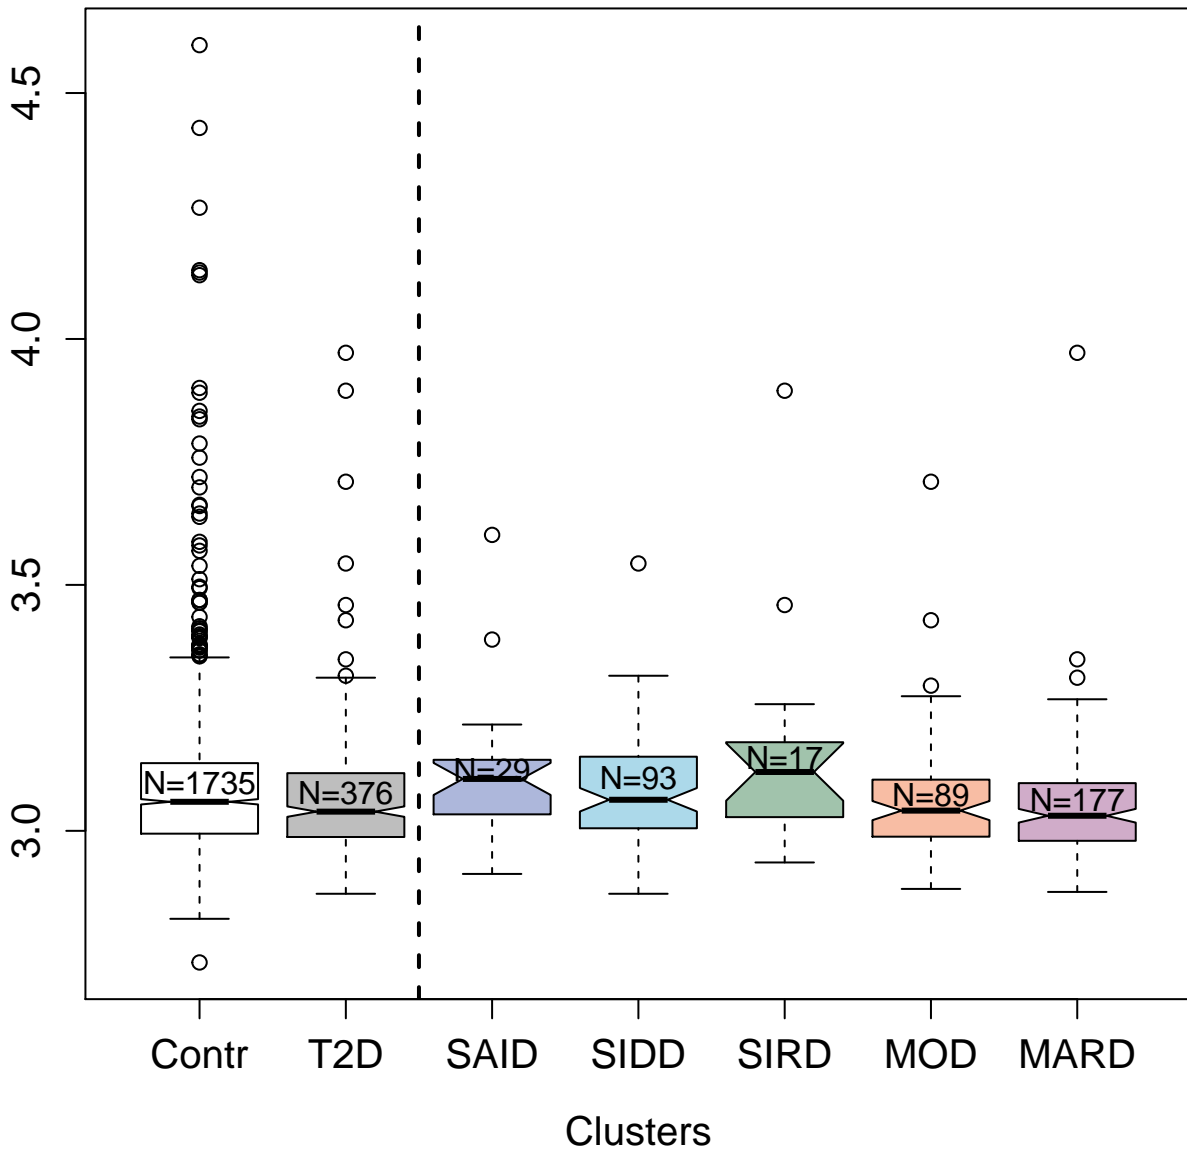



# 3473-78\_2 : Thrombopoietin Receptor

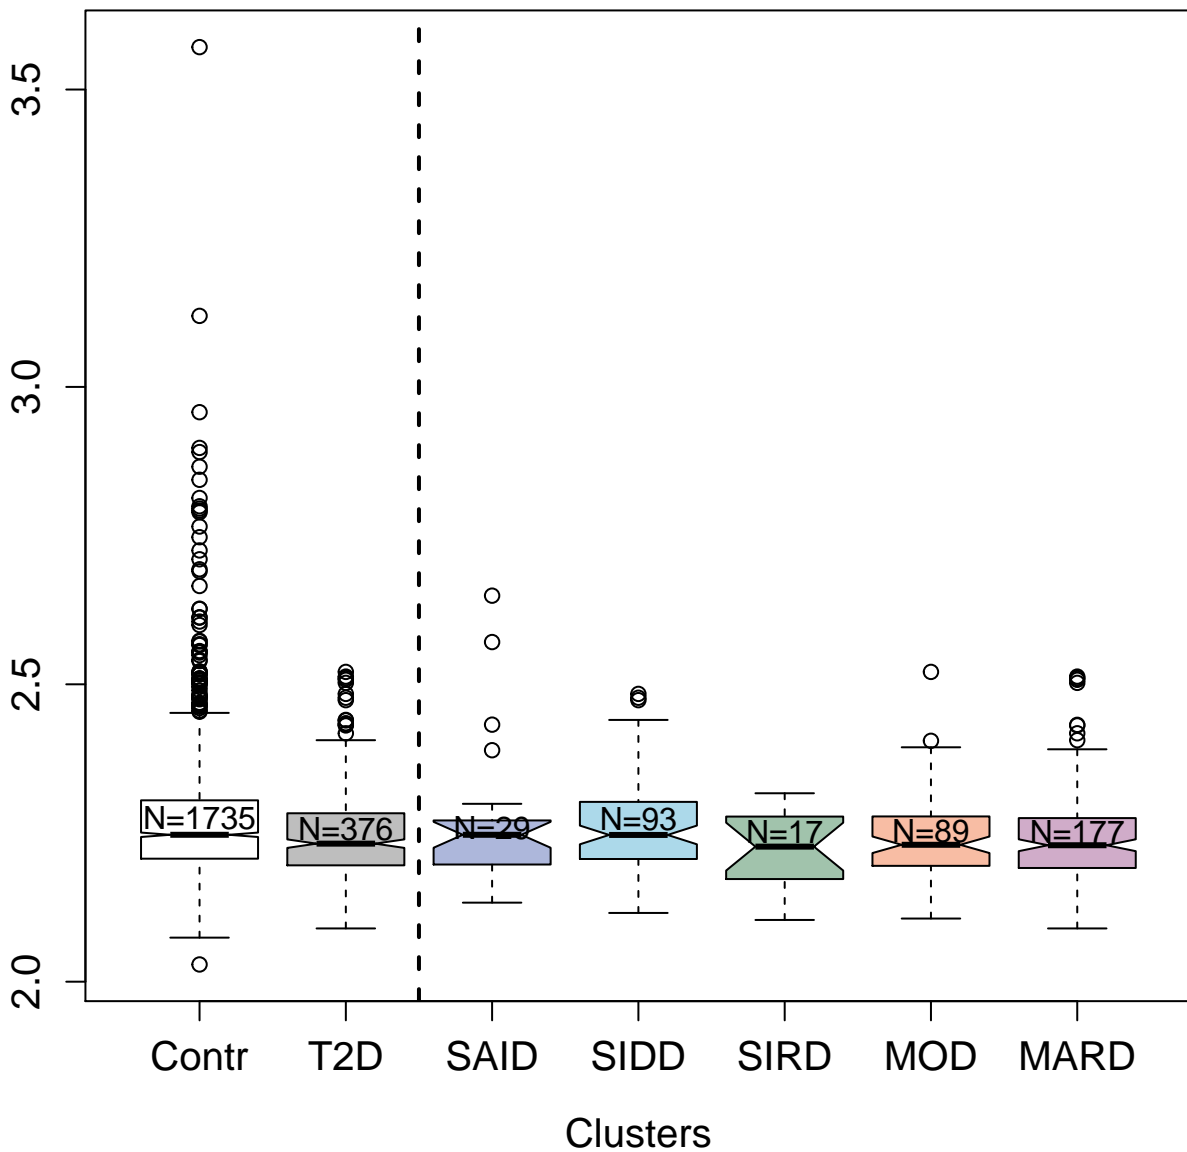

4978-54\_2 : Drebrin-like protein

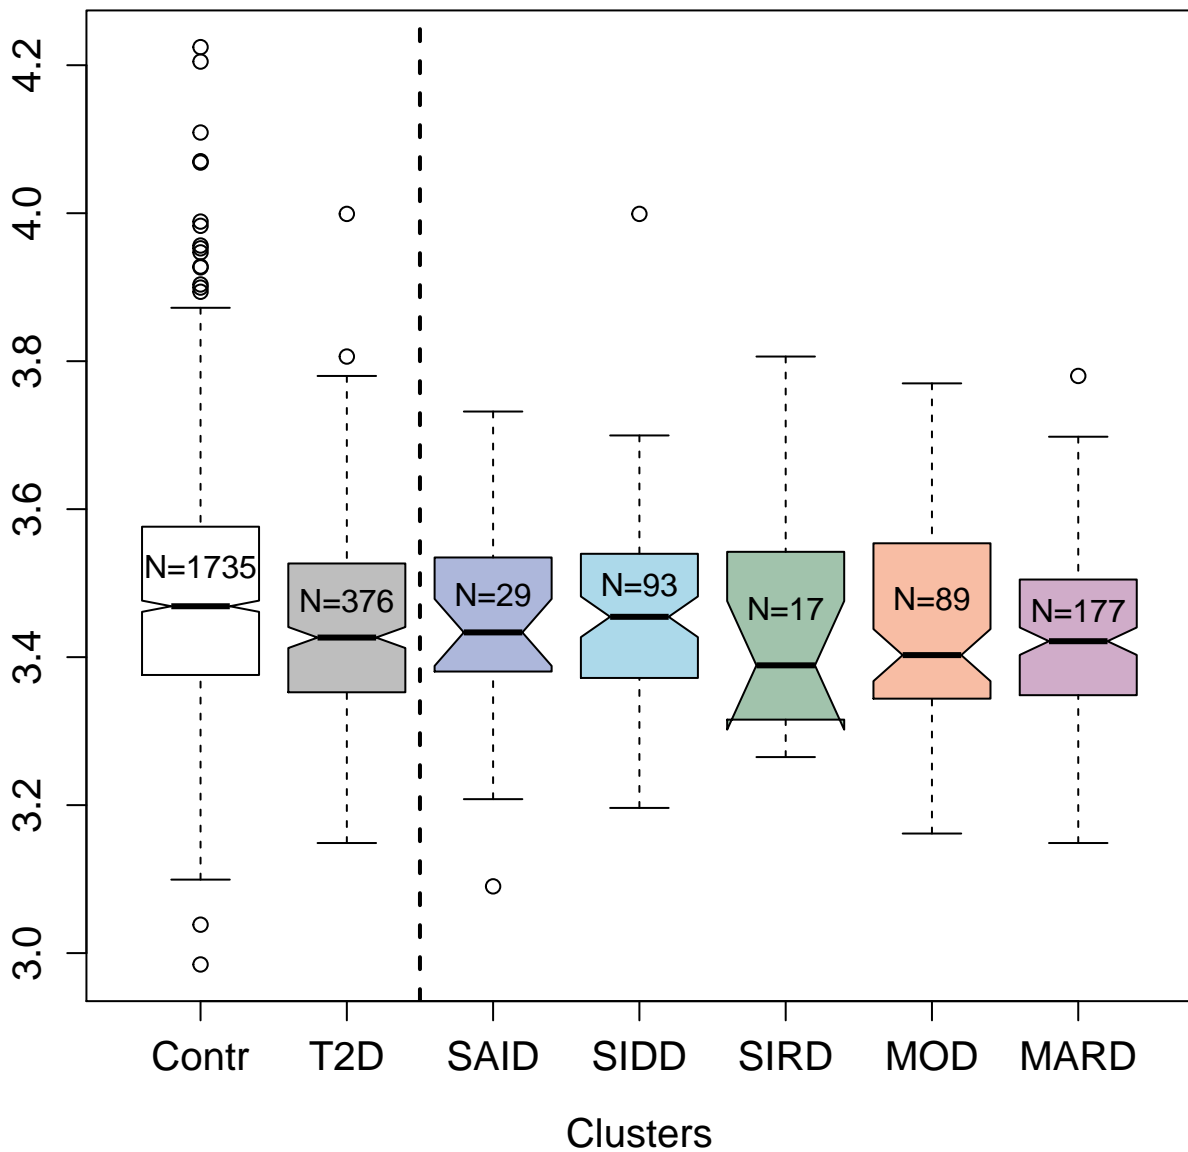

5015-15\_1 : Platelet-activating factor acetylhydrolase

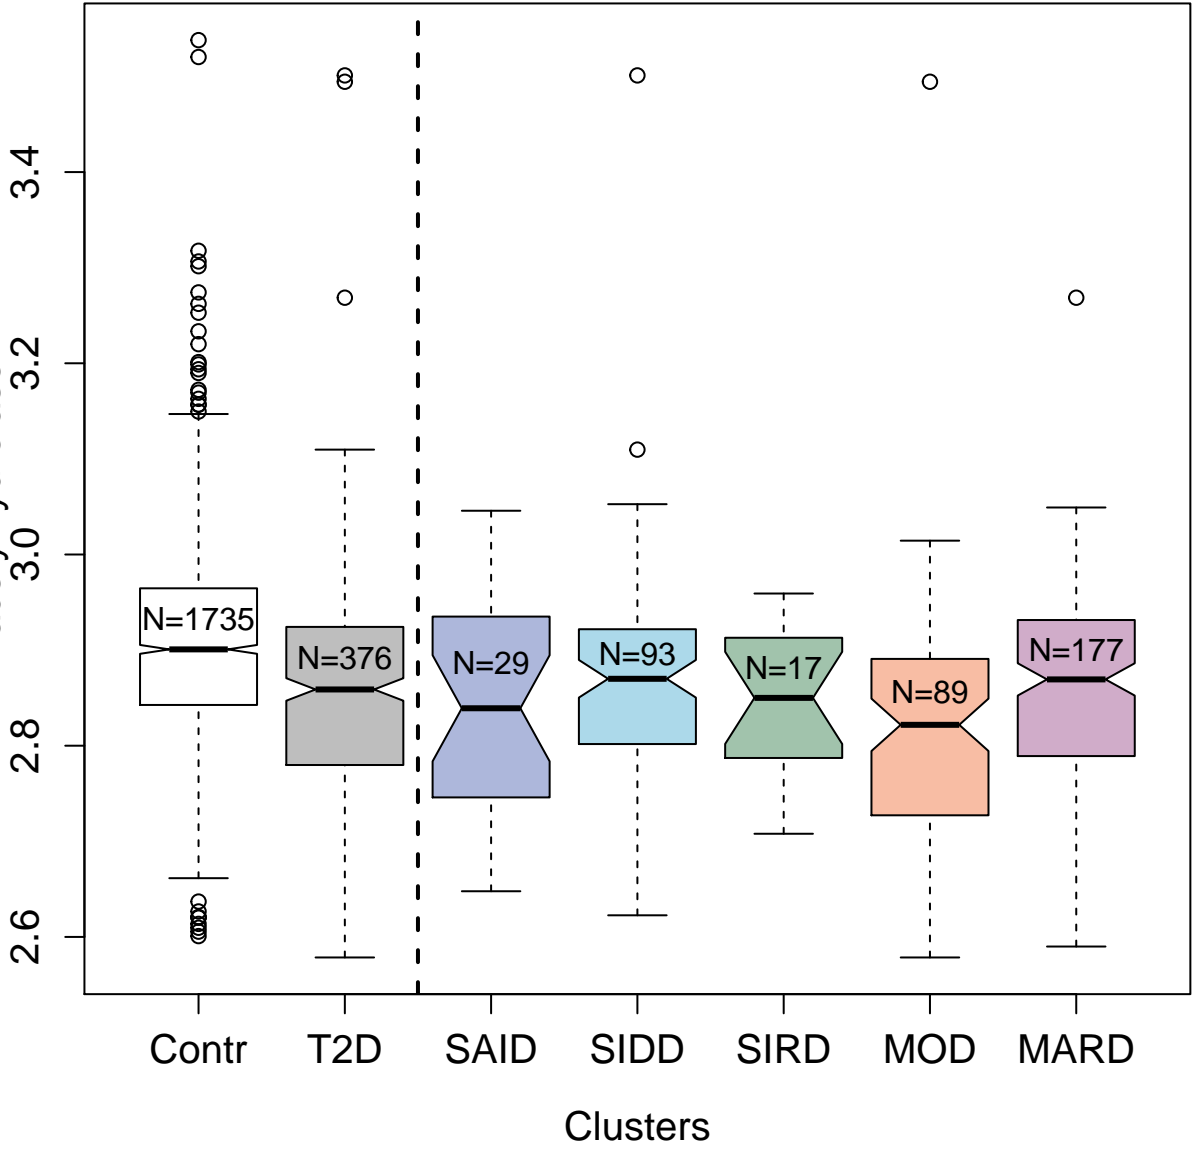

14157-21\_3: 14-3-3 protein epsilon

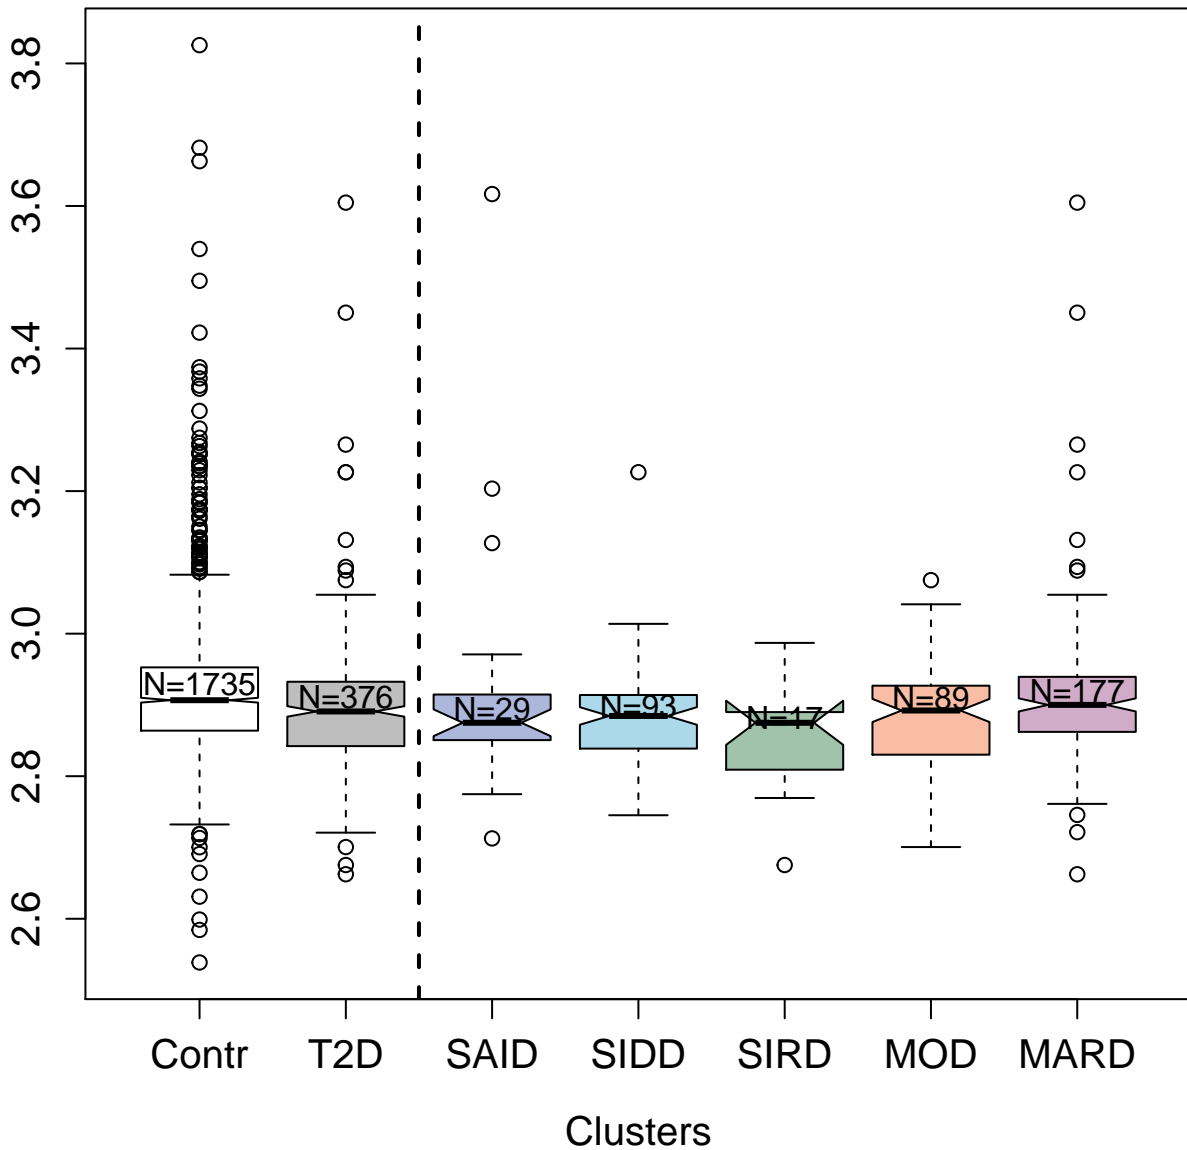

5488-74\_3 : Proto-oncogene tyrosine-protein kinase Src

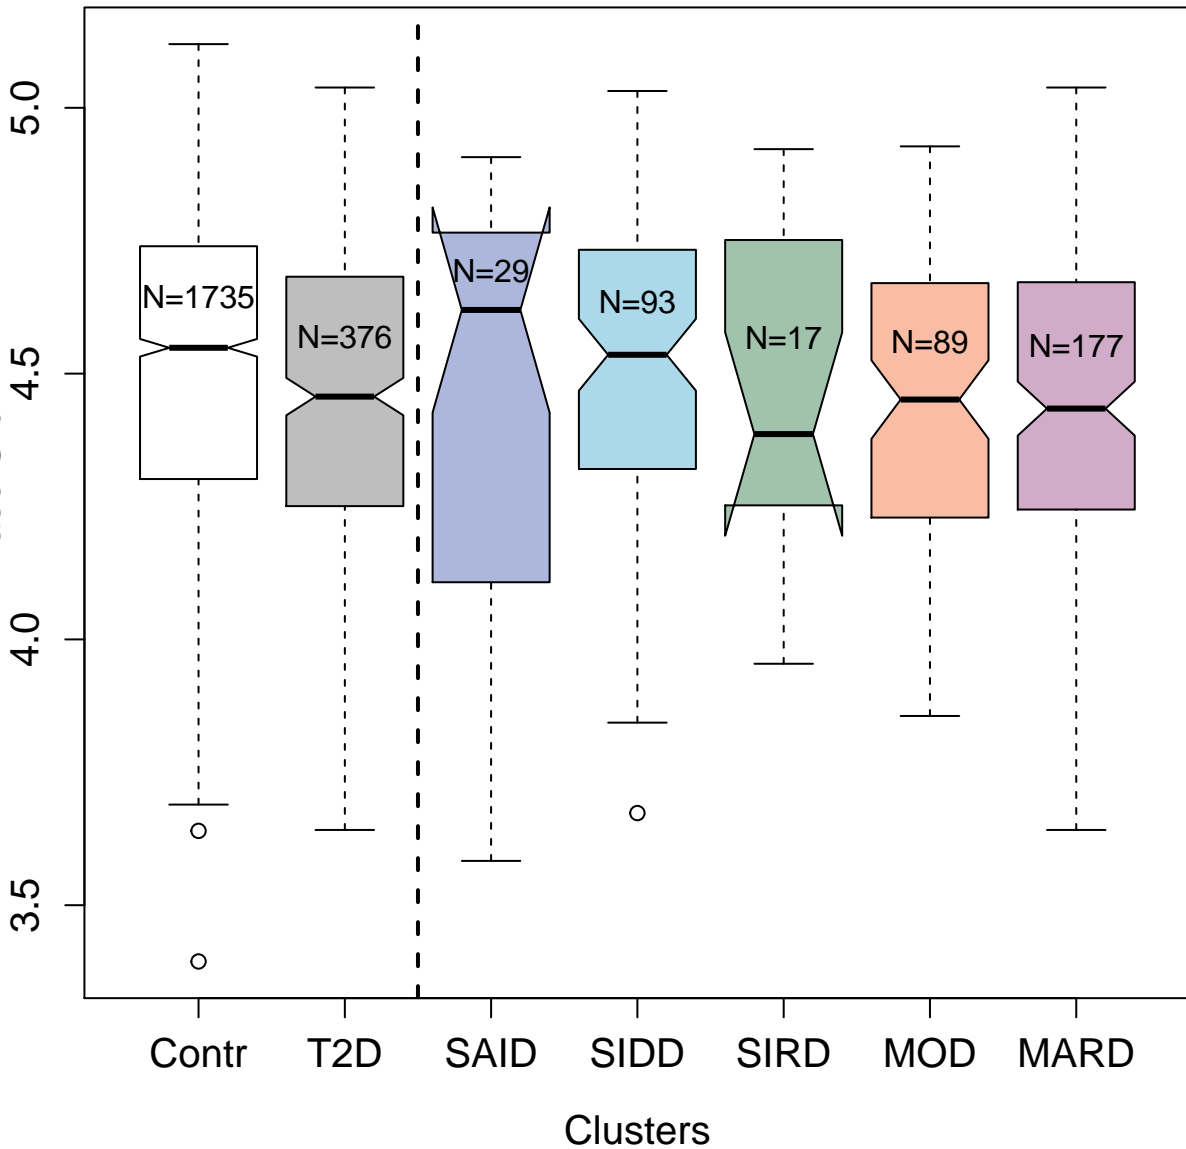

4878-3\_1 : Coagulation Factor X

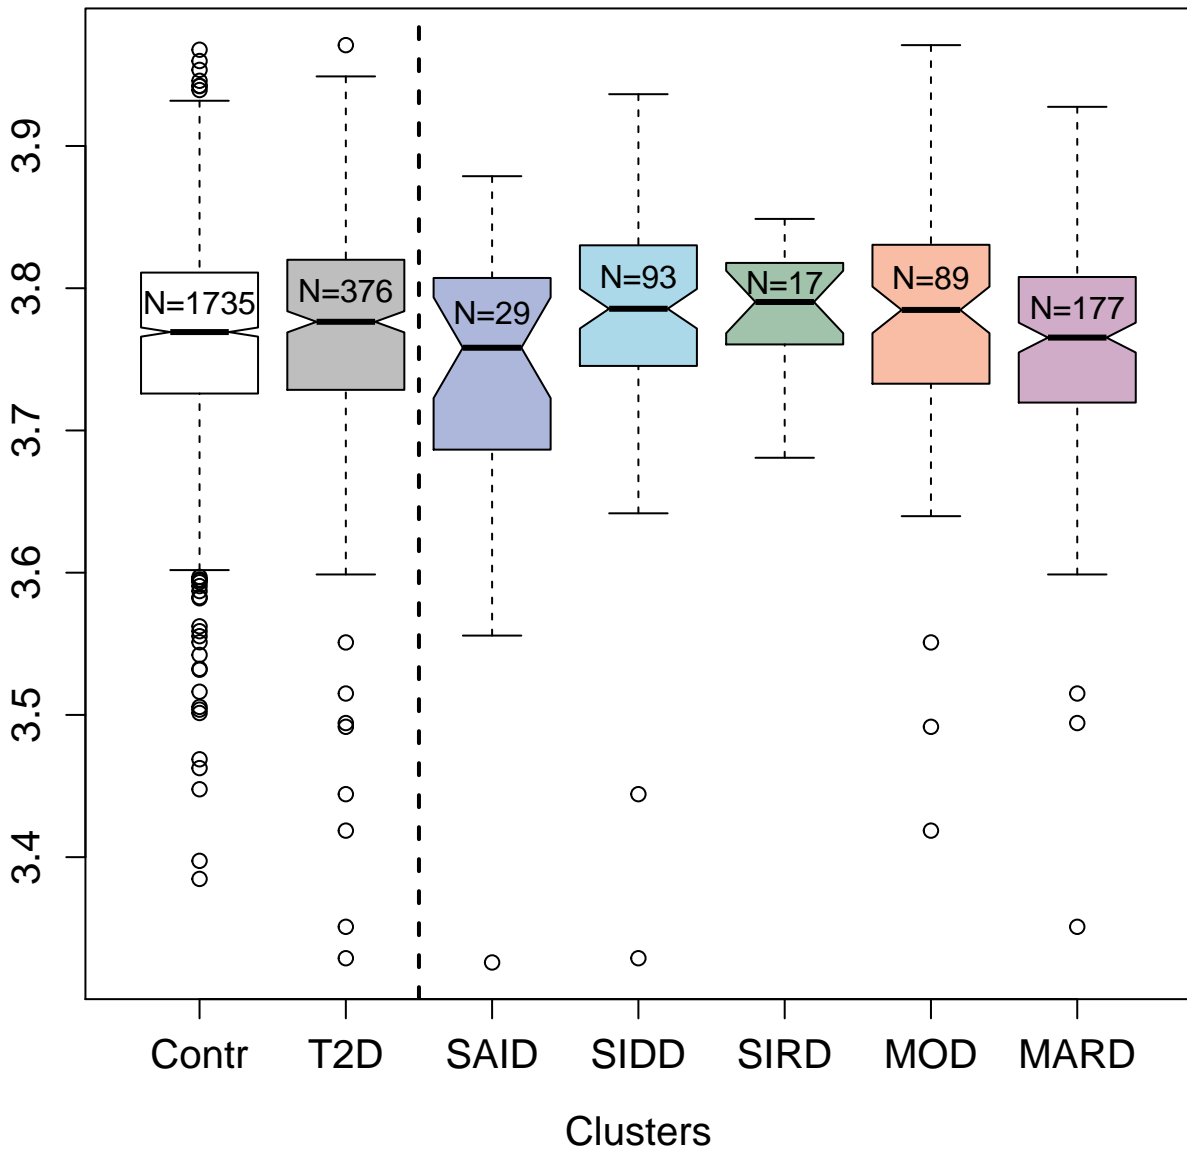

2871-73\_2 : DNA repair protein RAD51 homolog 1

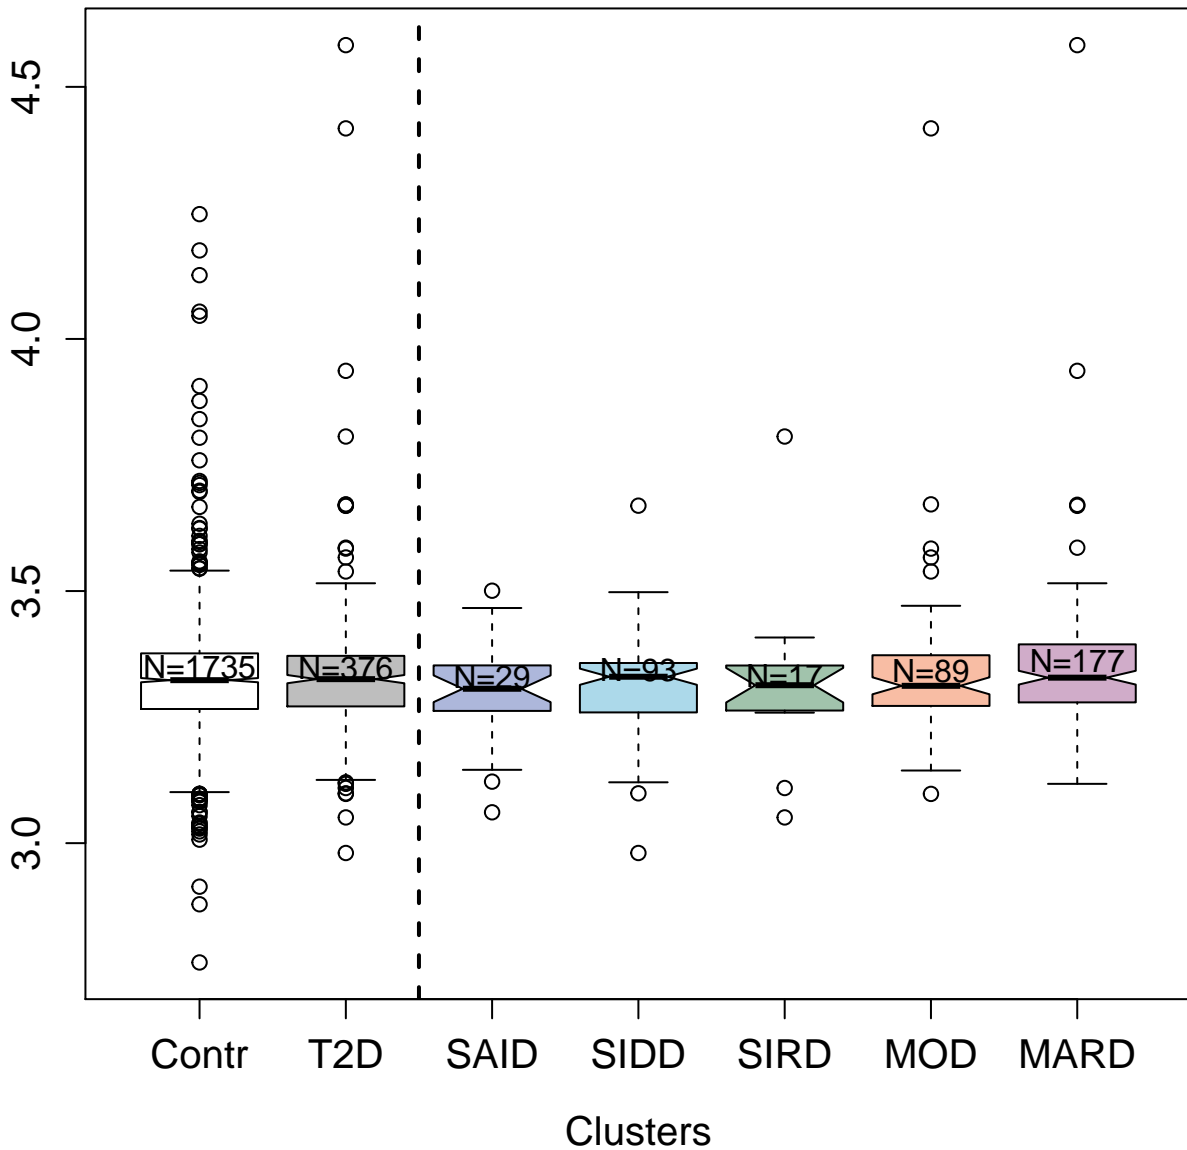

5021-13\_1 : Inorganic pyrophosphatase

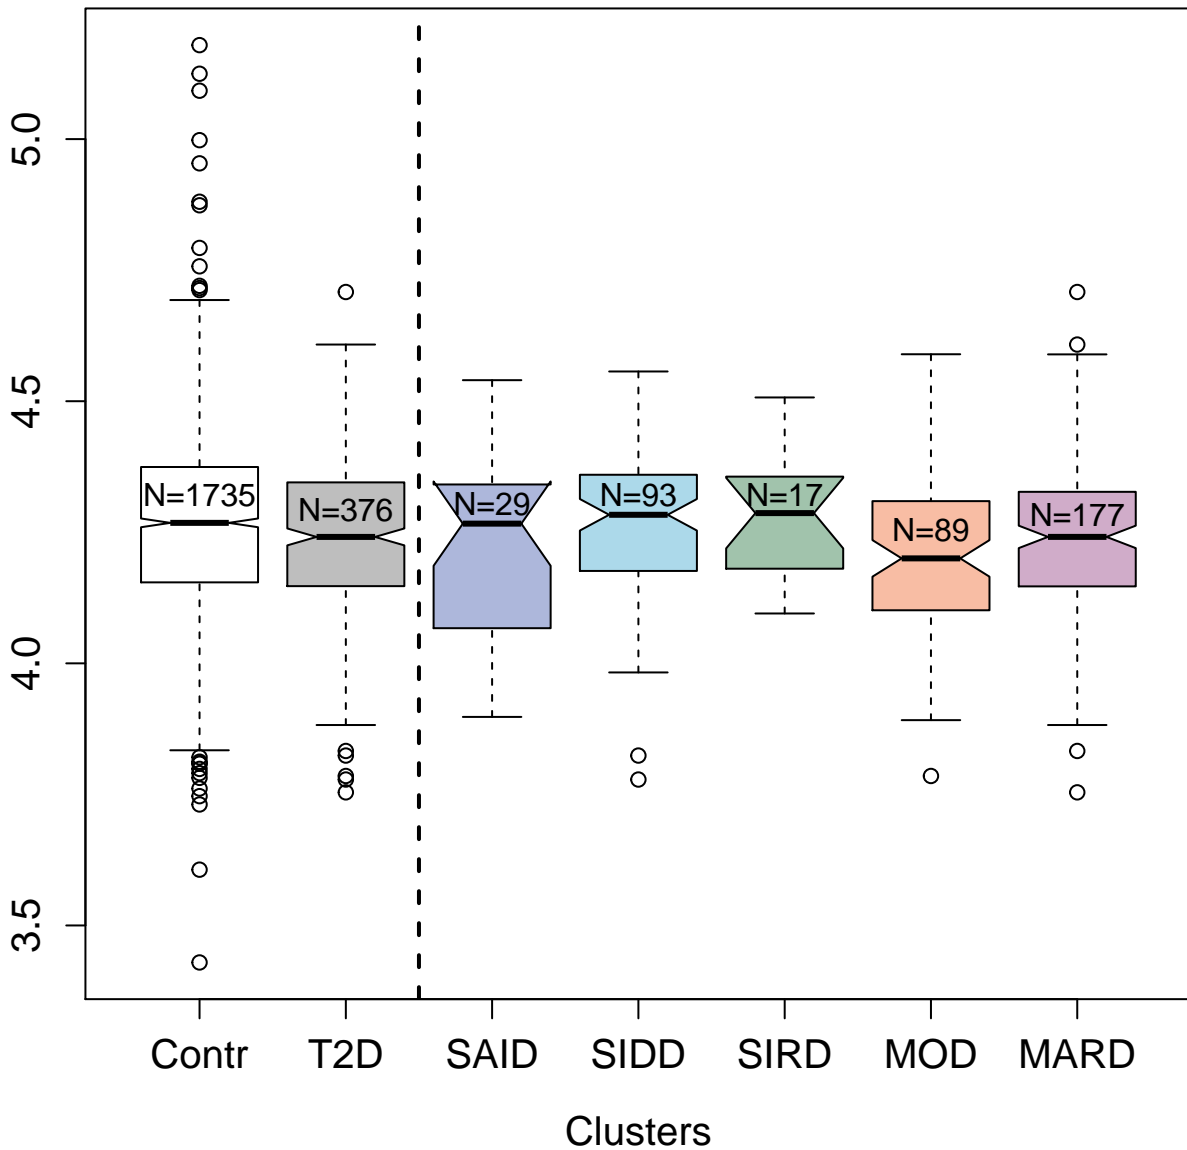



5858-6\_5 : 14-3-3 protein zeta/delta

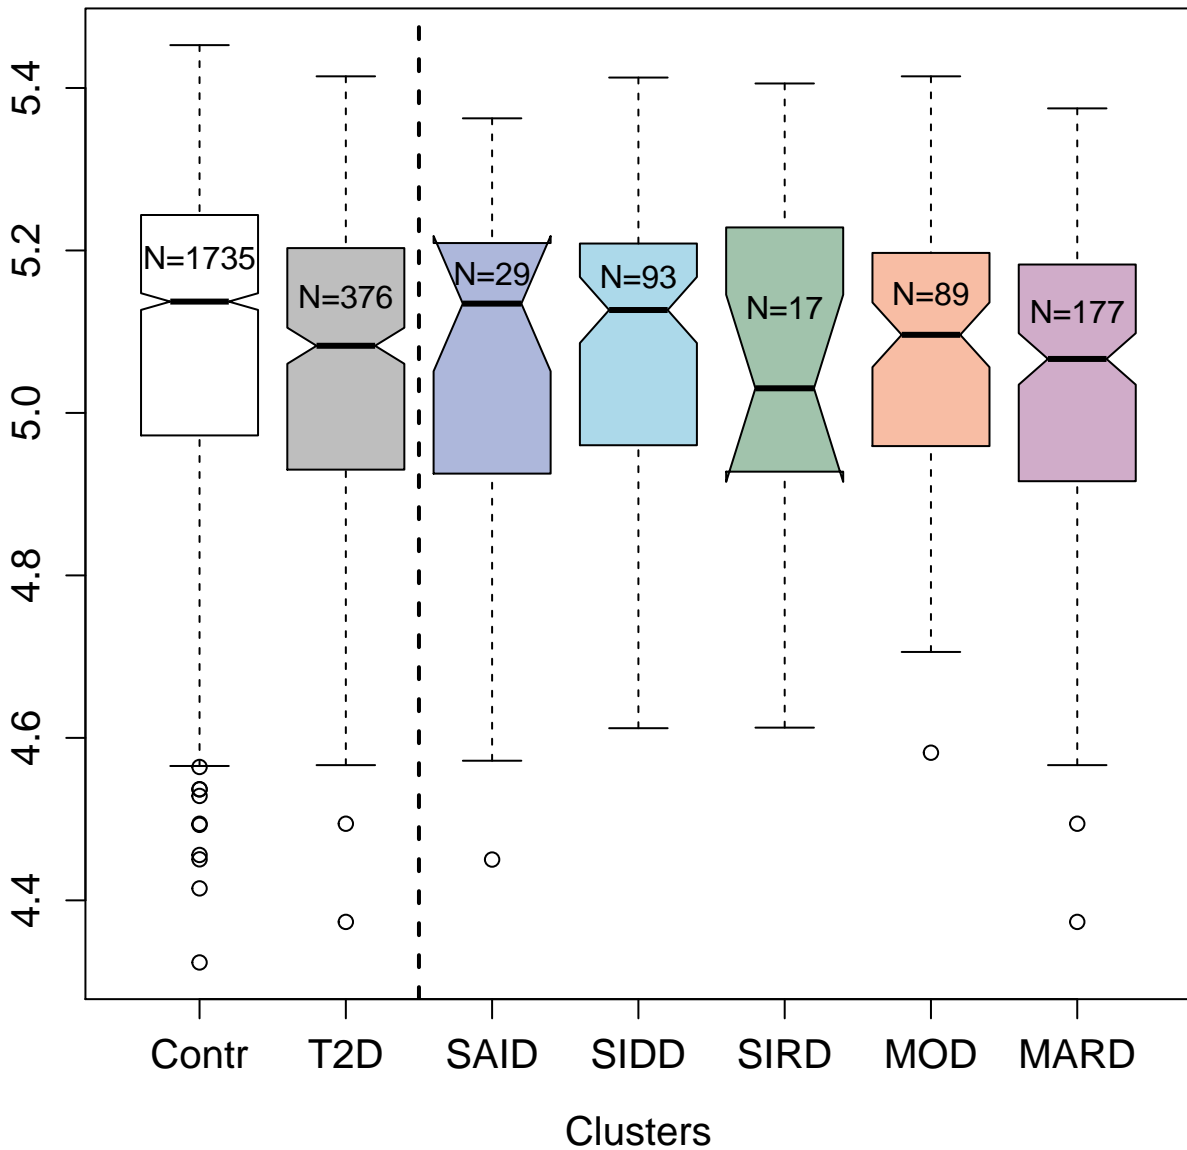

3534-14\_2 : CD40 ligand

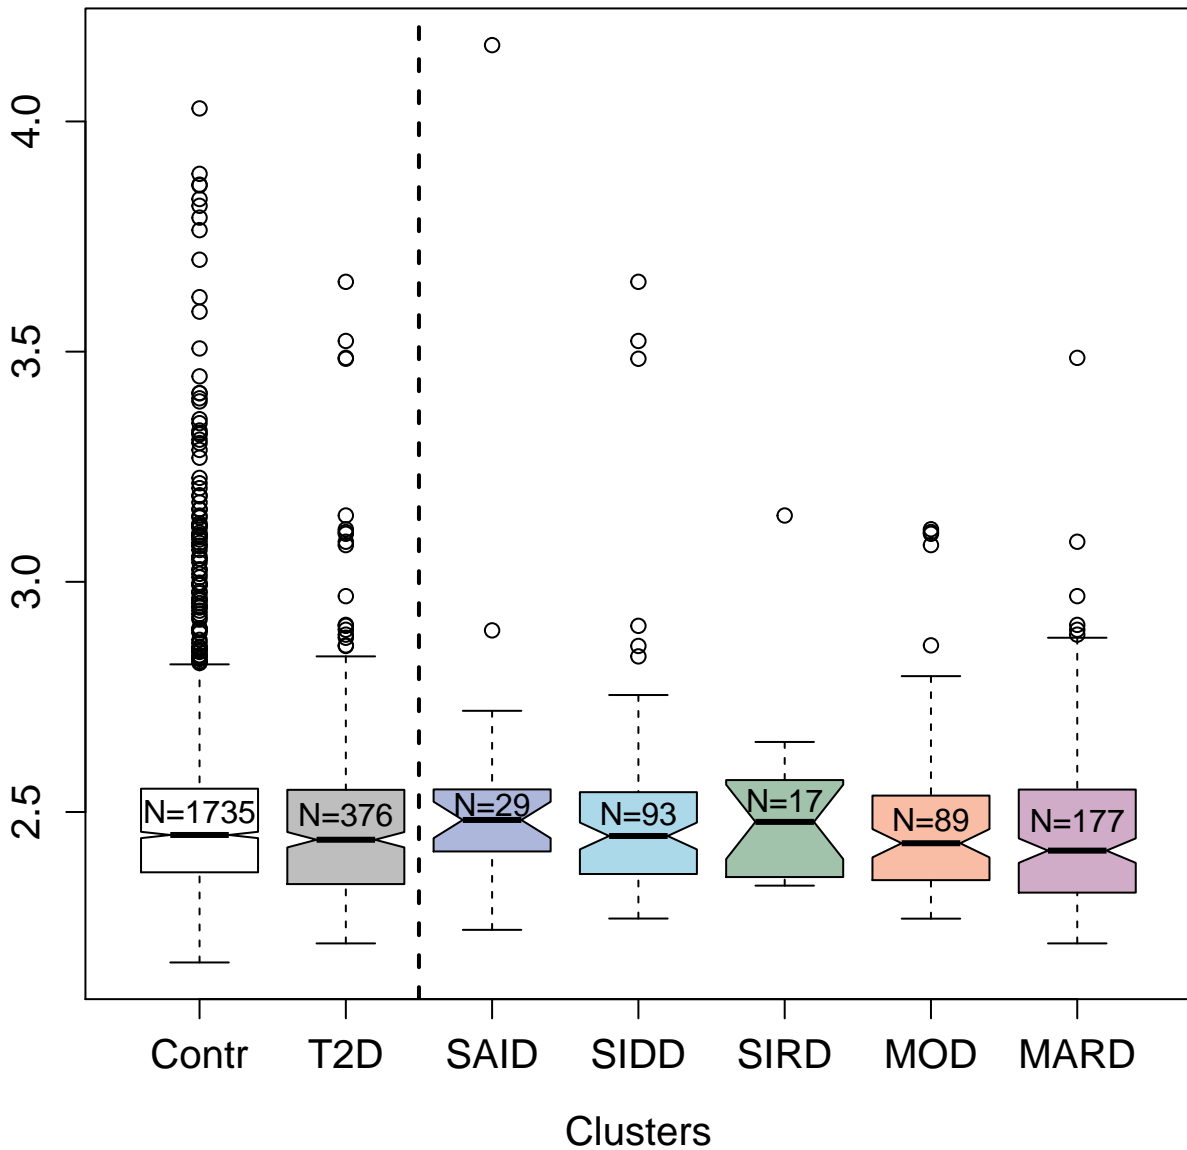

5936-53\_3: Tumor necrosis factor

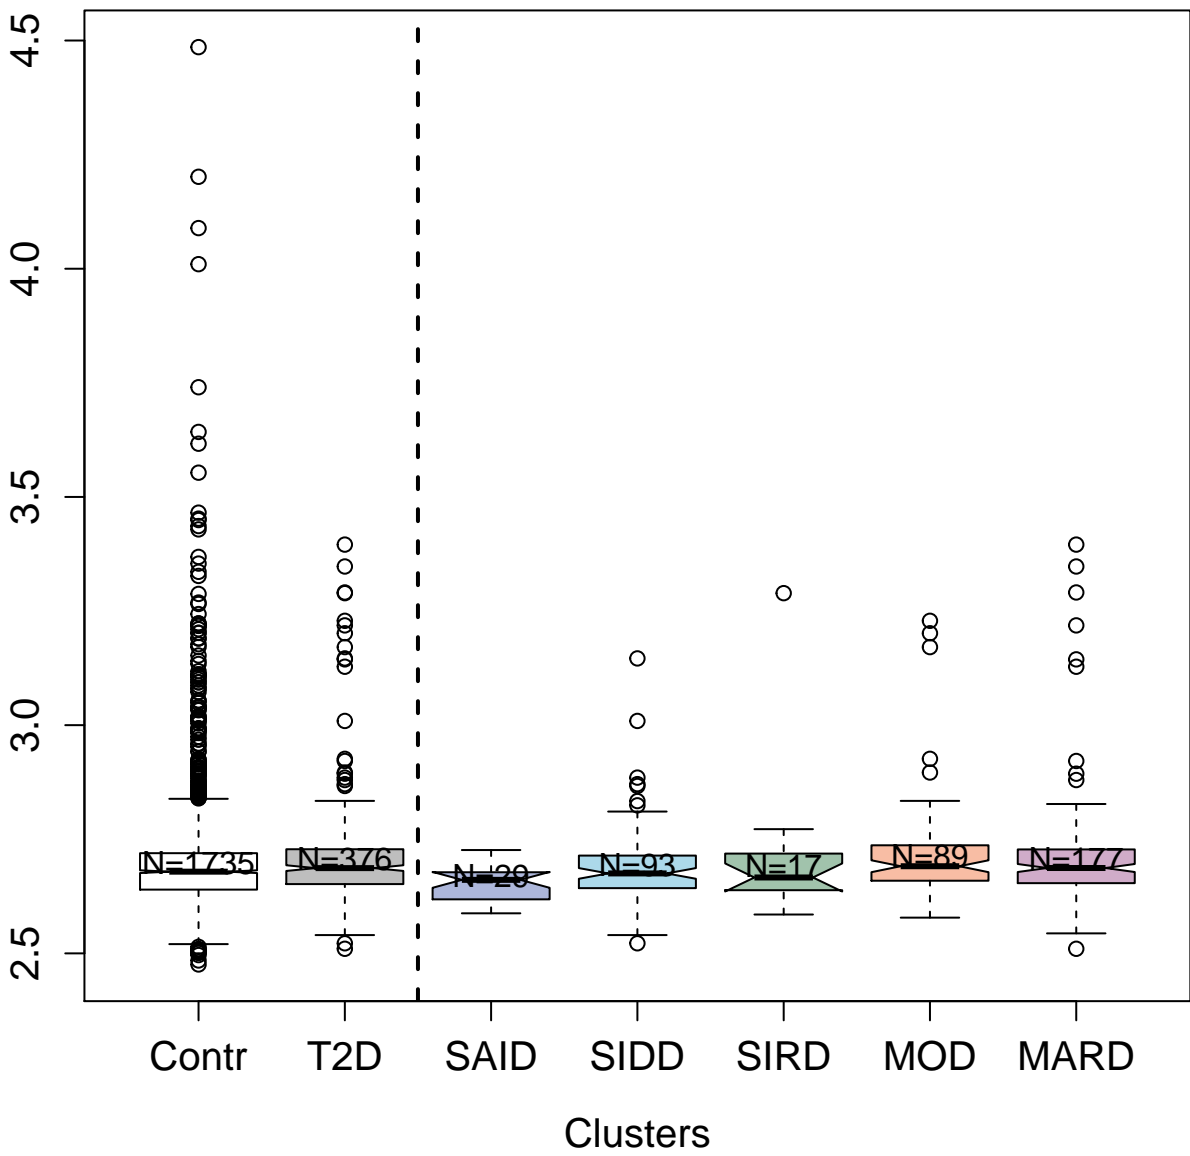

4137-57\_2 : Interleukin-25

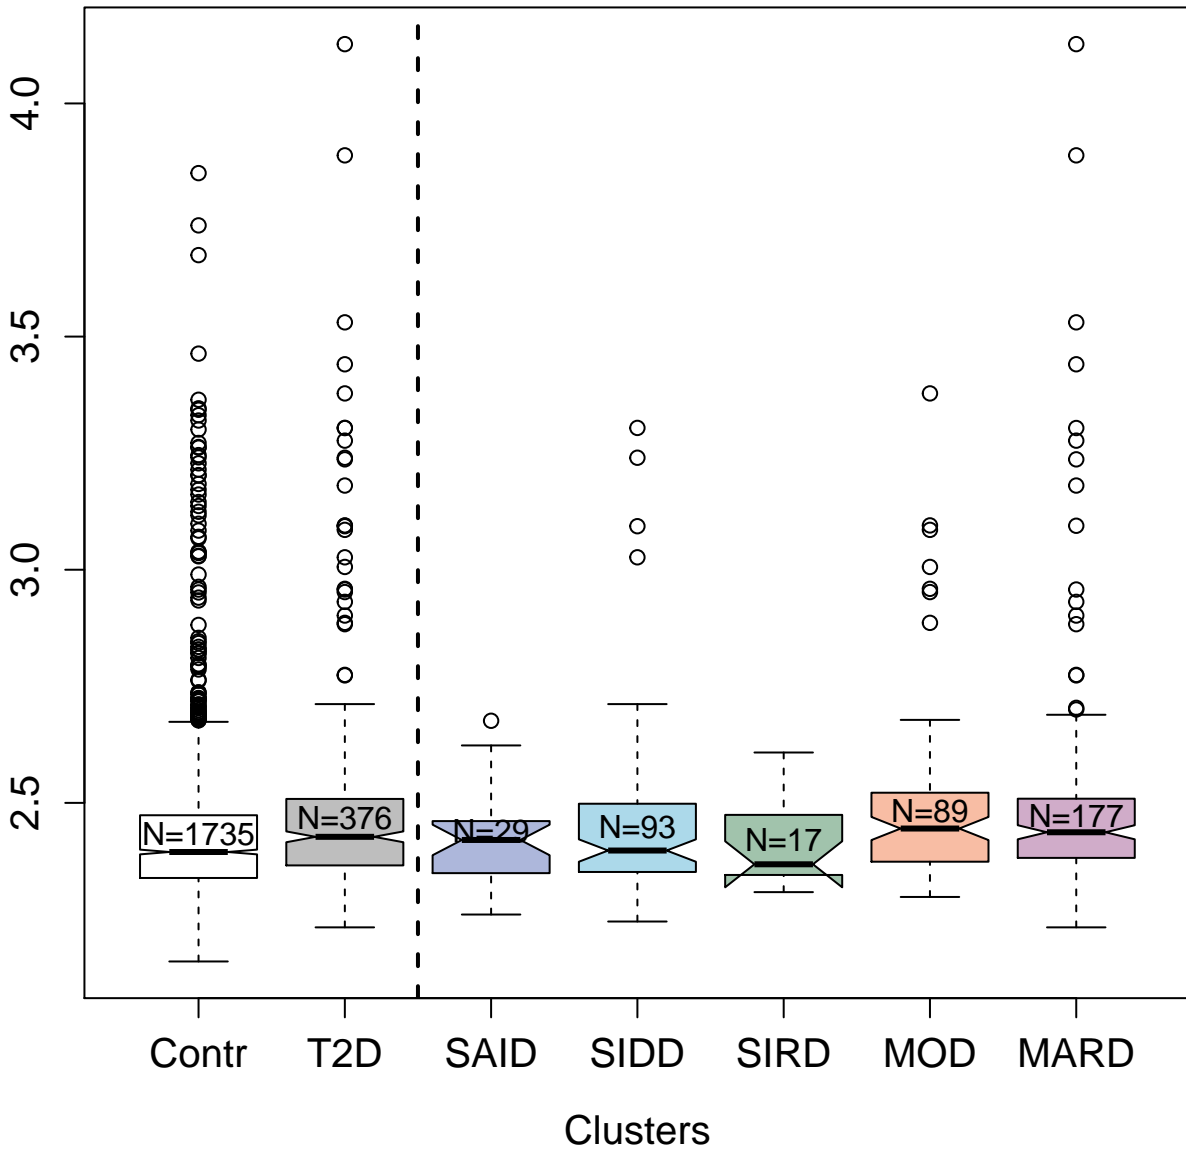

4842-62\_2 : Glypican-3

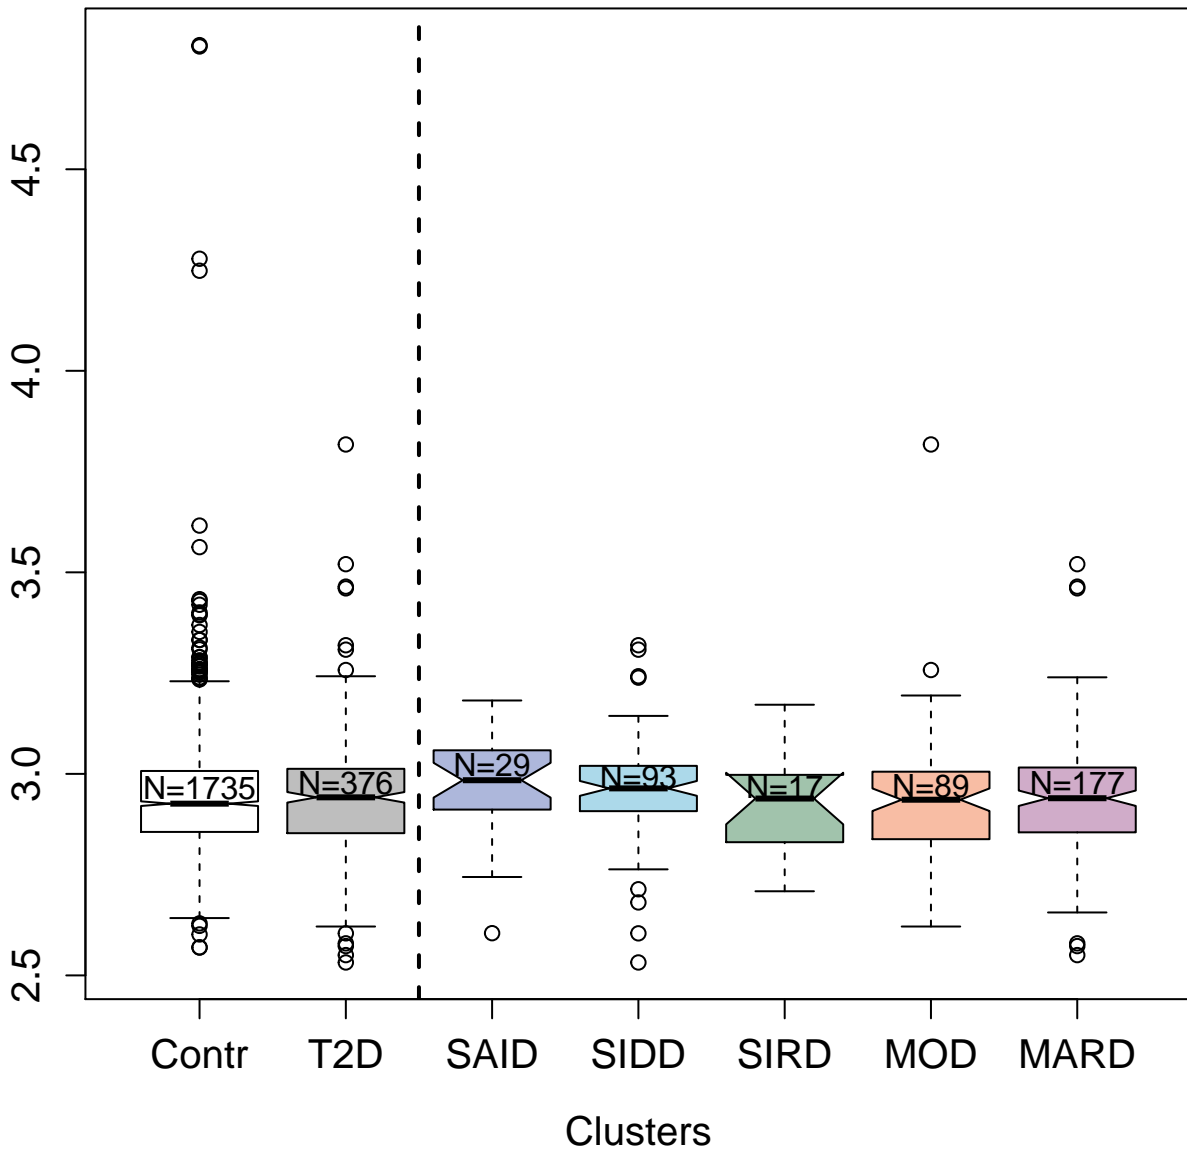

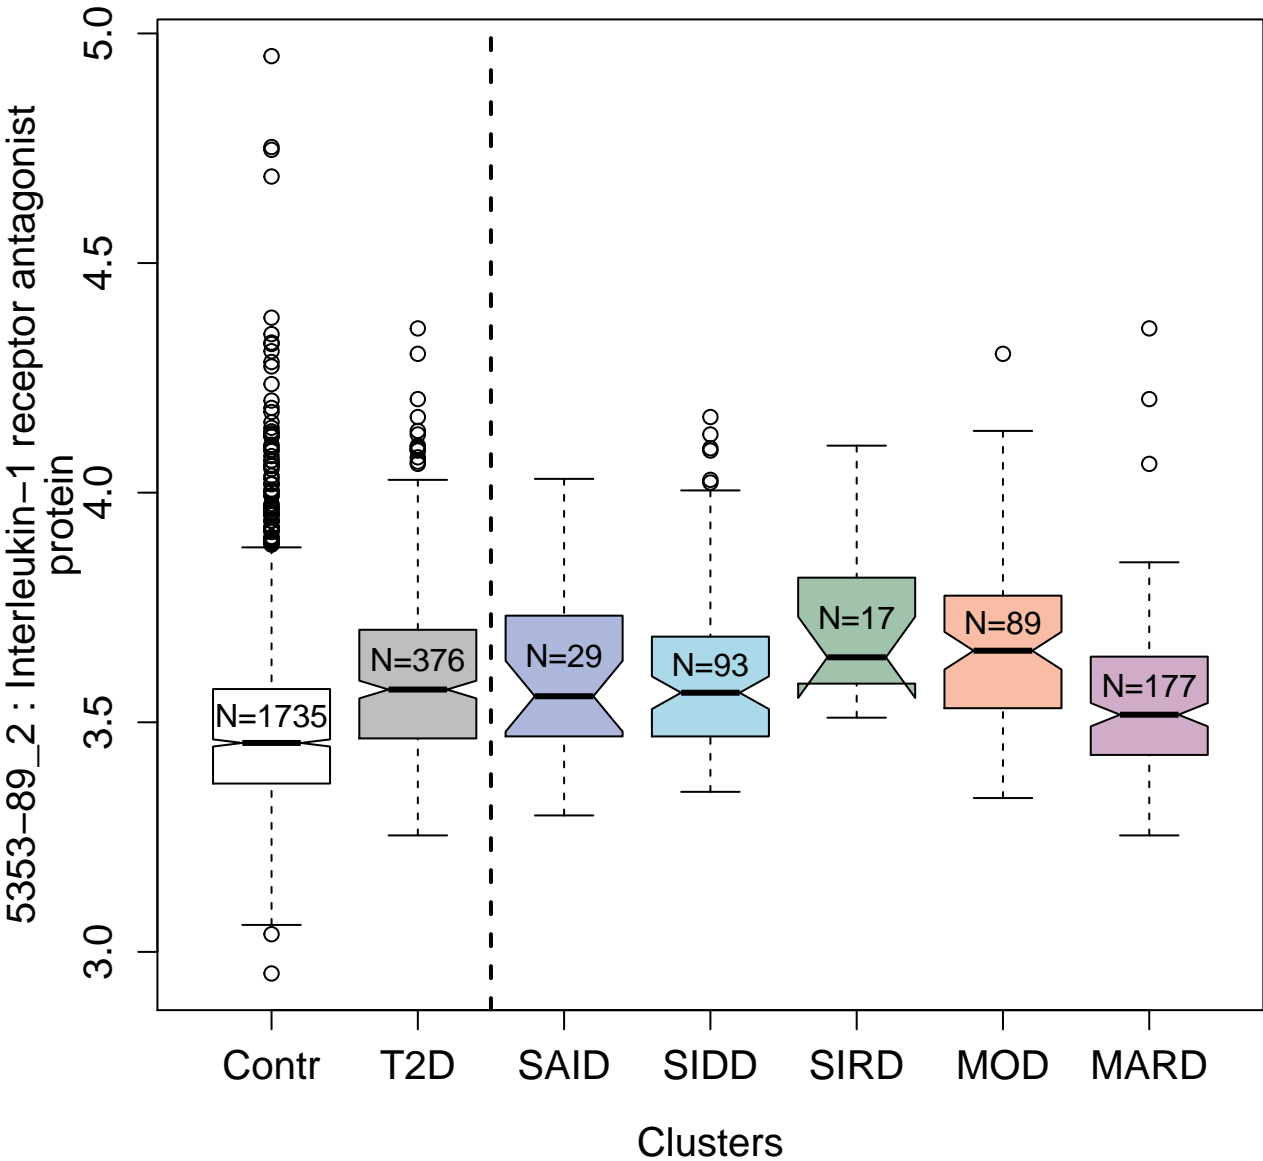

8468-19\_3 : Prostate-specific antigen

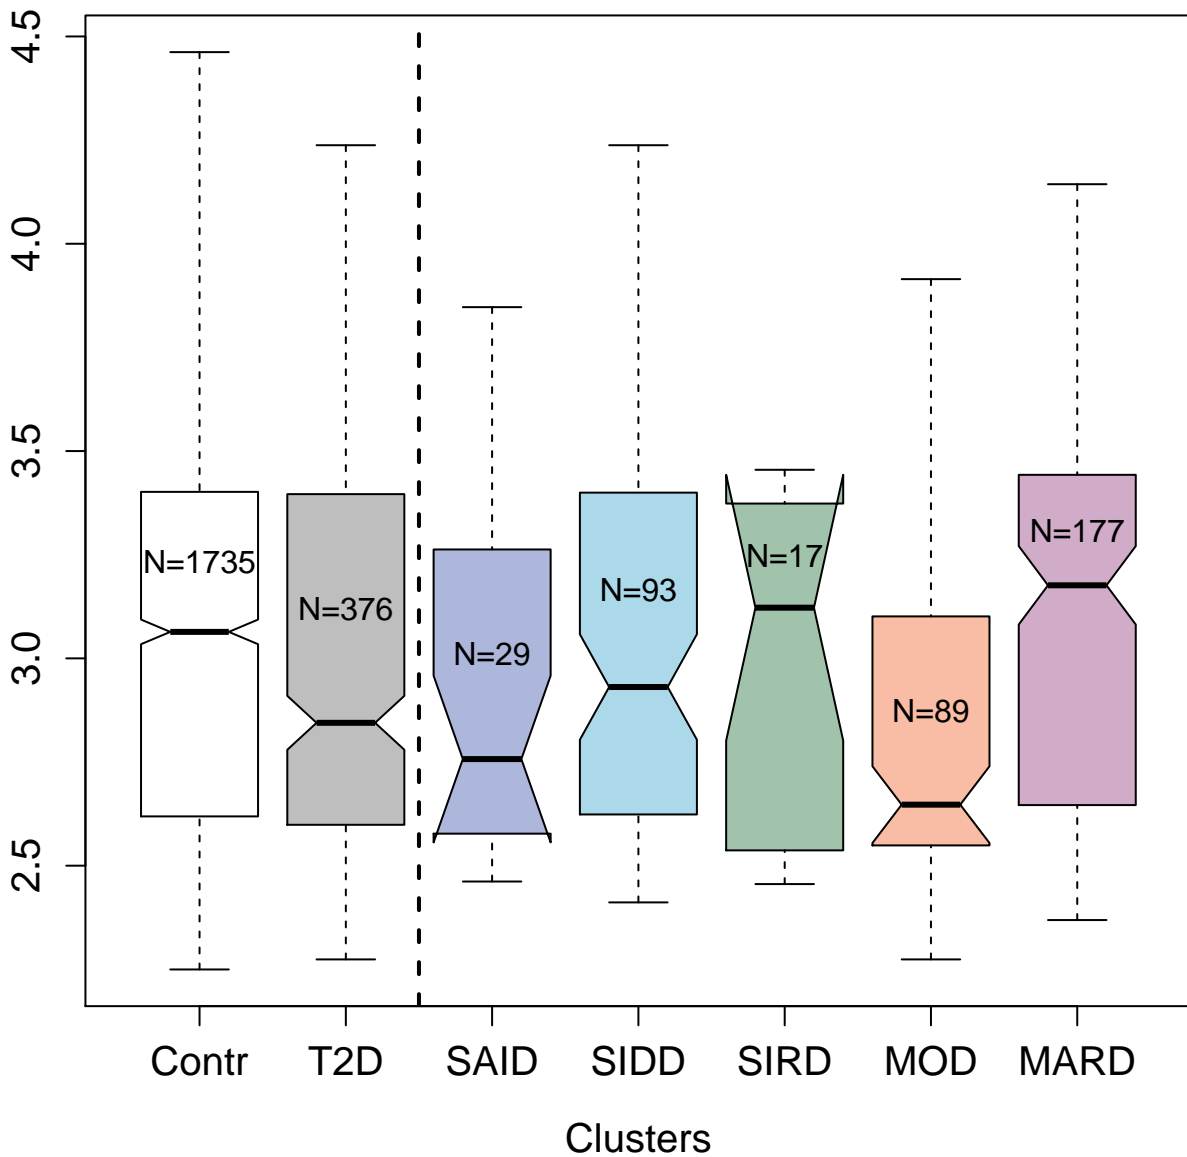

4712-28\_2 : Apolipoprotein D

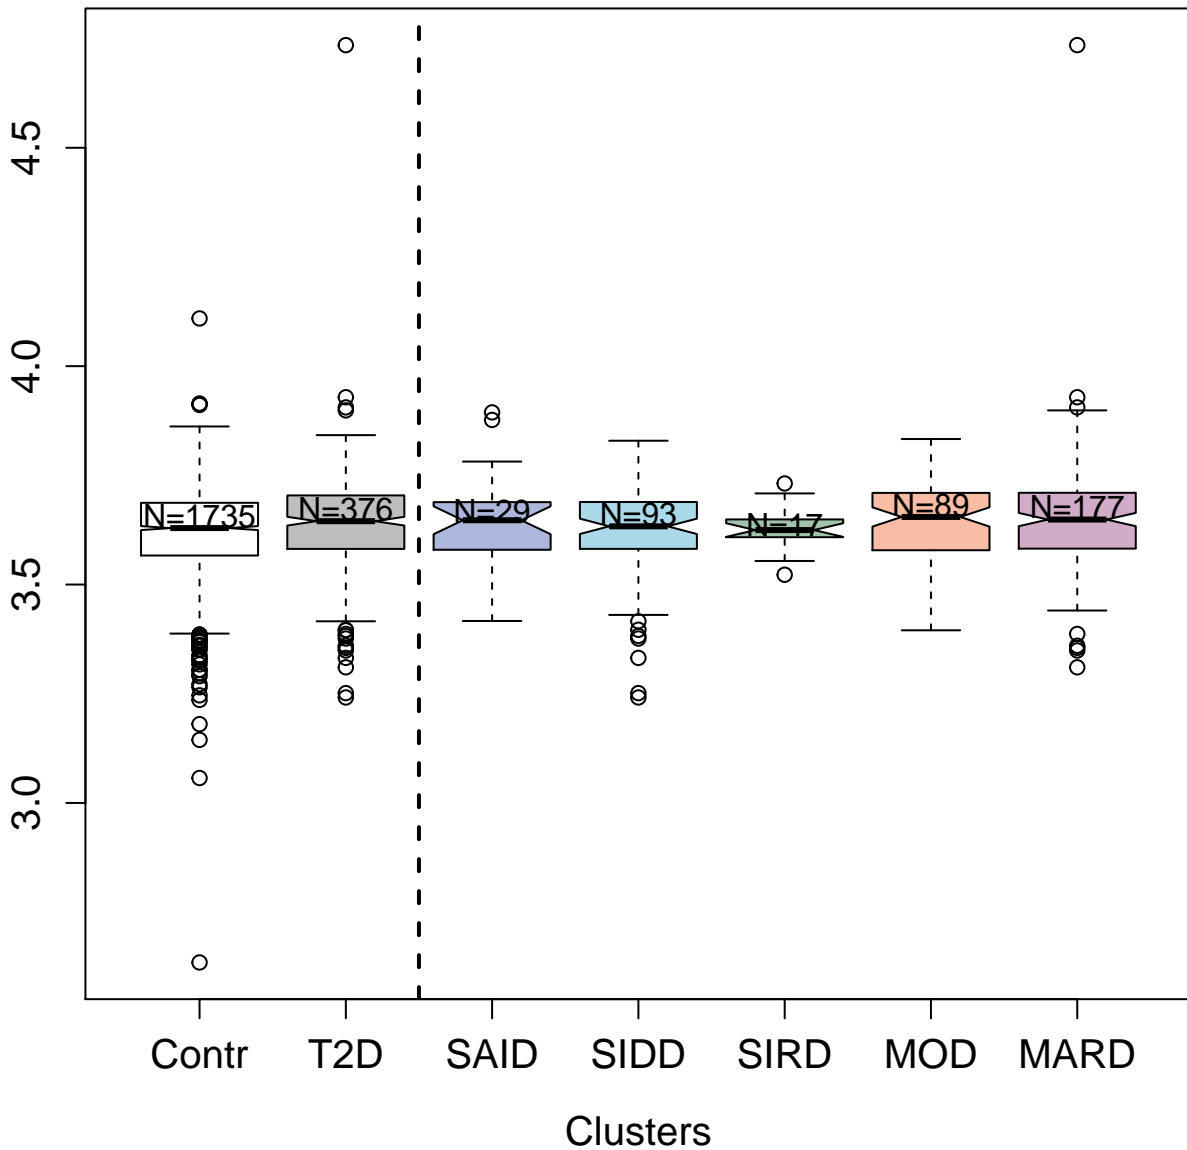



5307-12\_3 : Coagulation factor IXab

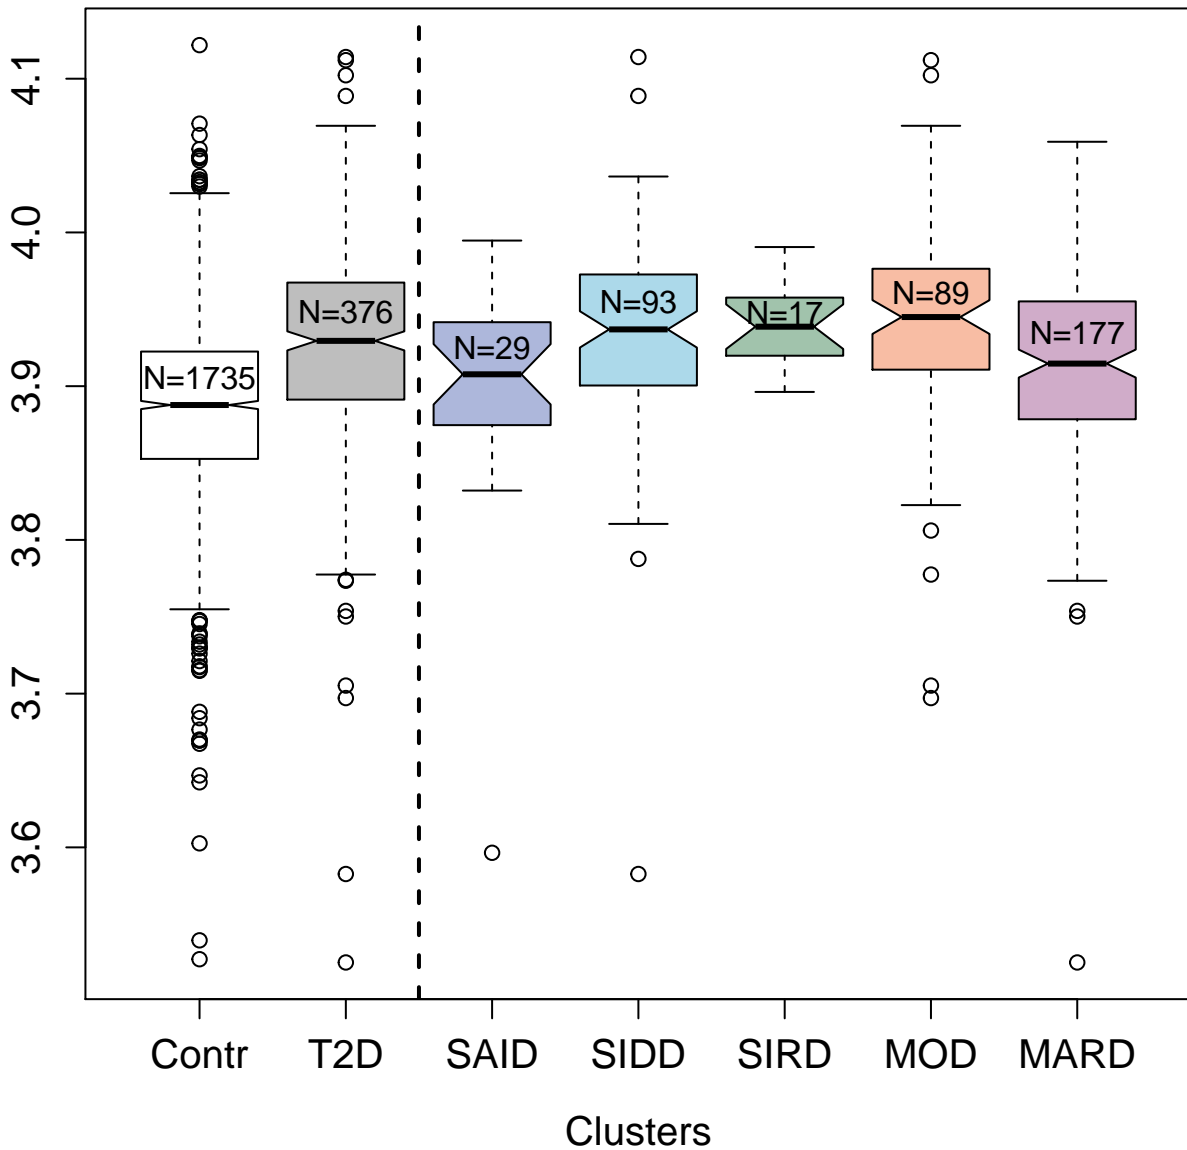

3074-6\_2 : Lipopolysaccharide-binding protein

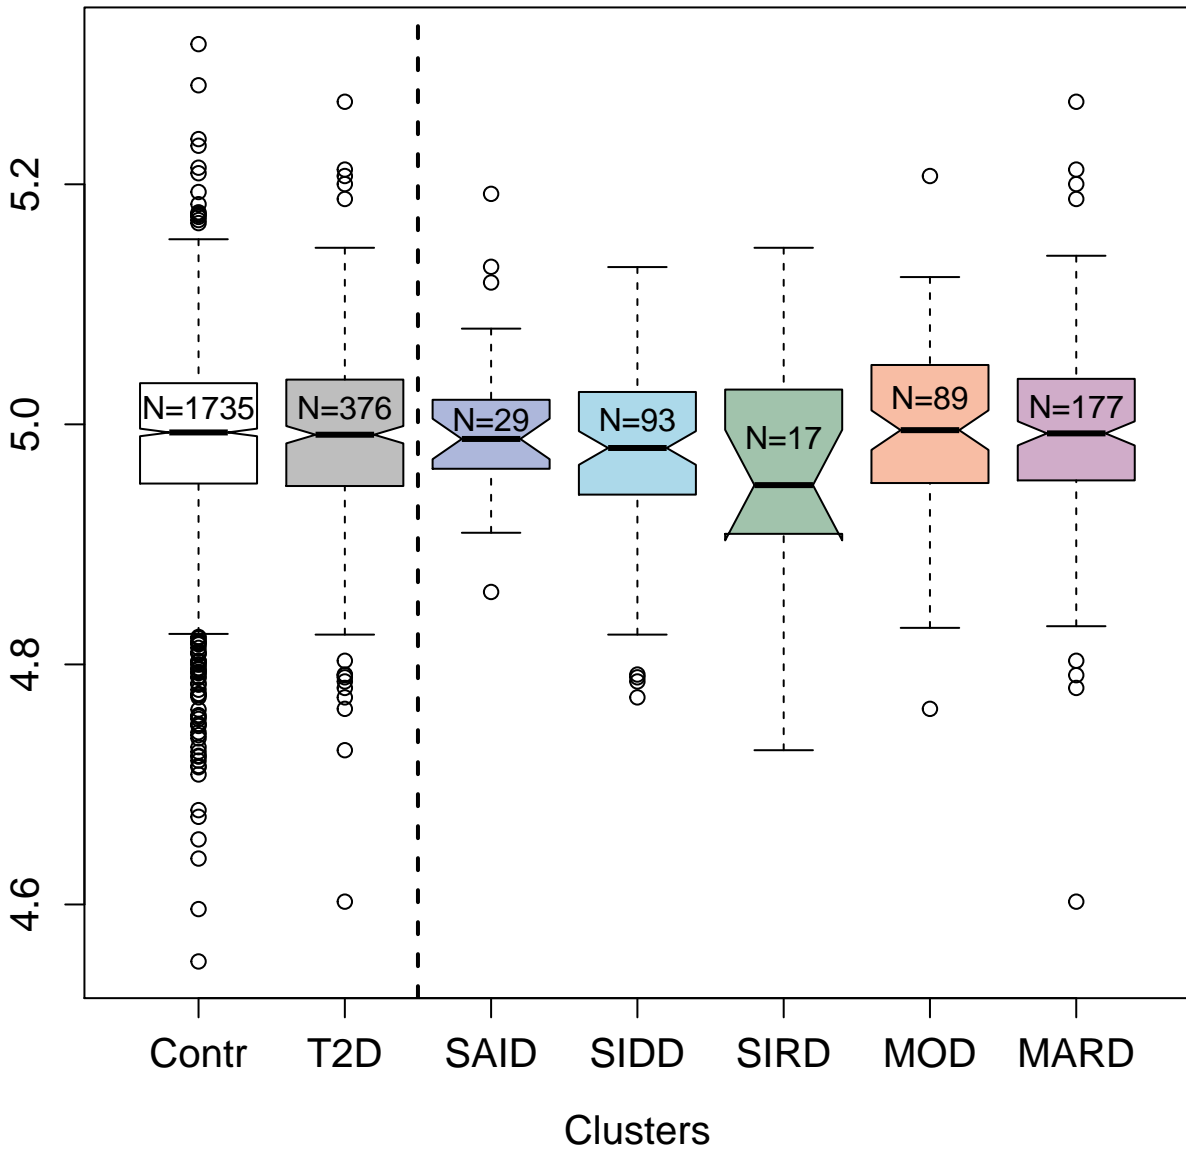

5834-18\_3 : Interleukin-9

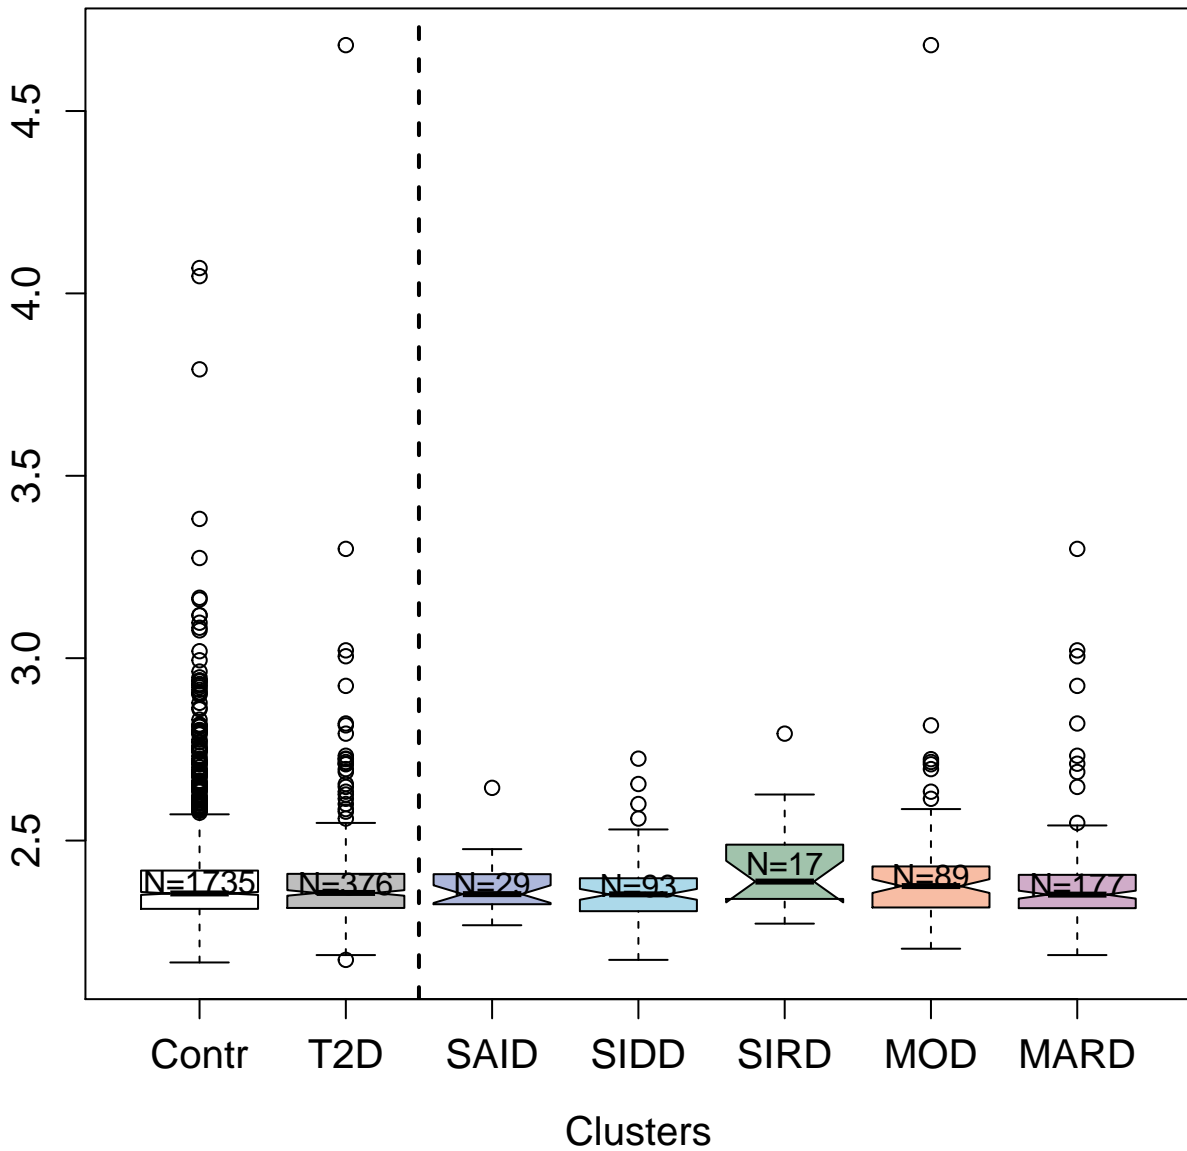

3623-84\_4 : Lymphocyte antigen 86

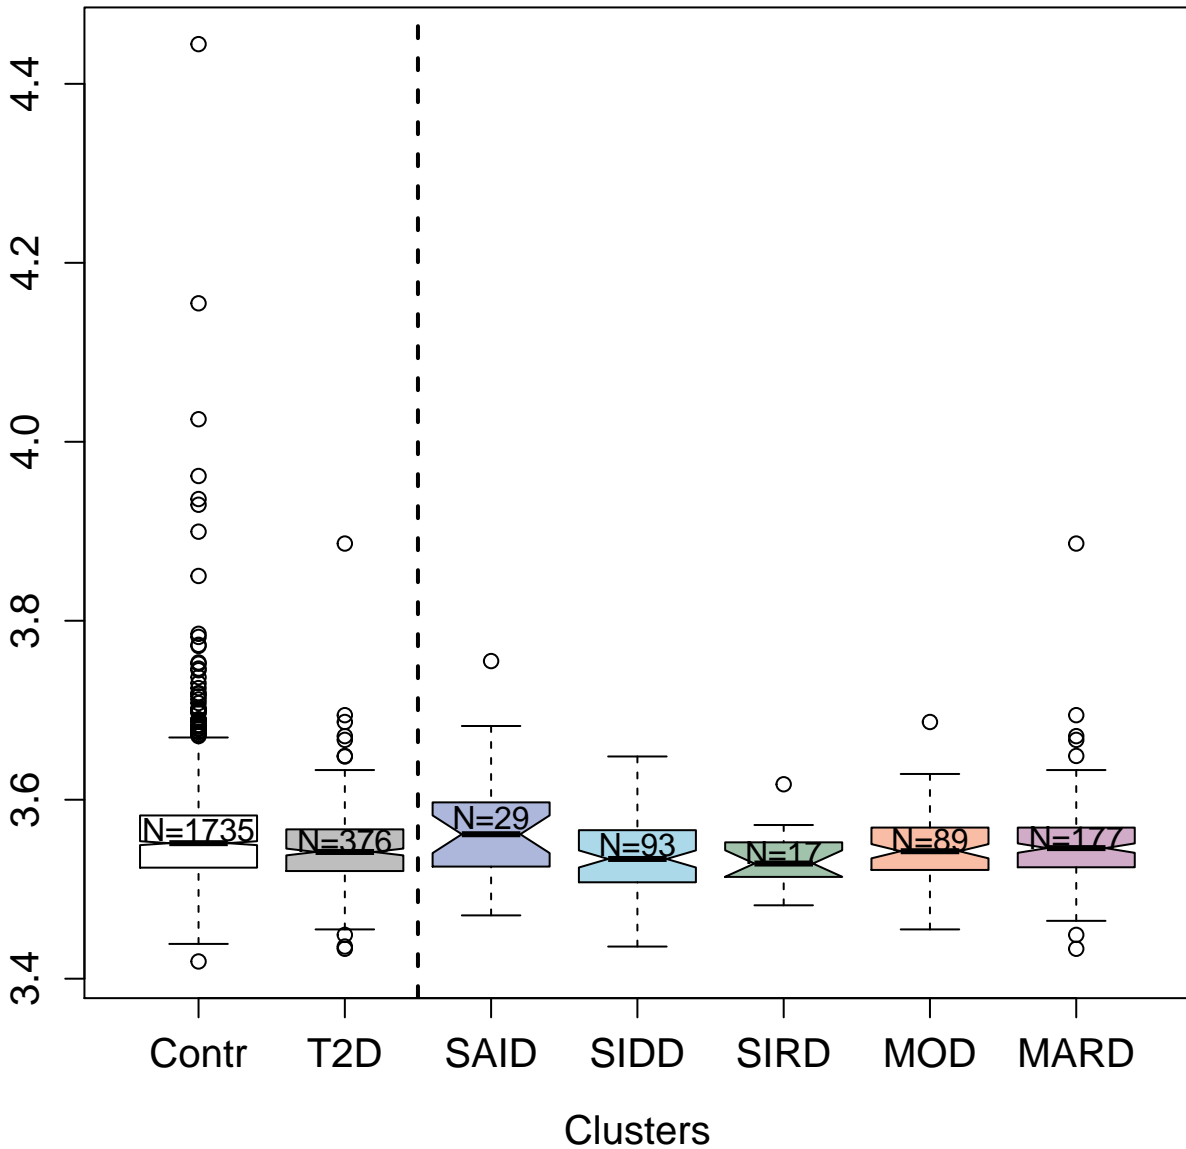

5280-68\_5 : Mitochondrial glutamate carrier 2

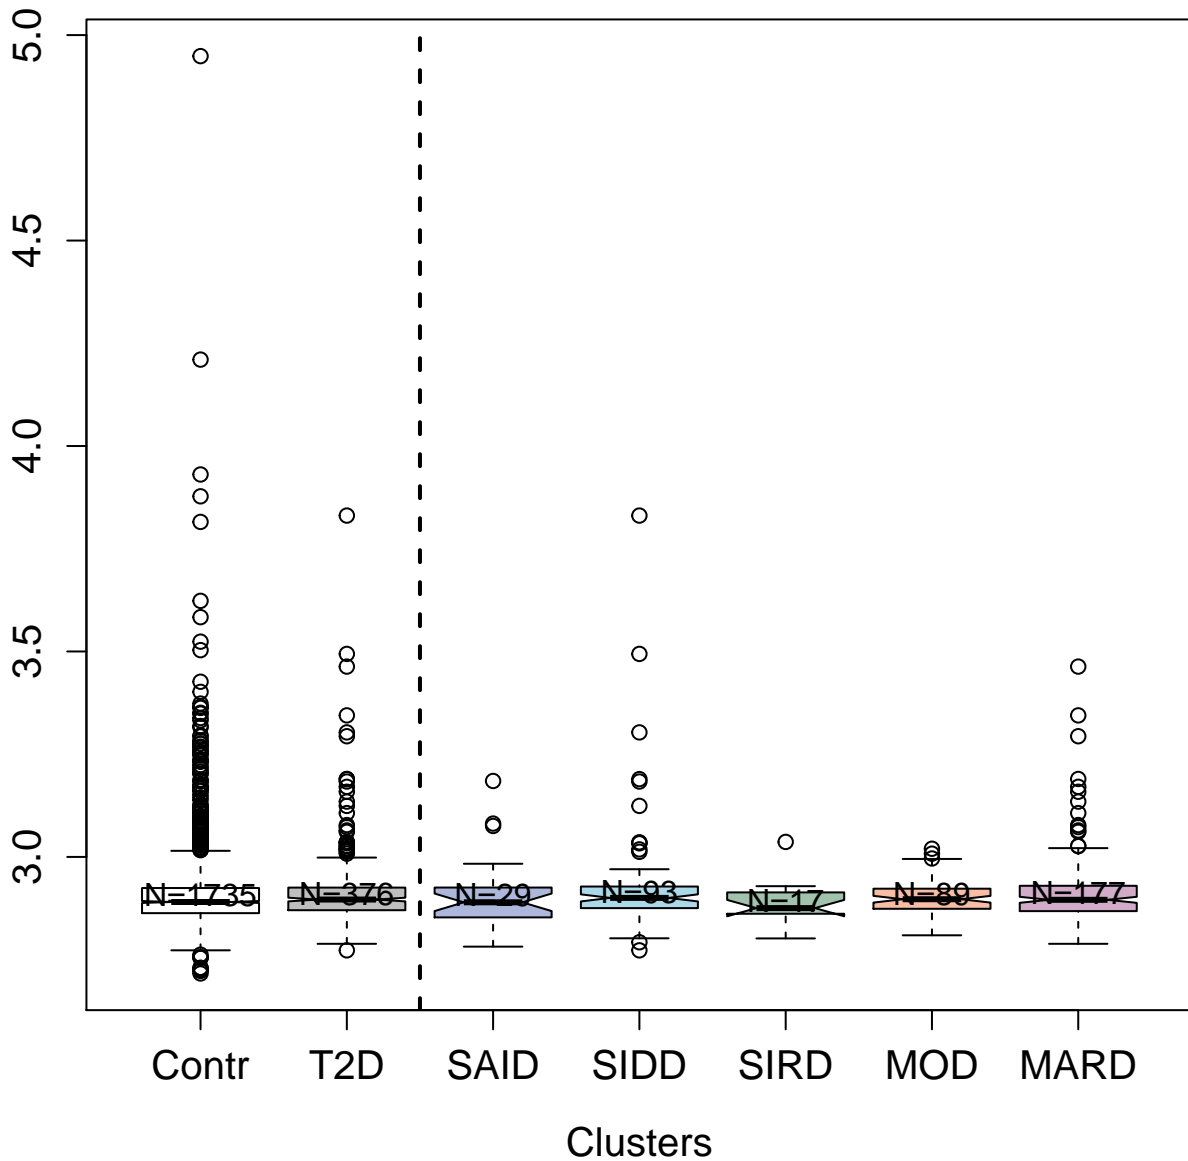

9185-15\_3 : Trefoil factor 1

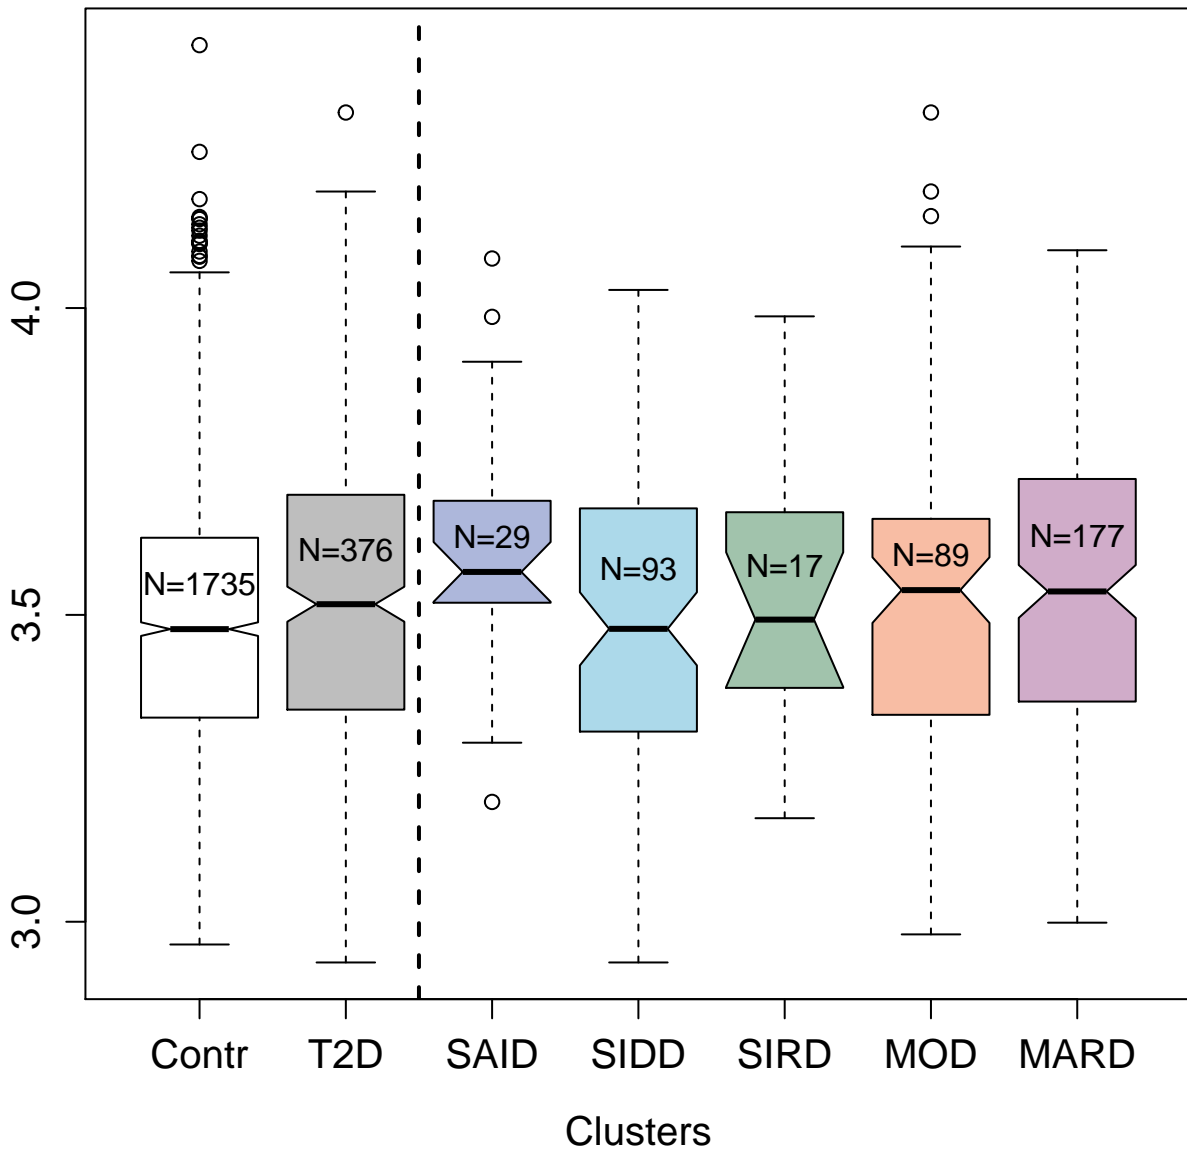

3356-50\_1 : Carbonic anhydrase 7

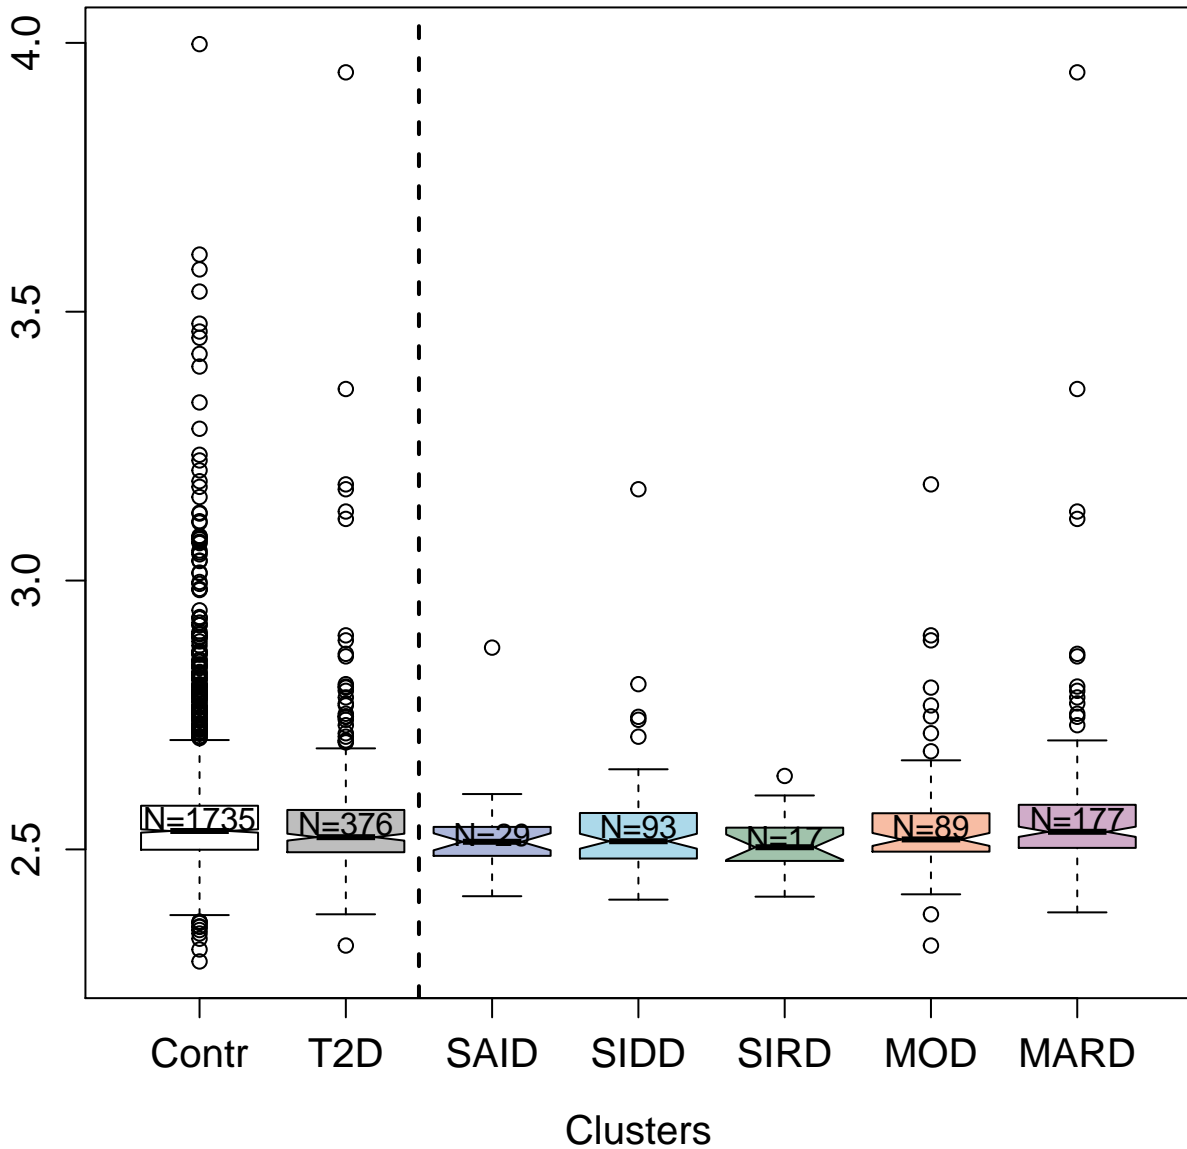

2524-56\_3 : High mobility group protein B1

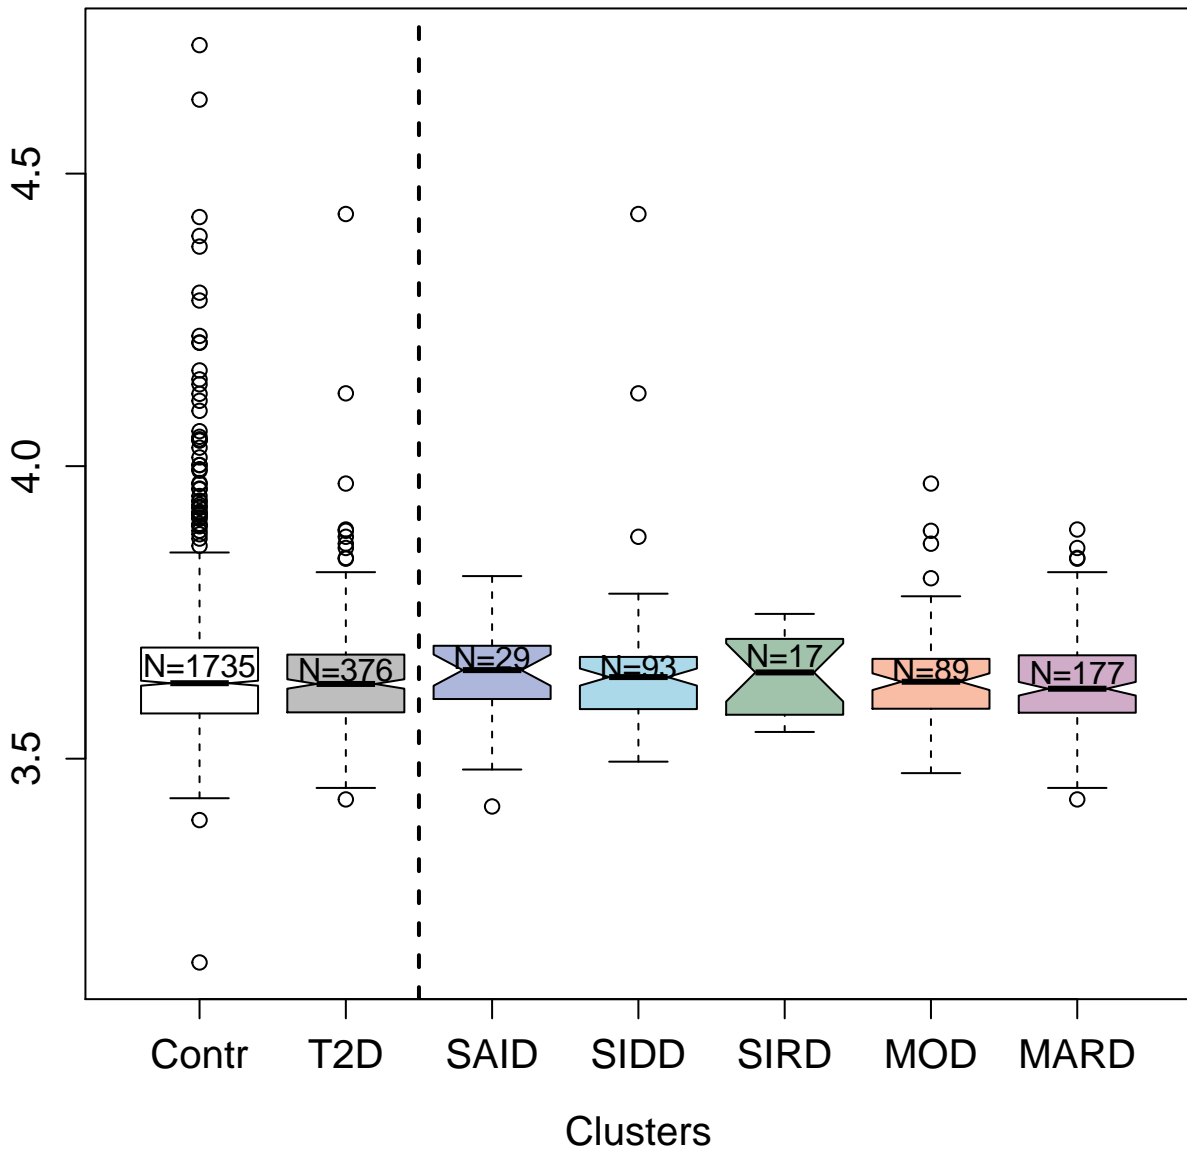



2860-19\_2 : Importin subunit alpha-1

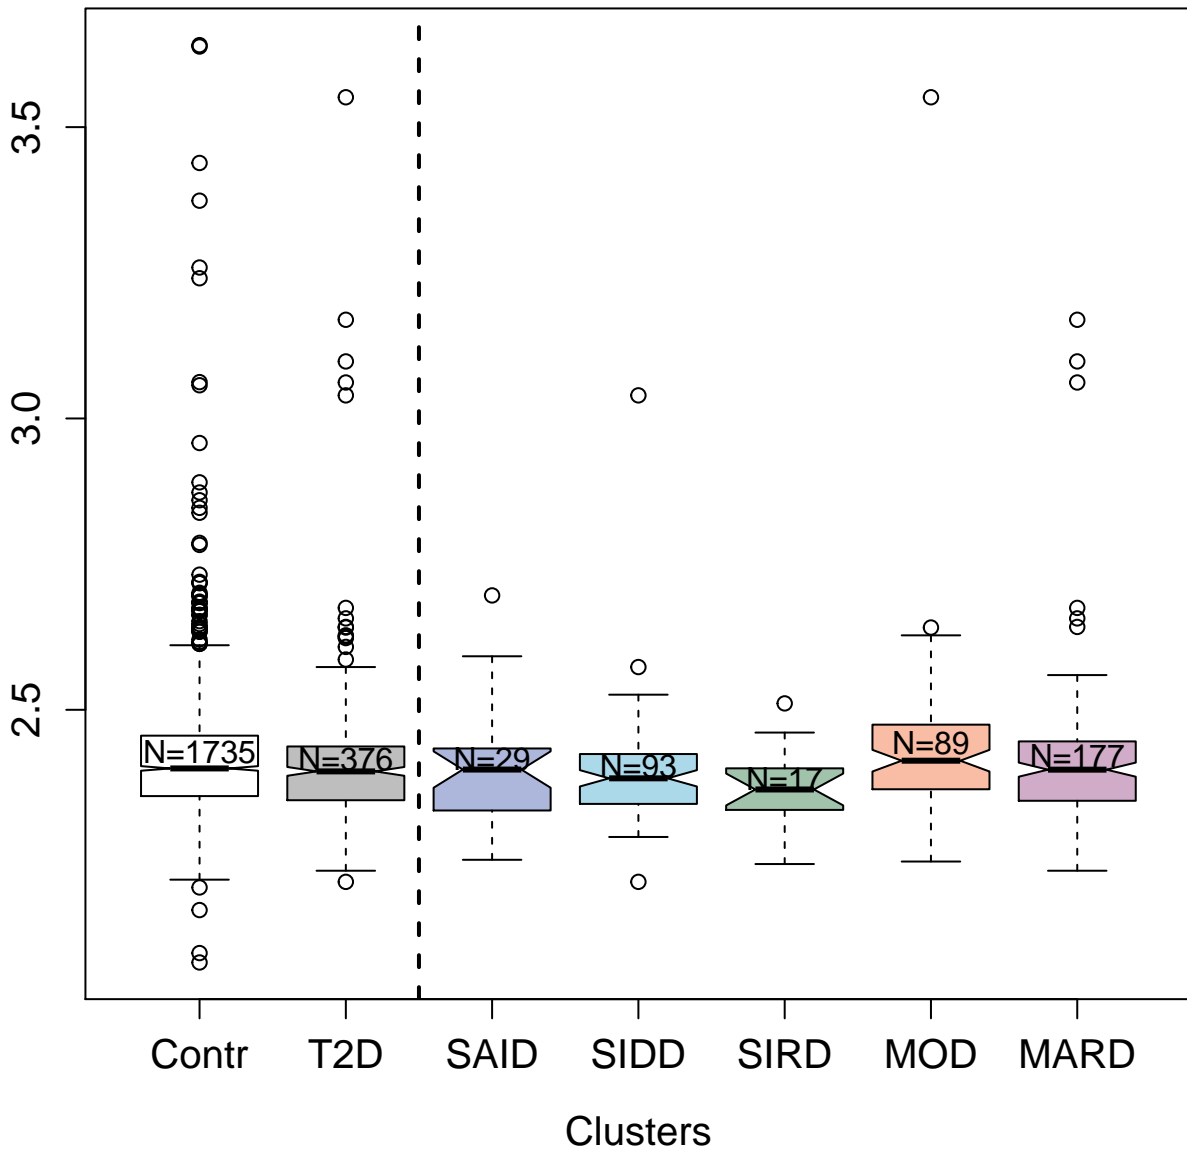

5268-49\_3 : Matrix metalloproteinase-16

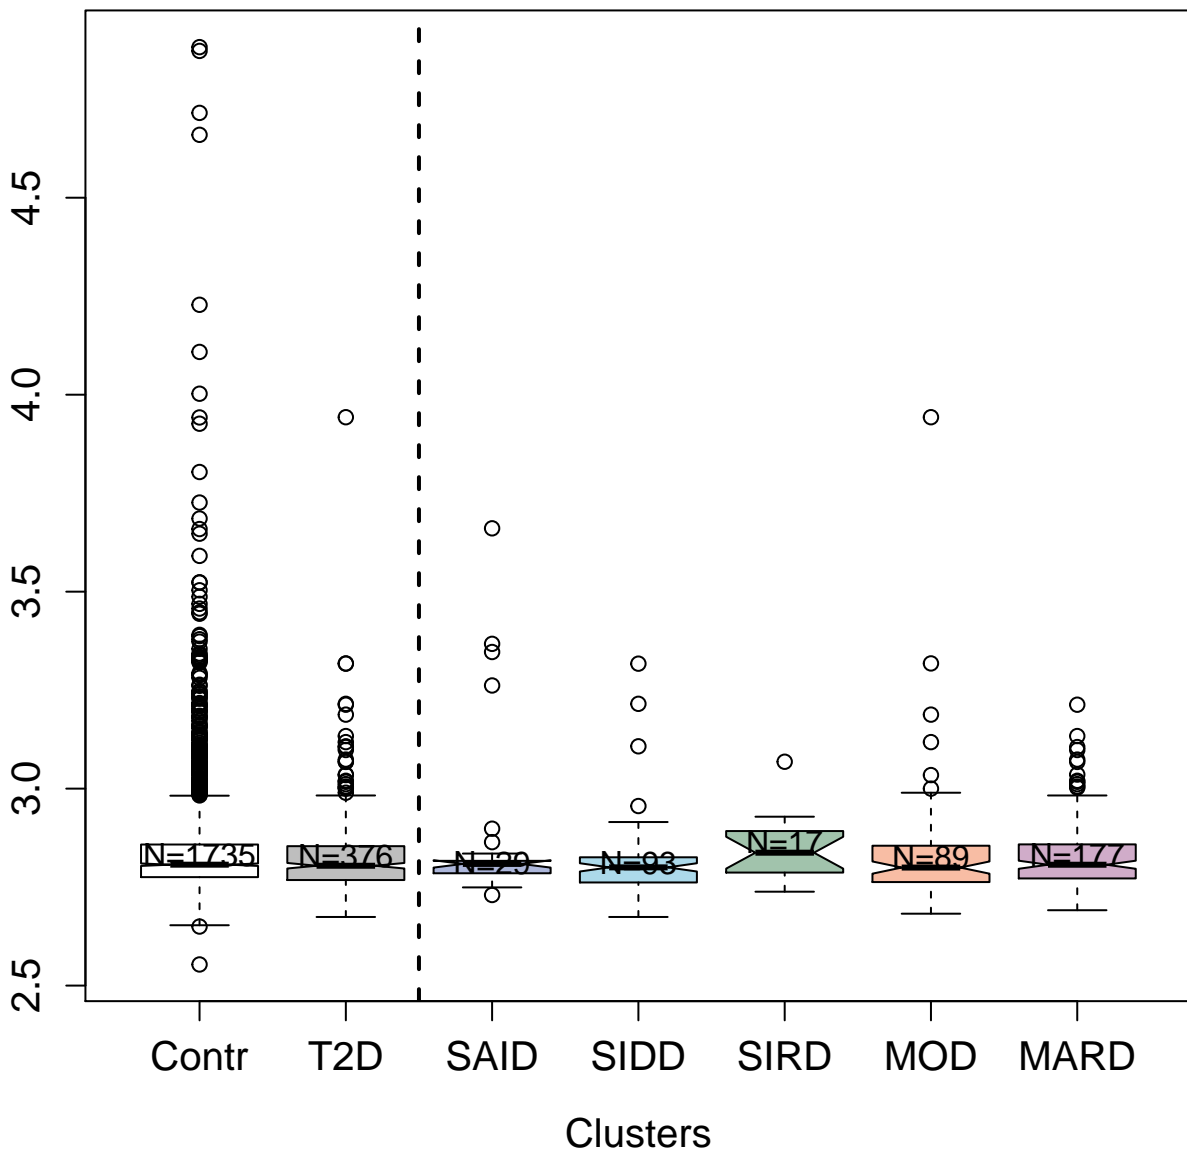

3709-4\_2 : Alanine aminotransferase 1

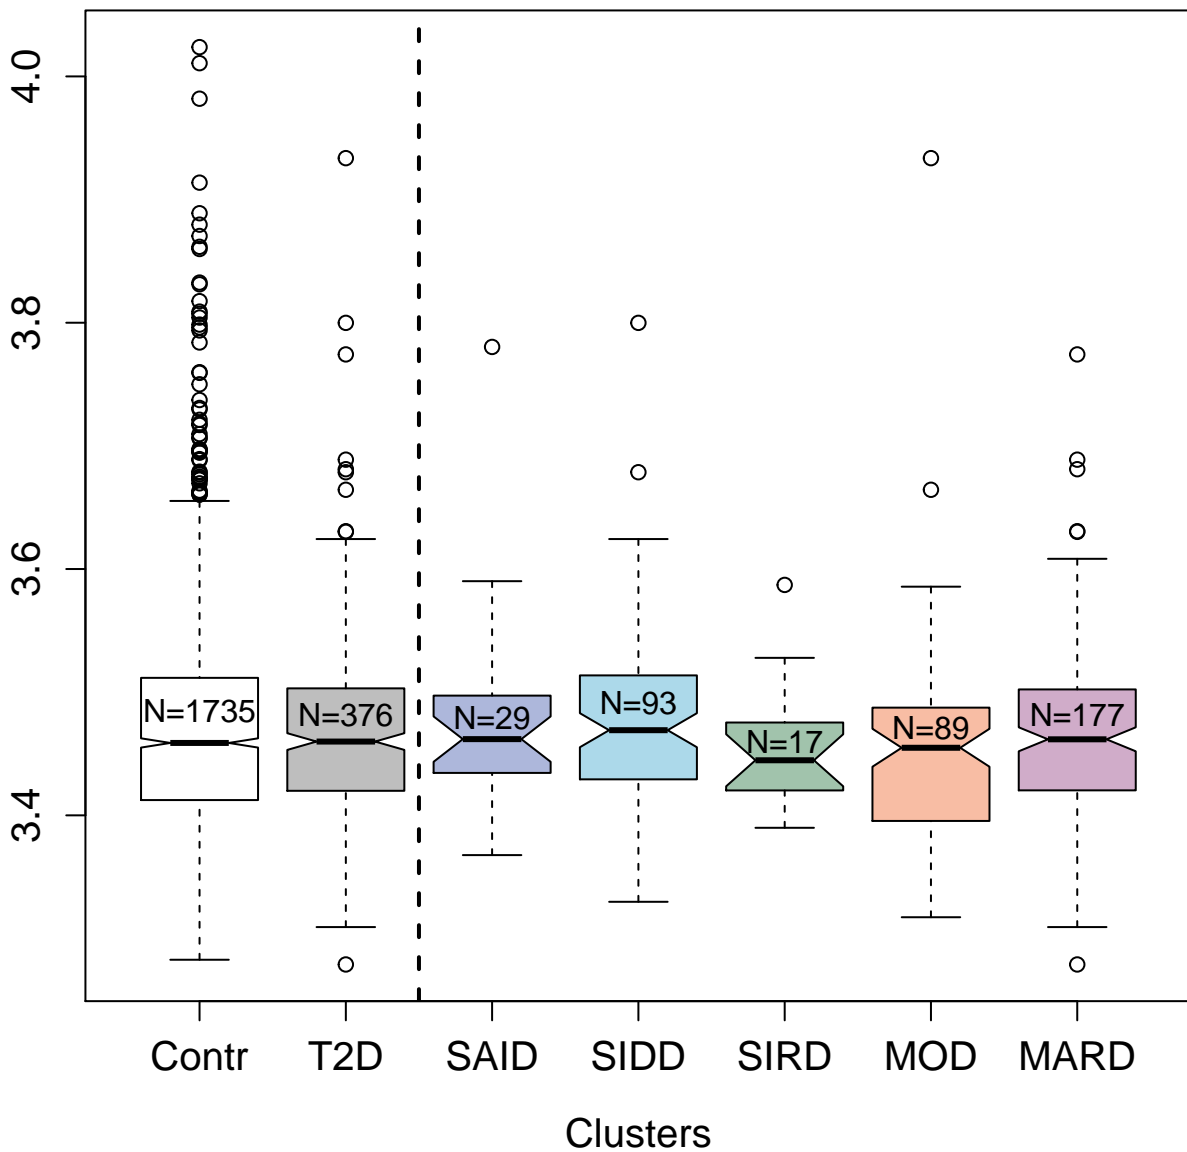

8447-11\_3 : Appetite-regulating hormone

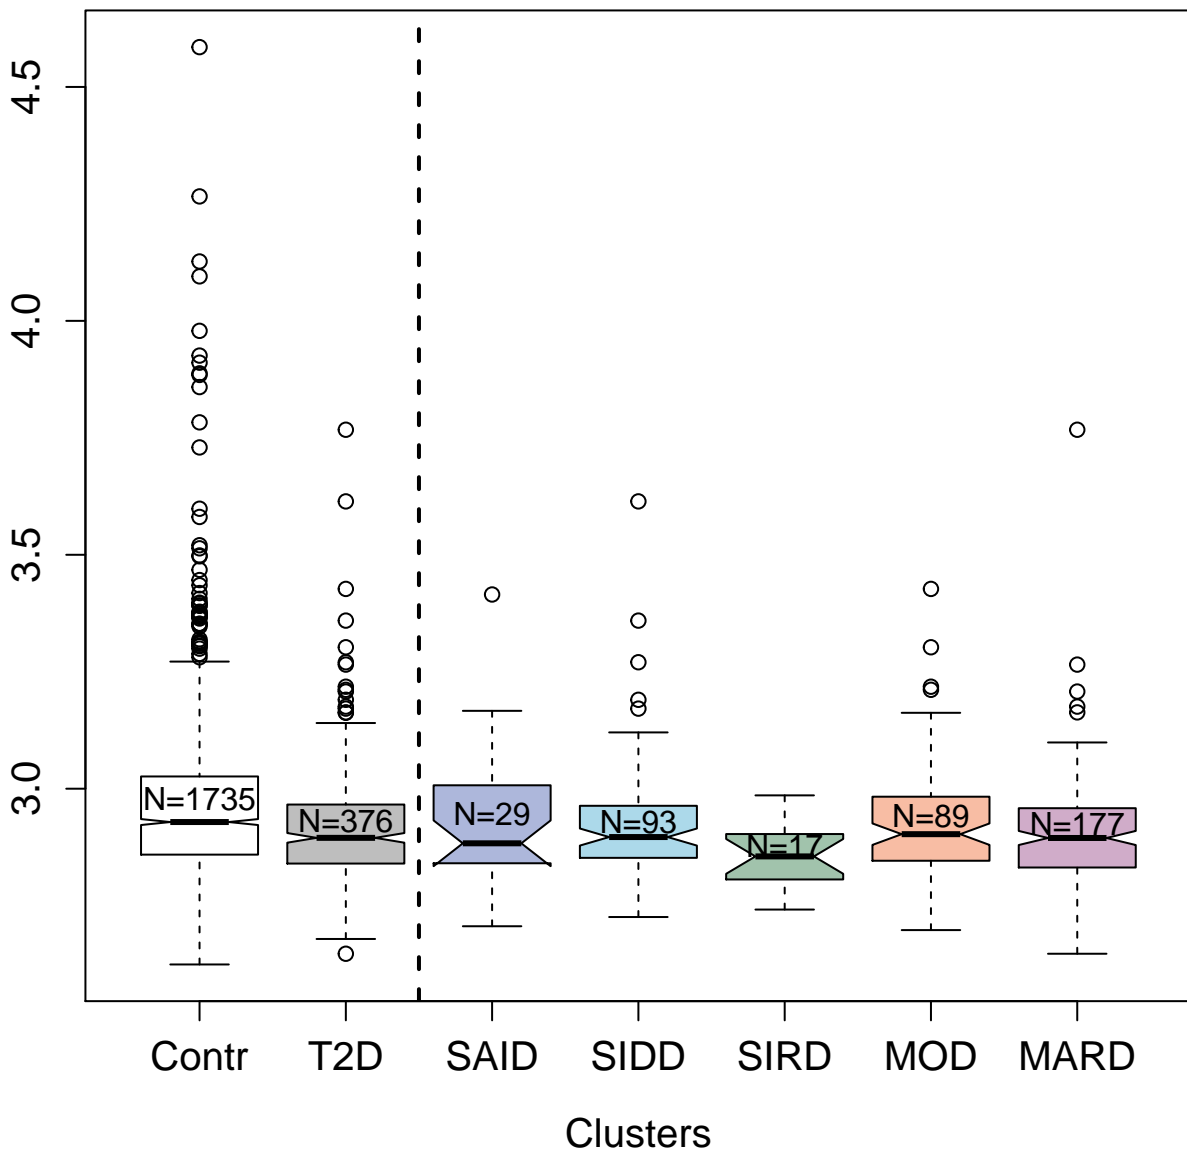

5462-62\_3 : Ficollin-3

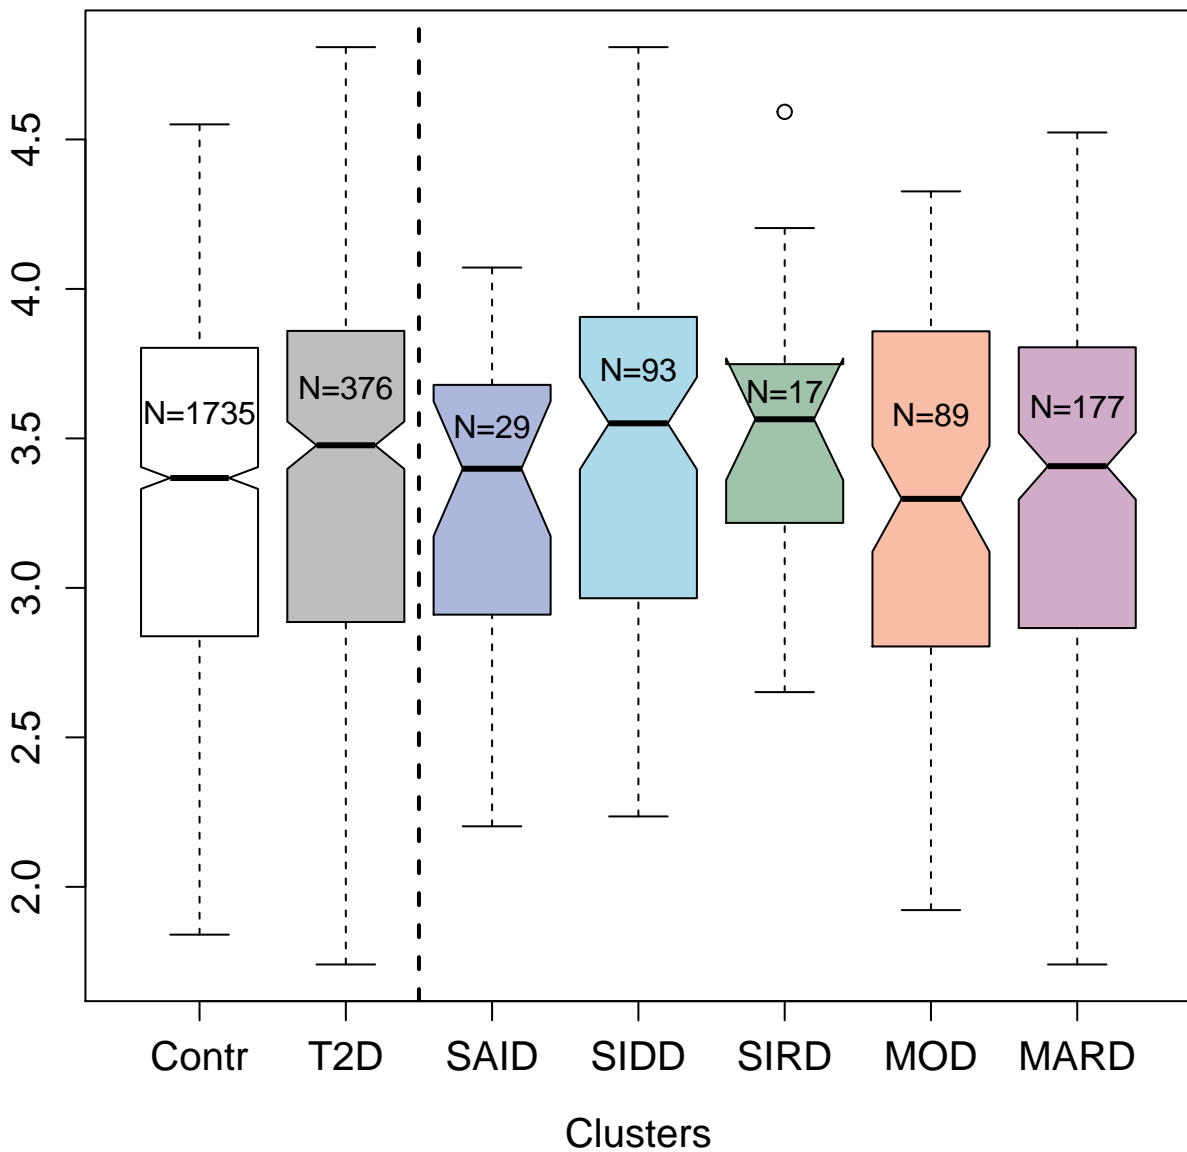

3394-81\_2 : Serine/threonine-protein kinase PLK1

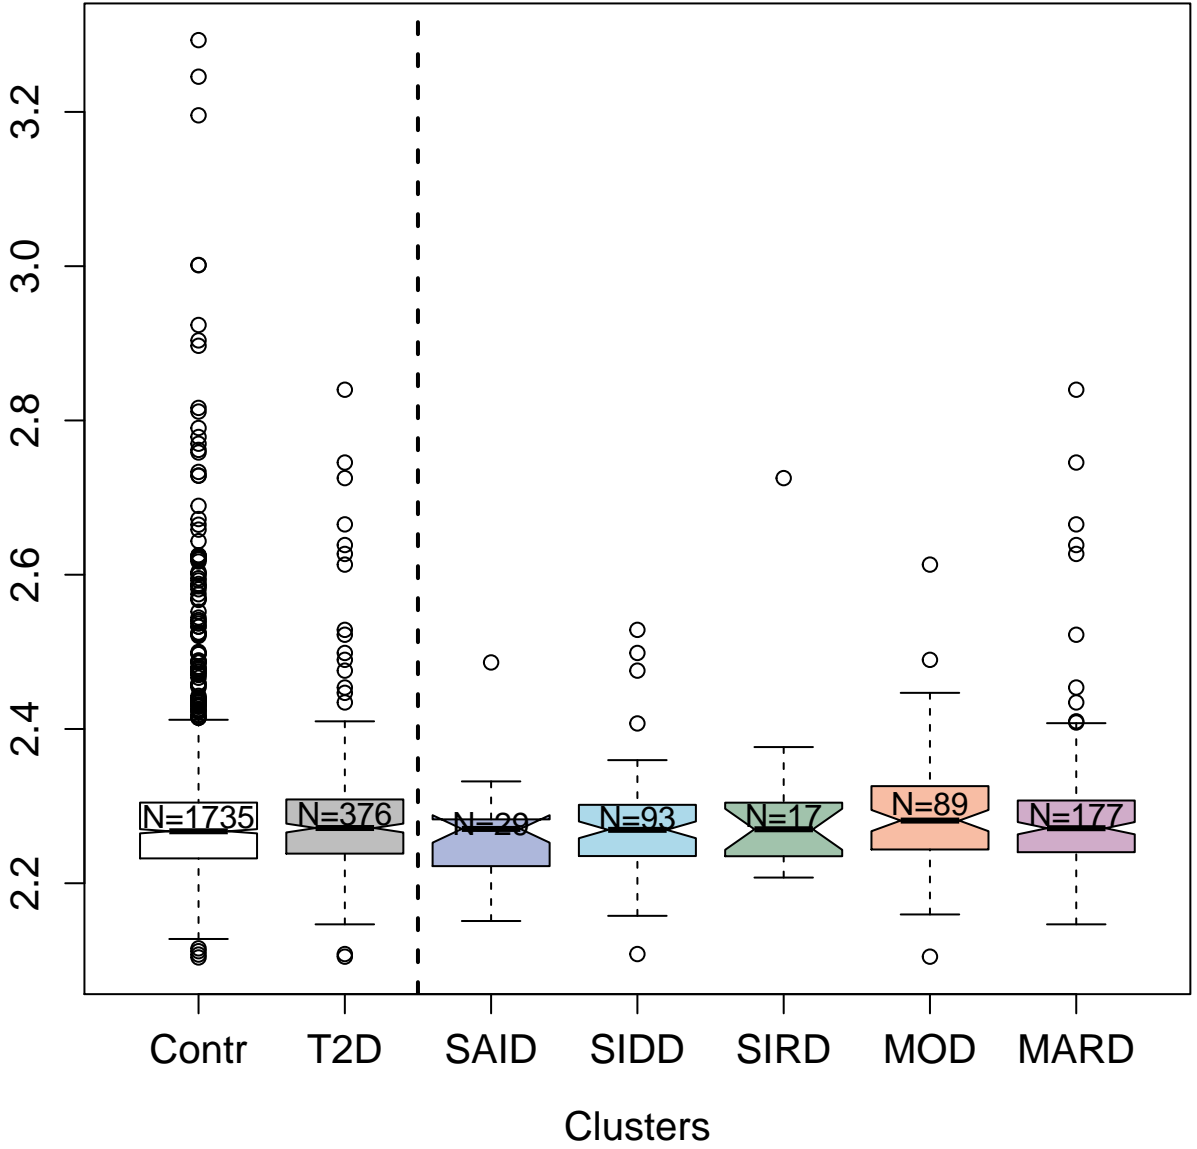

9172-69\_3 : Neutrophil collagenase

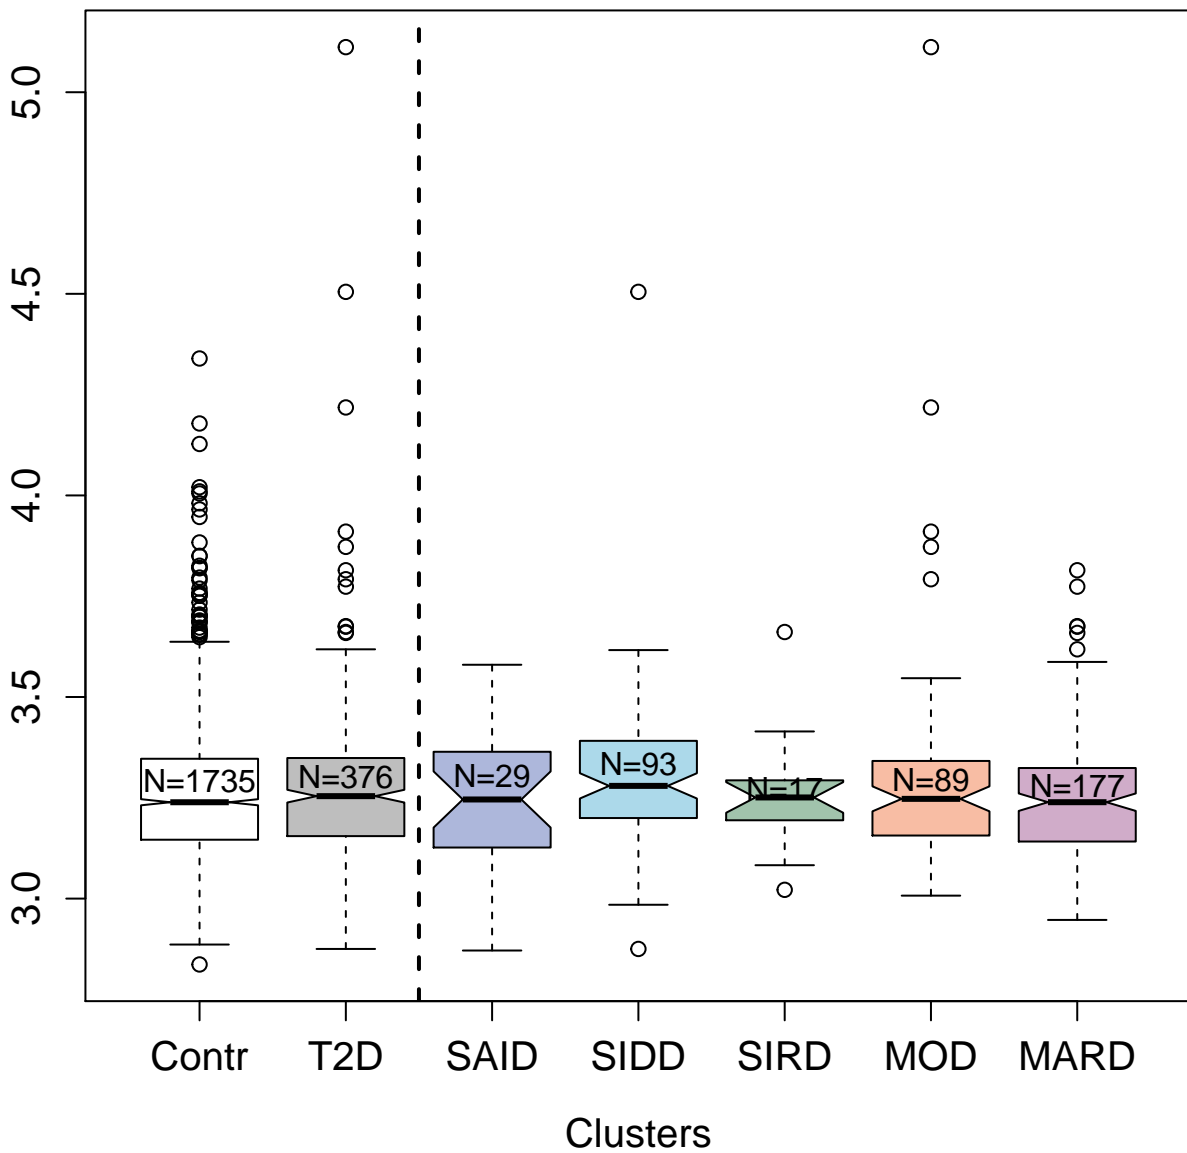

3616-3\_5 : N-acetylglucosamine-6-sulfatase

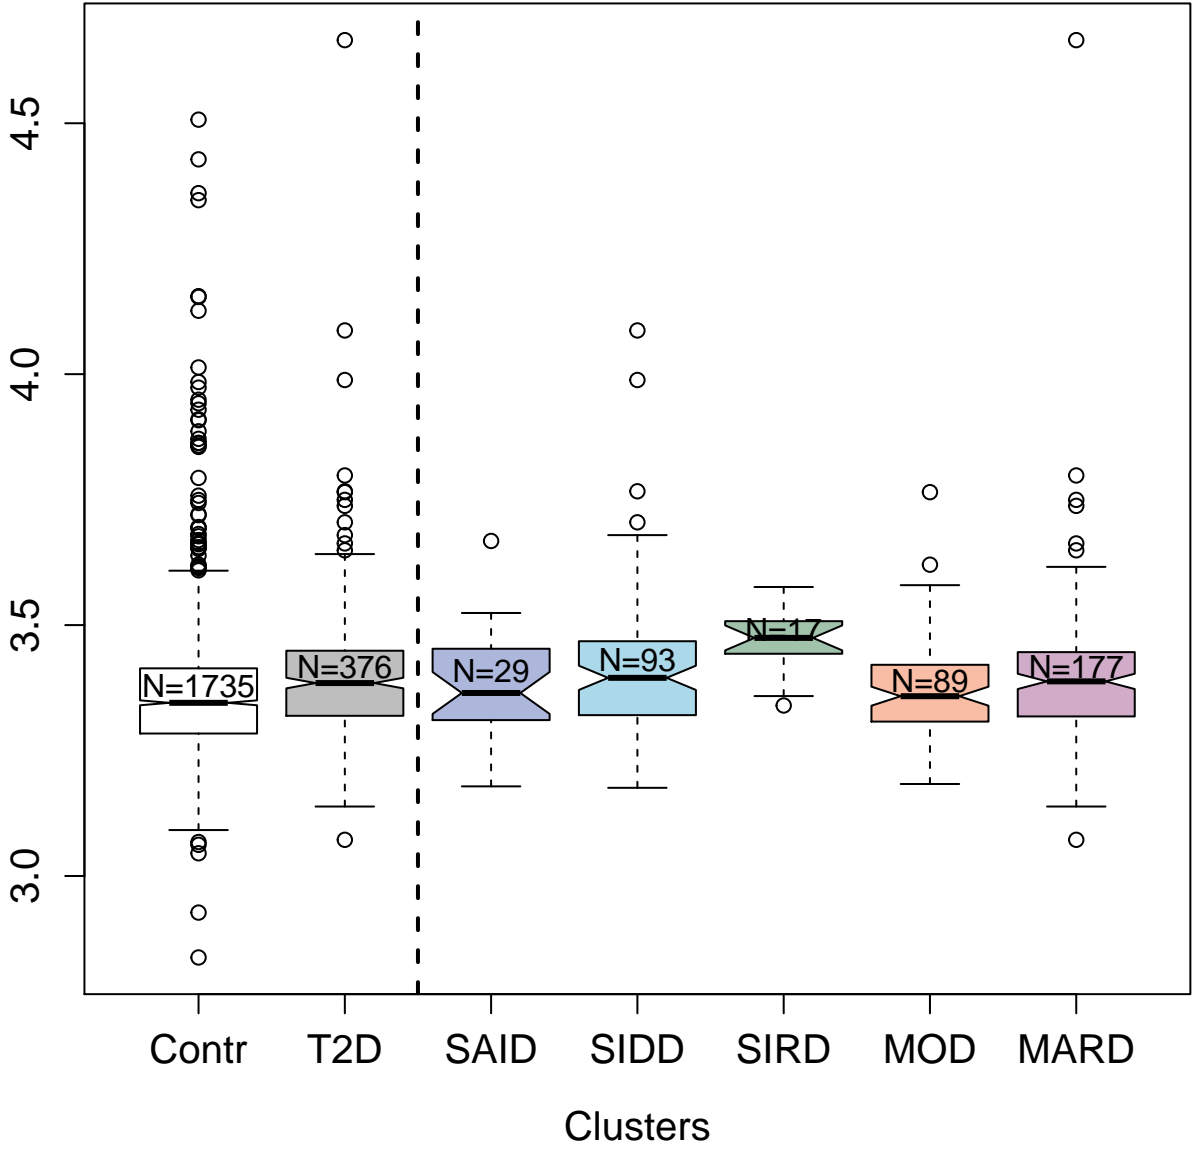



3845-51\_2 : Dynein light chain roadblock-type 1

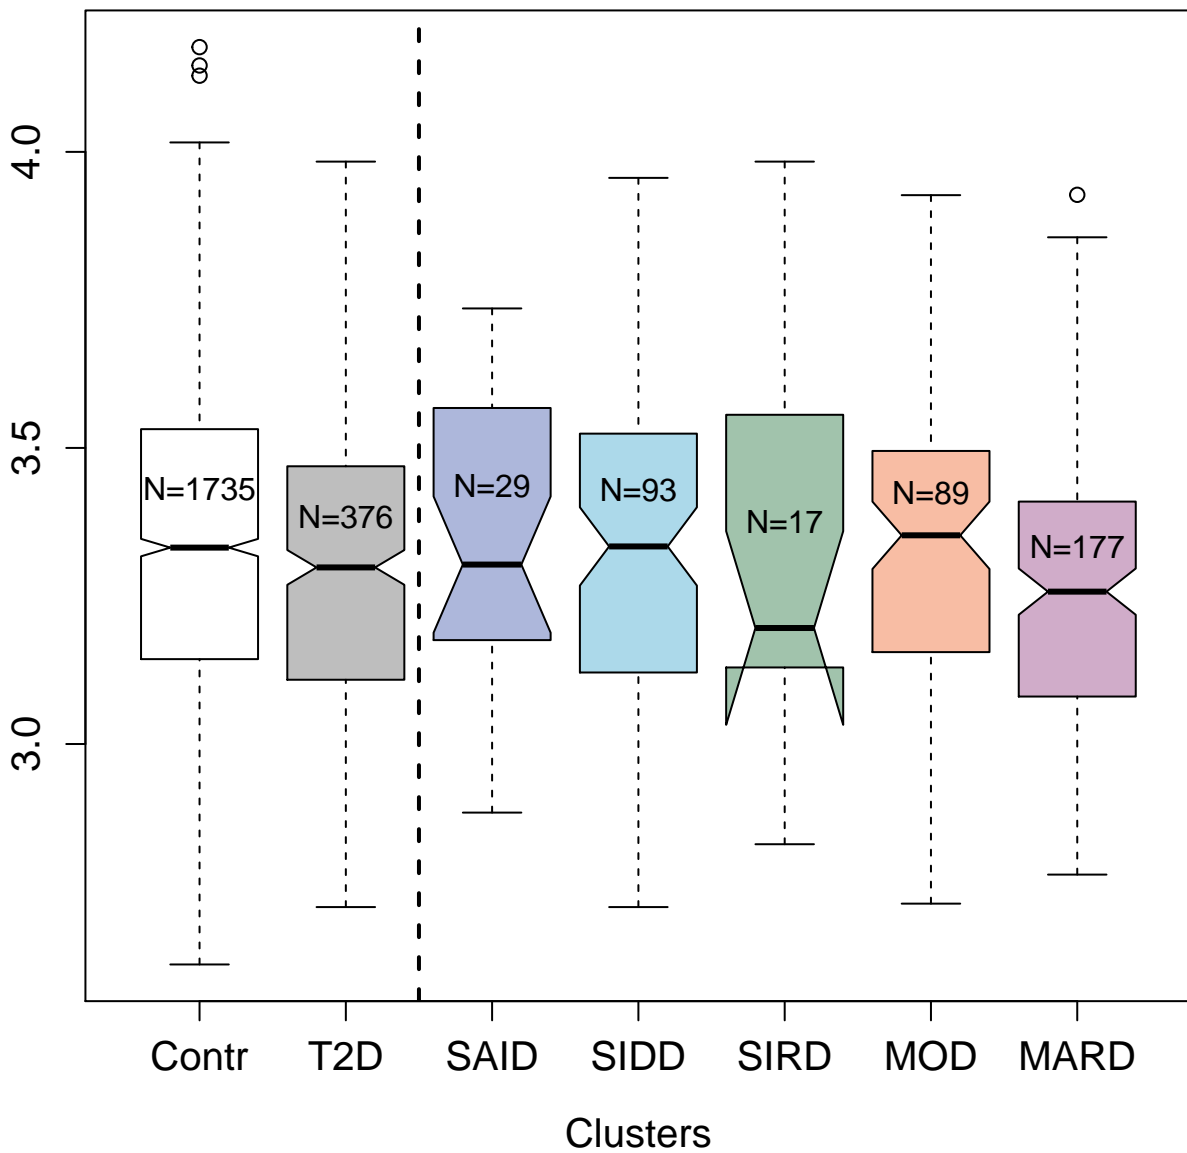

3419-49\_2 : Calcium/calmodulin-dependent protein kinase type II subunit delta

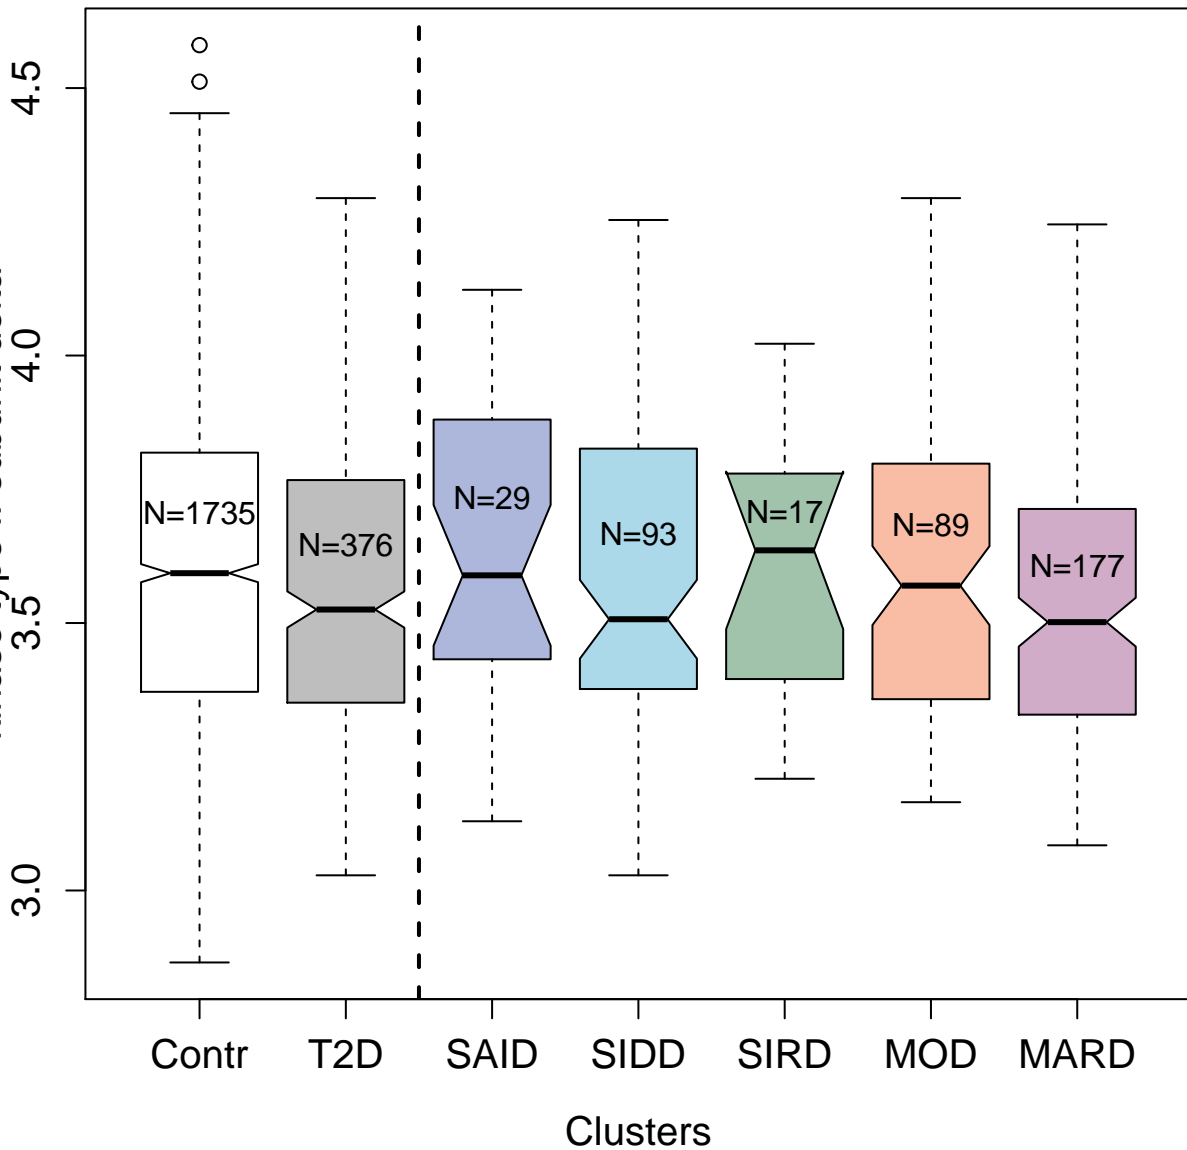

3452-17\_2: Tyrosine-protein kinase Lck

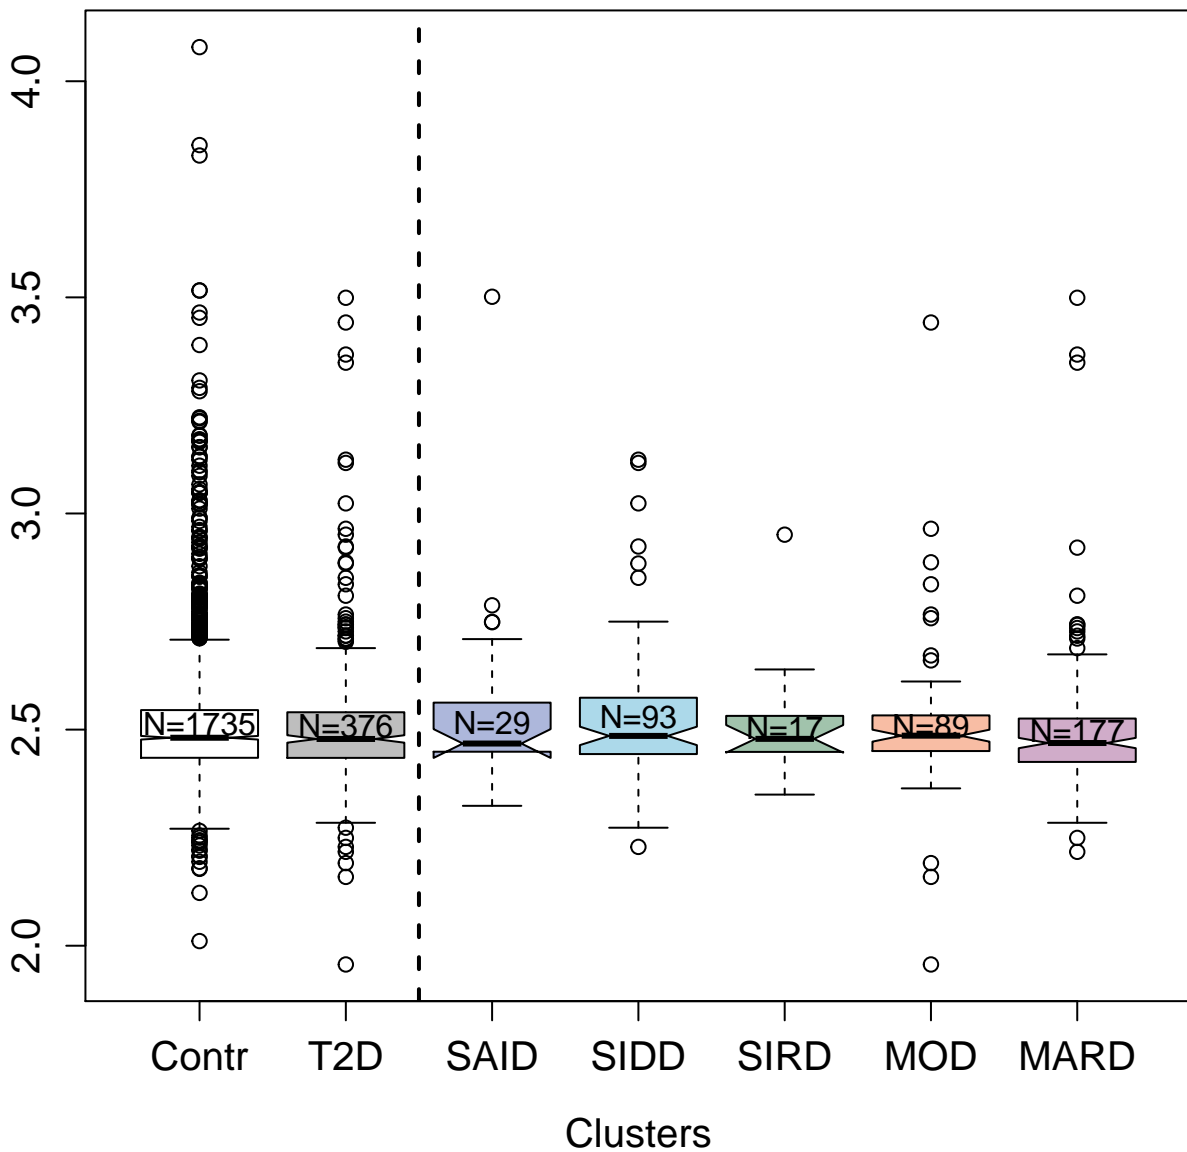

4931-59\_1 : Tissue Factor

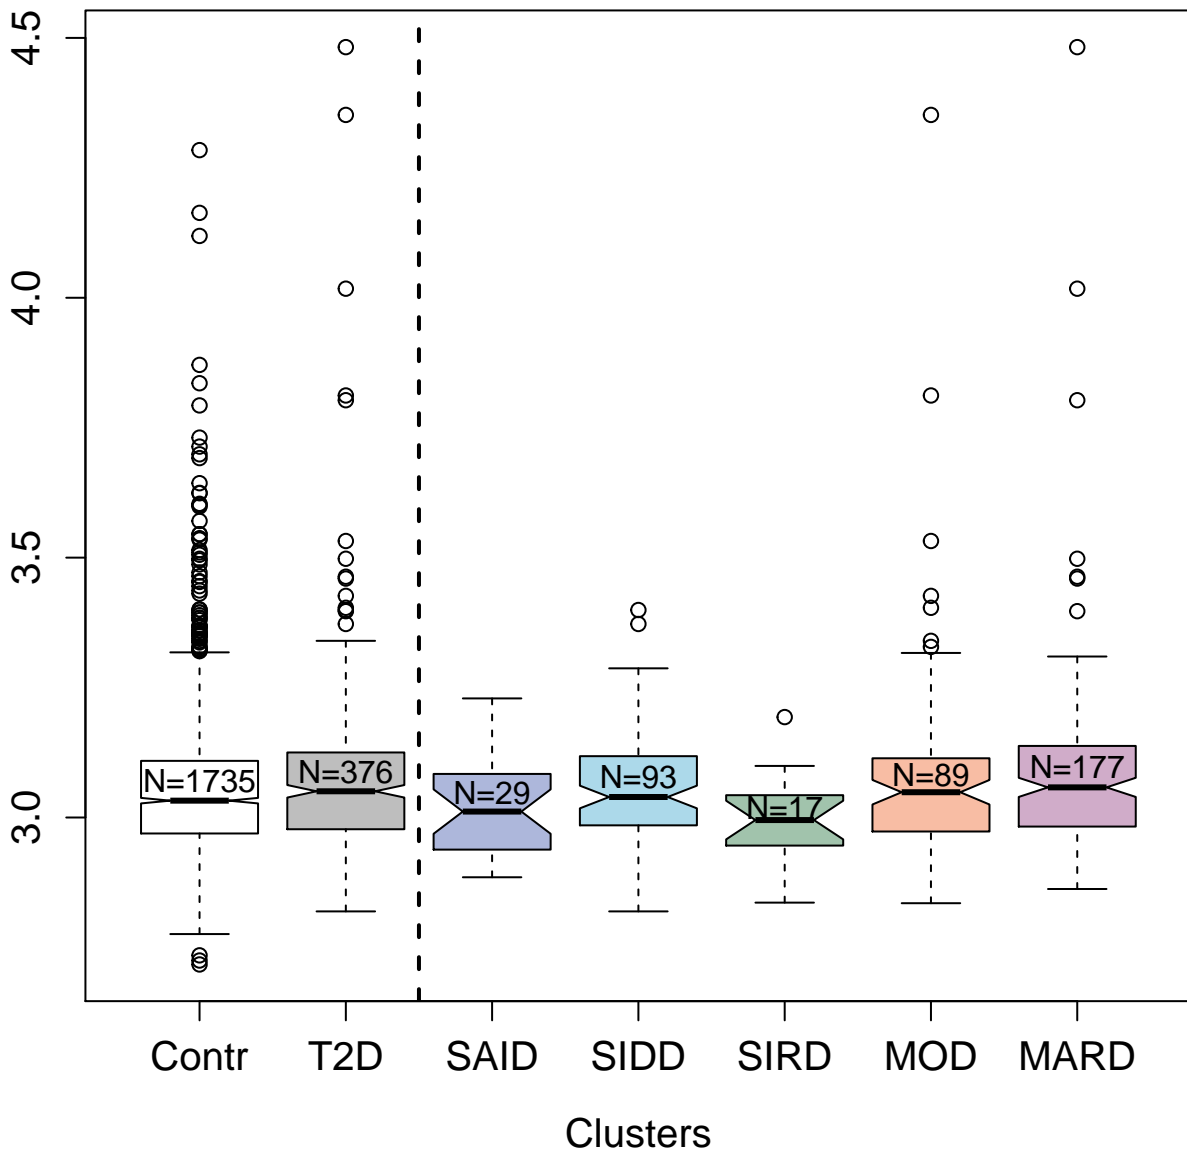

3890-8\_2 : L-lactate dehydrogenase B chain

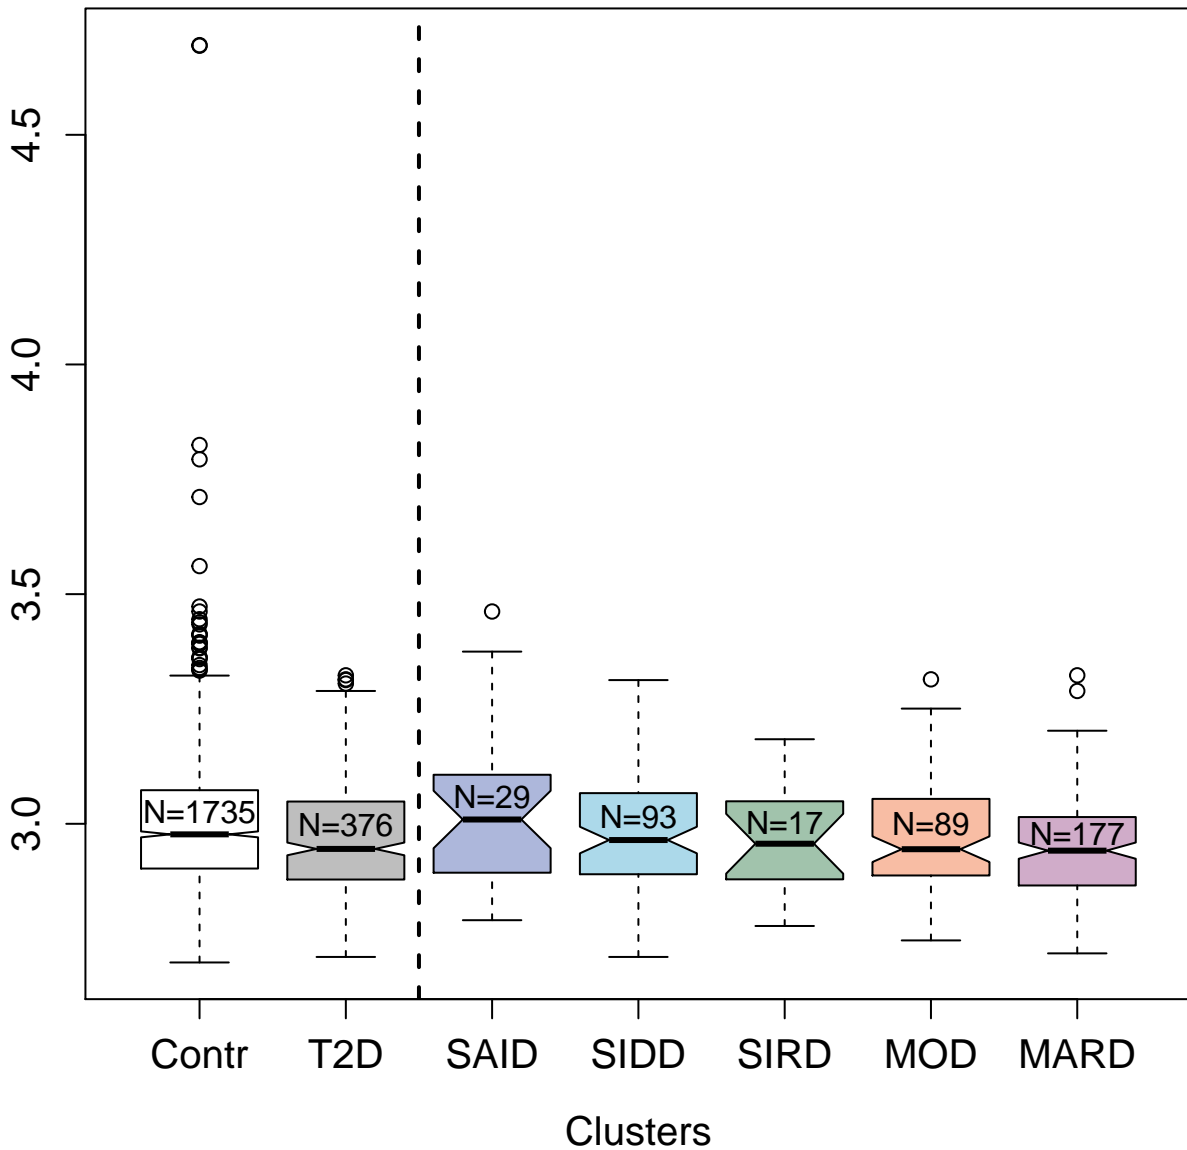

2760-2\_2 : Protein FAM107A

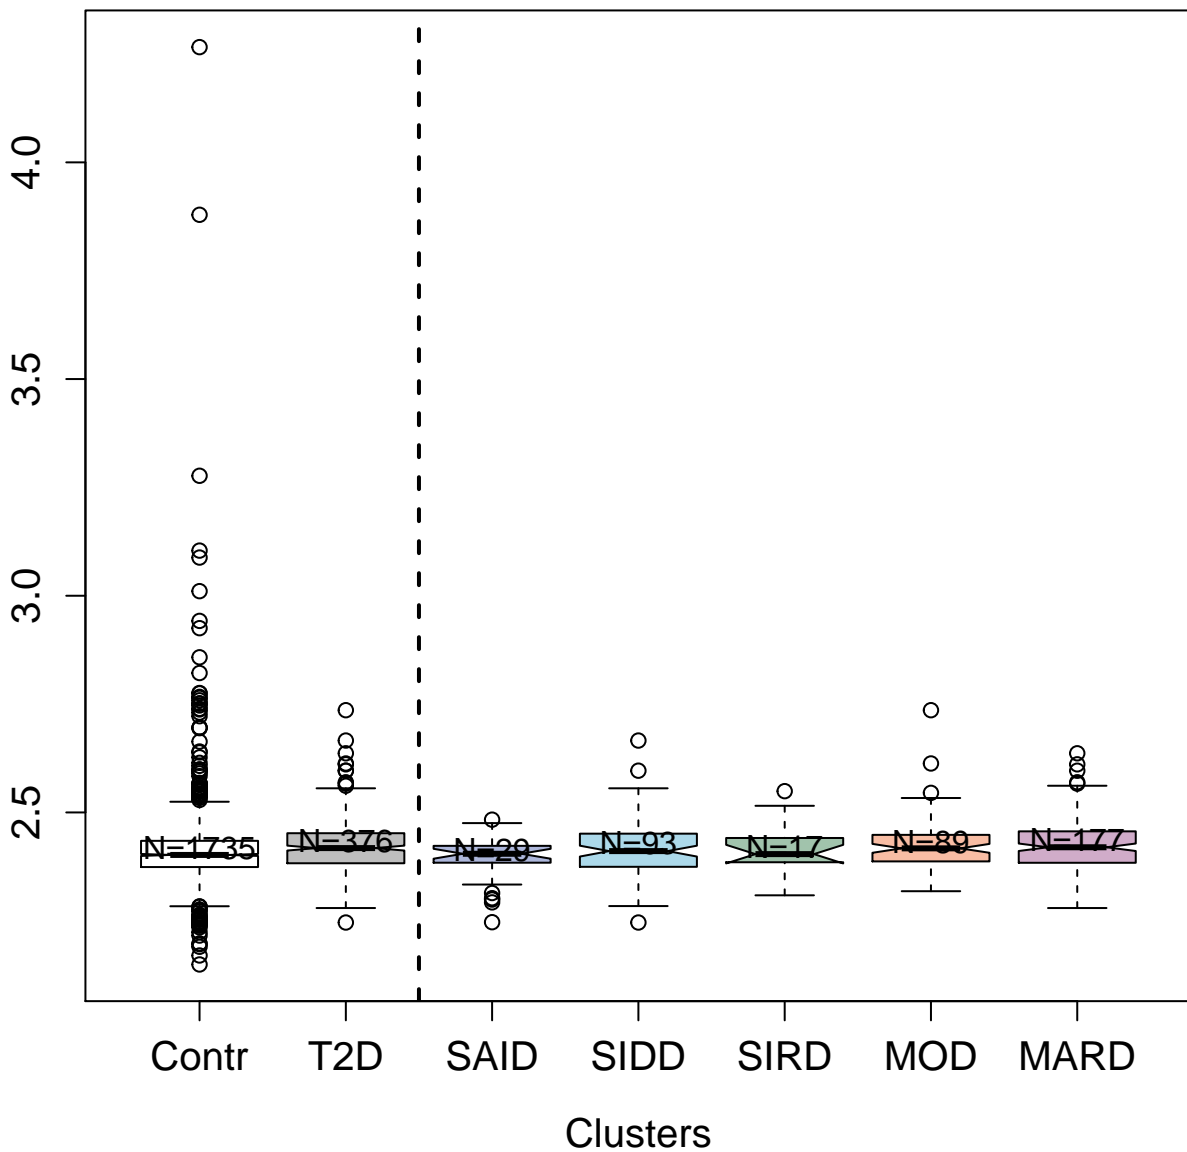

2666-53\_2 : Decorin

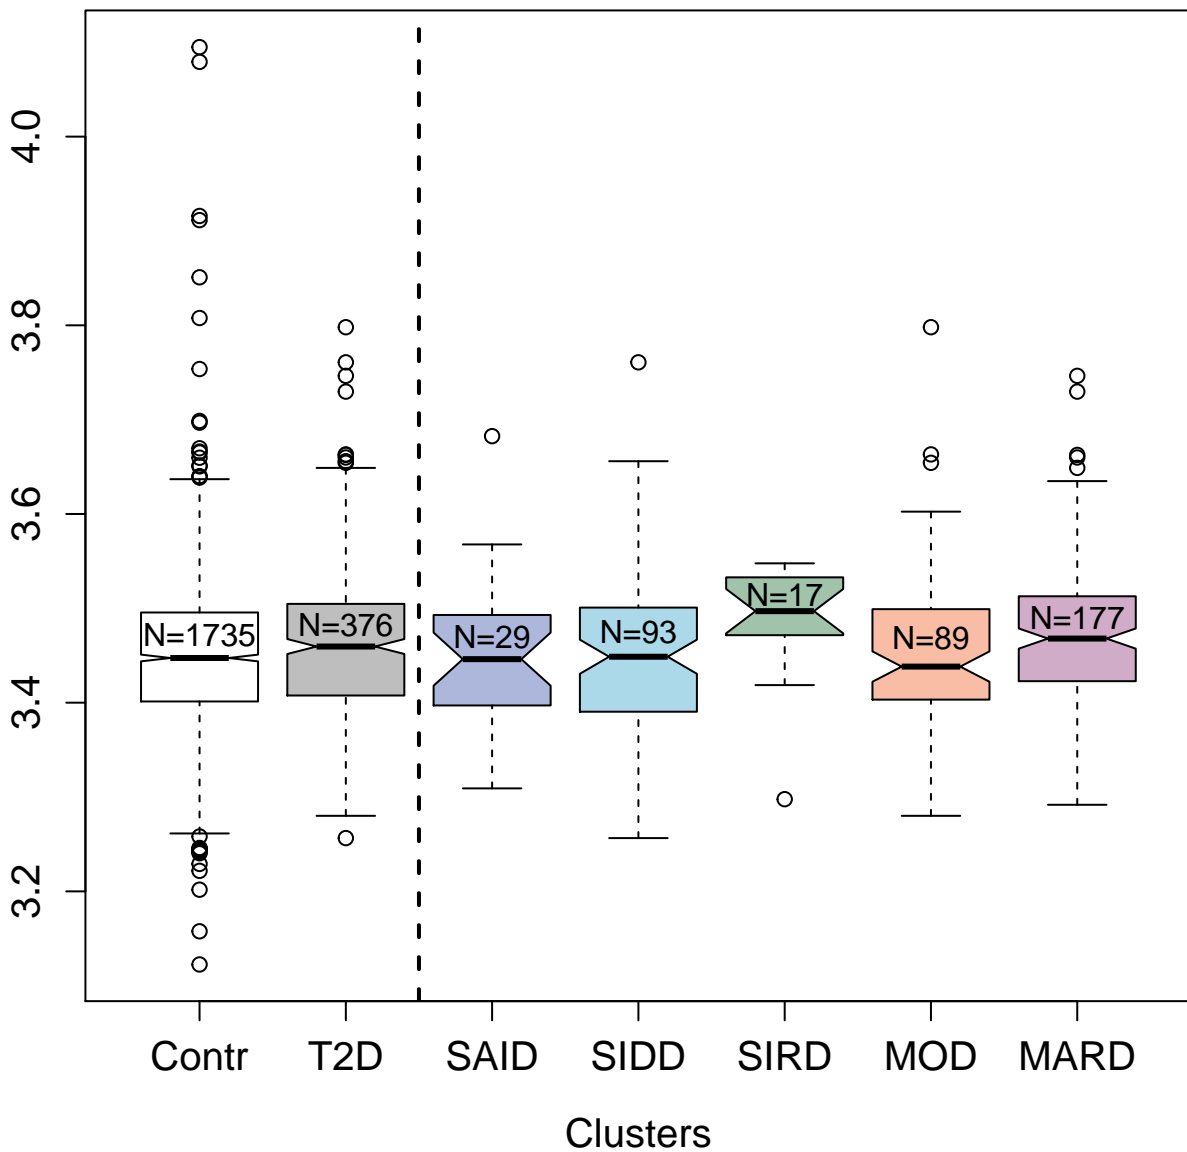

5465-32\_3 : Heparan-sulfate 6-O-sulfotransferase

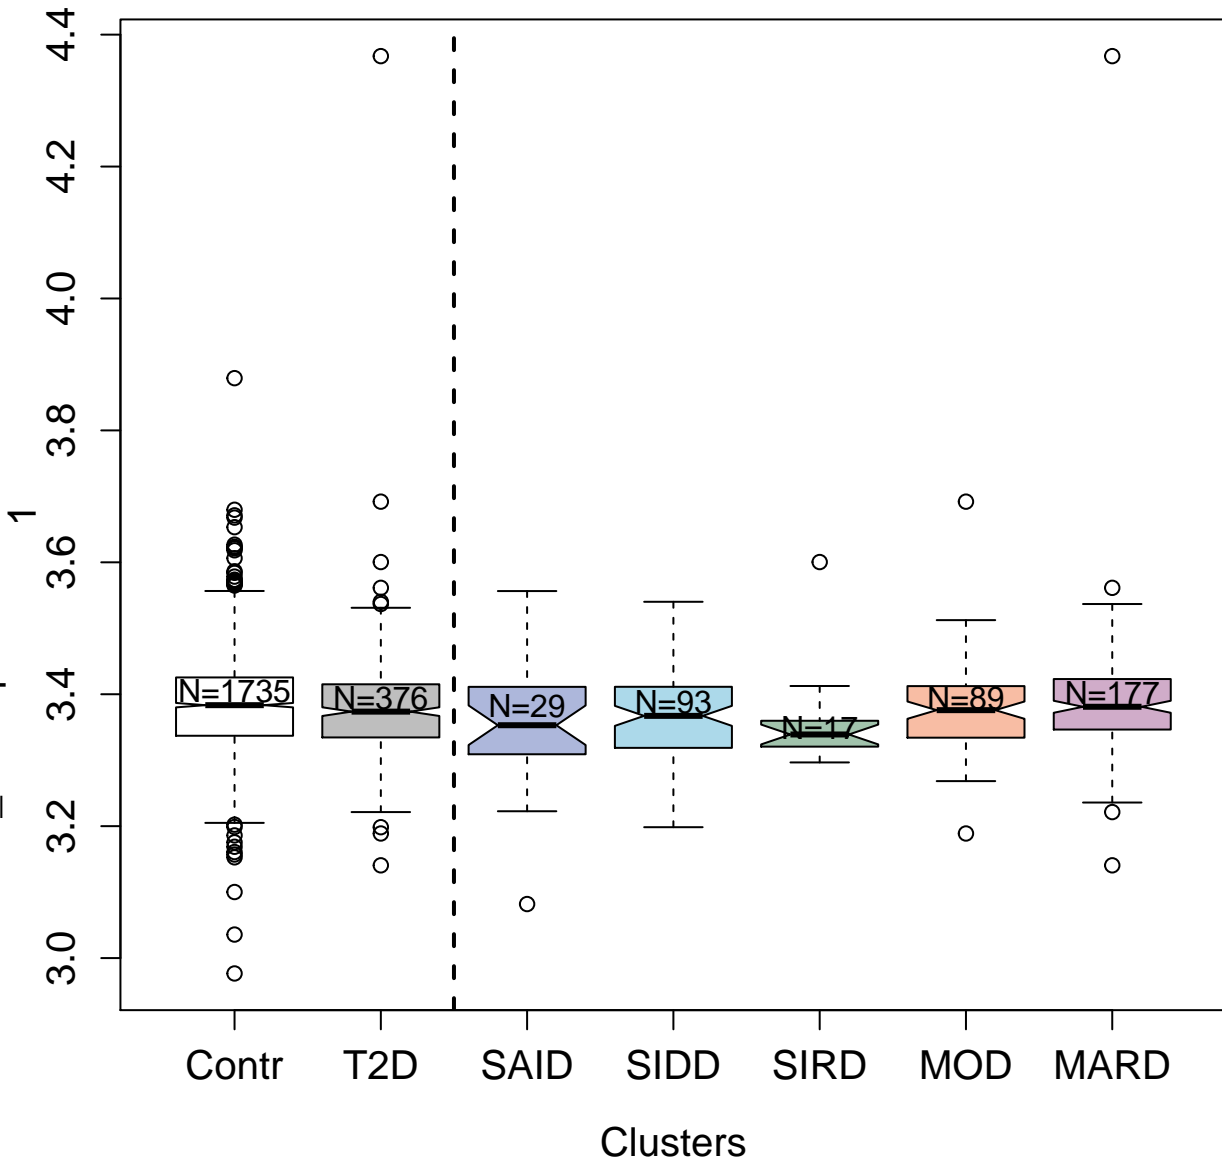





2723-9\_2 : Interleukin-37

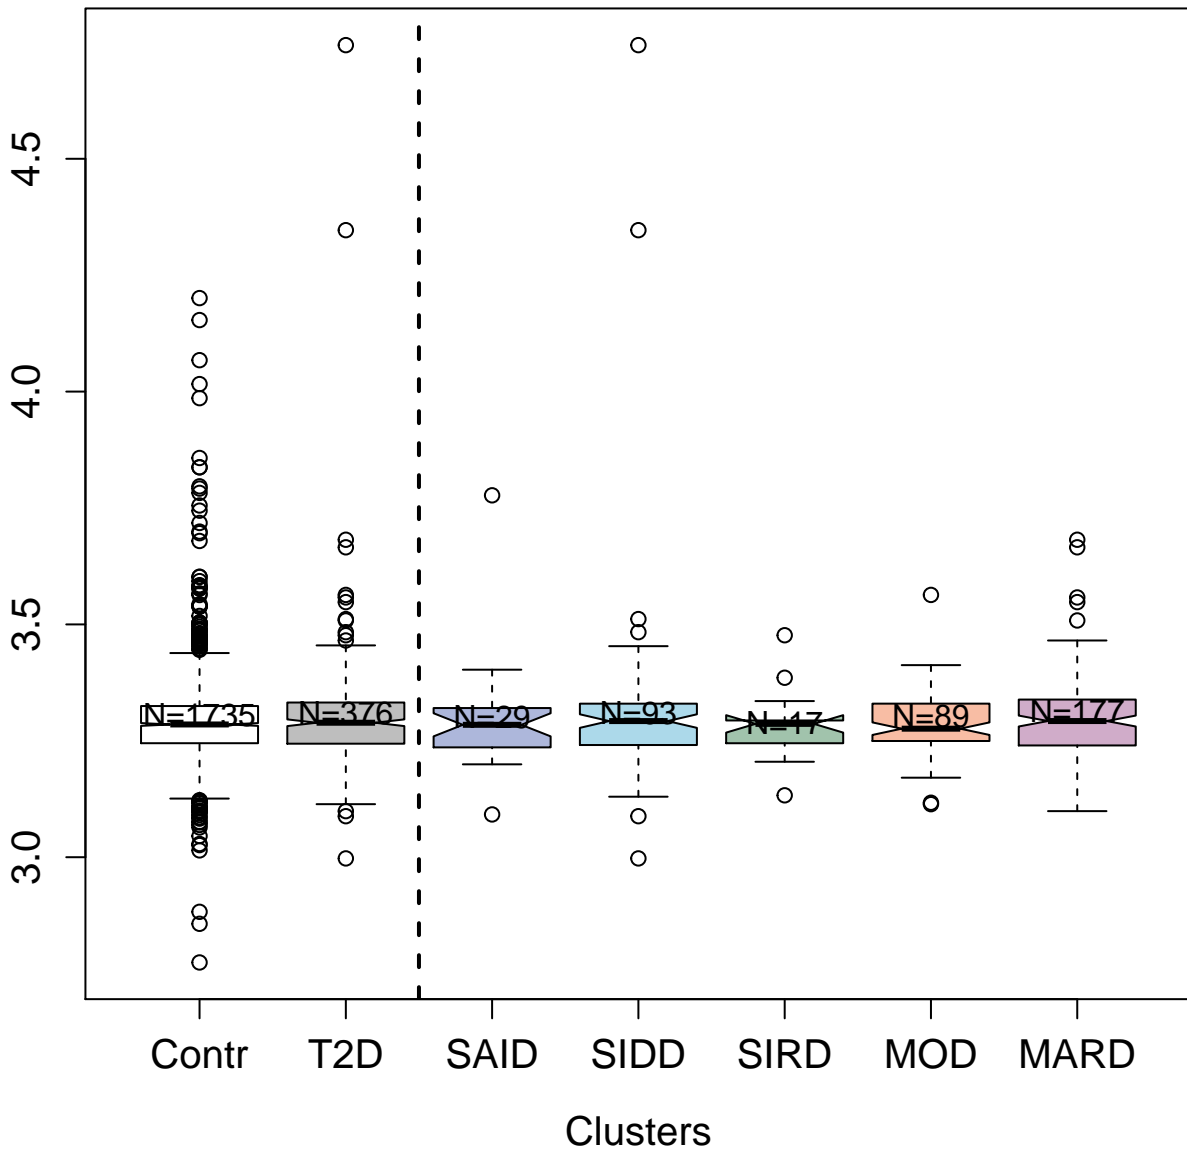

5093-47\_3 : Protein jagged-2

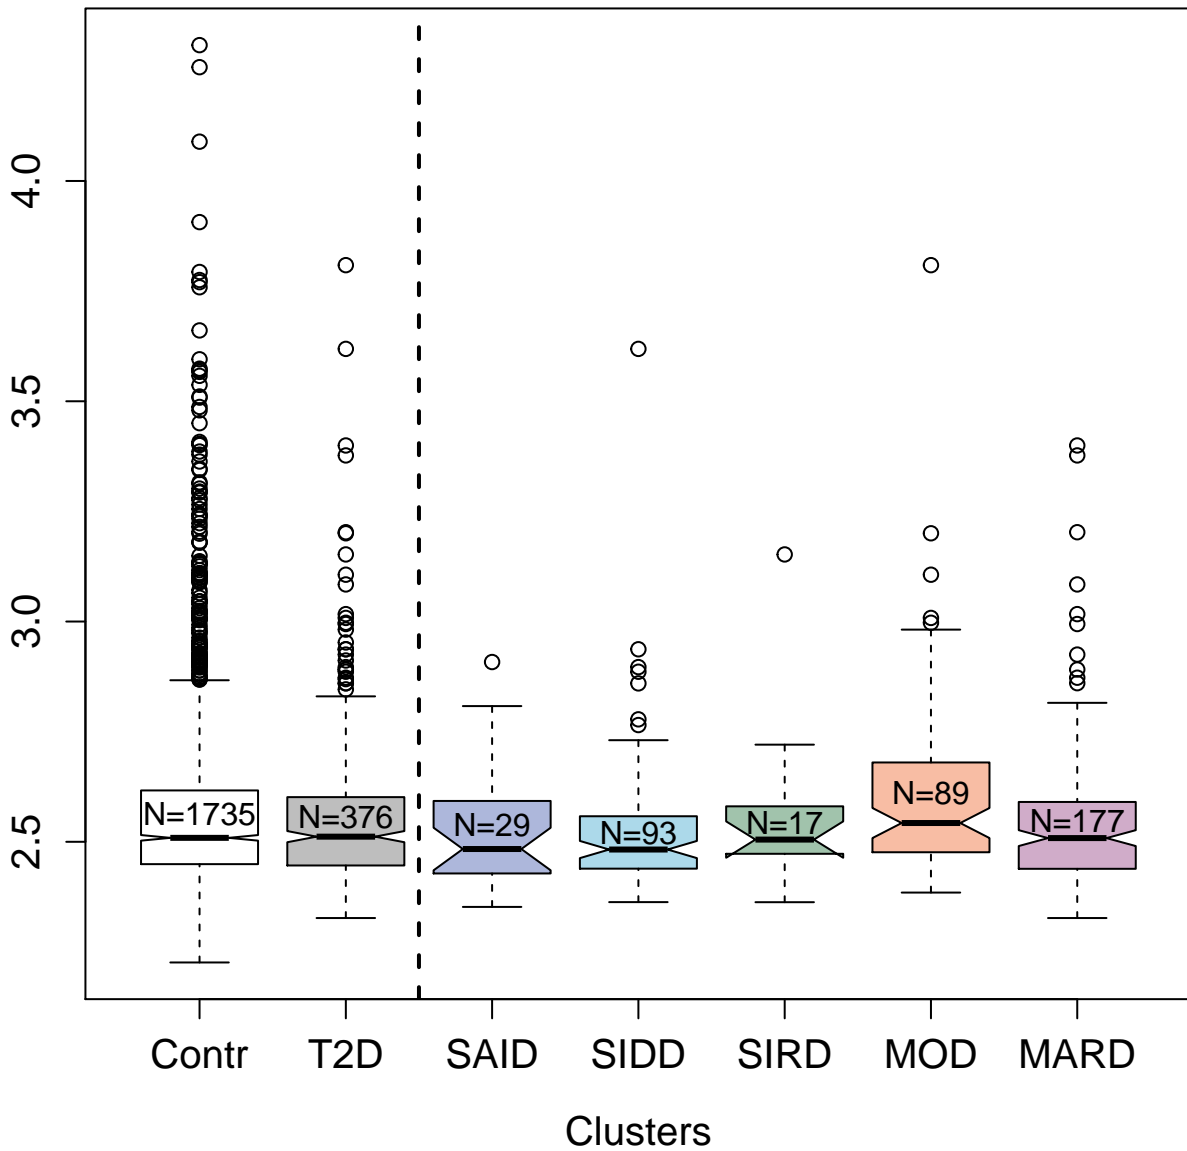

3171-57\_2 : Amyloid beta A4 protein

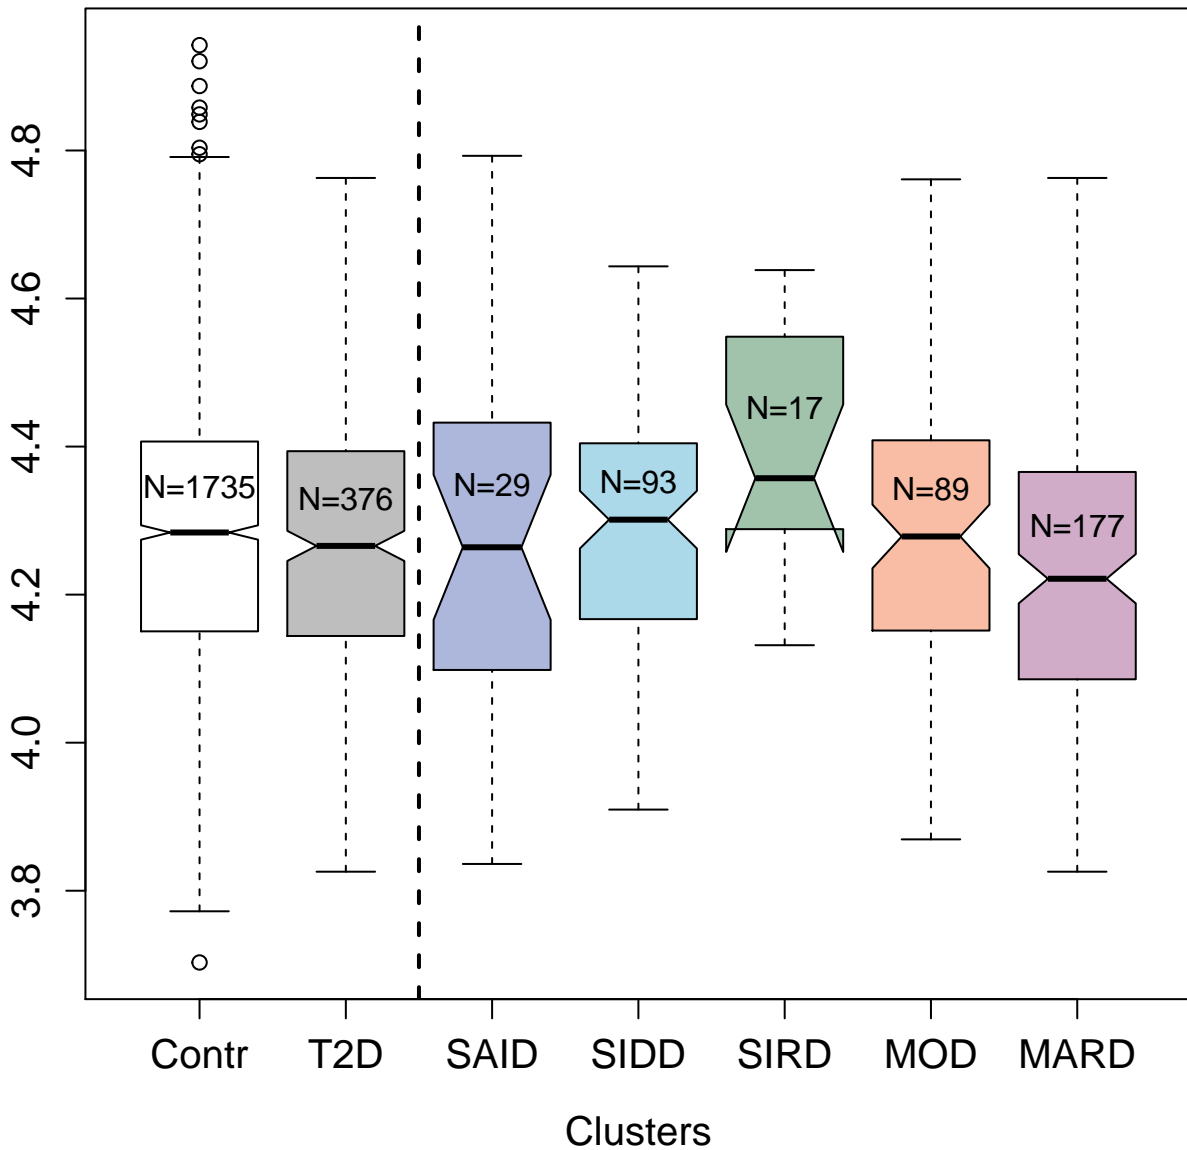

3854-24\_1 : Nascent polypeptide-associated complex subunit alpha

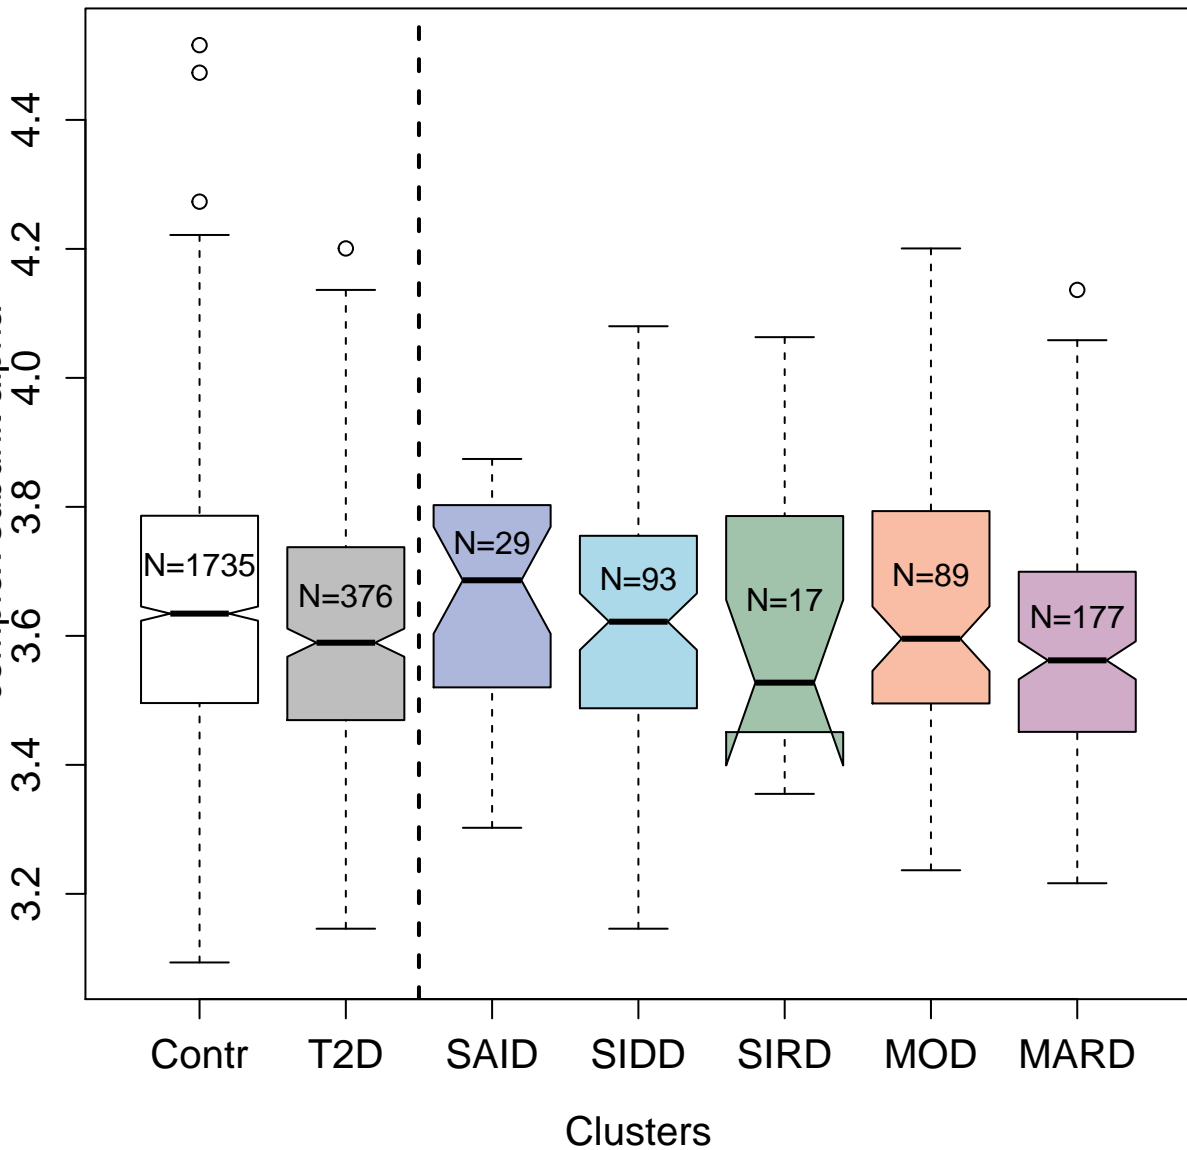

2889-37\_2 : Cardiograph-1

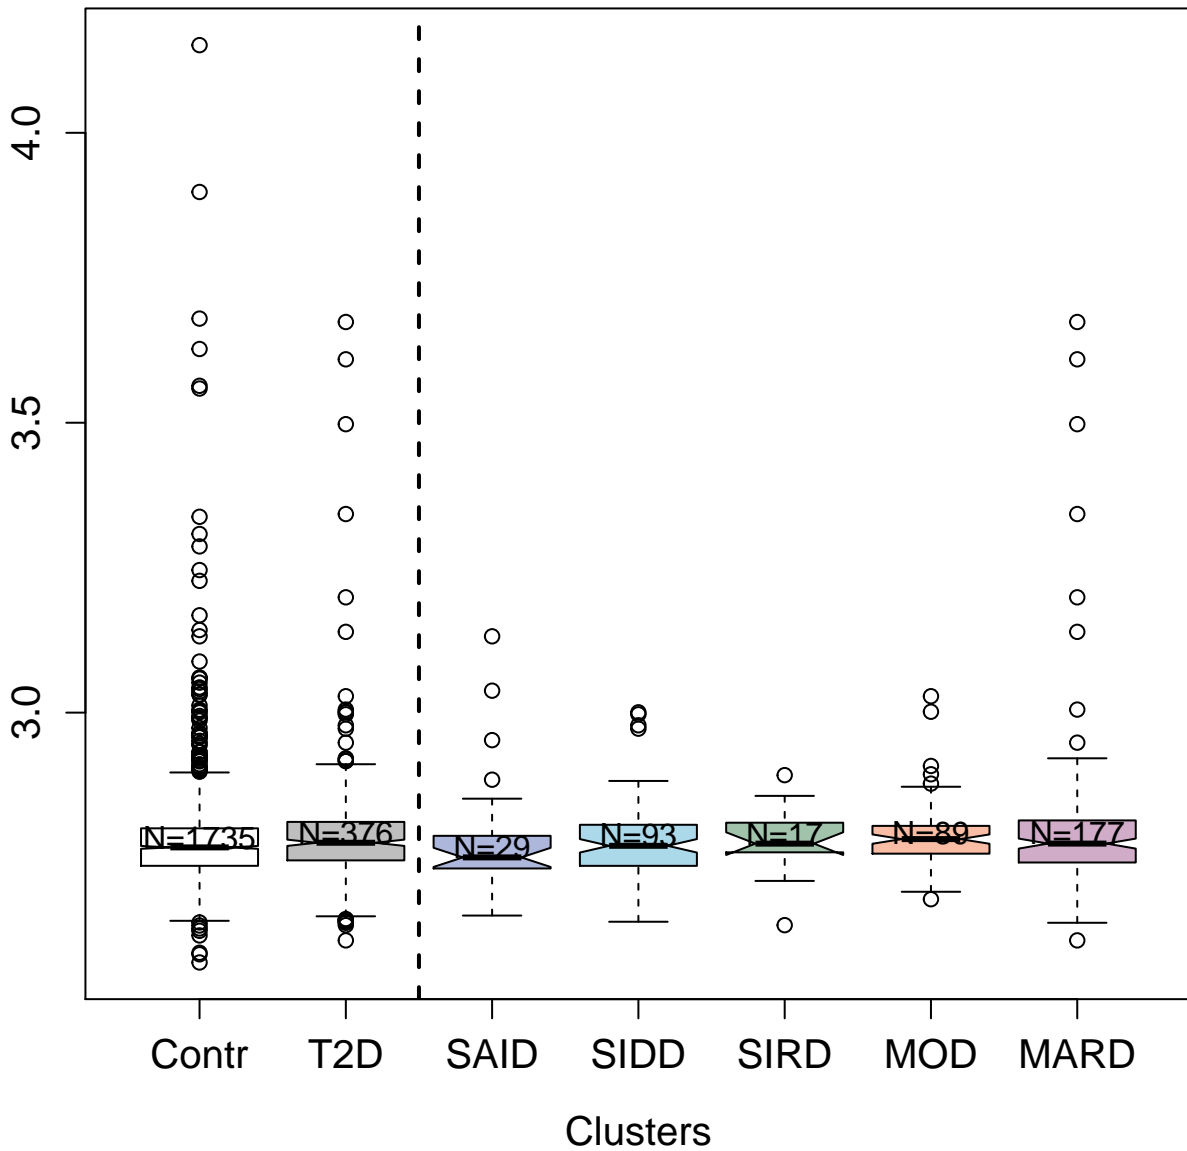

3122-6\_2 : Diablo homolog; mitochondrial

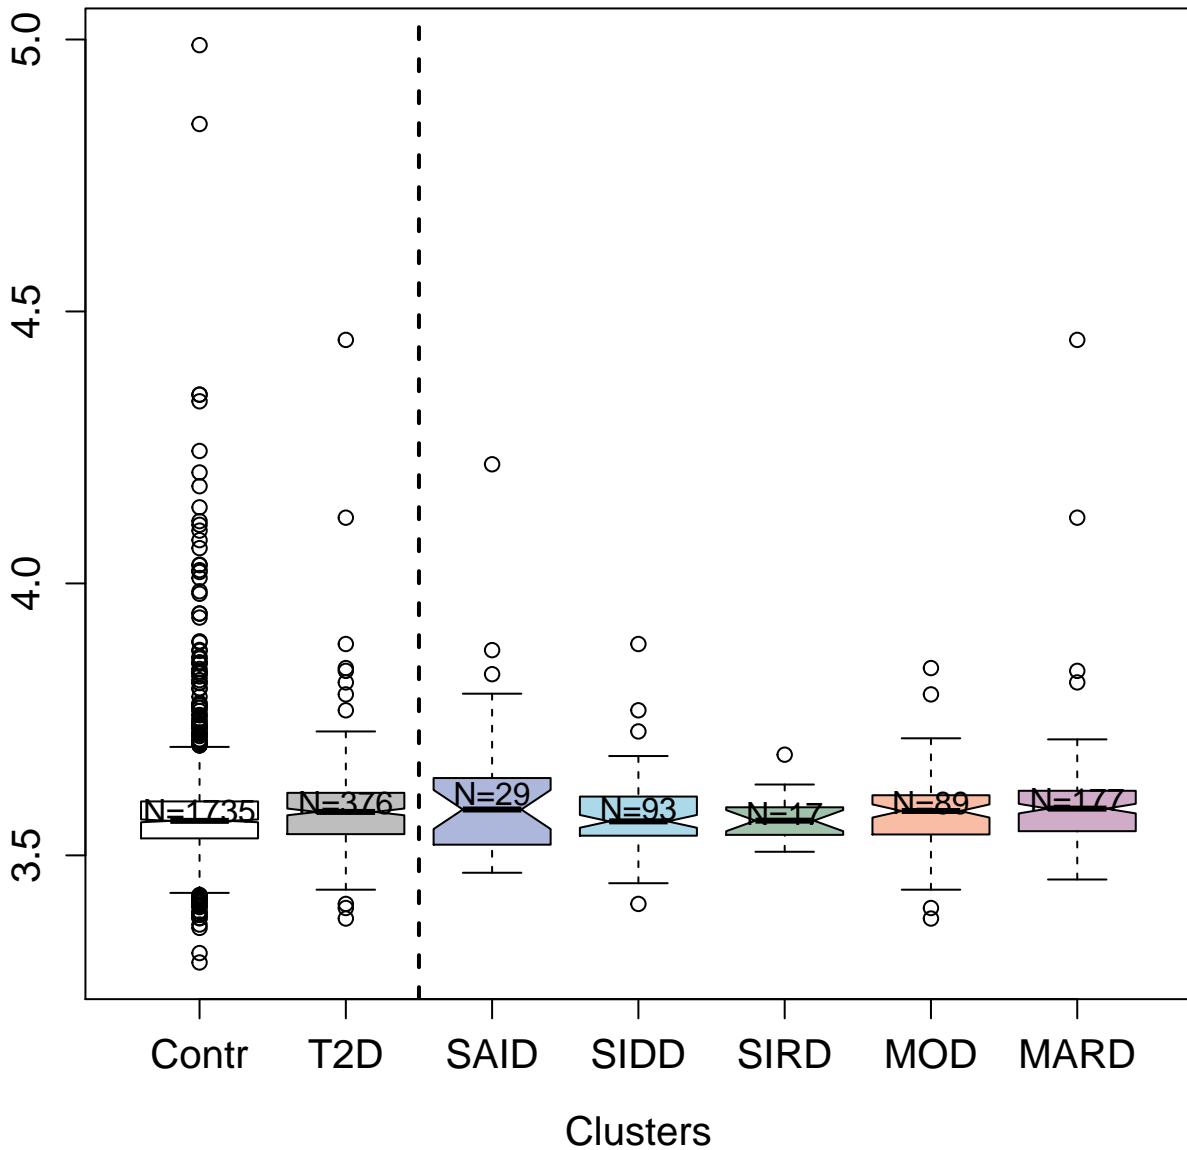

3412-7\_1 : Apoptosis regulator Bcl-2

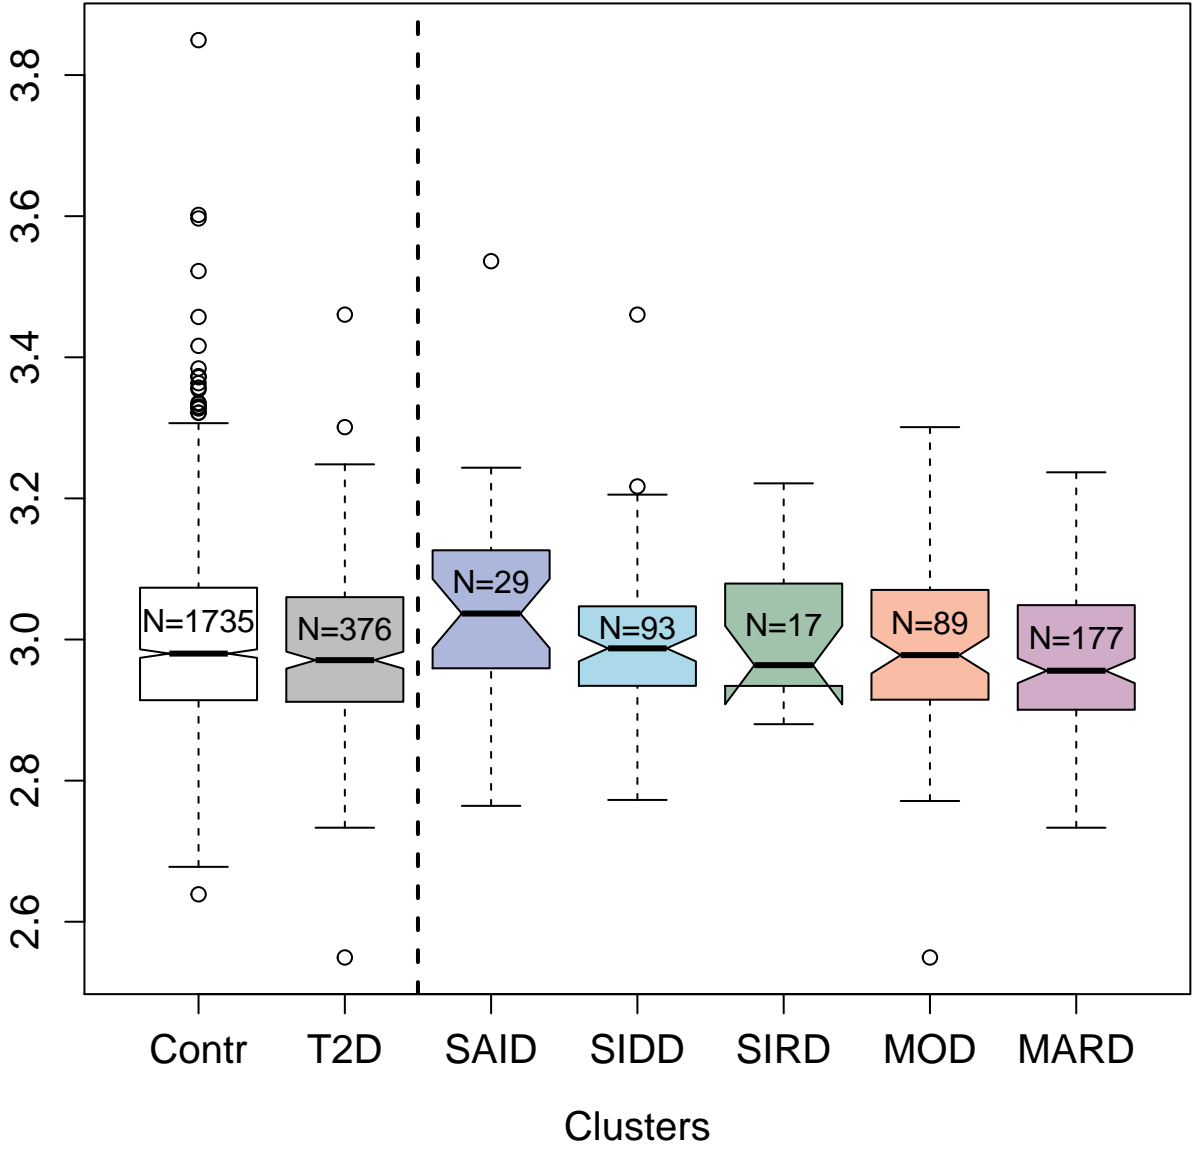



4359-87\_1 : Dual specificity  
tyrosine-phosphorylation-regulated kinase 3

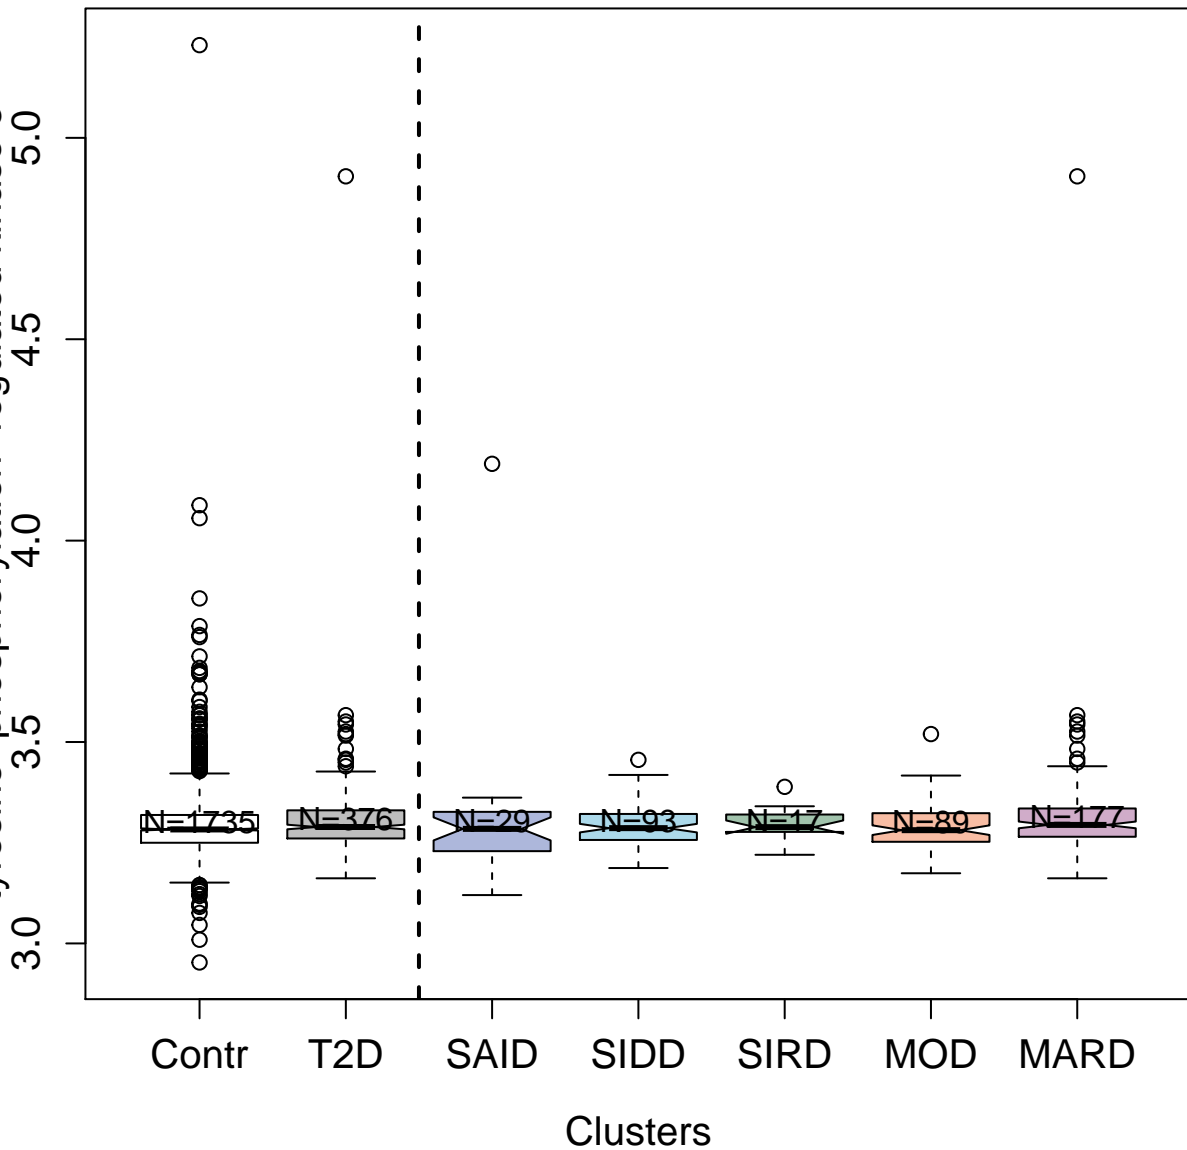

2418-55\_9 : Apolipoprotein E

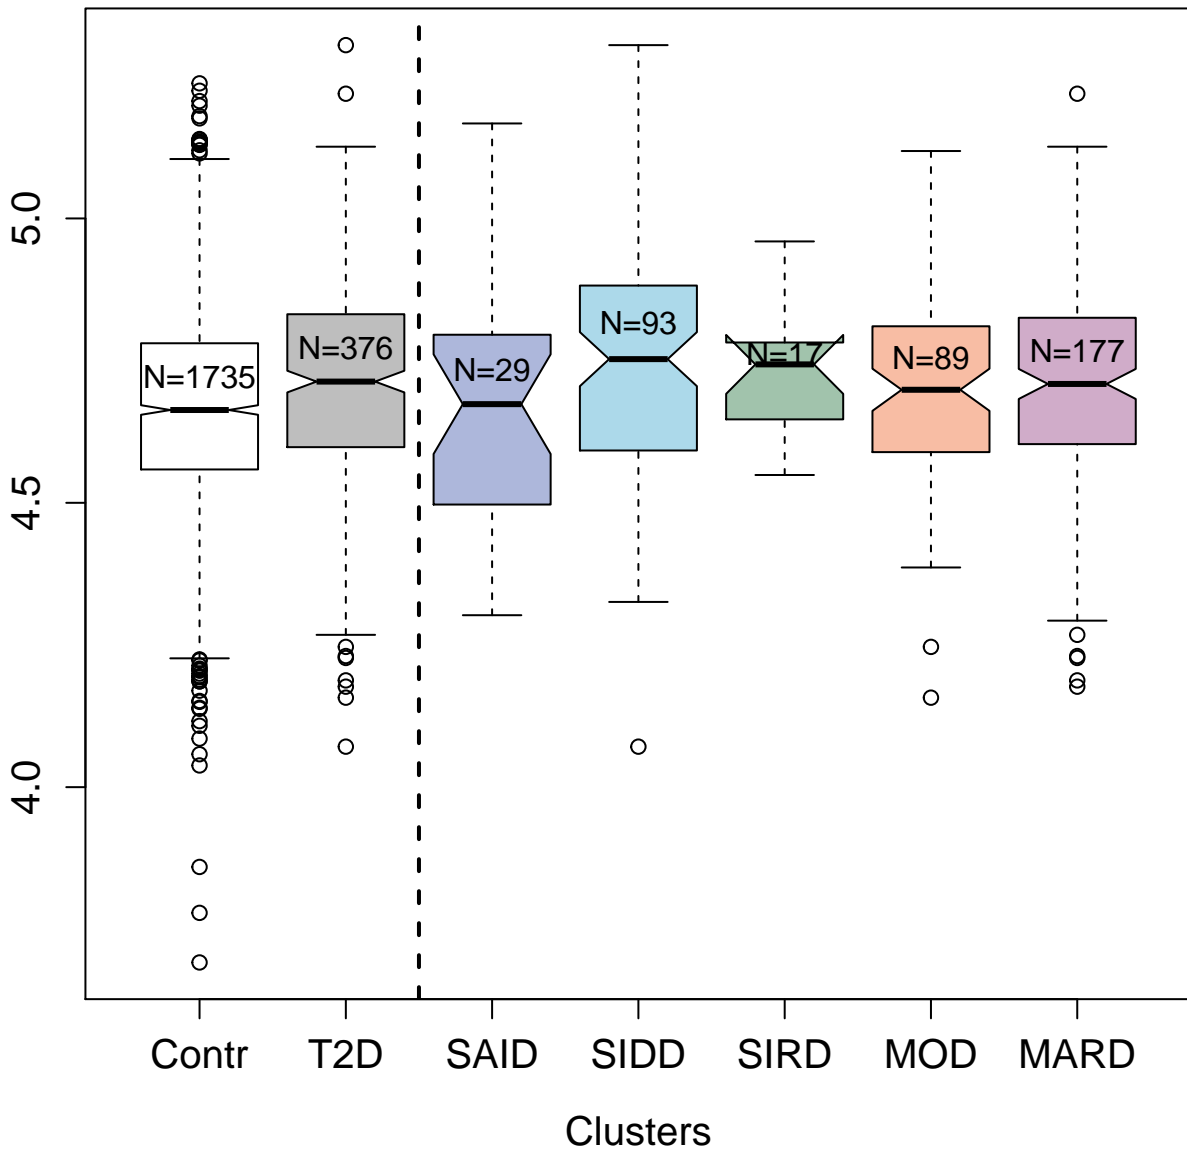

3666-17\_4 : Complement factor H-related protein 5

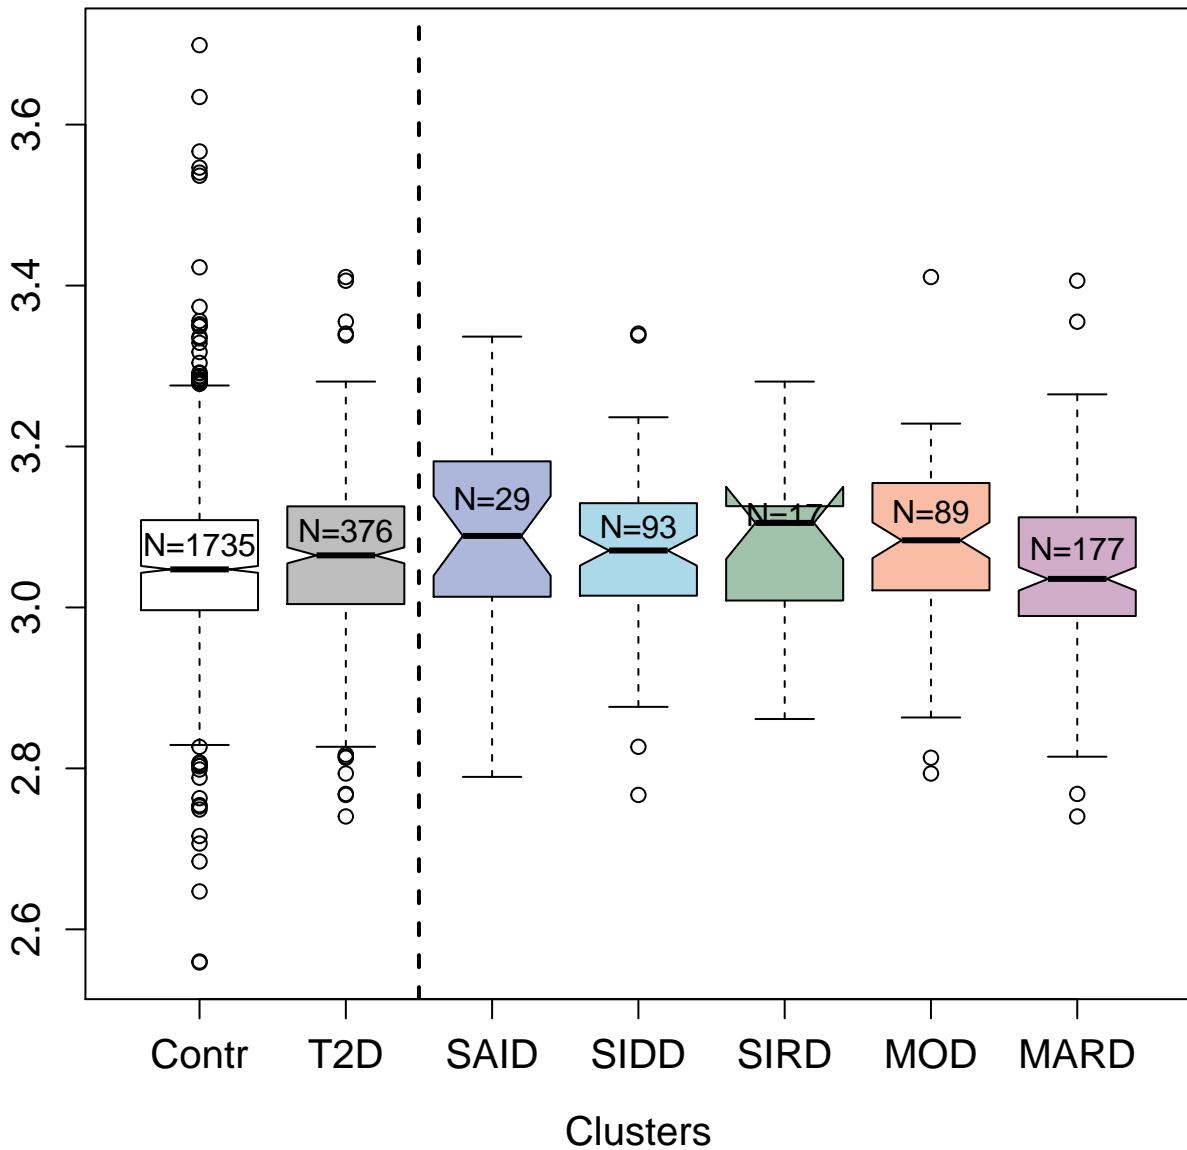

4834-61\_2 : Ephrin type-A receptor 2

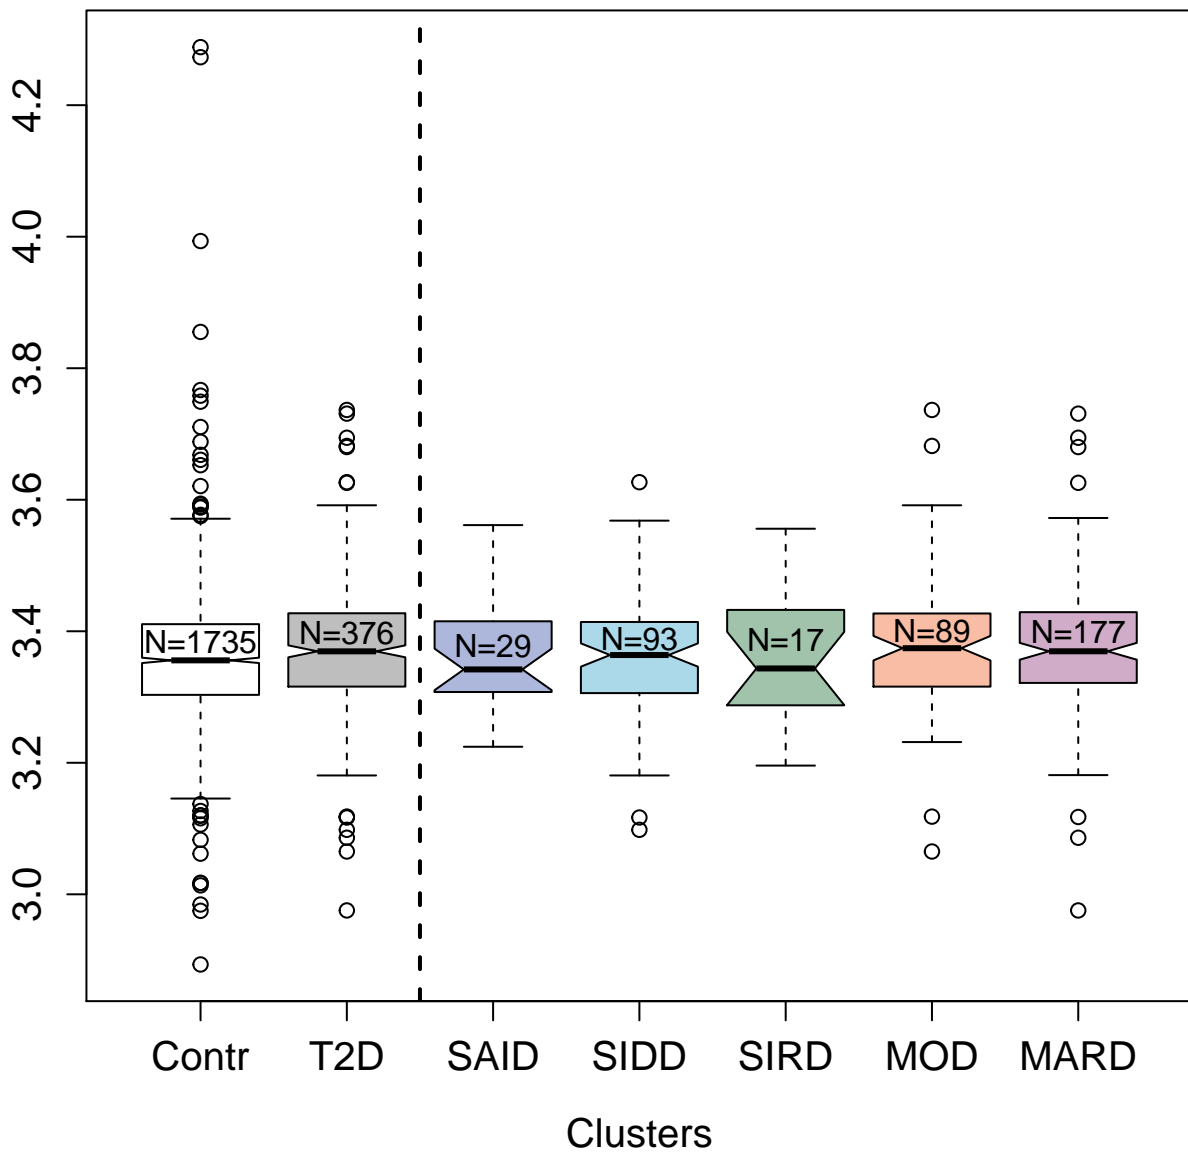

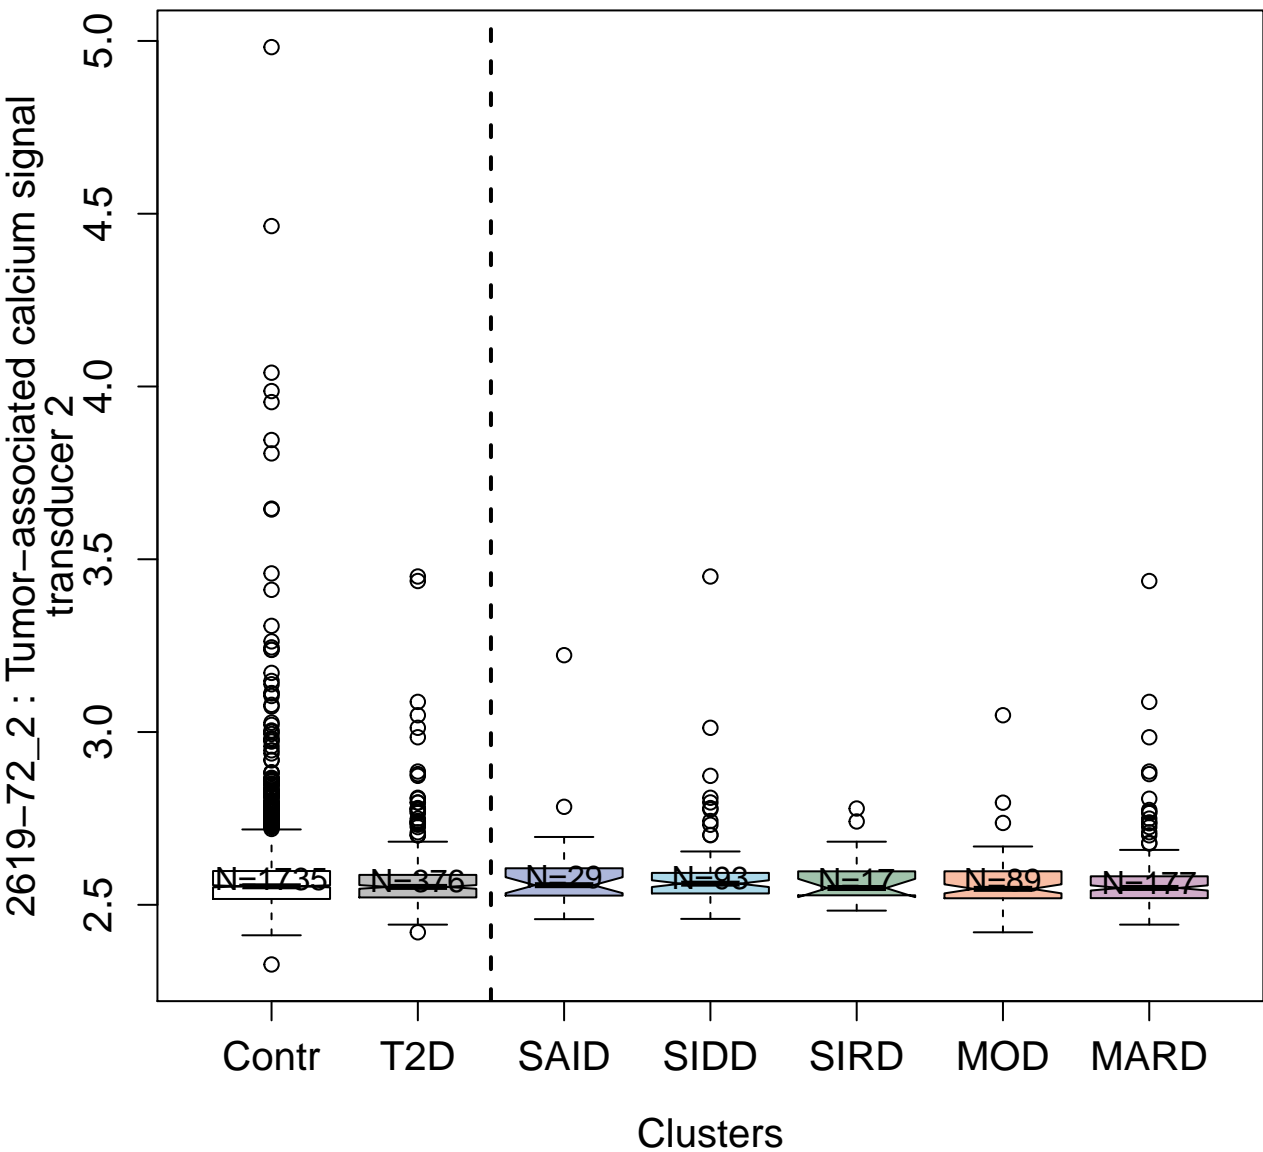

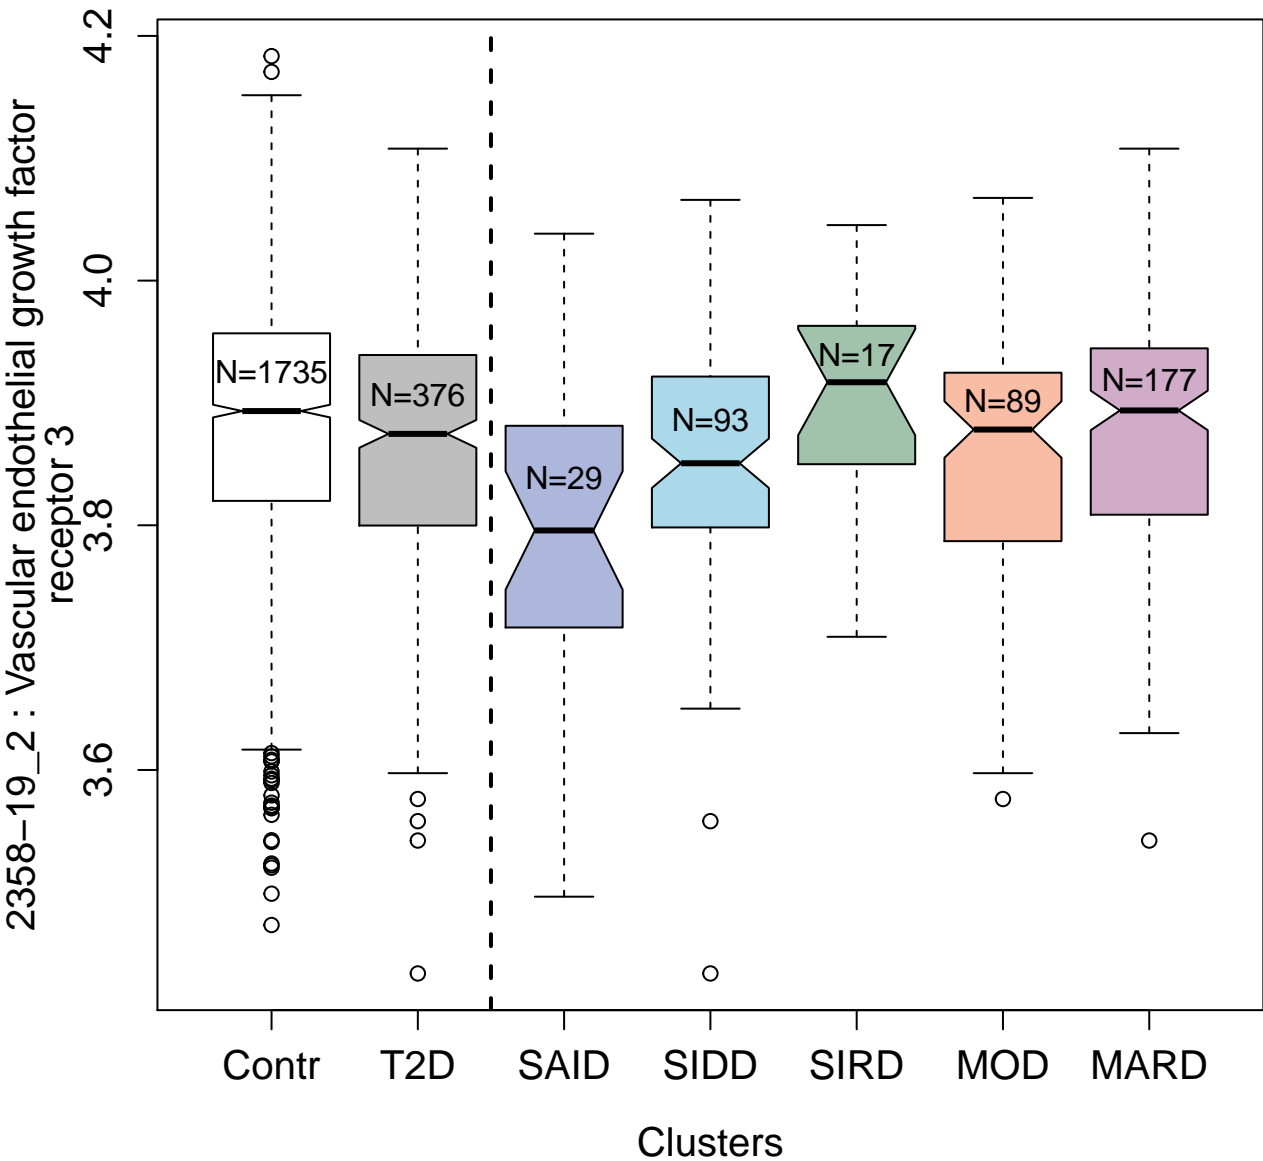

2693-20\_3 : Oncostatin-M

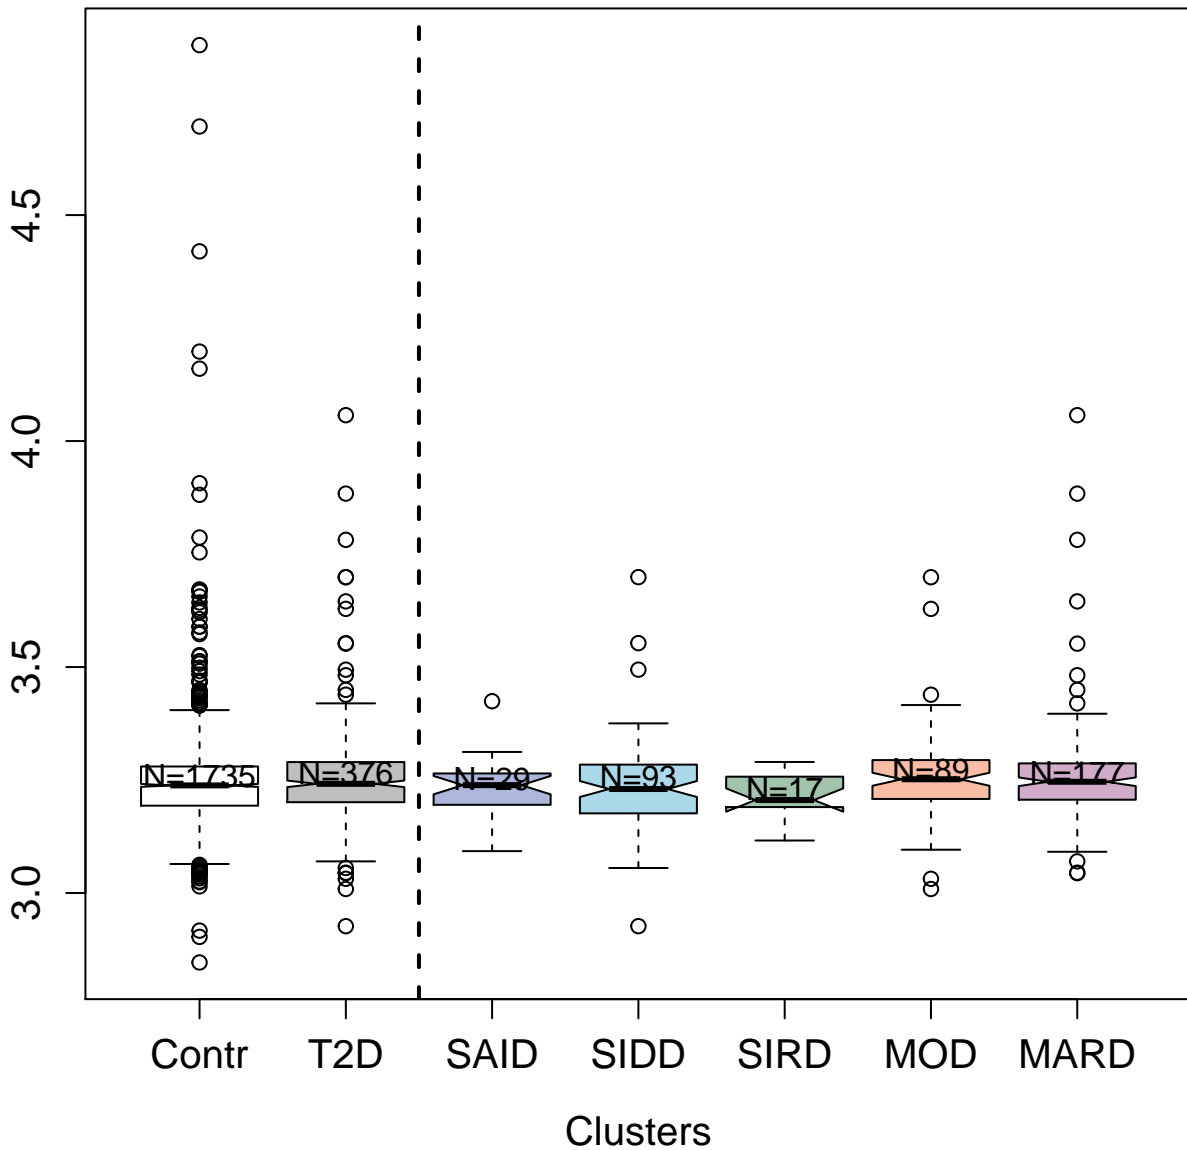

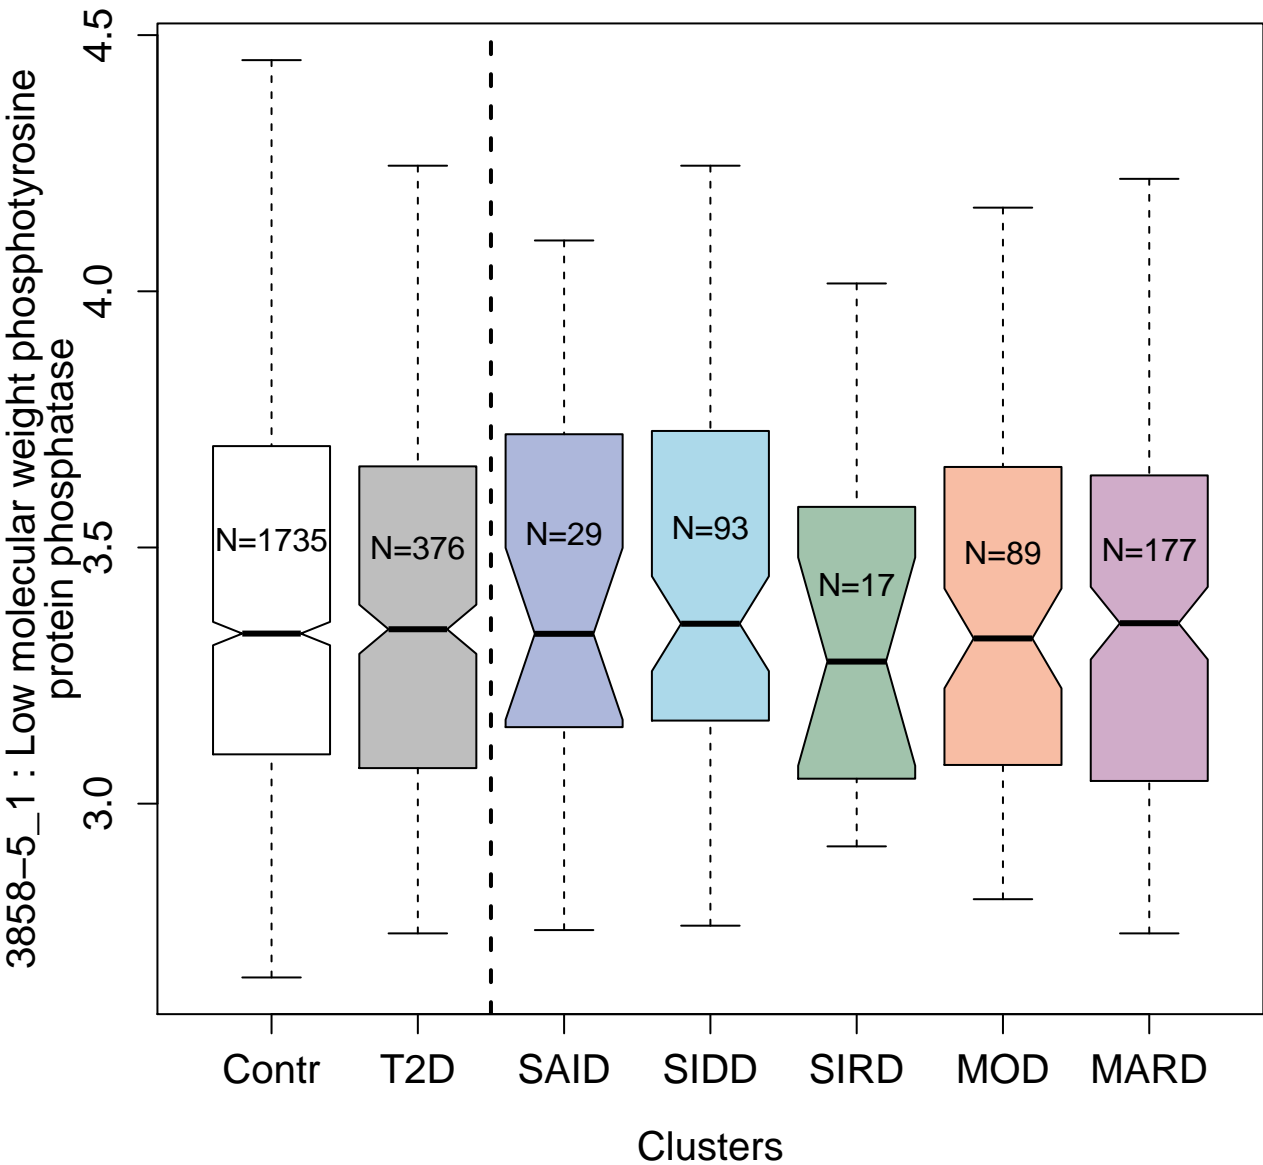



5250-53\_3 : Inosine-5'-monophosphate dehydrogenase 2

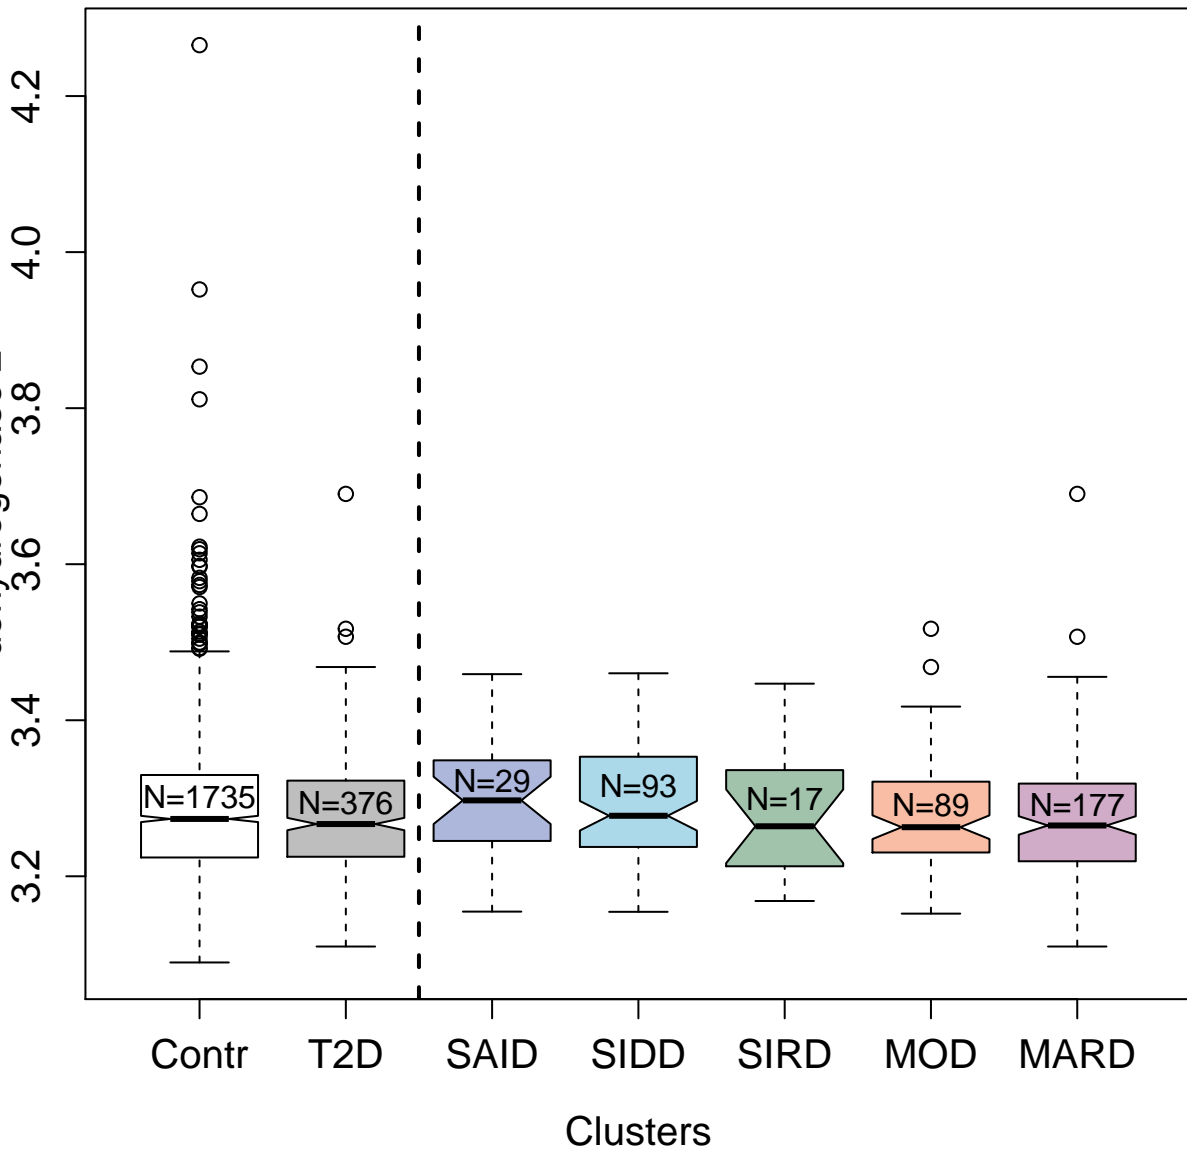

3220-40\_2 : Proto-oncogene tyrosine-protein kinase receptor Ret

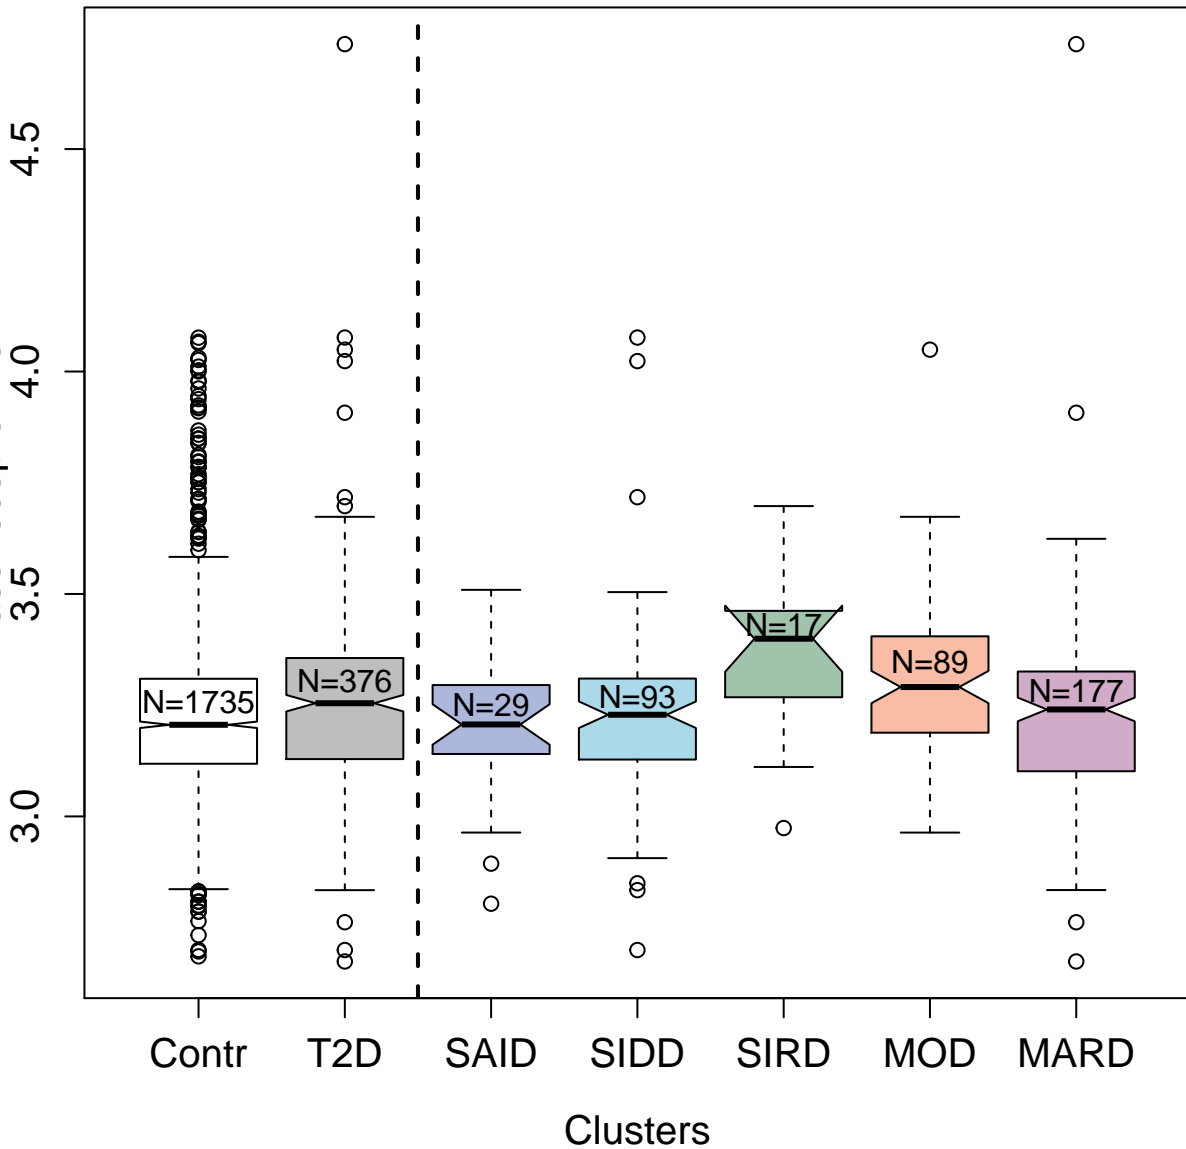

8446-4\_3 : Pituitary adenylate cyclase-activating polypeptide 27

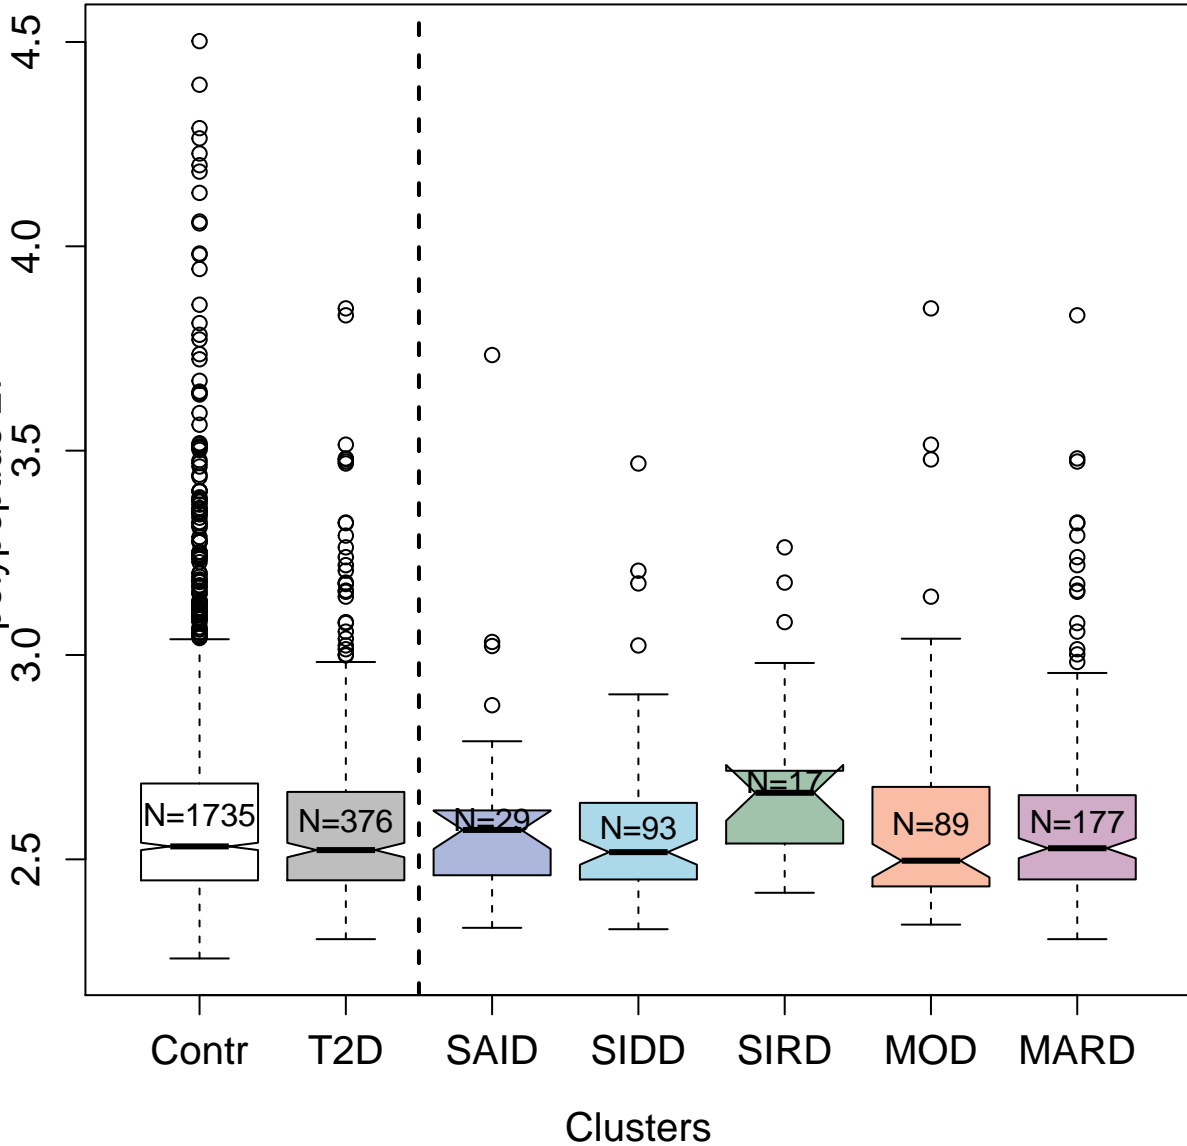

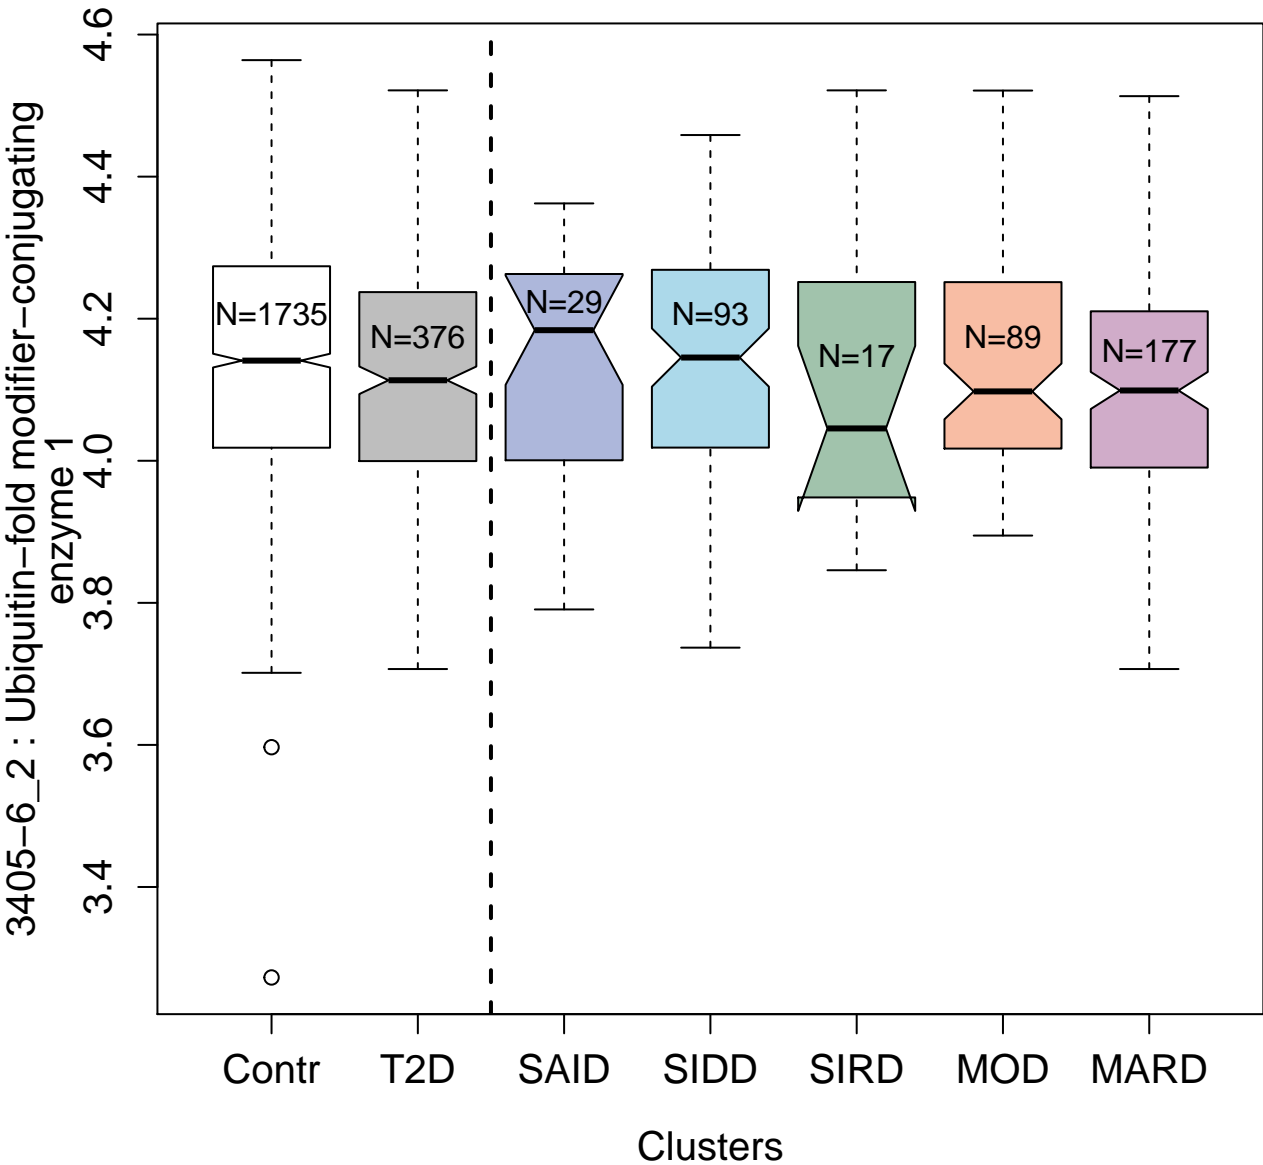

10339-48\_3 : Gamma-enolase

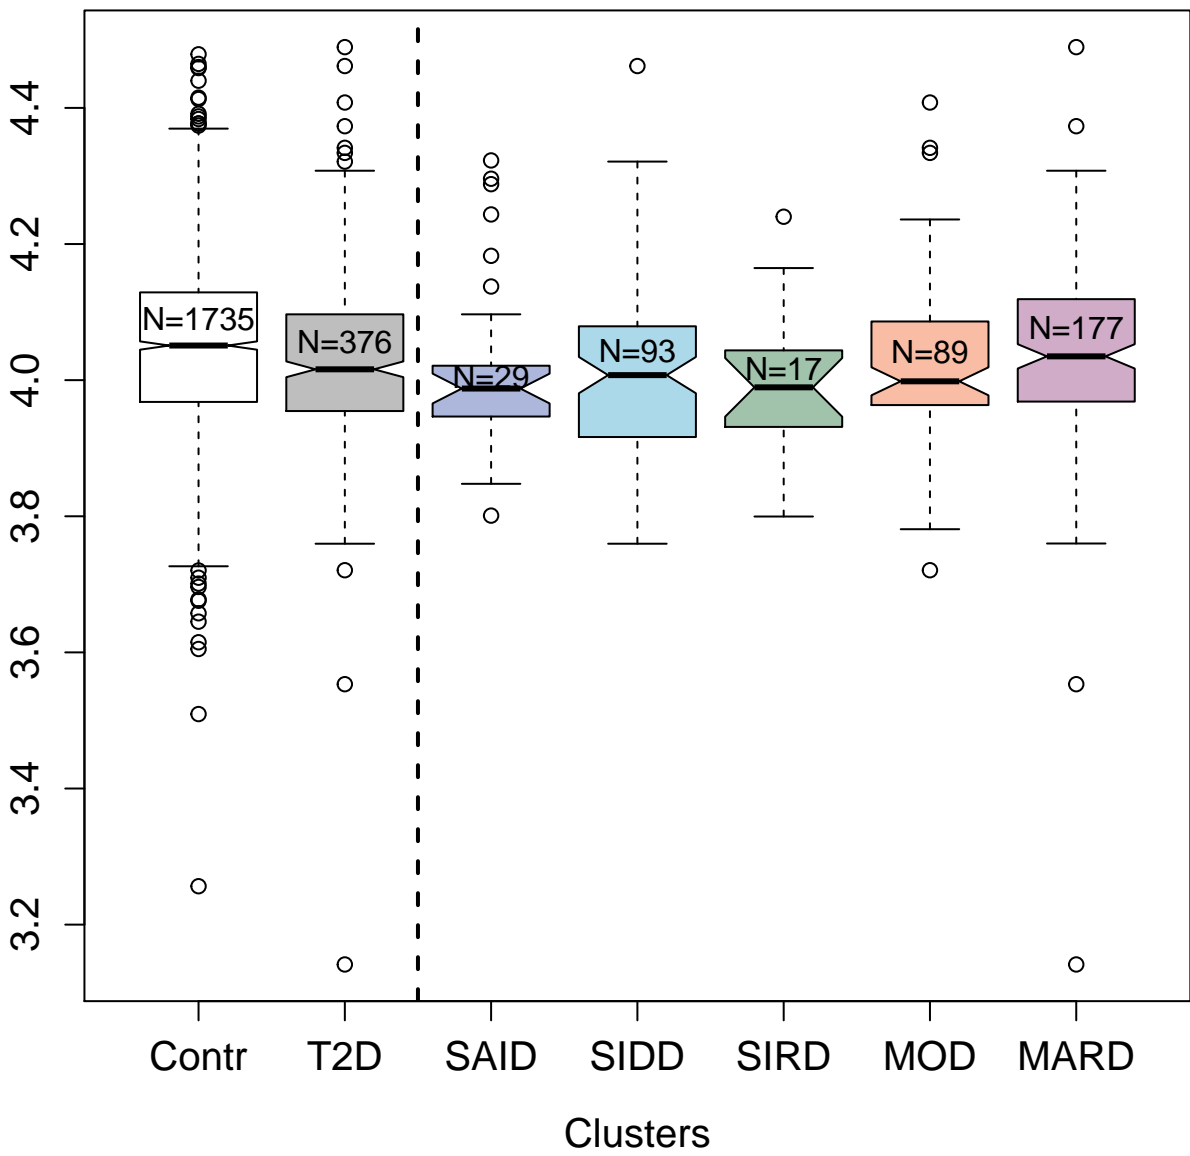

9182-3\_3 : Low-density lipoprotein receptor-related protein 1; soluble

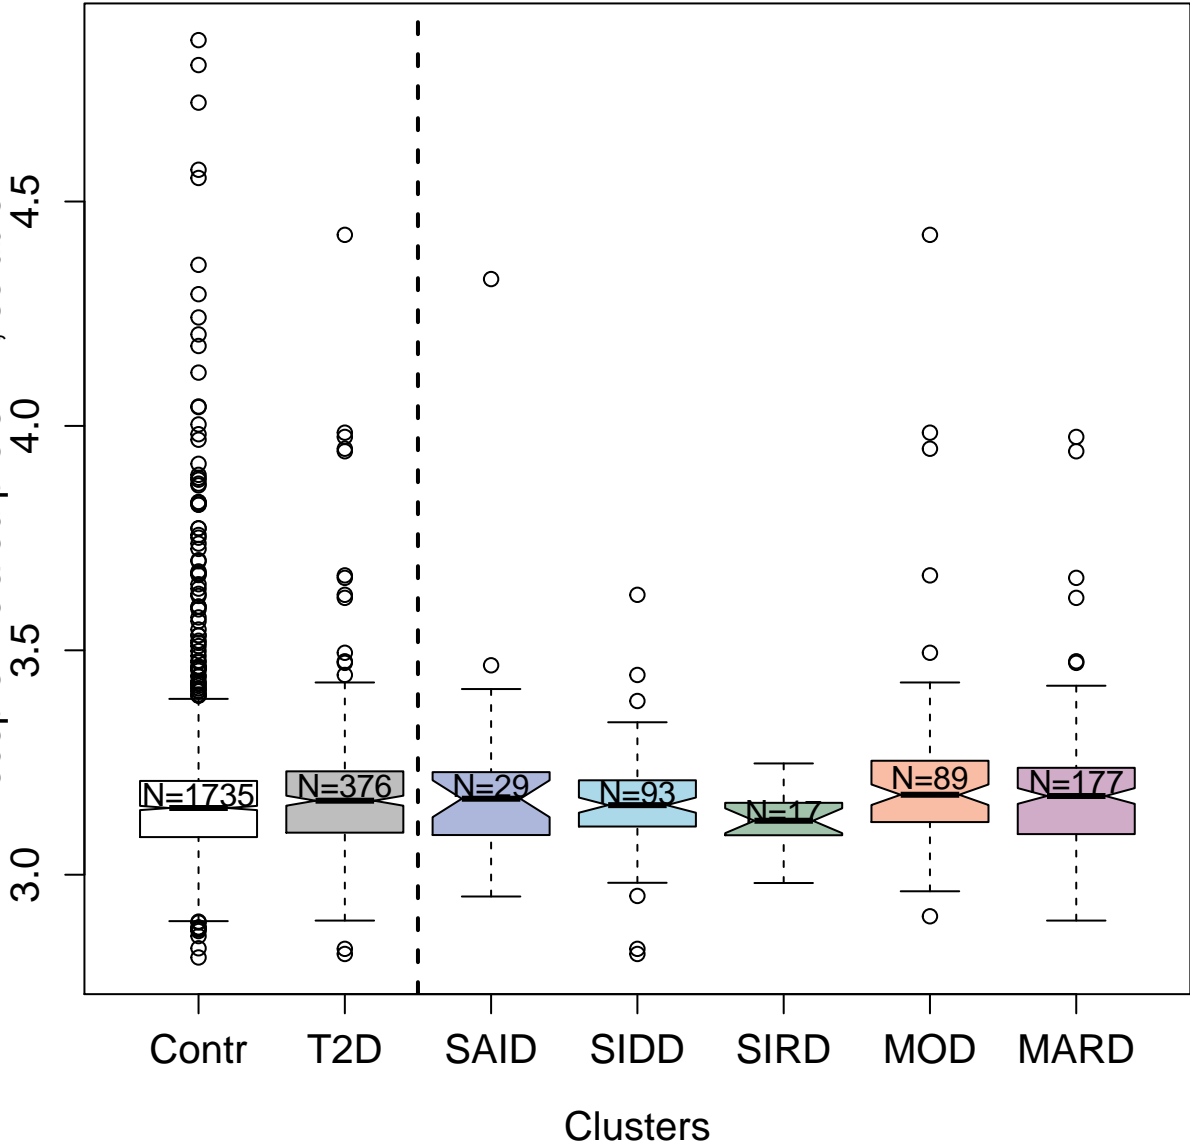

11104-13\_3 : Chitinase-3-like protein 1

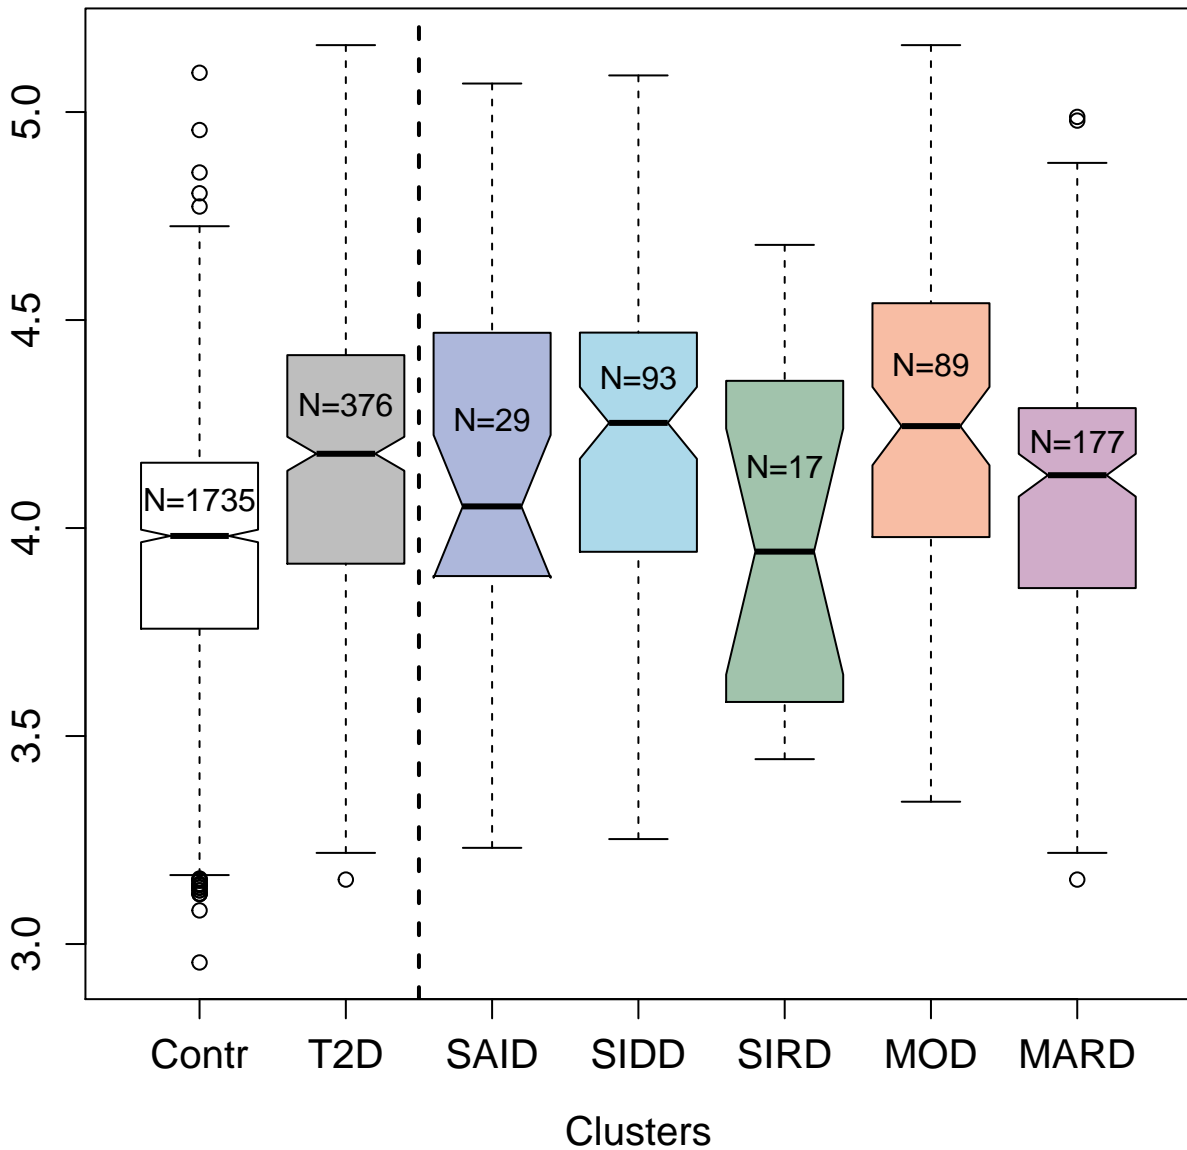

3007-7\_2 : Sialic acid-binding Ig-like lectin 9

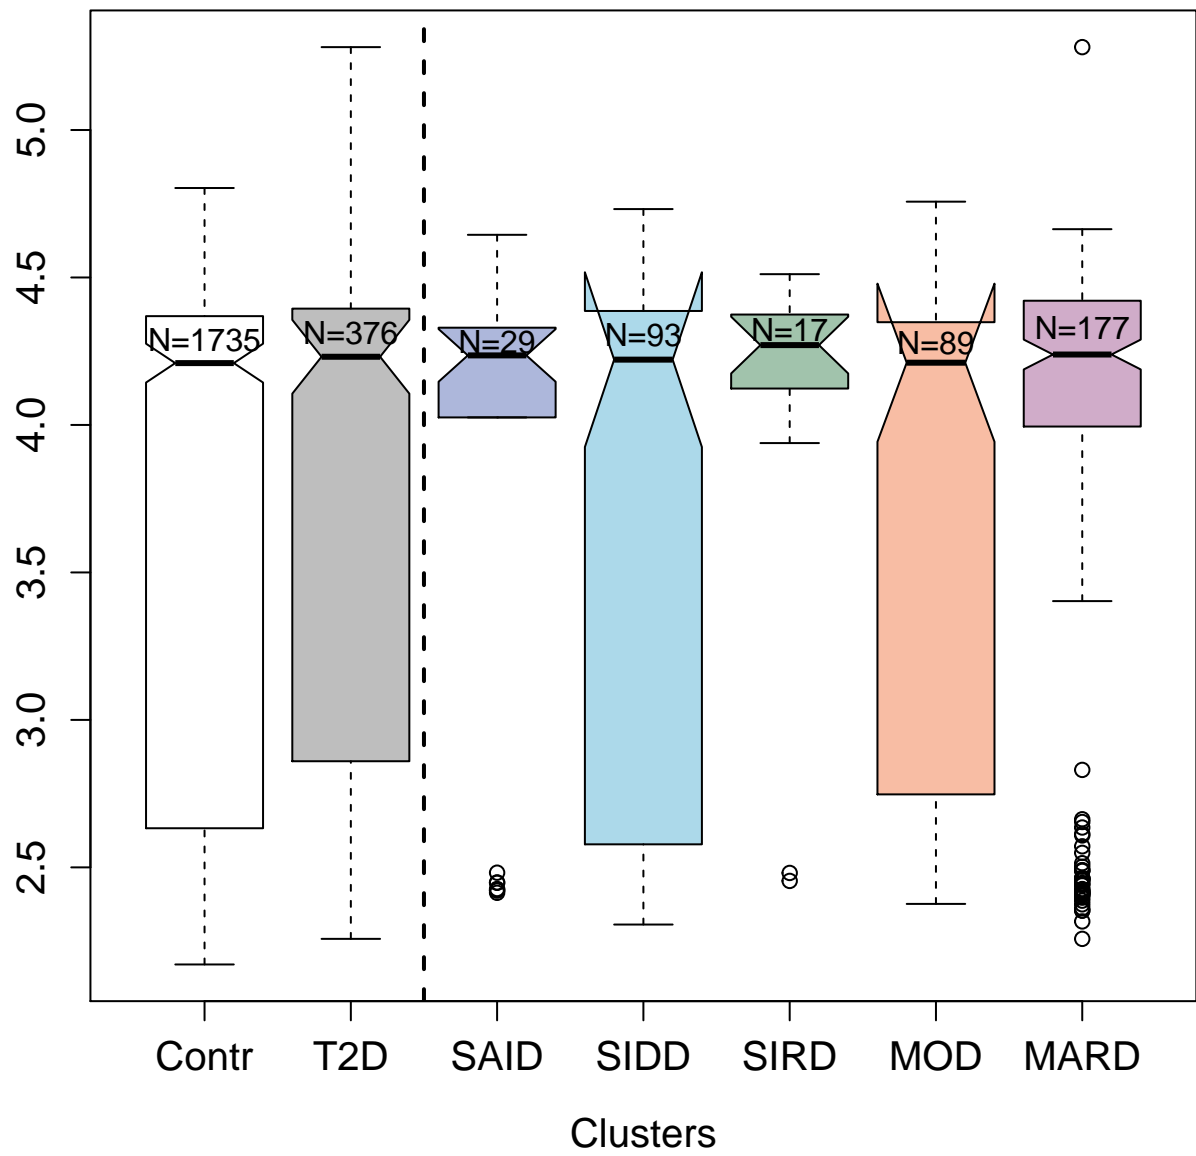



4535-50\_2 : ADP-ribosyl cyclase/cyclic ADP-ribose  
hydrolase 2

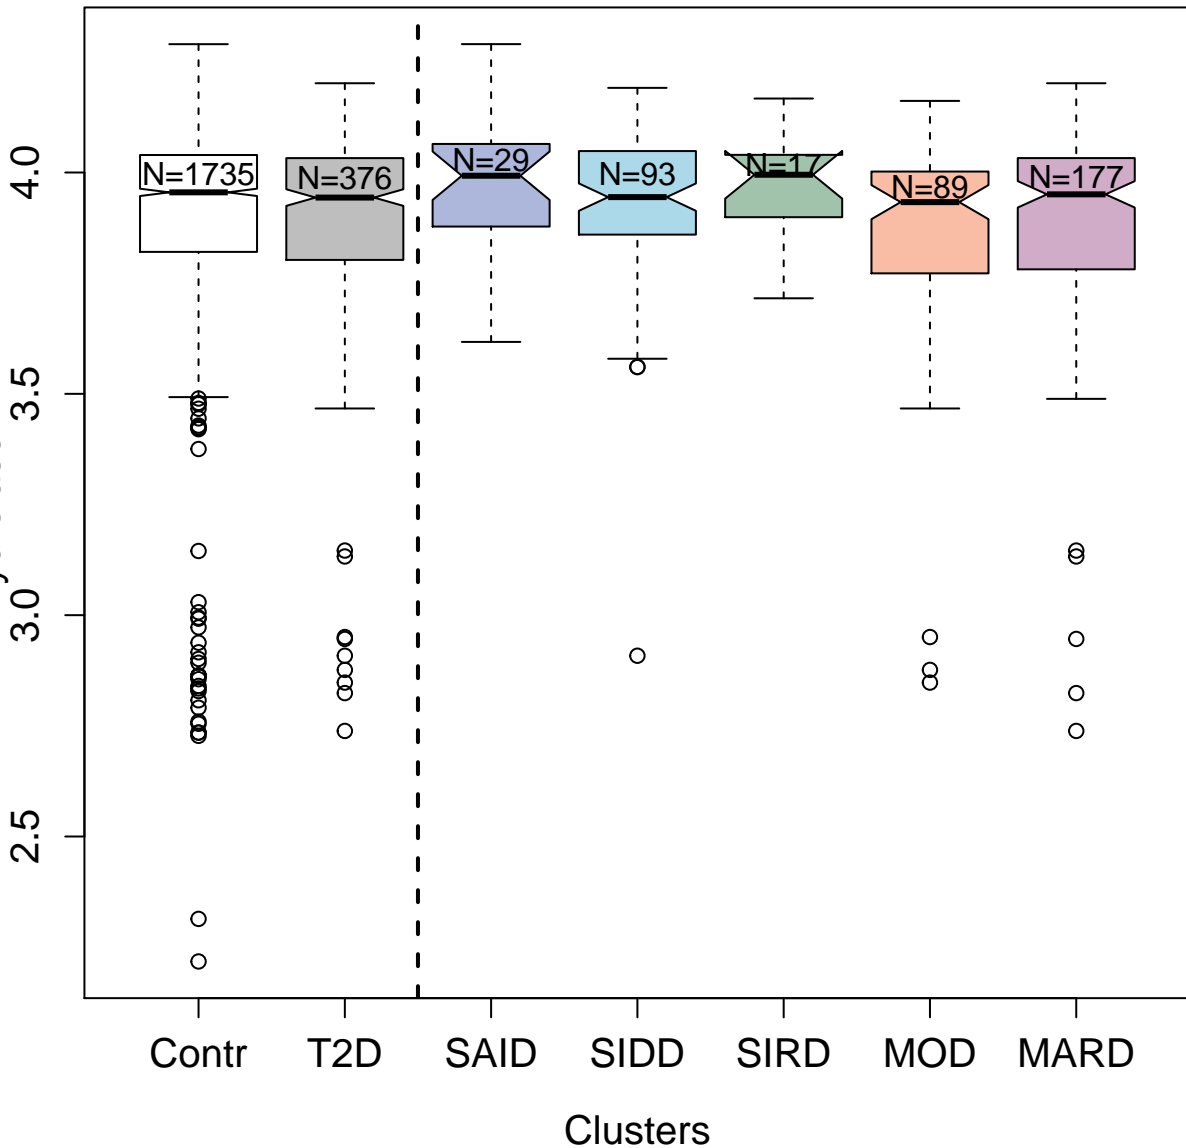

3684-78\_3 : Macrophage scavenger receptor types I and II

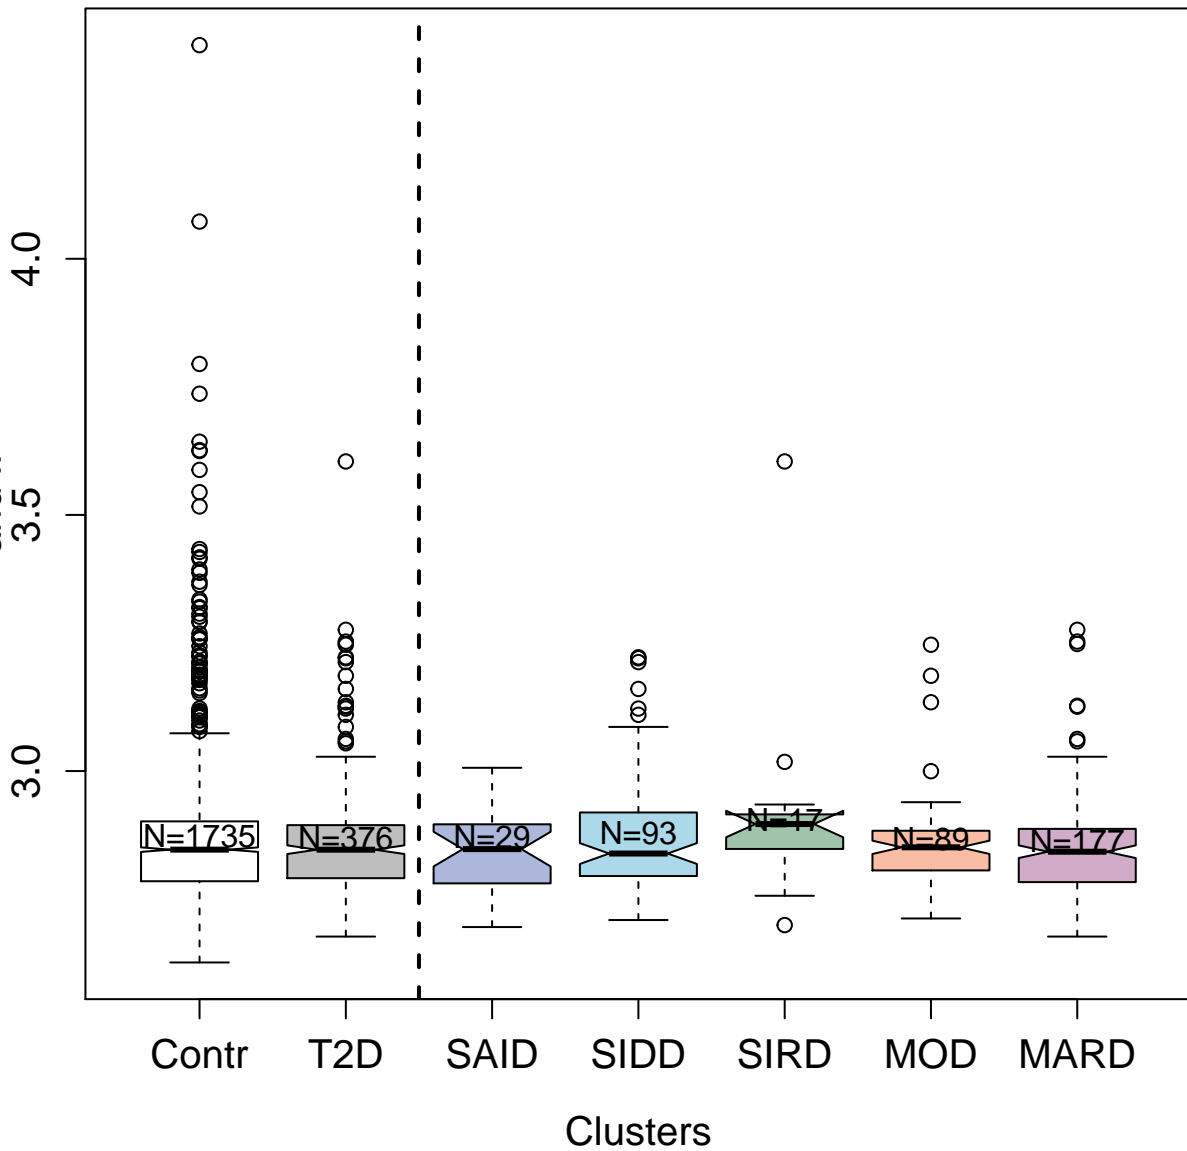

5921-58\_3 : Protein S100-A7

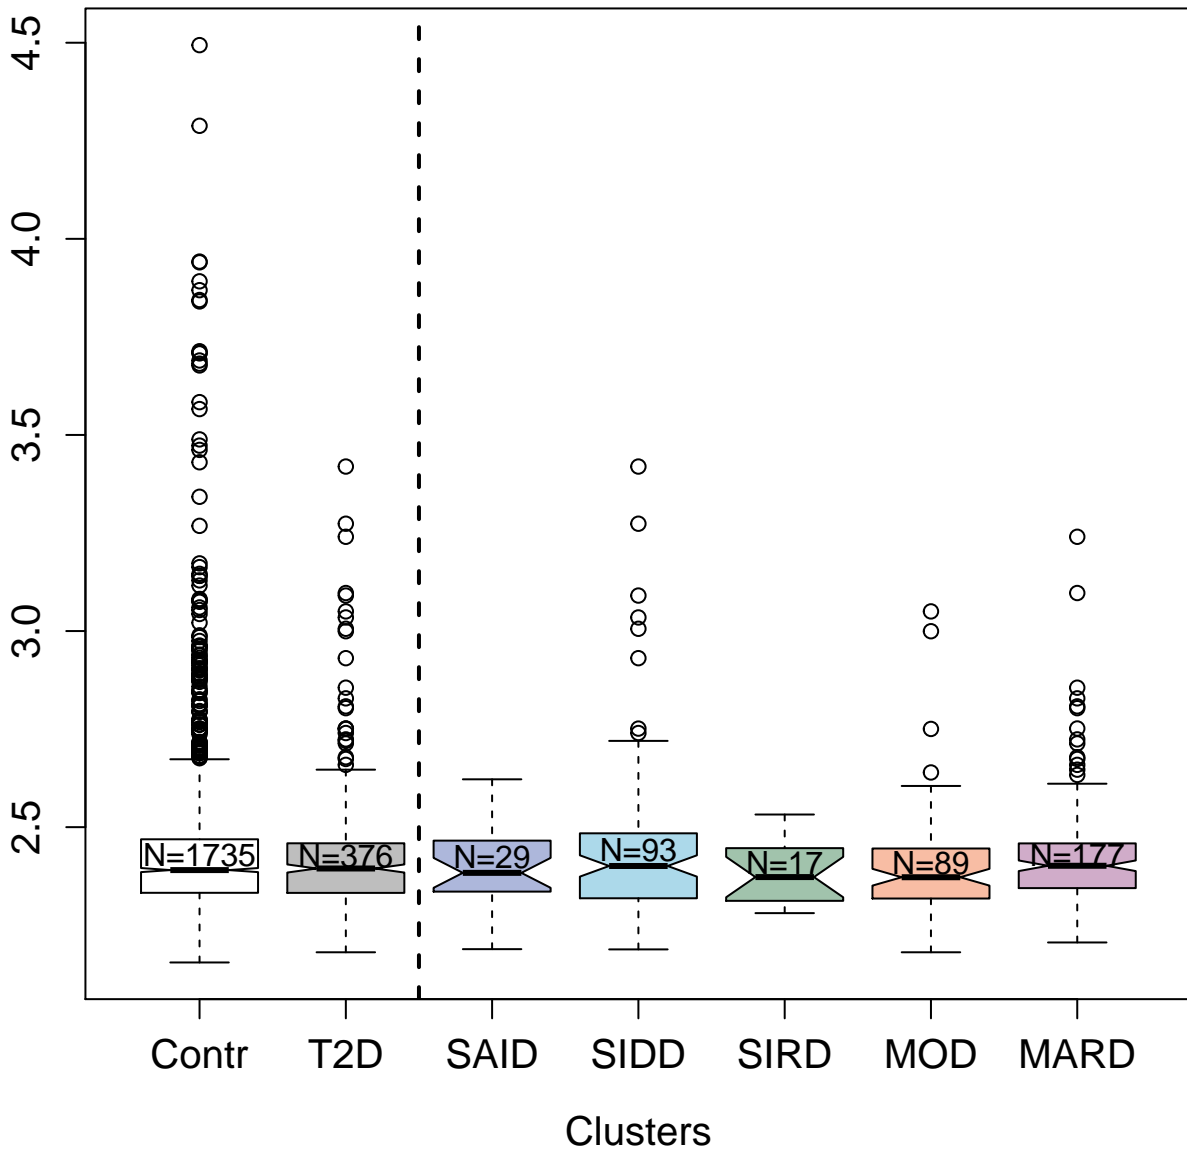

3204-2\_2 : Leukotriene A-4 hydrolase

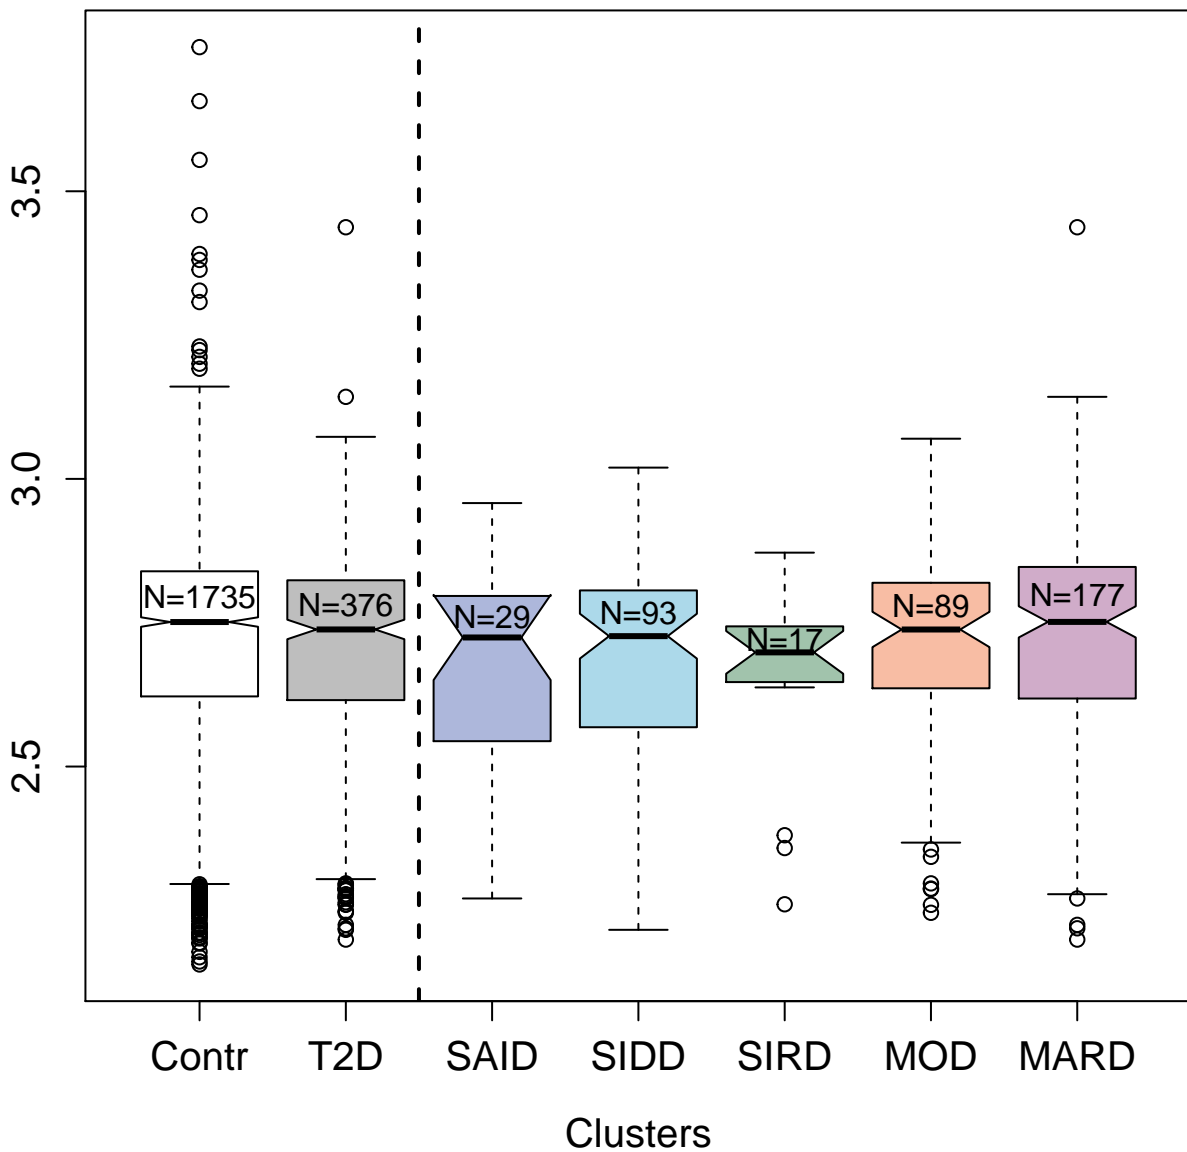

3143-3\_1 : T-cell surface glycoprotein CD4

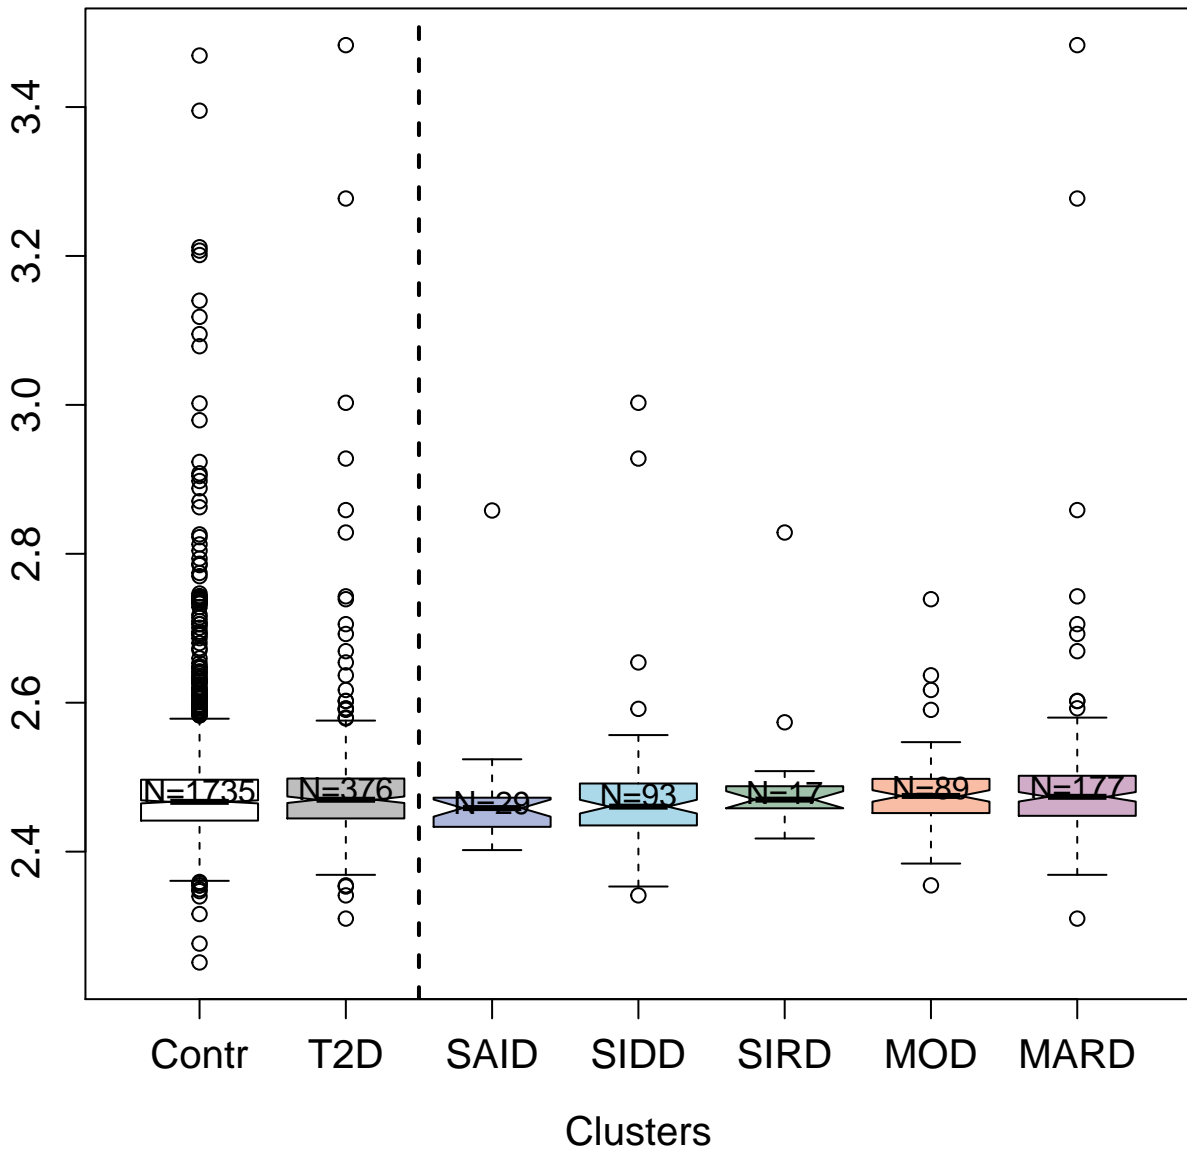

2769-3\_2 : Protein Rev\_HV2BE

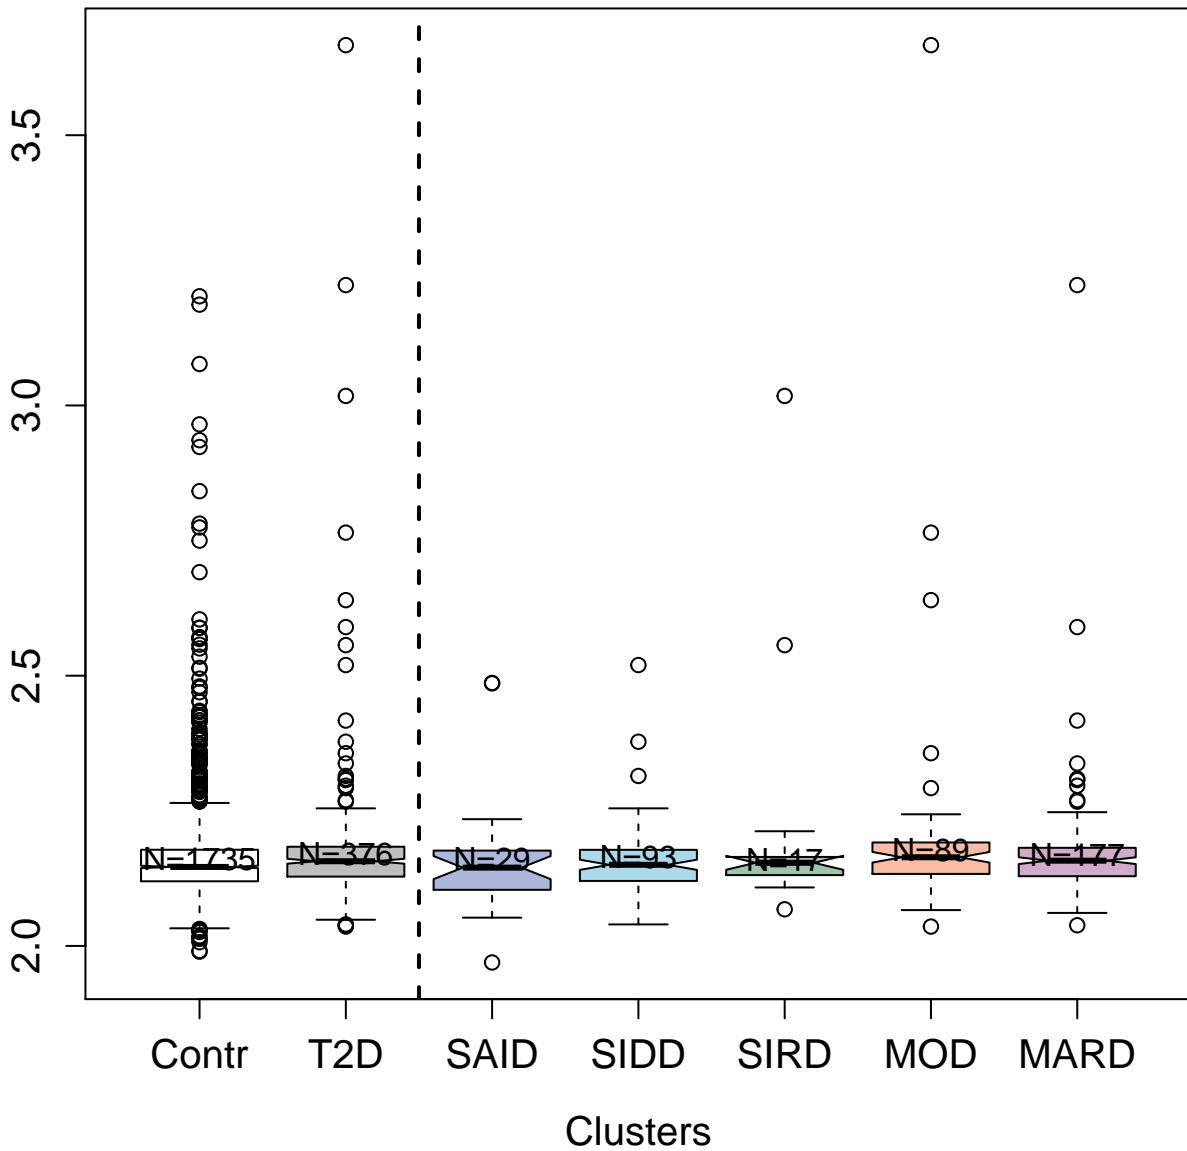

2770-51\_2 : C-C motif chemokine 1

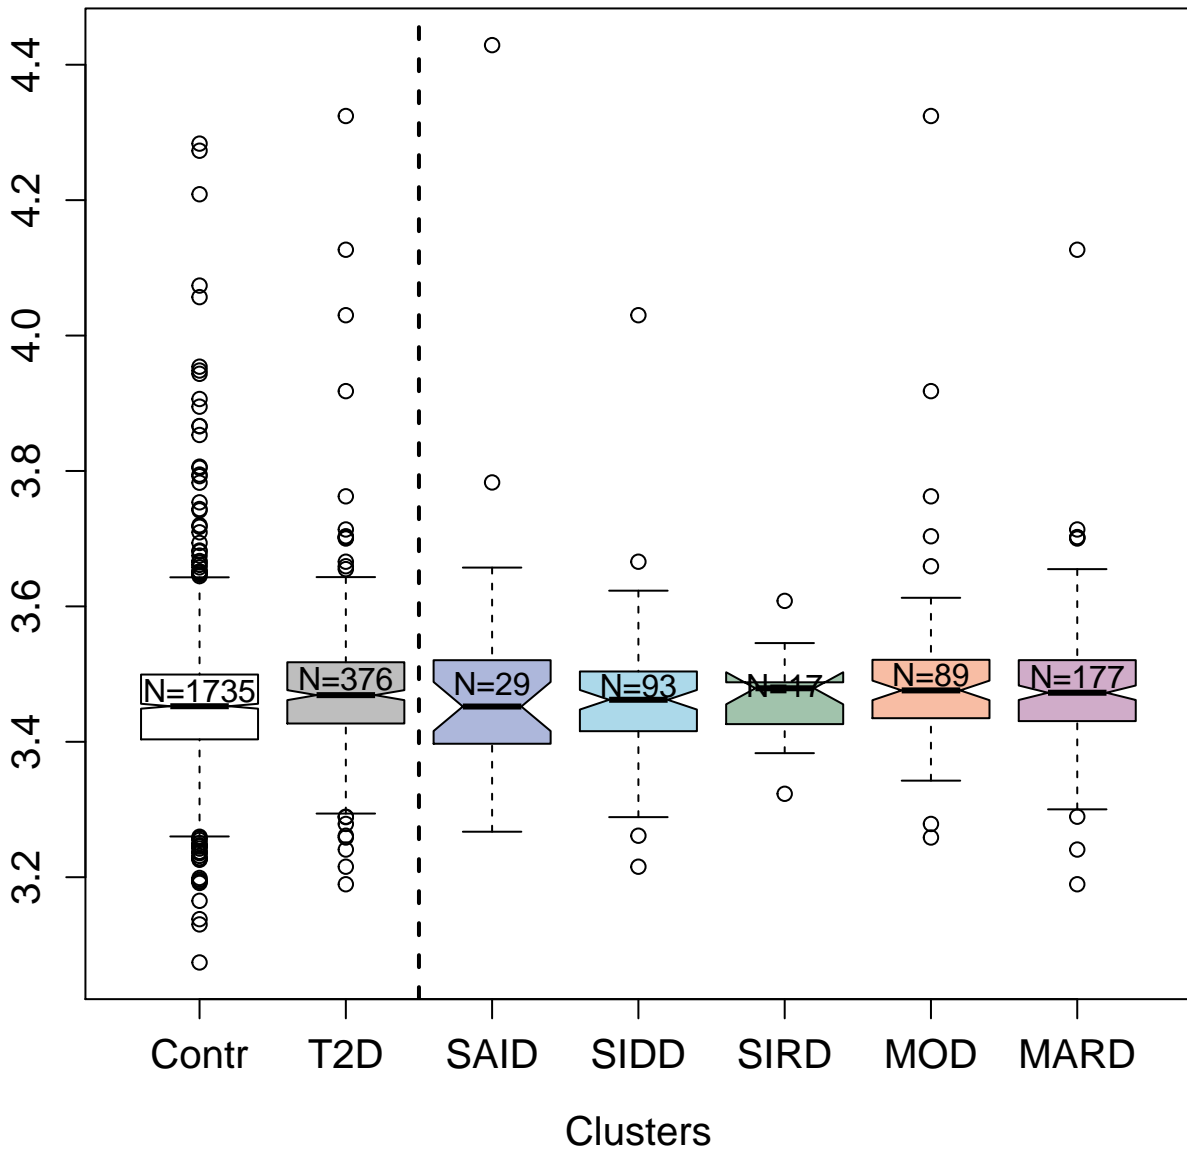

10358-33\_3 : Induced myeloid leukemia cell  
differentiation protein Mcl-1

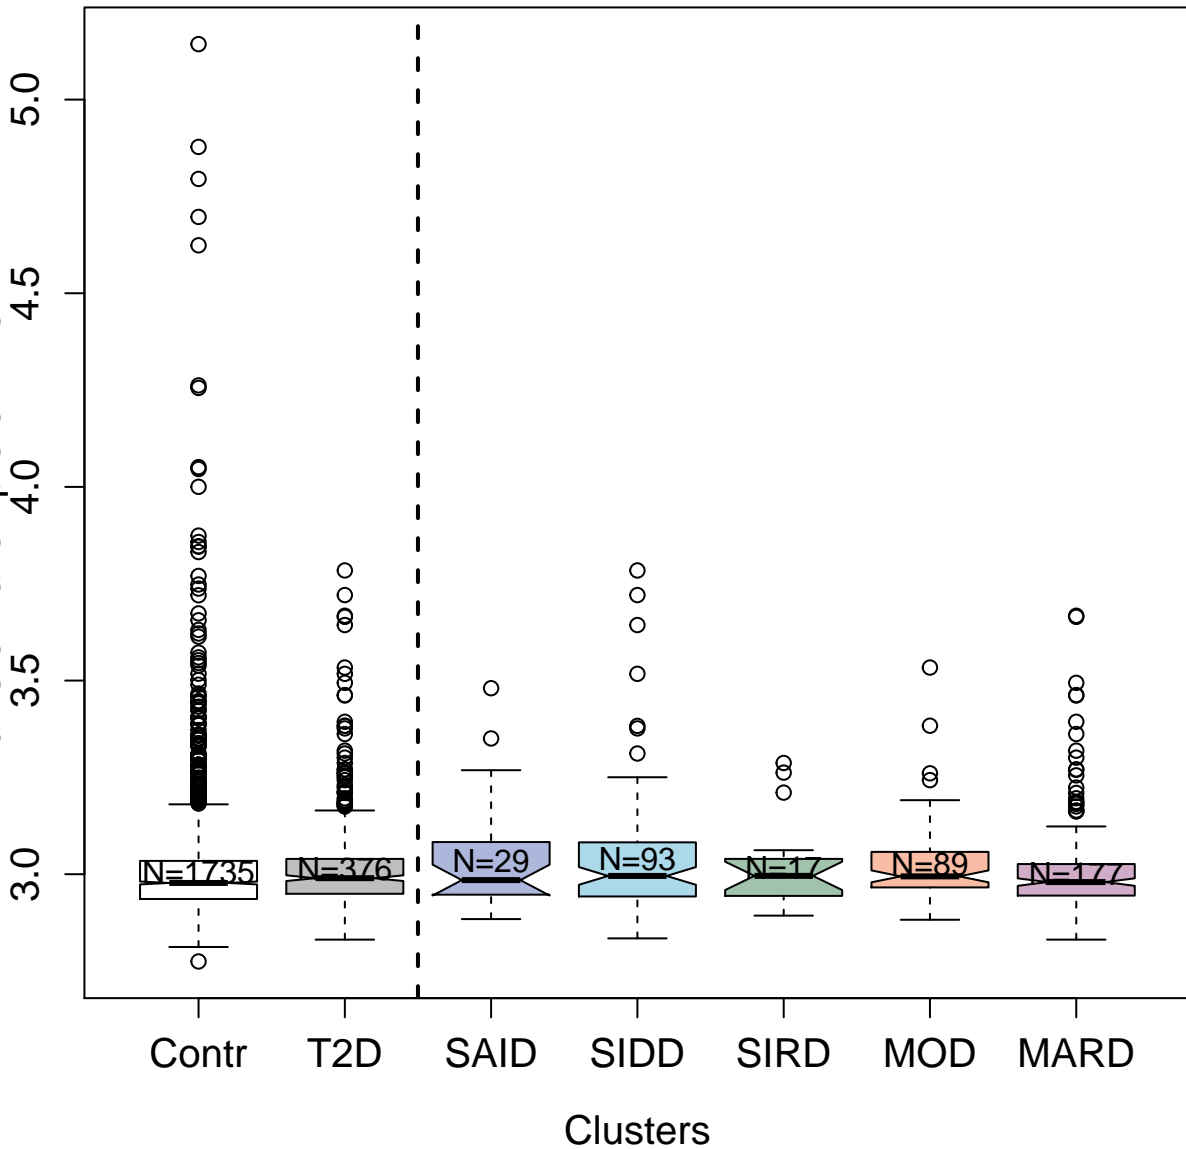



2783-18\_2 : C-C motif chemokine 3-like 1

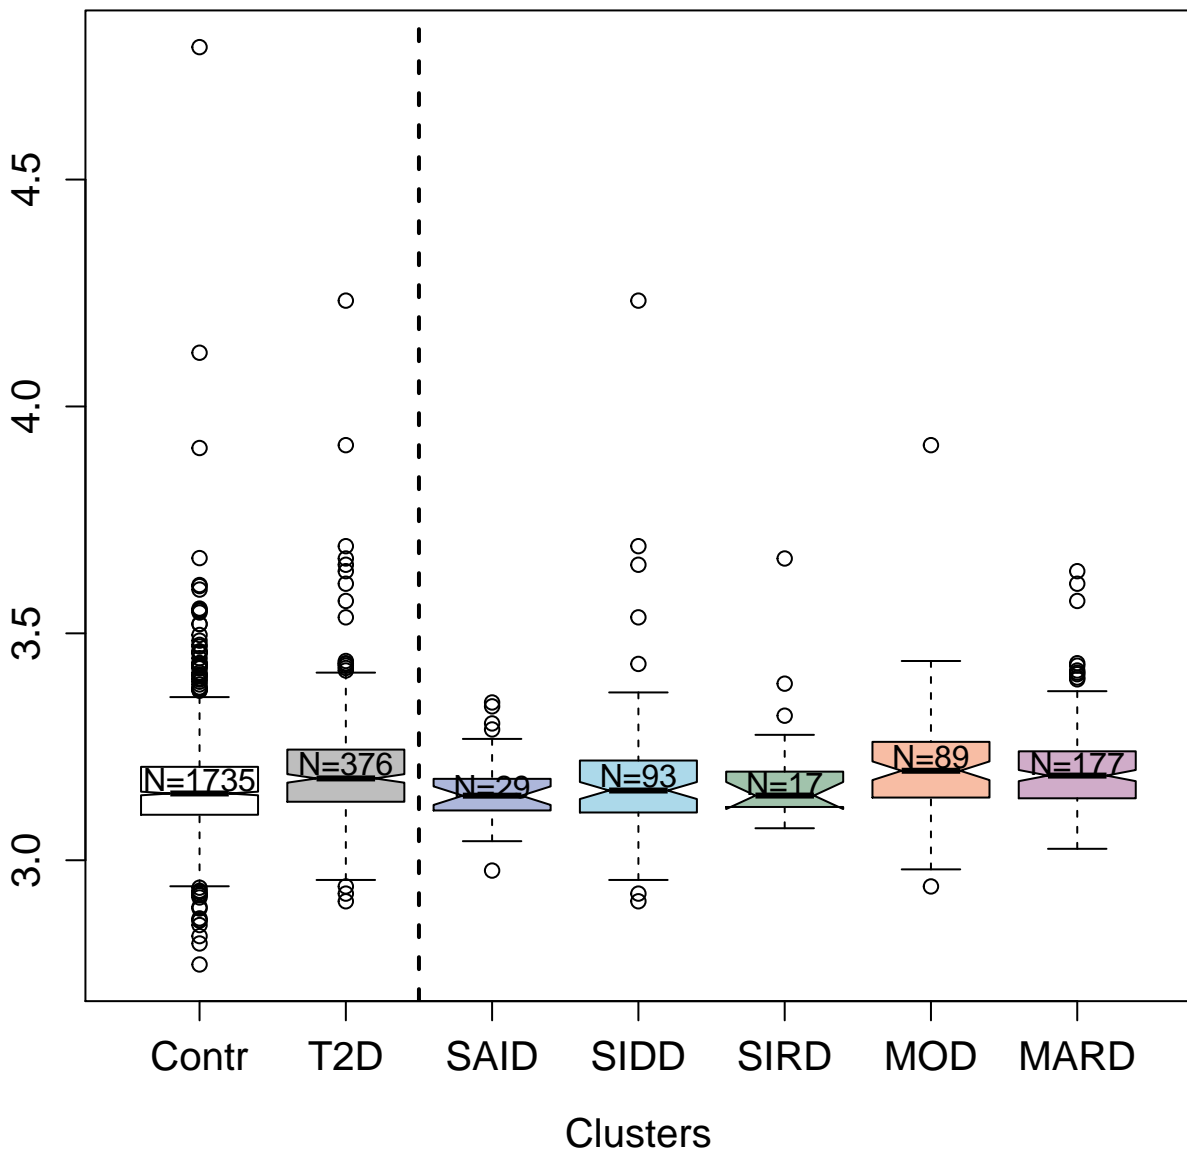

2960-66\_2 : Properdin

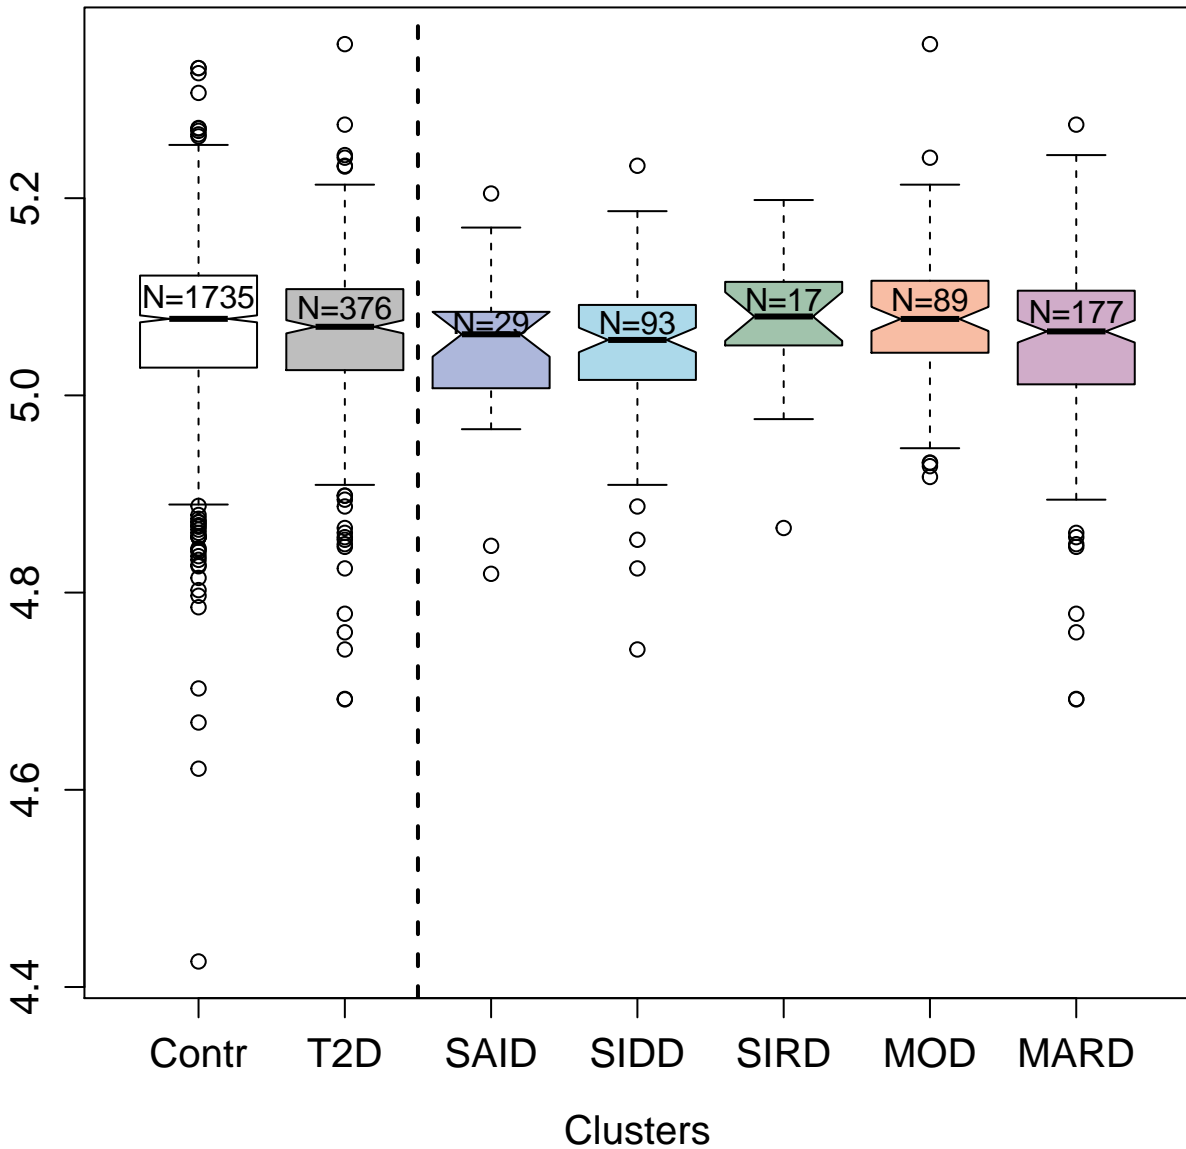

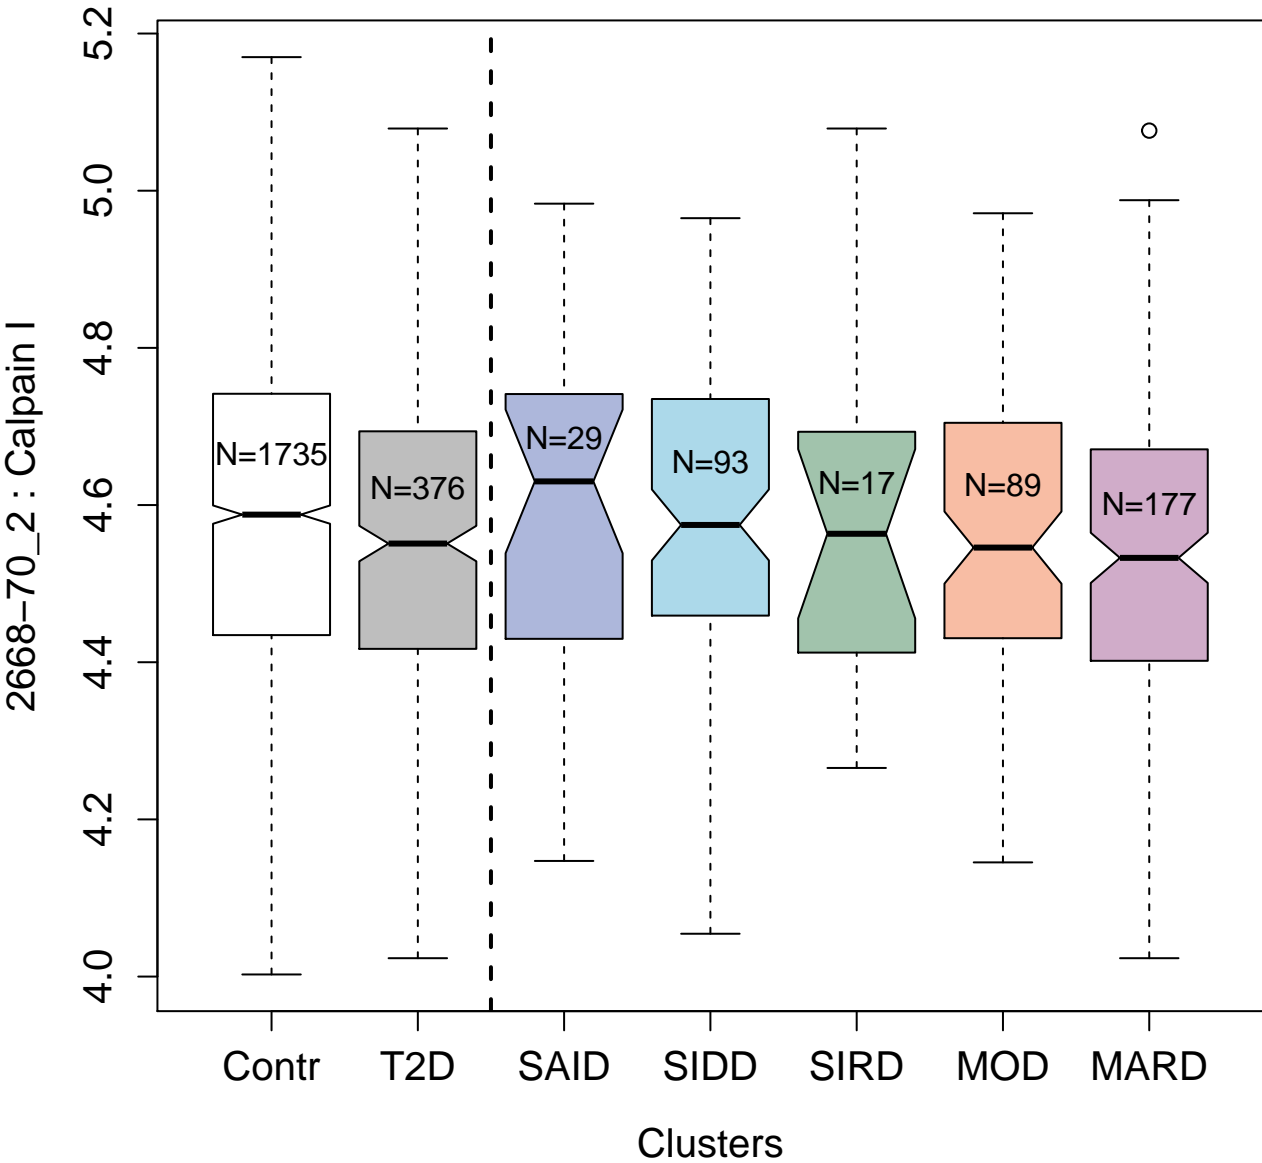

# 8470-213\_3 : Ribonuclease H1

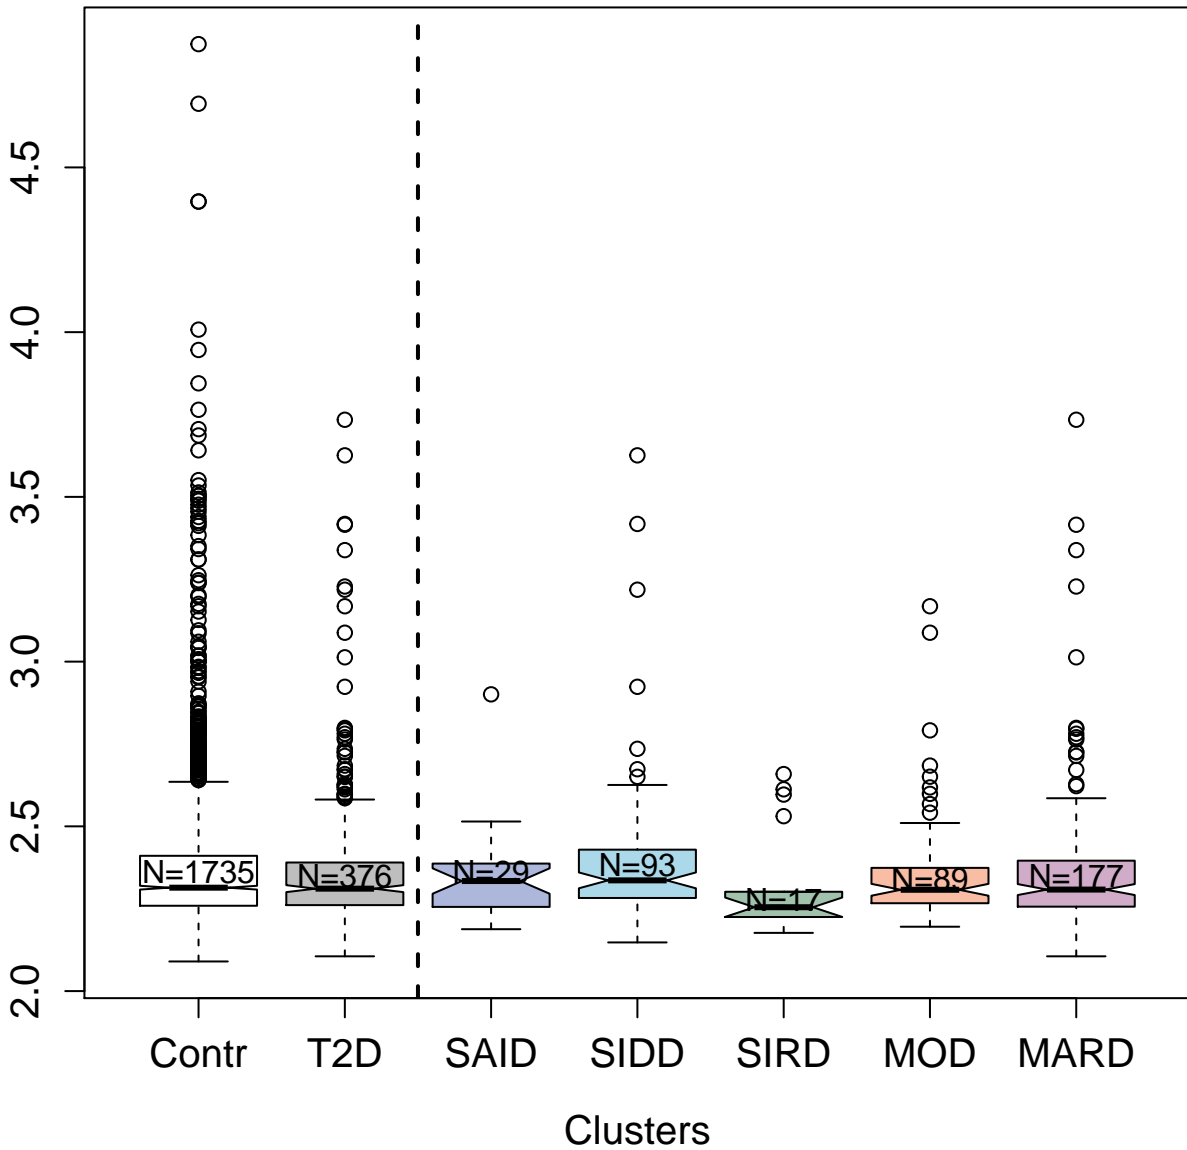

11105-171\_3 : Alpha-enolase

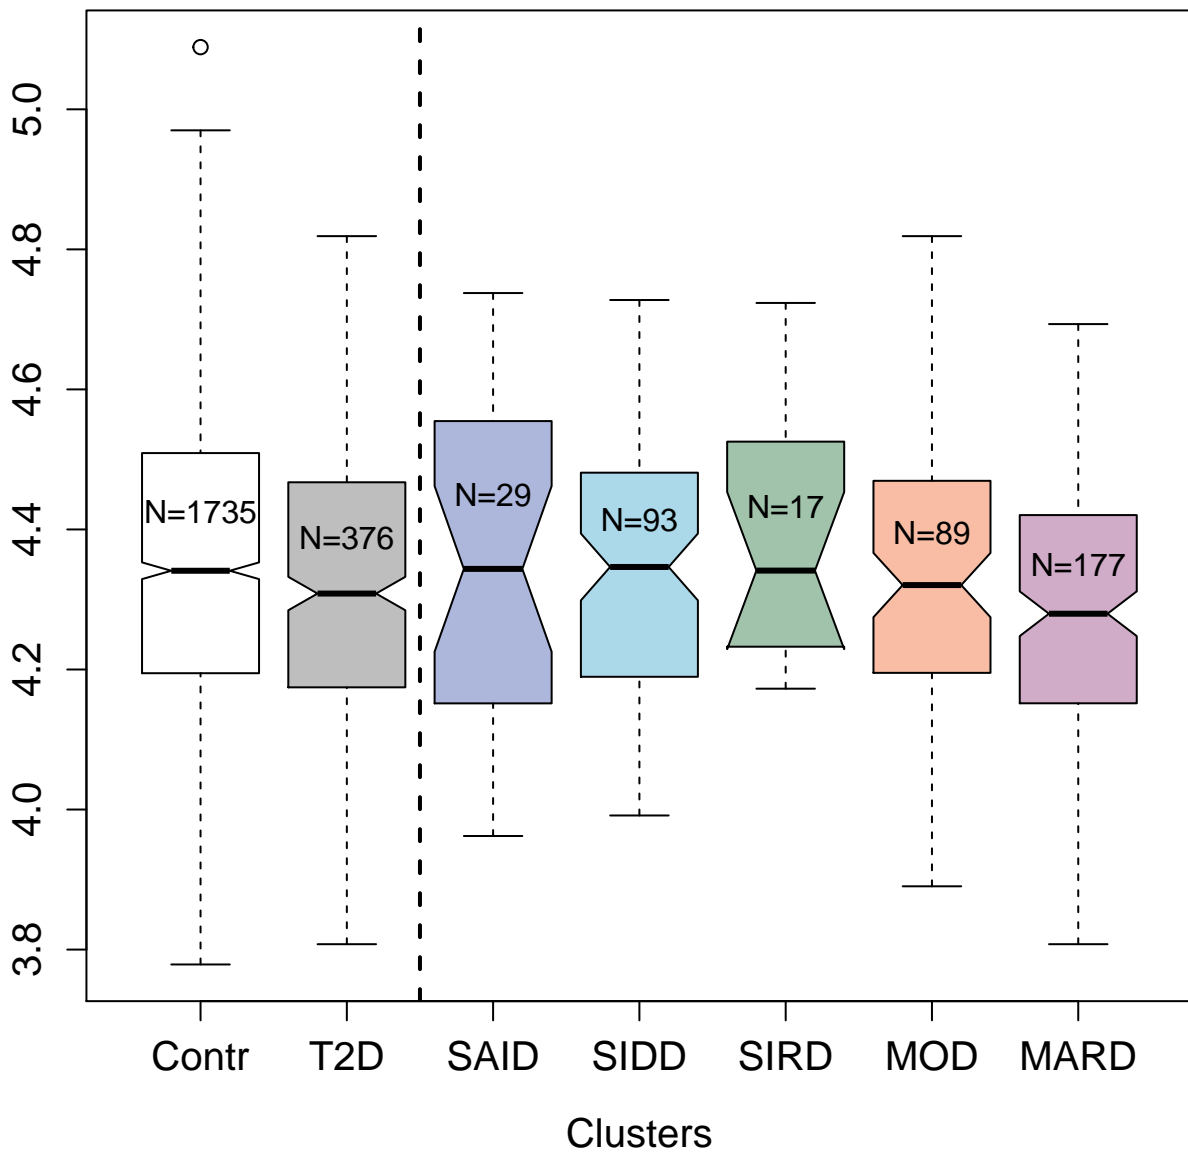

5864-10\_3 : Fructose-bisphosphate aldolase A

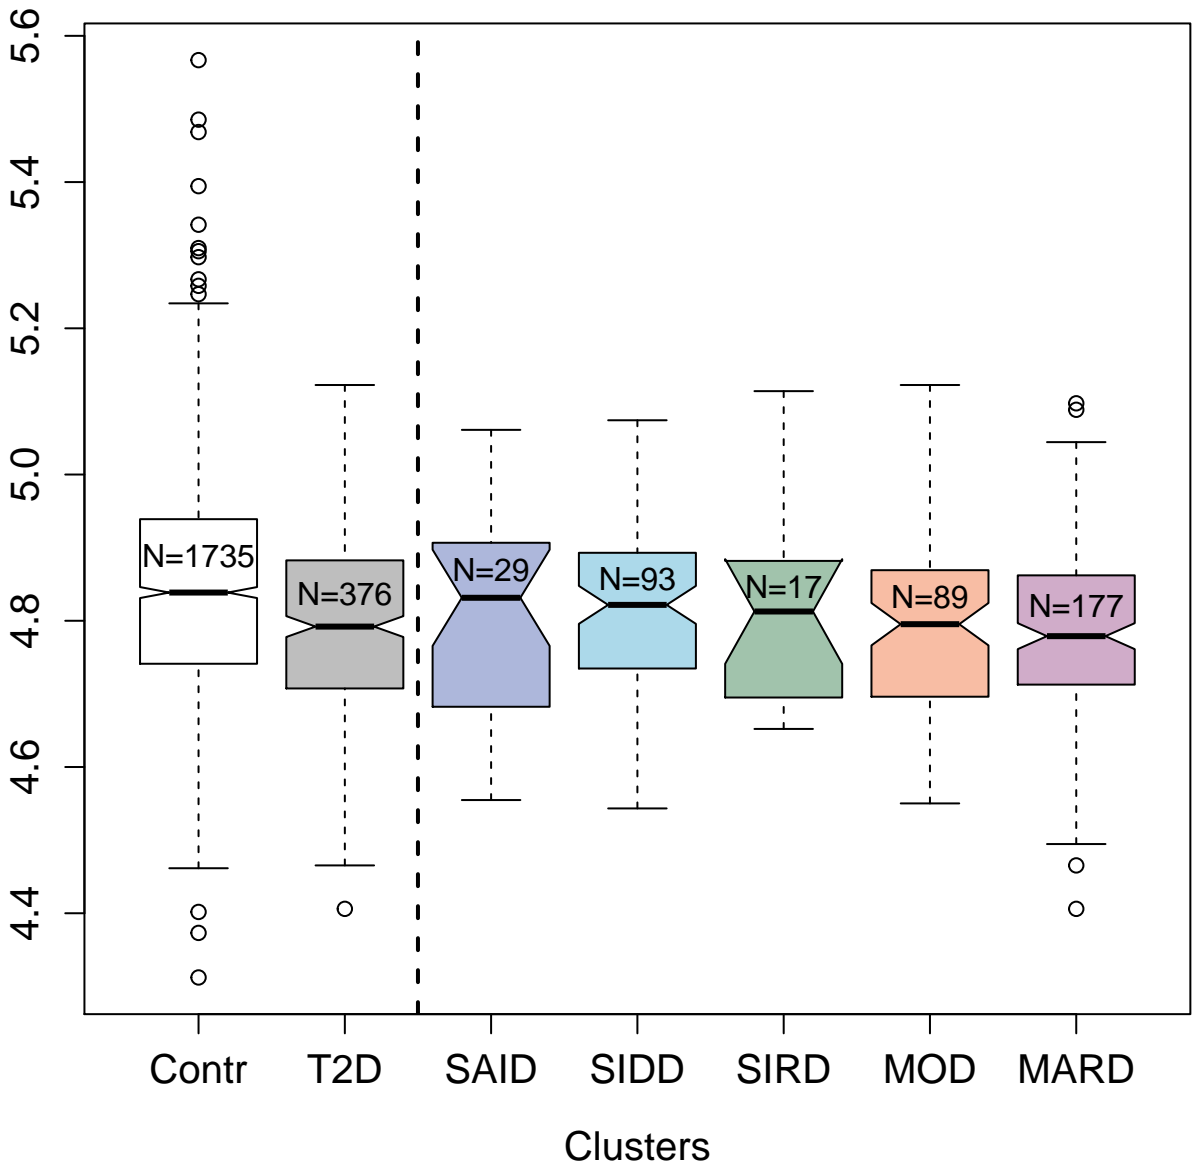

3449-58\_2 : Kallistatin

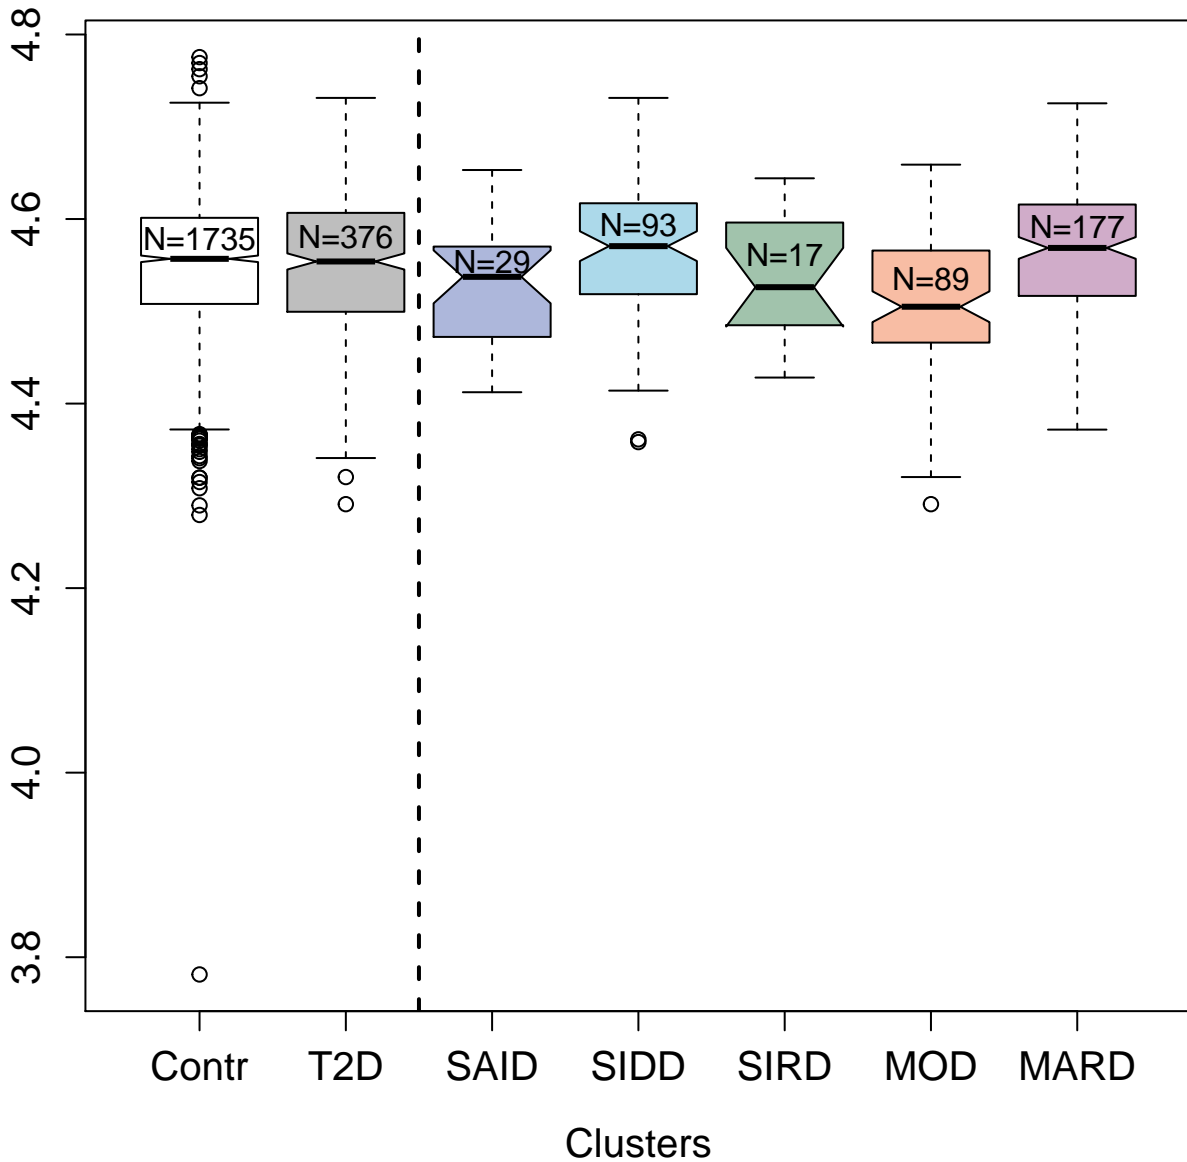

4282-3\_2 : GTP-binding nuclear protein Ran

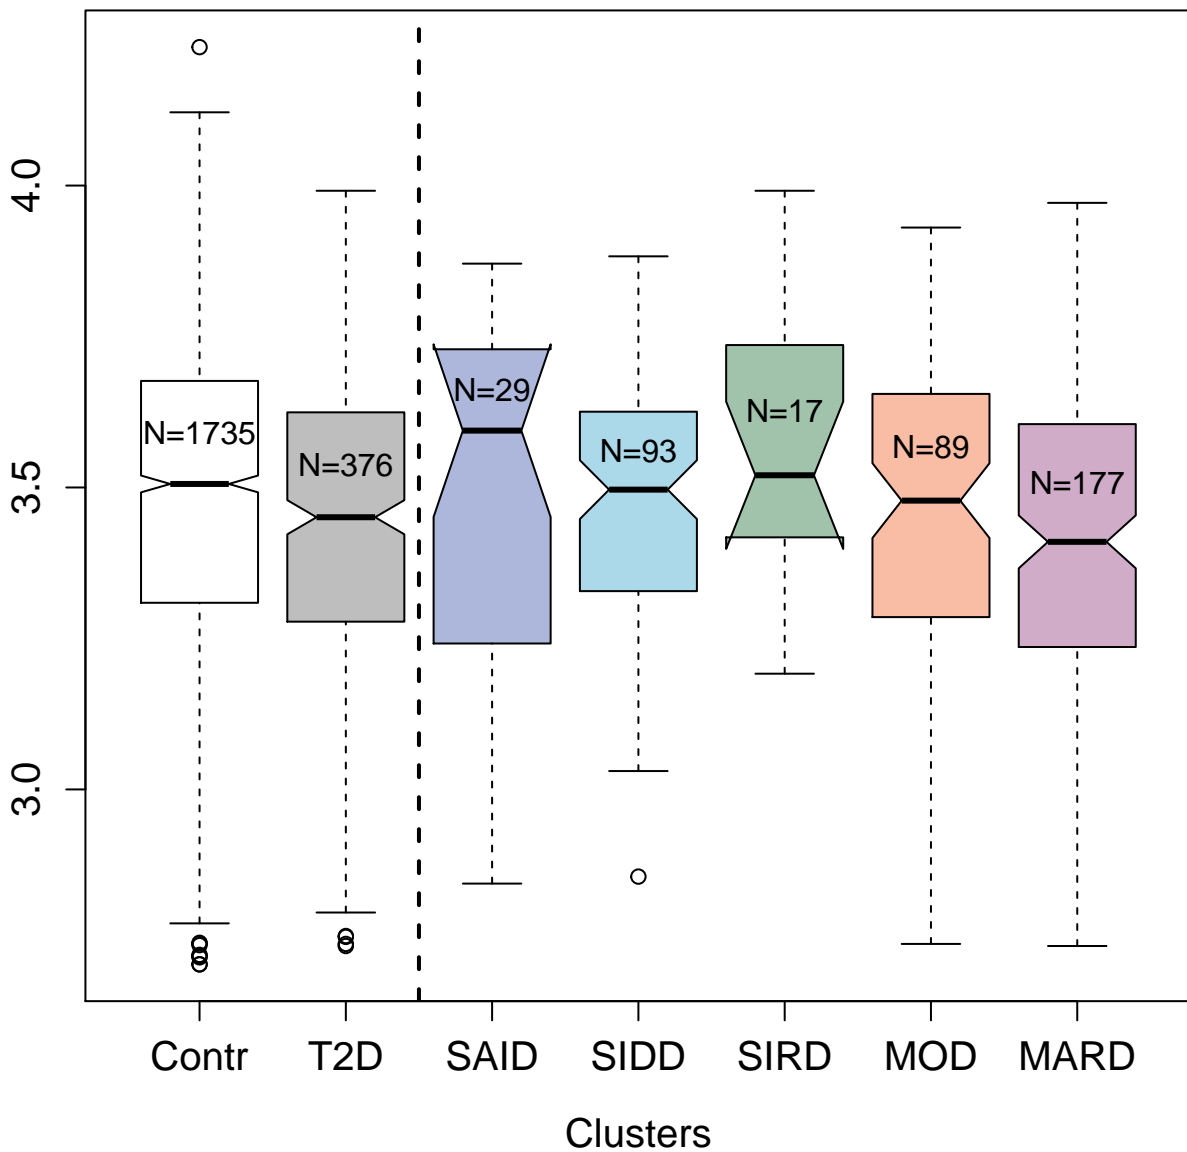



3194-36\_2 : Platelet glycoprotein VI

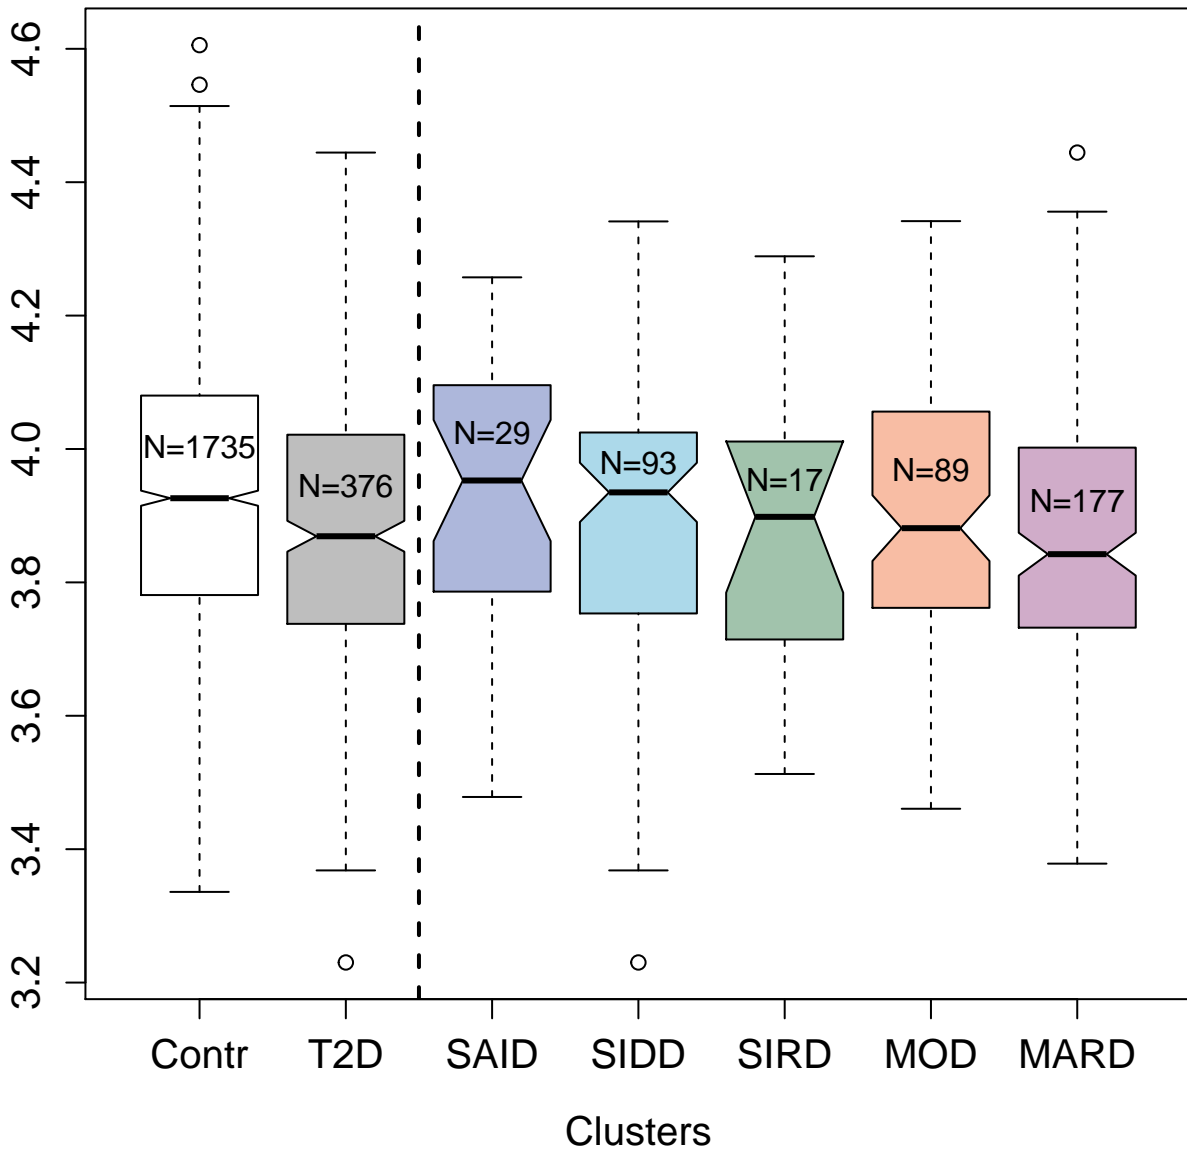

2937-10\_2 : Apolipoprotein E (isoform E3)

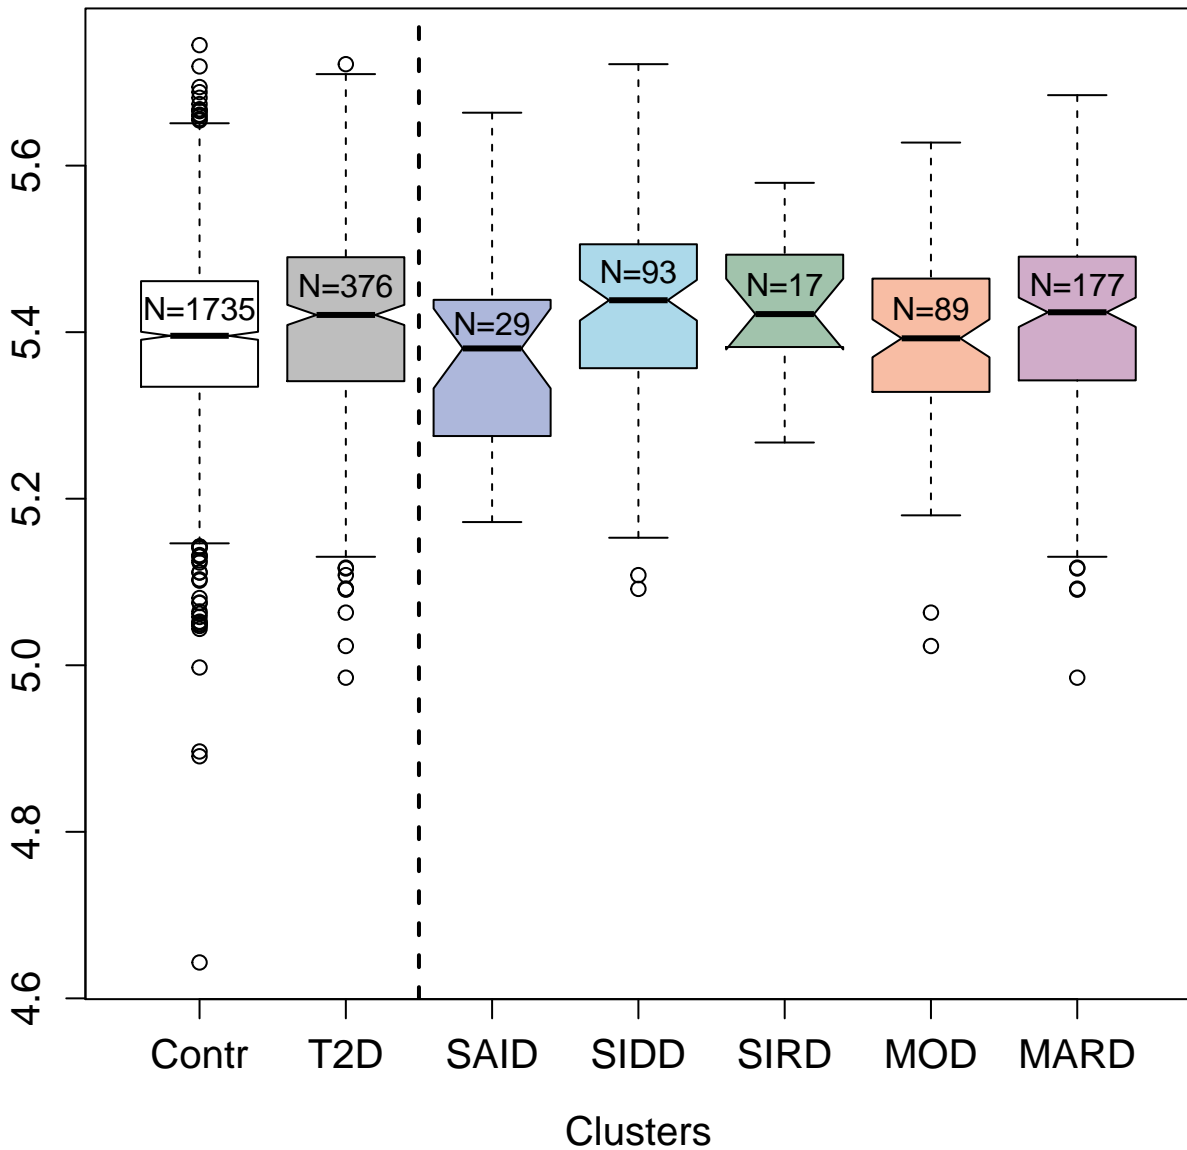

3091-70\_2 : Aurora kinase A

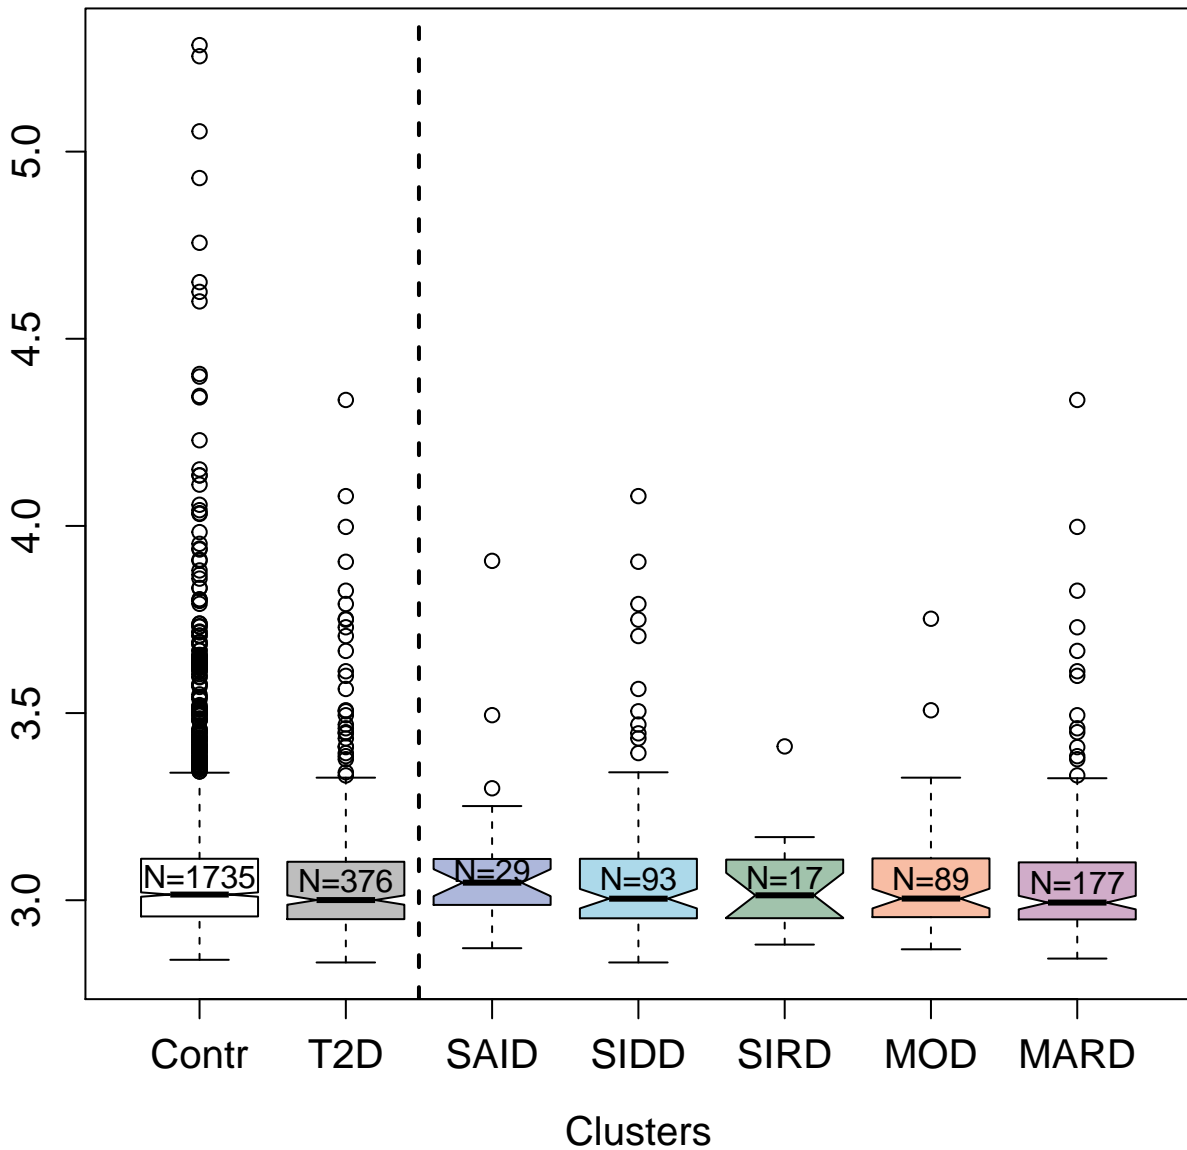

4234-8\_2 : Interleukin-1 receptor-like 1

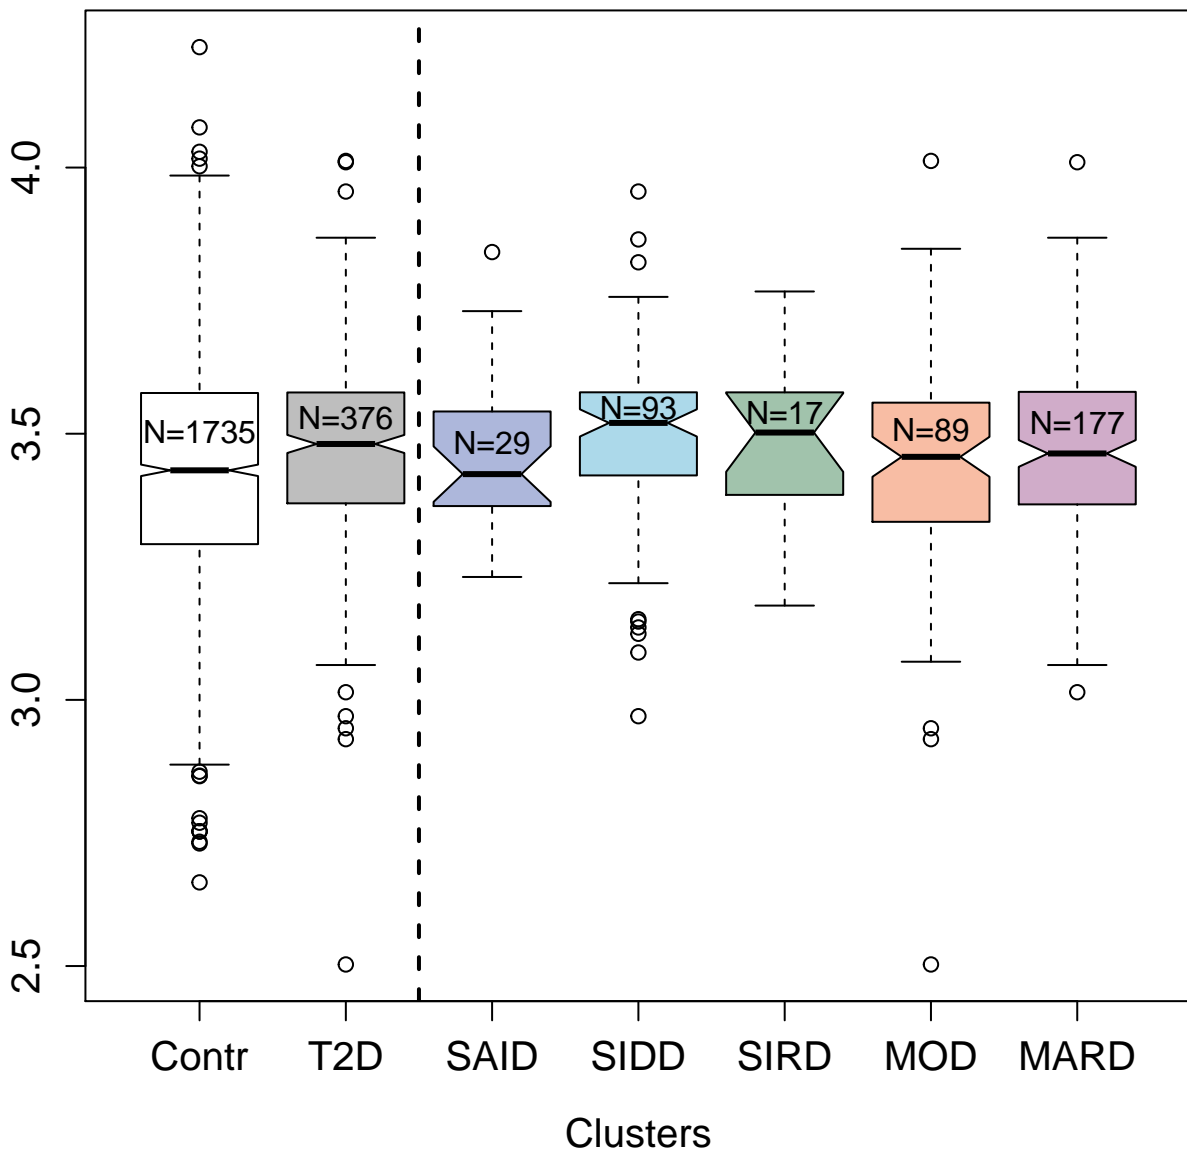

3289-19\_2 : Carbonic anhydrase-related protein 10

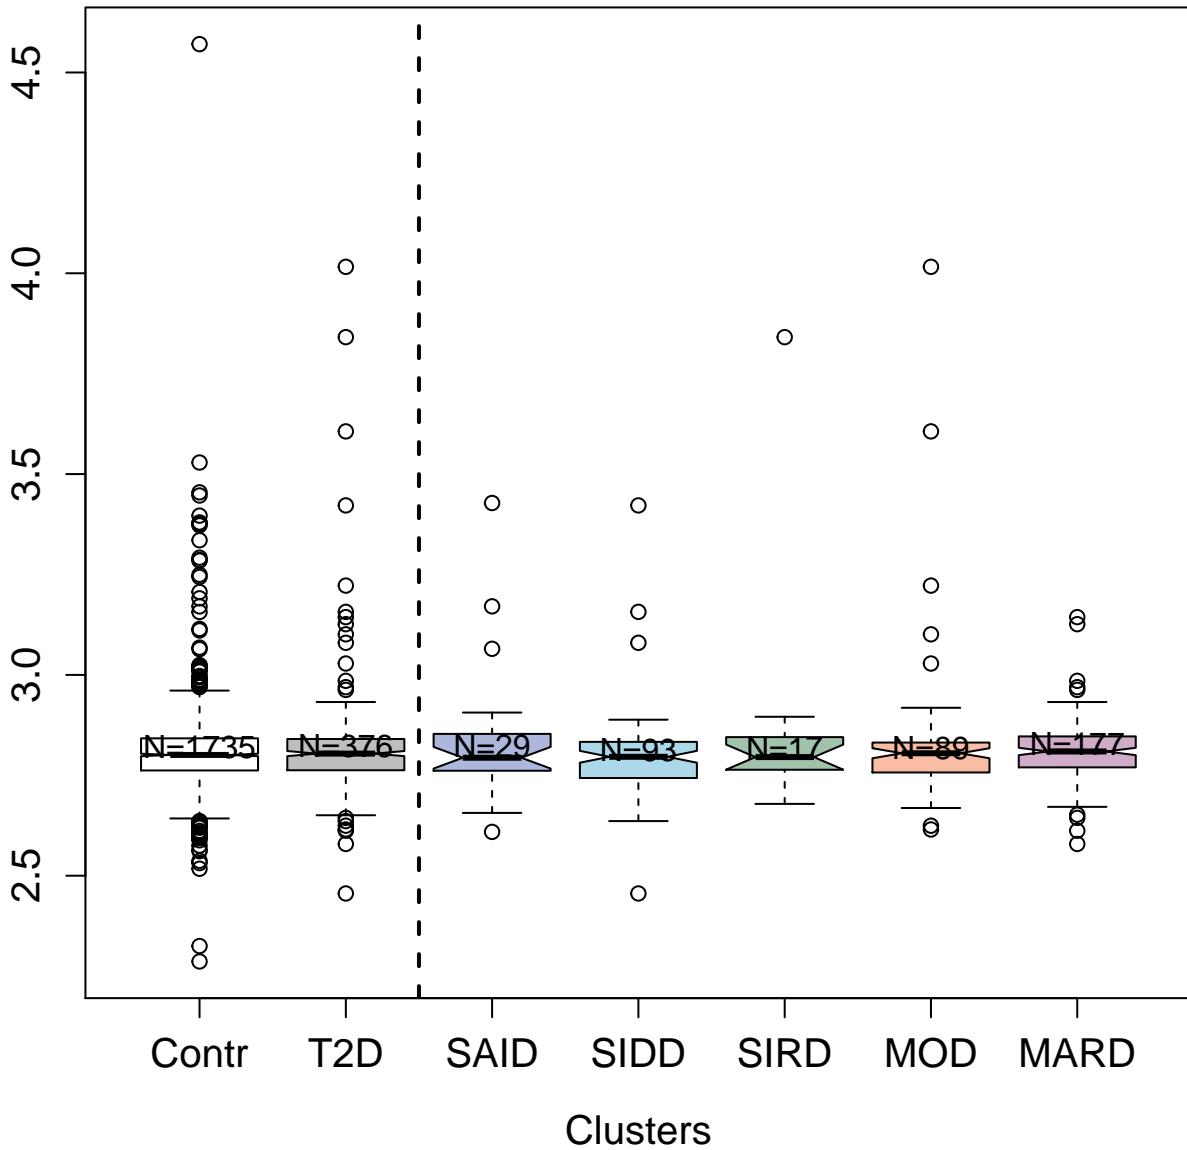

5383-14\_3 : Tumor necrosis factor receptor  
superfamily member 13C

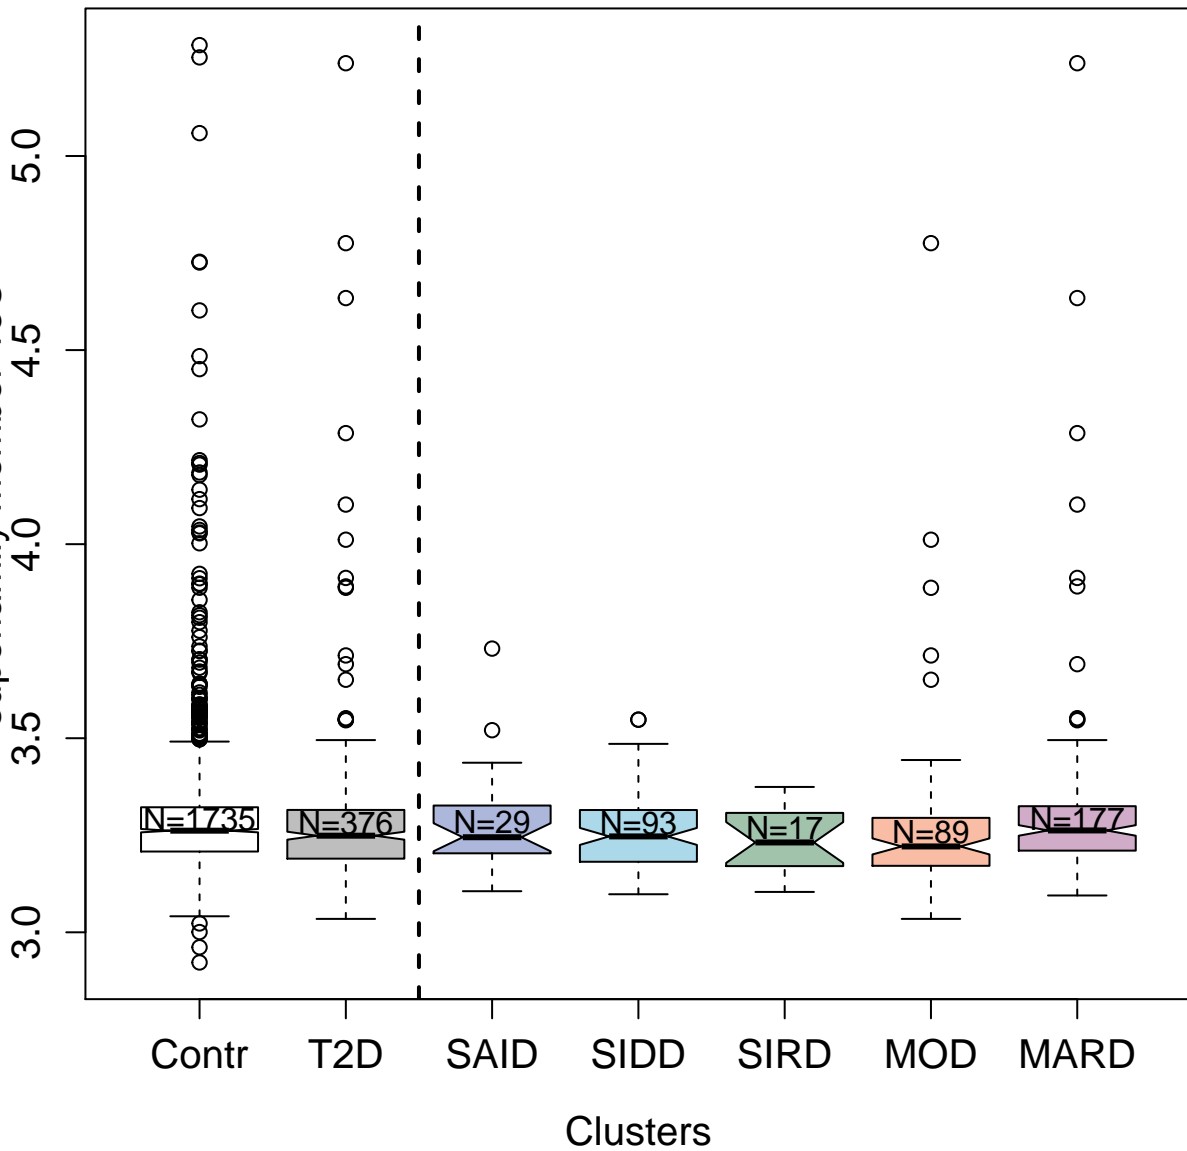

5486-73\_3 : Intercellular adhesion molecule 2

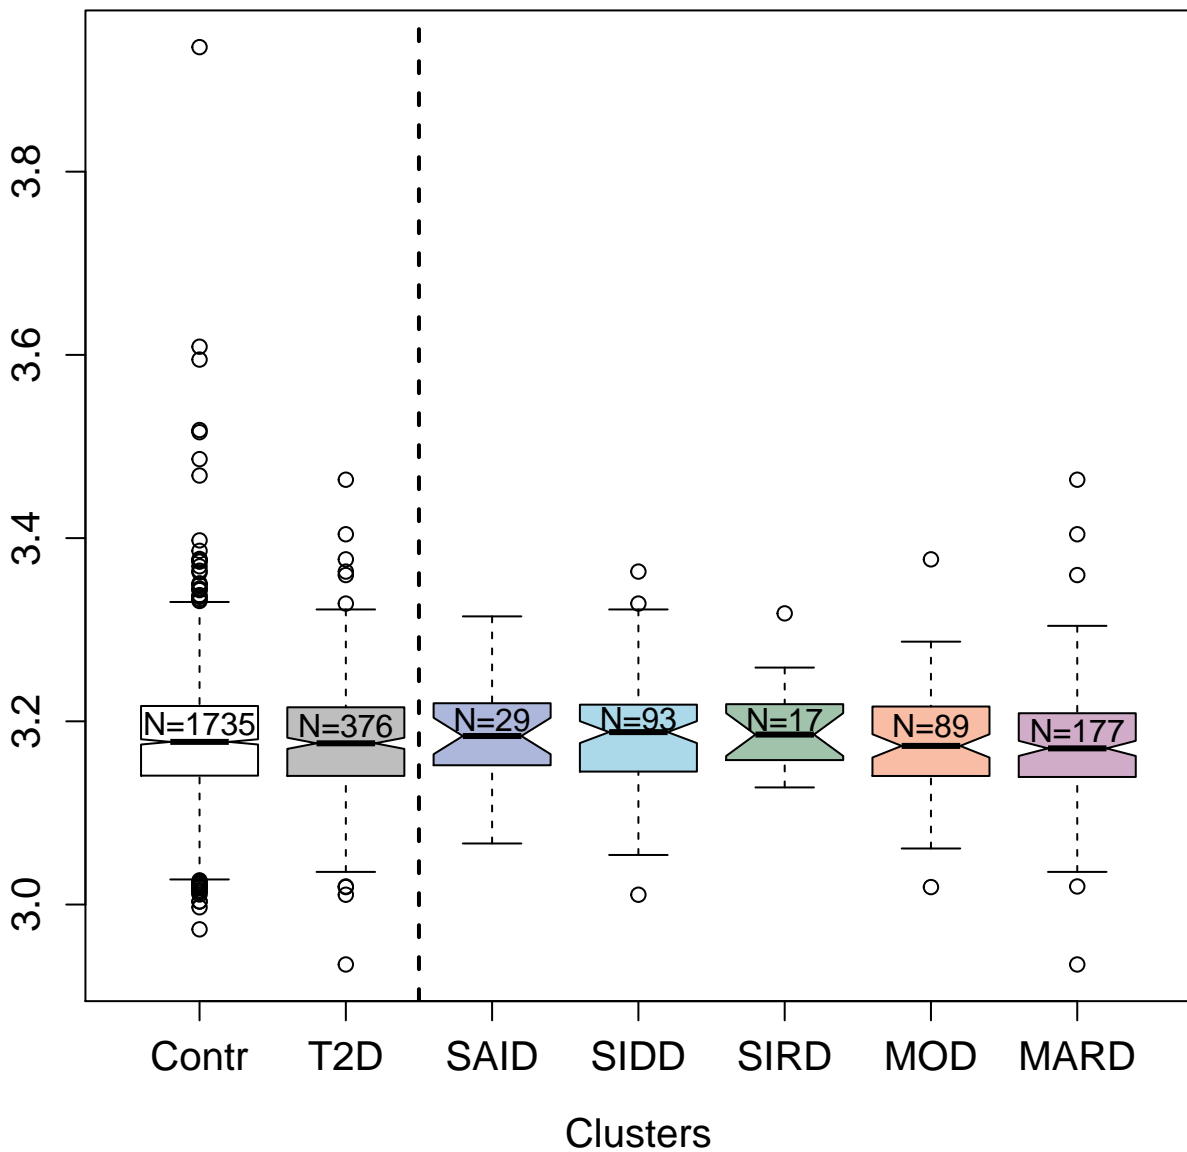

5352-11\_3: Tumor necrosis factor receptor  
superfamily member 14

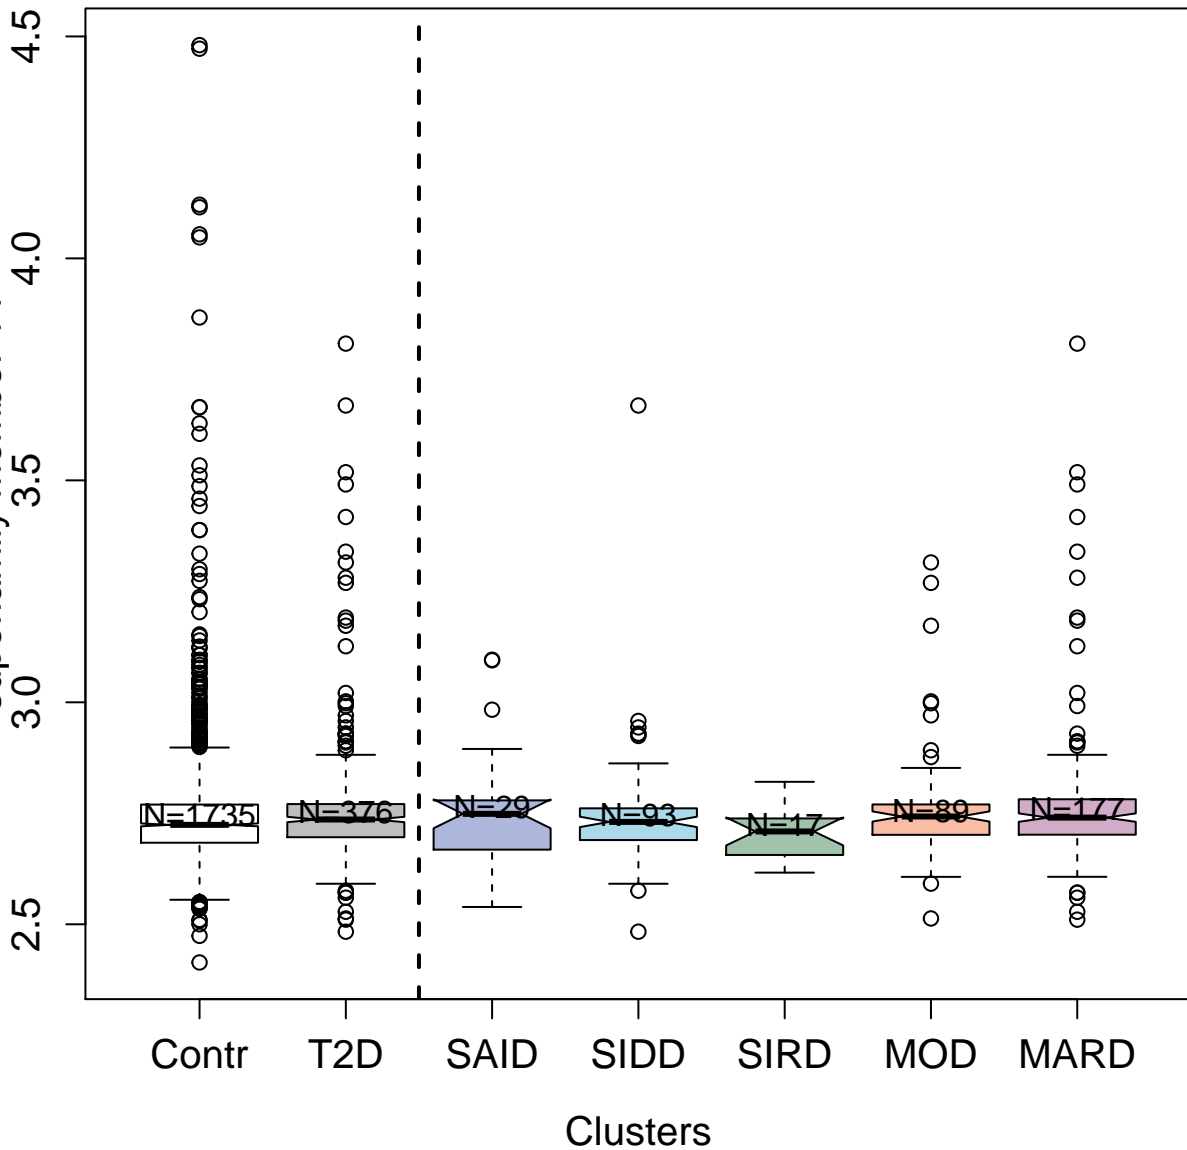



4301-58\_2 : Thymidine kinase; cytosolic

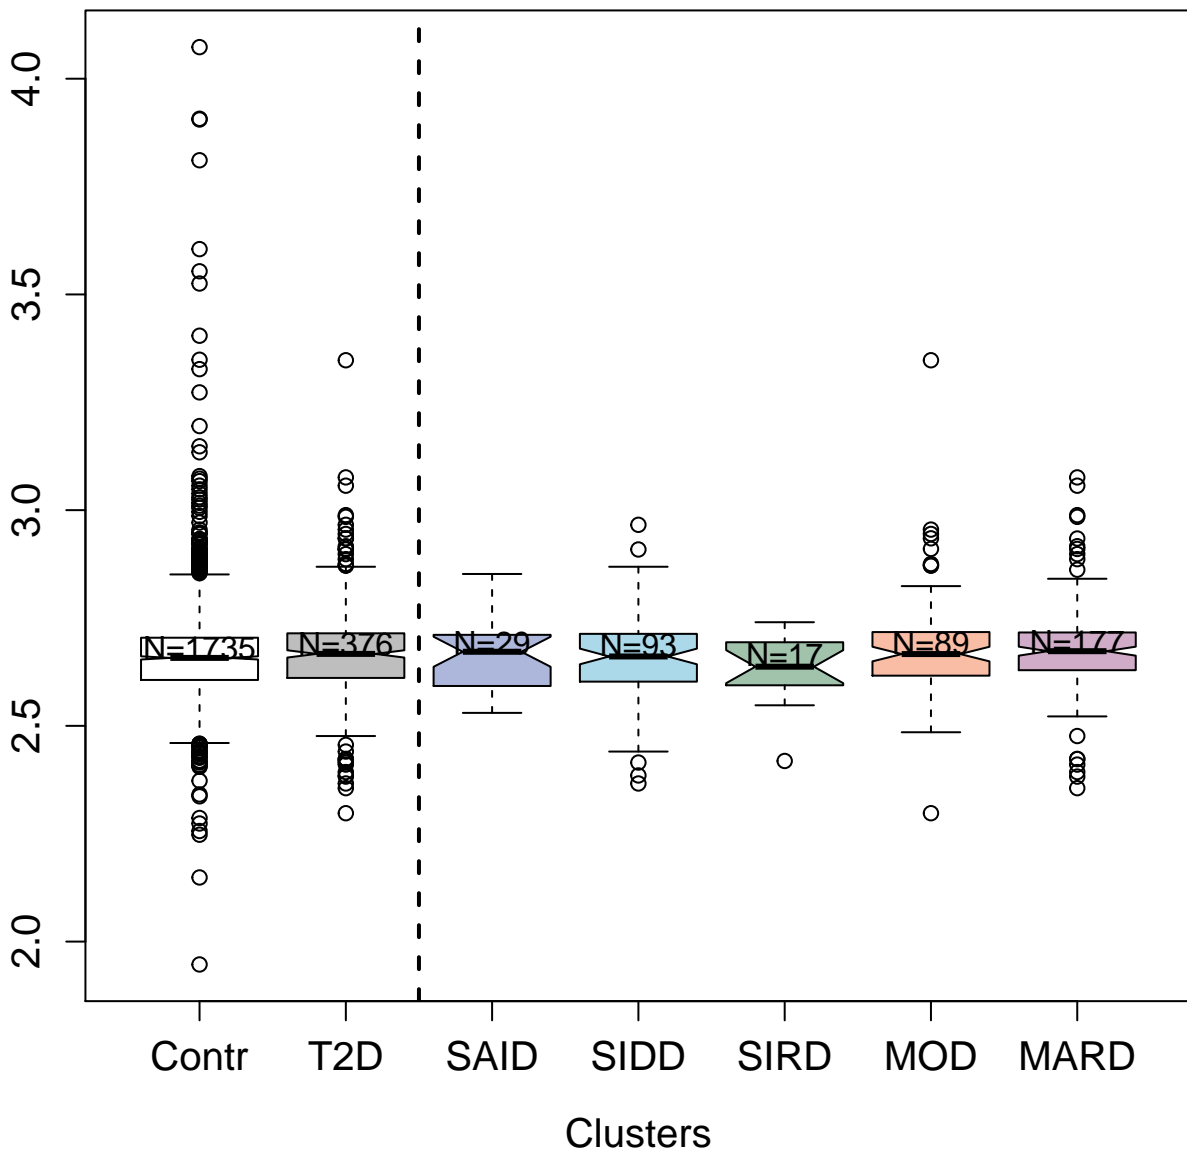

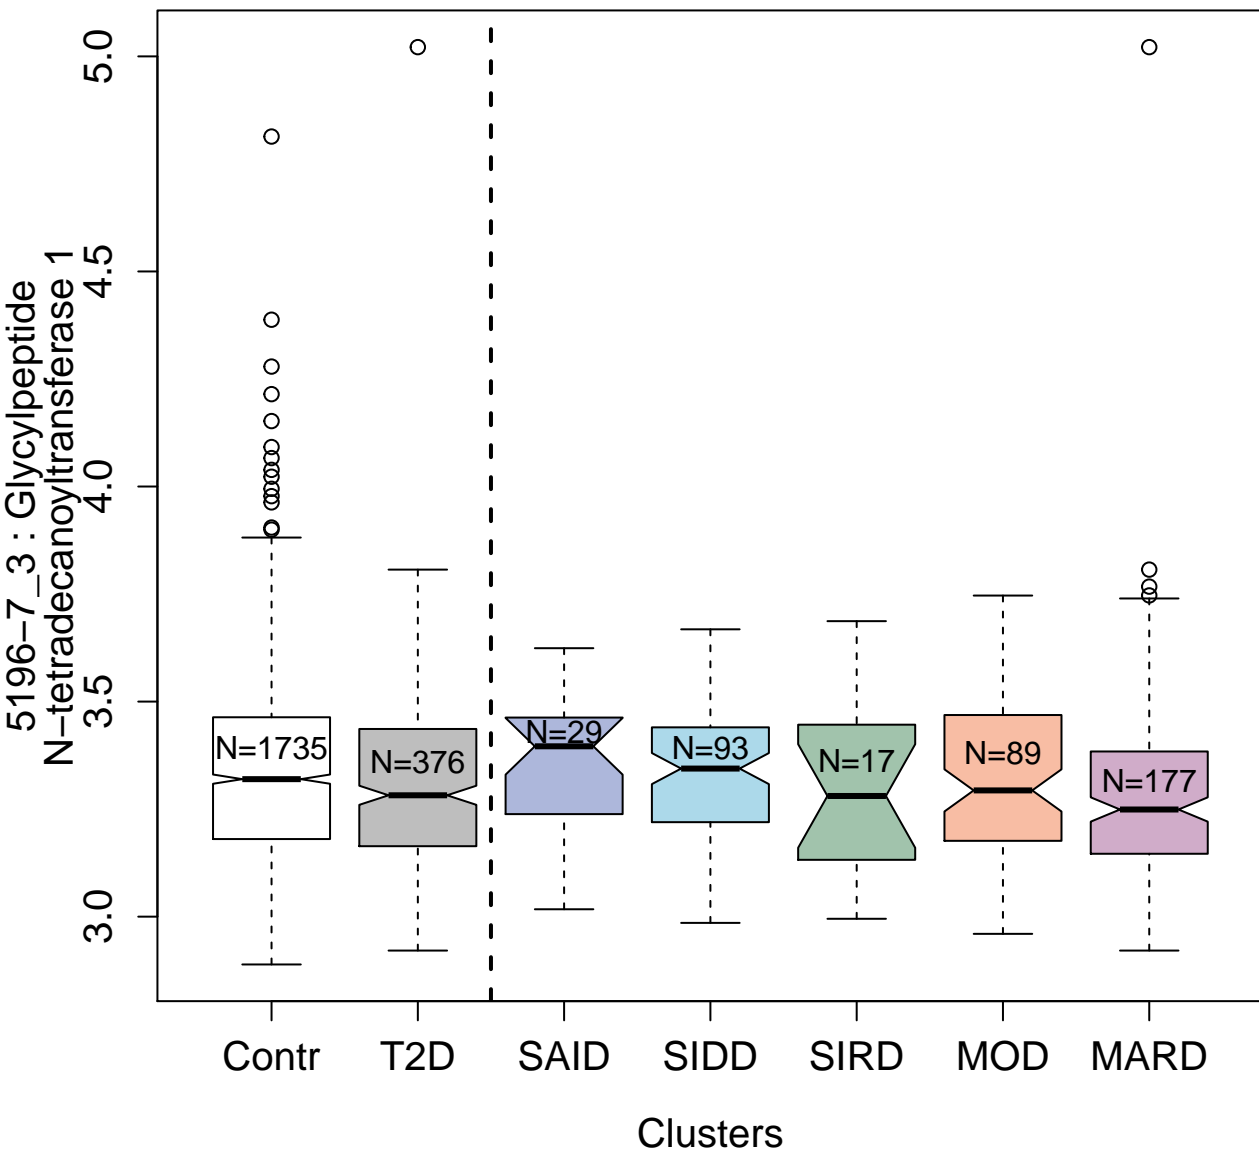

5070-76\_3 : Tumor necrosis factor receptor  
superfamily member 6B

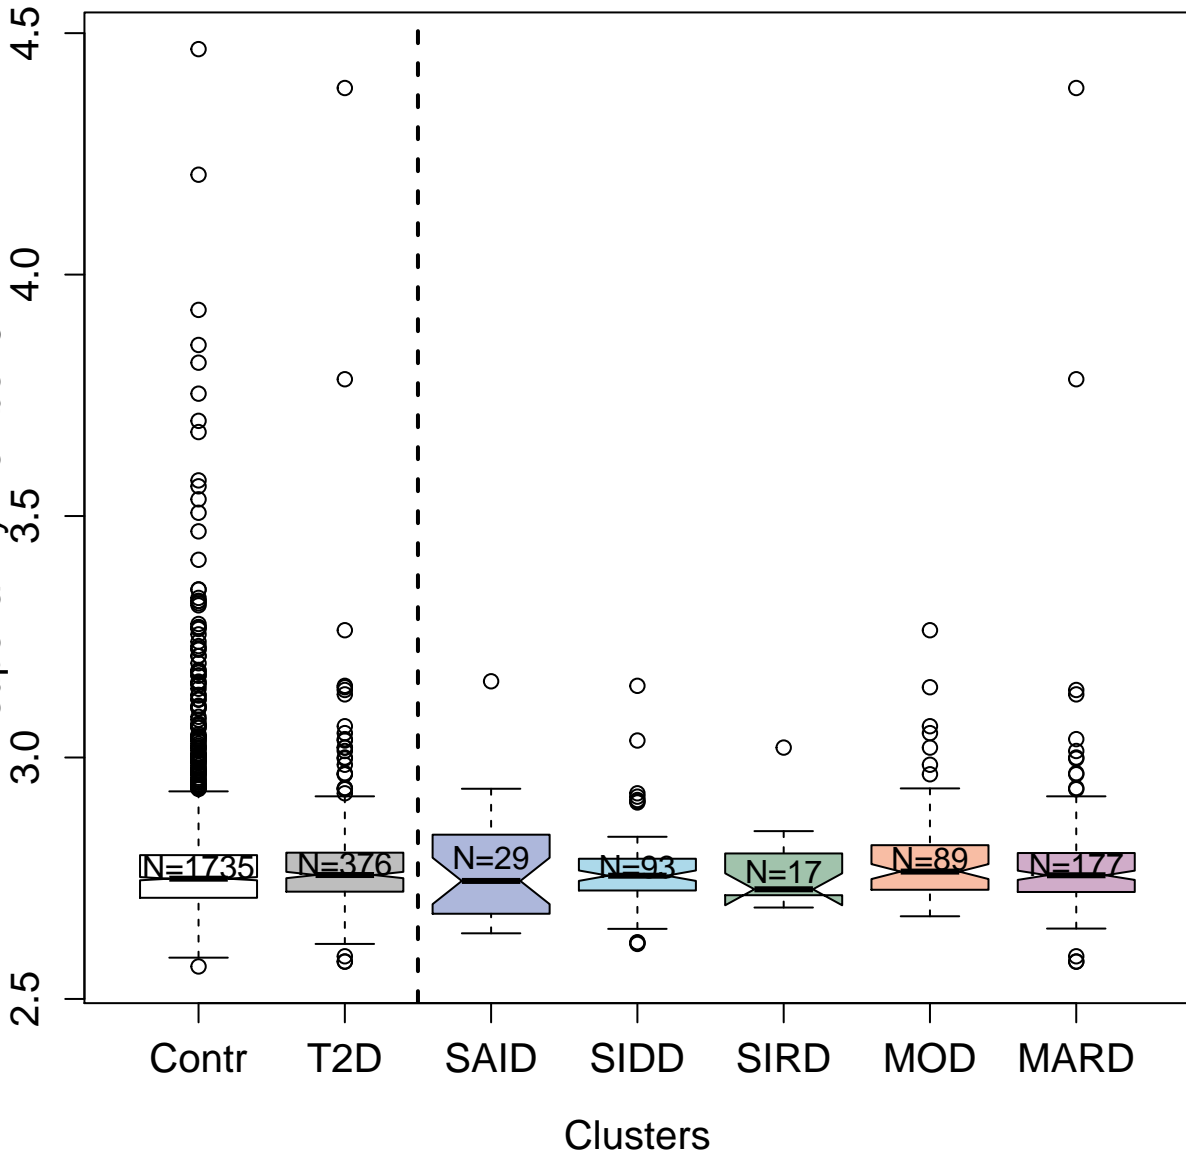

4876-32\_1 : Coagulation factor IX

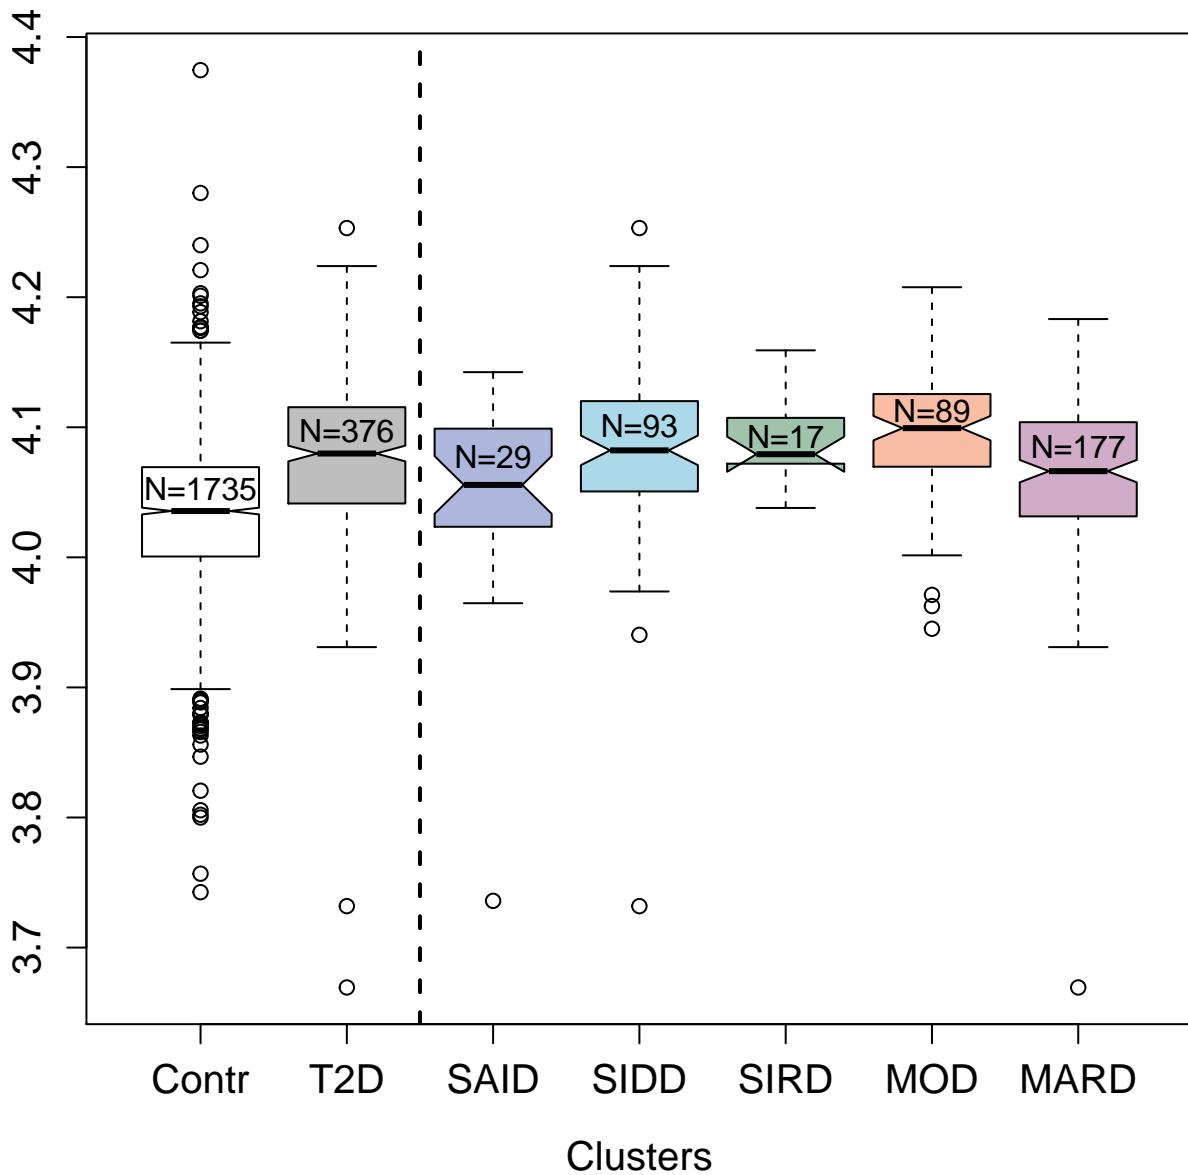

4559-64\_2 : Kynureninase

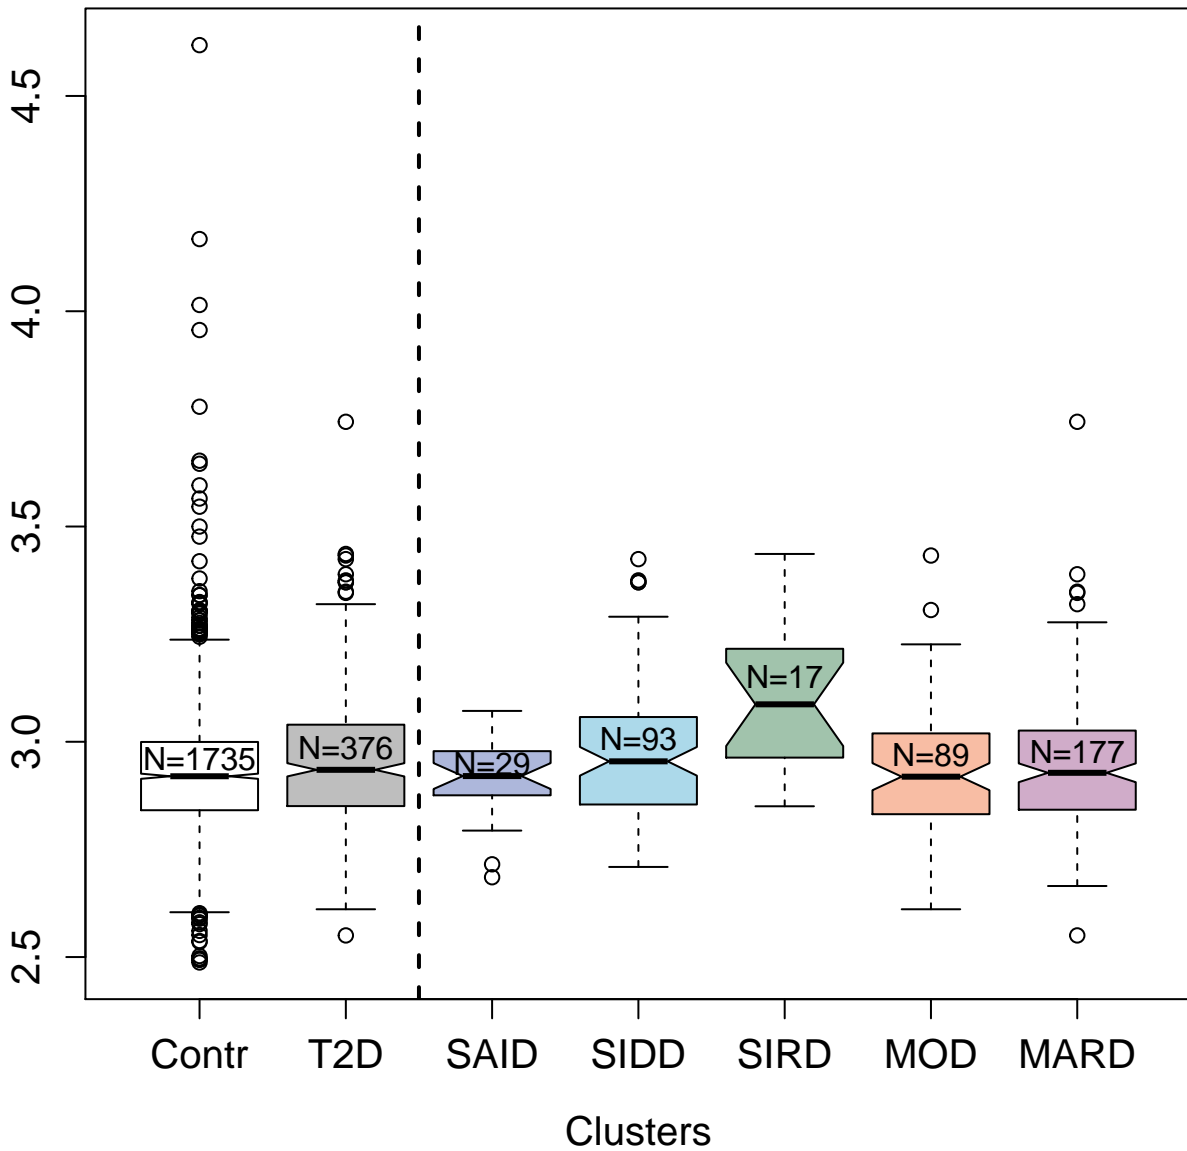

5063-12\_2 : Natural killer cell receptor 2B4

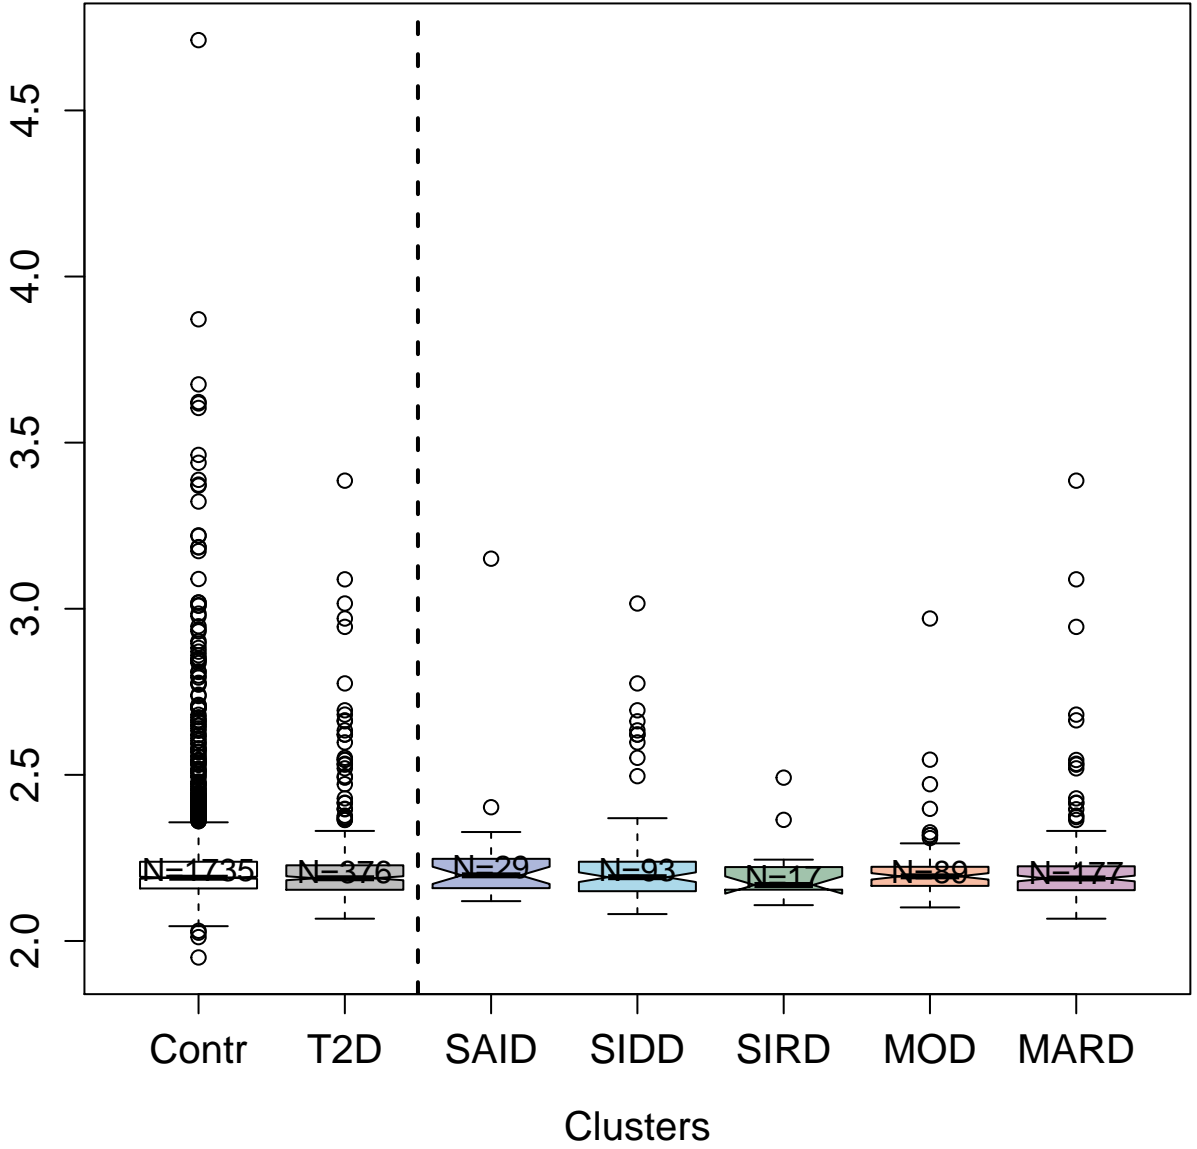

4922-13\_1 : C-C motif chemokine 19

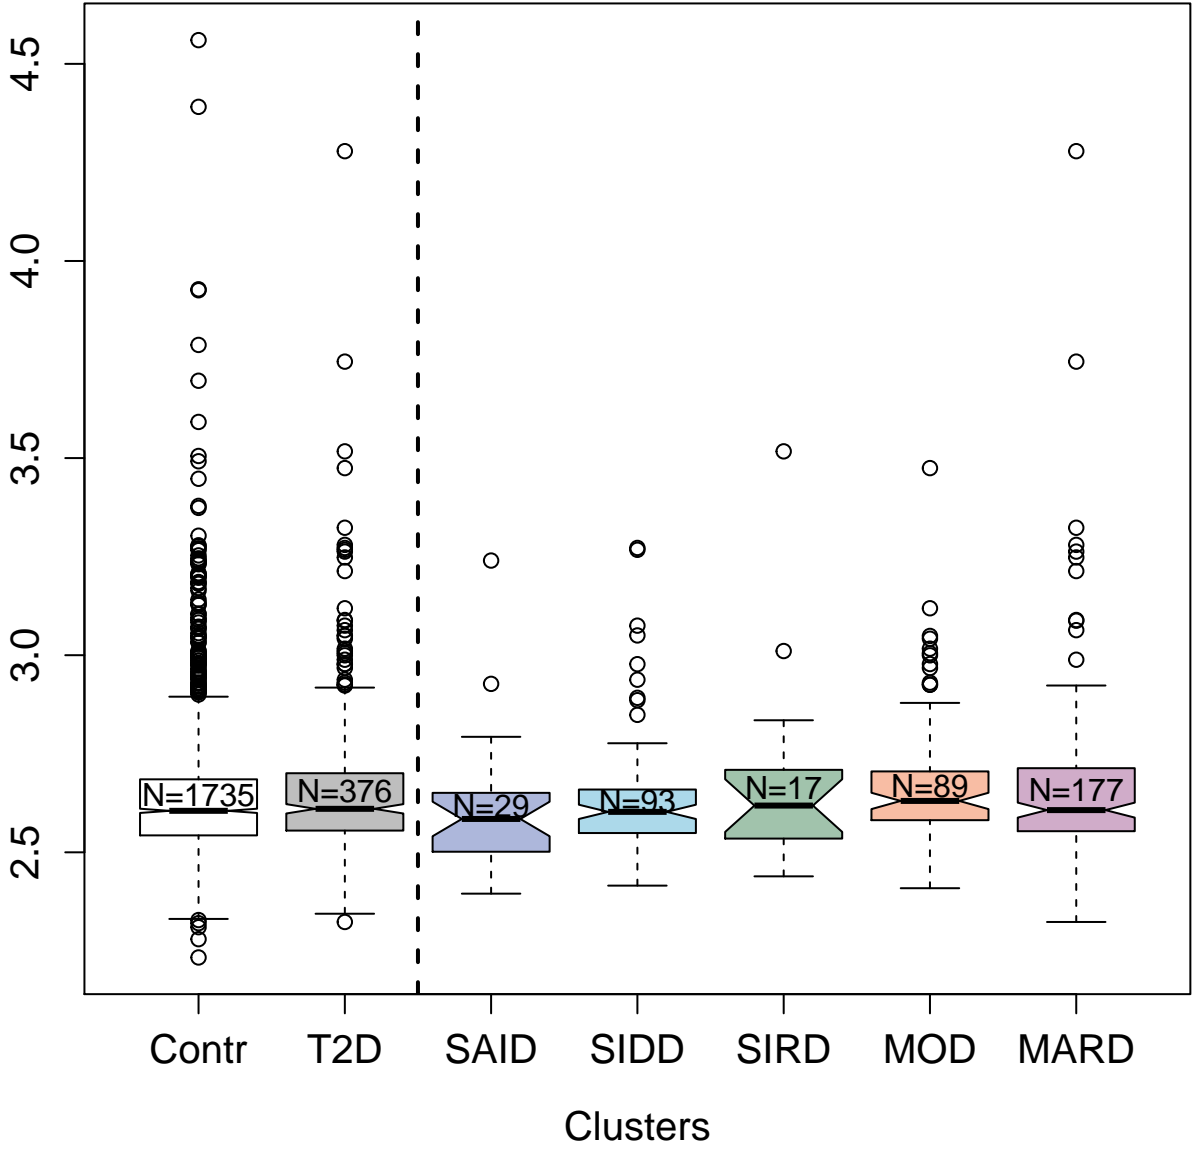

5108-72\_3 : Neurogenic locus notch homolog

protein 3

4.0  
3.5  
3.0  
2.5

Contr

T2D

SAID

SIDD

SIRD

MOD

MARD

Clusters

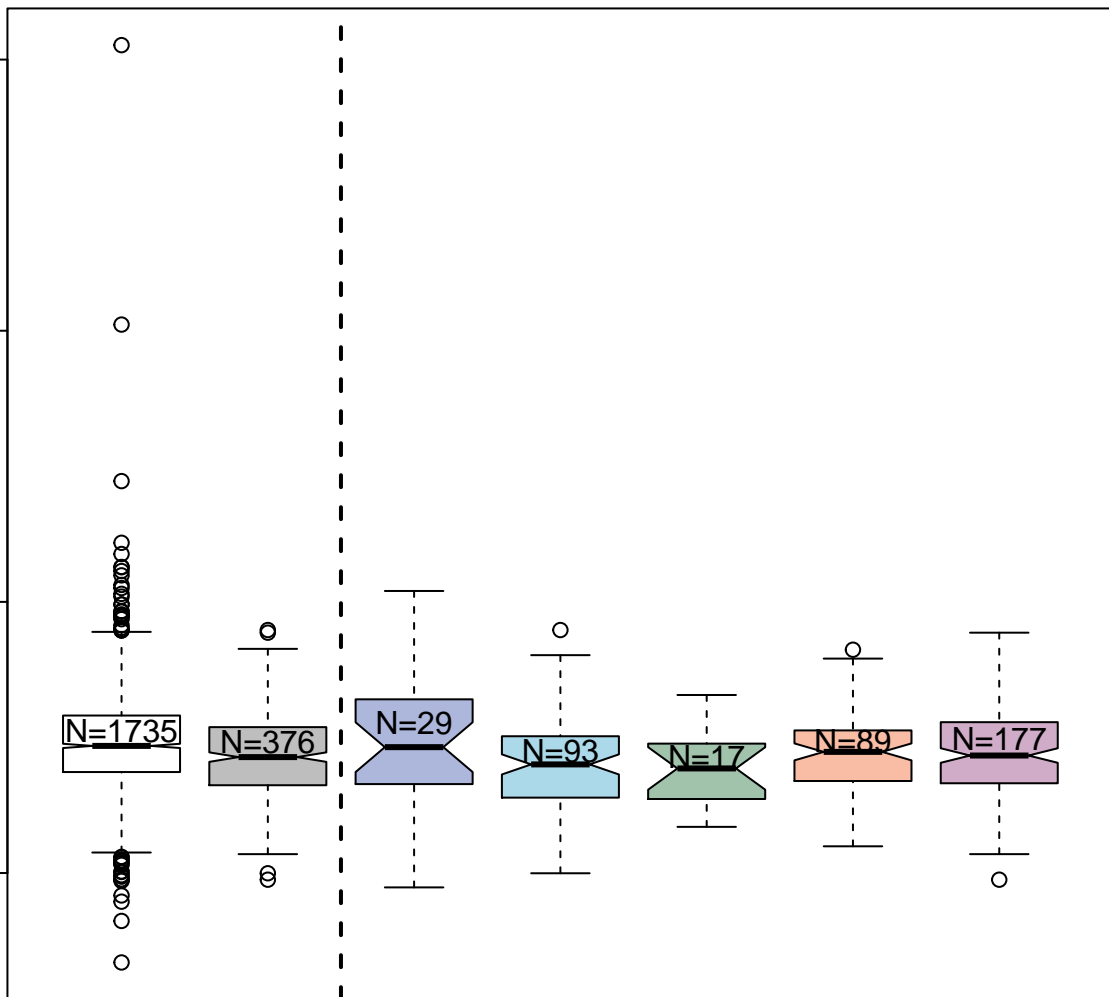



3796-79\_2 : Angiopoietin-related protein 4

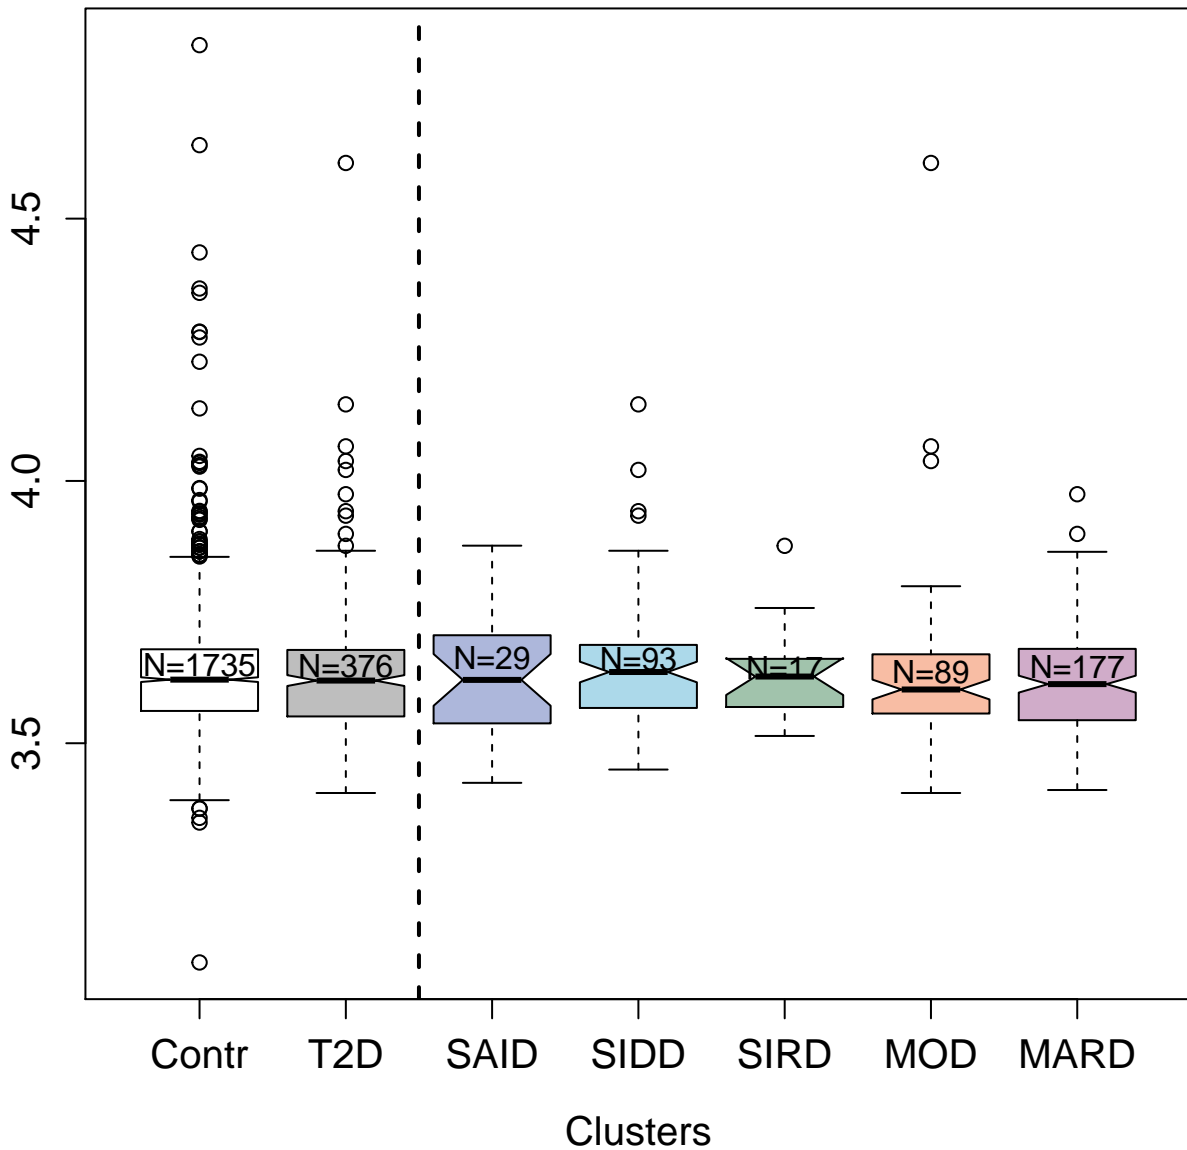

13088-397\_3 : Betacellulin

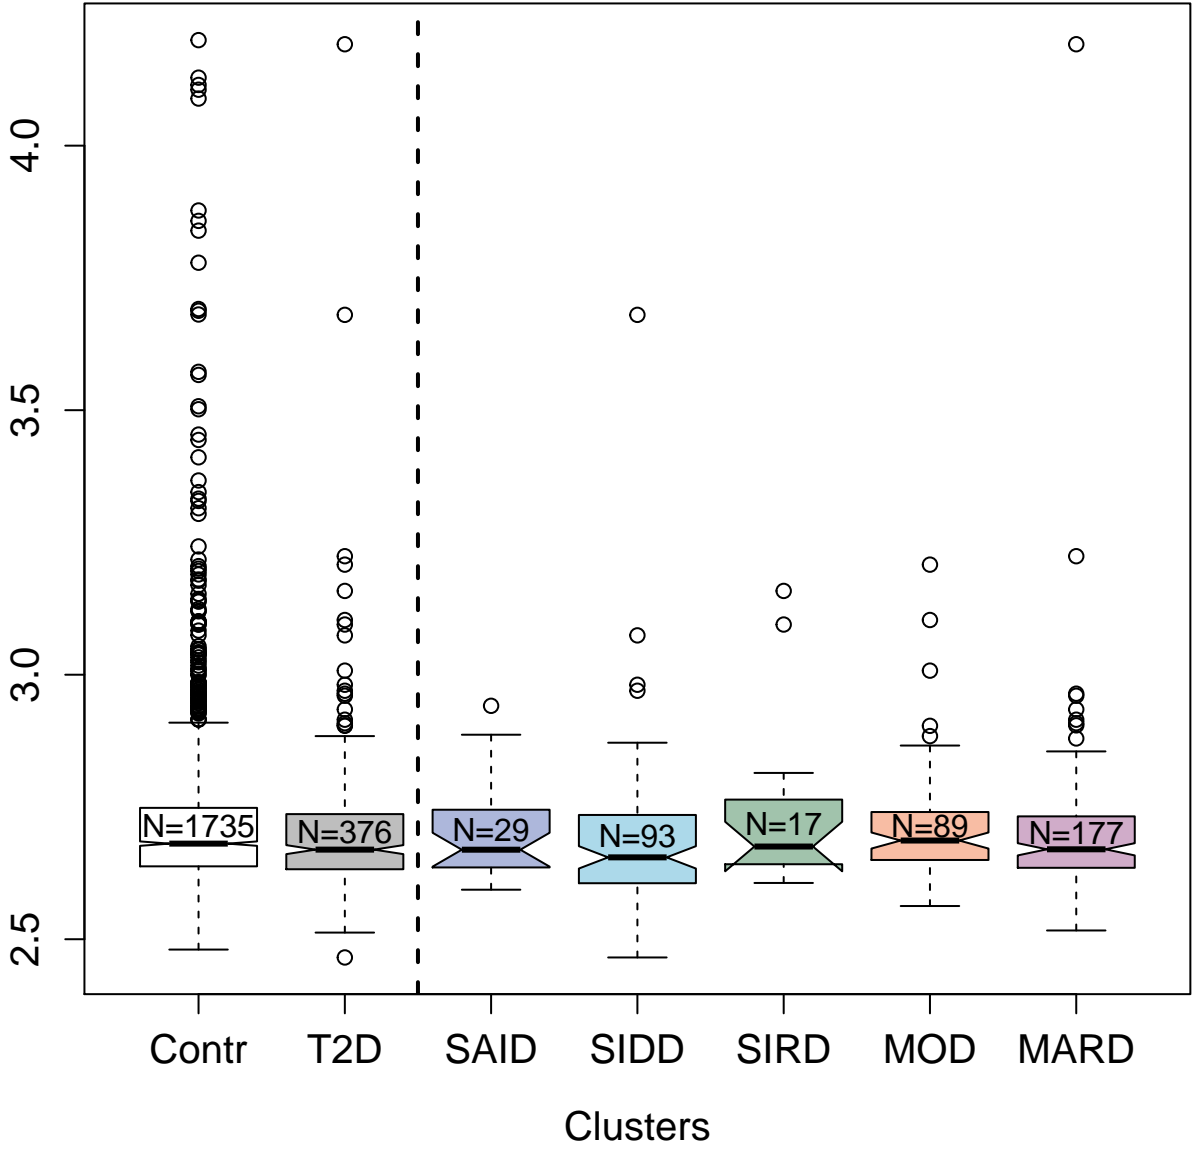

2431-17\_3 : Cathepsin G

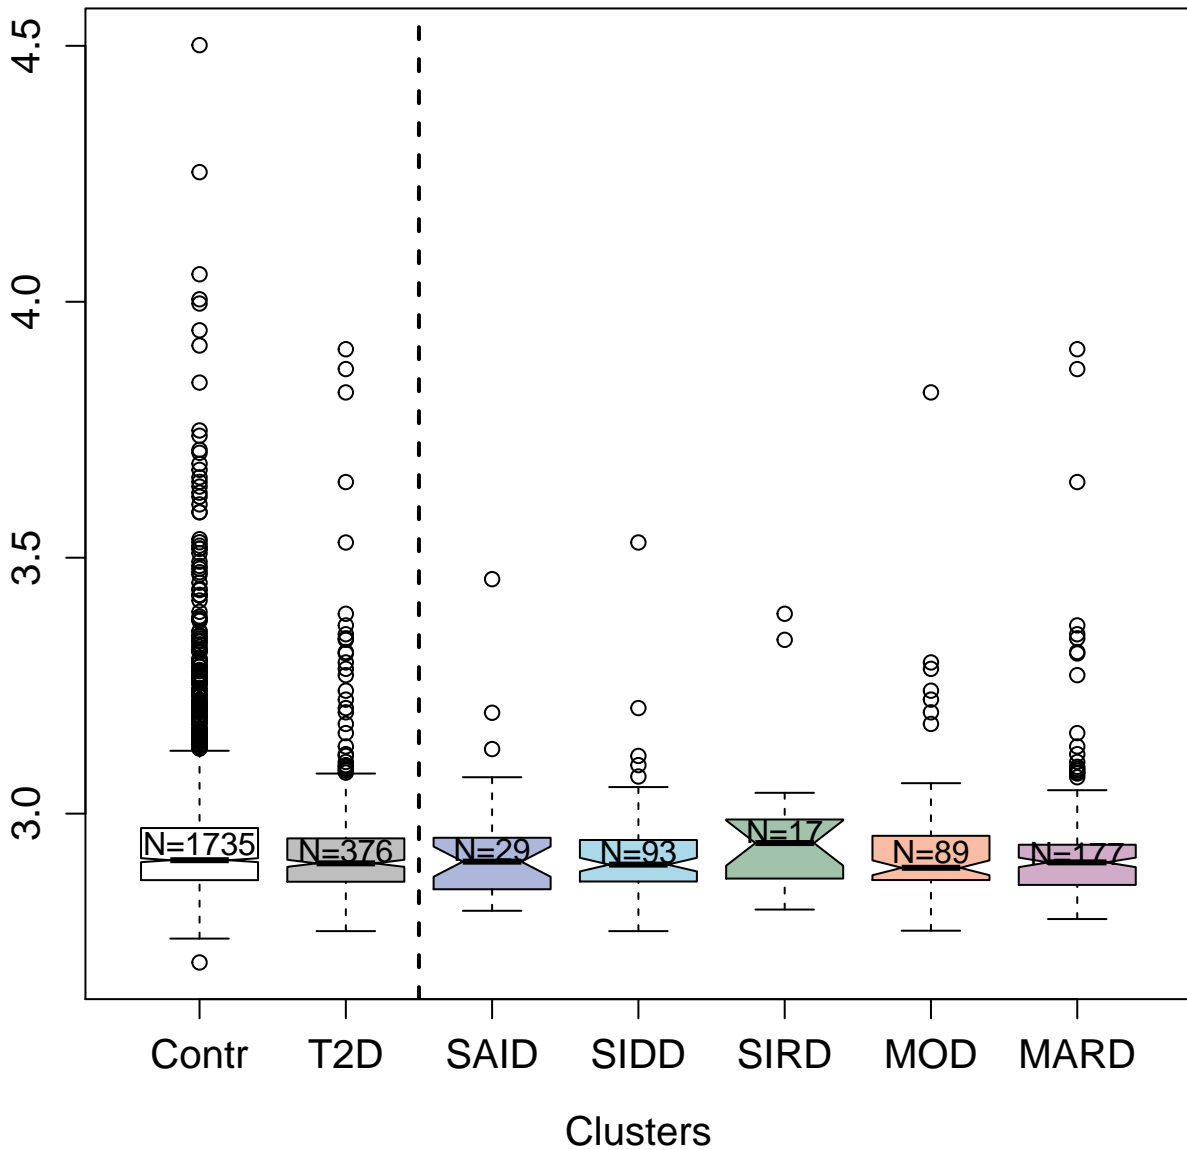

2636-10\_2 : Tumor necrosis factor receptor  
superfamily member 3

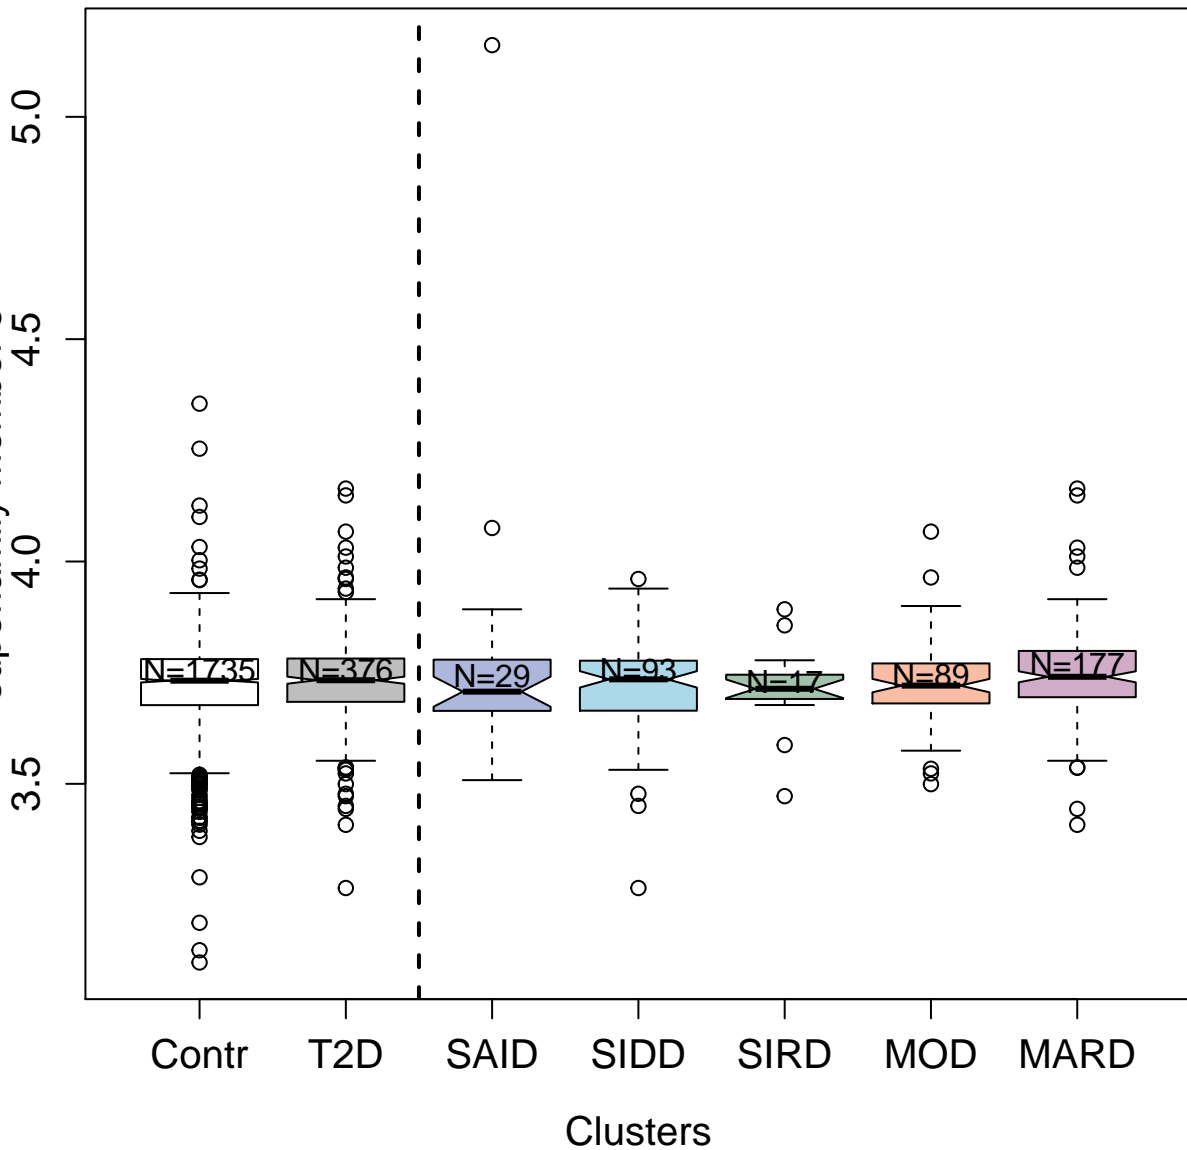

5231-79\_3 : Proprotein convertase  
subtilisin/kexin type 9

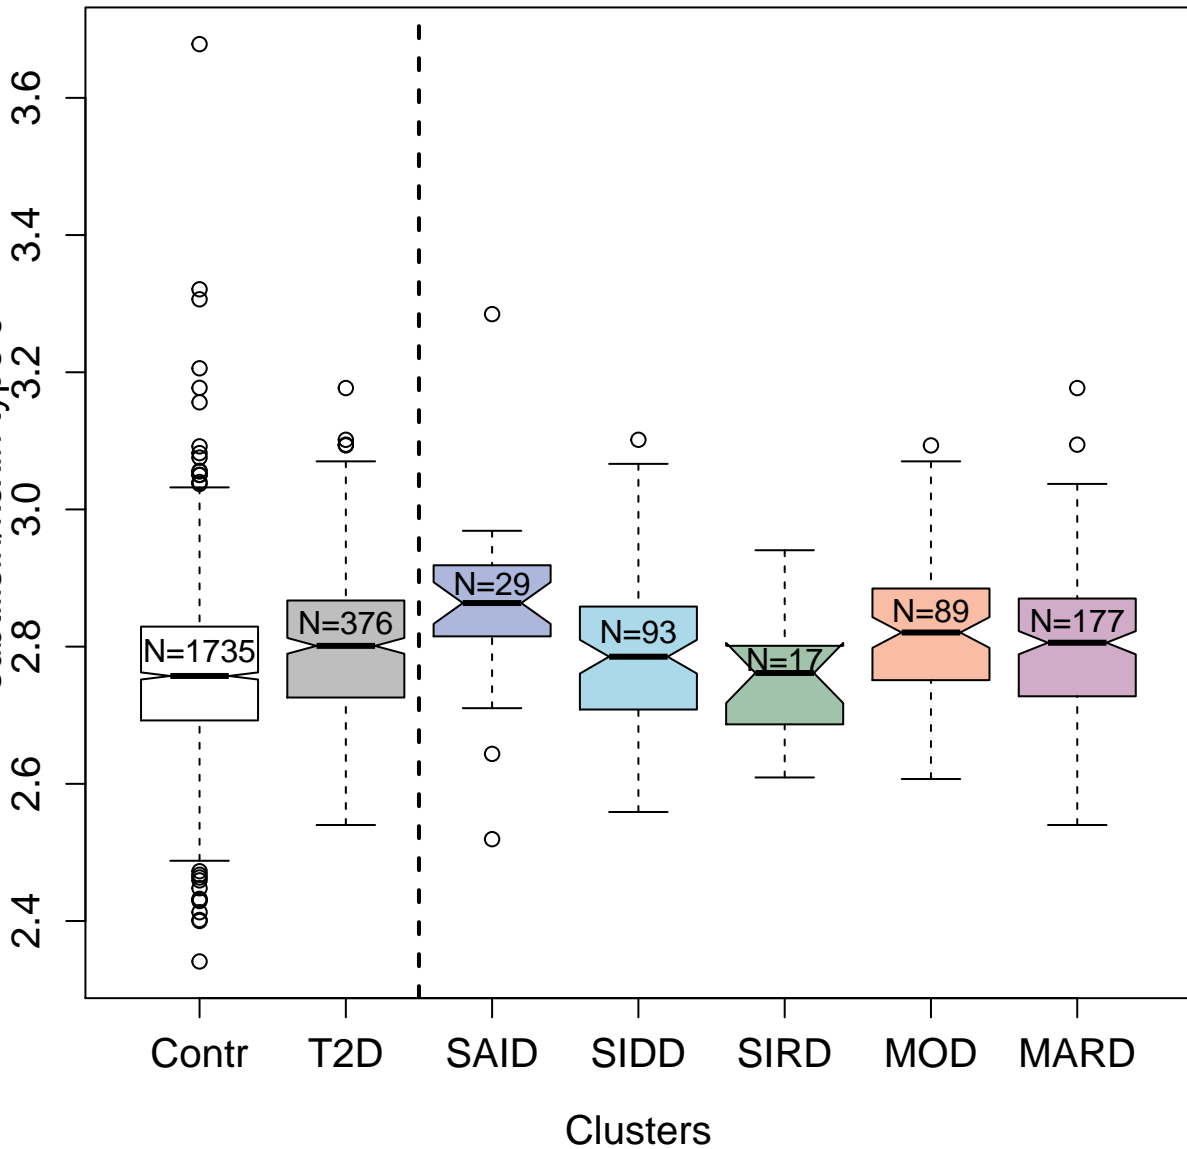

4150-75\_2 : Plasmin

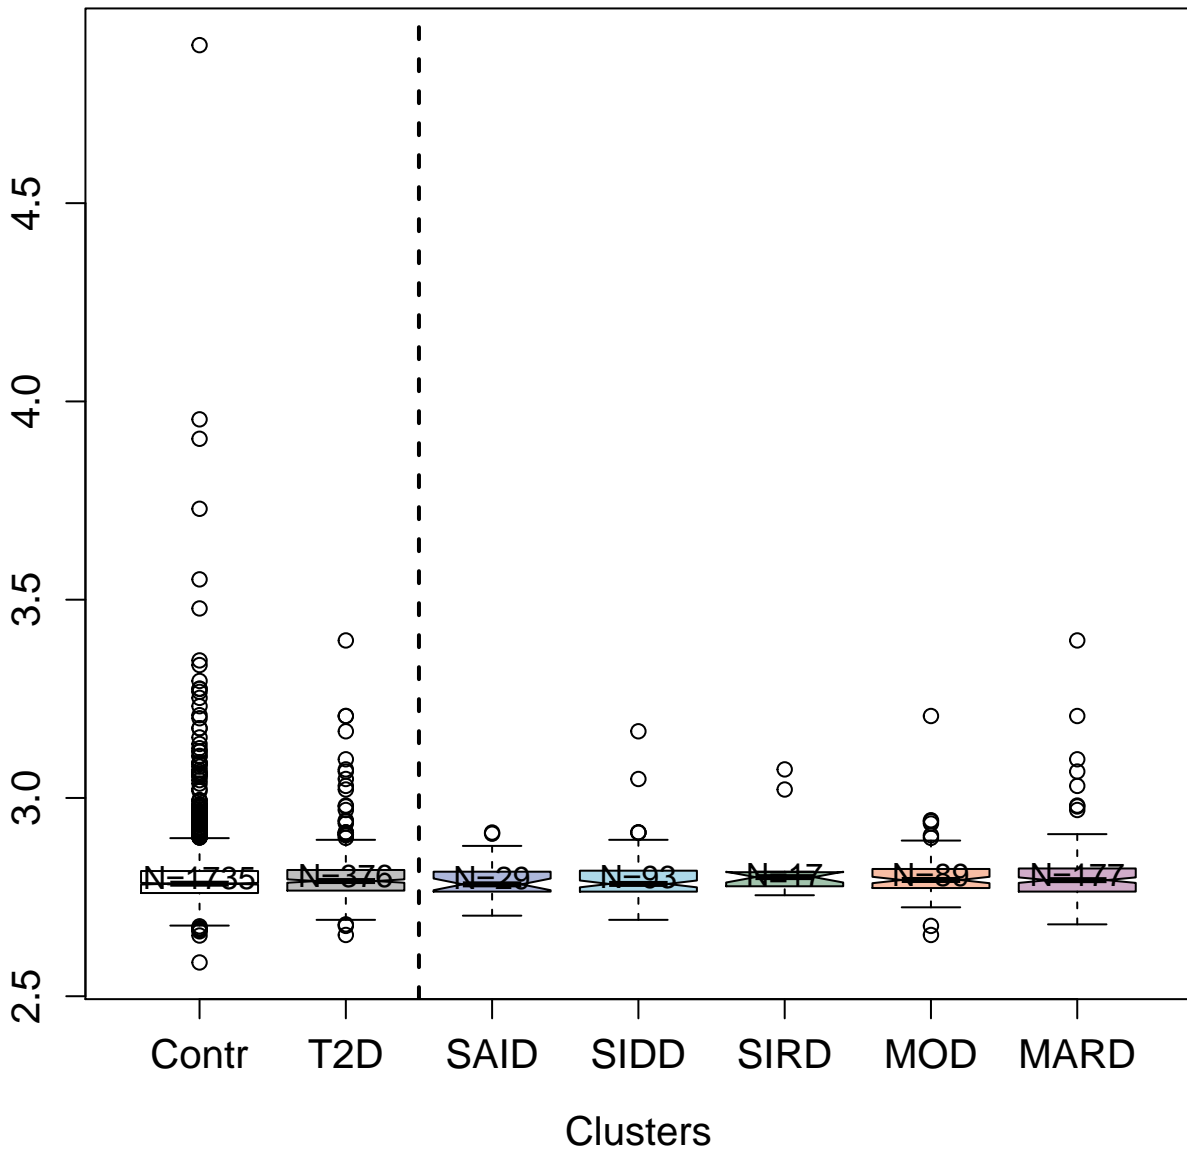

5867-60\_3 : Arginase-1

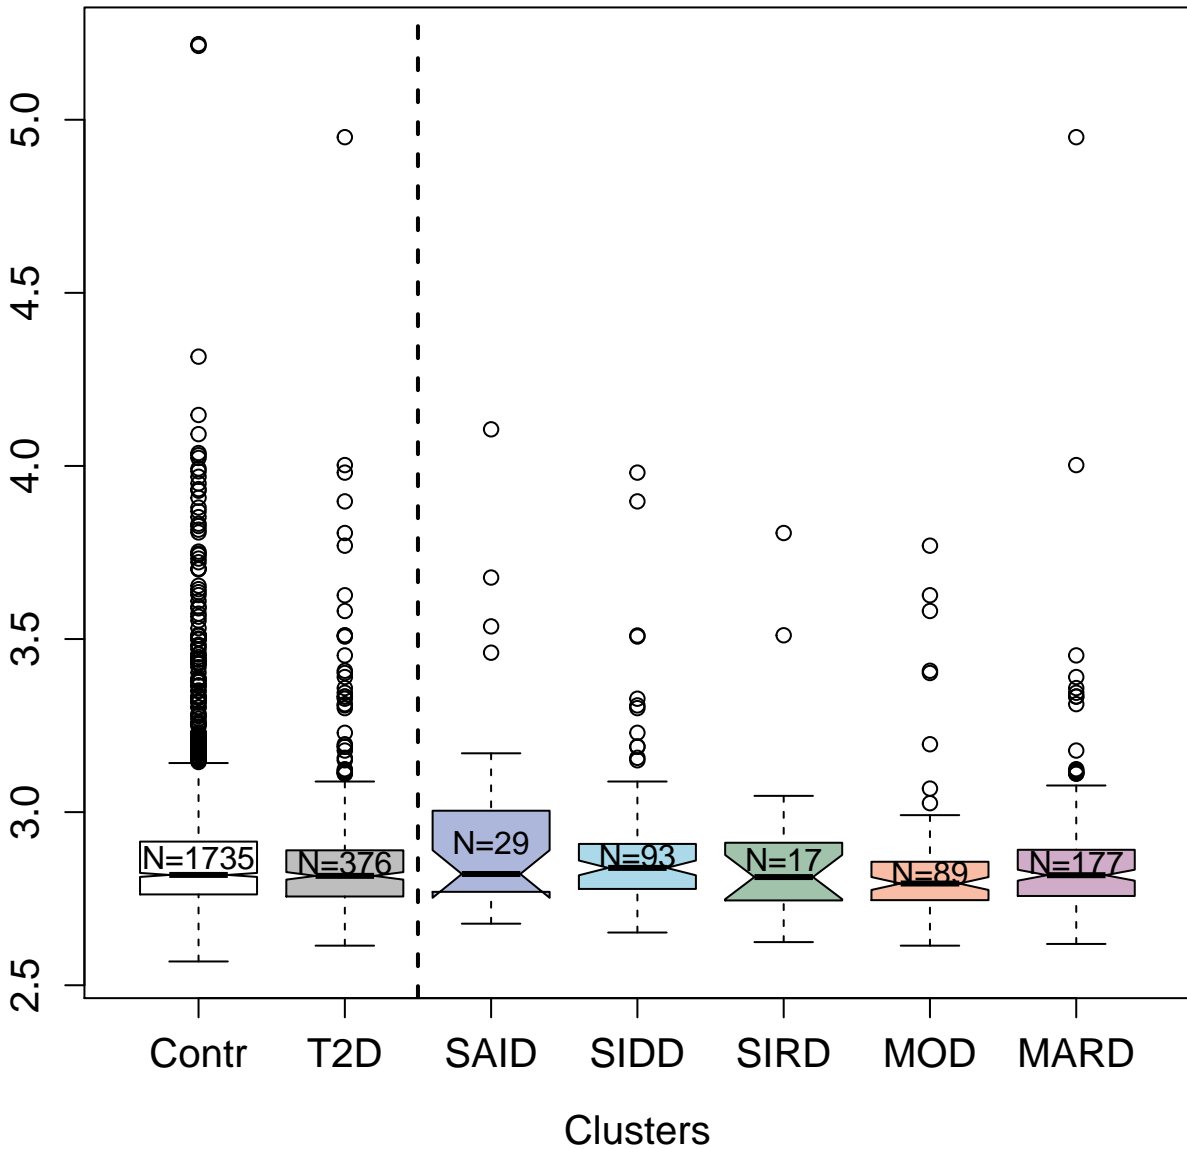

2849-49\_1 : Allograft inflammatory factor 1

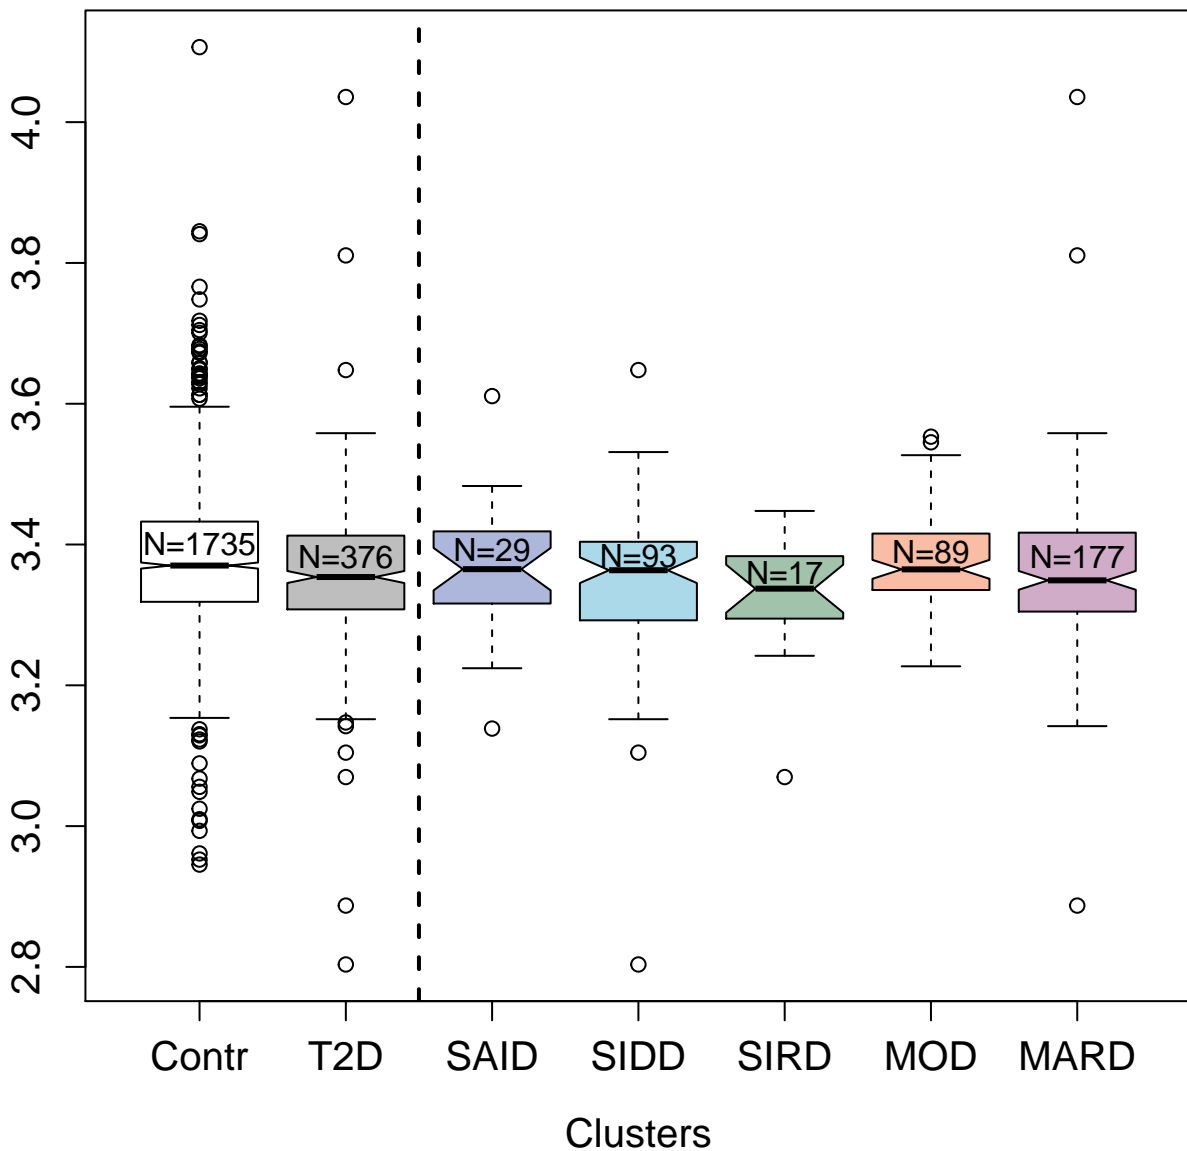



2865-77\_2 : Histone acetyltransferase KAT6A

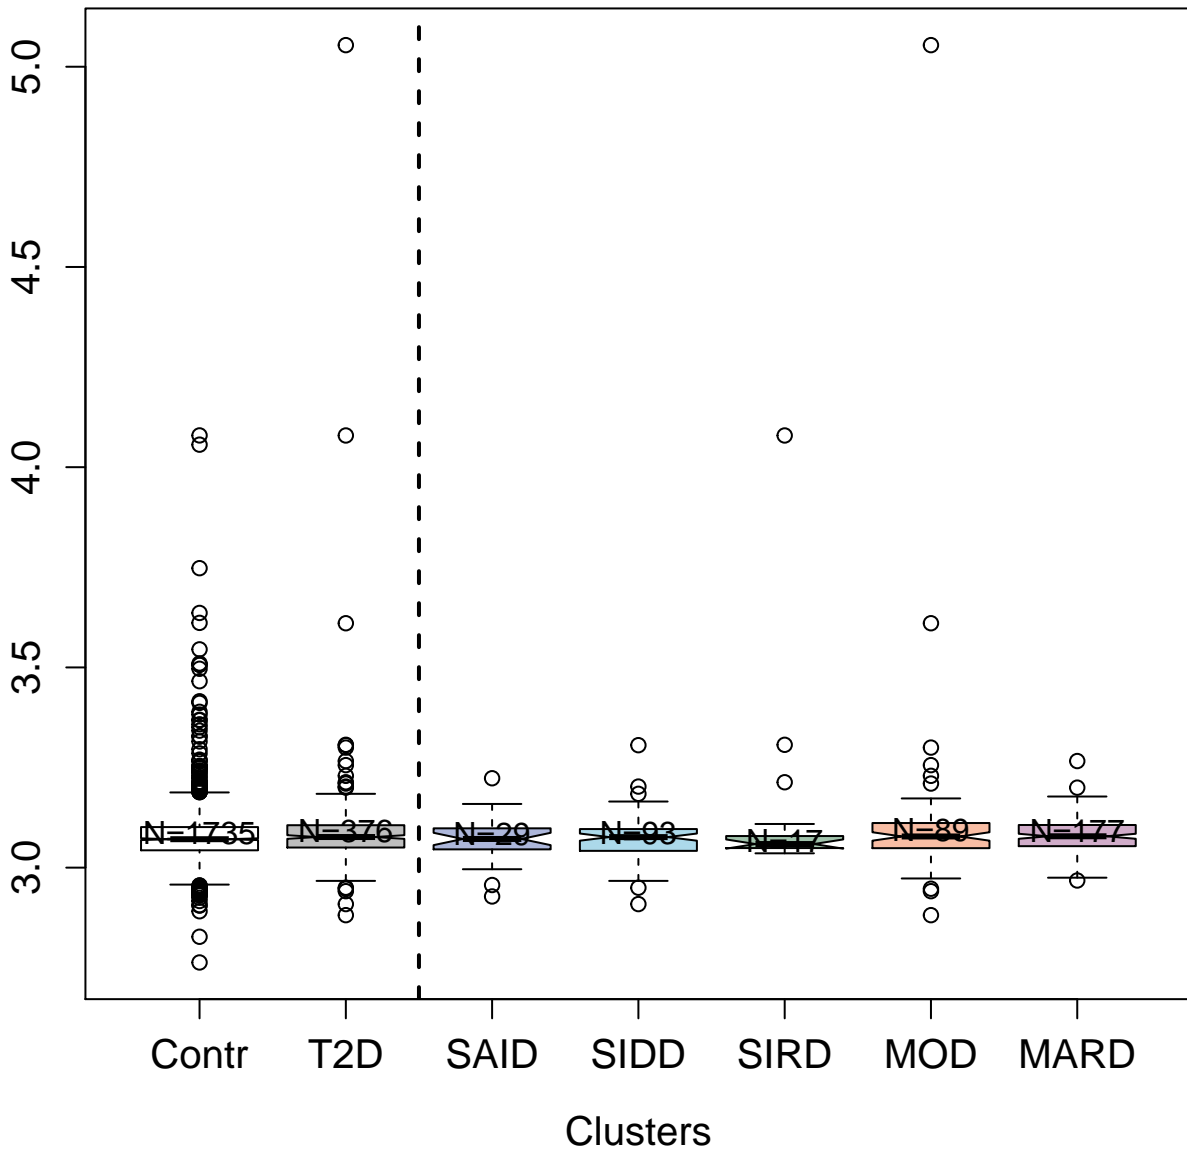

4337-49\_2 : C-reactive protein

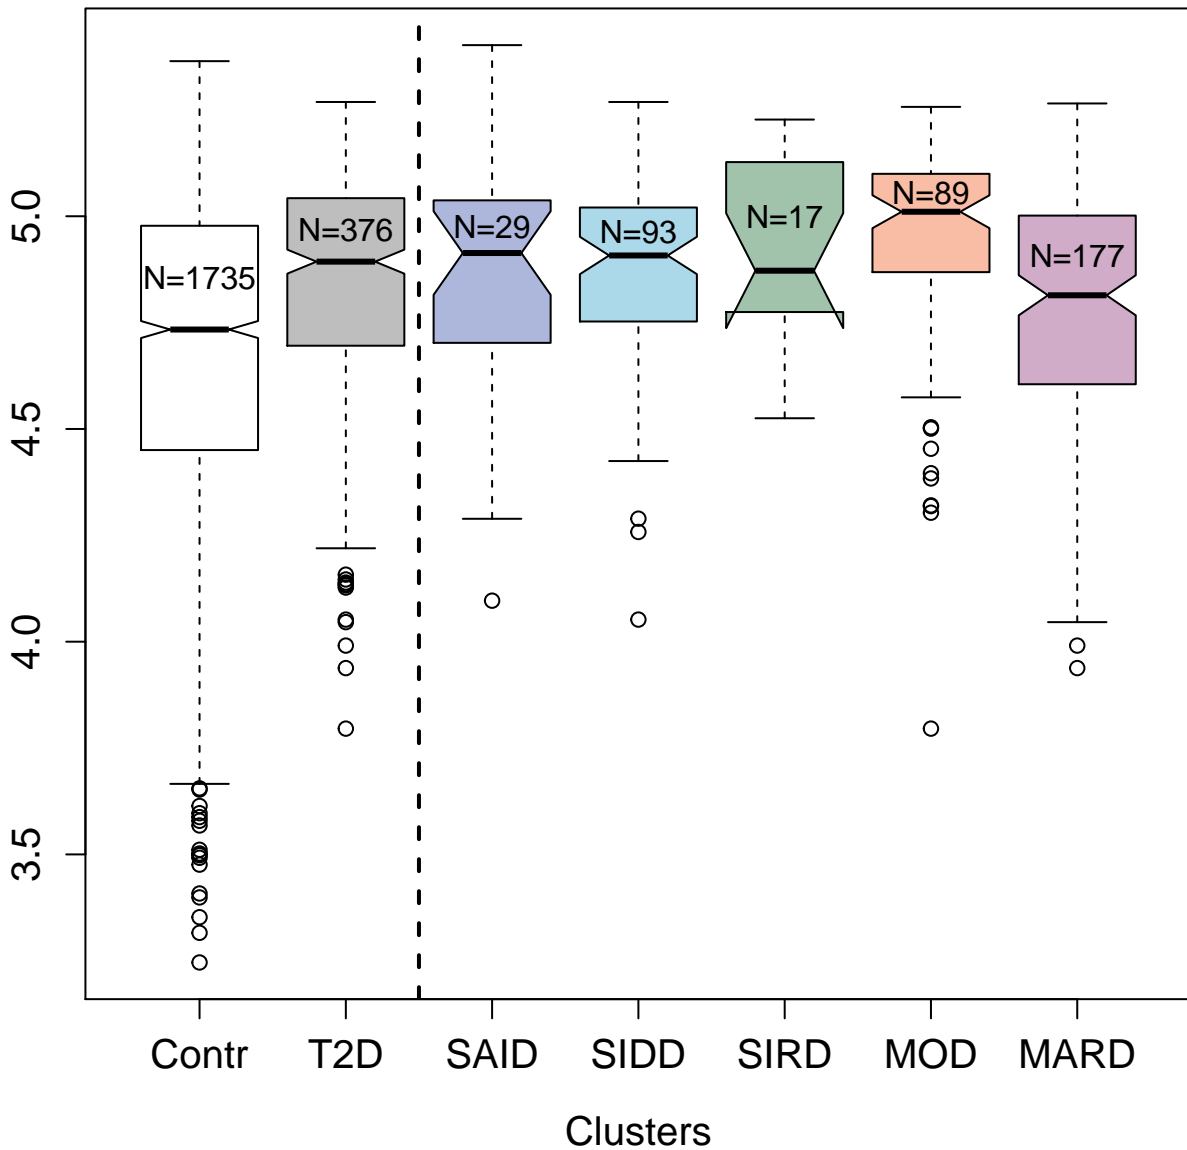

3832-51\_1 : Protein-tyrosine kinase 6

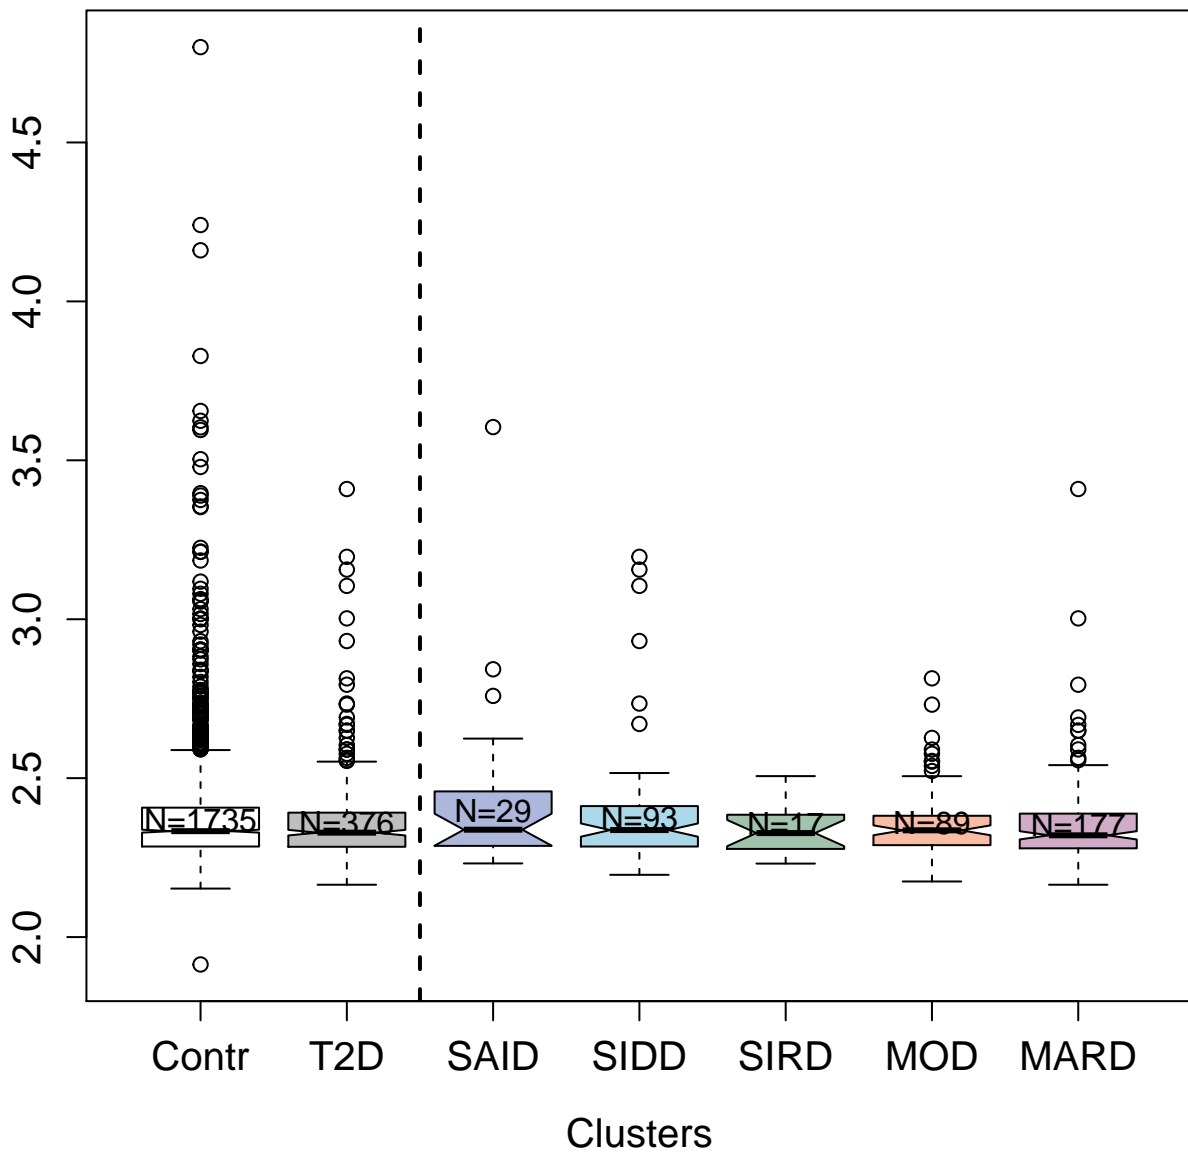

14133-93\_3 : Interleukin-1 receptor type 2

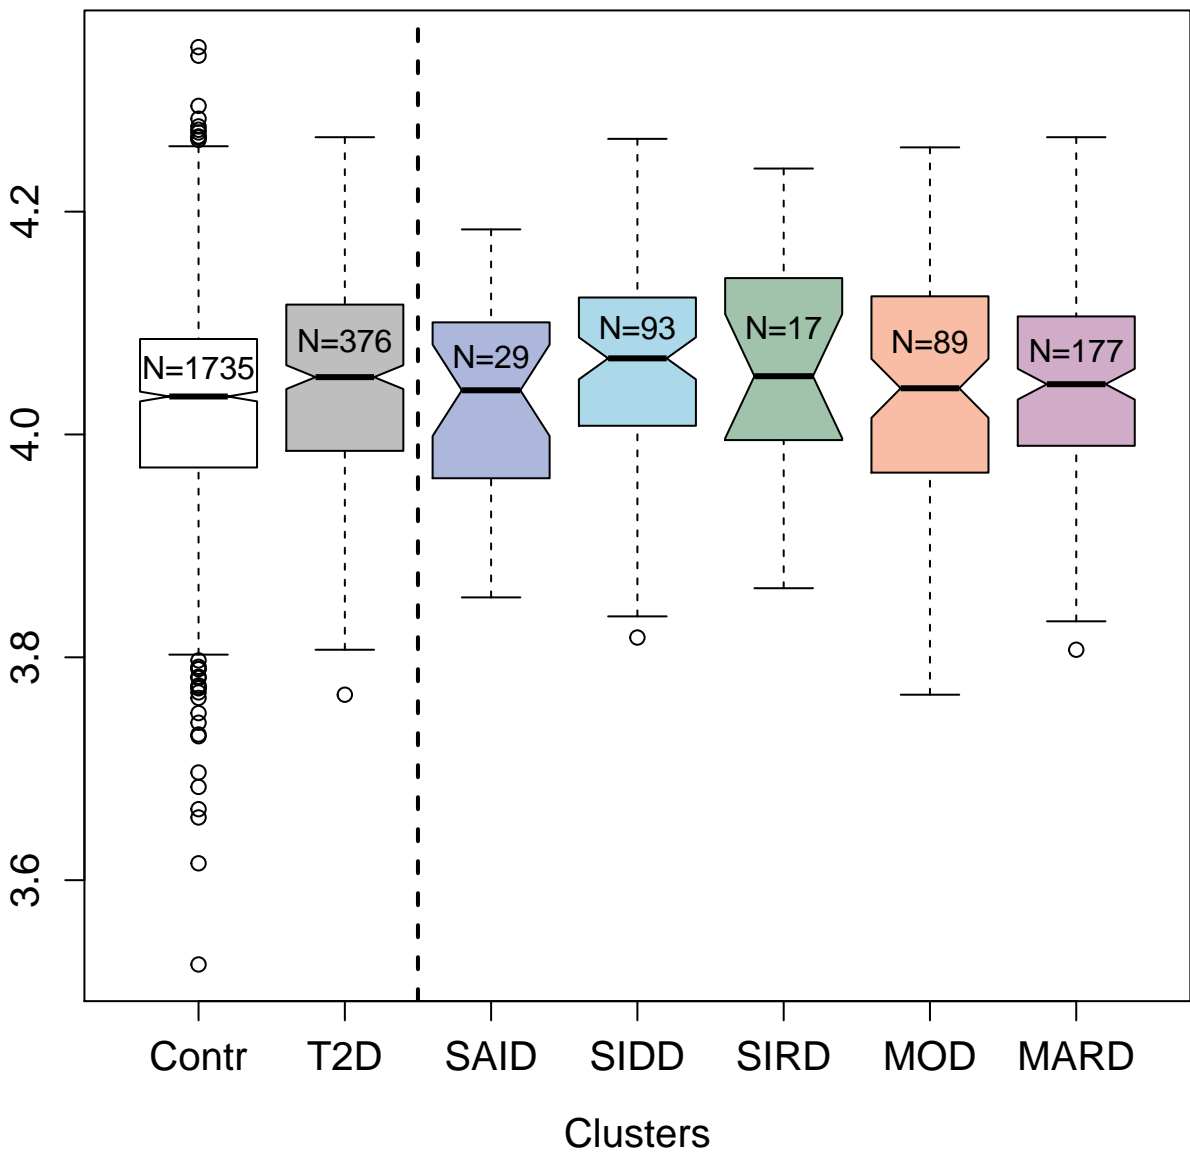

2853-68\_2 : Serine/threonine-protein kinase Chk1

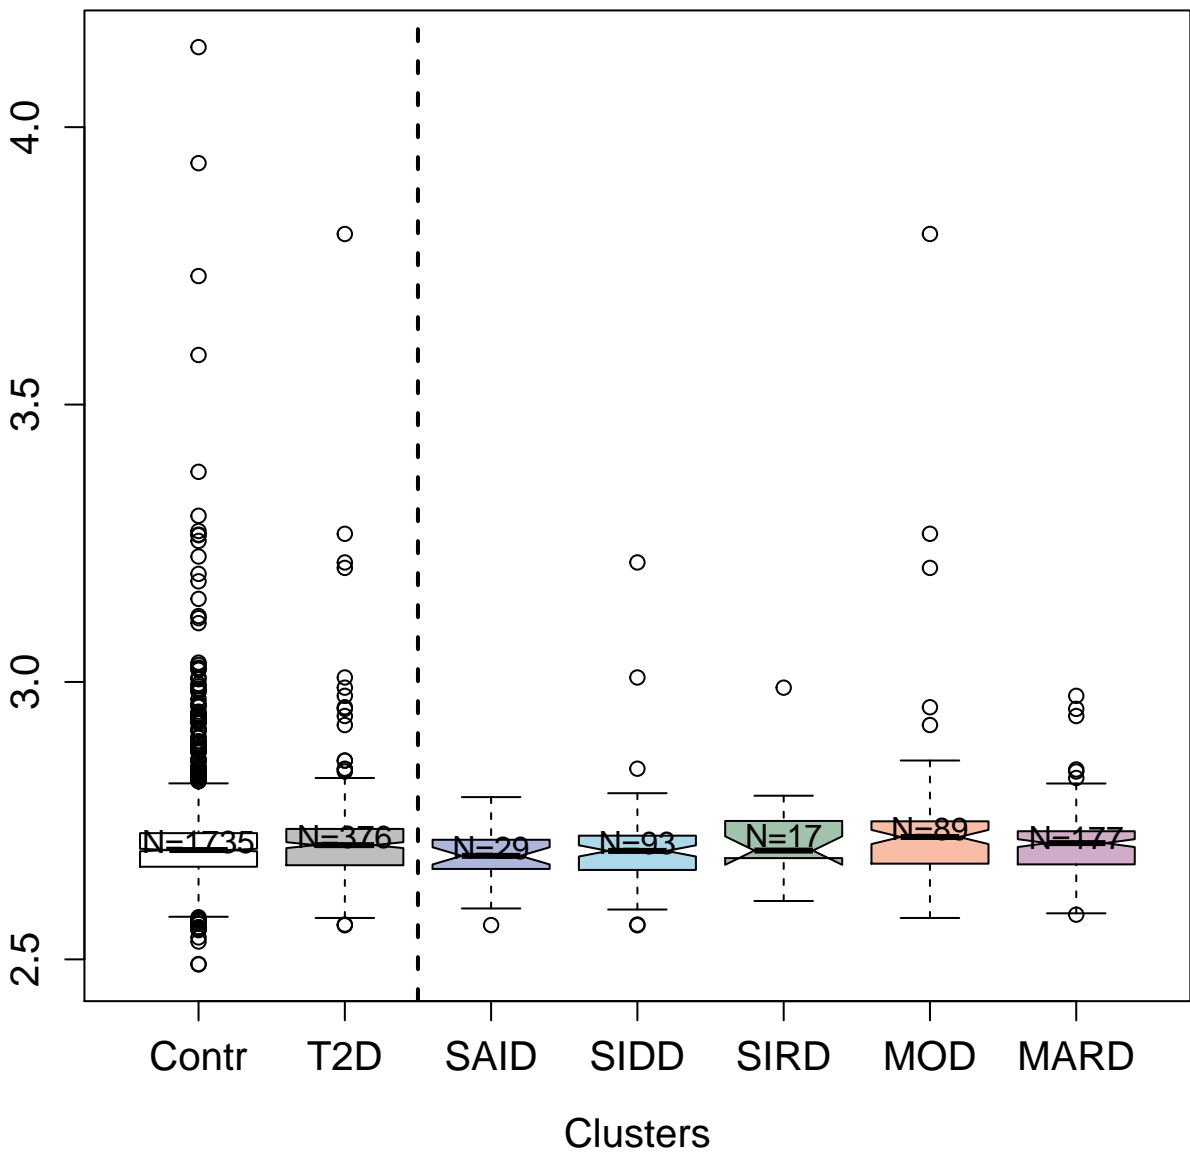

3627-71\_4 : Membrane metallo-endopeptidase-like 1

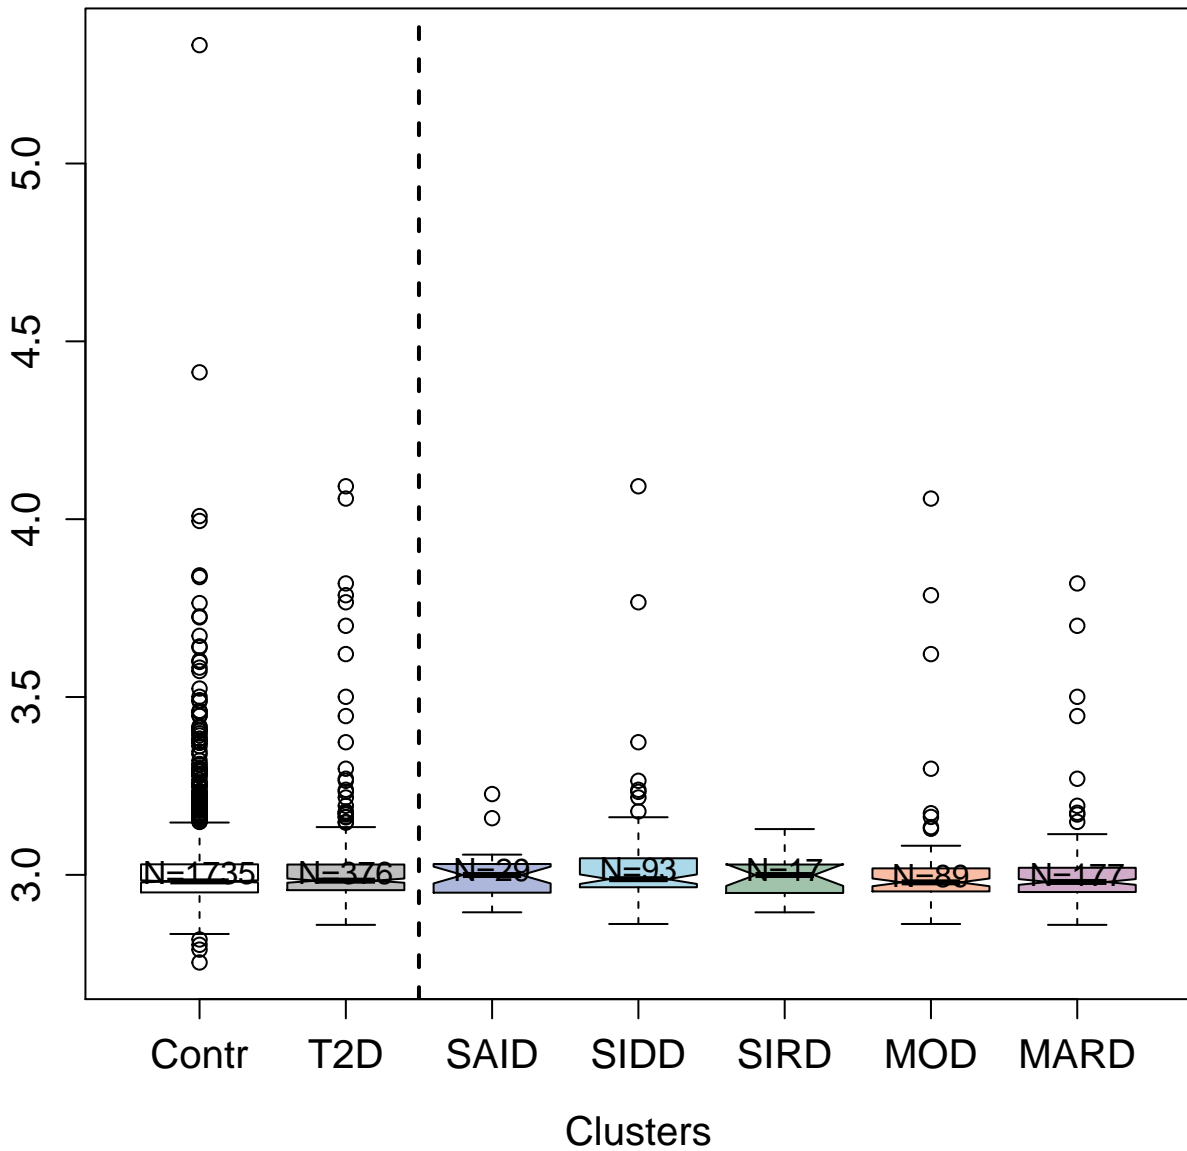

3367-8\_3 : Fetuin-B

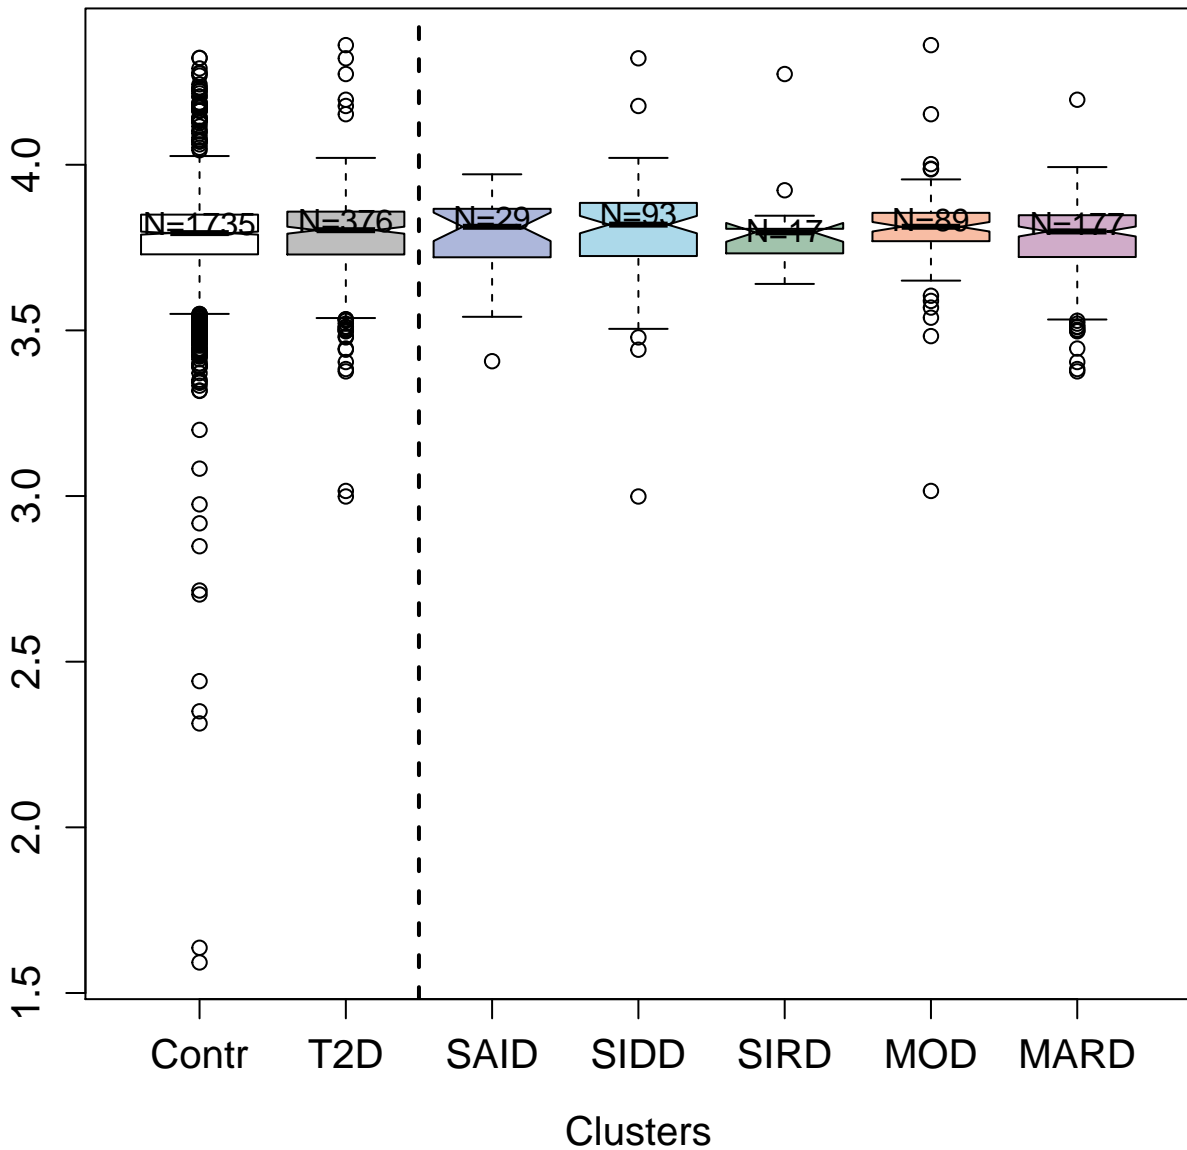

5114-65\_3 : Prolactin receptor

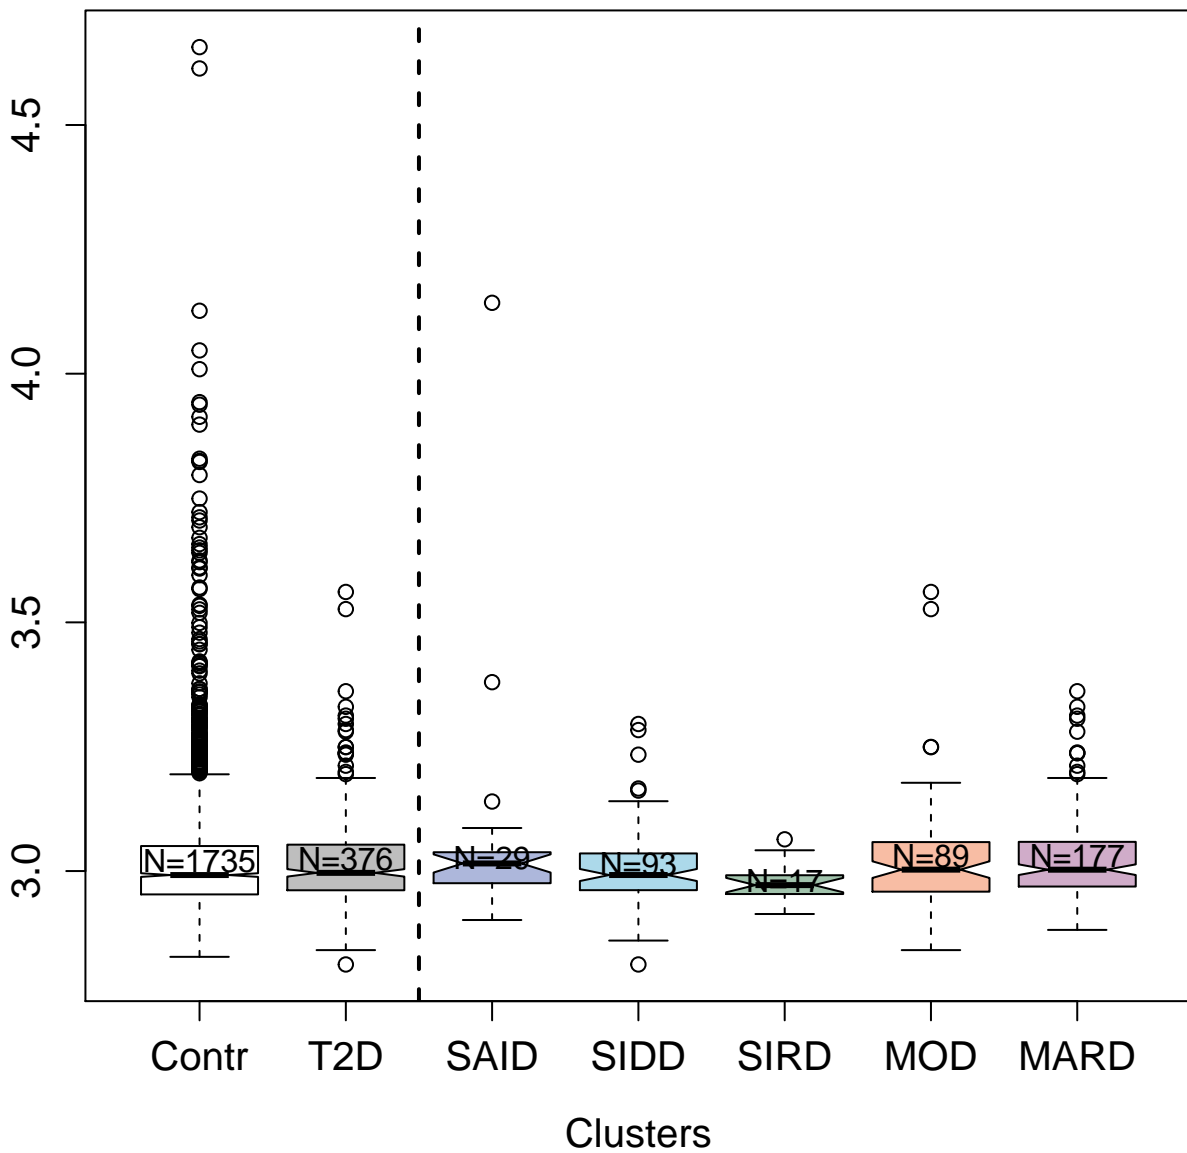



3714-49\_2 : Creatine kinase M-type:Creatine kinase B-type heterodimer

2.0 2.5 3.0 3.5 4.0 4.5

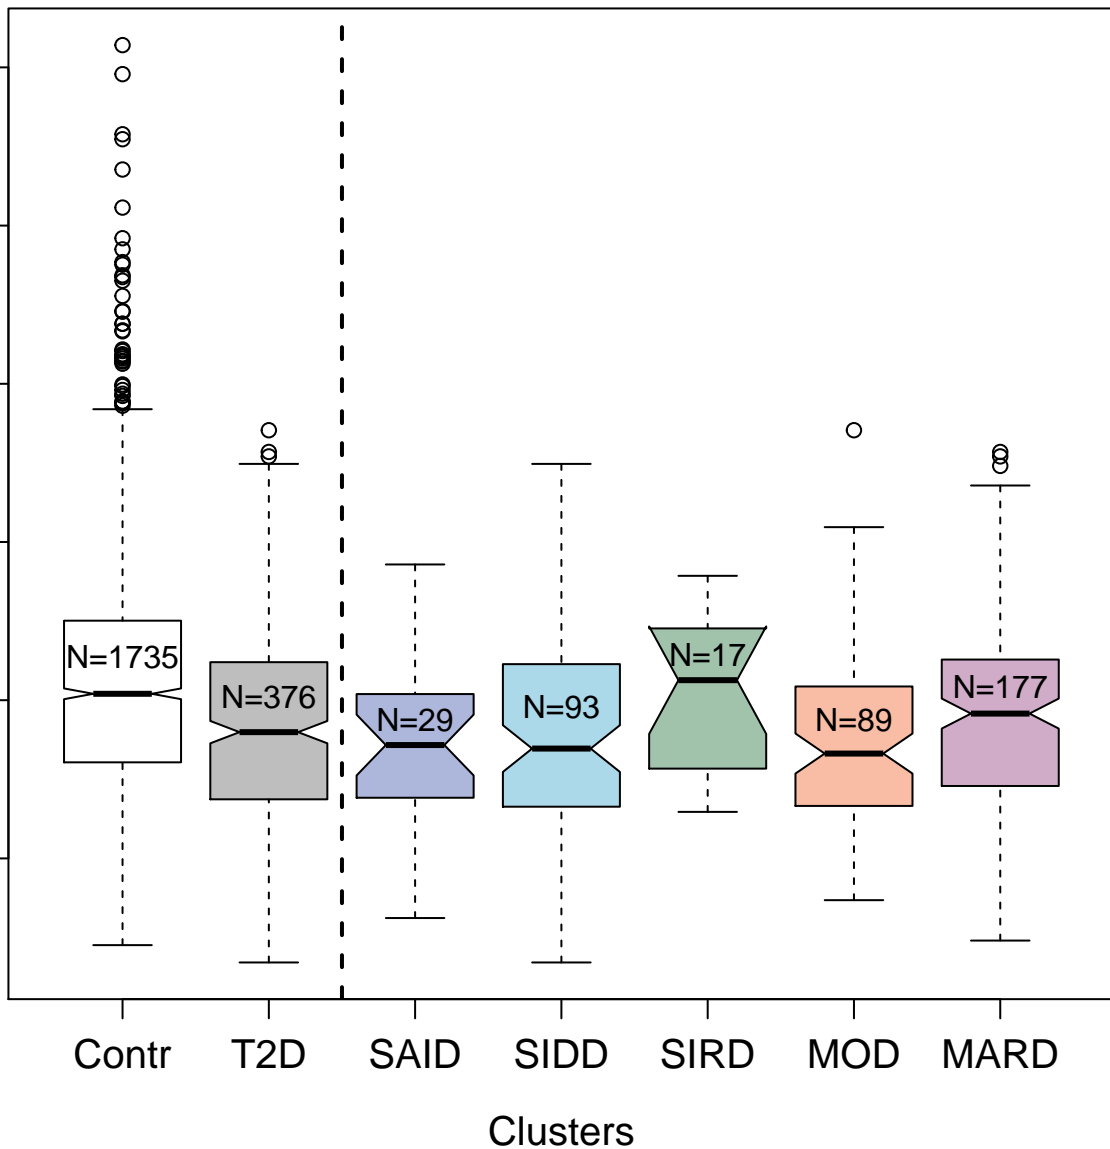



4976-57\_1 : Adapter molecule crk

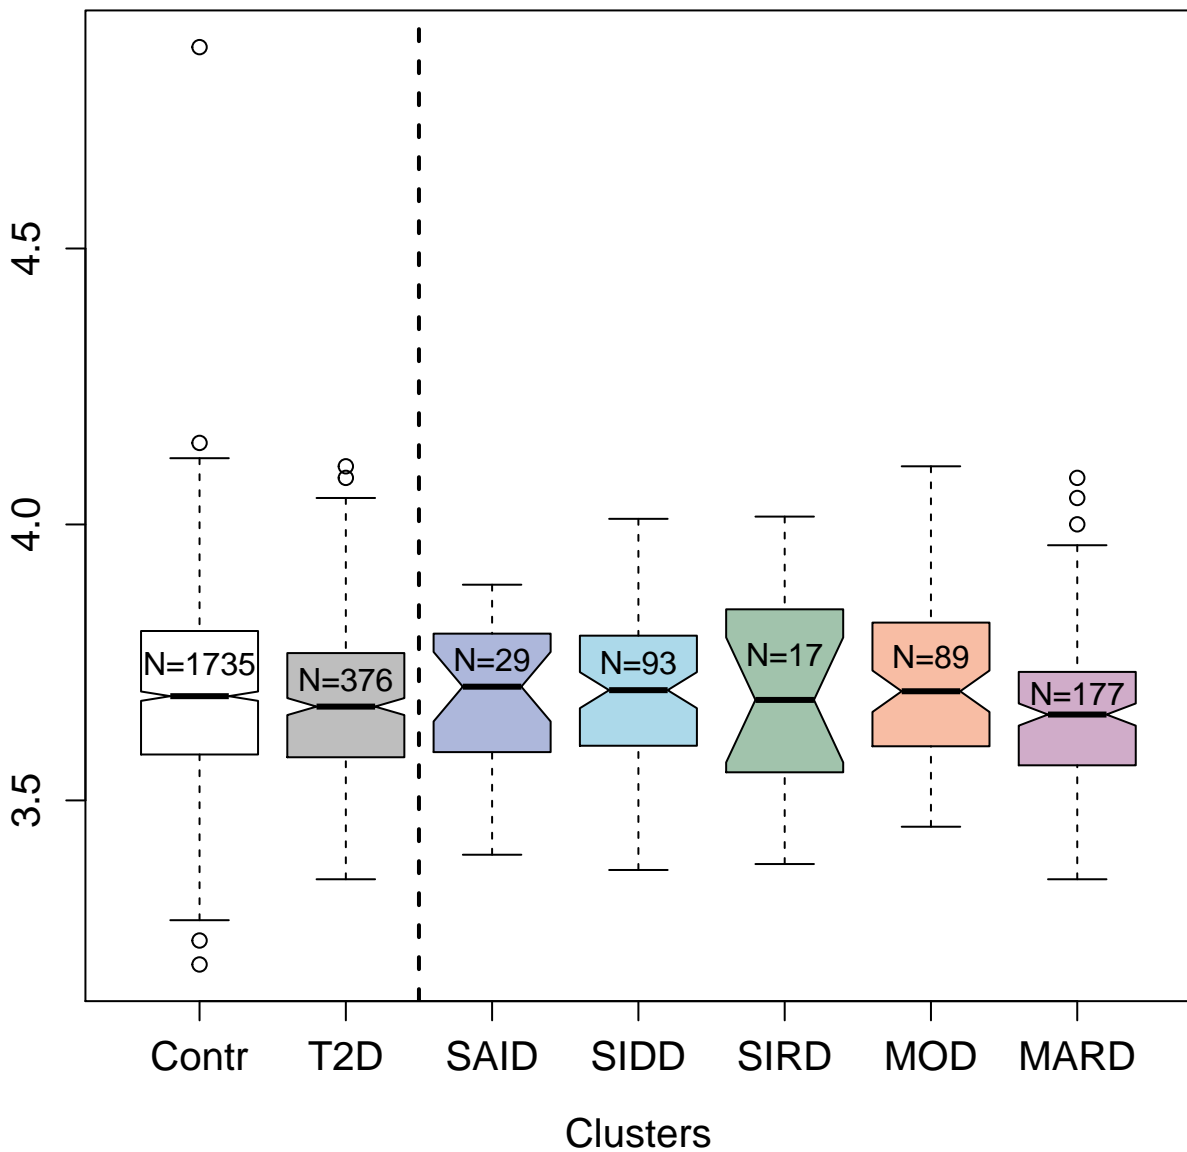

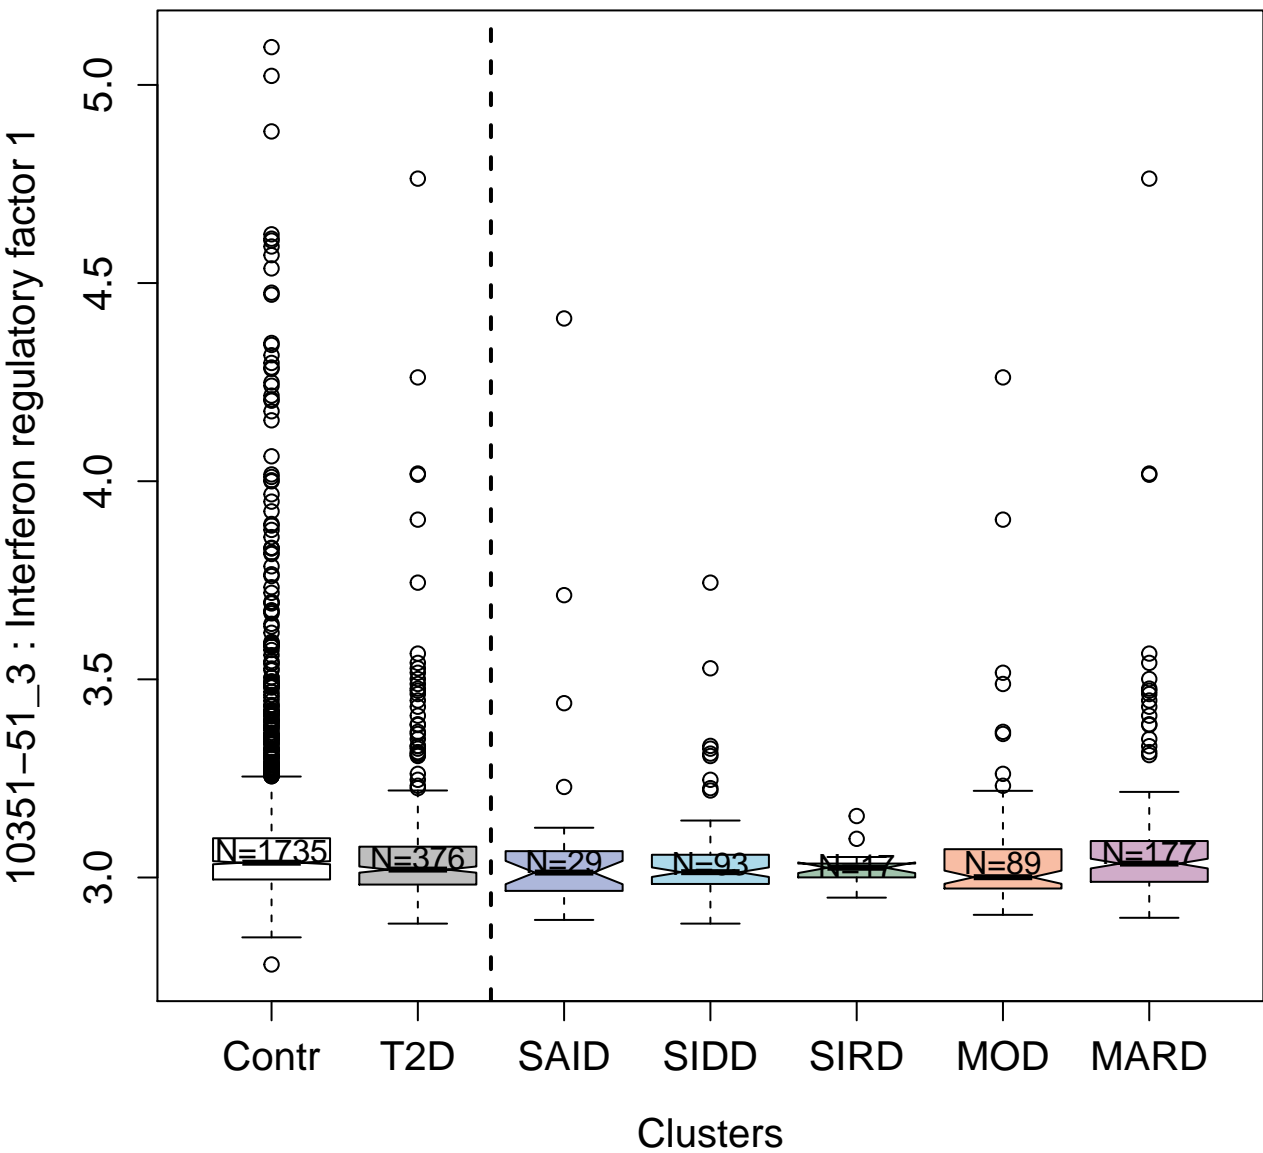

14132-21\_3 : HERV-H LTR-associating protein 2

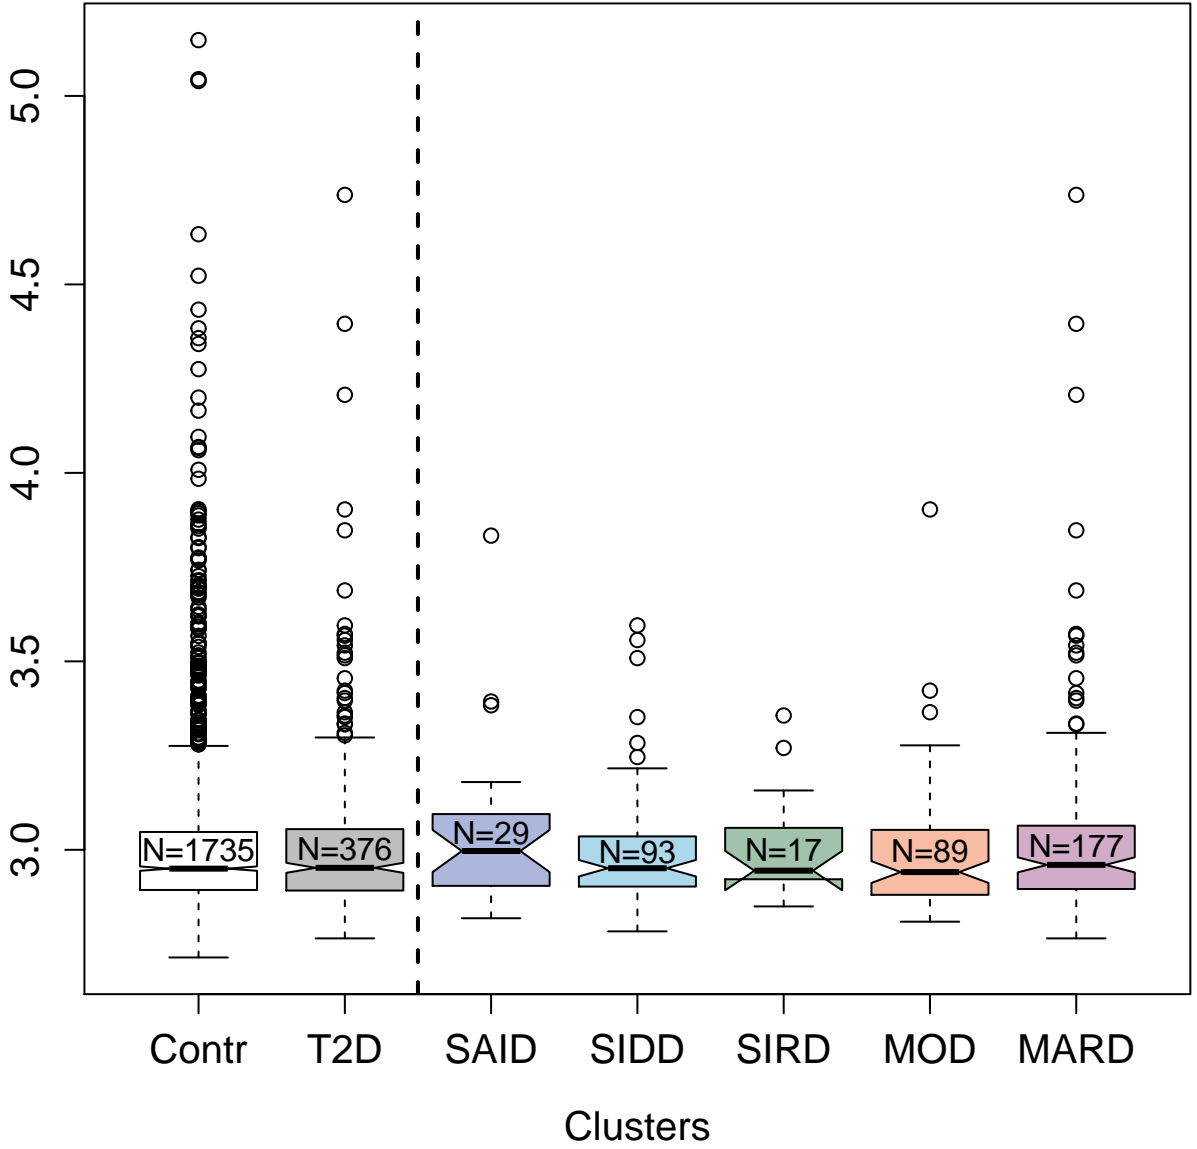

# 4429-51\_2 : Carbohydrate sulfotransferase 6

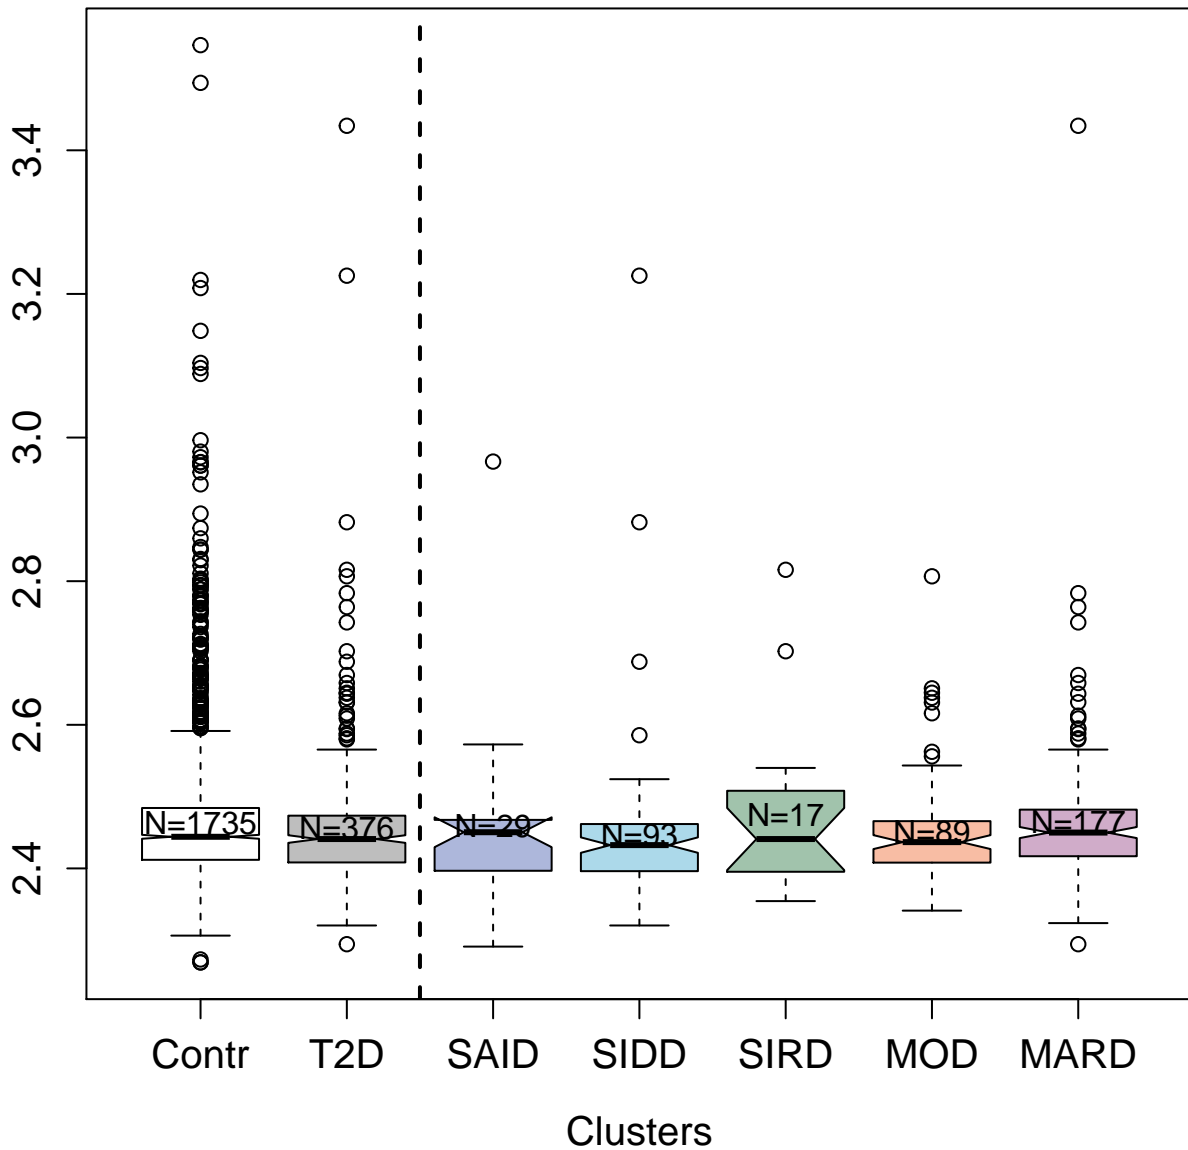

3881-49\_2 : Dynein light chain 1; cytoplasmic

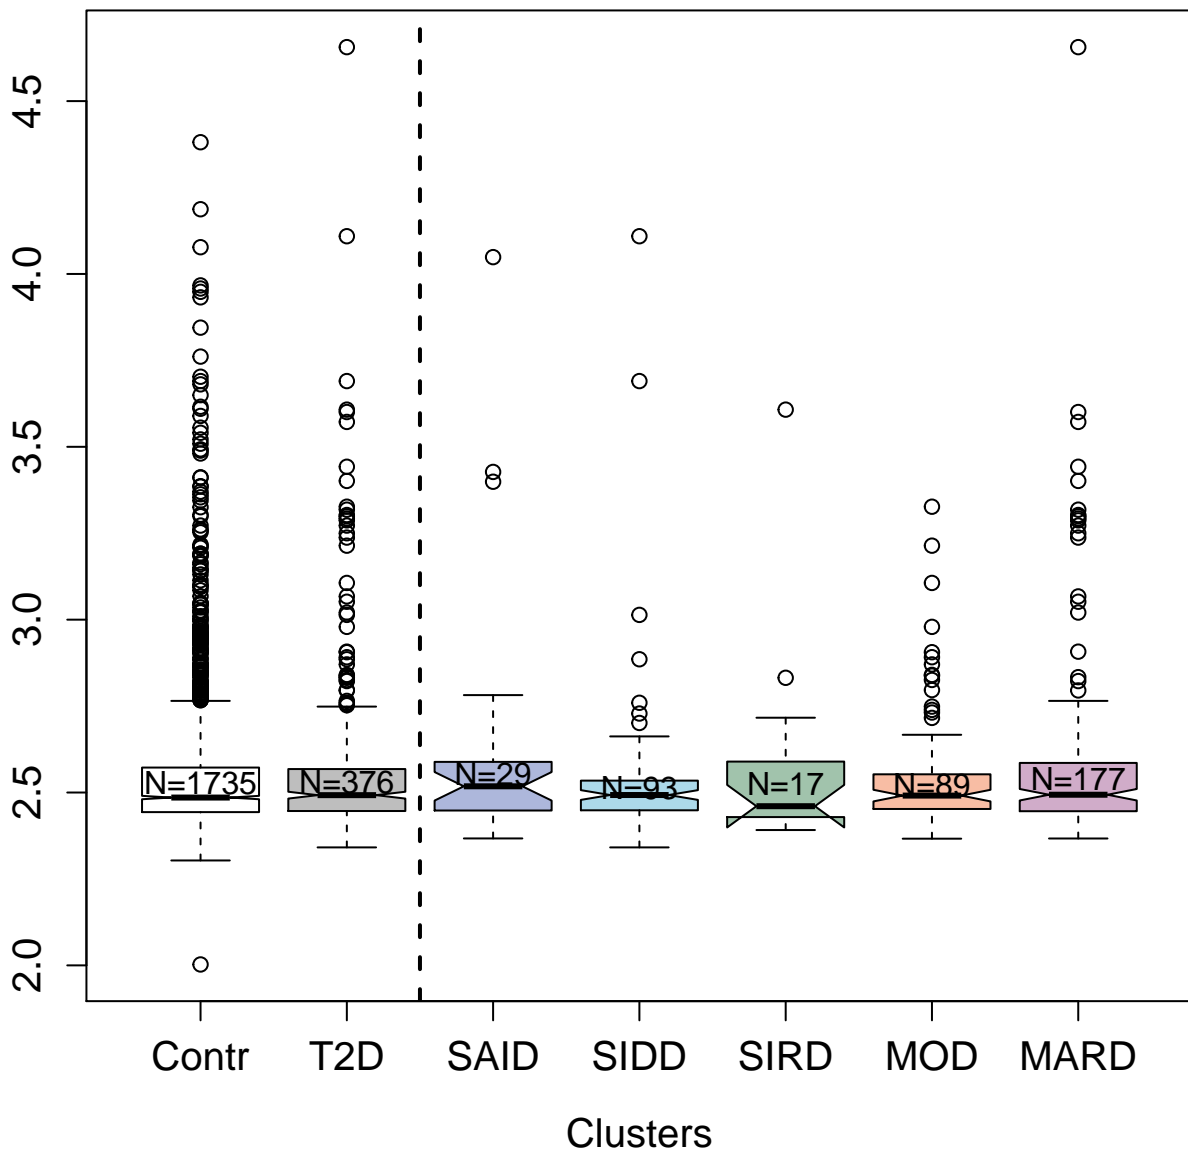

14123-34\_3 : Platelet receptor Gi24

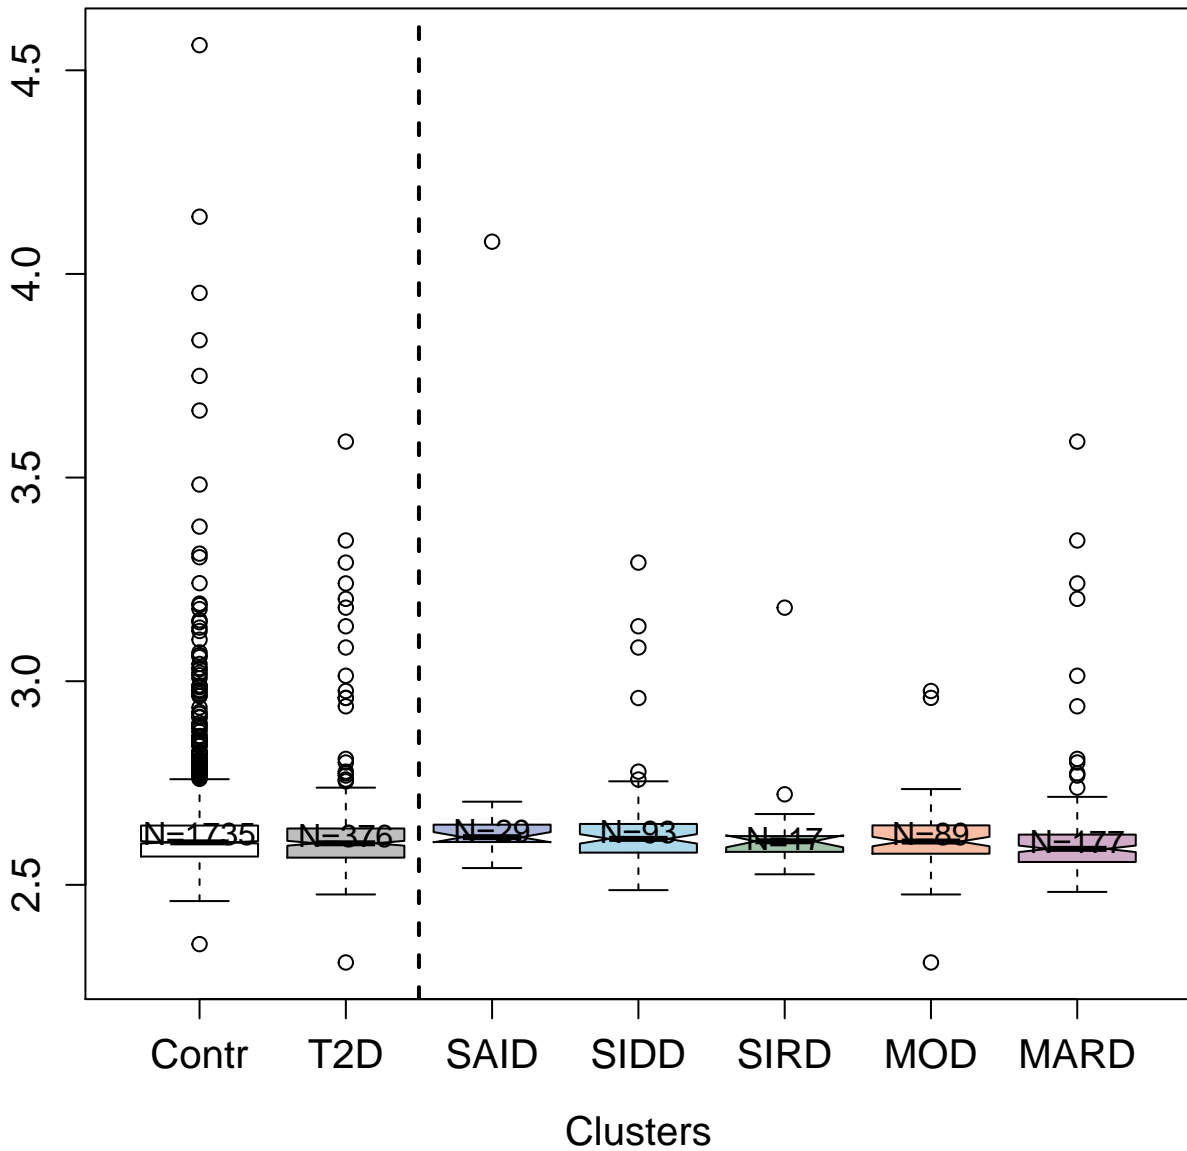



4324-33\_2 : Cystatin-SA

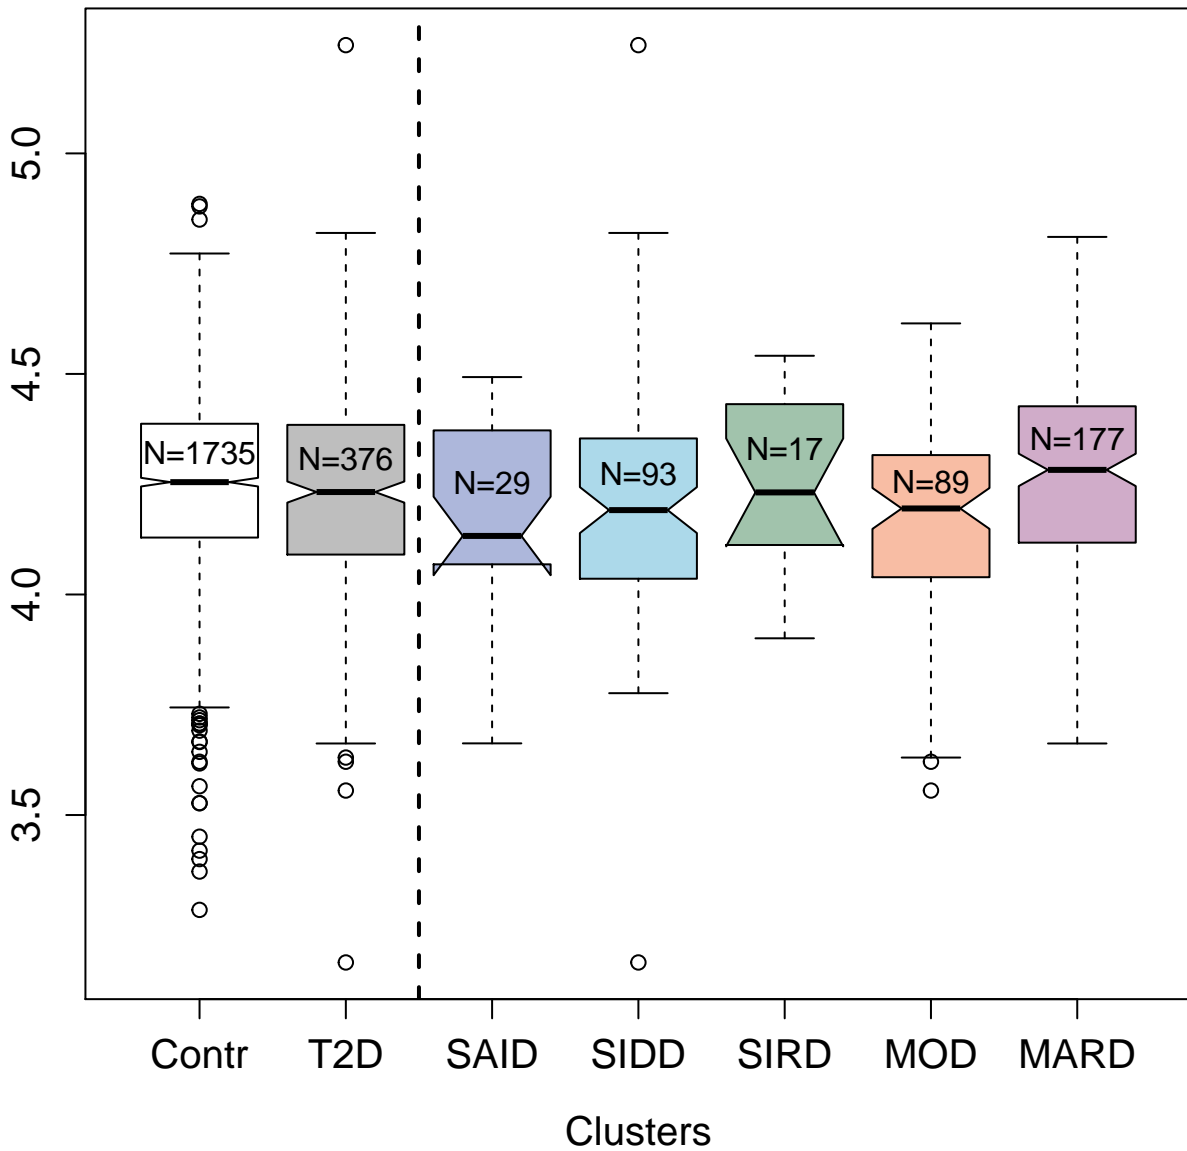

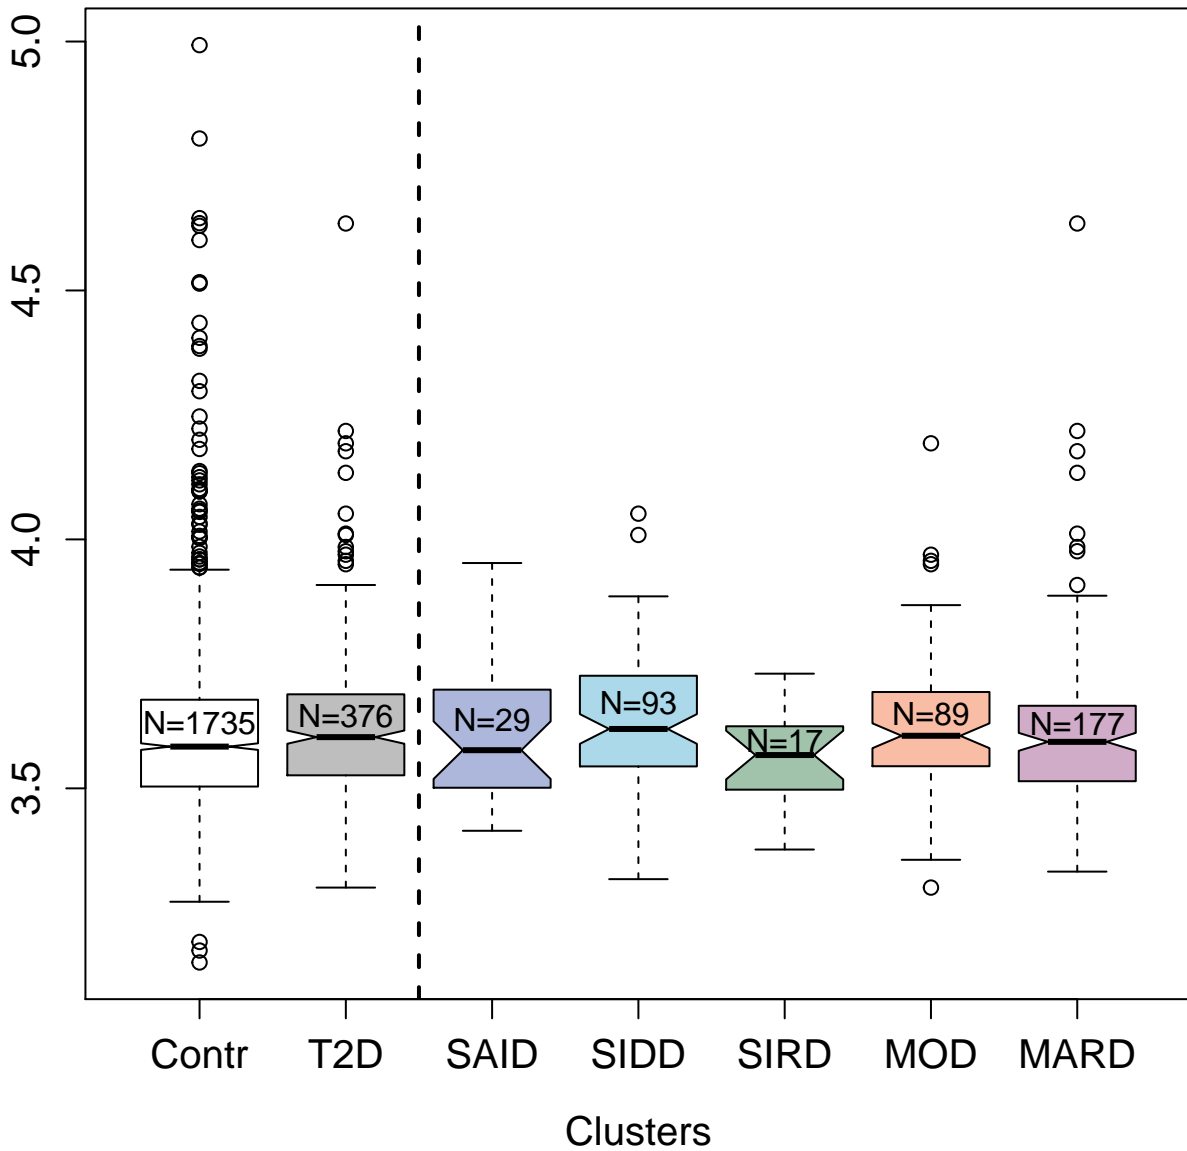

4903-72\_1 : Calcineurin

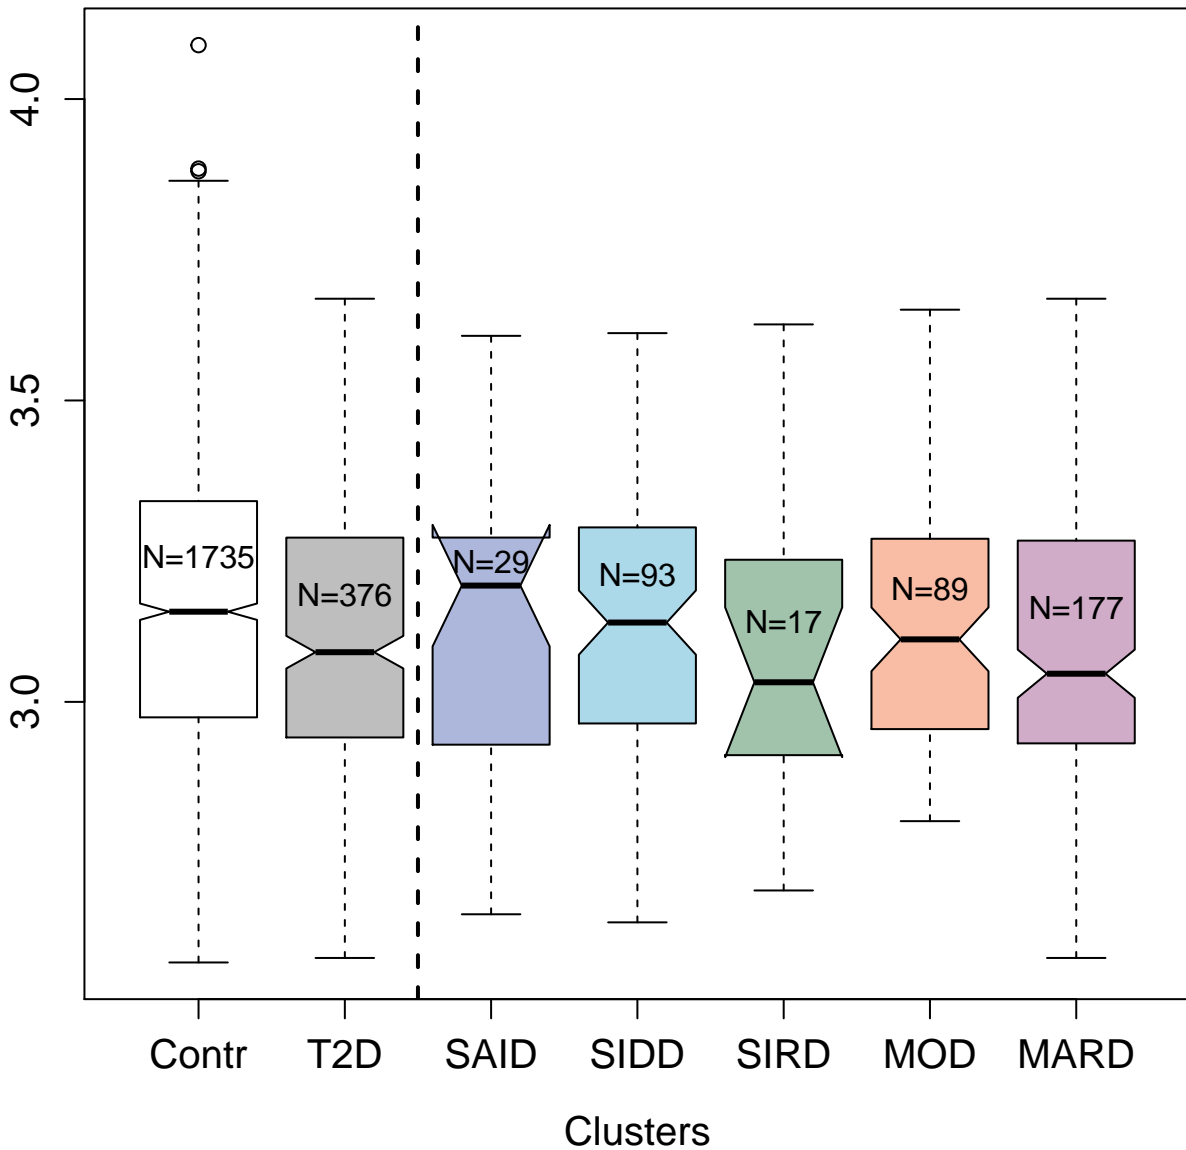

4562-1\_2 : Neurexophilin-1

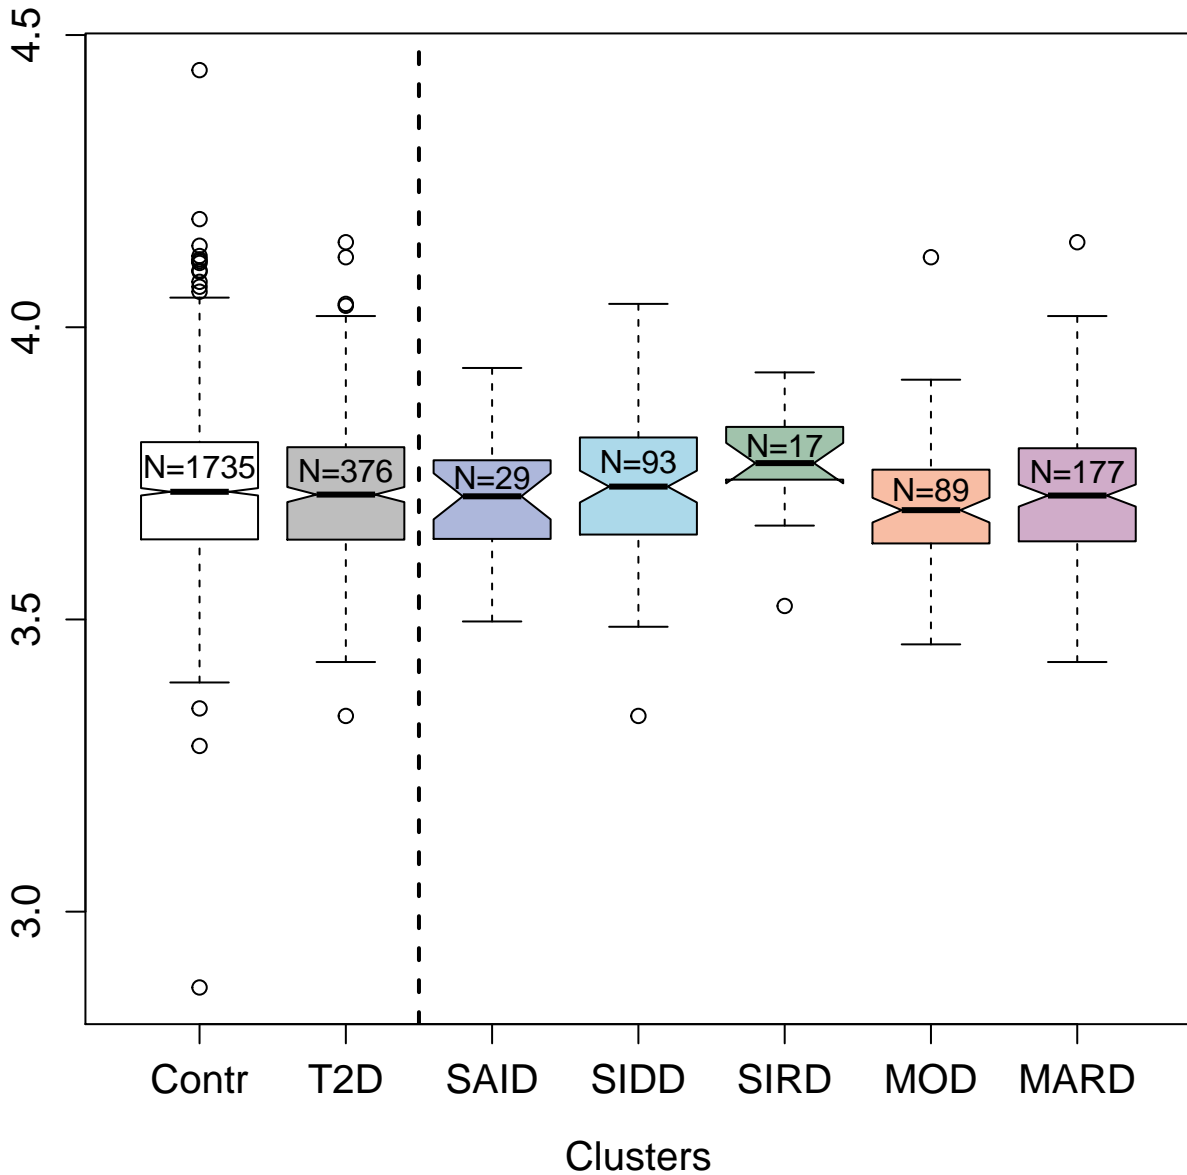

3437-80\_3 : Receptor-type tyrosine-protein kinase  
FLT3

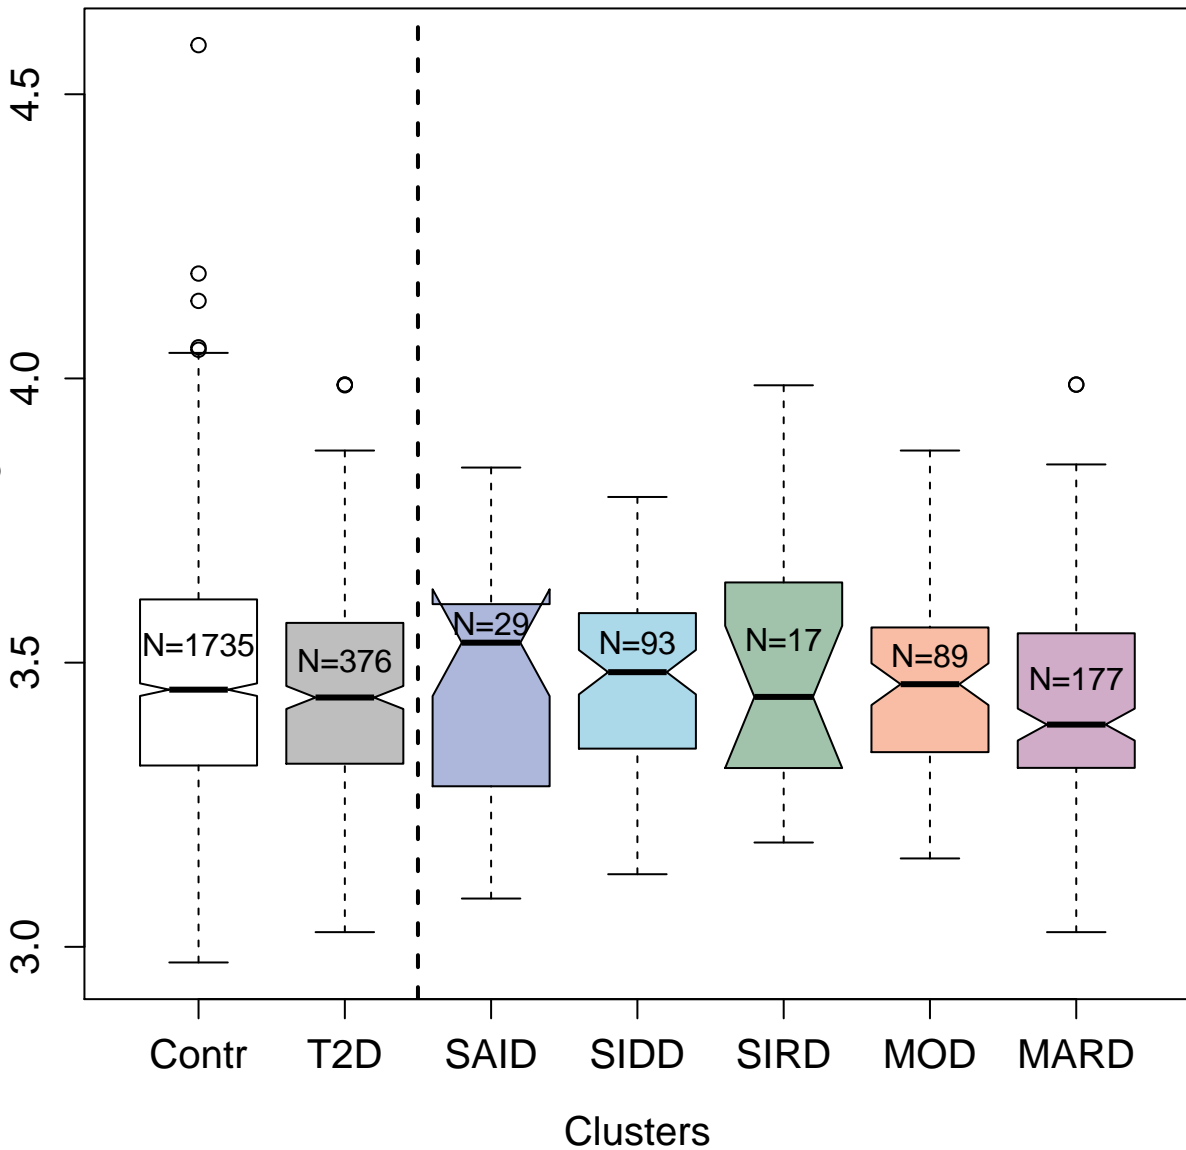

5016-61\_2 : Protein deglycase DJ-1

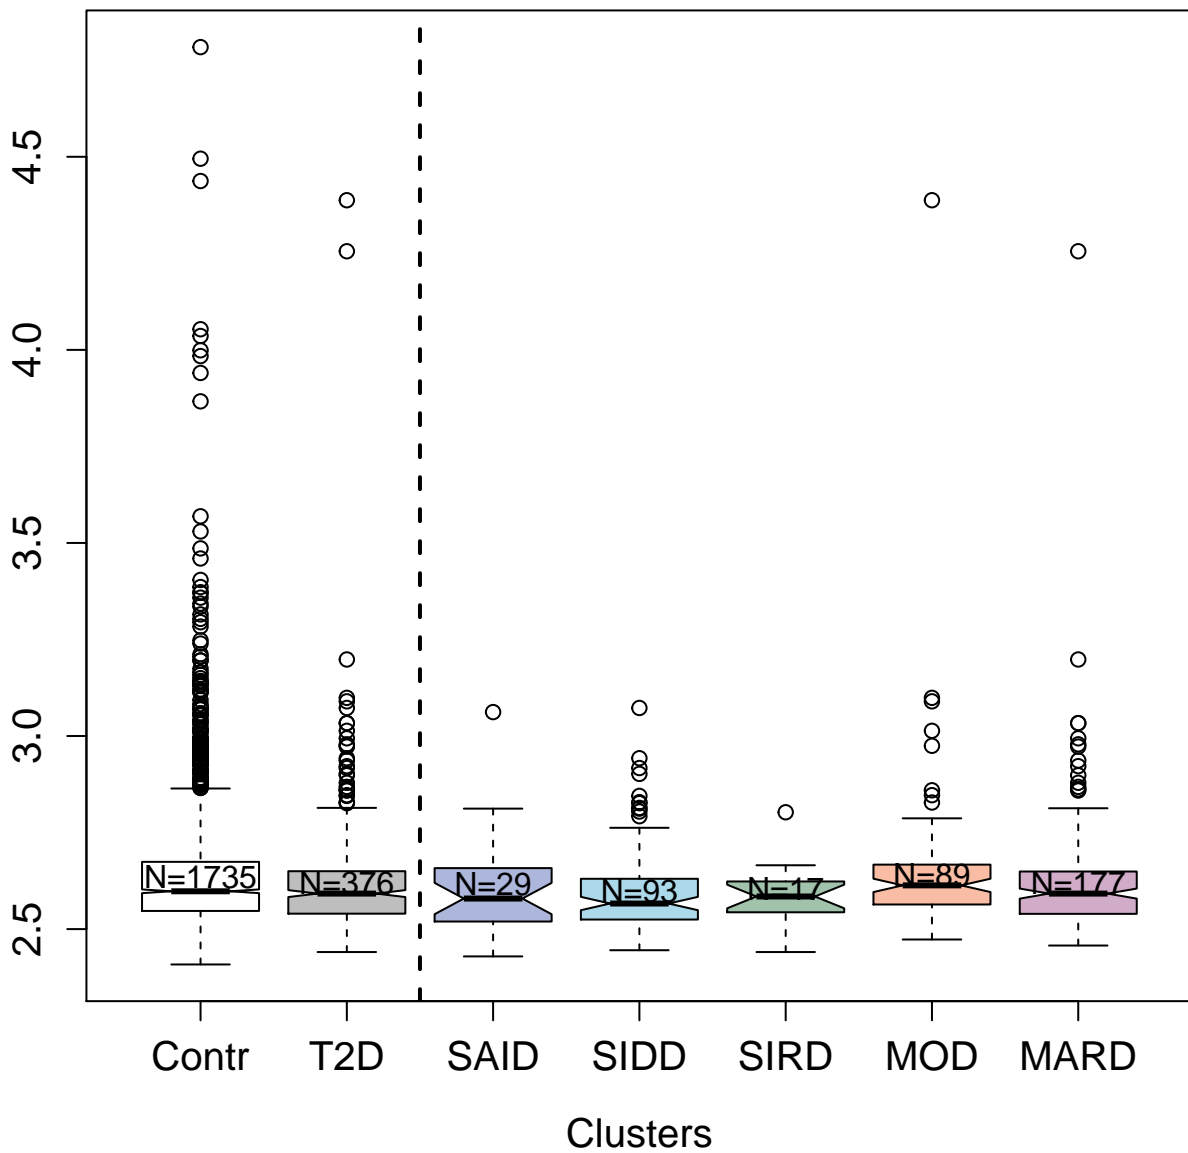

3187-52\_2 : Cysteine-rich secretory protein 3

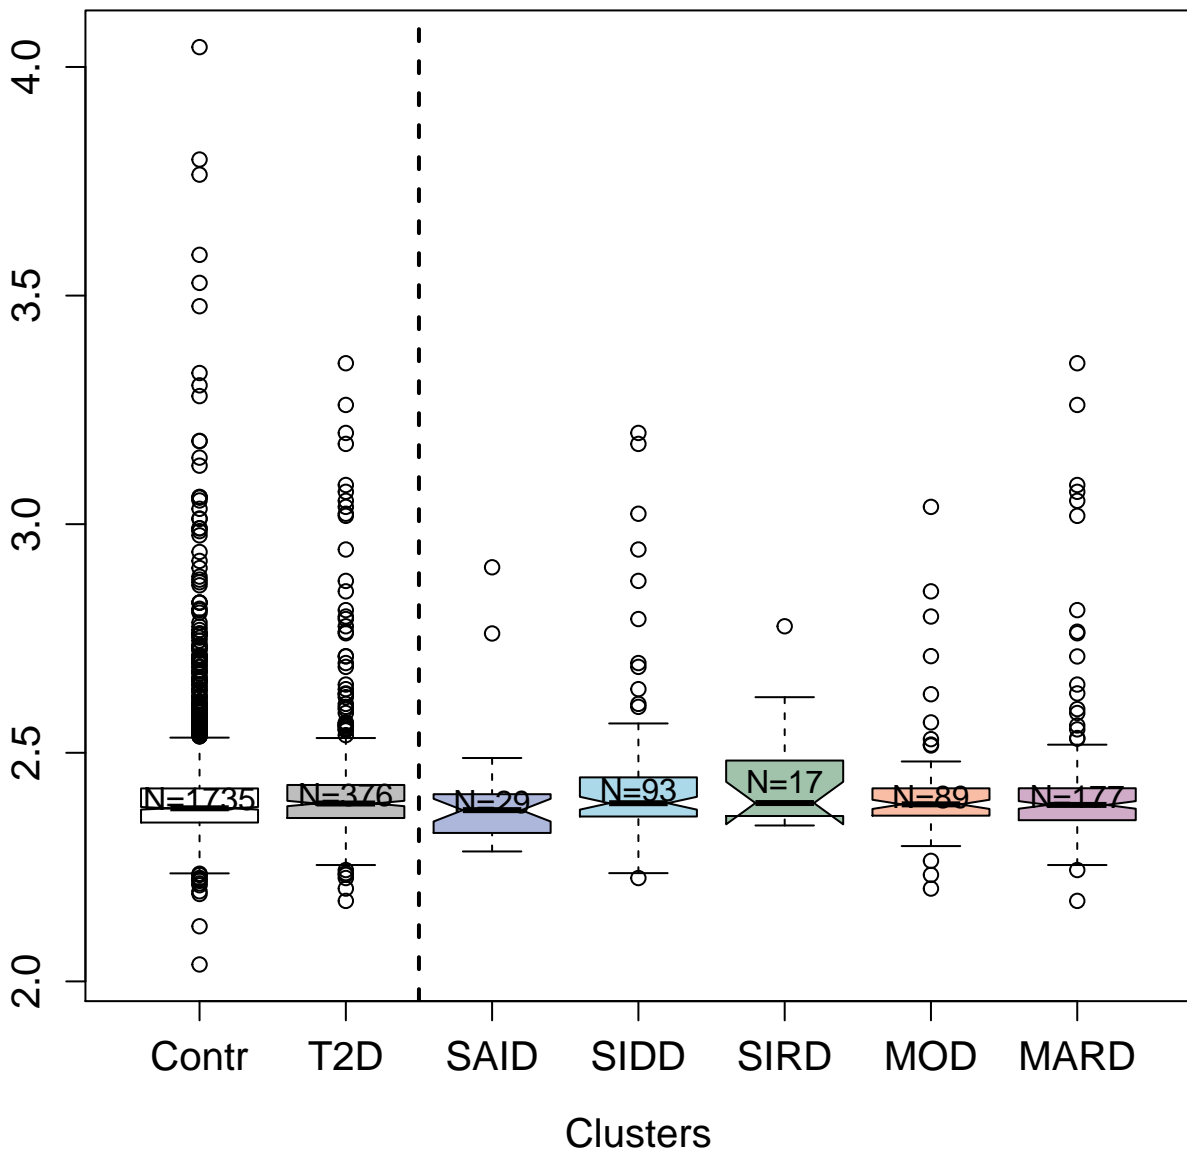

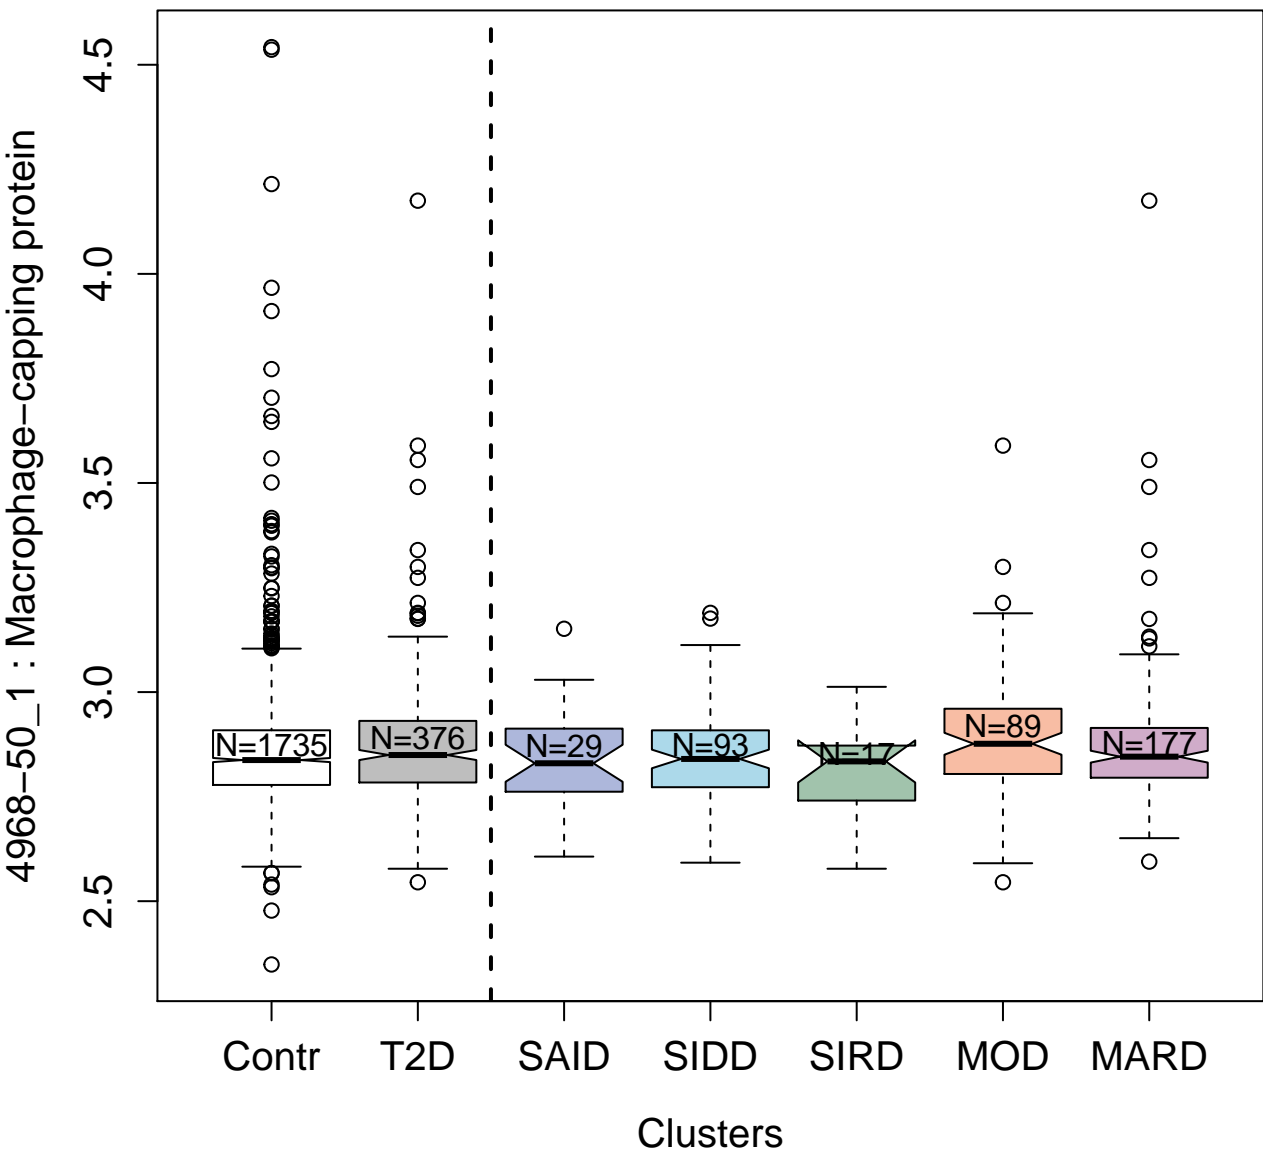



5124-69\_3 : Intercellular adhesion molecule 5

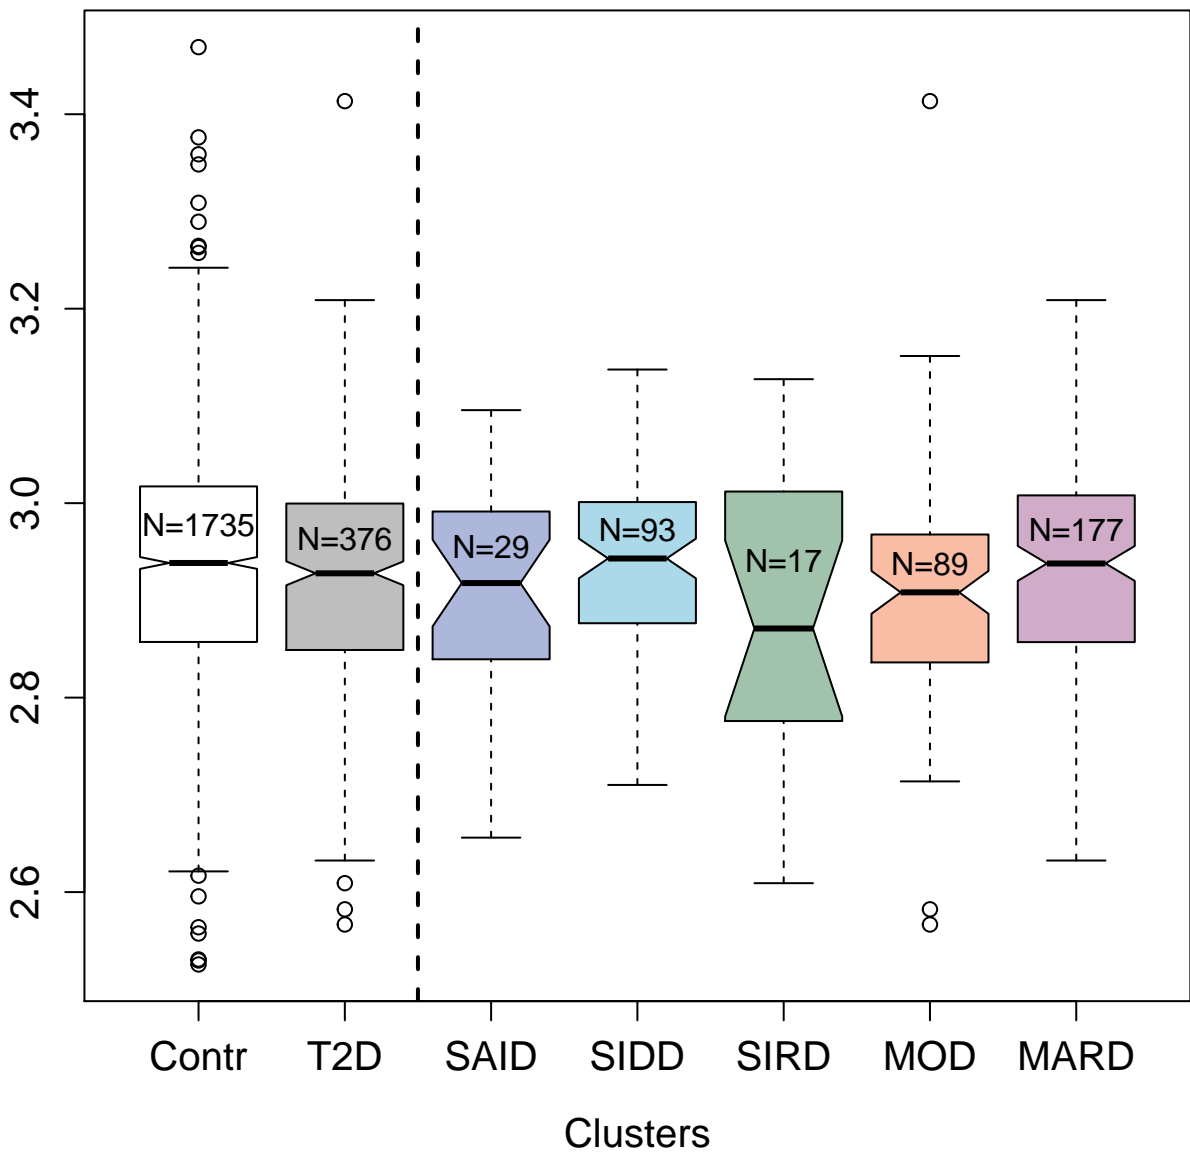

4721-54\_2 : Trefoil factor 3

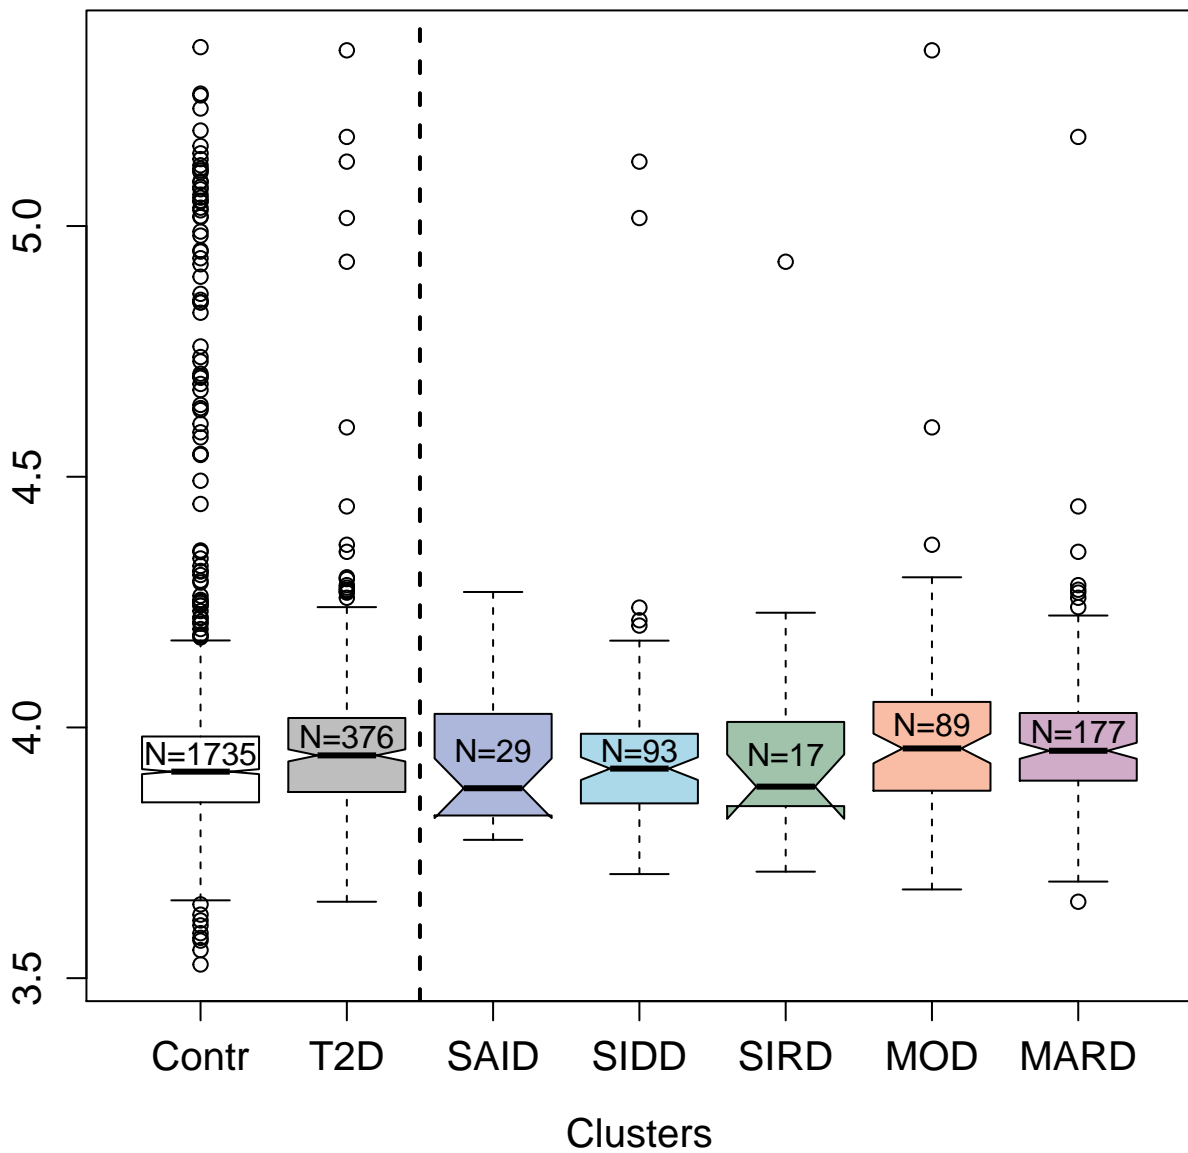

3867-49\_1 : Seizure 6-like protein 2

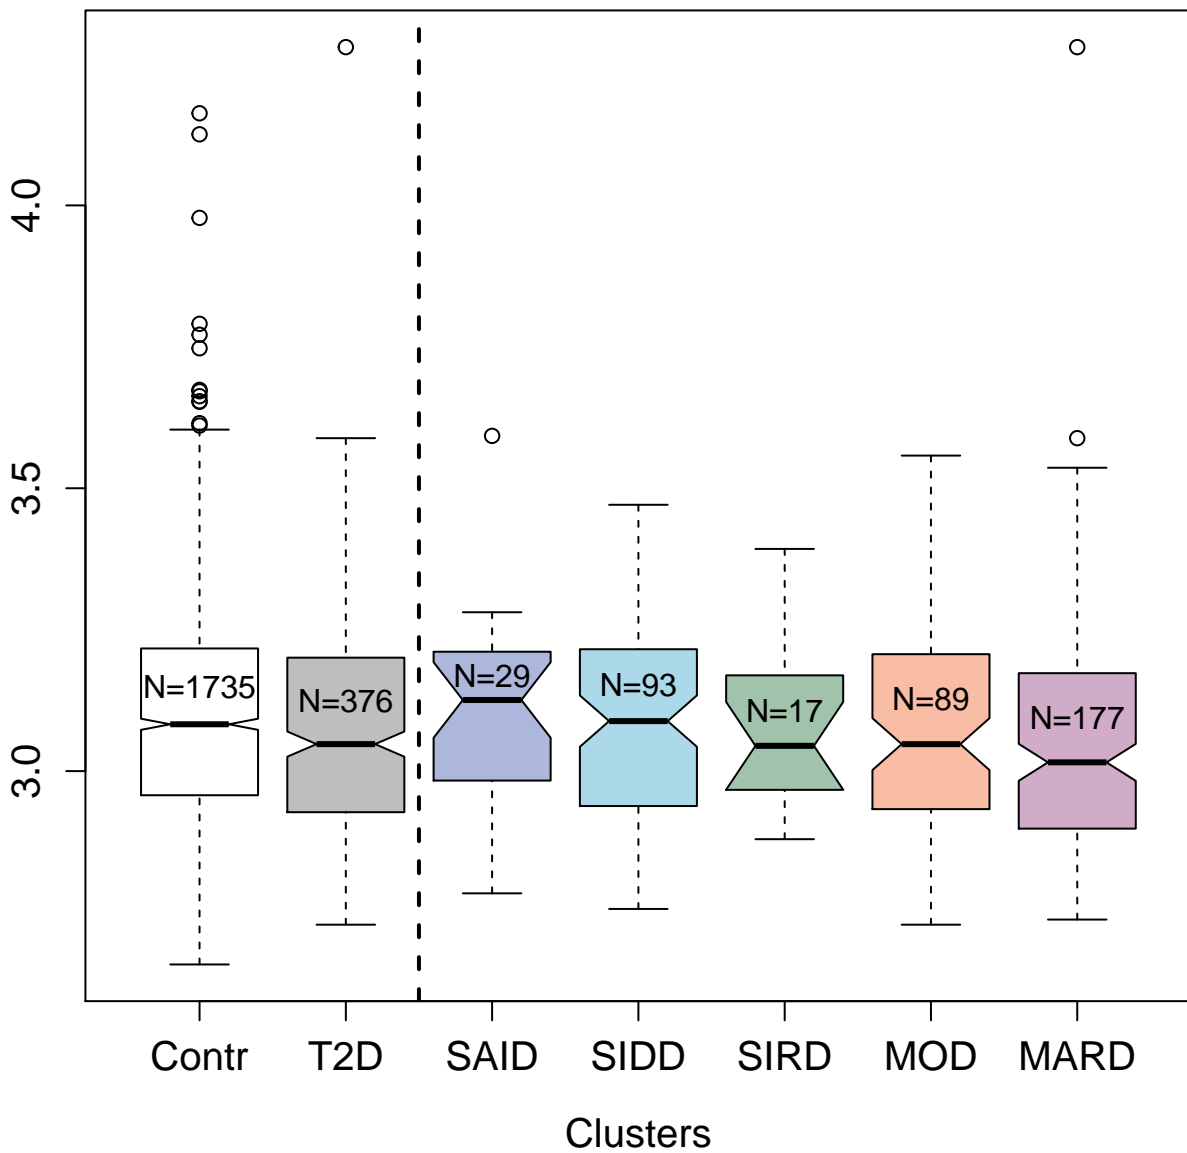

13089-6\_3 : Hypoxia-inducible factor 1-alpha

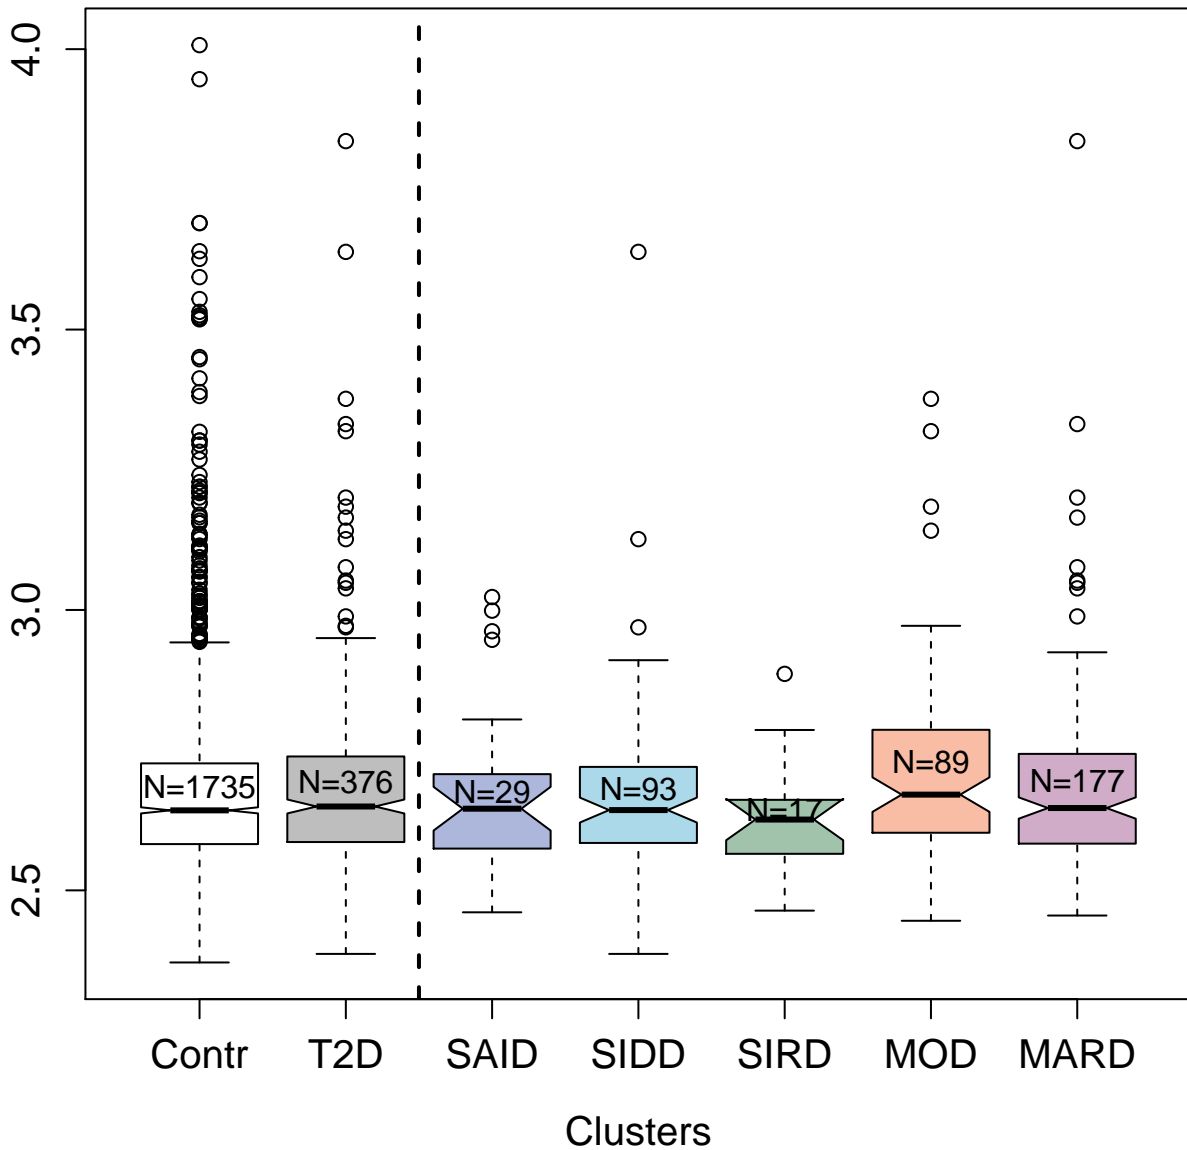

2500-2\_3 : Angiopoietin-4

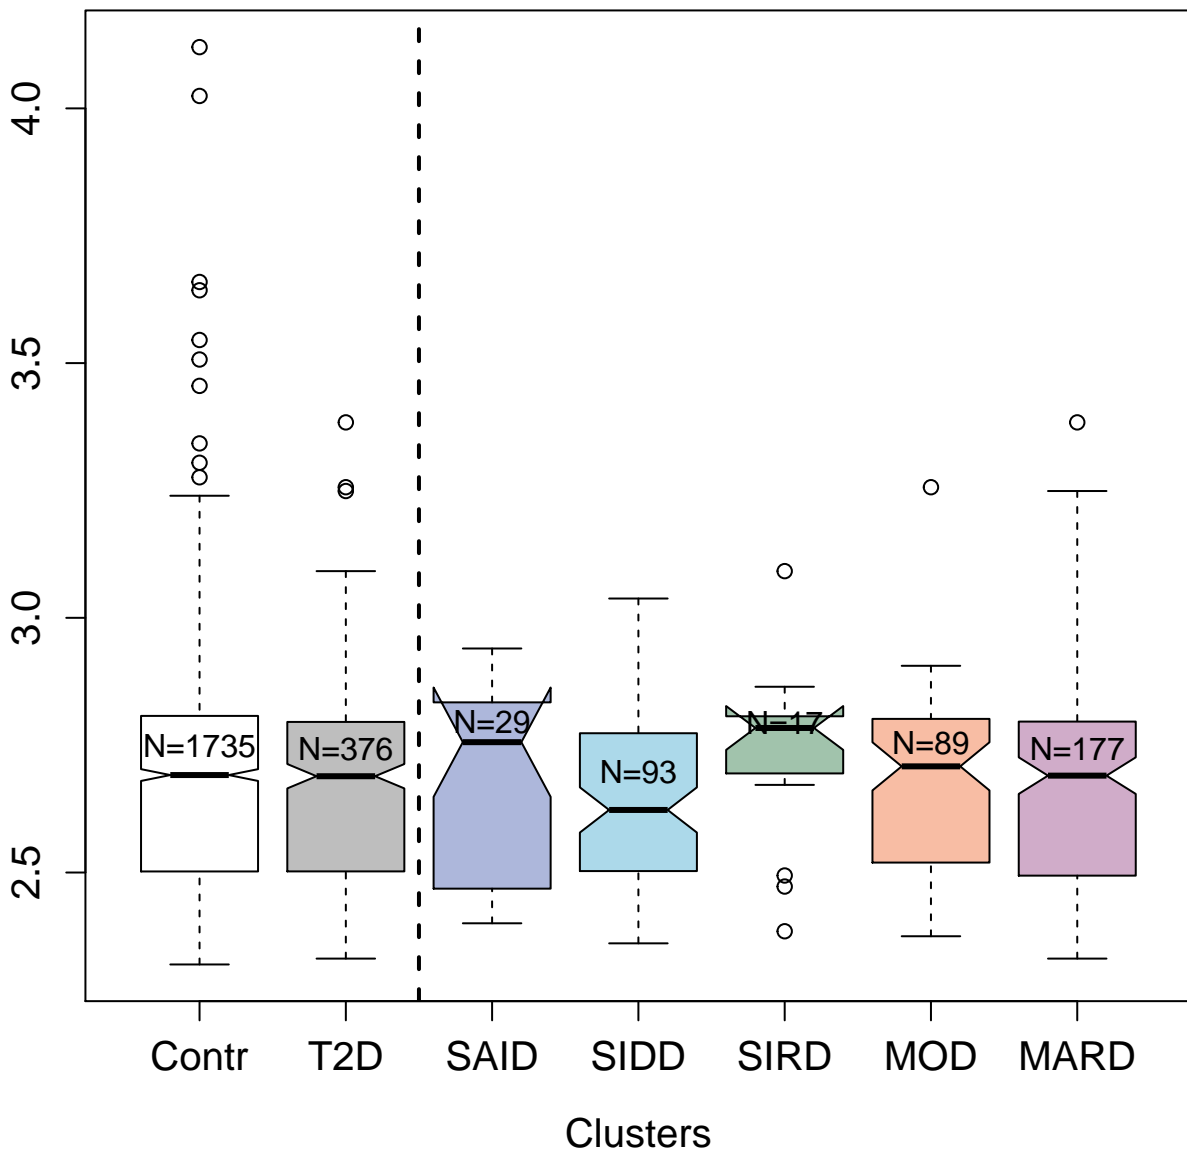

5106-52\_3 : Neurogenic locus notch homolog

protein 2

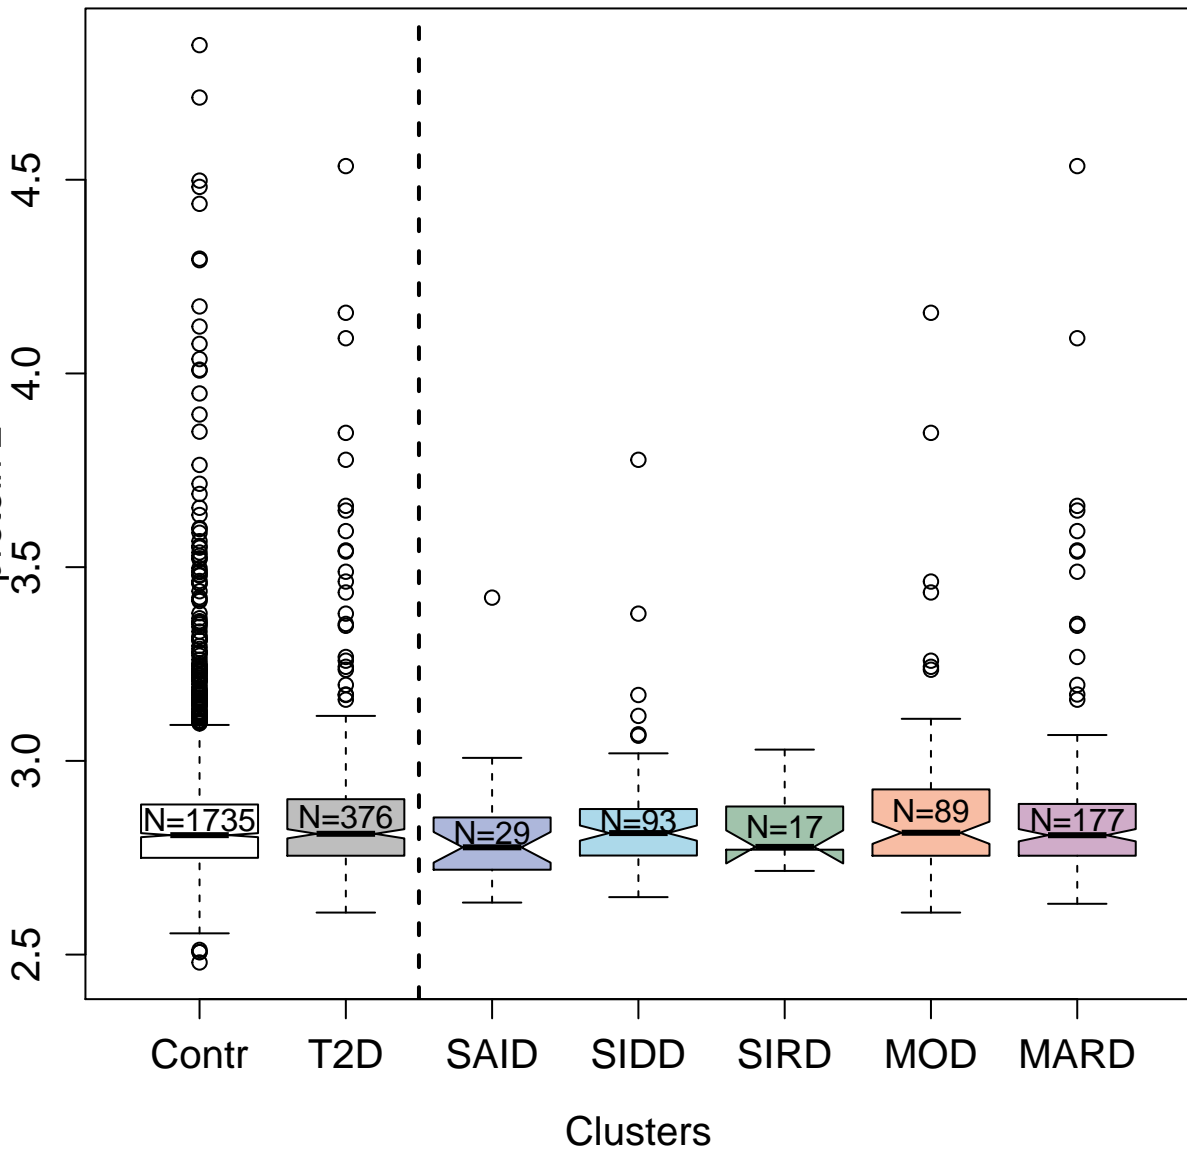

4450-26\_2 : Heterogeneous nuclear  
ribonucleoprotein A/B

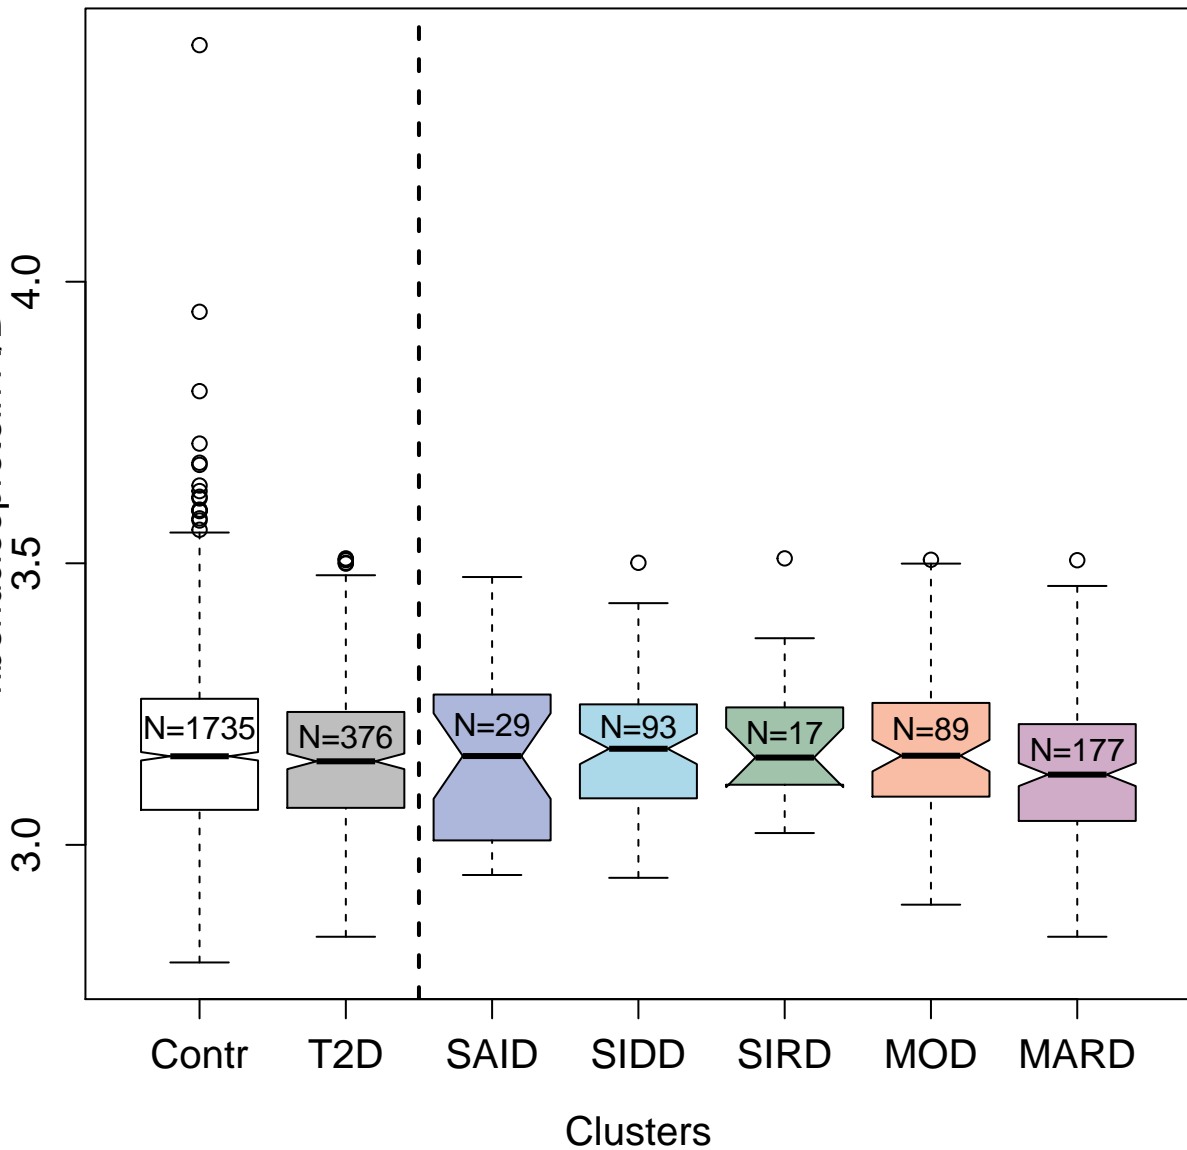

2696-87\_2 : Persephin

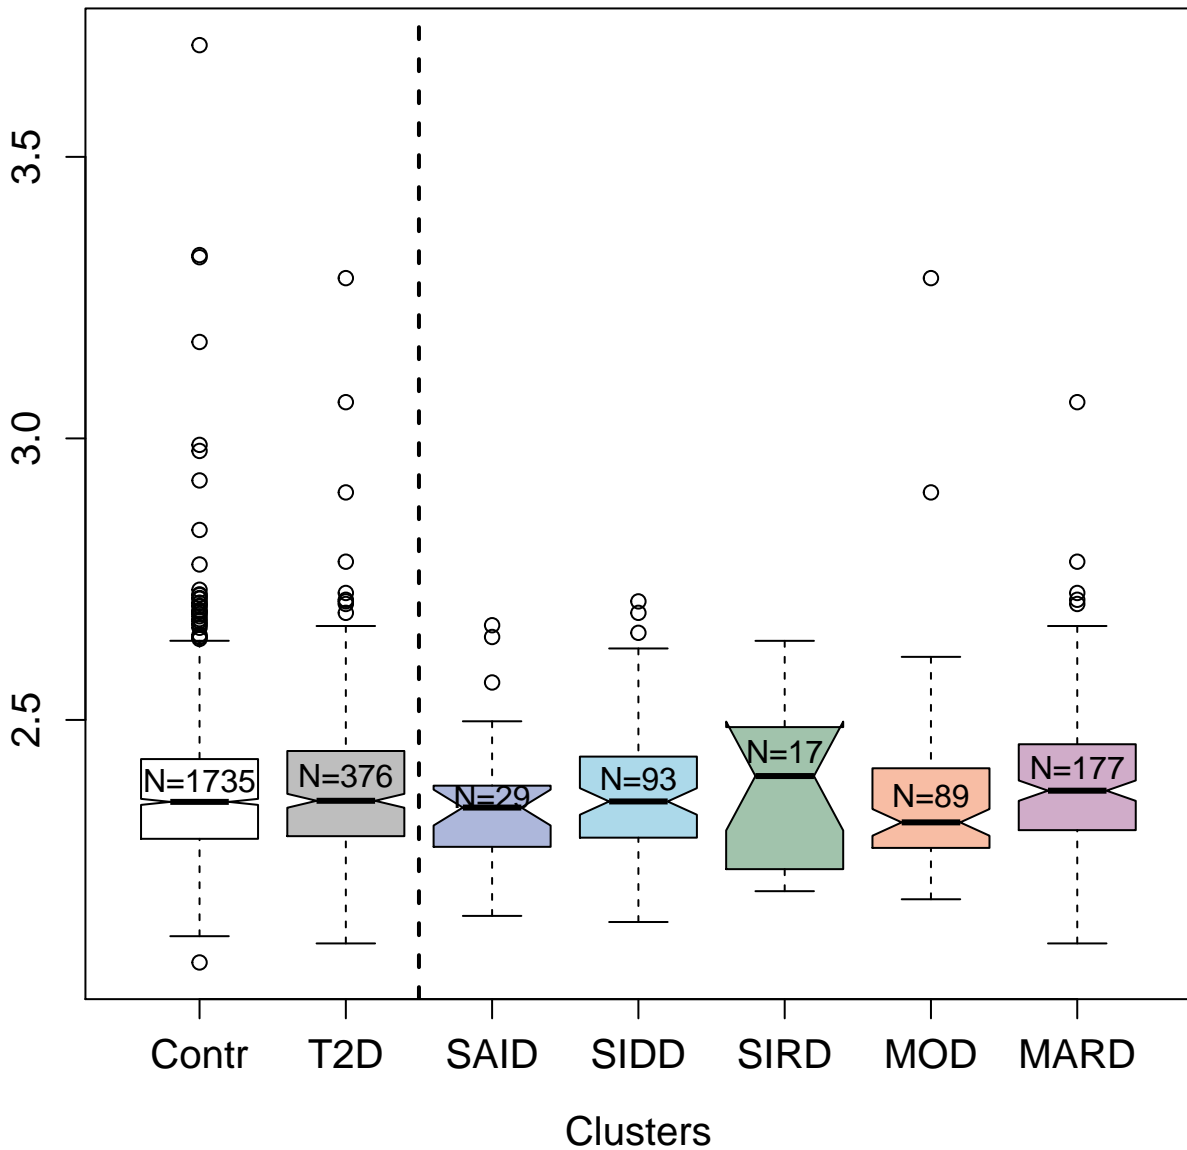



4911-49\_2 : Glutathione S-transferase P

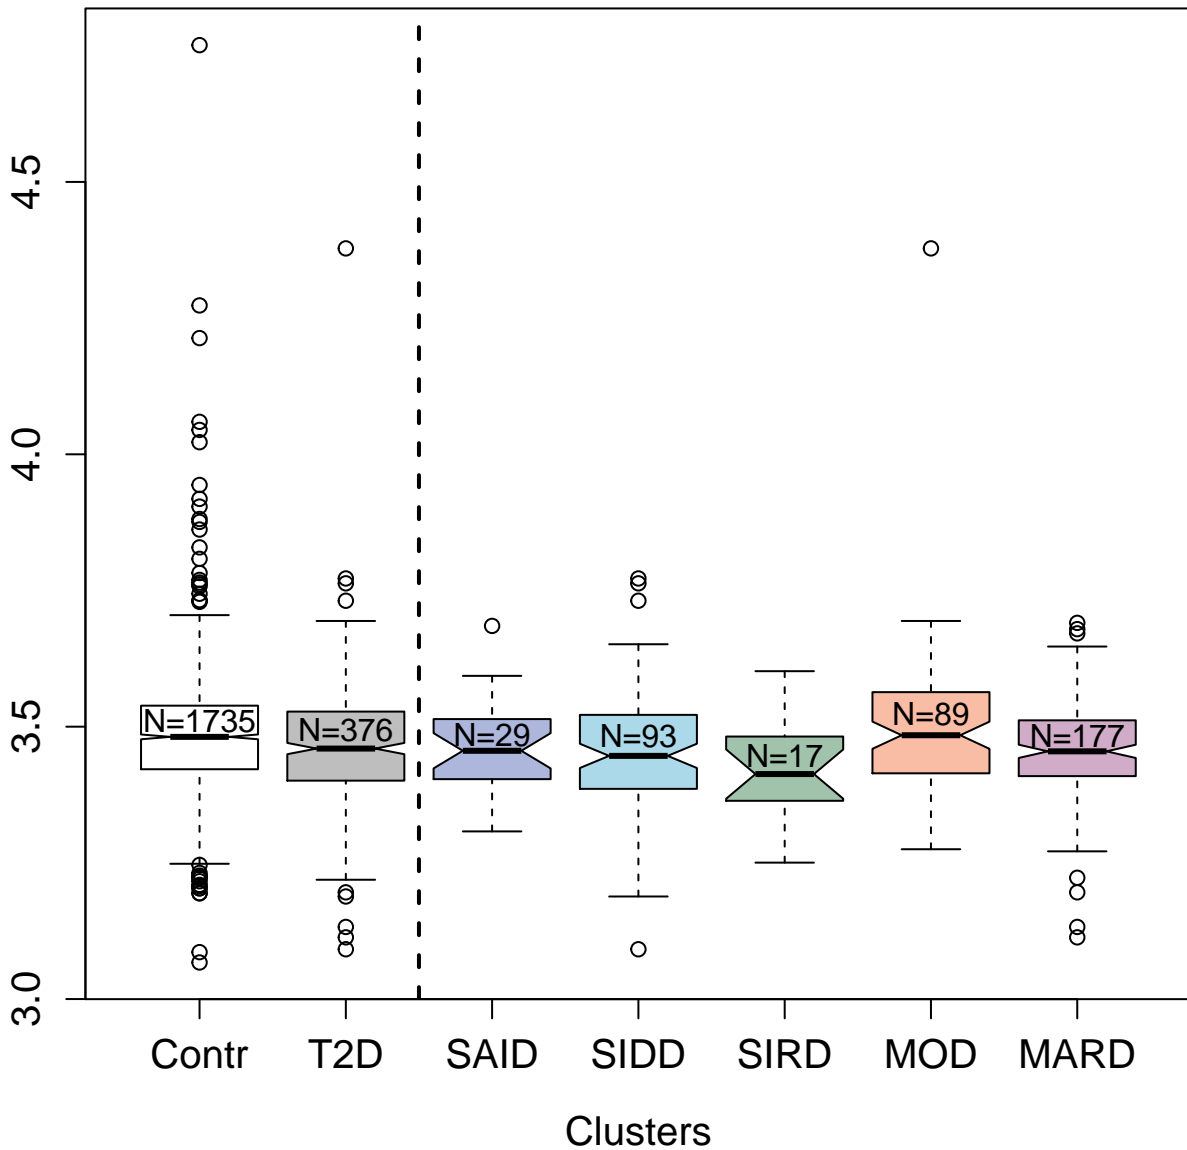

5934-1\_3 : Ferritin

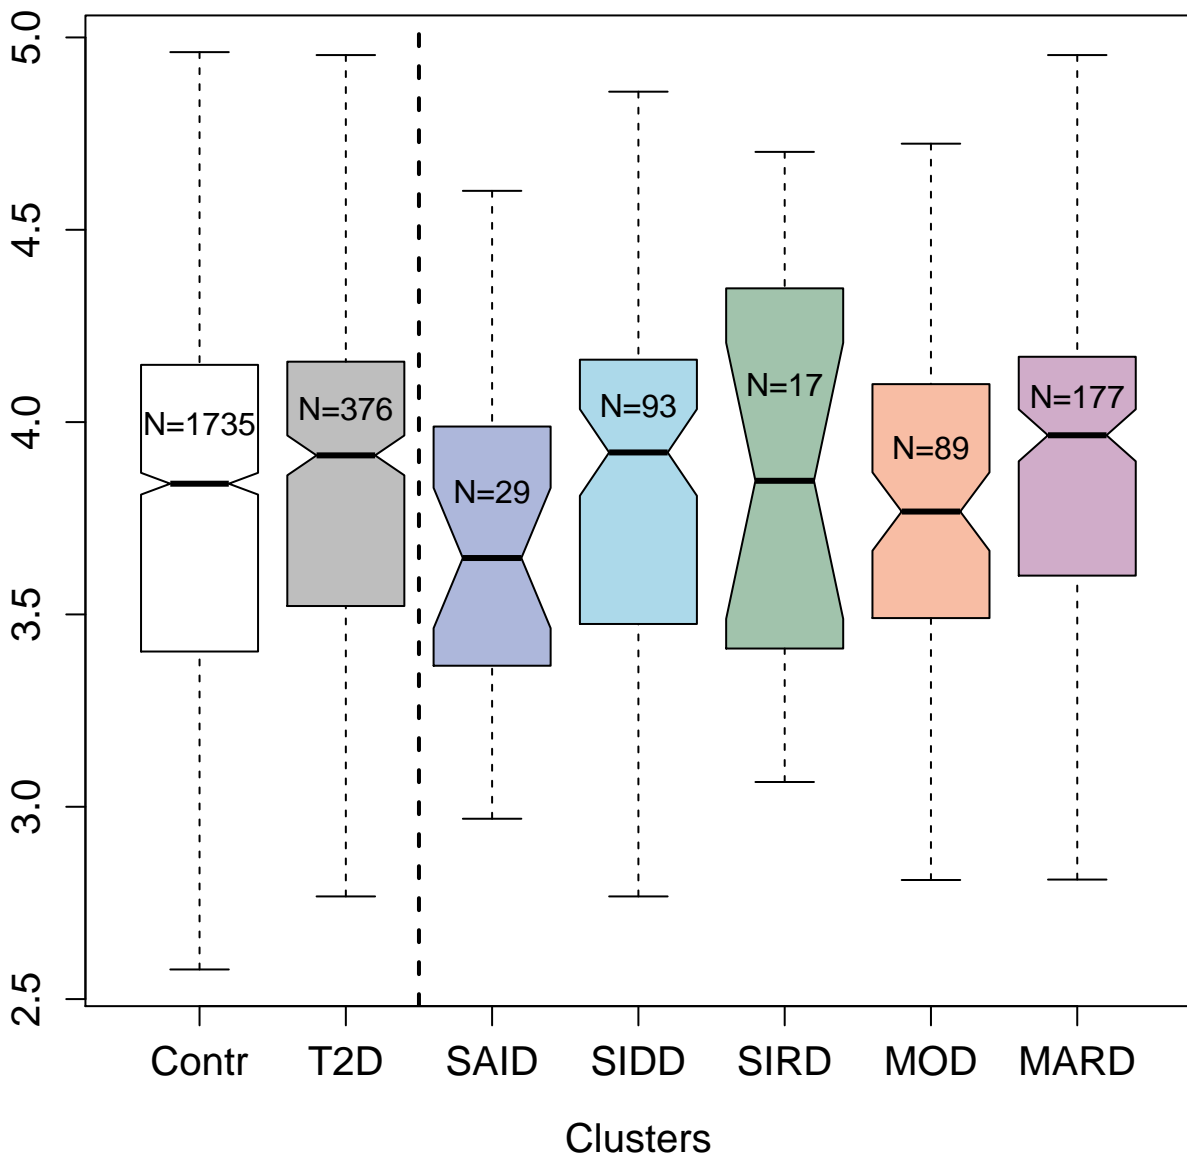

4428-1\_2 : Carbohydrate sulfotransferase 2

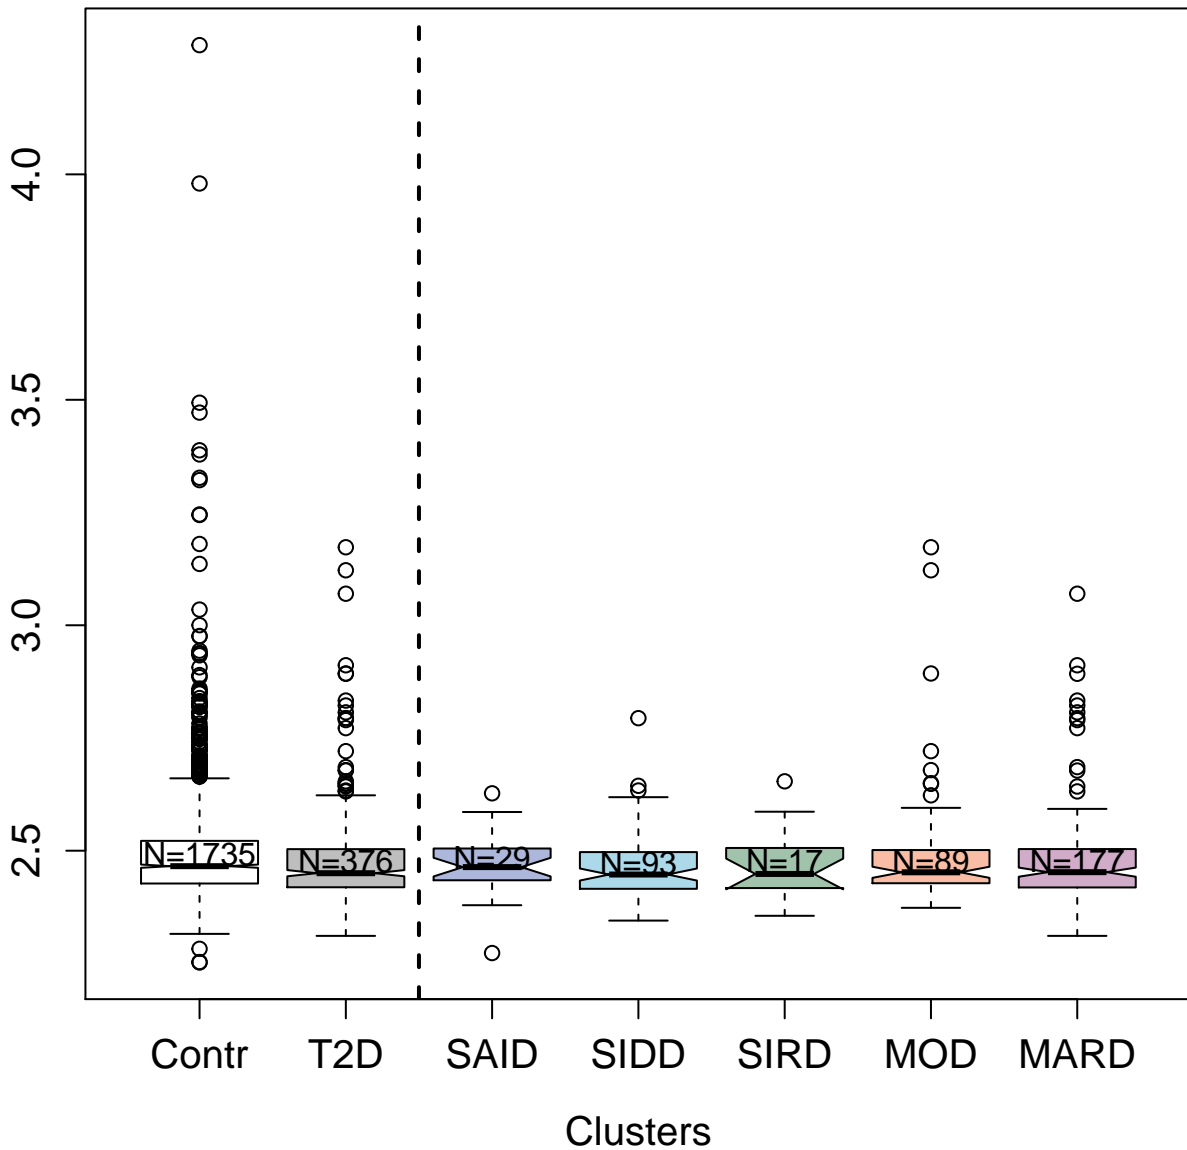

2943-5\_2 : Cytochrome P450 3A4

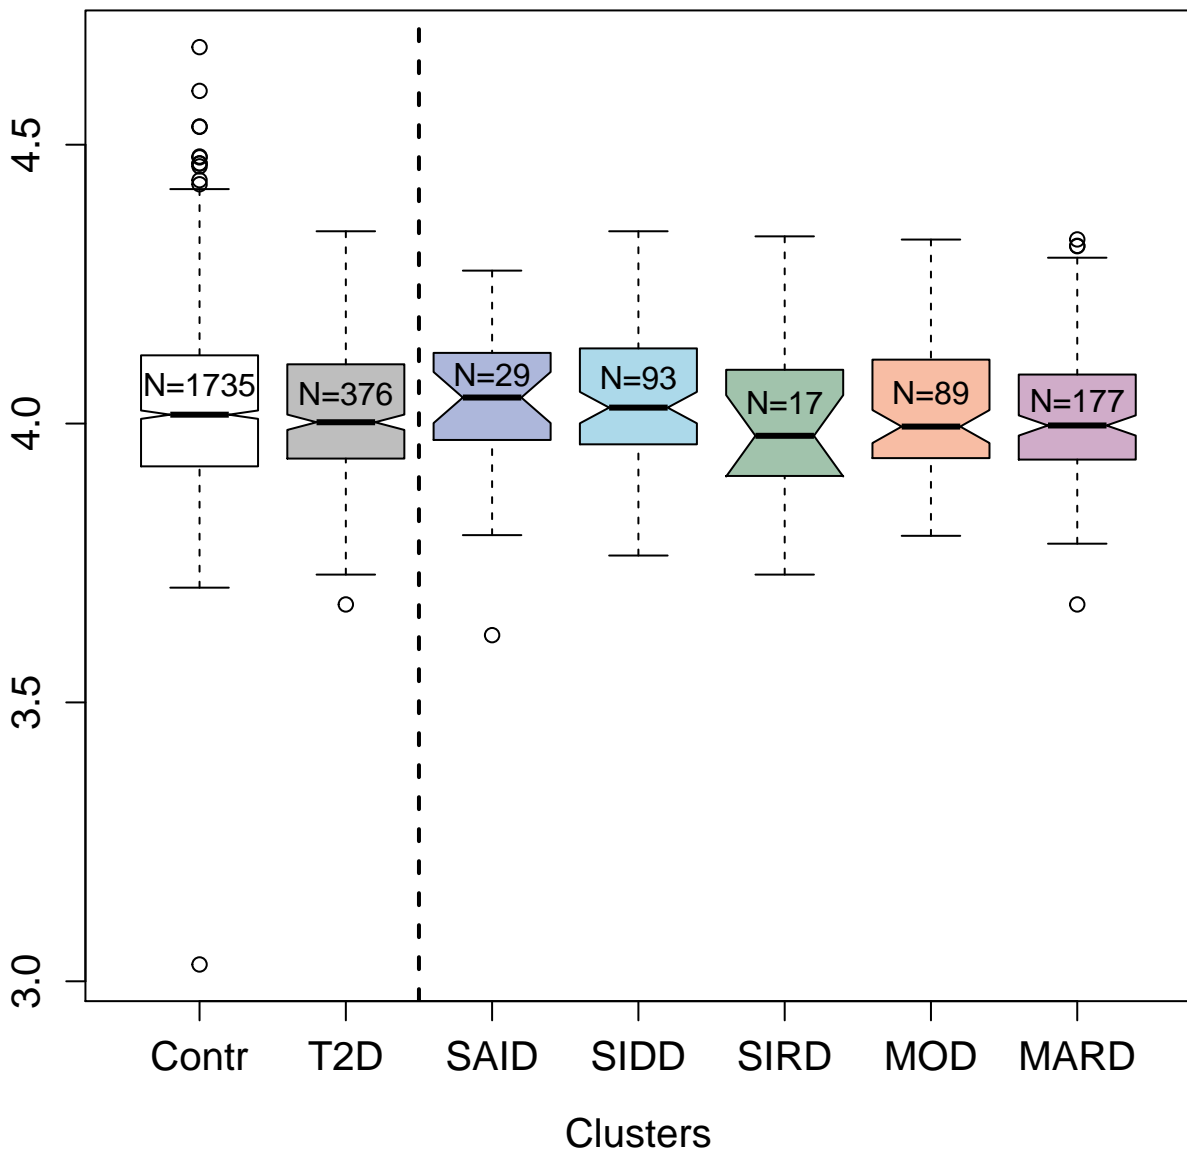

3173-49\_2 : N-acylethanolamine-hydrolyzing acid

amidase

5.0  
4.5  
4.0  
3.5

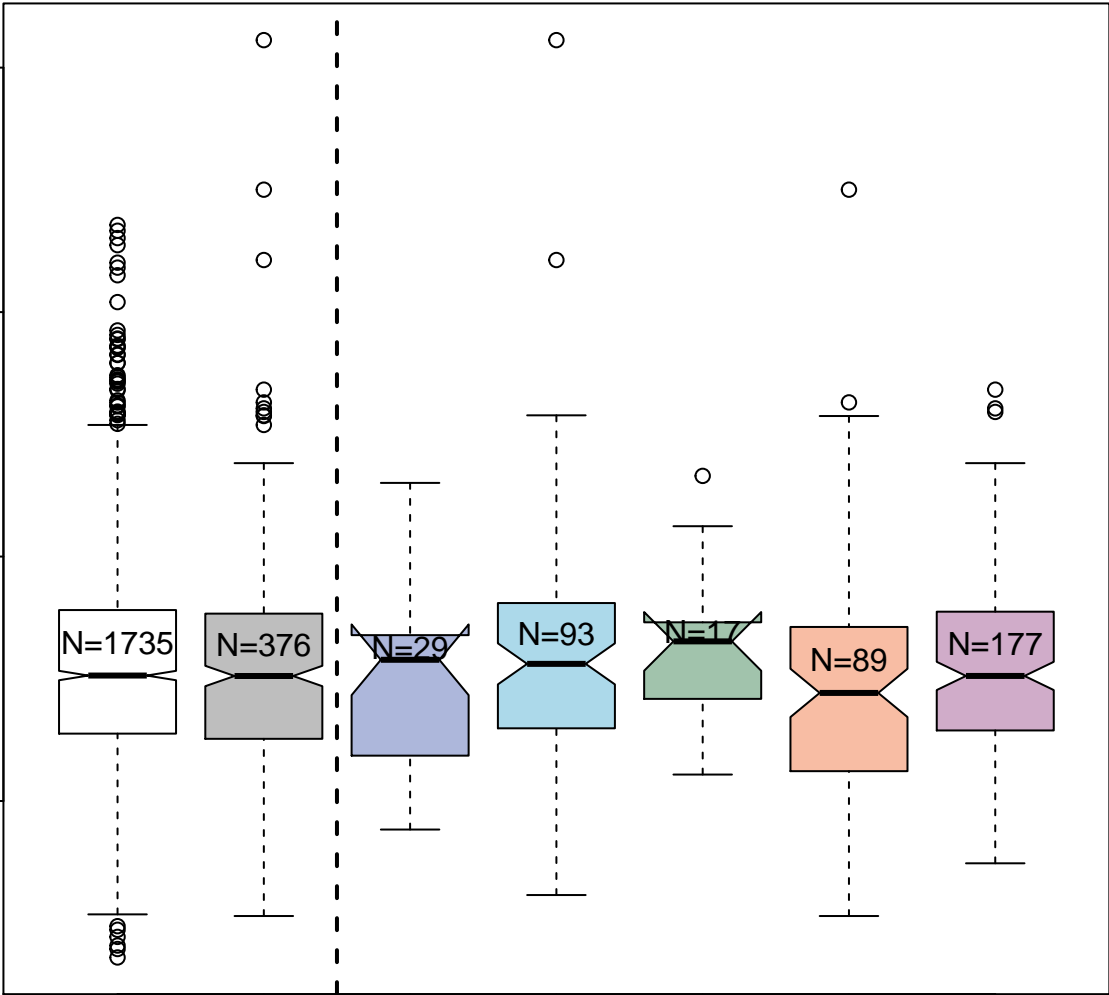

Clusters

Contr T2D SAID SIDD SIRD MOD MARD

2182-54\_1 : Complement C4b

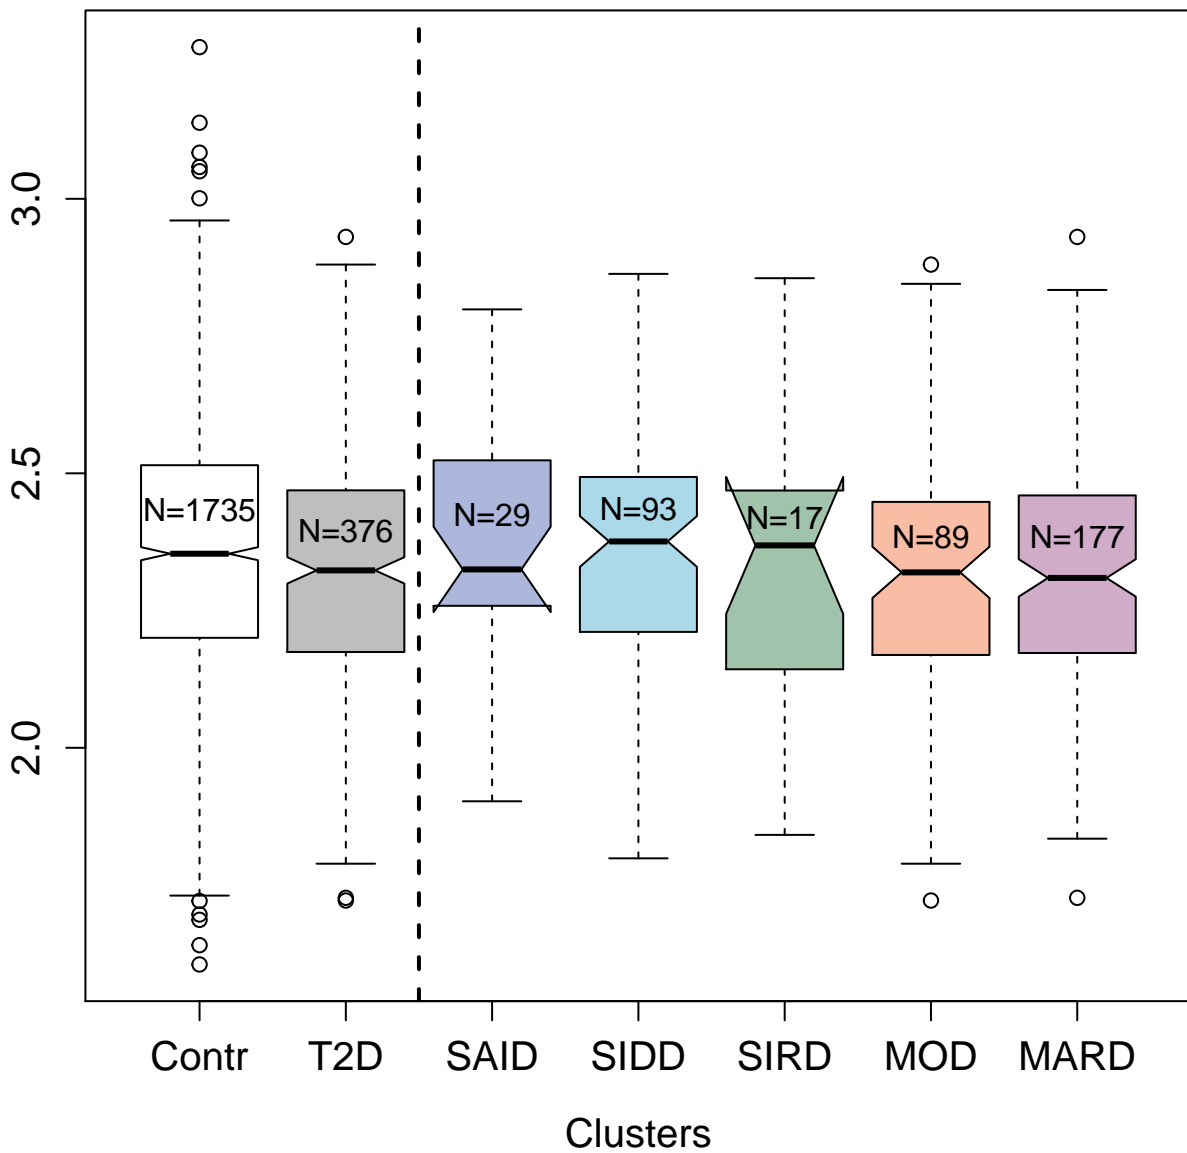

4322-28\_3 : Protein amnionless

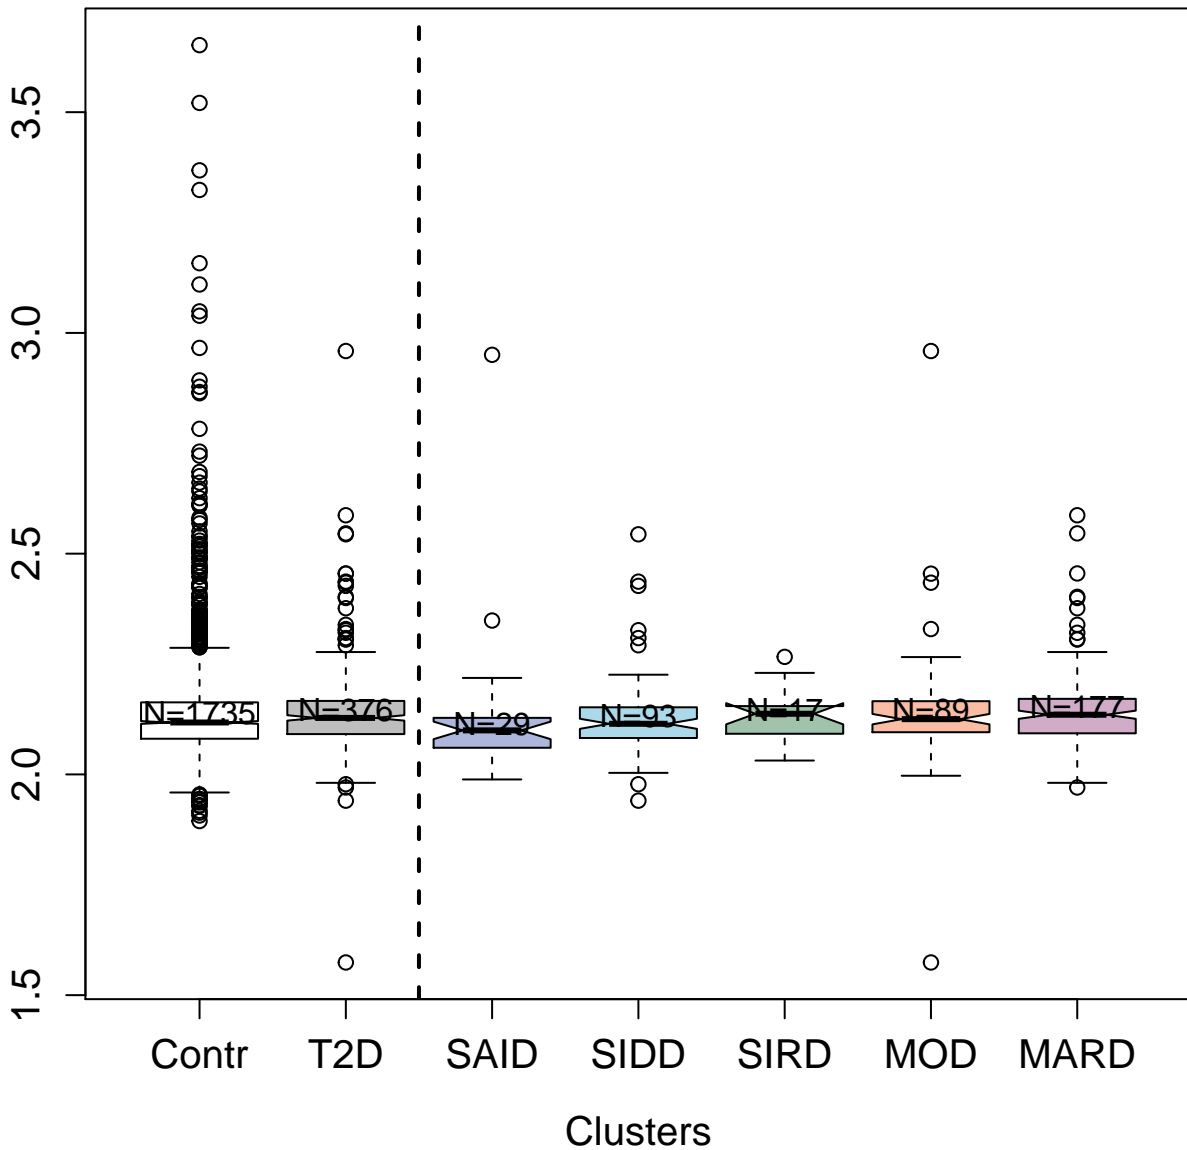

3067-67\_1 : Growth/differentiation factor 9

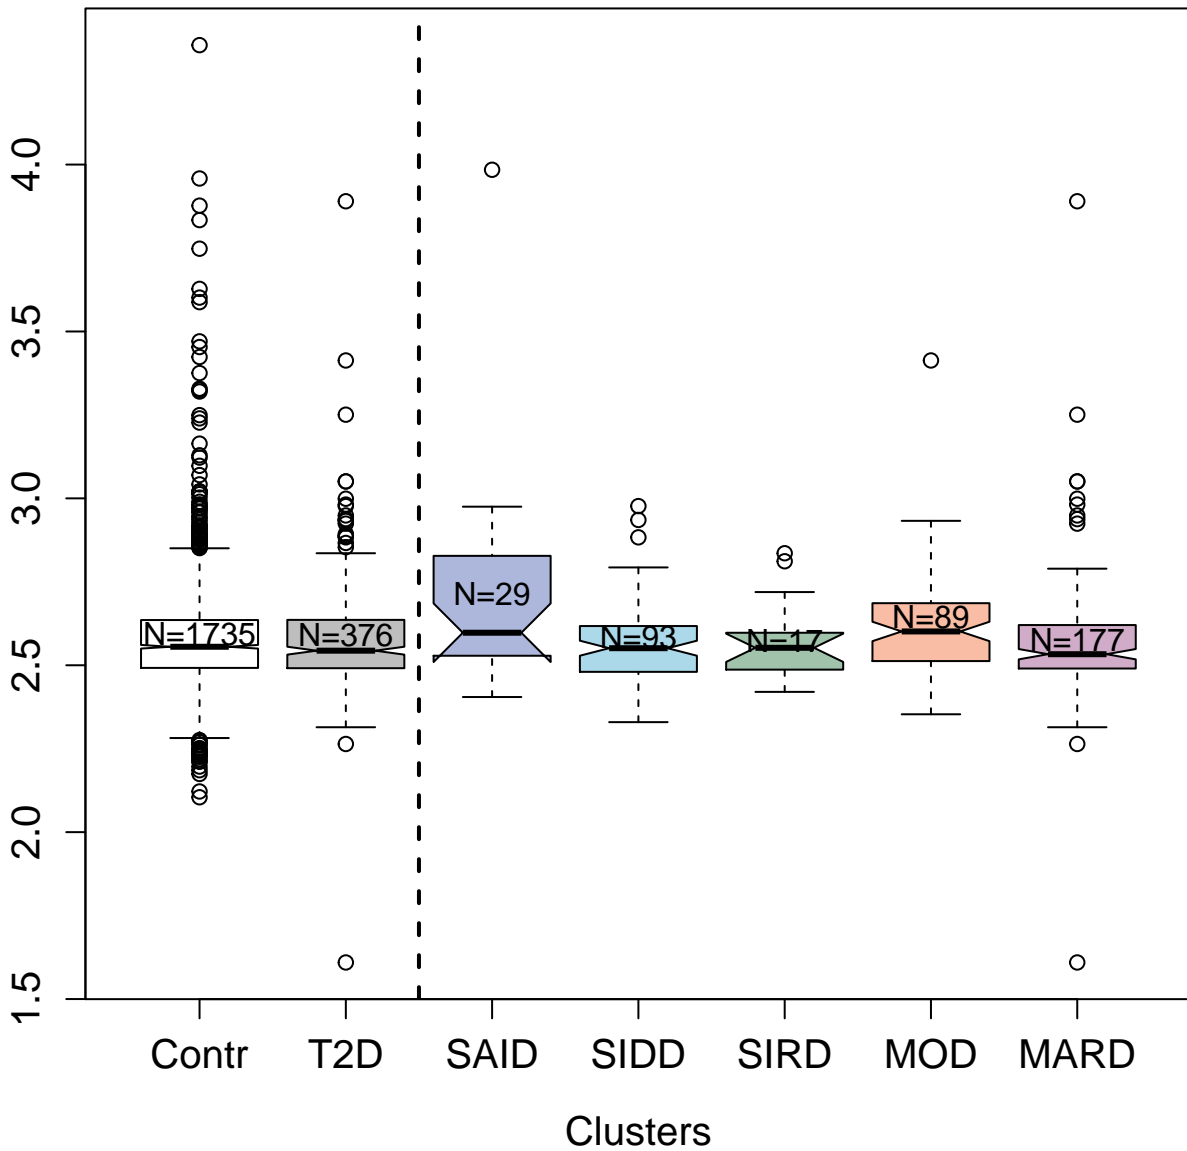



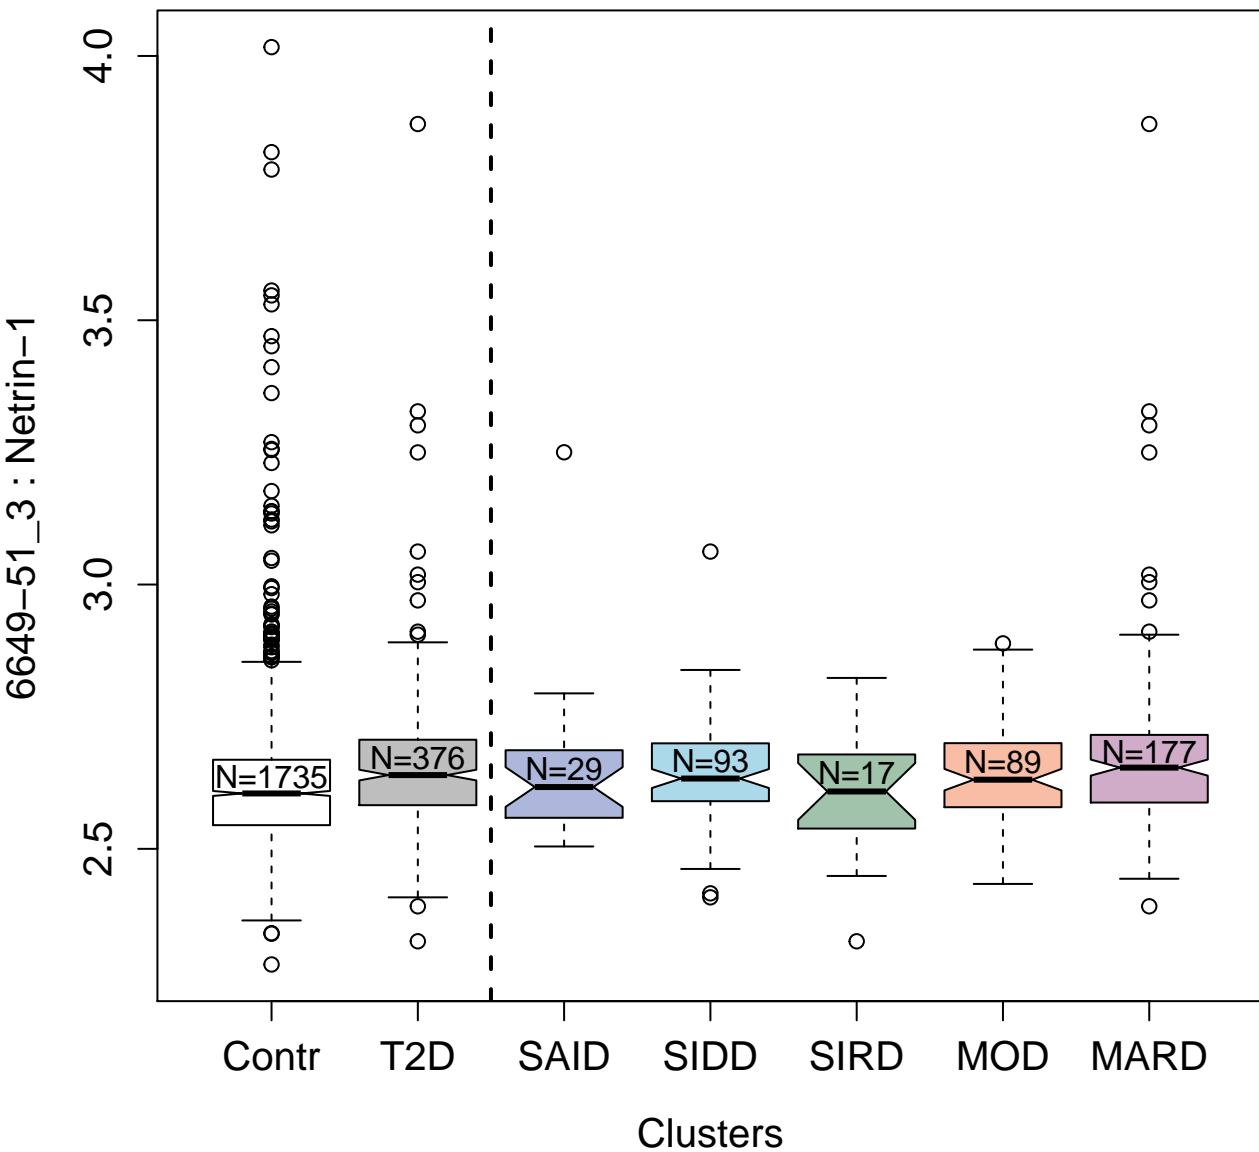

4913-78\_1 : C-C motif chemokine 16

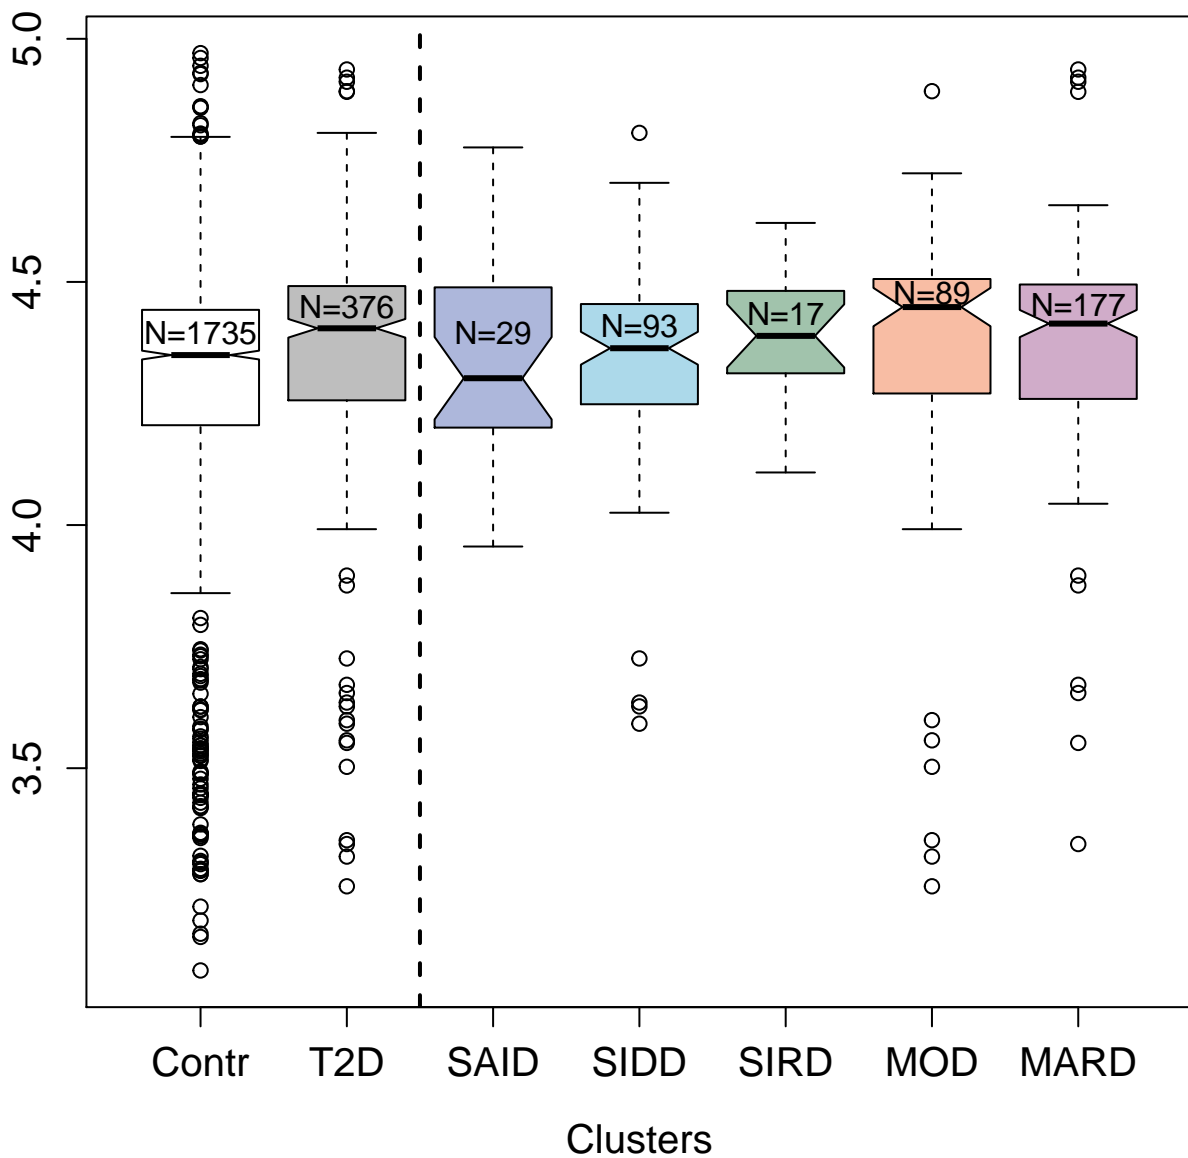

2794-60\_2 : Superoxide dismutase [Cu-Zn]

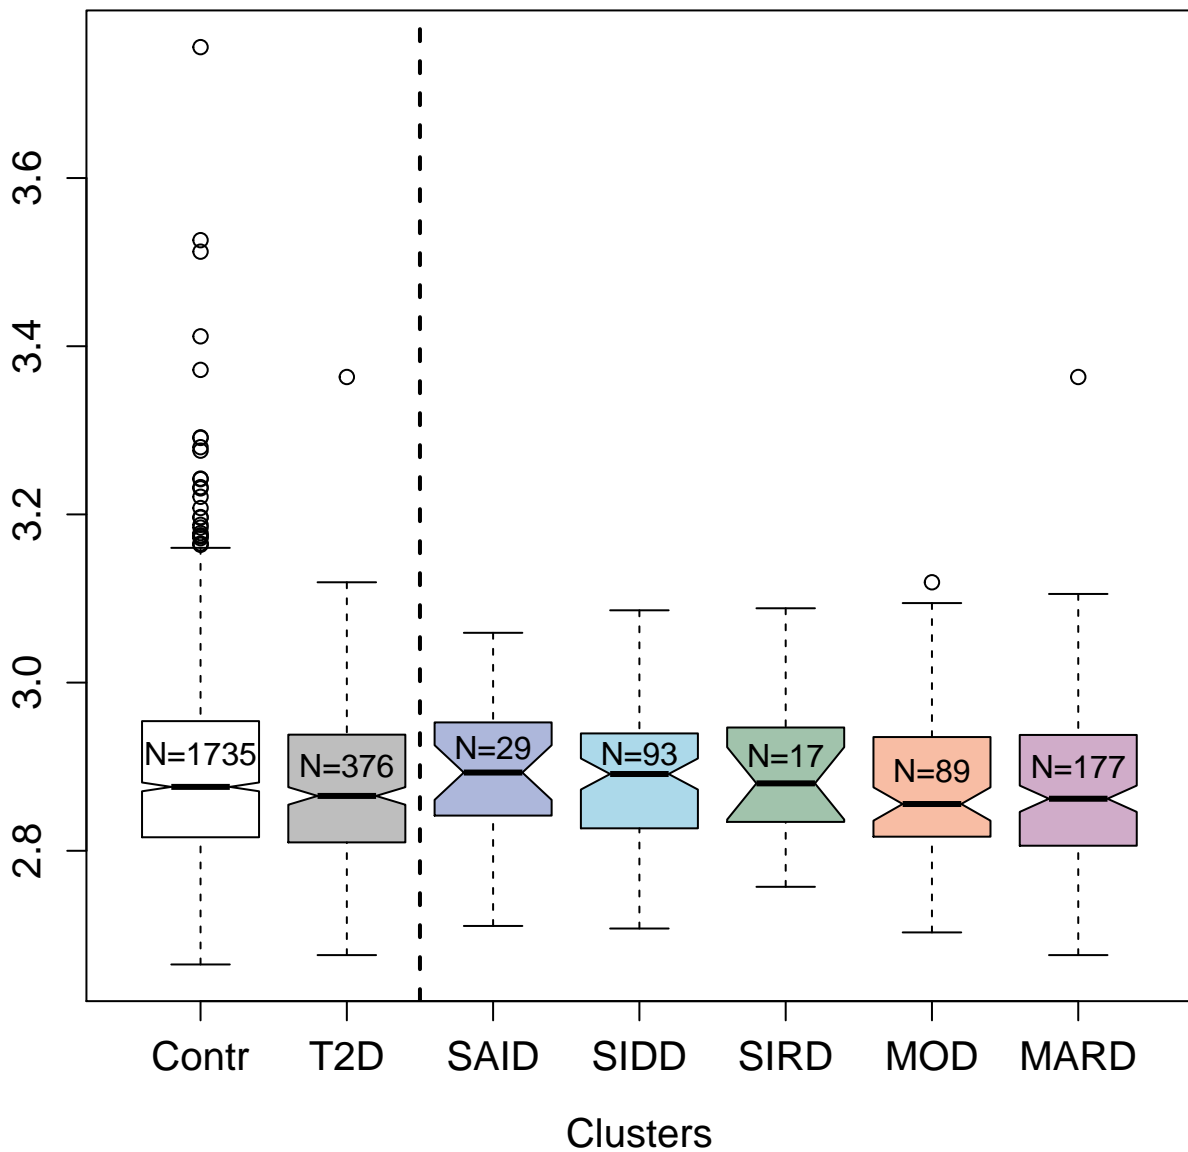

2870-29\_2 : Ras-related C3 botulinum toxin

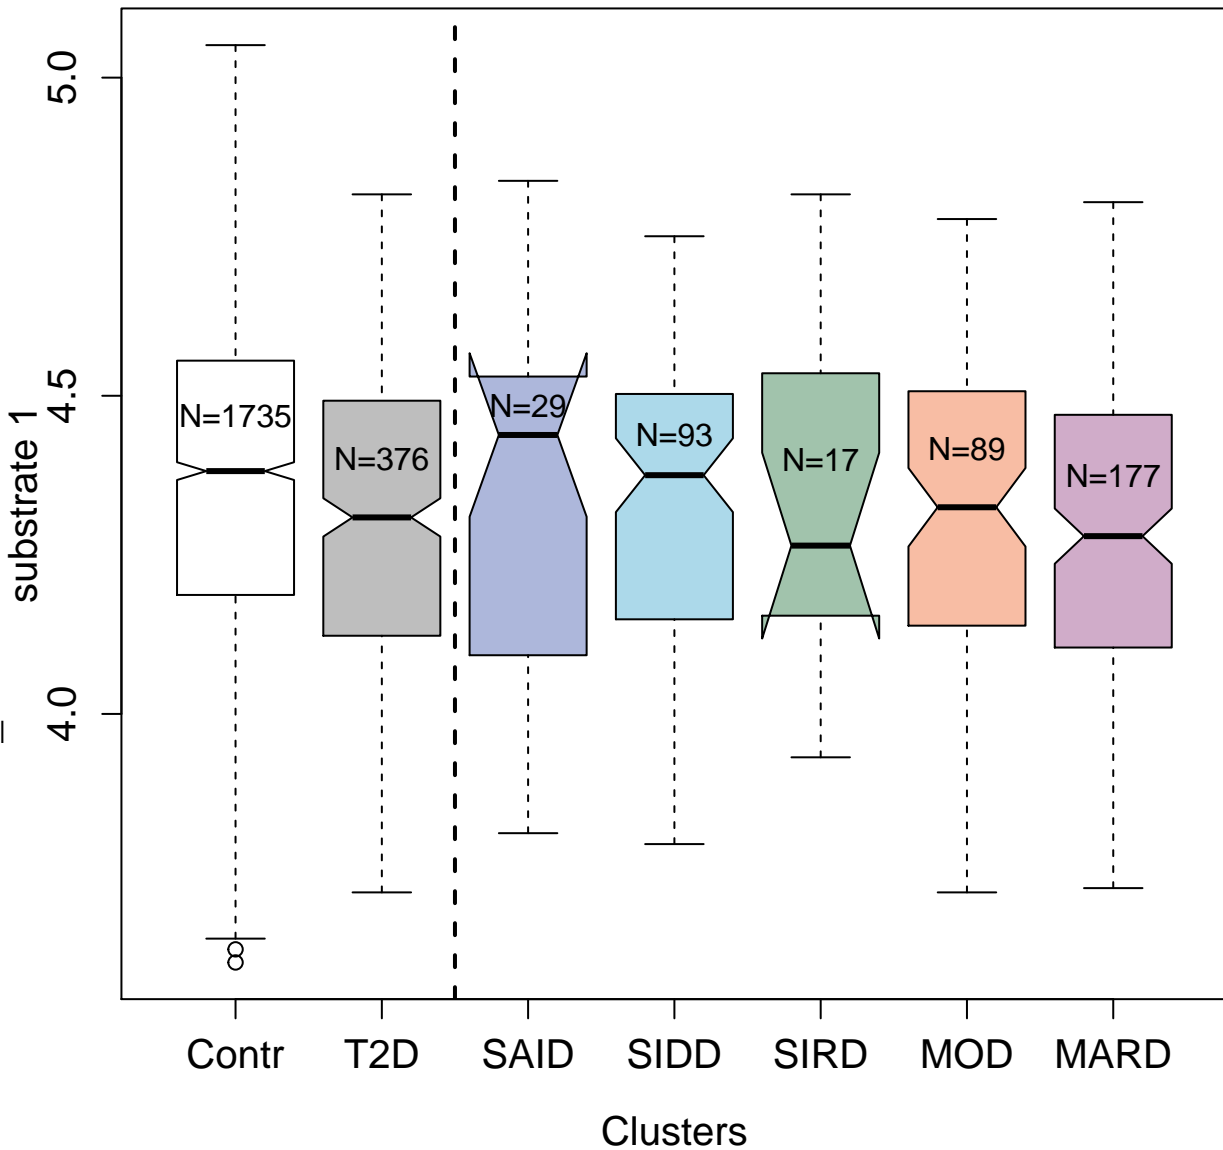

5484-63\_3 : 40S ribosomal protein S3a

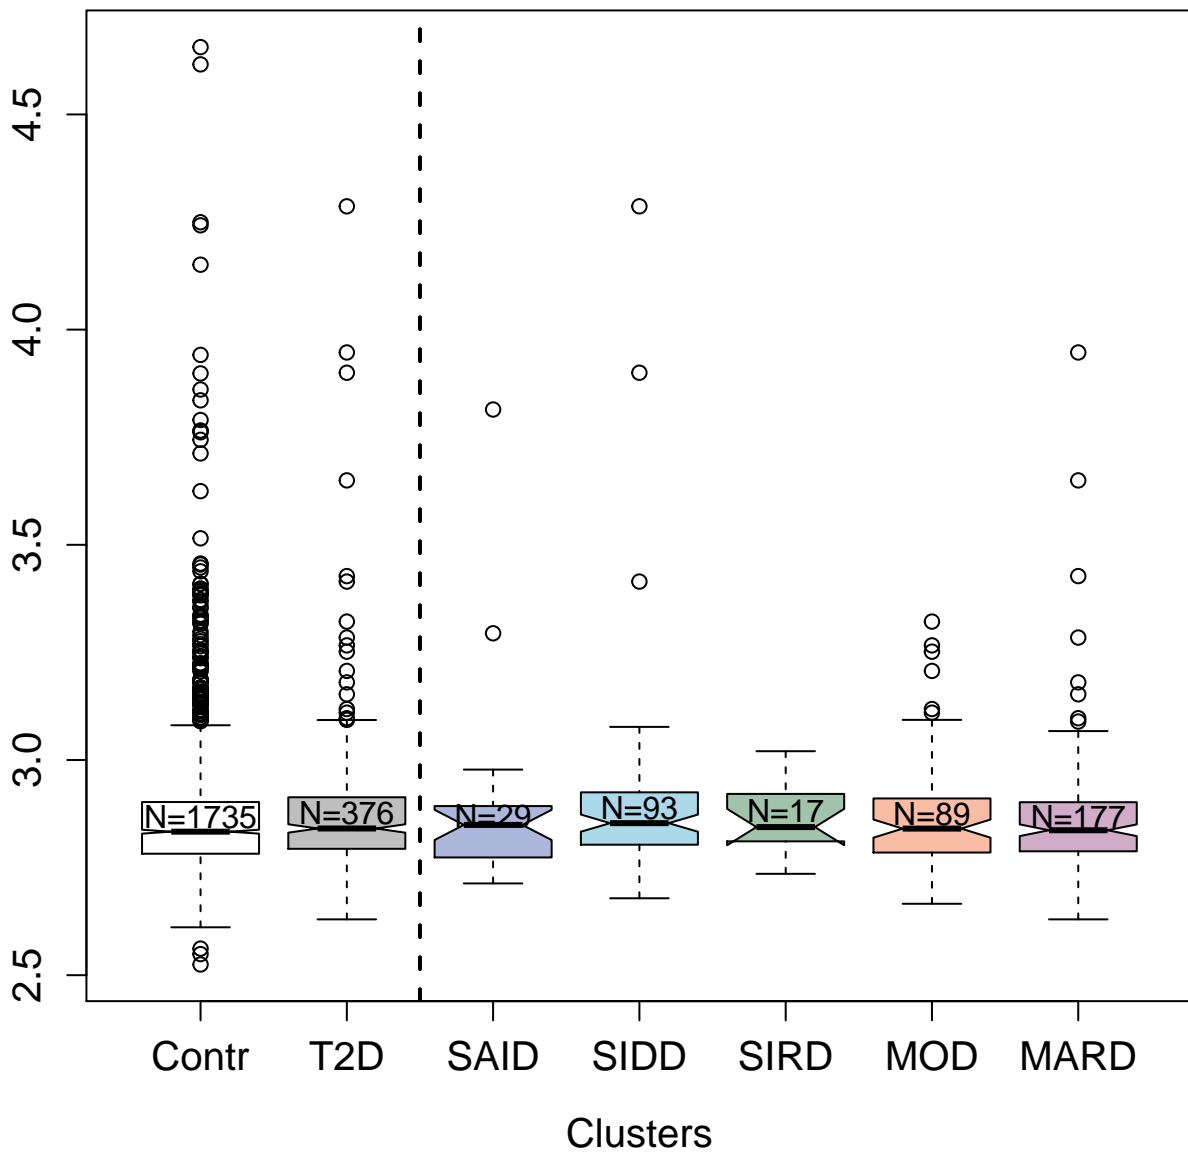

5364-7\_3 : Protein SET

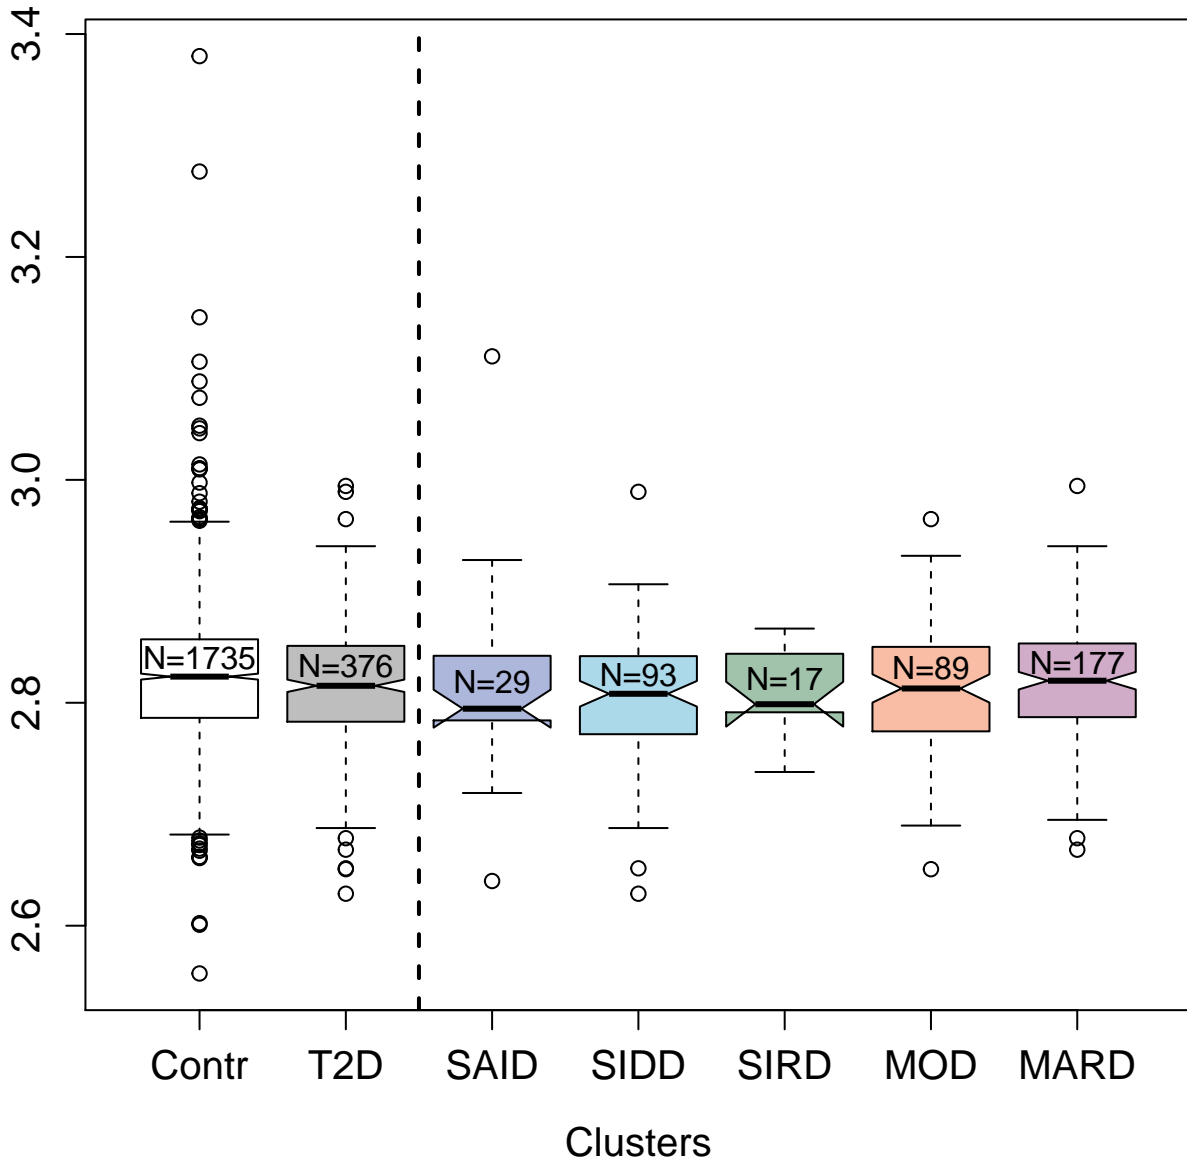

2743-5\_2 : Sonic hedgehog protein

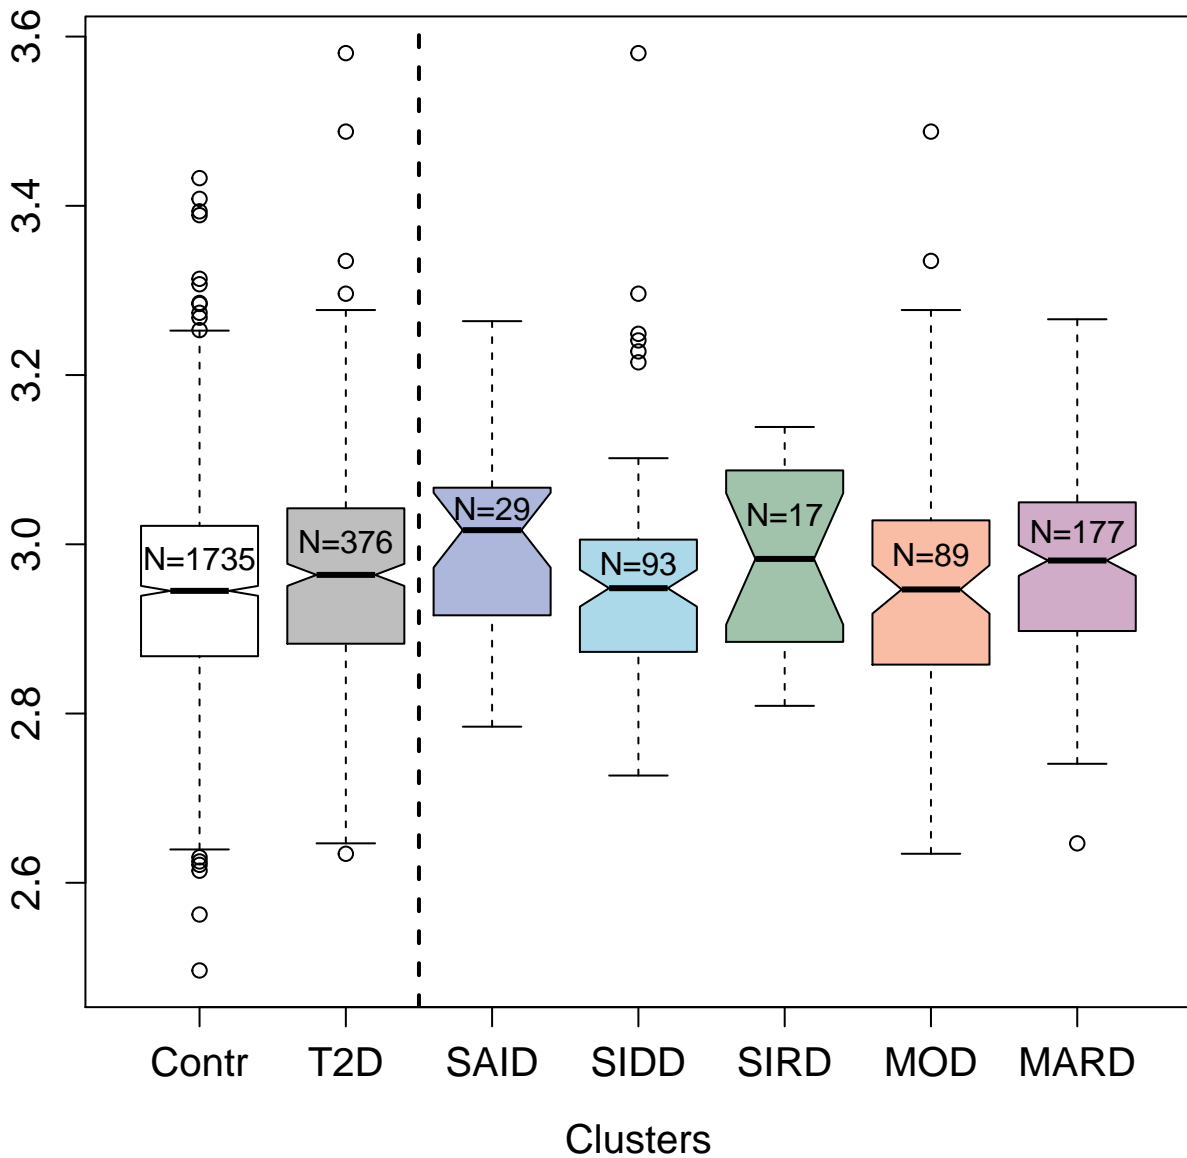

13132-14\_3 : Semaphorin-5A

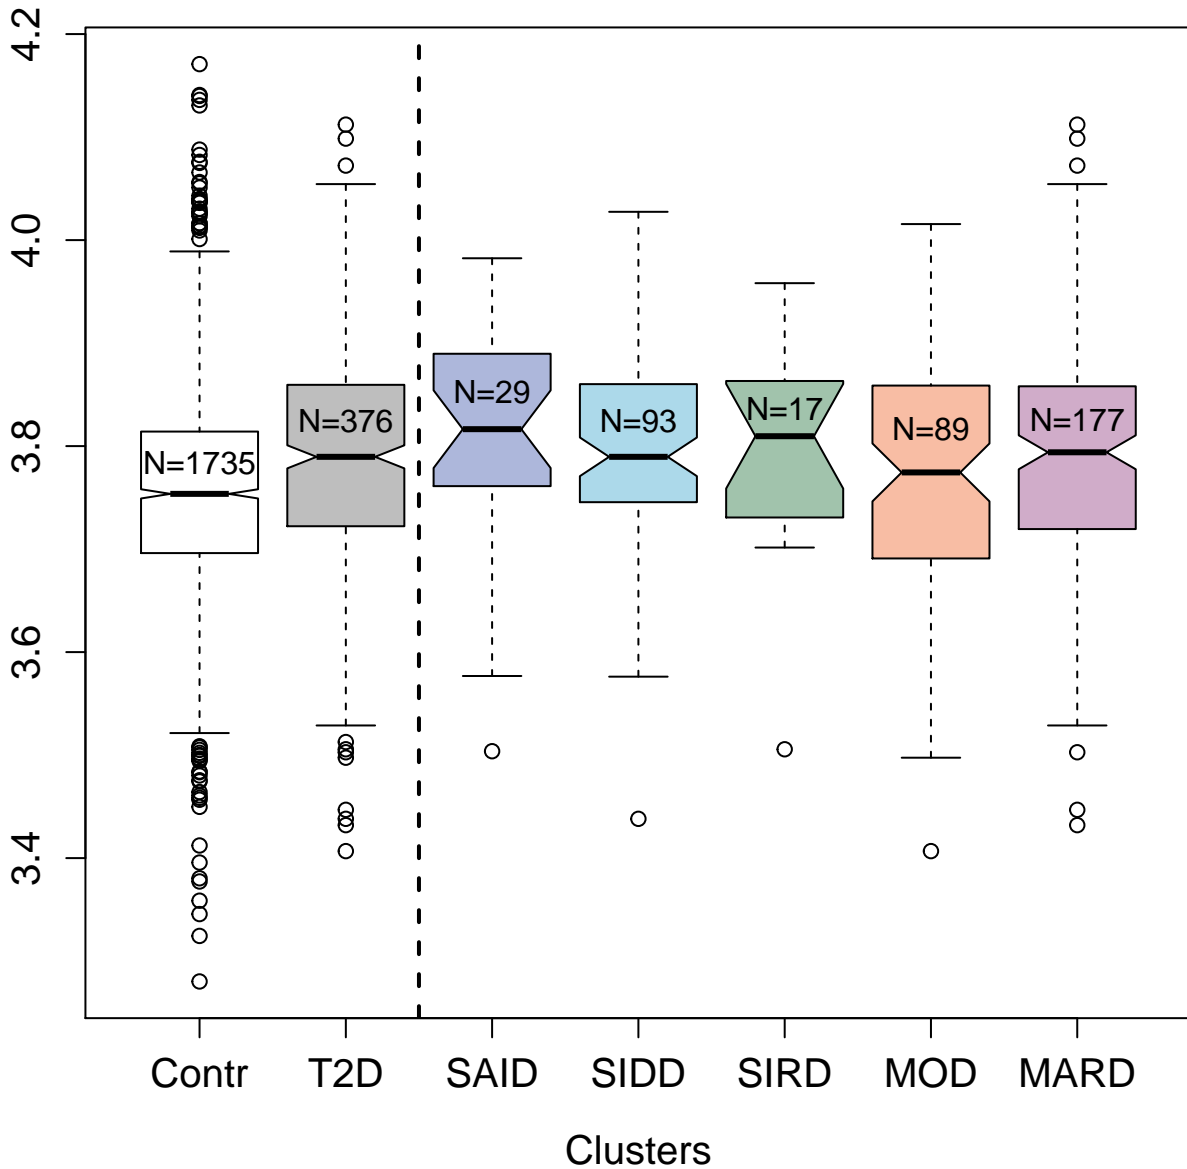



4134-4\_2 : Heparin-binding EGF-like growth factor

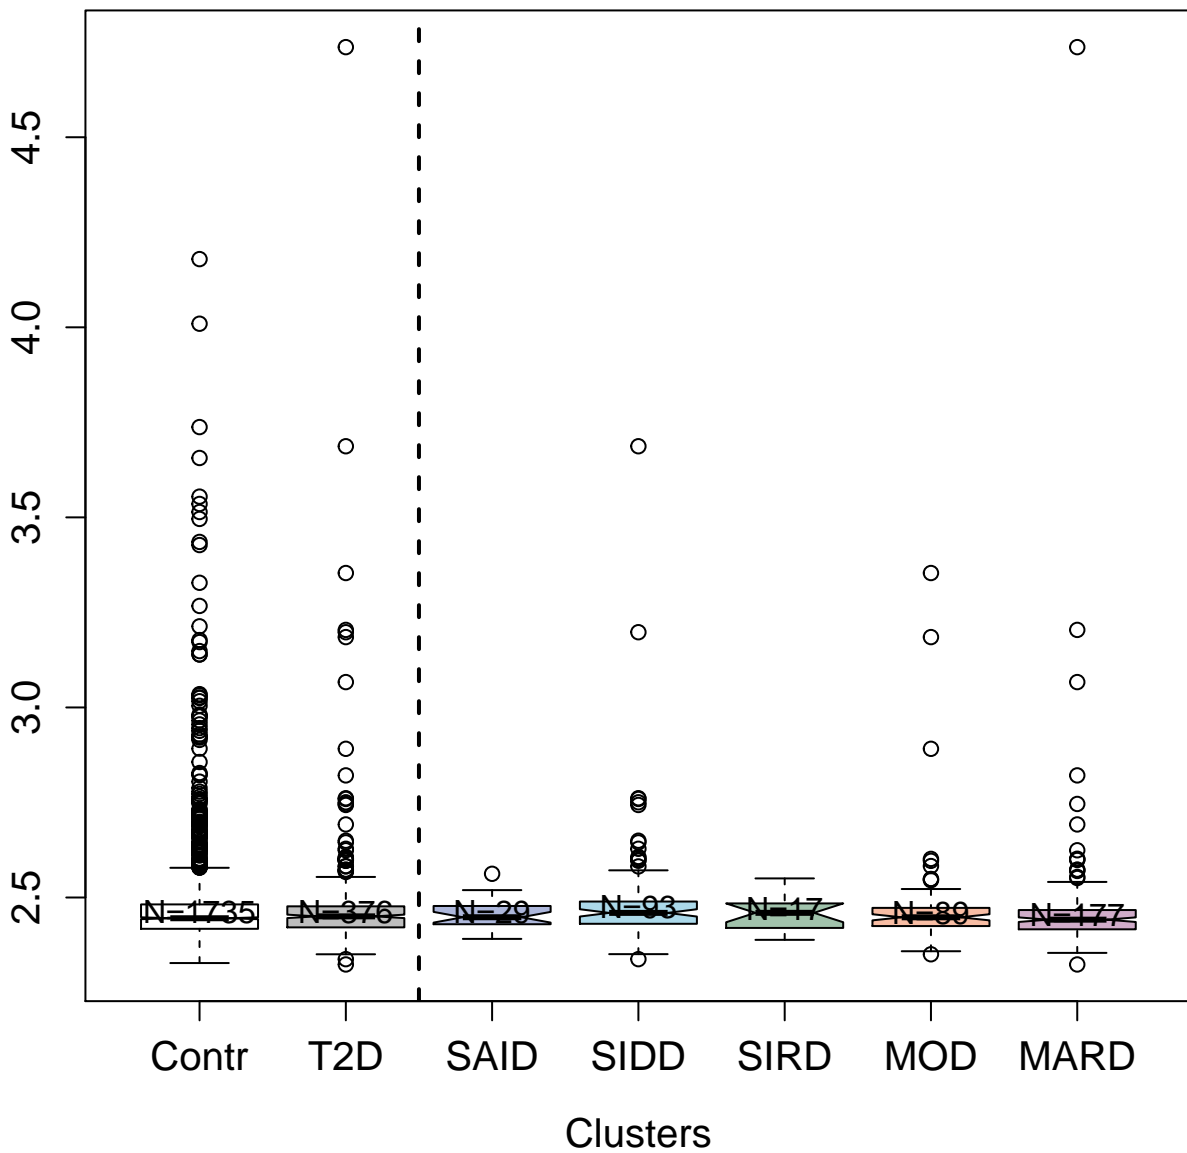

2753-2\_2 : Complement C1q subcomponent

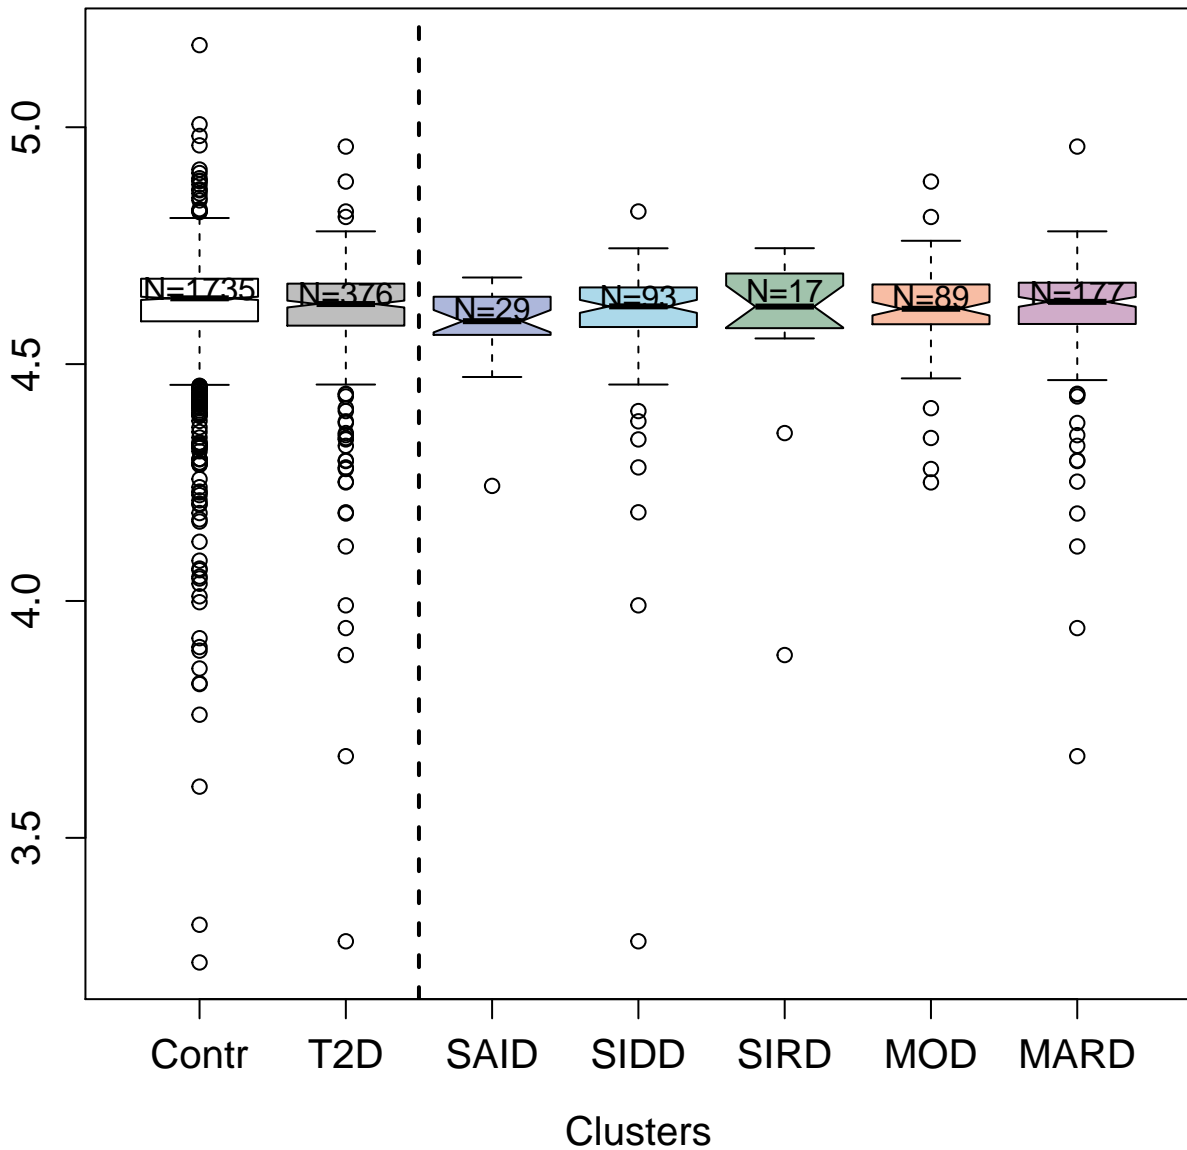

5036-50\_1 : Tumor necrosis factor-inducible gene

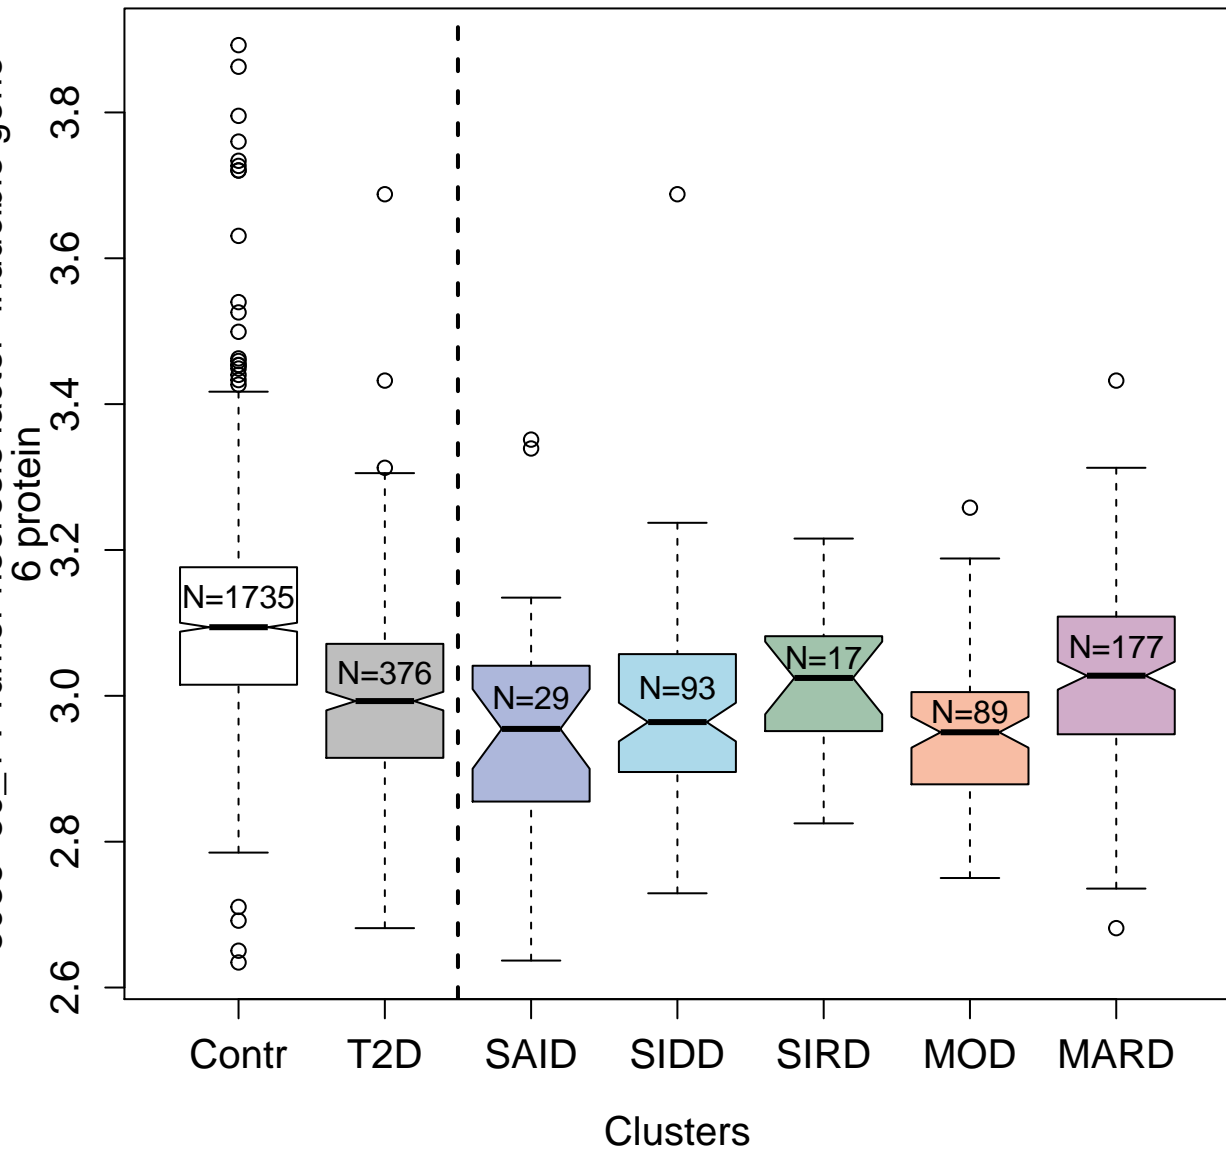

2938-55\_2 : Apolipoprotein E (isoform E4)

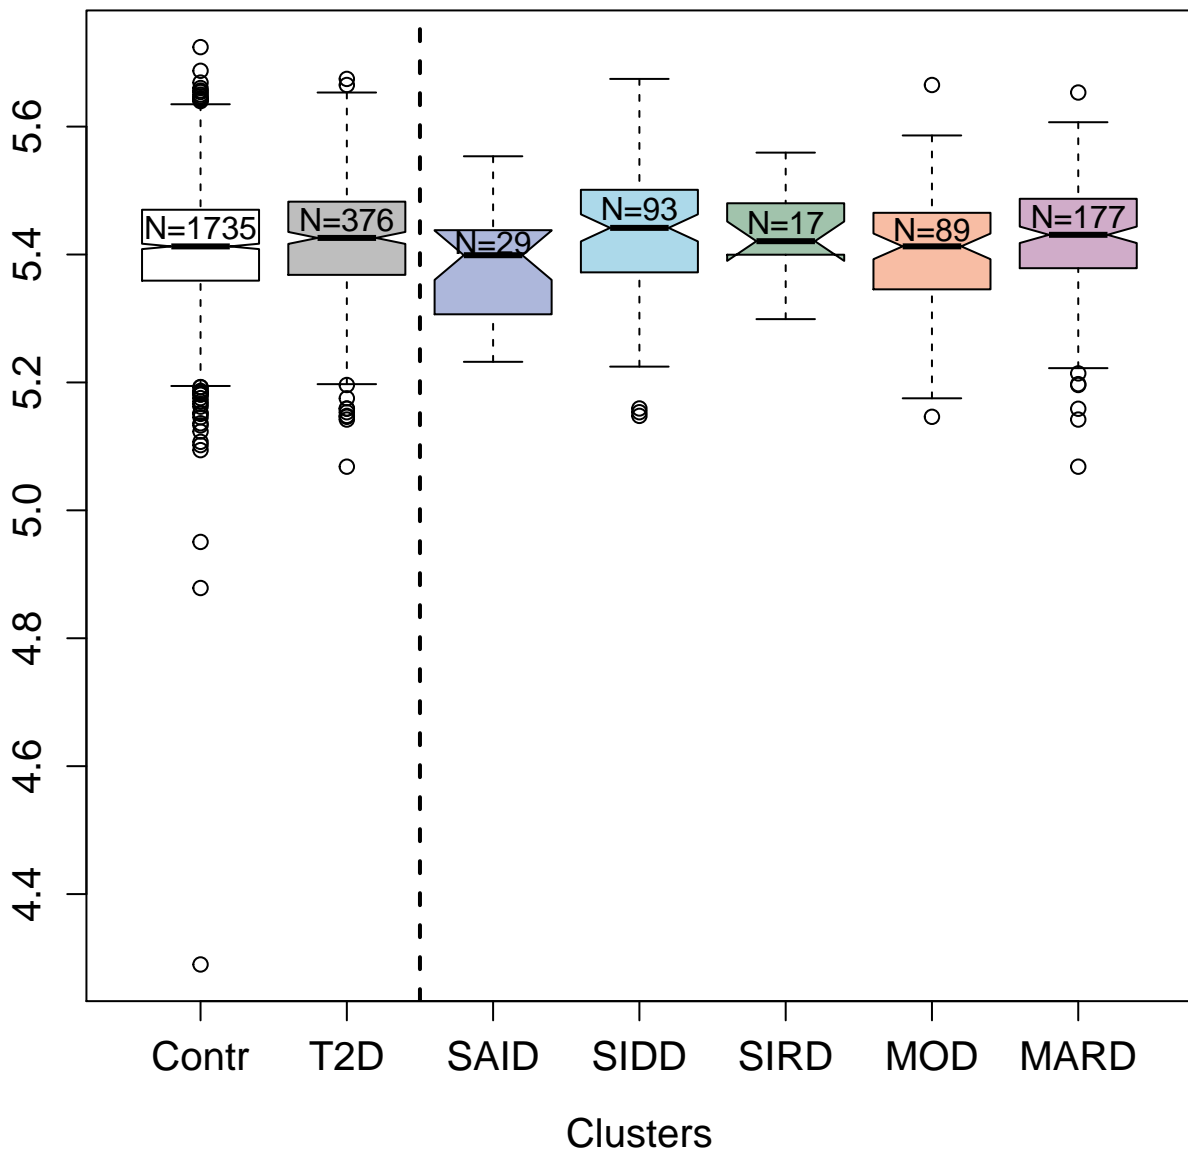

4407-10\_1 : Hepatocyte growth factor-like protein

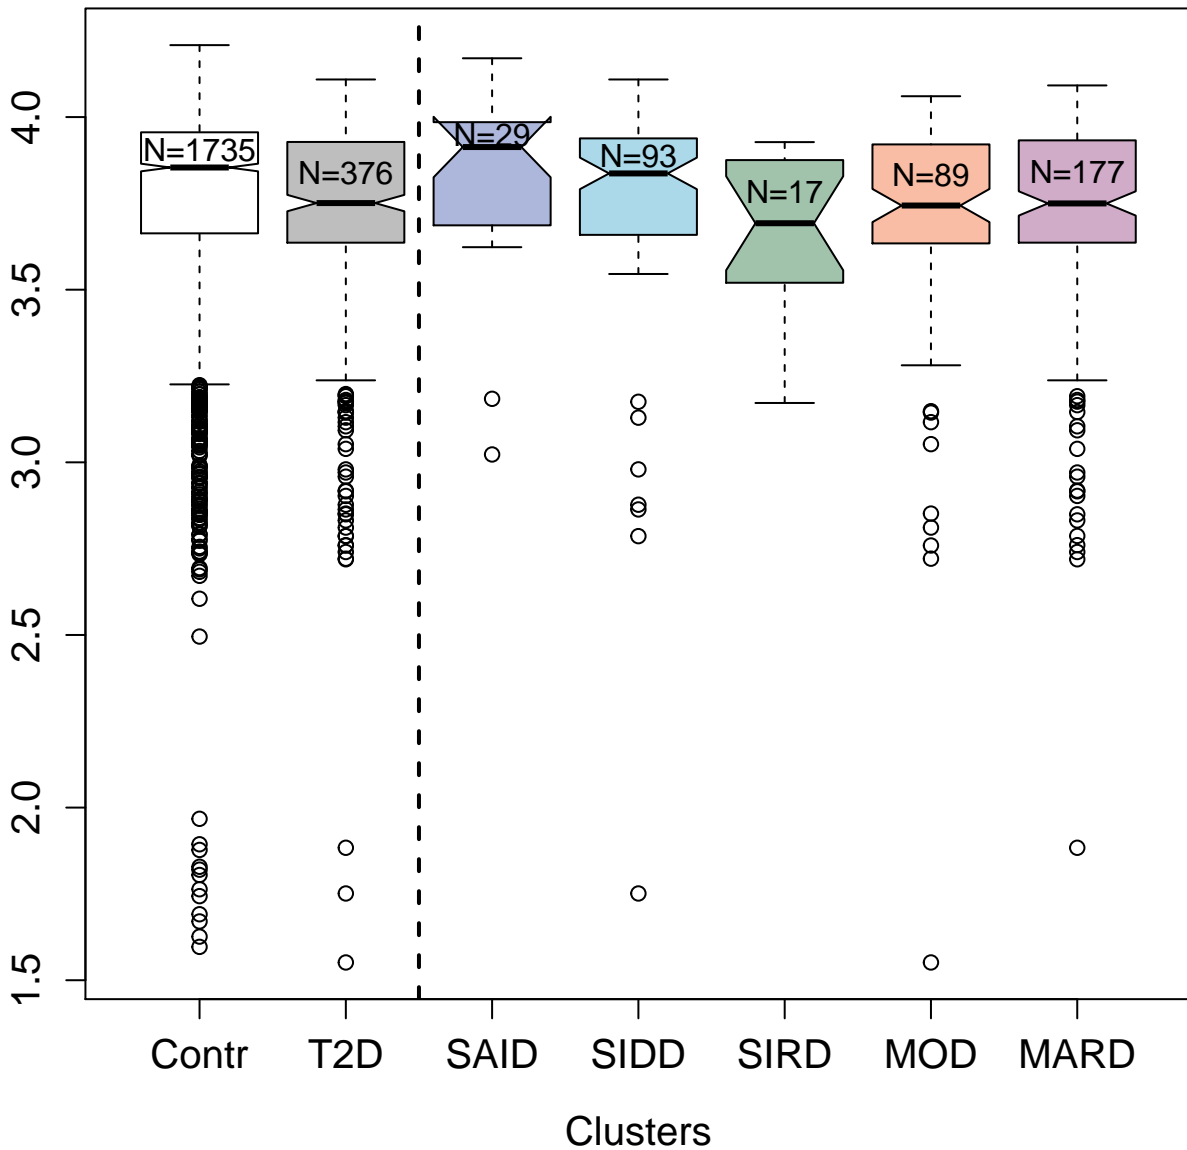

3825-18\_2 : Mitogen-activated protein kinase 8

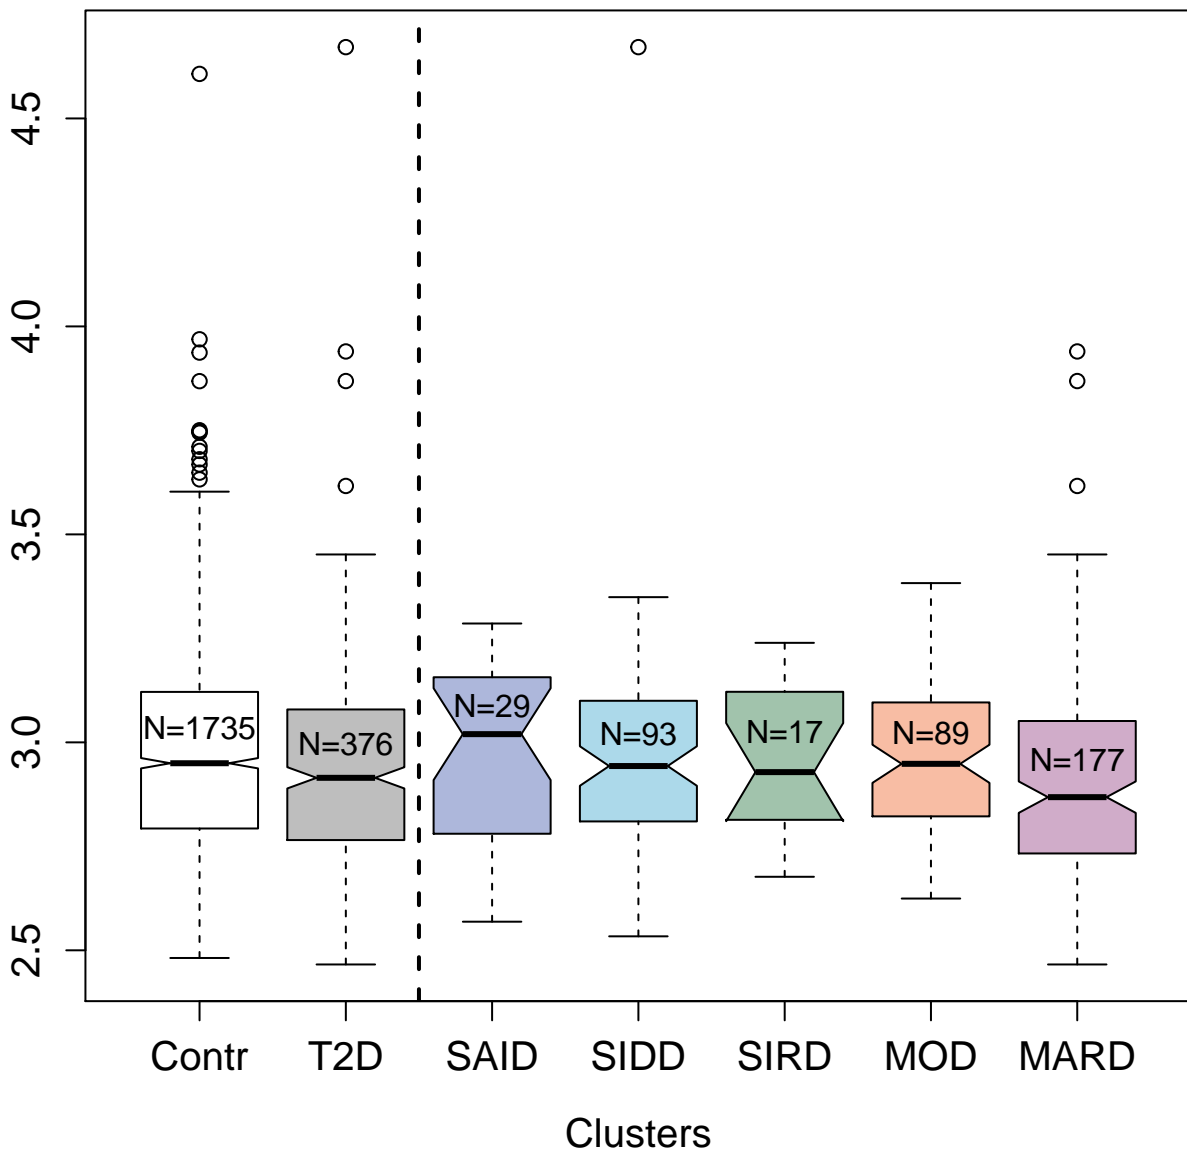

3168-8\_2 : A disintegrin and metalloproteinase  
with thrombospondin motifs 5

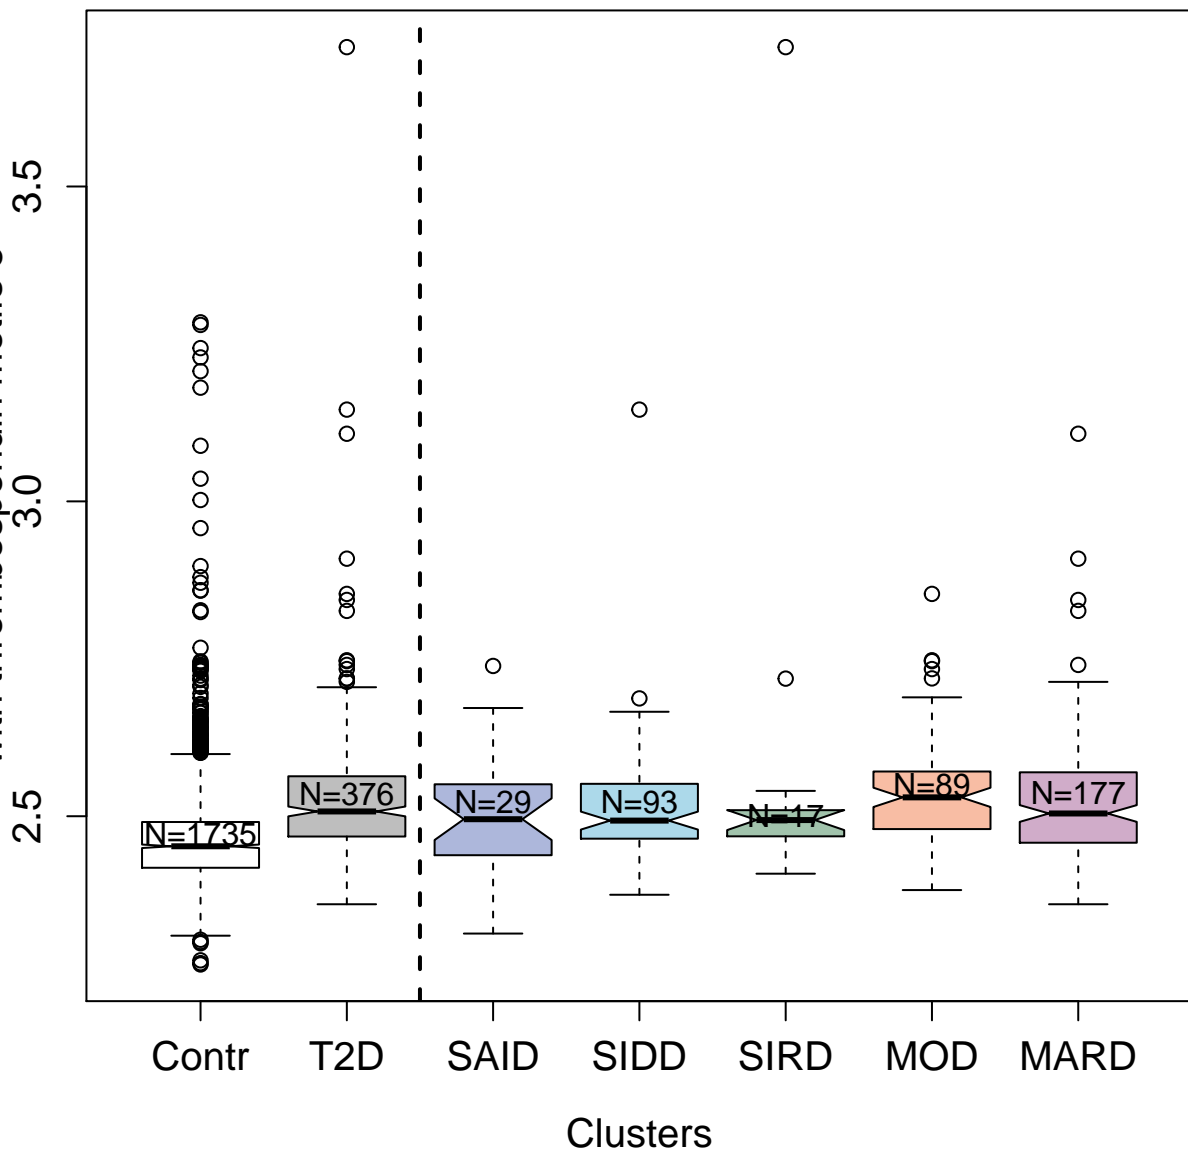

2711-6\_2 : Ciliary neurotrophic factor receptor subunit alpha

3.2  
3.4  
3.6  
3.8  
4.0  
4.2

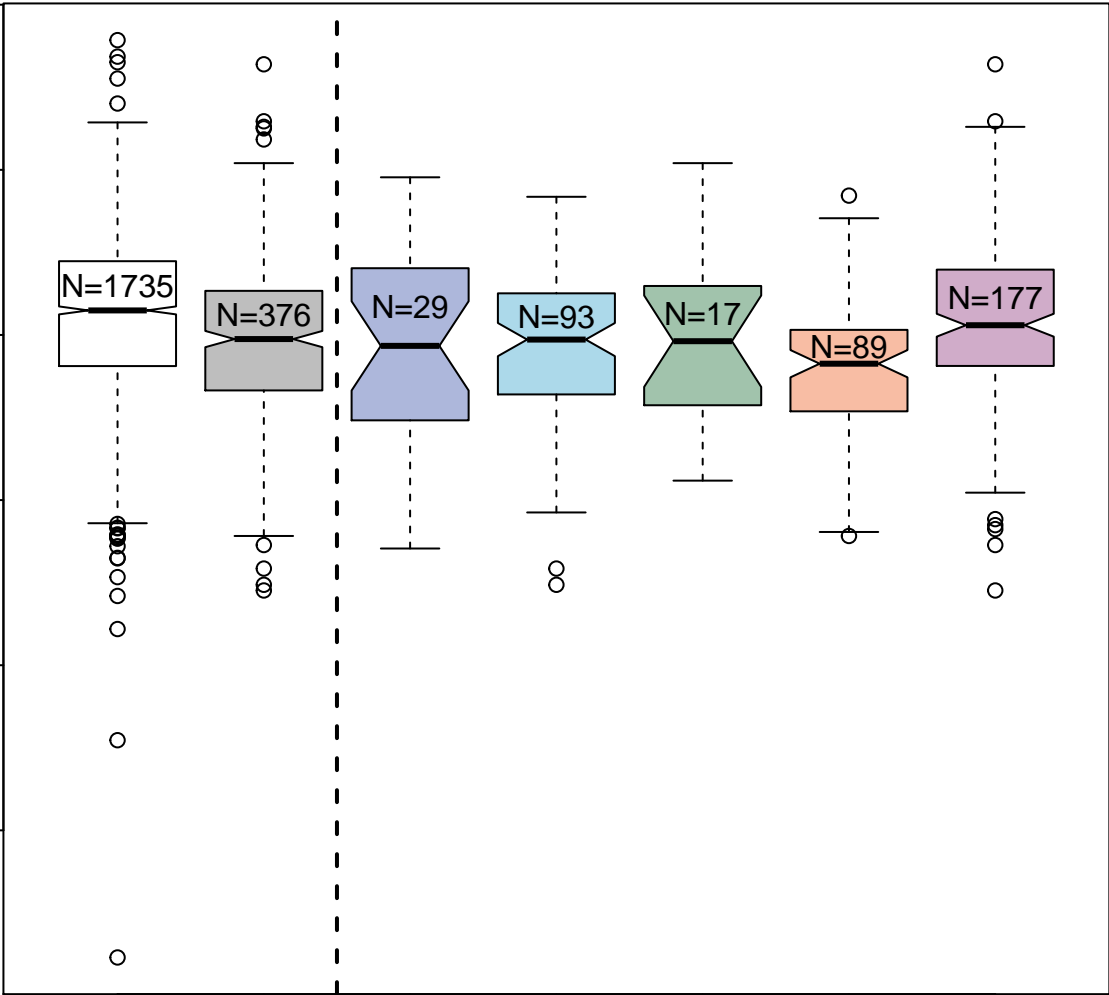

Clusters



3302-58\_1 : Cystatin-F

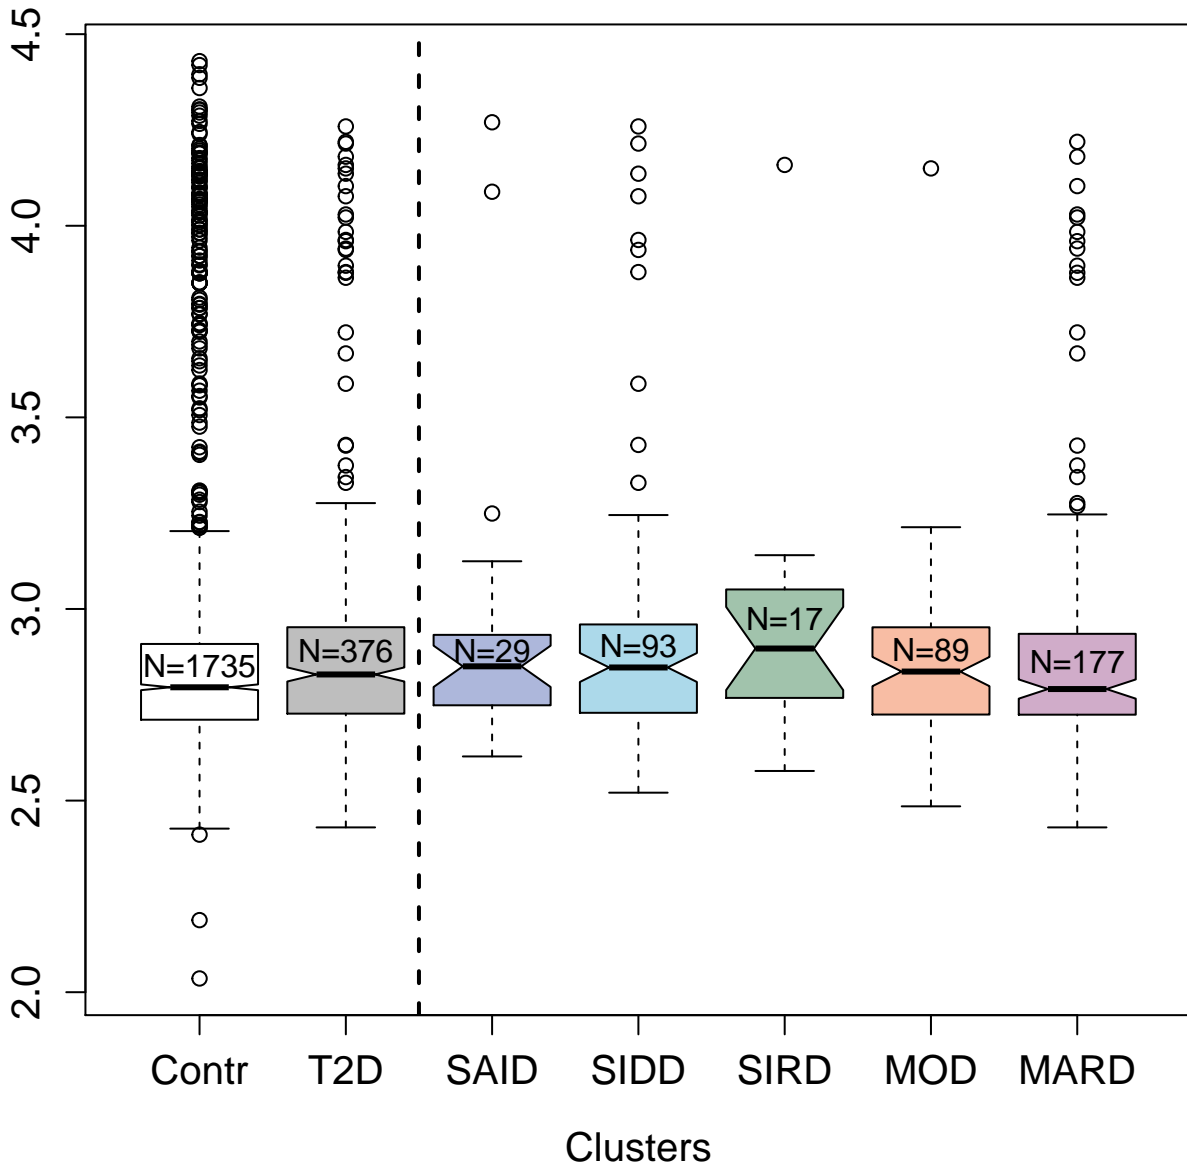

10372-18\_3 : Signal transducer and activator of transcription 6

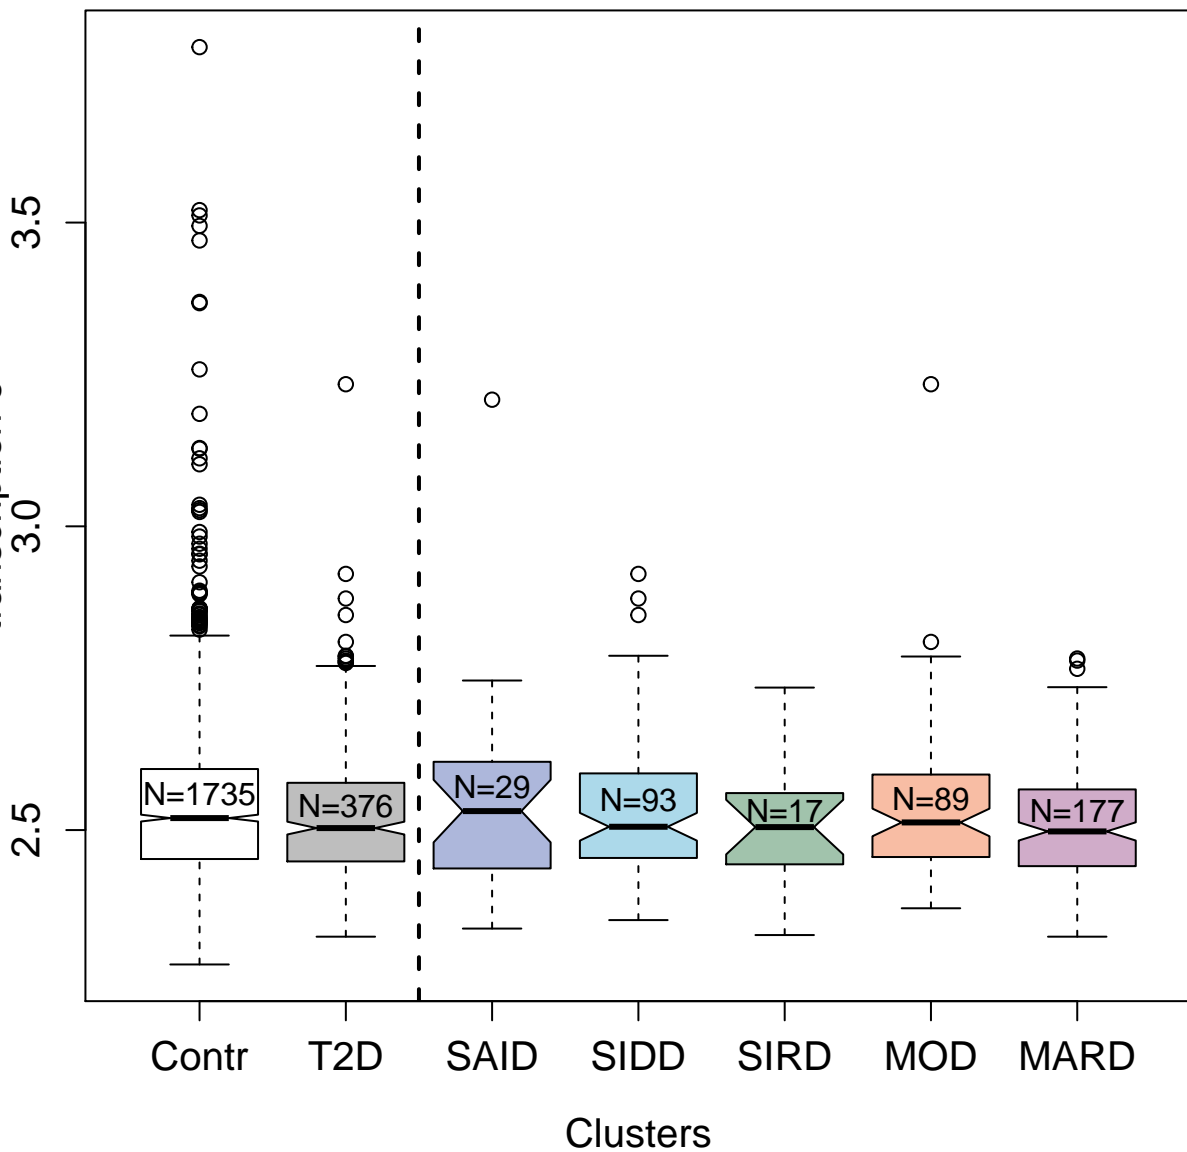

2700-56\_2 : Vitamin K-dependent protein S

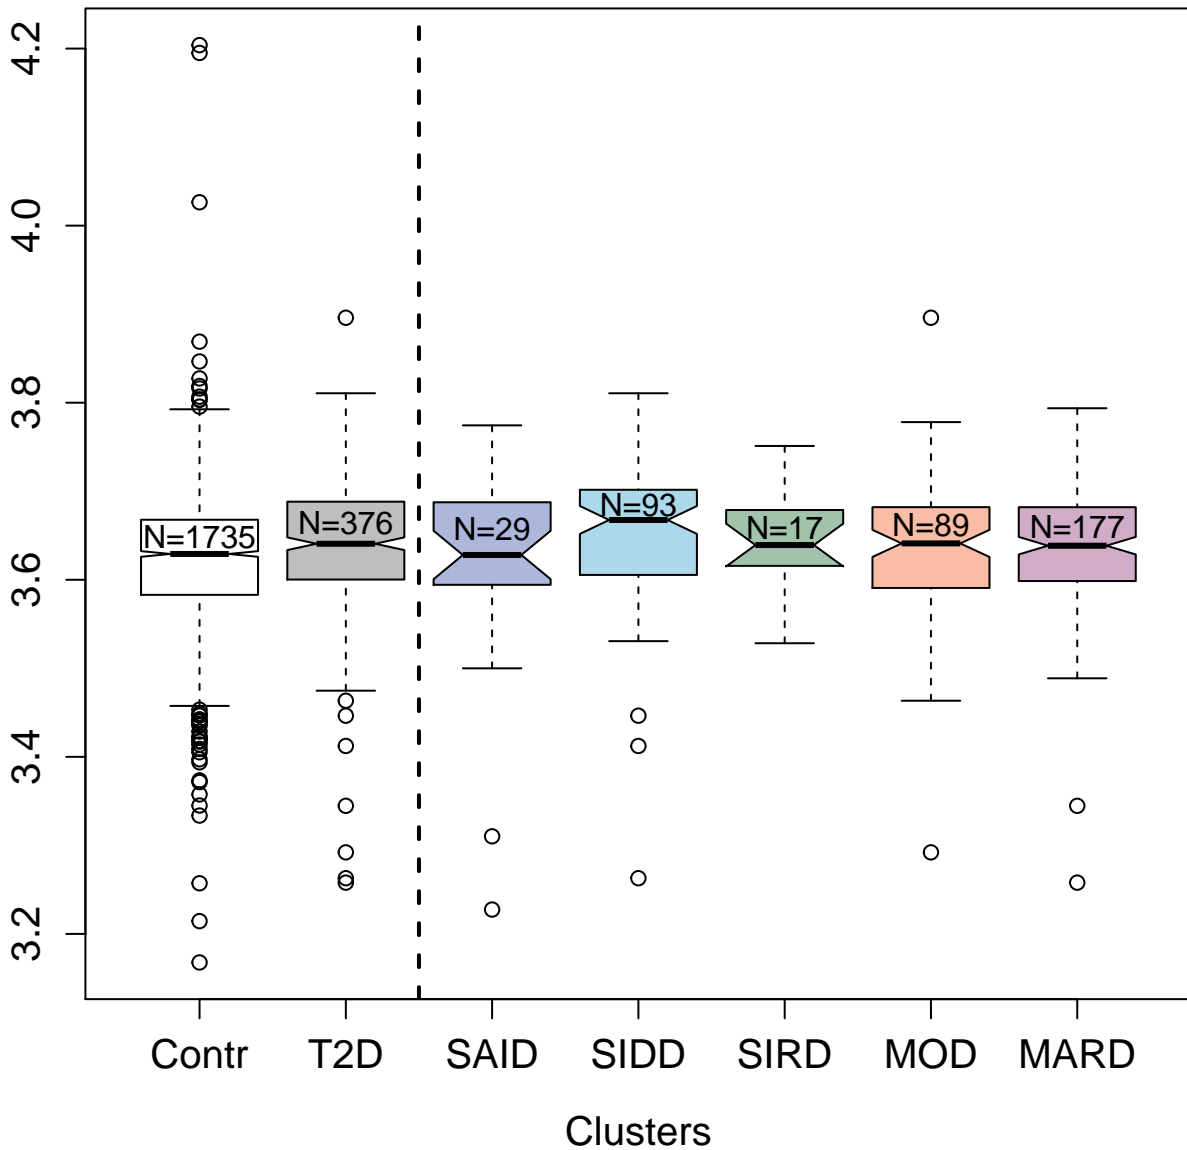

2768-56\_2 : Hemopexin

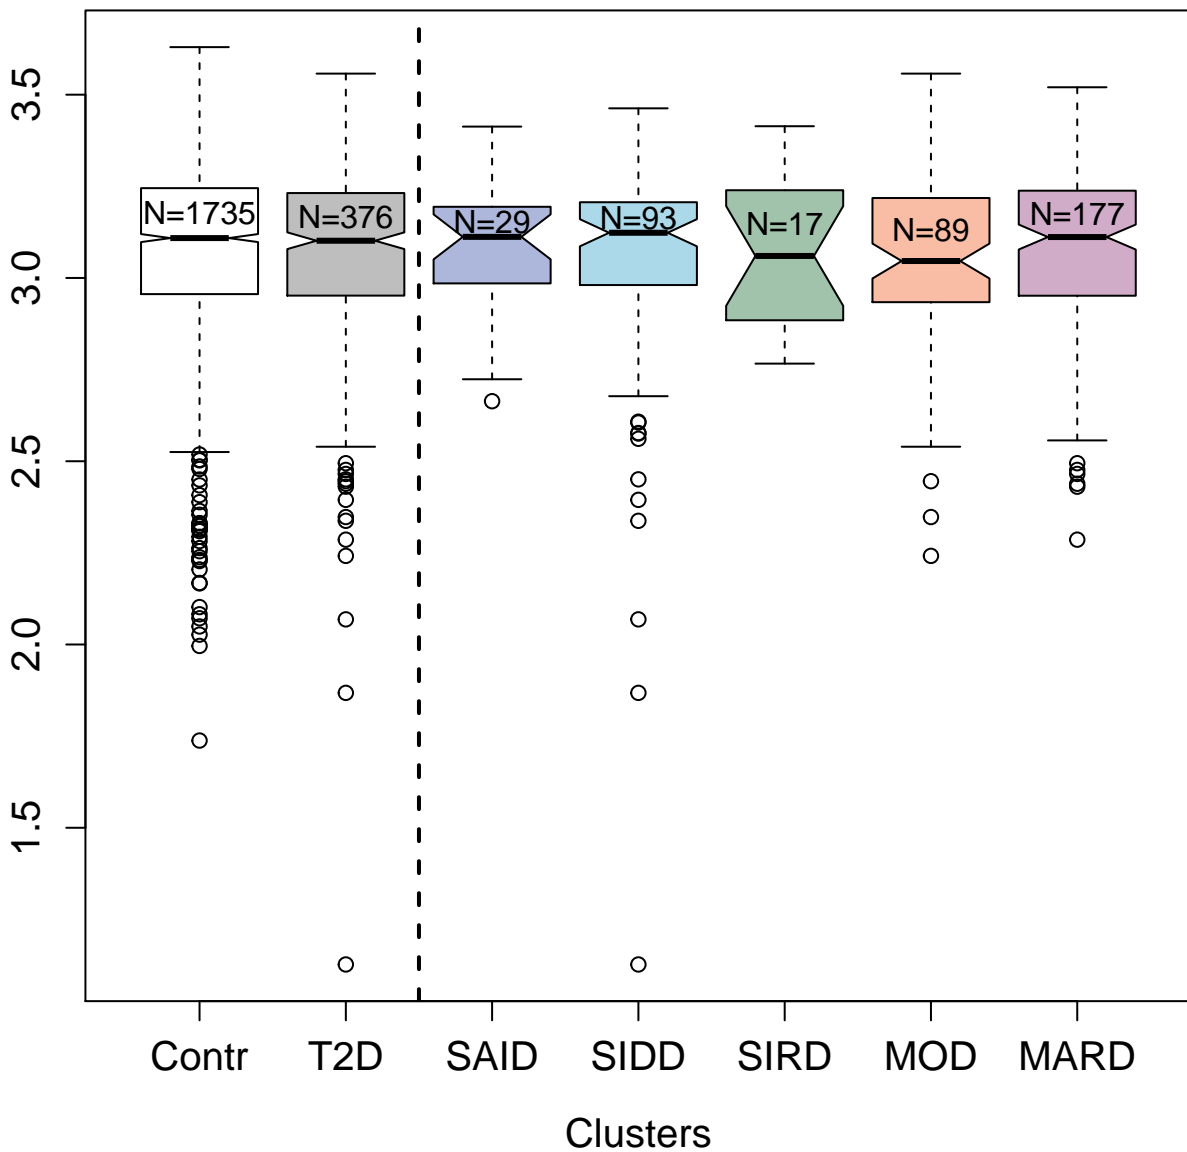

4987-17\_1 : Immunoglobulin alpha Fc receptor

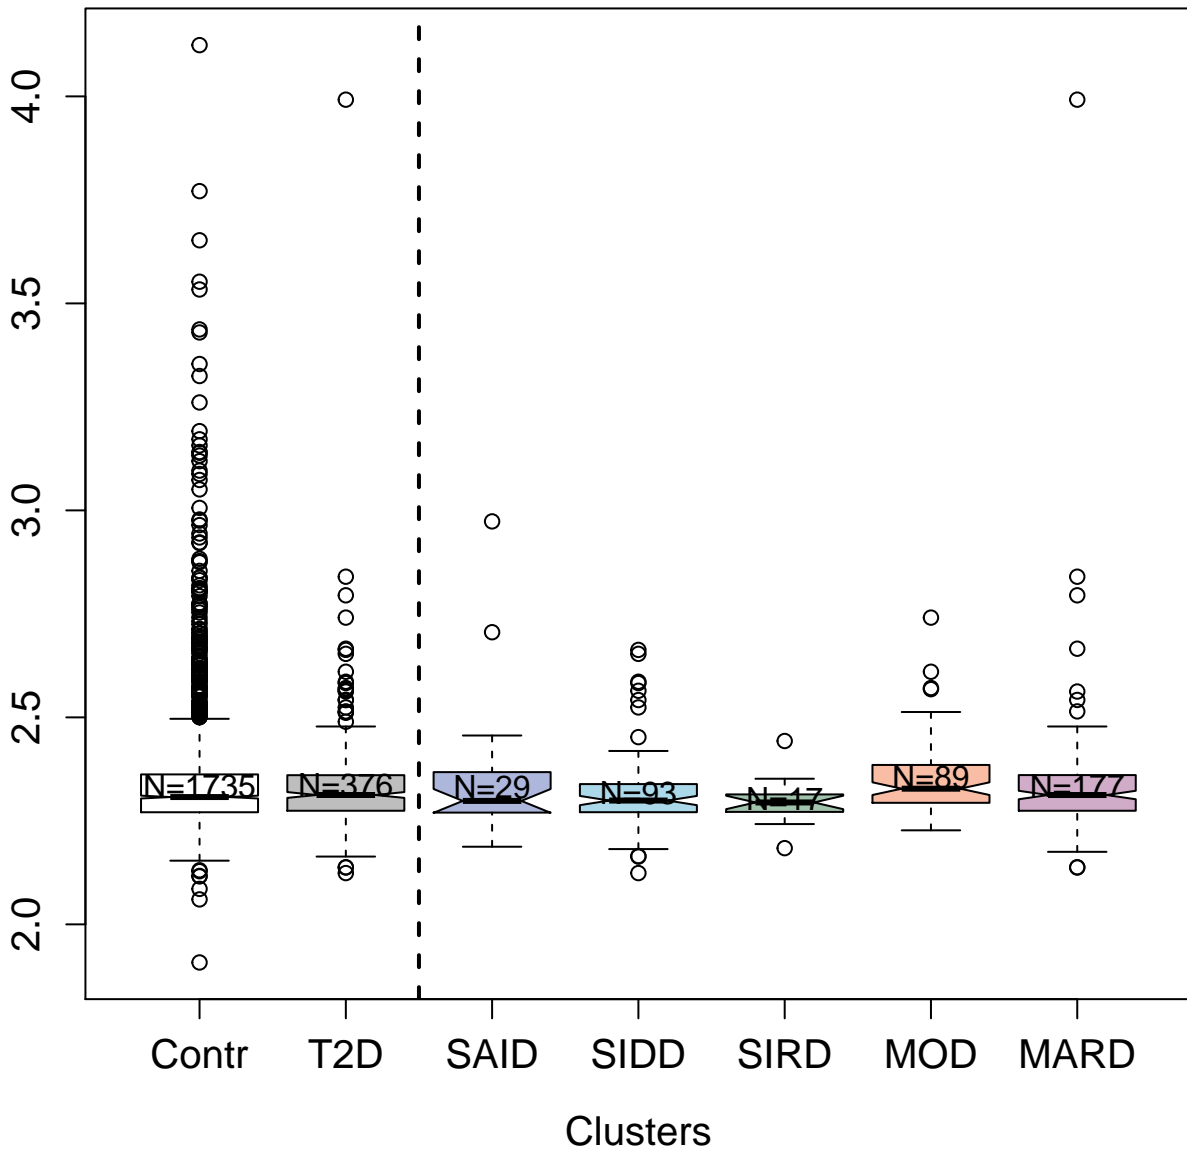

3316-58\_1 : Heparin cofactor 2

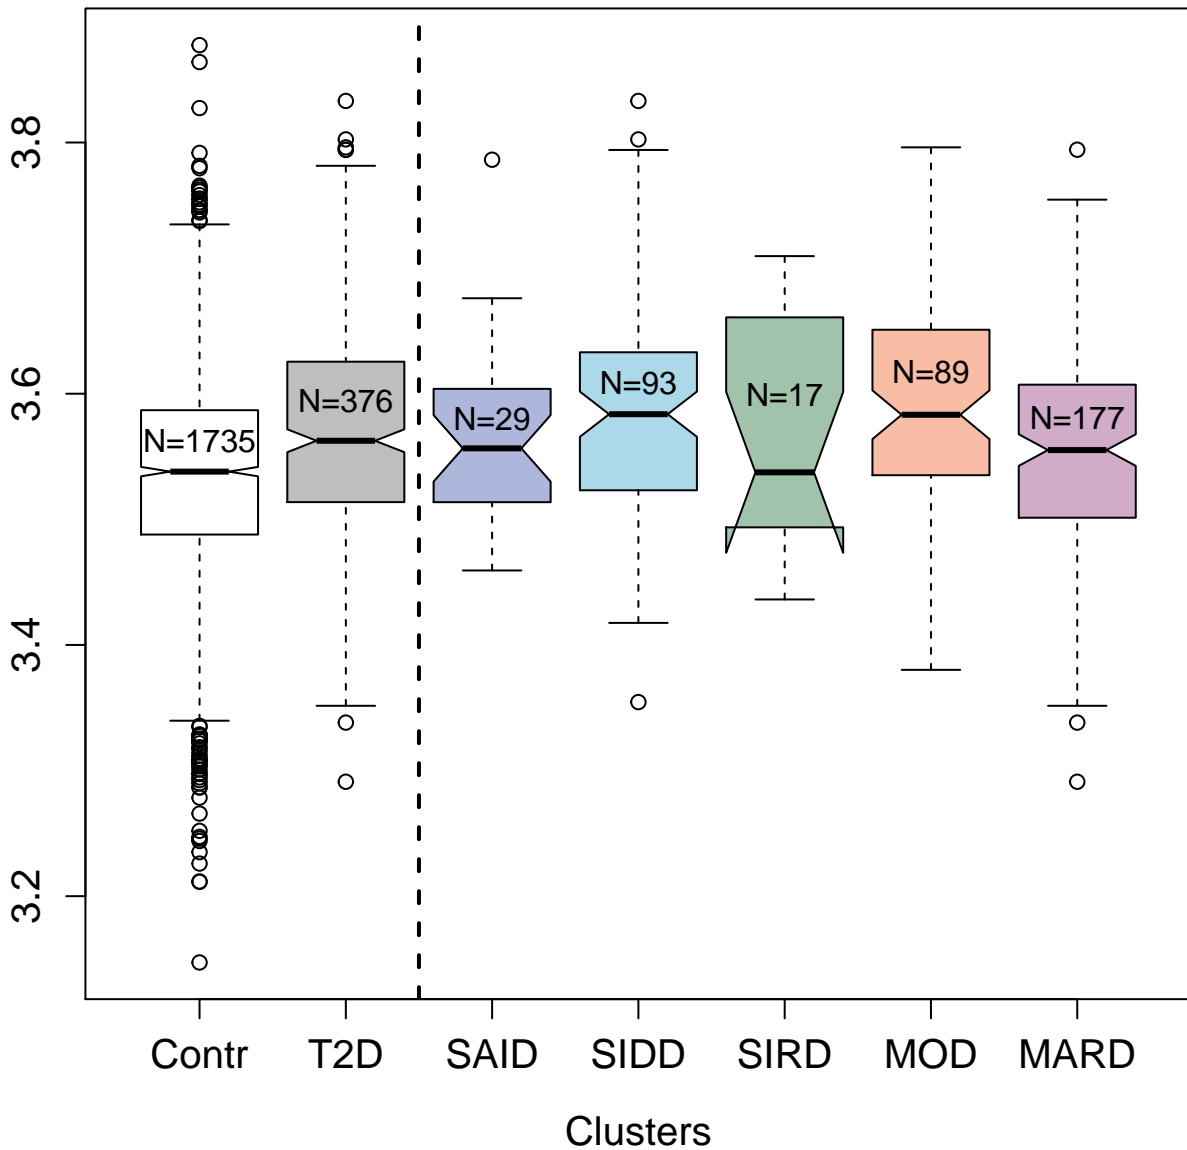

4569-52\_2 : VPS10 domain-containing receptor

SorCS2

2.5 3.0 3.5 4.0 4.5 5.0

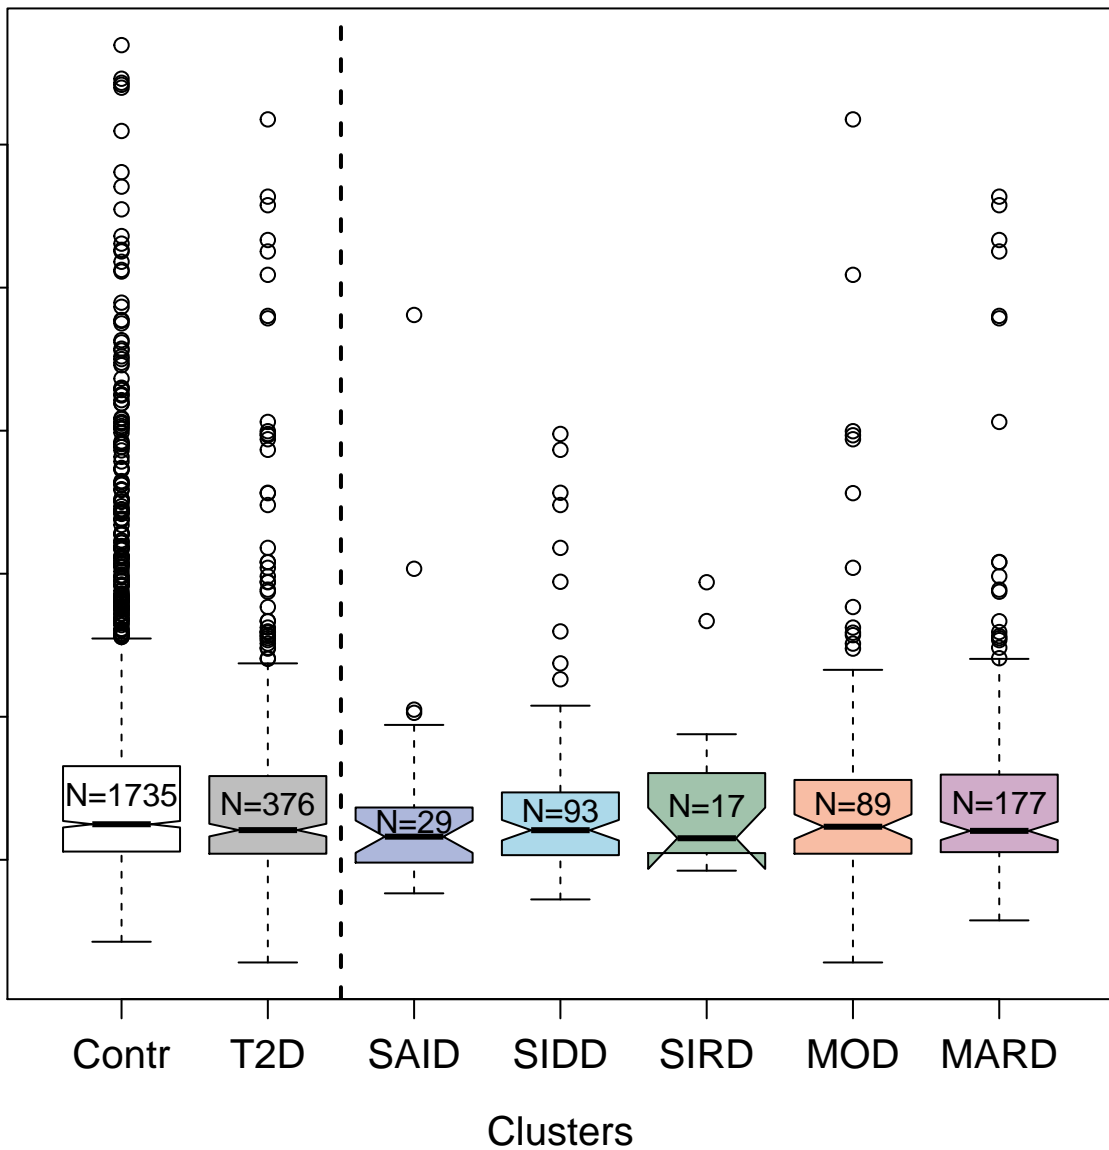

2967-8\_1 : Vascular cell adhesion protein 1

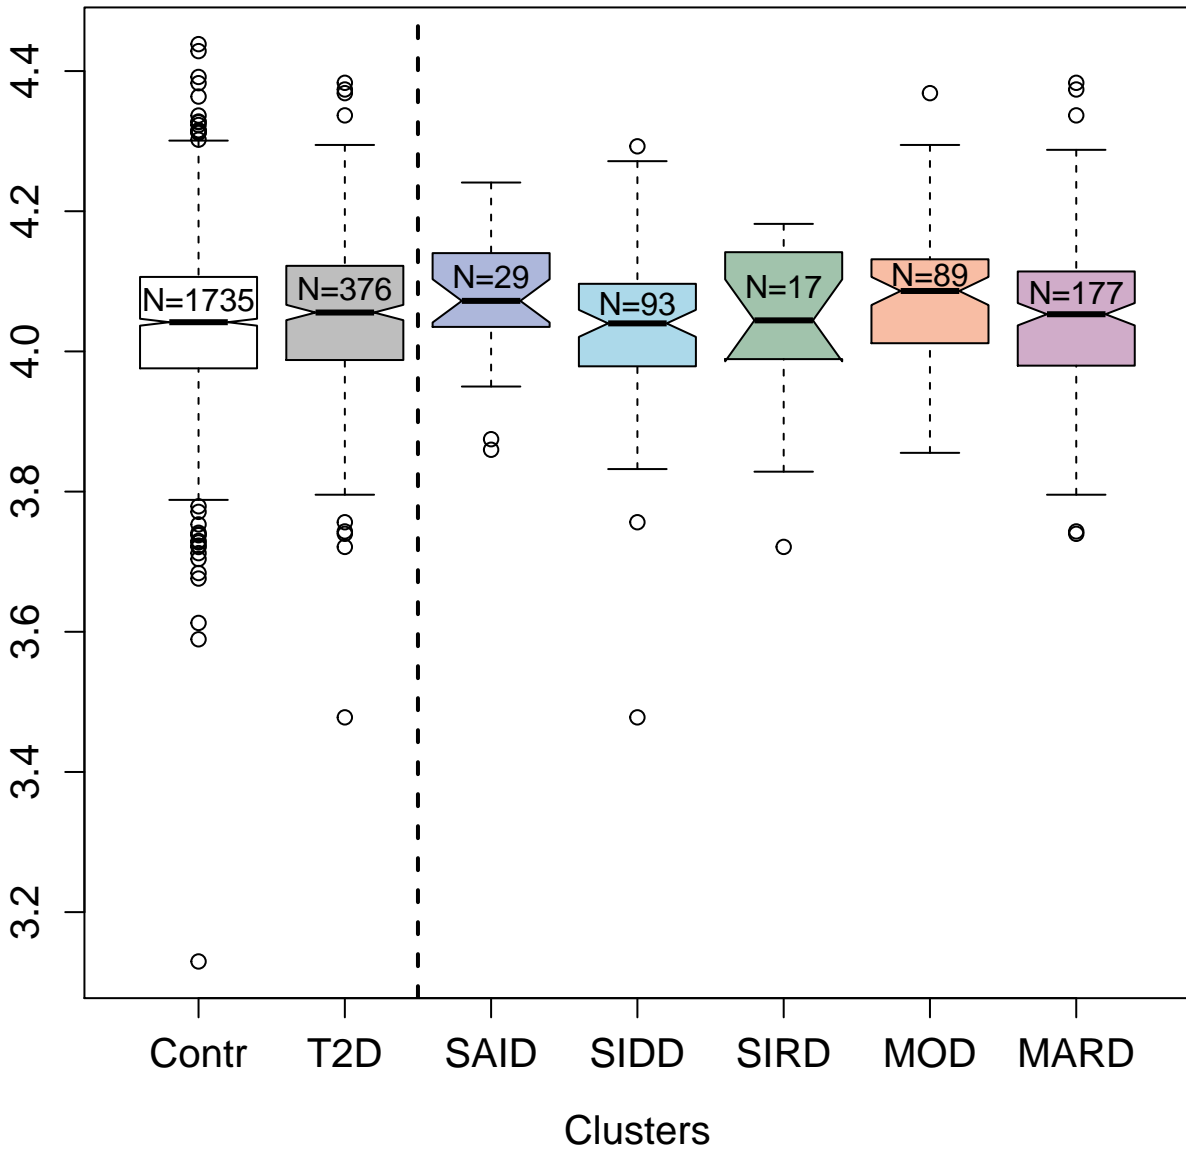



5822-22\_3 : Glial cell line-derived neurotrophic

factor

4.0

3.5

3.0

2.5

Contr

T2D

SAID

SIDD

SIRD

MOD

MARD

Clusters

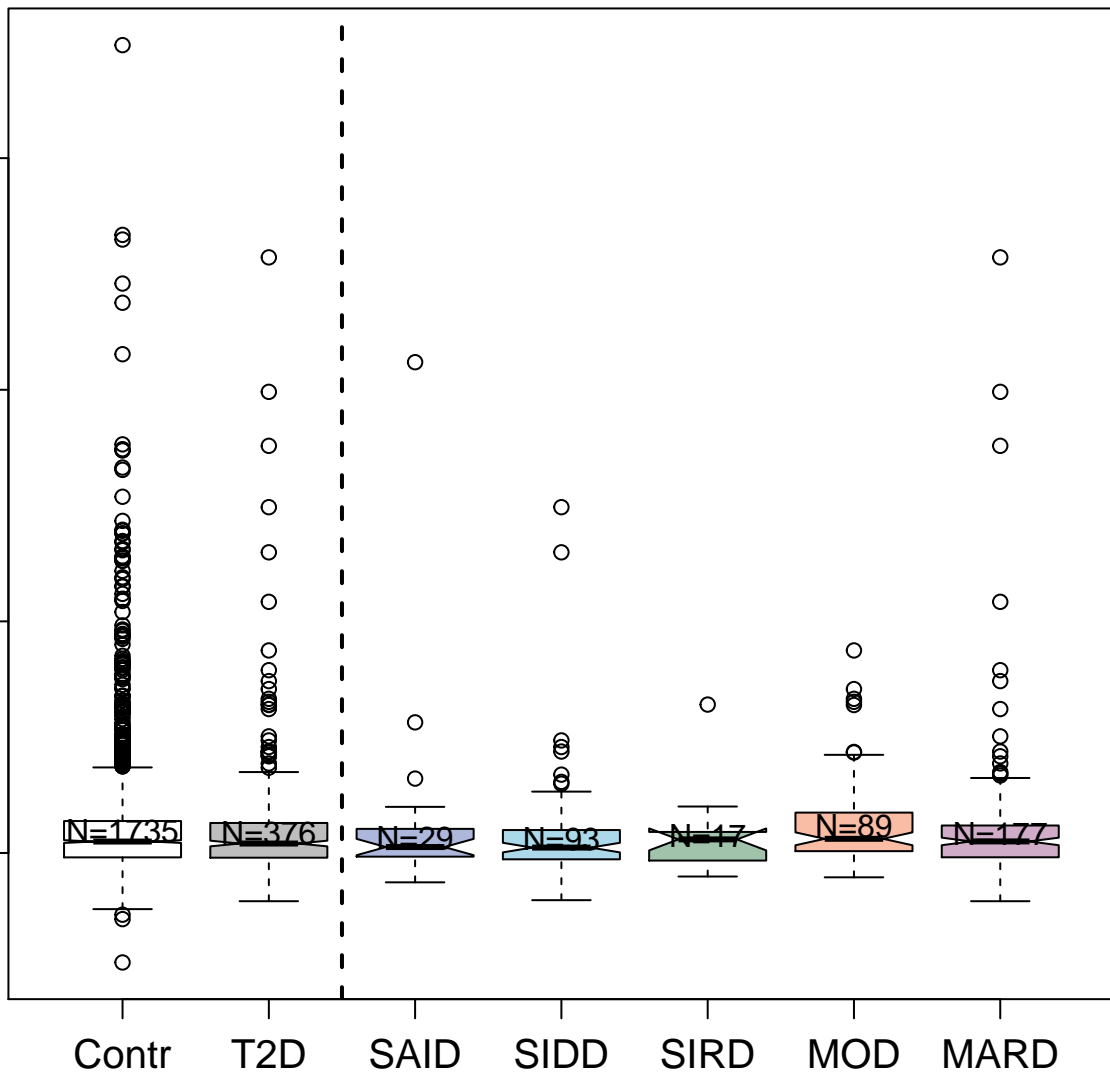

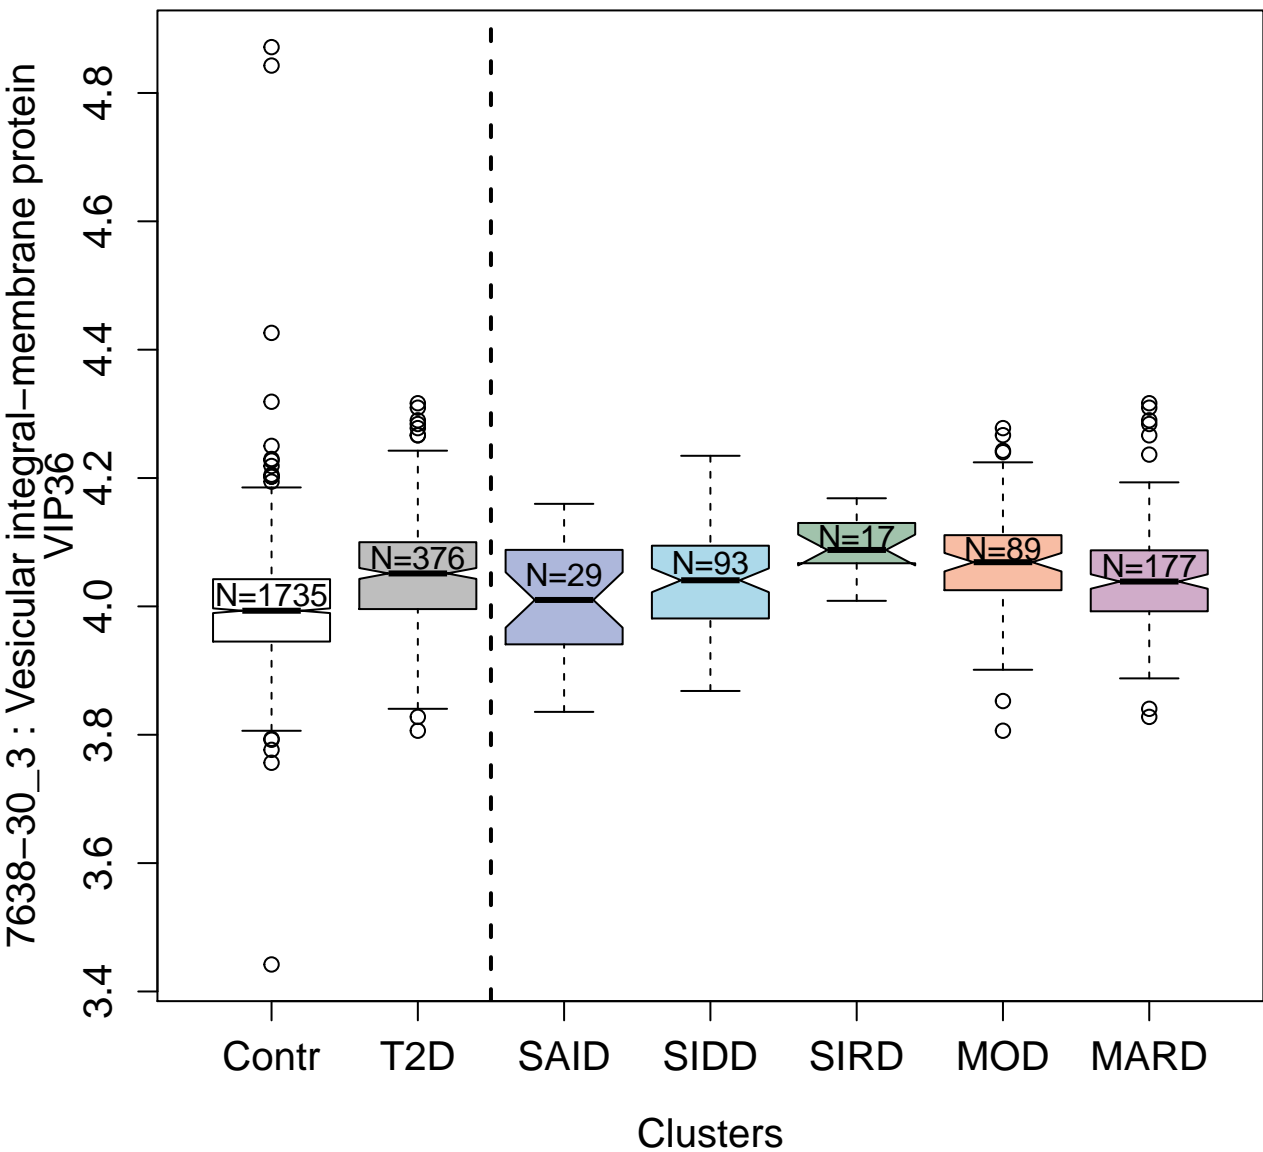

2851-63\_3 : C5a anaphylatoxin

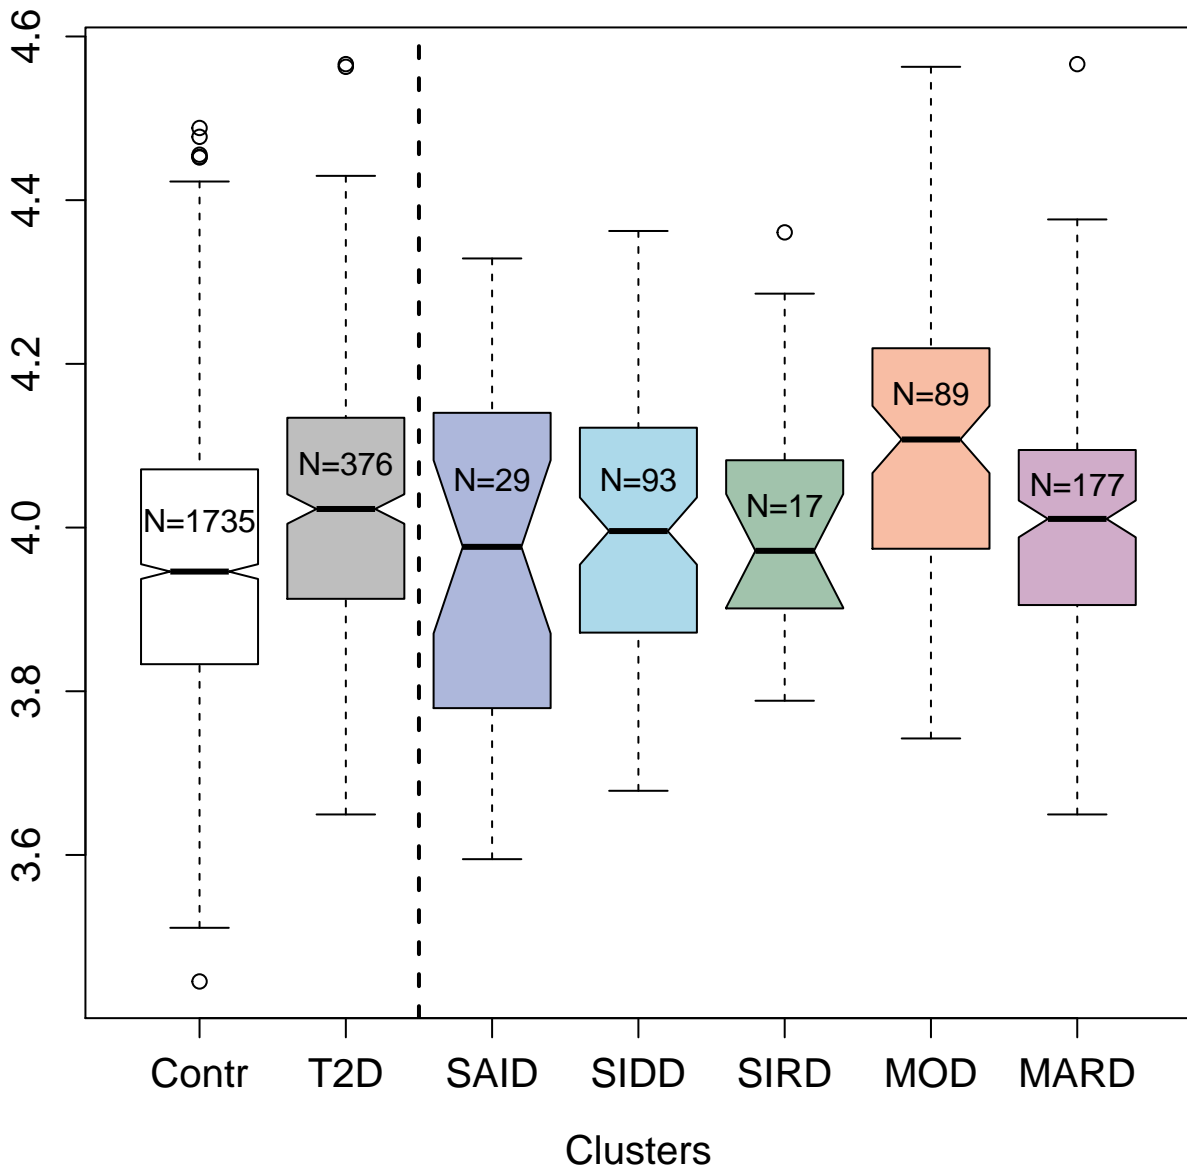

3202-28\_2 : Kremen protein 2

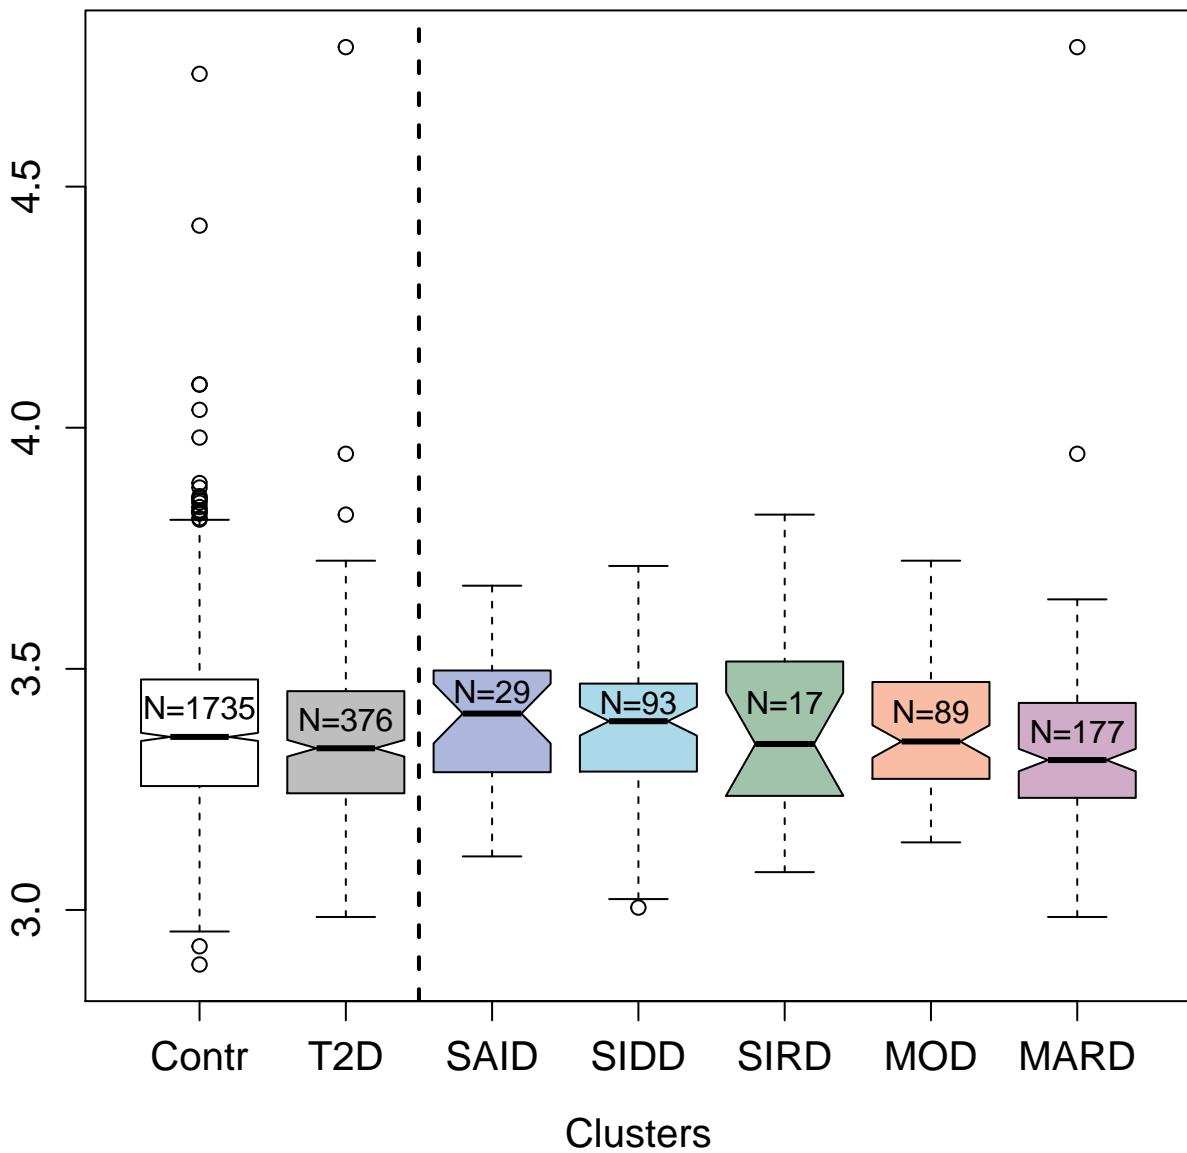

4127-75\_1 : Complement component C6

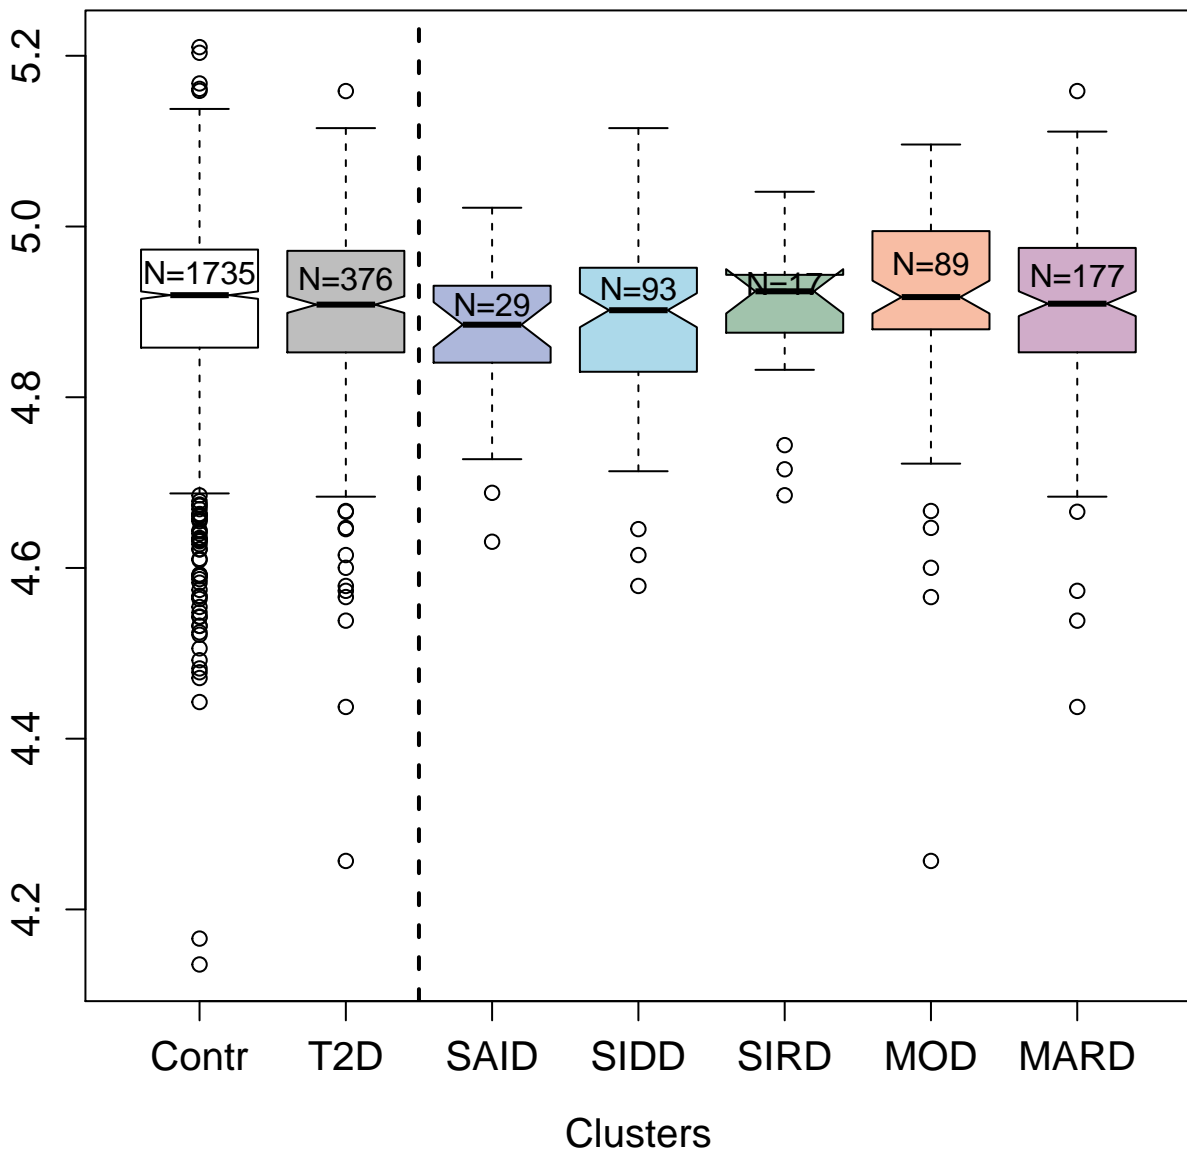

2843-13\_2 : Kunitz-type protease inhibitor 2

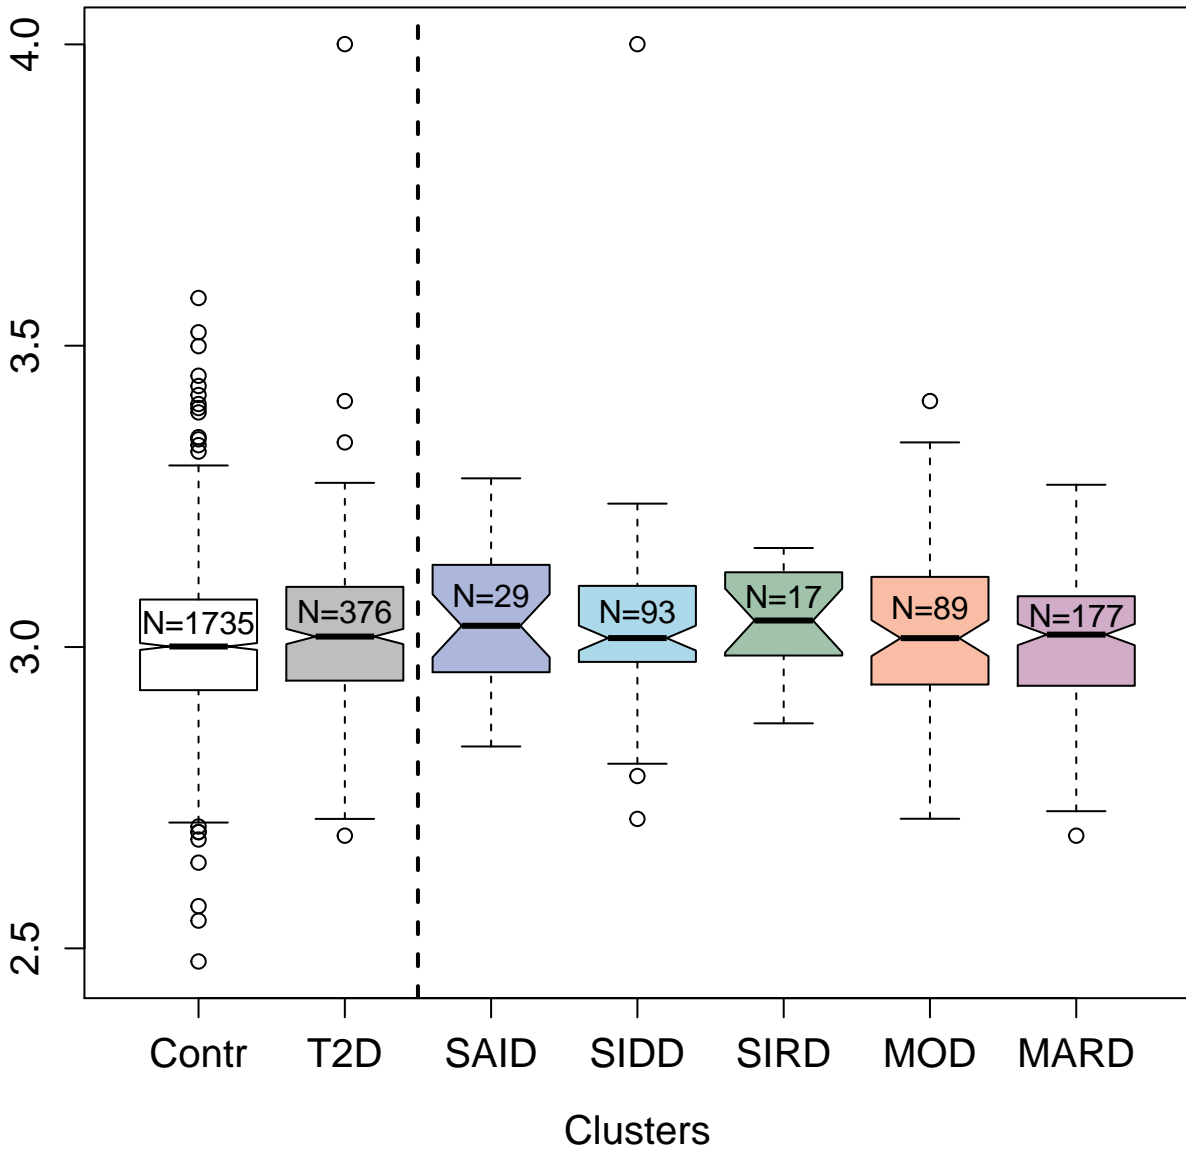

7648-9\_3 : Myosin-binding protein C; slow-type

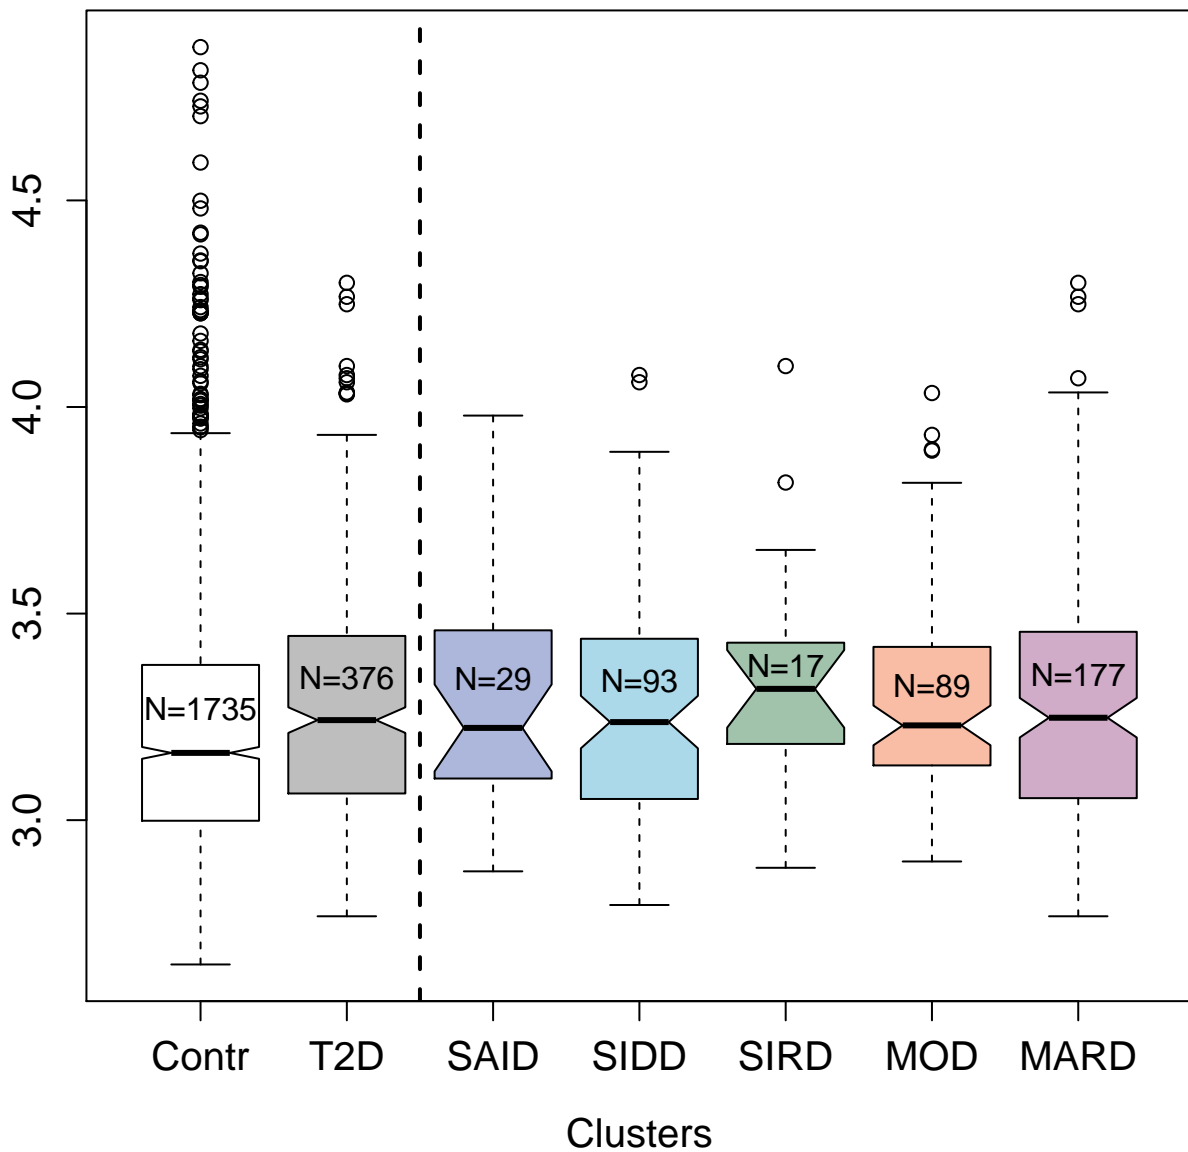

11081-1\_3 : Glycerol-3-phosphate dehydrogenase  
[NAD(+)]; cytoplasmic

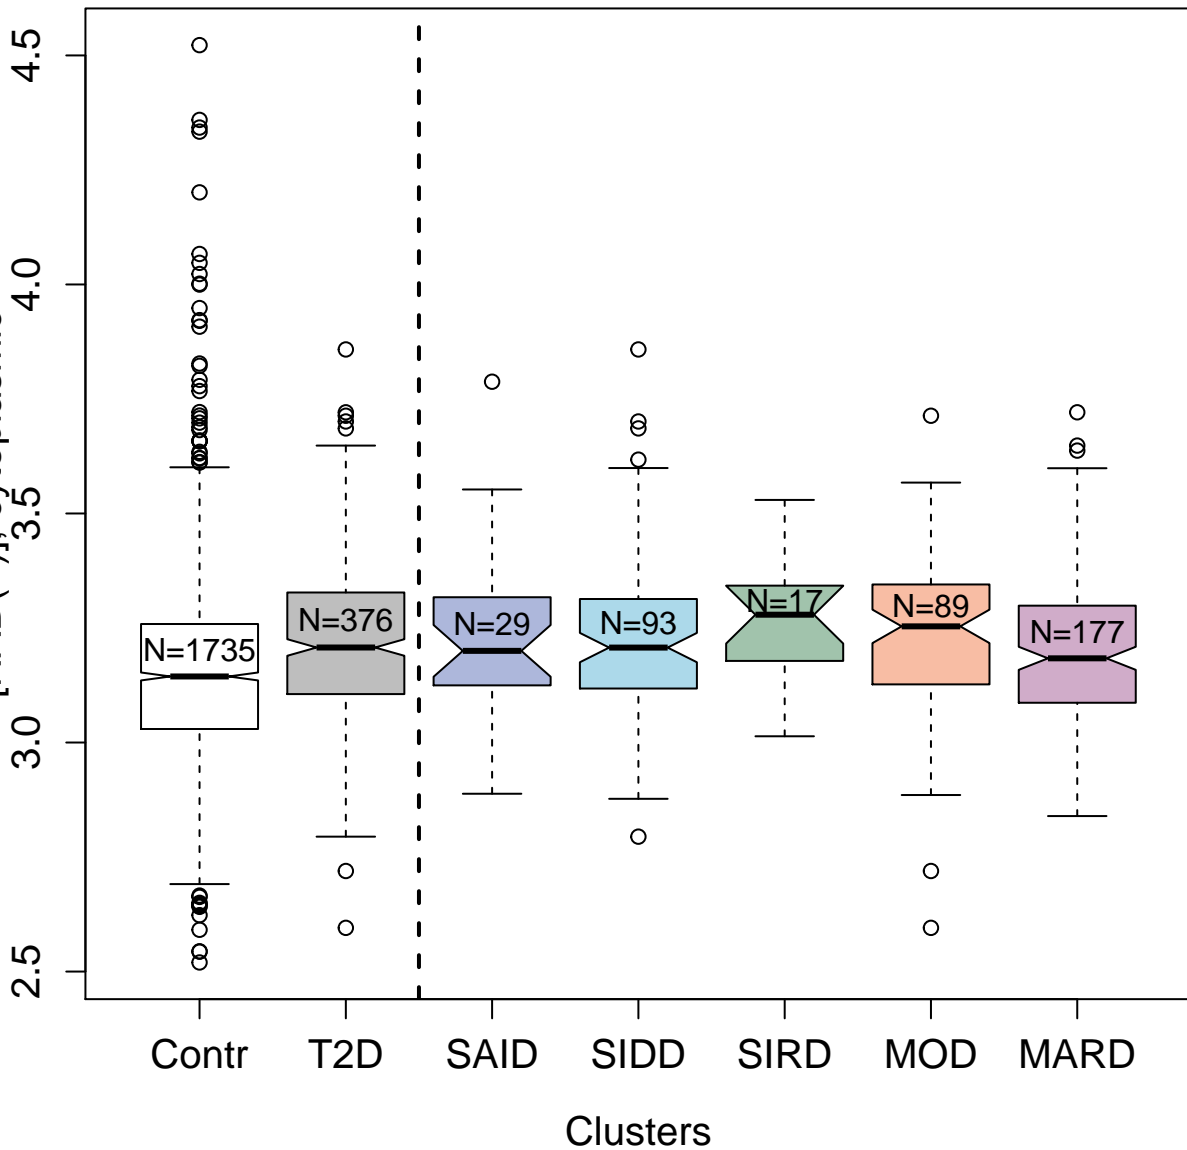



2734-49\_4 : Natural cytotoxicity triggering receptor 2

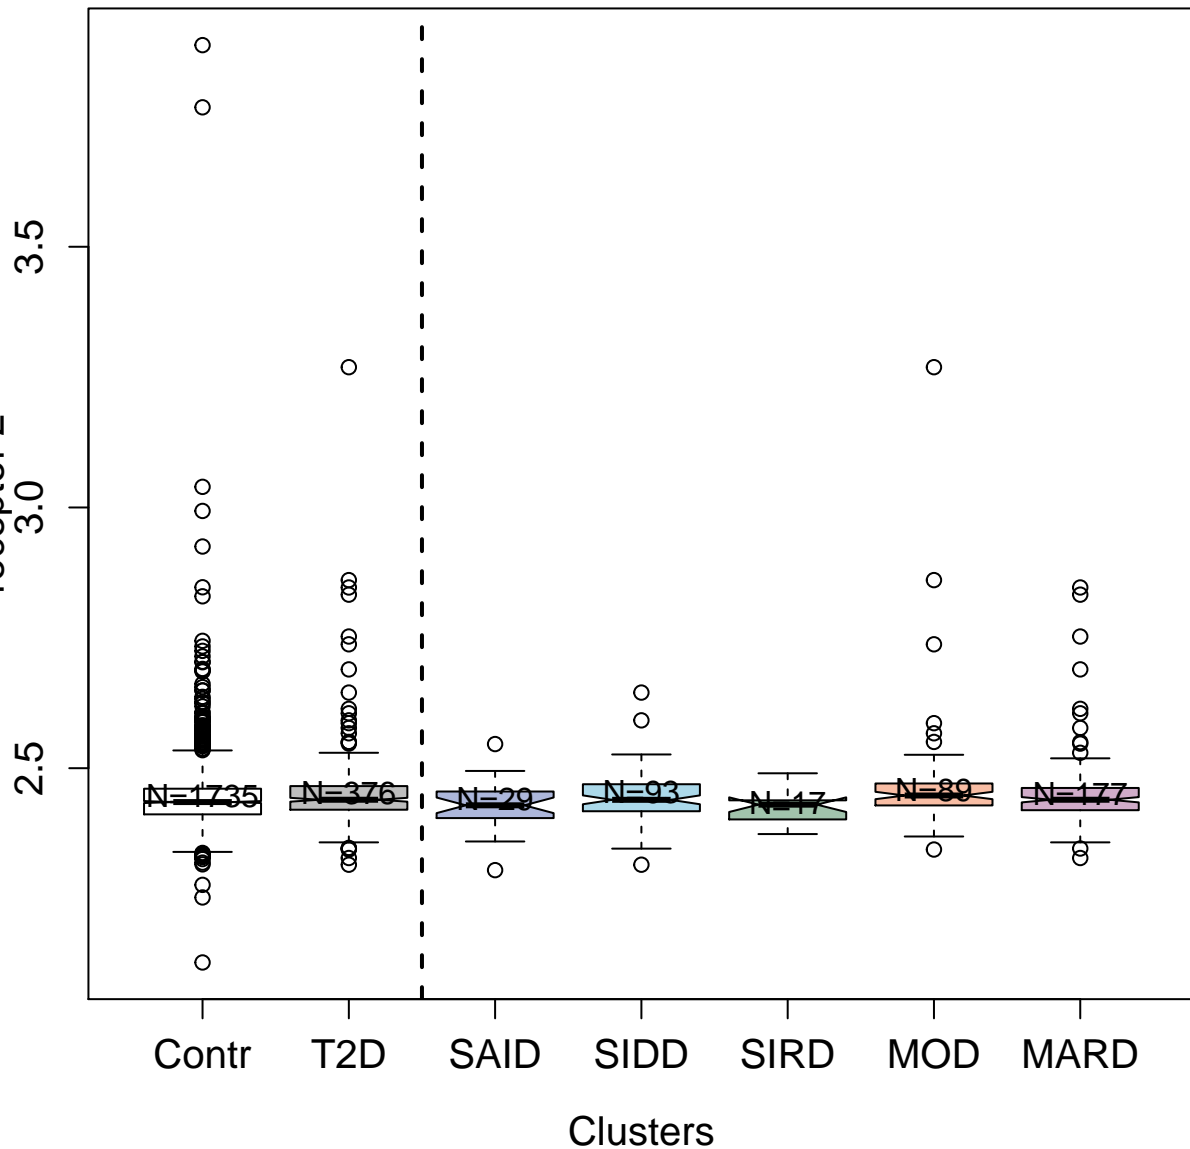

2837-3\_2 : Hepatocyte growth factor receptor

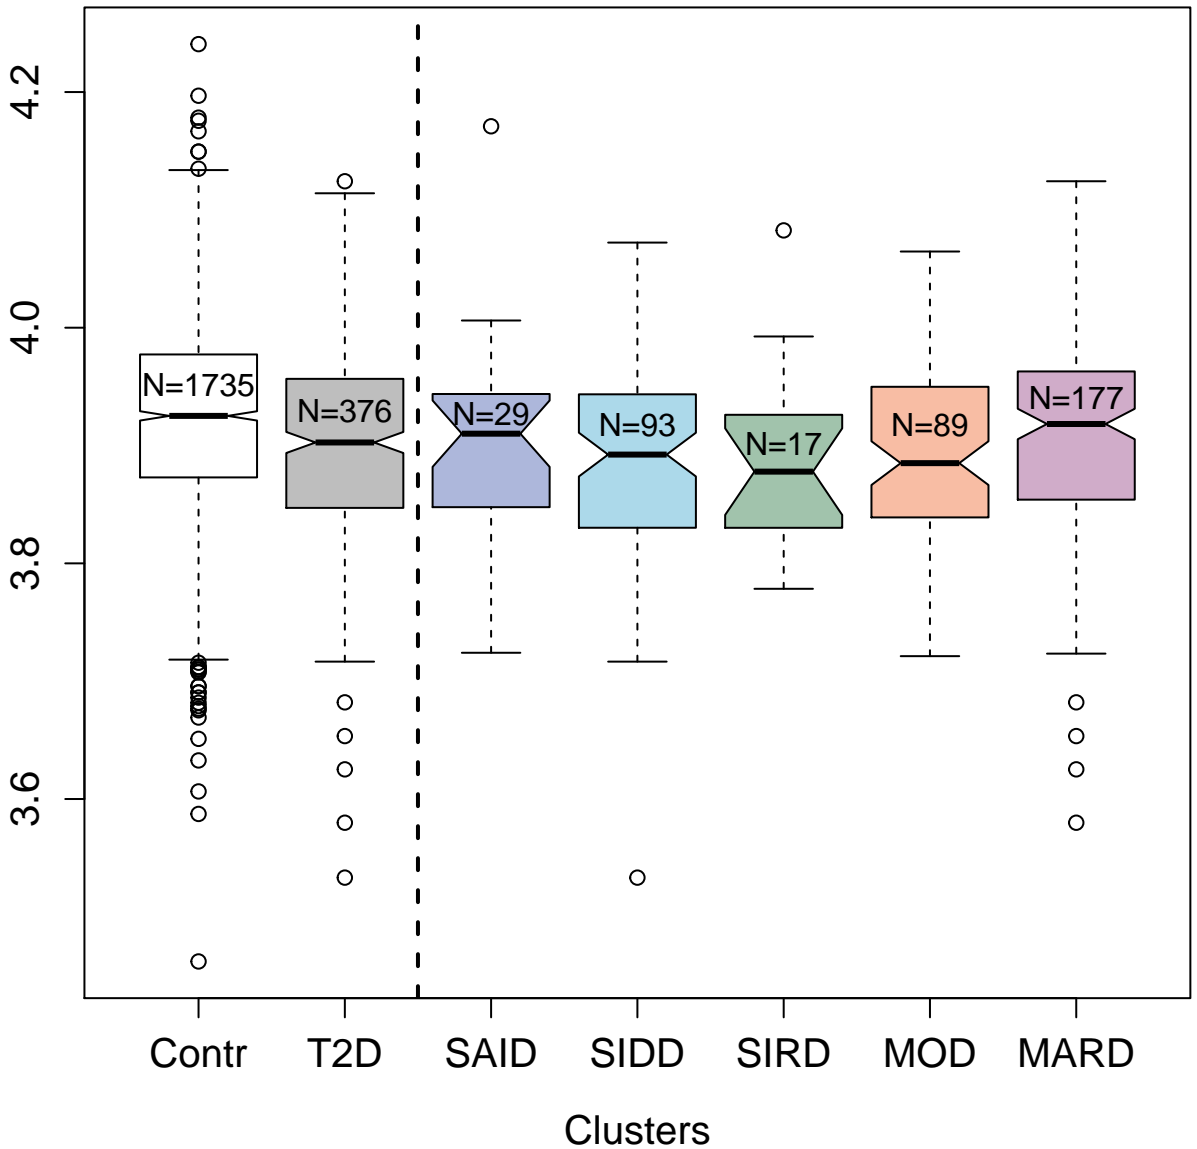



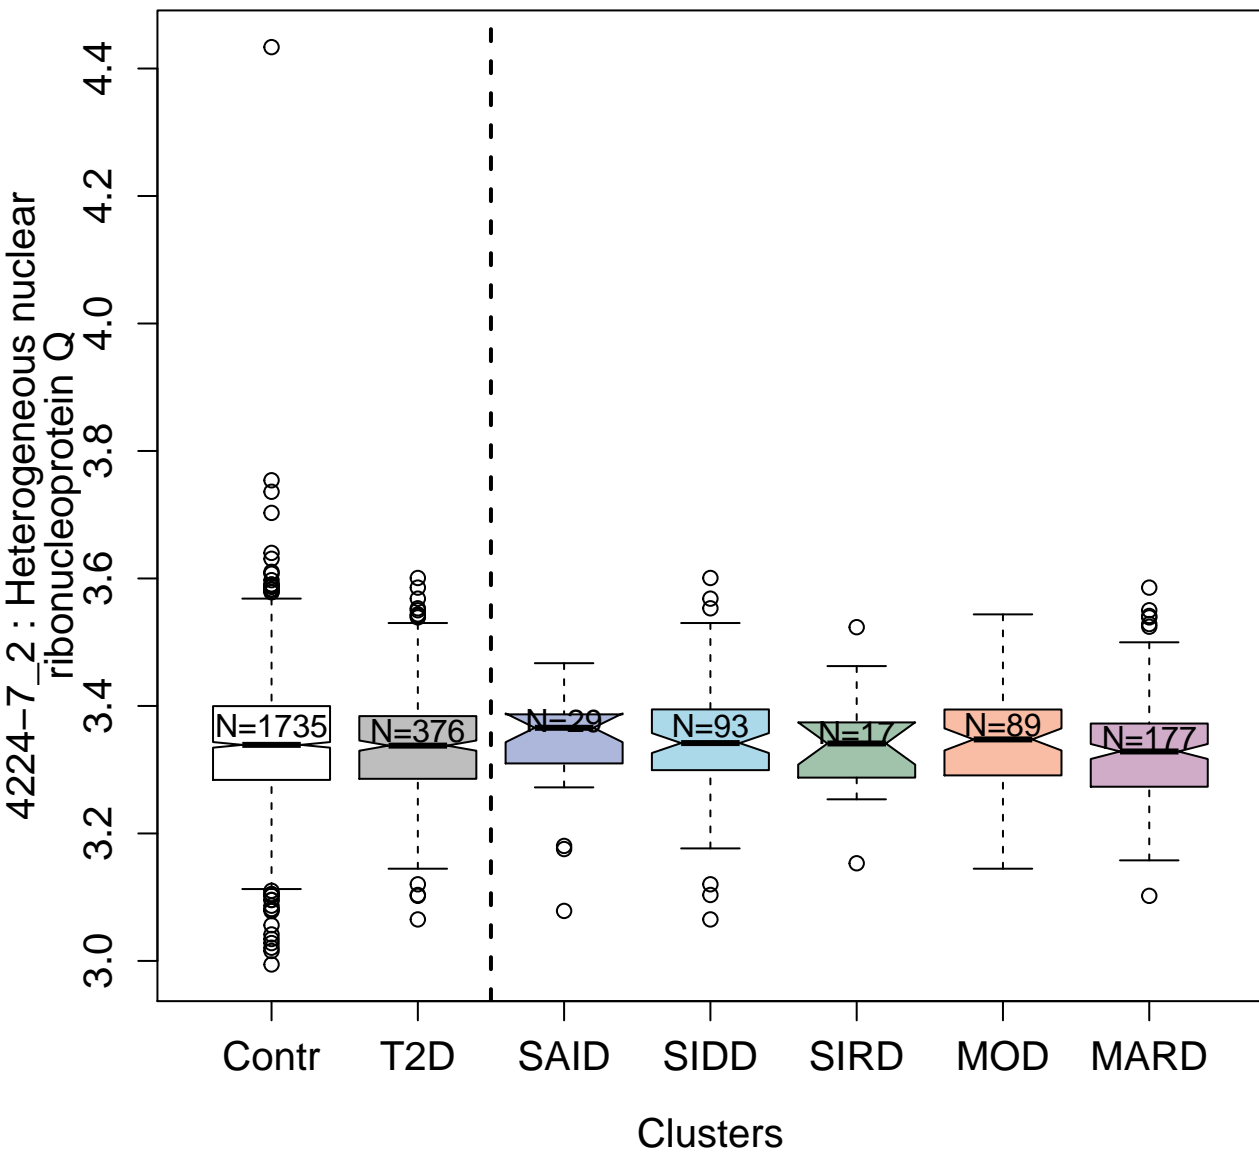

11071-1\_3 : Interleukin-5

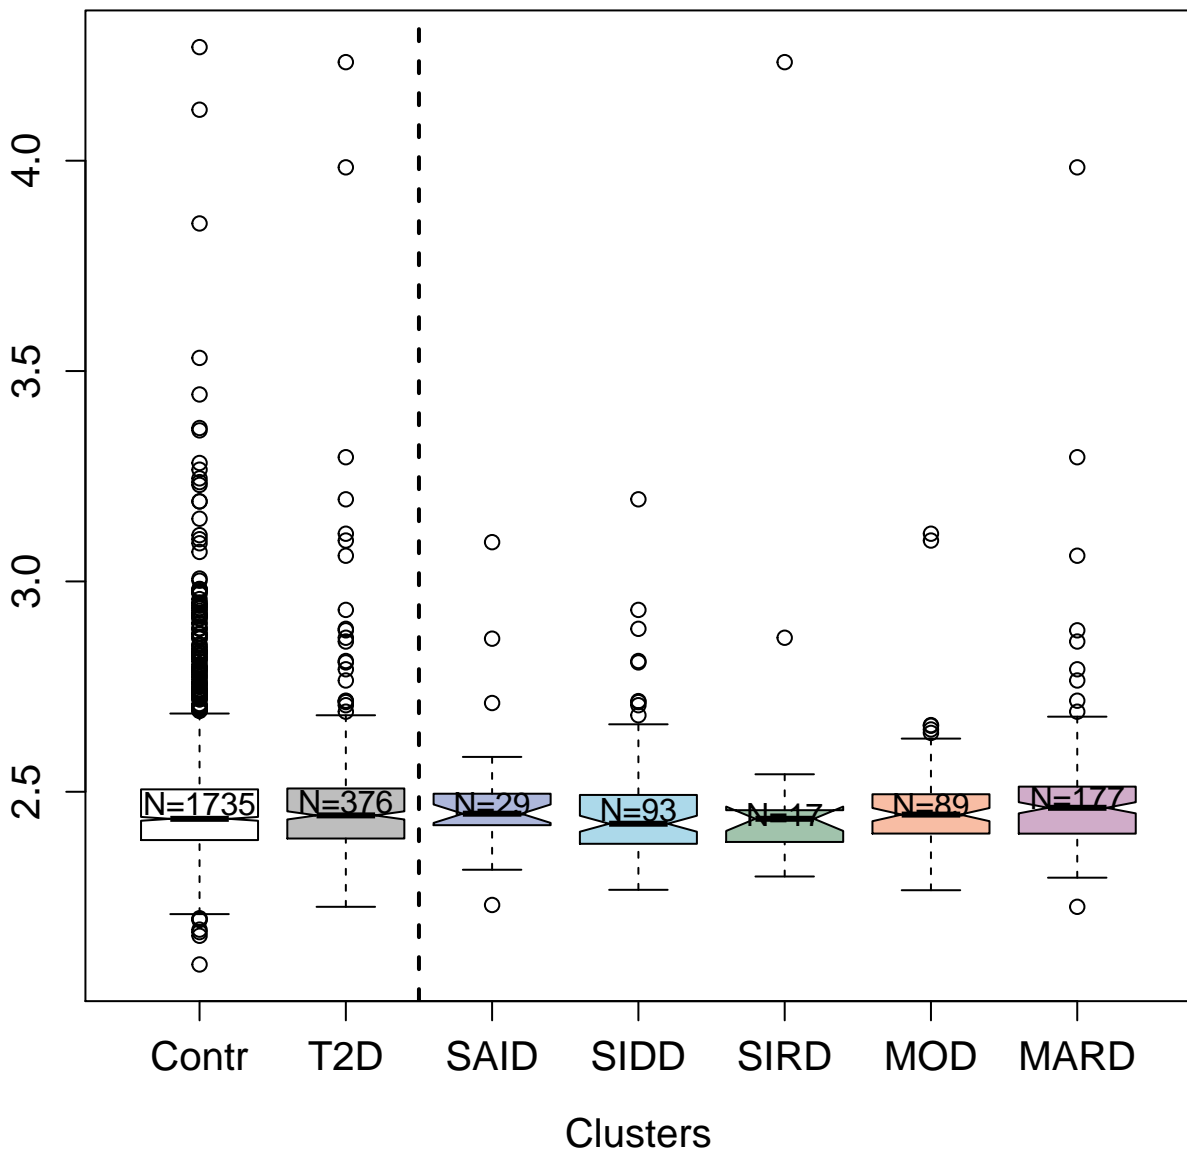

5460-60\_3 : ATP-dependent RNA helicase DDX19B

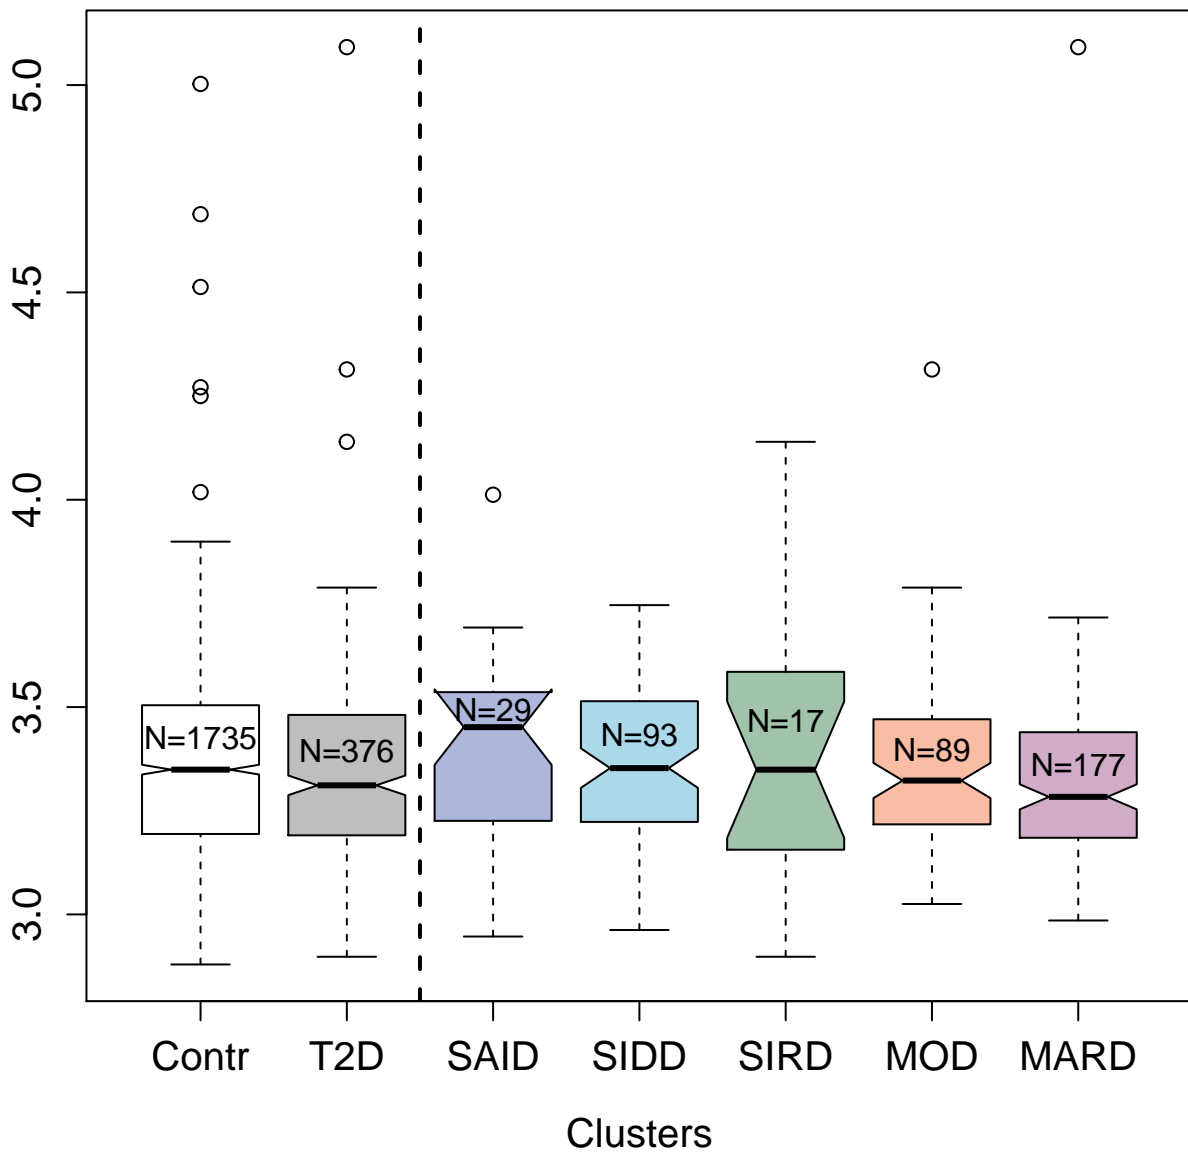

4304-18\_2 : Ligand-dependent nuclear receptor corepressor-like protein

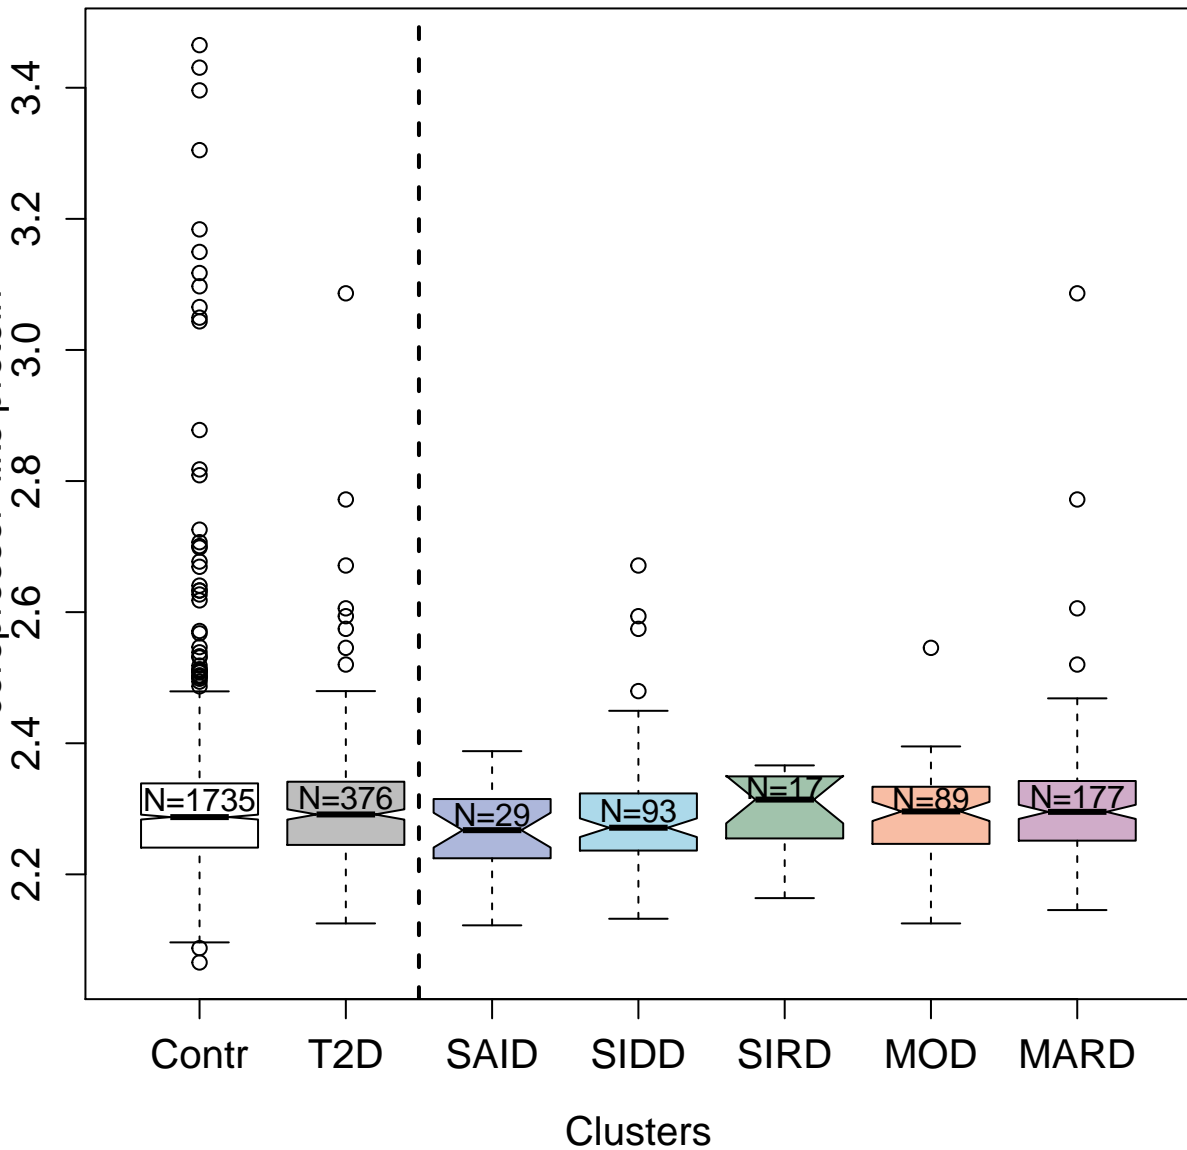

11516-7\_3 : Fatty acid-binding protein; liver

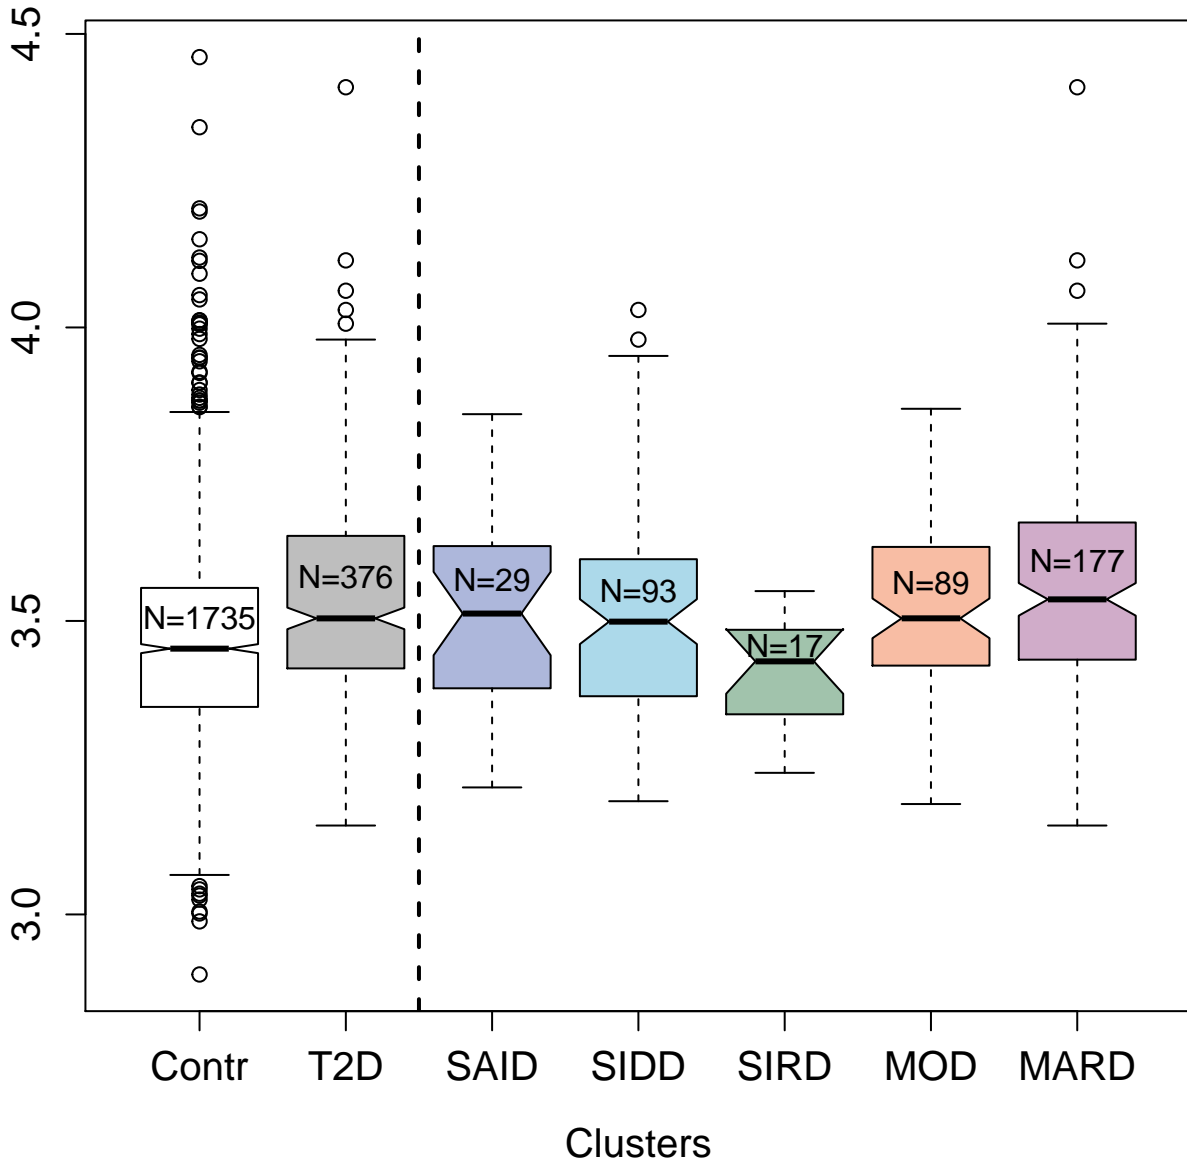



4543-65\_2 : Collagen alpha-1(XXIII) chain

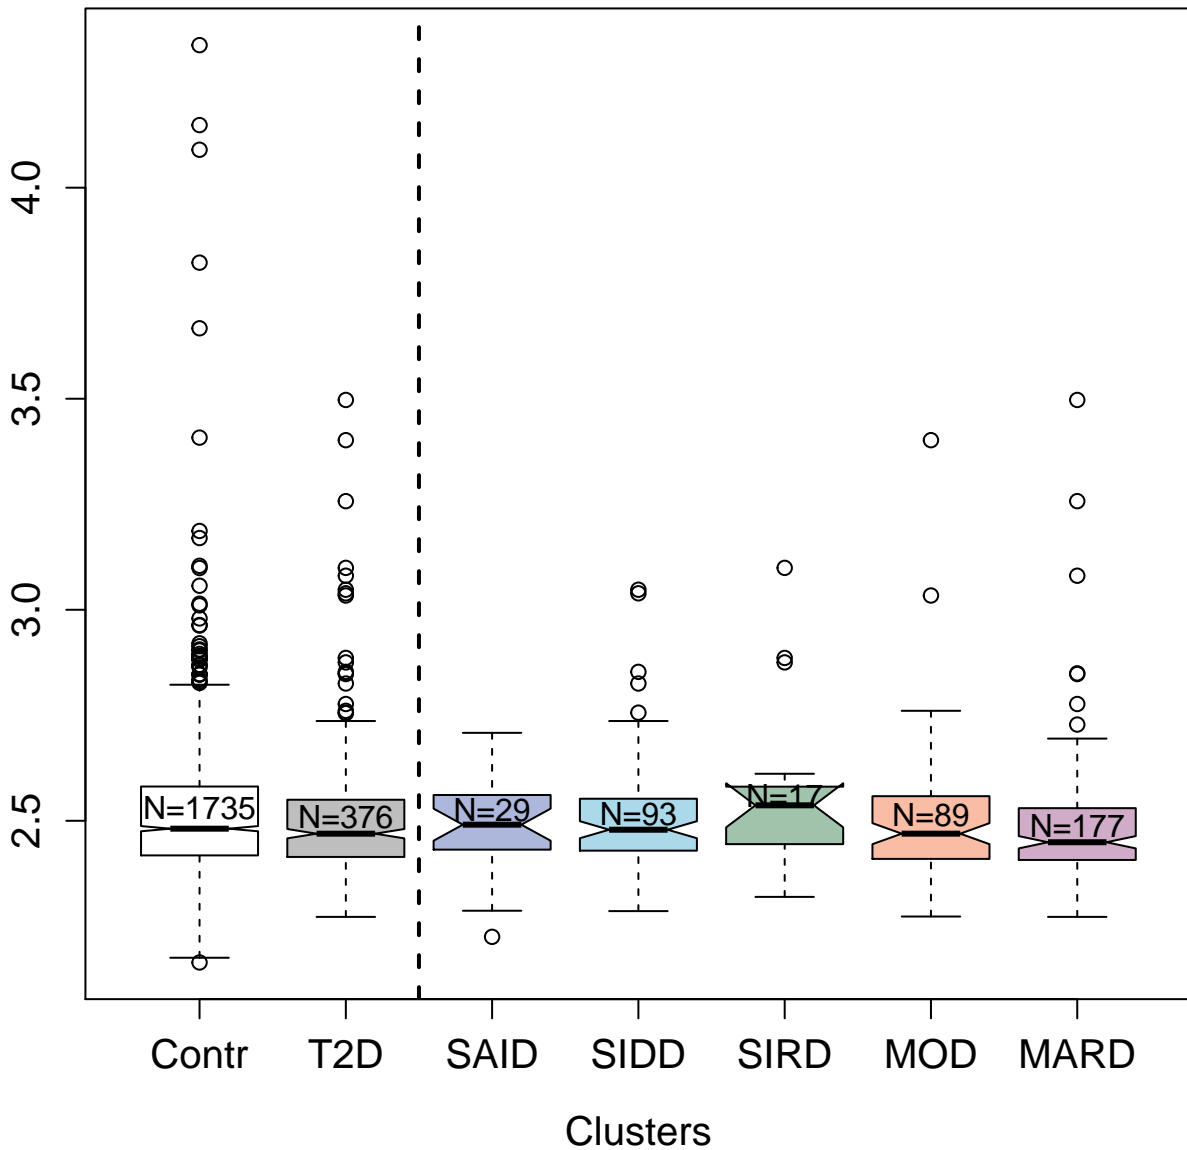

2841-13\_2 : Secreted frizzled-related protein 3

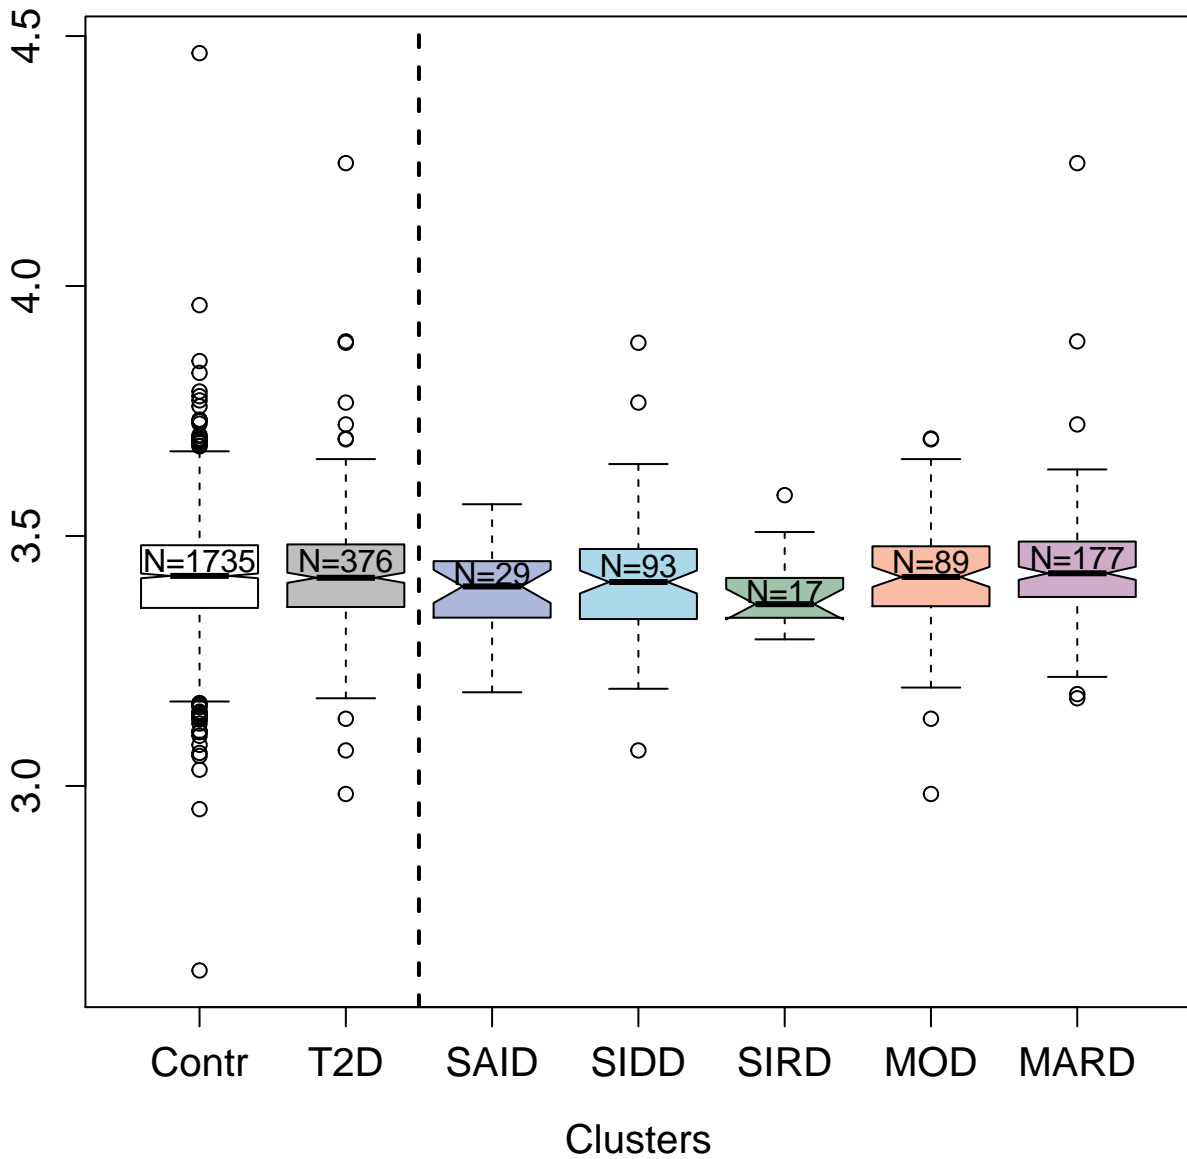

3445-53\_2 : Interleukin-15 receptor subunit alpha

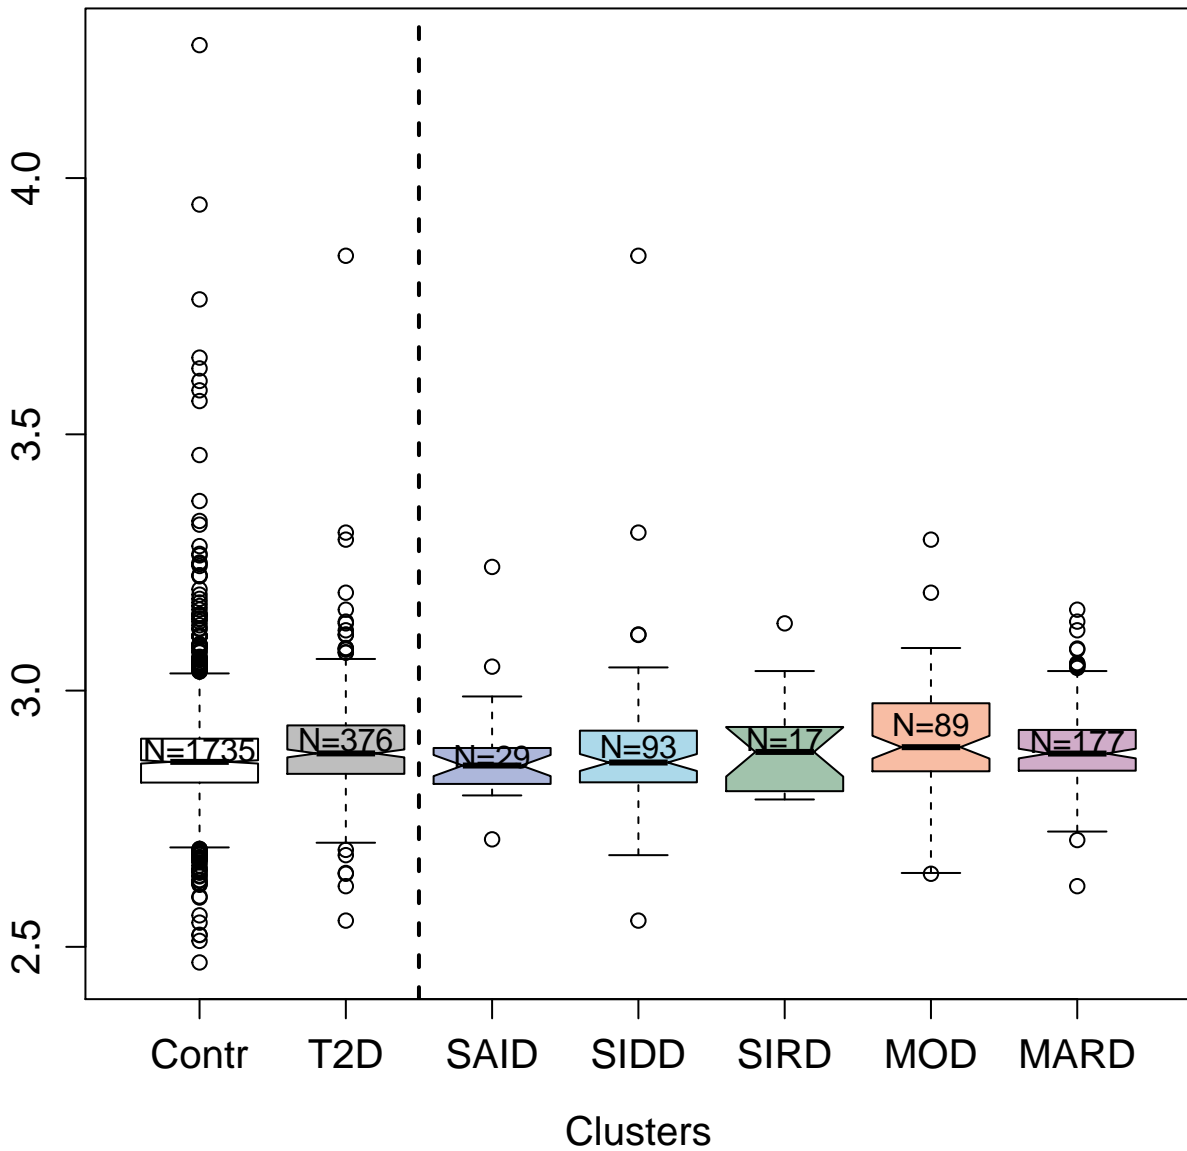

5903-91\_2 : Heat shock cognate 71 kDa protein

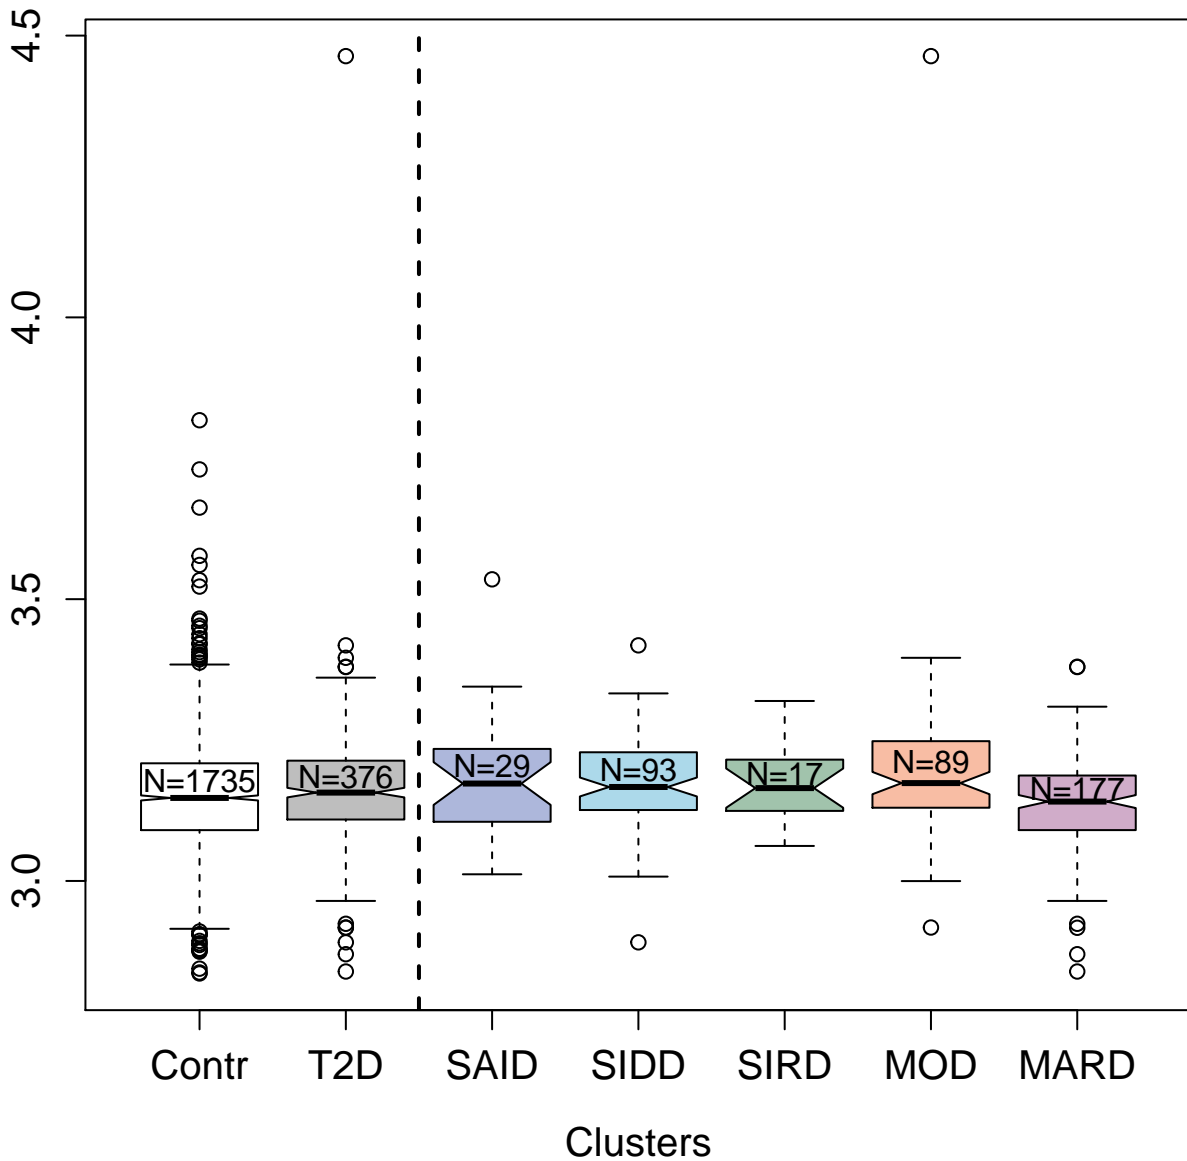

3831-21\_1 : Phosphatidylinositol  
3,4,5-trisphosphate 3-phosphatase and  
2,5-bisphosphate protein phosphatase PTEN4.5

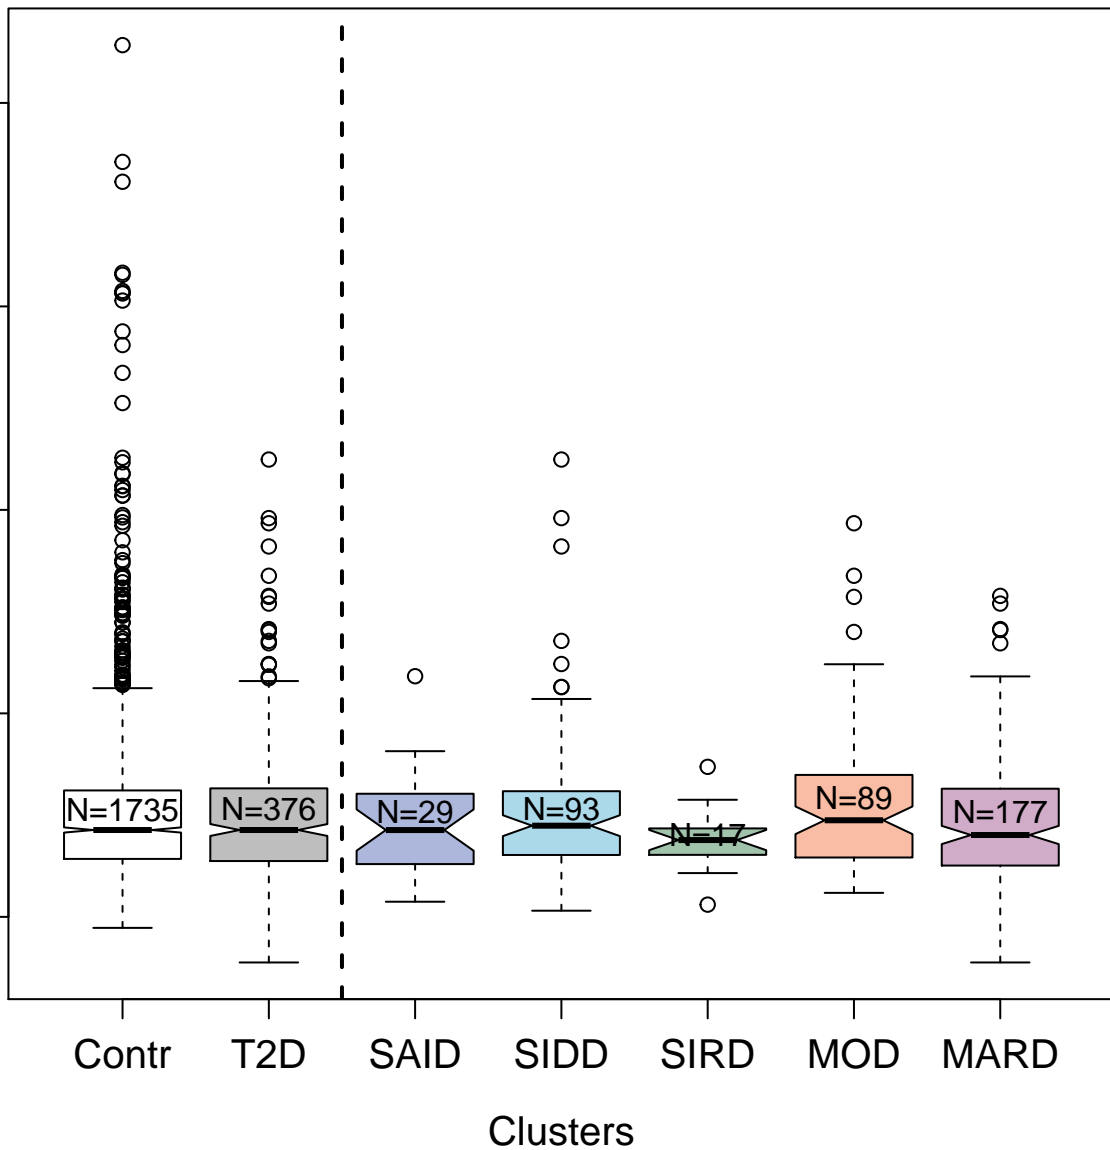

5229-90\_3 : Inosine-5'-monophosphate dehydrogenase 1

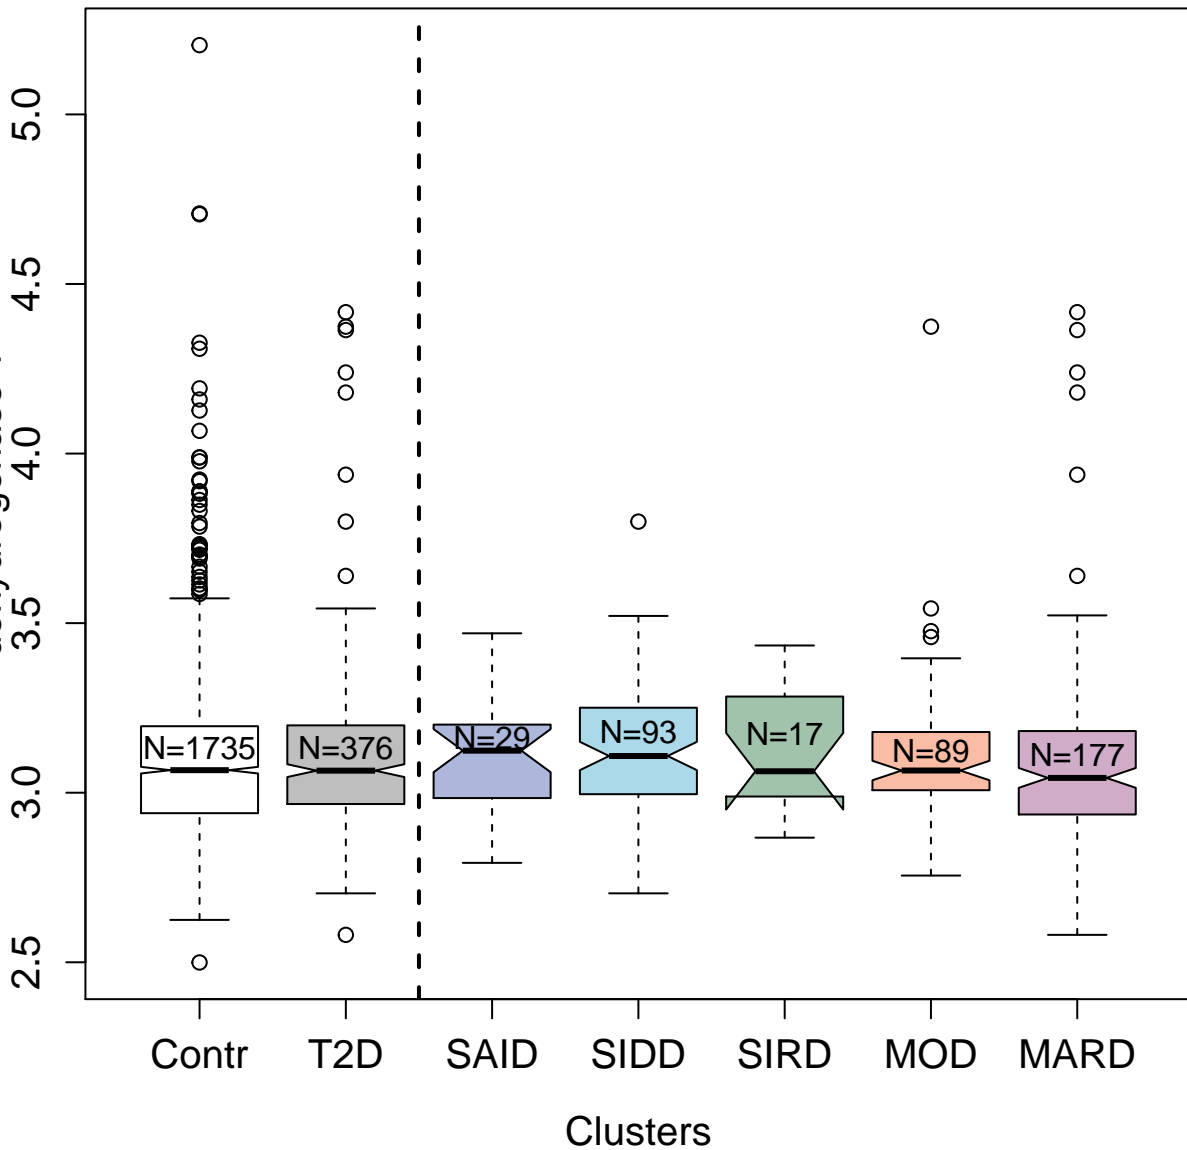

# 3357-67\_2 : Cyclin-dependent kinase 2:Cyclin-A2 complex

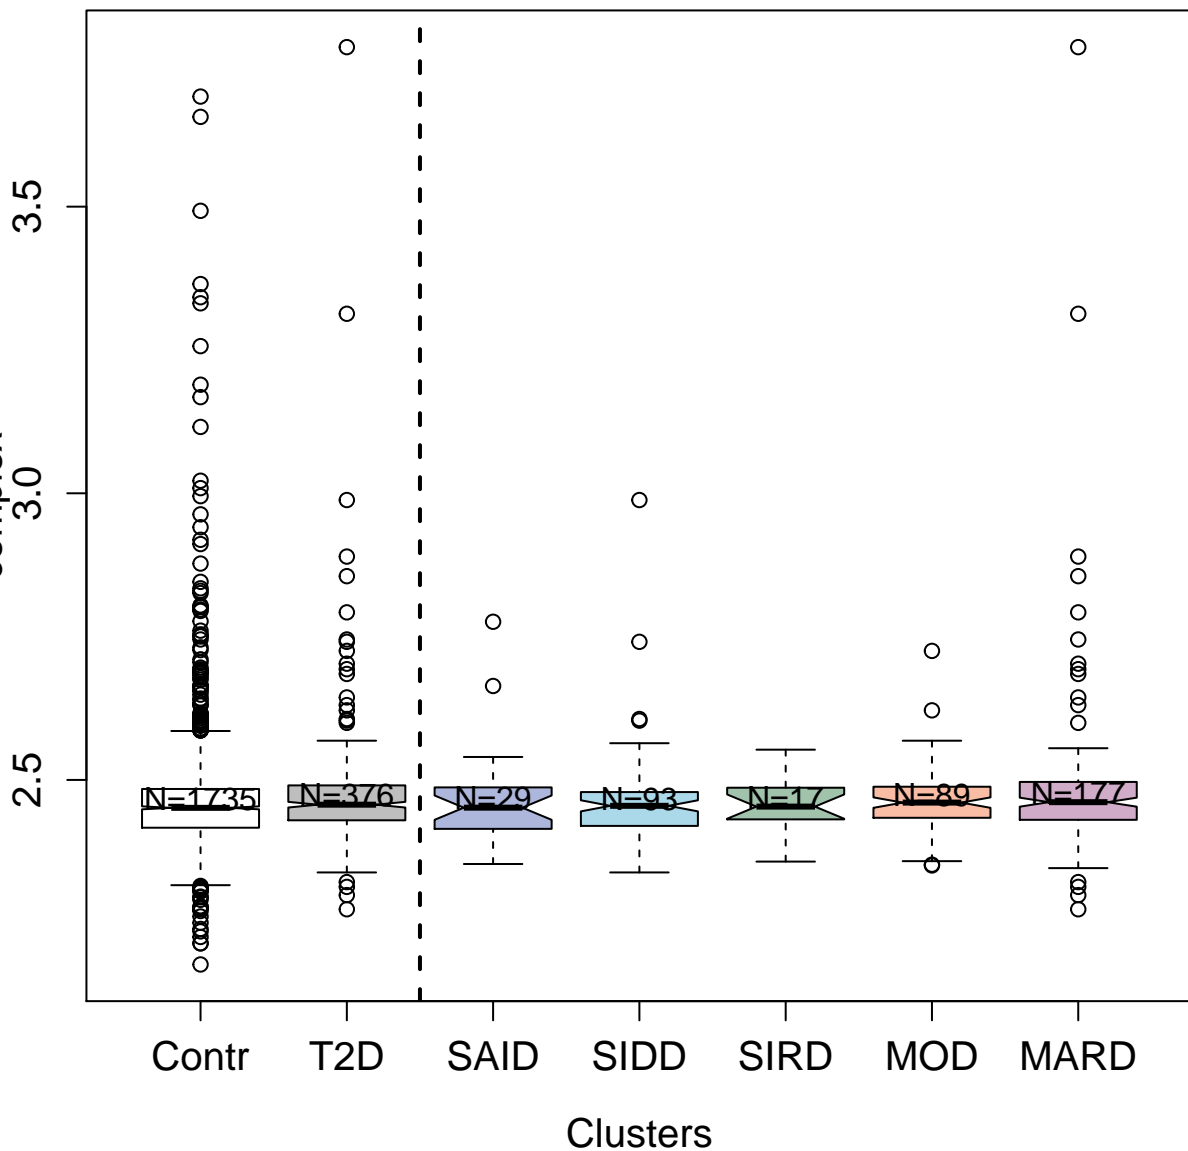

3487-32\_2 : C-X-C motif chemokine 13

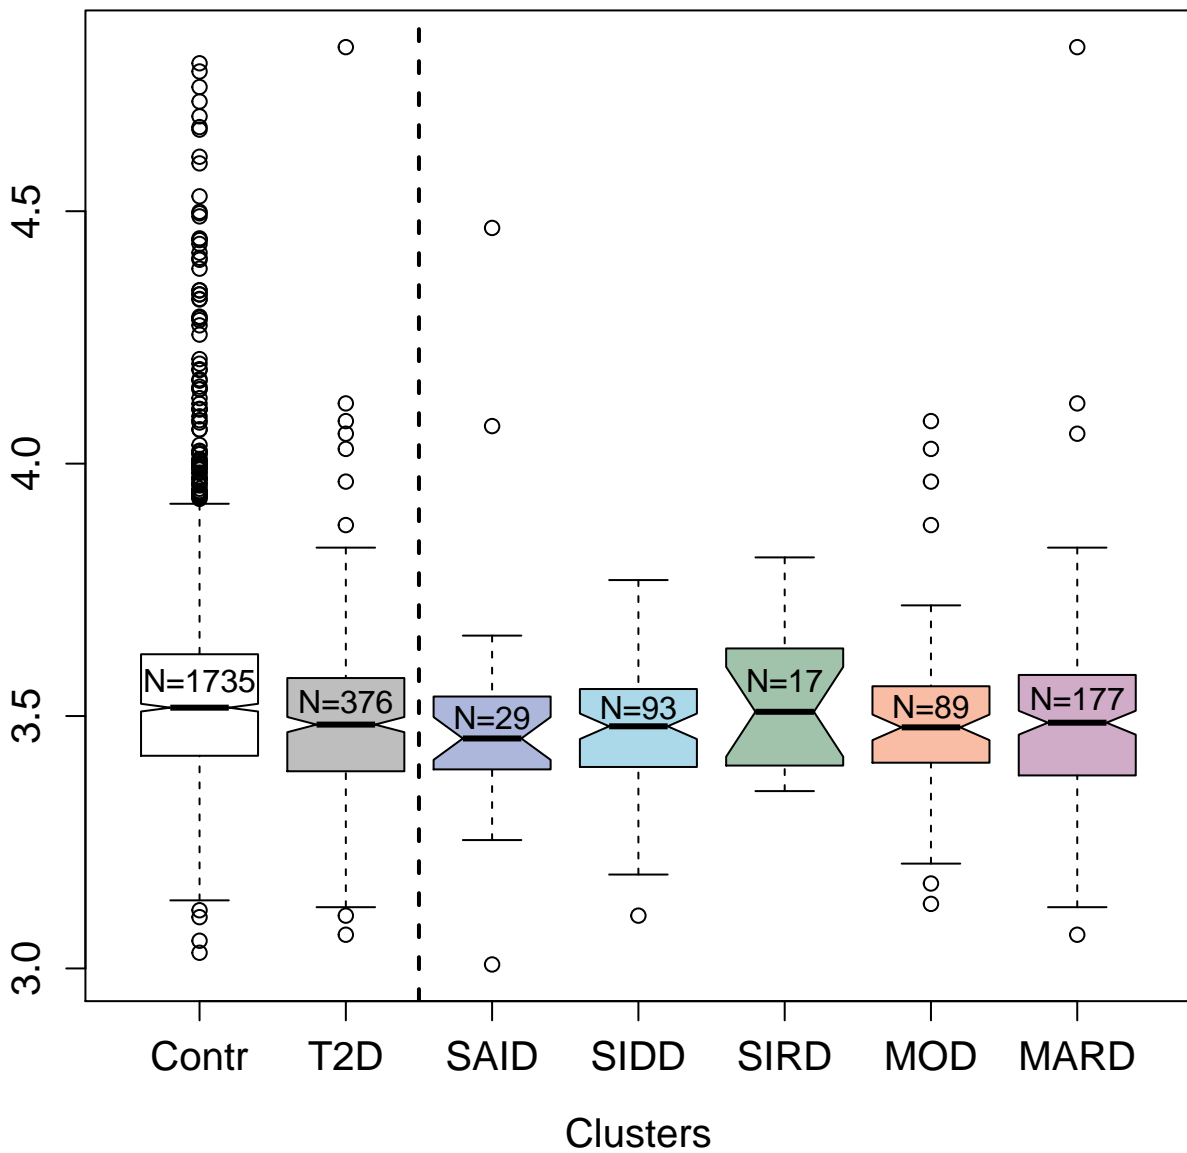



2645-54\_1 : Protein kinase C zeta type

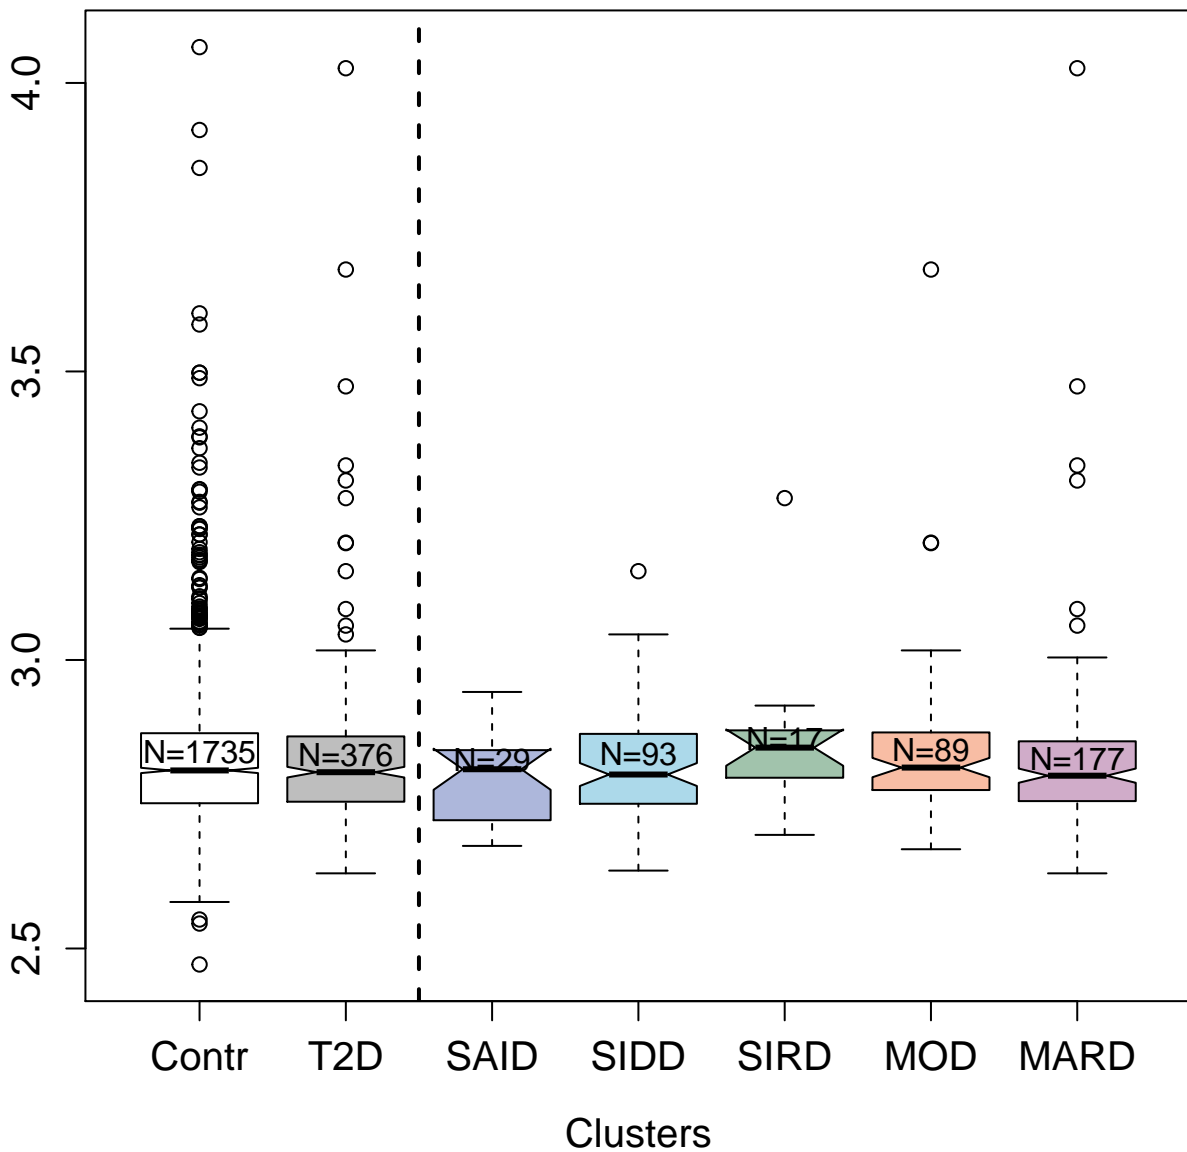

4964-67\_1 : Endoplasmic reticulum aminopeptidase

1

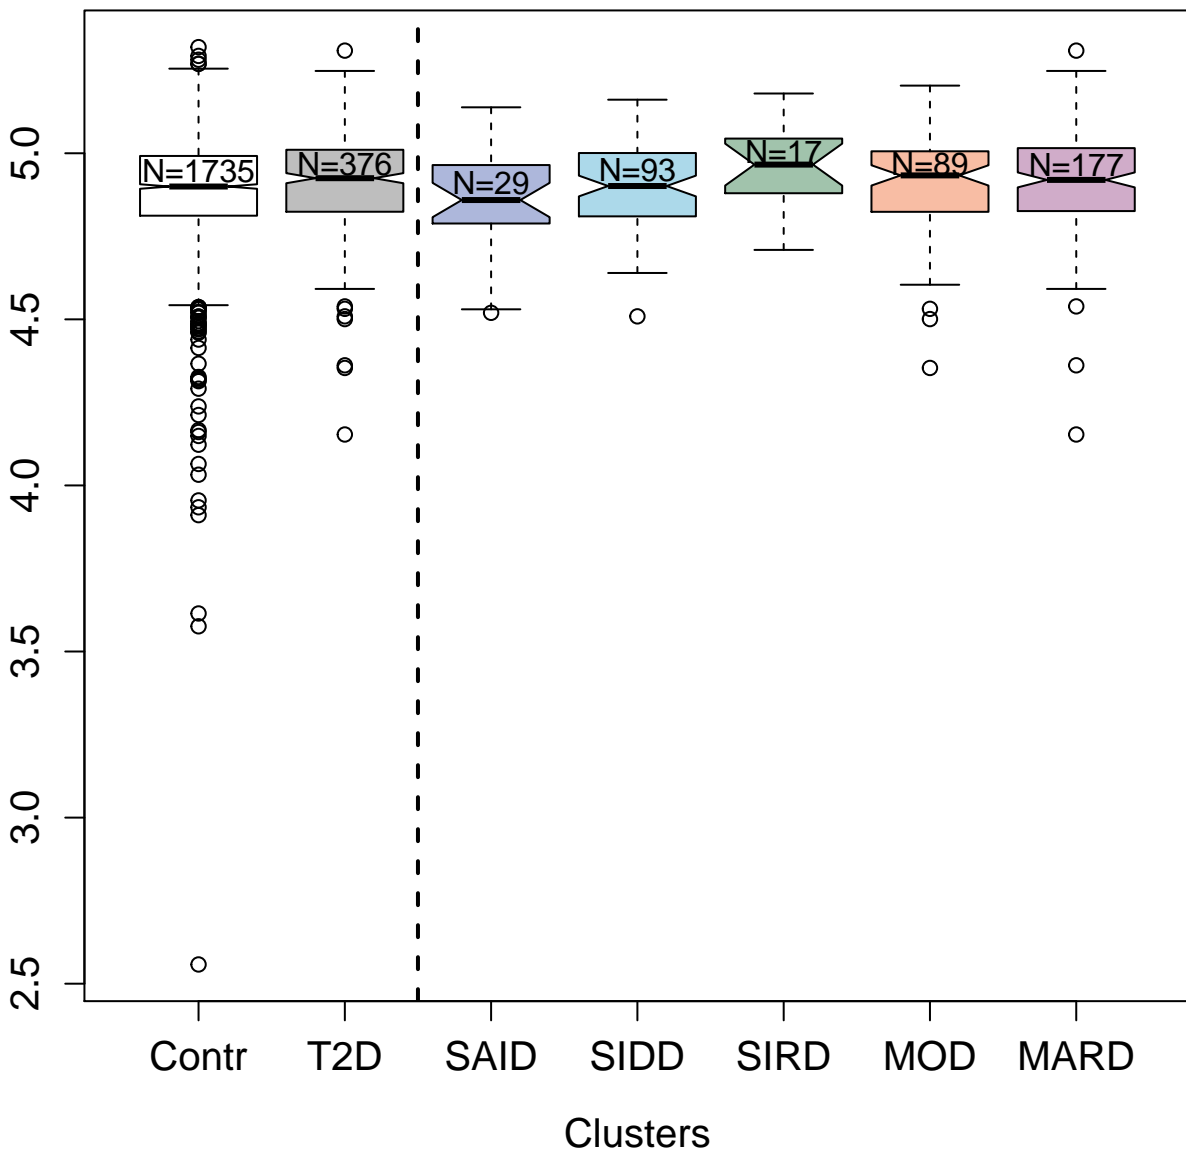

6647-55\_3 : PolyUbiquitin K63-linked

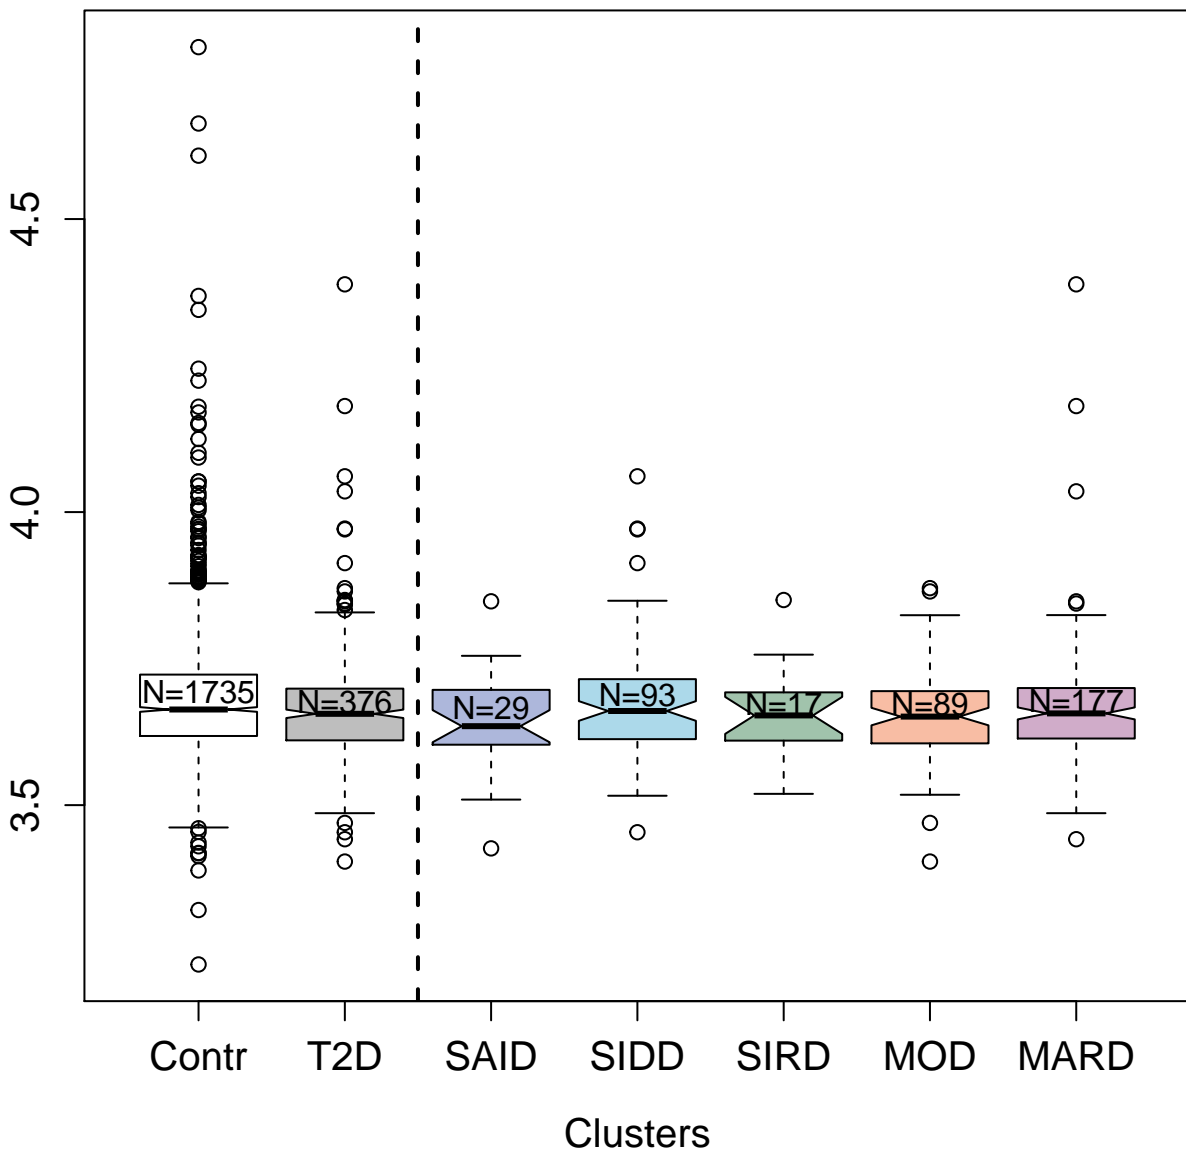

2968-61\_1 : Tumor necrosis factor ligand  
superfamily member 15

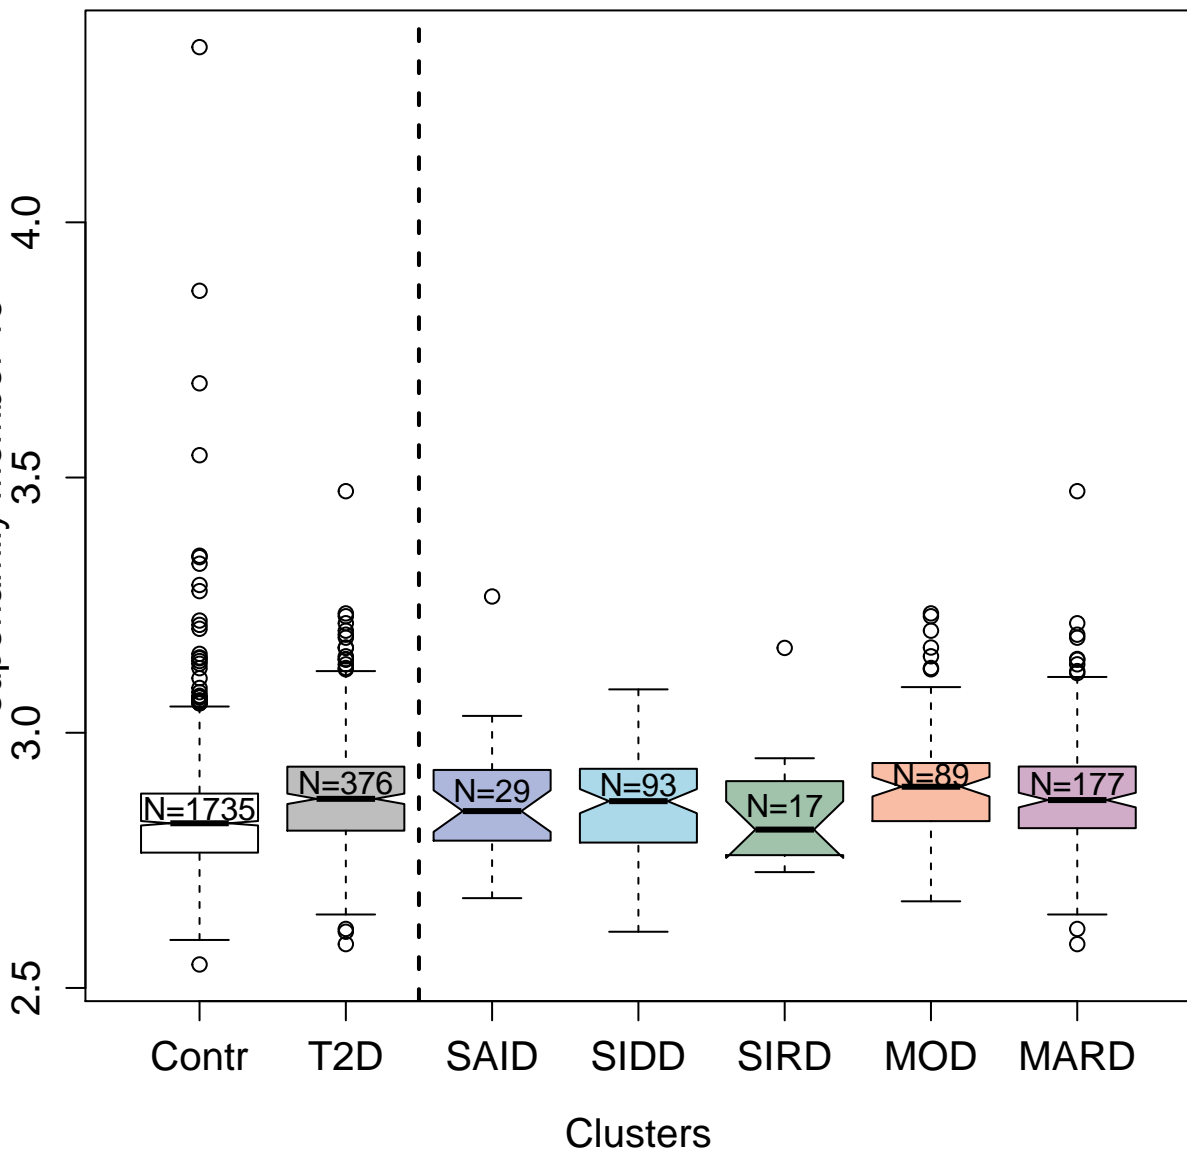

5032-64\_1 : FACT complex subunit SSRP1

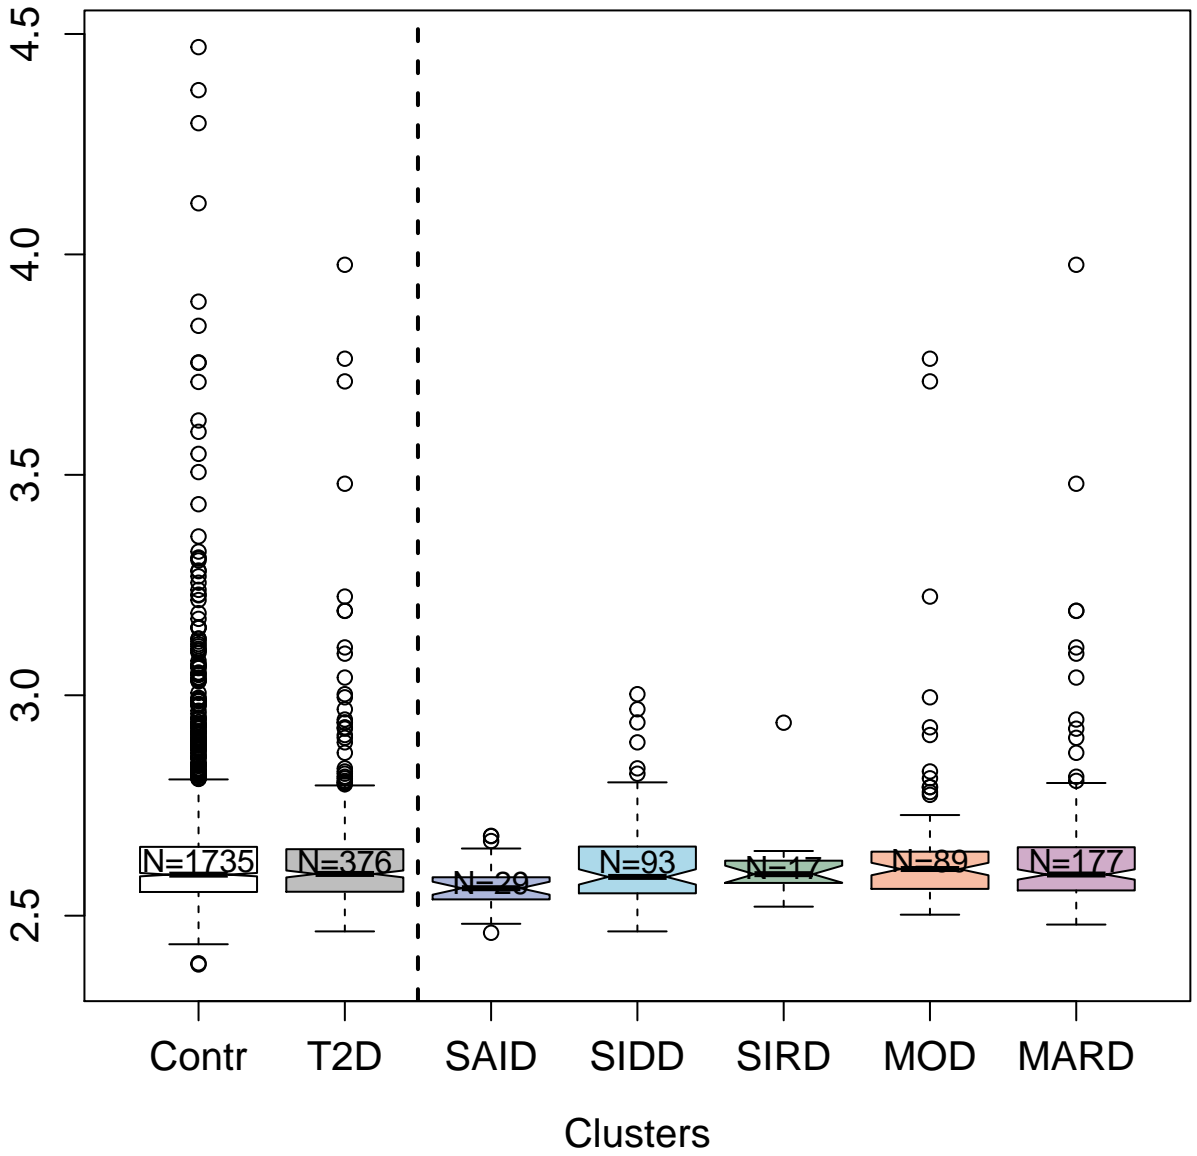

3195-50\_2 : Granulysin

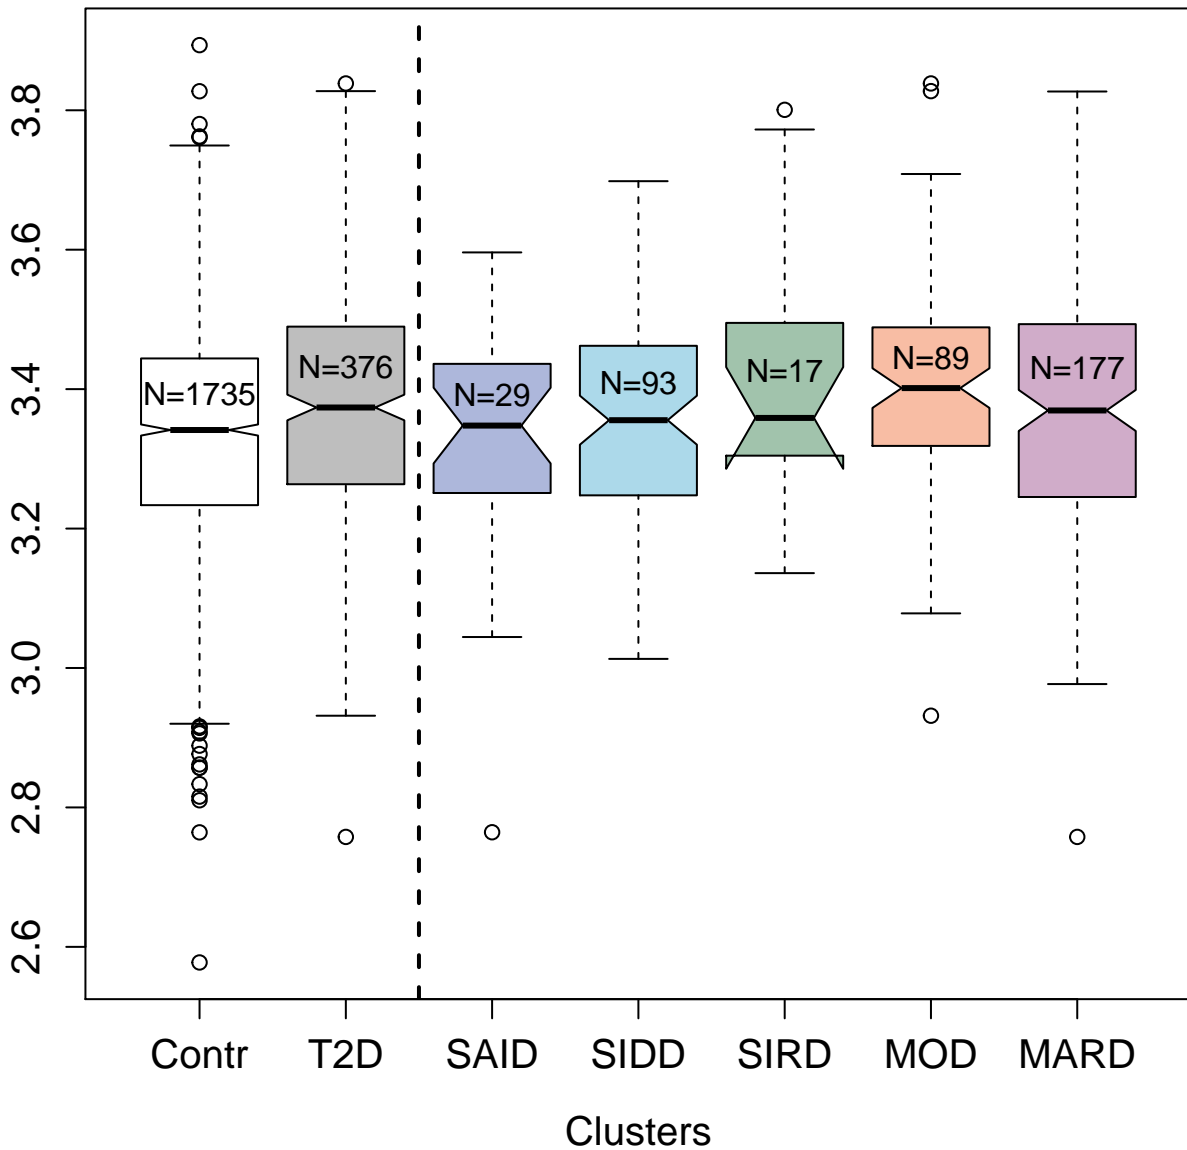

4908-6\_1 : Endoglin

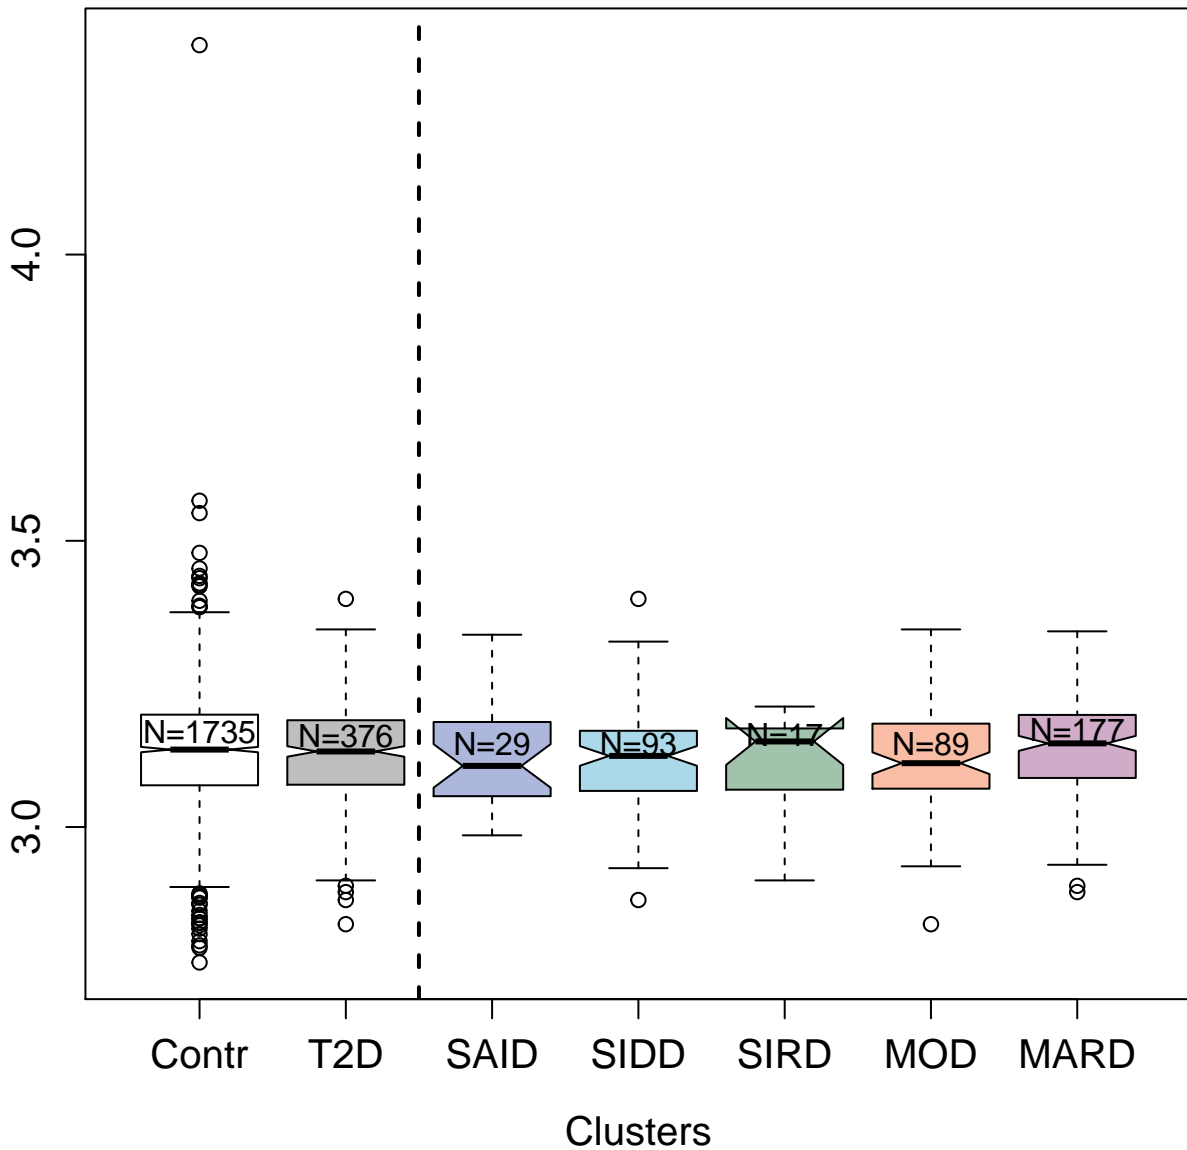

2212-69\_1 : Tissue-type plasminogen activator

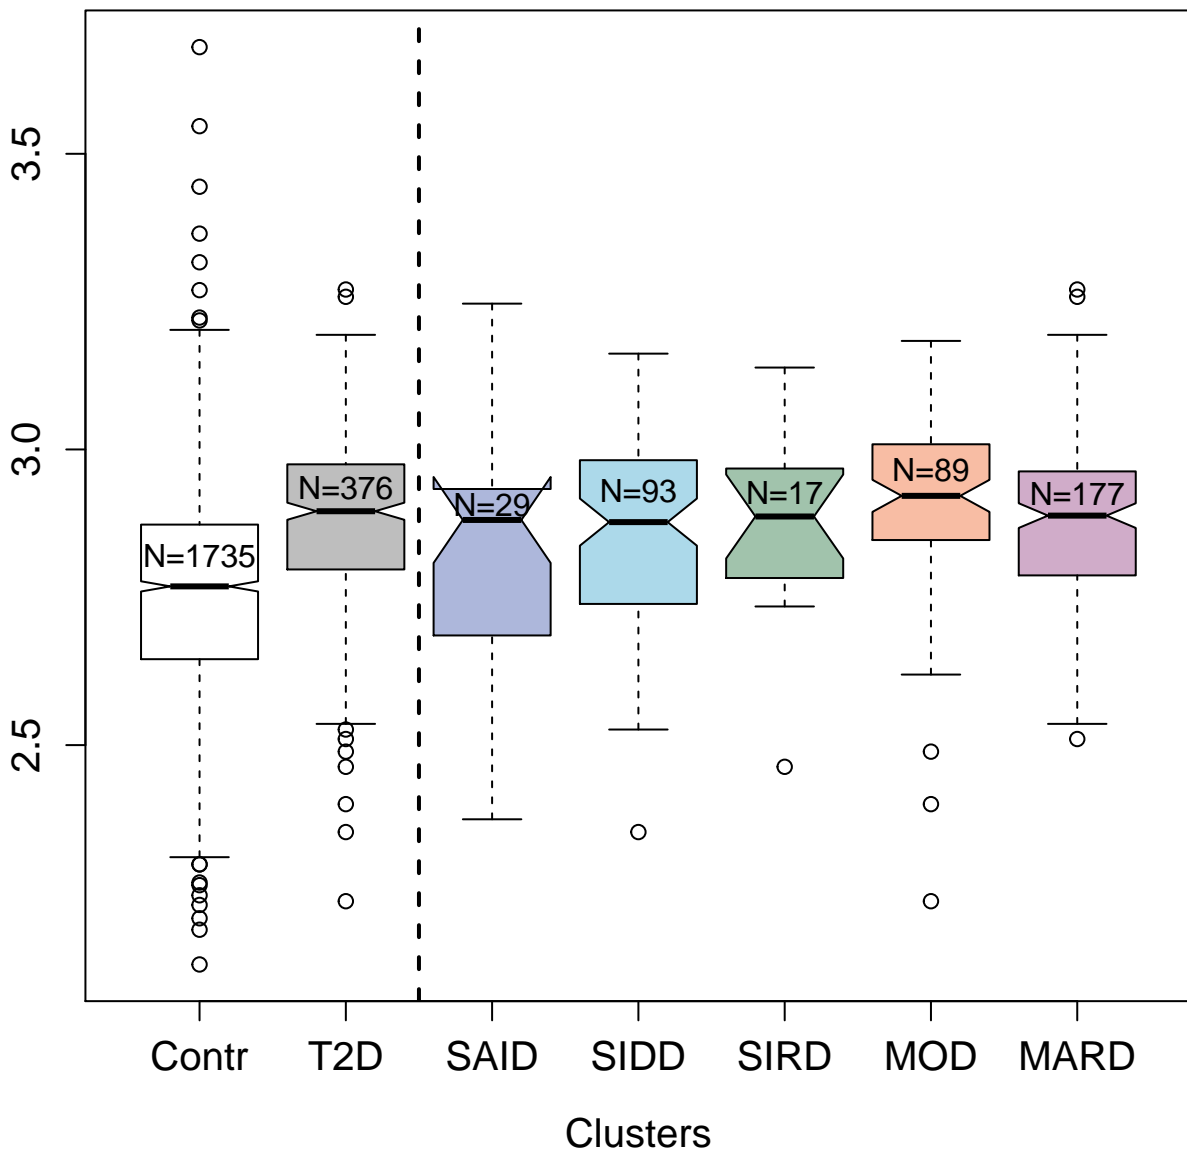



2785-15\_2 : C-C motif chemokine 8

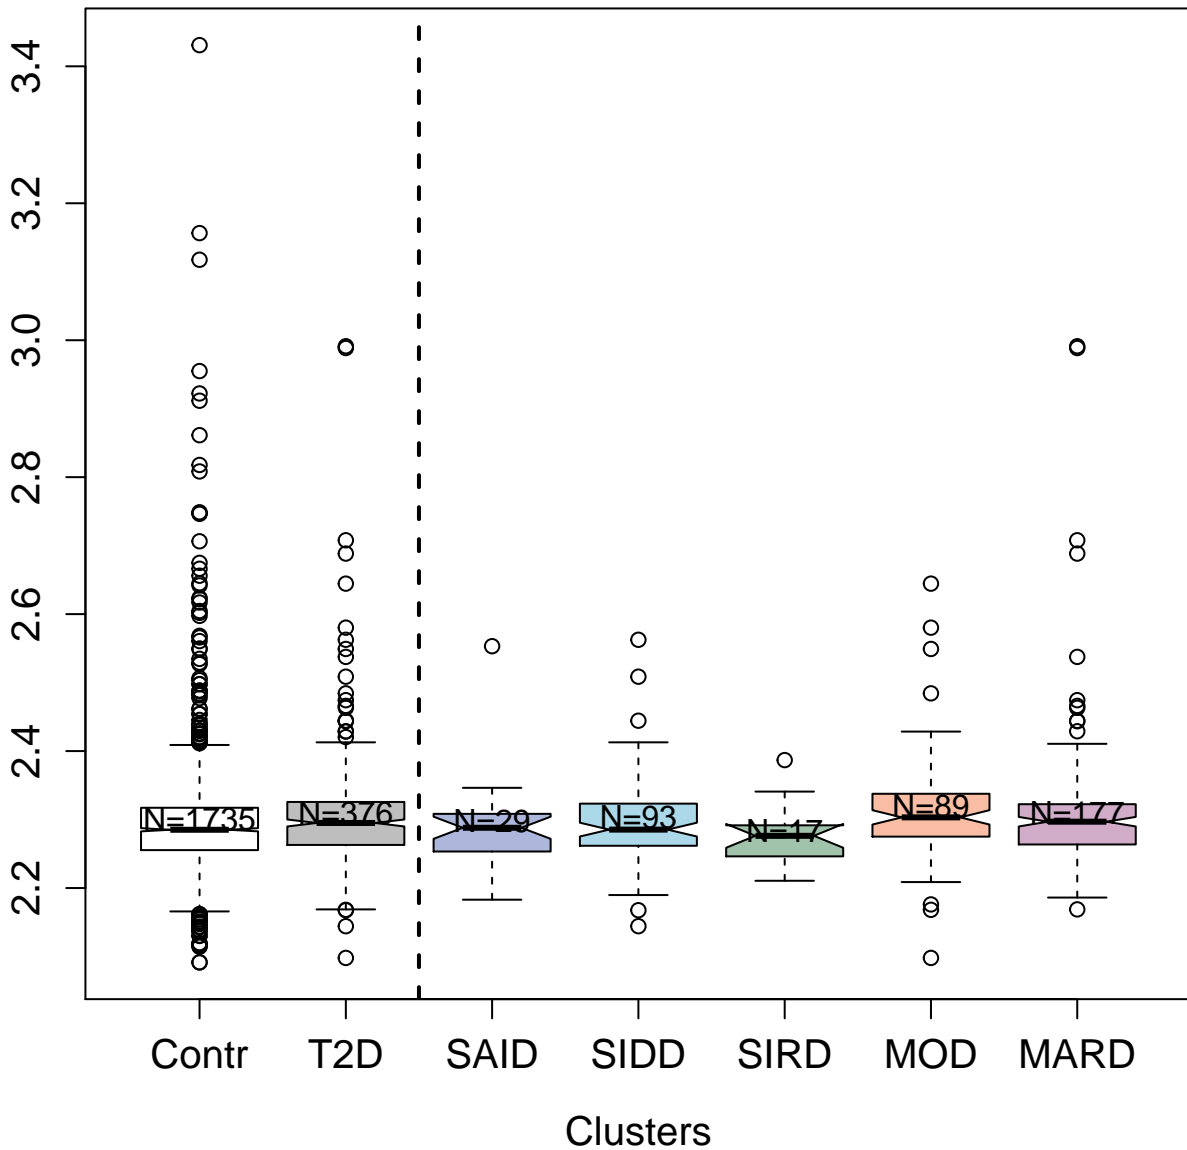

2773-50\_2 : Interleukin-10

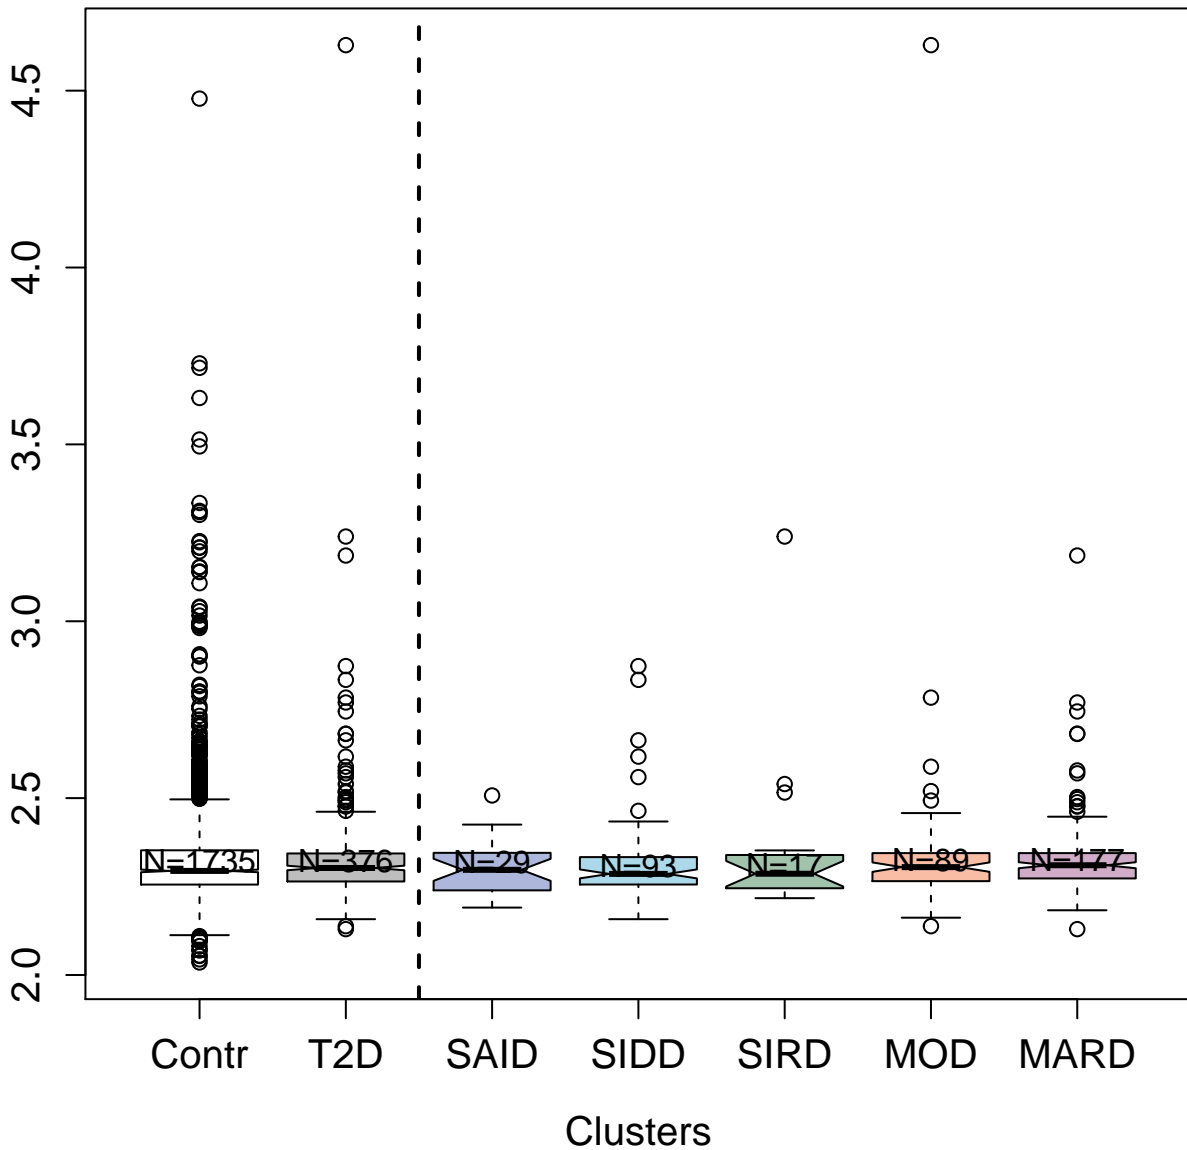

3323-37\_1 : Low-density lipoprotein receptor-related protein 8

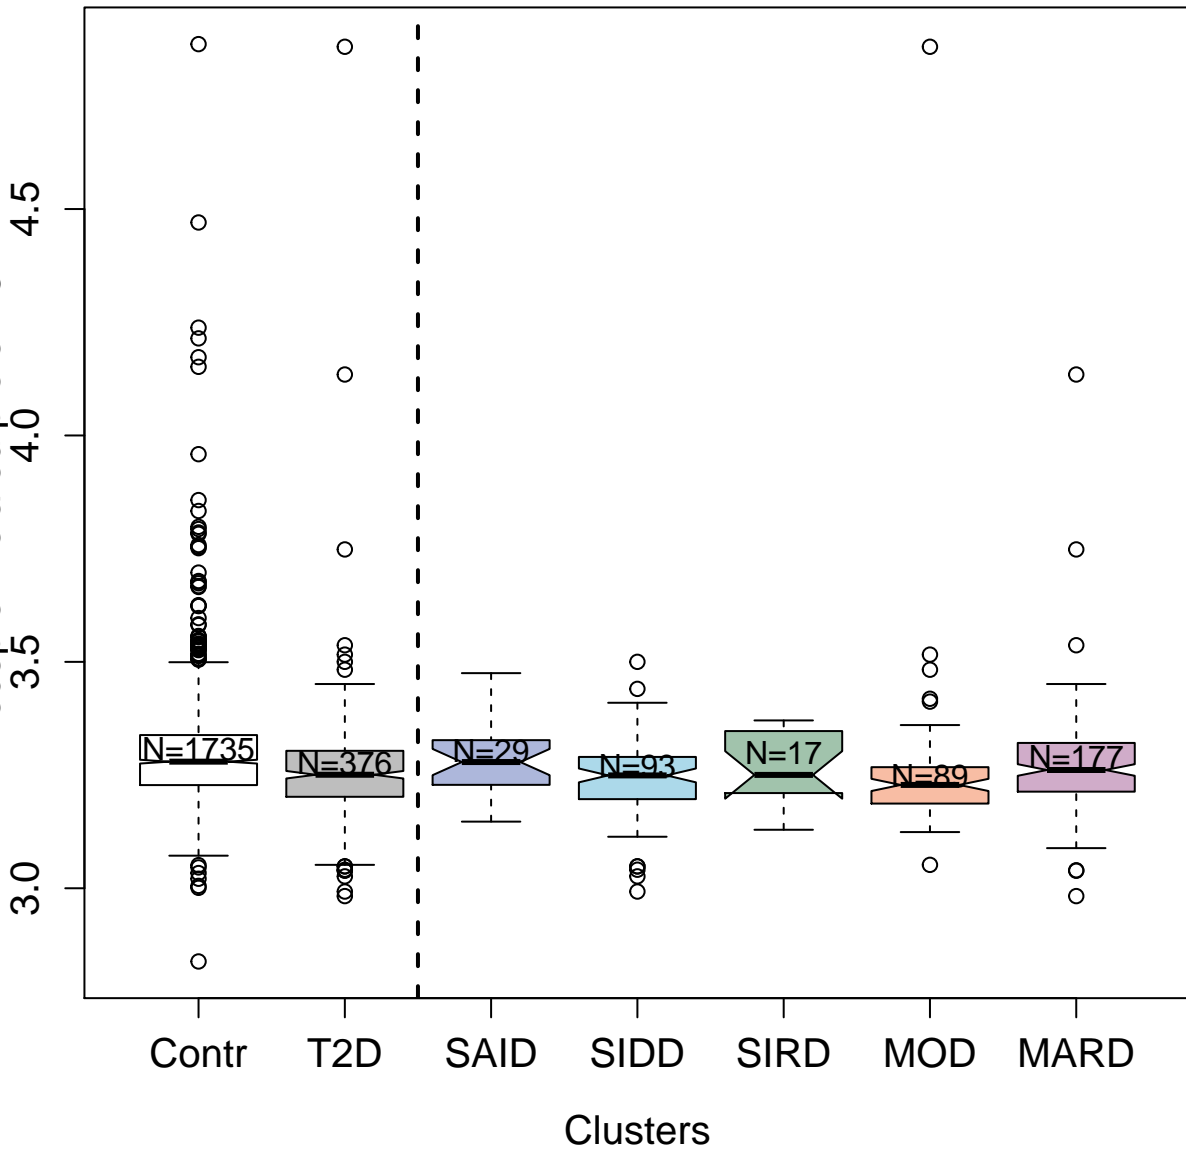

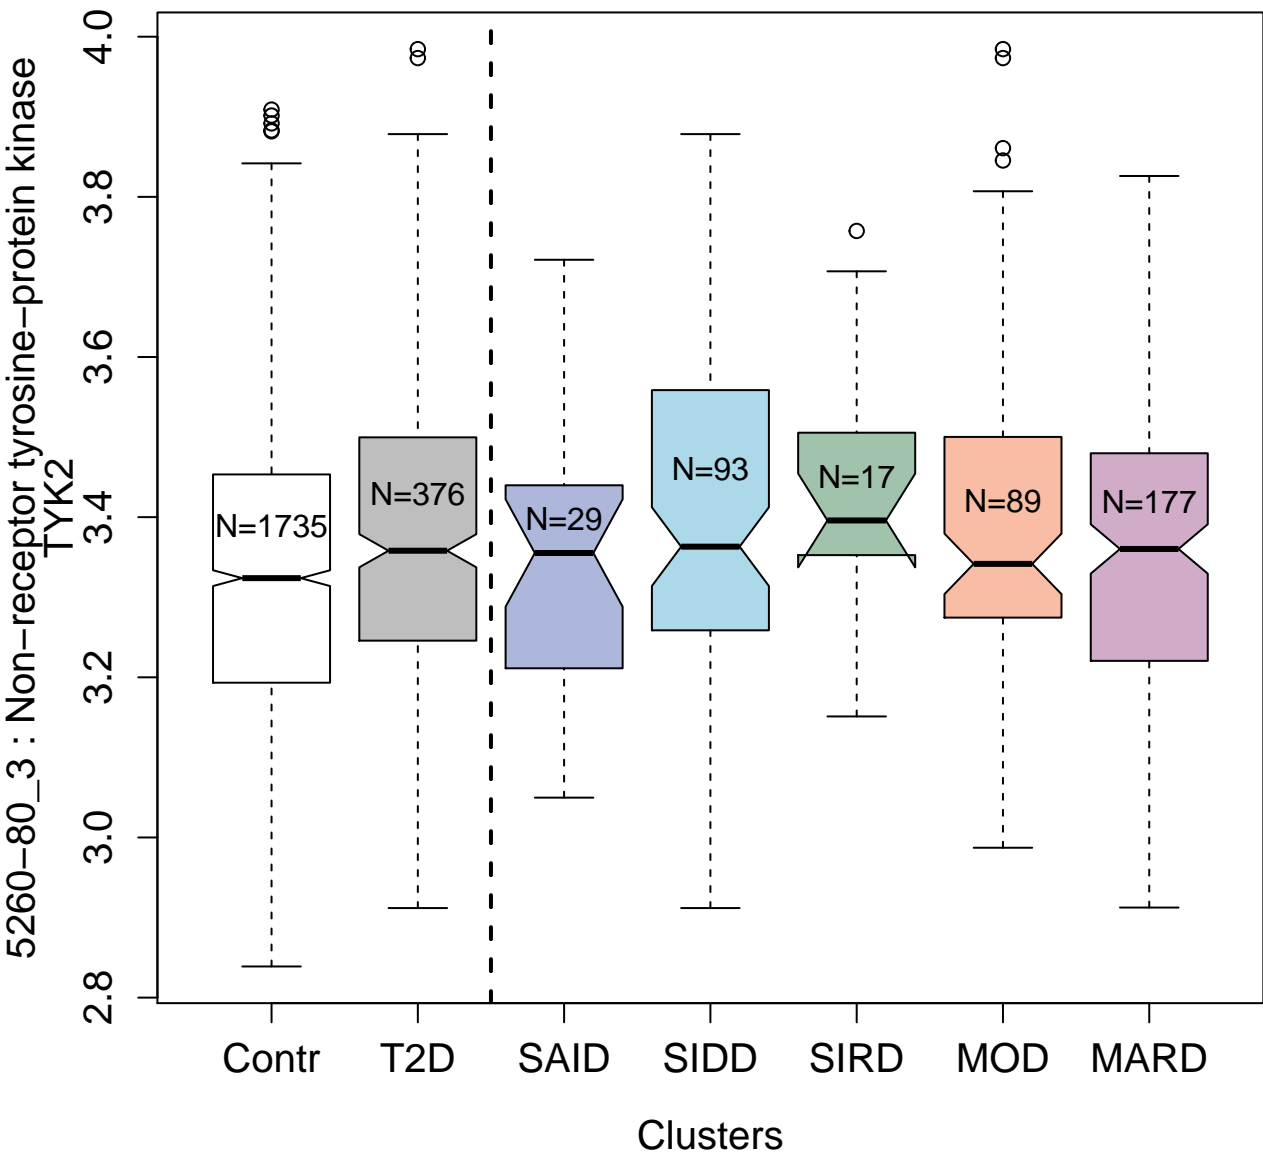

5363-51\_3 : Semaphorin-3E

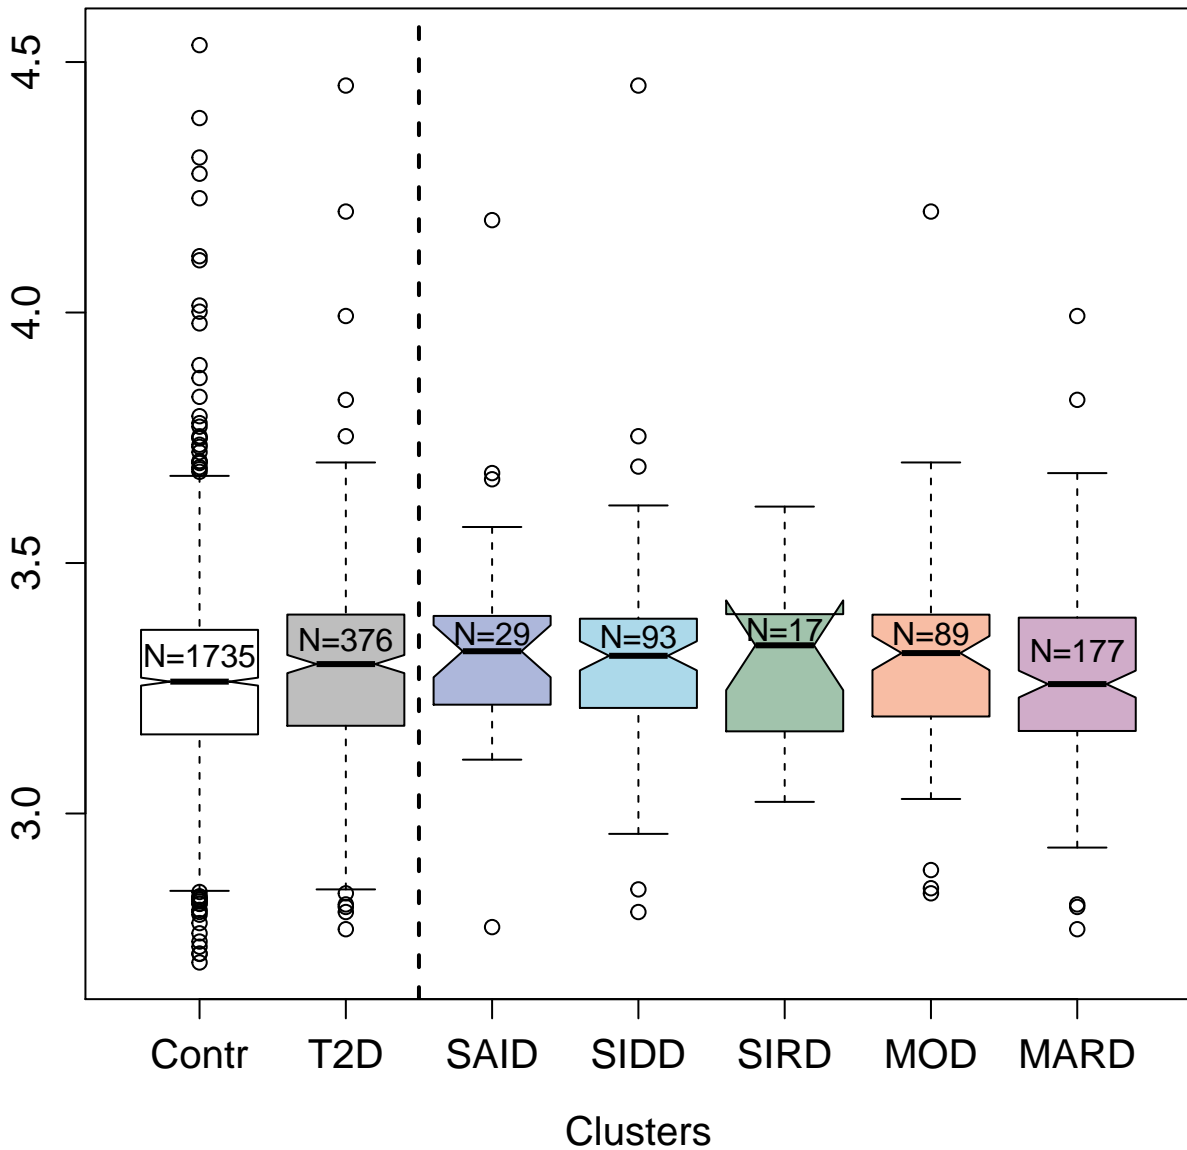

3803-10\_2 : Cystatin-D

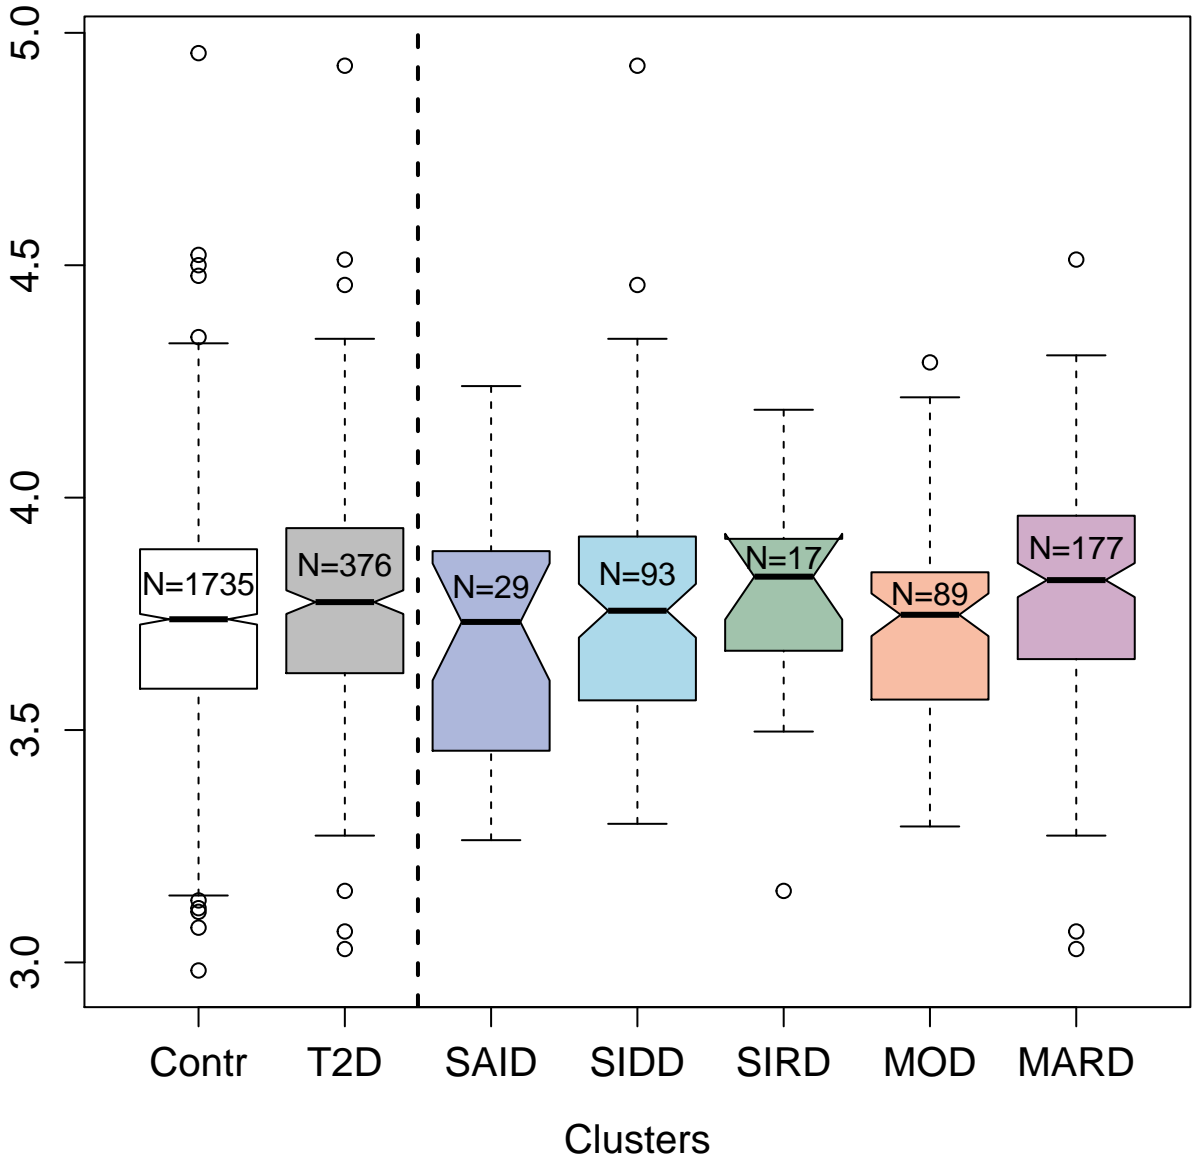

3605-77\_4 : Mannan-binding lectin serine protease

1

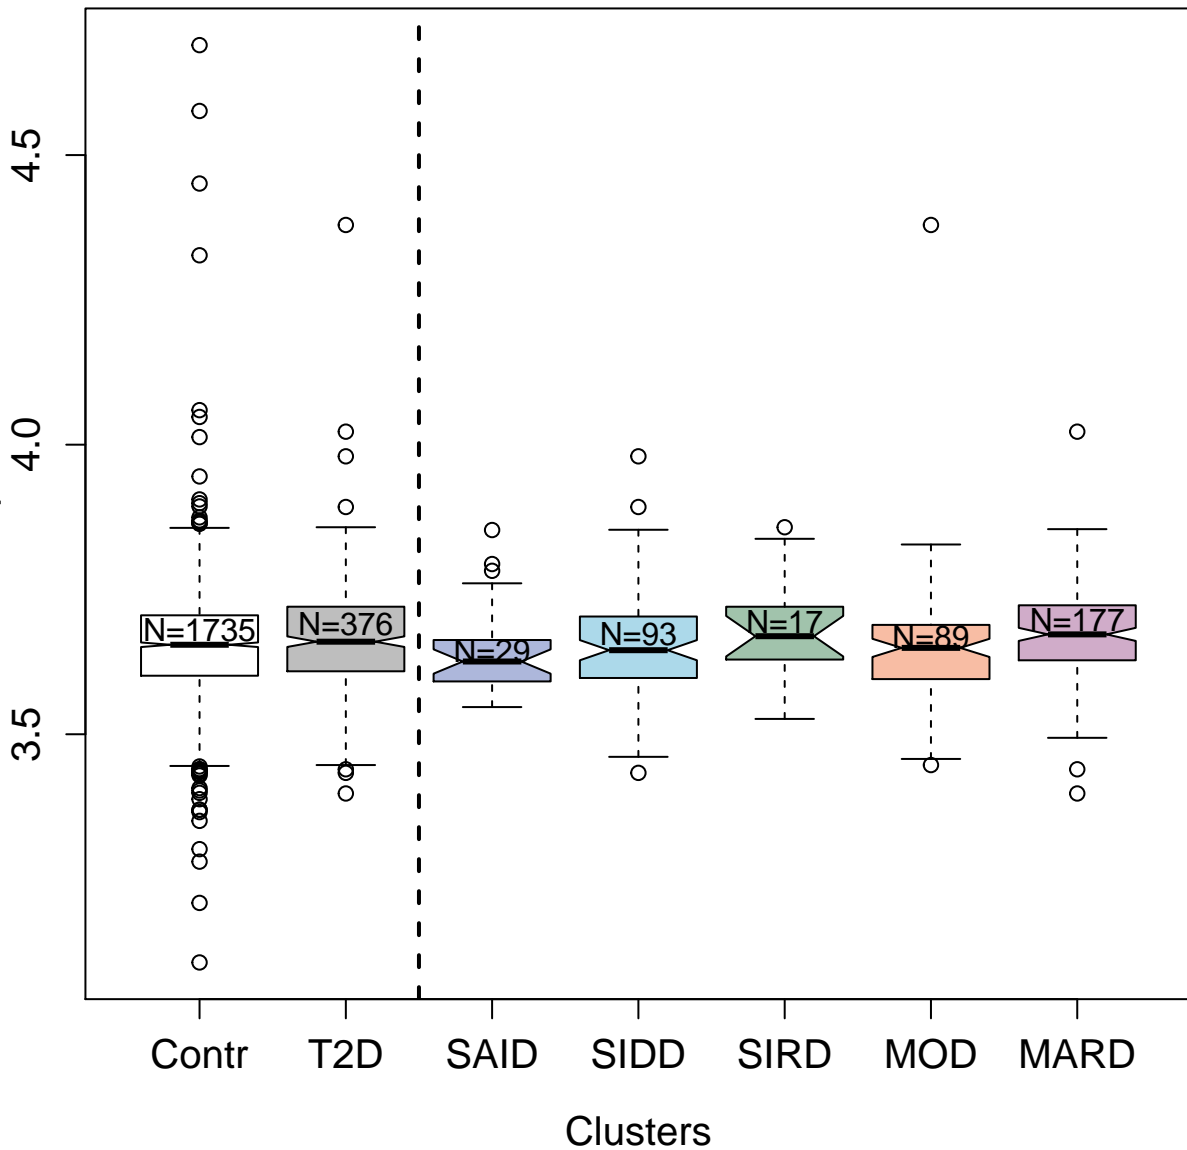

5897-58\_3 : Gastrin-releasing peptide

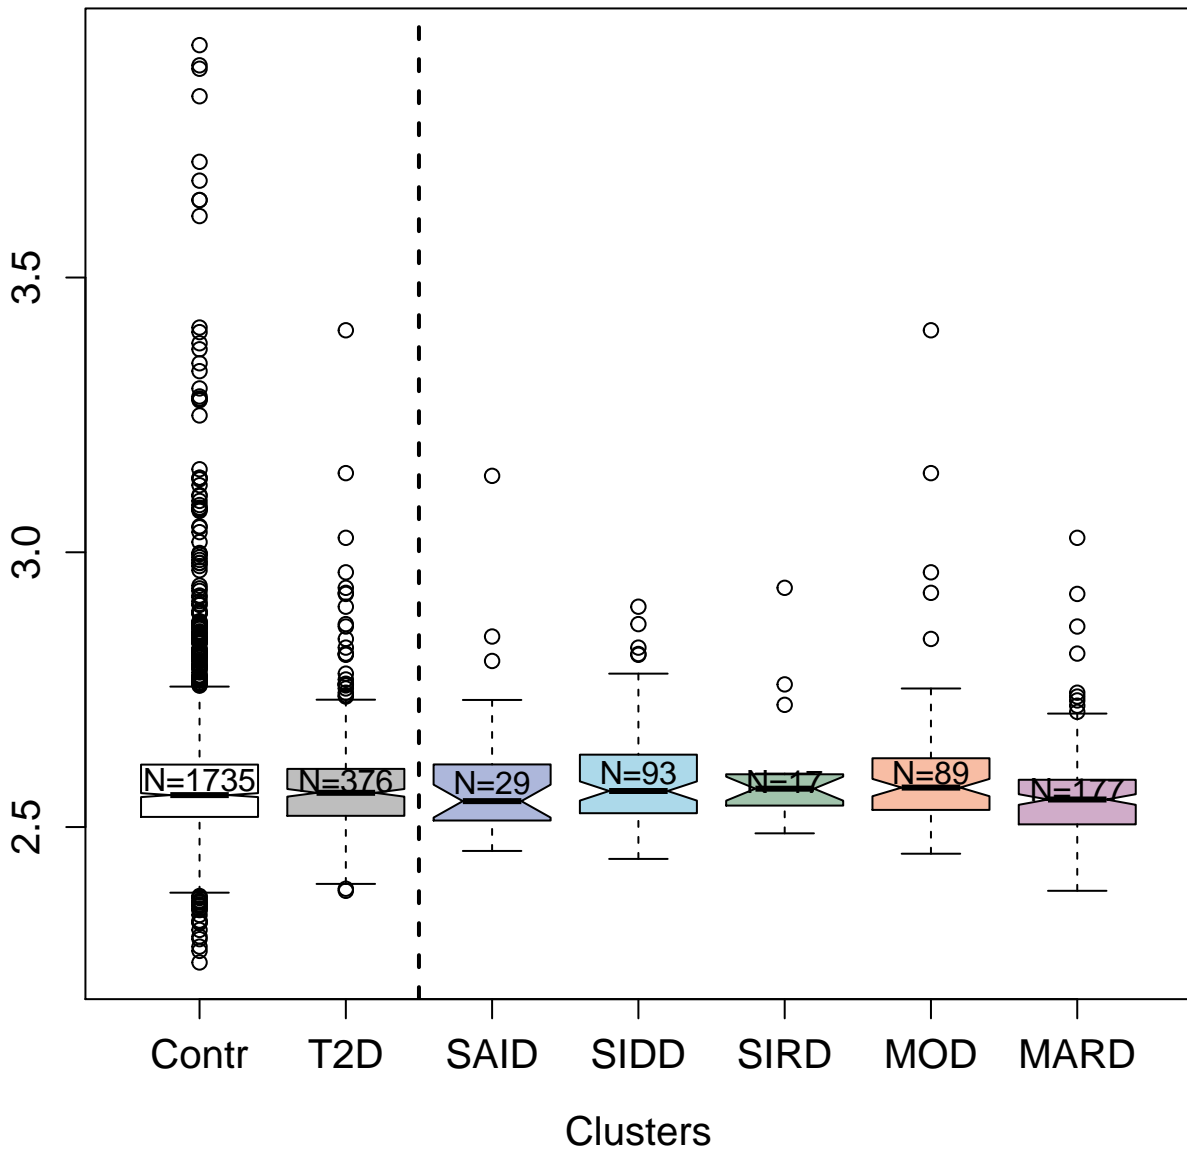



2827-23\_2 : Fractalkine

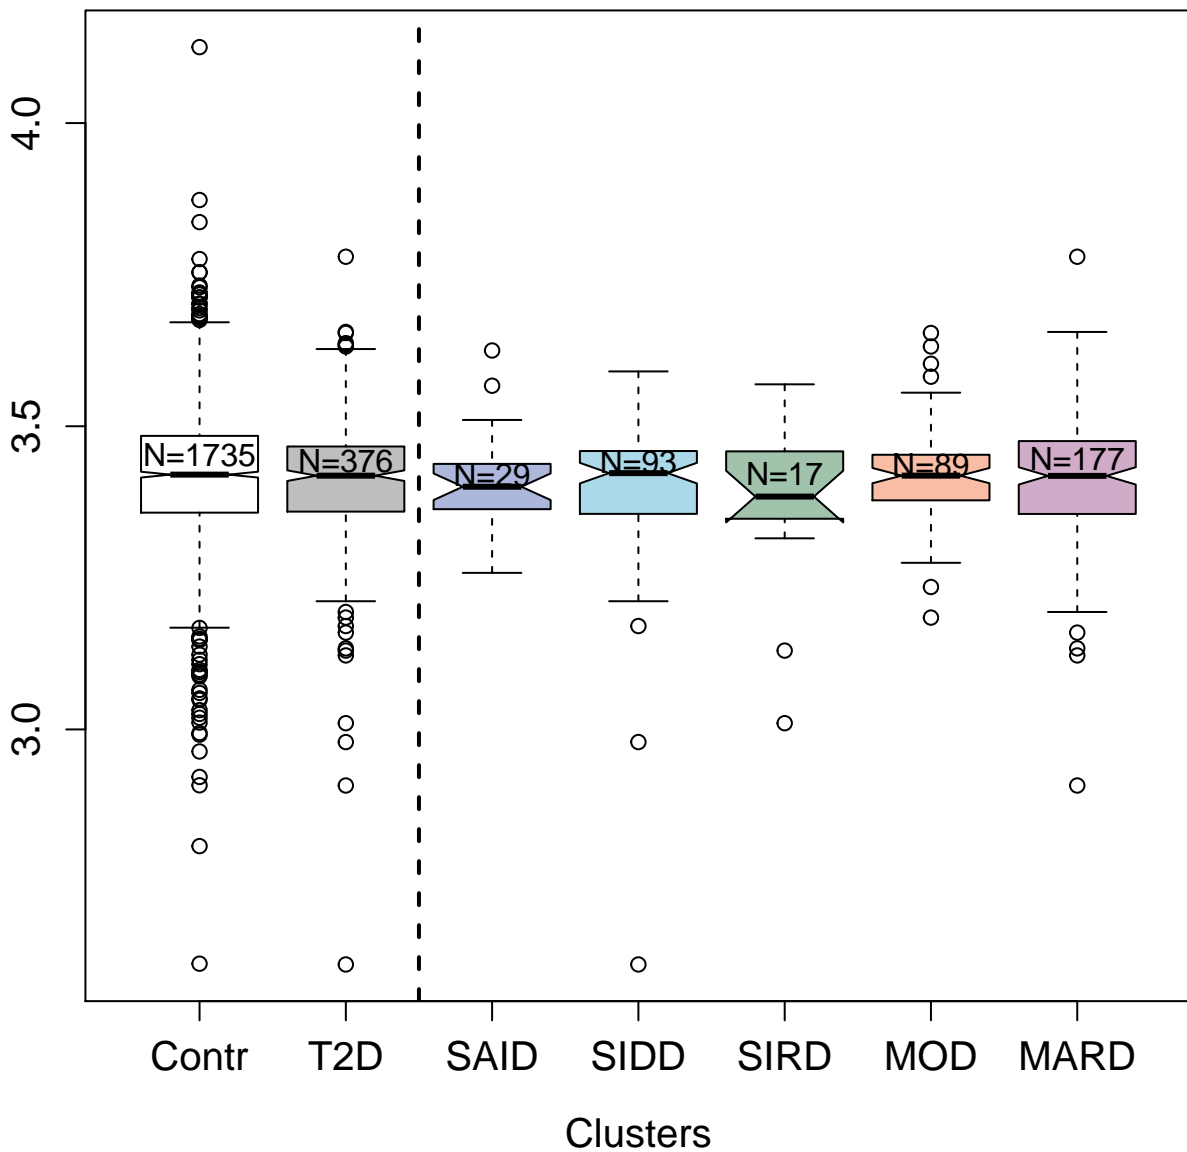

5095-21\_3 : Killer cell immunoglobulin-like  
receptor 2DL4

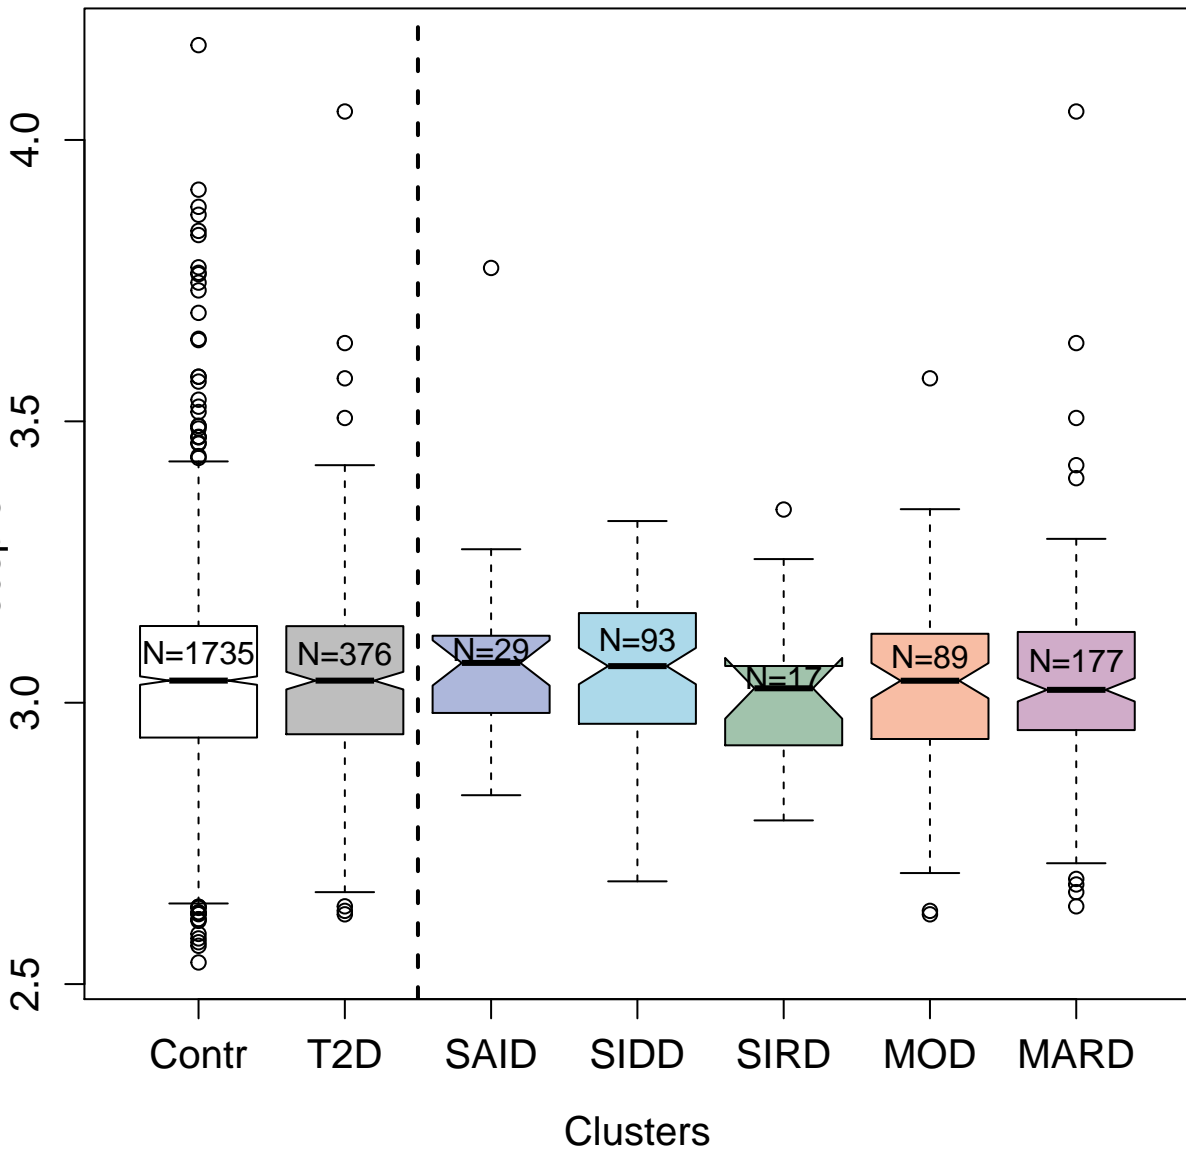

3359-11\_2 : Cyclin-dependent kinase 8:Cyclin-C

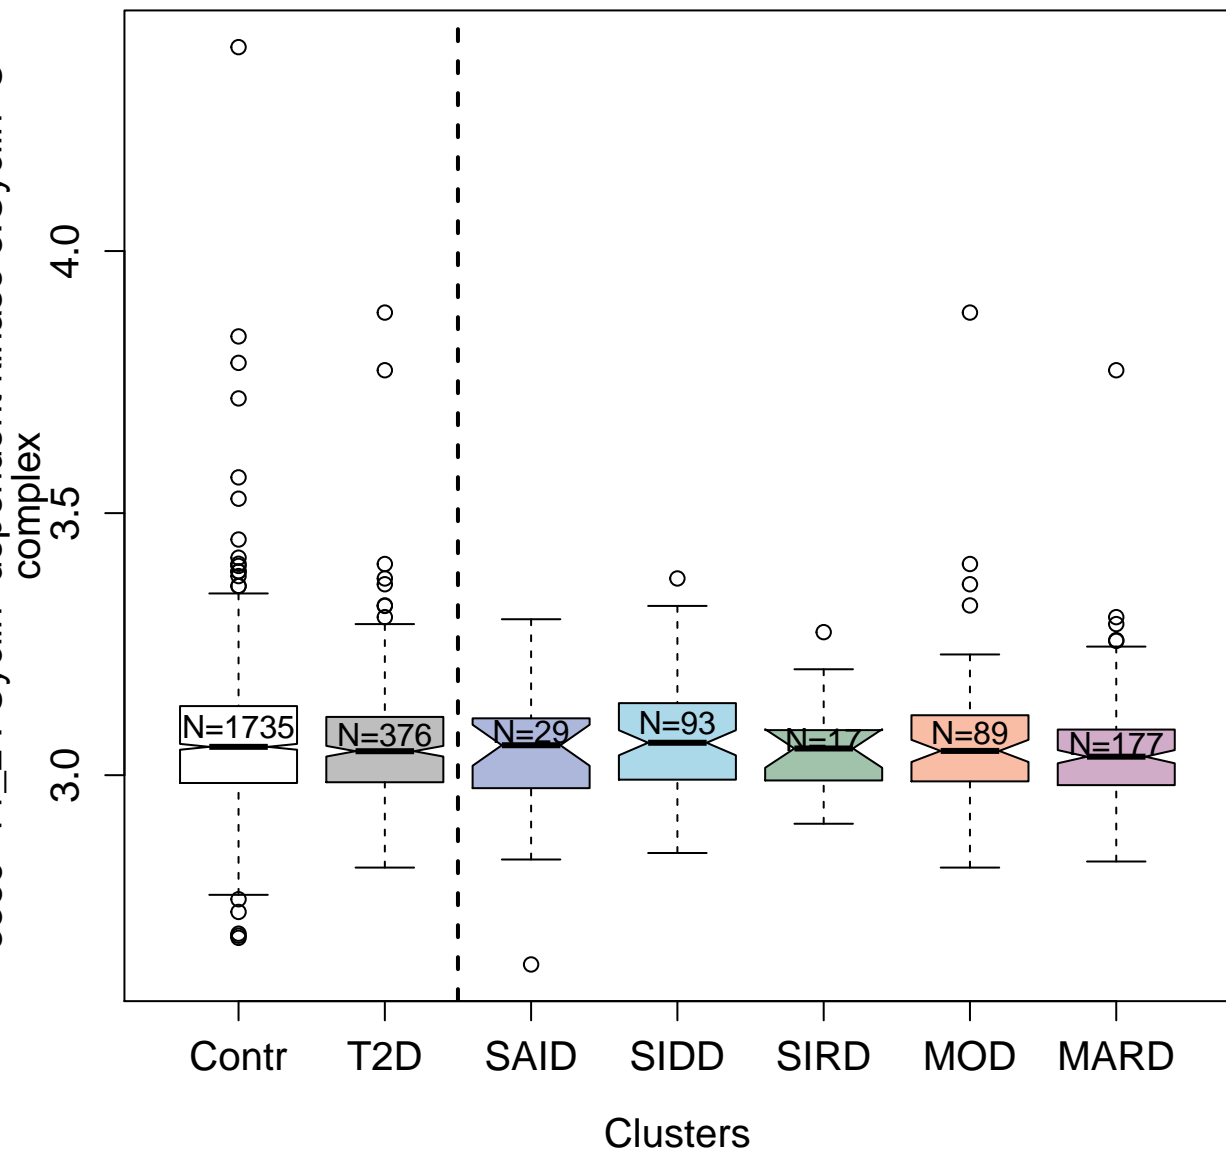

3315-15\_1 : Glypican-2

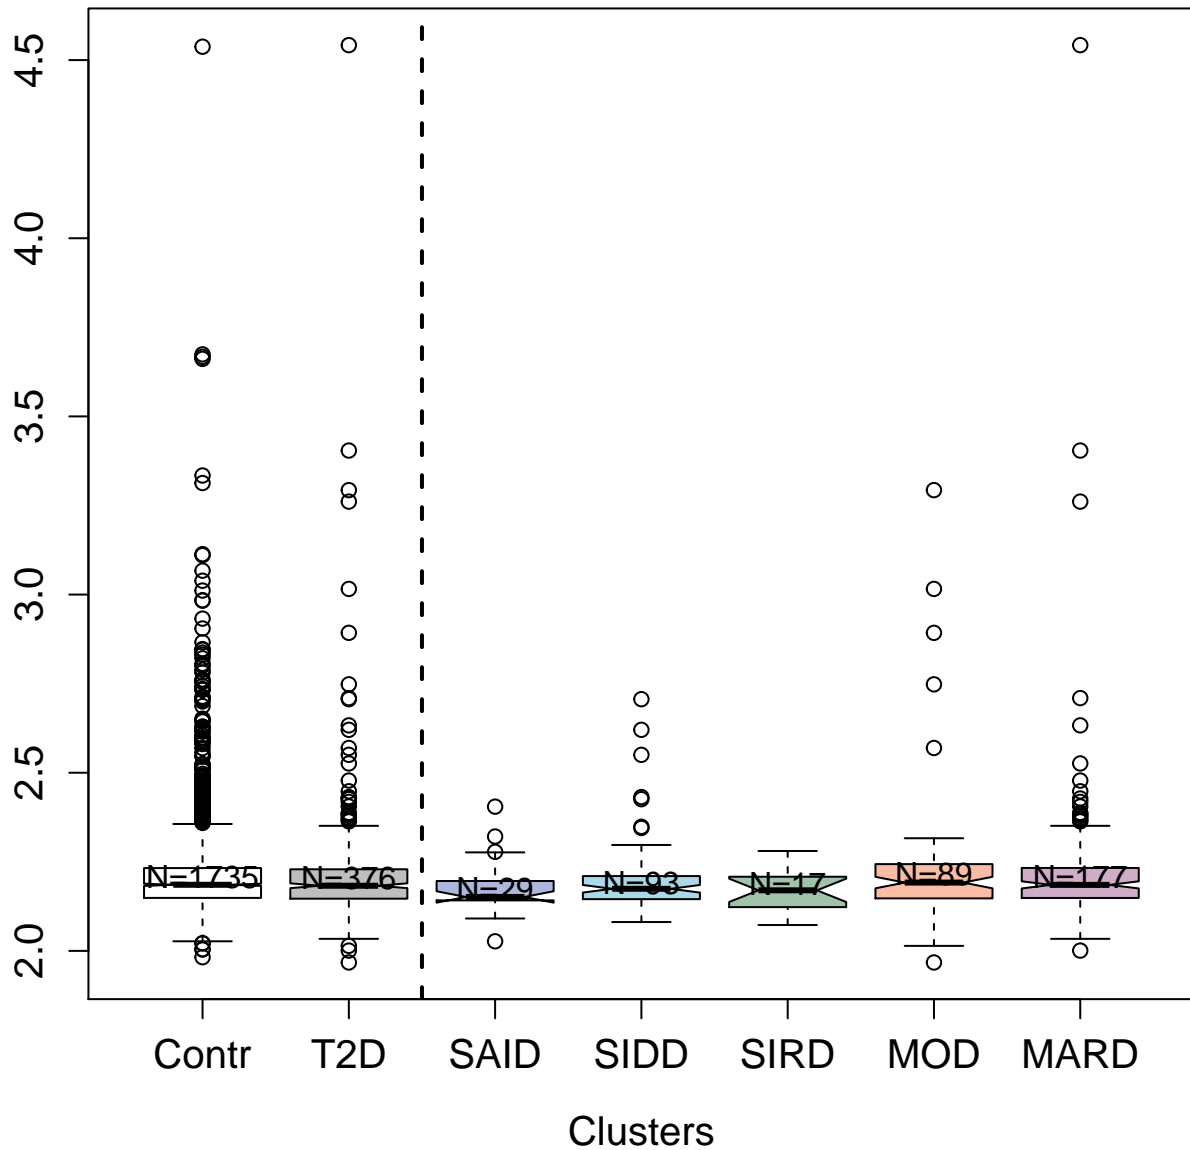

3420-21\_2 : Carbonic anhydrase 13

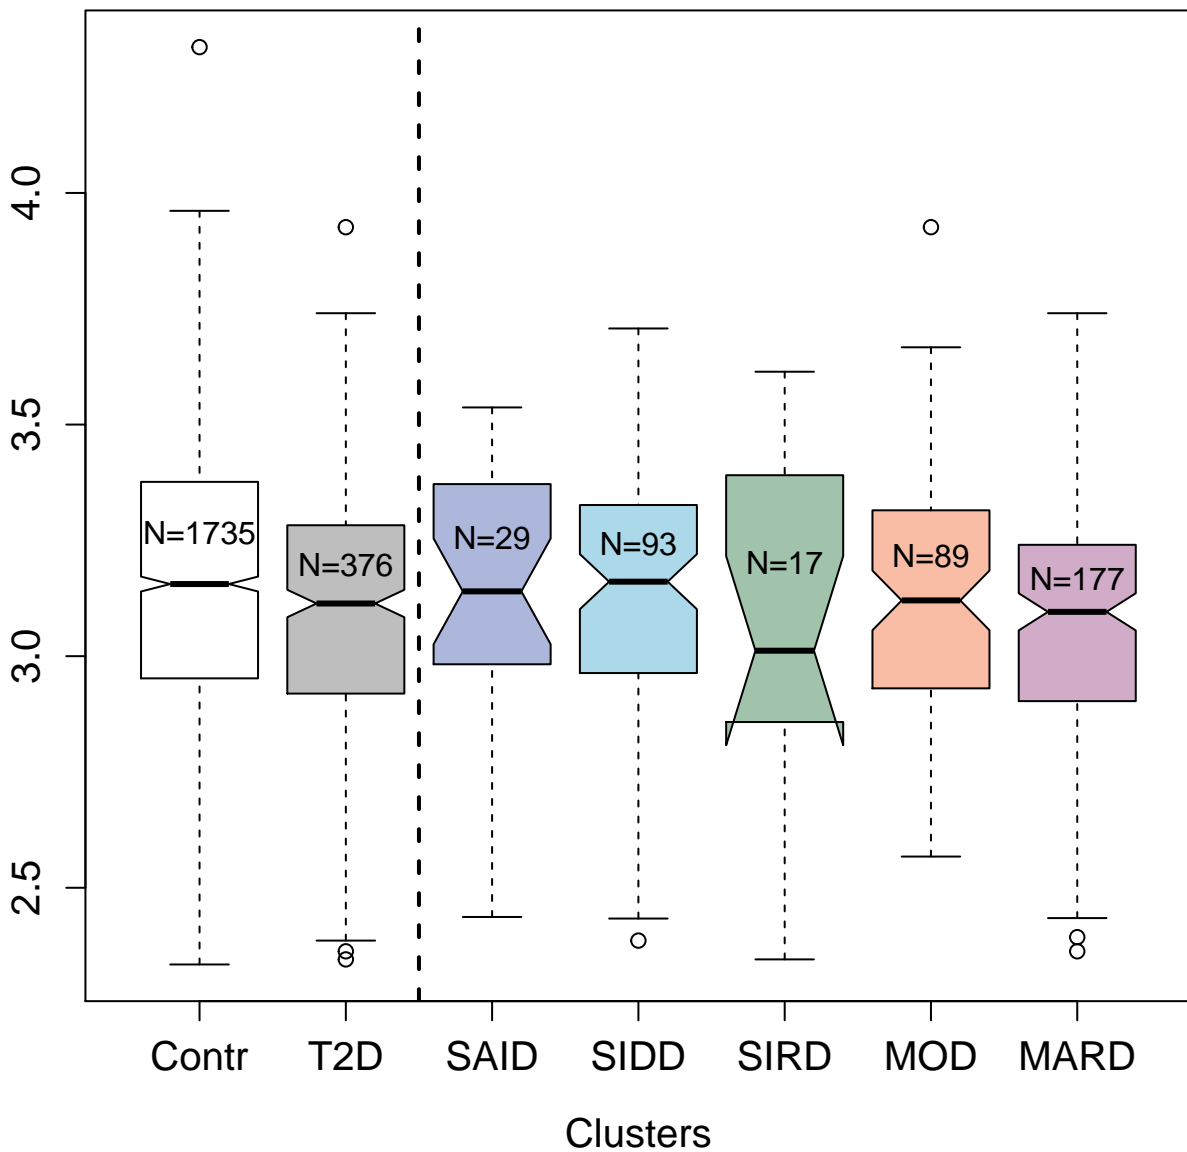

5400-52\_3 : Leptin receptor

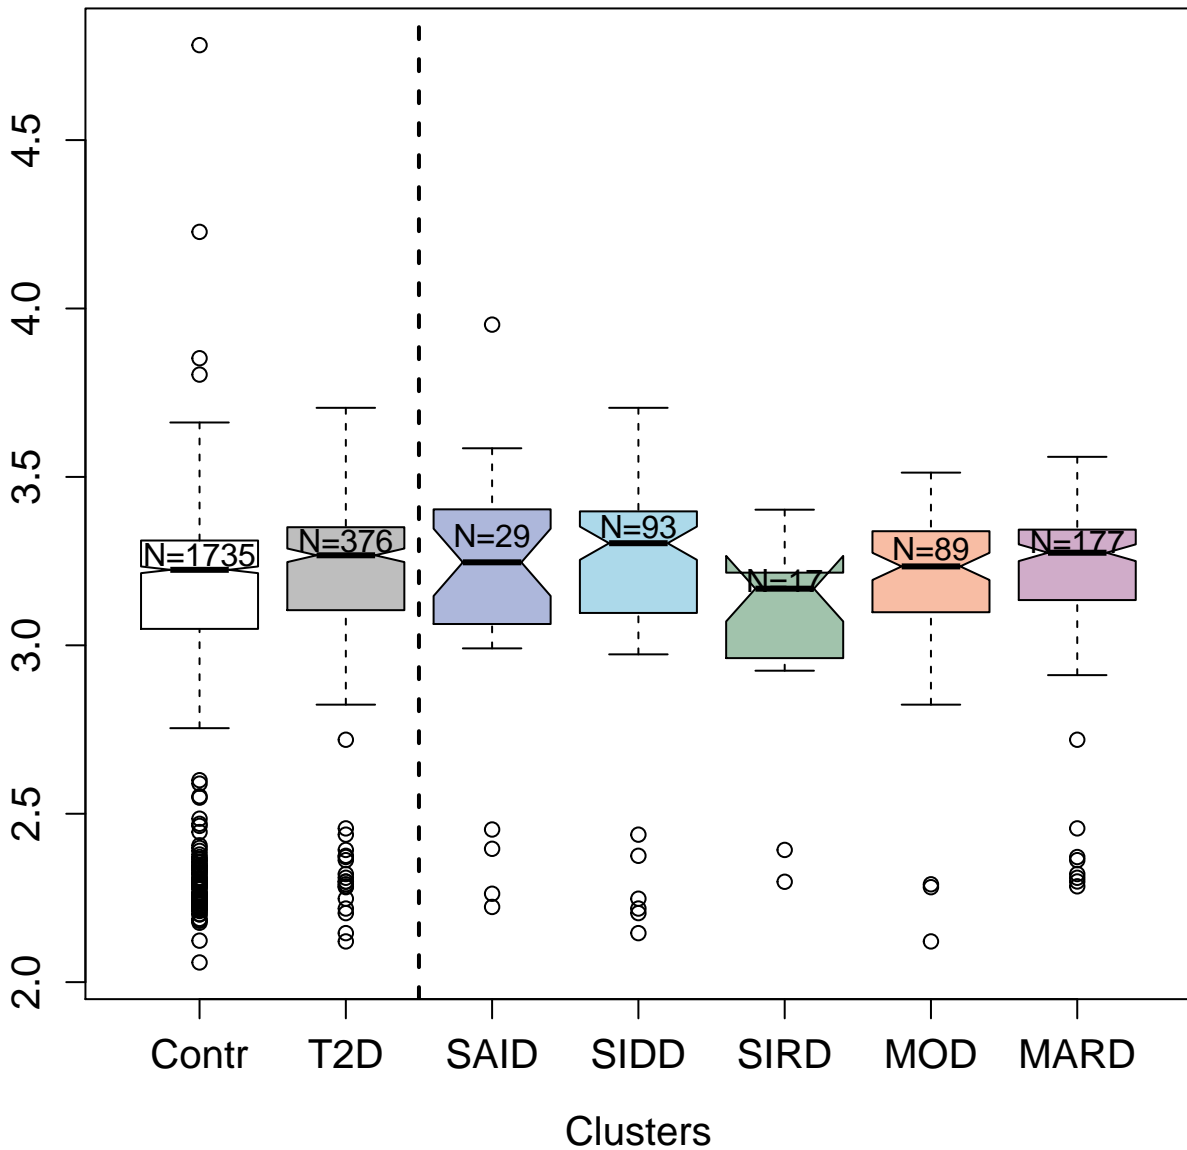

14129-1\_3 : Interferon alpha-7

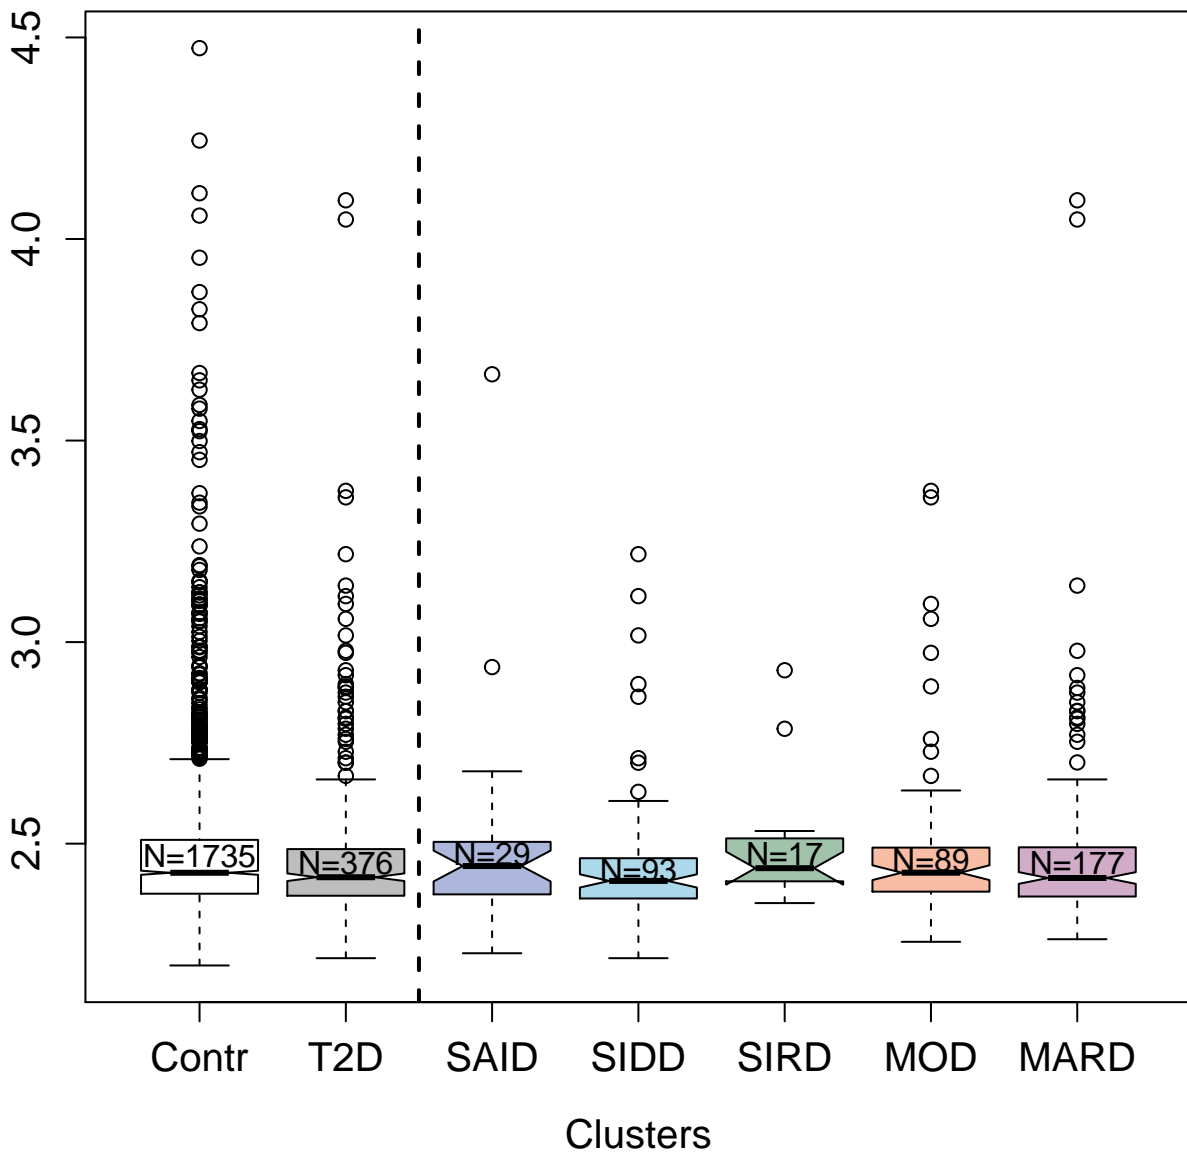

4162-54\_2 : Serotransferrin

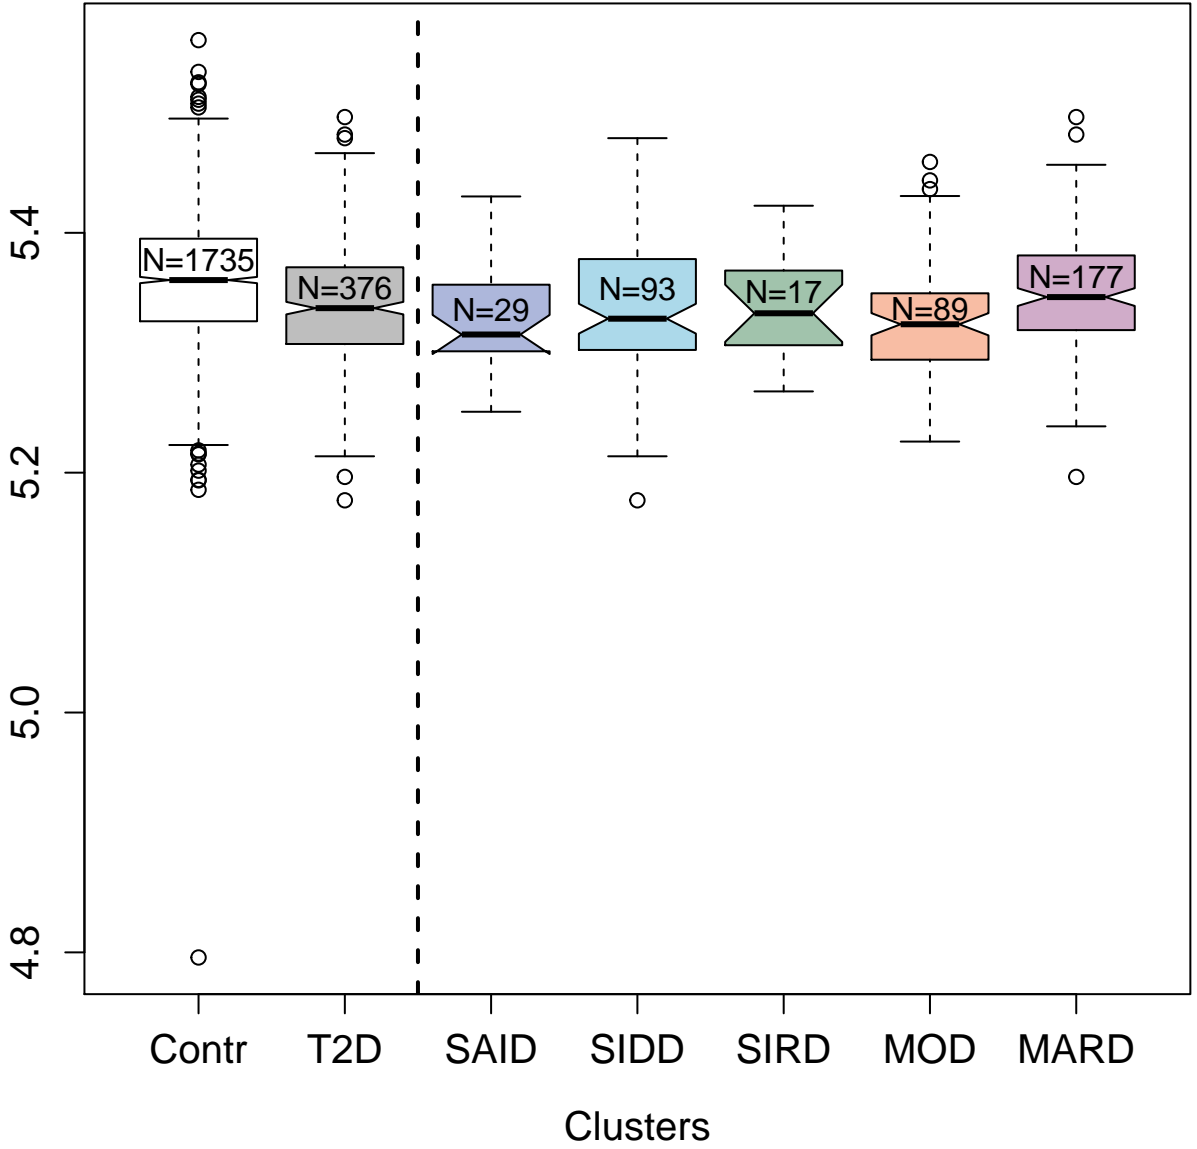



14122-132\_3 : E3 ubiquitin-protein ligase ZNRF3

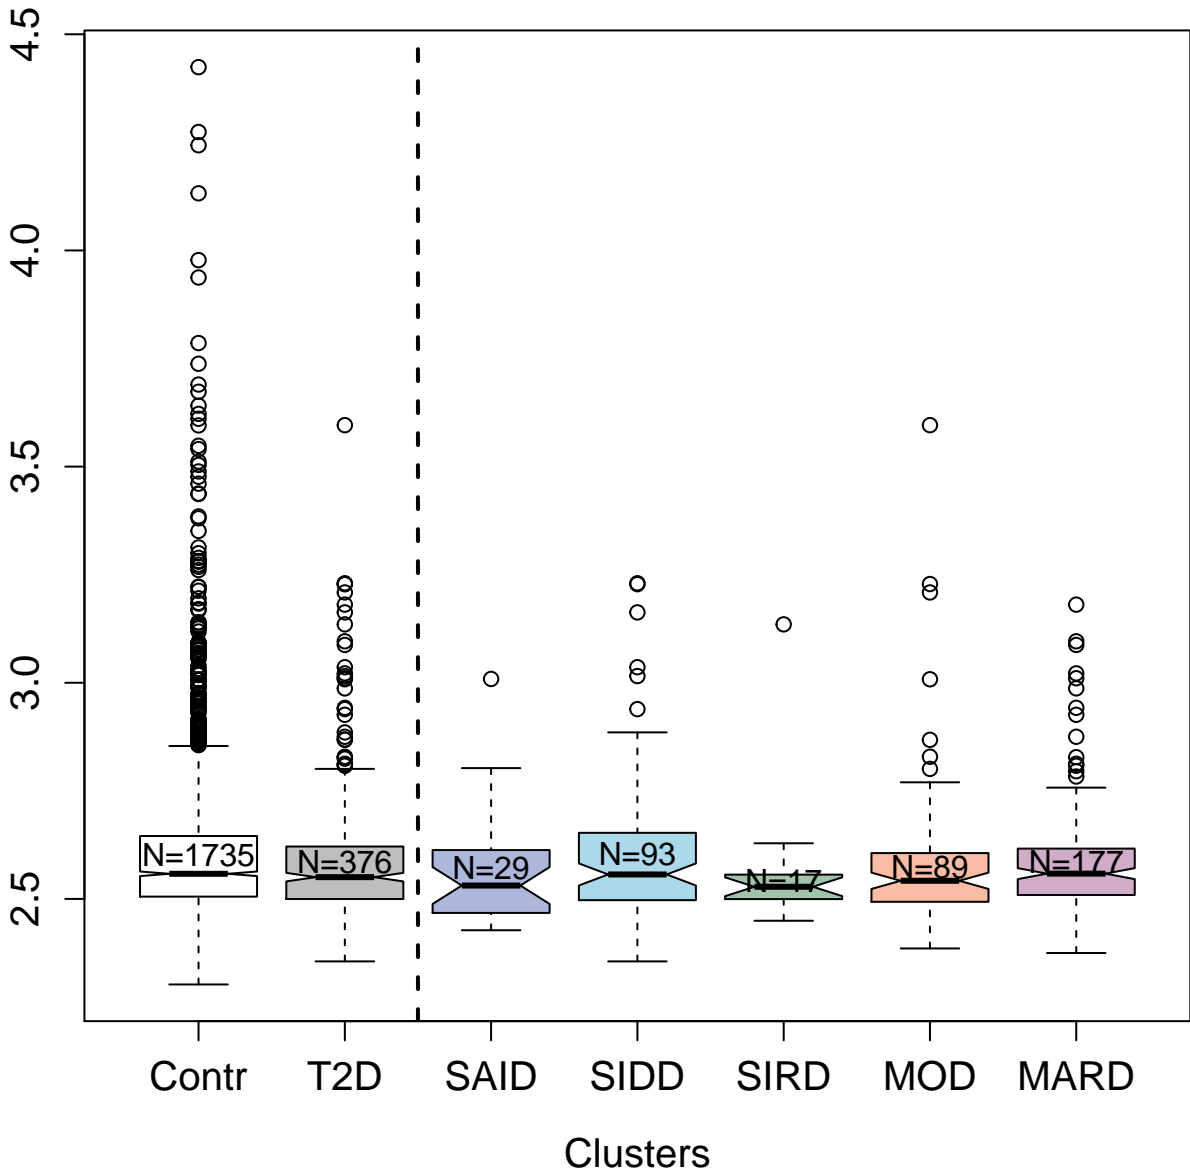

3392-68\_2 : RAC-alpha/beta/gamma  
serine/threonine-protein kinase

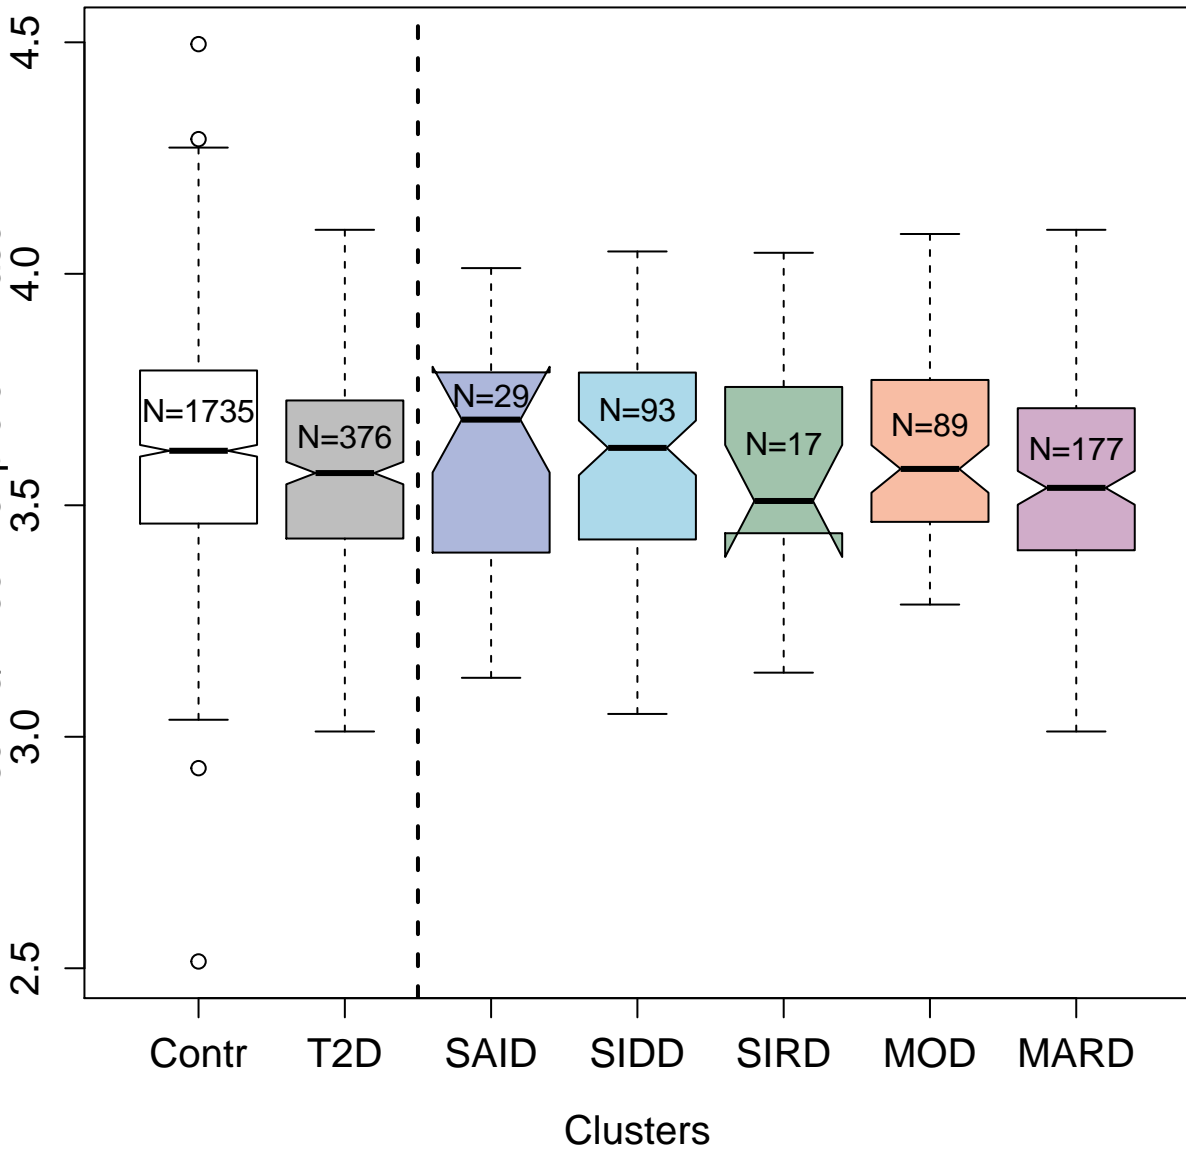

5226-36\_3 : Casein kinase II 2-alpha':2-beta heterotetramer

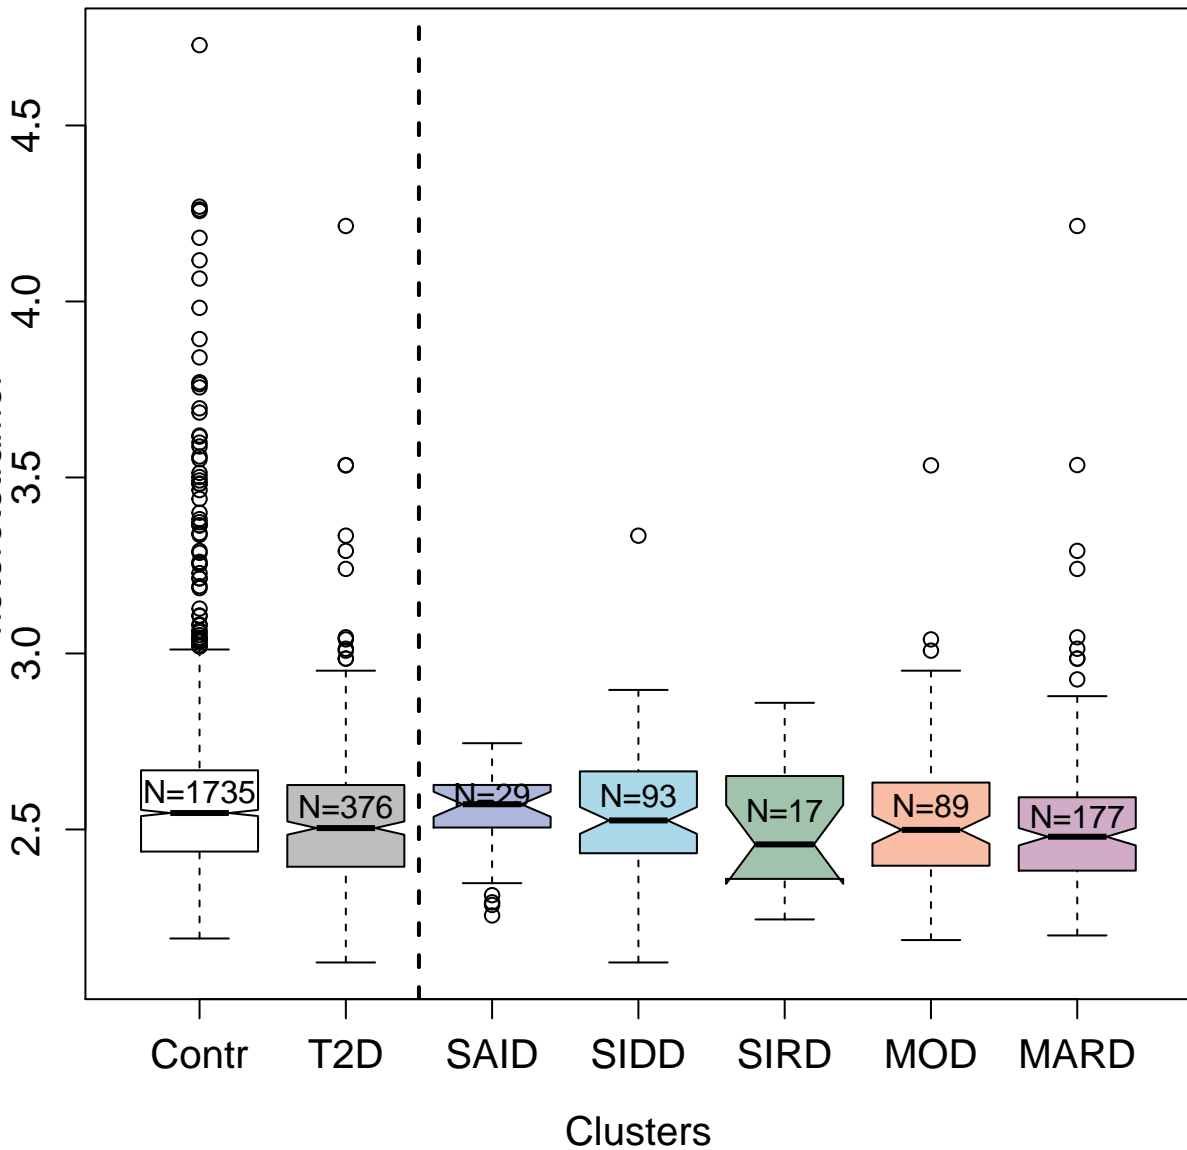

4769-10\_3 : Olfactomedin-4

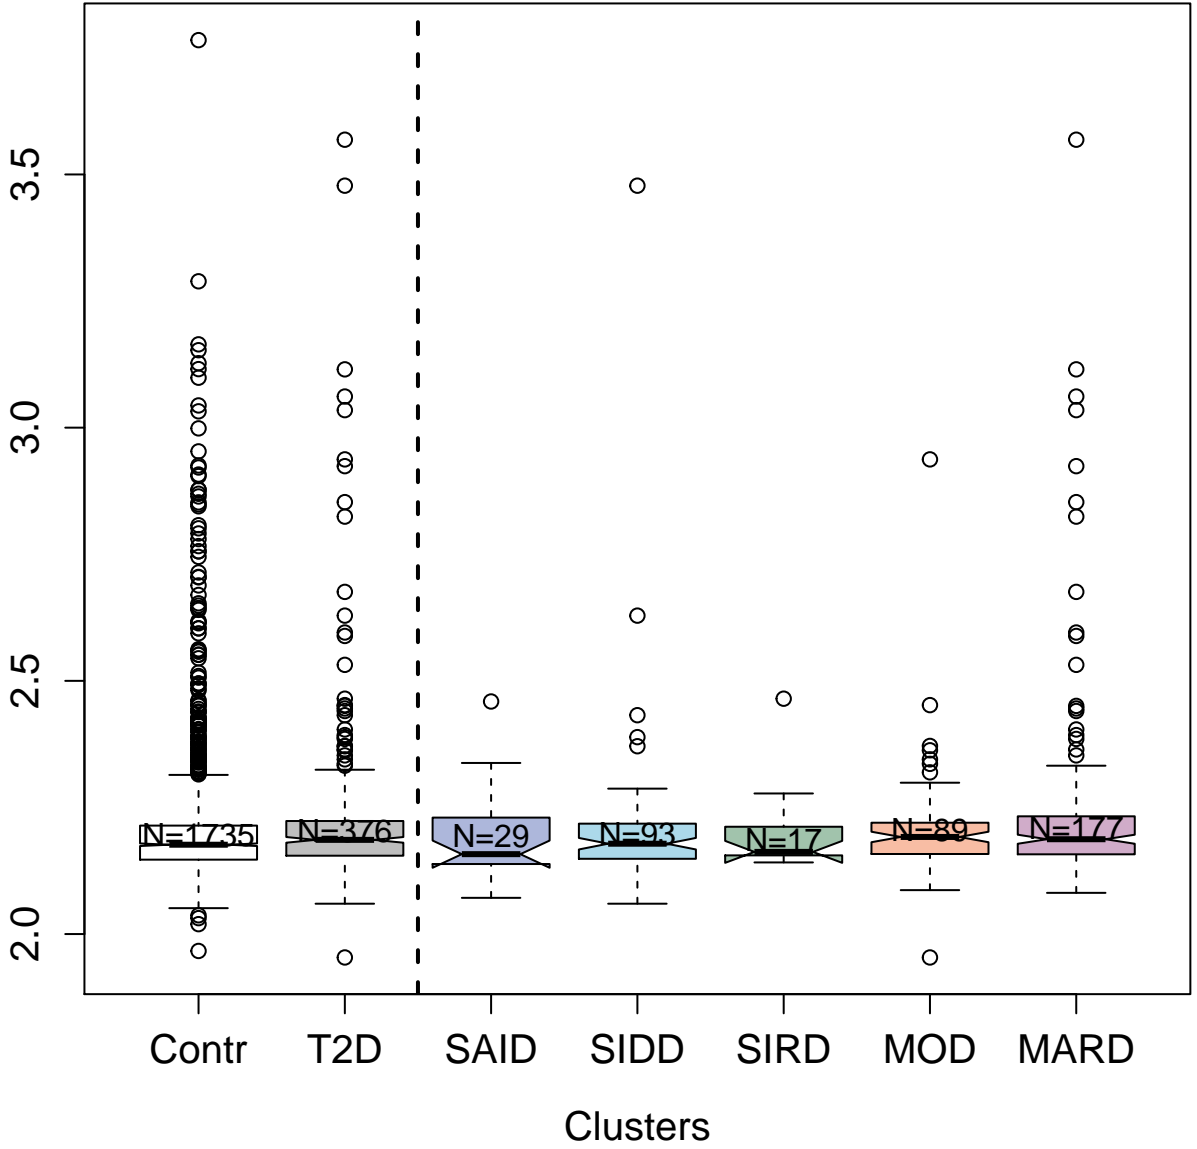

2633-52\_2 : Interleukin-13 receptor subunit

$\alpha$ -1

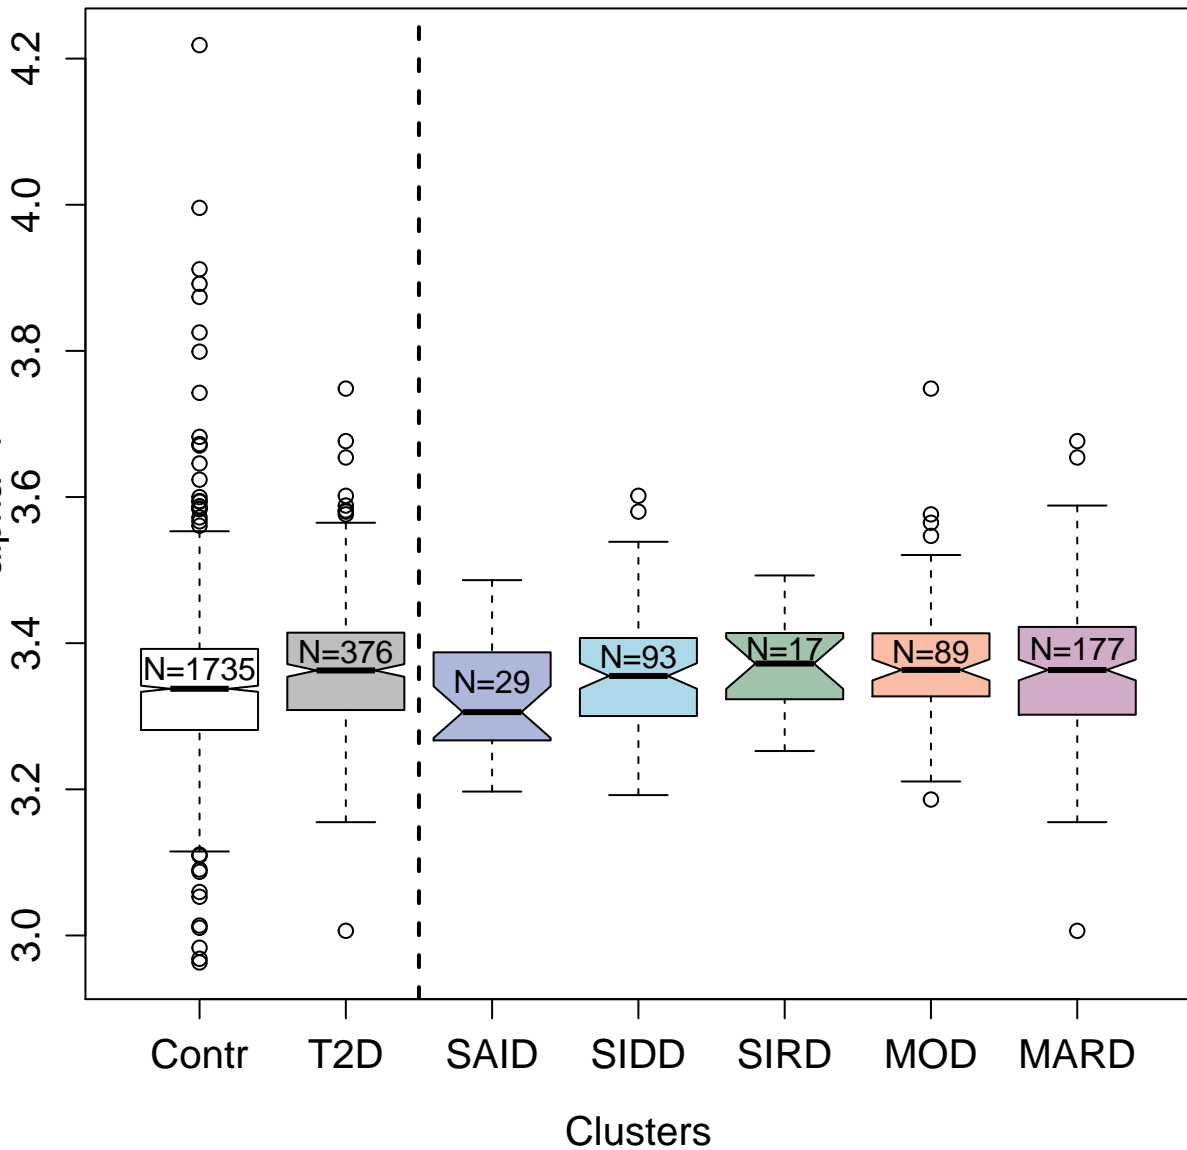



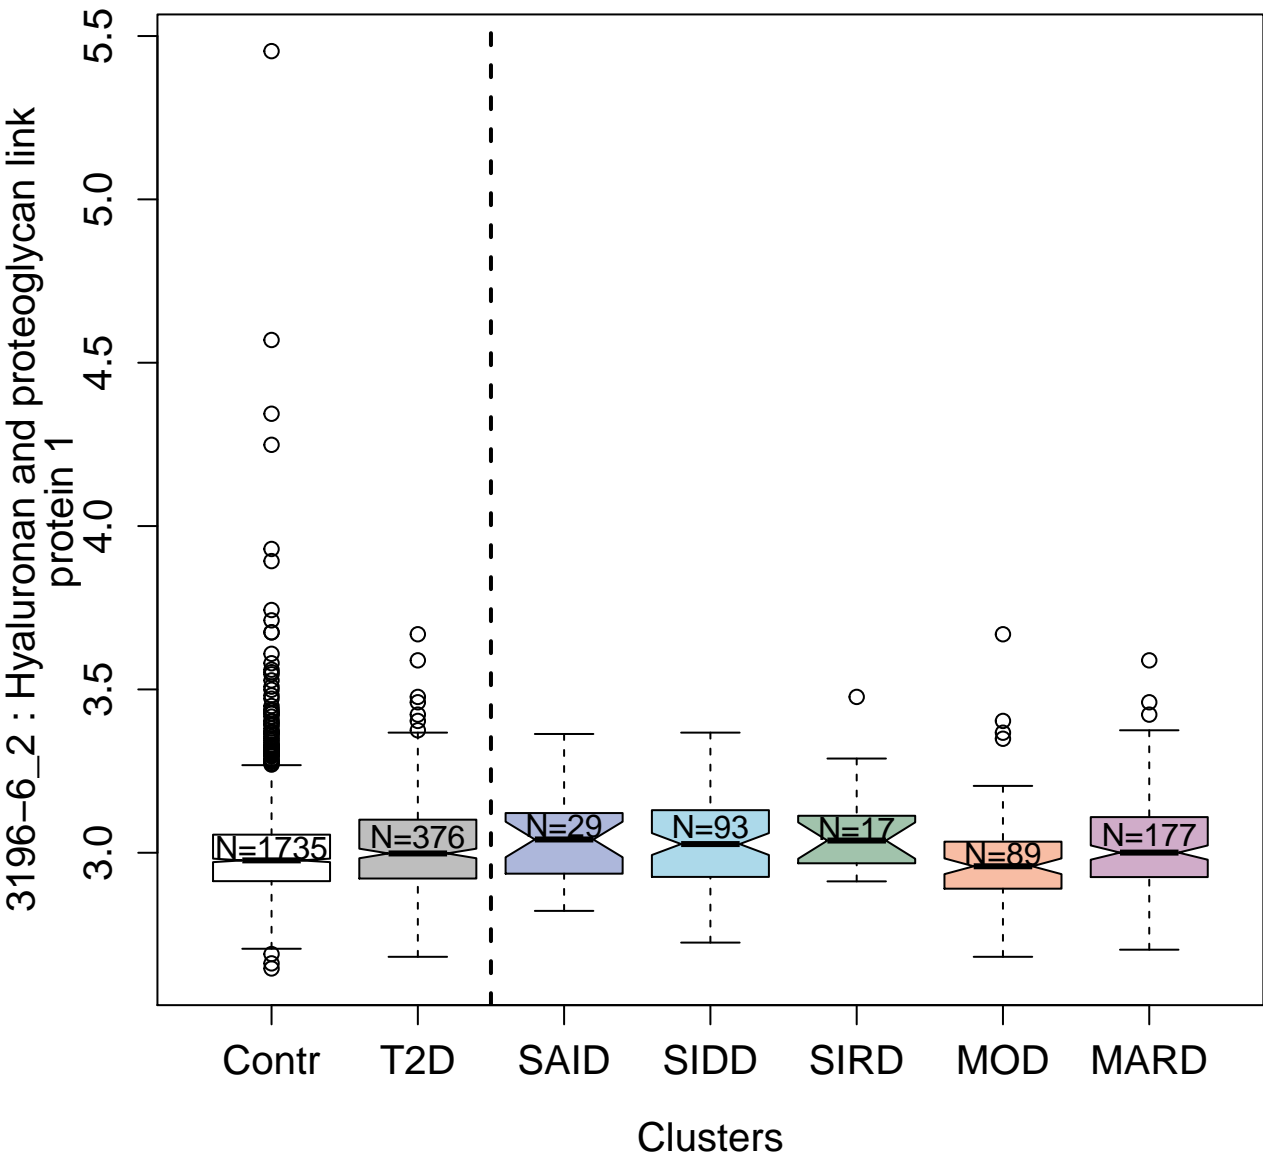

5261-13\_3 : Abelson tyrosine-protein kinase 2

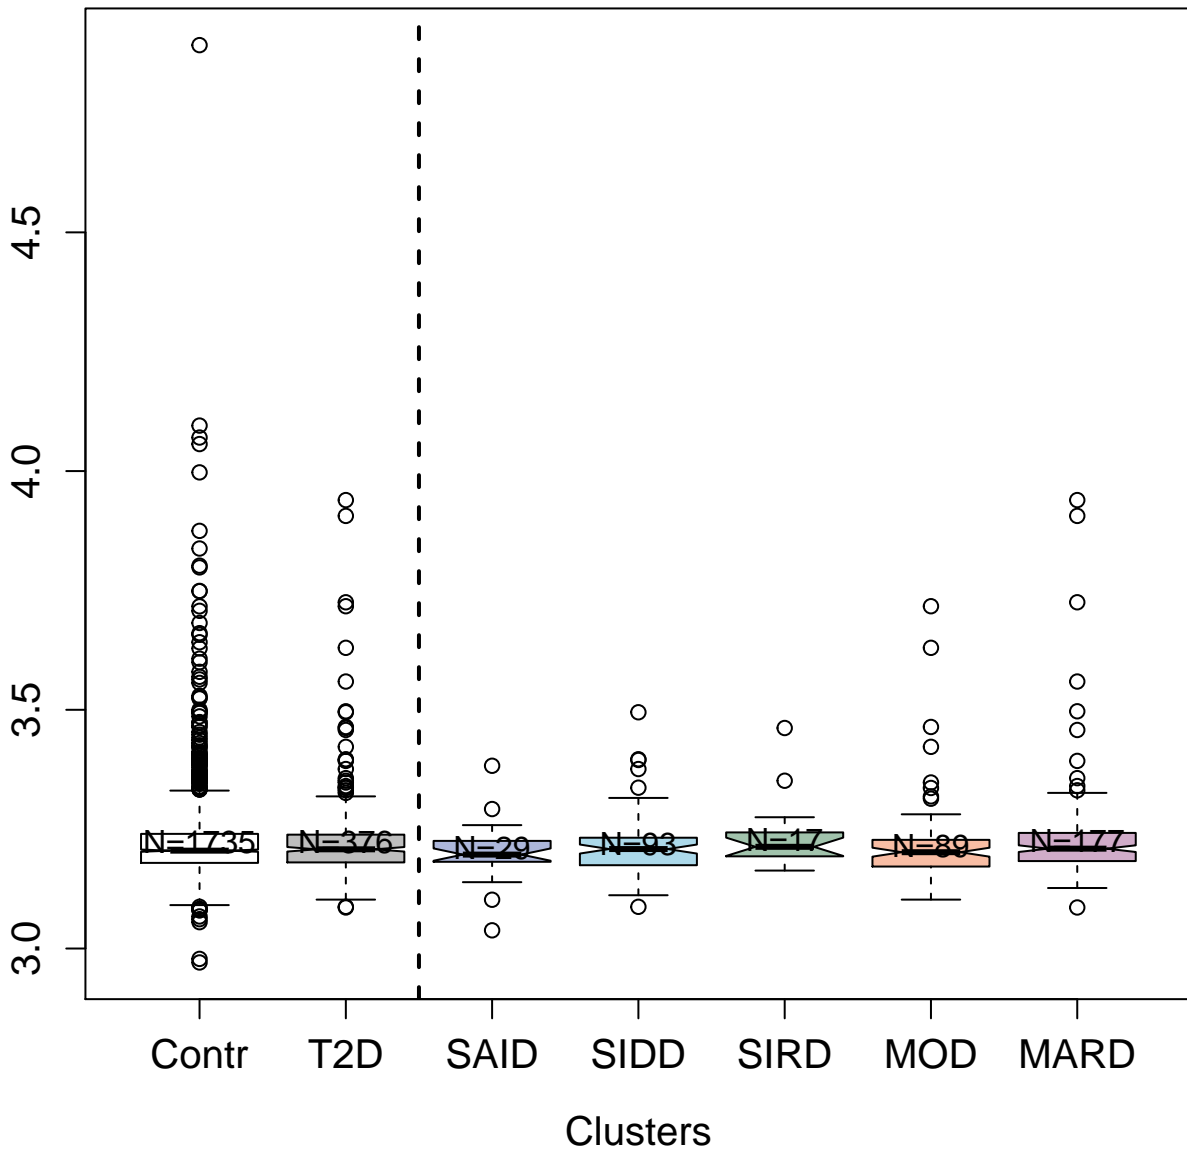



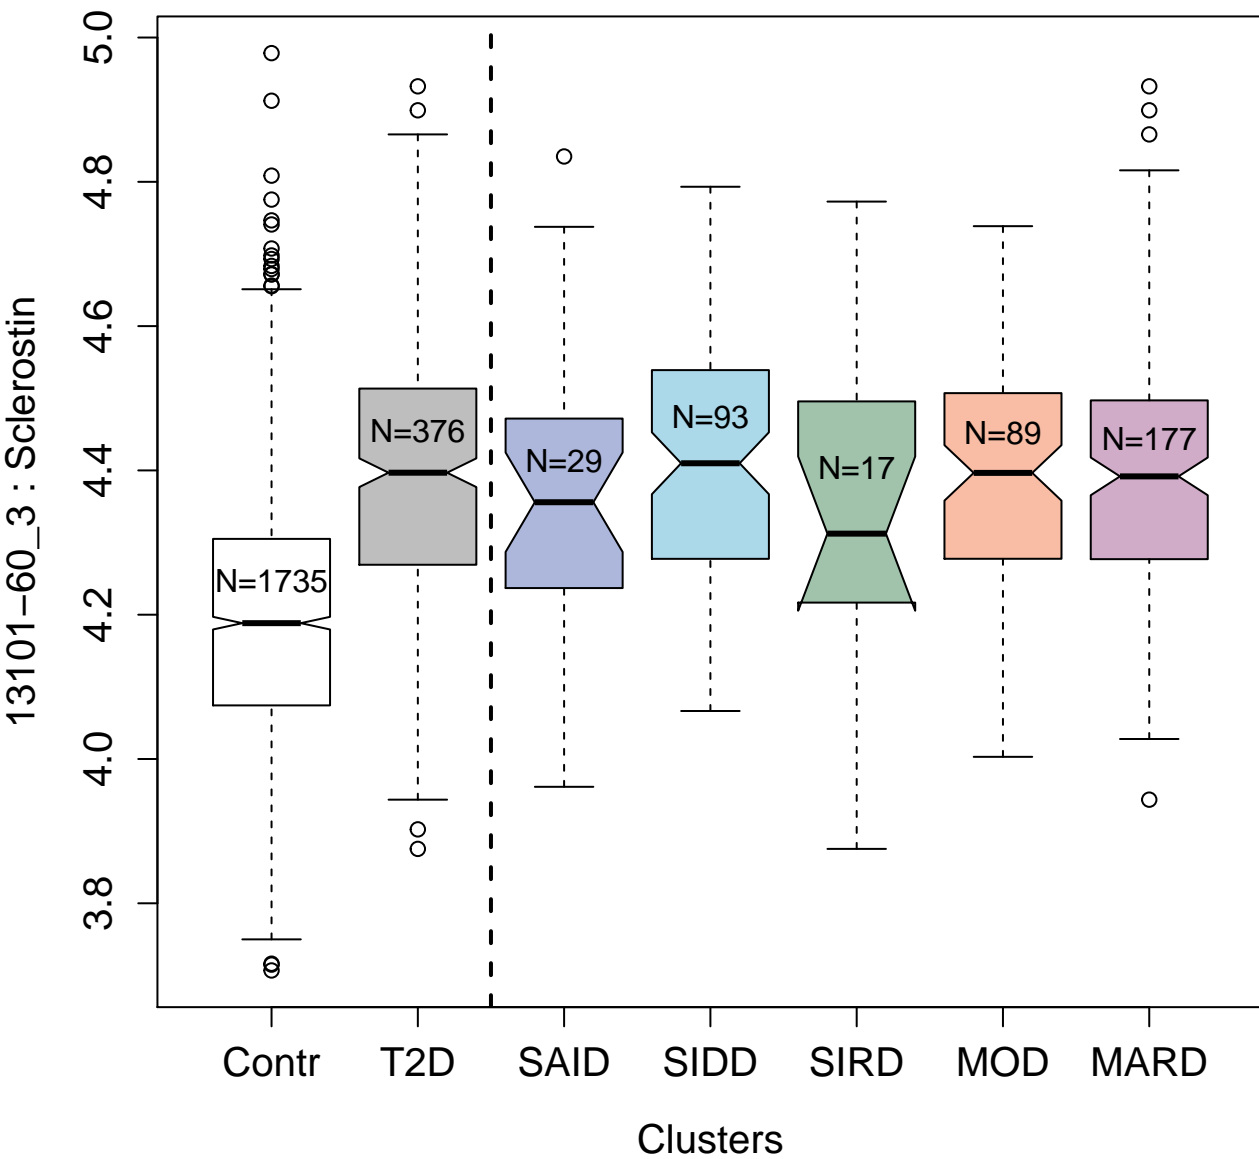

2571-12\_3 : Insulin-like growth factor-binding protein 3

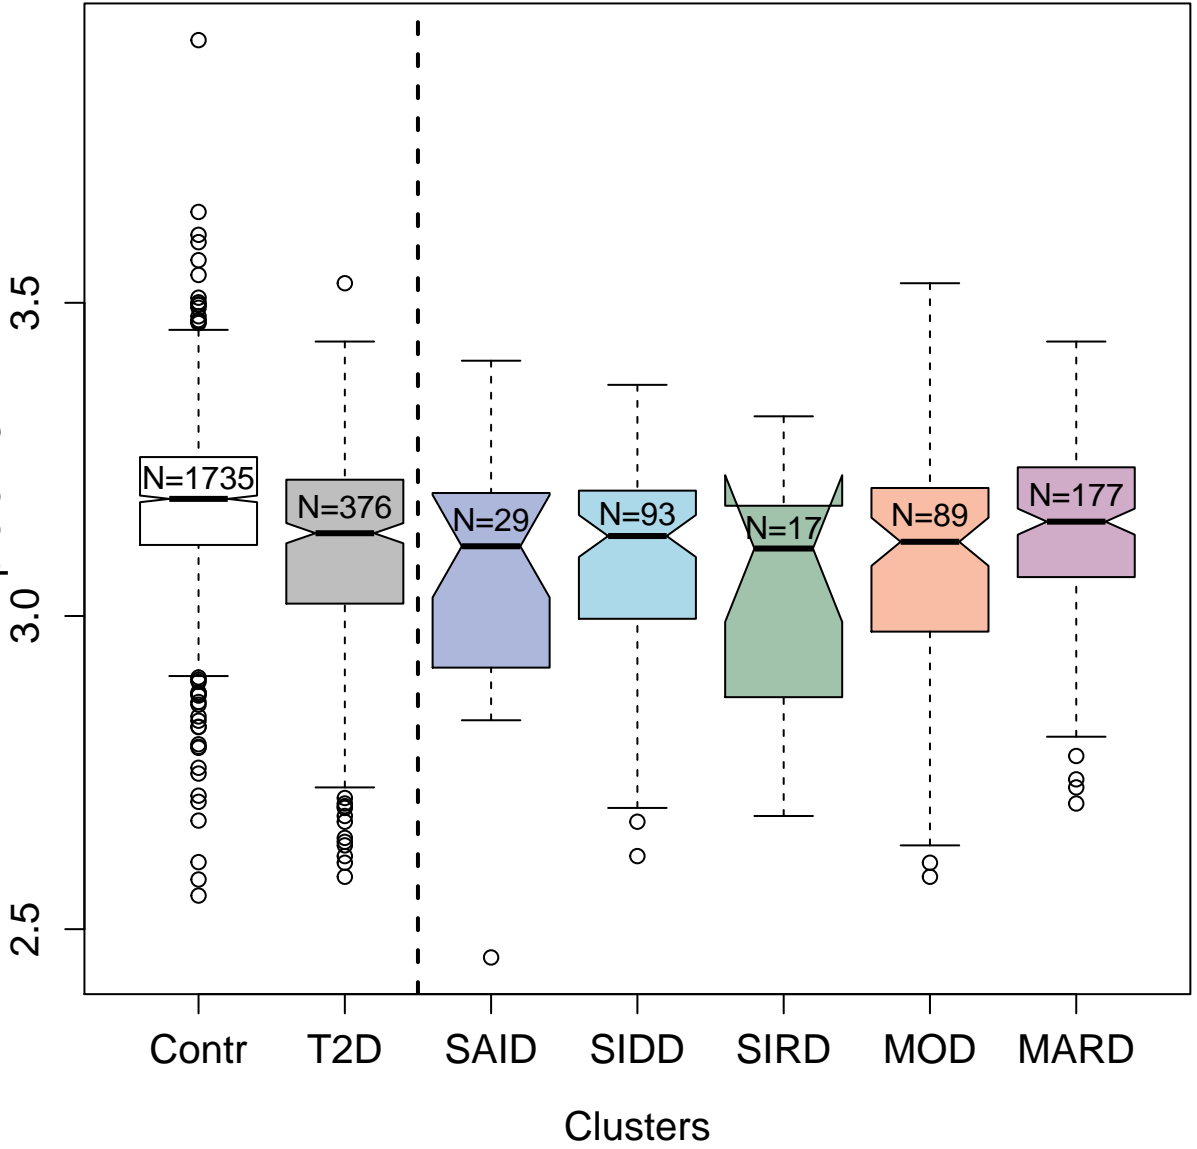

5227-60\_3 : [Pyruvate dehydrogenase (acetyl-transferring)] kinase isozyme 1; mitochondrial

3.0

3.5

4.5

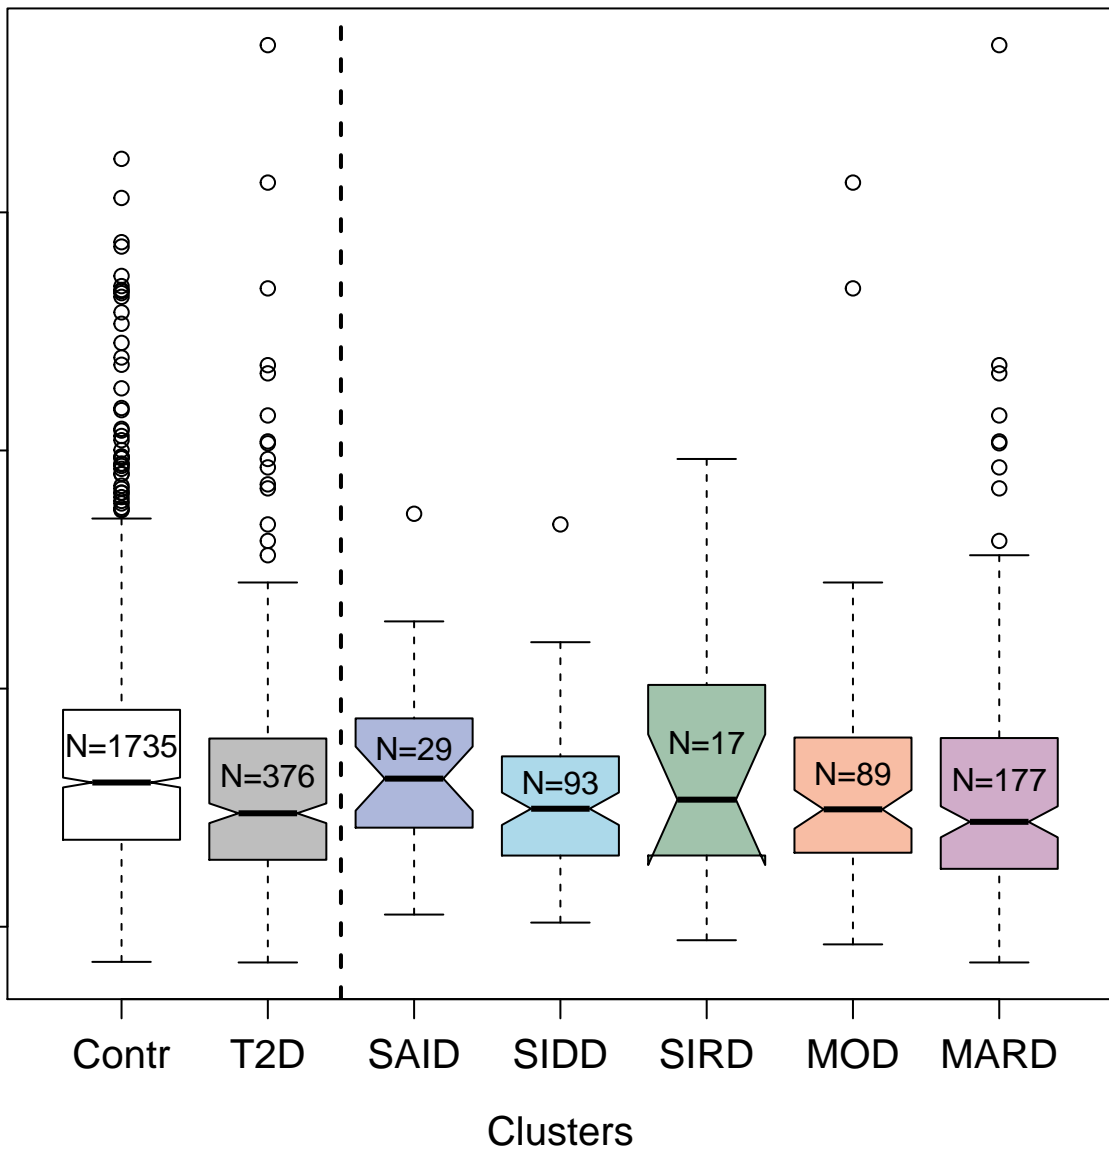

3806-55\_1 : Ephrin type-A receptor 5

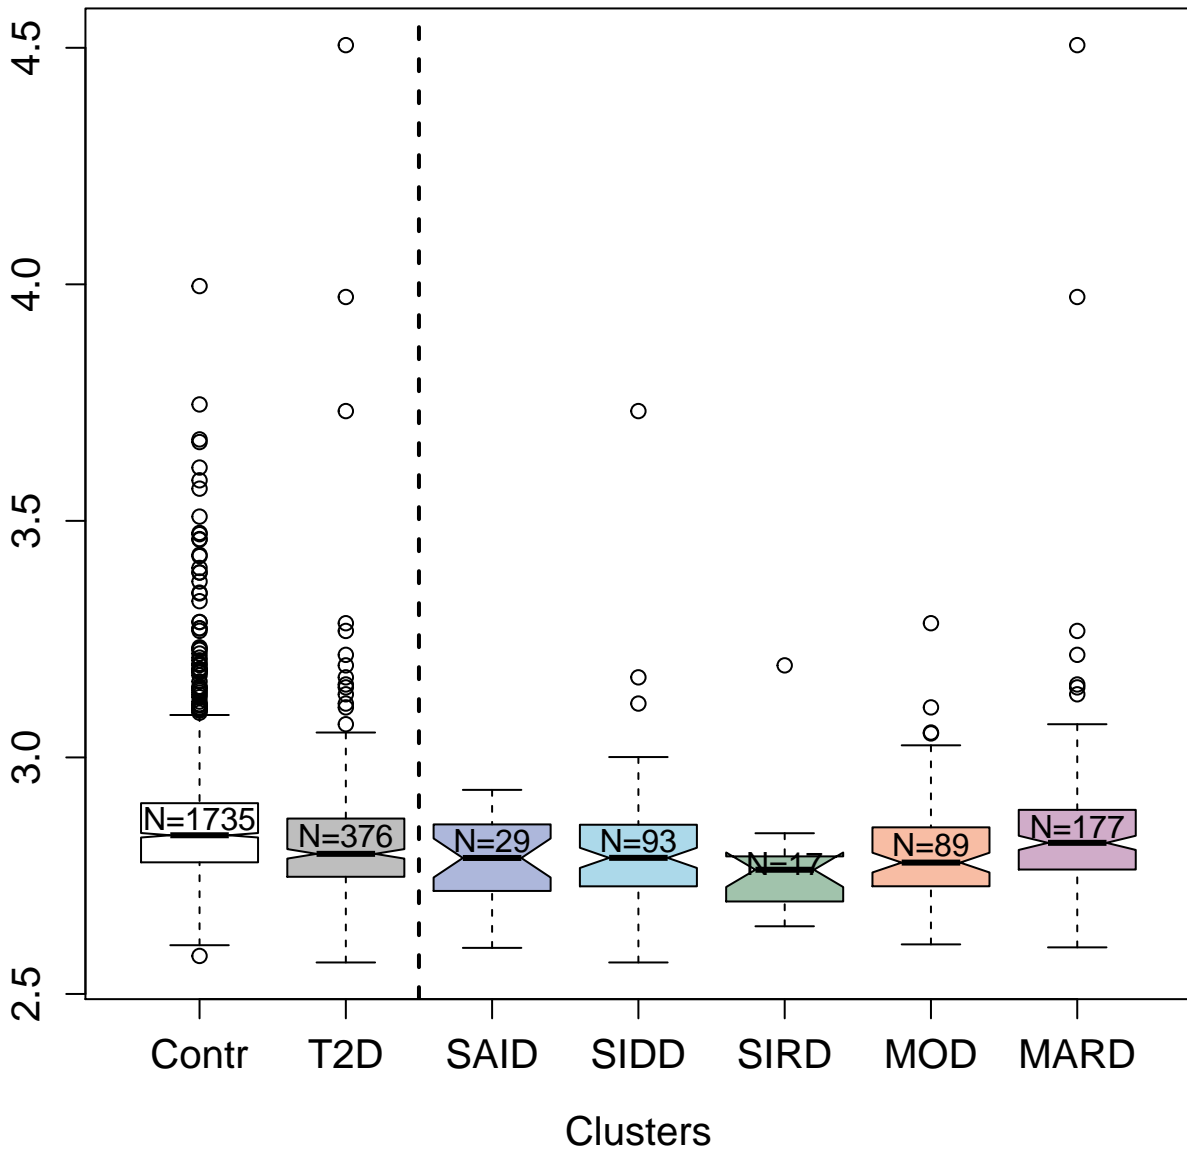

4981-6\_1 : Desmocollin-3

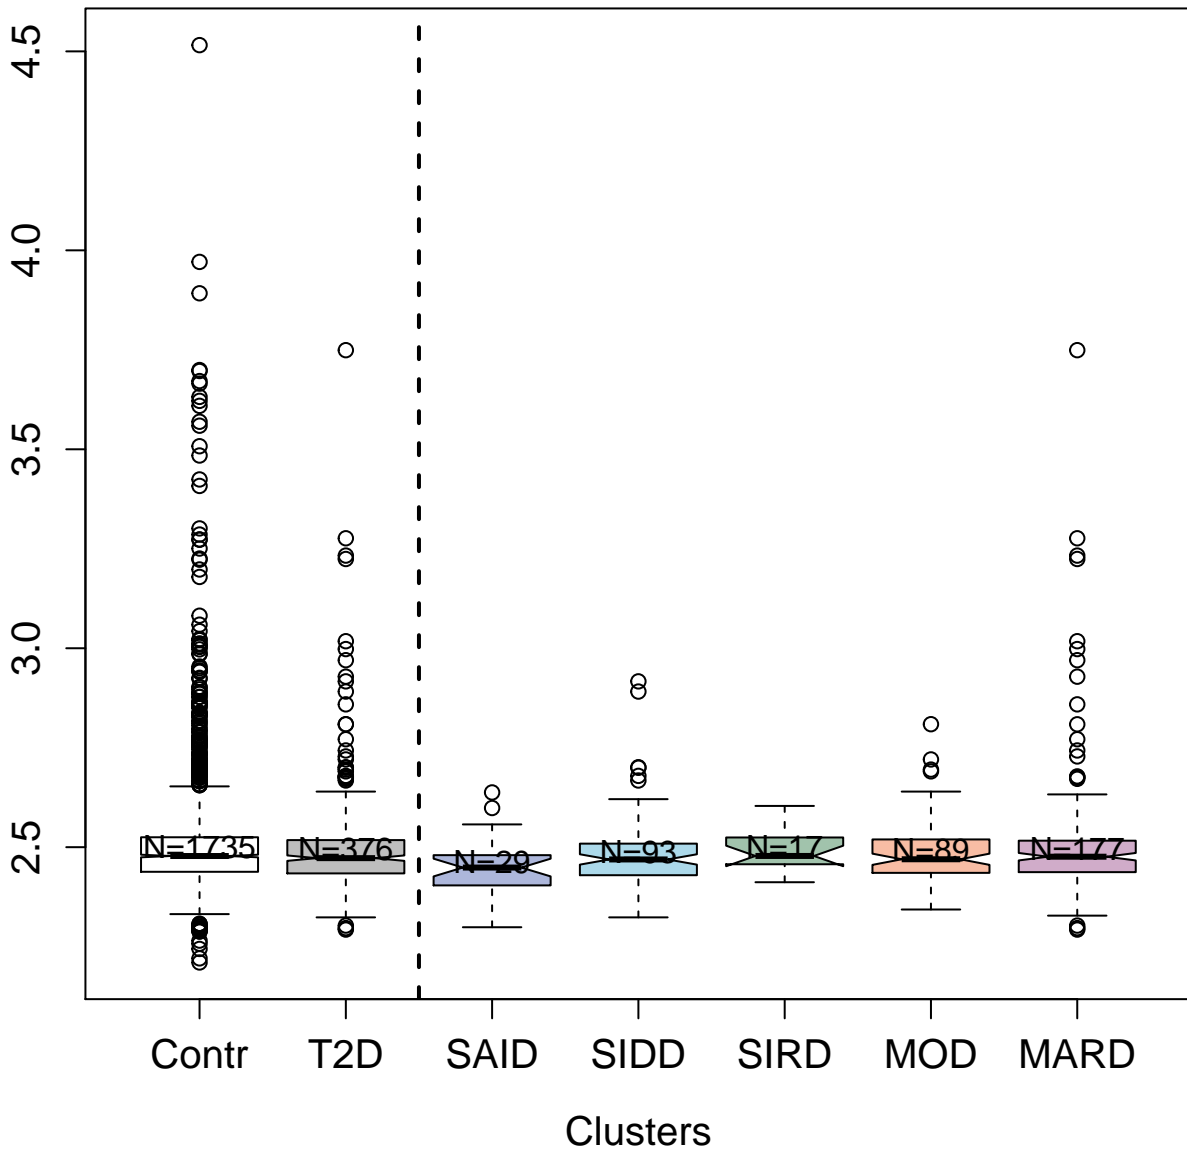

3358-51\_2 : Cyclin-dependent kinase  
5:Cyclin-dependent kinase 5 activator 1 complex

2.5 3.0 3.5 4.0

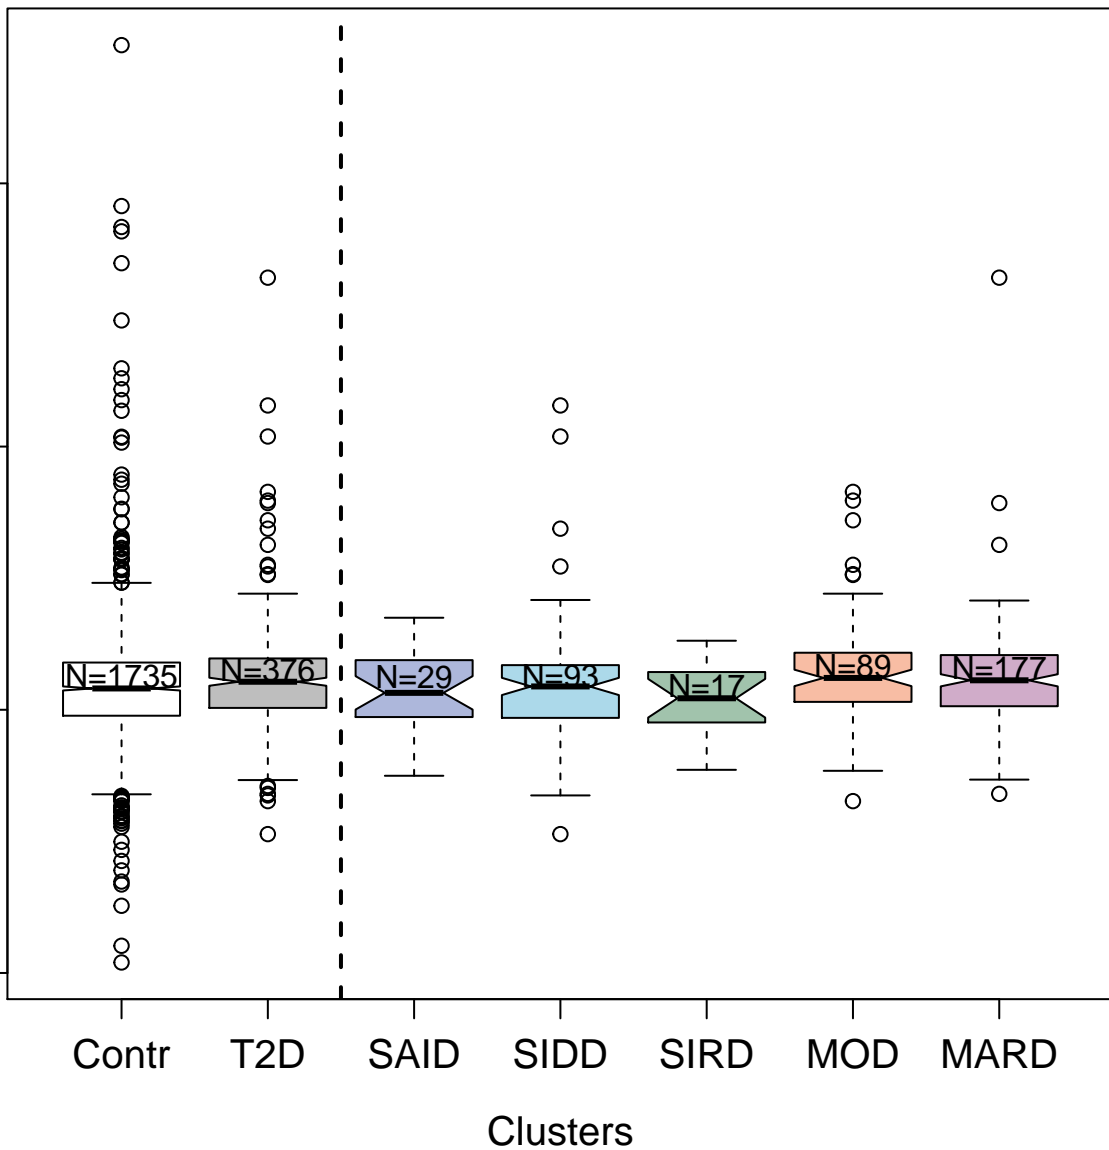

4159-130\_1 : Complement factor H

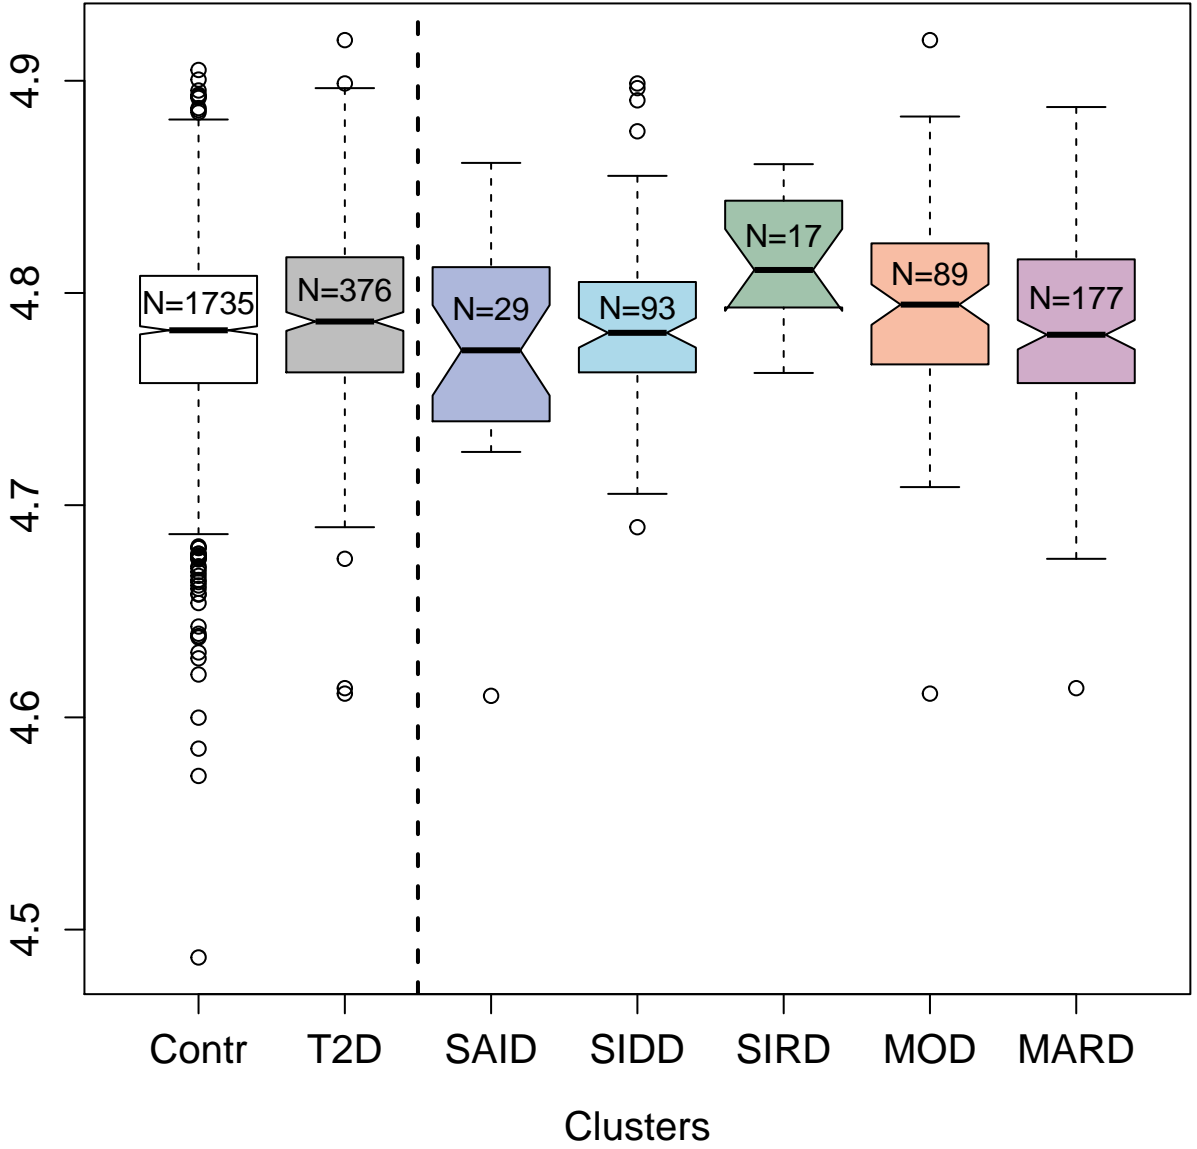

6641-60\_3 : PolyUbiquitin K48-linked

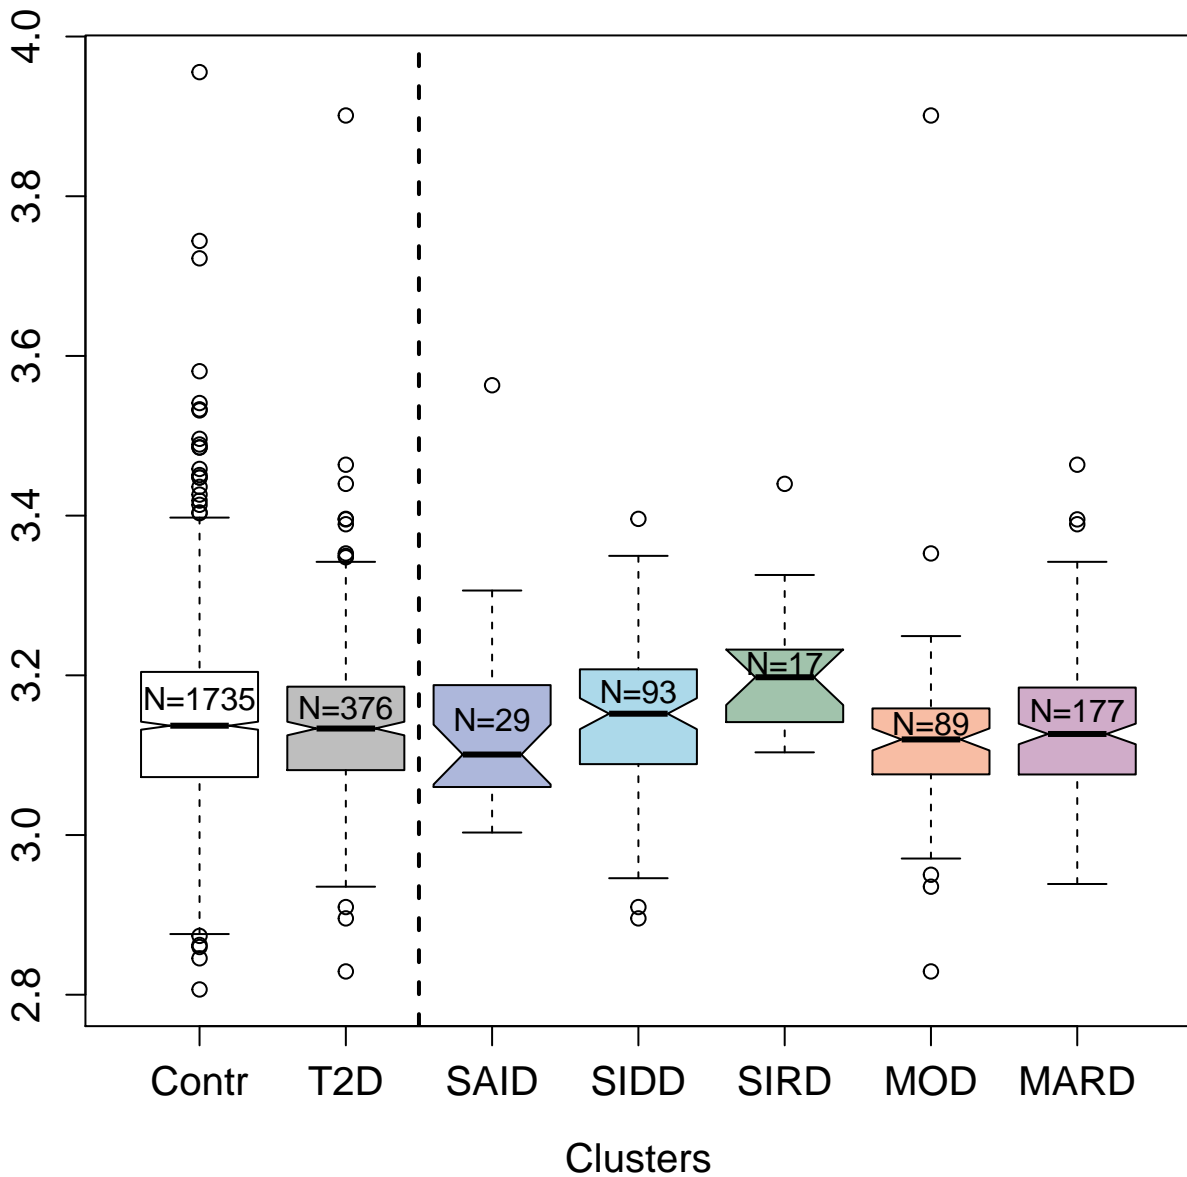



3034-1\_2 : Glial fibrillary acidic protein

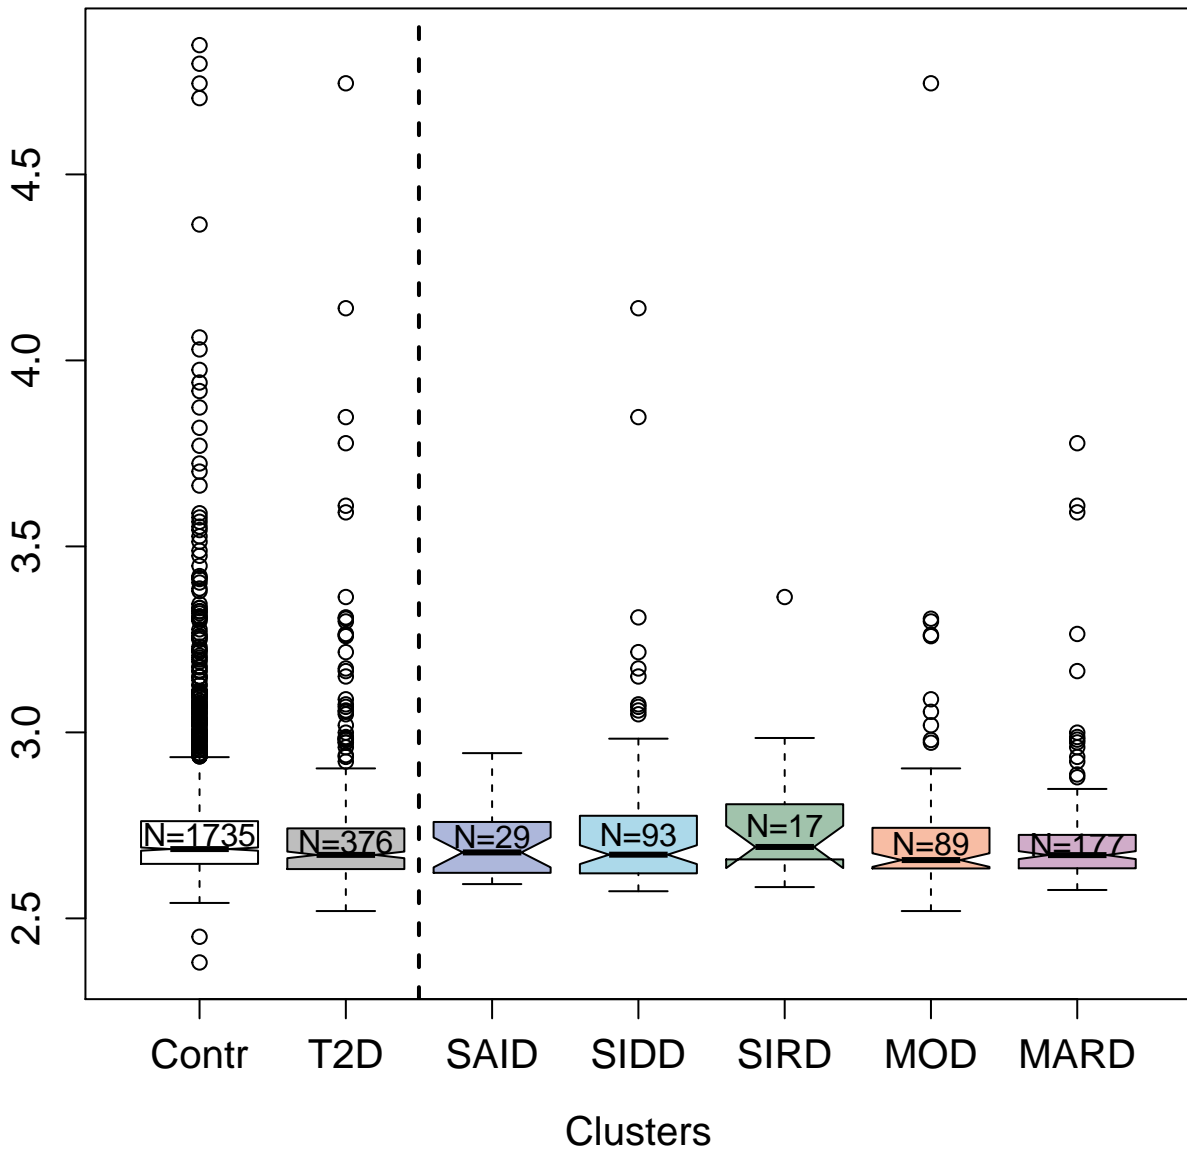

3494-71\_3 : Fibroblast growth factor 17

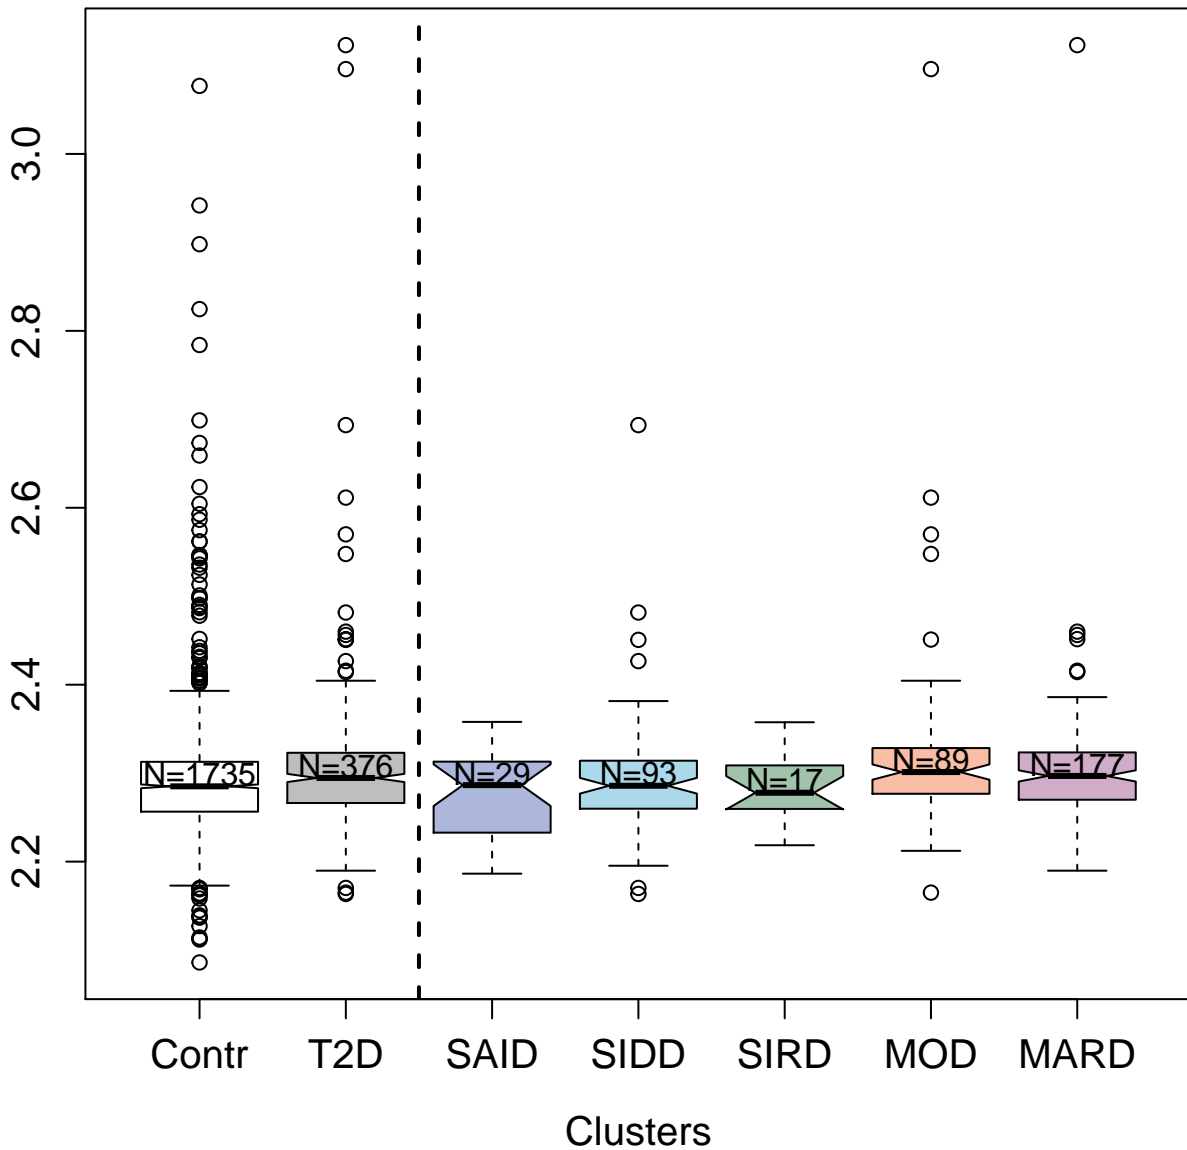

4139-71\_2 : Interleukin-6 receptor subunit alpha

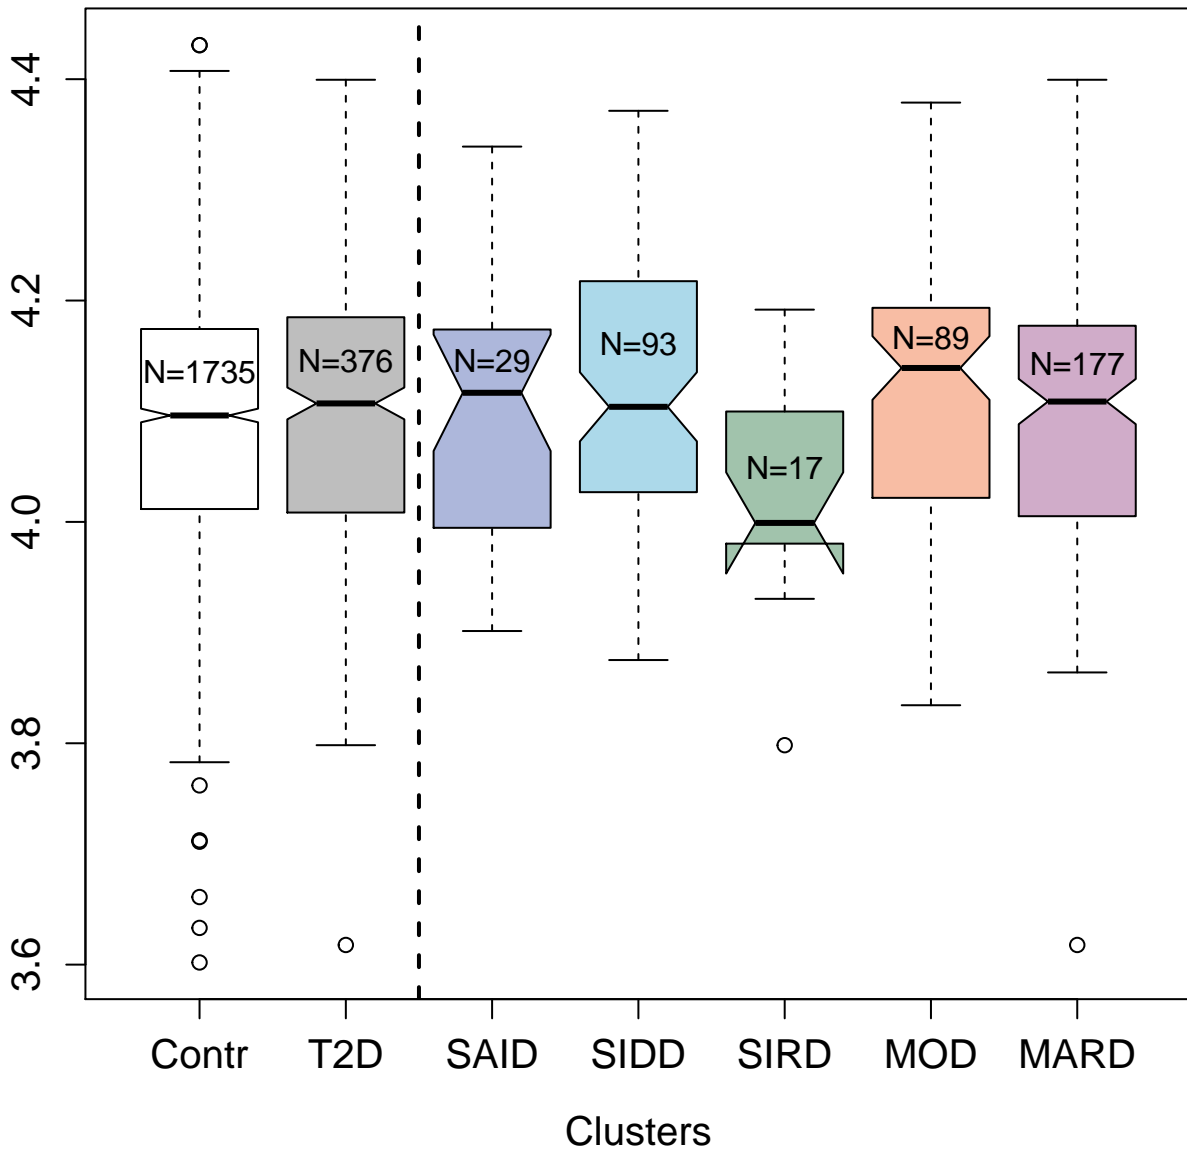

3499-77\_2 : Interleukin-17B

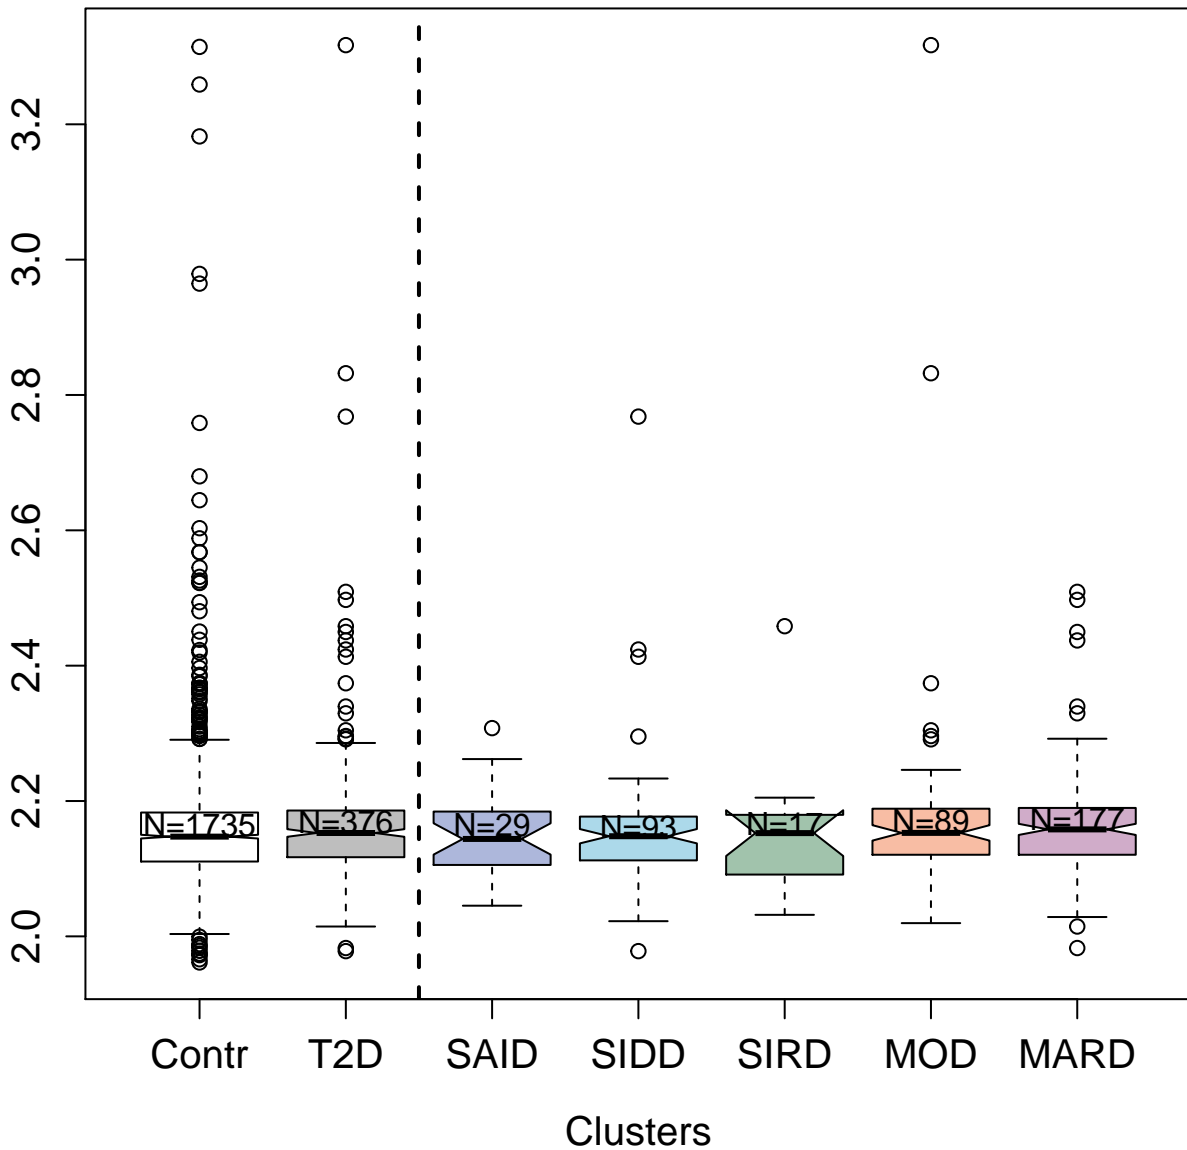

5265-12\_3 : GRB2-related adapter protein 2

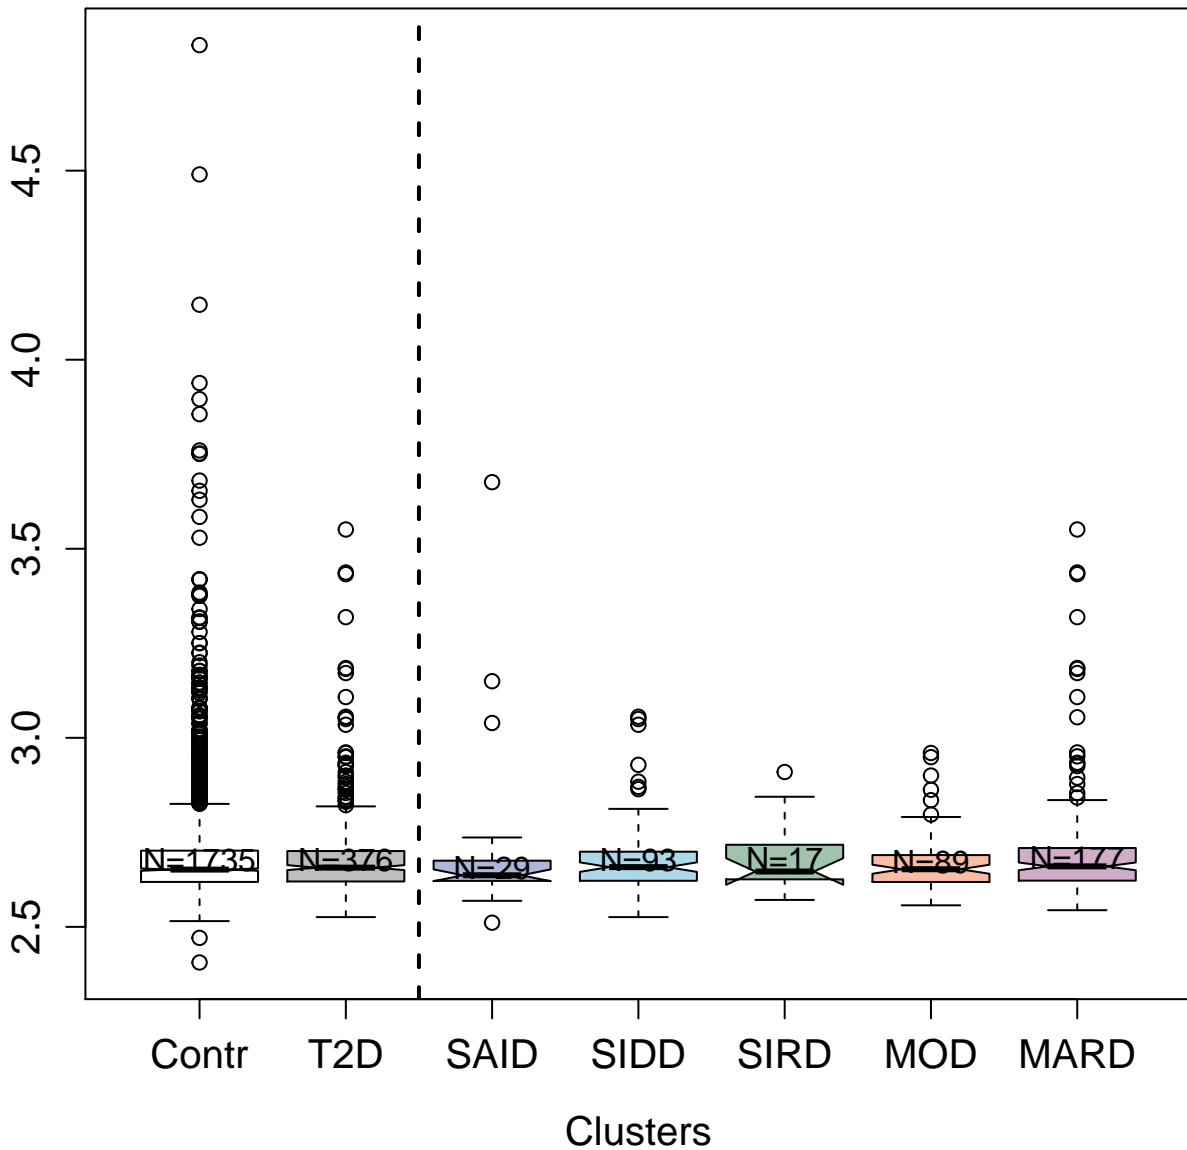

3620-67\_2 : Interleukin-22 receptor subunit  
alpha-1

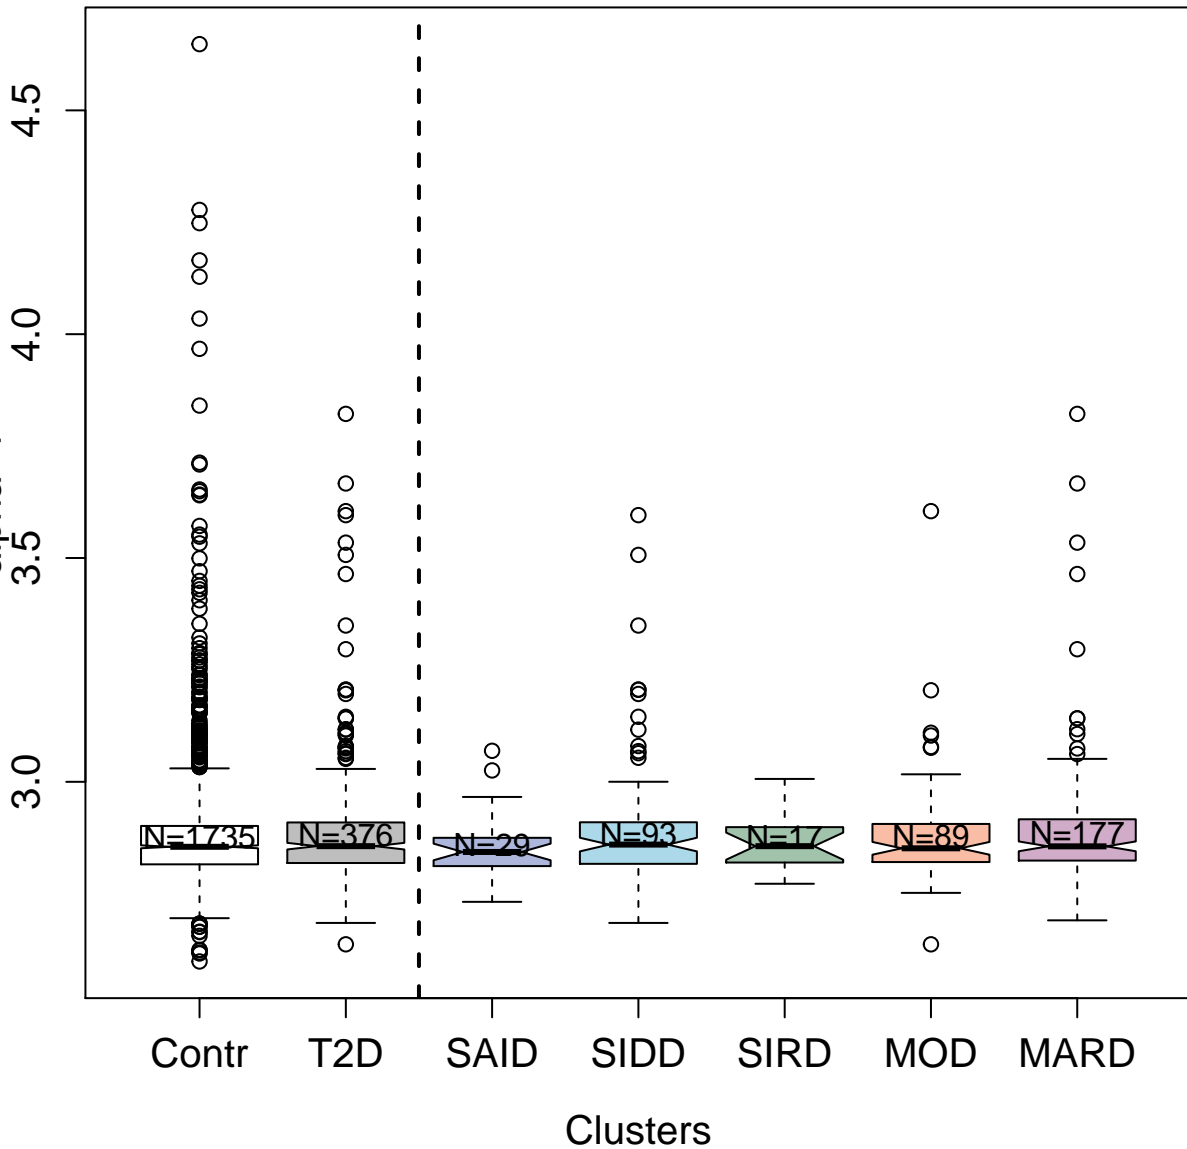

4232-19\_2 : Insulin-like growth factor 1 receptor

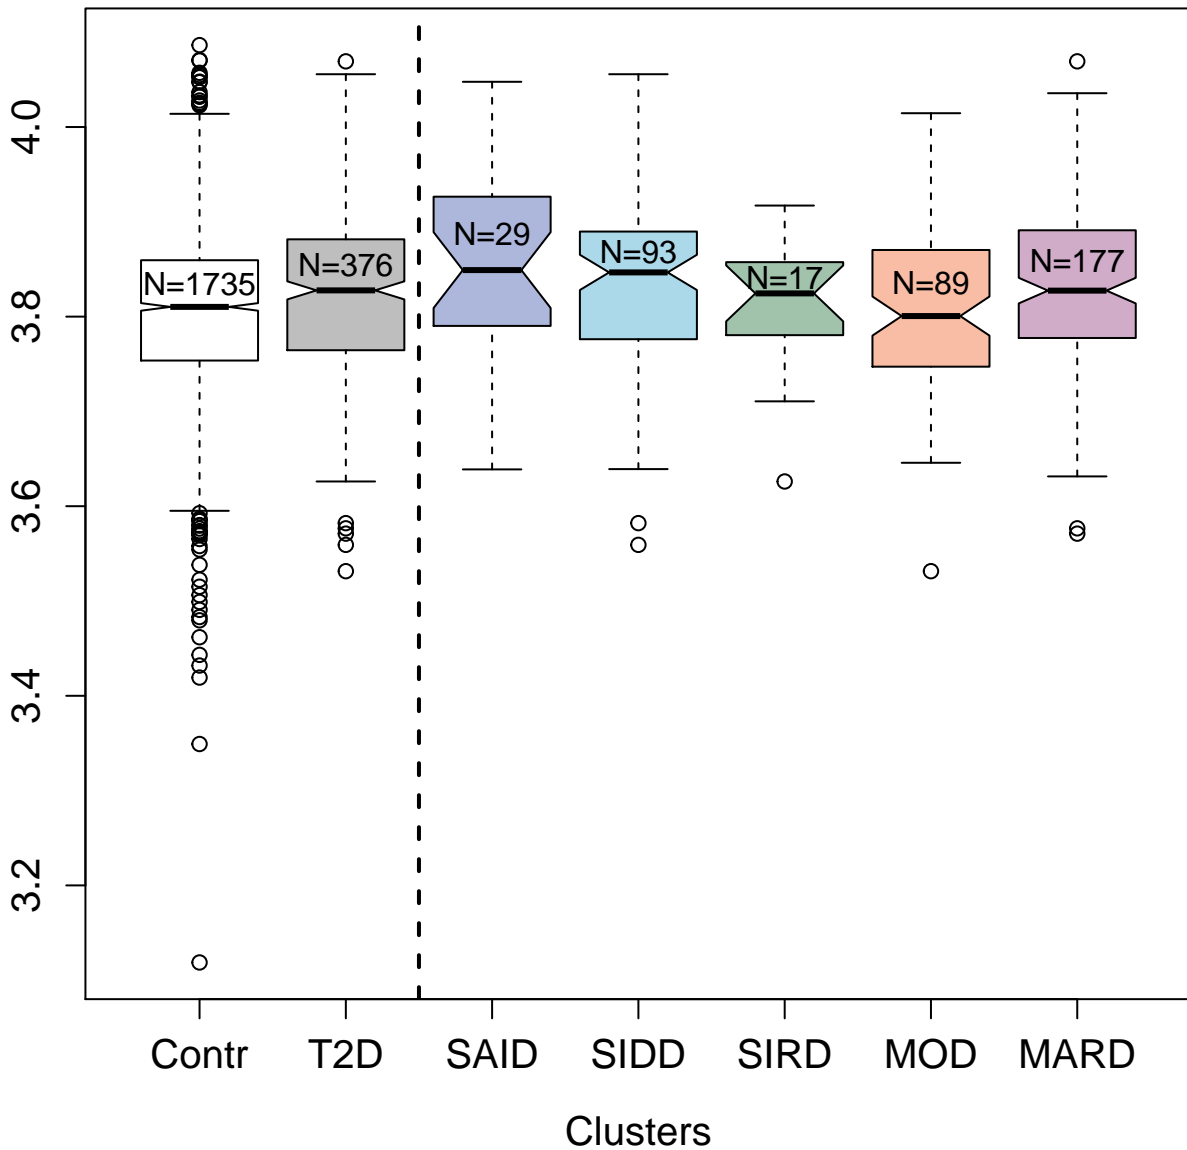

2616-23\_18 : Receptor tyrosine-protein kinase  
erbB-2

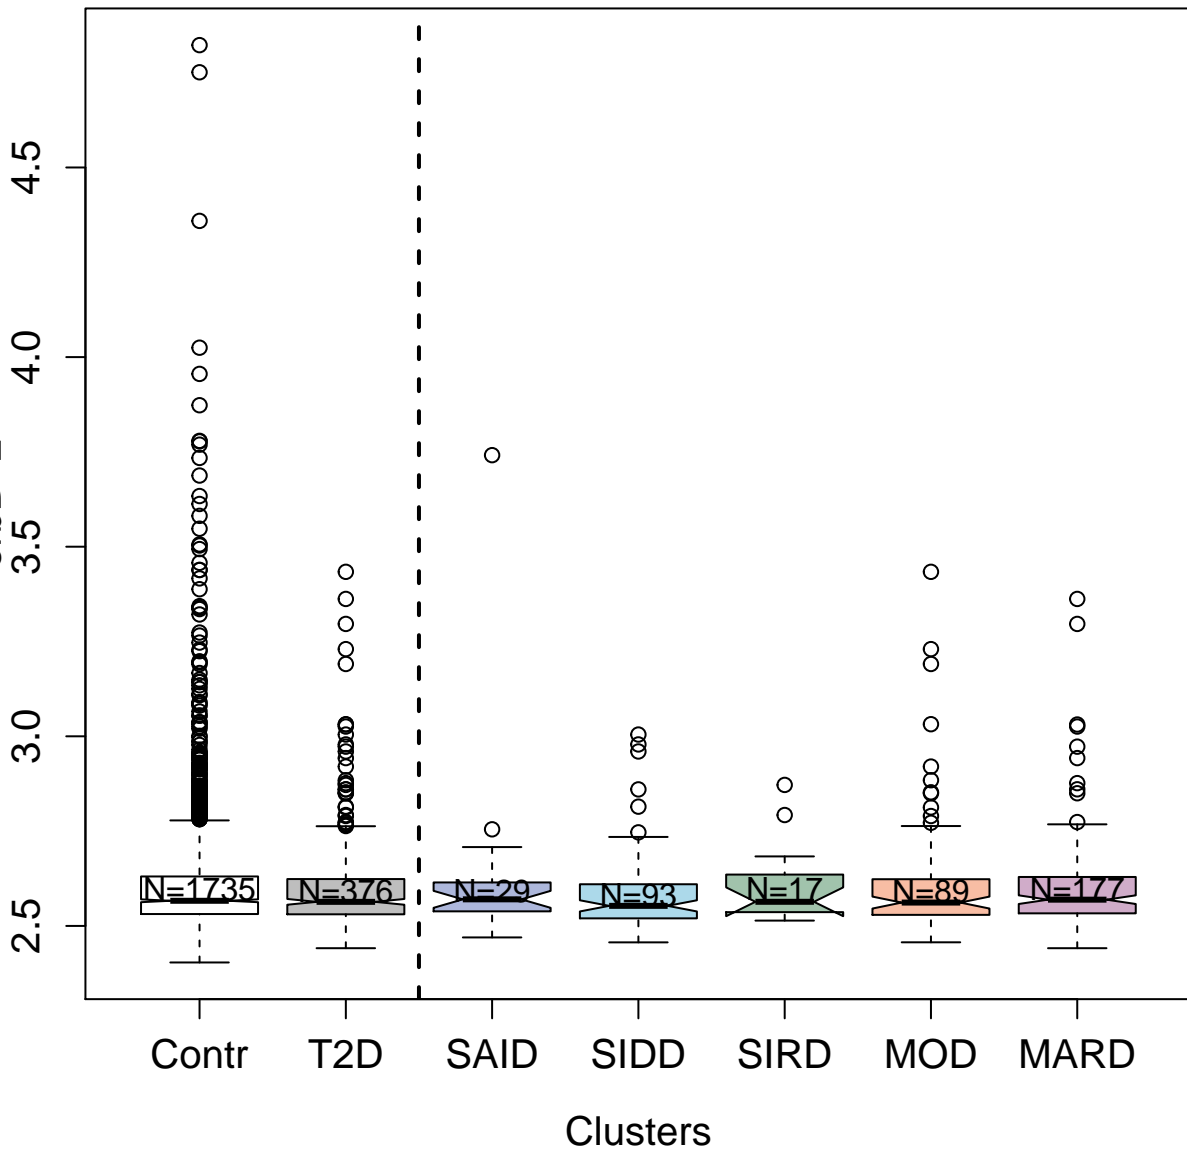



4959-2\_1 : Anterior gradient protein 2 homolog

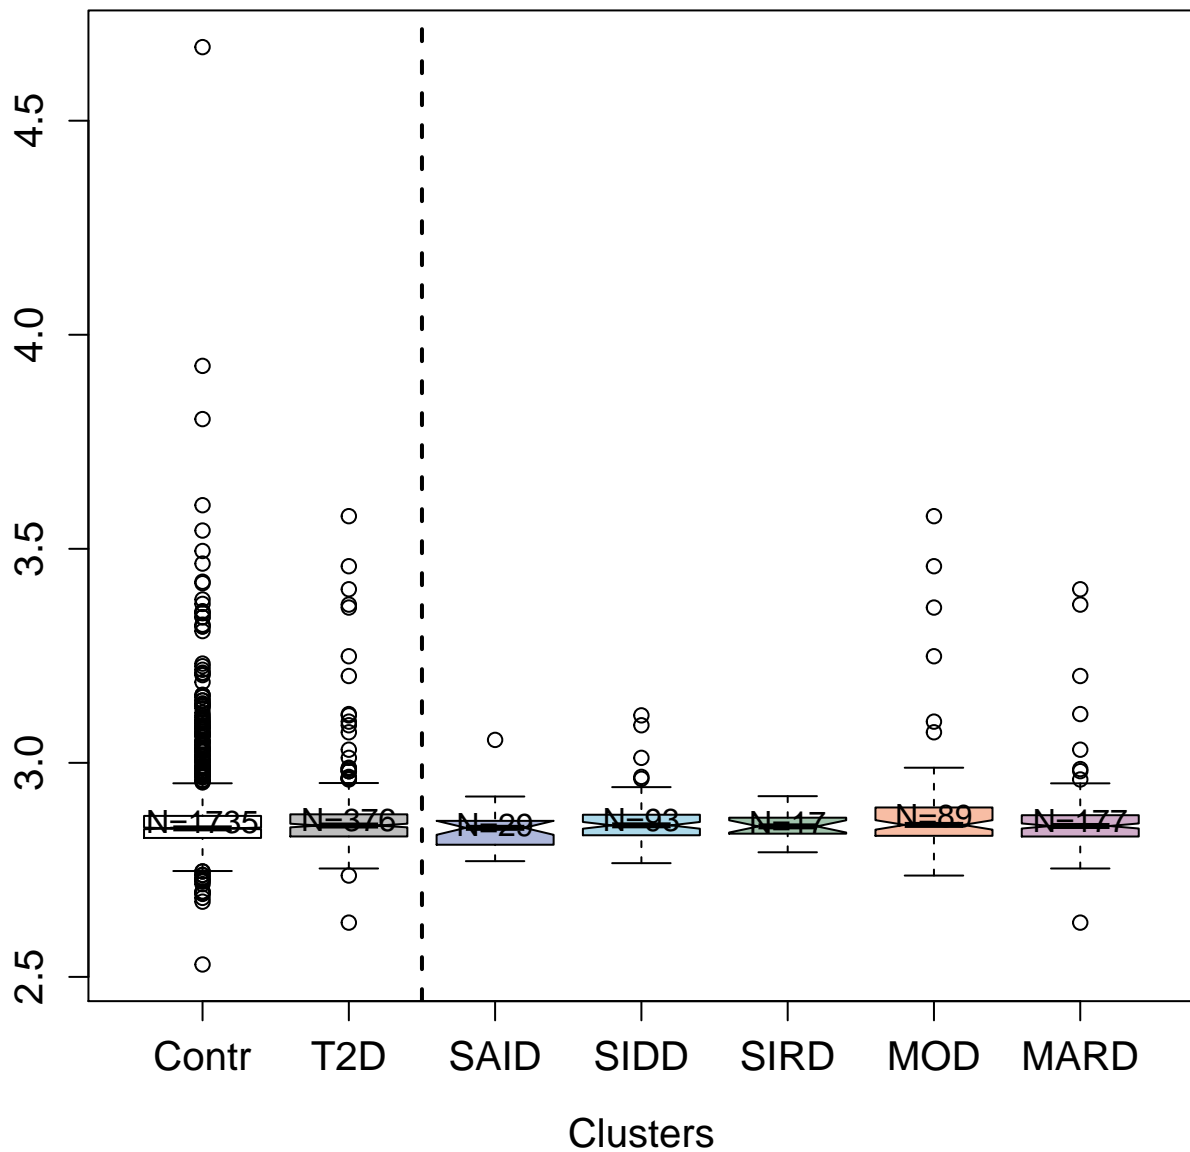

4126-22\_1 : Bactericidal permeability-increasing protein

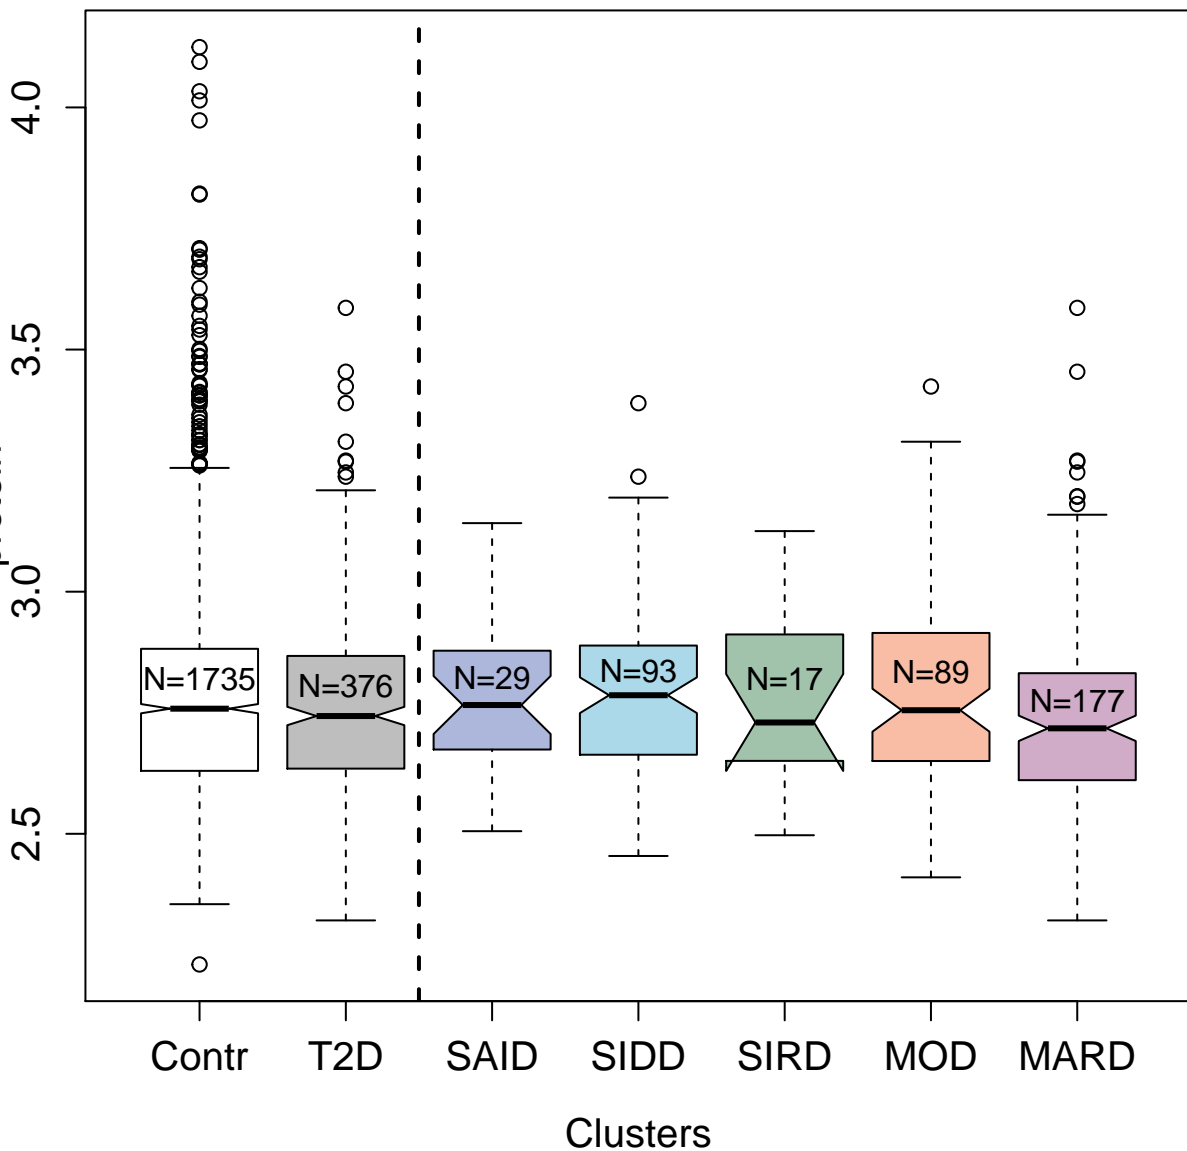

2969-11\_1 : Serine/threonine-protein kinase  
receptor R3

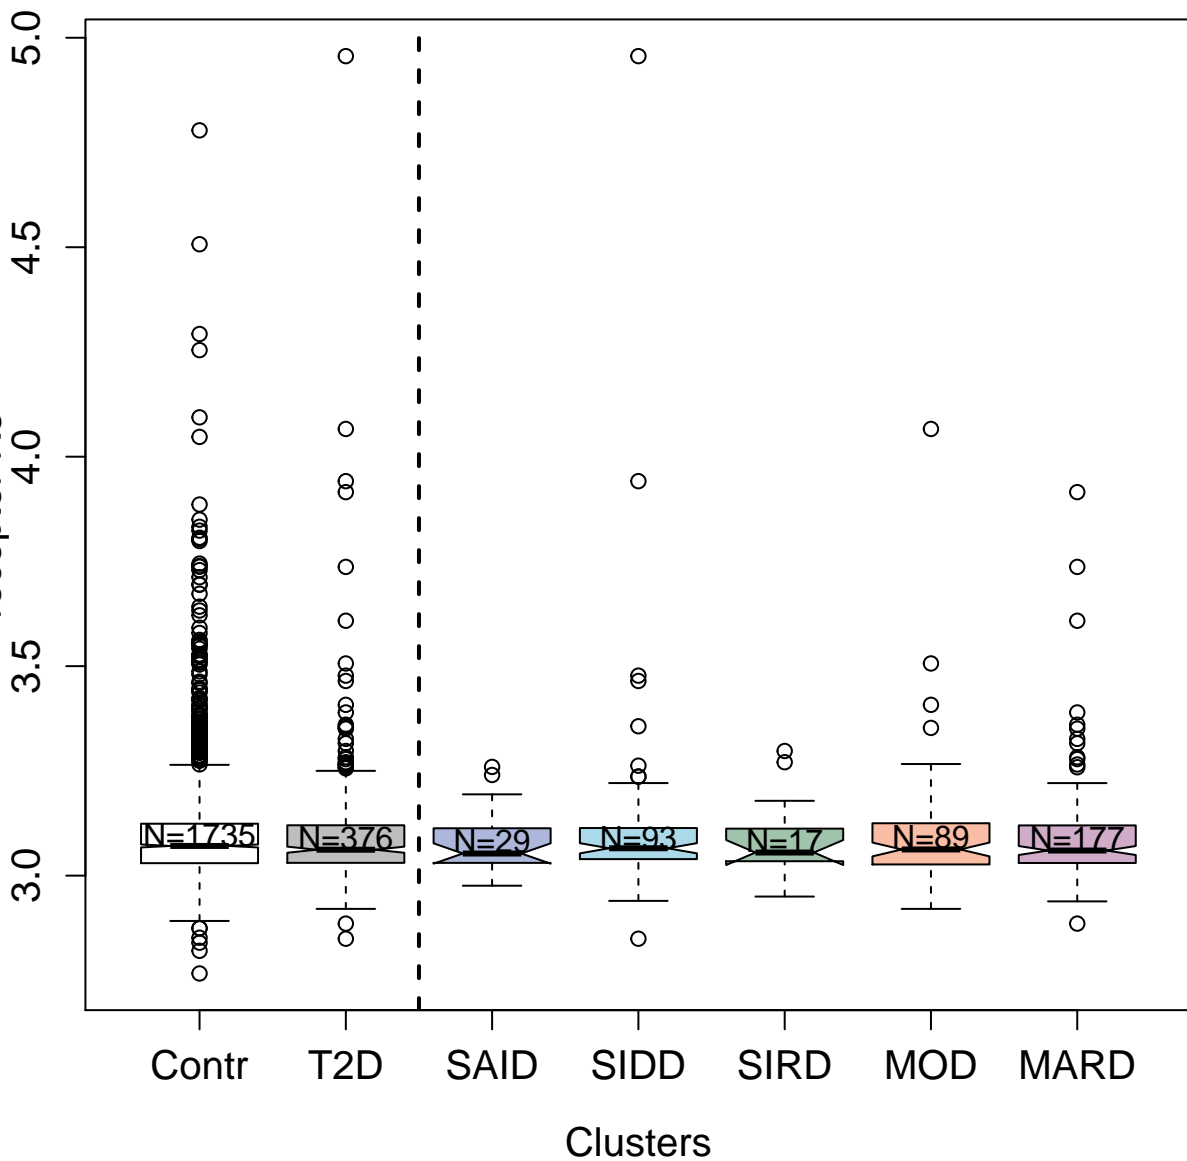

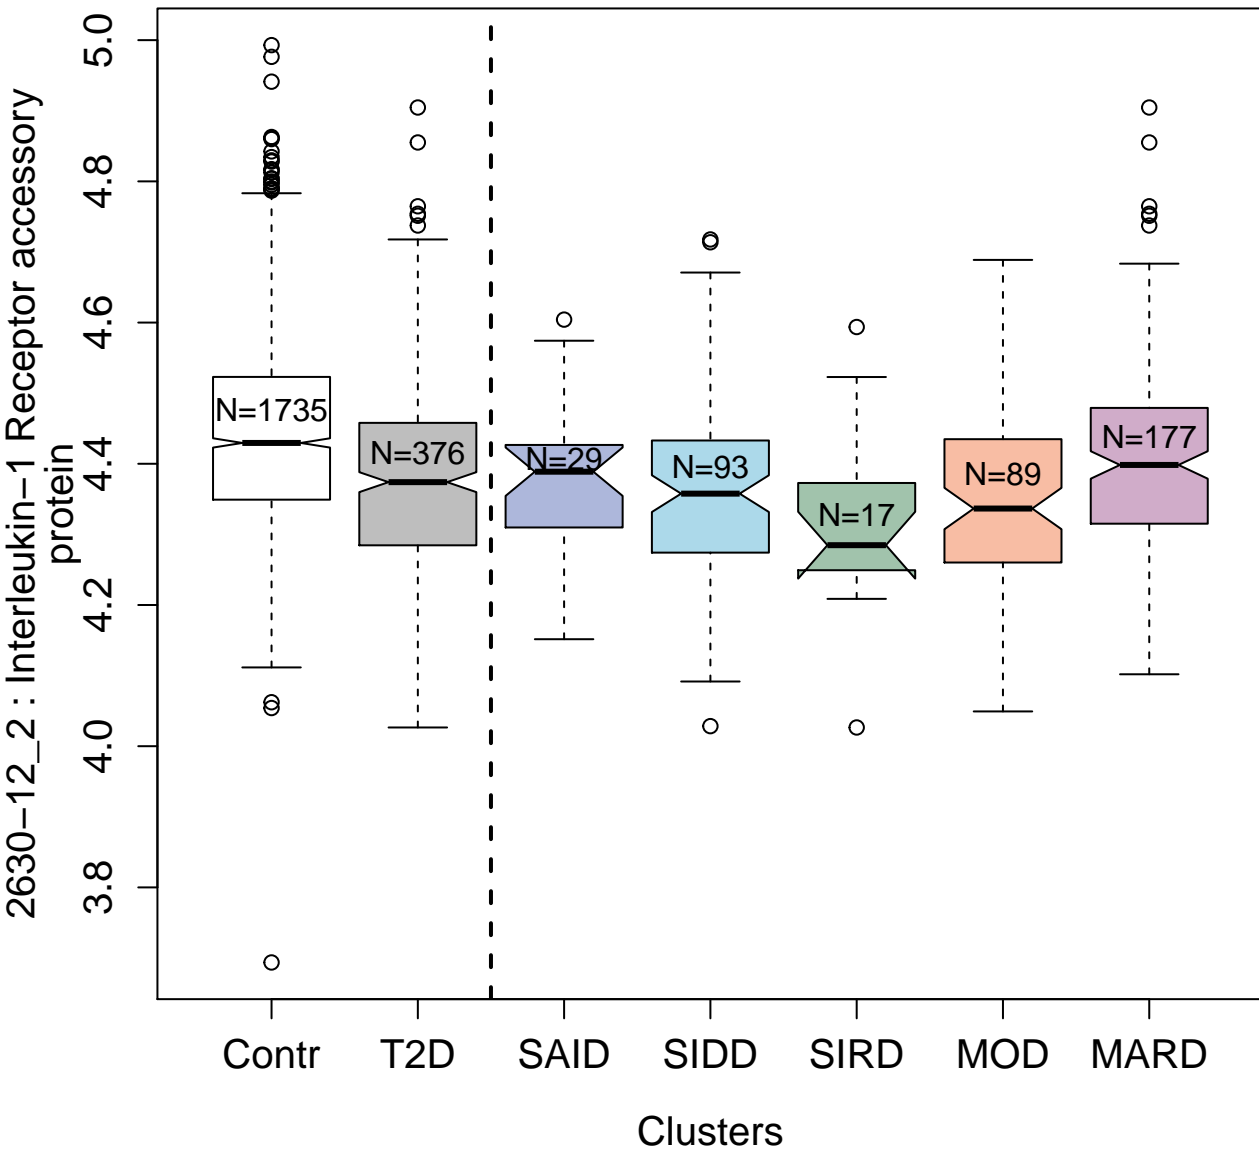

5107-7\_2 : Neurogenic locus notch homolog protein

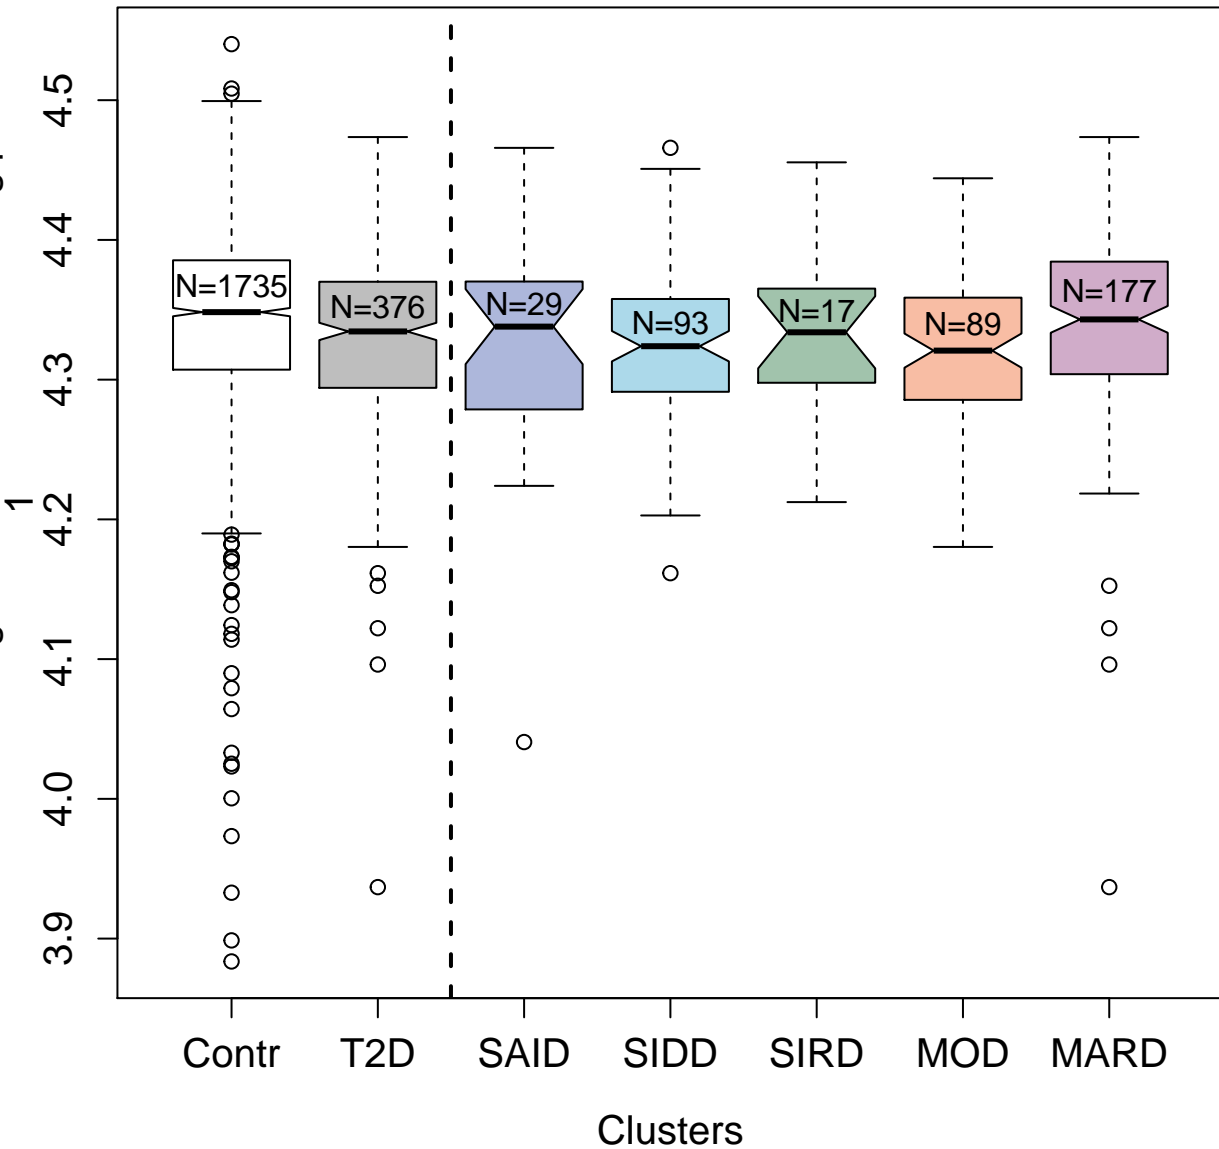

4910-21\_1 : Phospholipase A2

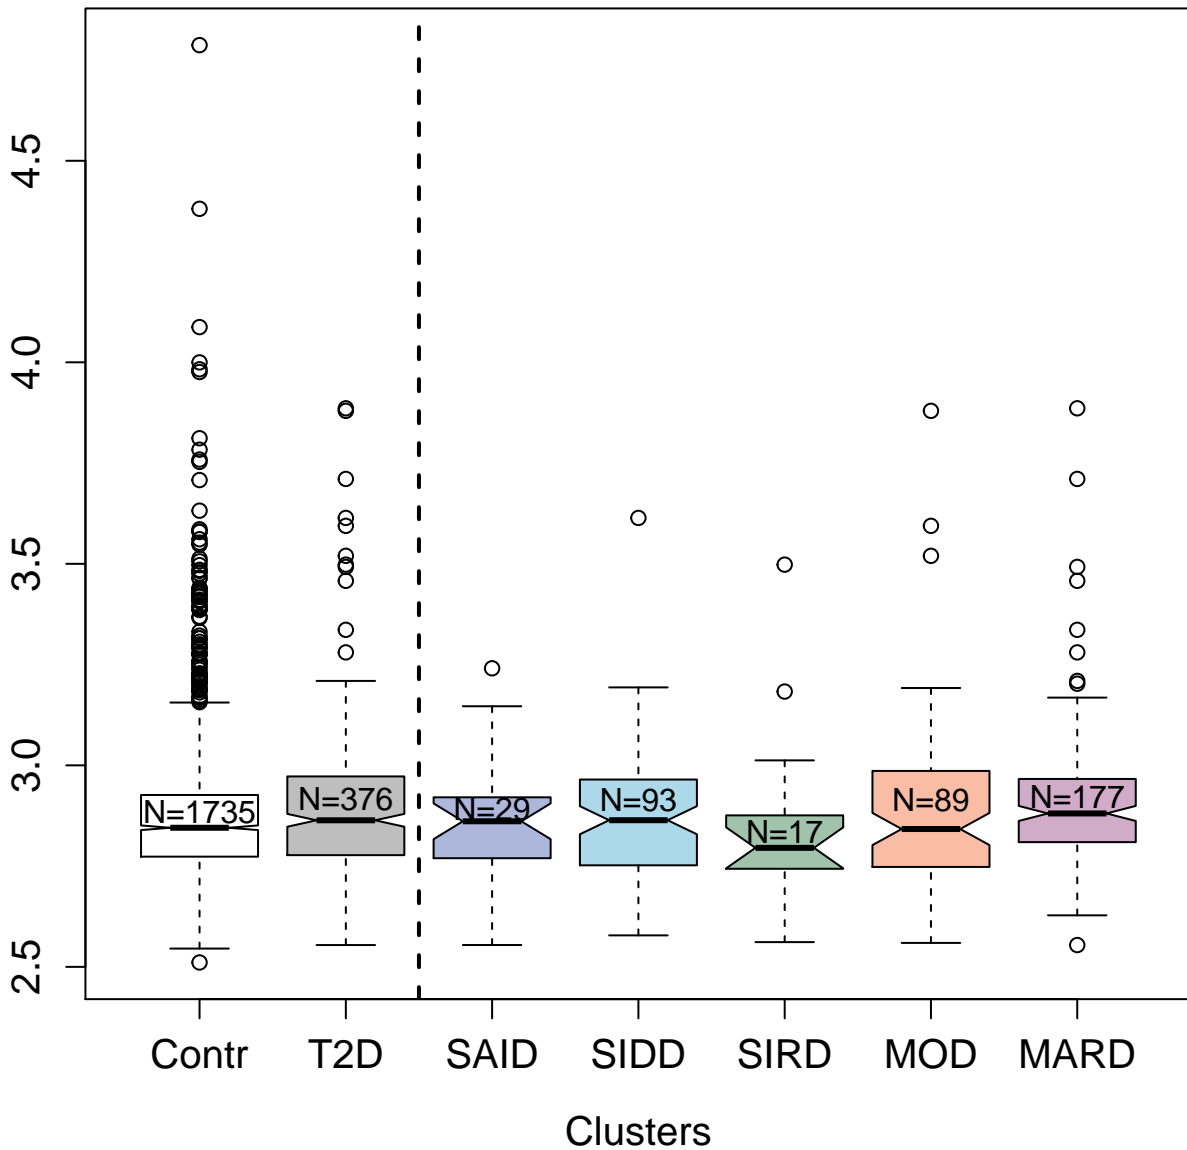

3853-56\_1 : Malate dehydrogenase; cytoplasmic

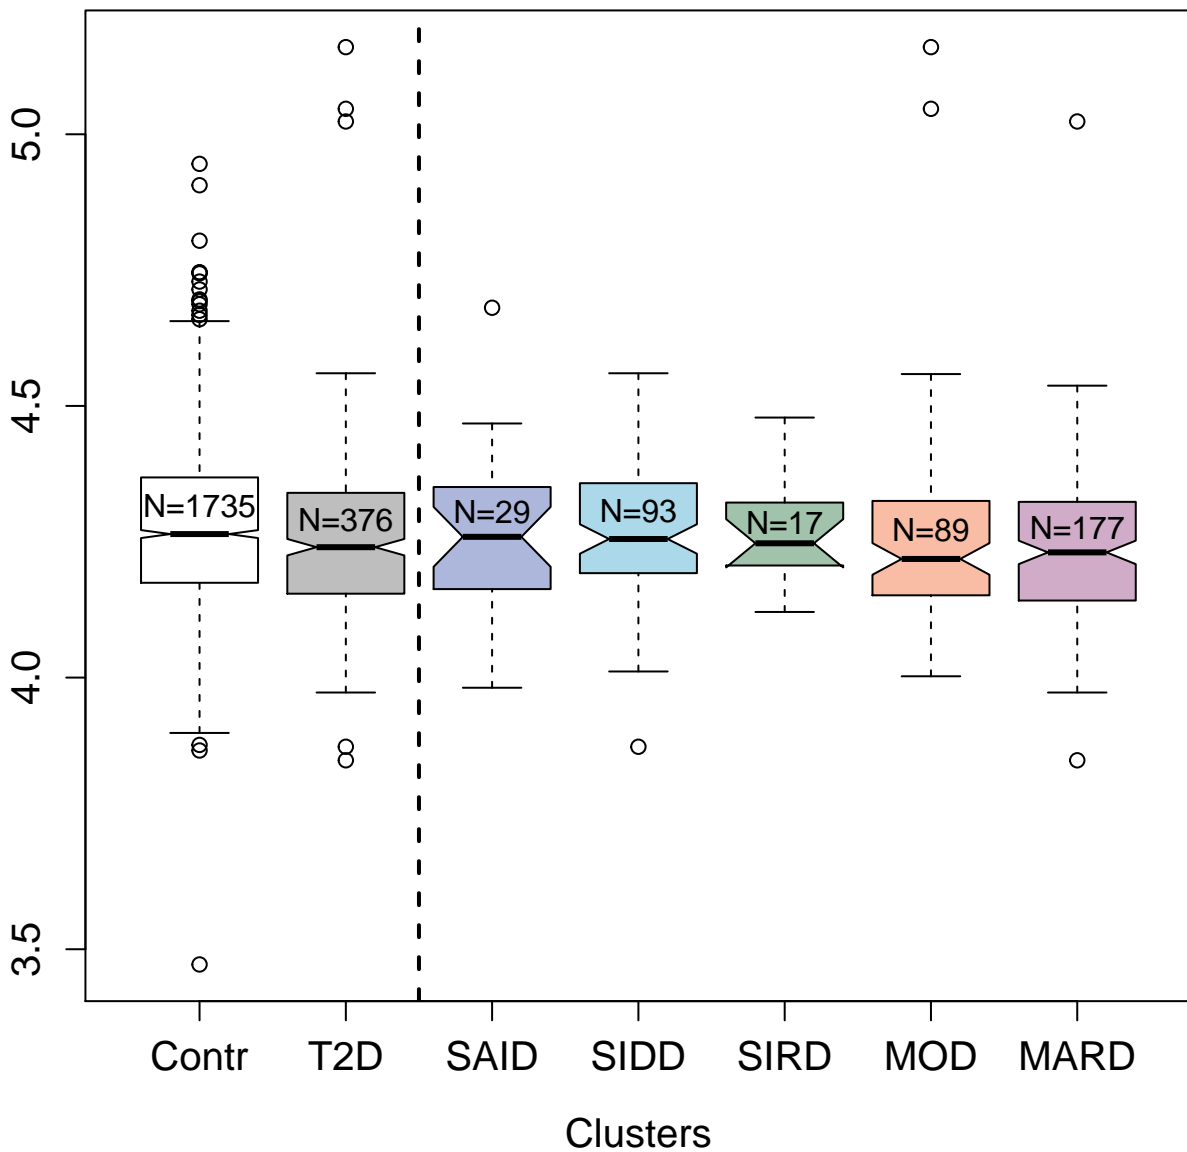

5315-22\_3 : Troponin T; cardiac muscle

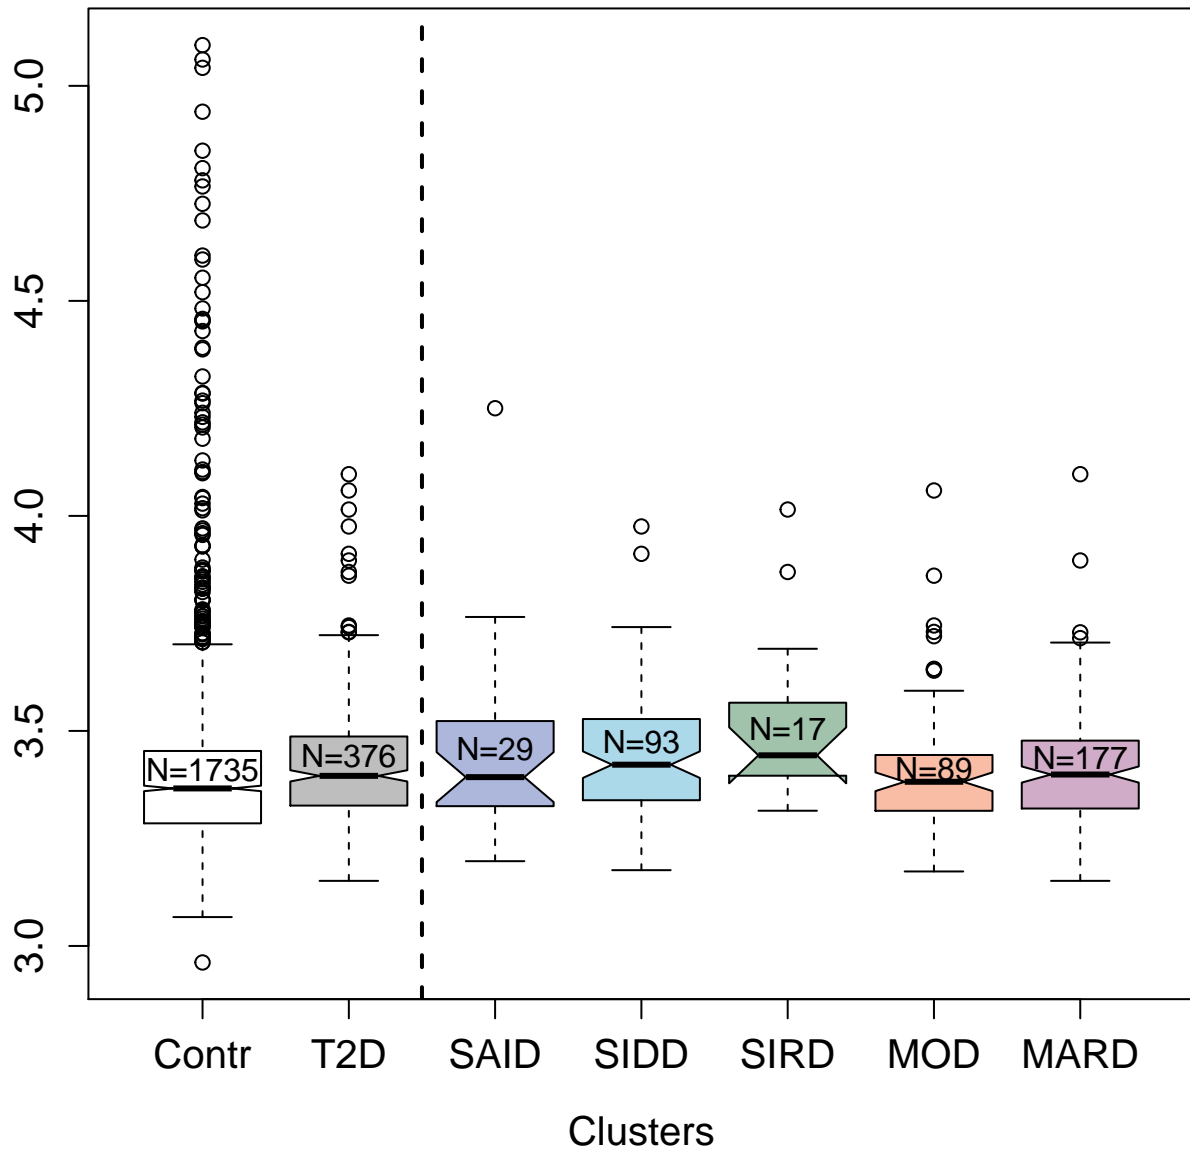



2823-7\_1 : COMM domain-containing protein 7

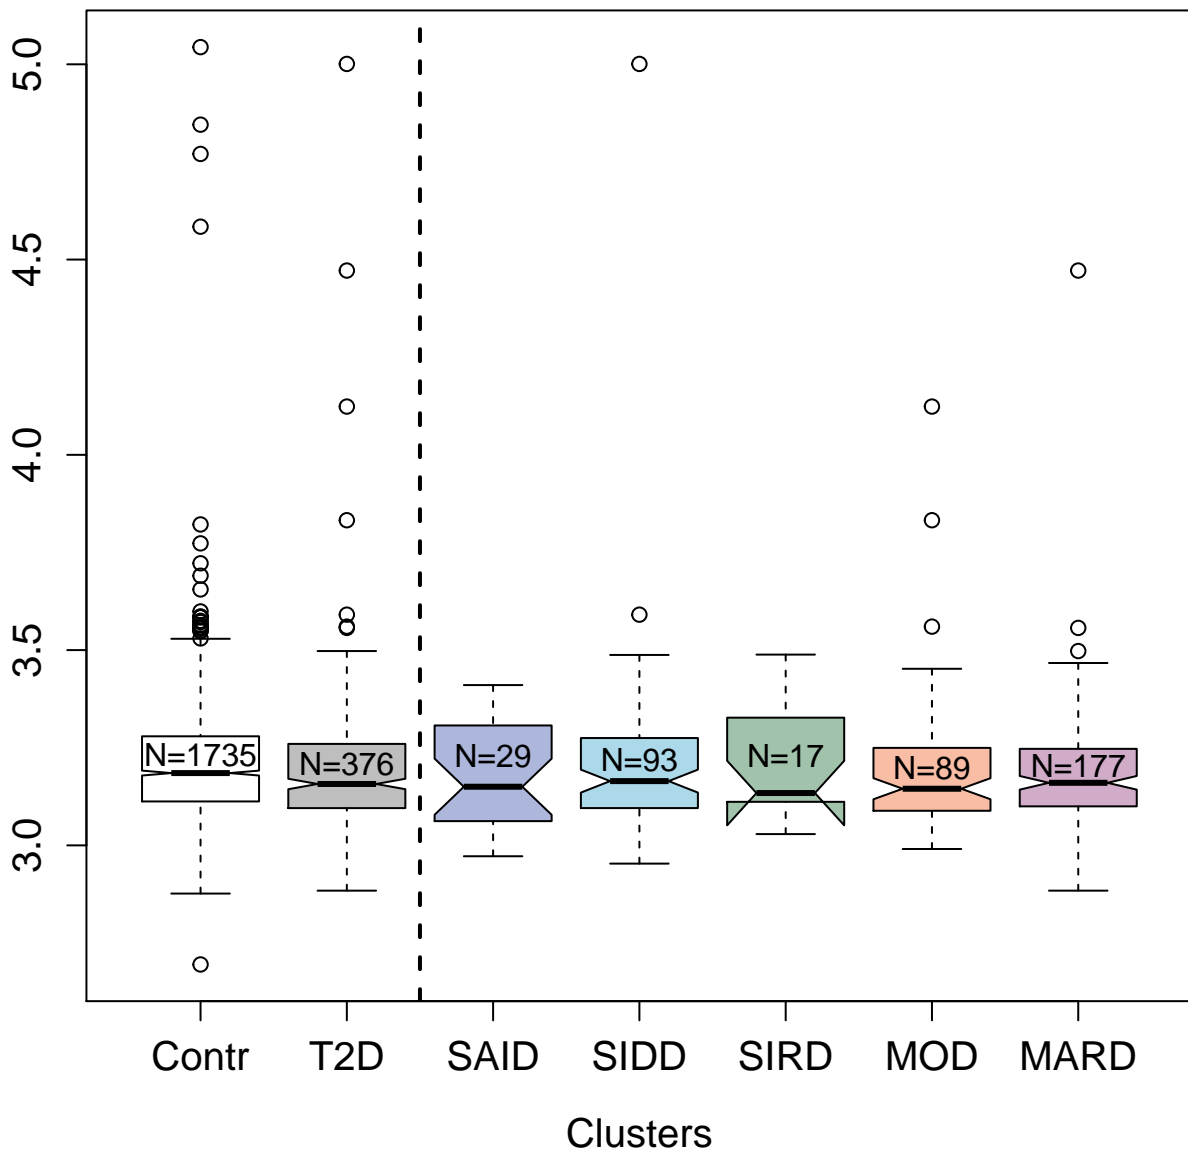

2875-15\_2 : TATA-box-binding protein

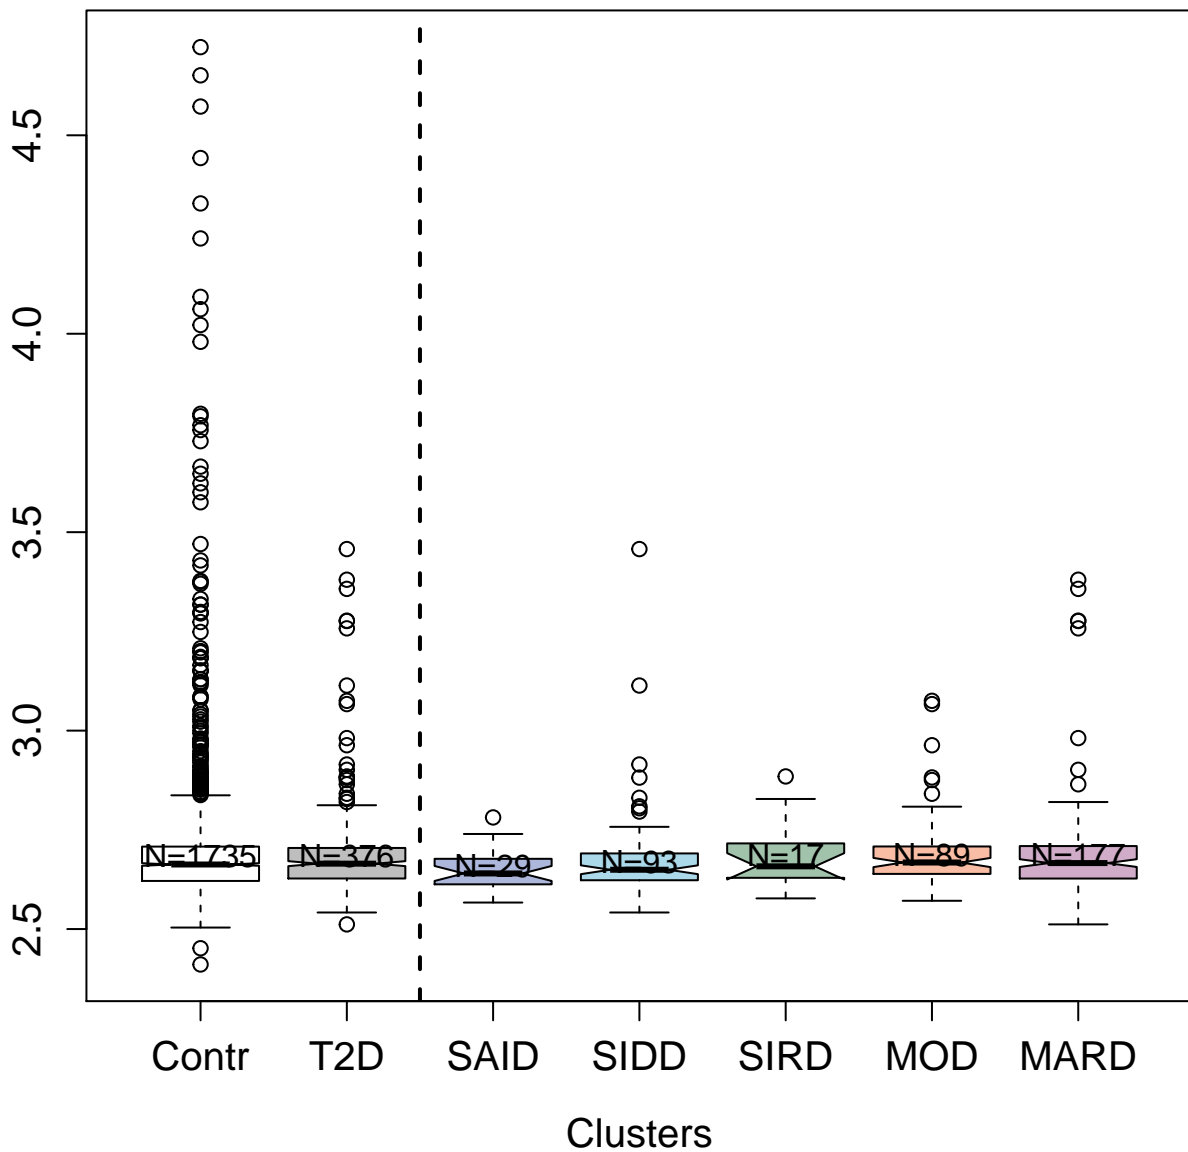

13131-5\_3 : Hexokinase-1

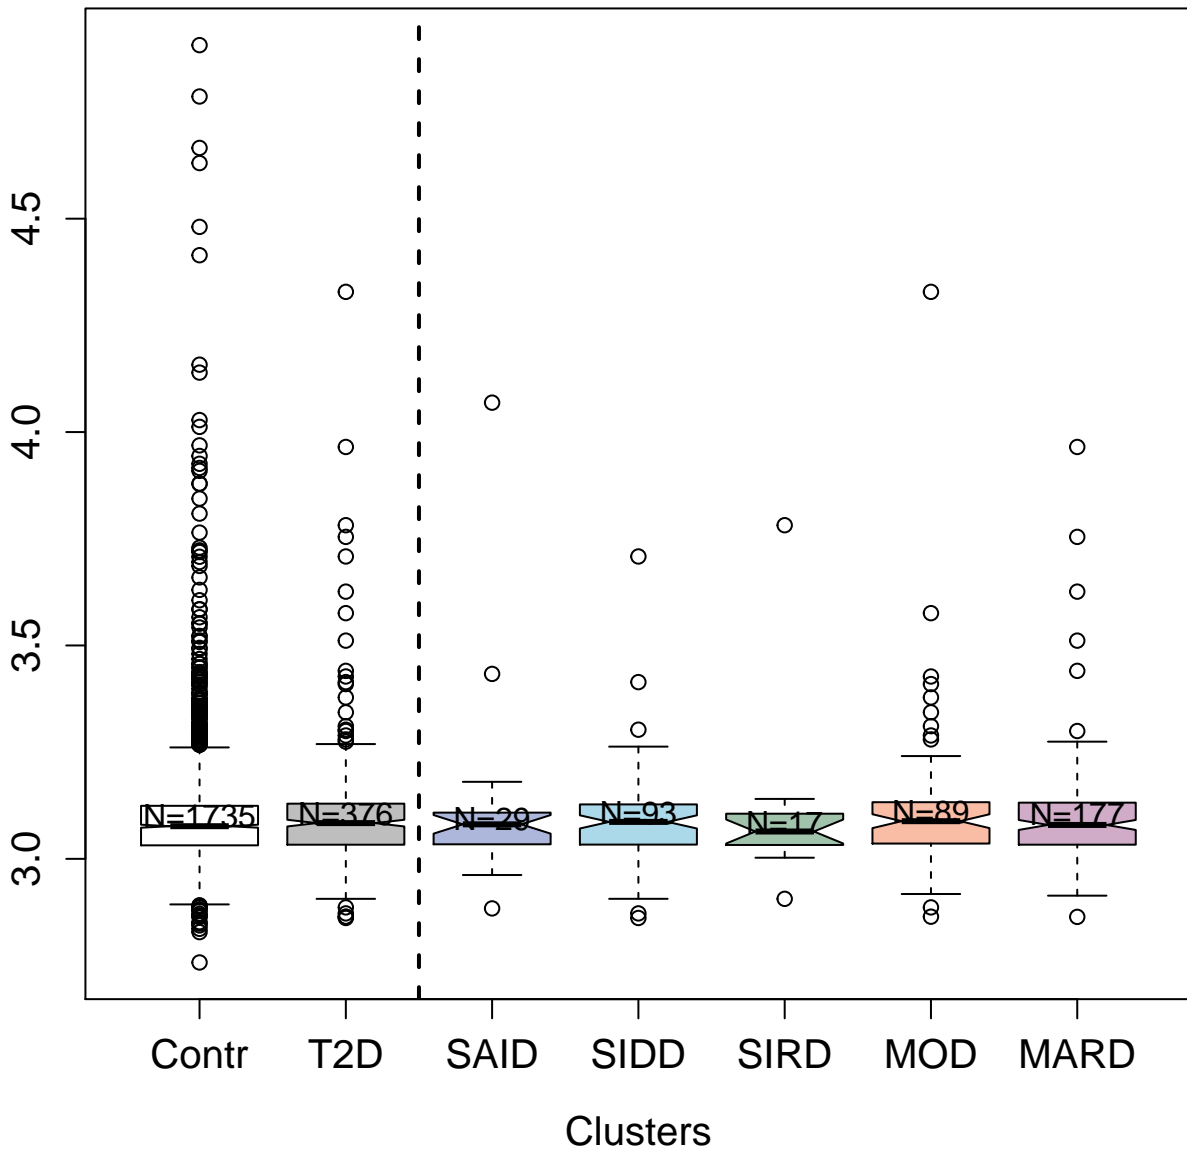

3344-60\_4 : Antithrombin-III

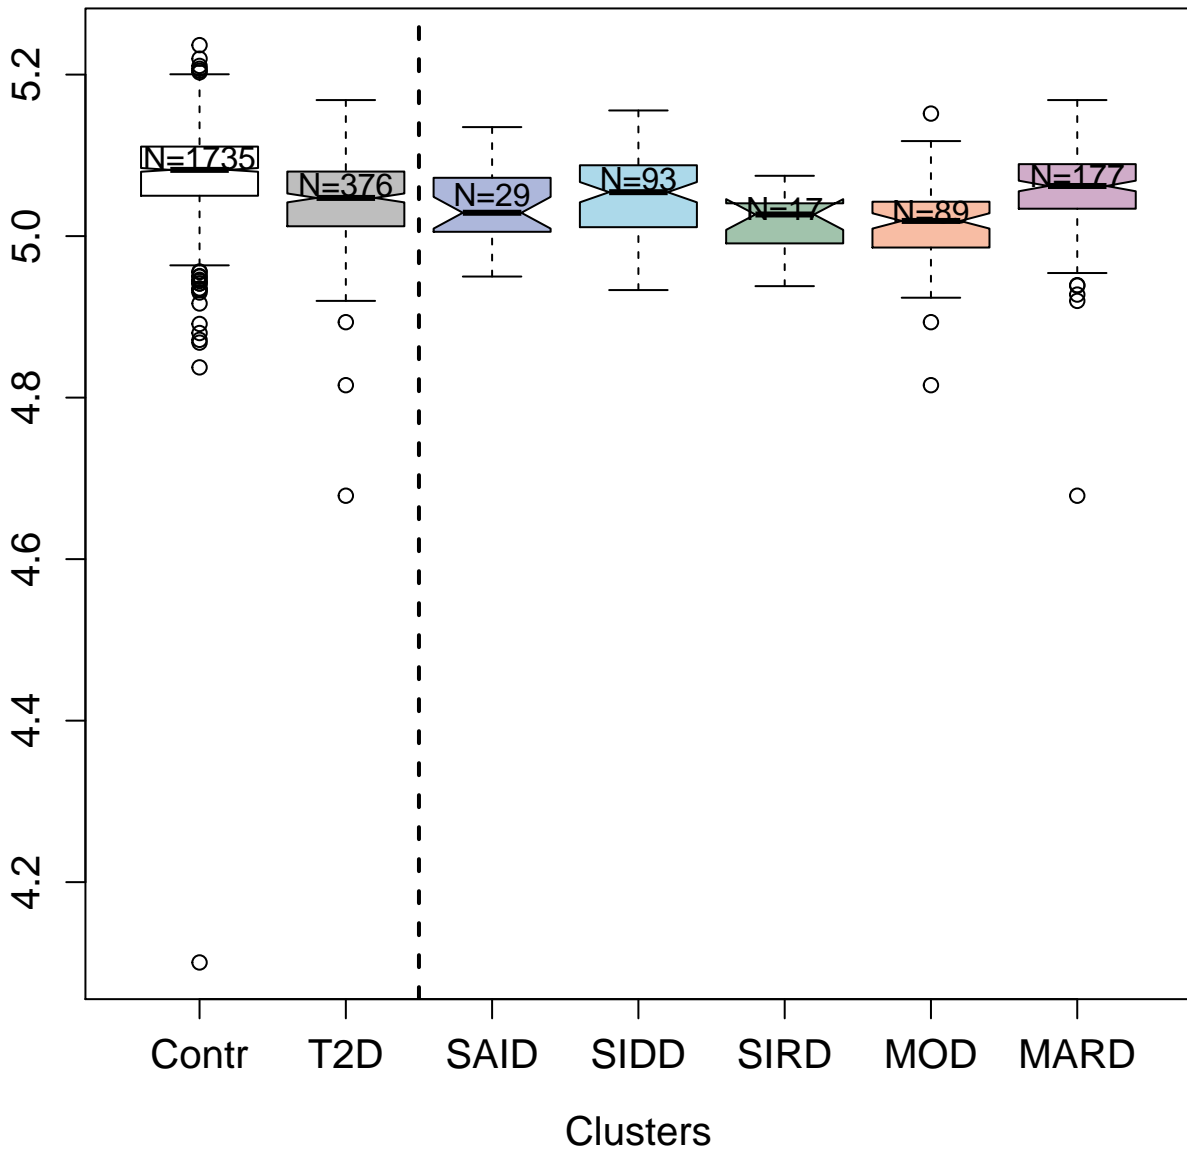

13103-125\_3 : Chorionic somatomammotropin hormone

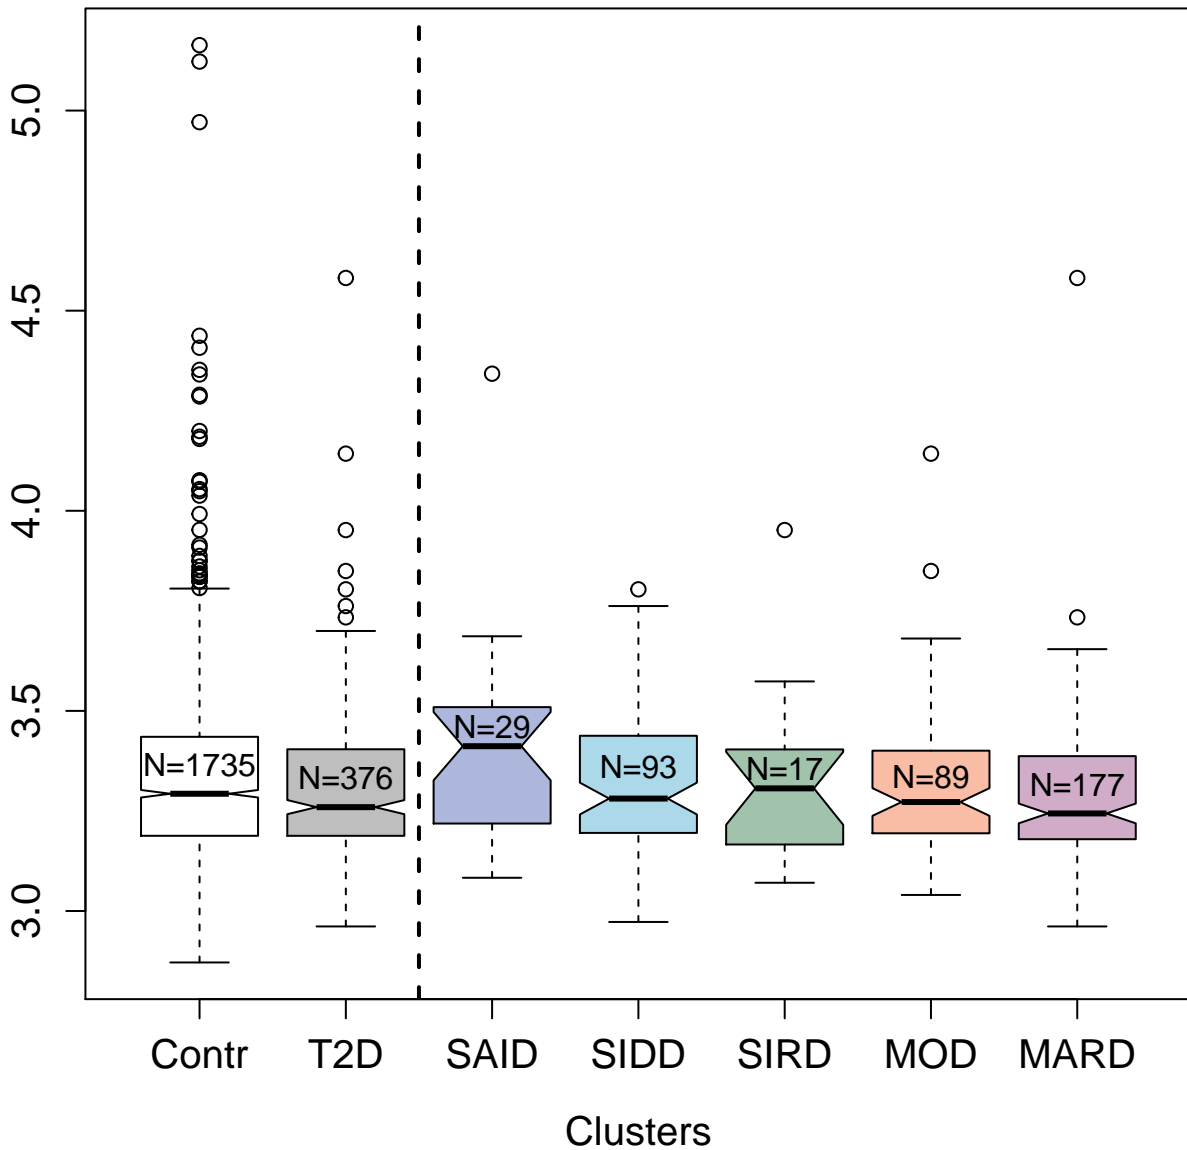

3037-62\_1 : Interleukin-1 beta

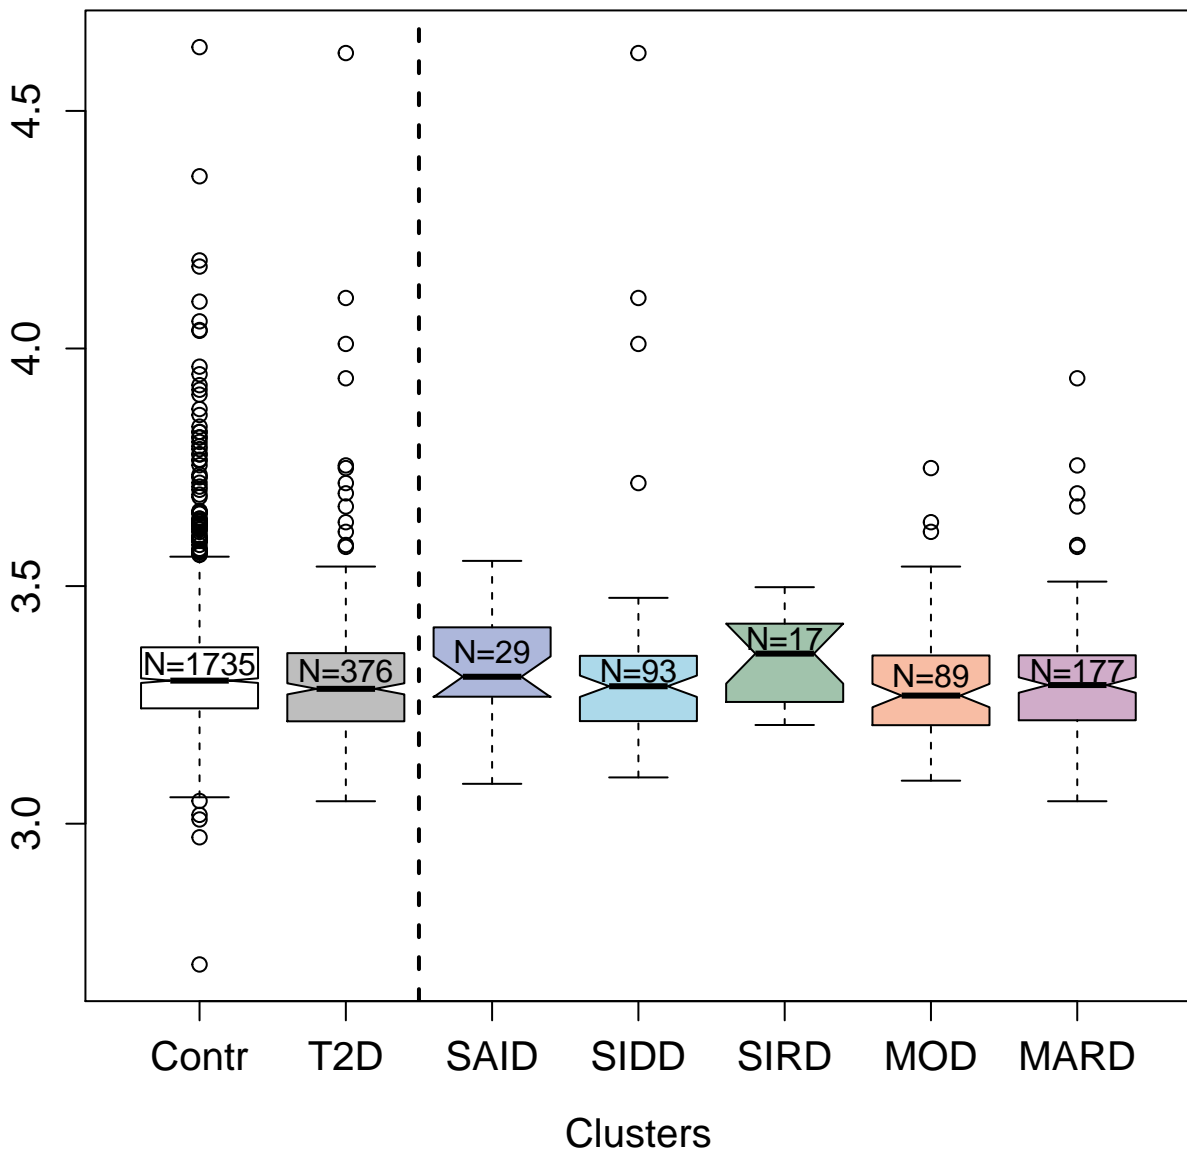

13104-32\_3 : Ephrin-B1

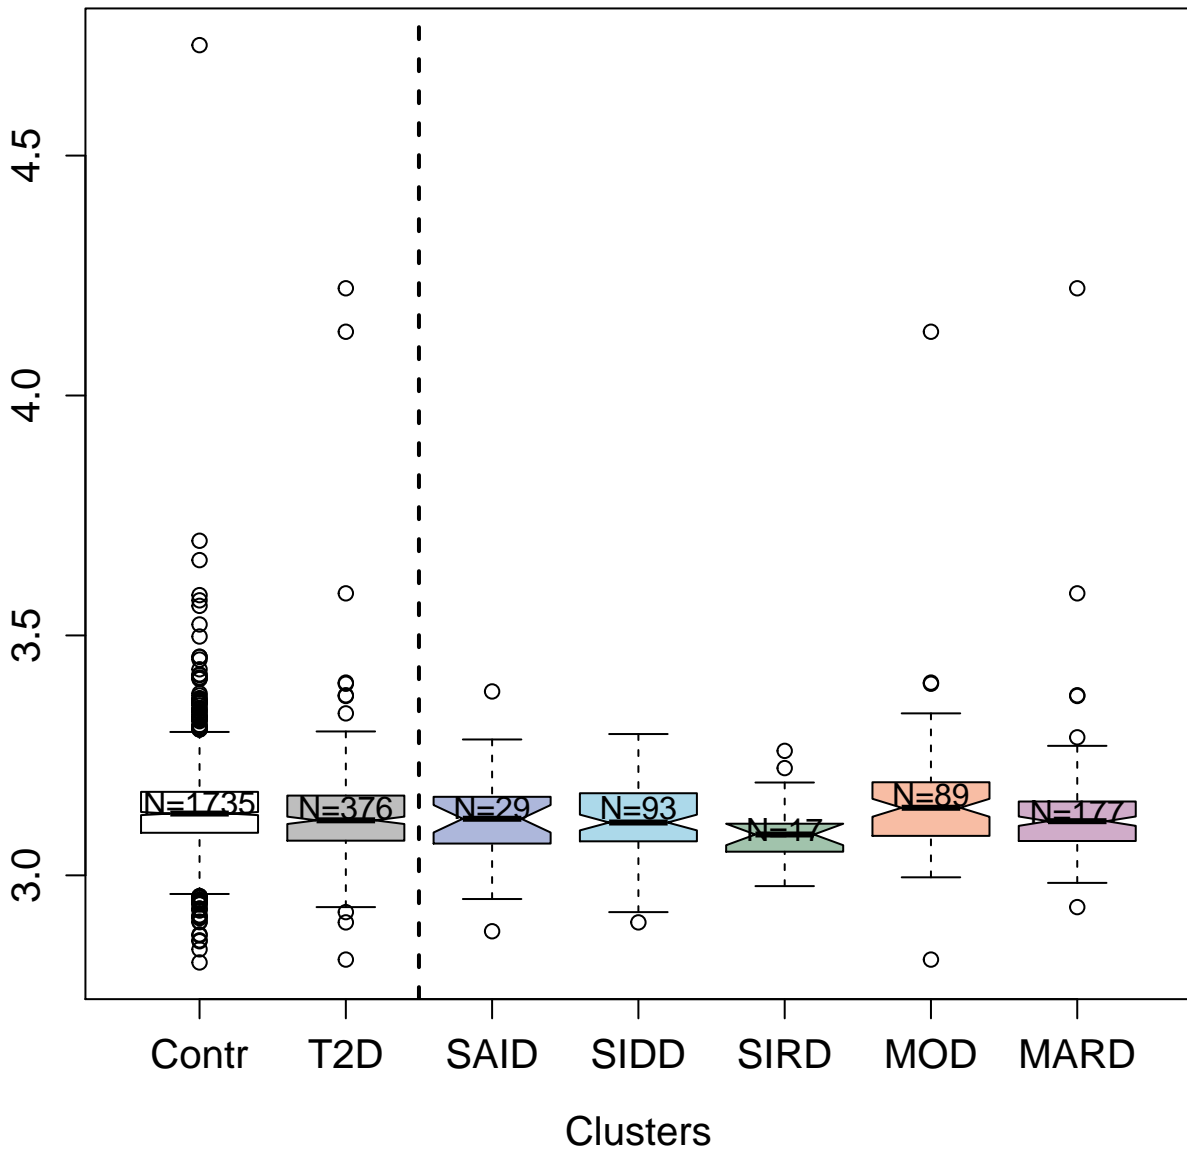

## 5249-31\_3 : Serine/threonine-protein kinase 17B

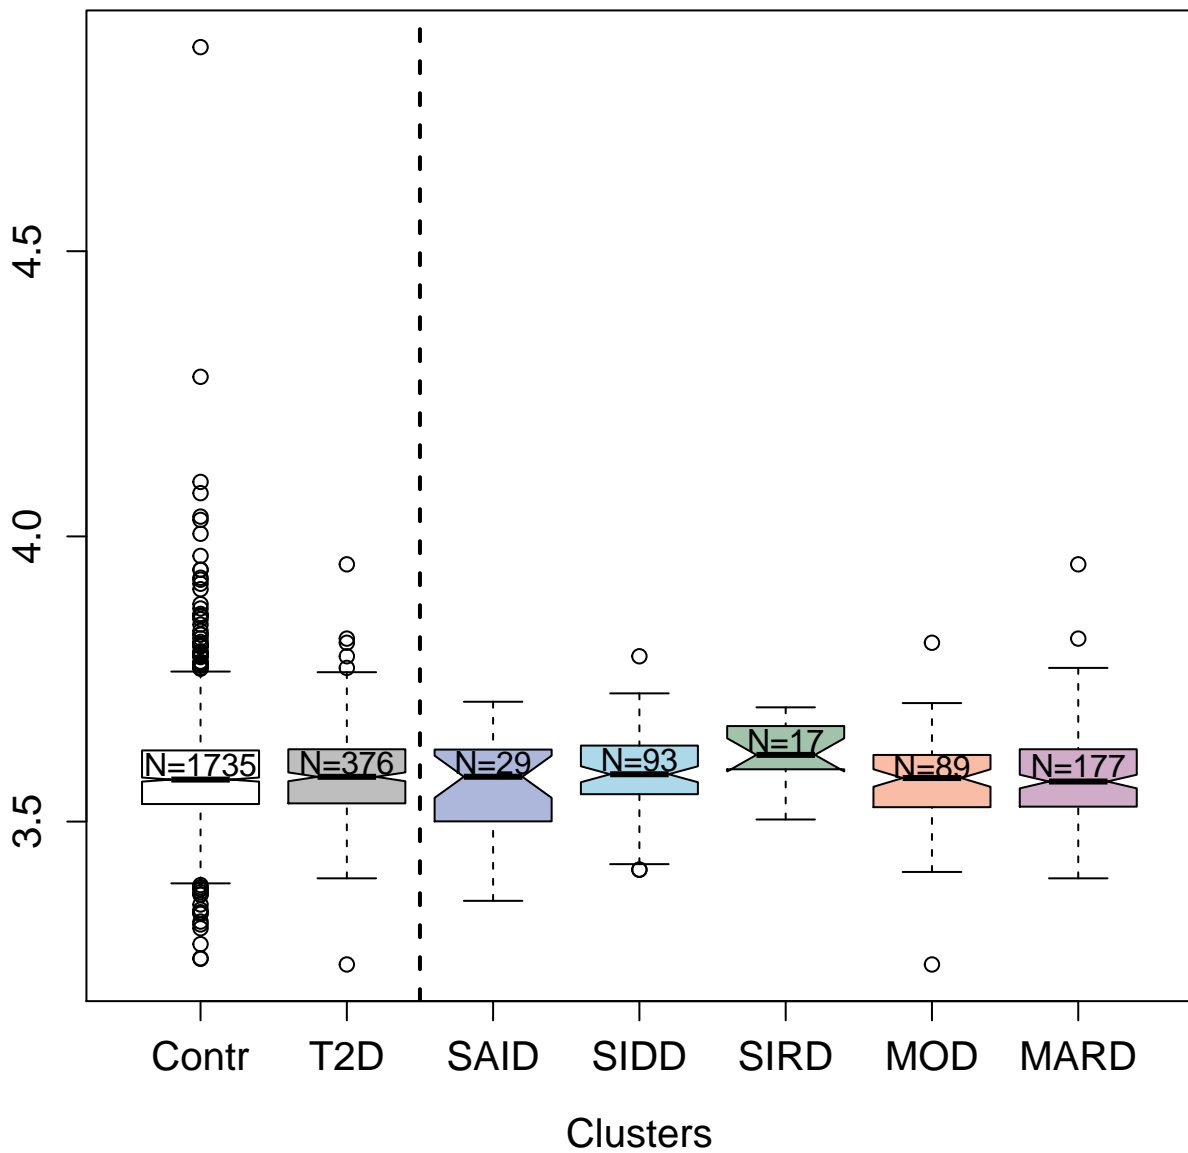



3469-74\_1 : Ribosomal protein S6 kinase alpha-3

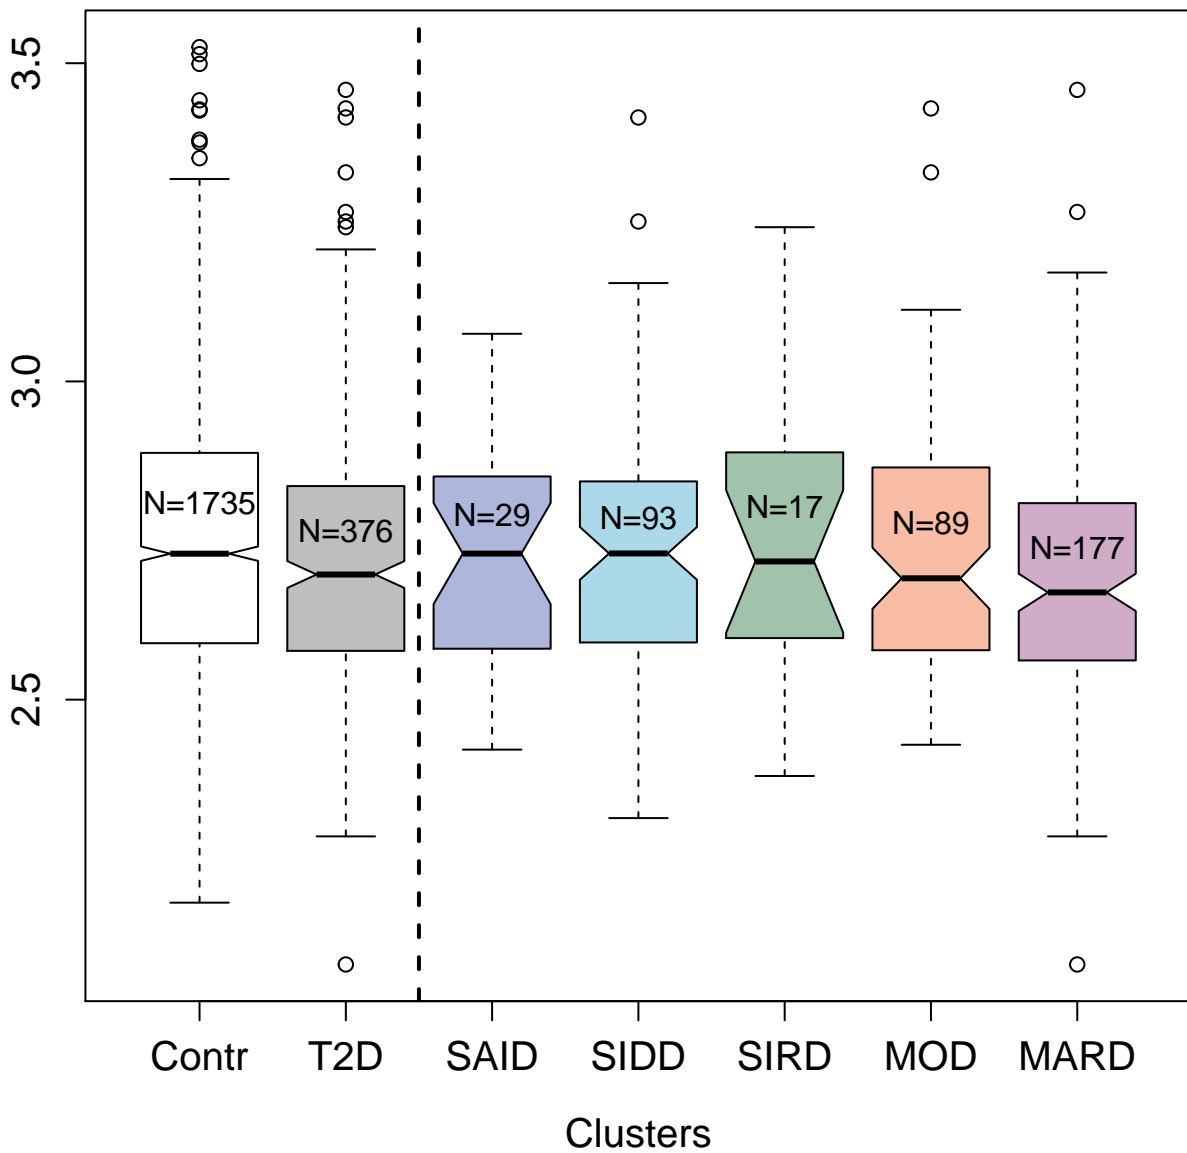

4420-7\_2 : Disintegrin and metalloproteinase domain-containing protein 12

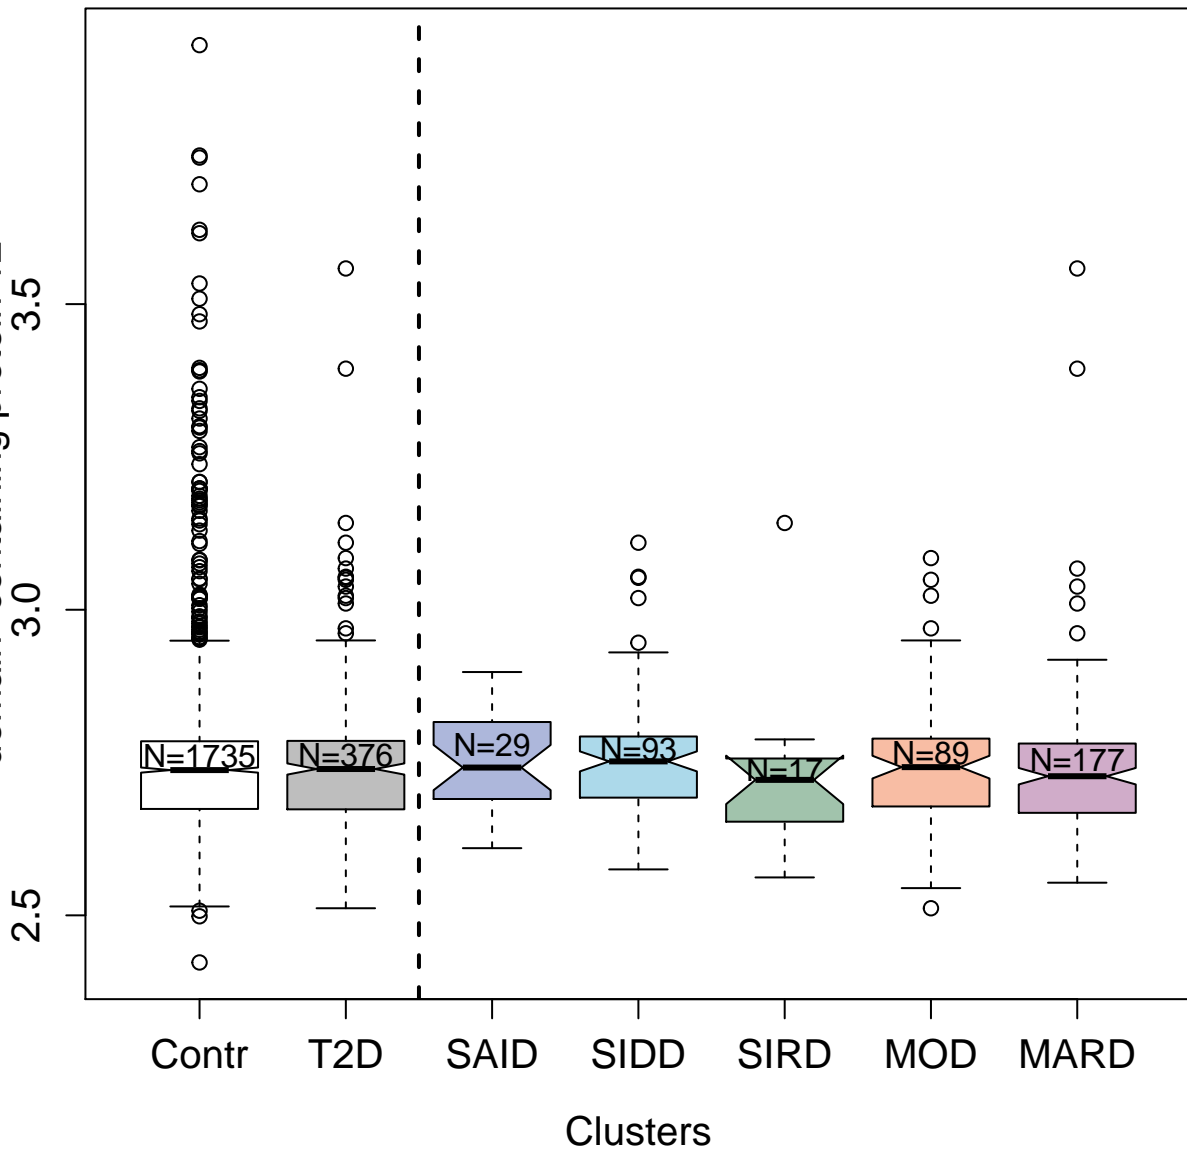

3038-9\_2 : C-X-C motif chemokine 11

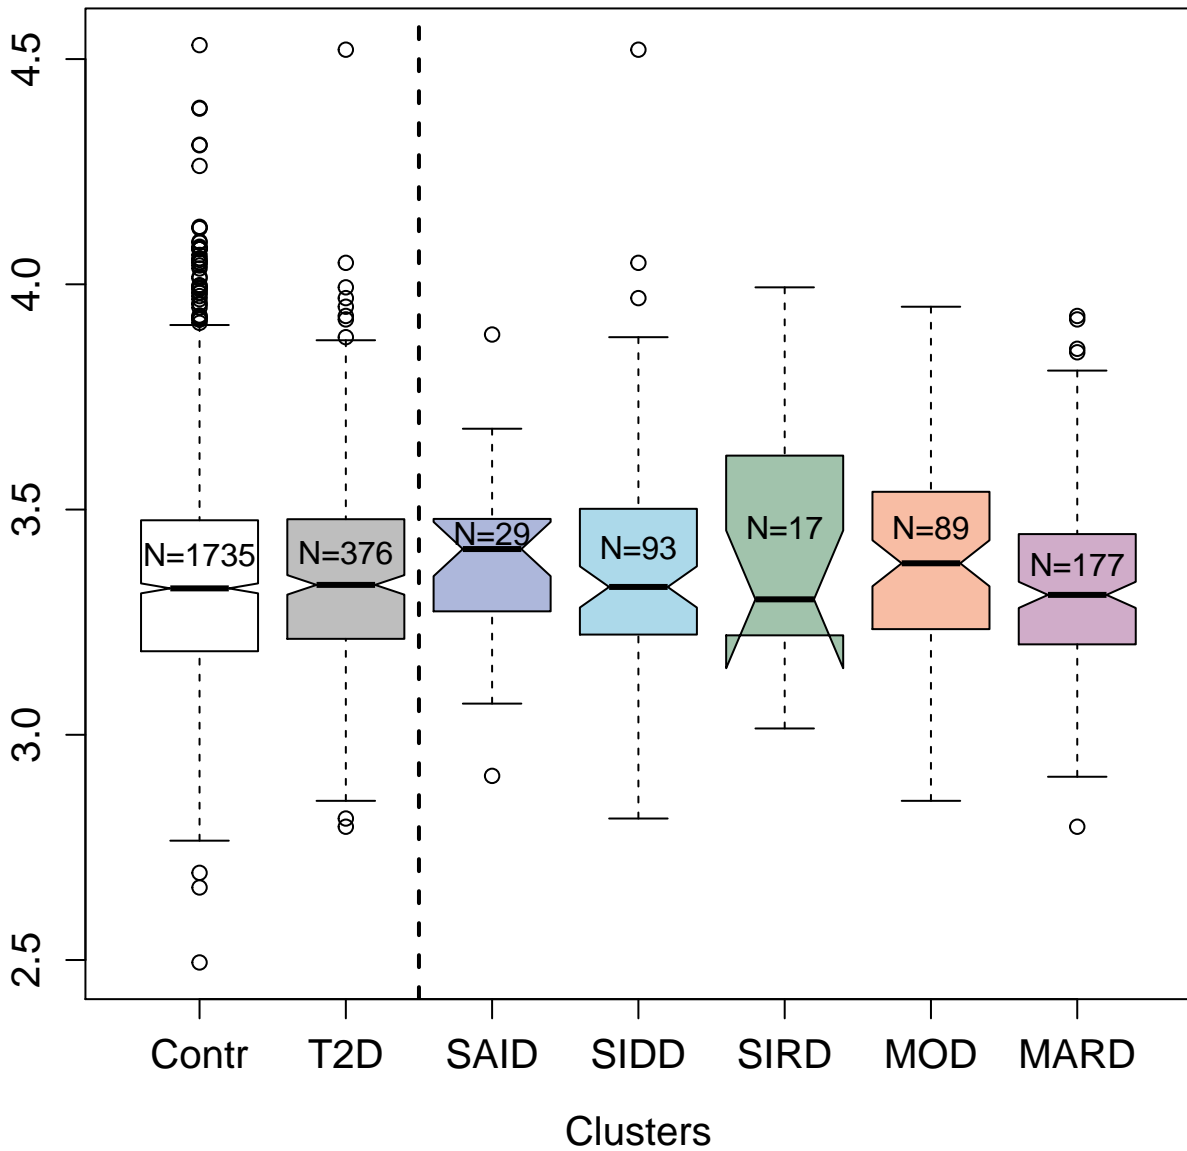

2714-78\_2 : Endothelial monocyte-activating polypeptide 2

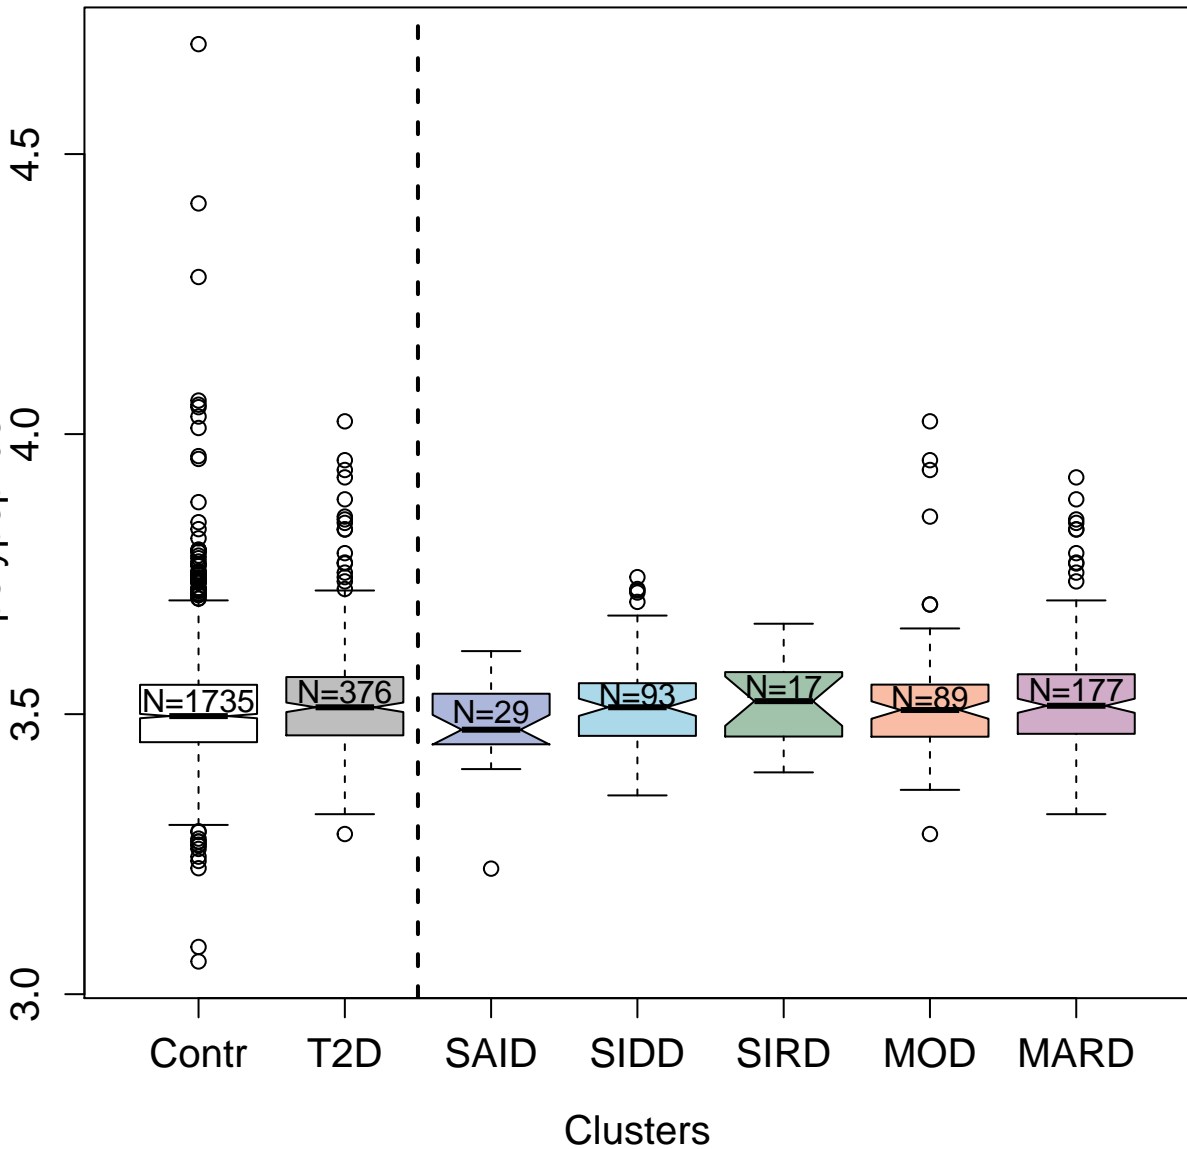

2939-10\_2 : Artemin

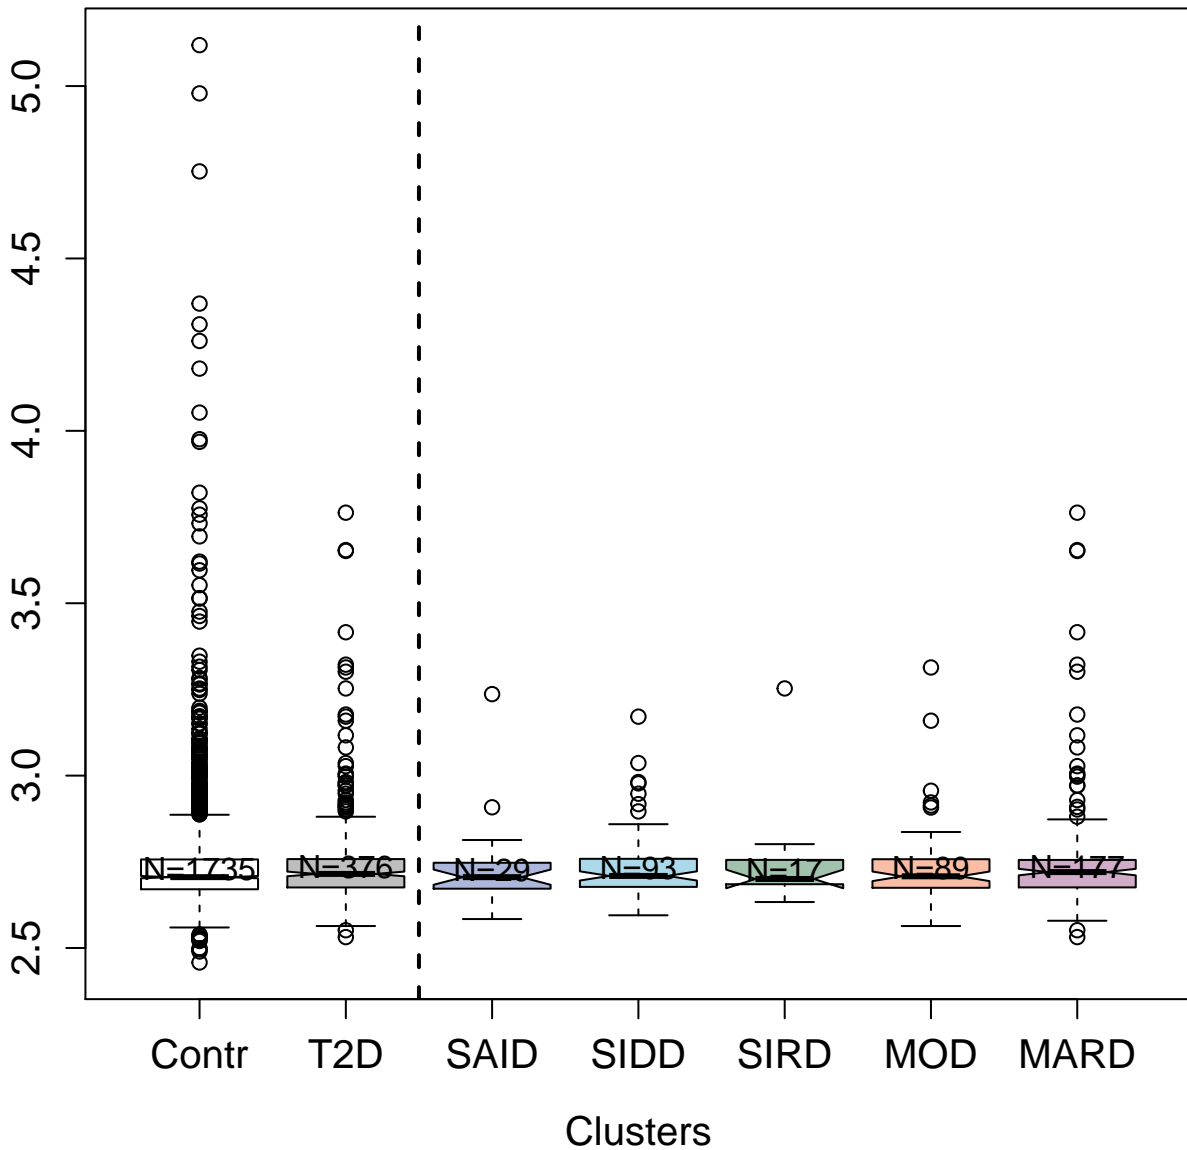

3132-1\_1 : Vascular endothelial growth factor C

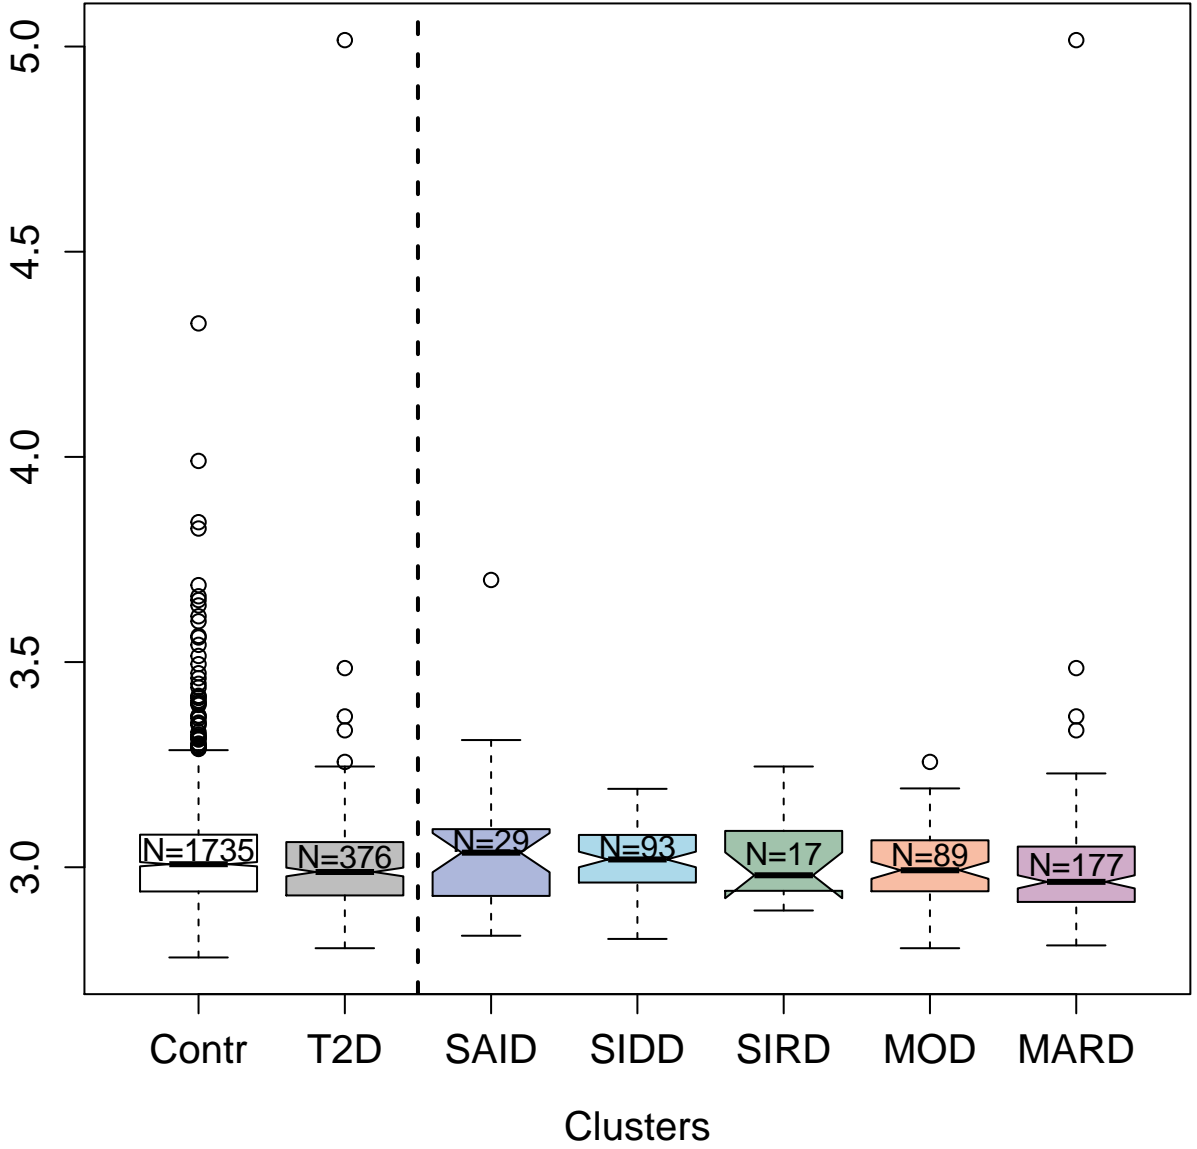

9190-7\_3 : CD63 antigen

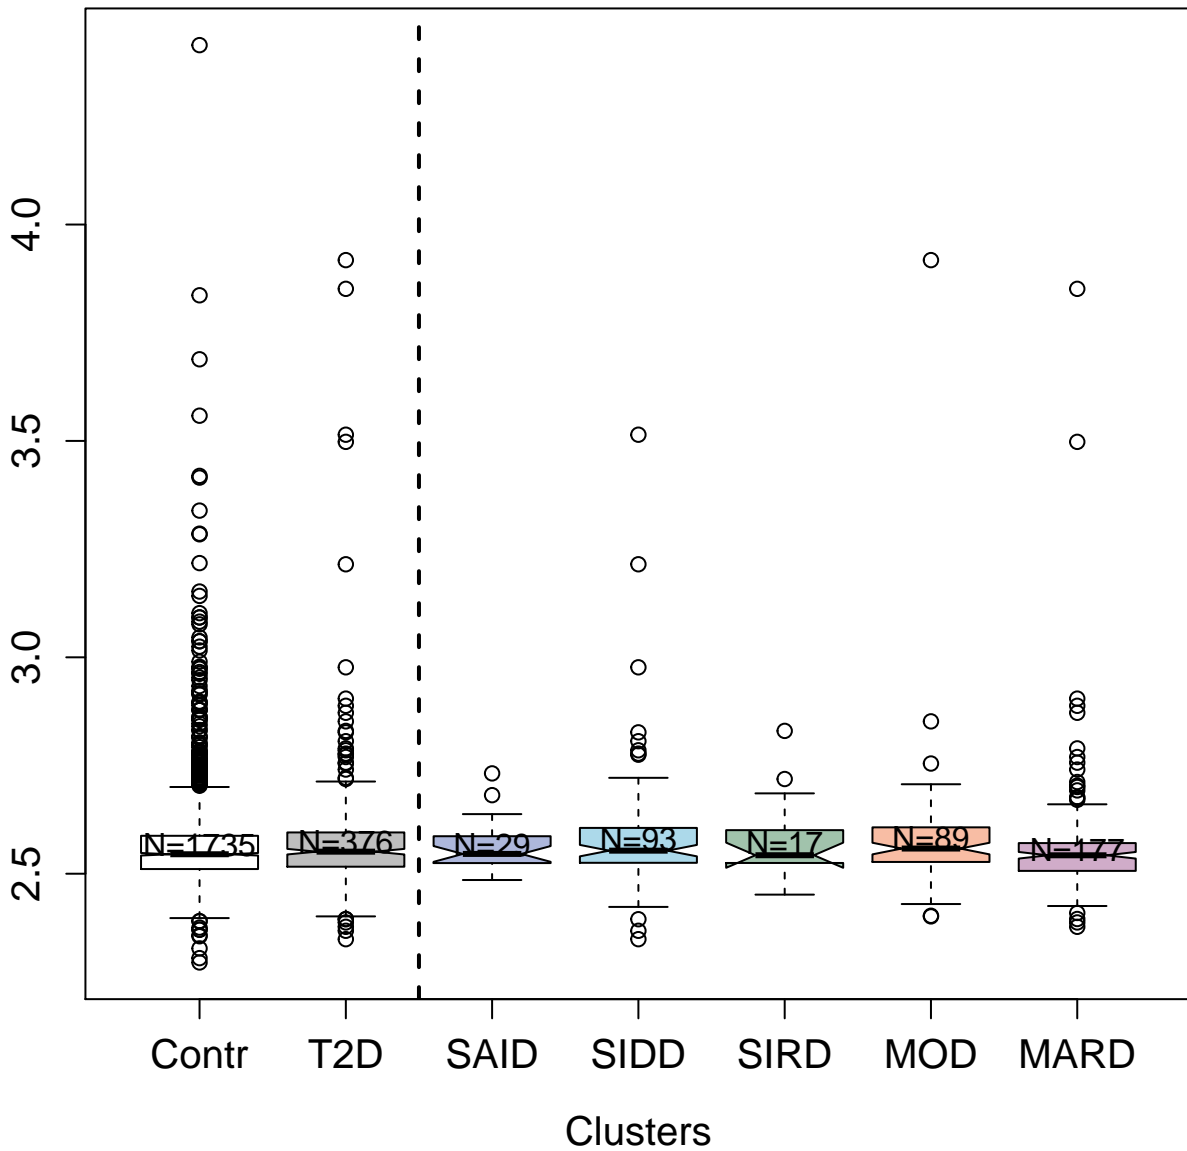

3292-75\_1 : CD48 antigen

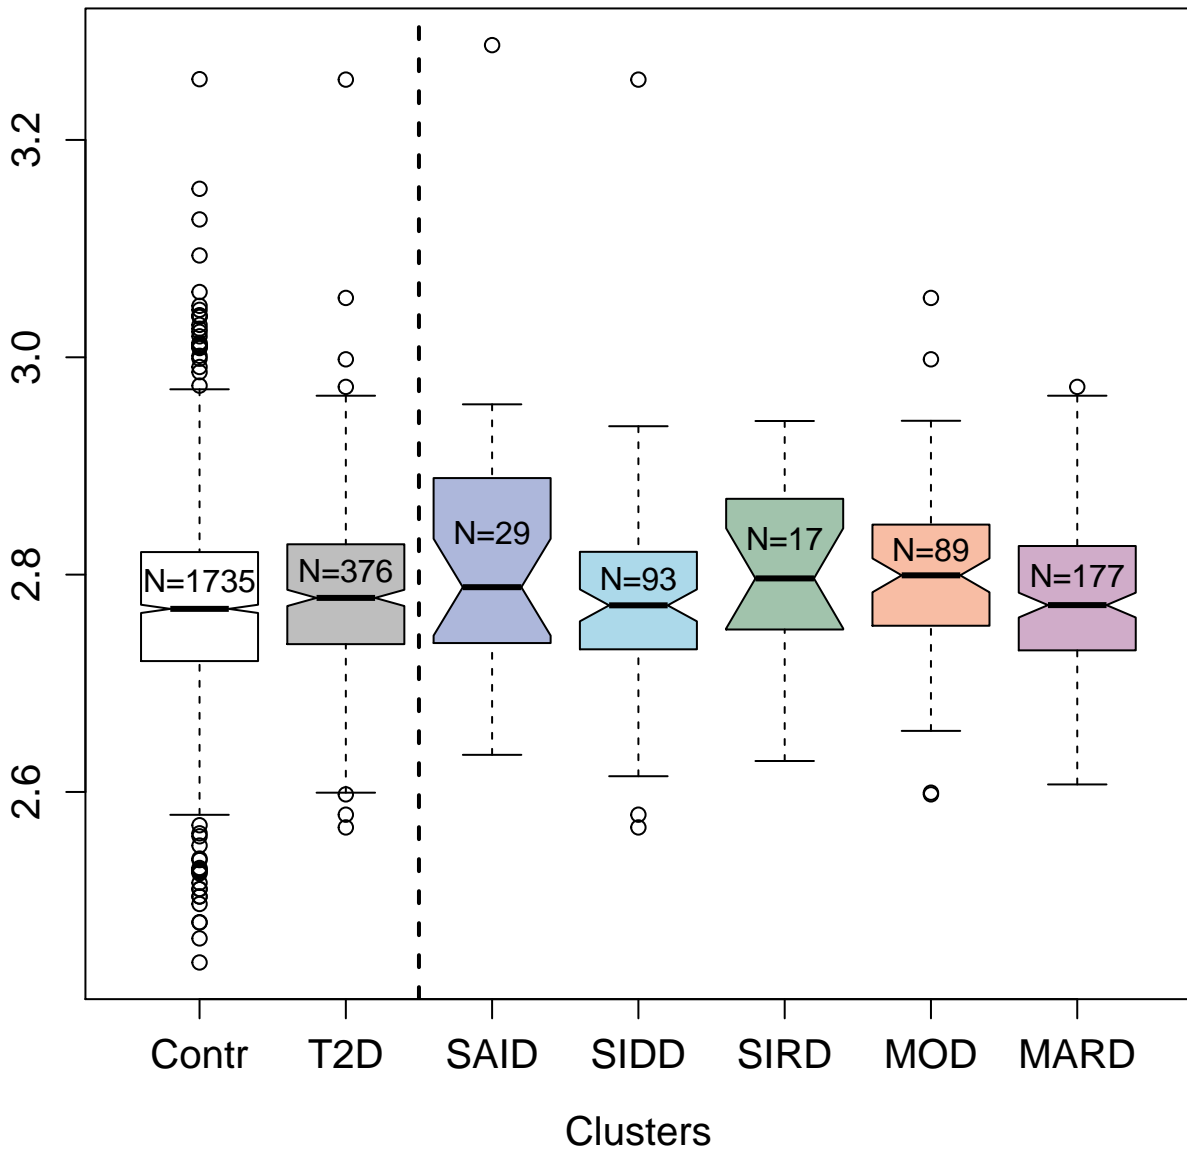



4807-13\_3 : Collagen alpha-1(VIII) chain

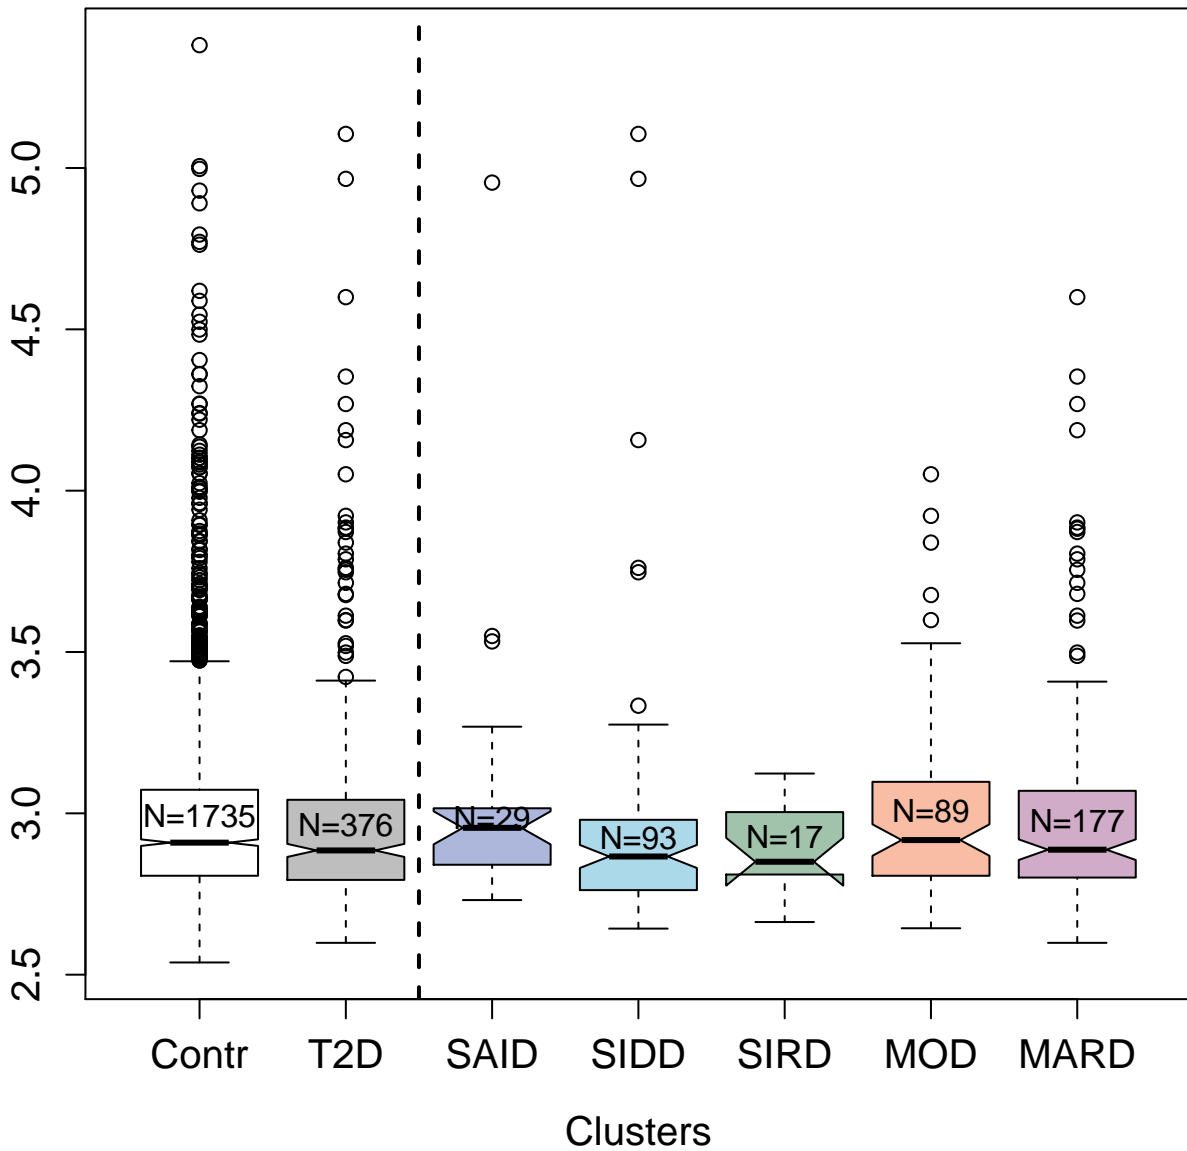

3809-1\_2 : Fibroblast growth factor receptor 3

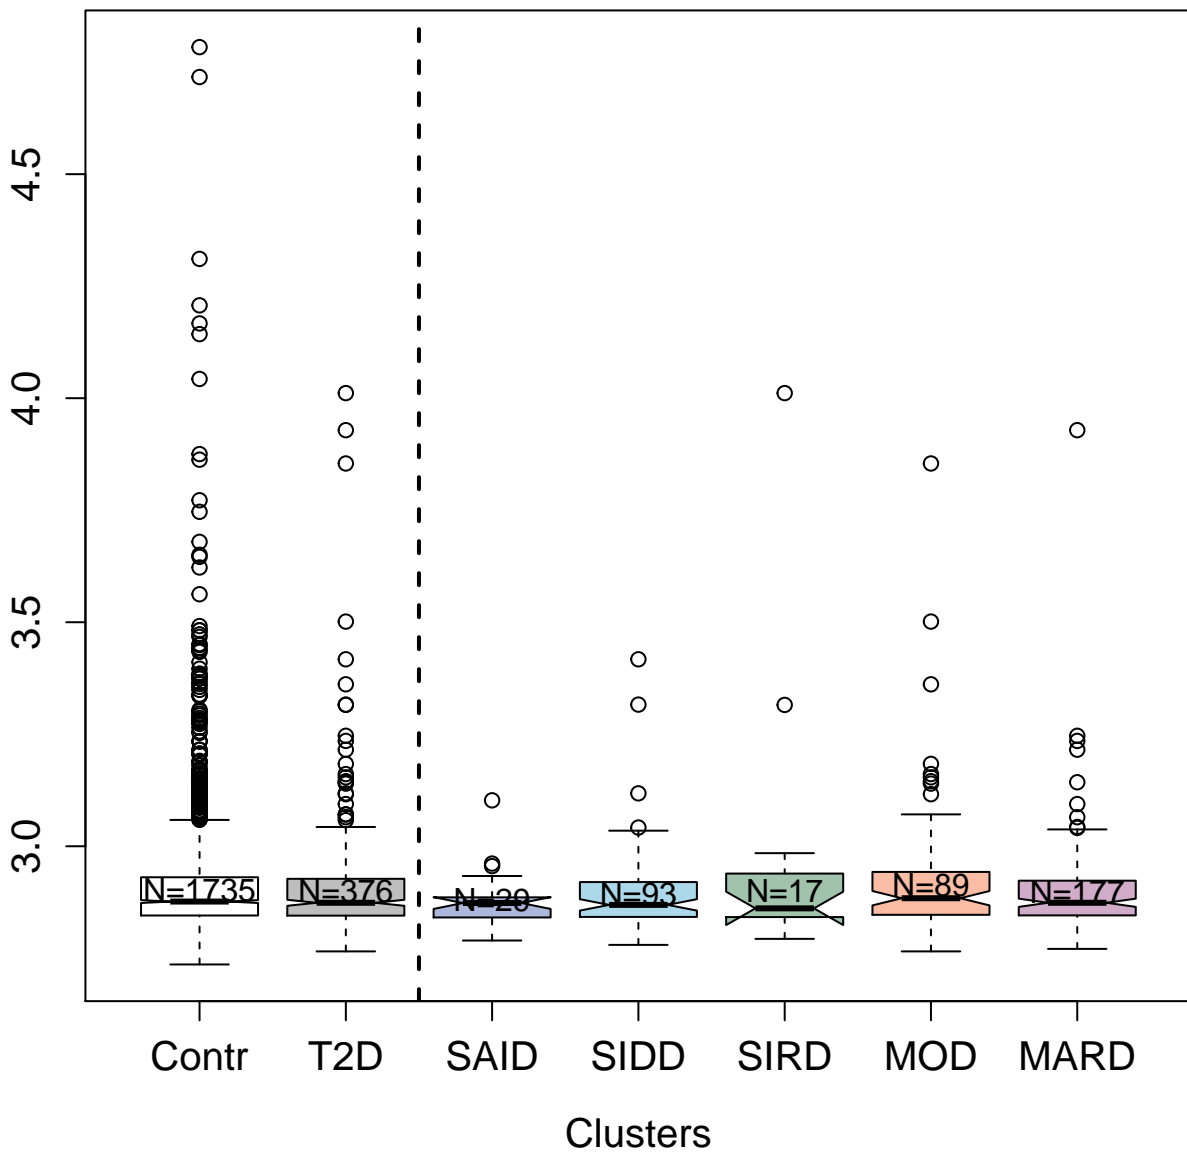

3055-54\_2 : Interleukin-4 receptor subunit alpha

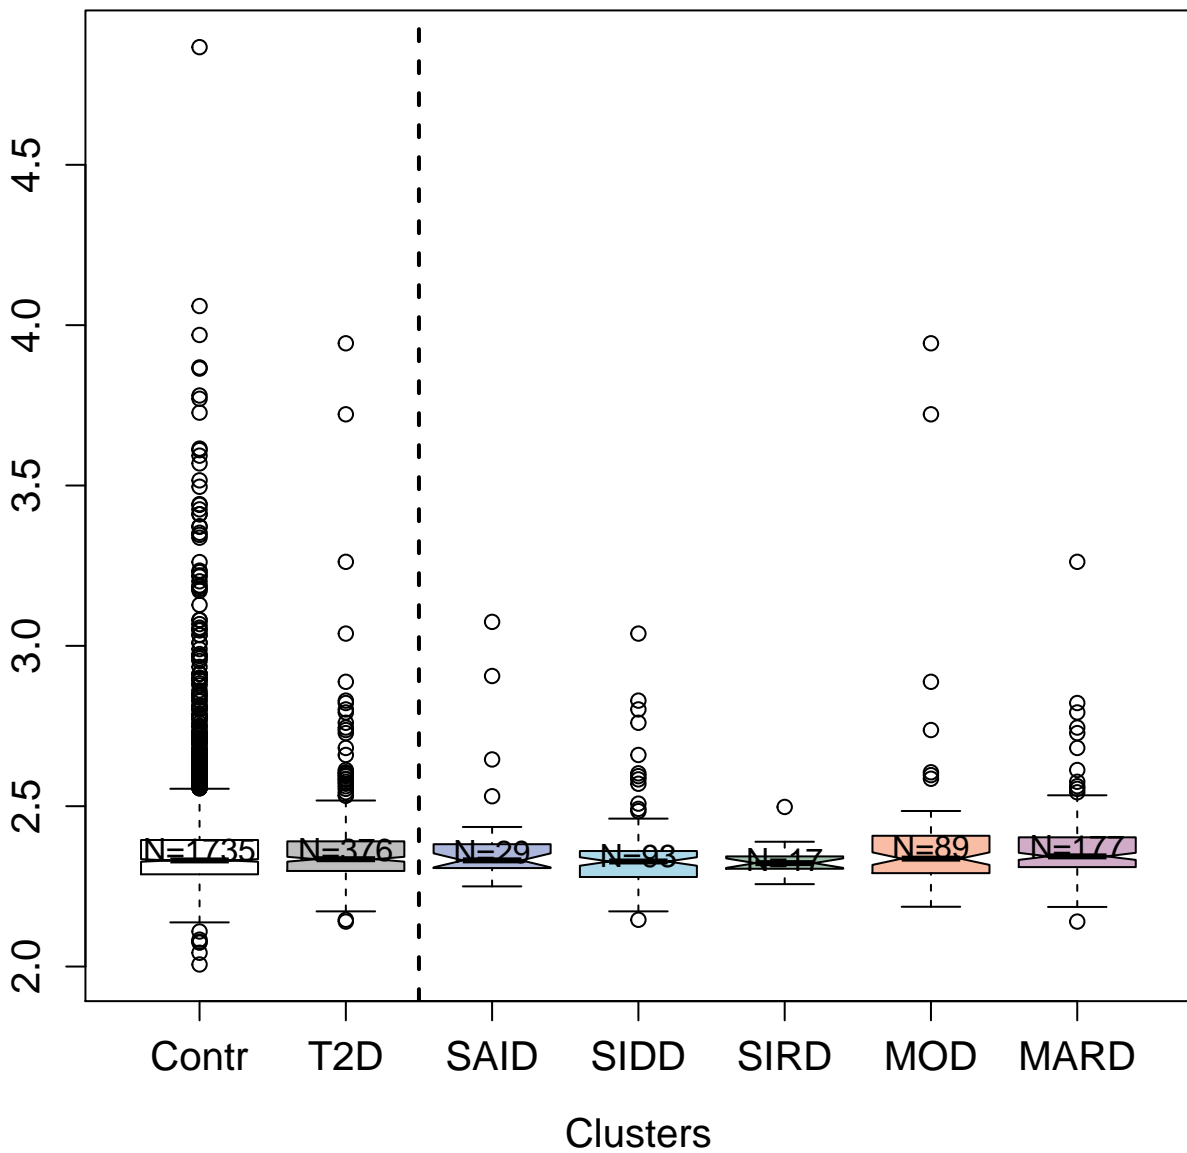

4557-61\_2 : Kin of IRRE-like protein 3

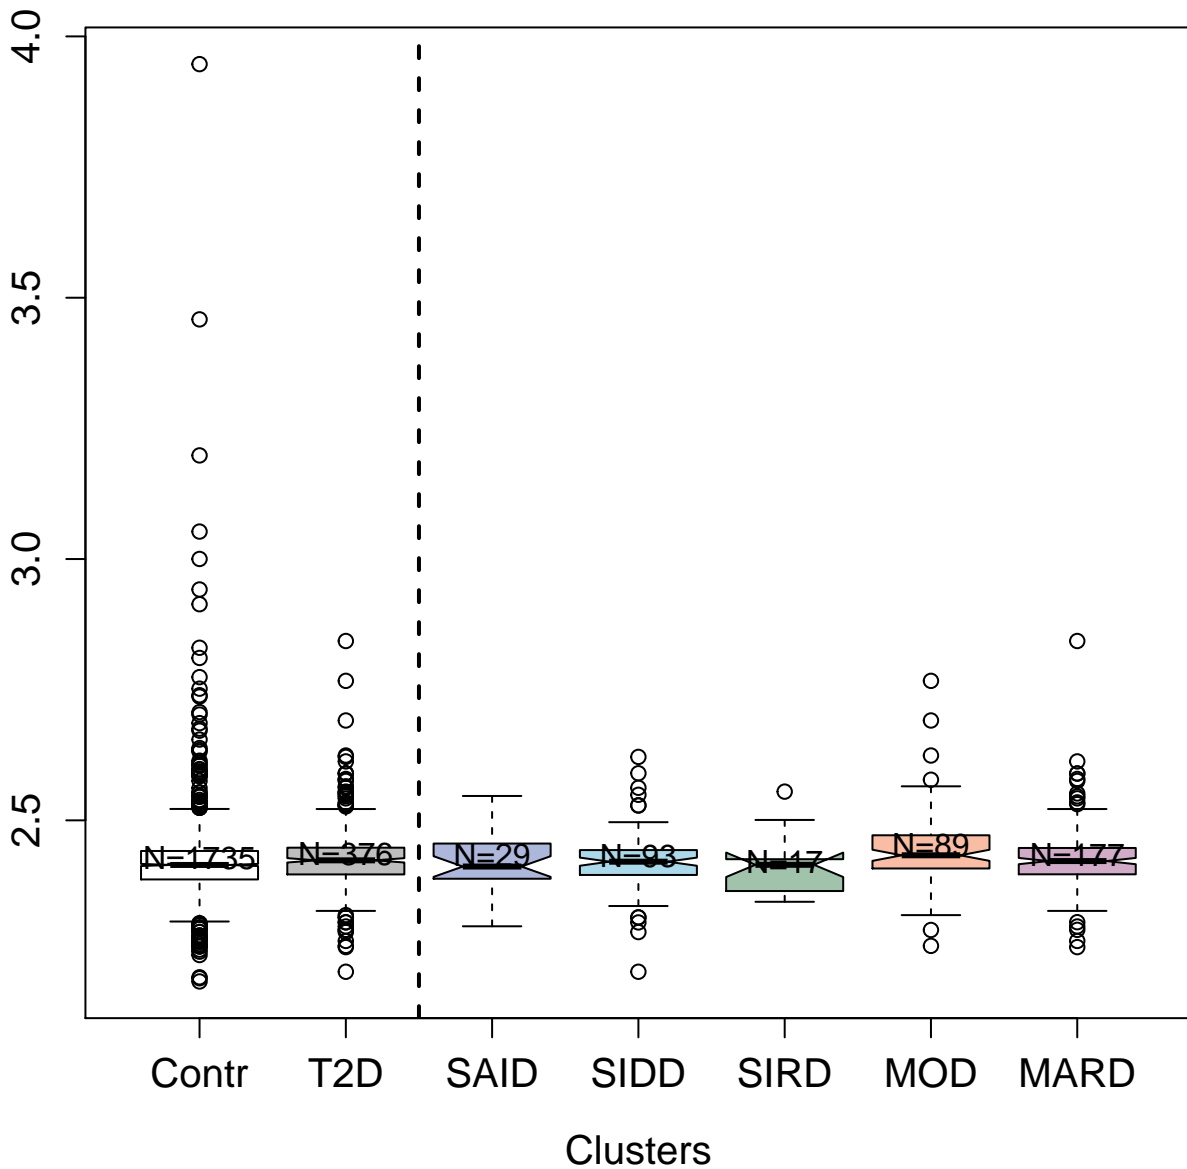

4254-6\_2 : NudC domain-containing protein 3

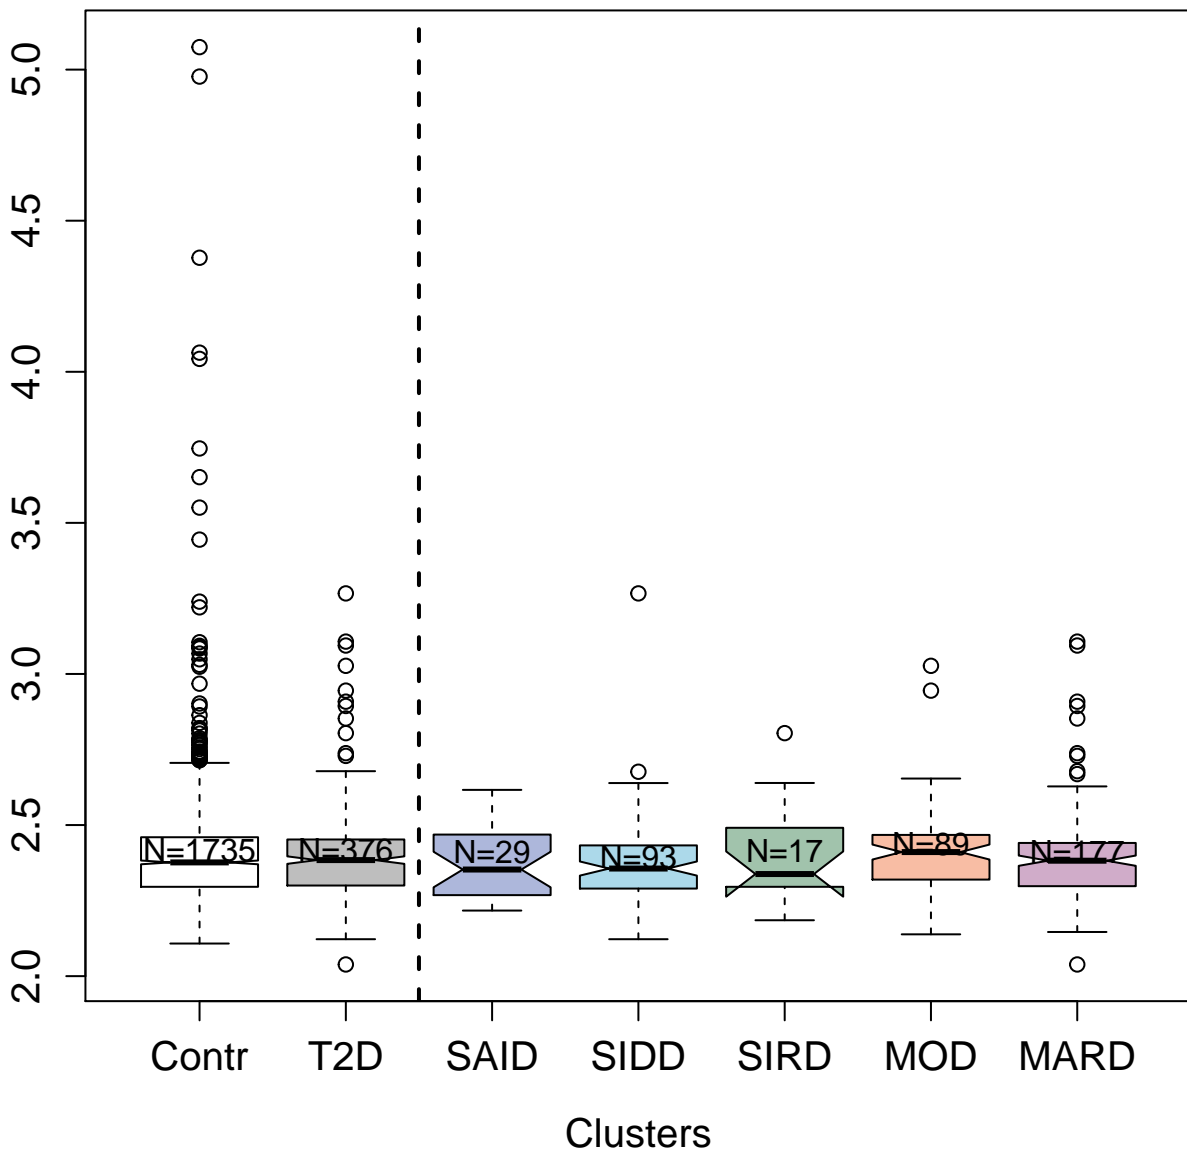

3514-49\_2 : Myeloblastin

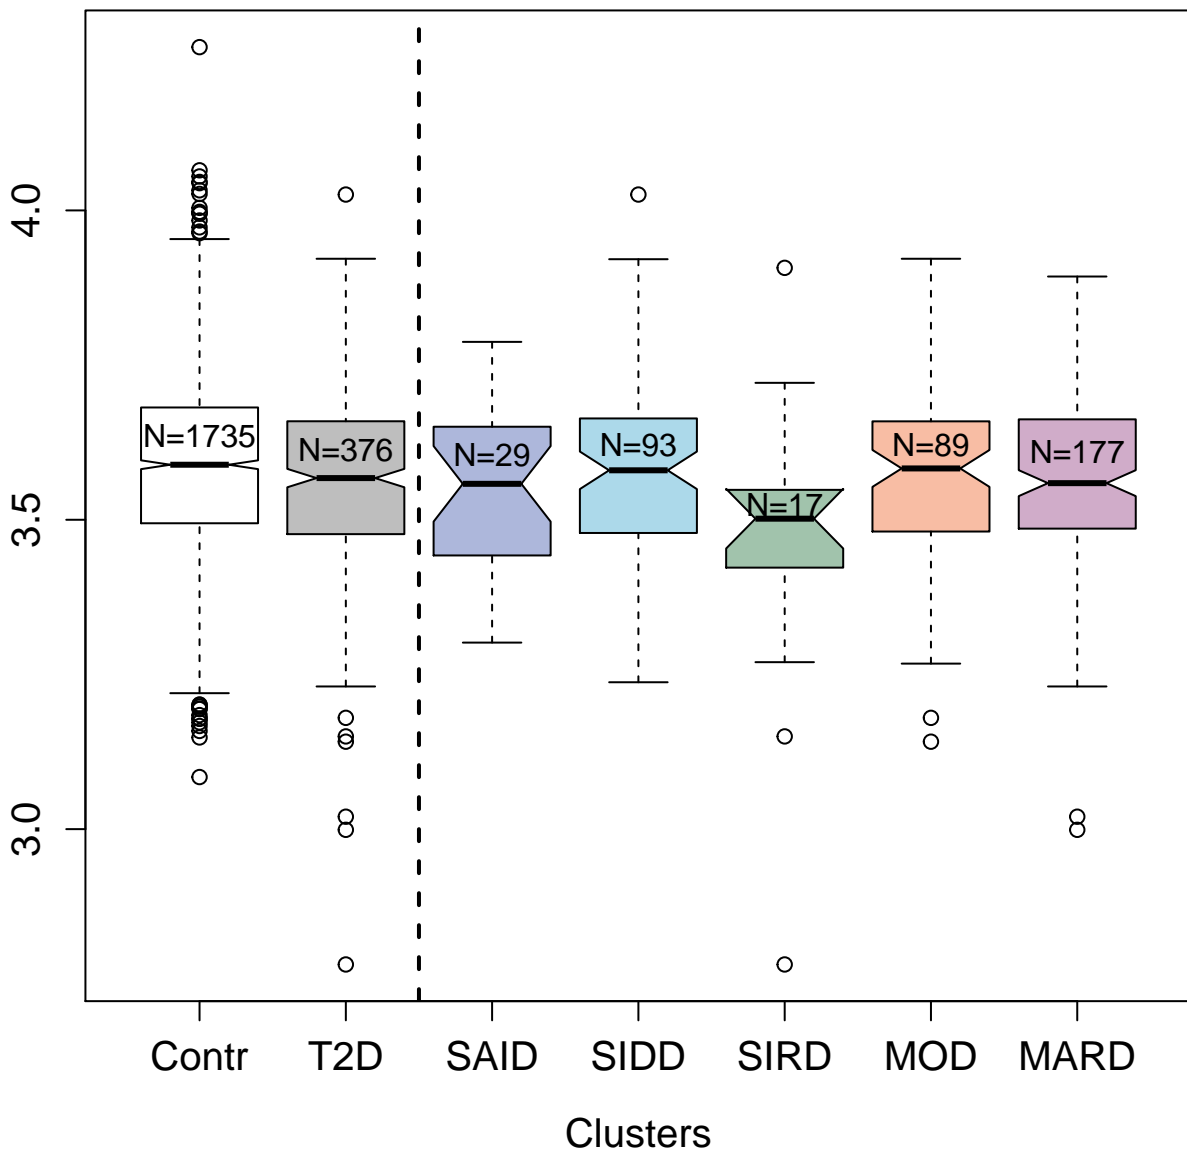

5066-134\_3 : CMRF35-like molecule 6

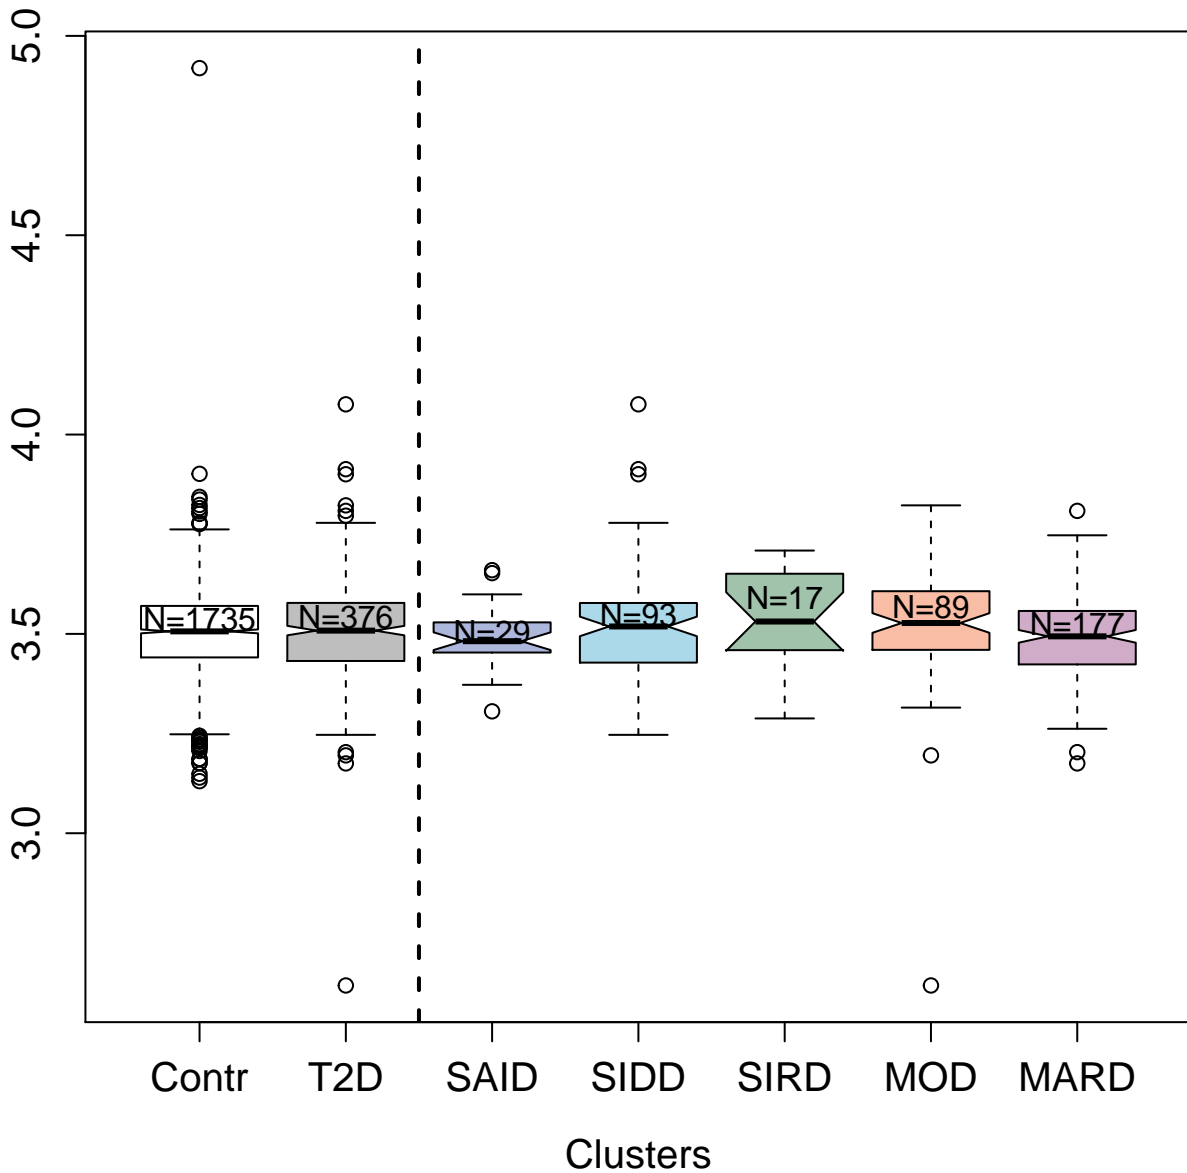

4859-6\_1 : Bone morphogenetic protein receptor  
type-1A

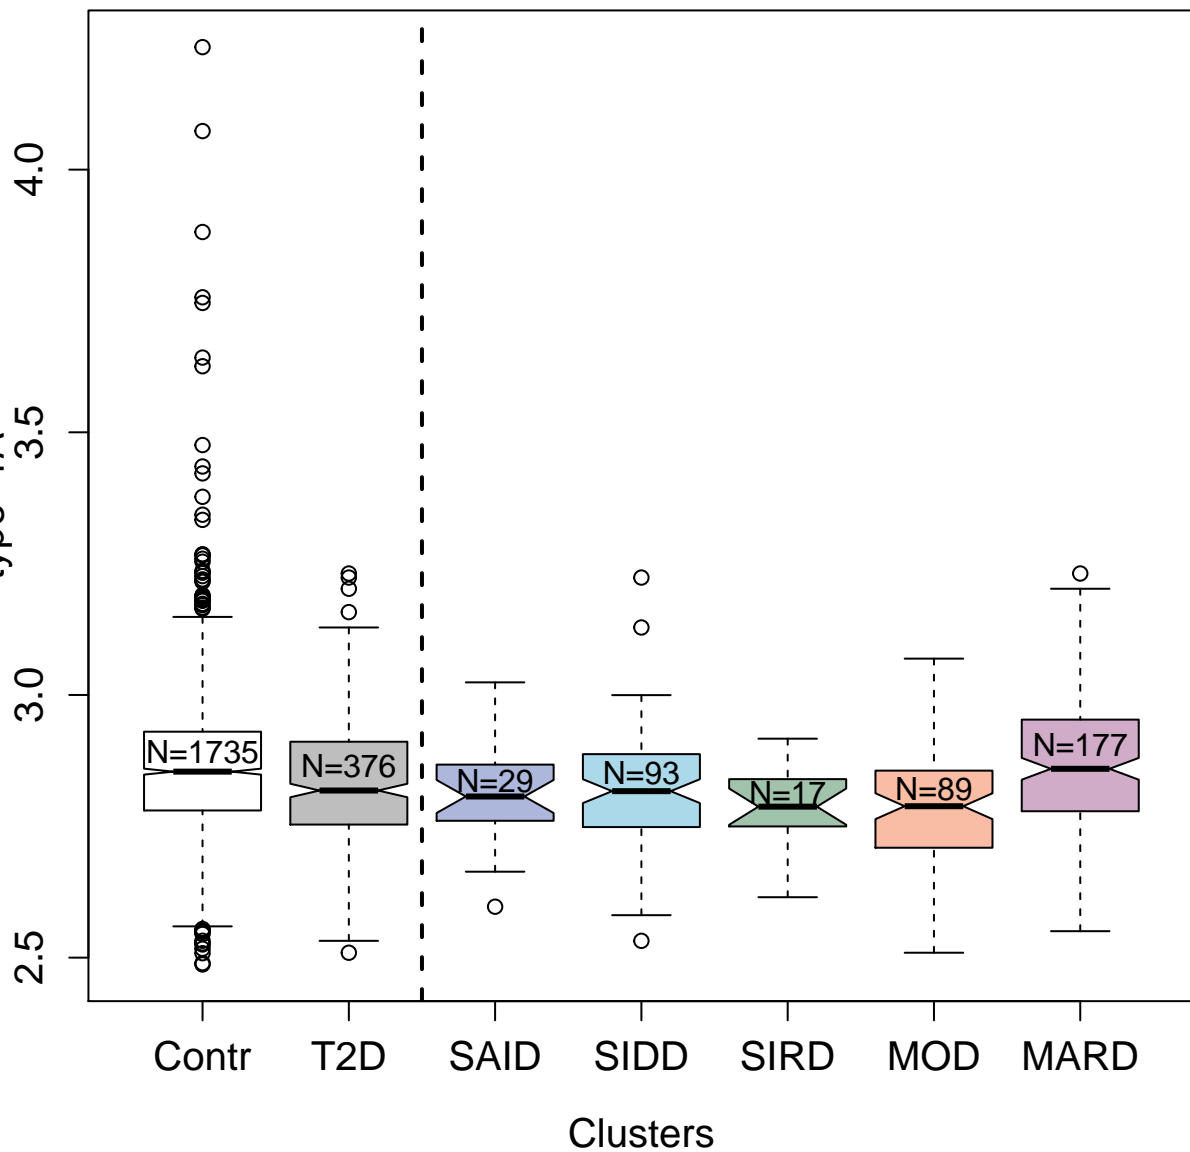



8488-33\_3 : Integrin alpha-11b: beta-3 complex

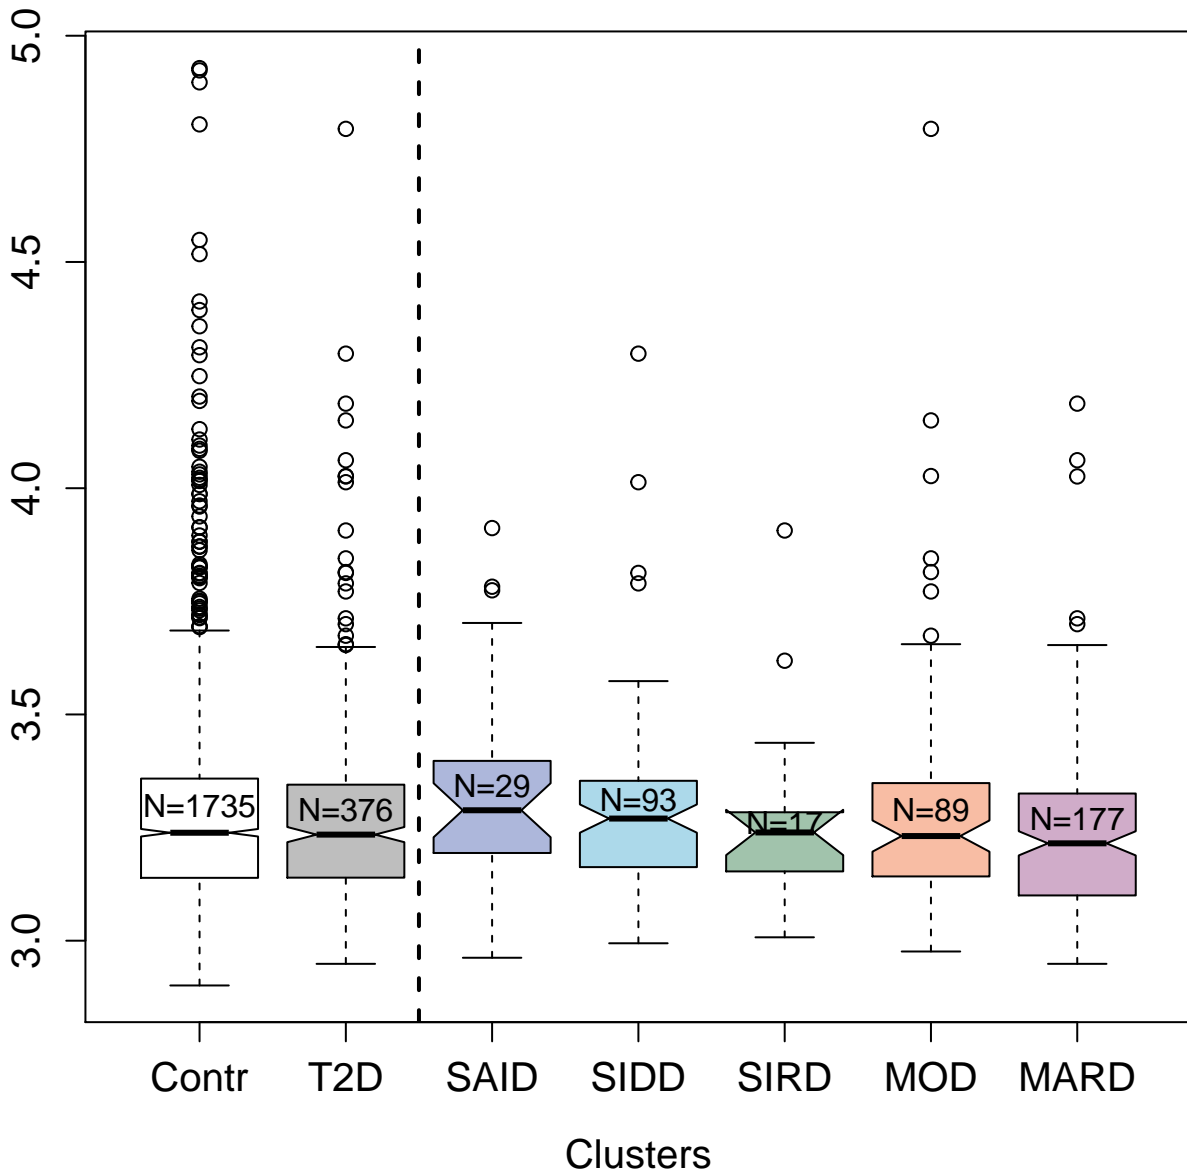

4342-10\_3 : Intercellular adhesion molecule 1

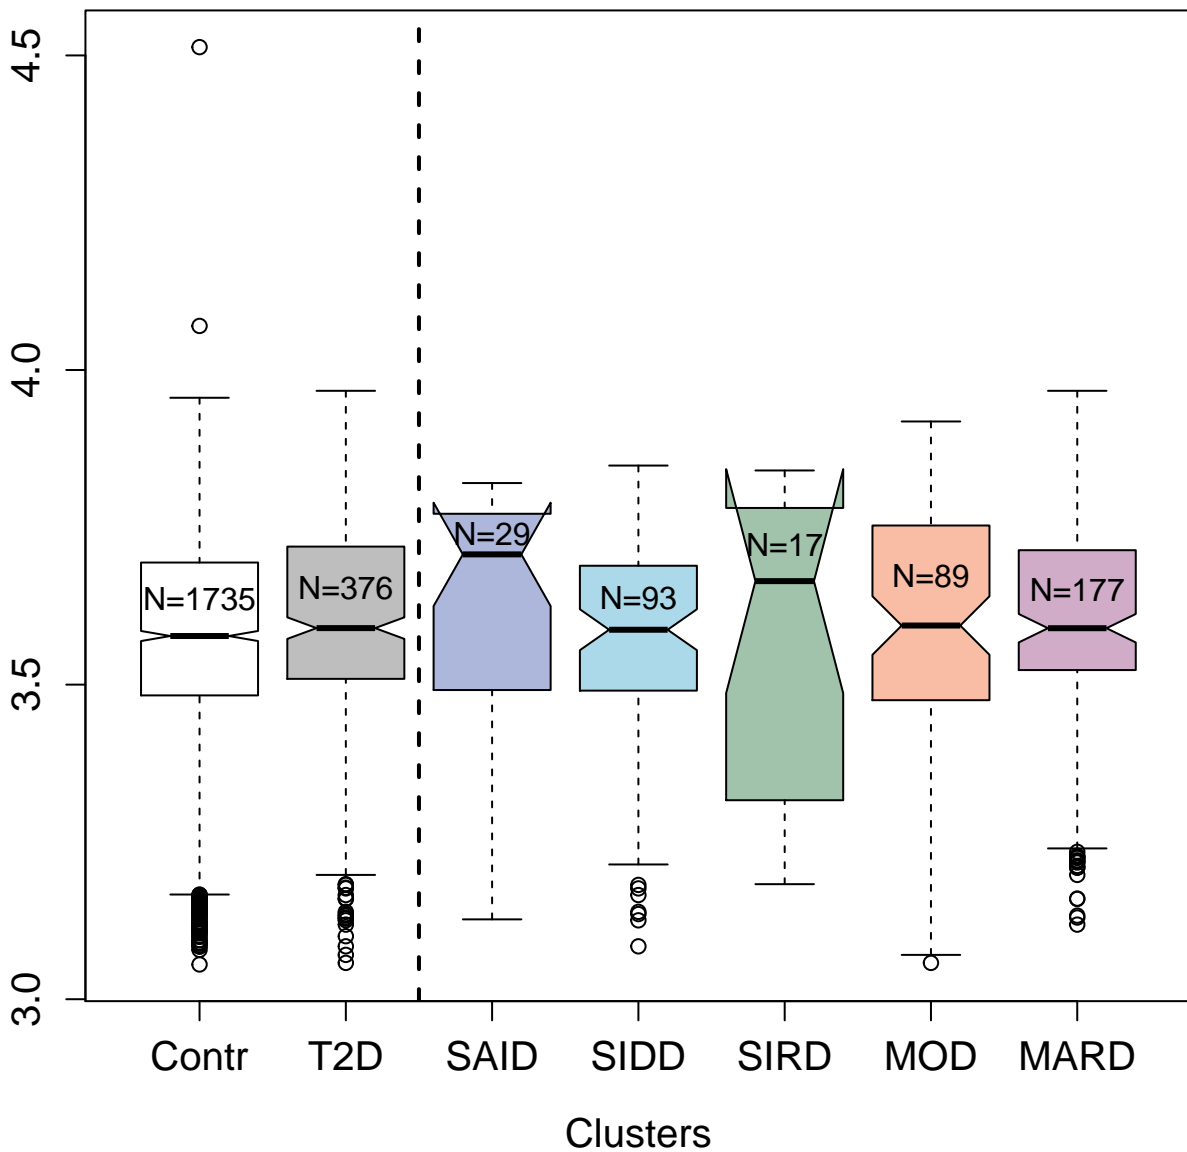

2741-22\_2 : Sialic acid-binding Ig-like lectin 6

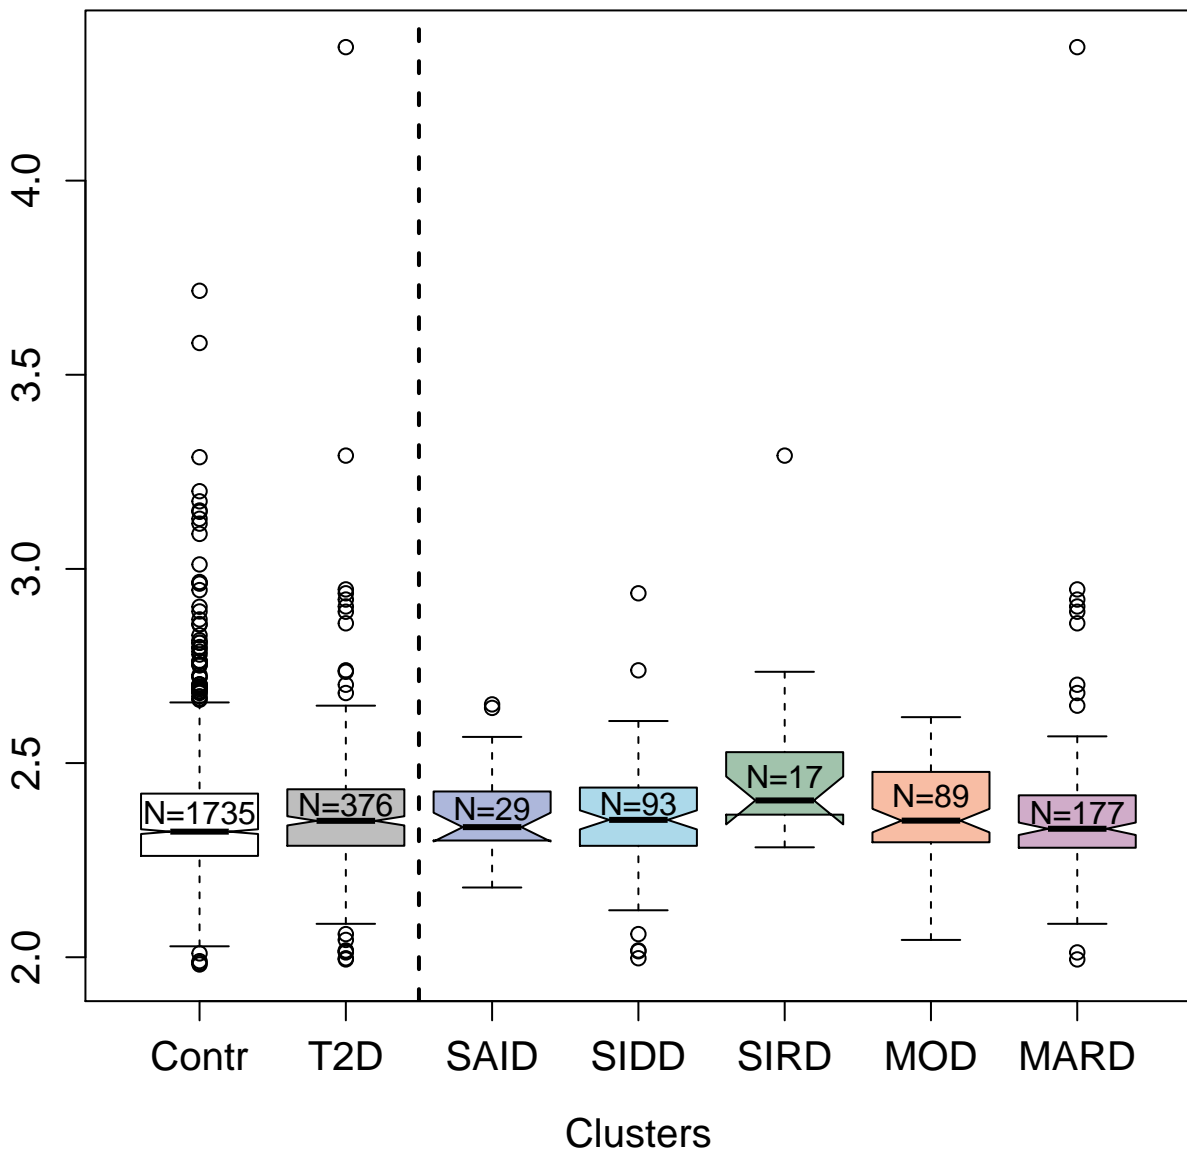

5491-12\_3: Testican-2

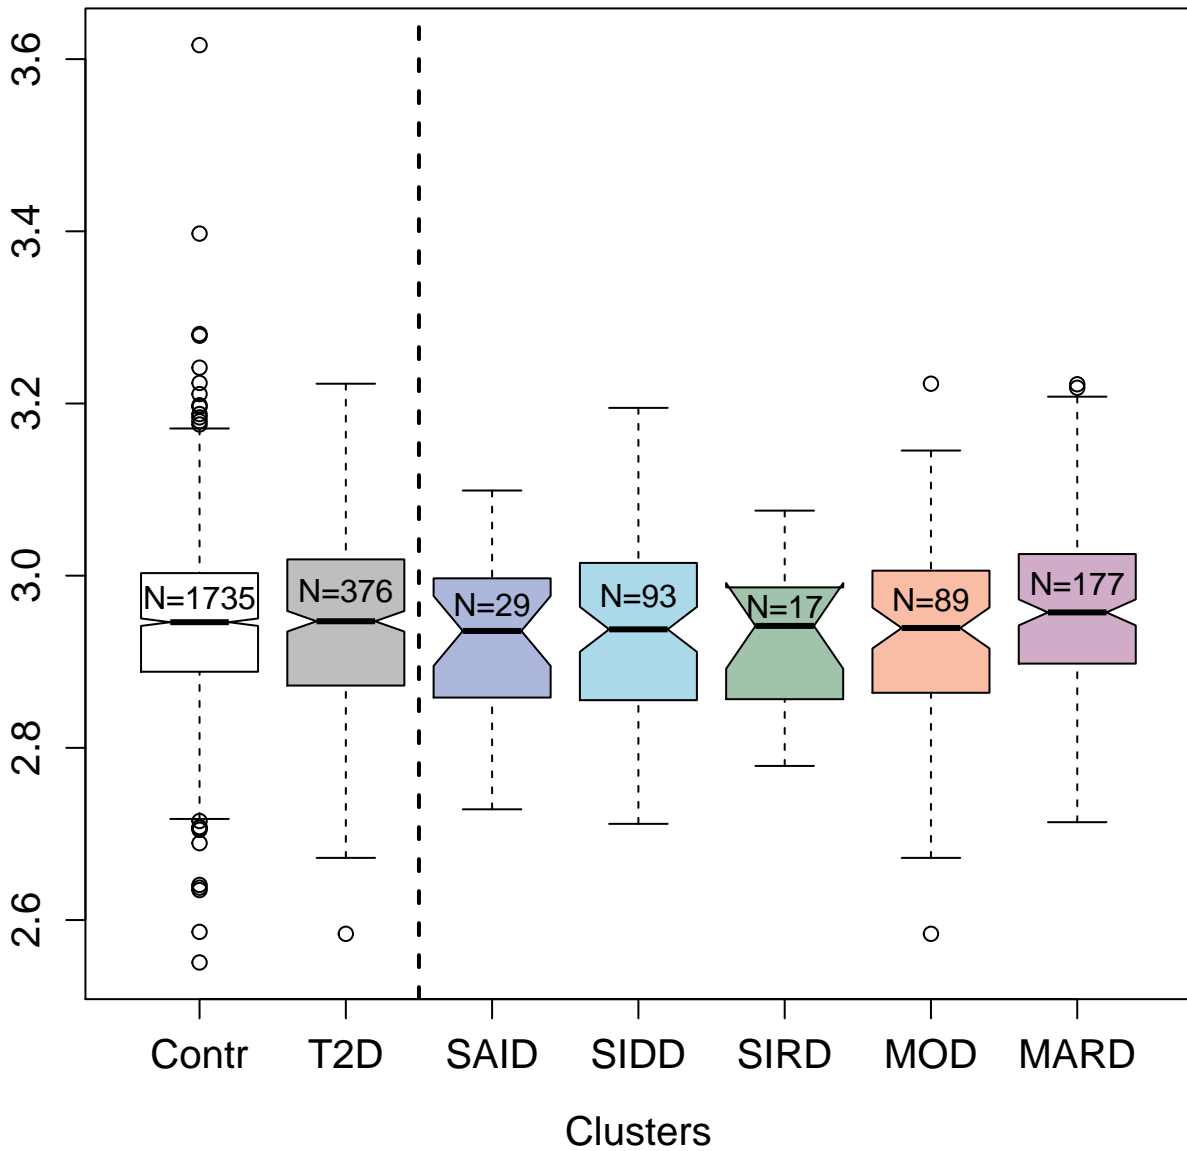

4957-1\_2 : 40S ribosomal protein SA

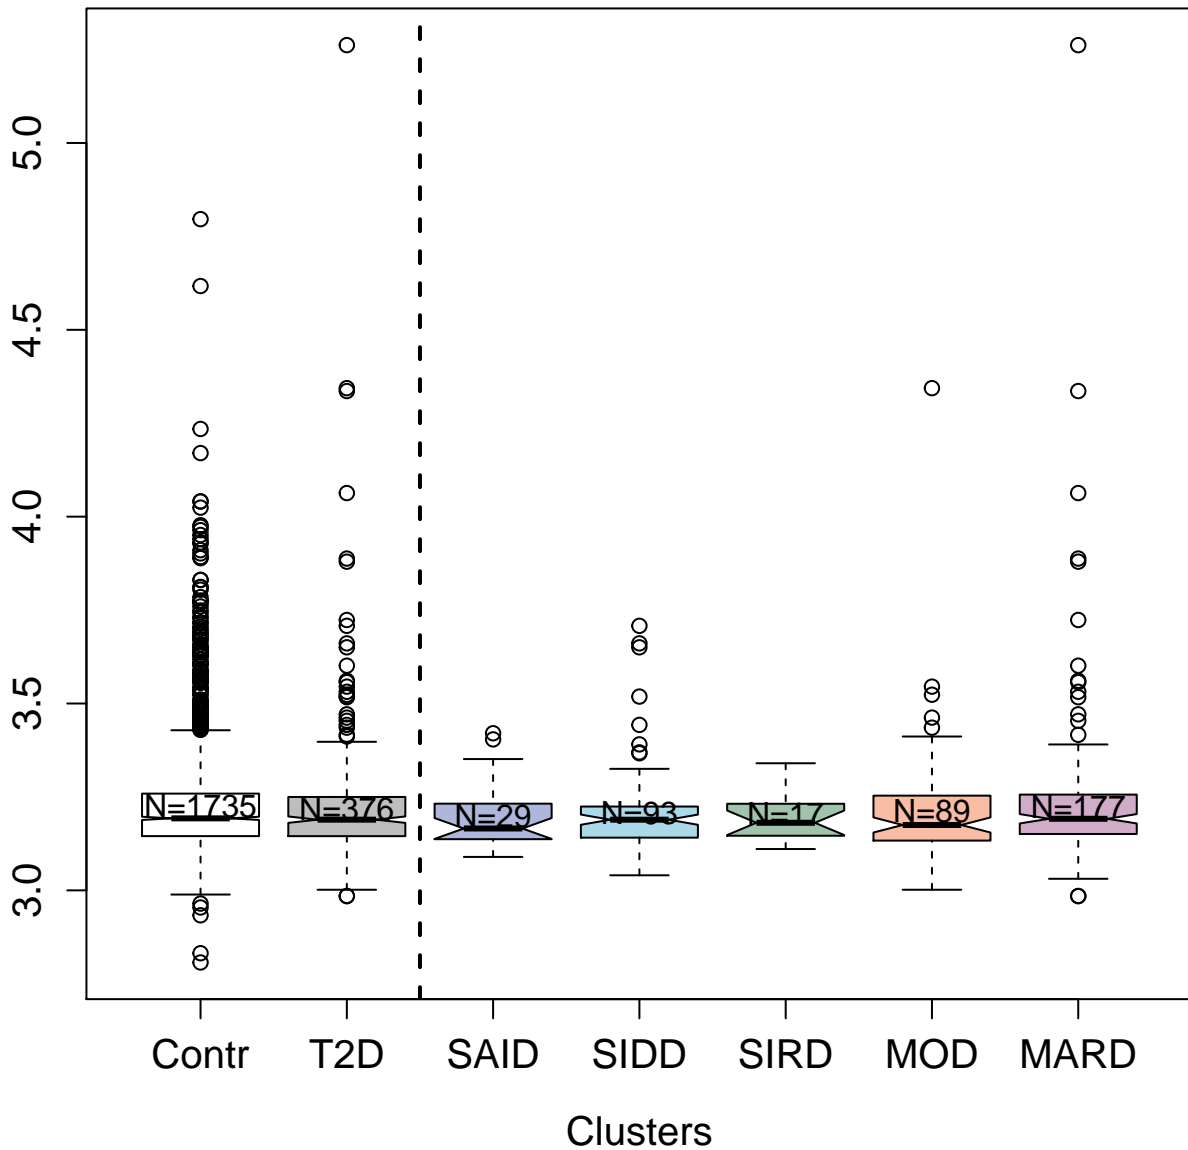

4203-50\_2 : Cofilin-1

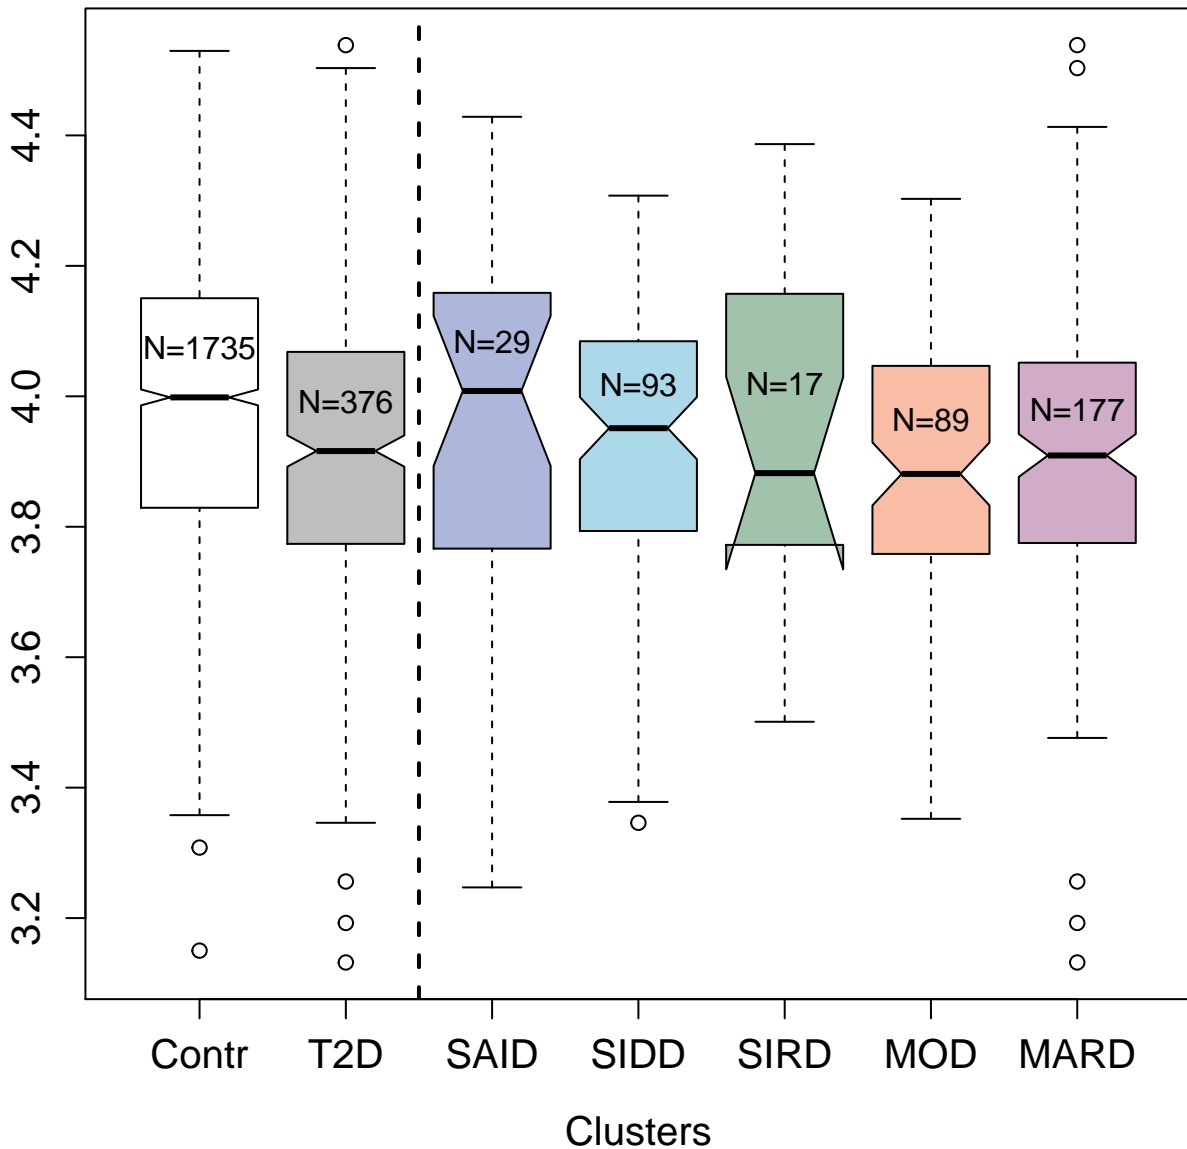

2835-1\_4 : X-ray repair cross-complementing

protein 6

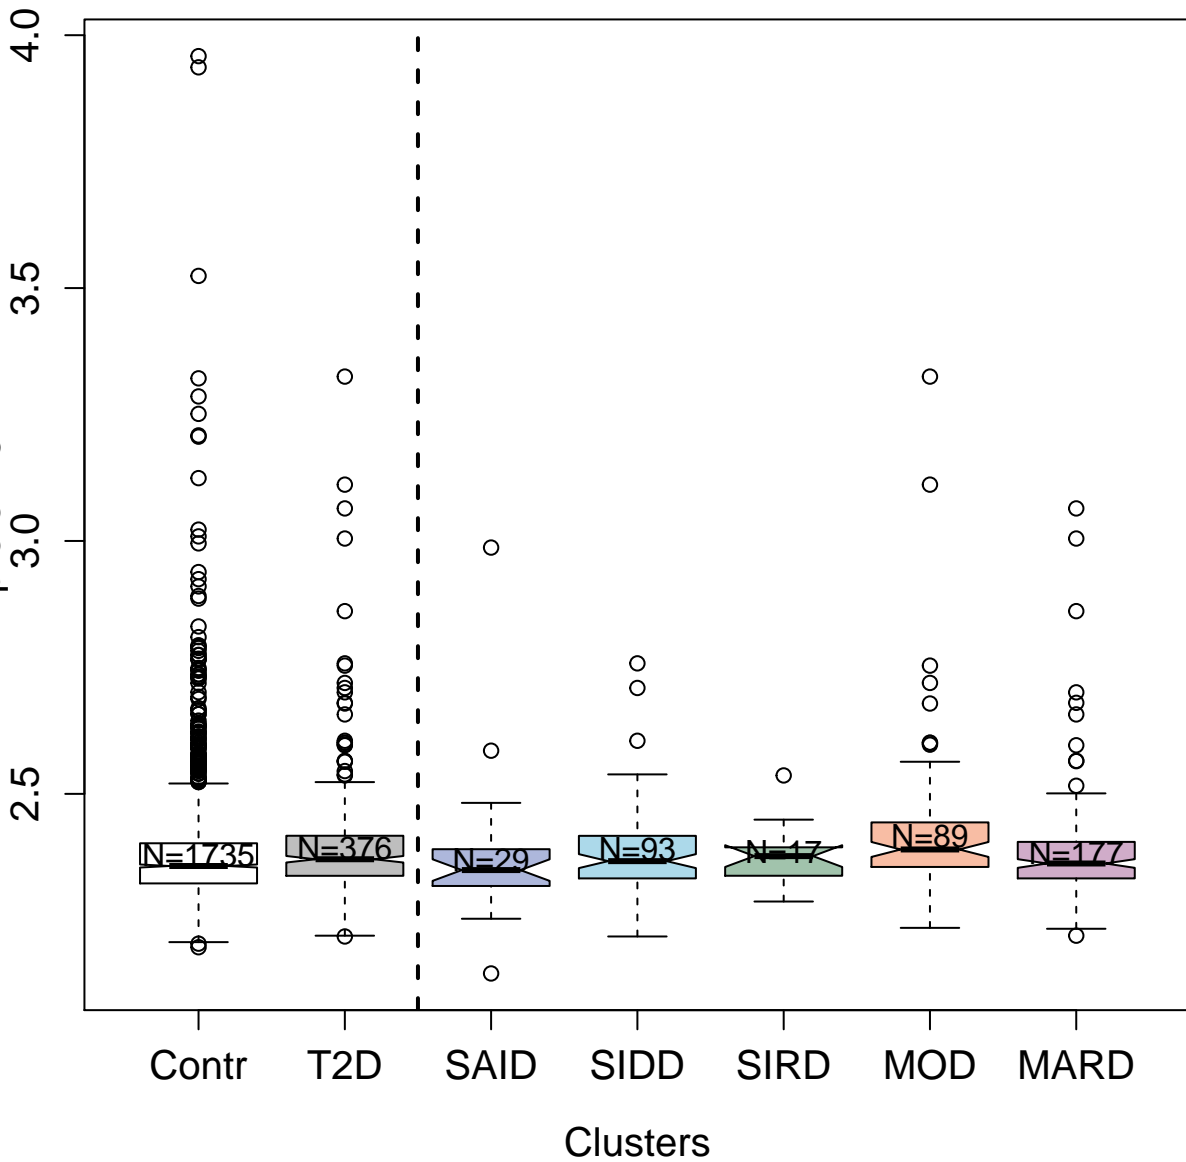

3364-76\_2 : Cathepsin L2

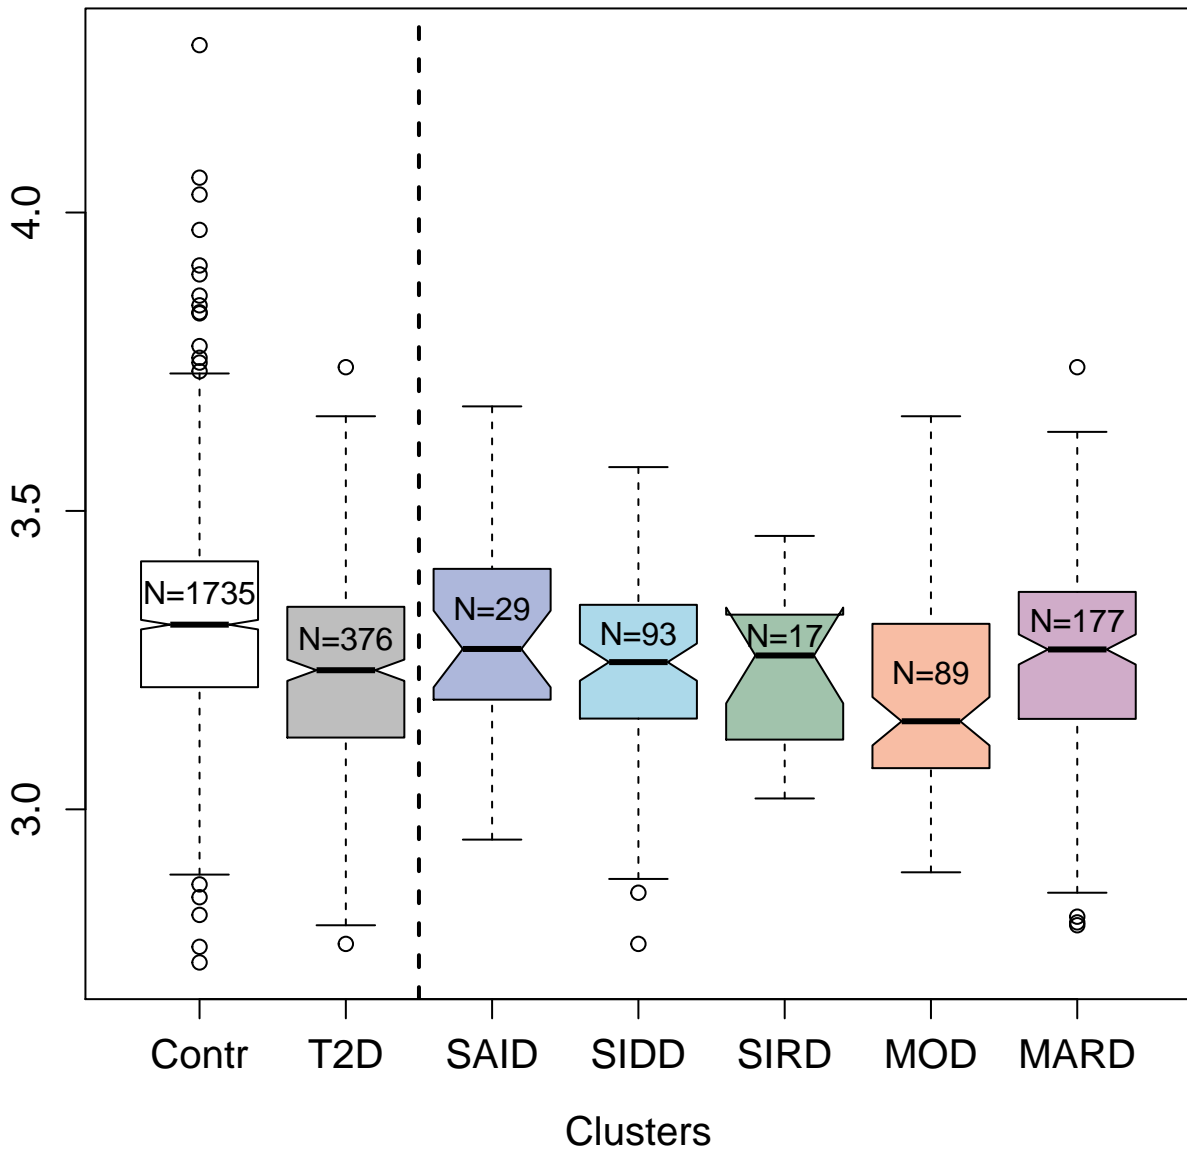



5112-73\_3 : OX-2 membrane glycoprotein

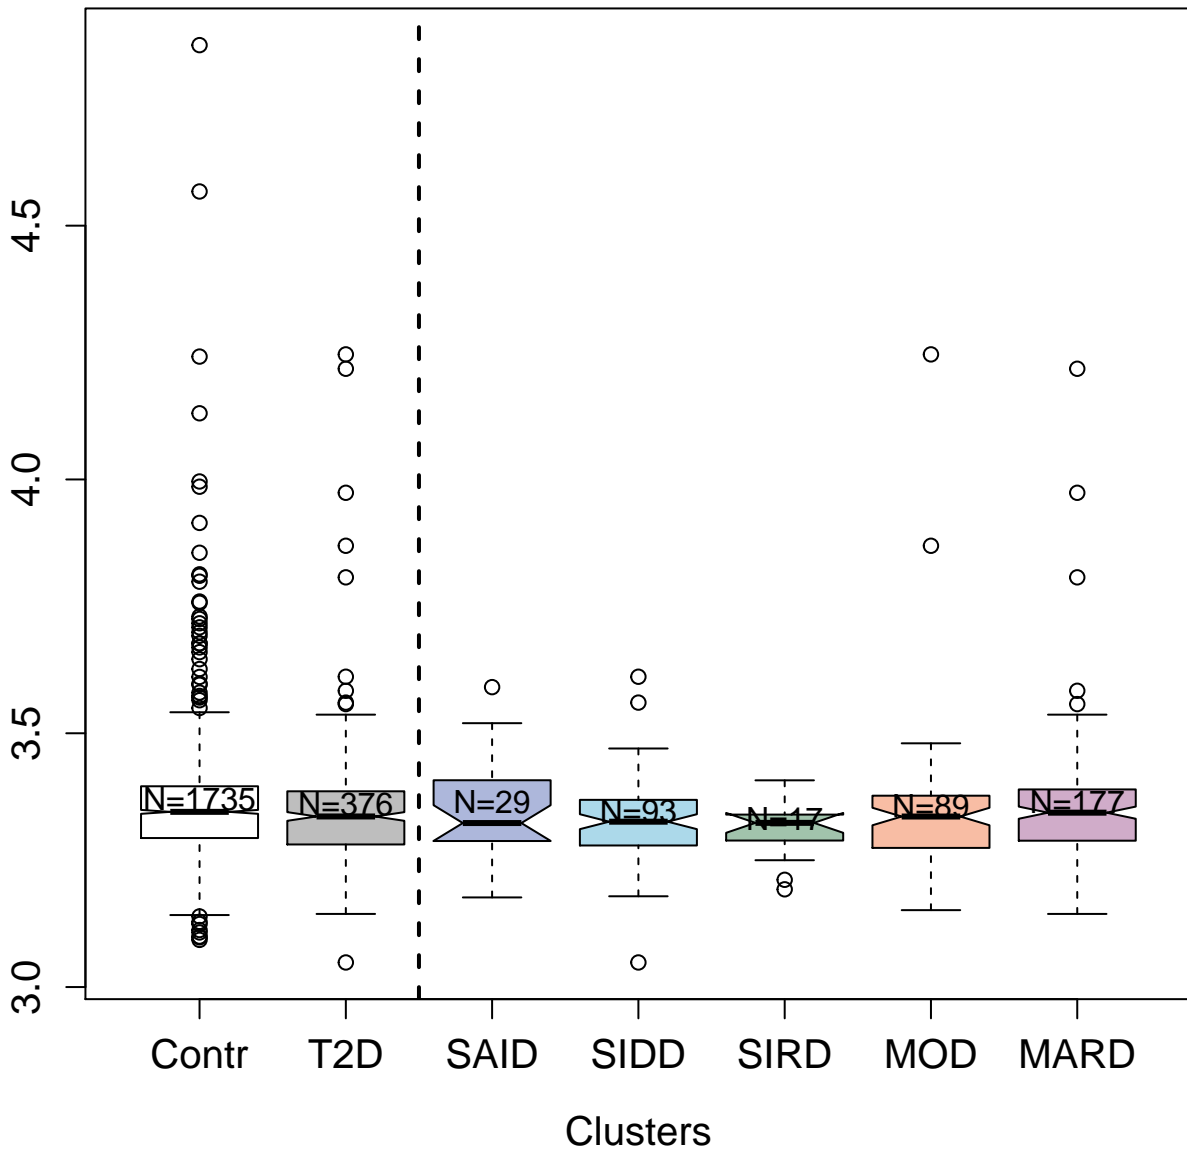

5340-24\_3 : Caspase-10

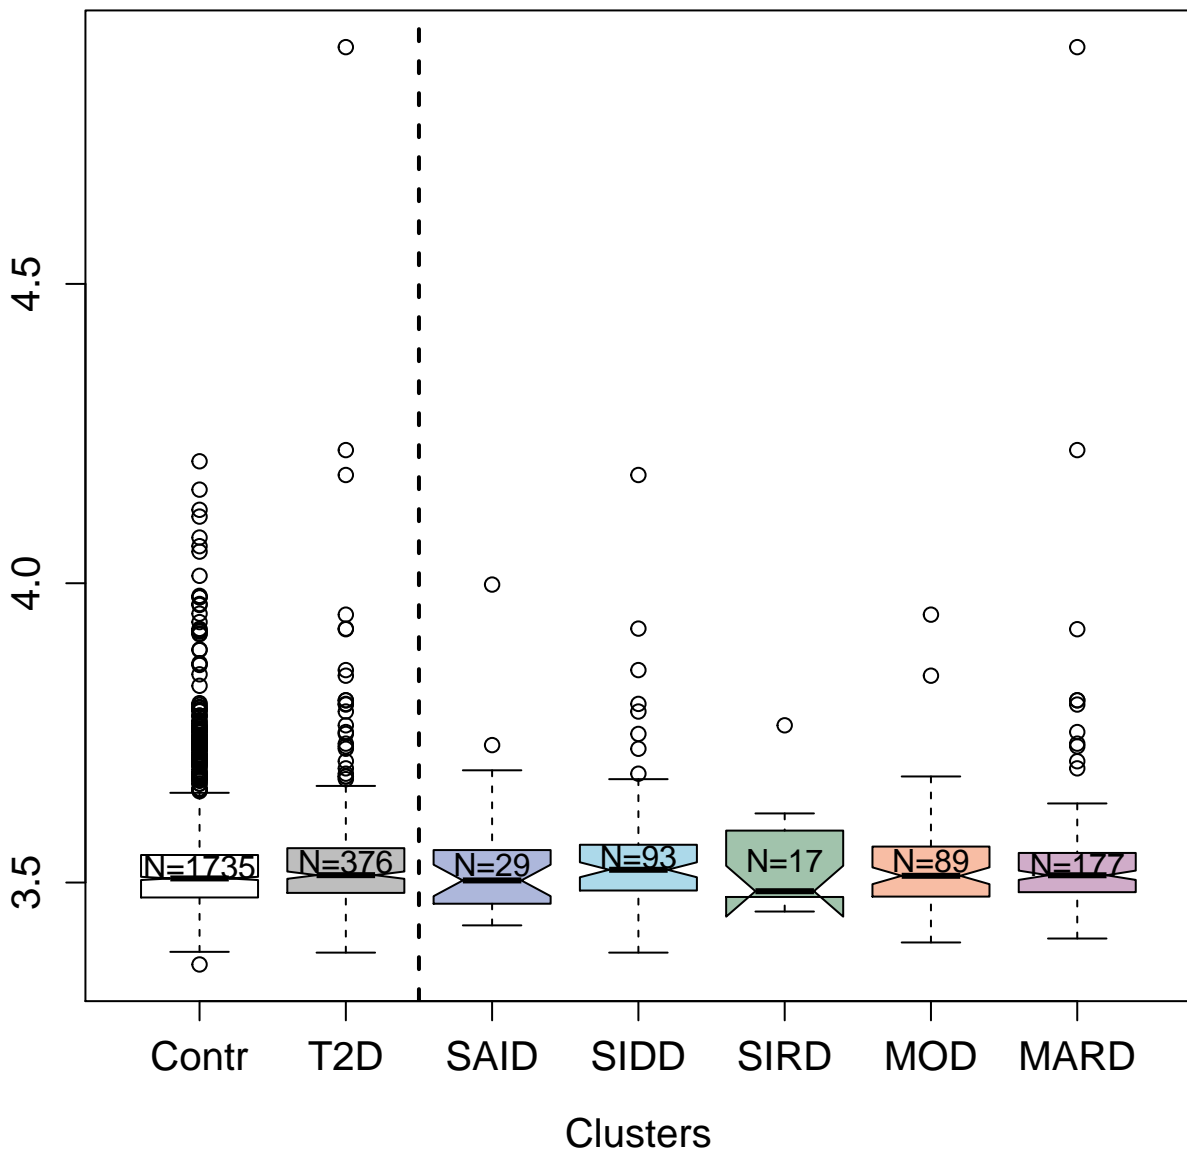

13129-40\_3 : Low-density lipoprotein receptor

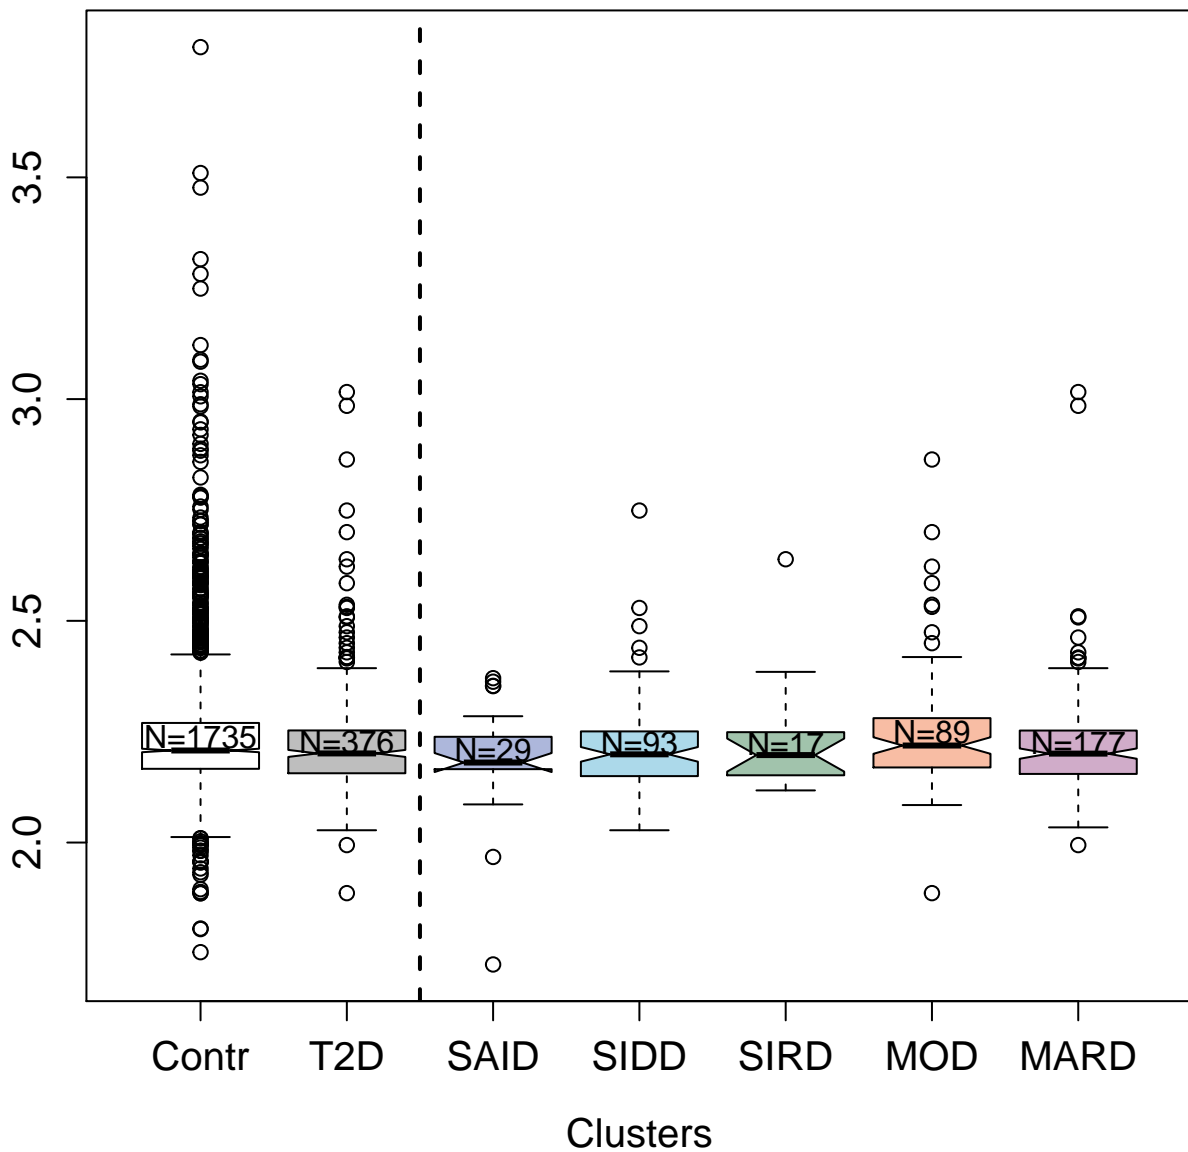

3877-67\_2 : Calcium/calmodulin-dependent protein kinase kinase 1

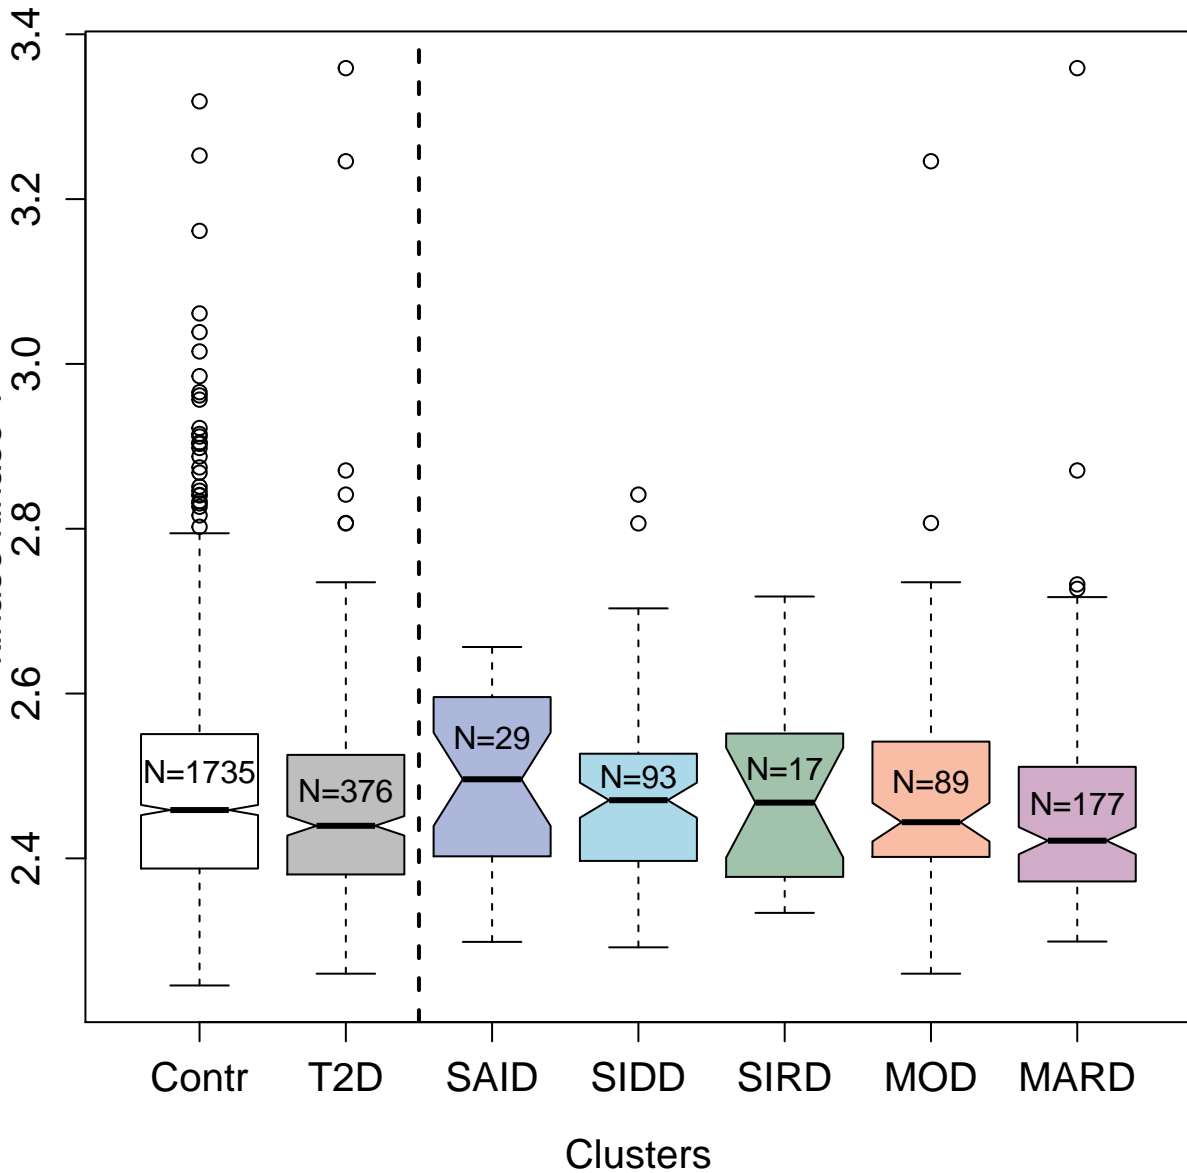

5532-53\_3 : Fibroblast growth factor receptor 1

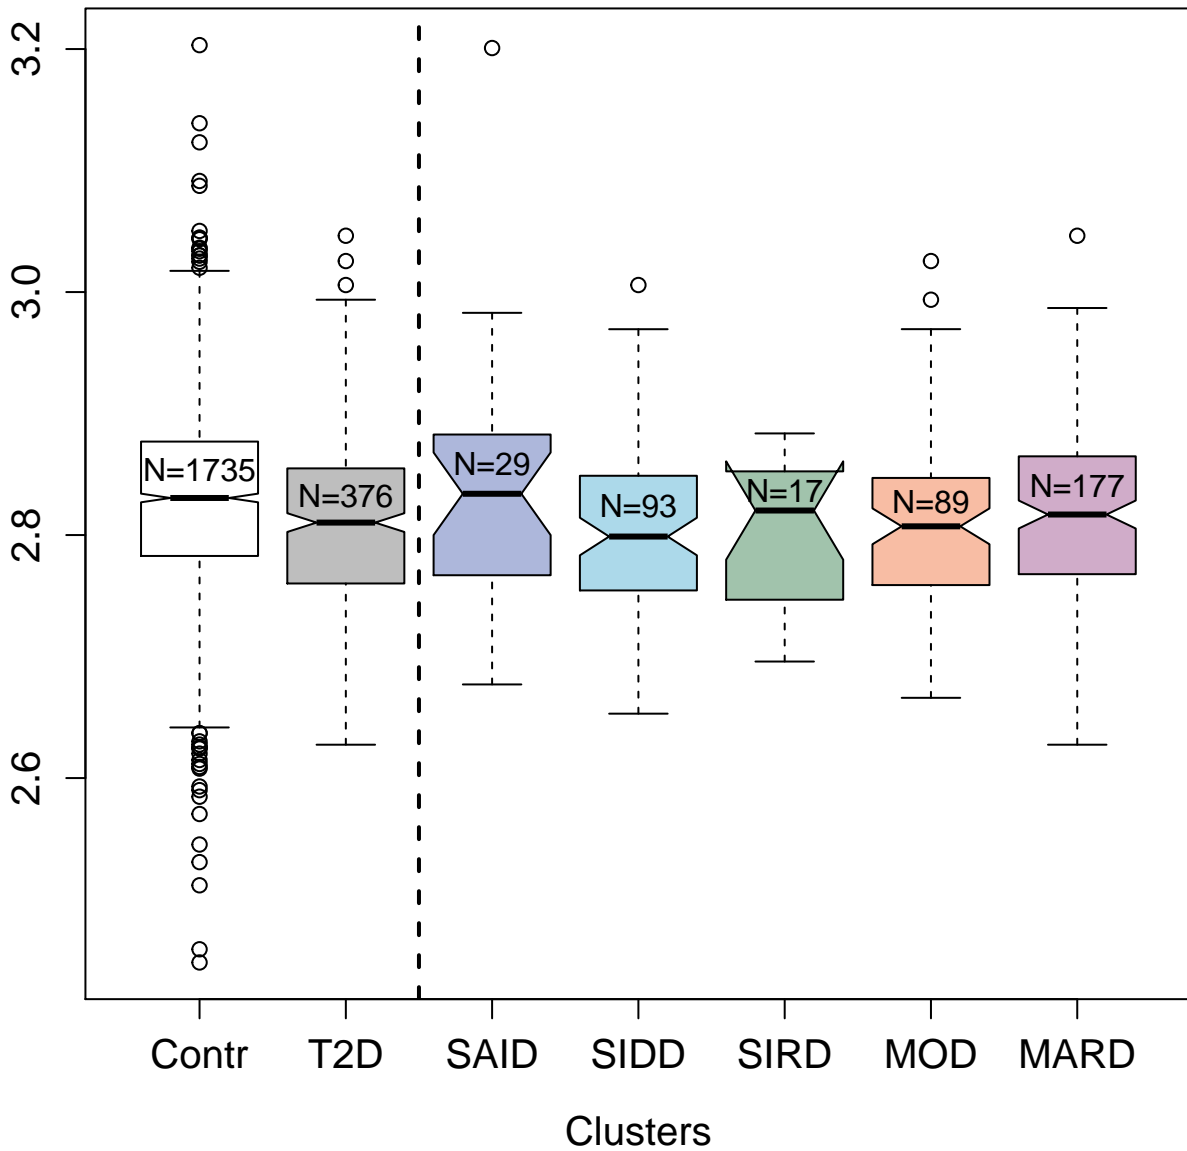

5476-66\_3 : Protein kinase C gamma type

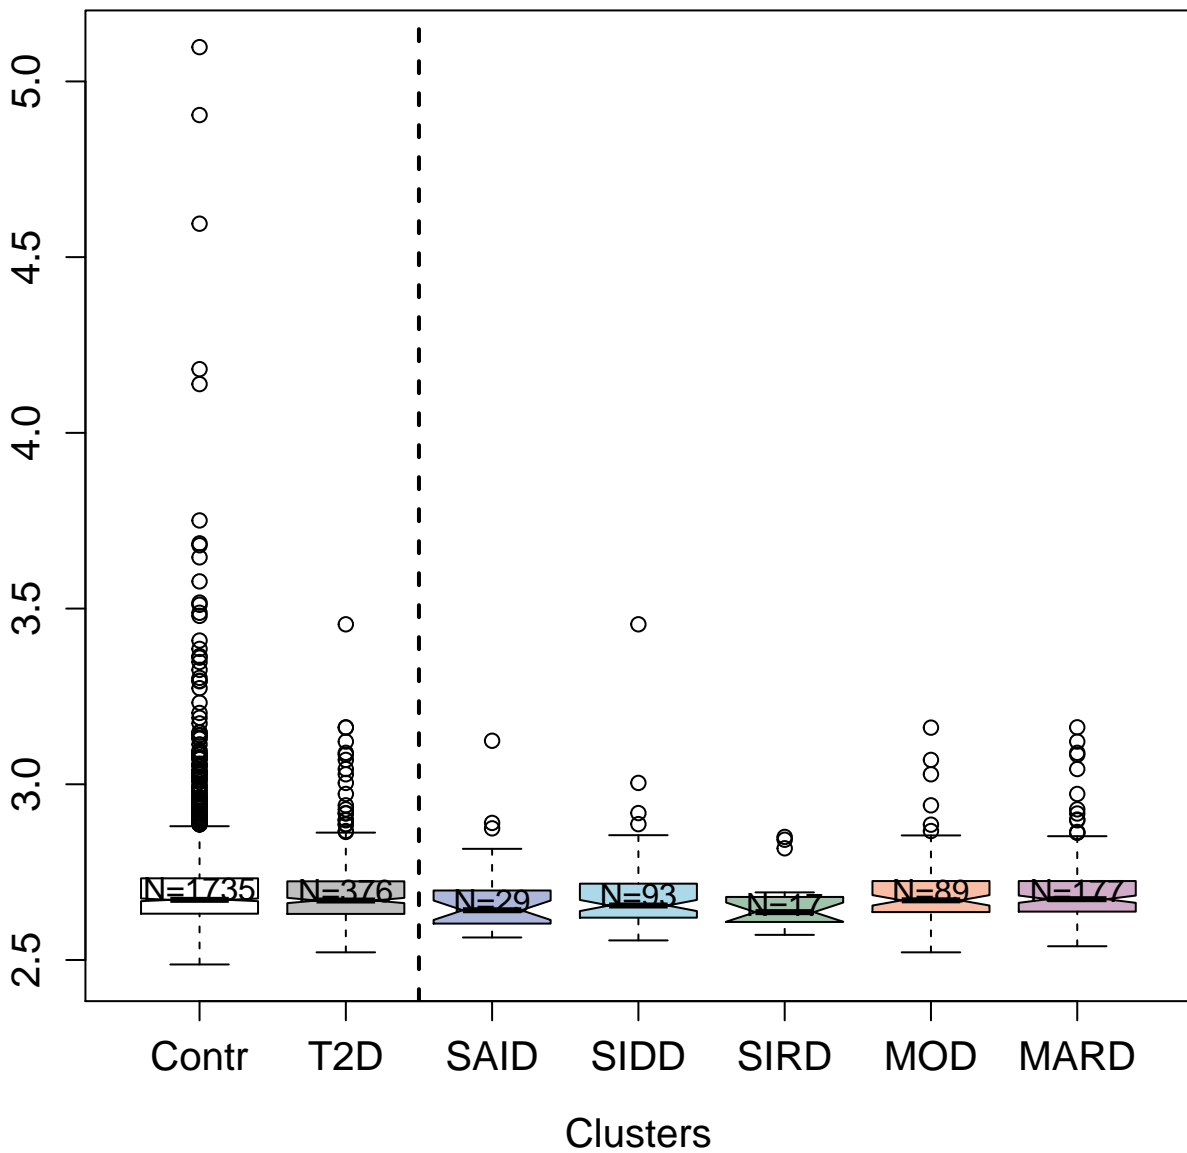

9180-6\_3 : Interferon gamma receptor 2

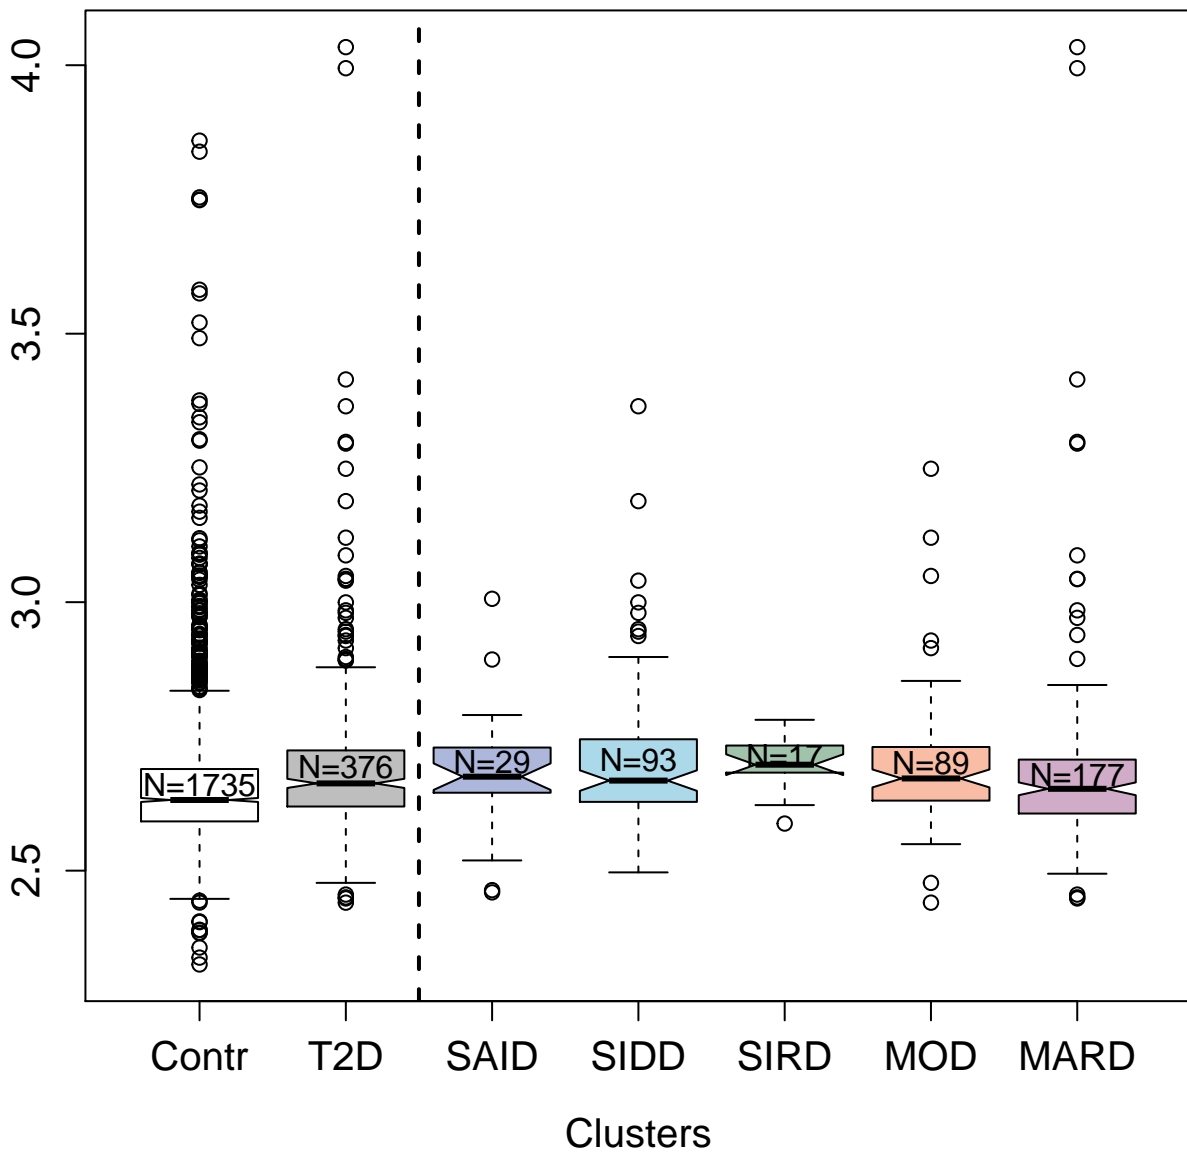

3172-28\_2 : Arylsulfatase B

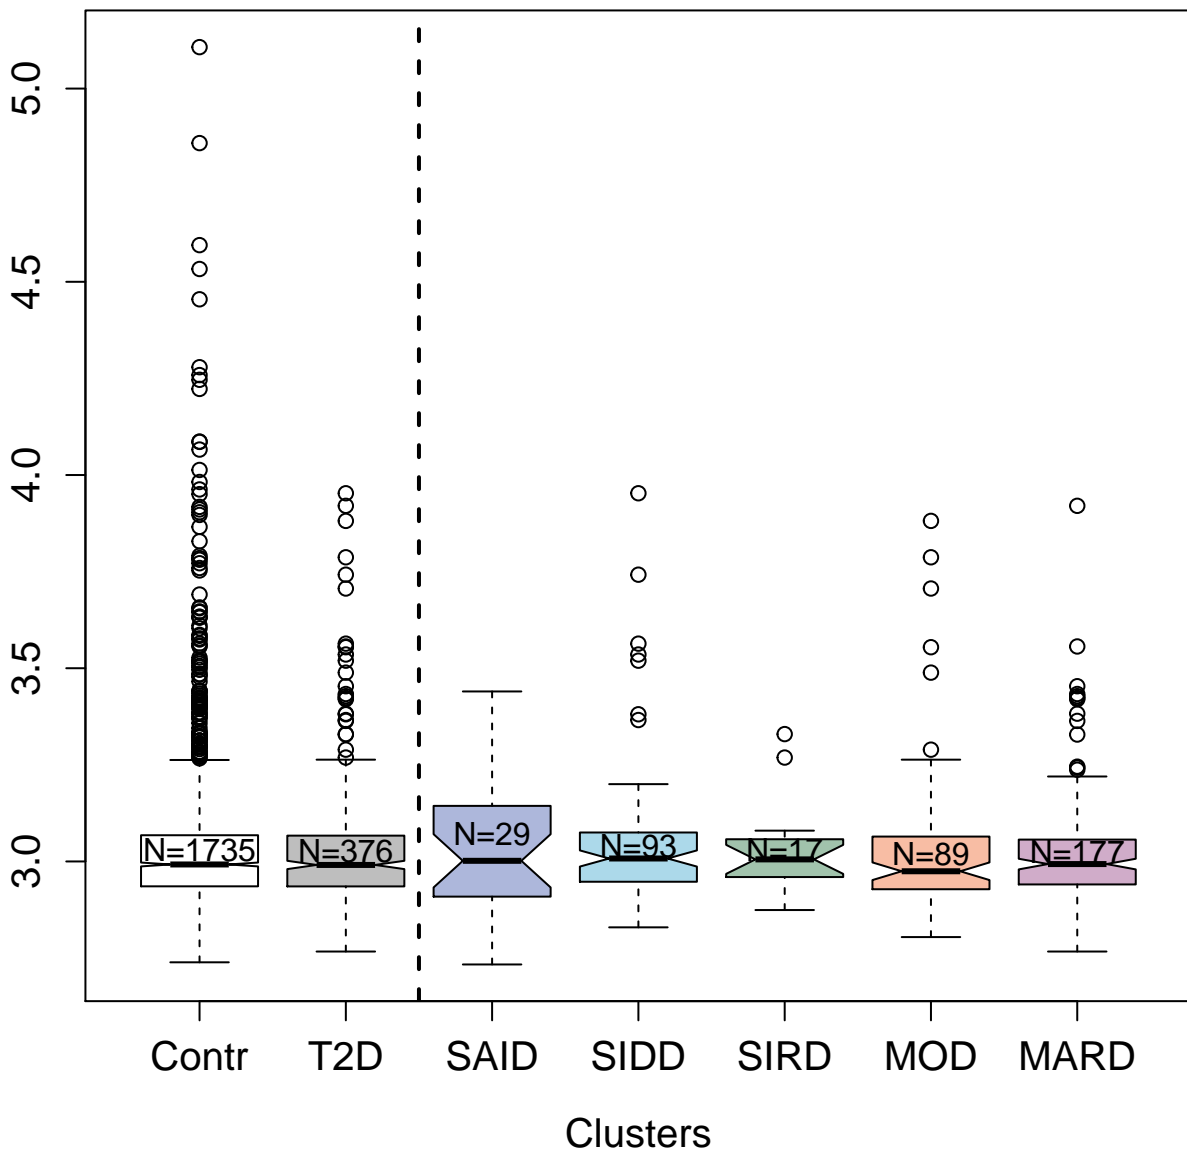



# 5468-67\_3 : Interleukin-17 receptor C

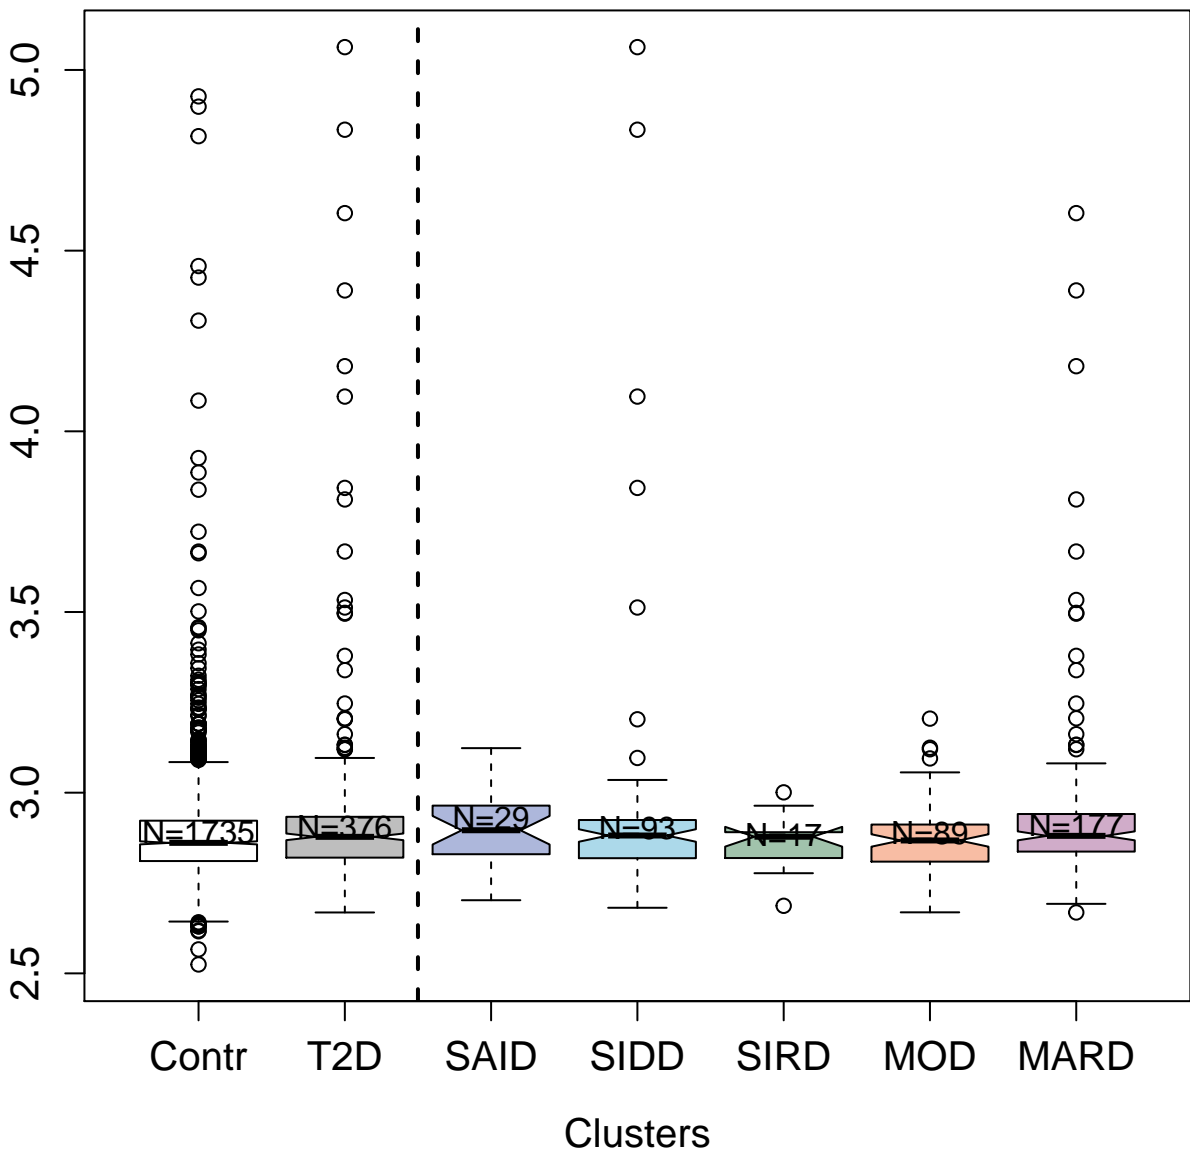

3642-4\_1 : SLAM family member 5

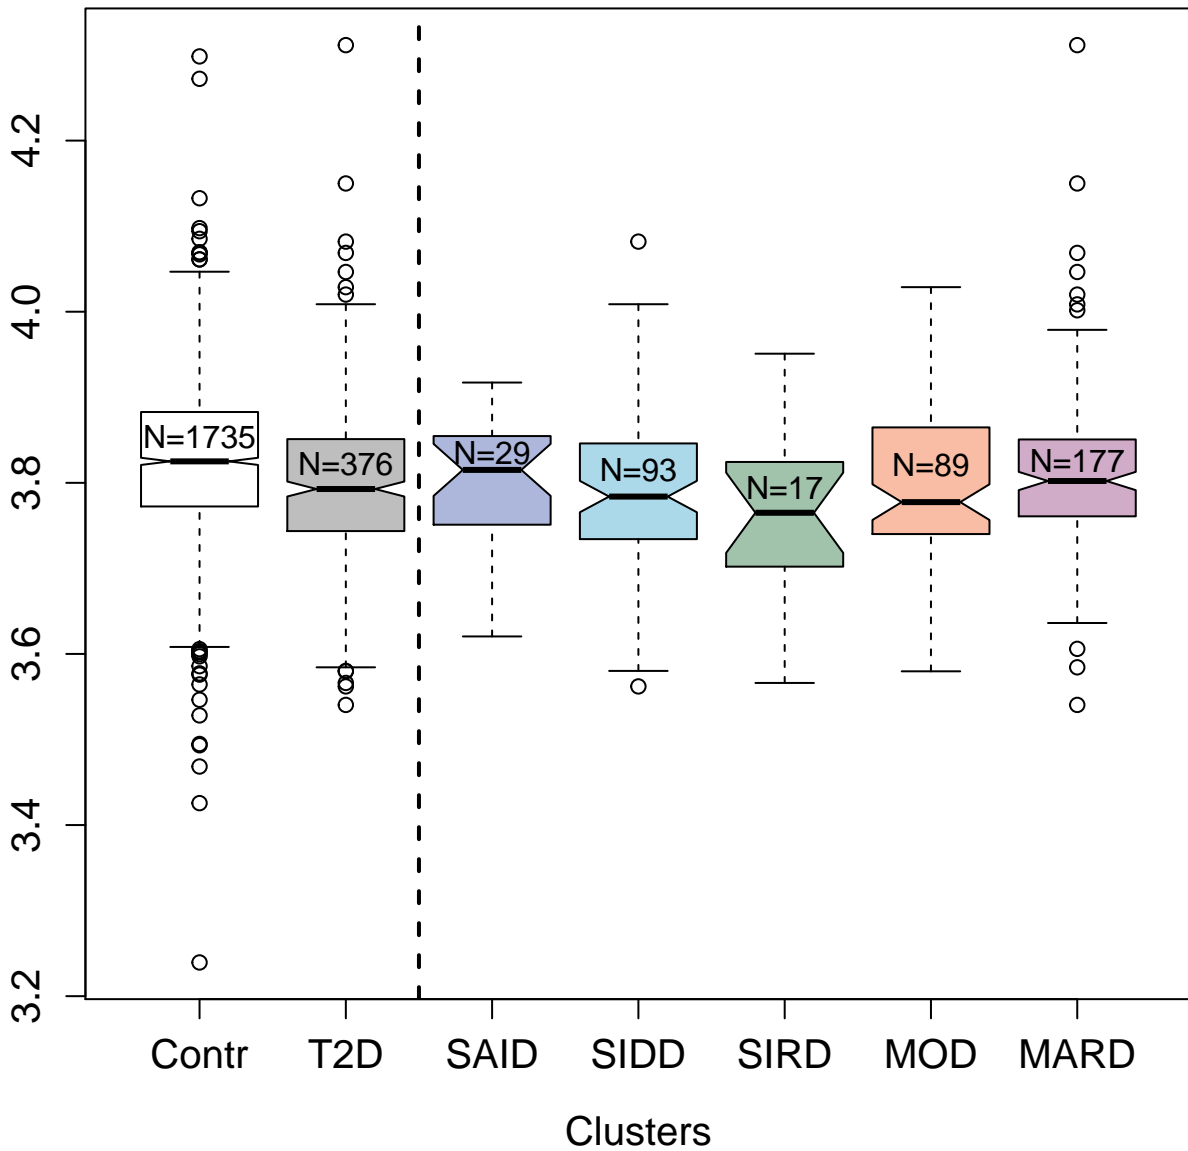

3198-4\_1 : Iduronate 2-sulfatase

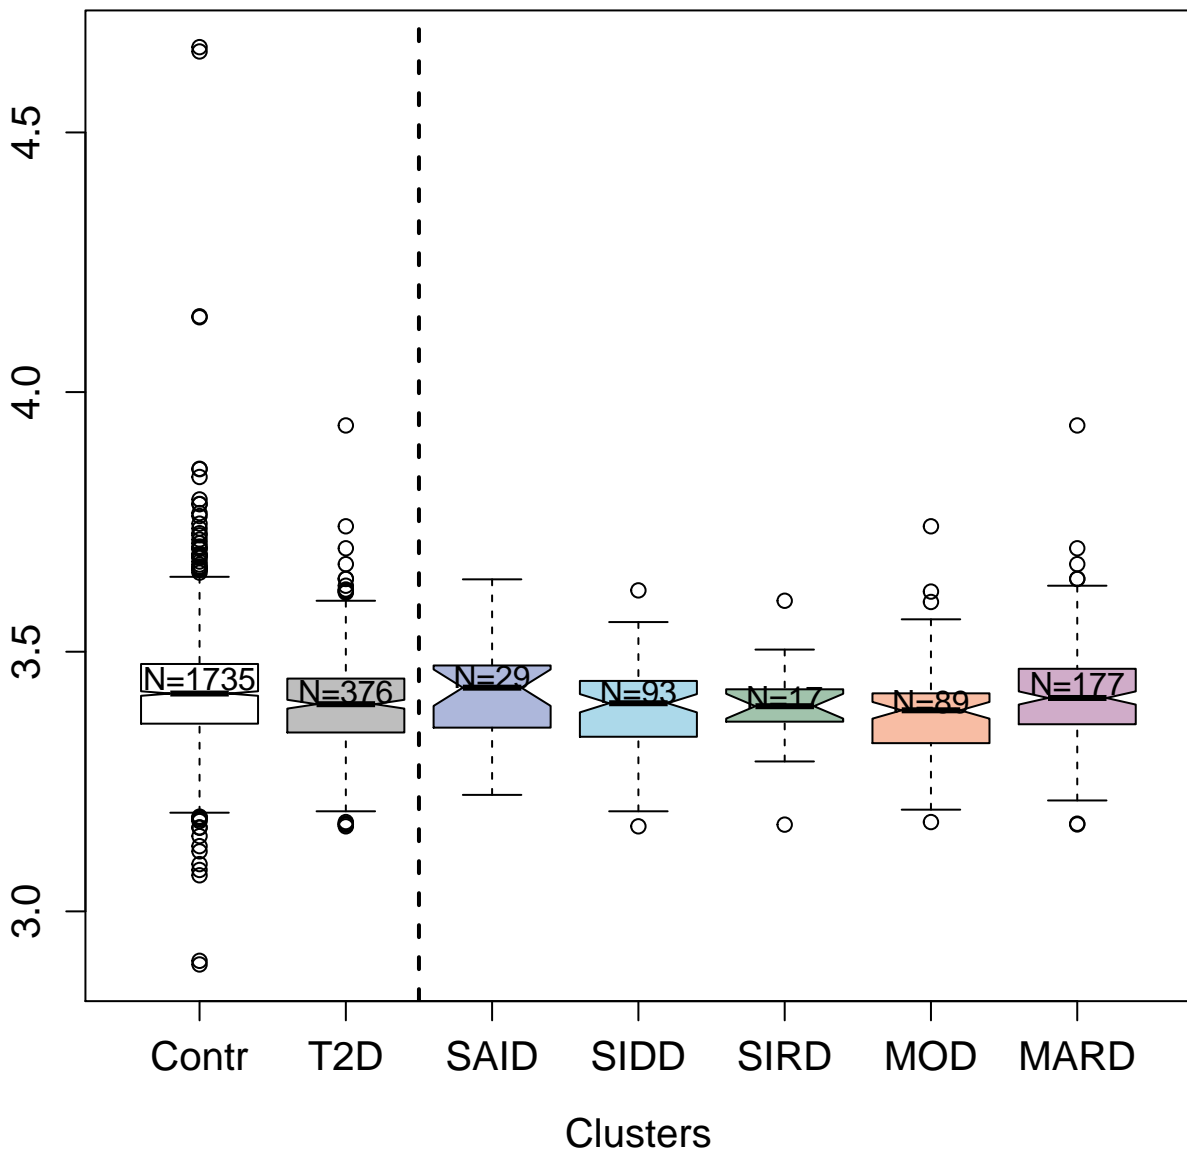

5482-61\_3 : Retinol-binding protein 4

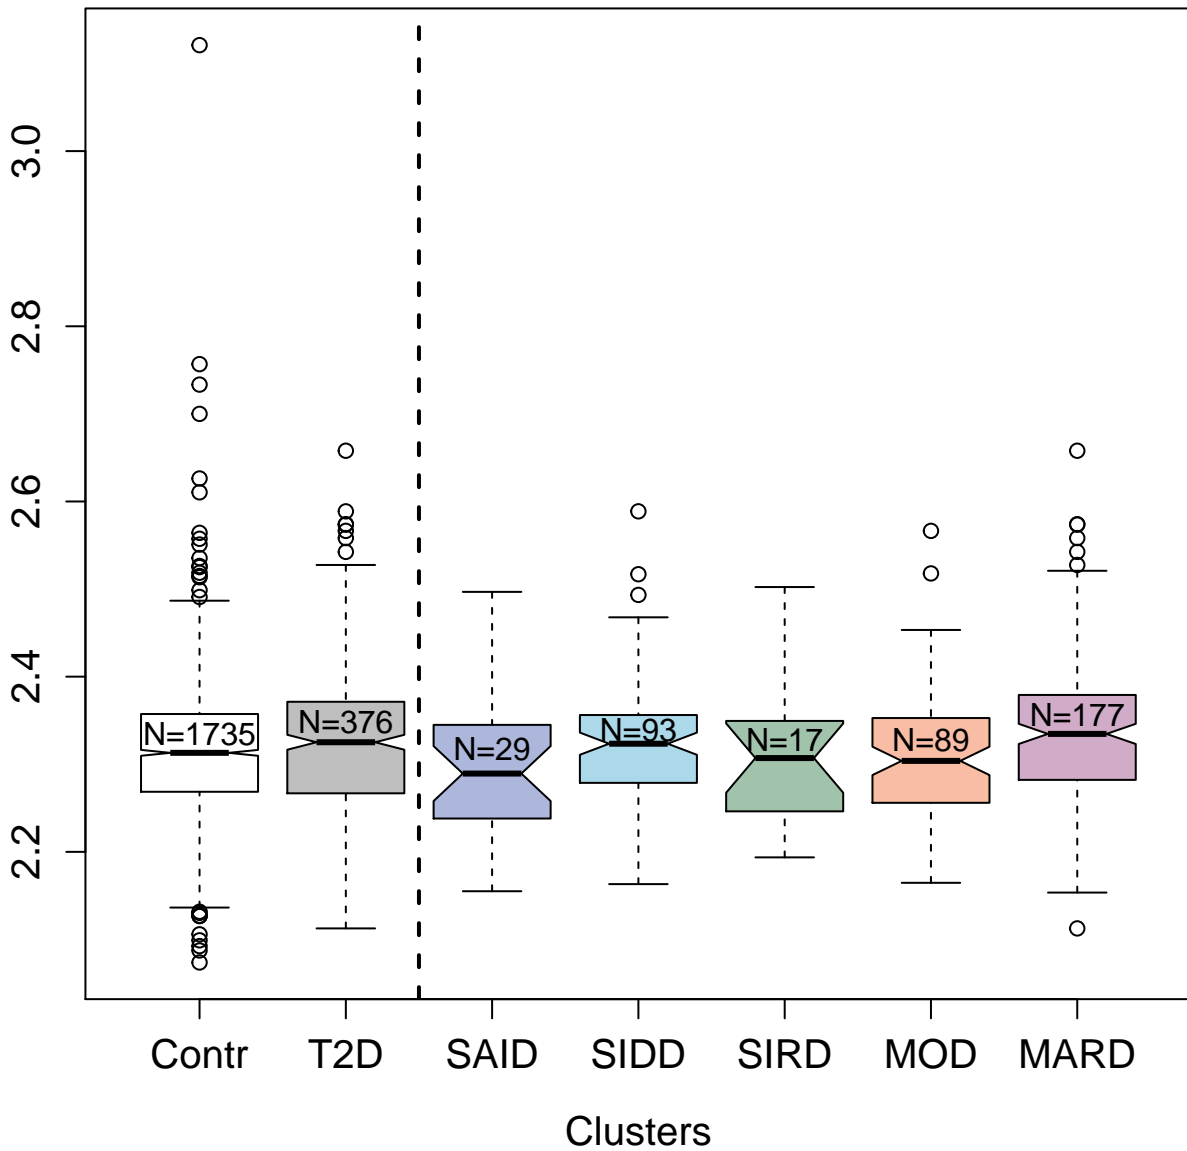

4545-53\_3 : Mitochondrial import inner membrane translocase subunit TIM14

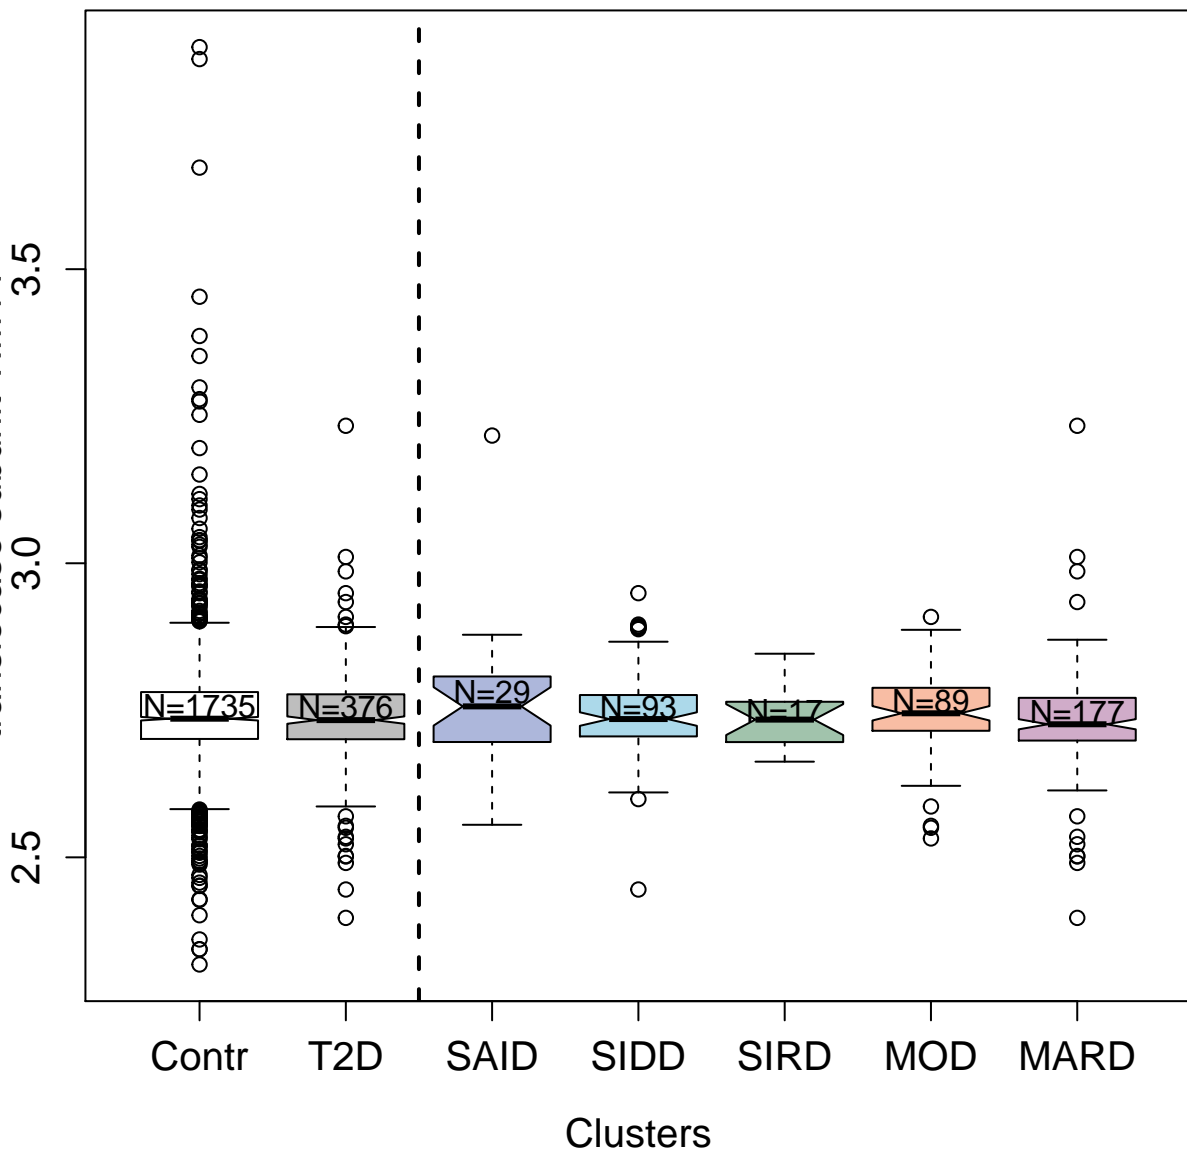

11098-1\_3 : Pyridoxal kinase

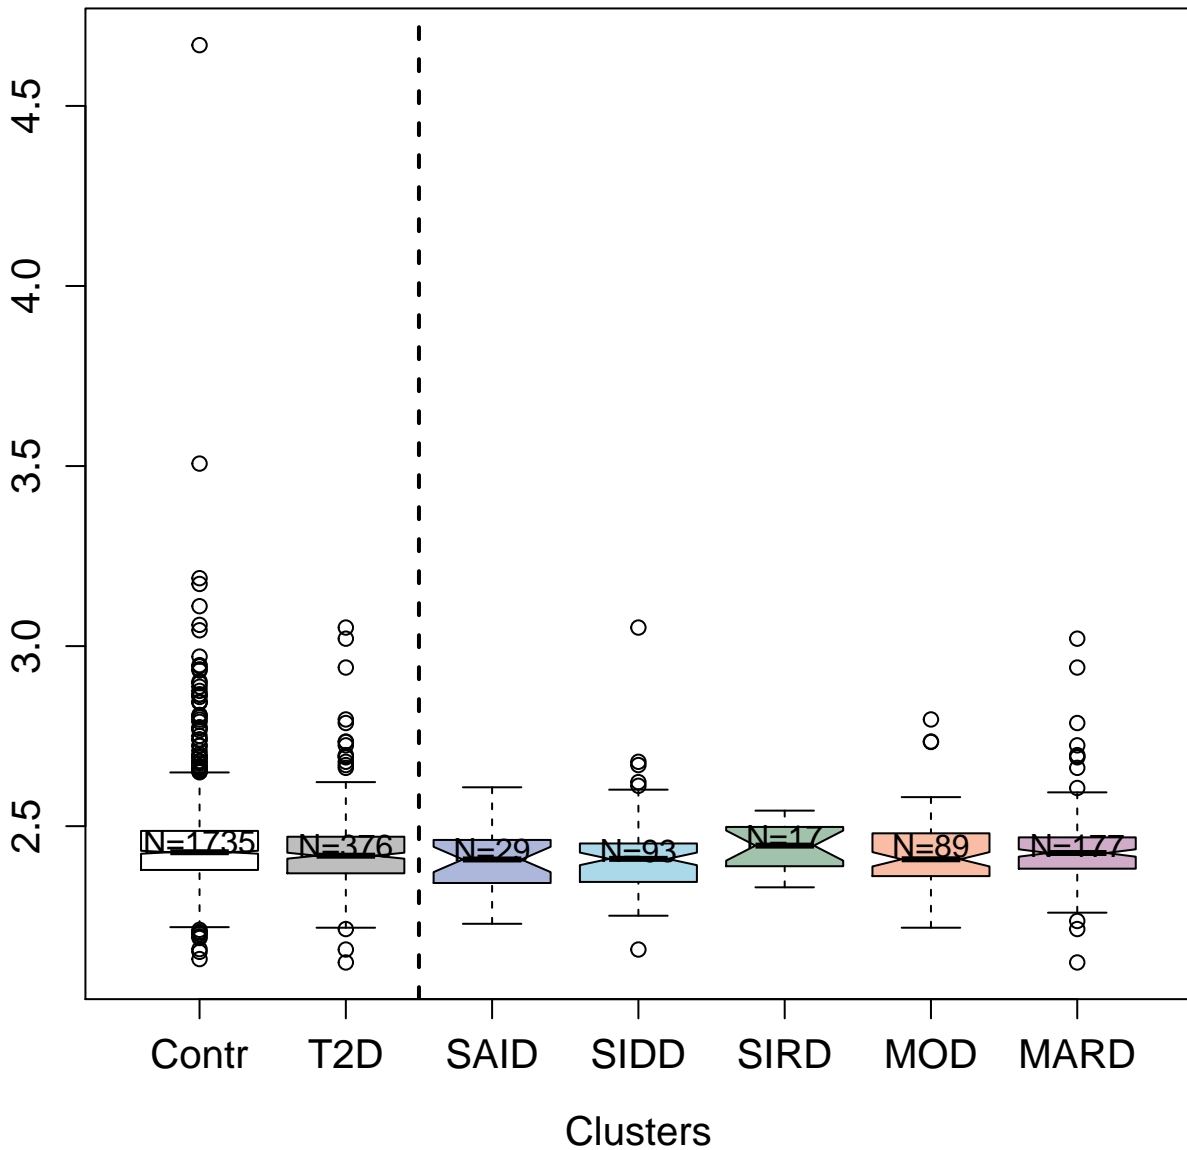

3612-6\_4 : Ephrin type-B receptor 4

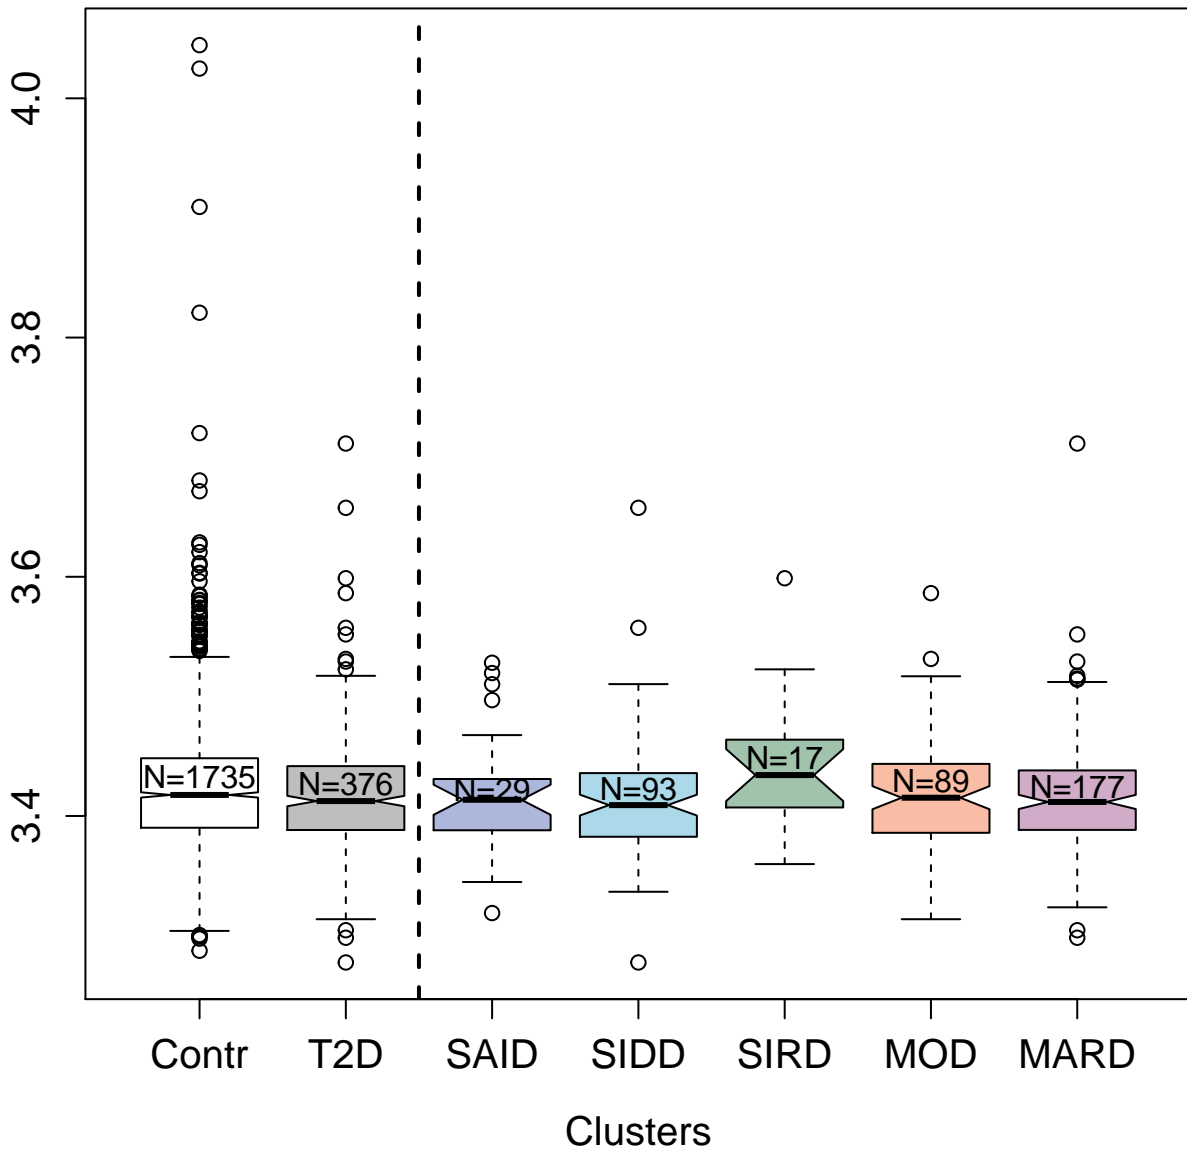

2747-3\_2 : NKG2D ligand 3

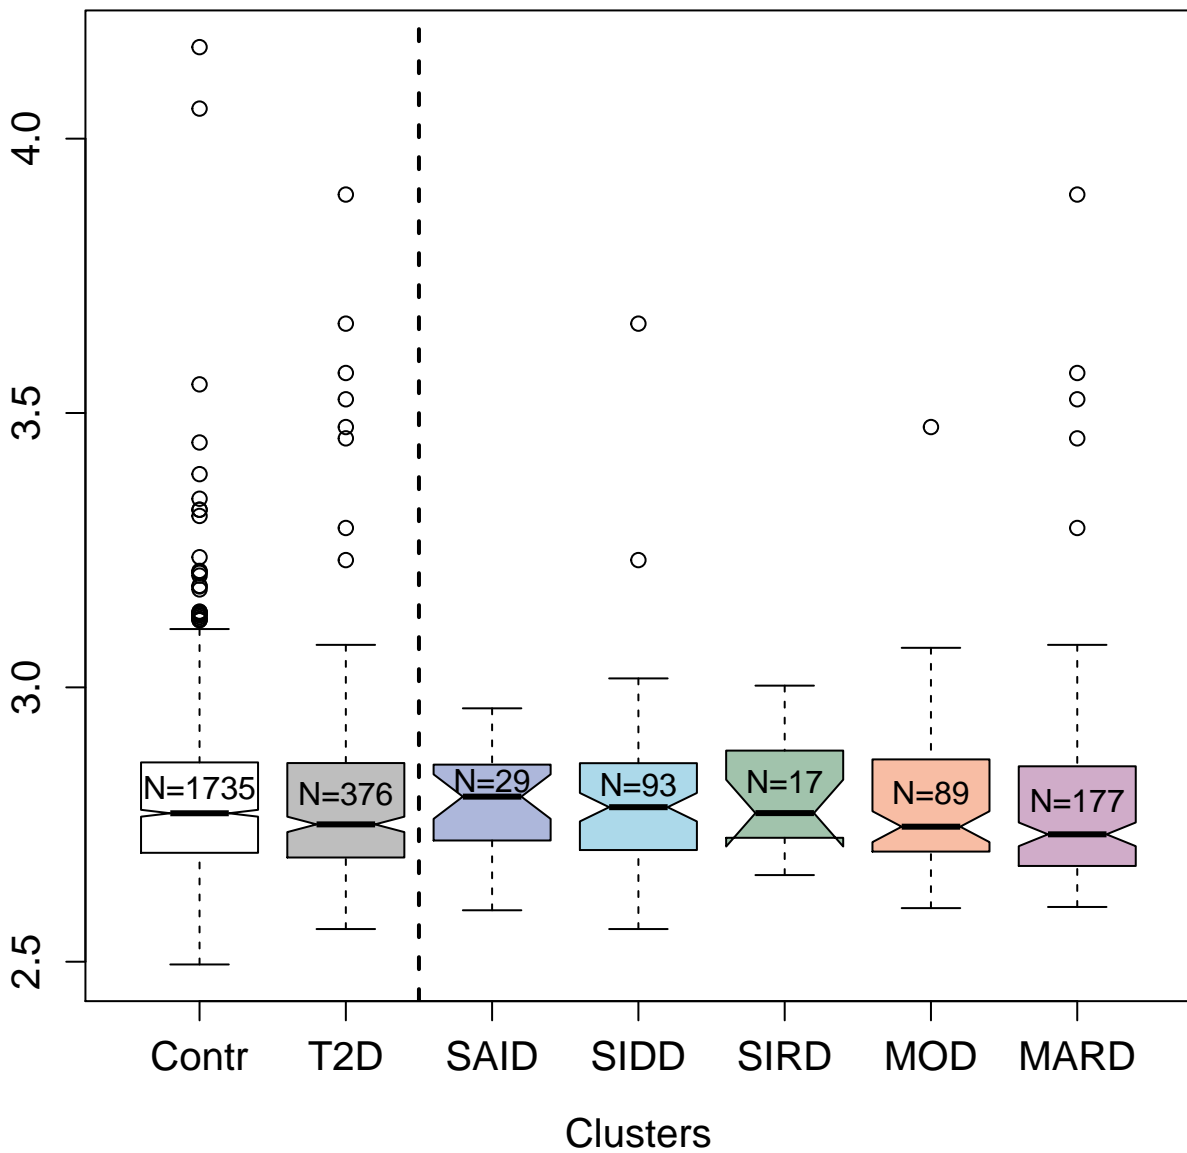



3708-62\_1 : Alpha-2-macroglobulin

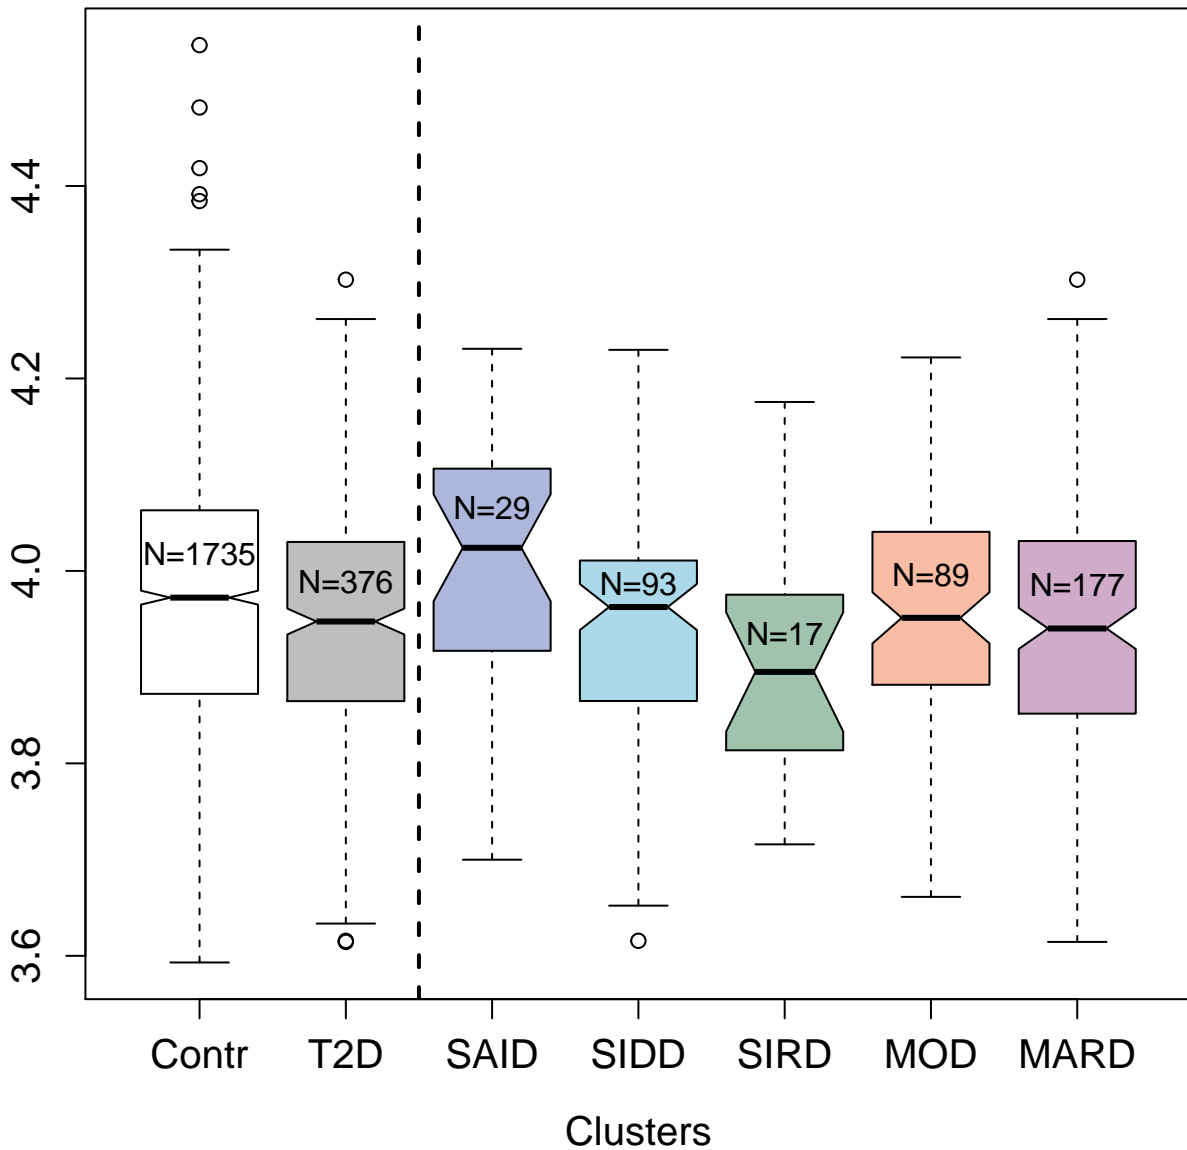

3317-33\_1 : Serine protease HTRA2; mitochondrial

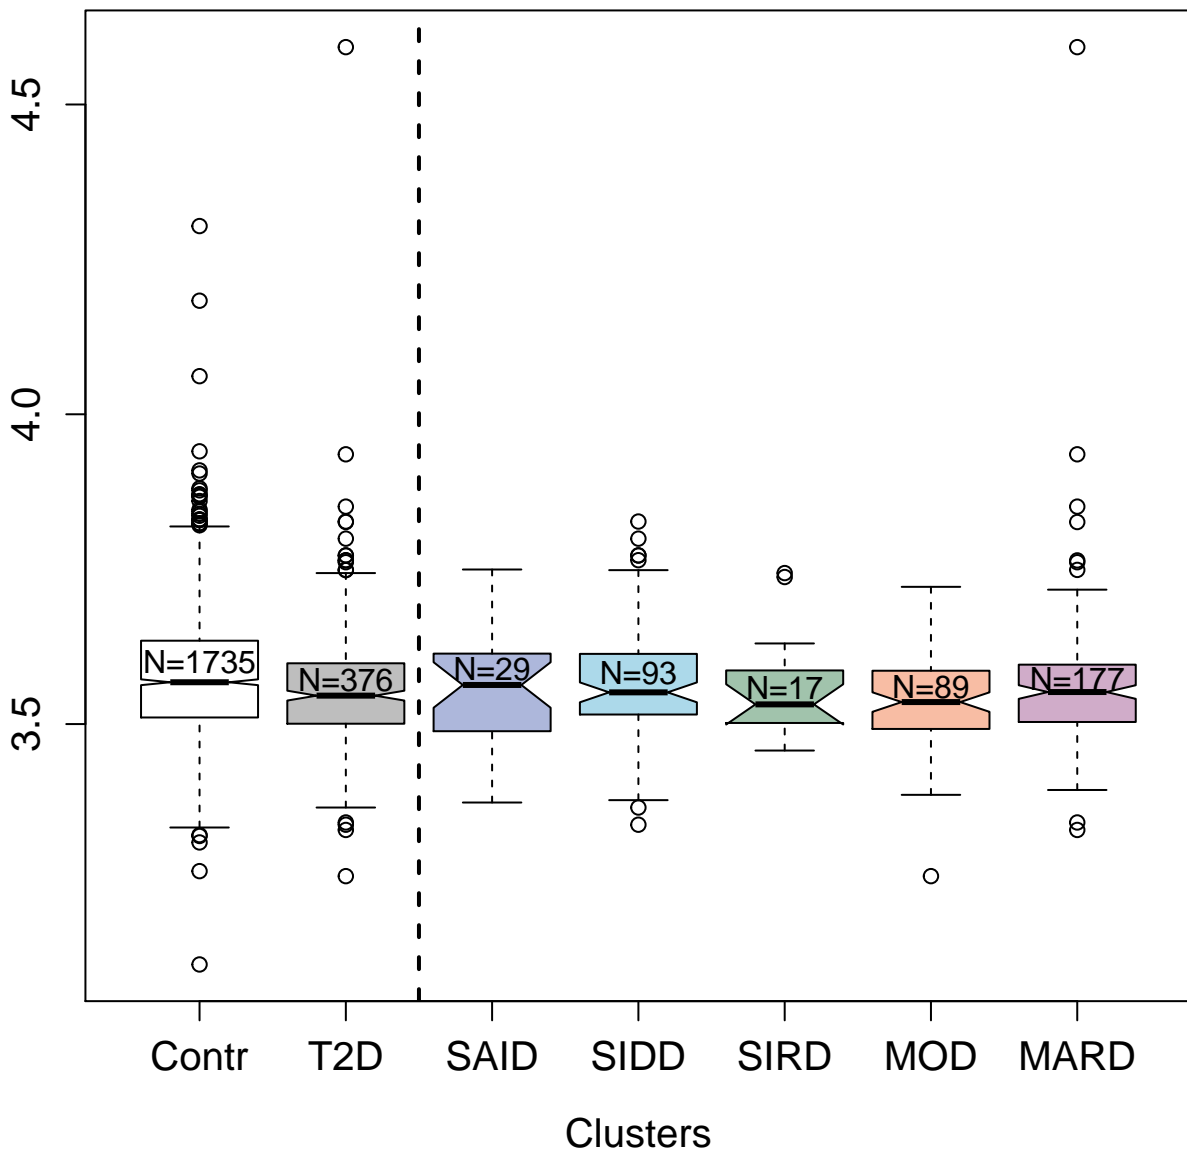

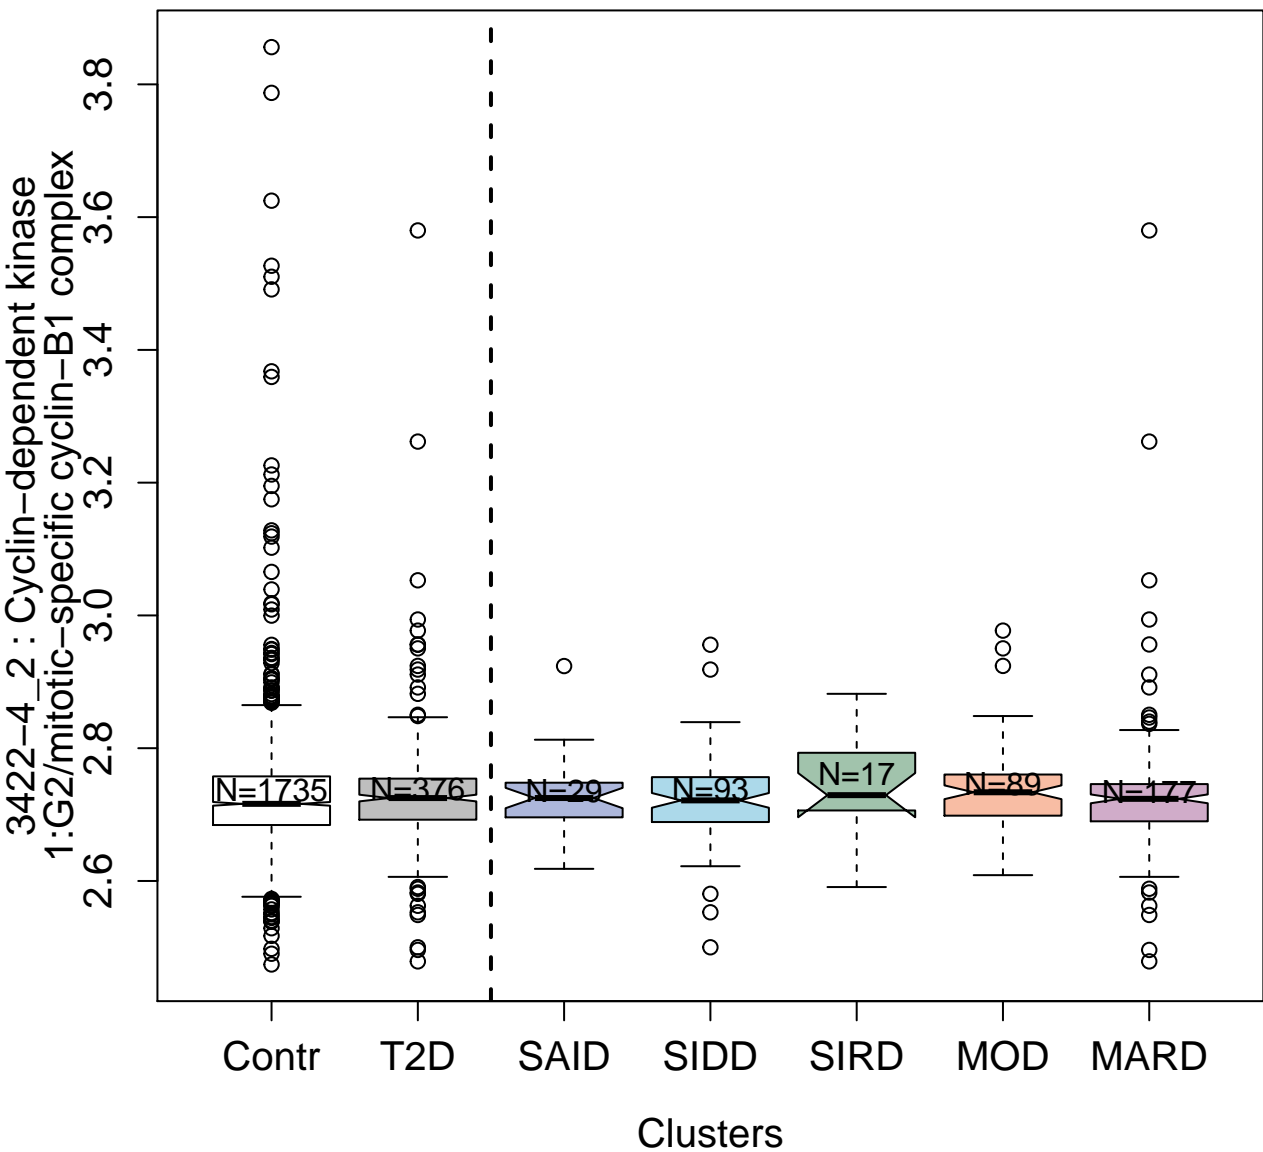

2732-58\_3 : Homeobox protein NANOG

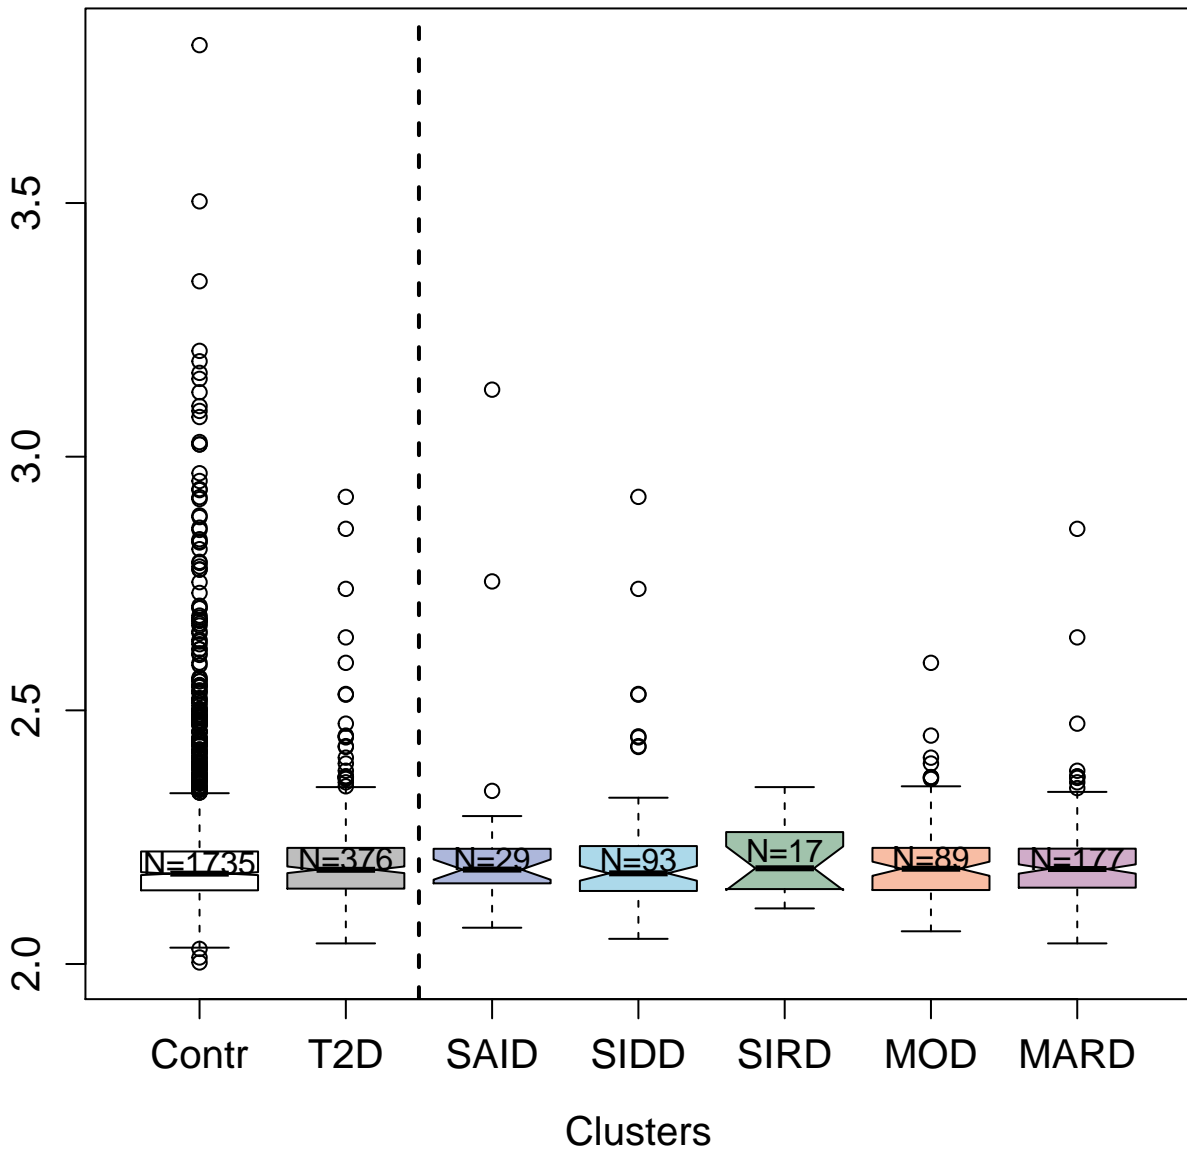

2632-5\_2 : Interleukin-12 receptor subunit beta-1

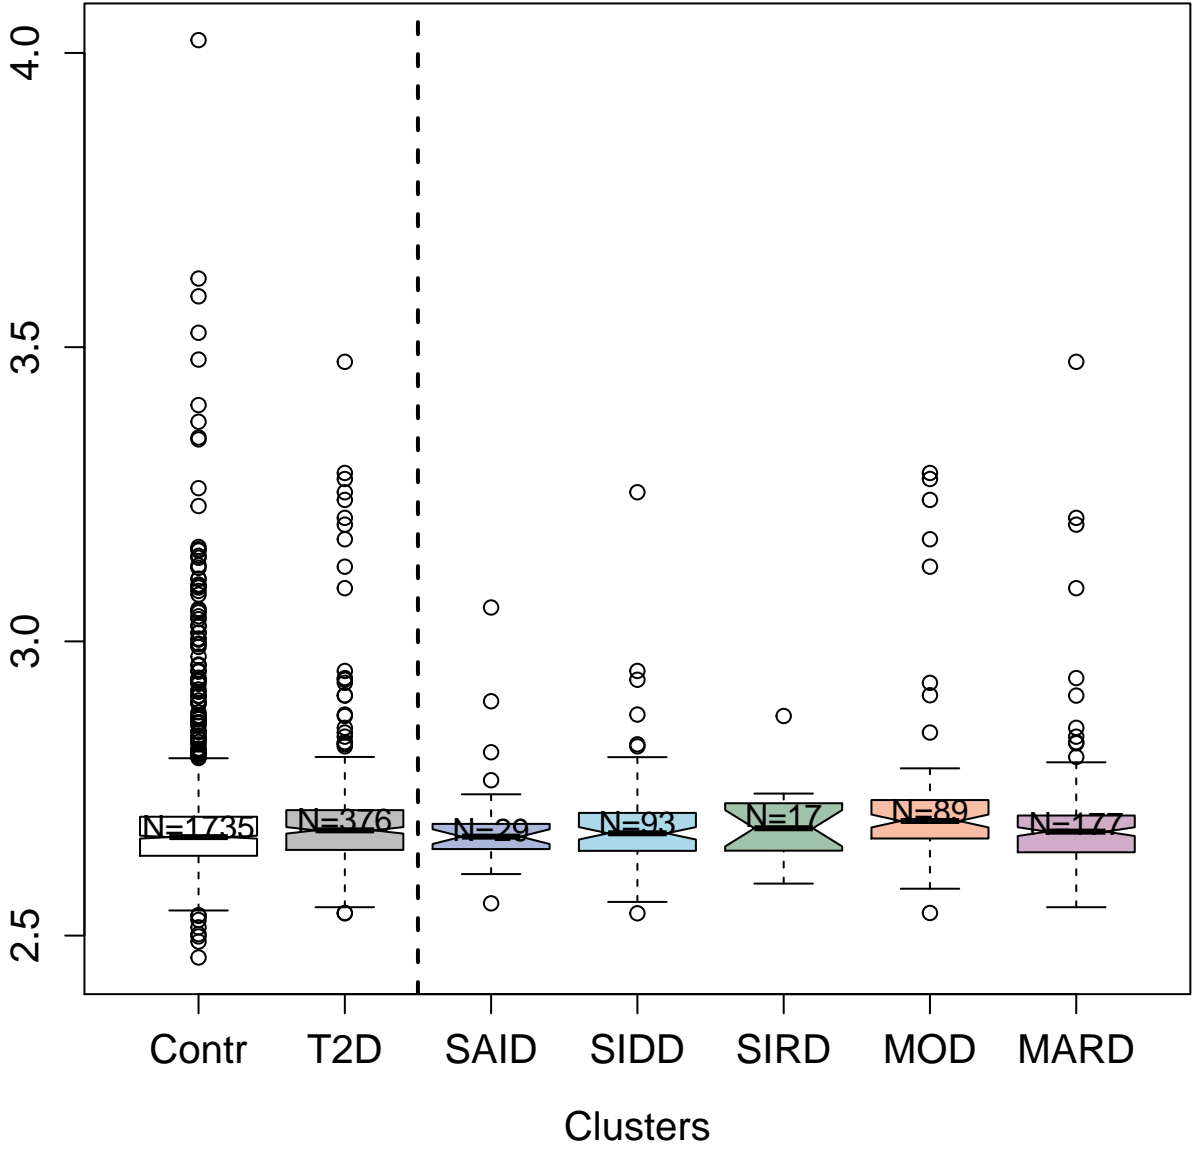

3497-13\_2 : Interferon alpha-2

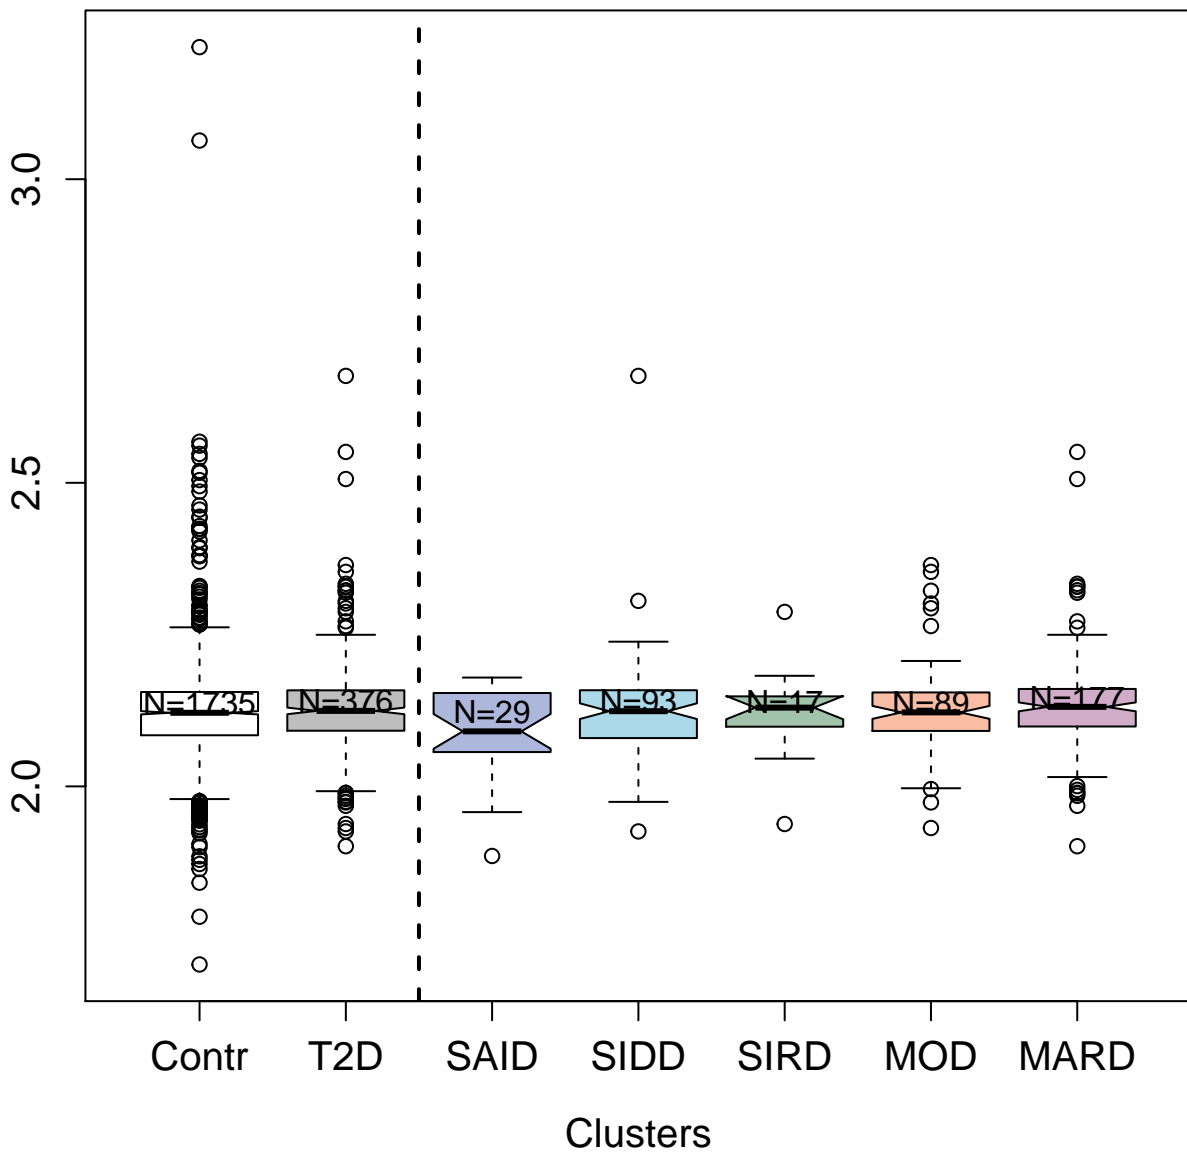

3216-2\_2 : Polymeric immunoglobulin receptor

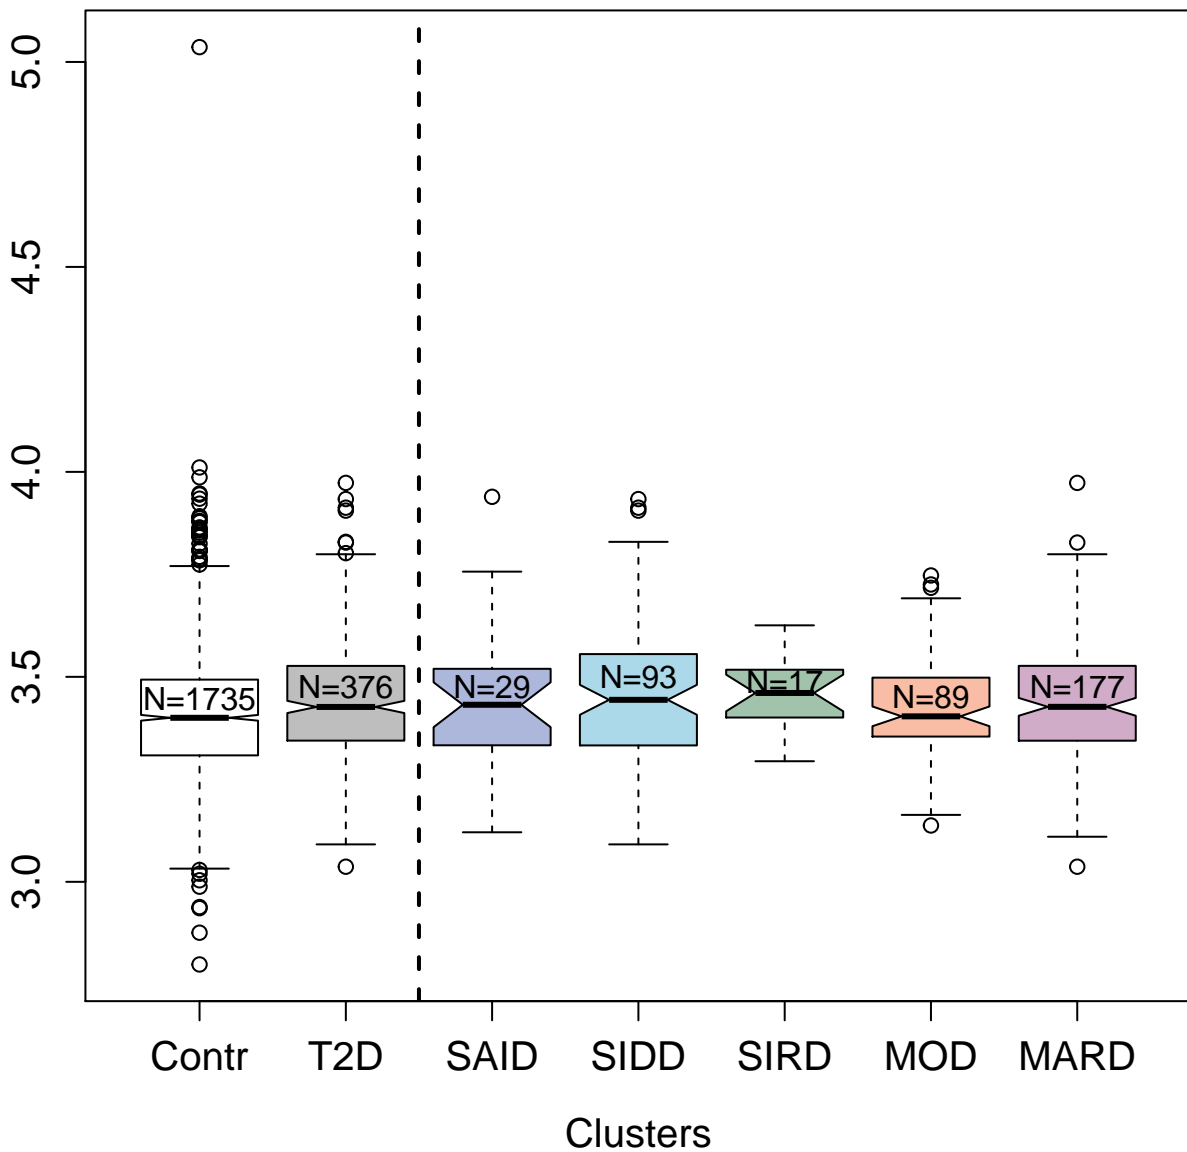

3222-11\_2 : Semaphorin-3A

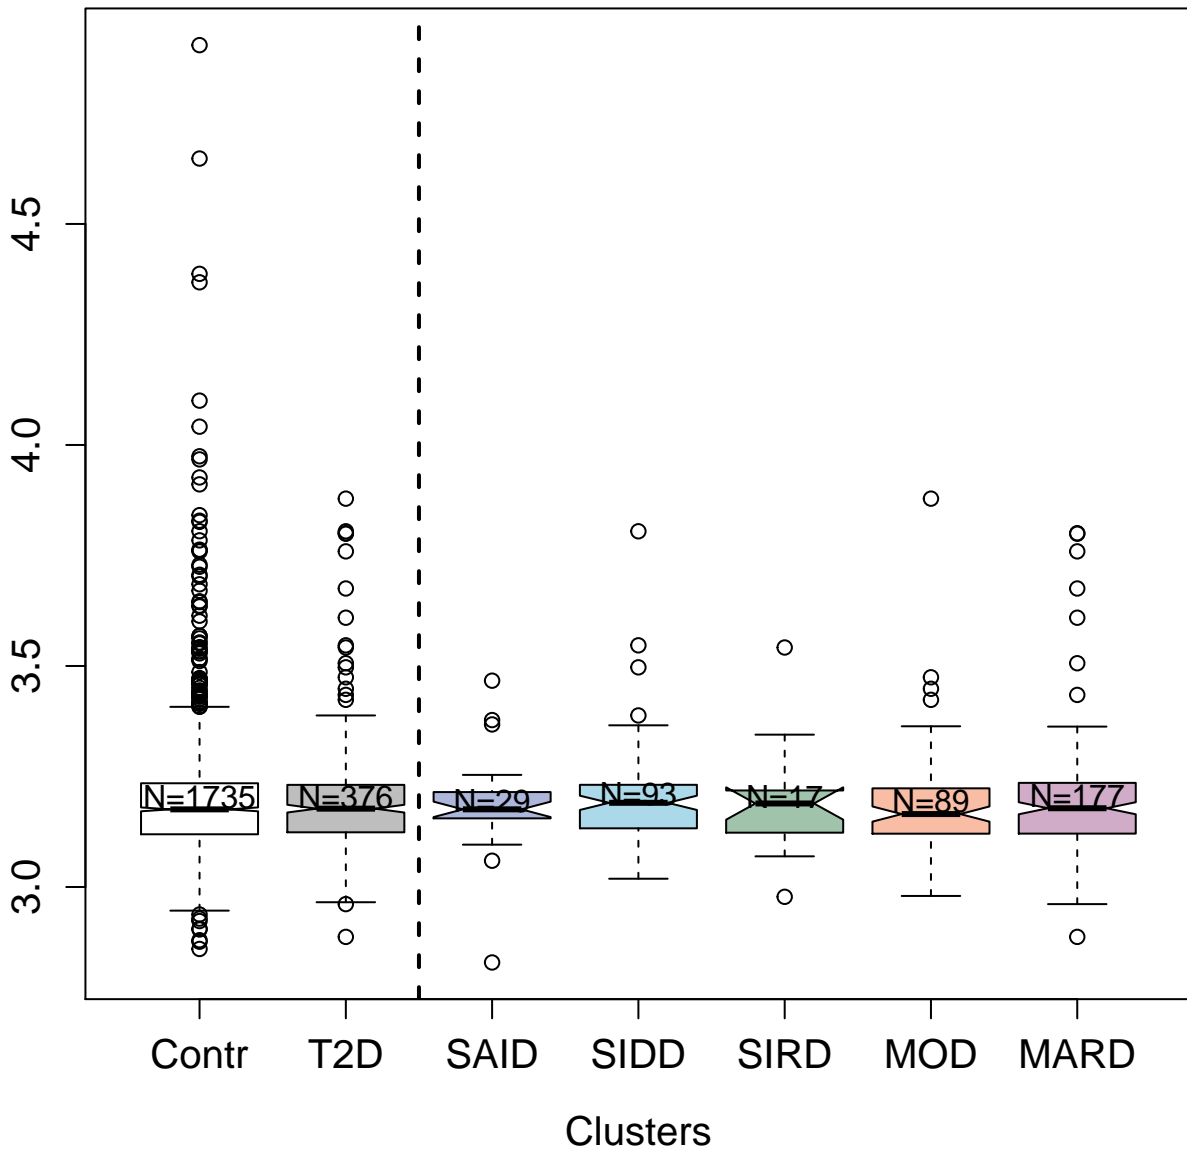



4135-84\_2 : Immunoglobulin E

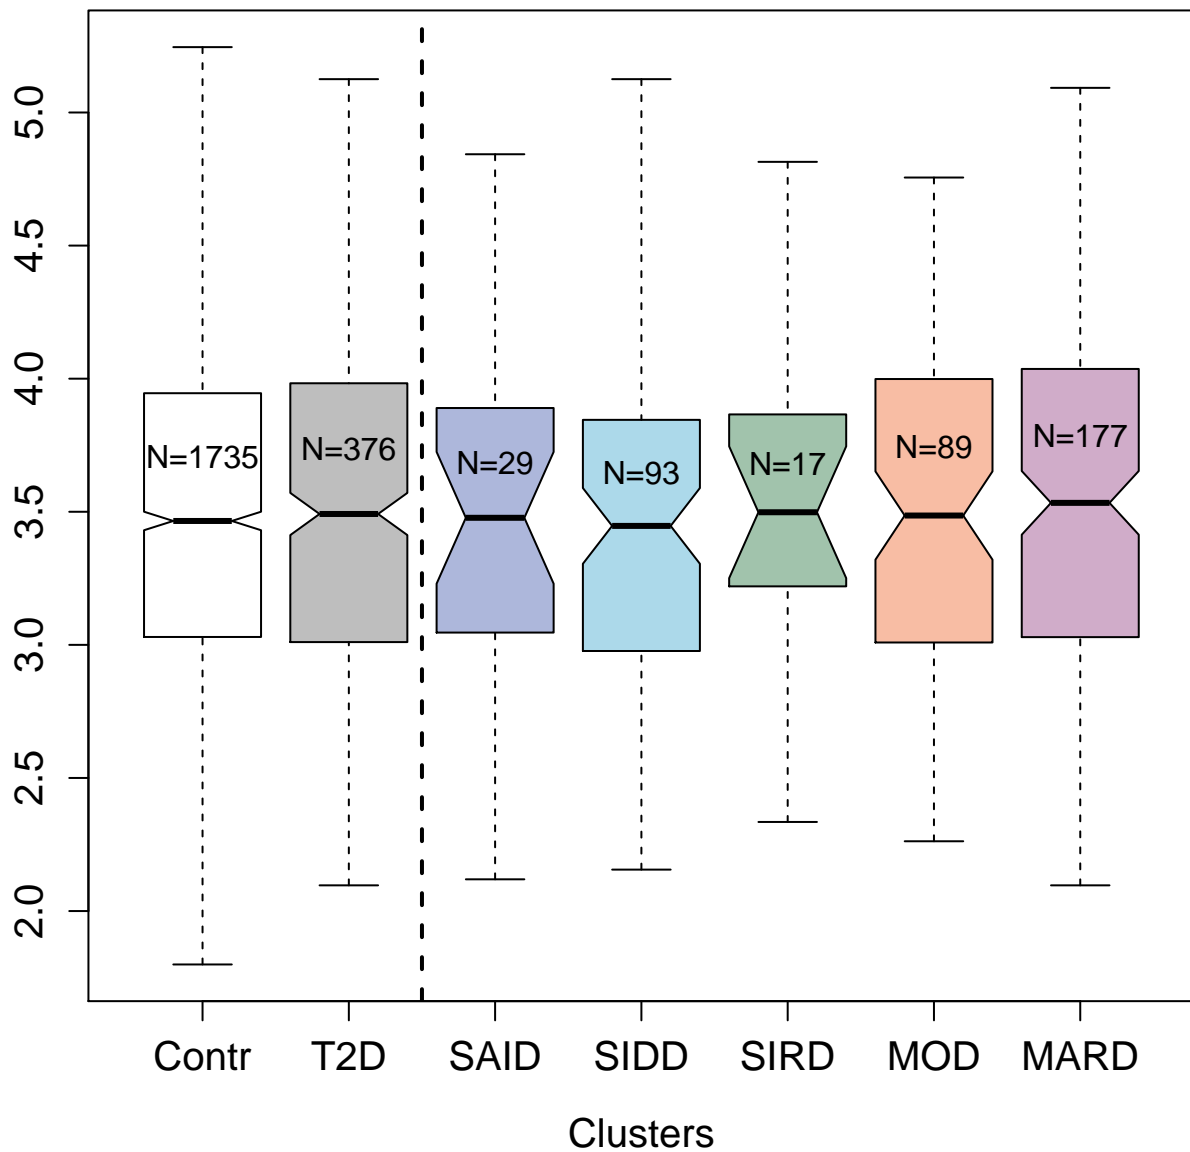

2692-74\_2 : Phospholipase A2; membrane associated

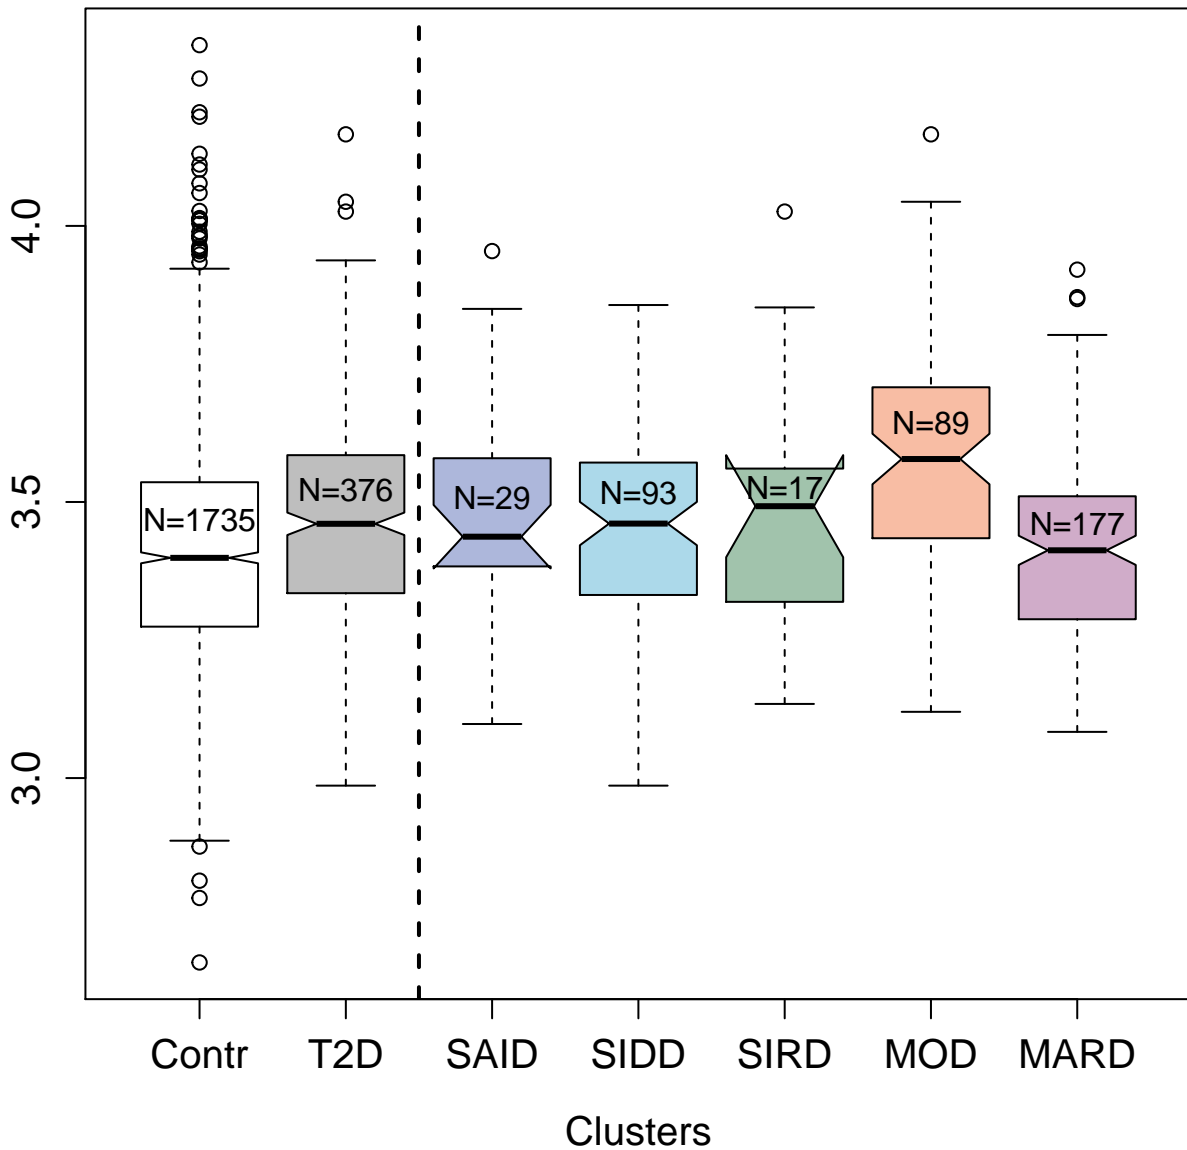

2333-72\_1 : Transforming growth factor beta-1

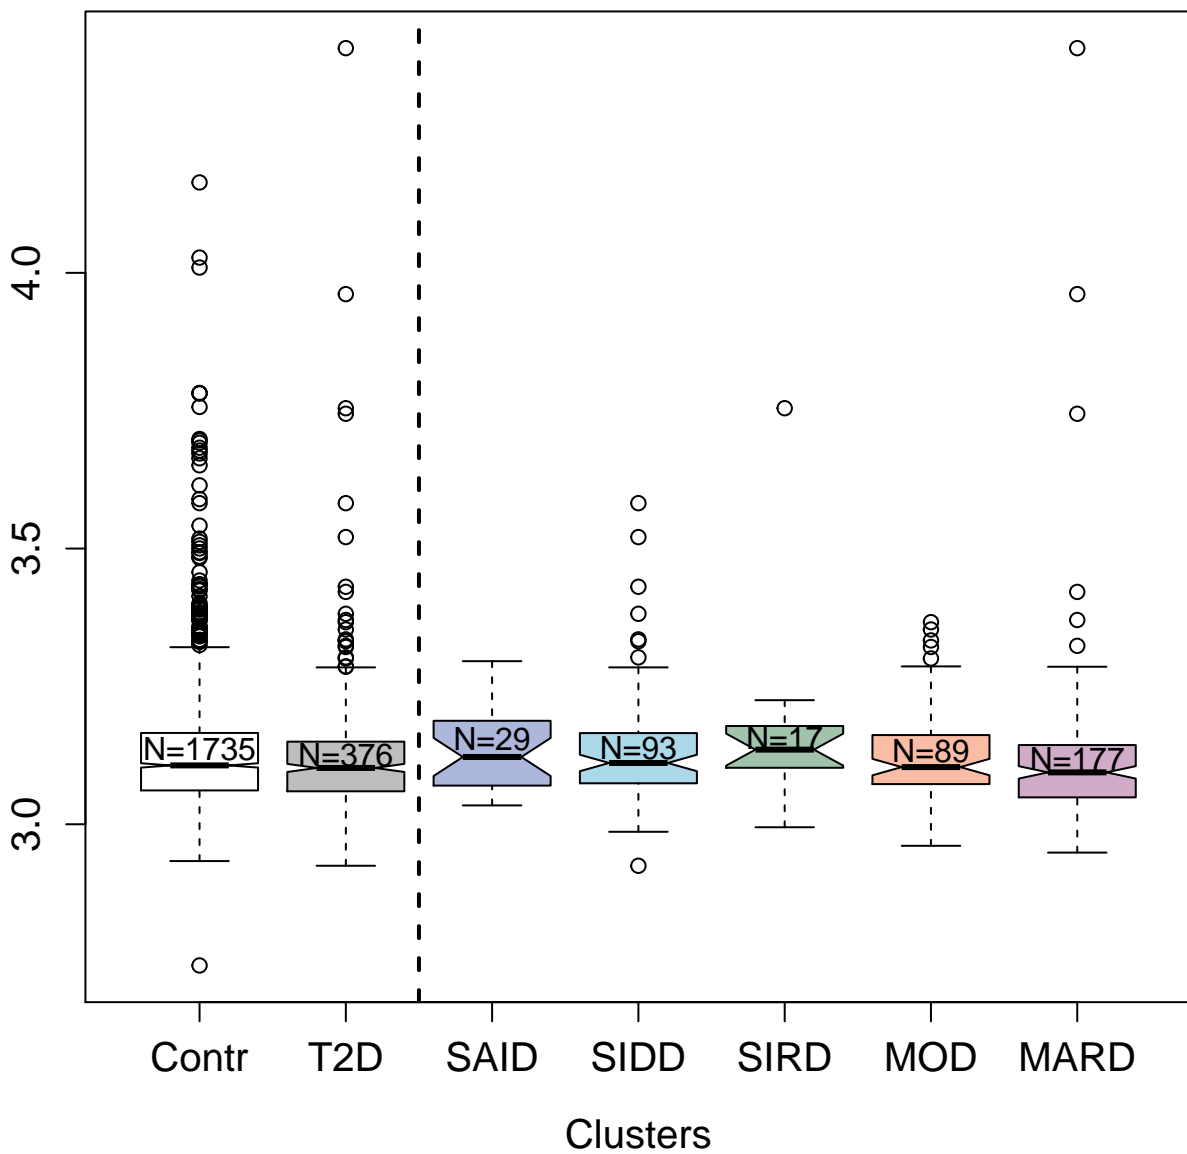

3166-92\_1 : Myeloid cell surface antigen CD33

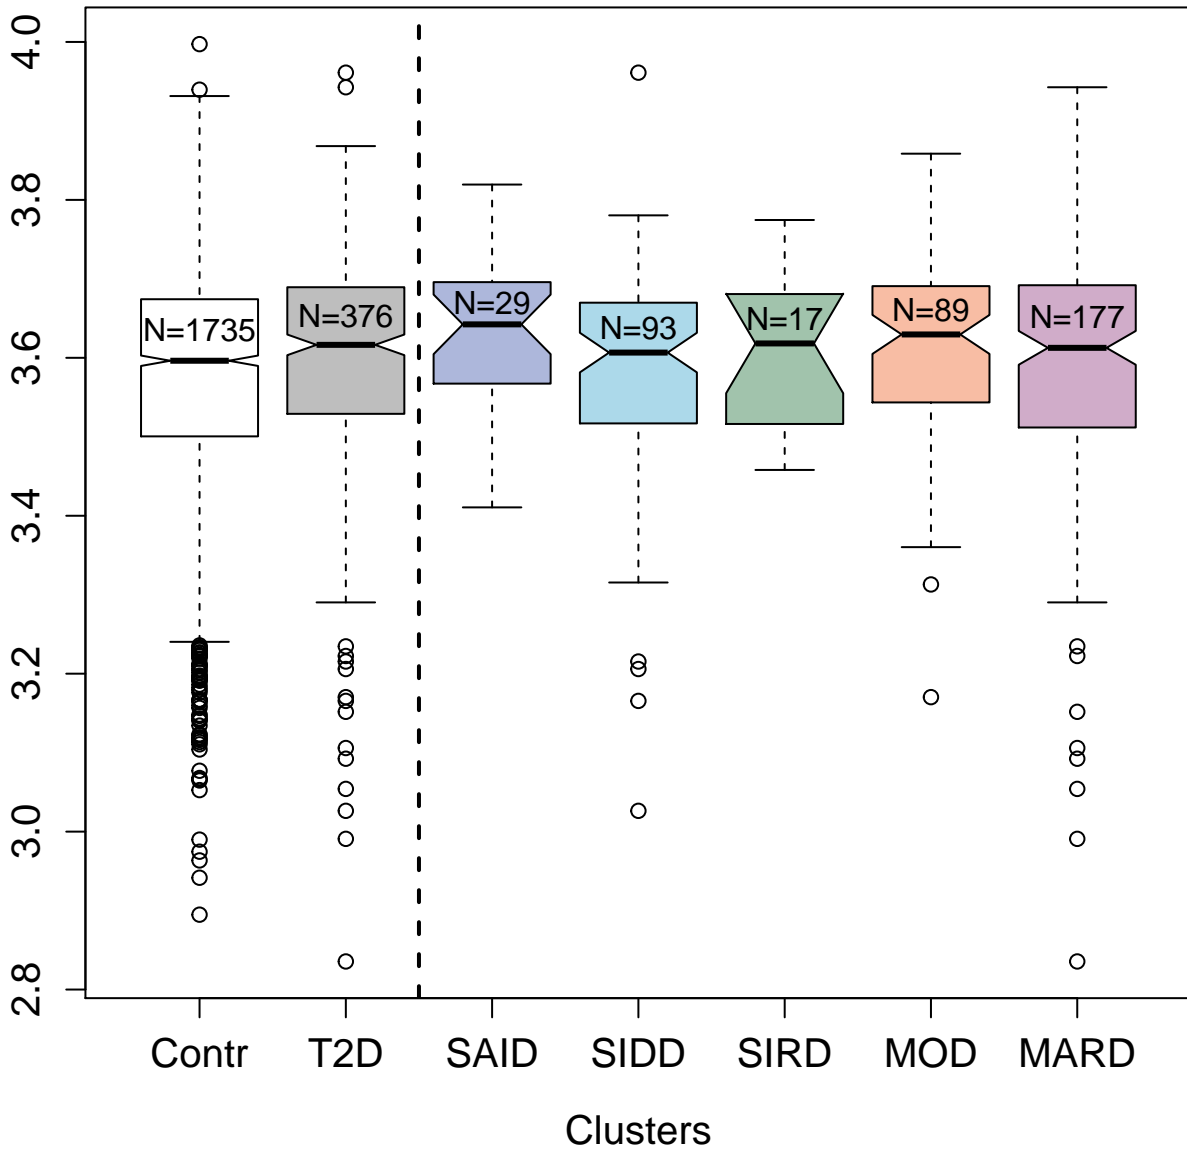

9168-31\_3 : C-C motif chemokine 26

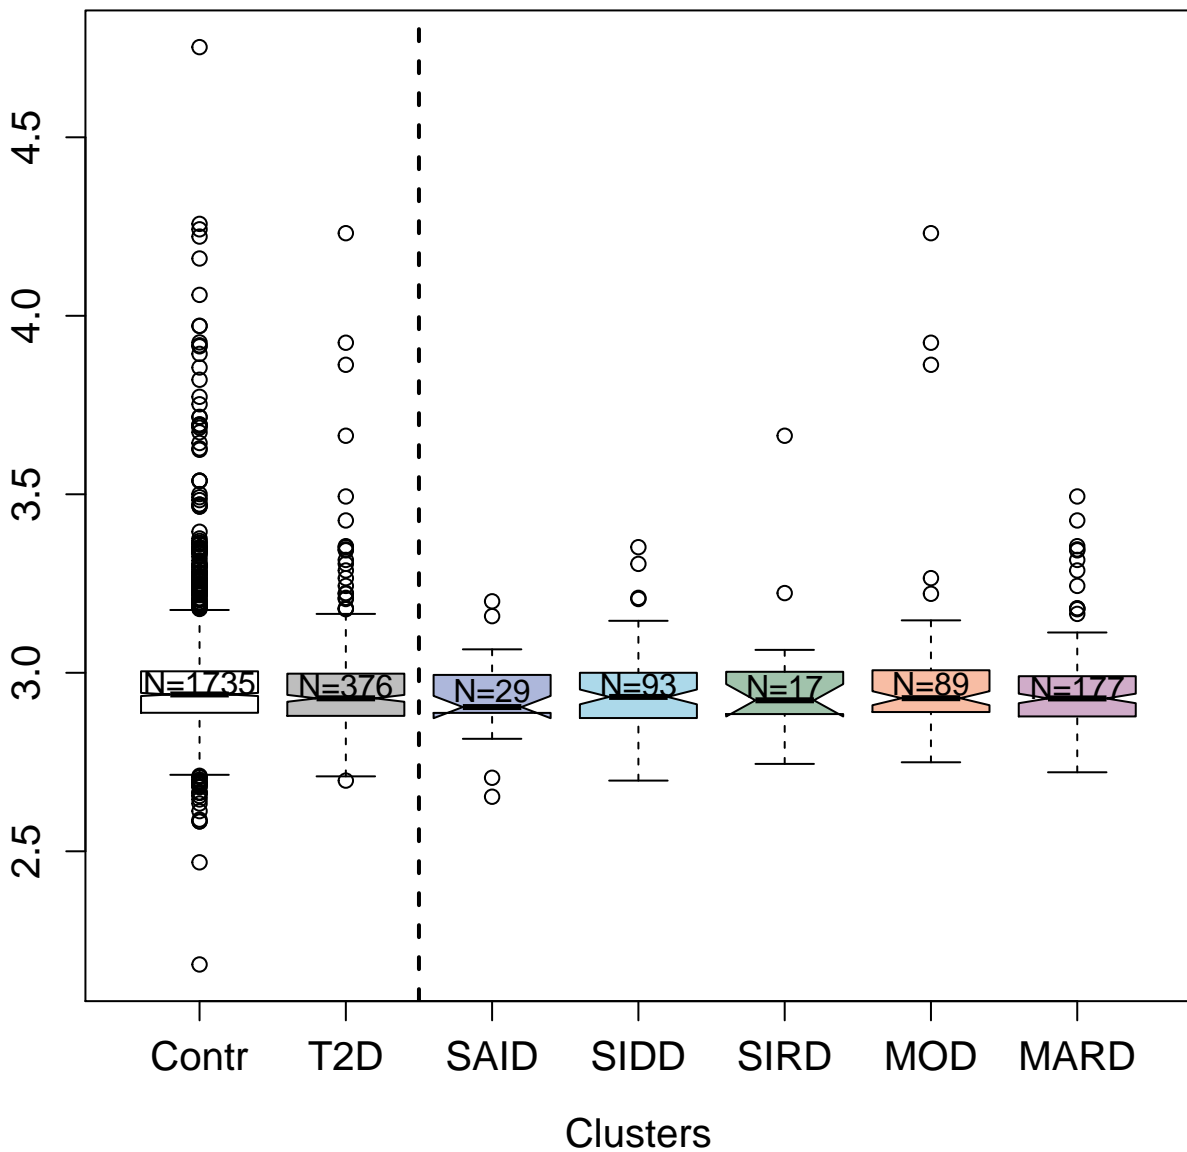

5846-24\_3 : Noggin

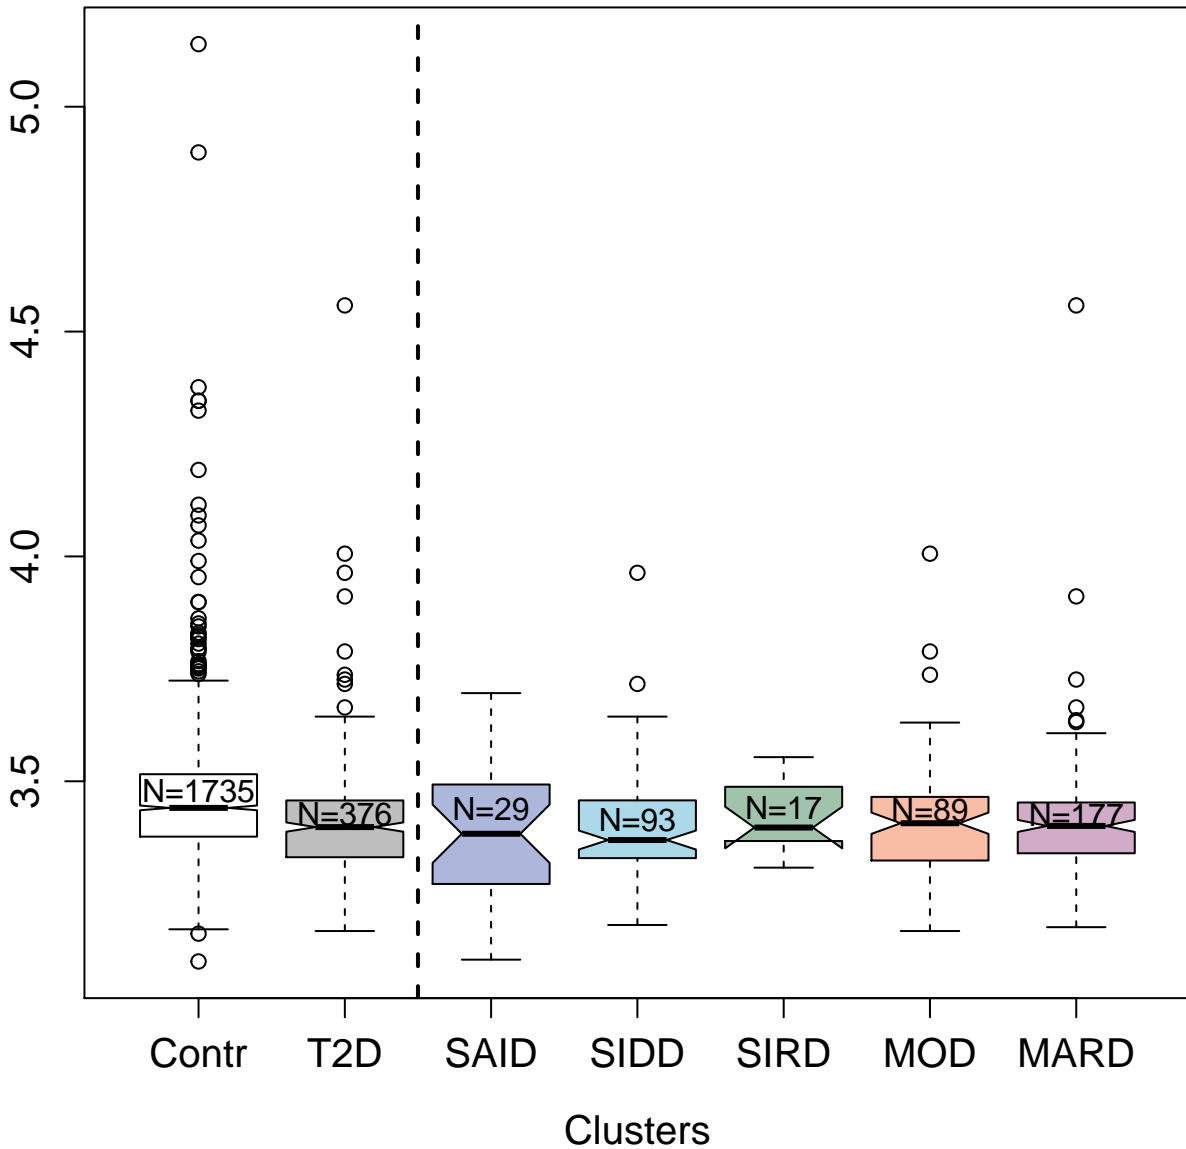

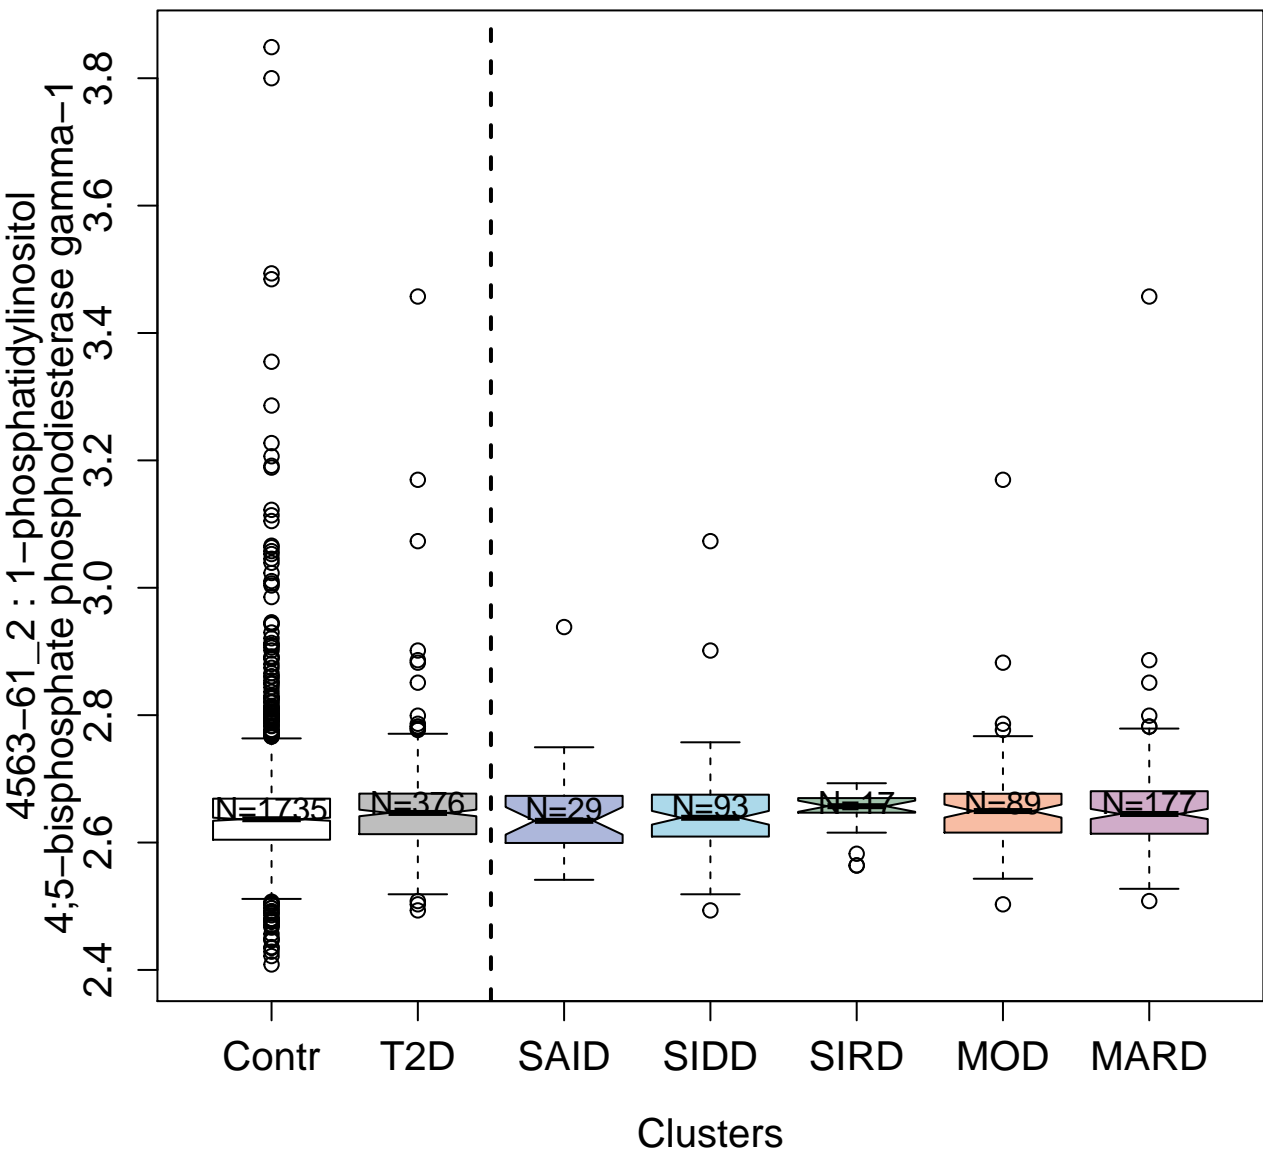





3324-51\_1 : T-lymphocyte surface antigen Ly-9

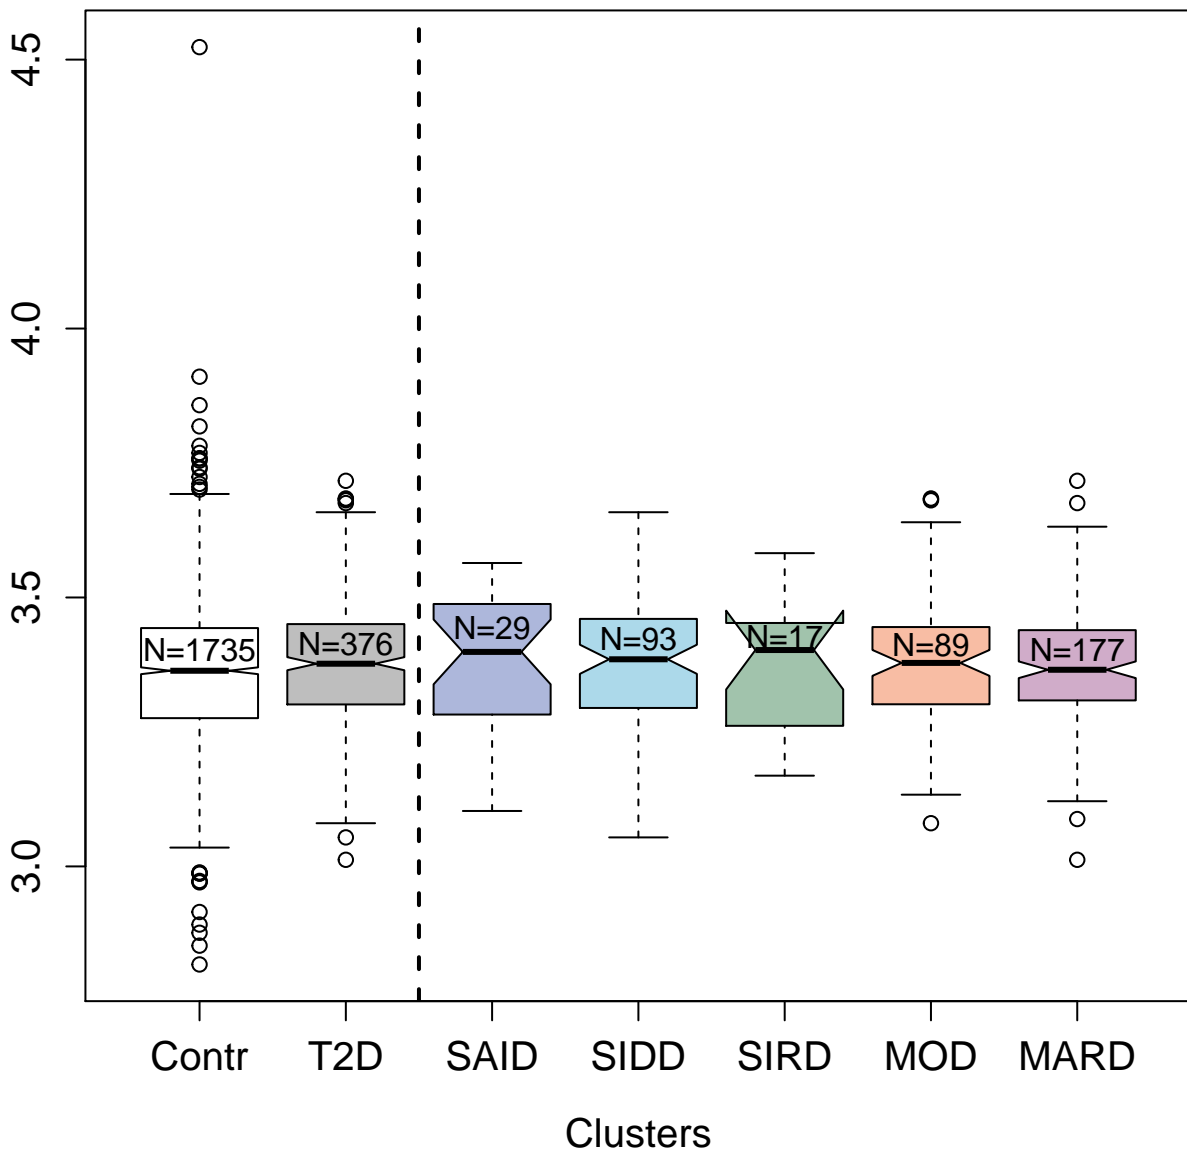

2708-54\_2 : Tumor necrosis factor ligand  
superfamily member 18

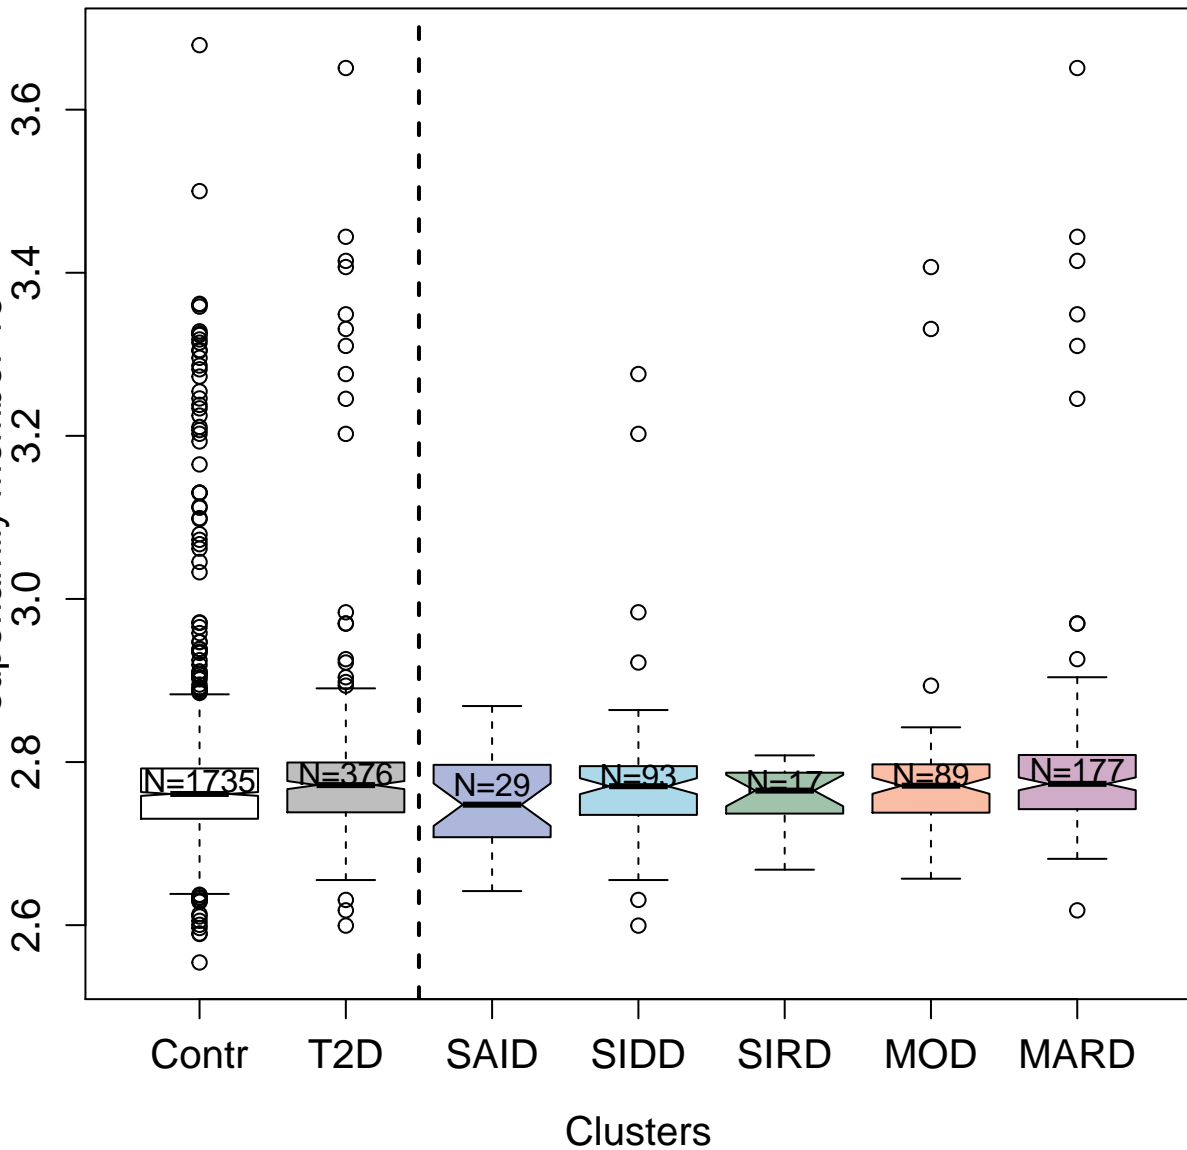

2623-54\_4 : Protein E7\_HP16

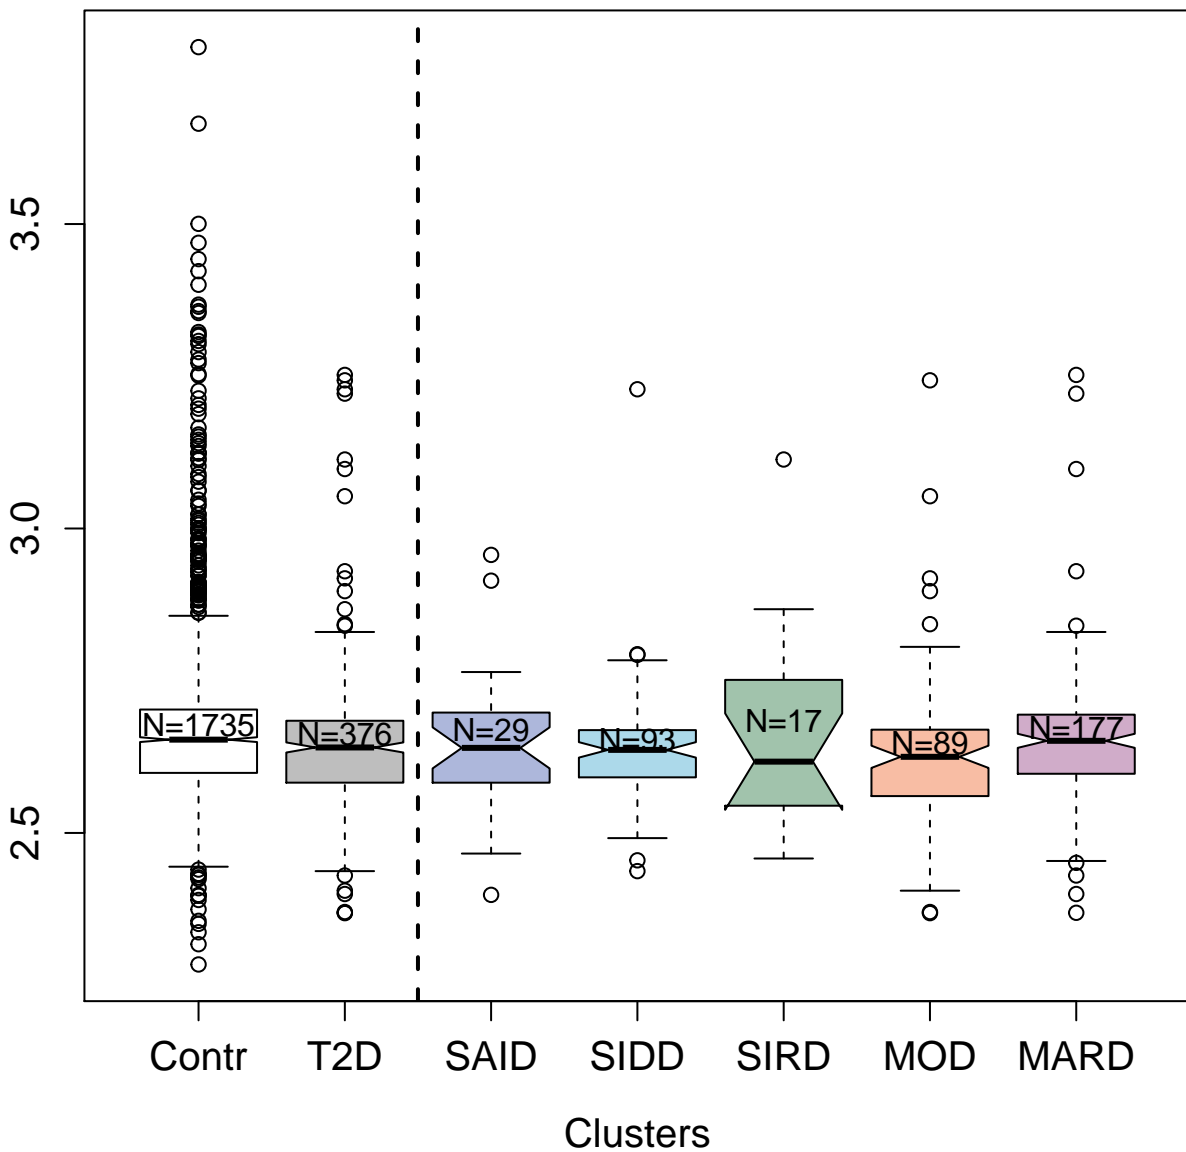

14149-9\_3 : Interleukin-36 beta

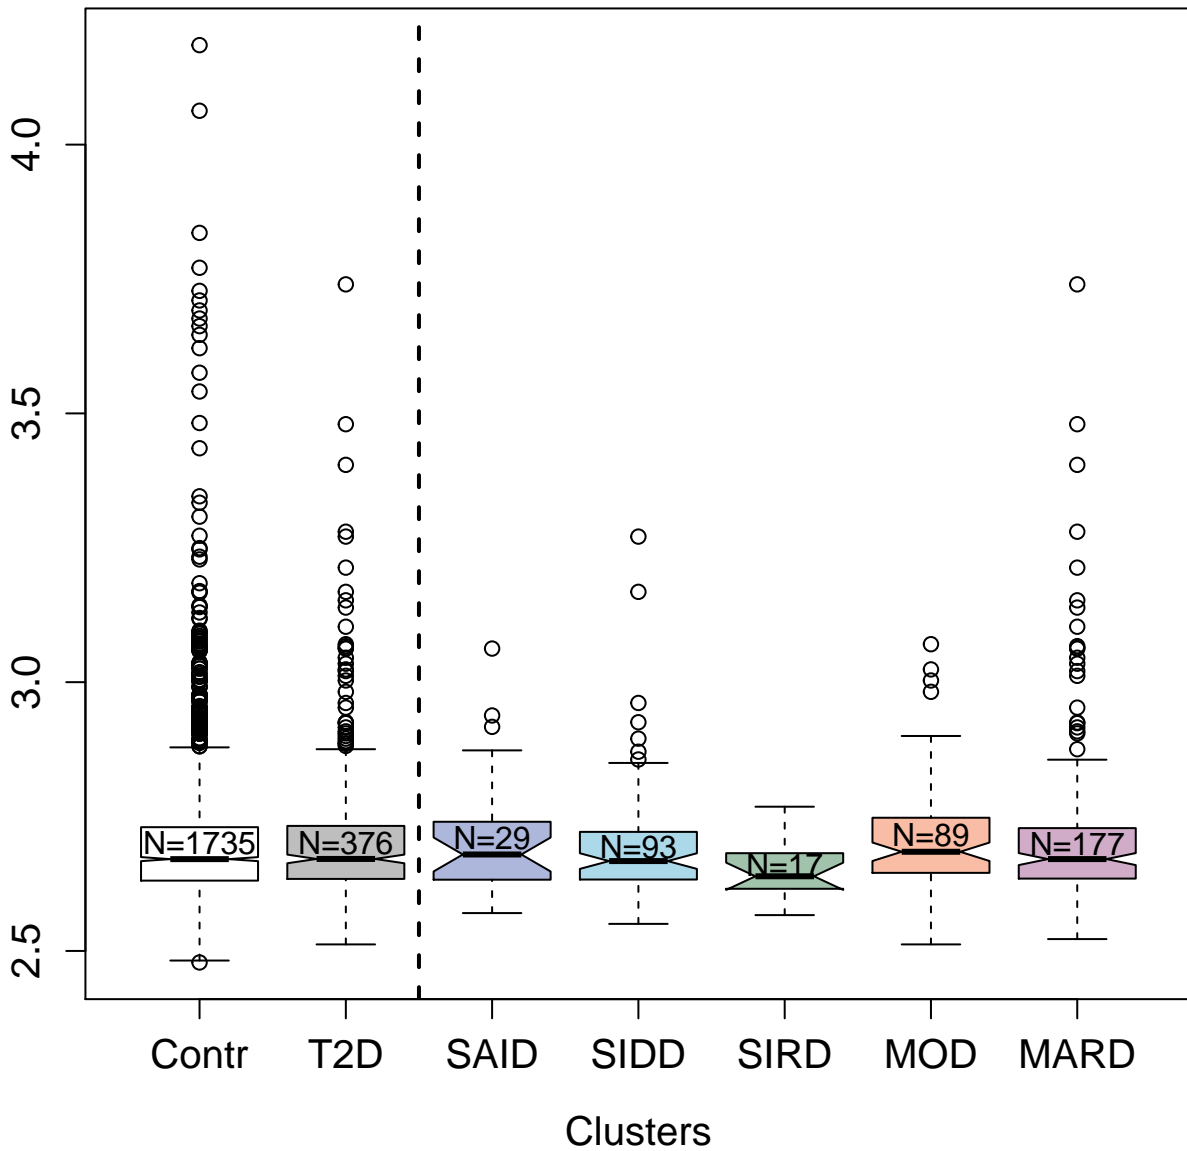

2652-15\_1 : Urokinase plasminogen activator surface receptor

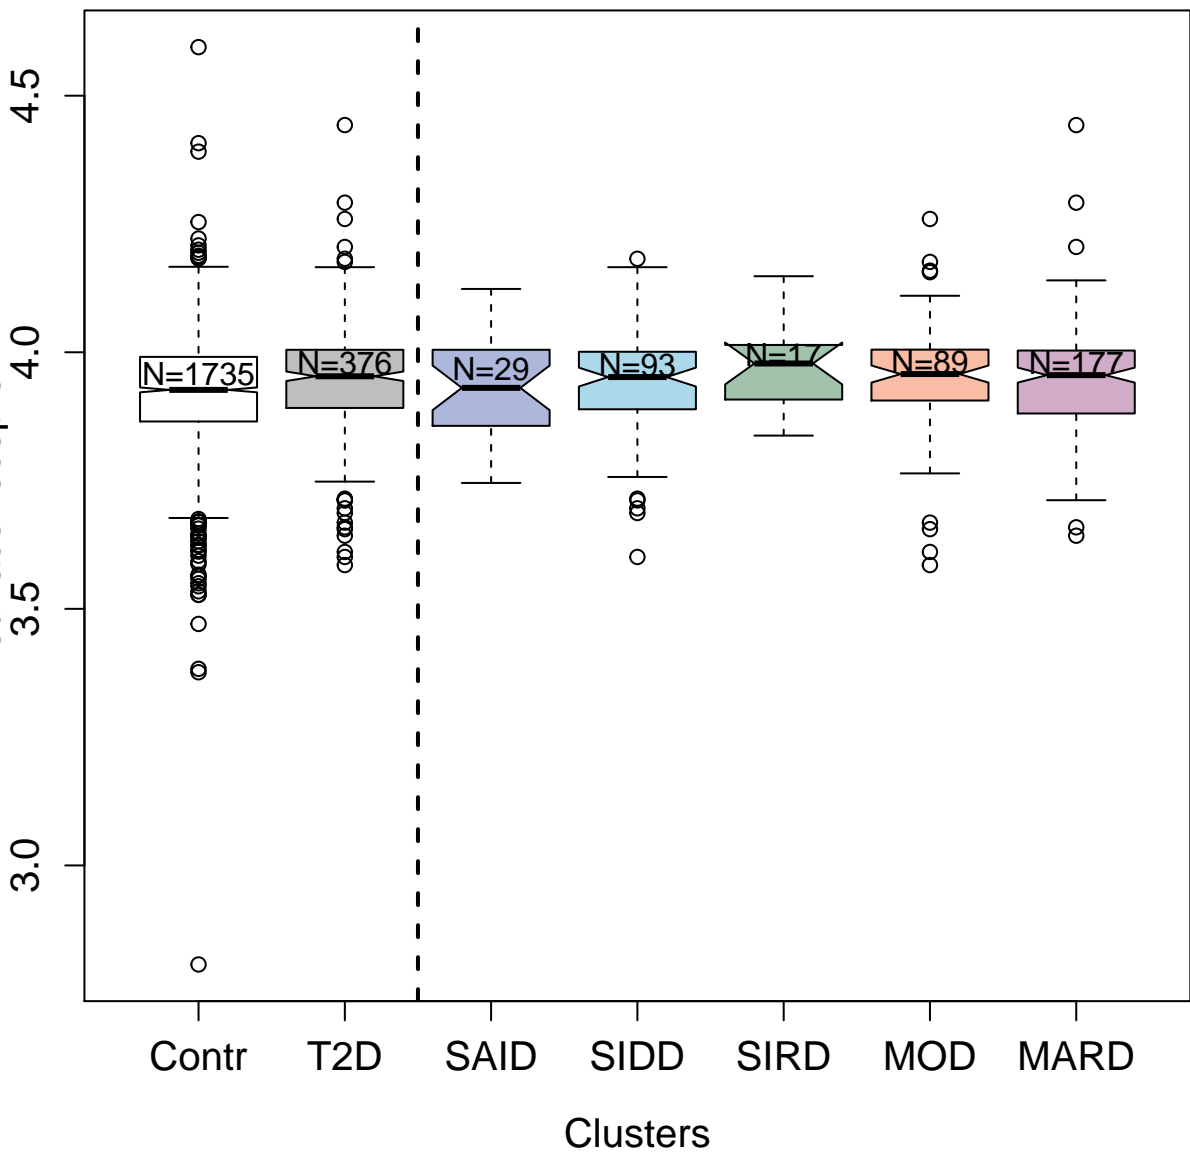

5534-49\_2 : Tumor necrosis factor receptor  
superfamily member 10B

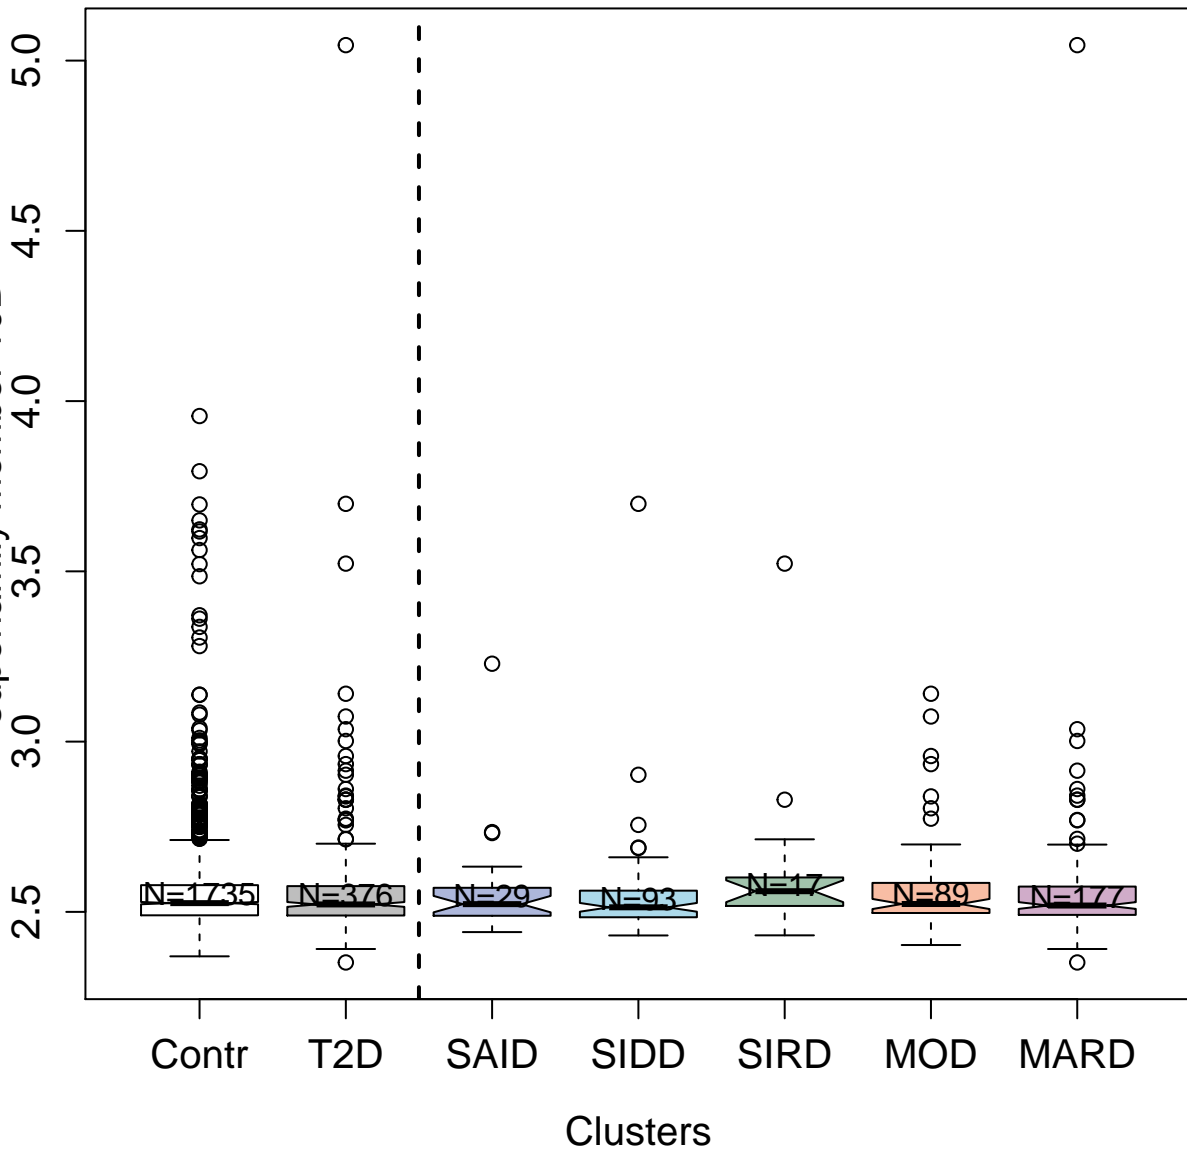

# 5384-67\_3 : Transcription factor IIIB 90 kDa subunit

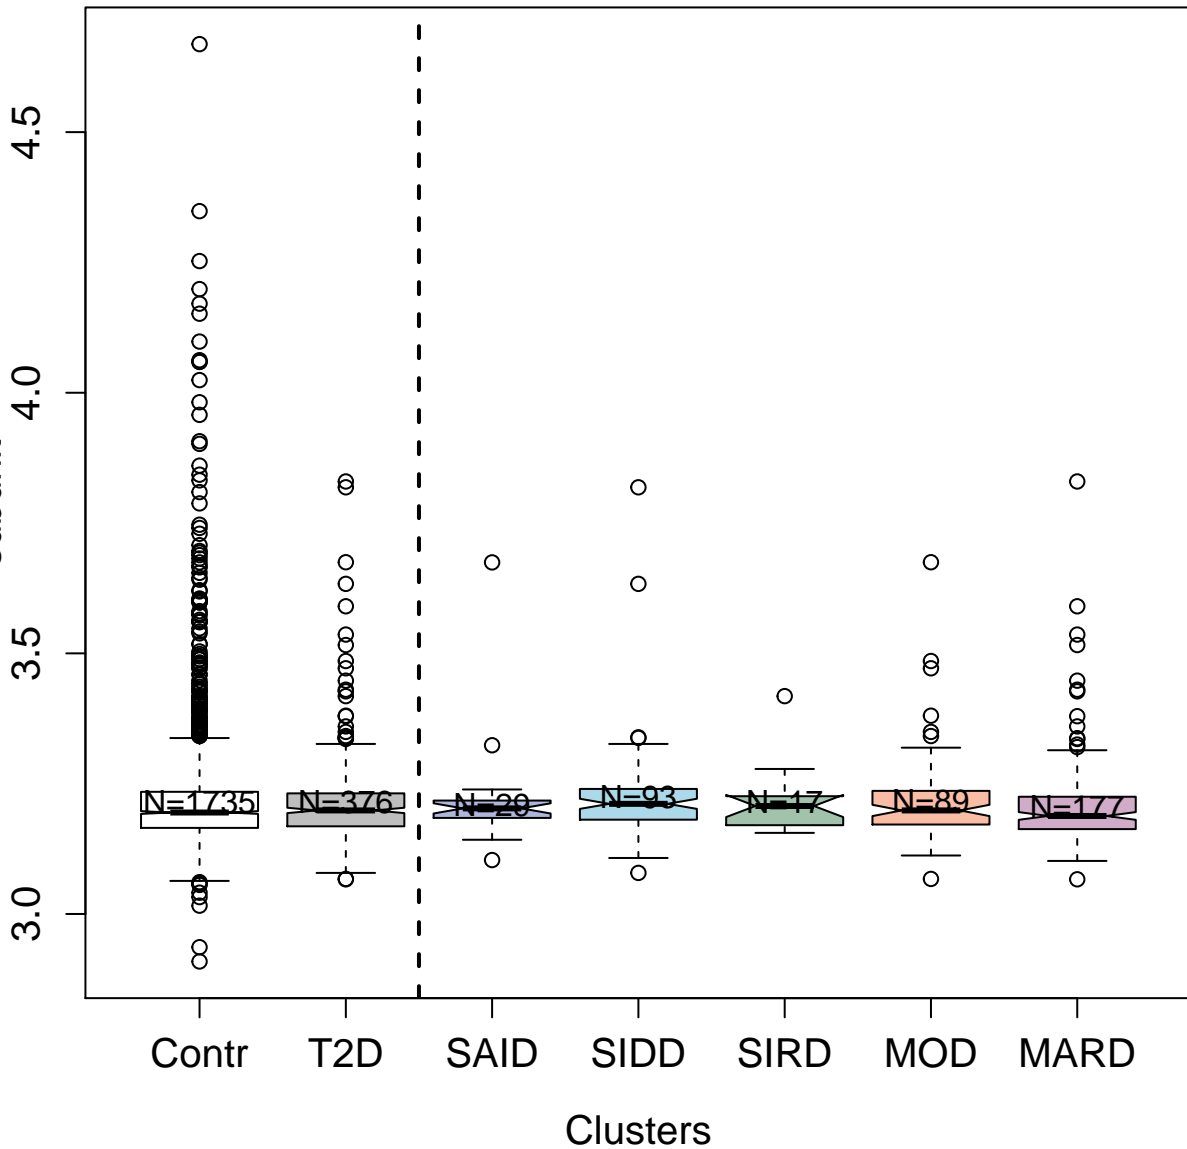

5183-53\_3 : AMP Kinase (alpha1beta1gamma1)

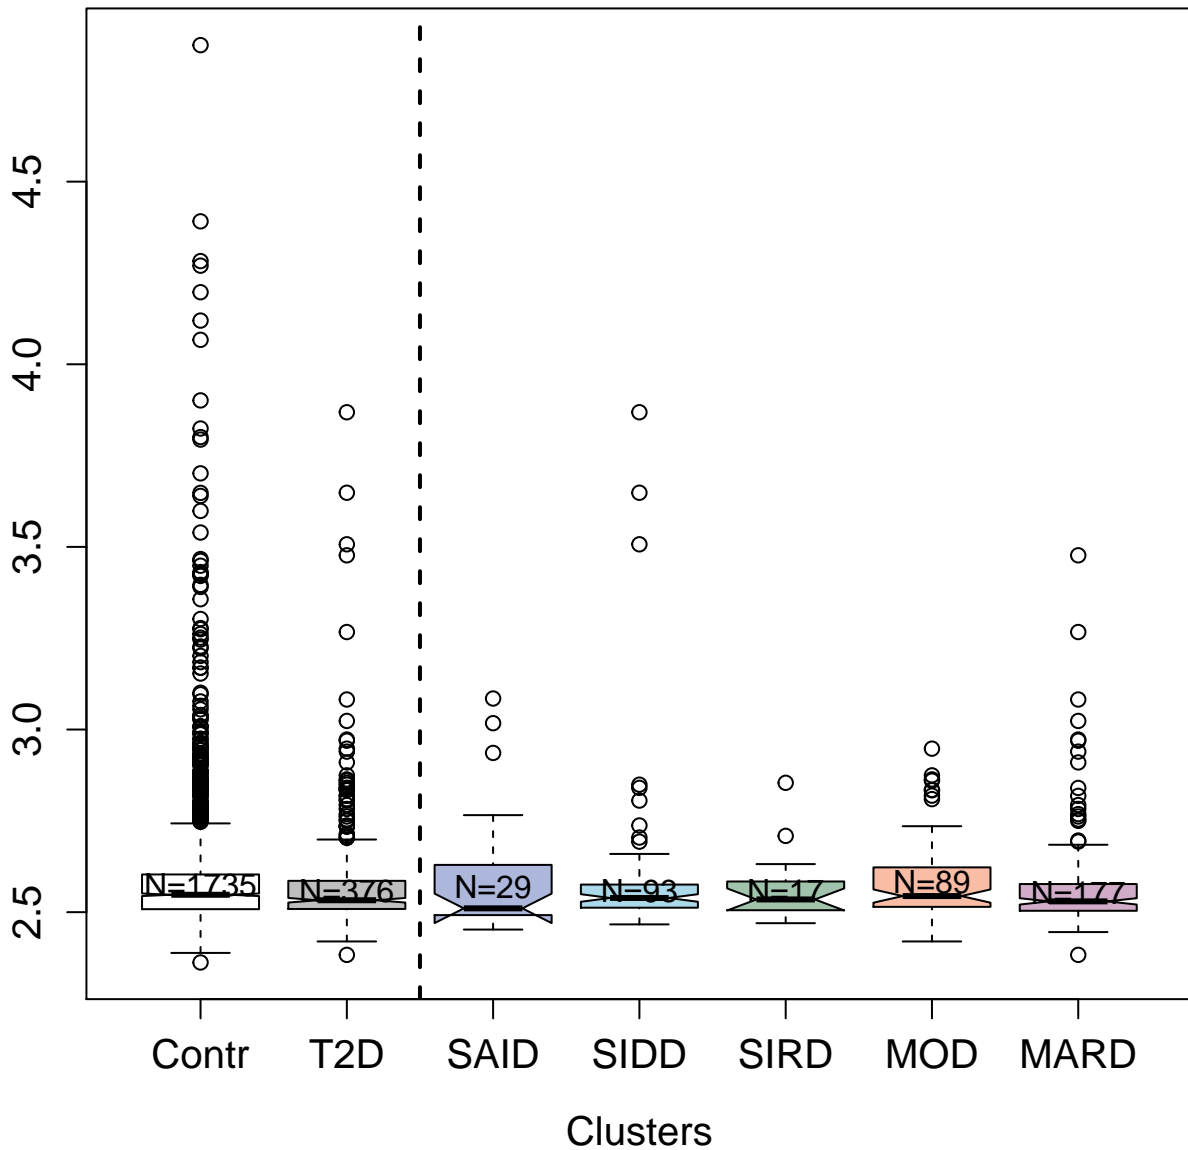



3635-76\_4 : OCIA domain-containing protein 1

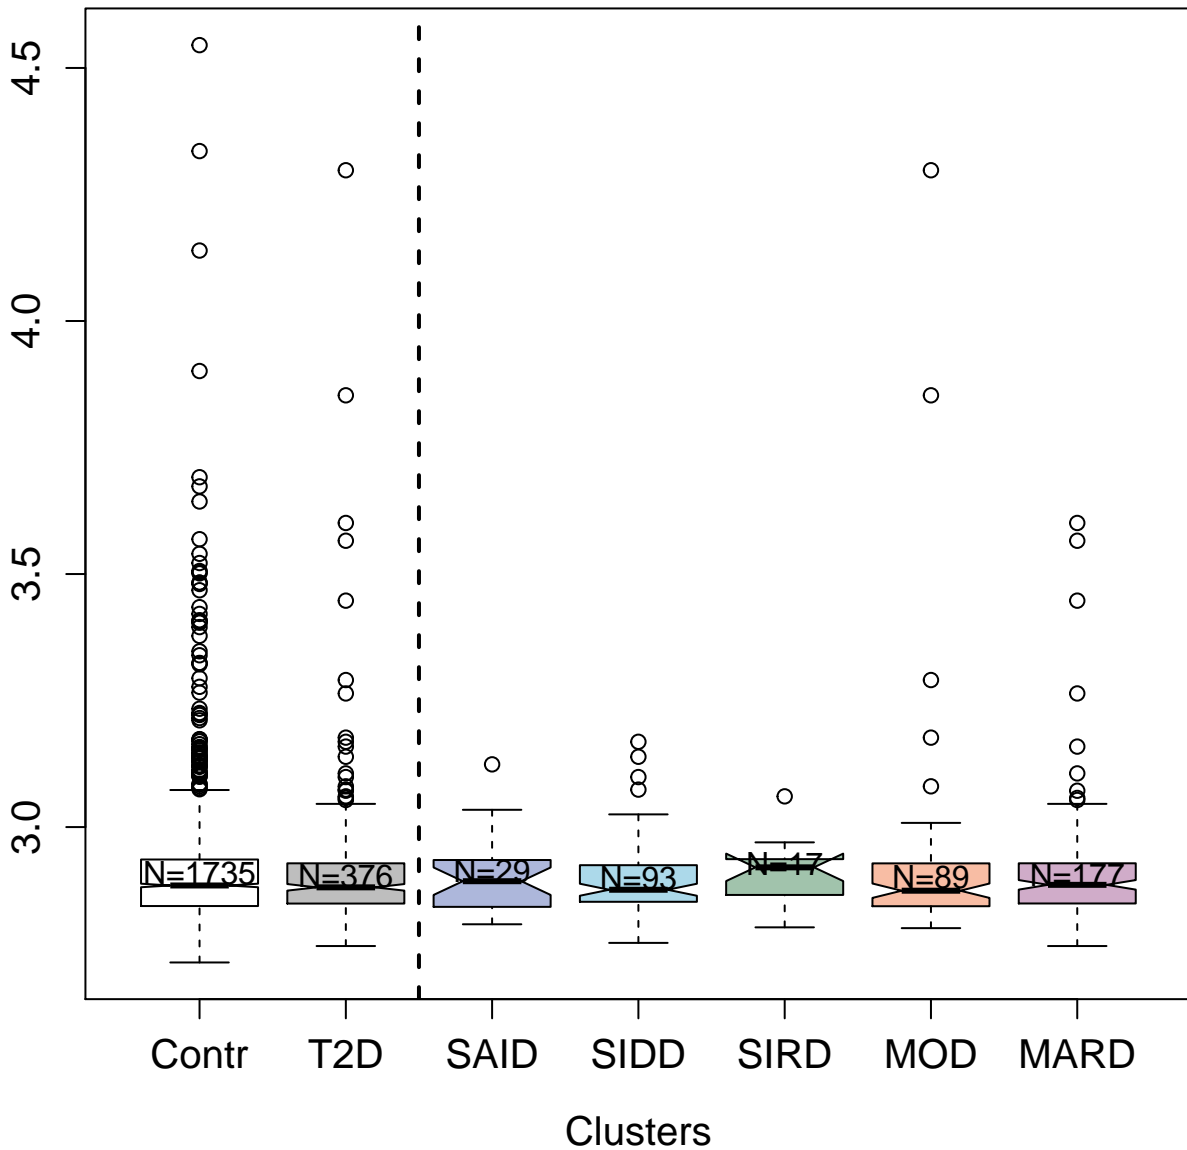

9212-22\_3 : Cathepsin F

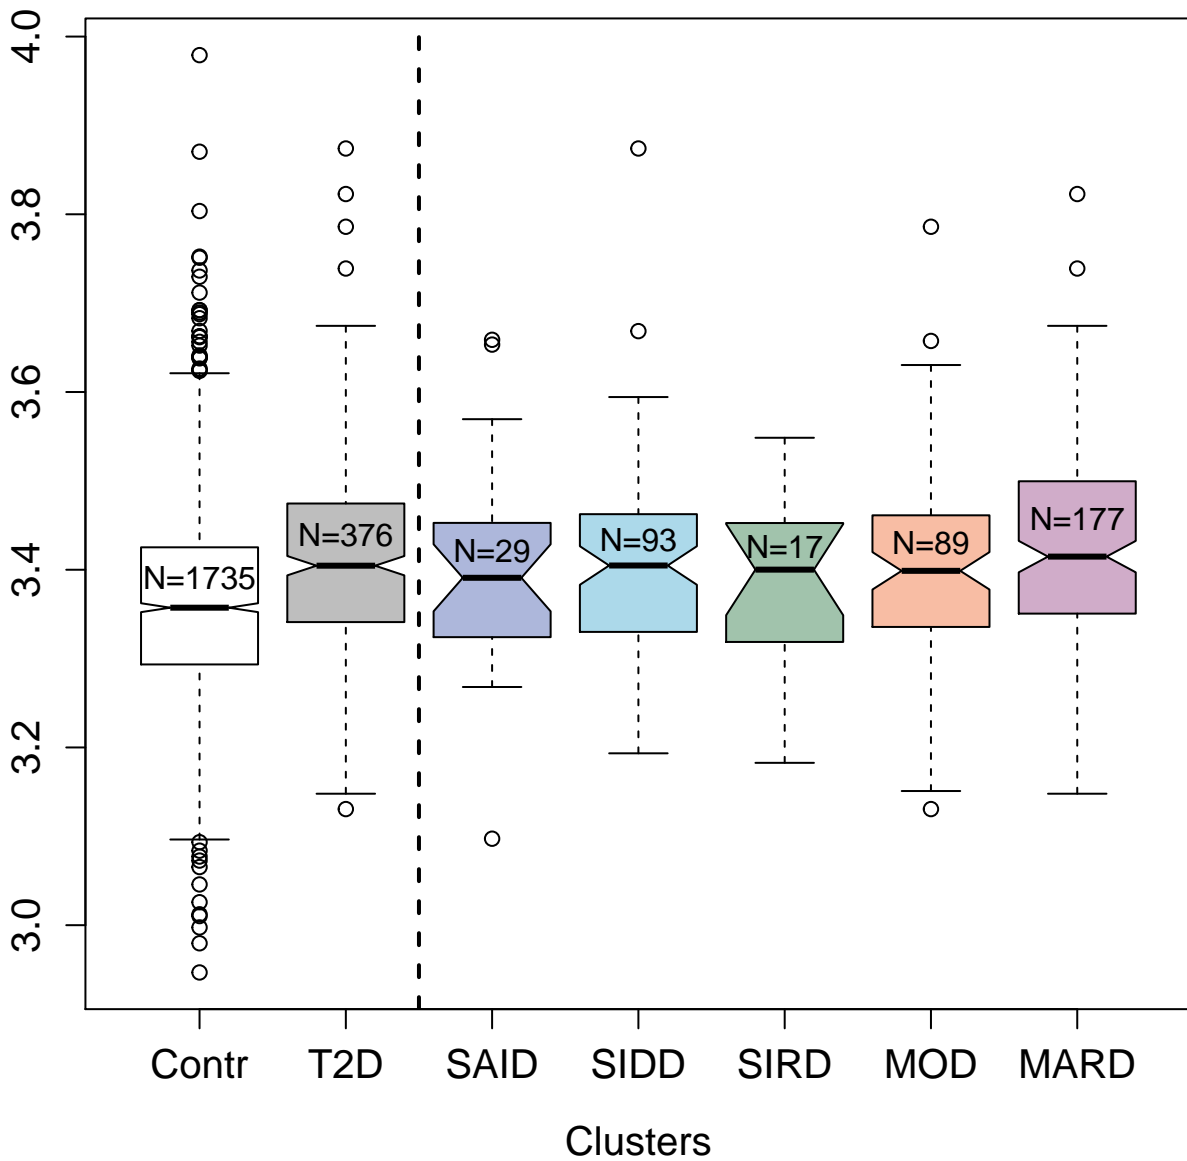

3758-68\_3 : Activated Protein C

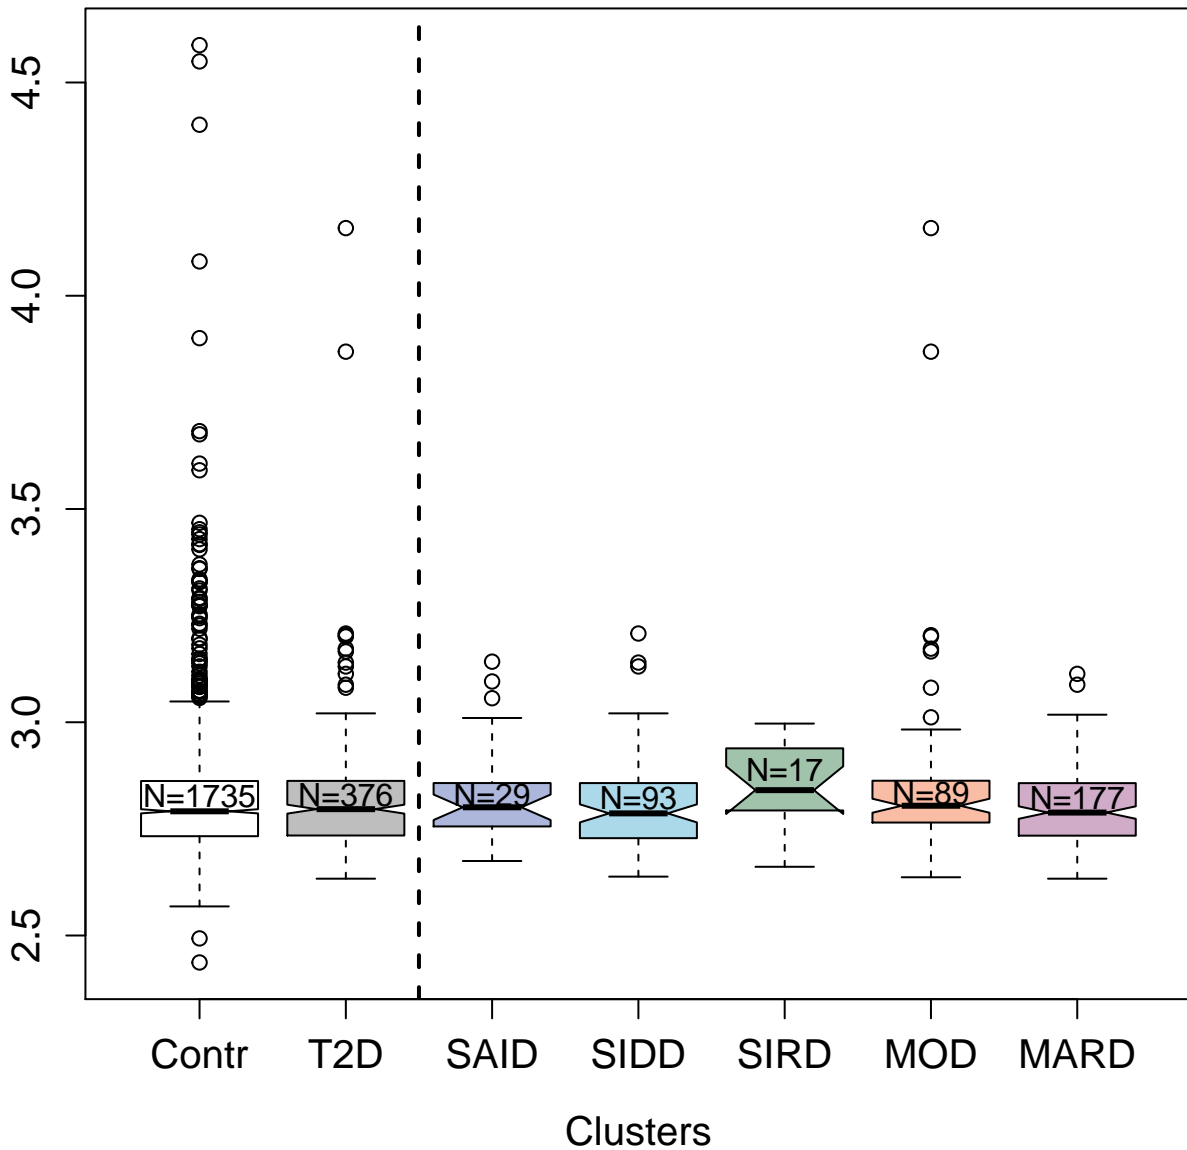

5459-33\_3 : Cystatin-SN

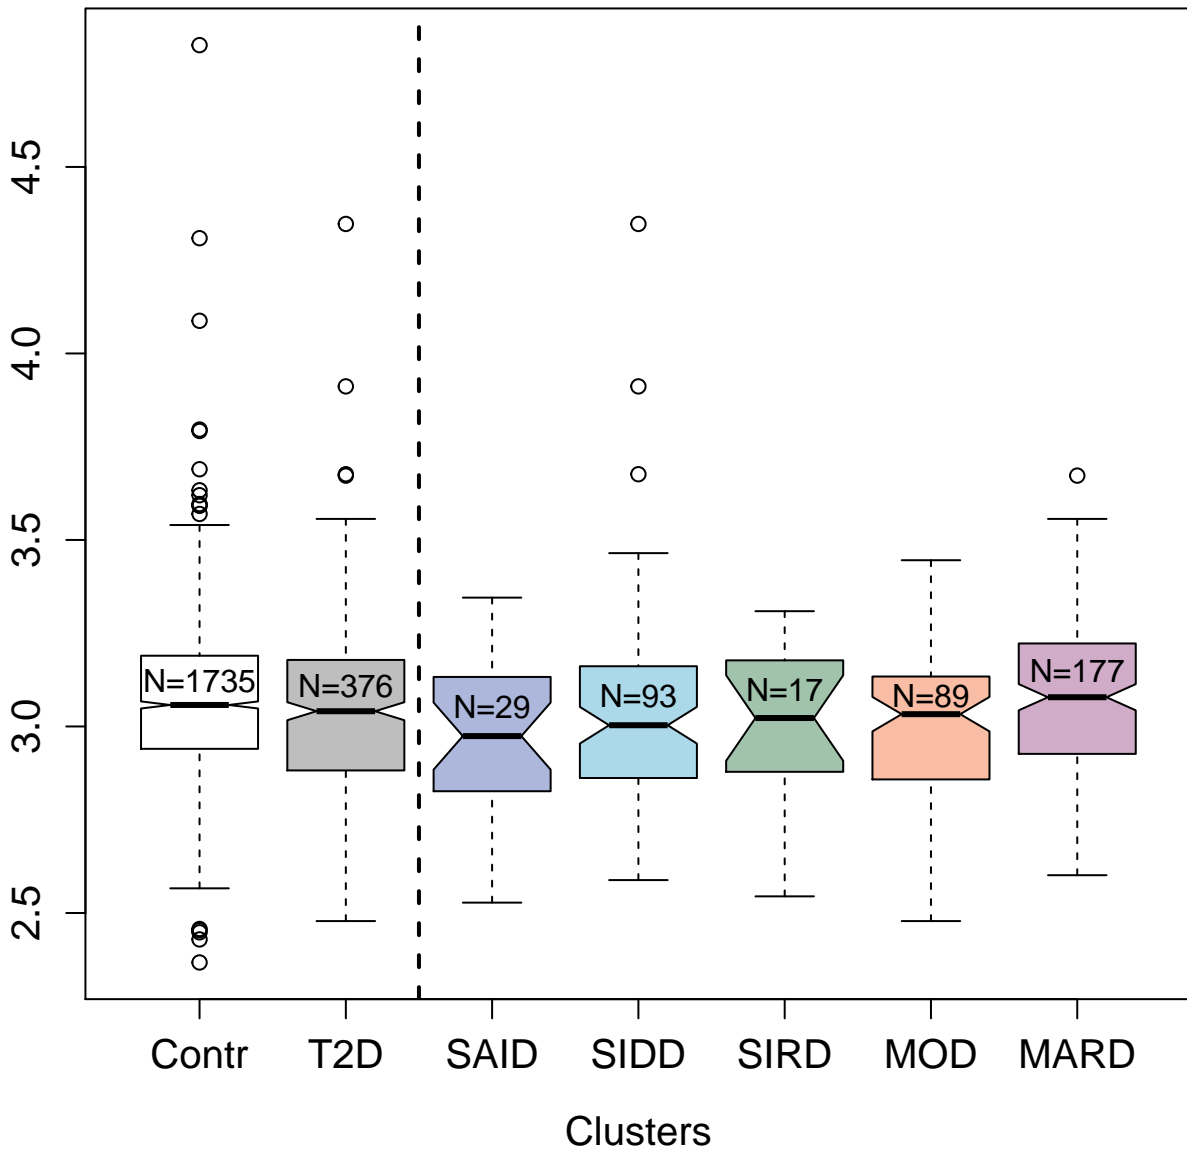

4129-72\_1 : Complement factor B

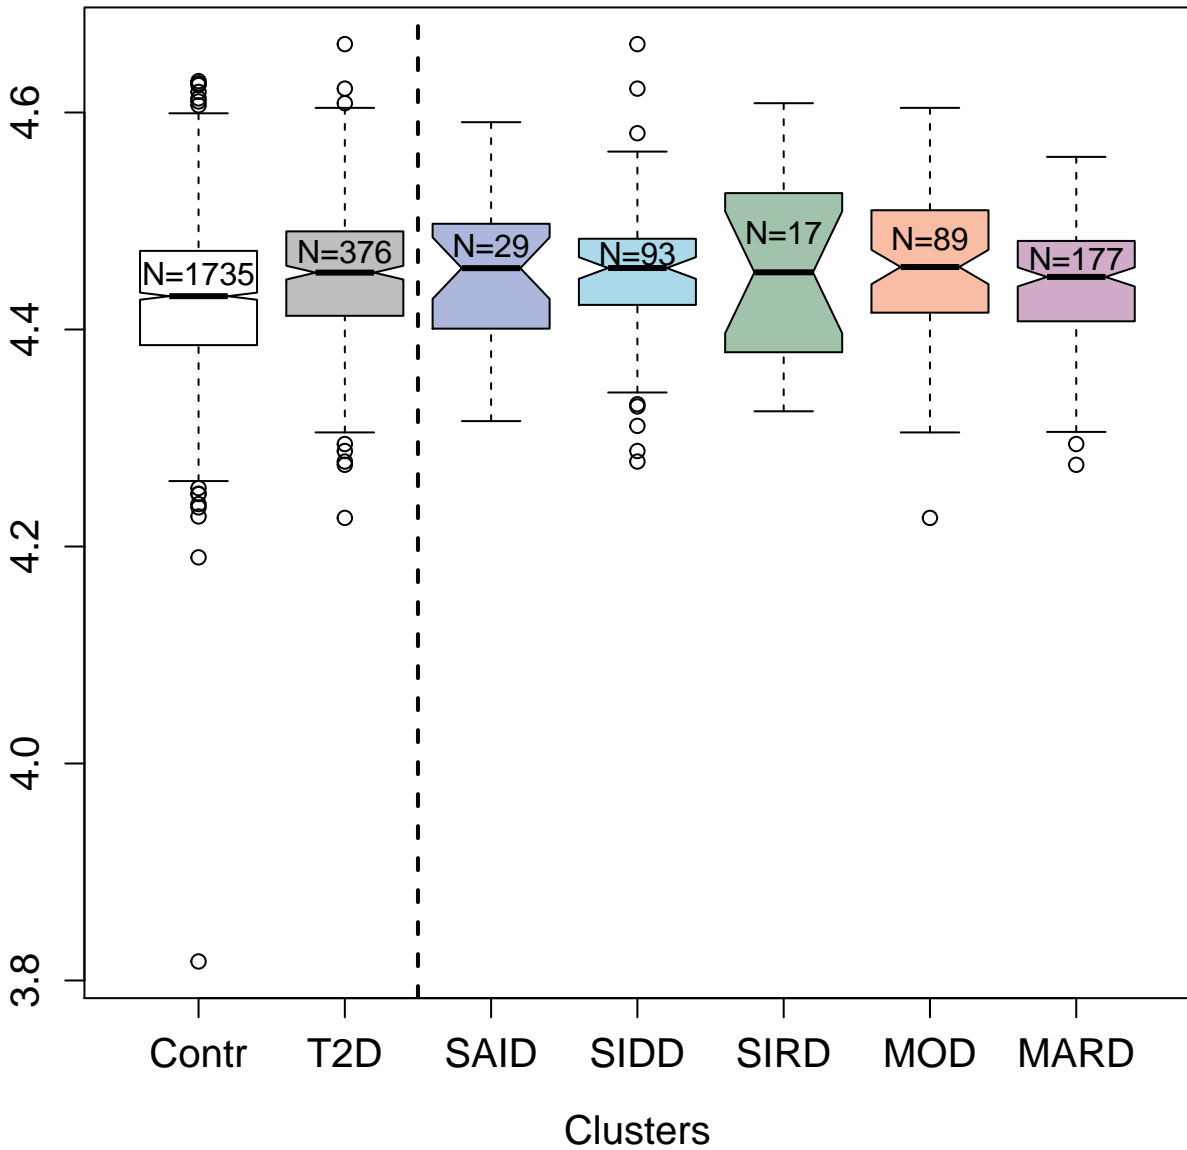

3305-6\_1 : Delta-like protein 4

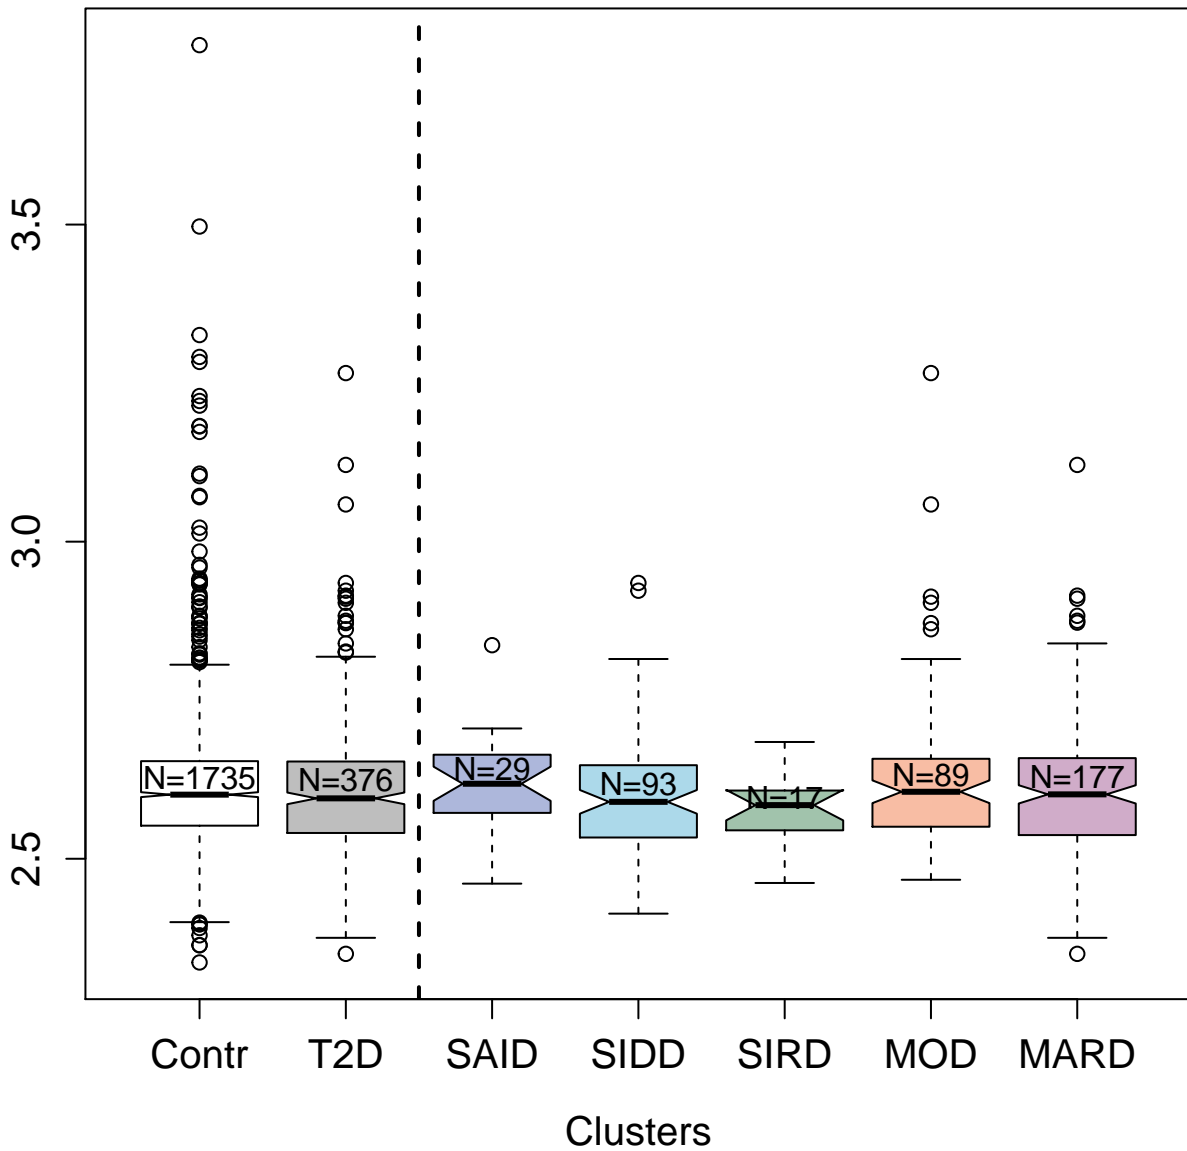

5803-24\_3 : Complement C3d fragment

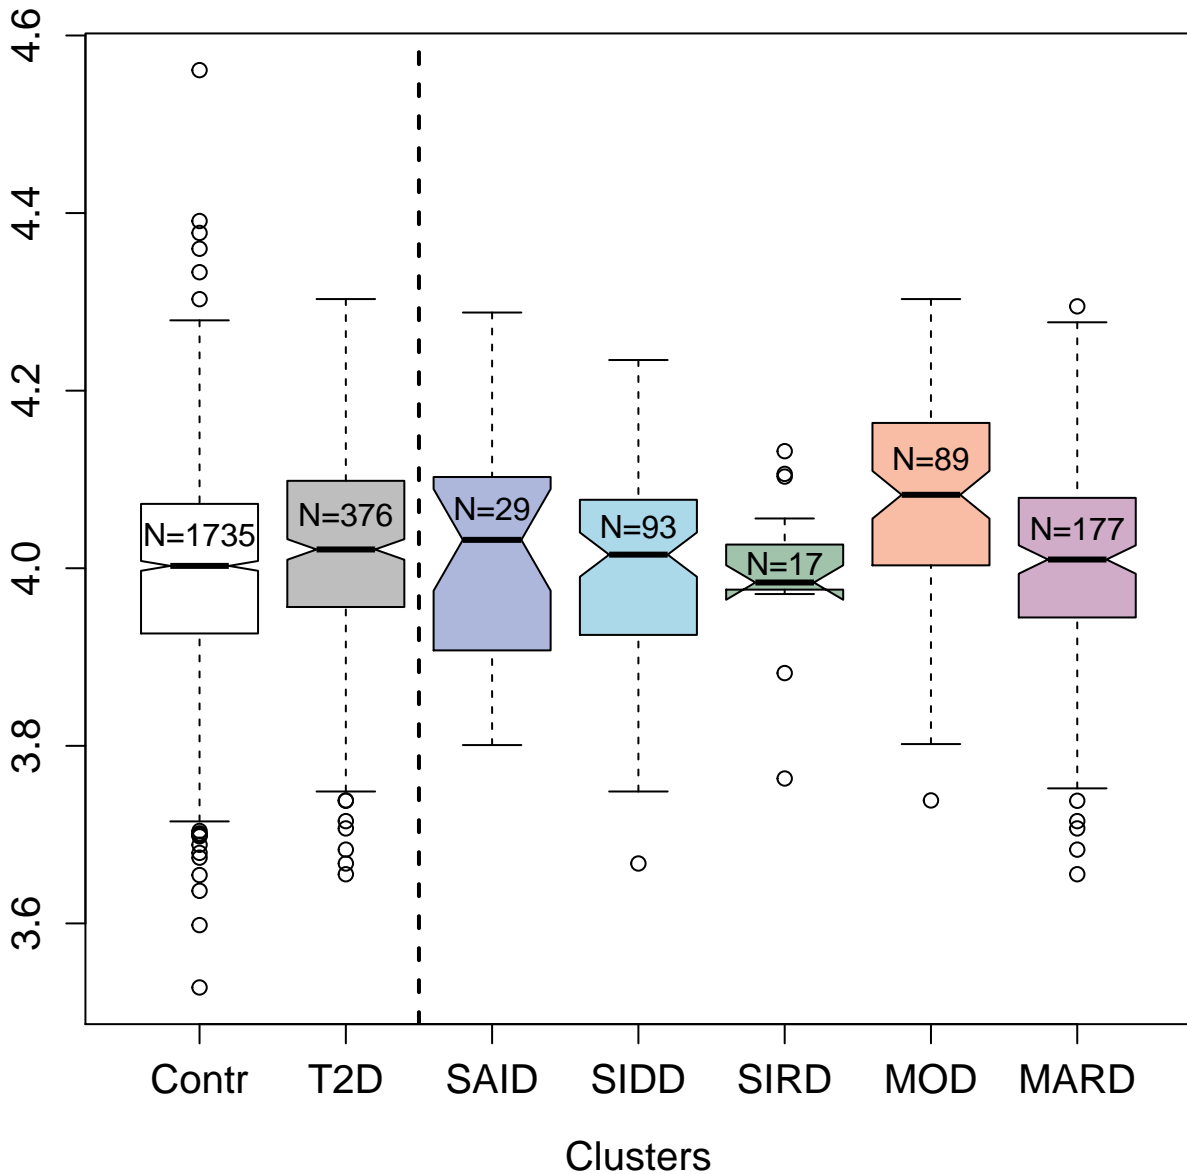





3025-50\_1 : Fibroblast growth factor 2

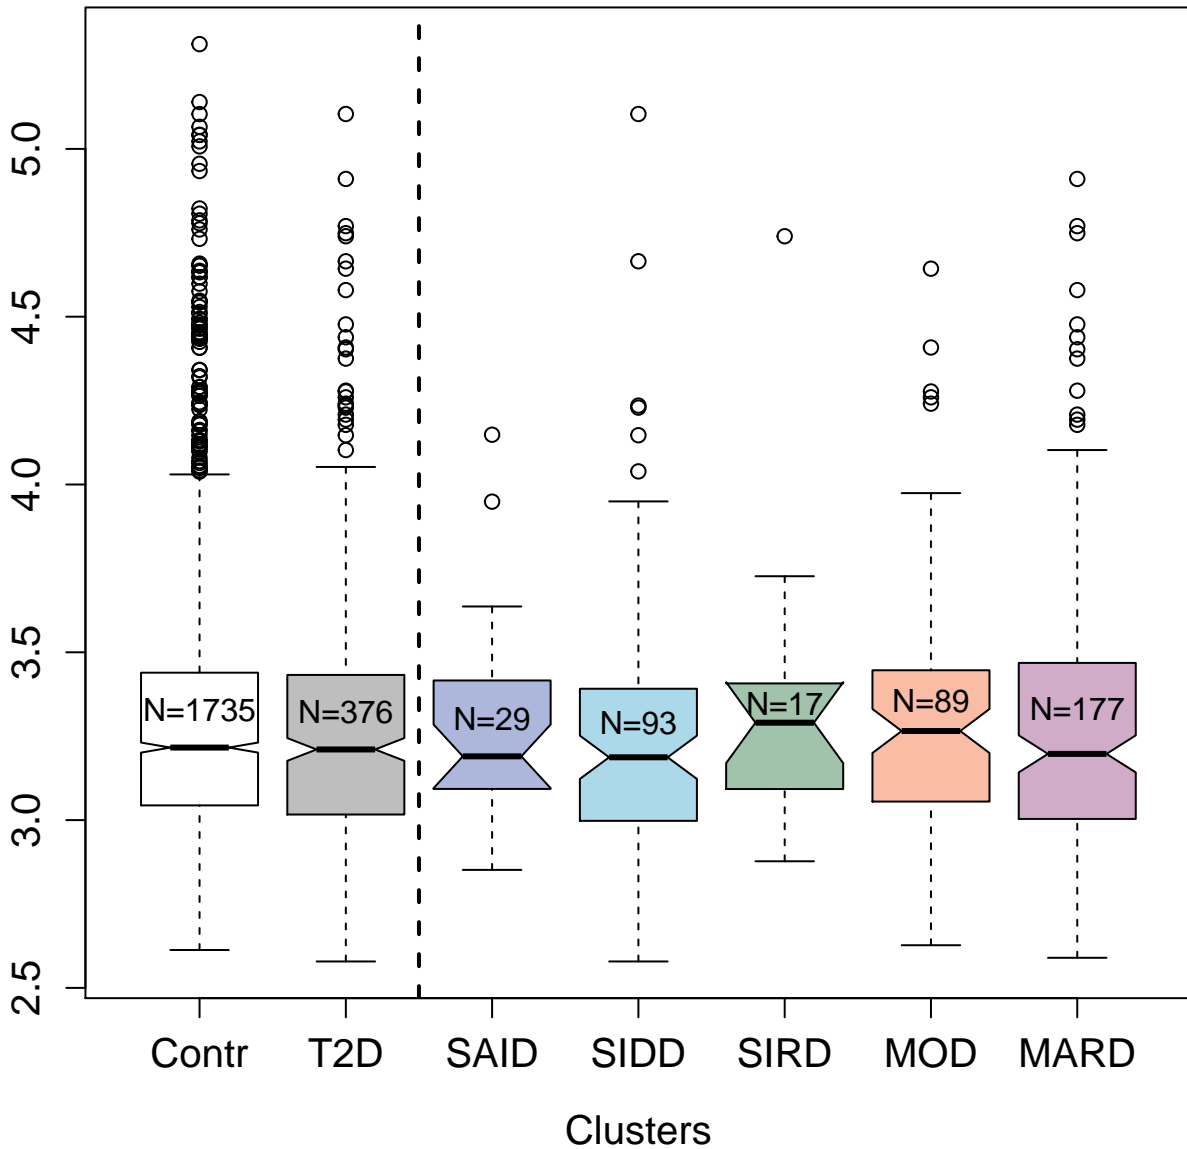

# 4238-4\_2 : Protein lin-7 homolog B

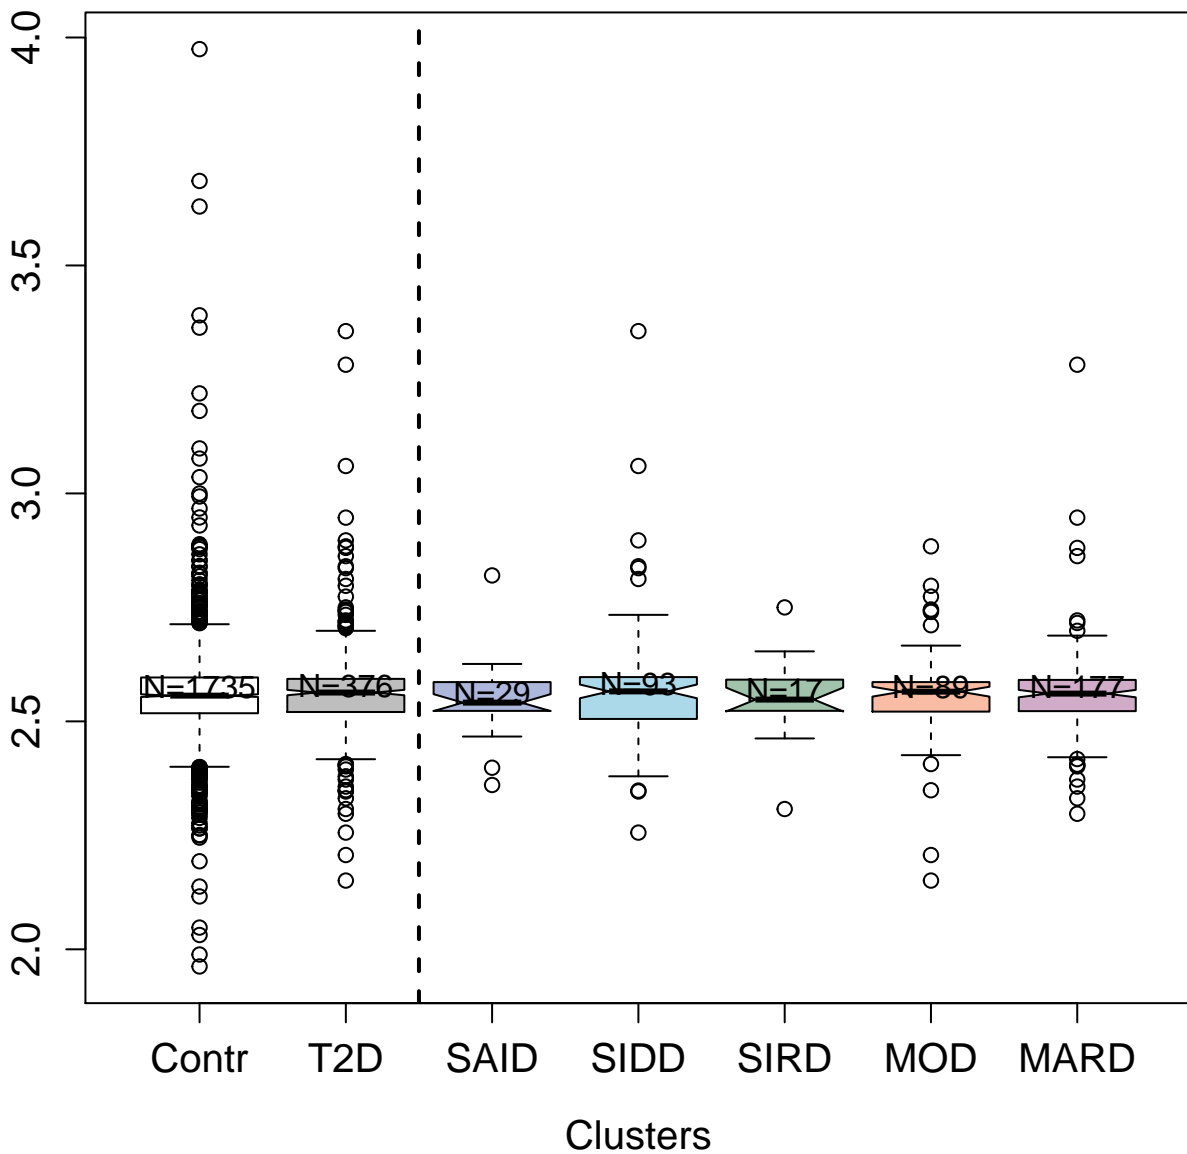

3010-53\_2 : Thymic stromal lymphopoietin

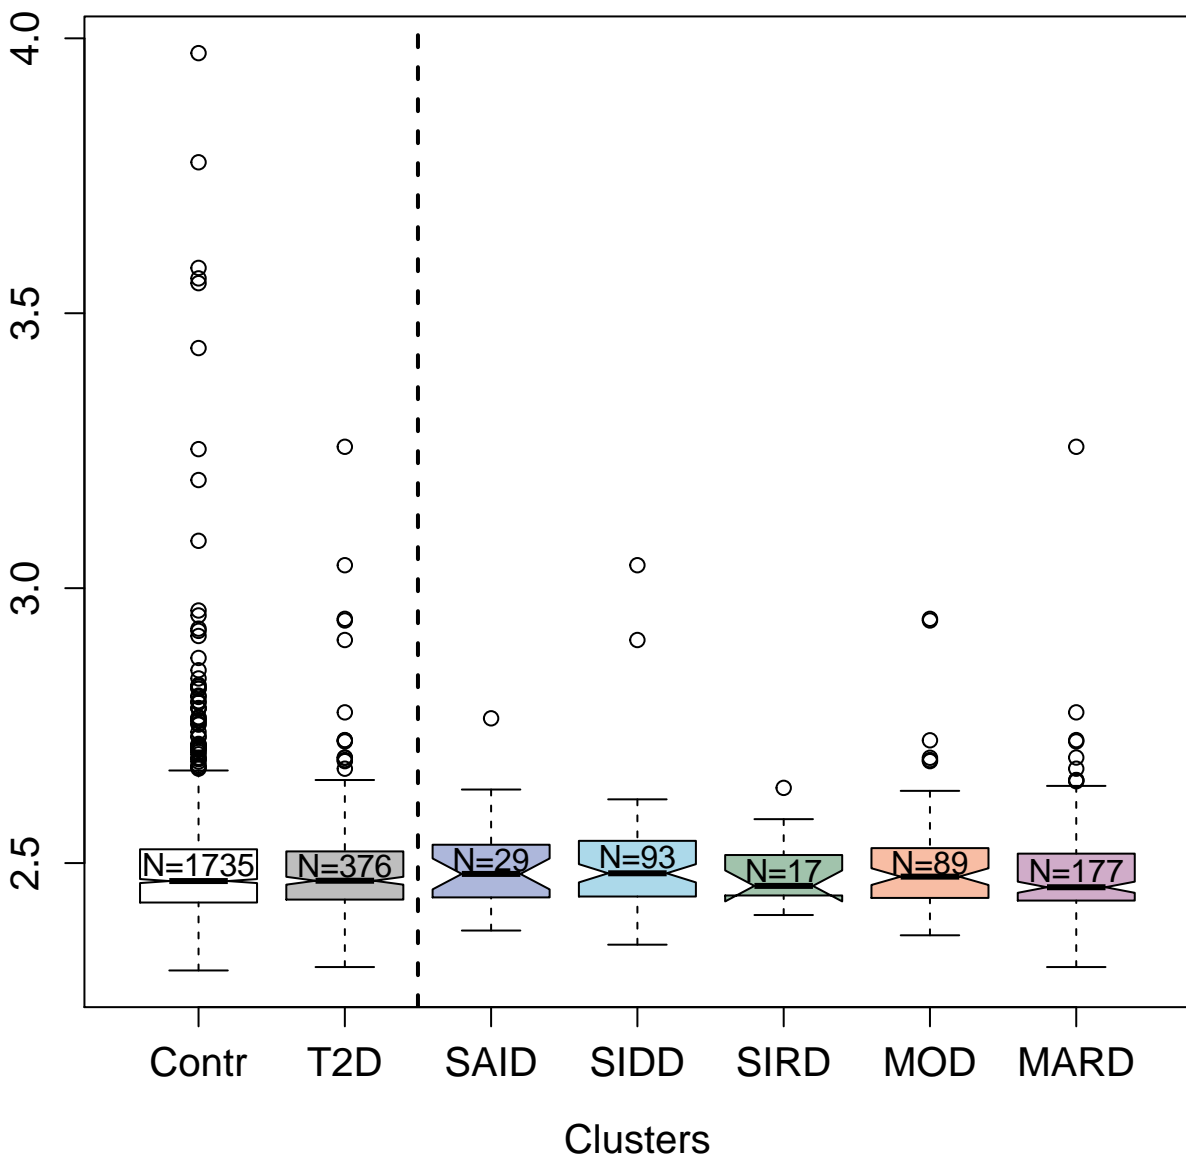

4965-27\_1 : ATP synthase subunit beta;  
mitochondrial

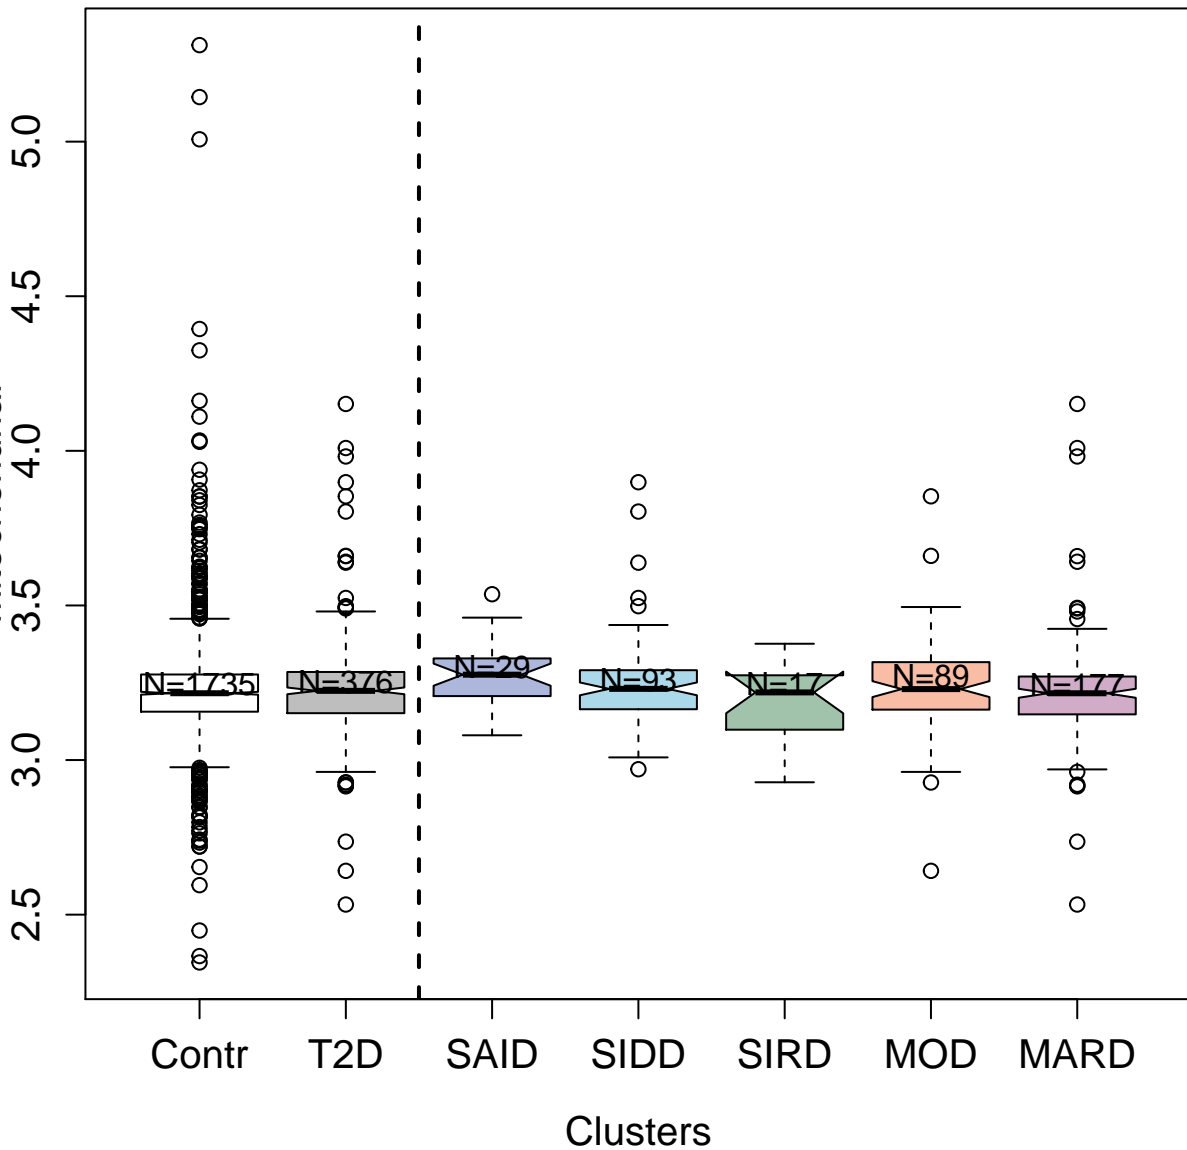

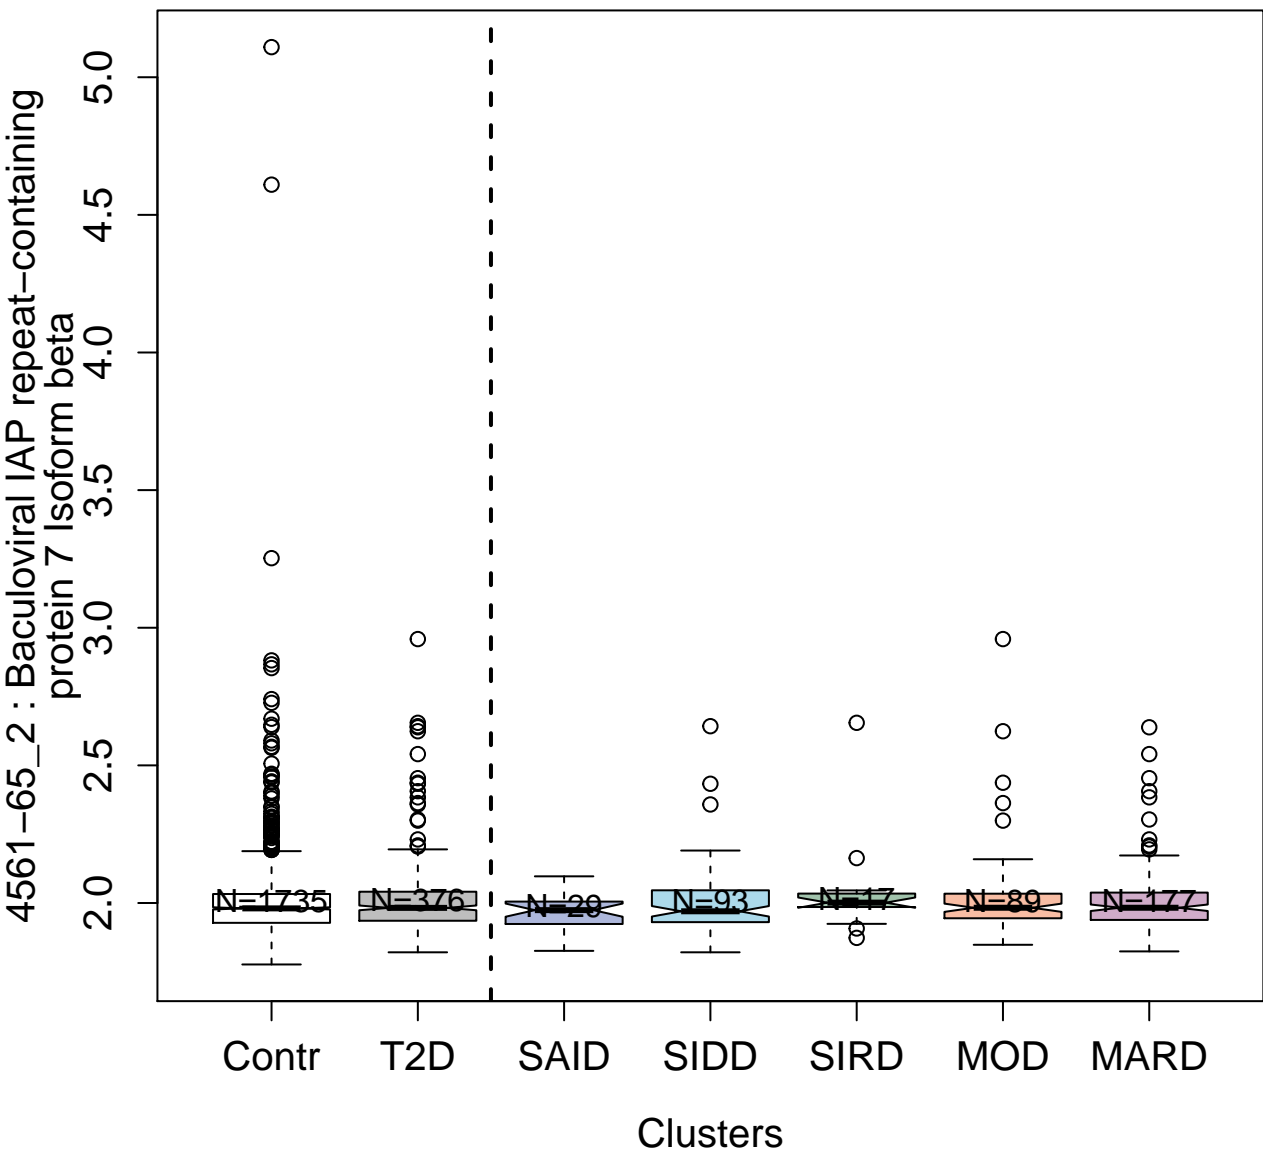

3290-50\_2 : CD109 antigen

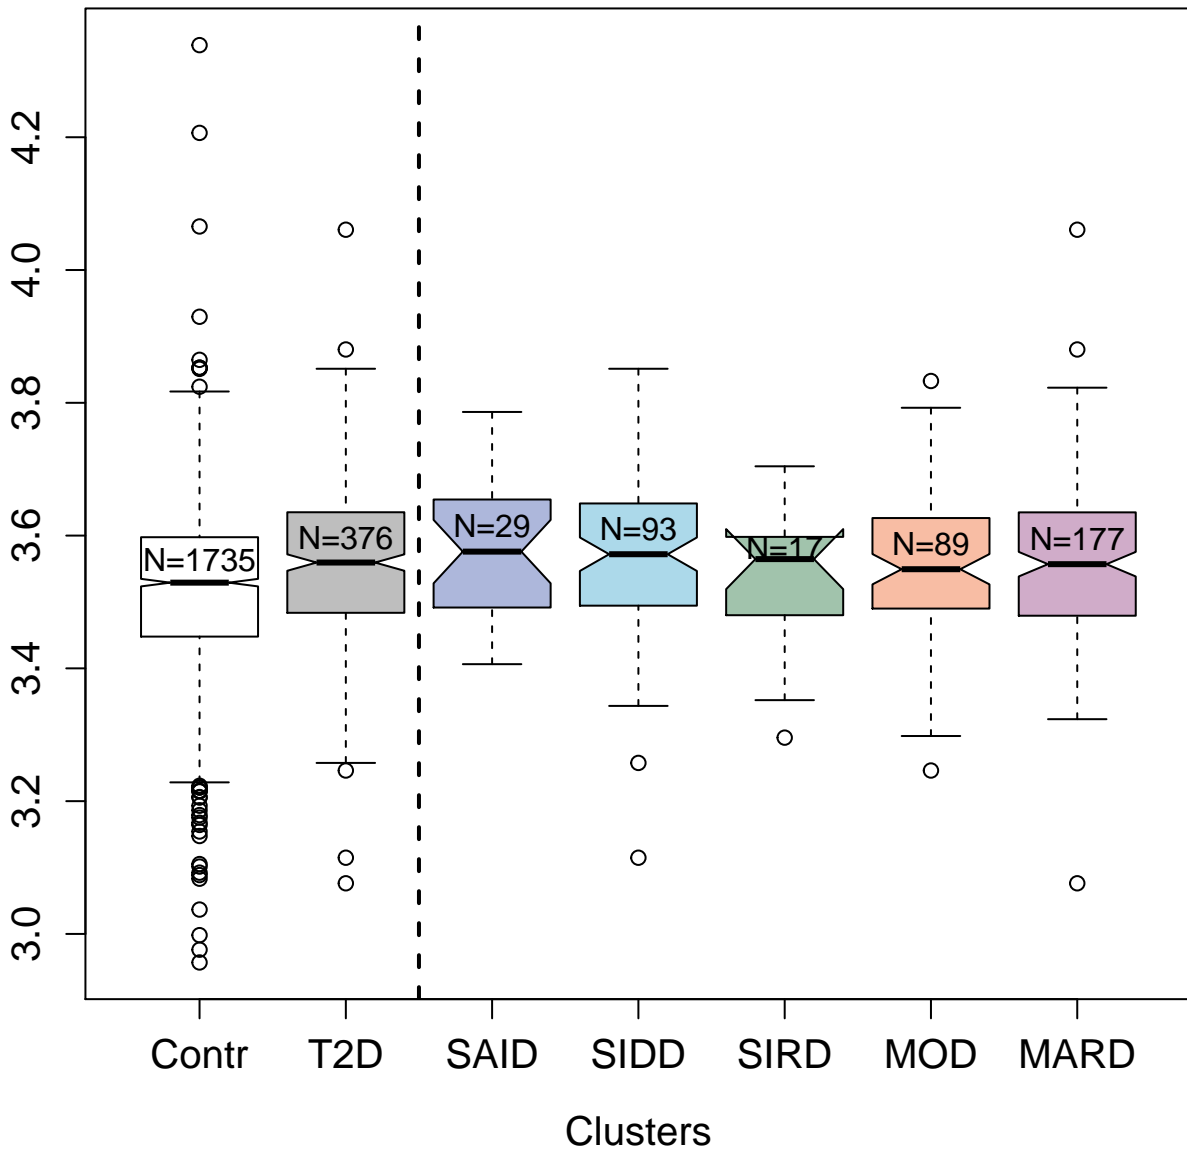

3069-52\_3 : Immunoglobulin M

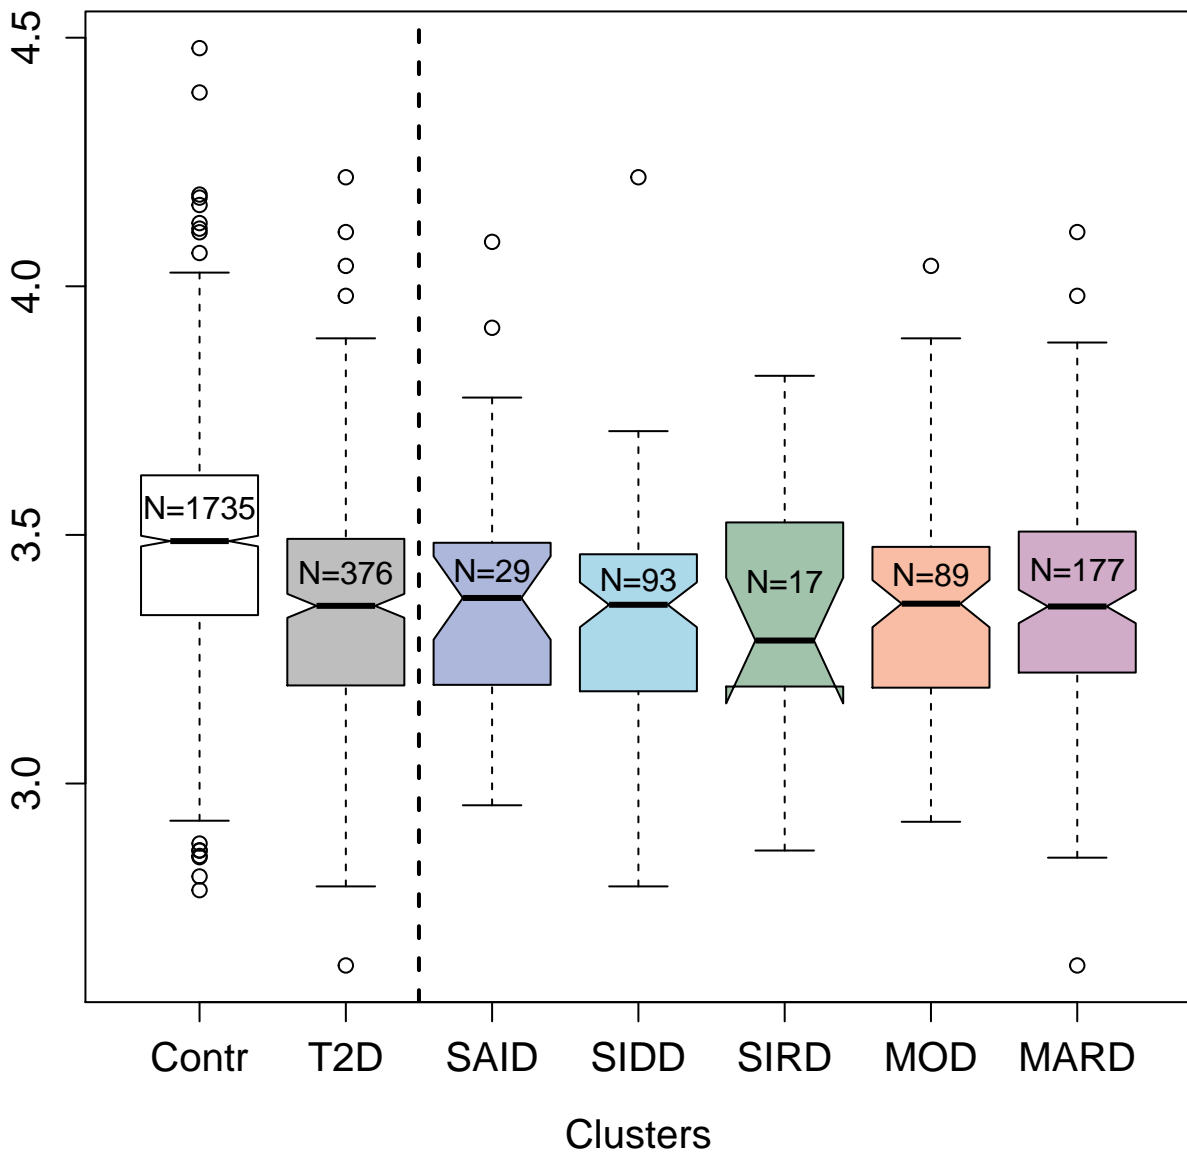

3179-51\_2 : Lysosomal protective protein

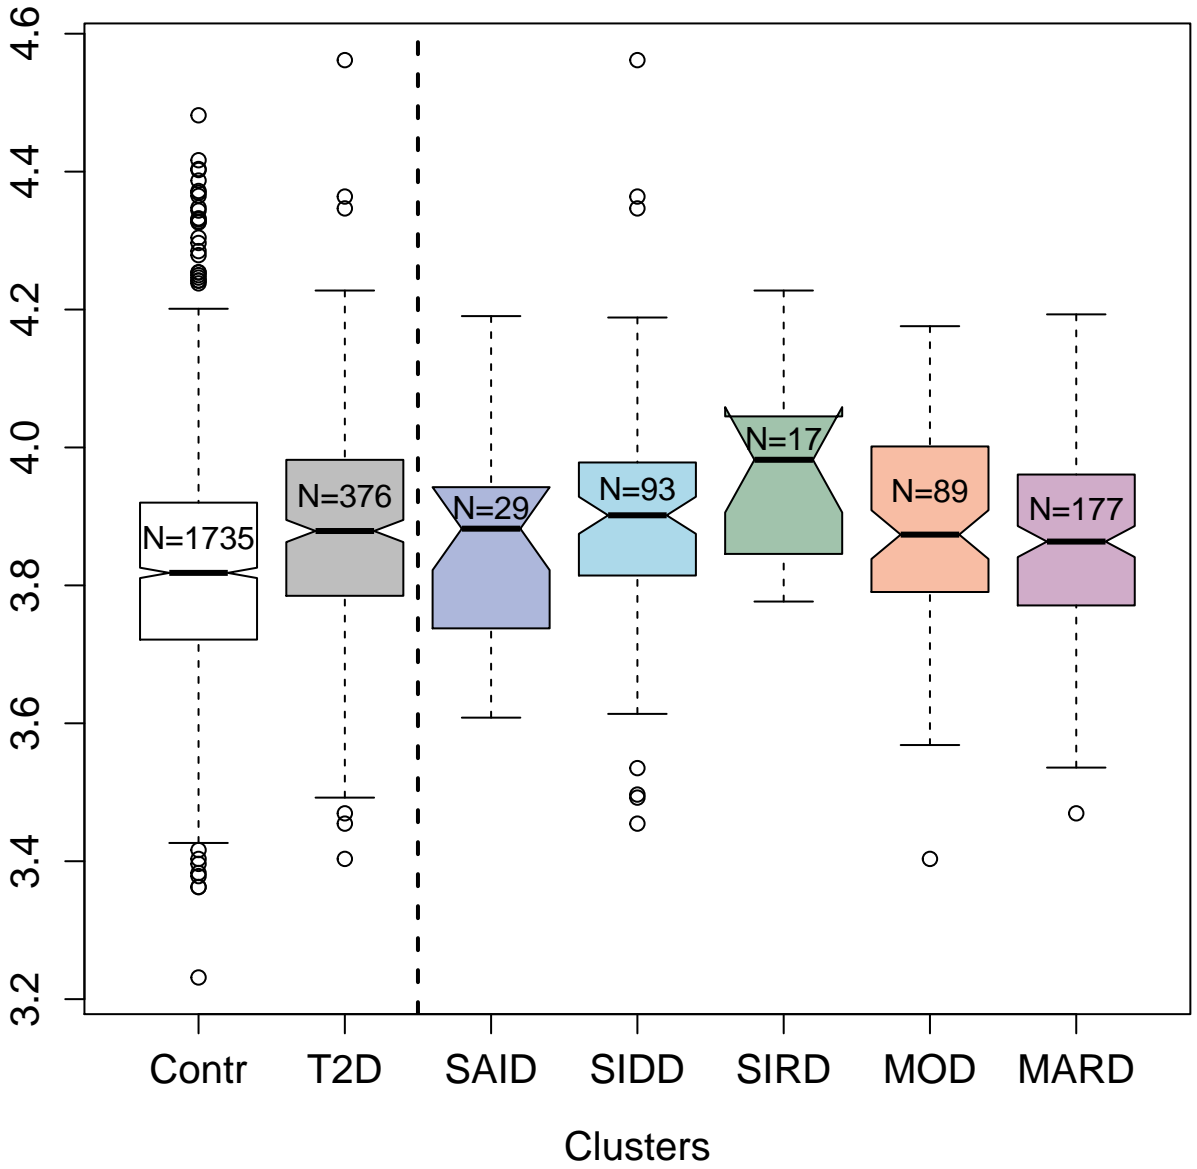



4792-51\_2 : gp41 C34 peptide; HIV

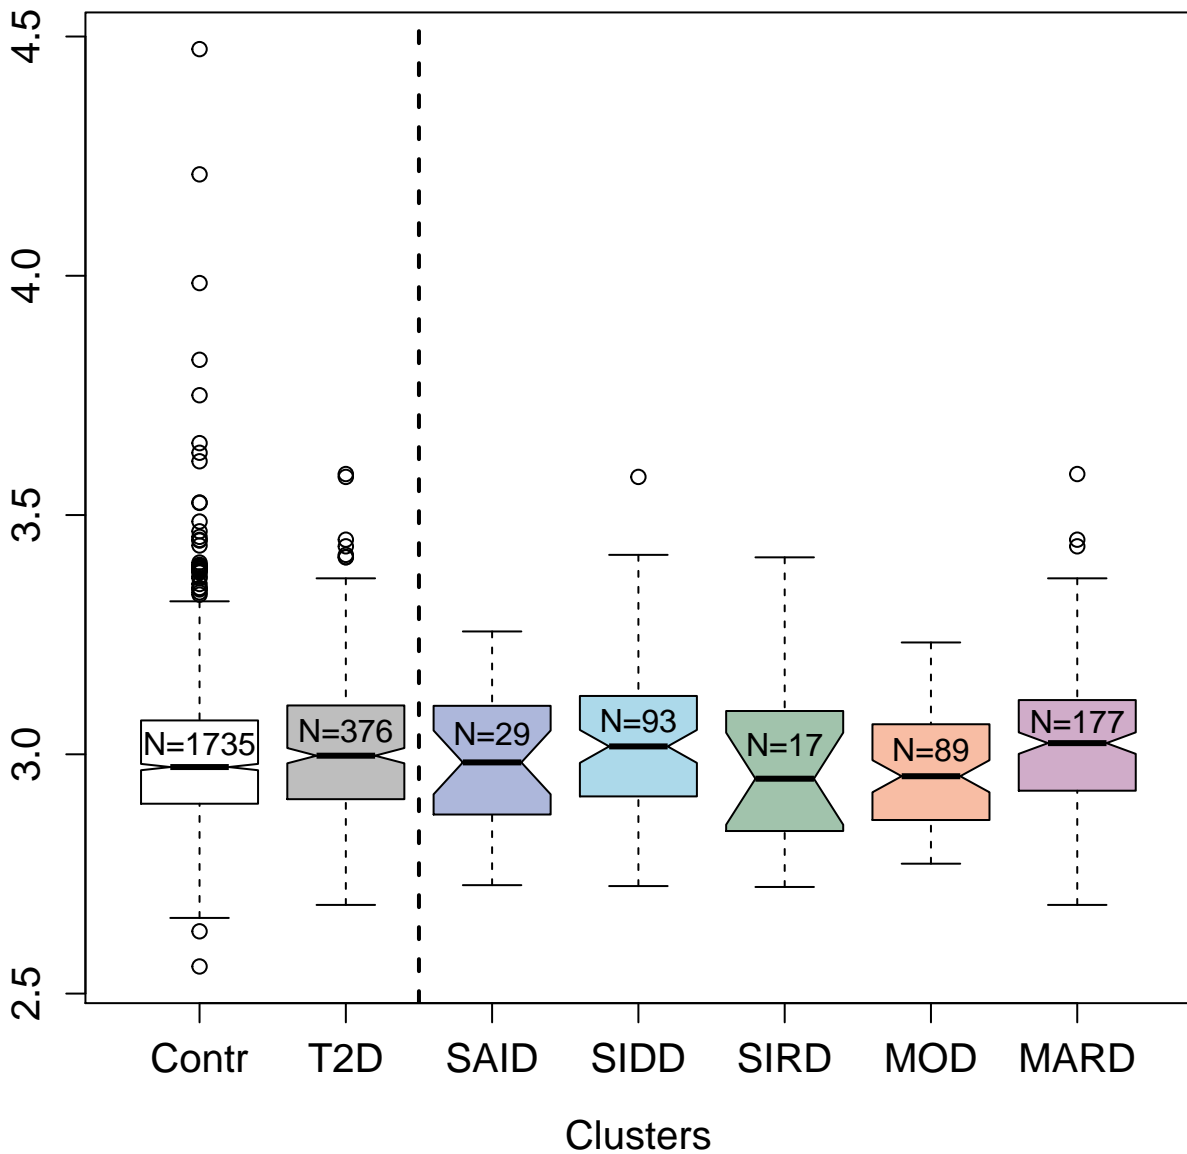

4992-49\_1 : Granulins

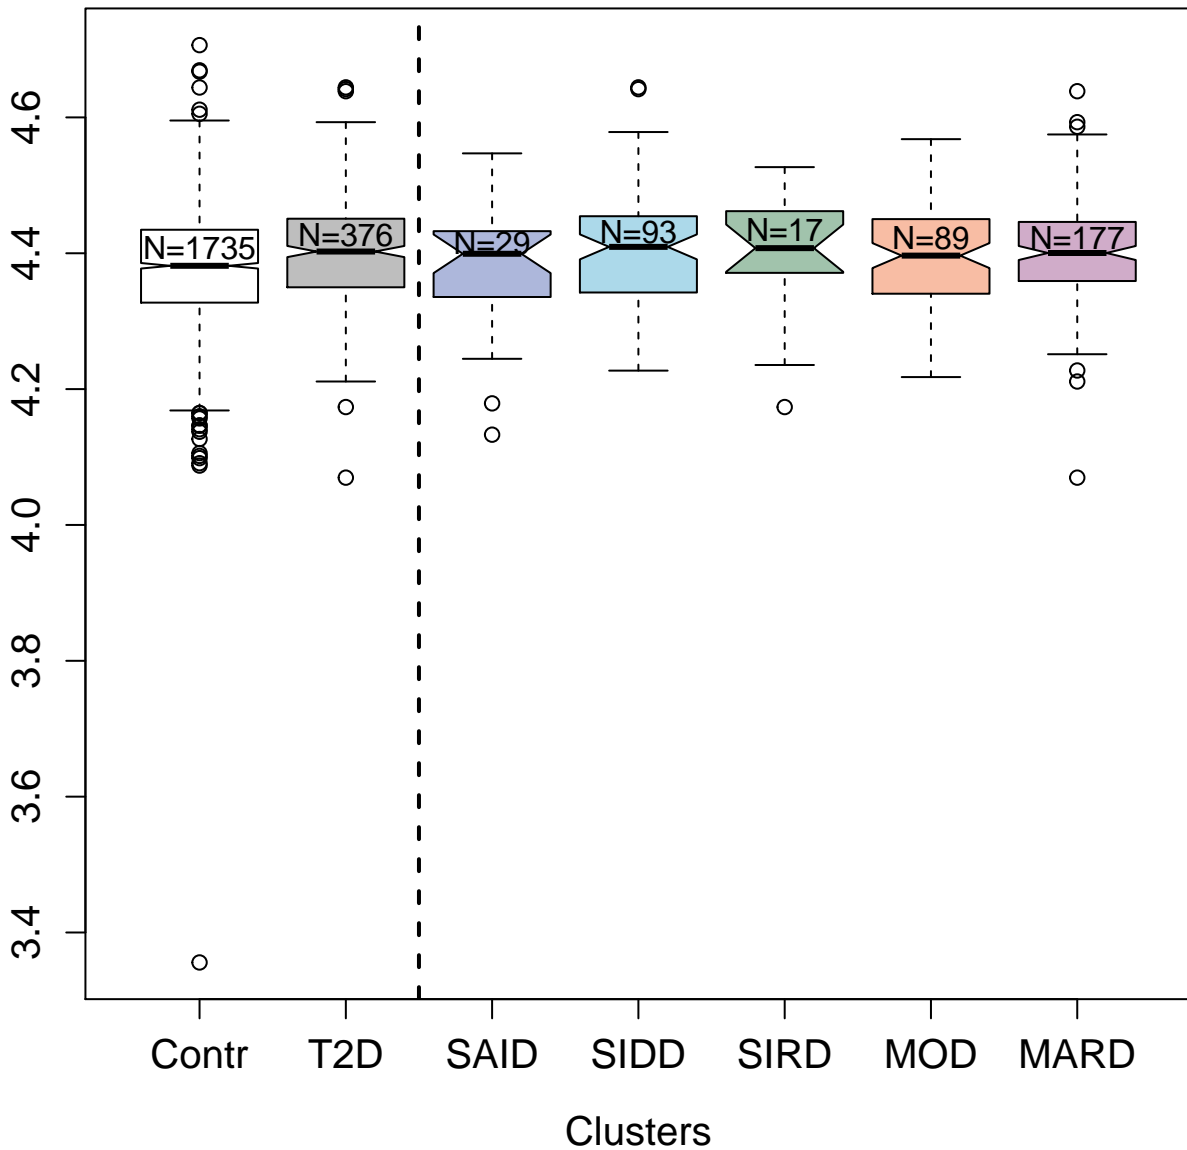

2746-56\_1 : Cytokine receptor-like factor 2

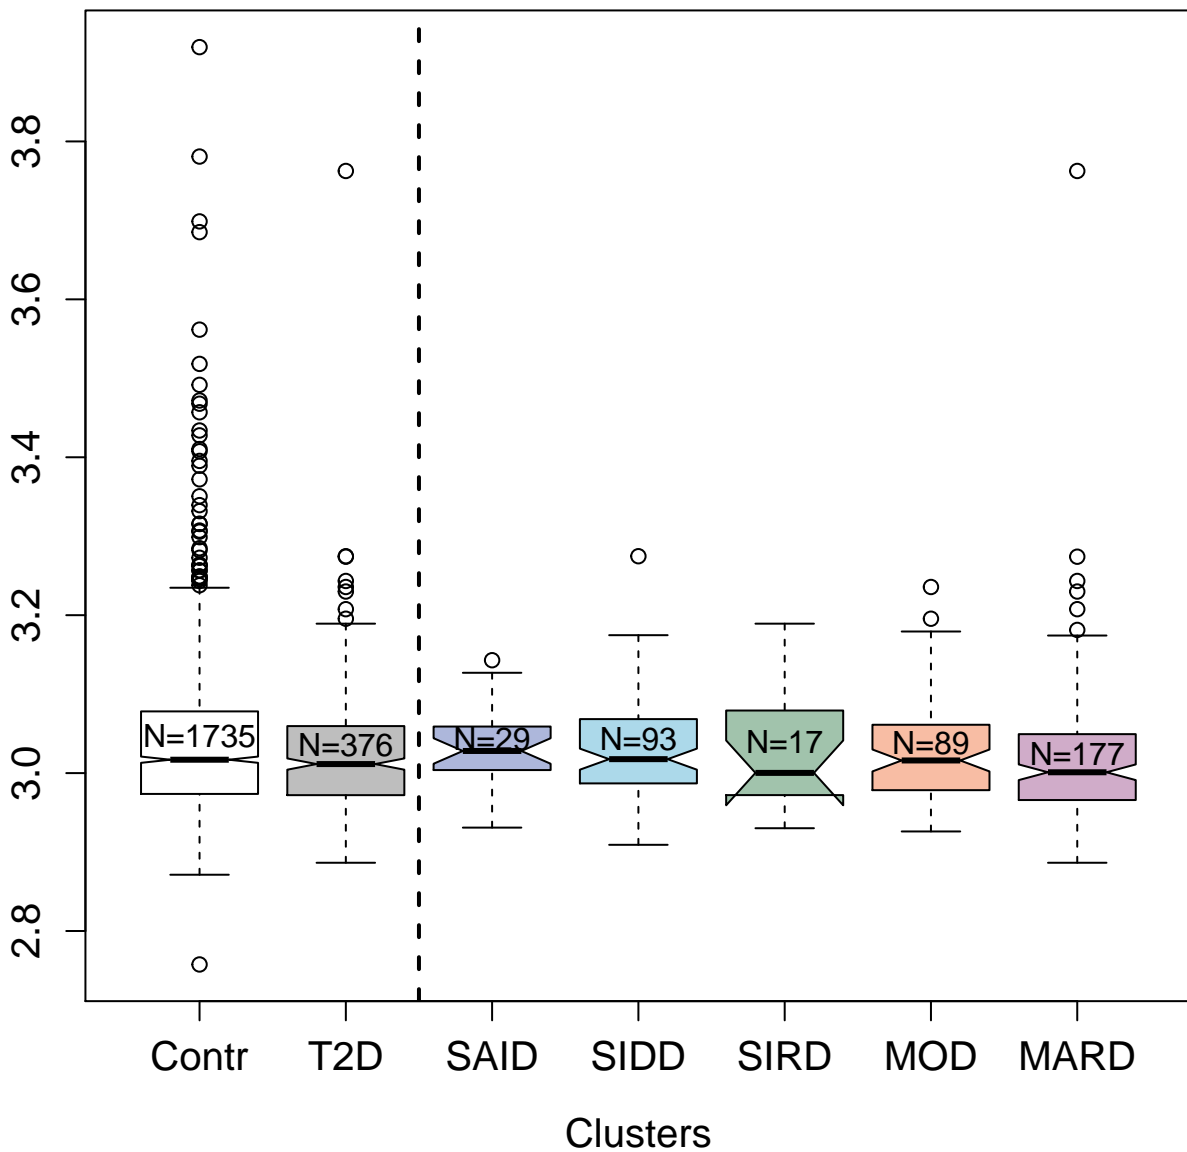

4915-64\_2 : Hemoglobin

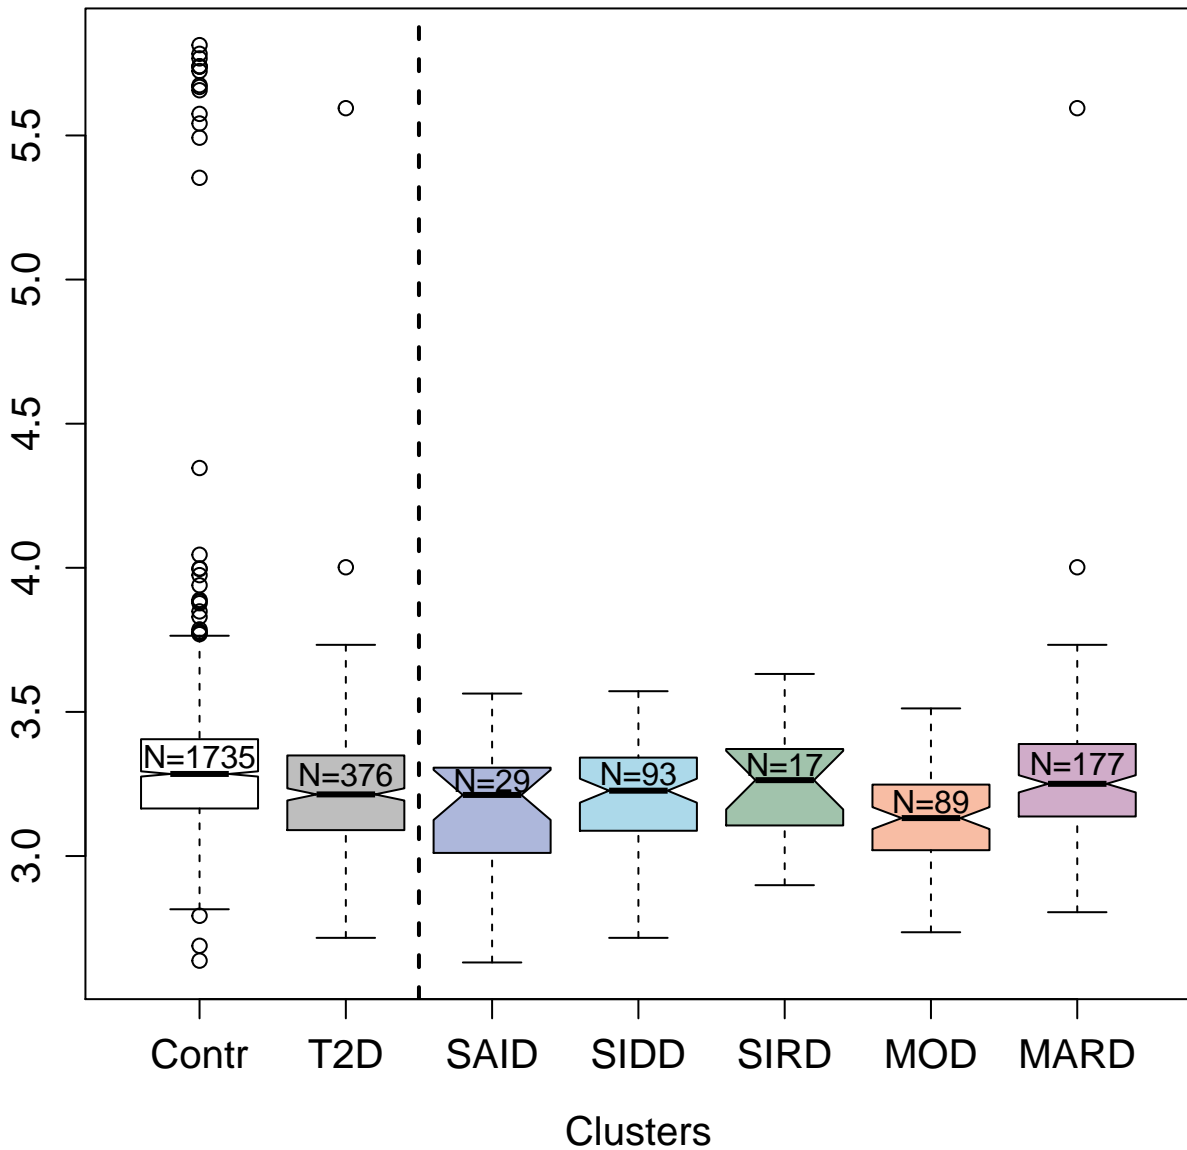

2942-50\_2 : Cytochrome c

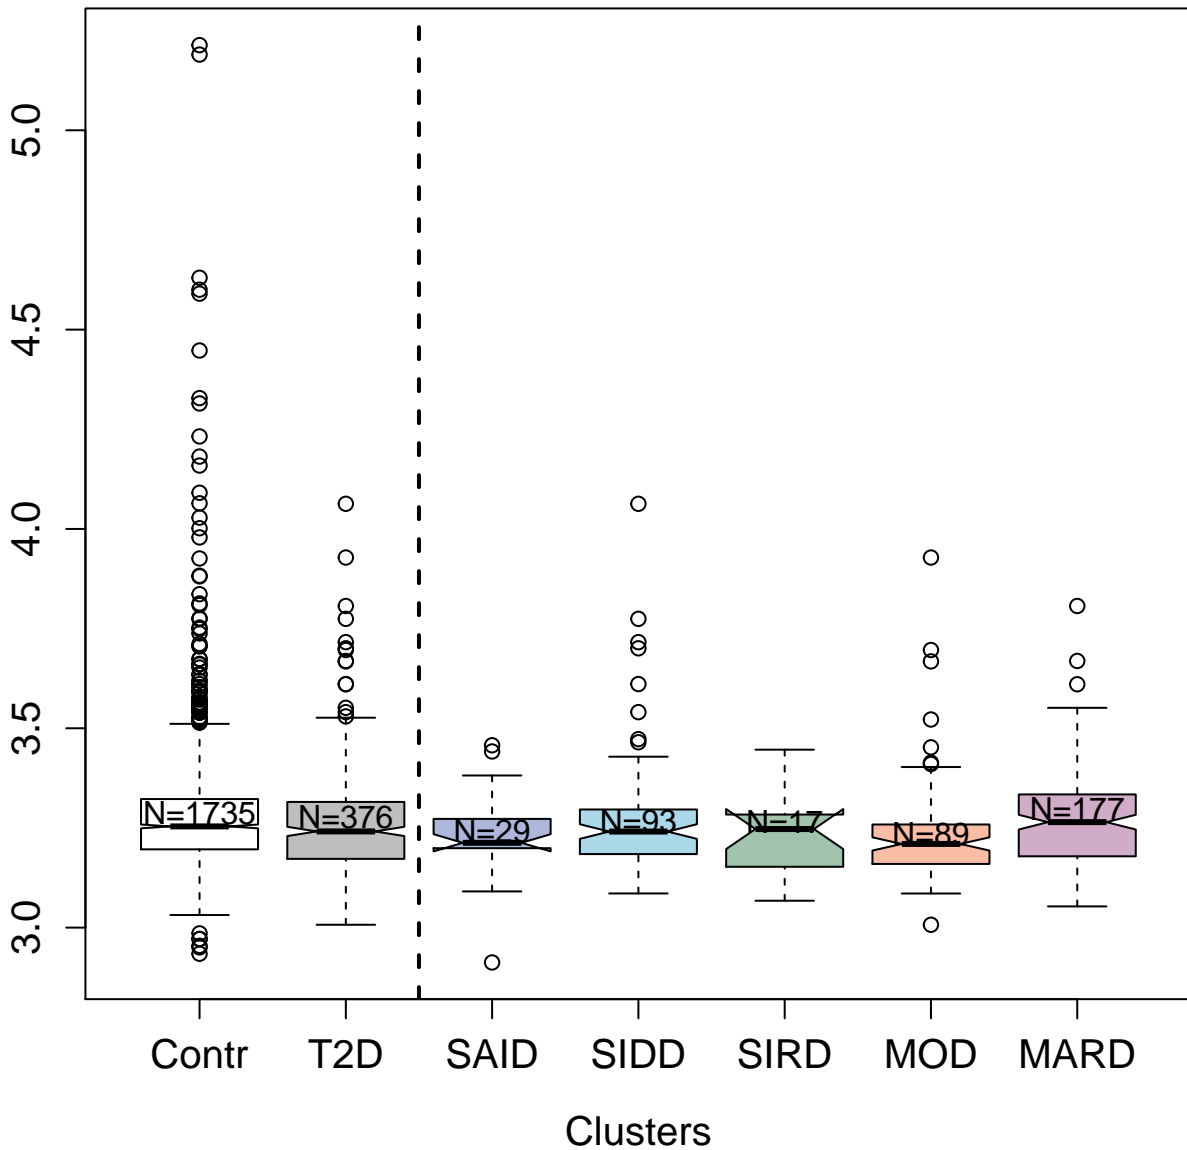

9170-24\_3 : Interleukin-17A

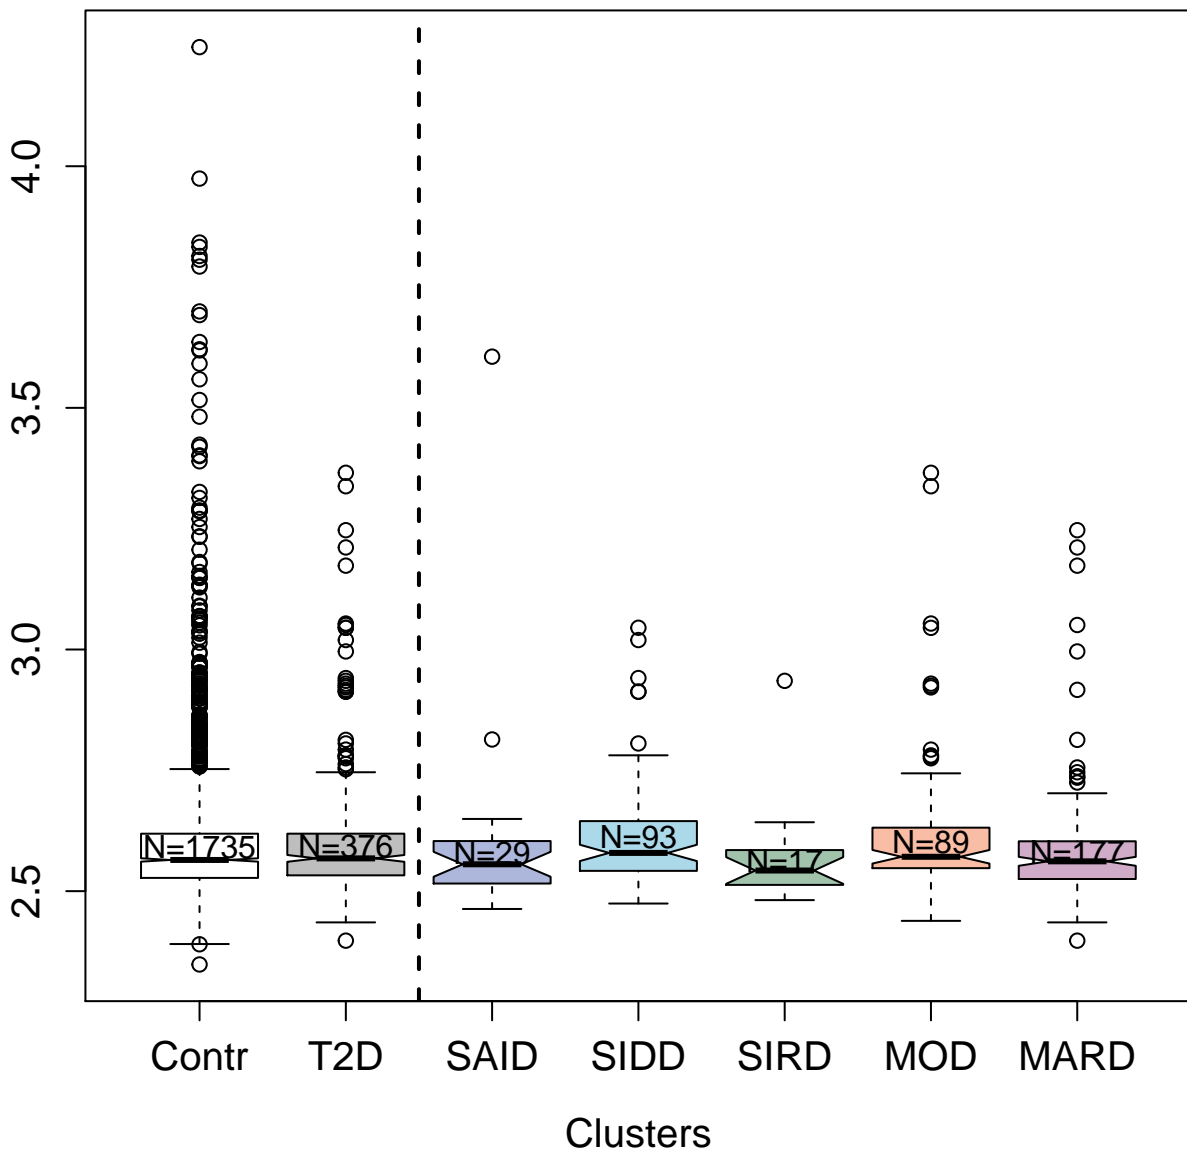

8459-10\_3 : Bone morphogenetic protein 6

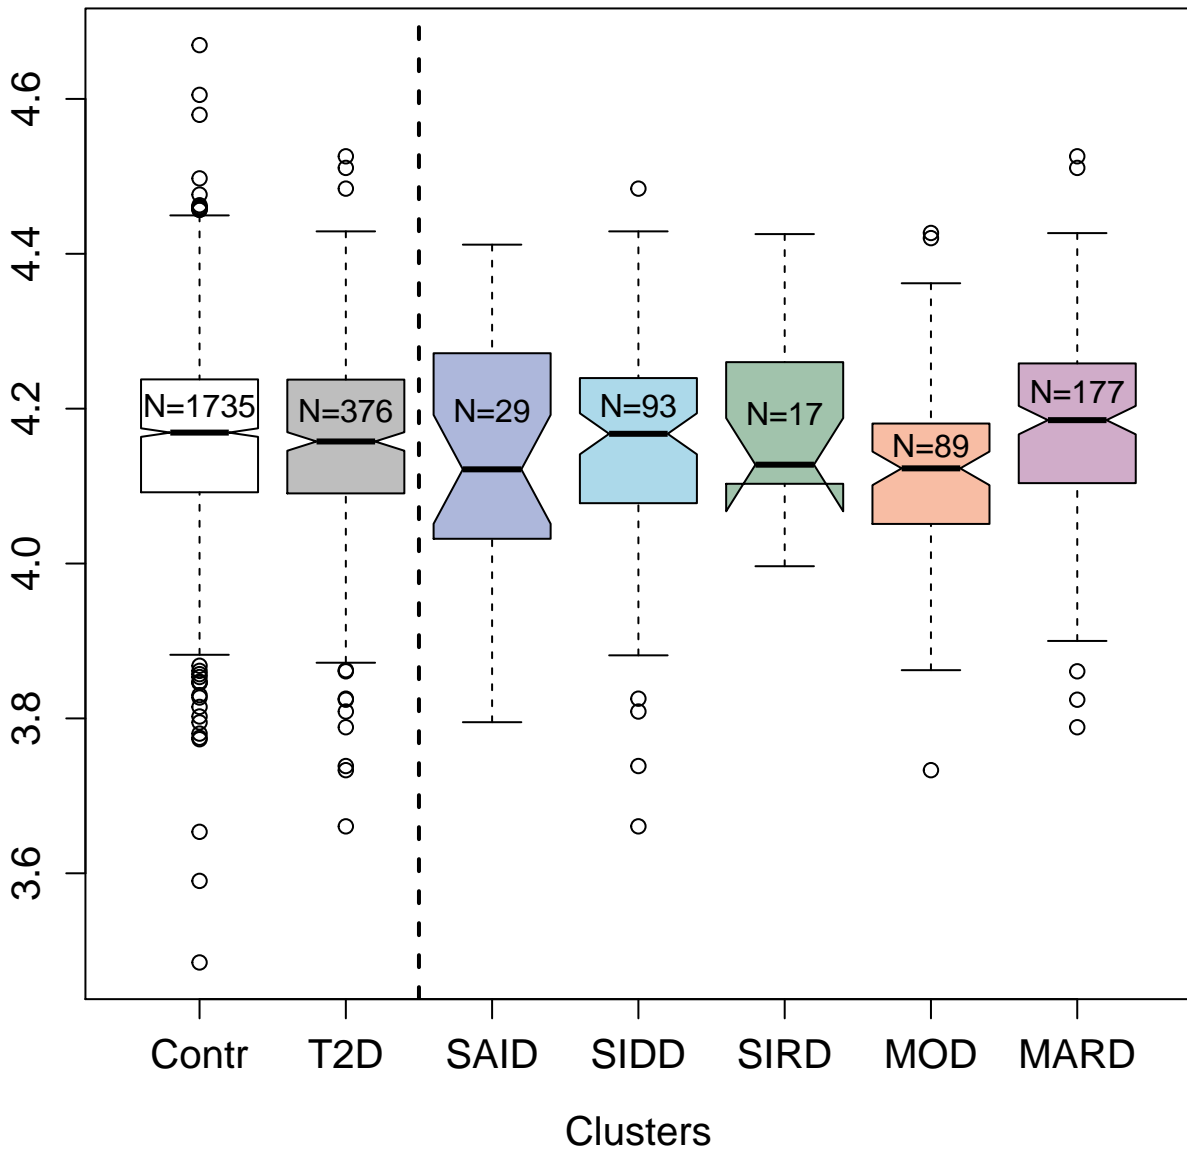

3401-8\_2 : Tyrosine-protein phosphatase  
non-receptor type 2

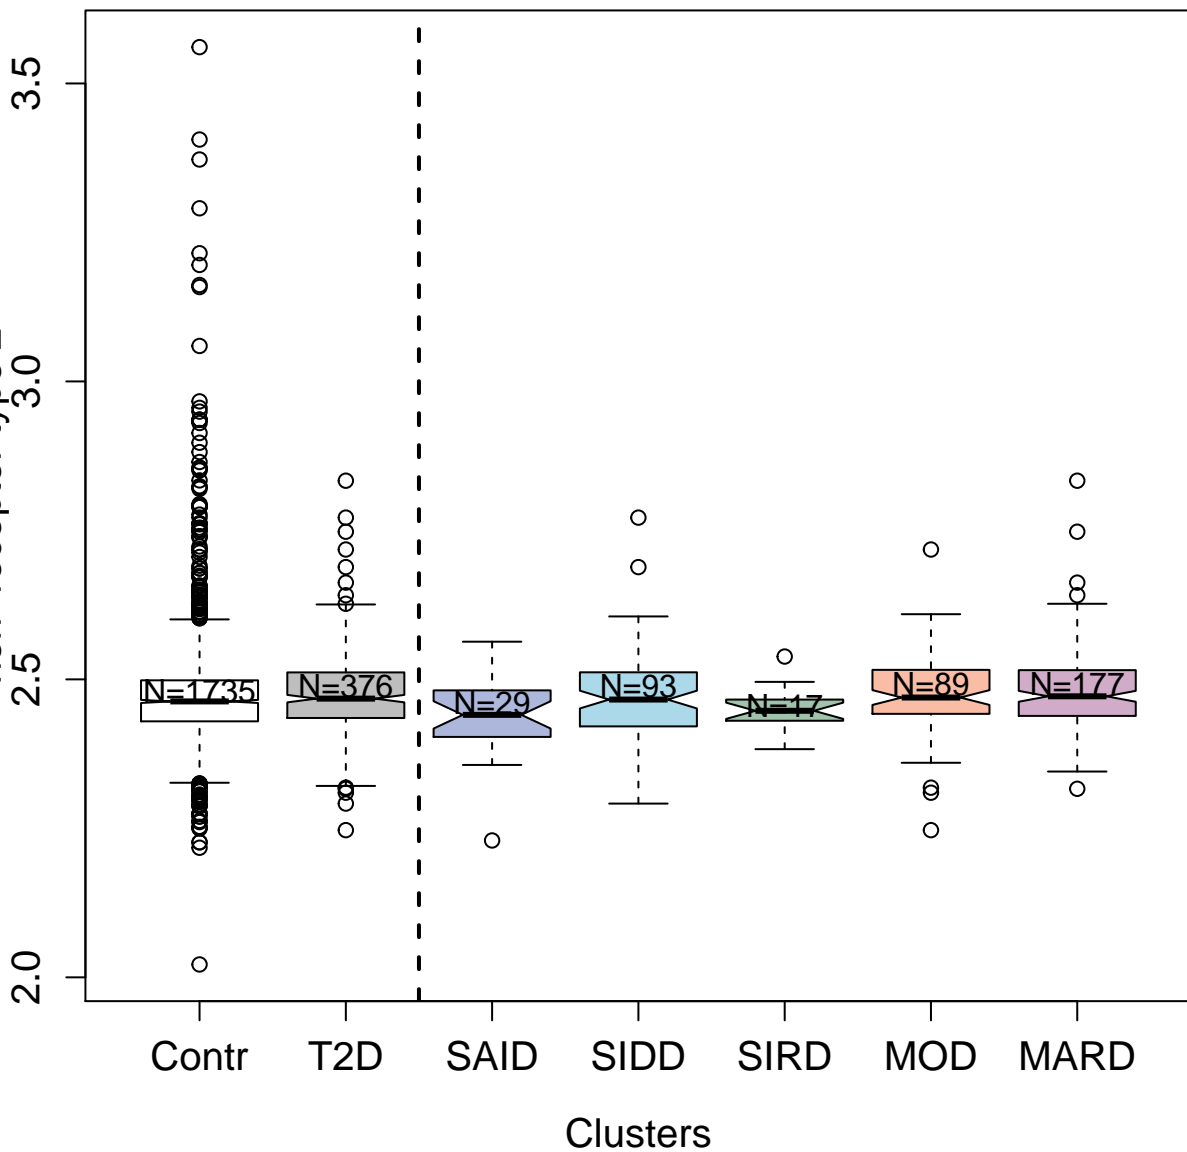



5000-52\_1 : Galectin-3-binding protein

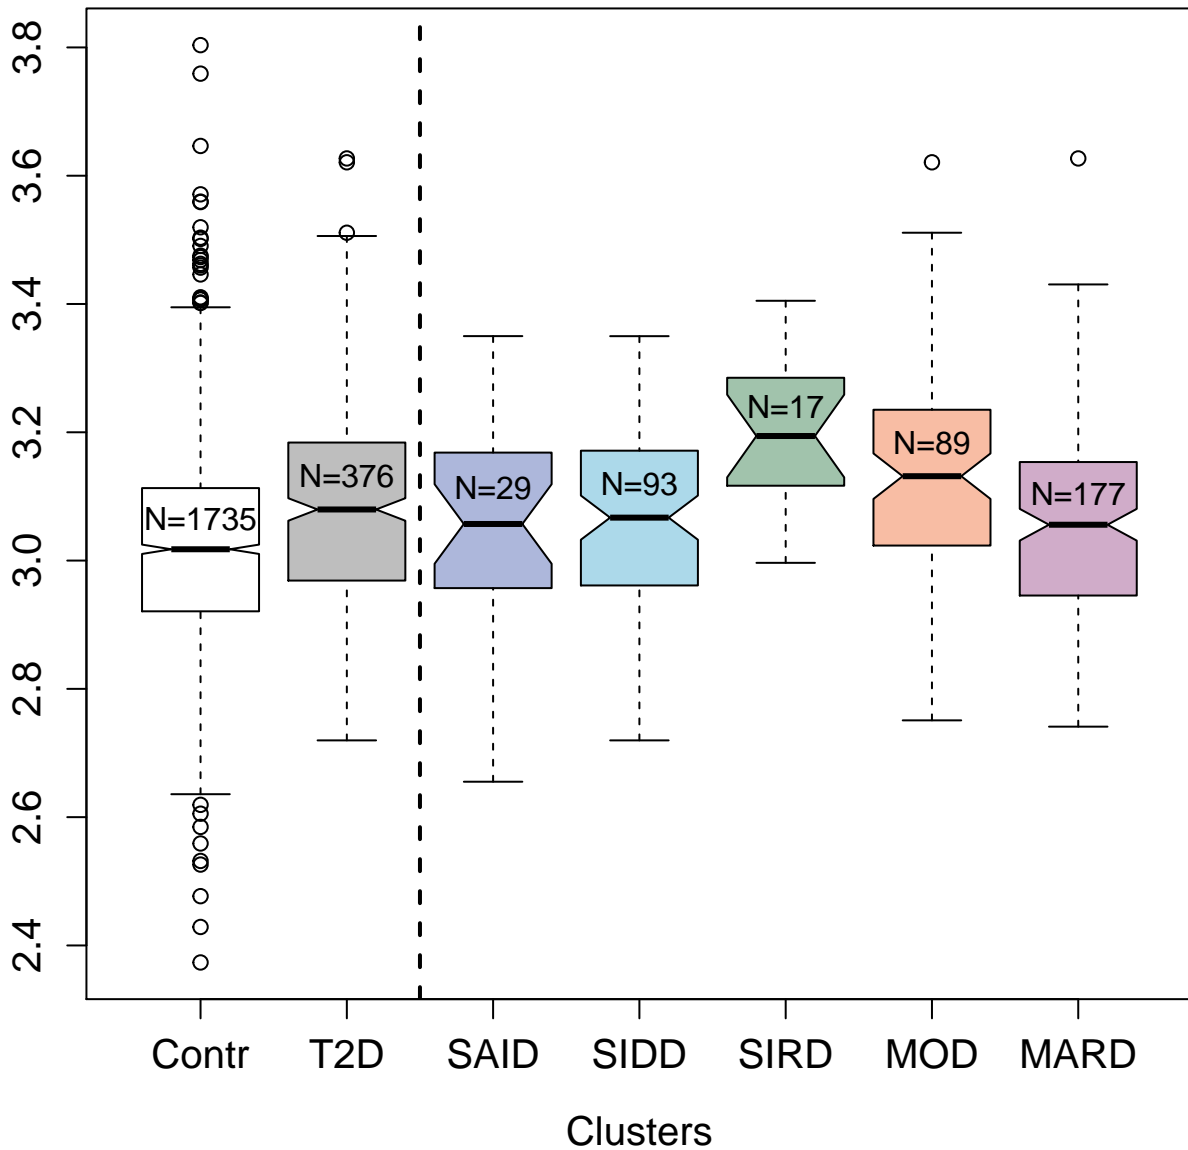

9178-30\_3 : Neuregulin-1

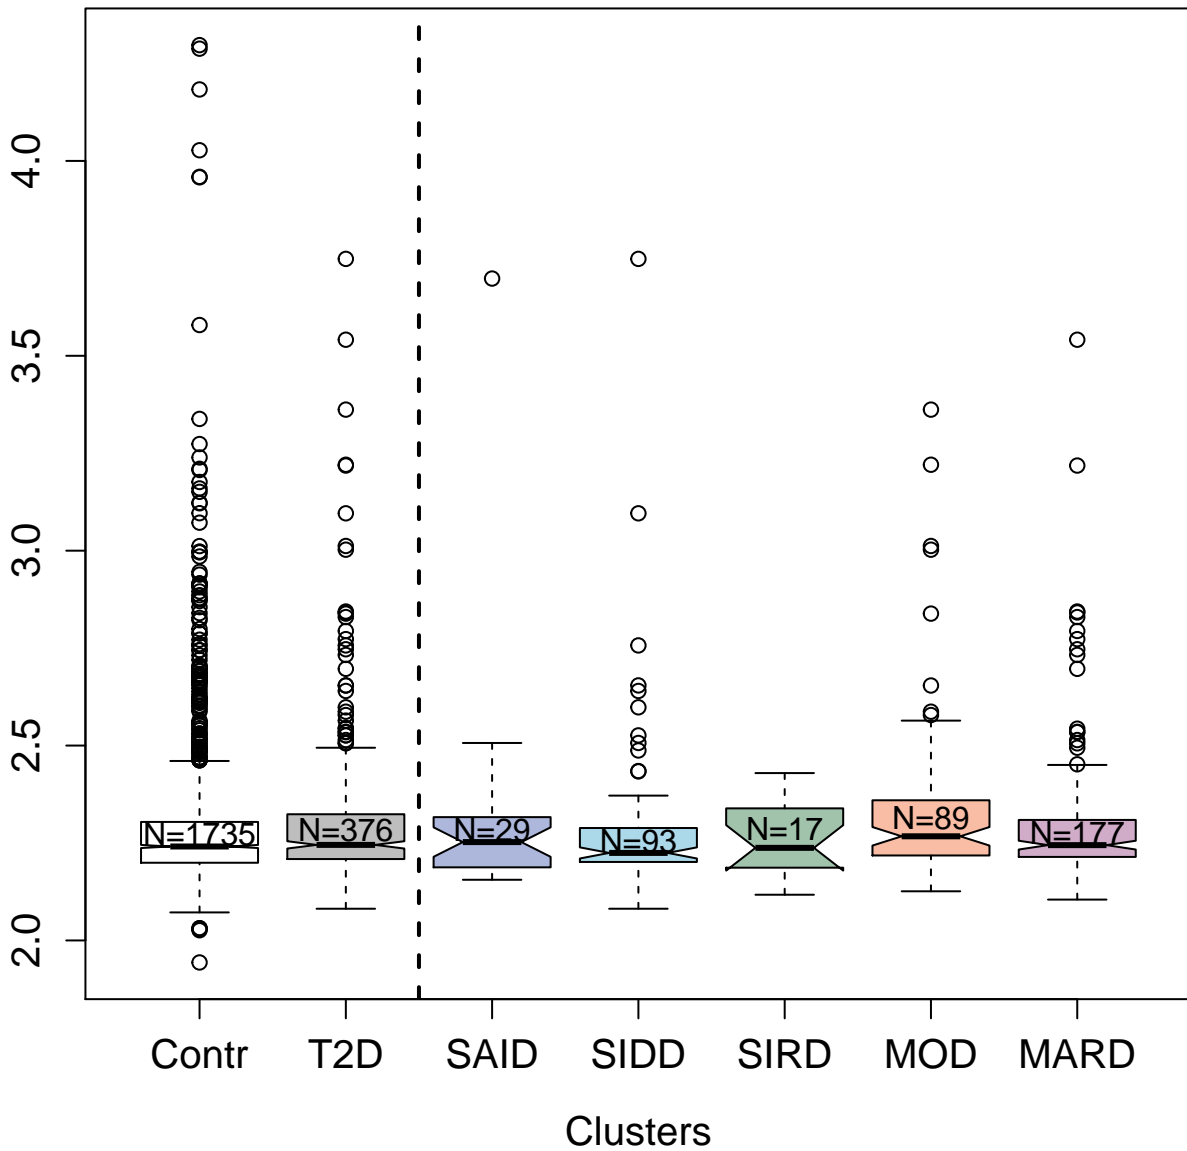

3213-65\_2 : Nidogen-1

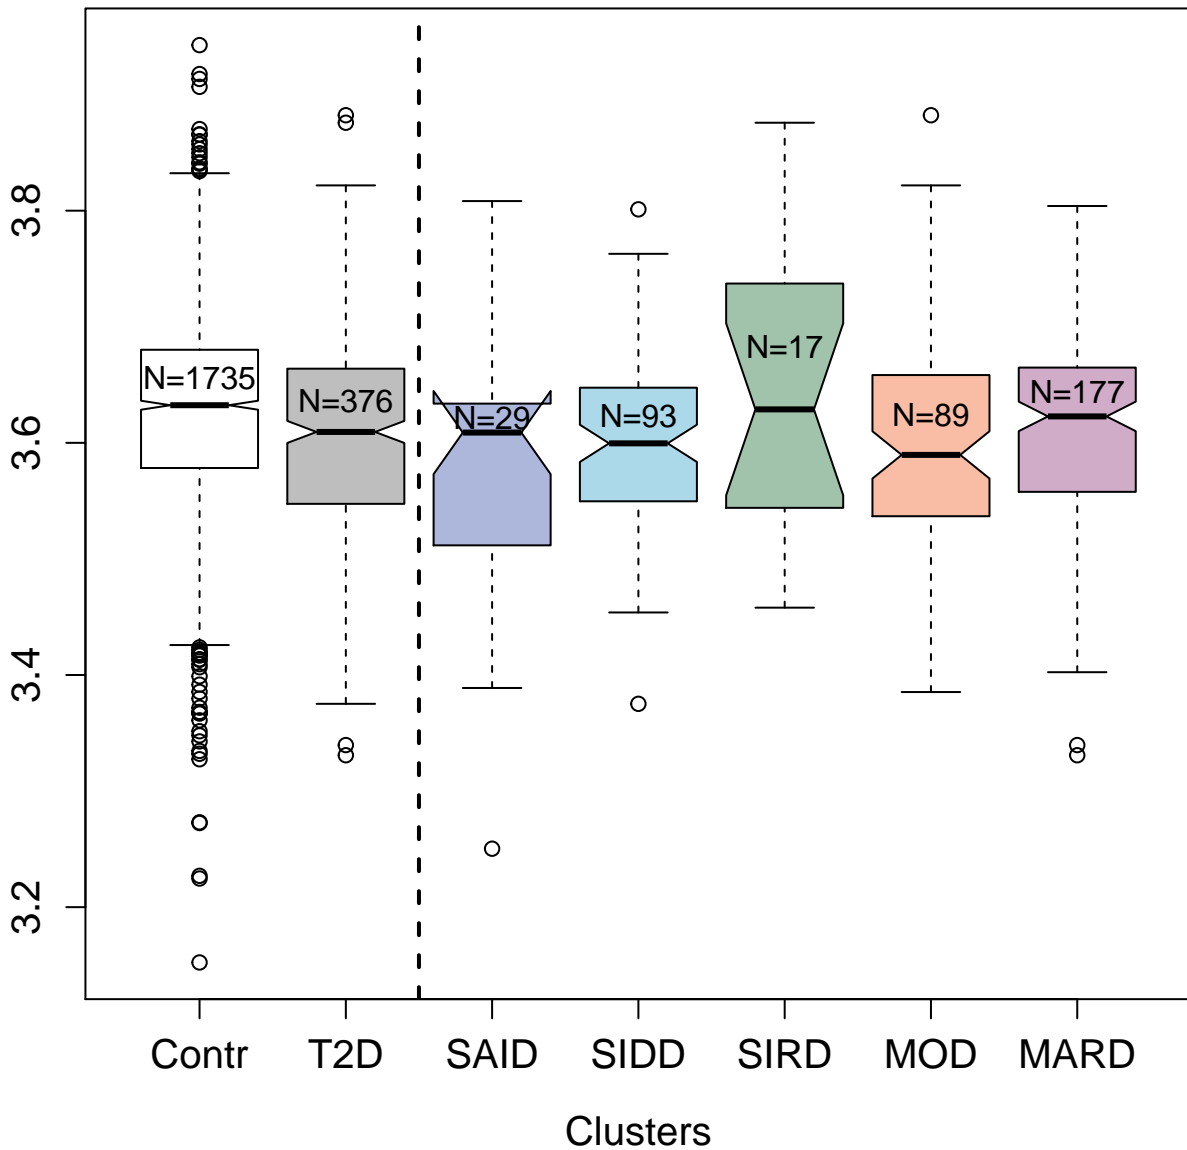

# 5343-74\_3 : Carboxypeptidase E

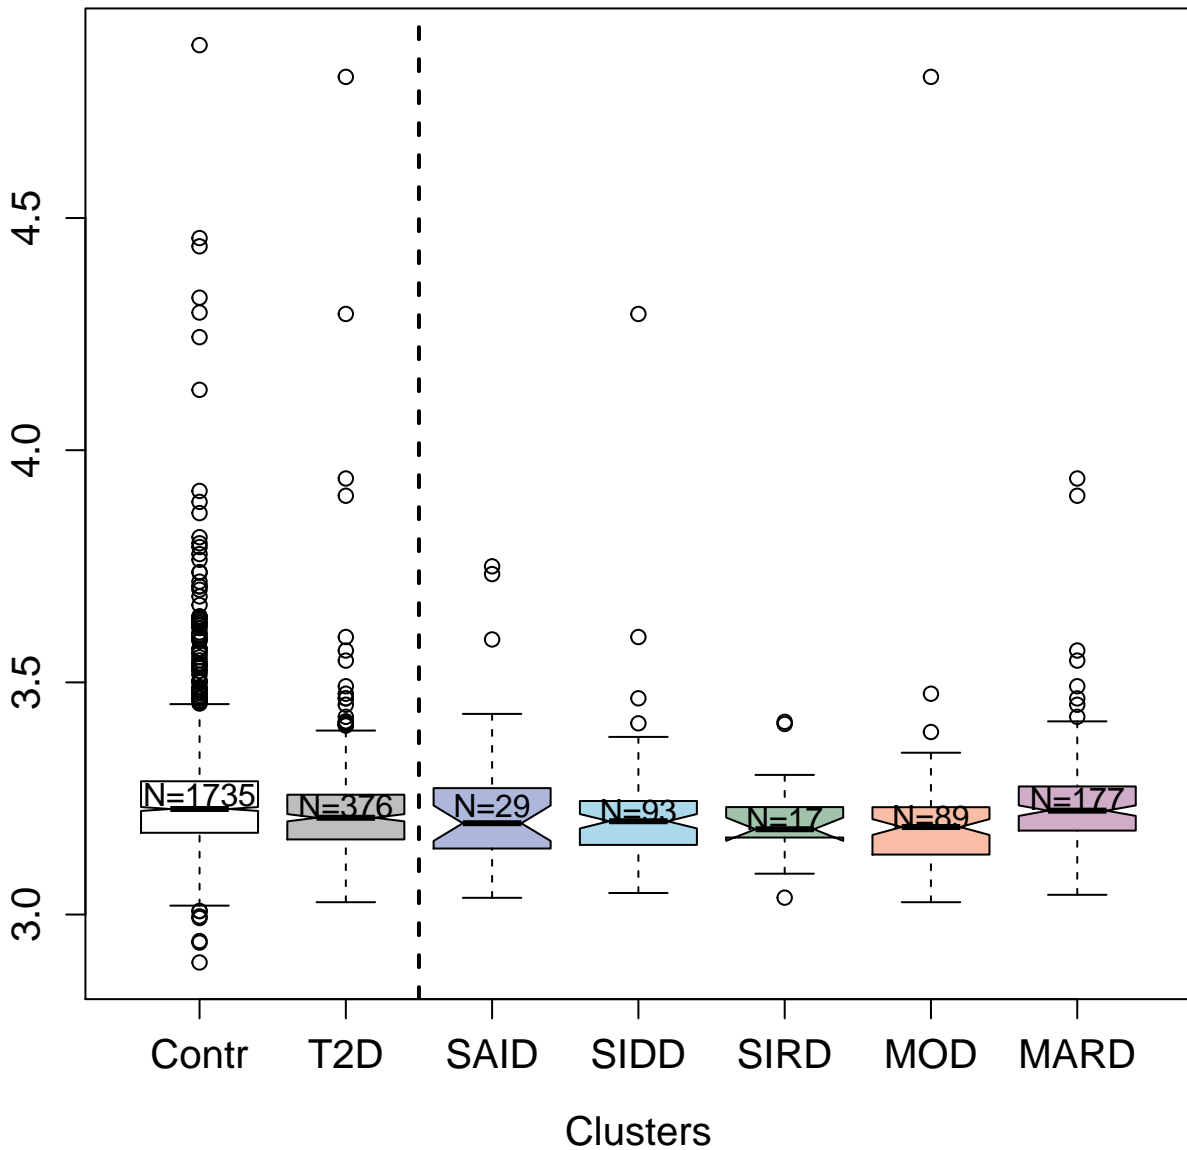

2822-56\_2 : CD97 antigen

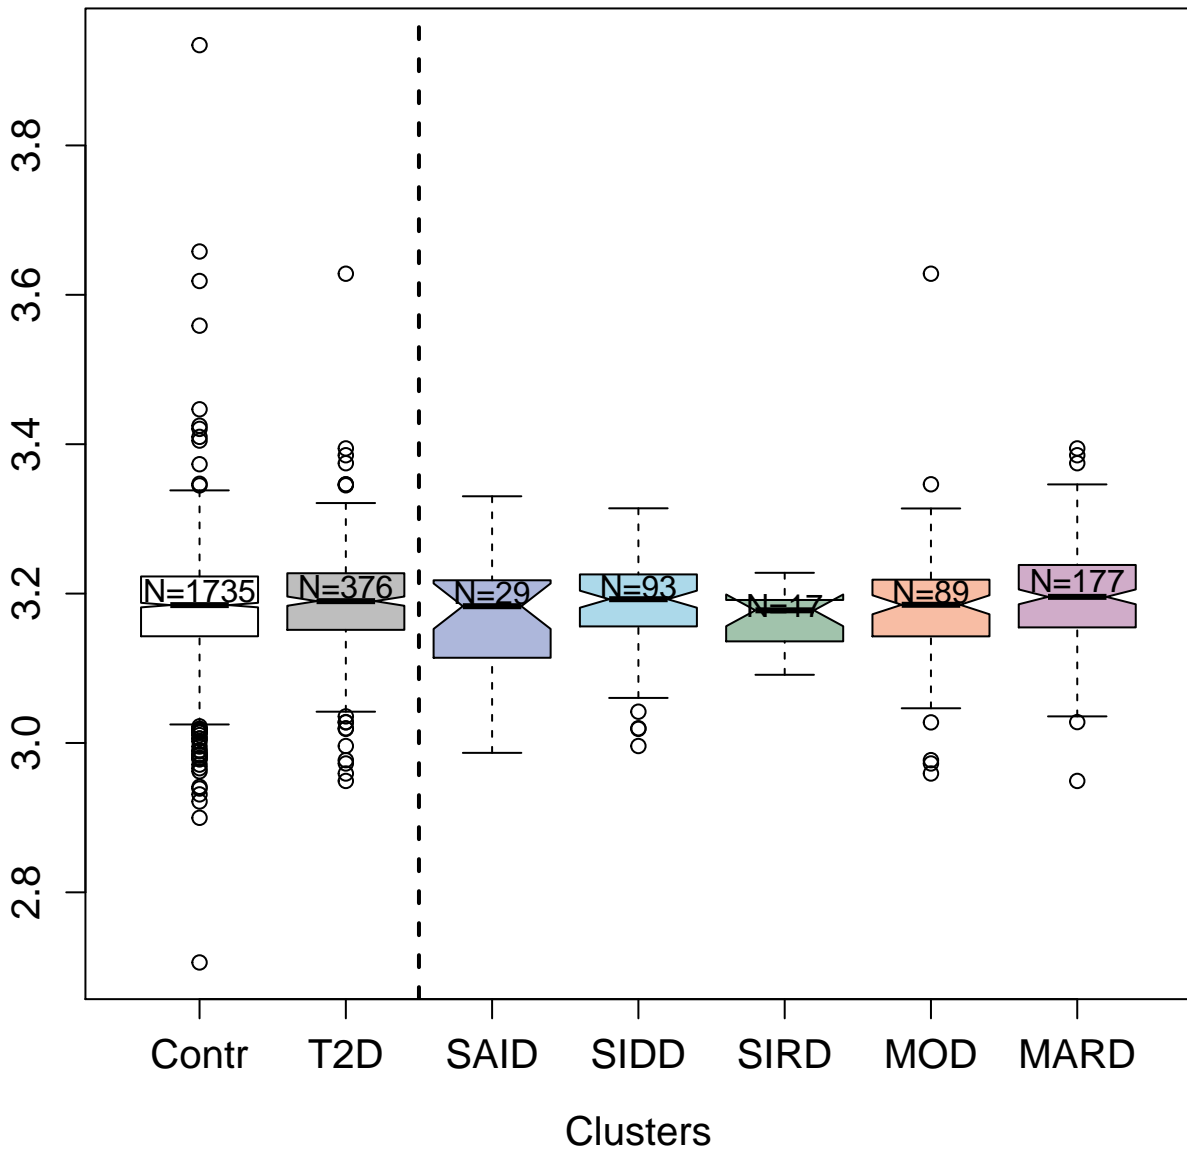

2447-7\_4 : Group IIE secretory phospholipase A2

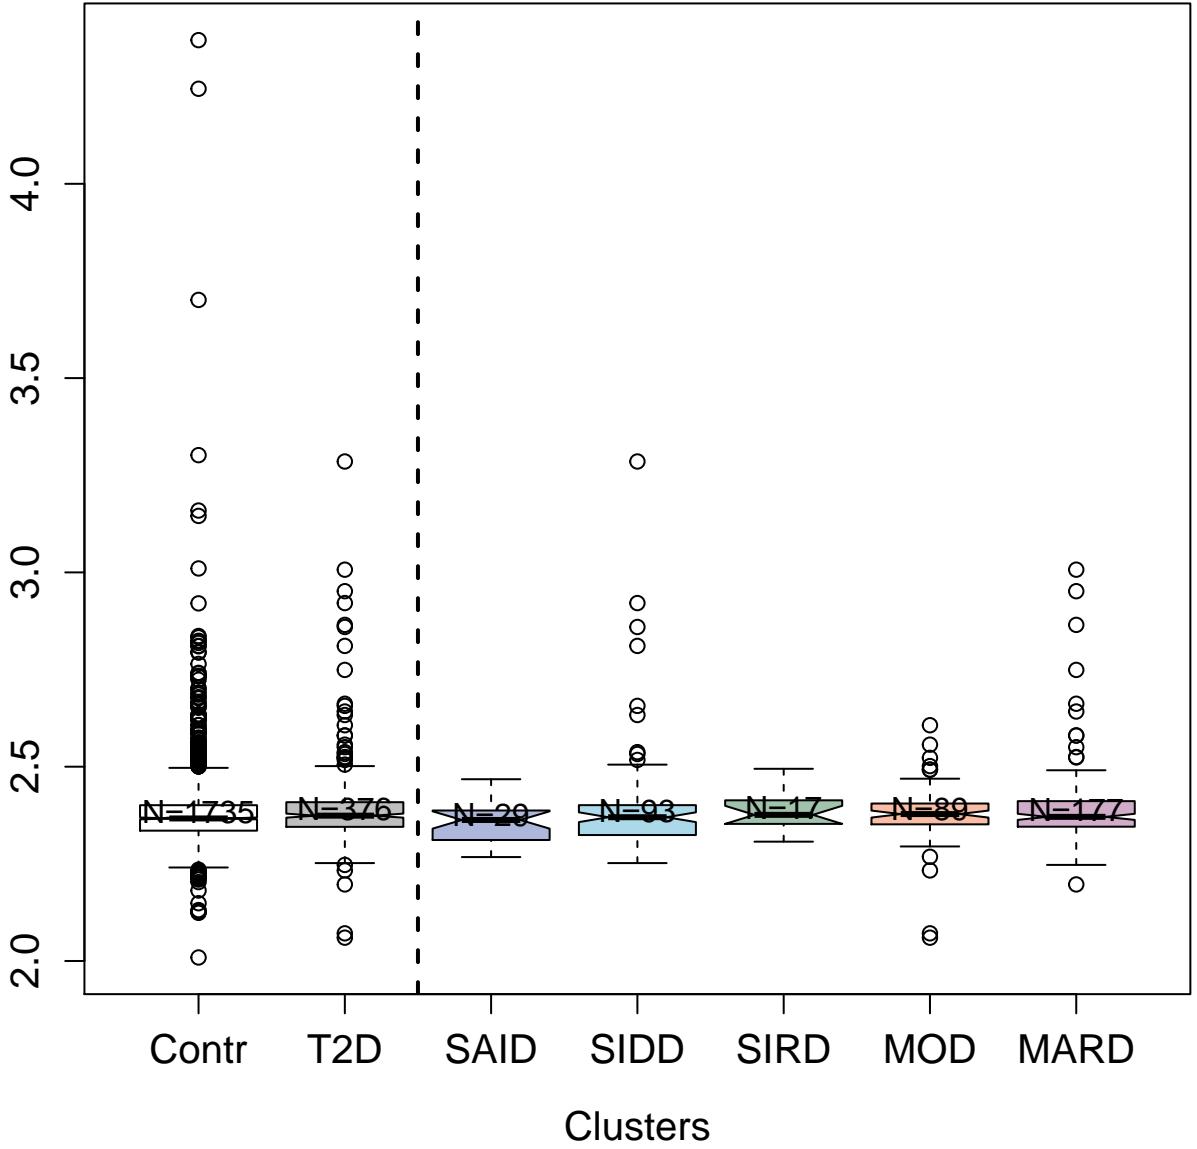

10362-35\_3 : Myc proto-oncogene protein

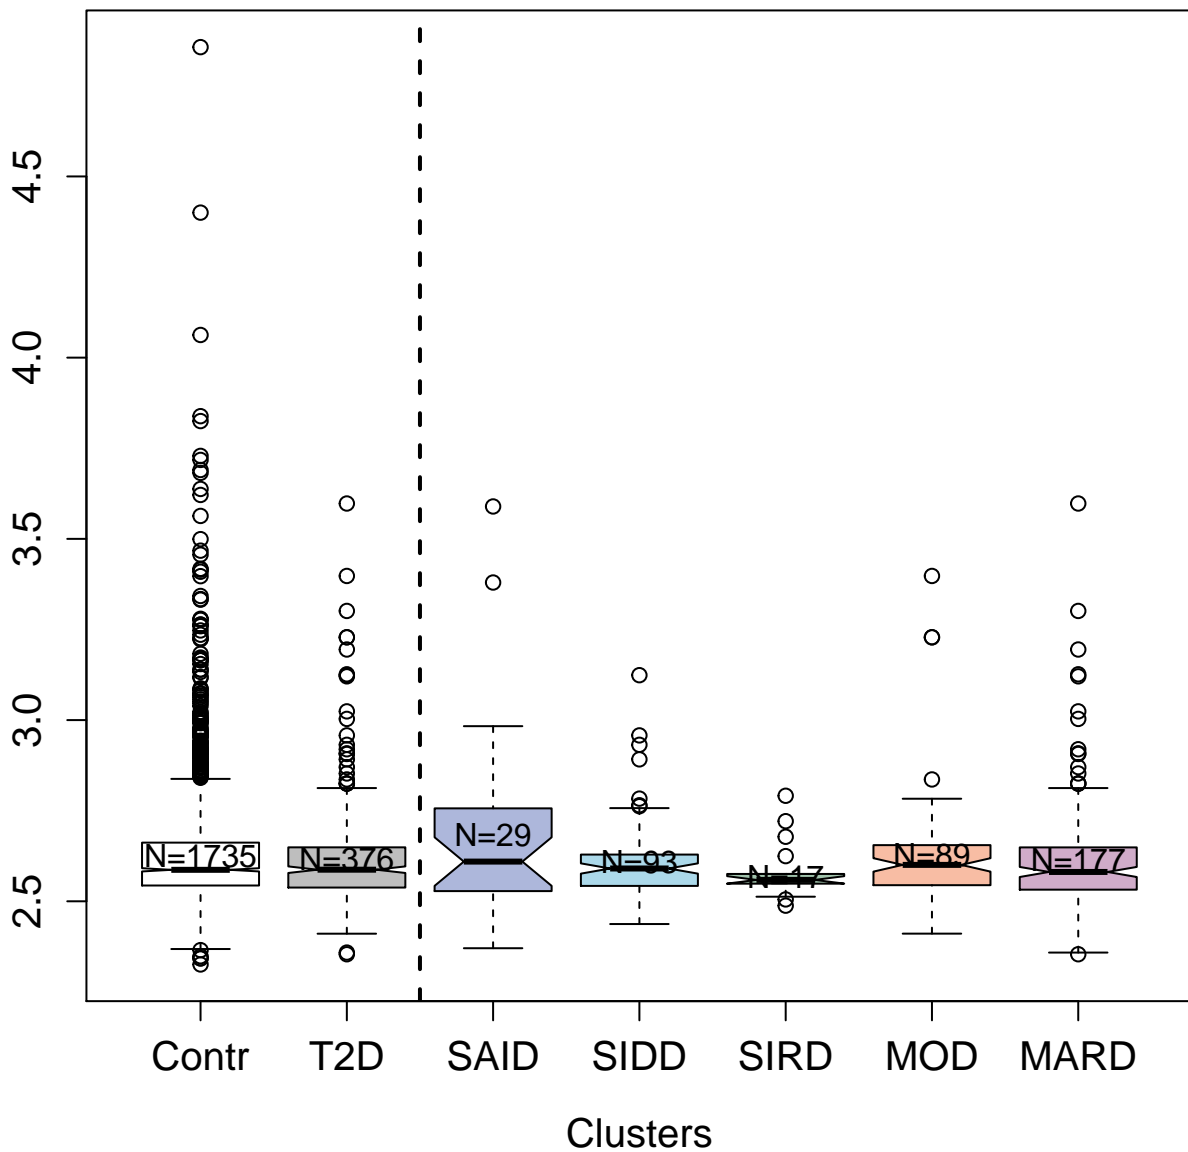





5882-34\_2 : Elongation factor 1-beta

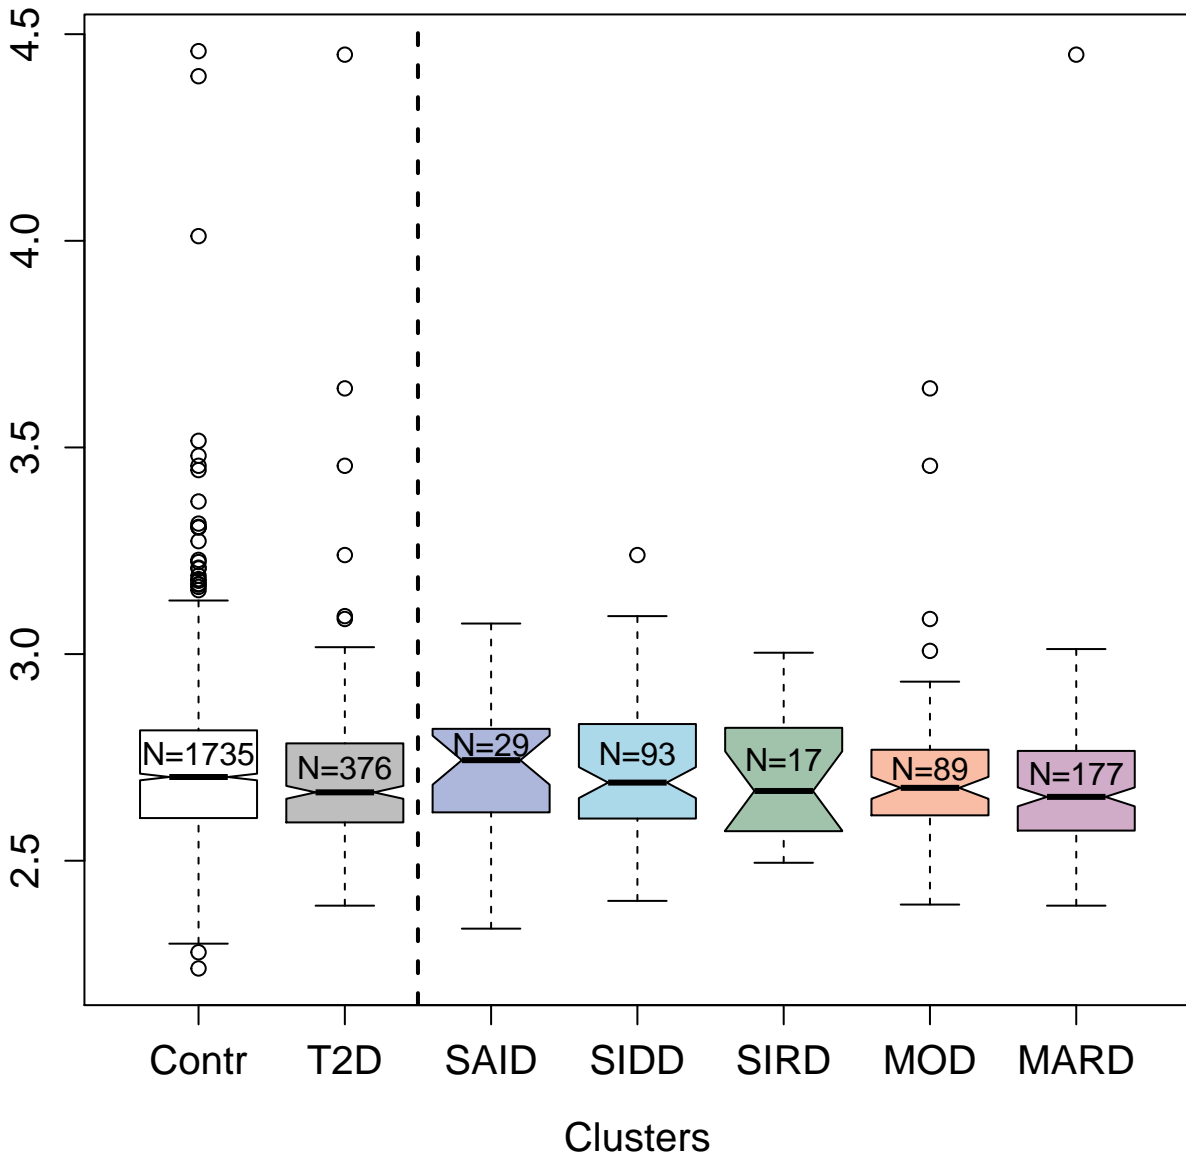

13114-50\_3 : Lumican

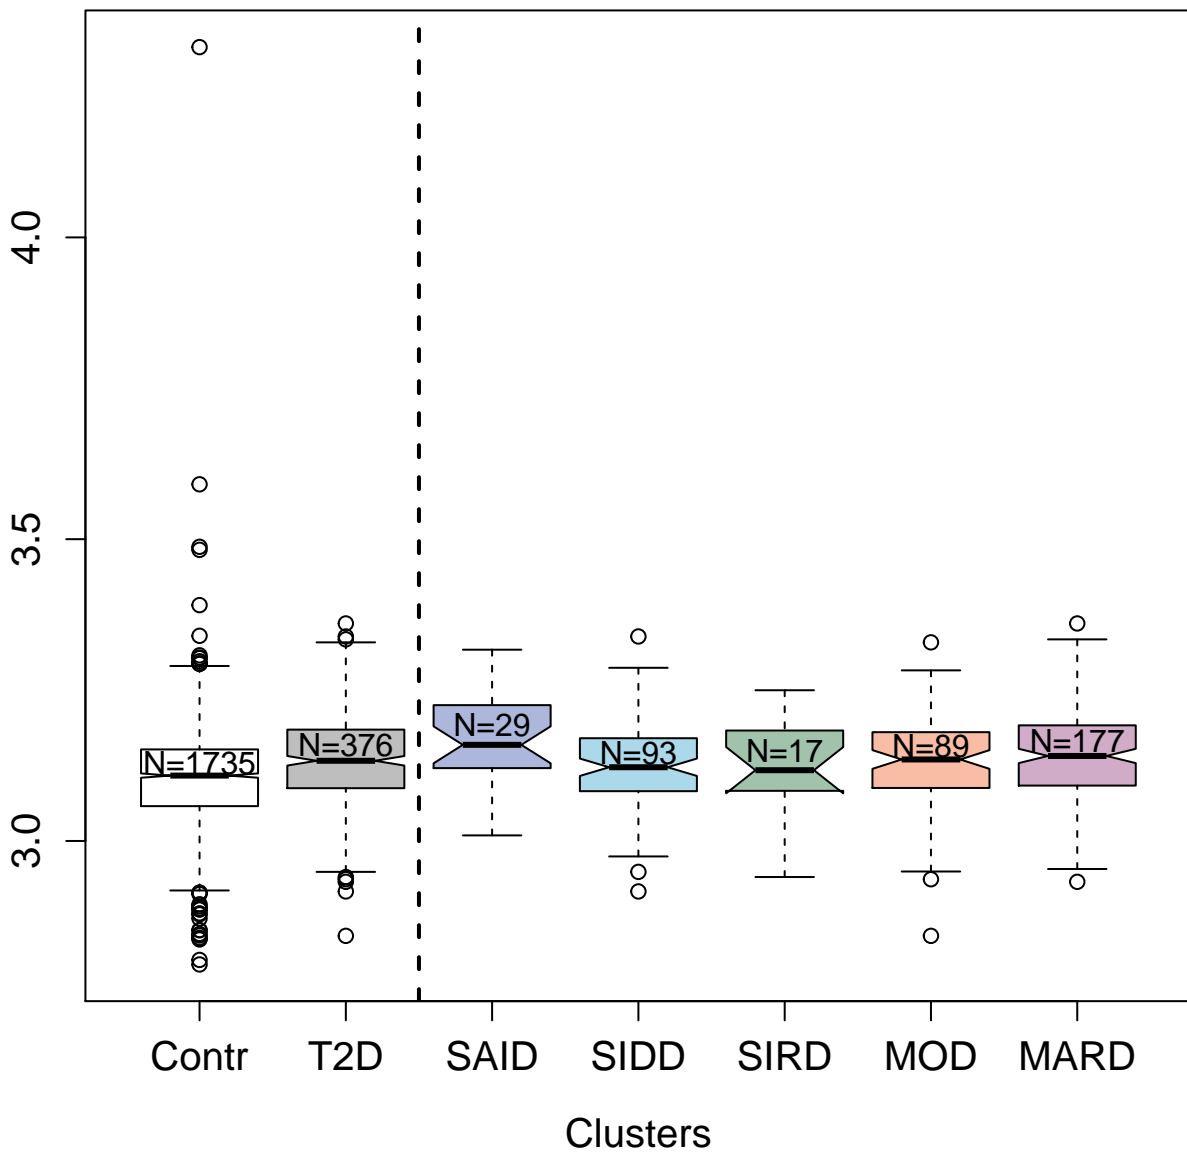

3647-49\_4 : Toll-like receptor 4:Lymphocyte antigen 96 complex

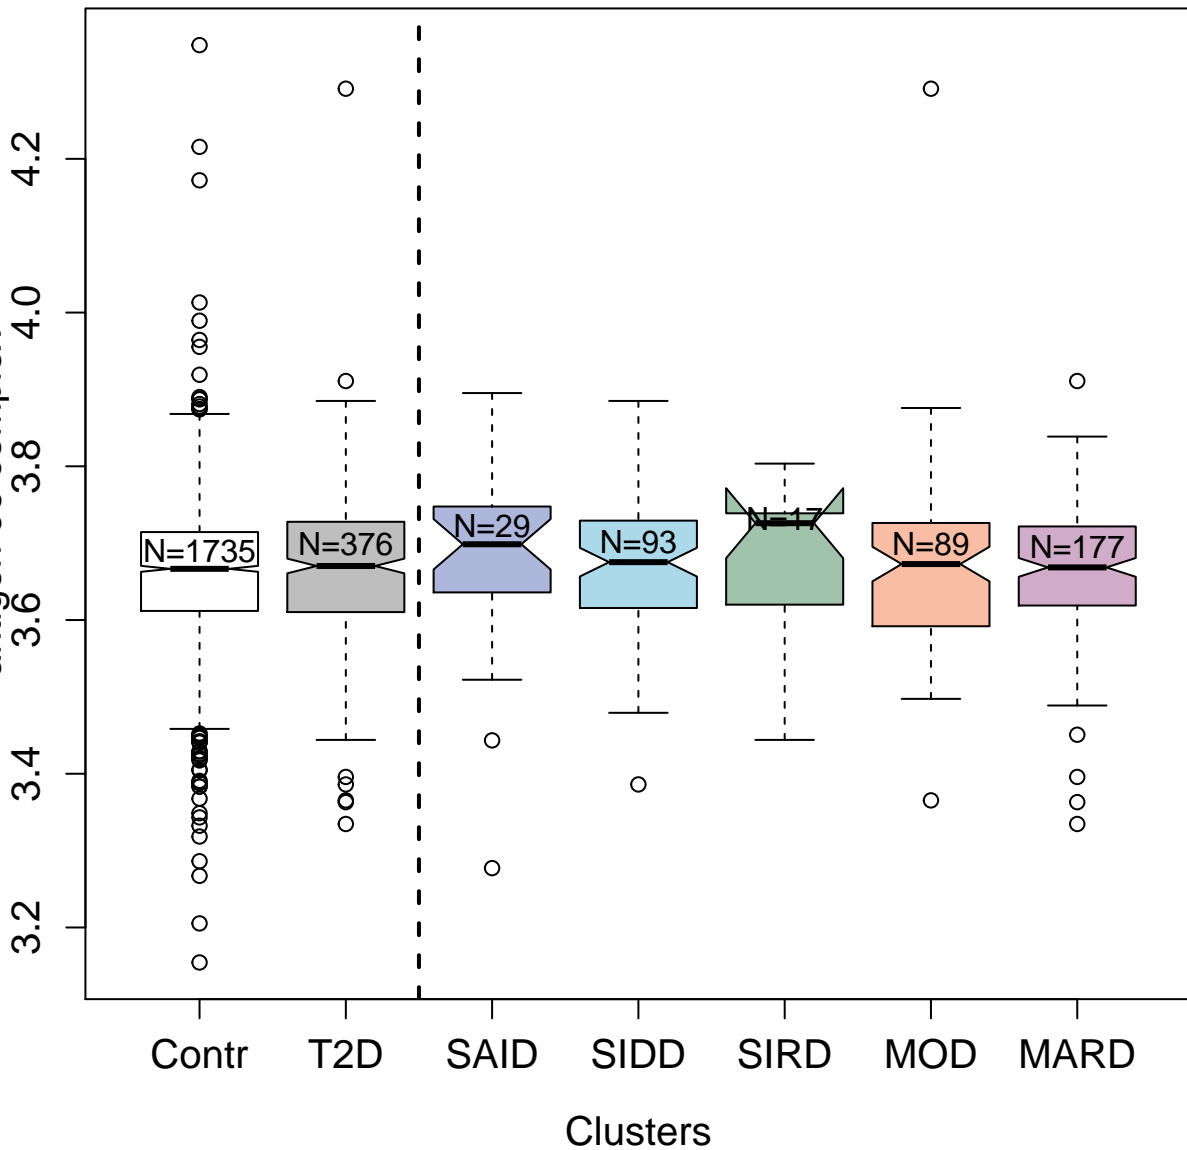

5271-5\_2 : Ras-related C3 botulinum toxin substrate 3

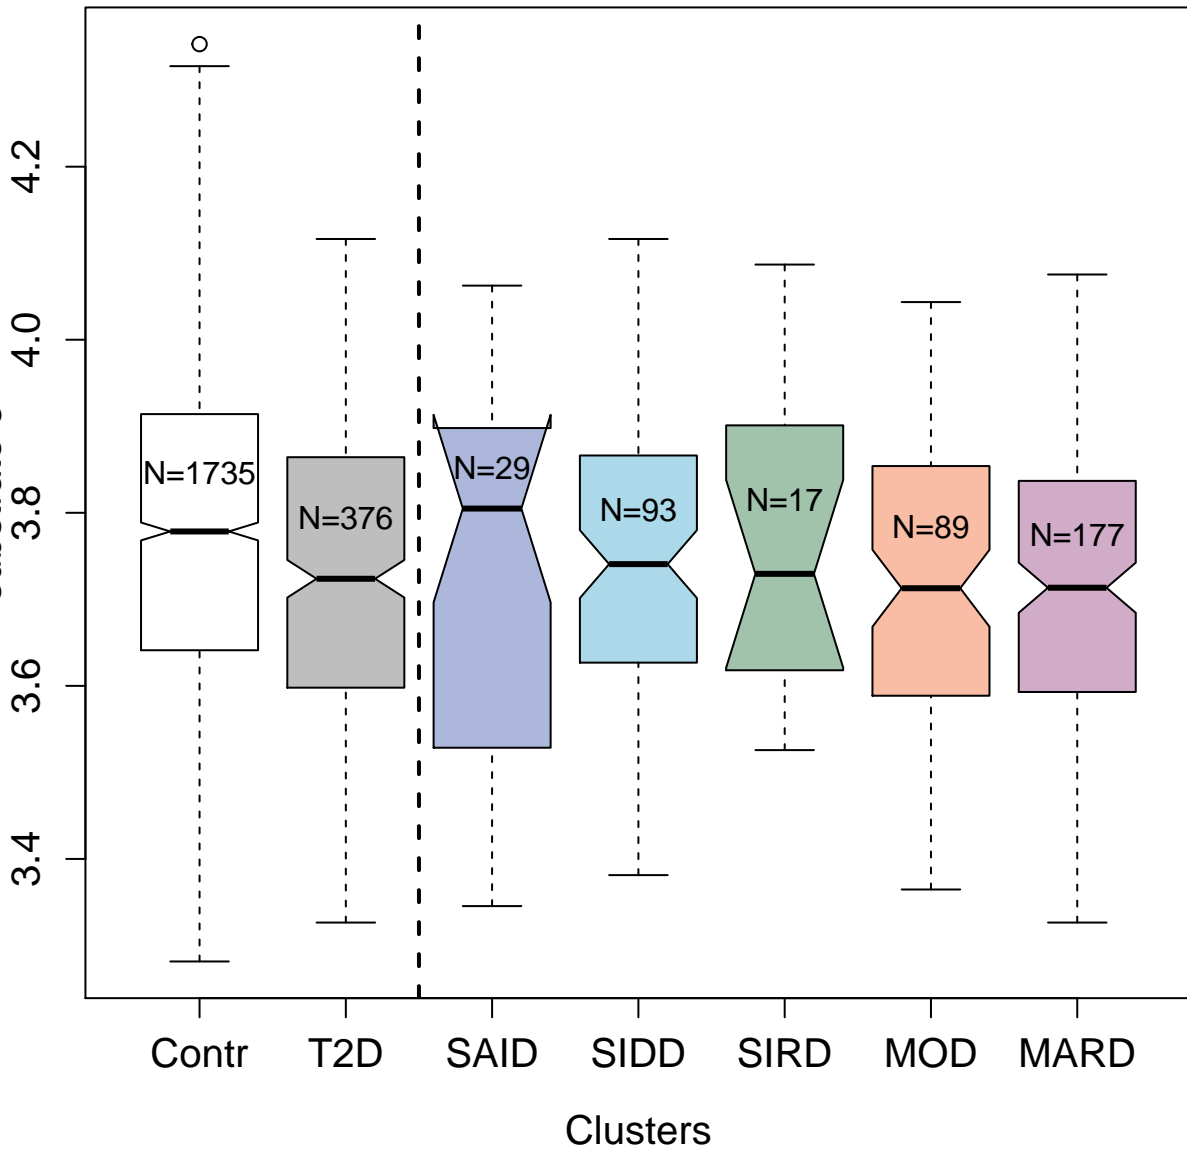

5128-53\_3 : SLAM family member 6

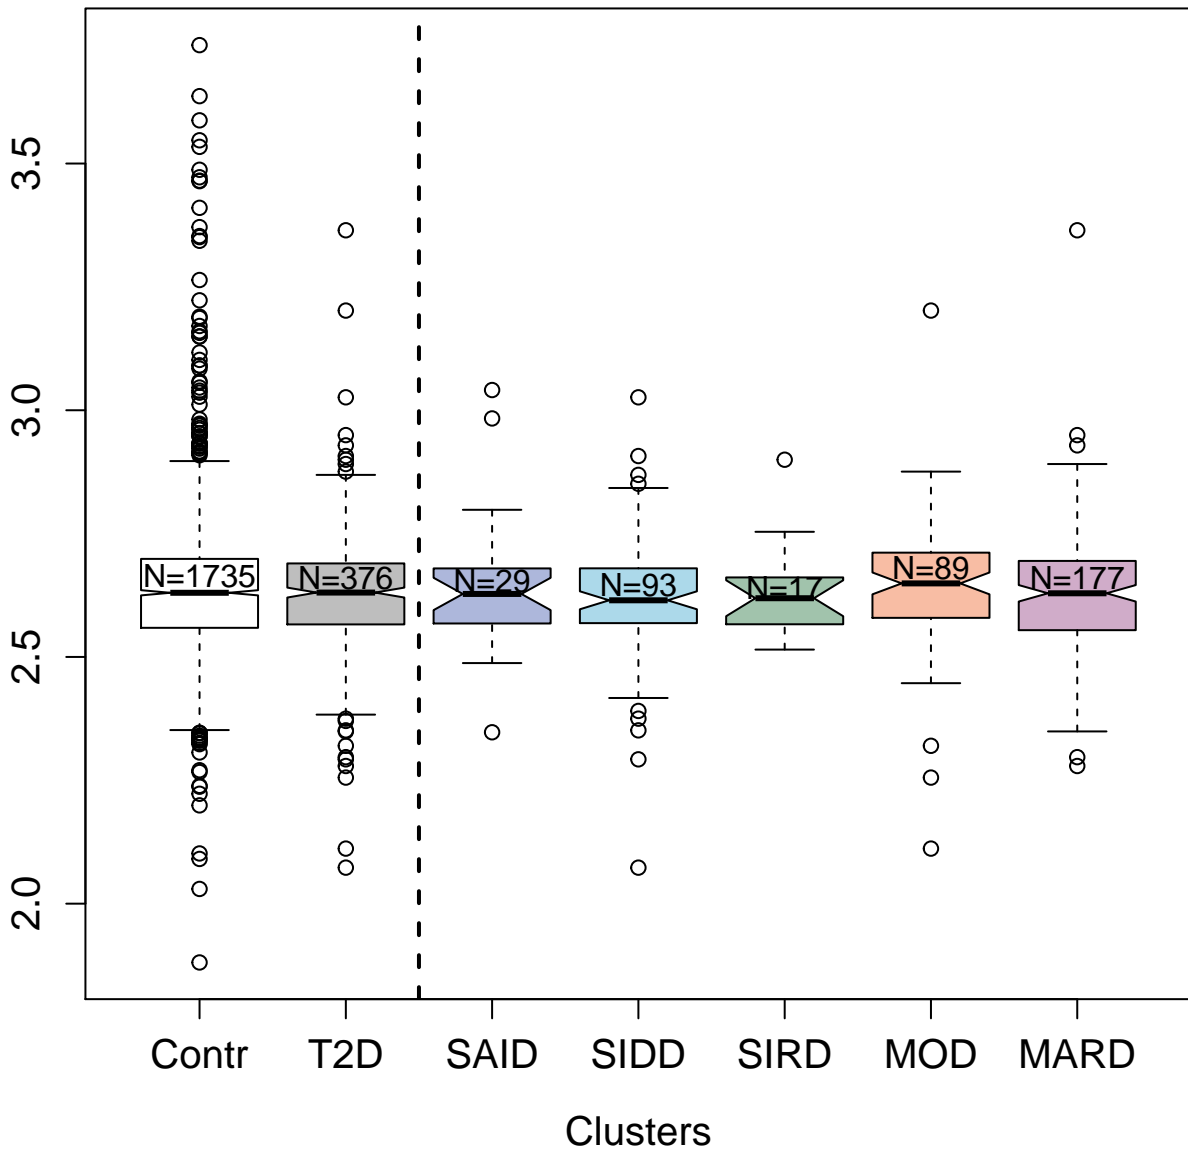

4997-19\_1 : Eukaryotic initiation factor 4A-III

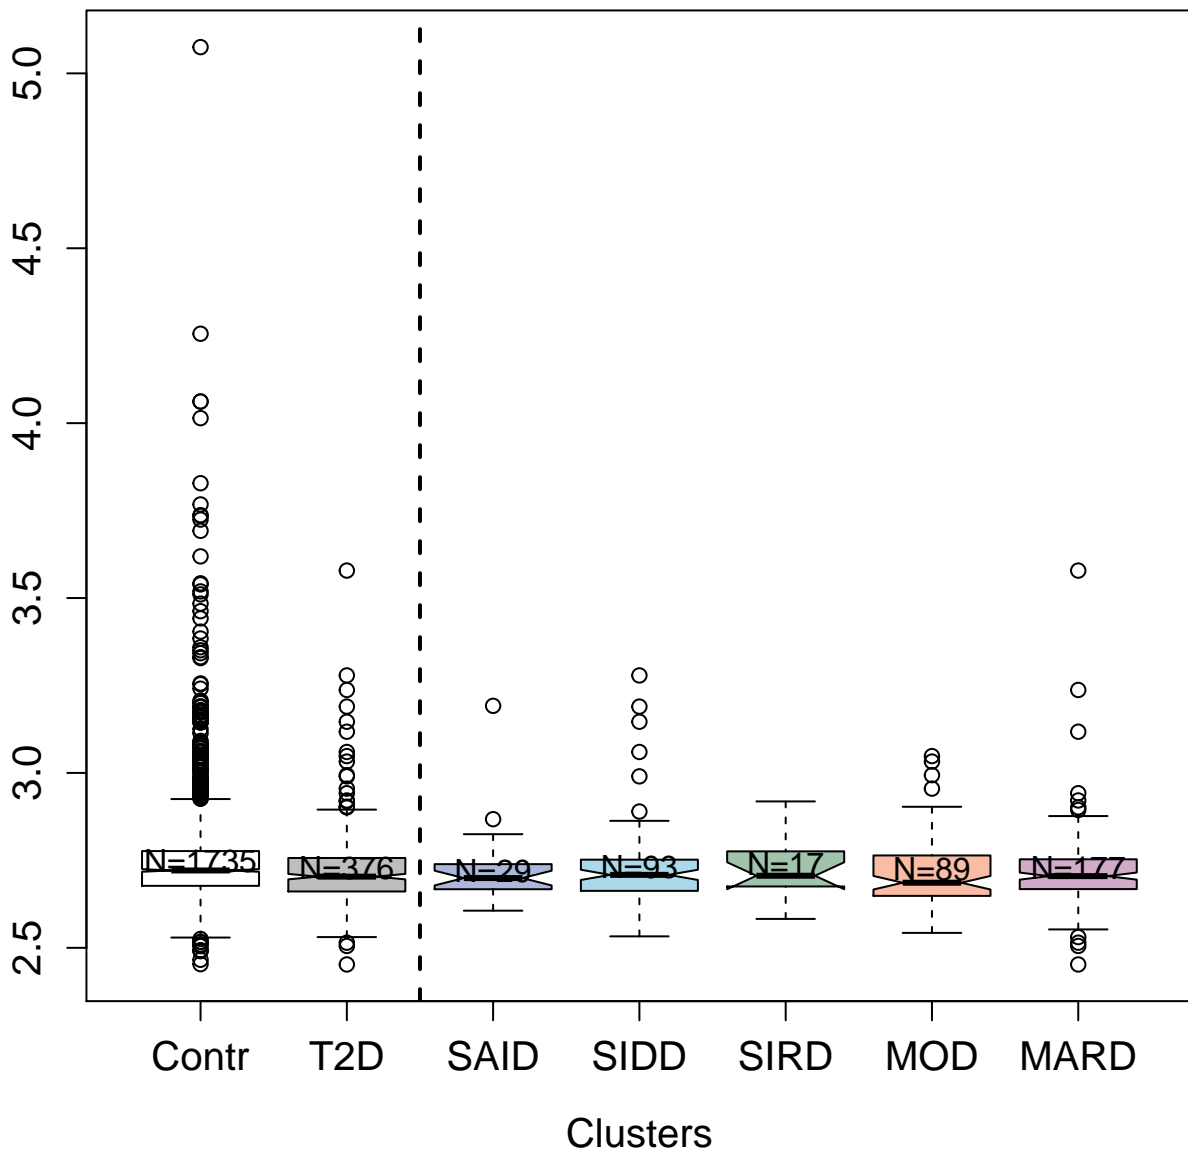

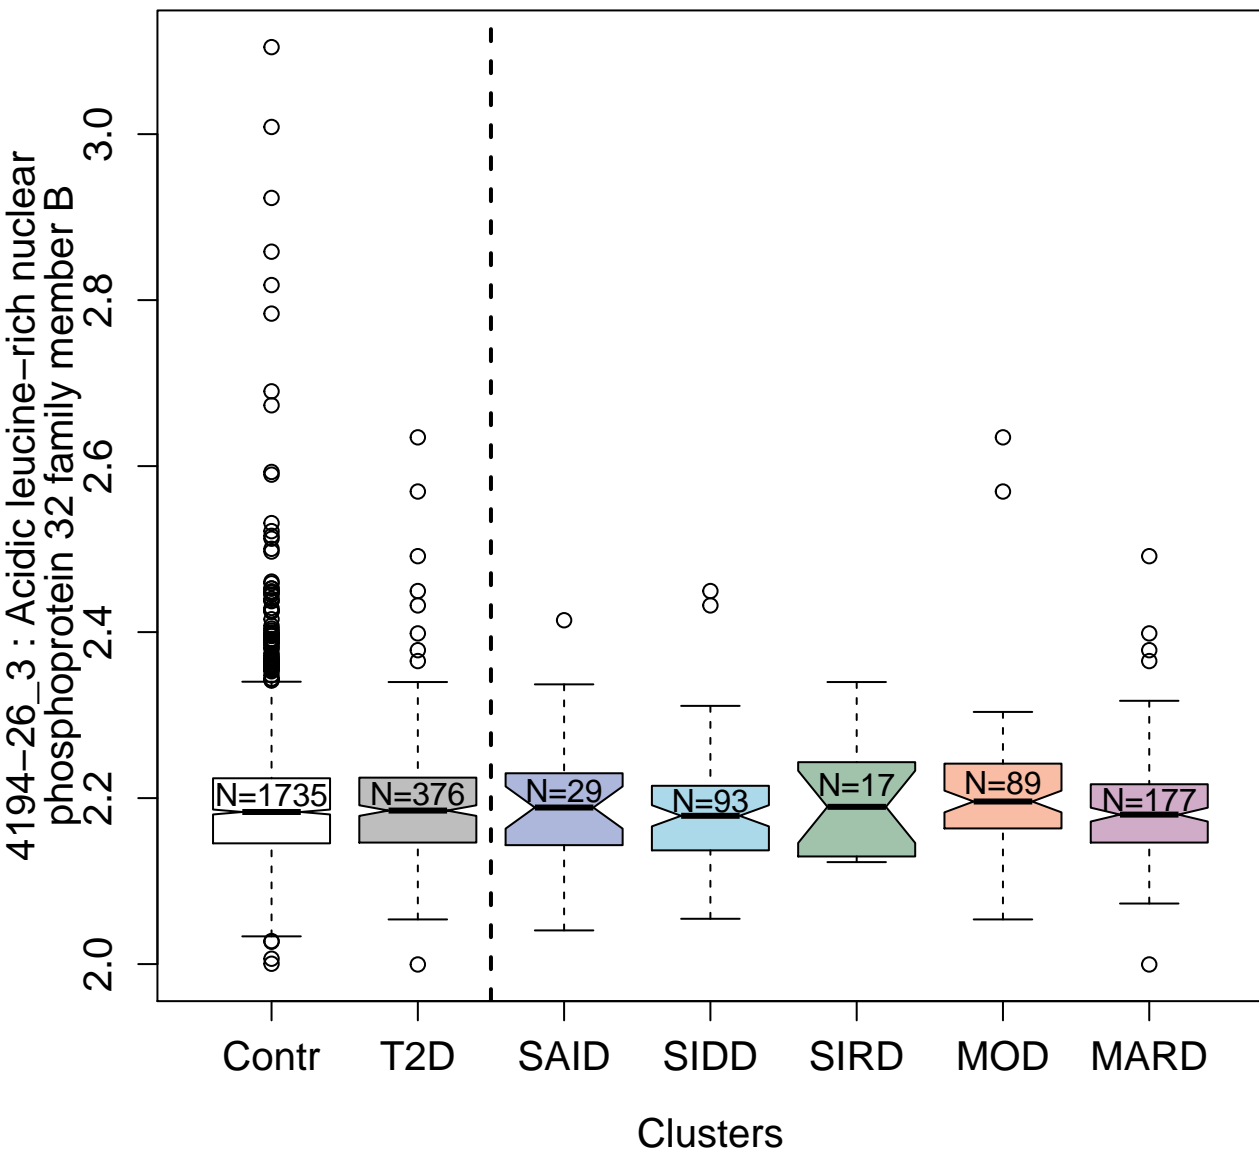

4956-2\_1 : Epireguin

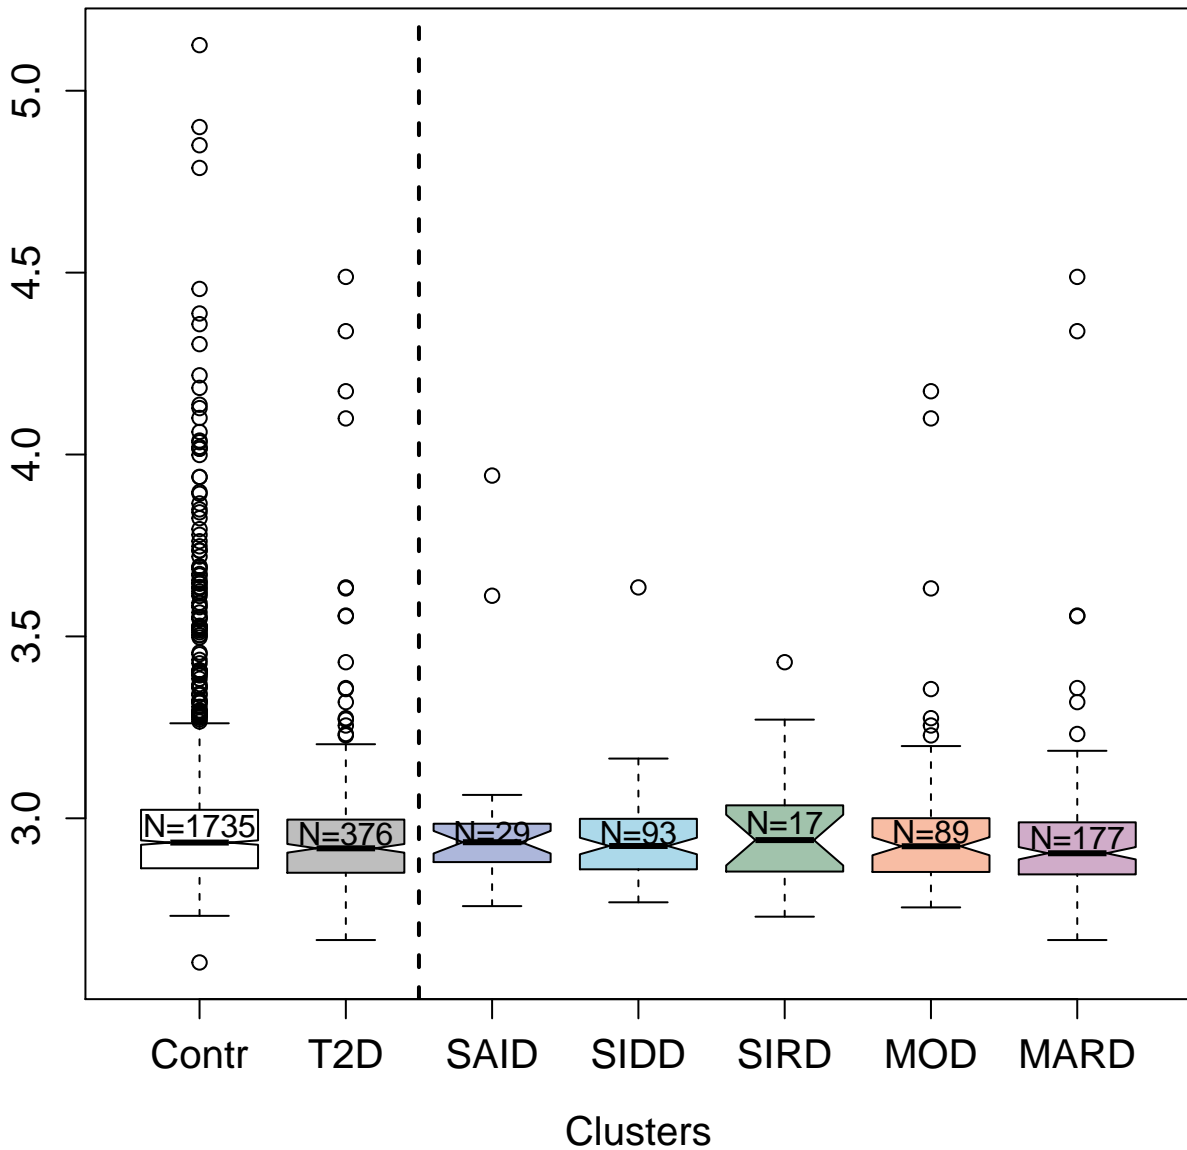



5437-63\_3 : Fatty acid-binding protein; heart

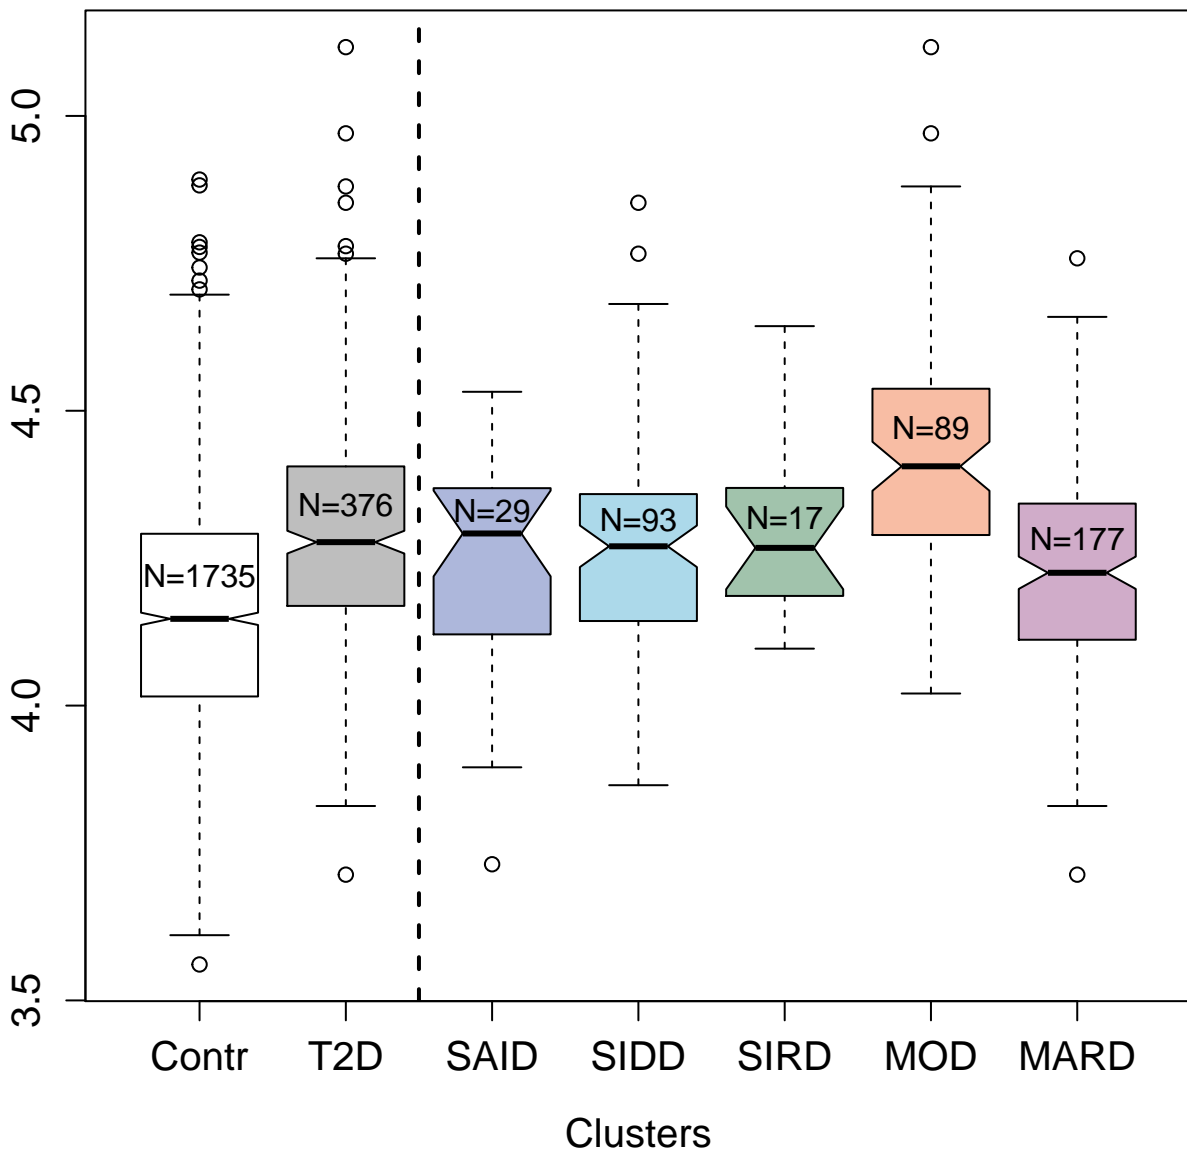

3585-54\_4 : Basigin

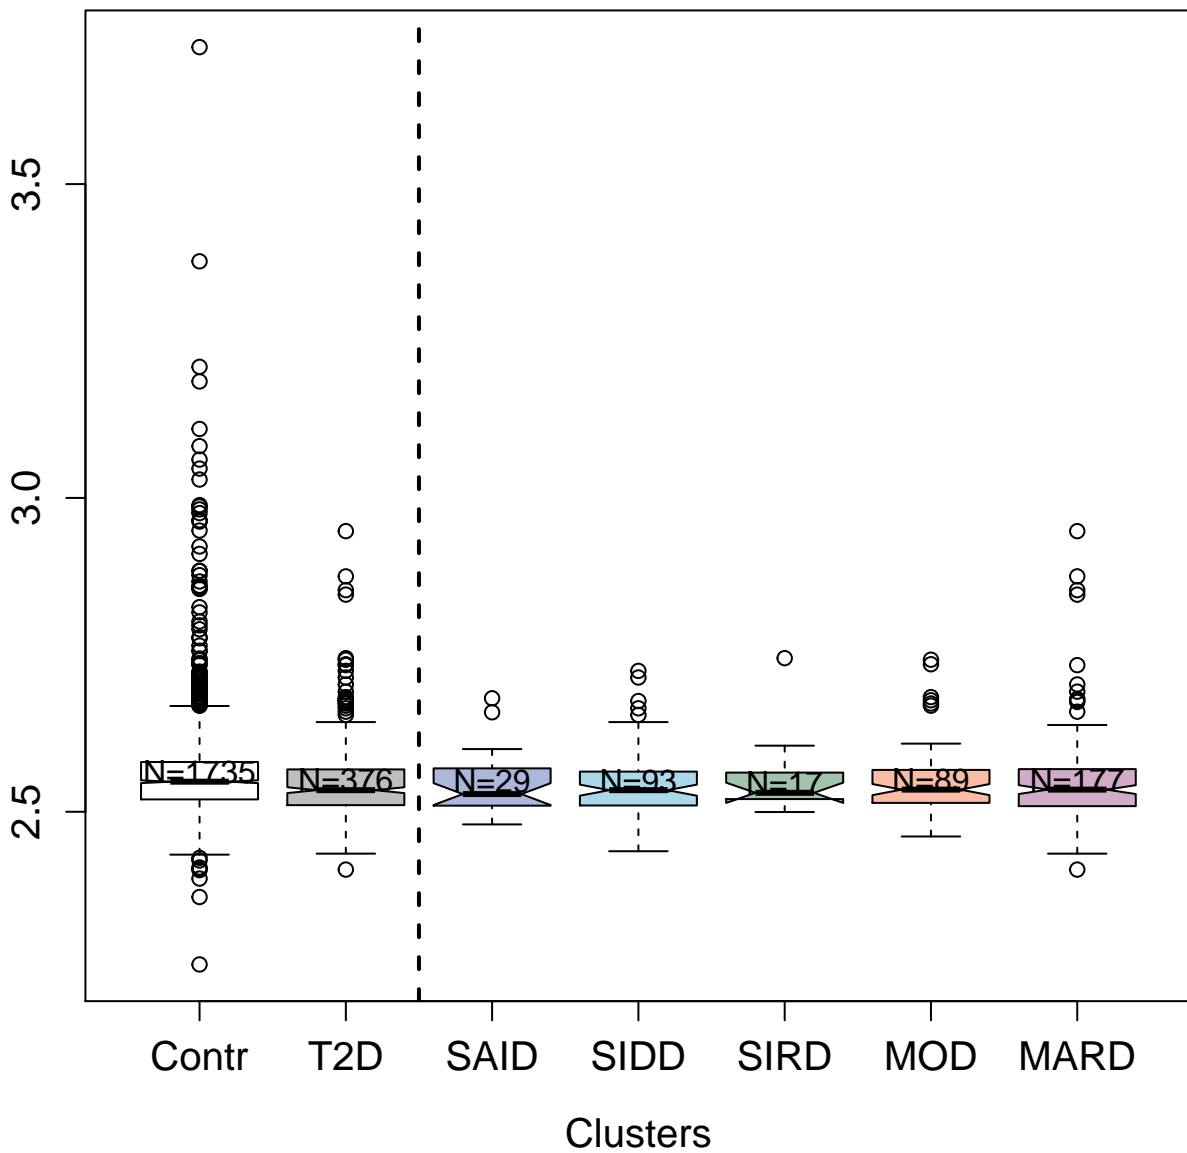

3310-62\_1 : Low affinity immunoglobulin gamma Fc  
region receptor II-b

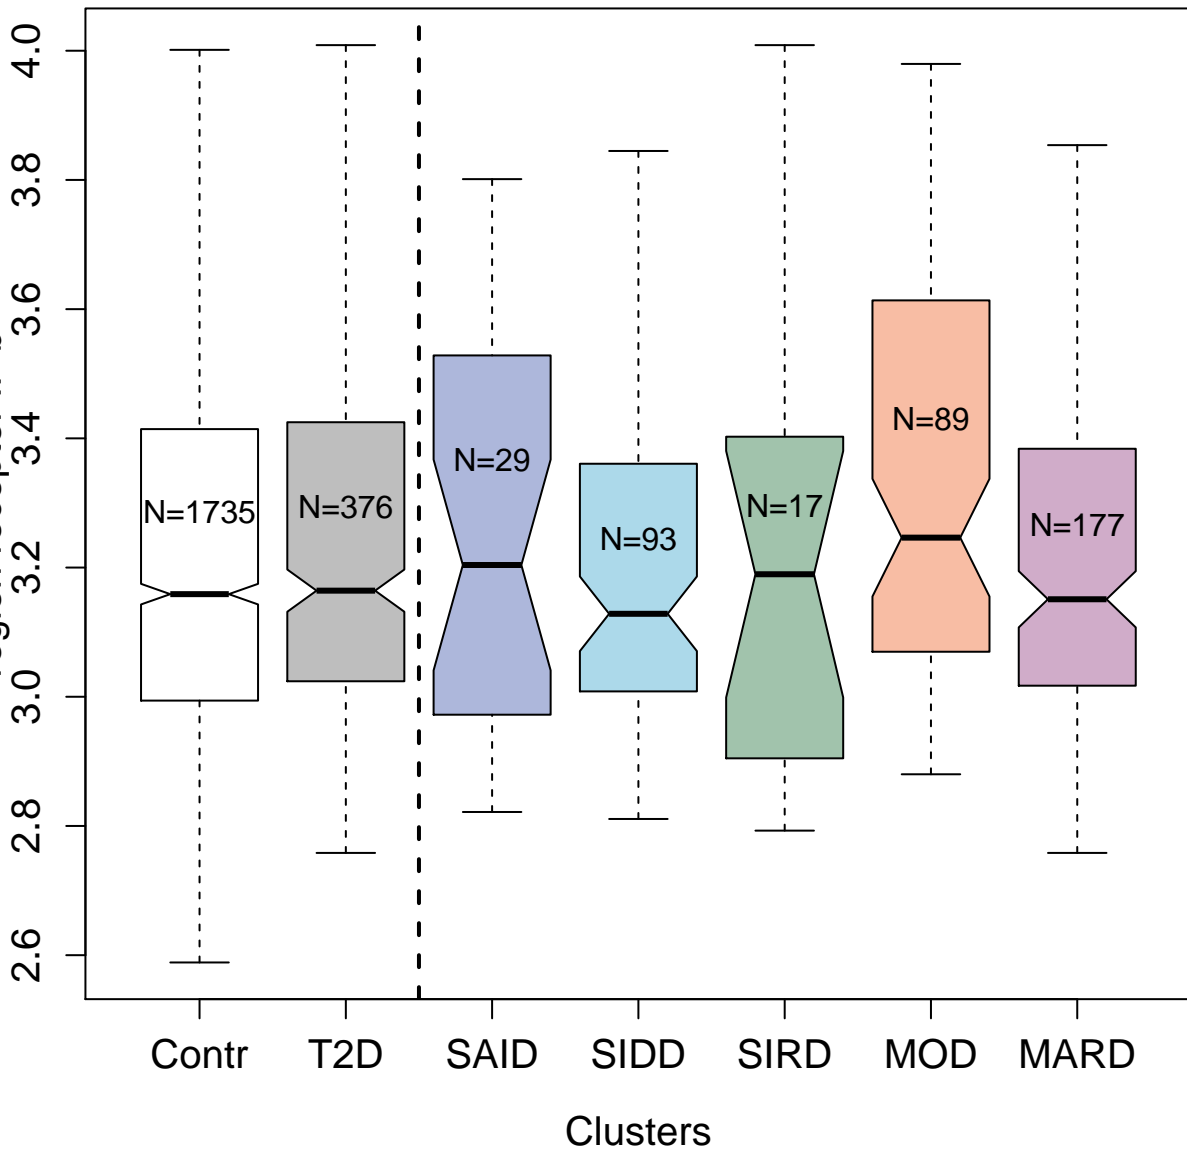

5201-50\_4 : High affinity cGMP-specific  
3':5'-cyclic phosphodiesterase 9A

2.5 3.0 3.5 4.0 4.5

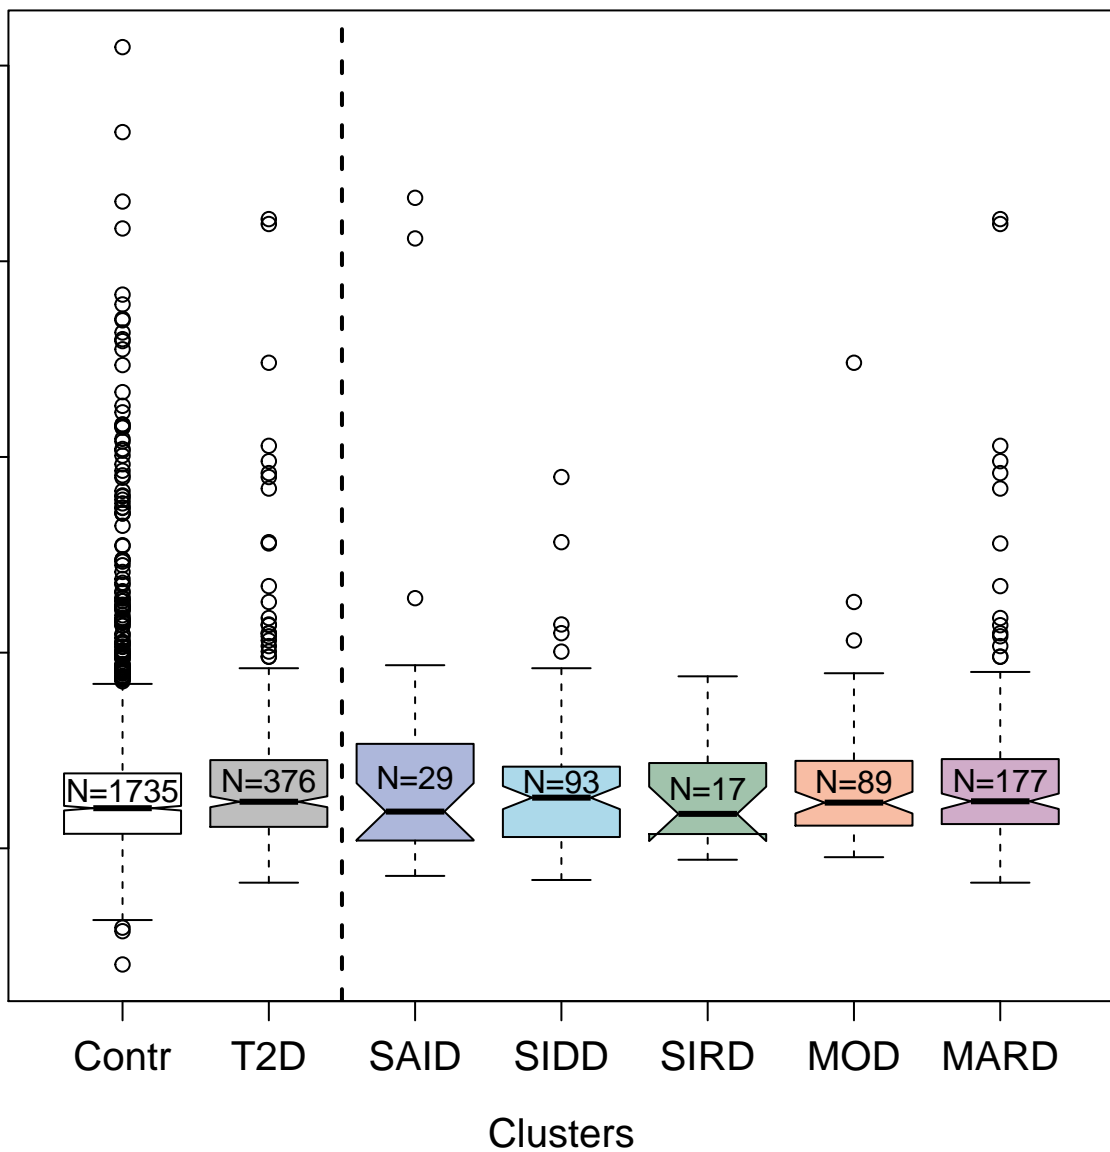

10366-11\_3 : Platelet-derived growth factor receptor alpha

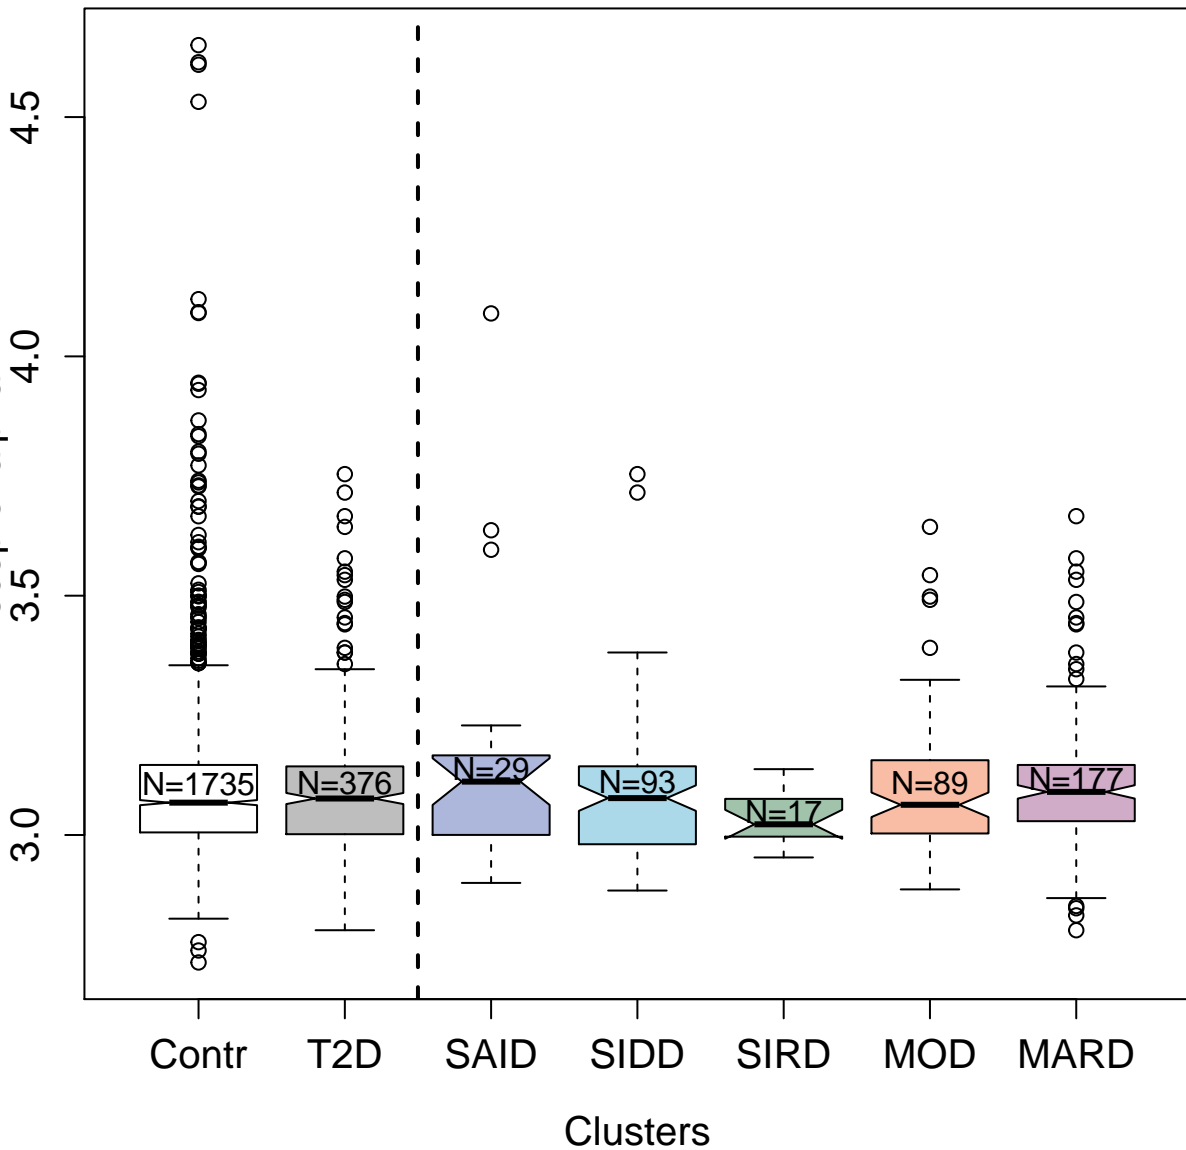

4130-71\_1 : Fibroblast growth factor 6

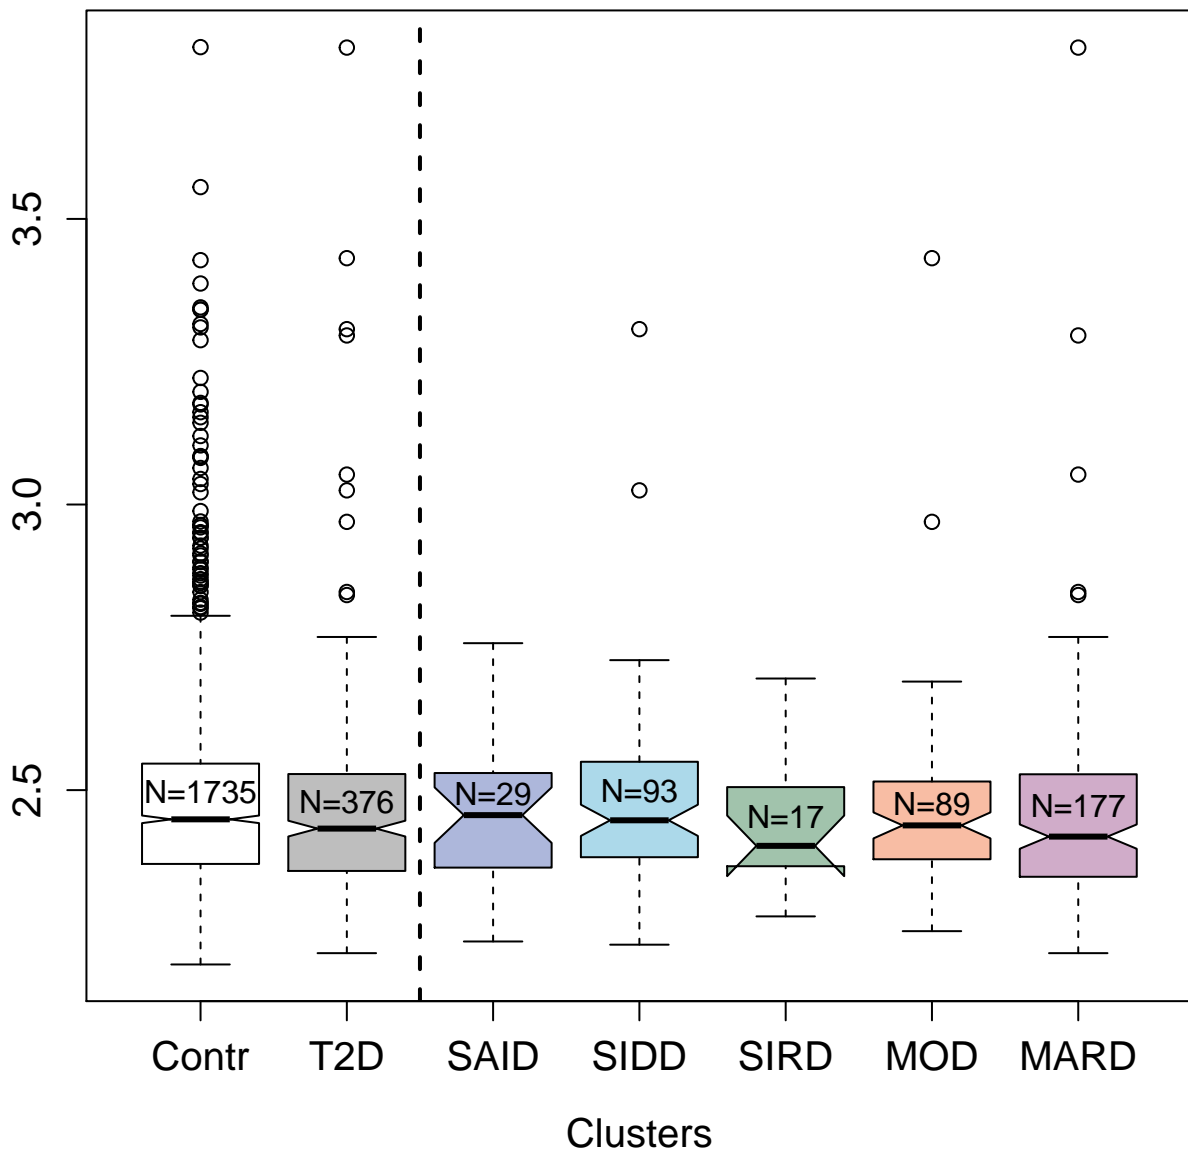

2578-67\_2 : C-C motif chemokine 2

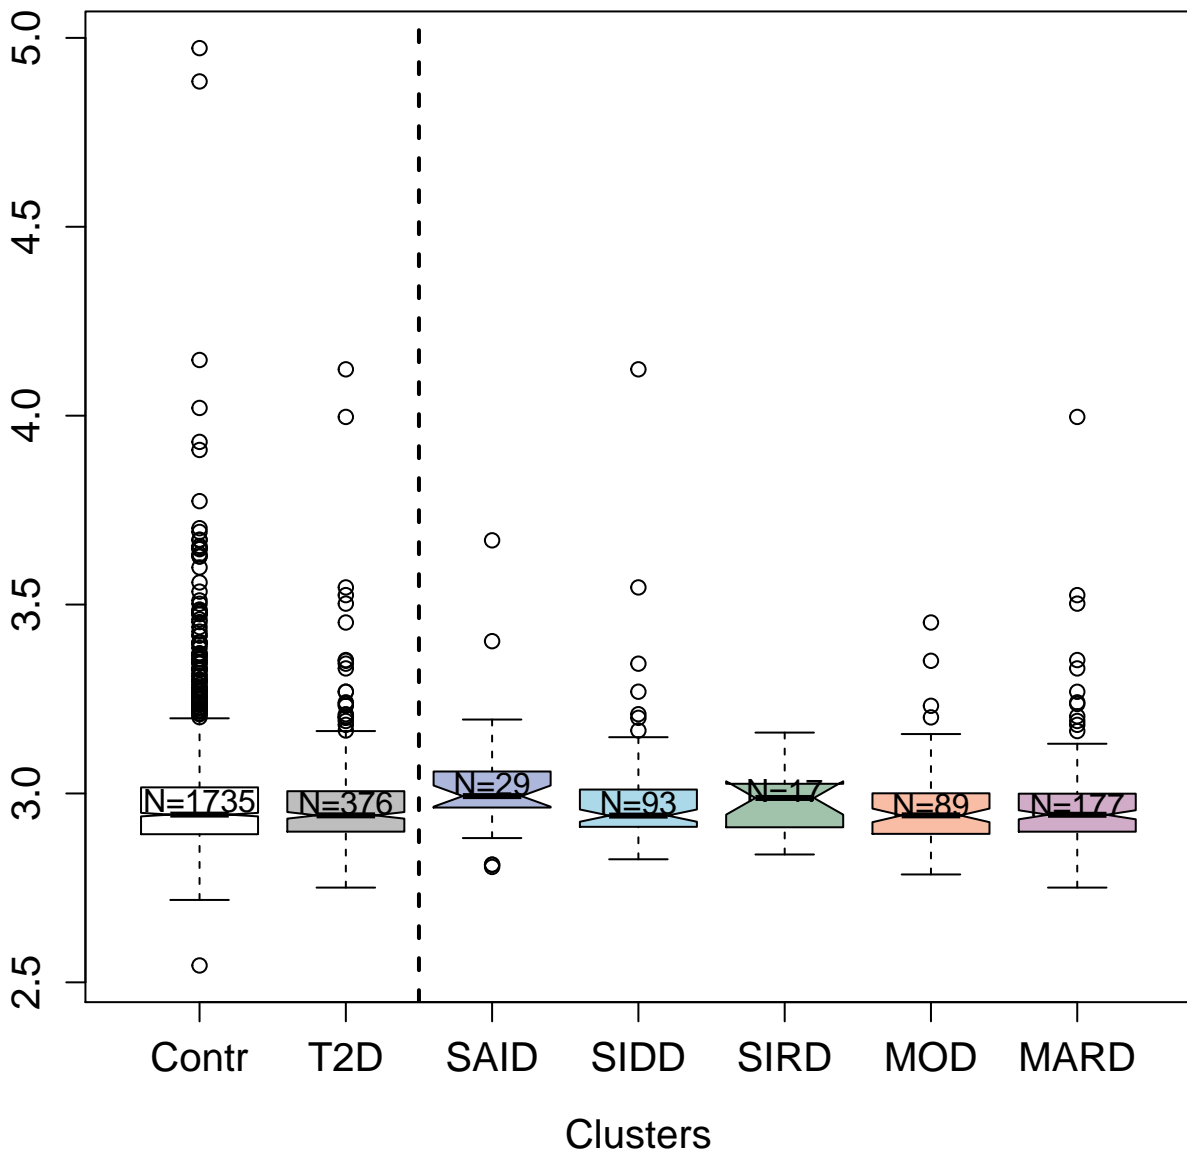

2597-8\_3 : Vascular endothelial growth factor A

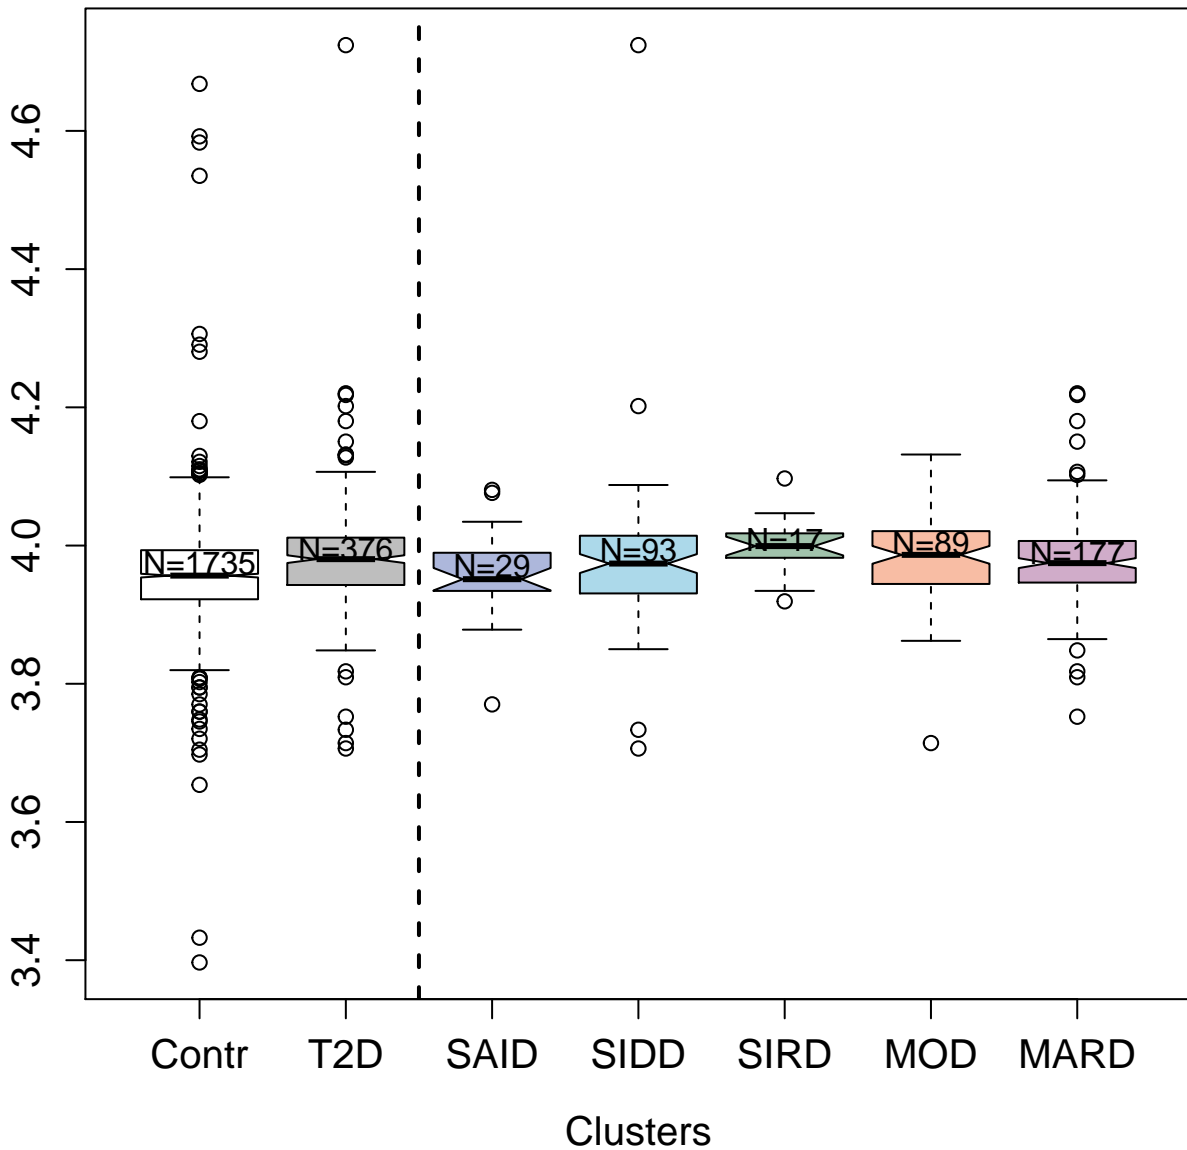



3486-58\_2 : Fibroblast growth factor 1

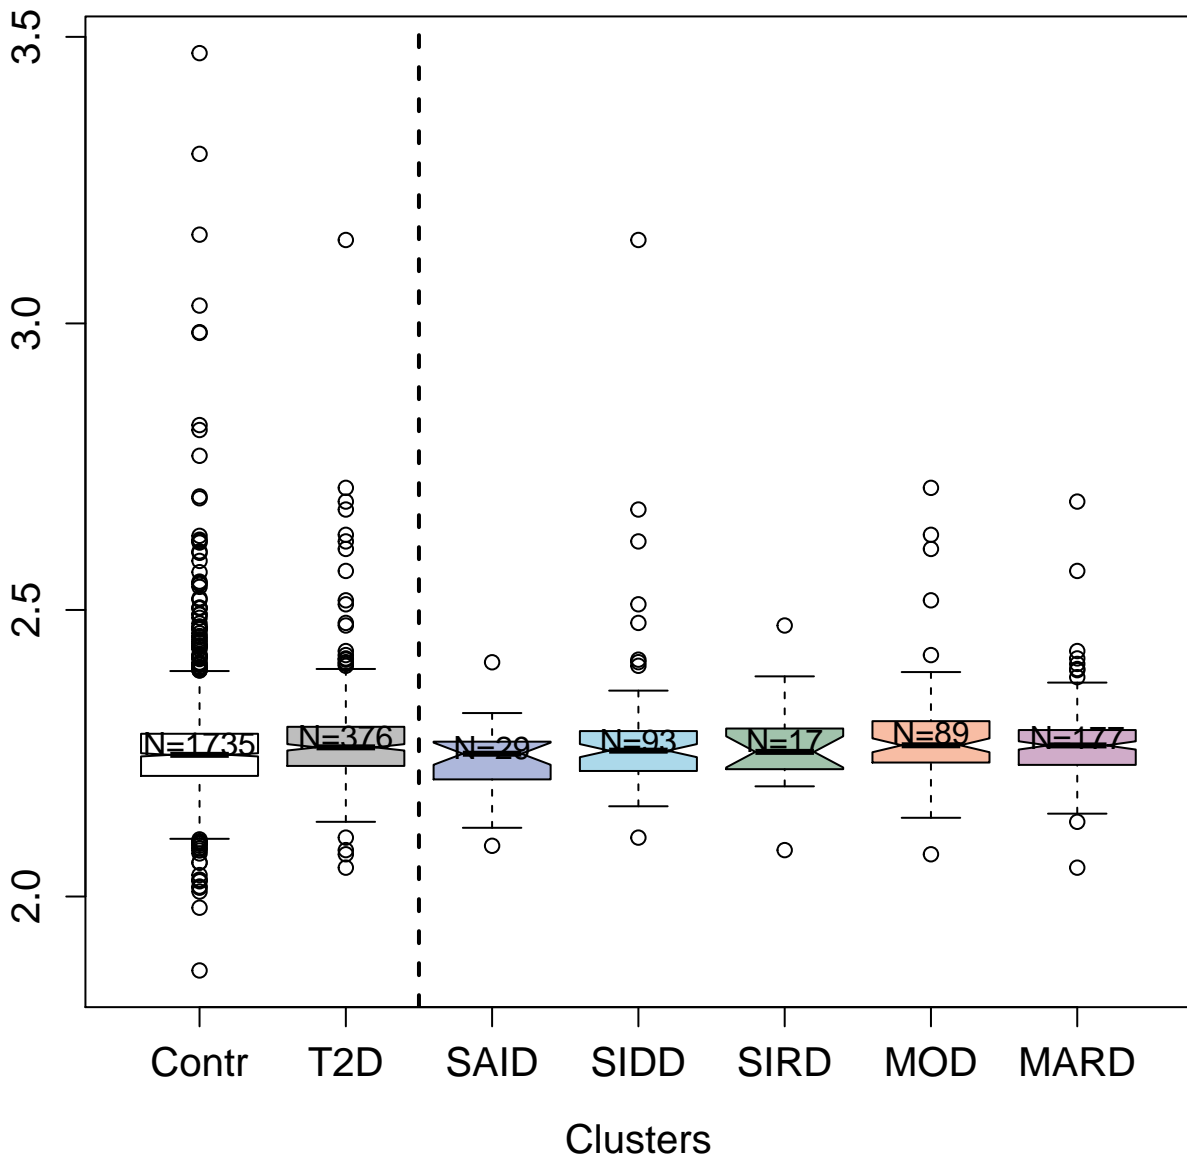

3061-61\_2 : Cathepsin B

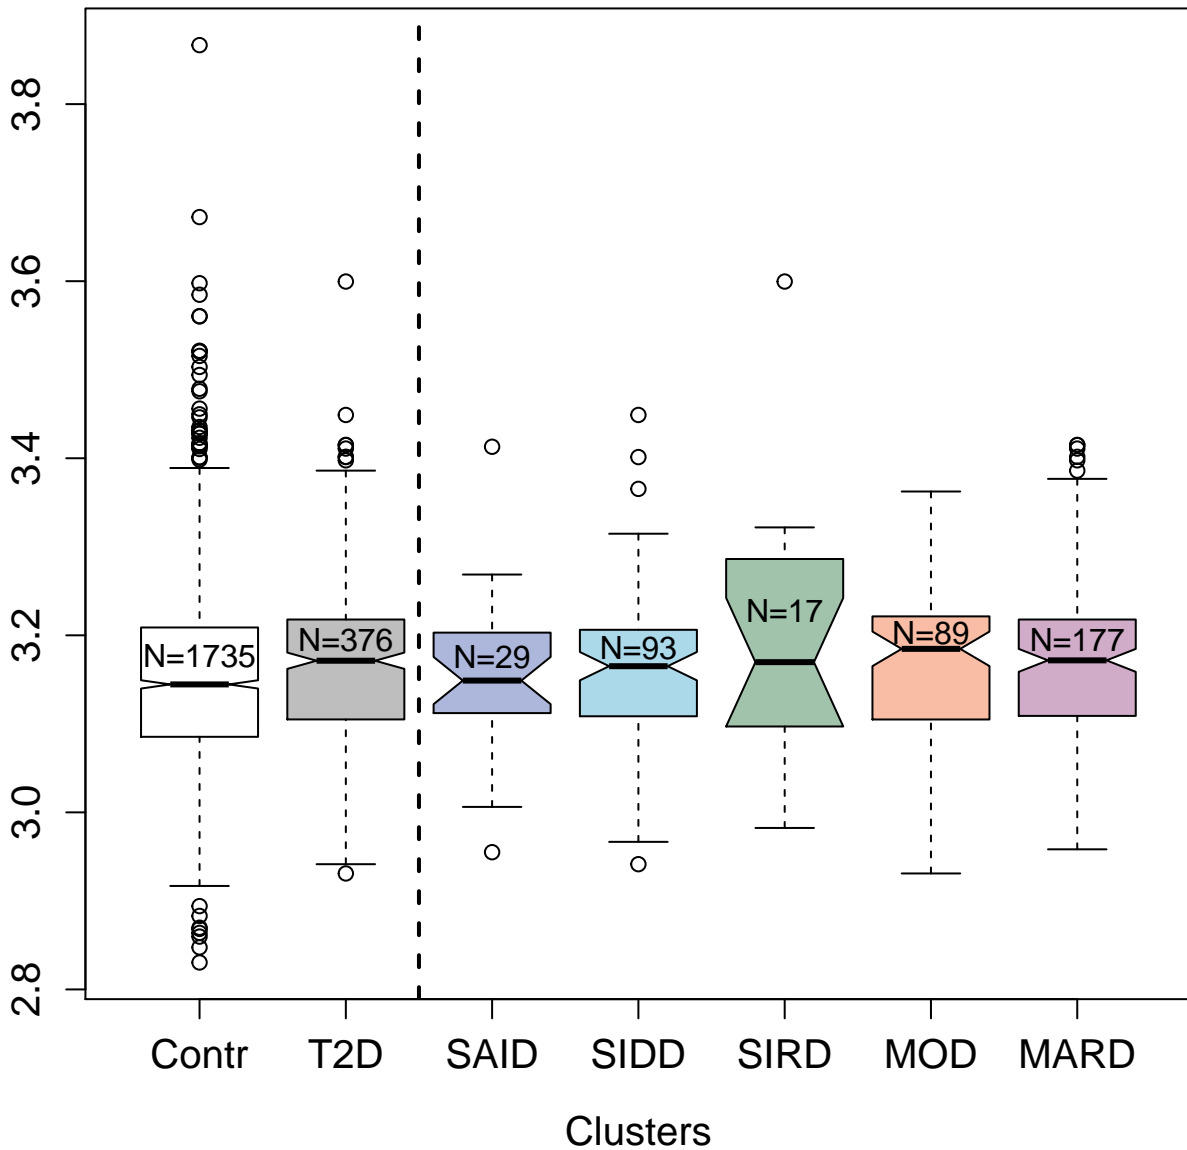

5116-62\_2 : Roundabout homolog 2

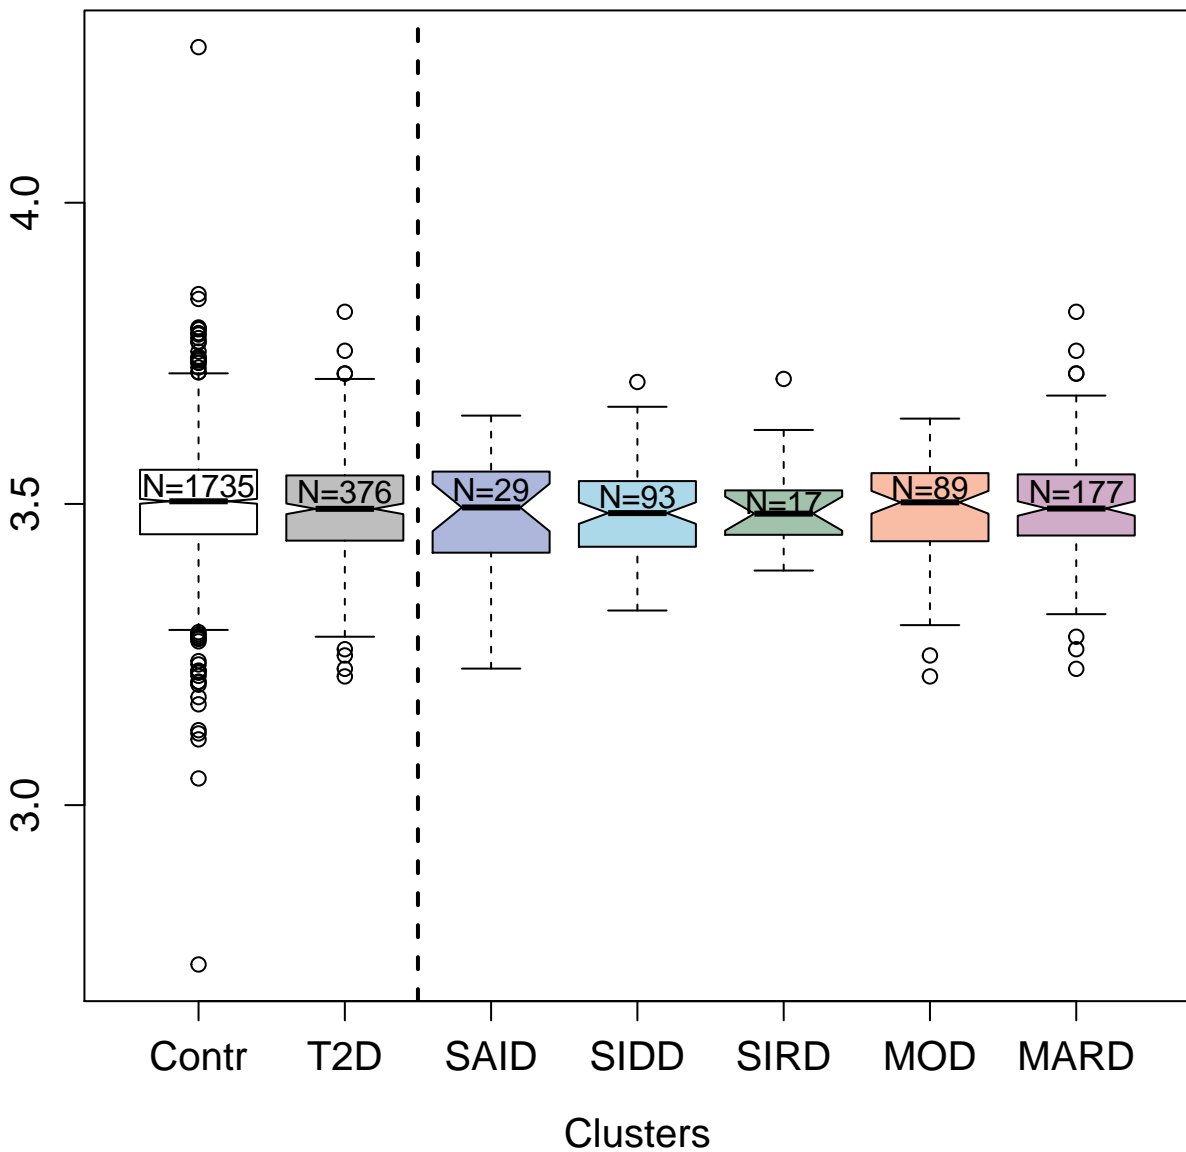

4396-54\_1 : Interferon lambda-1

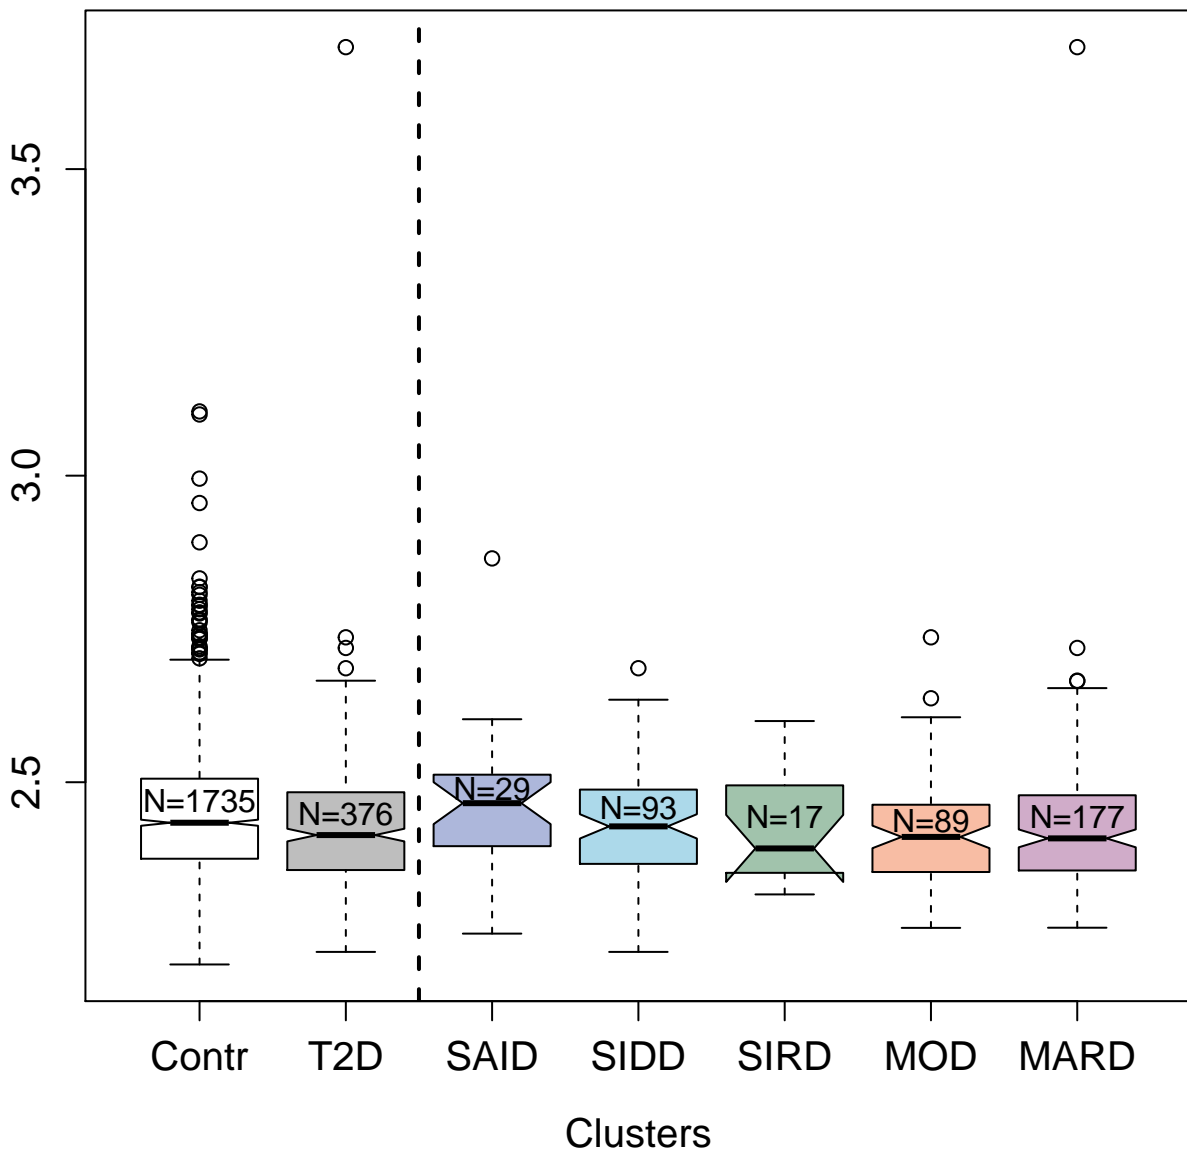

3440-7\_2 : Granzyme A

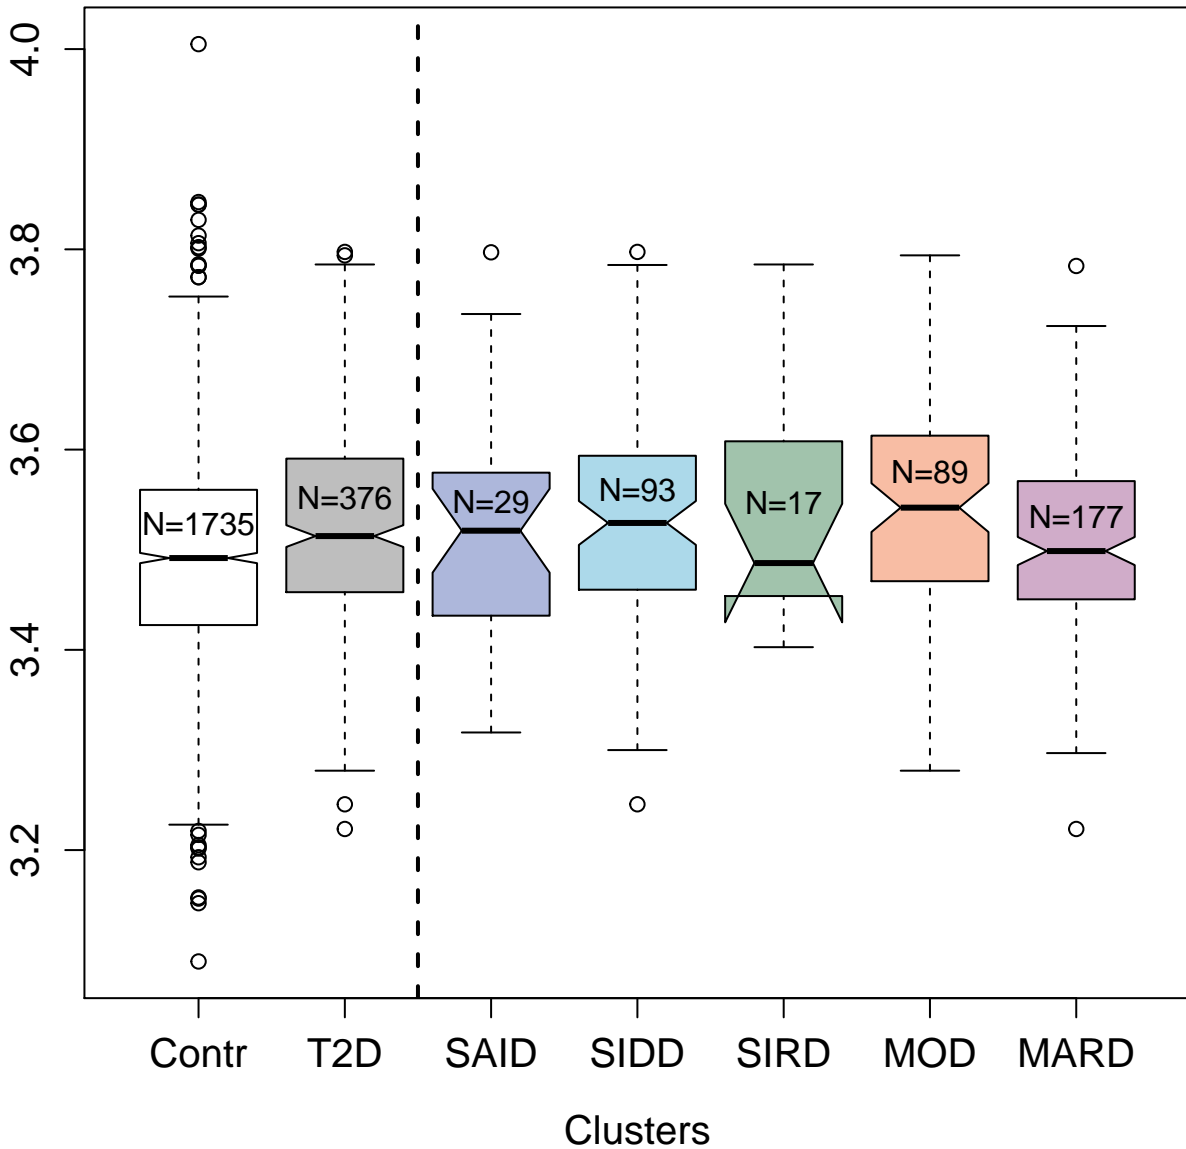



3554-24\_1 : Adiponectin

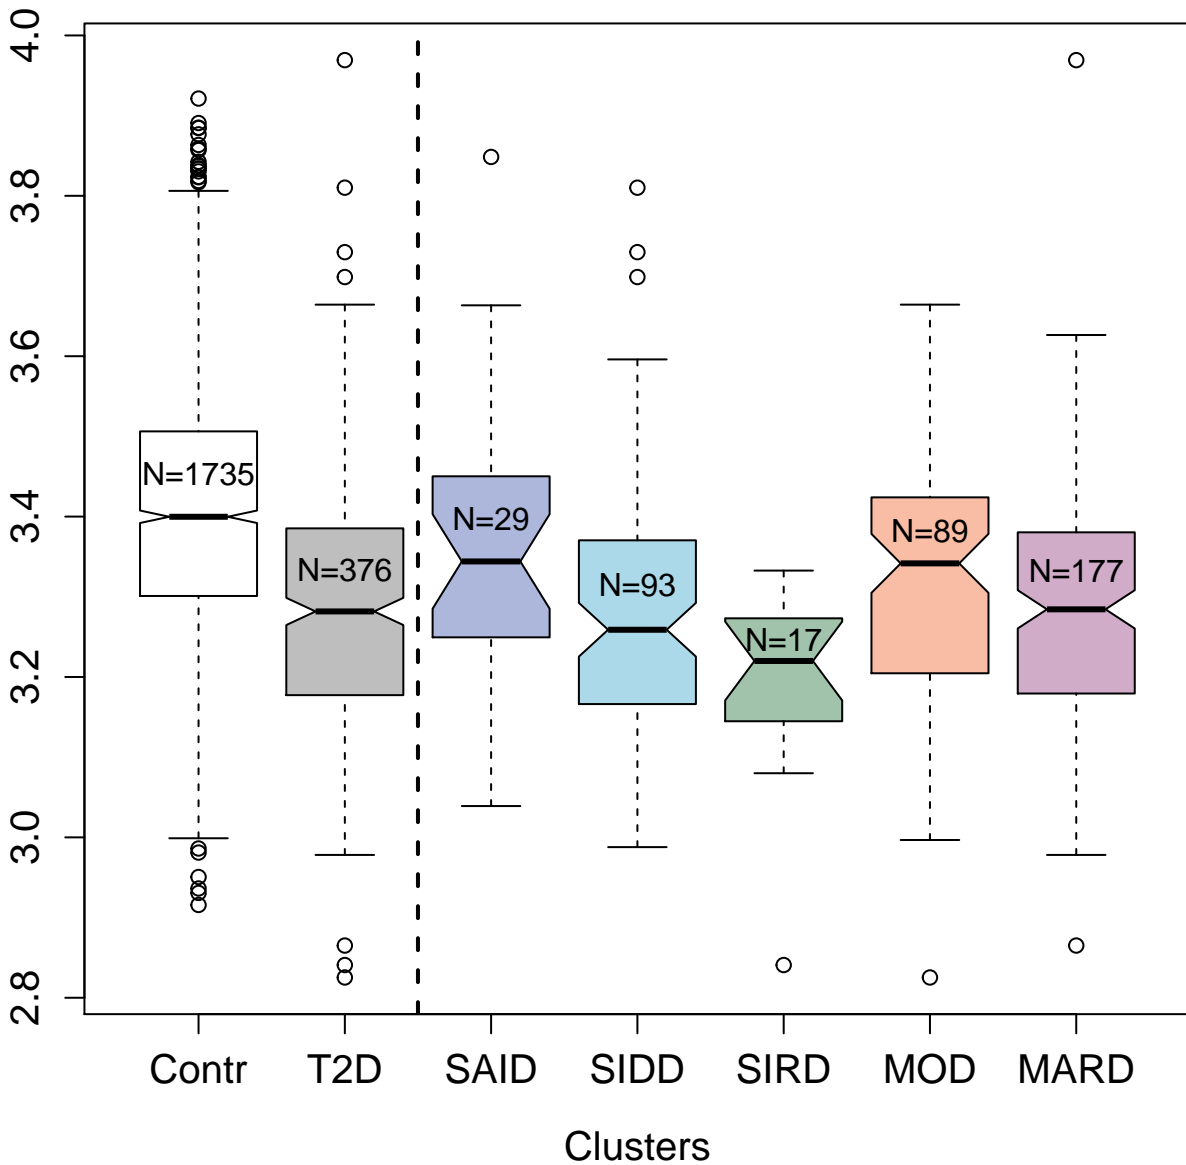

5033-27\_1 : Tropomyosin alpha-1 chain

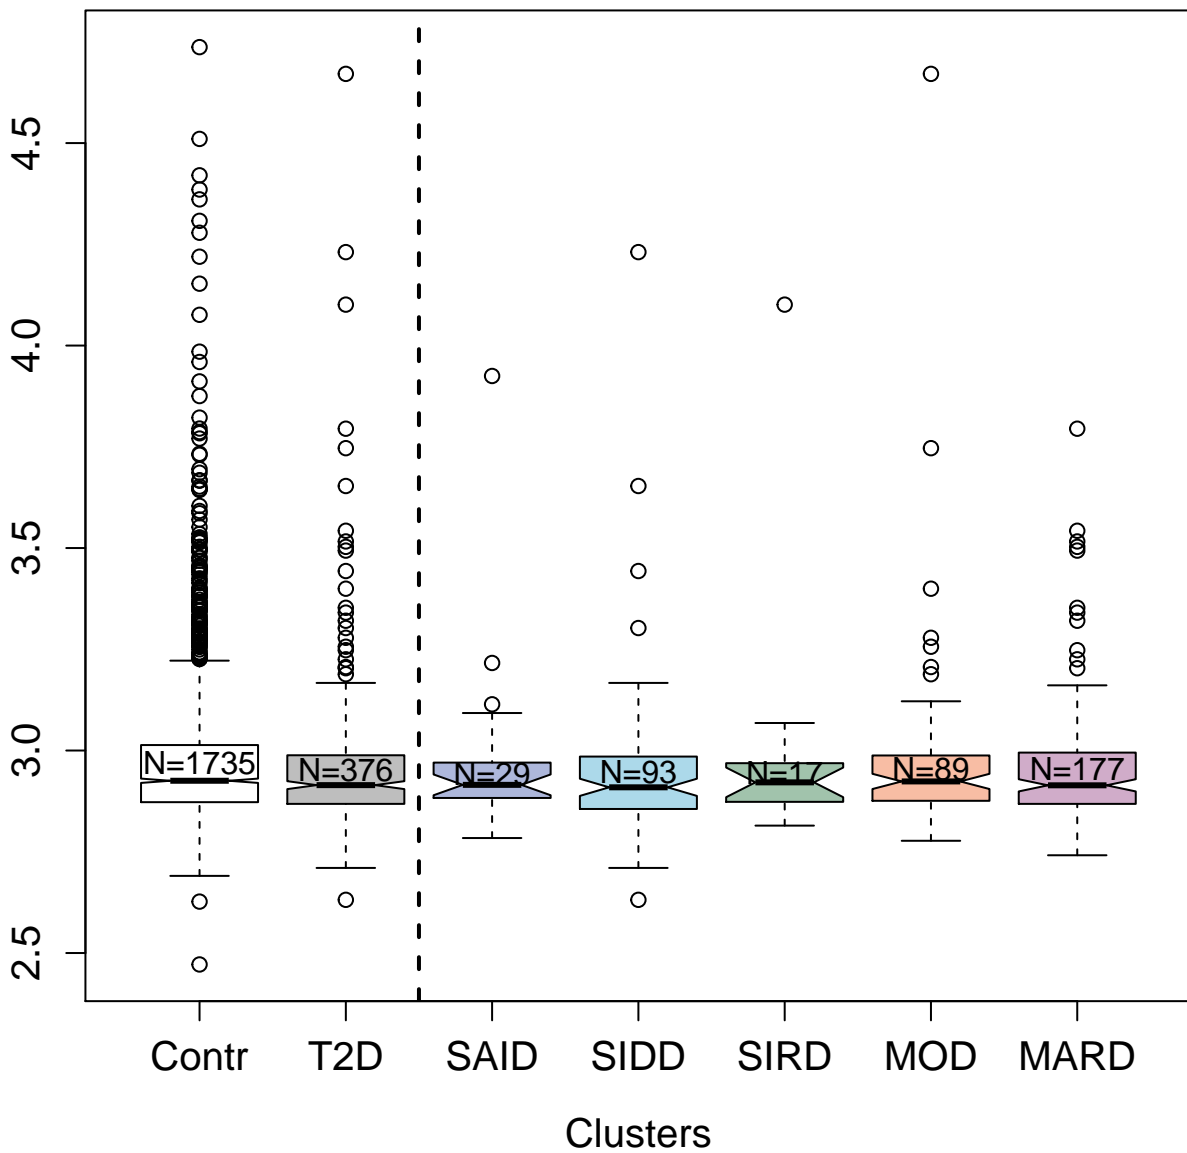



8464-31\_3 : R-spondin-4

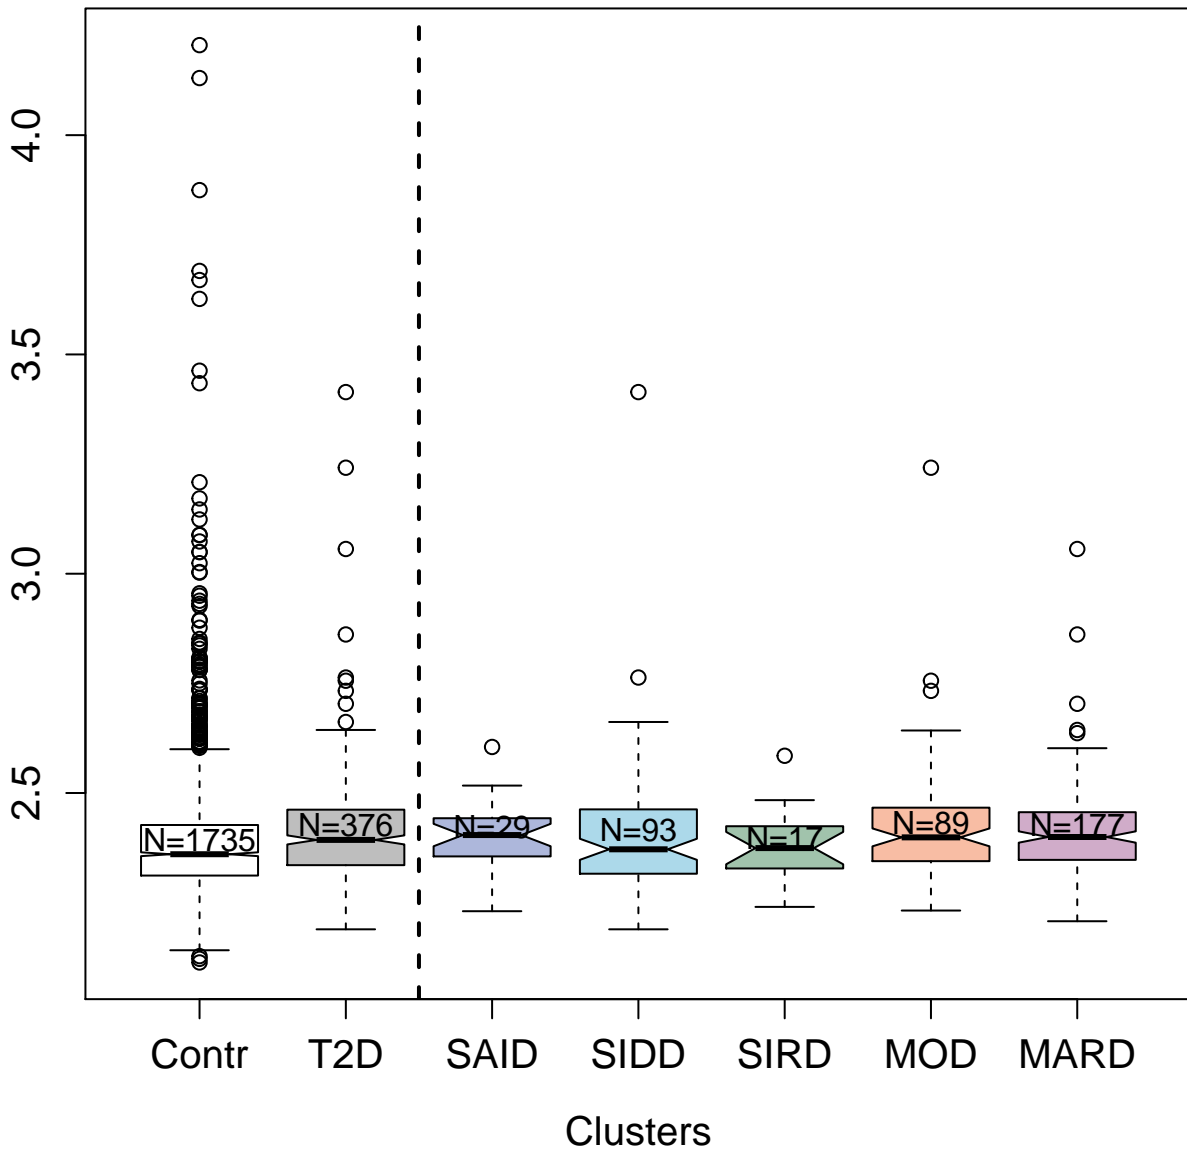

3321-2\_2 : Interleukin-24

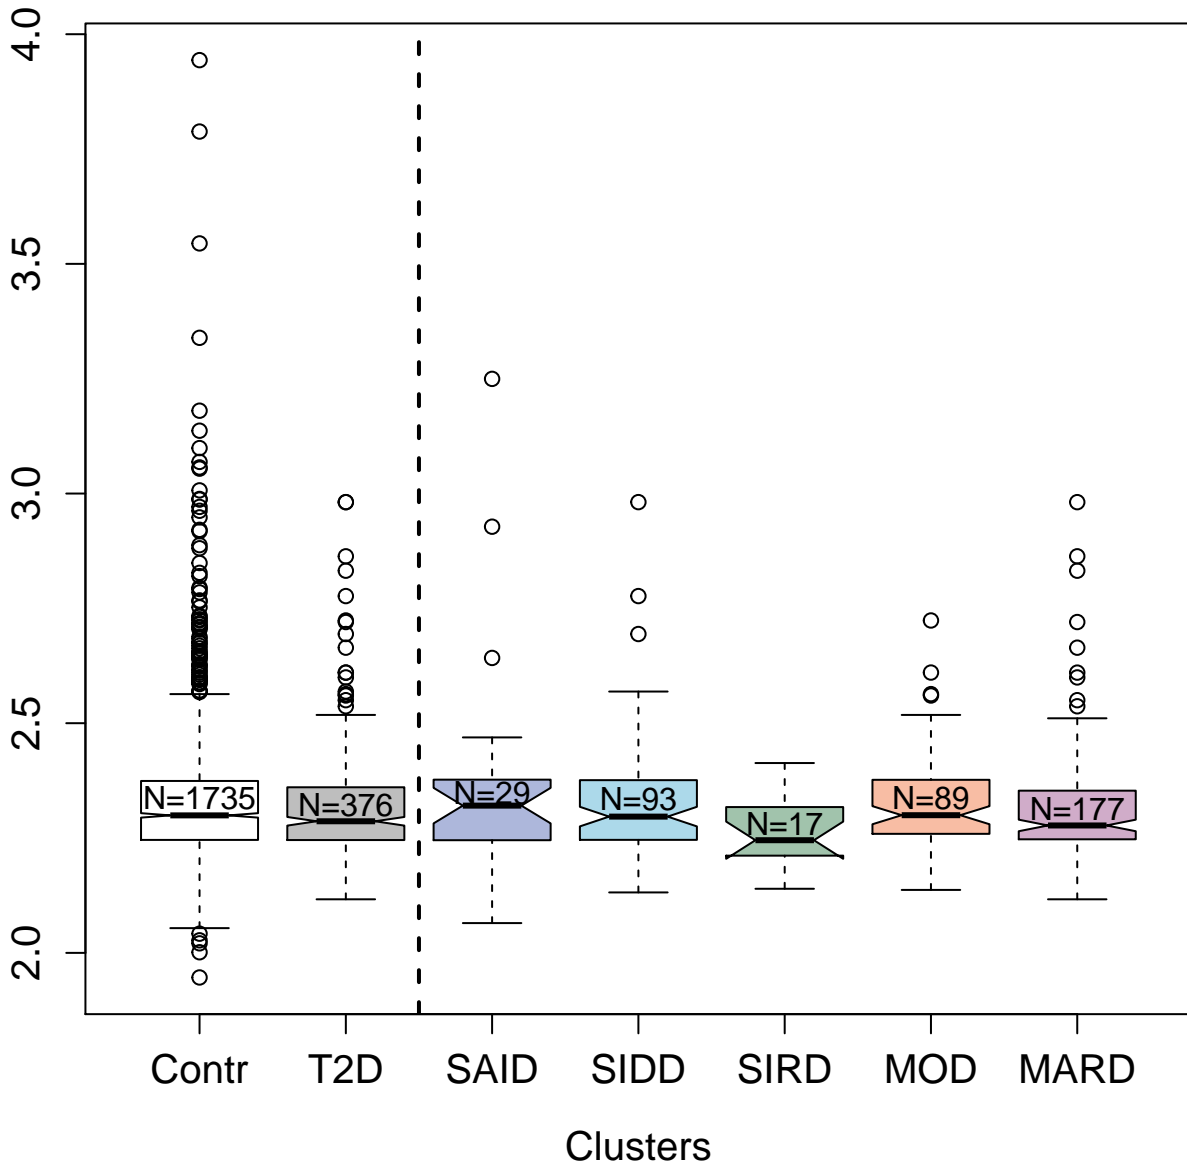

14144-3\_3 : Histone H2A type 3

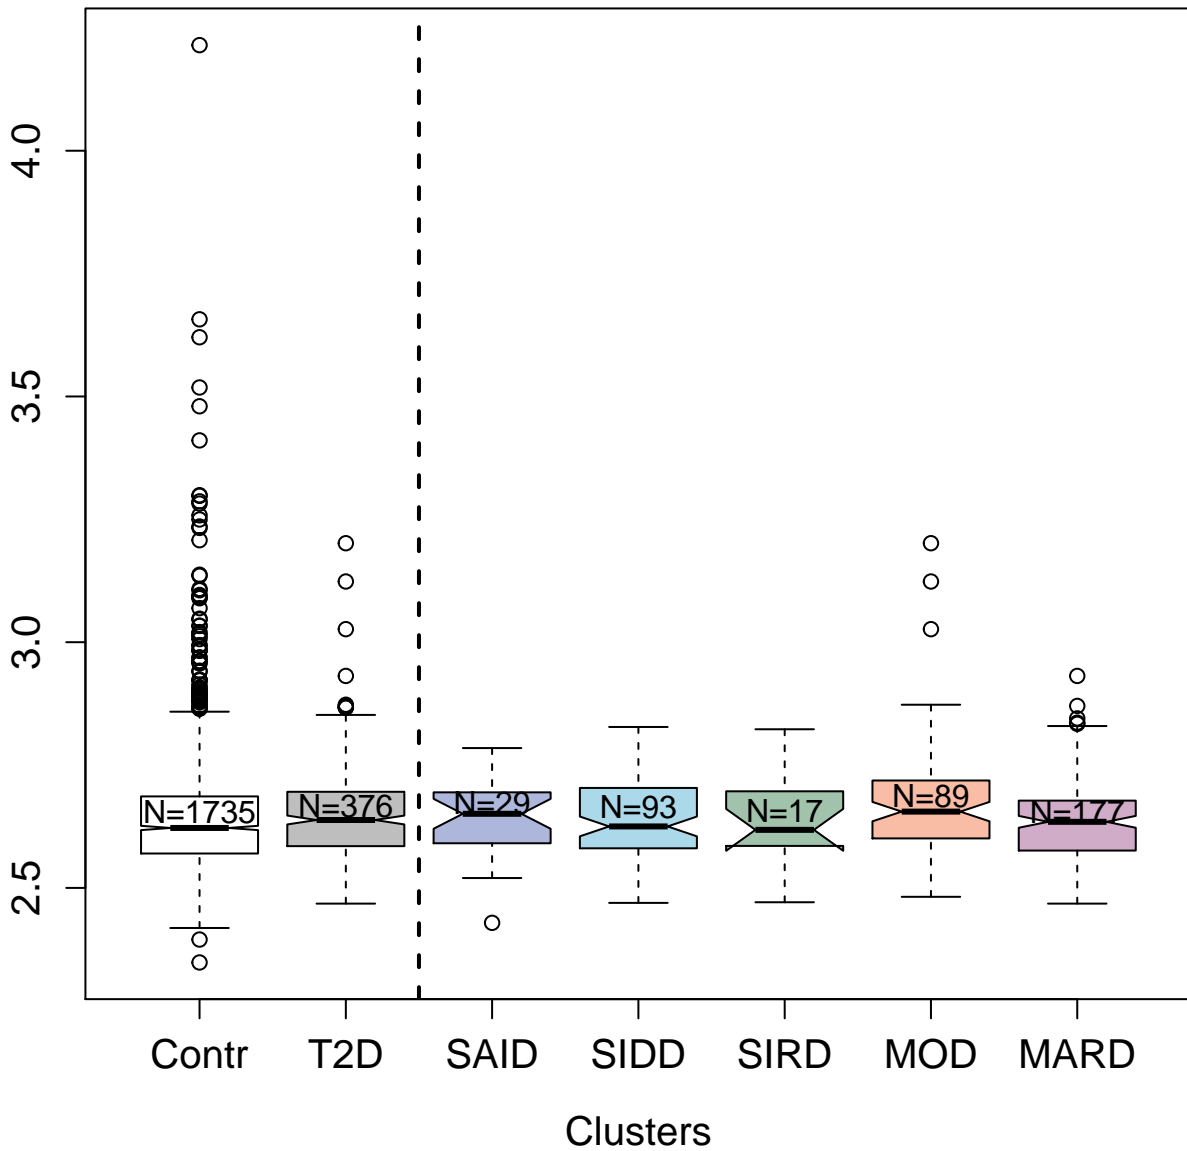

4534-10\_2 : Brain-specific serine protease 4

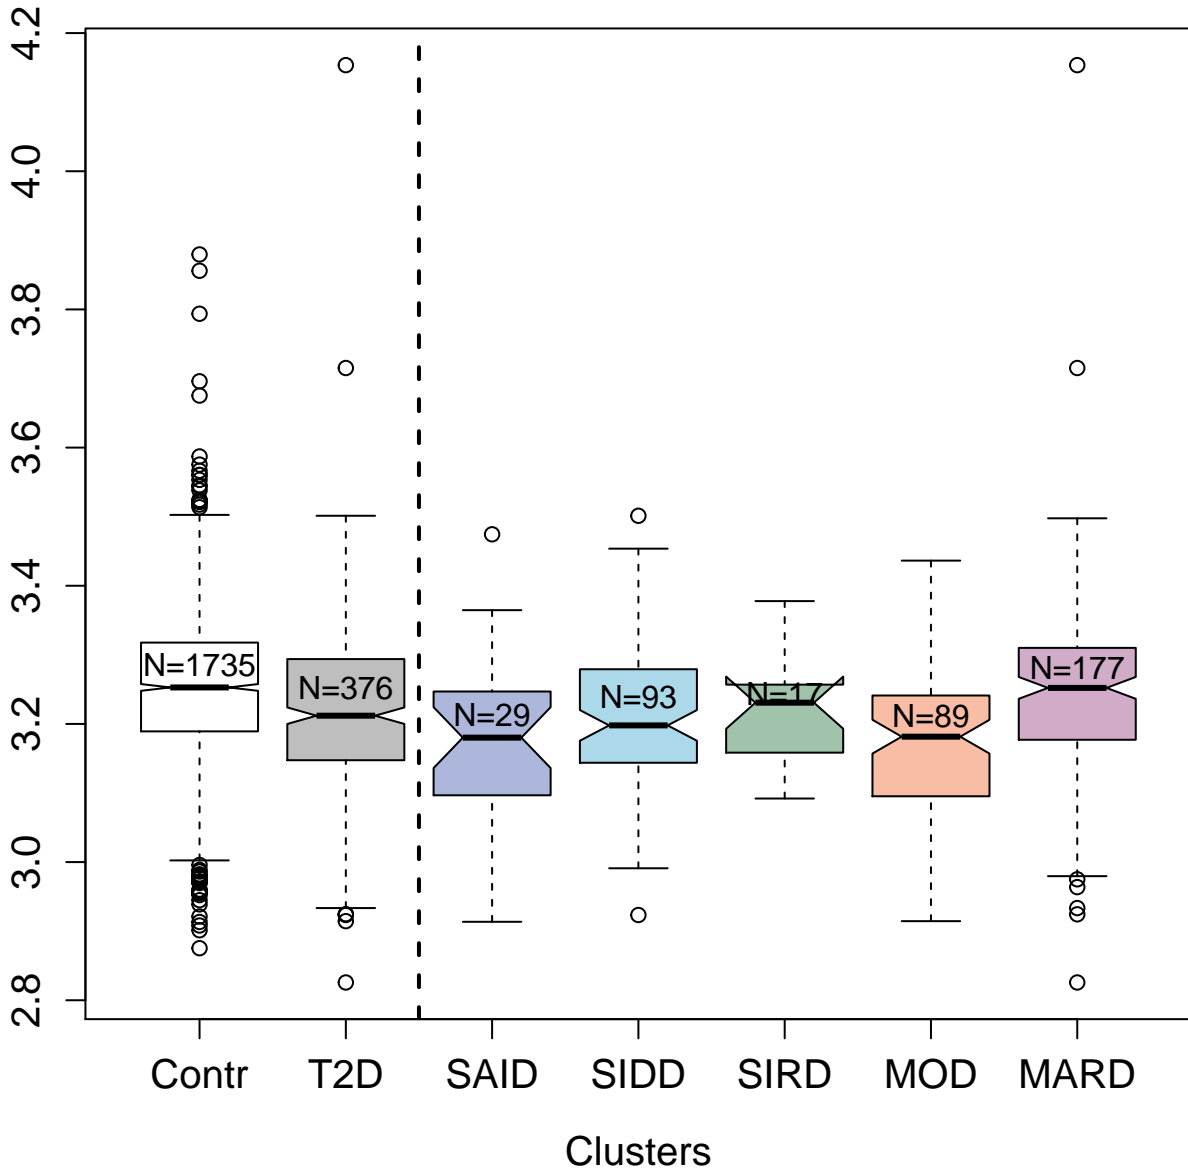

3423-59\_2 : Chymase

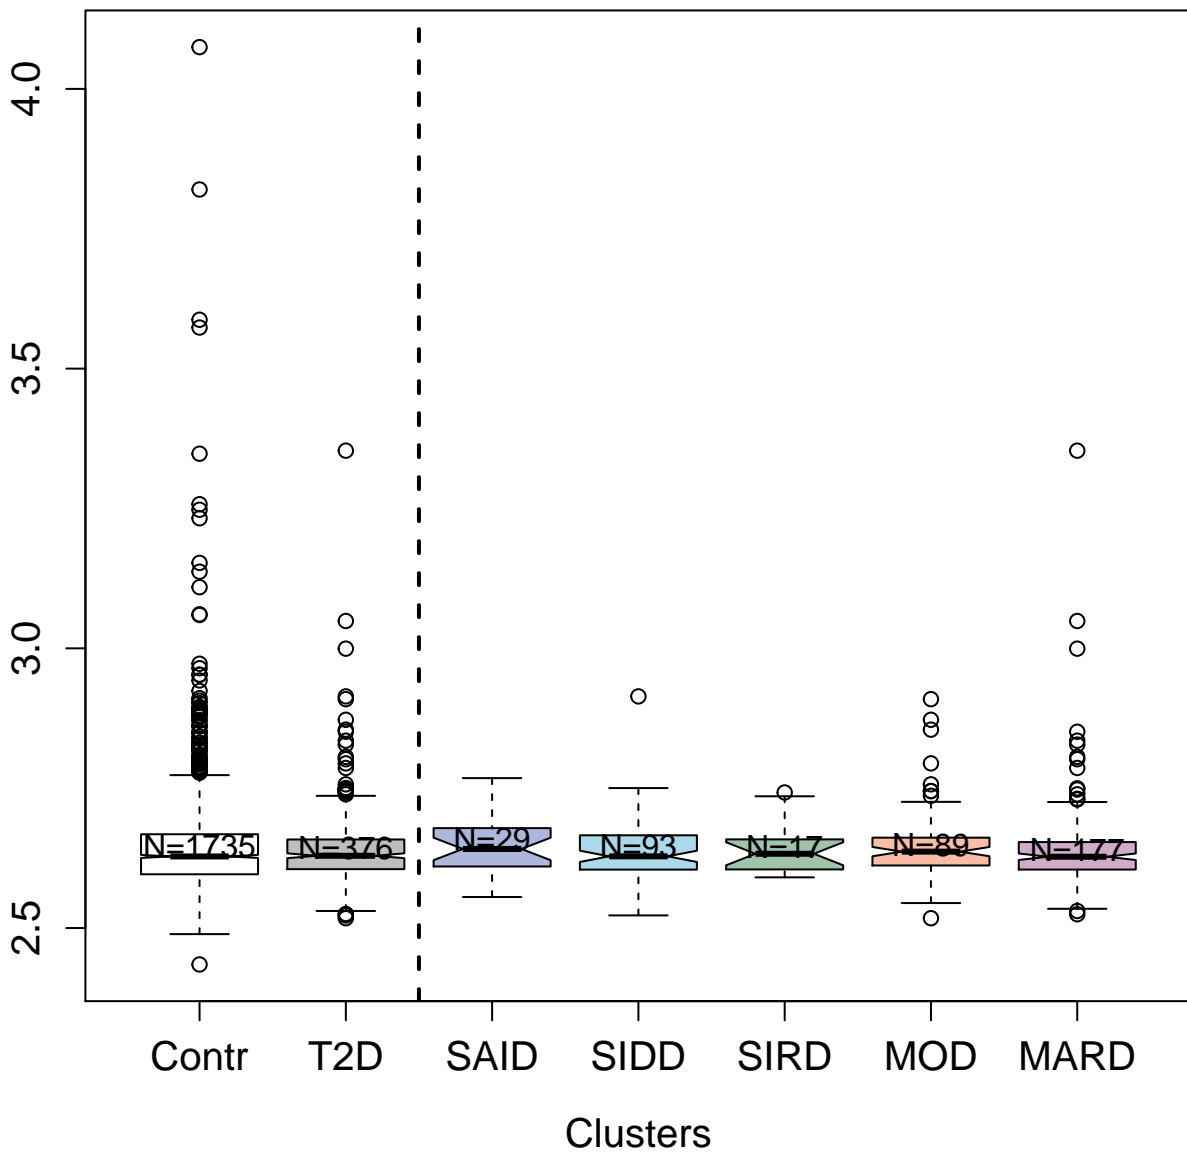

5094-62\_3 : Junctional adhesion molecule-like

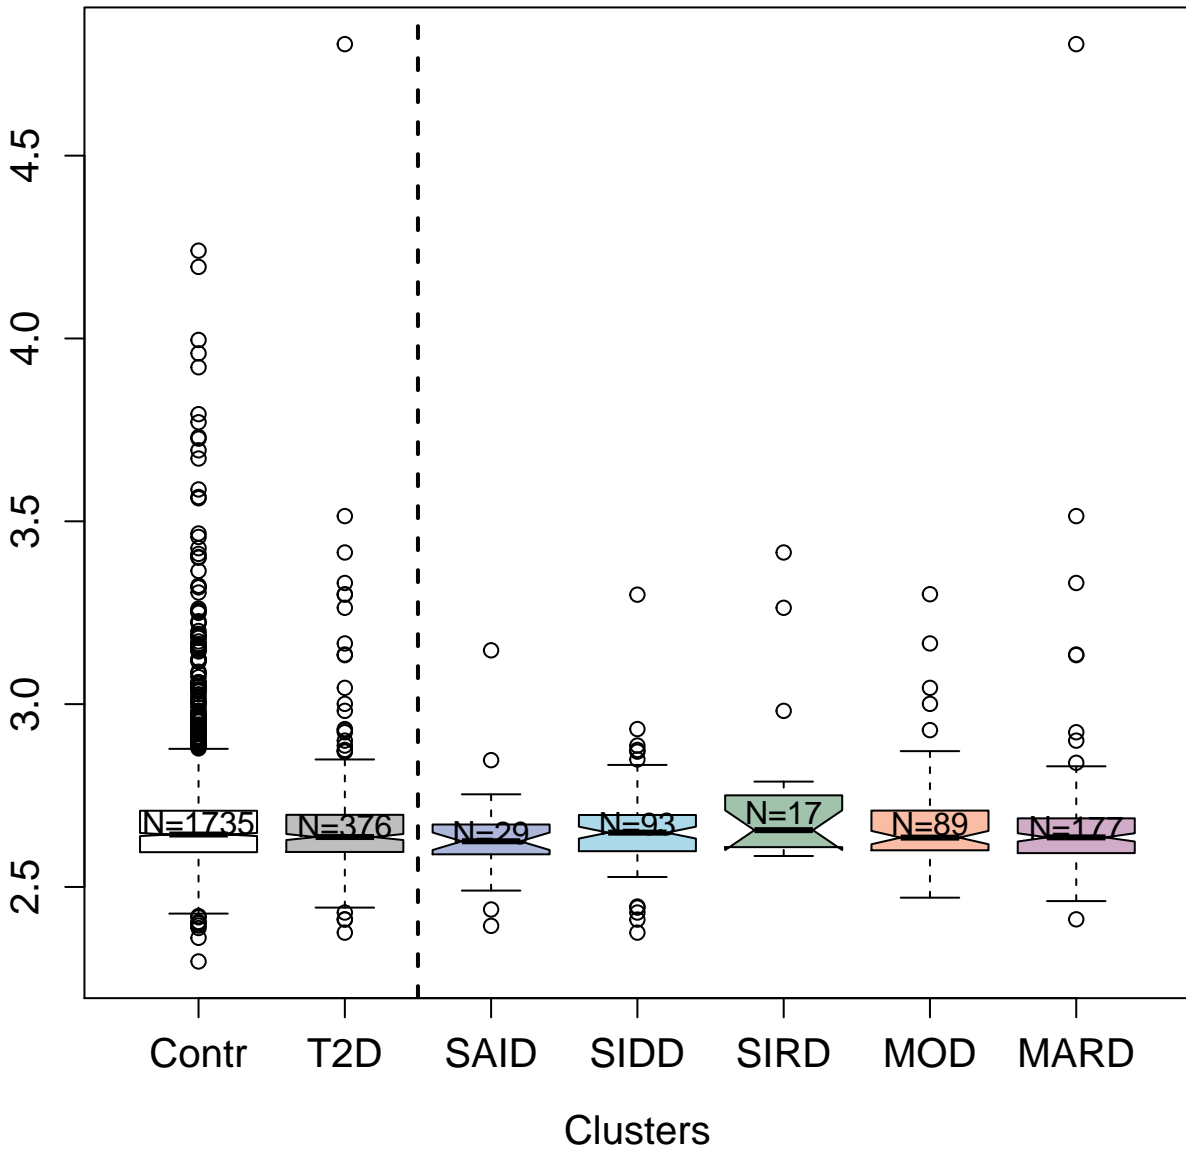

2839-2\_1 : Tumor necrosis factor ligand superfamily member 4

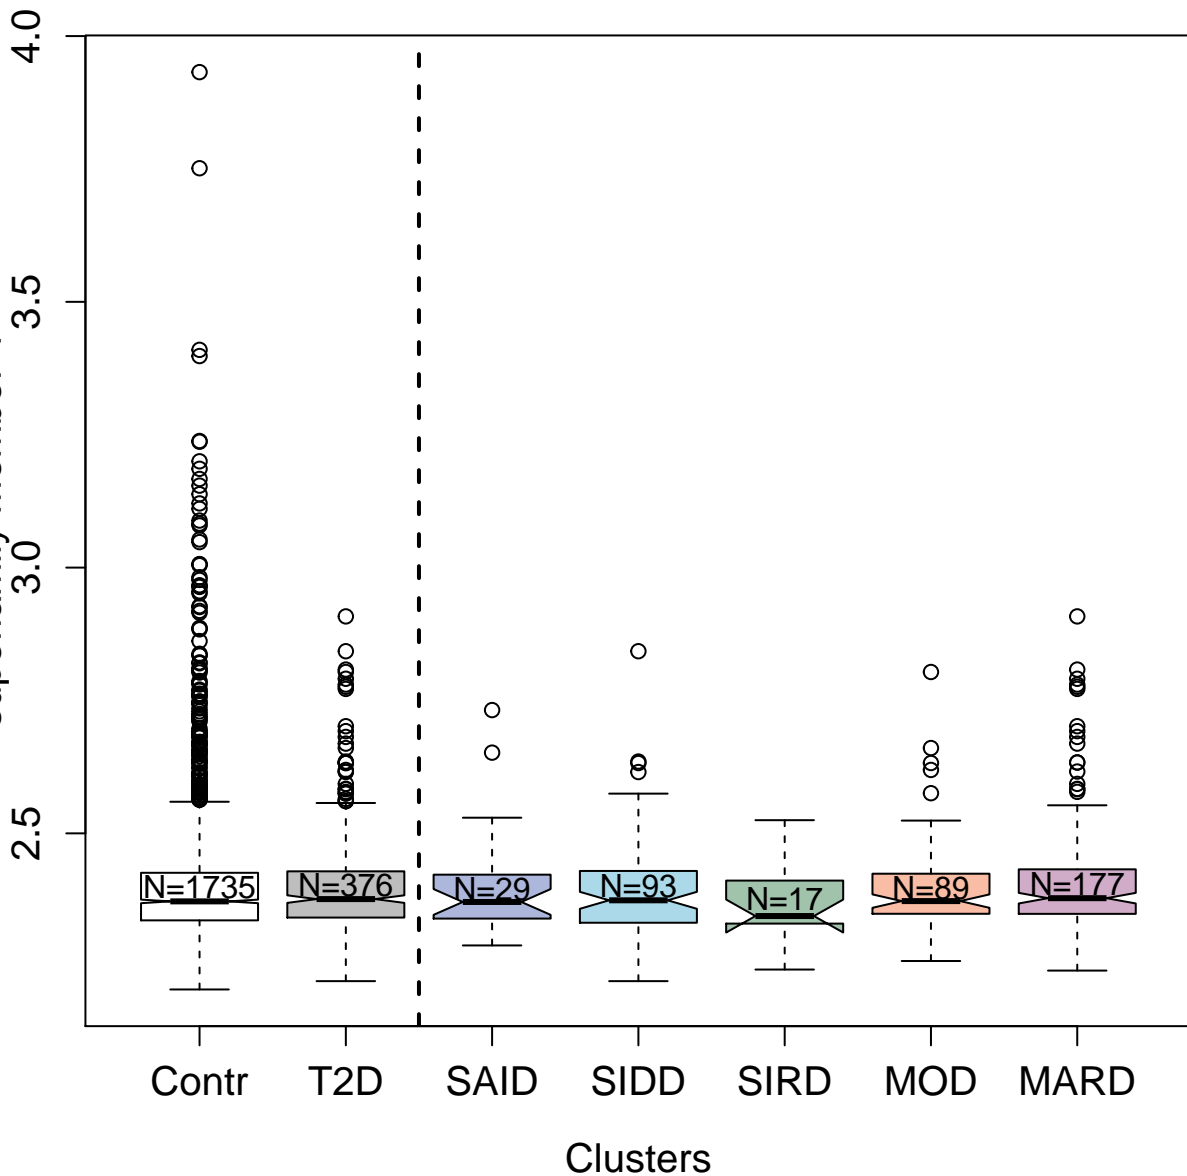

2775-54\_2 : Interleukin-17F

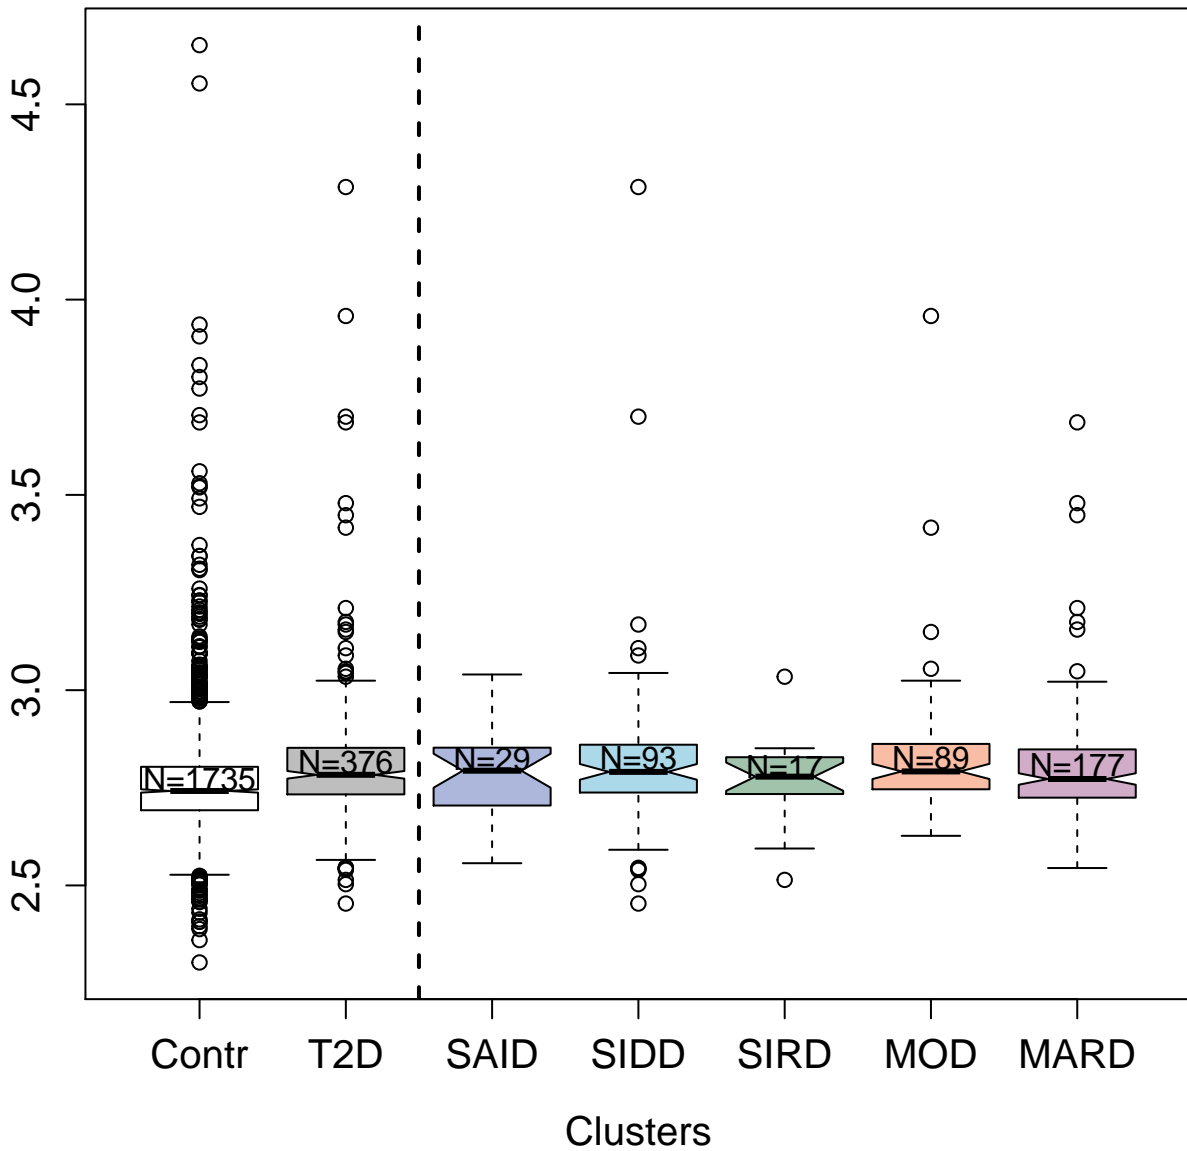



5097-14\_3 : Killer cell immunoglobulin-like receptor 3DS1

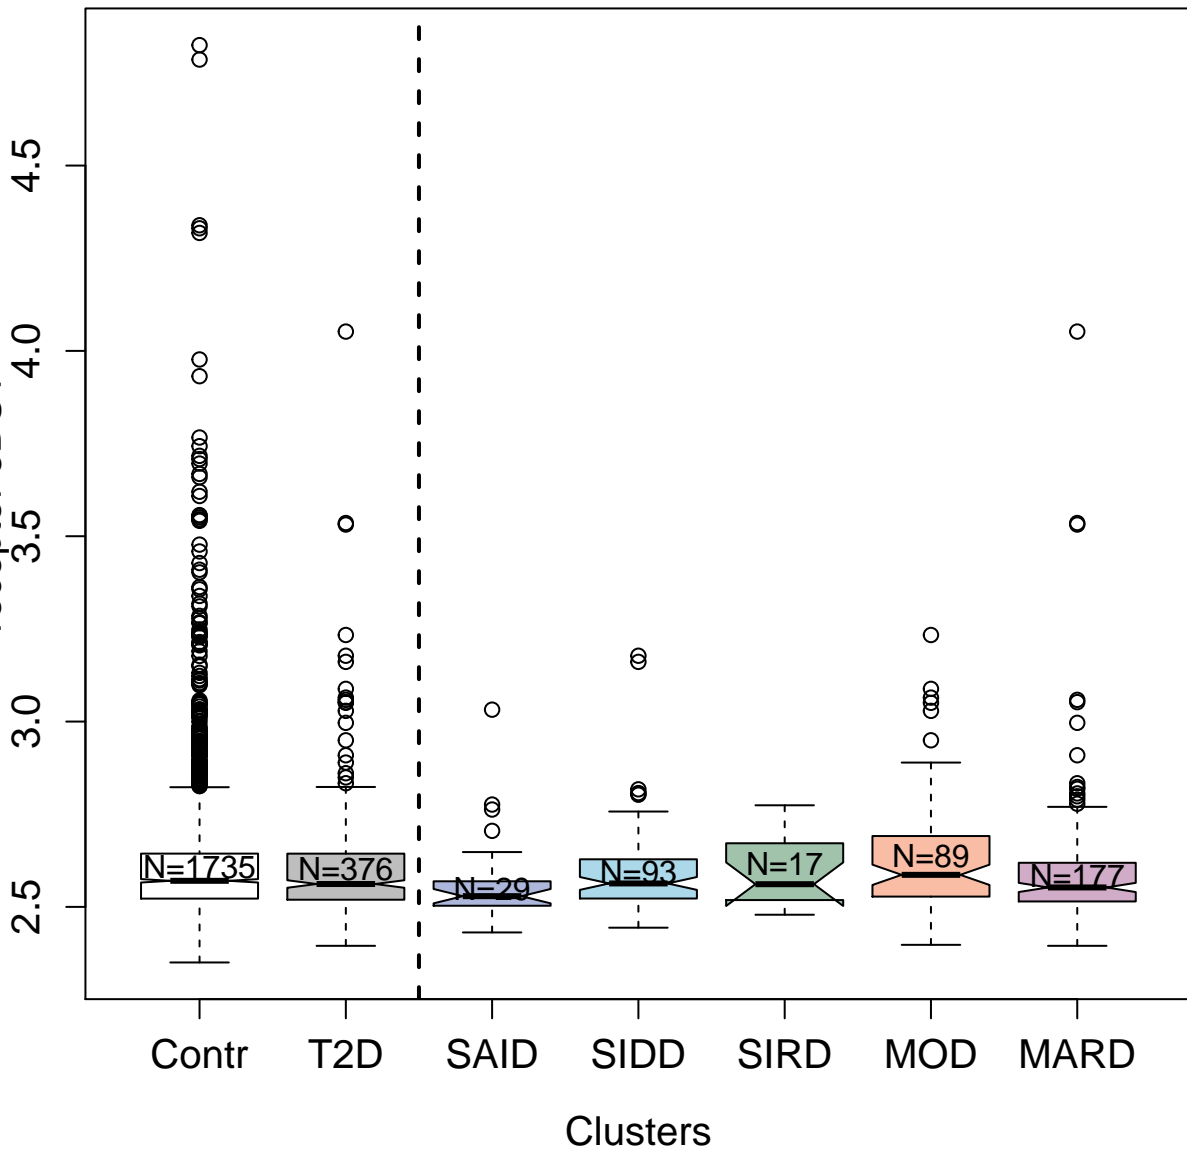

4184-43\_3 : Eukaryotic translation initiation  
factor 4E-binding protein 2

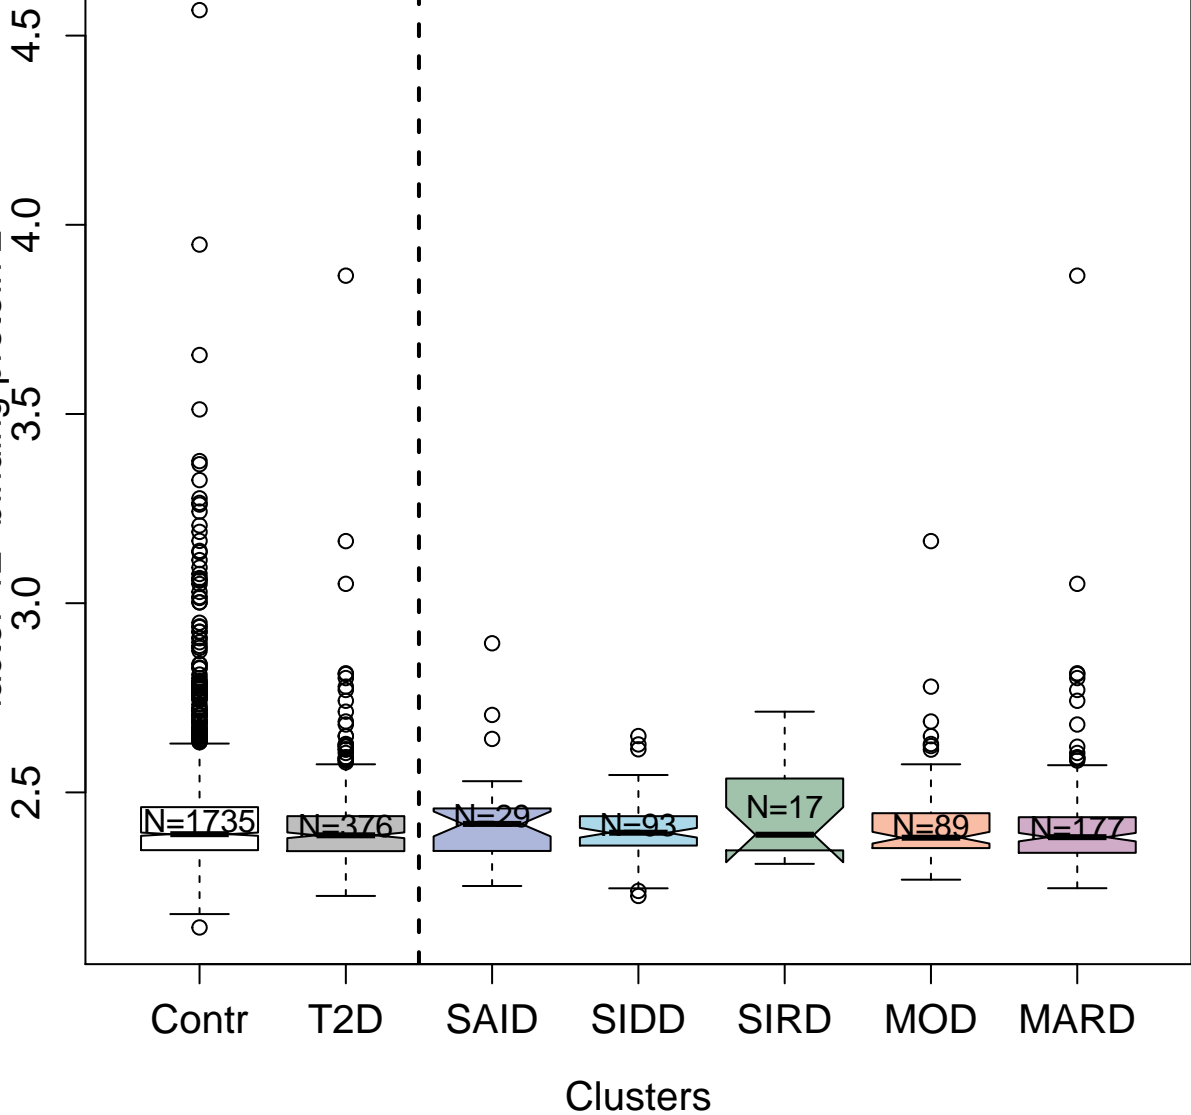

5939-42\_3 : Tumor necrosis factor ligand  
superfamily member 12

3.0 3.5 4.0

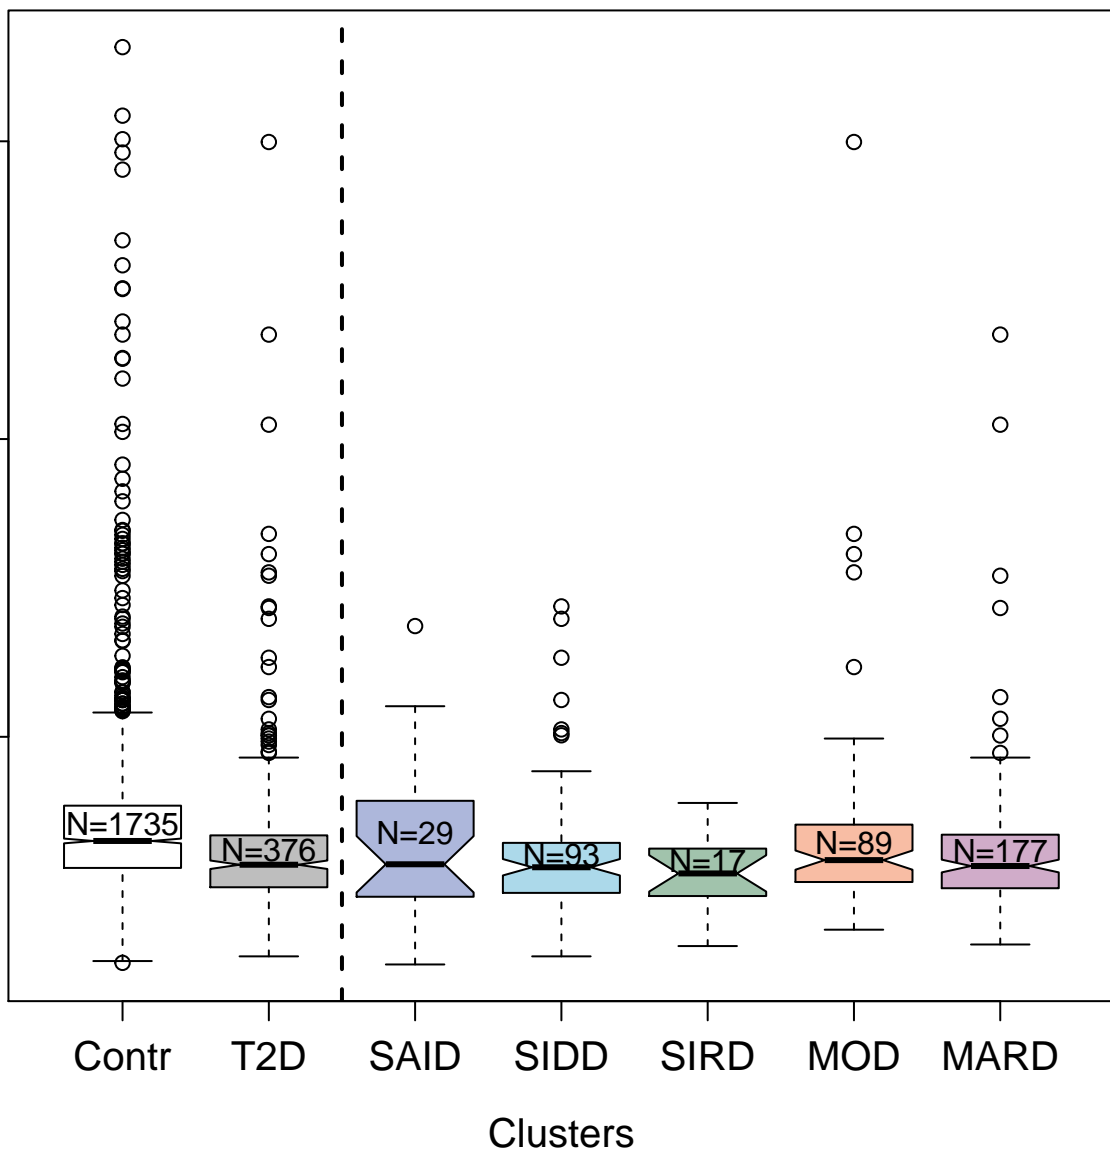

3418-12\_2 : Calcium/calmodulin-dependent protein kinase type 1D

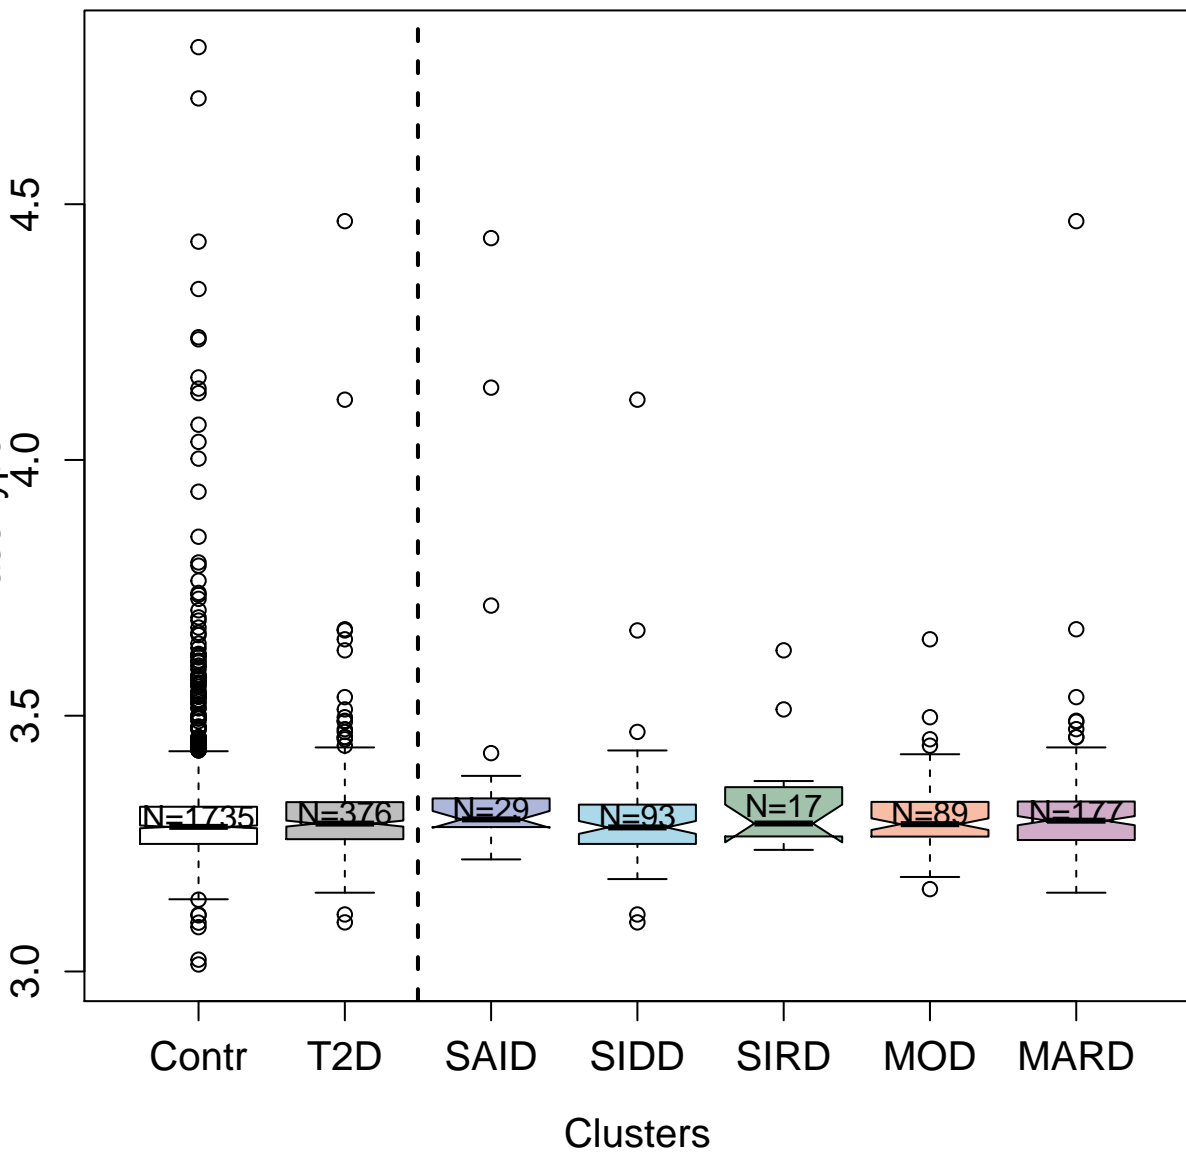

11094-104\_3 : Galectin-10

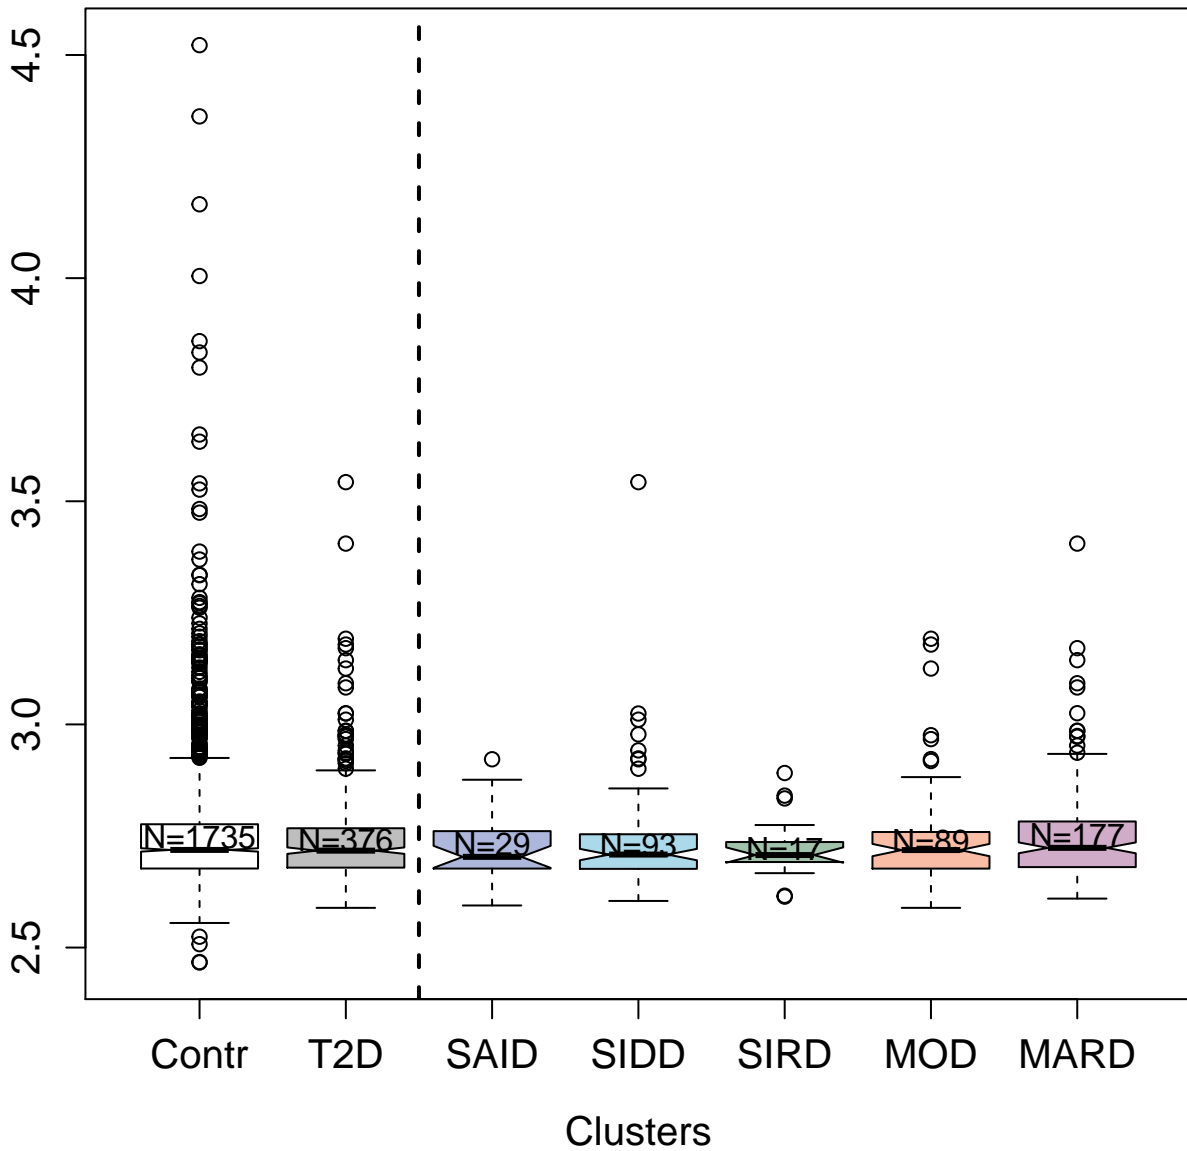

3603-60\_5 : C-type lectin domain family 7 member

A

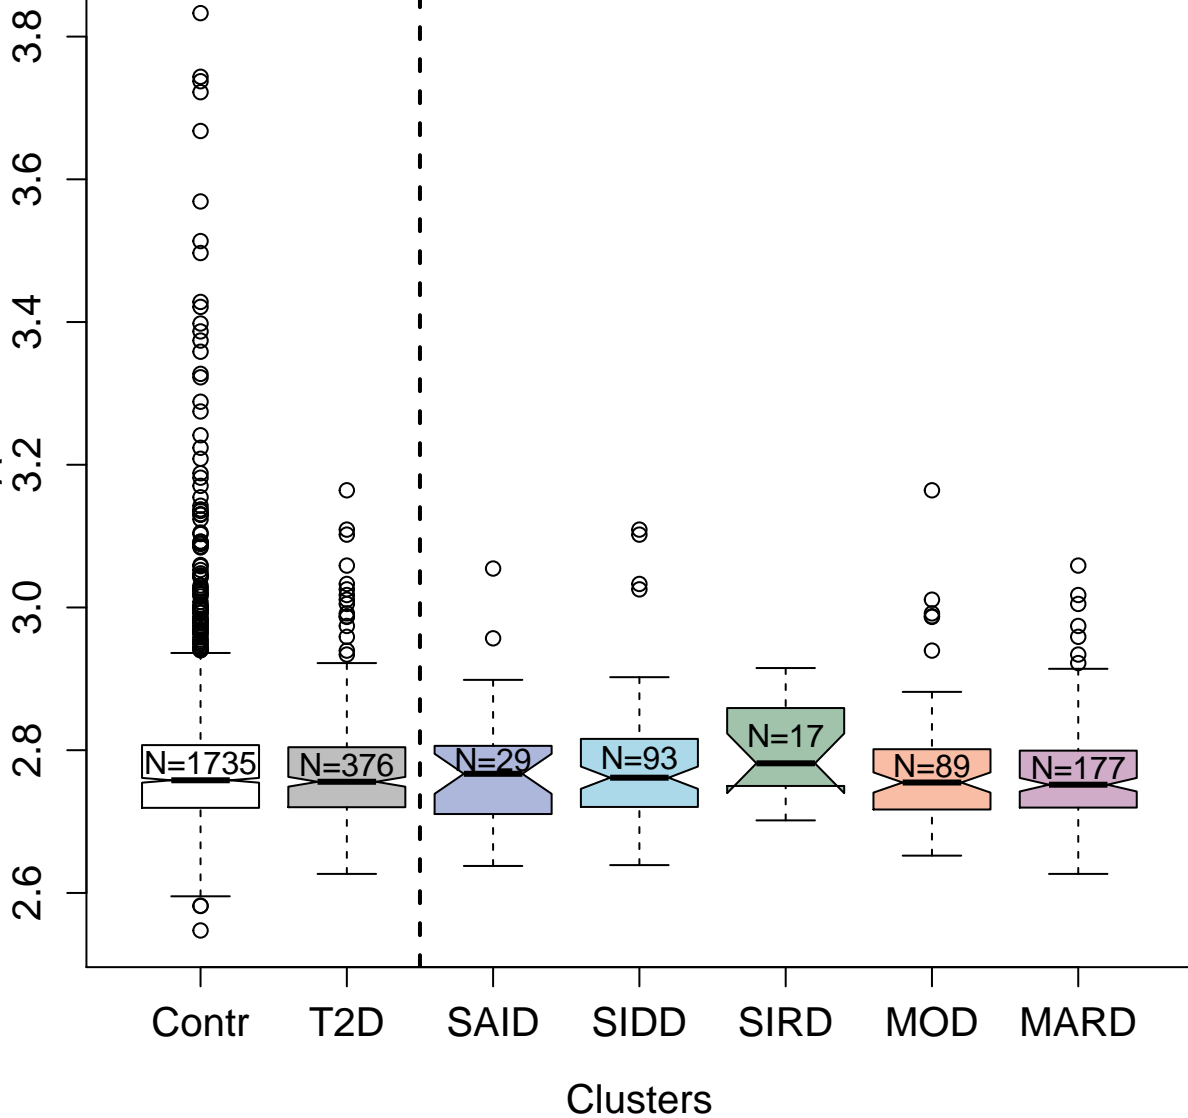

9183-7\_3 : Interferon alpha/beta receptor 1

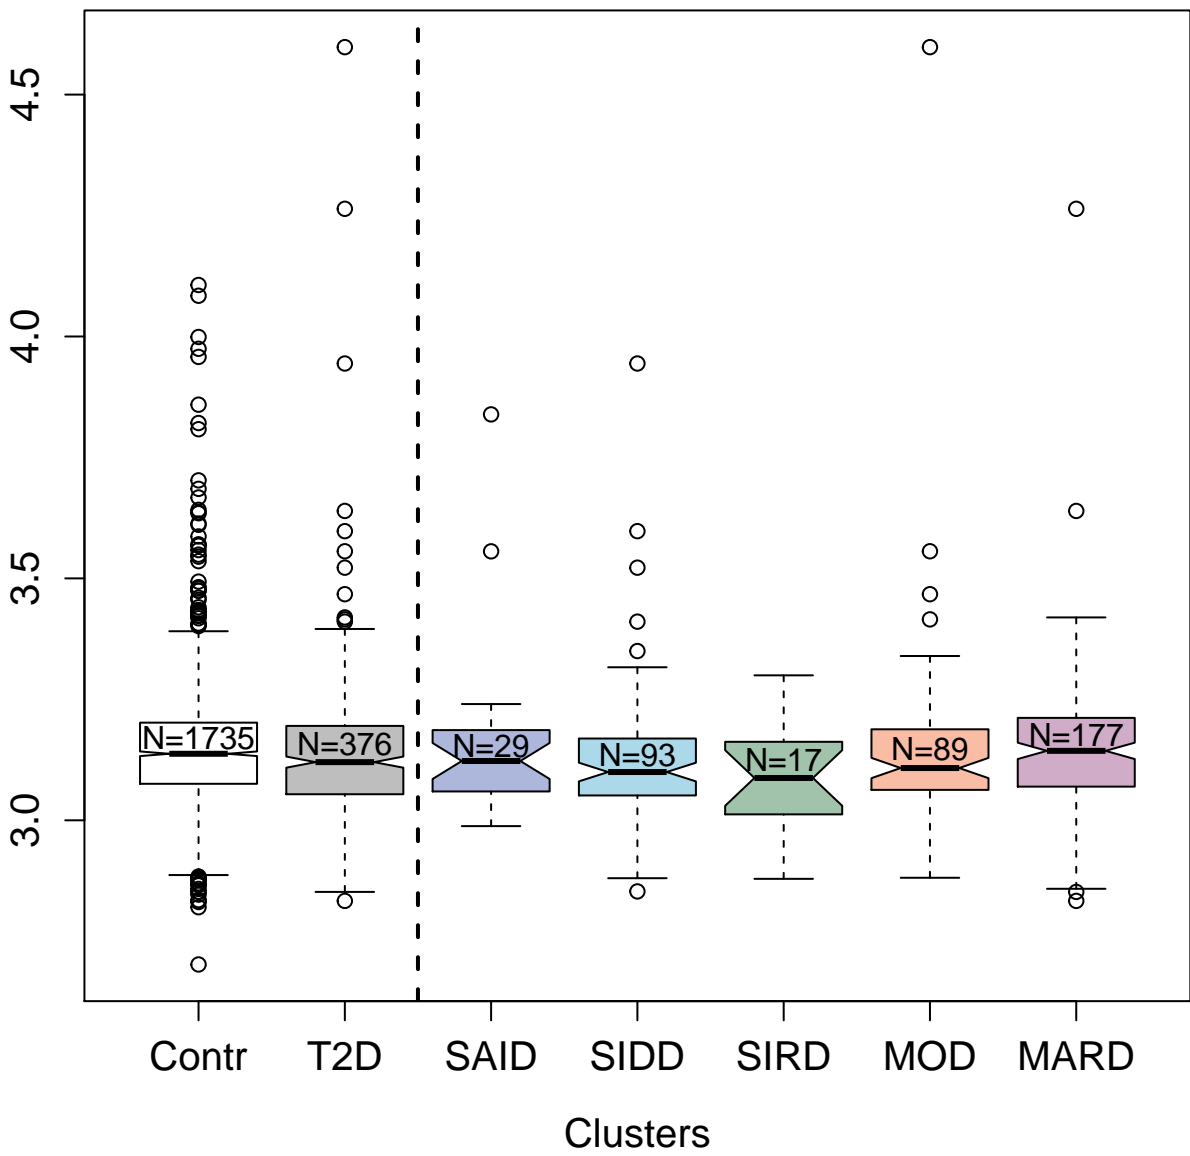

# 5117-14\_3 : Roundabout homolog 3

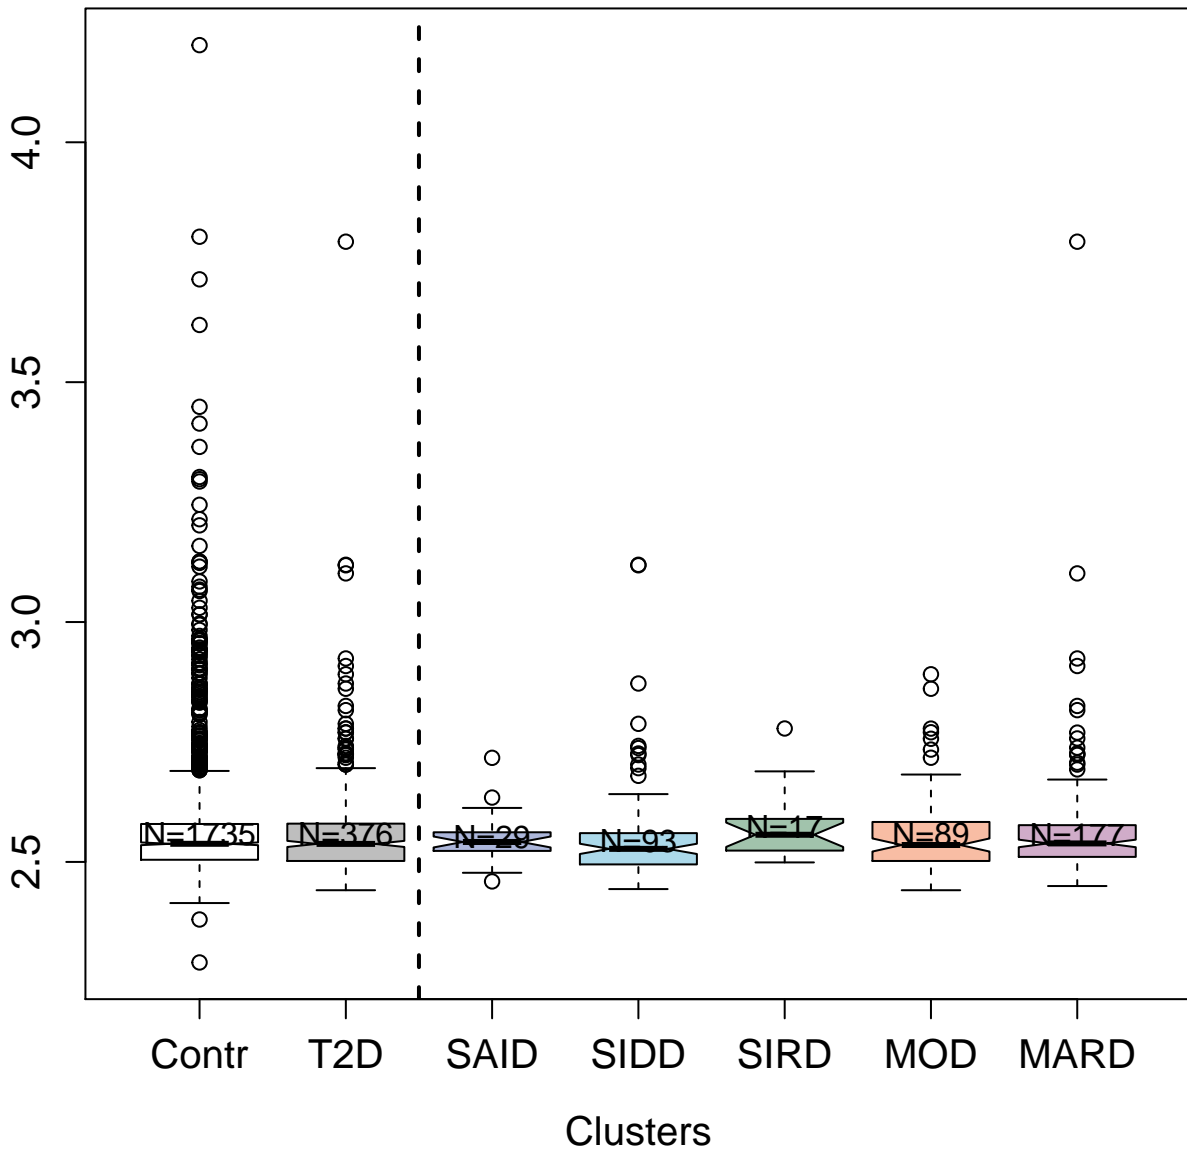



4459-68\_2 : Proprotein convertase  
subtilisin/kexin type 7

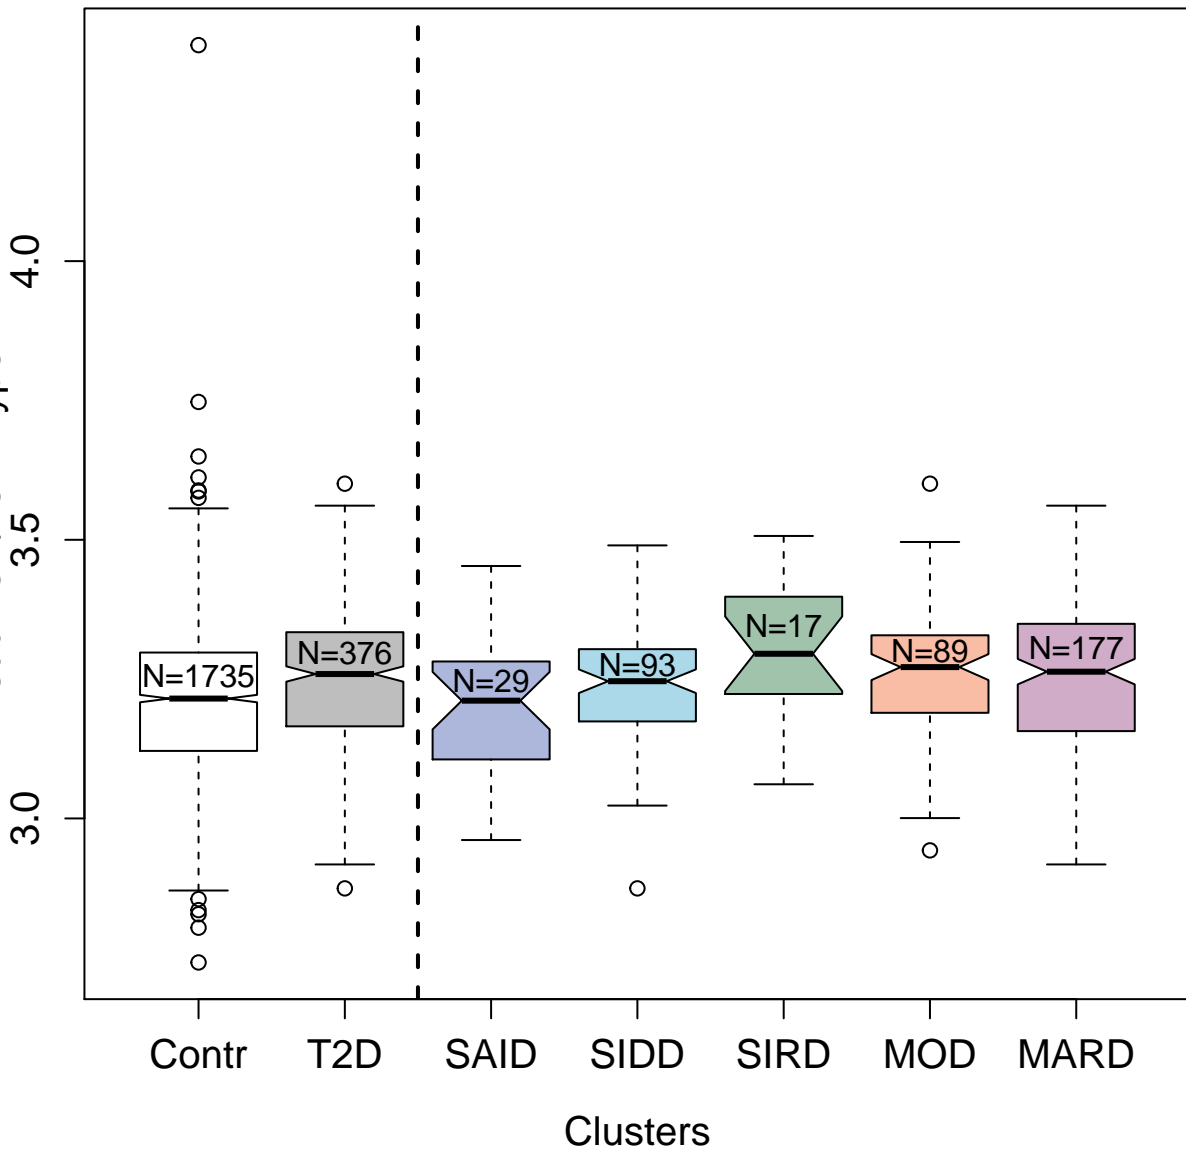

5111-15\_3 : Neurexin-3-beta

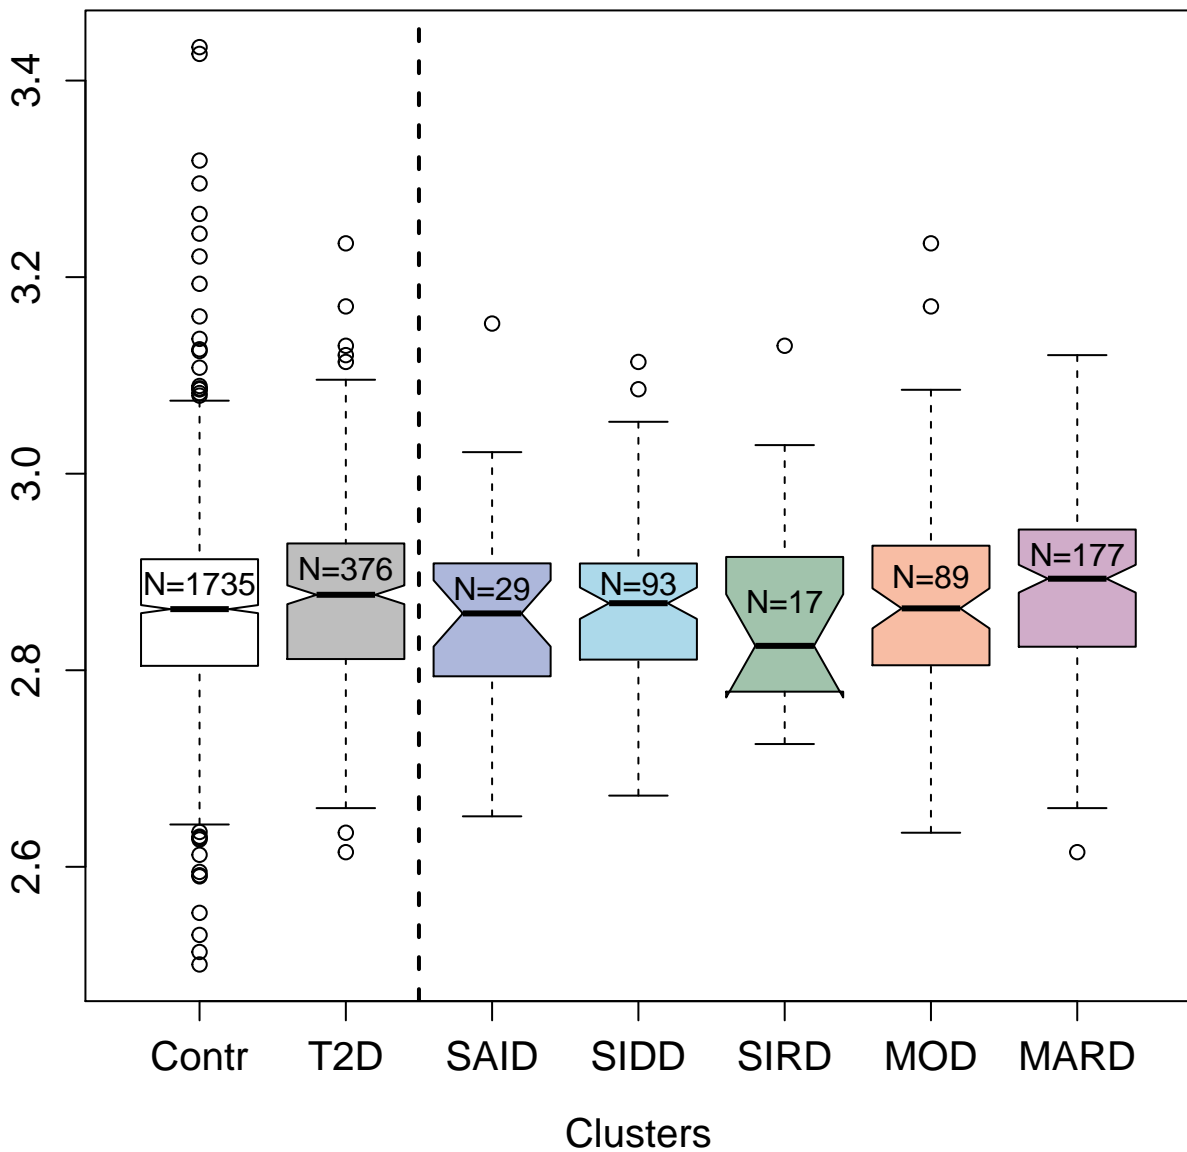

3414-40\_2 : Cytoplasmic tyrosine-protein kinase  
BMX

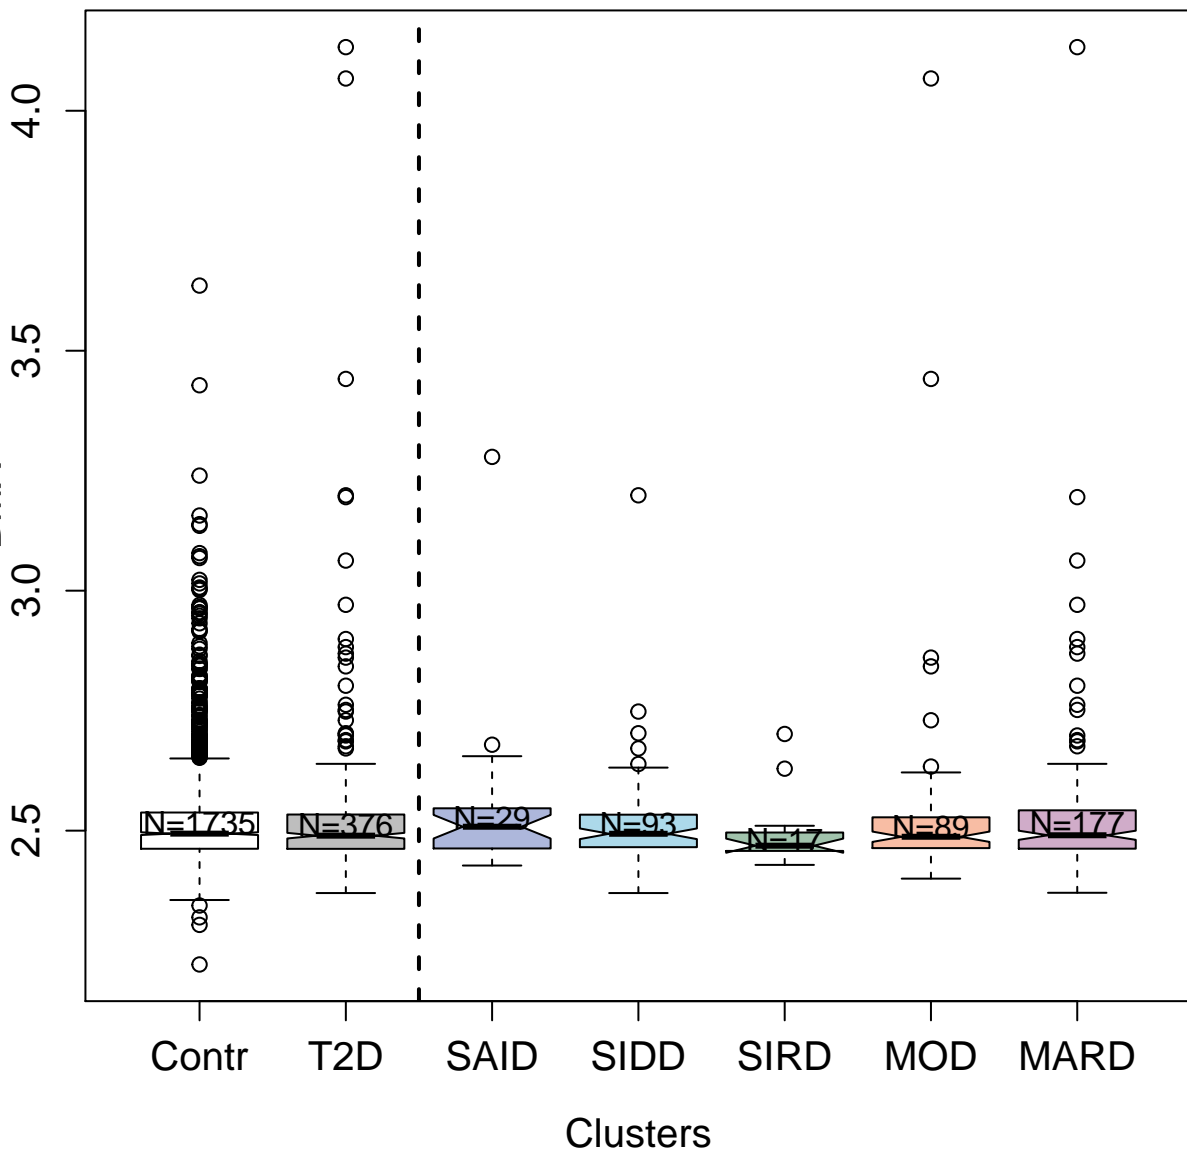

2607-54\_2 : Cytokine receptor-like factor  
1:Cardiotrophin-like cytokine factor 1 Complex

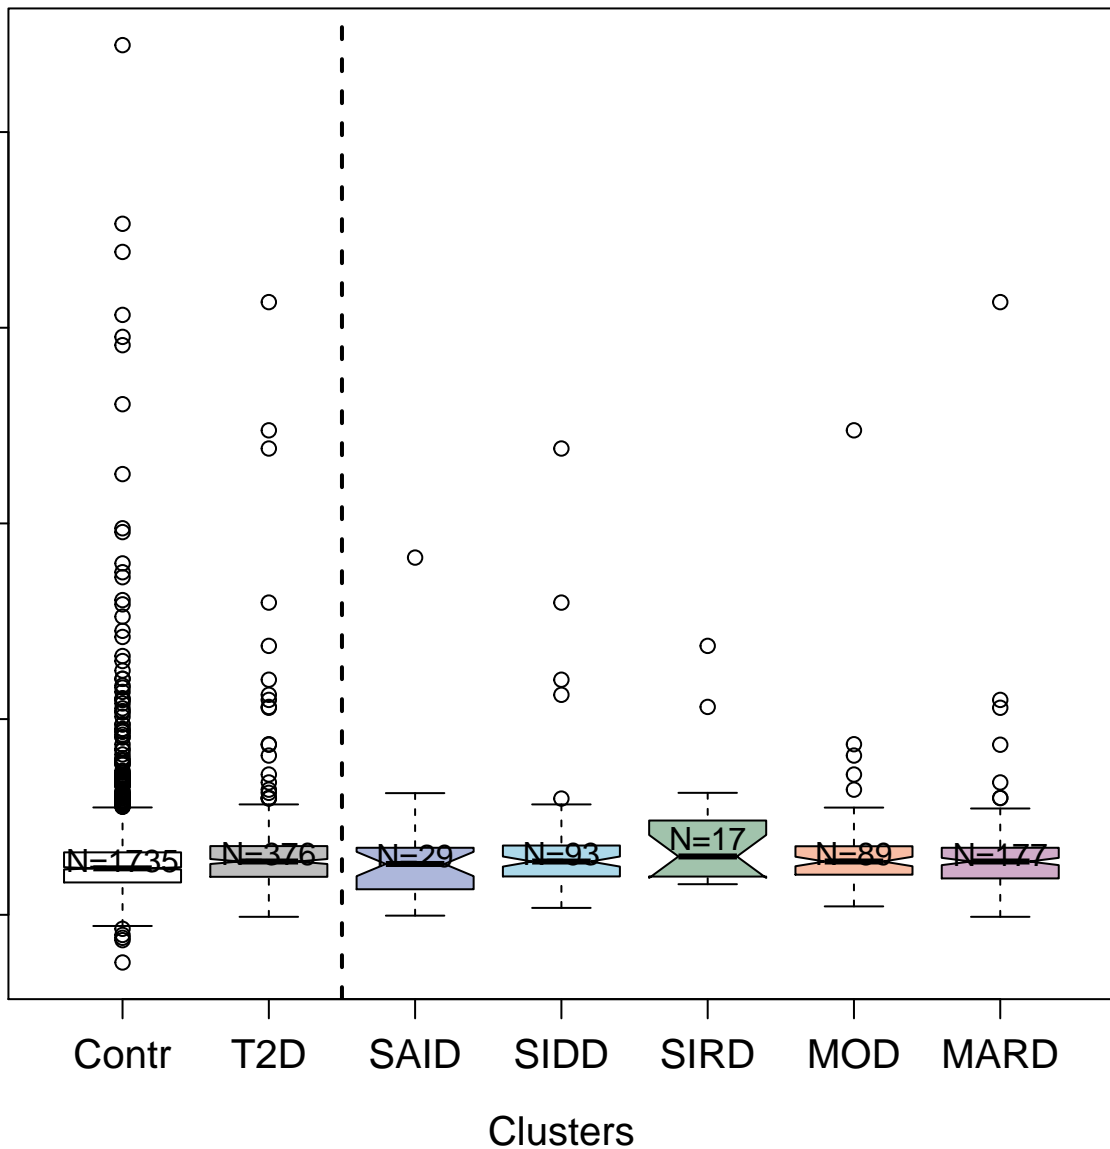

2811-27\_1 : Angiopoietin-1

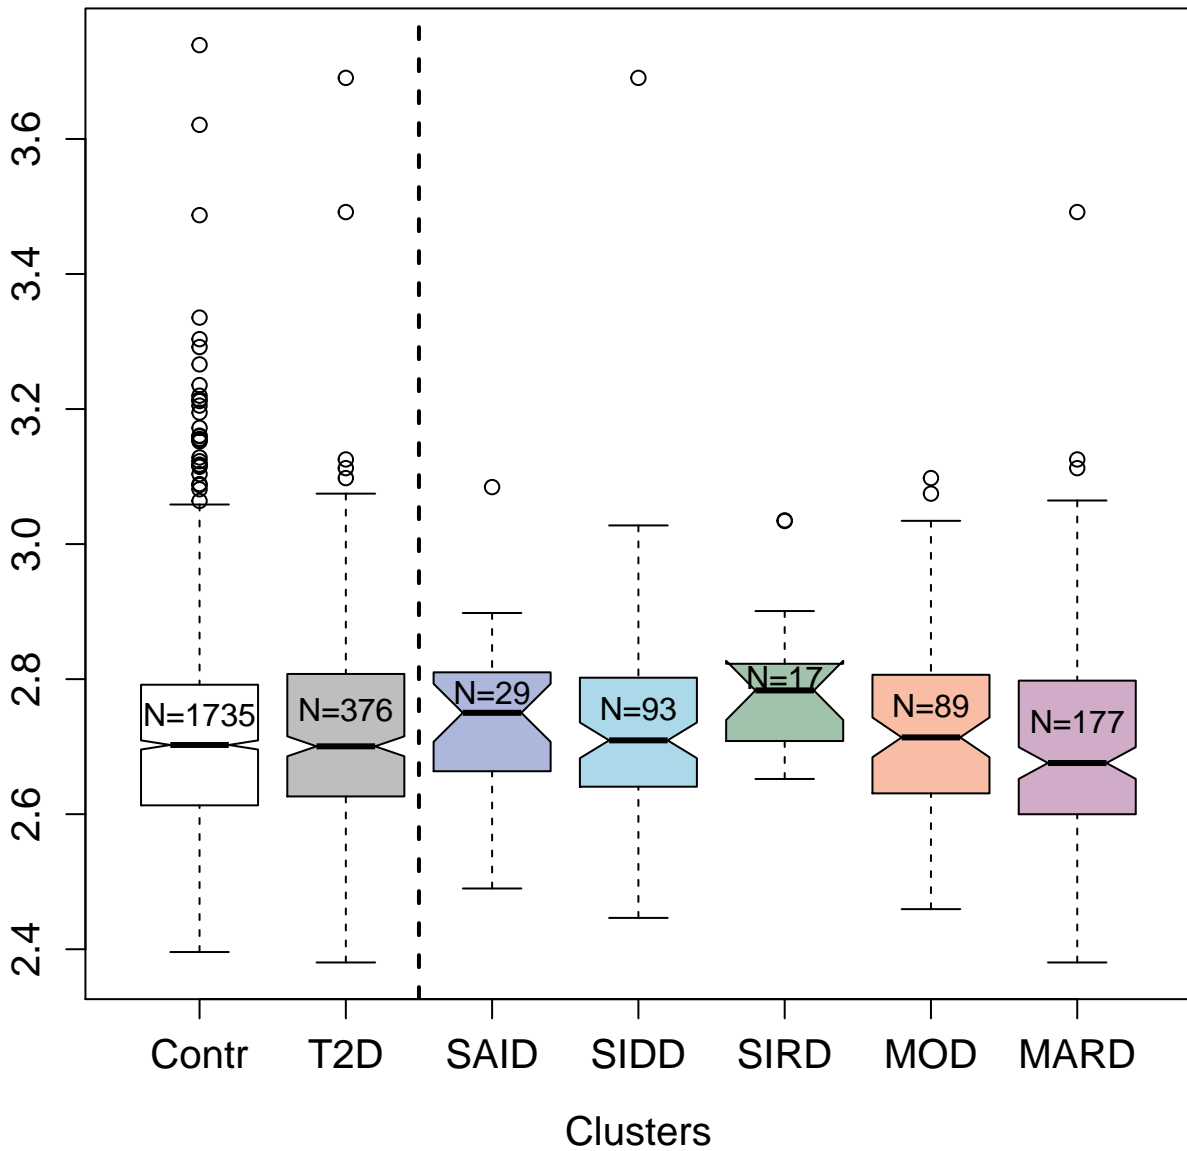

5350-14\_2 : Glypican-6

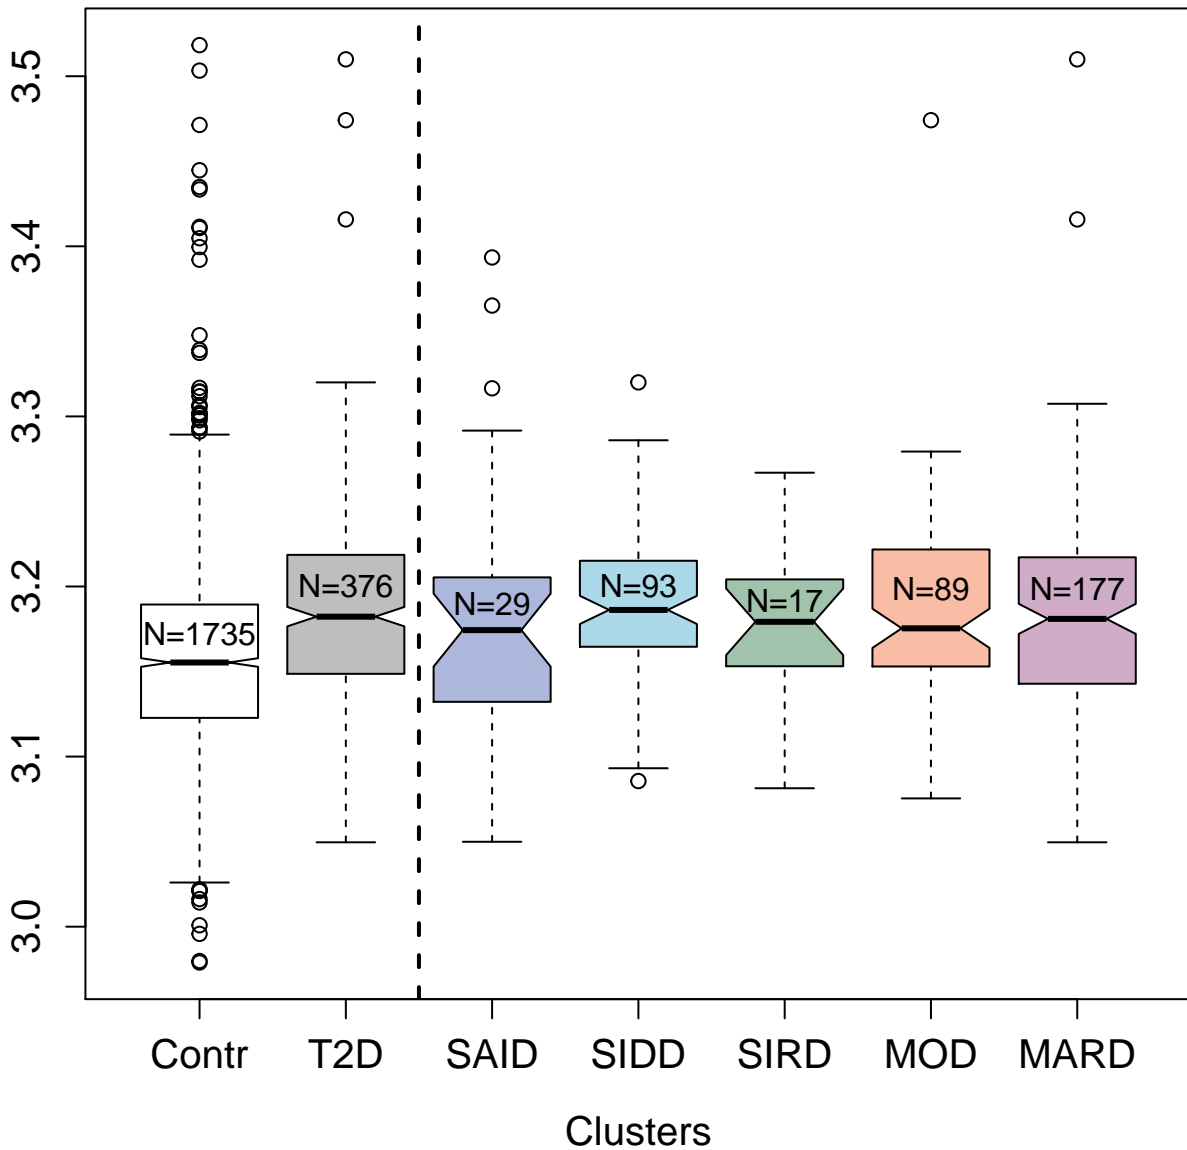

4548-4\_2 : Galactoside 3(4)-L-fucosyltransferase

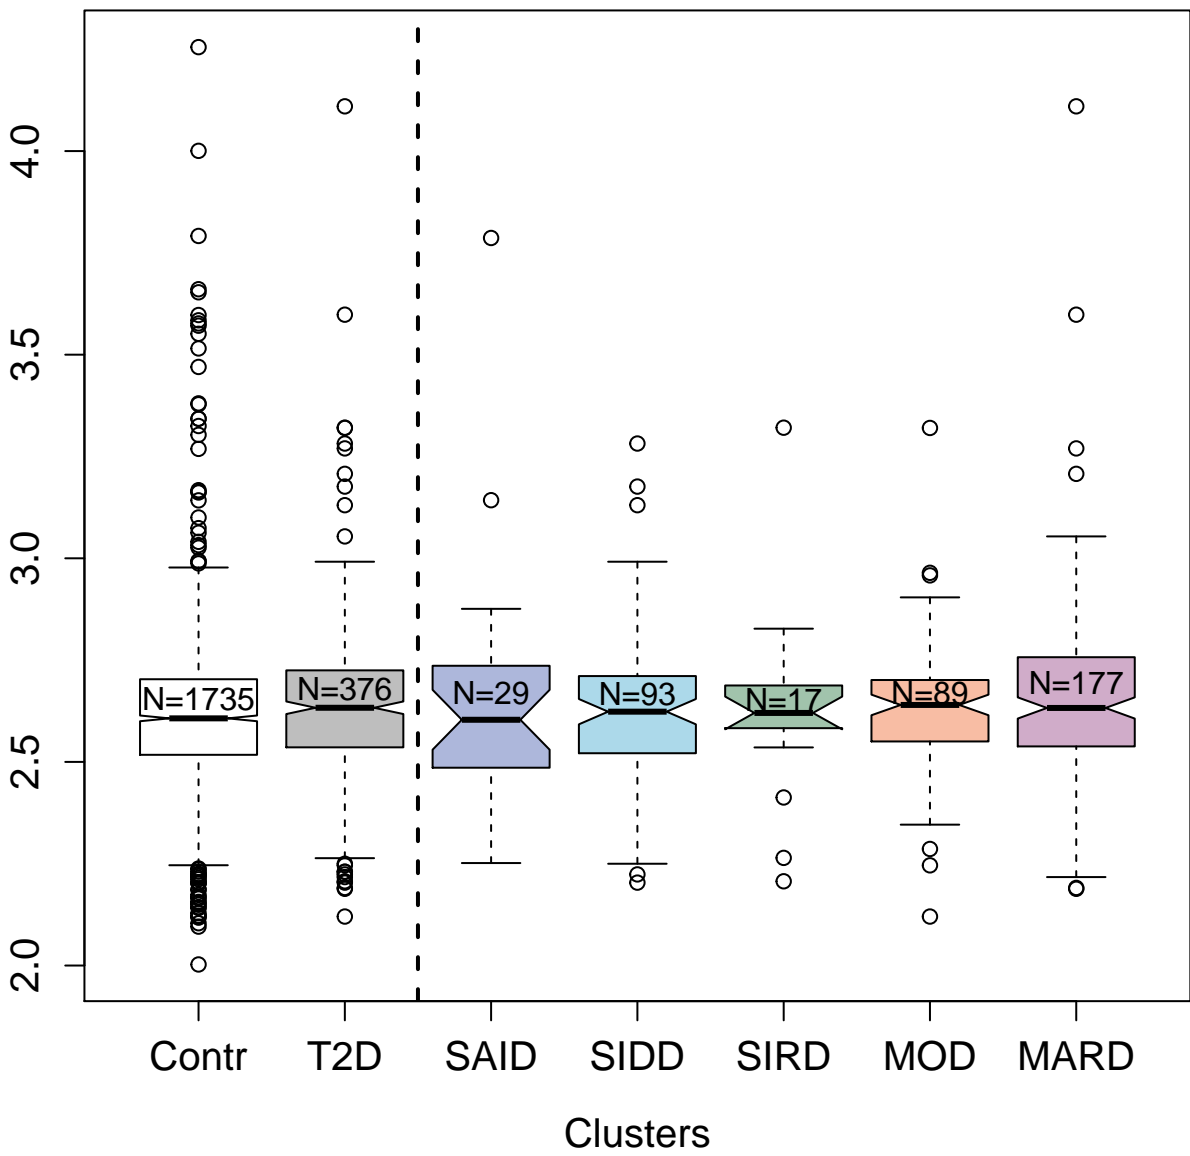

4540-11\_2 : Chromobox protein homolog 5

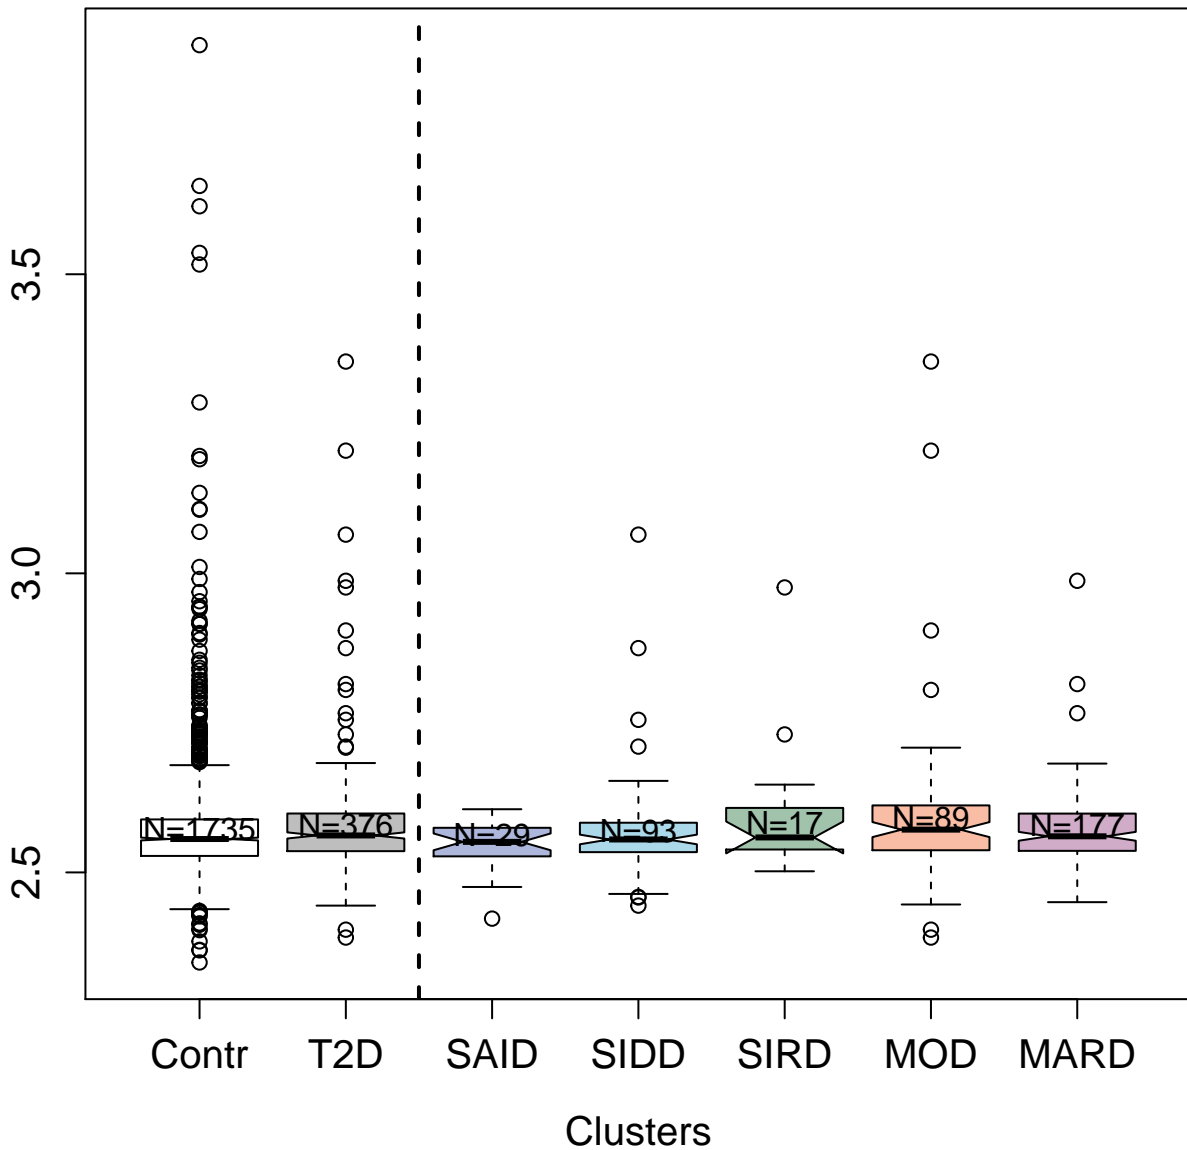



3182-38\_2 : Ectonucleoside triphosphate  
diphosphohydrolase 1

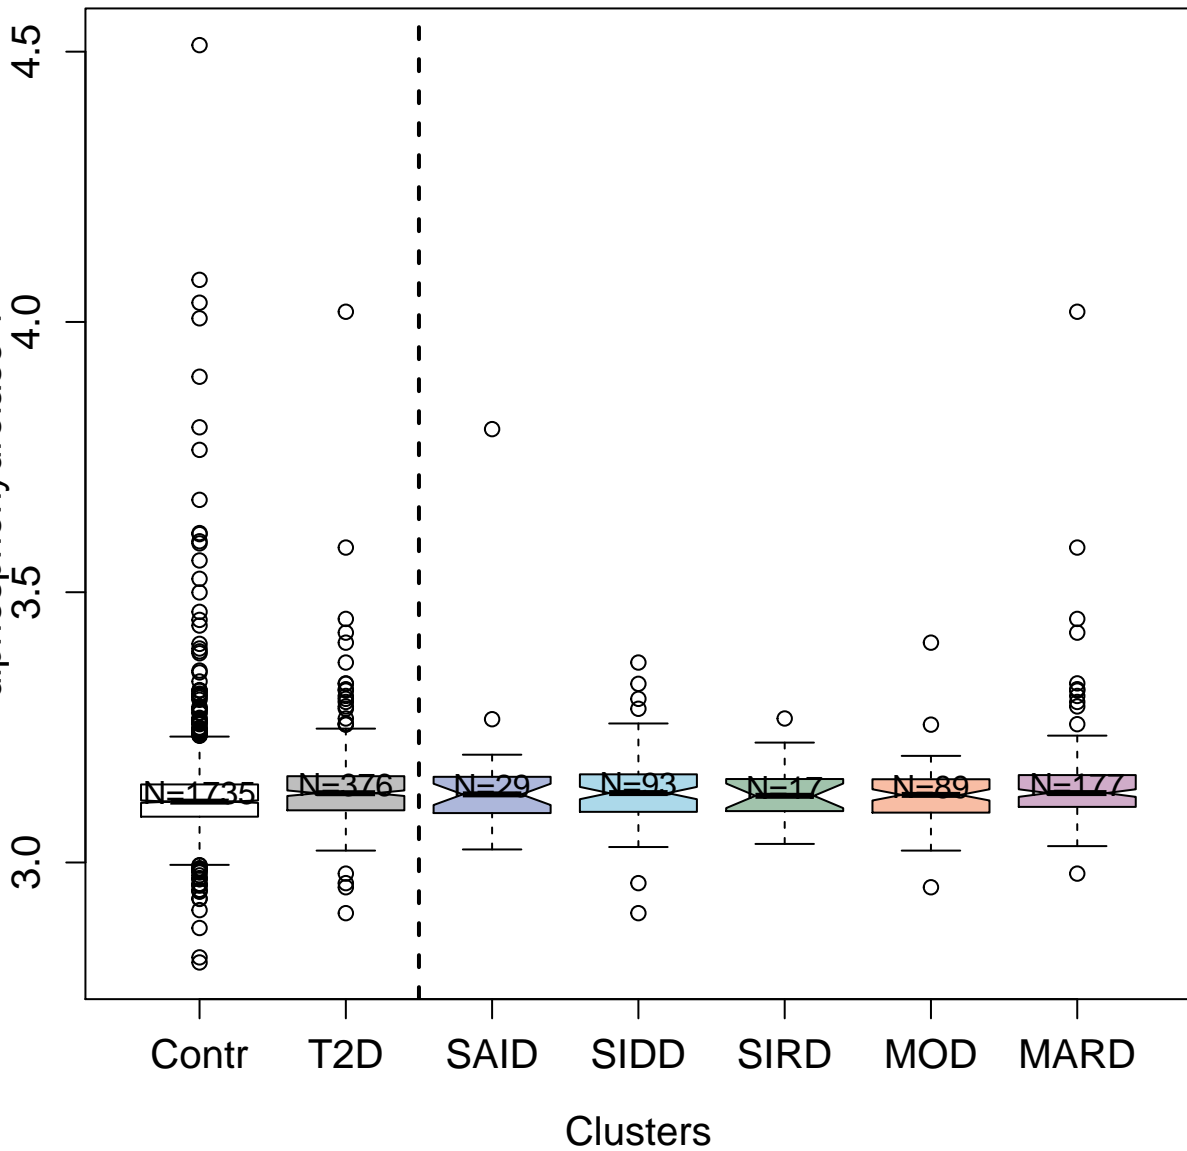

2715-25\_2 : Erythropoietin receptor

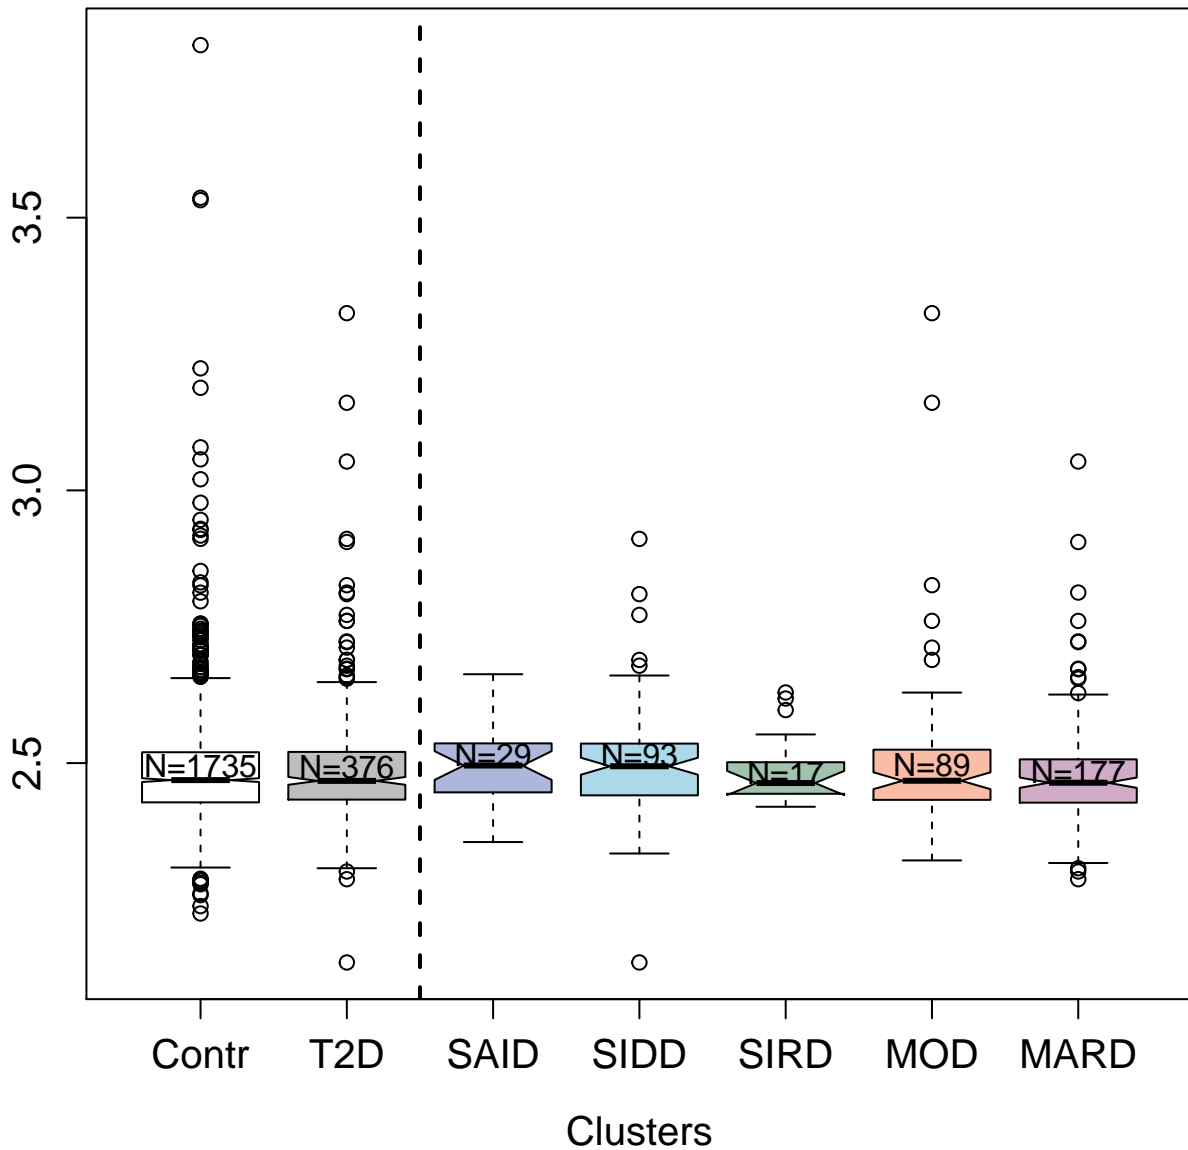

3201-49\_2 : Kallikrein-5

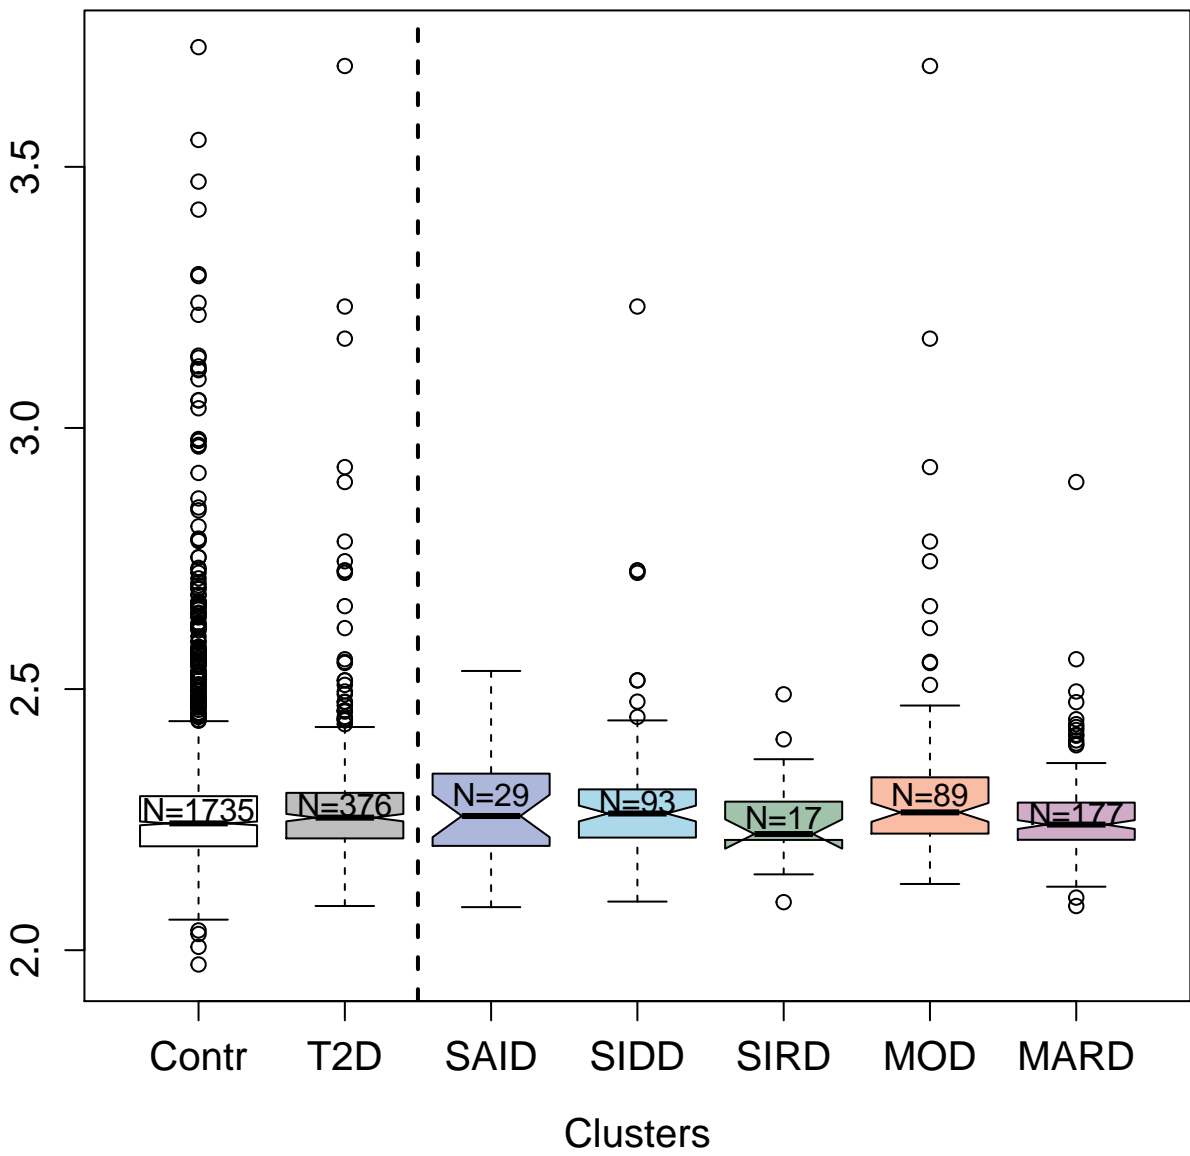

4271-75\_2 : Prefoldin subunit 5

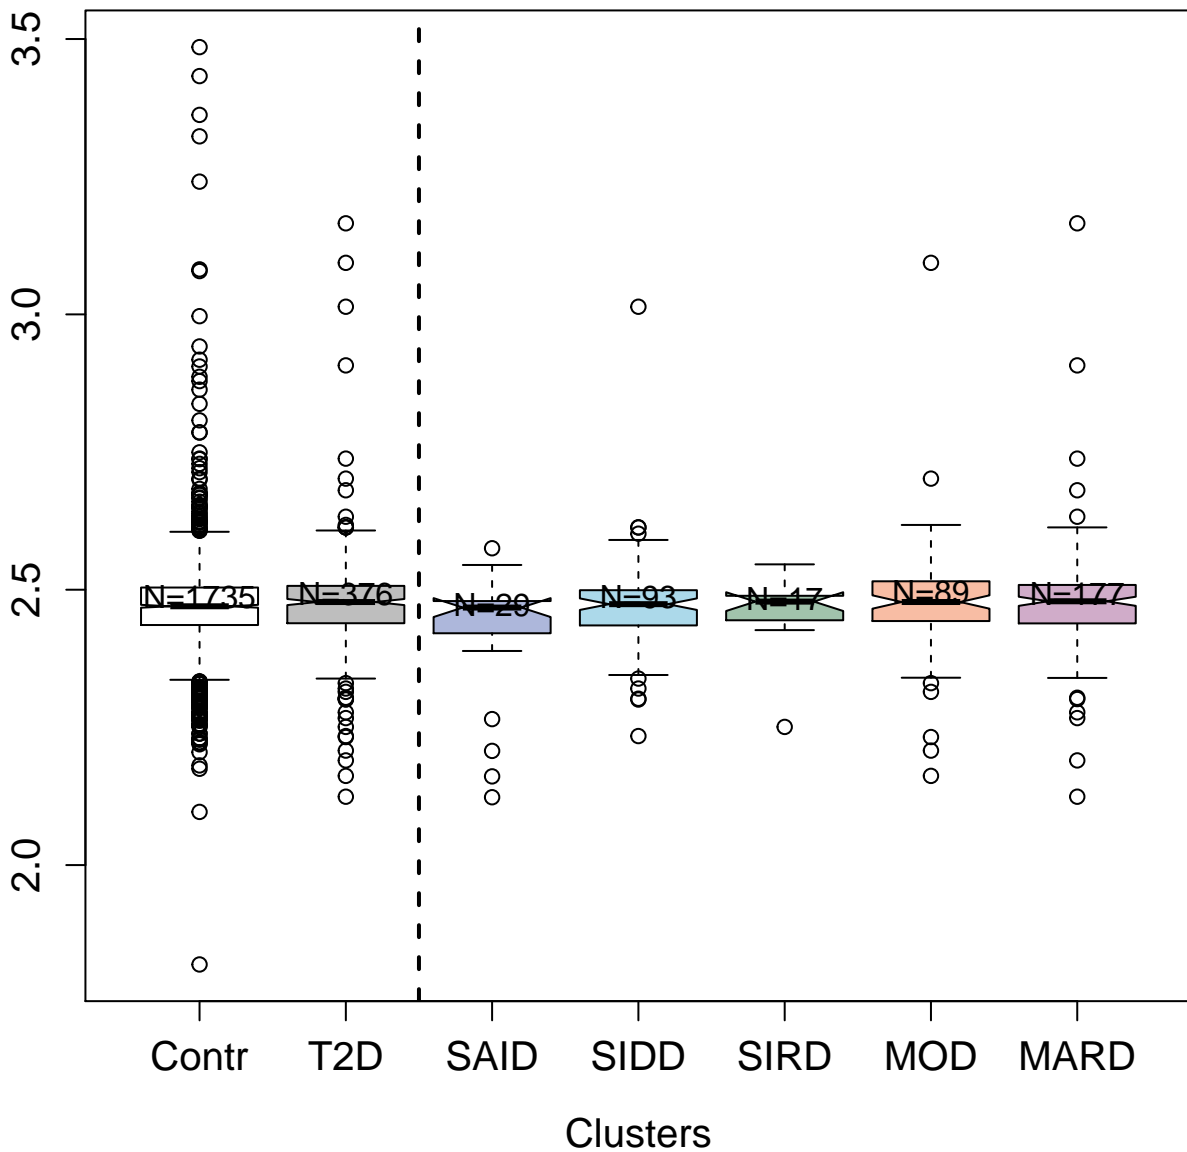

4284-18\_3 : RNA-binding protein 39

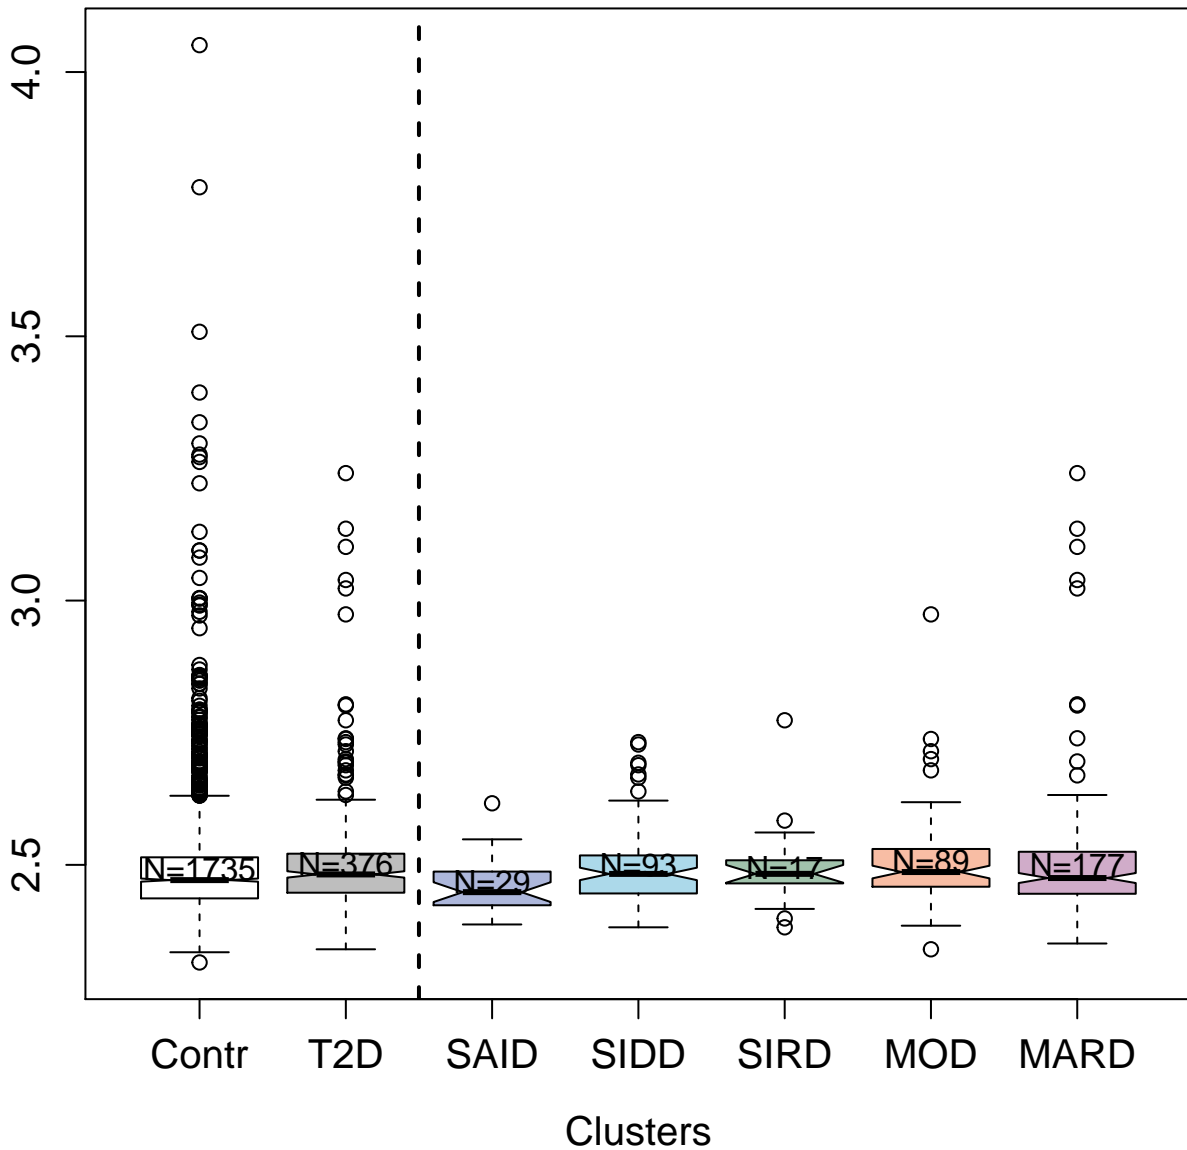

5102-55\_3 : MHC class I polypeptide-related sequence B

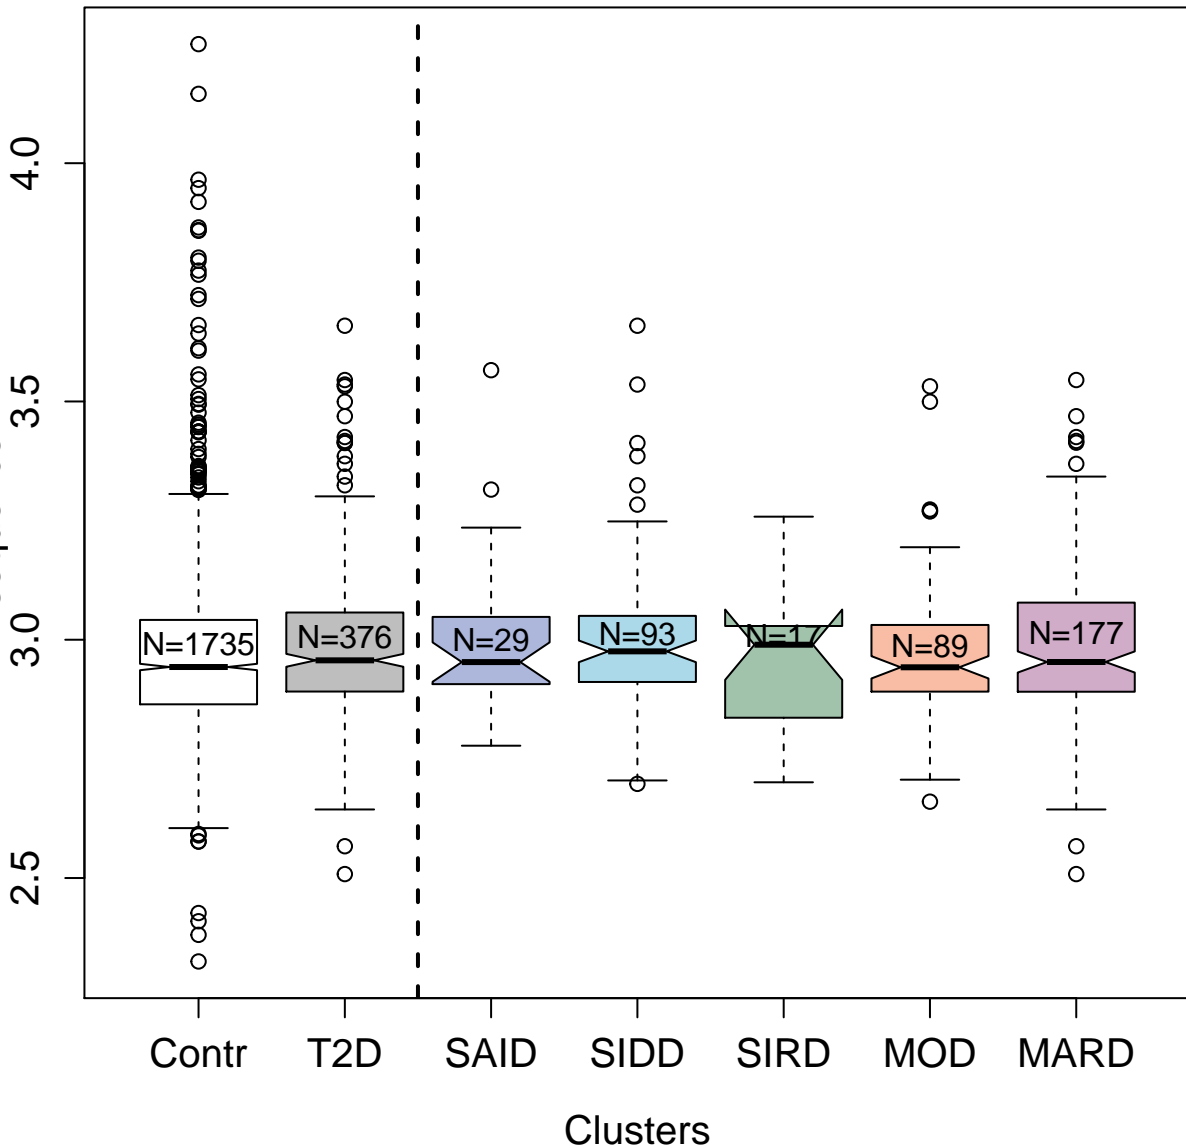

5060-62\_3 : Programmed cell death 1 ligand 1

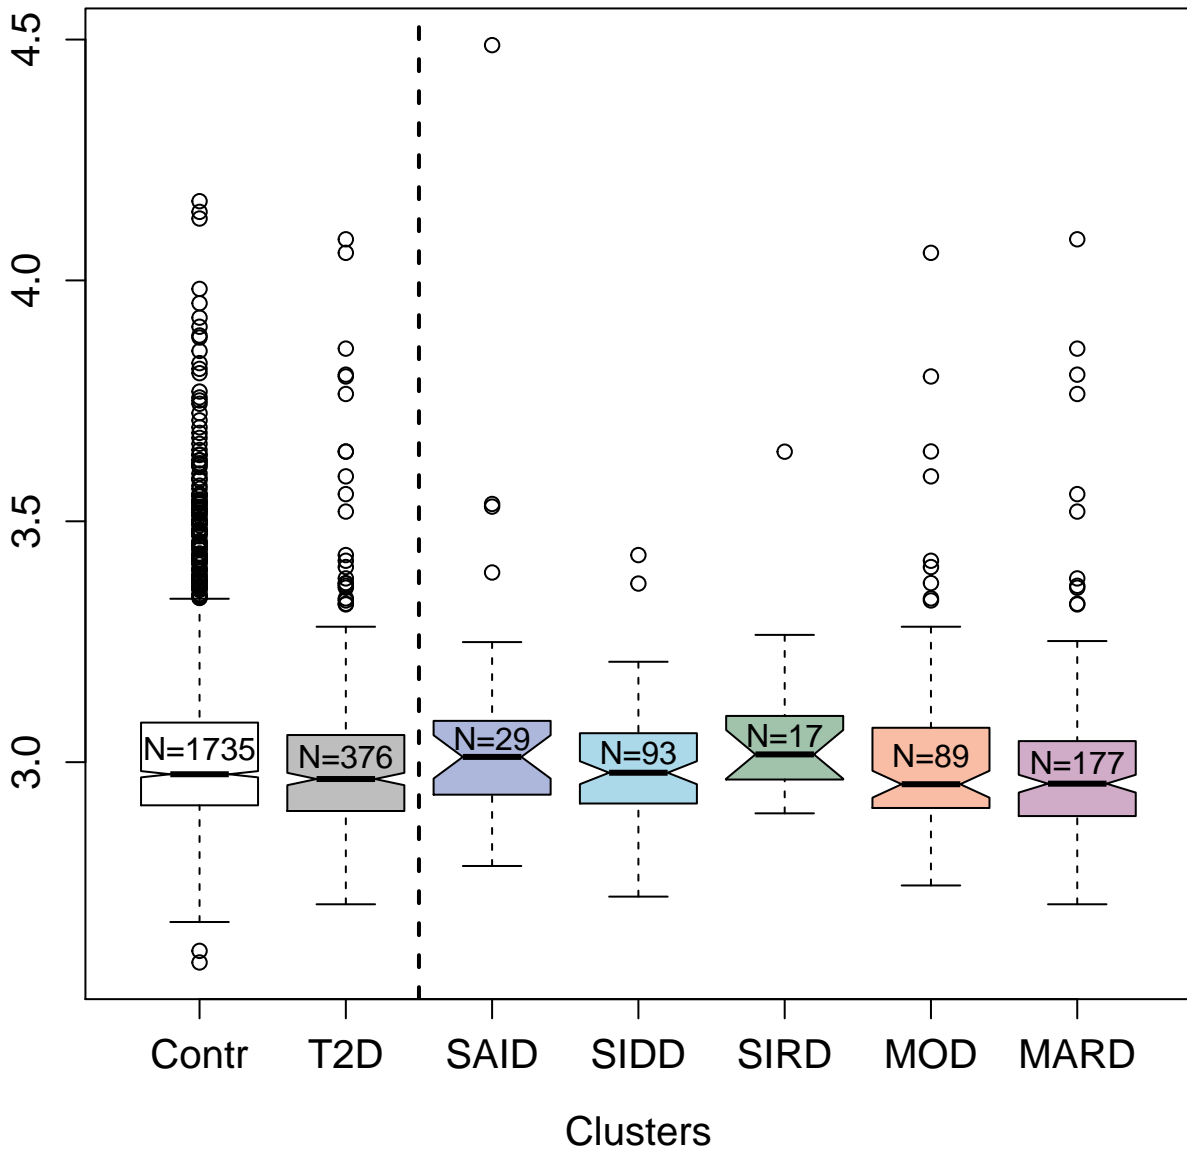

8469-41\_3 : Insulin-like growth factor-binding

protein 2

4.5  
4.0  
3.5  
3.0  
2.5

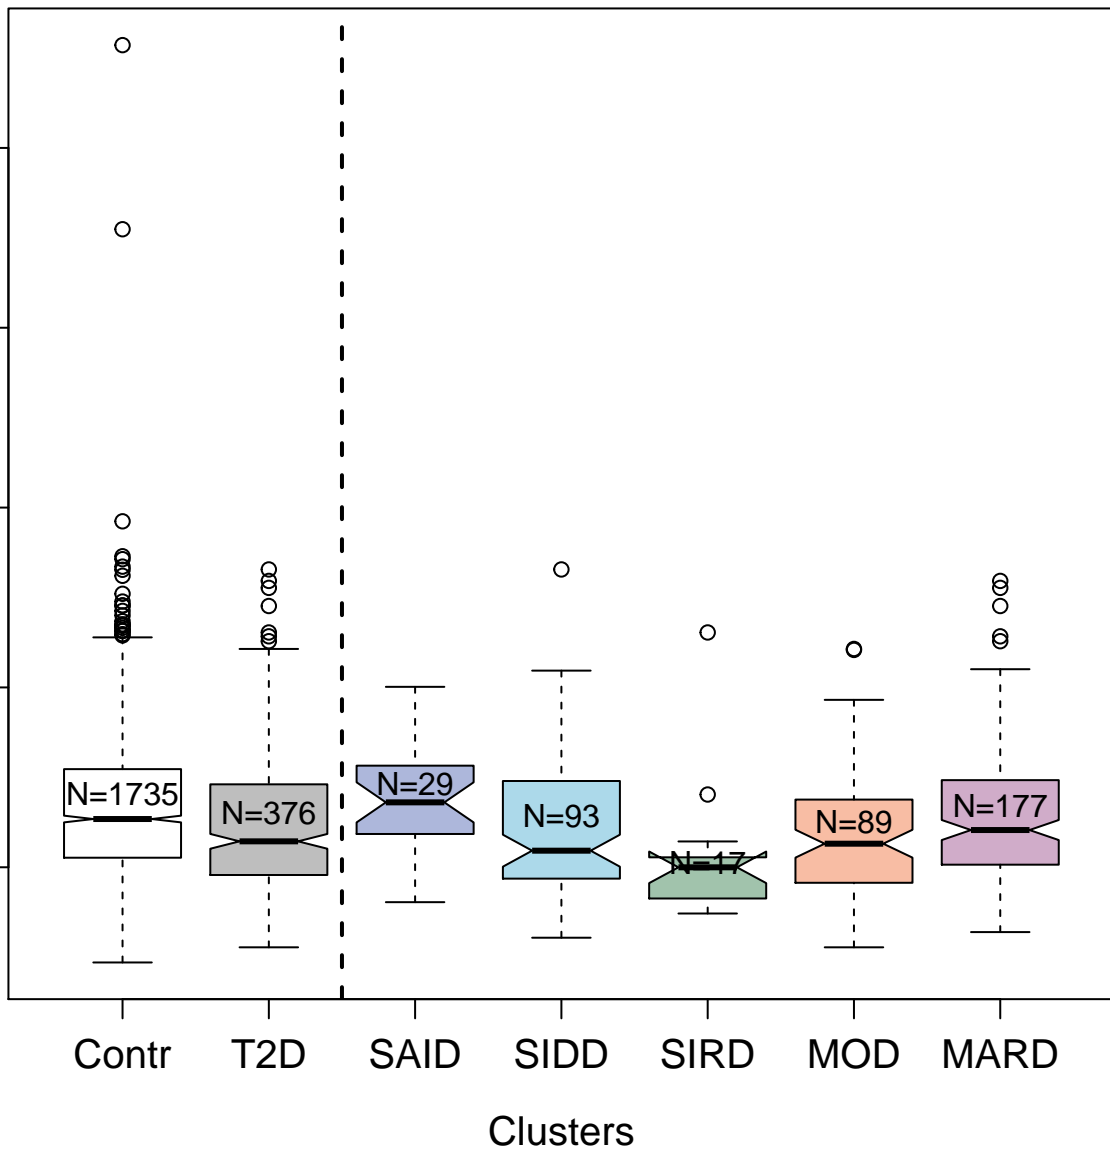



3003-29\_2 : Natural cytotoxicity triggering receptor 3

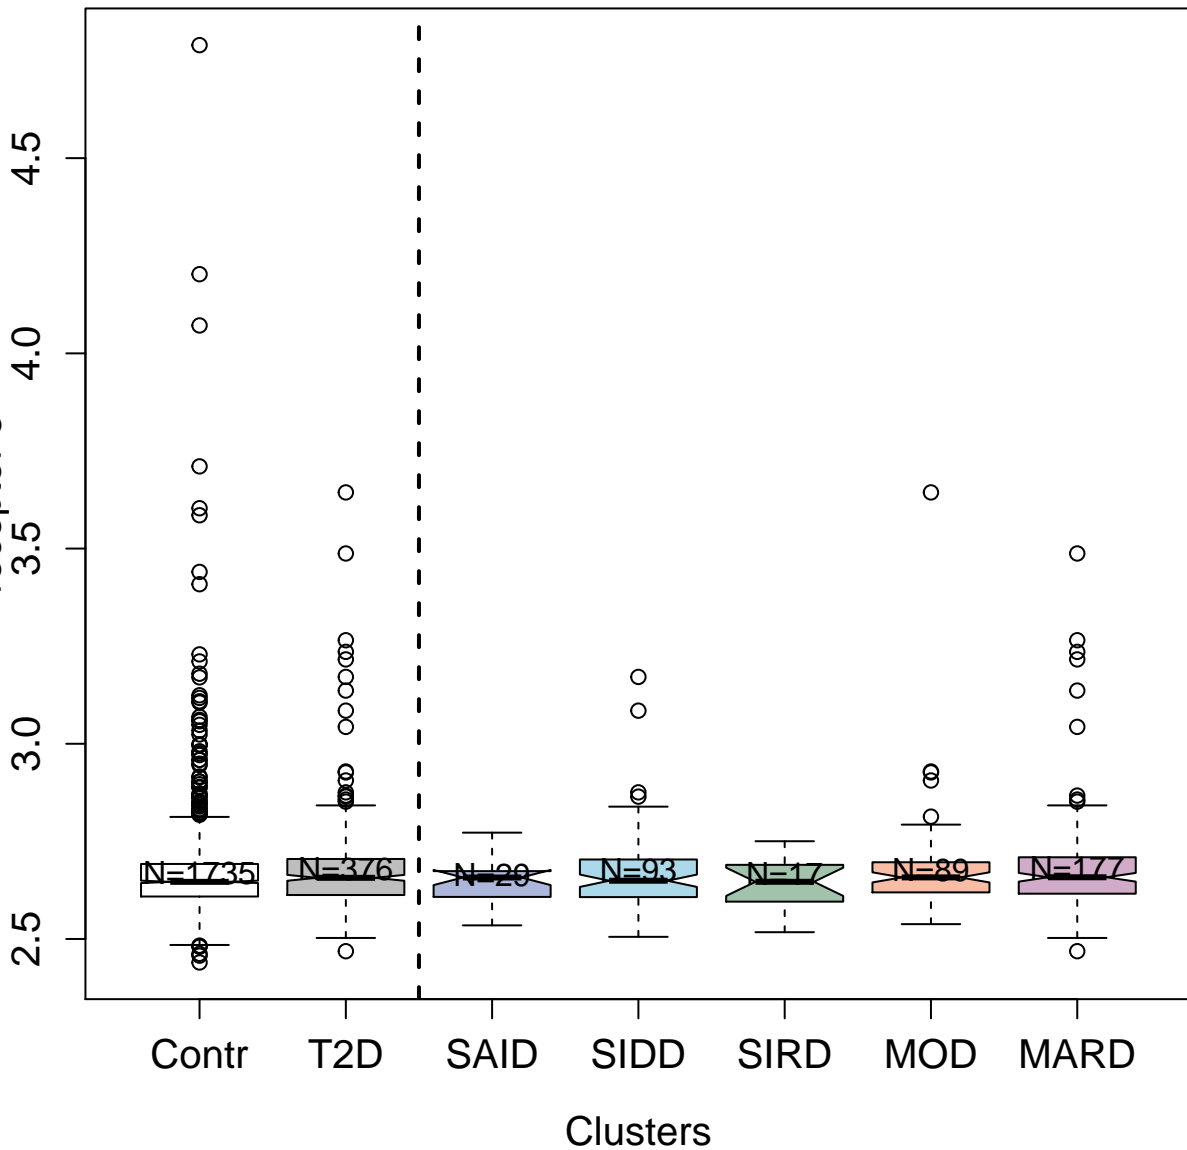

3313-21\_2 : Ficolin-2

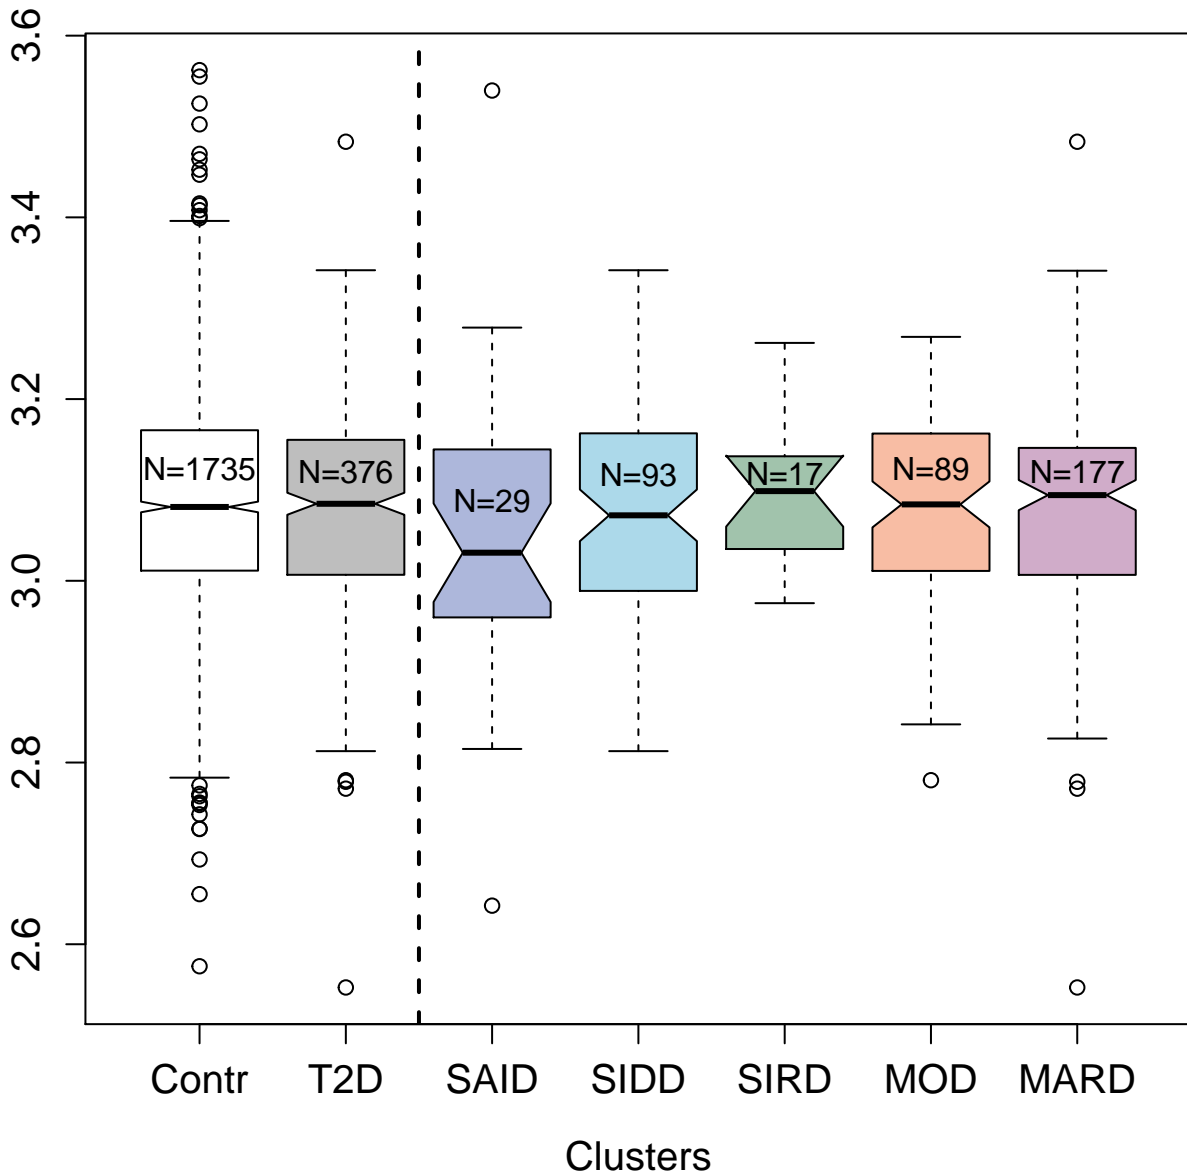

4880-21\_1 : Growth/differentiation factor 2

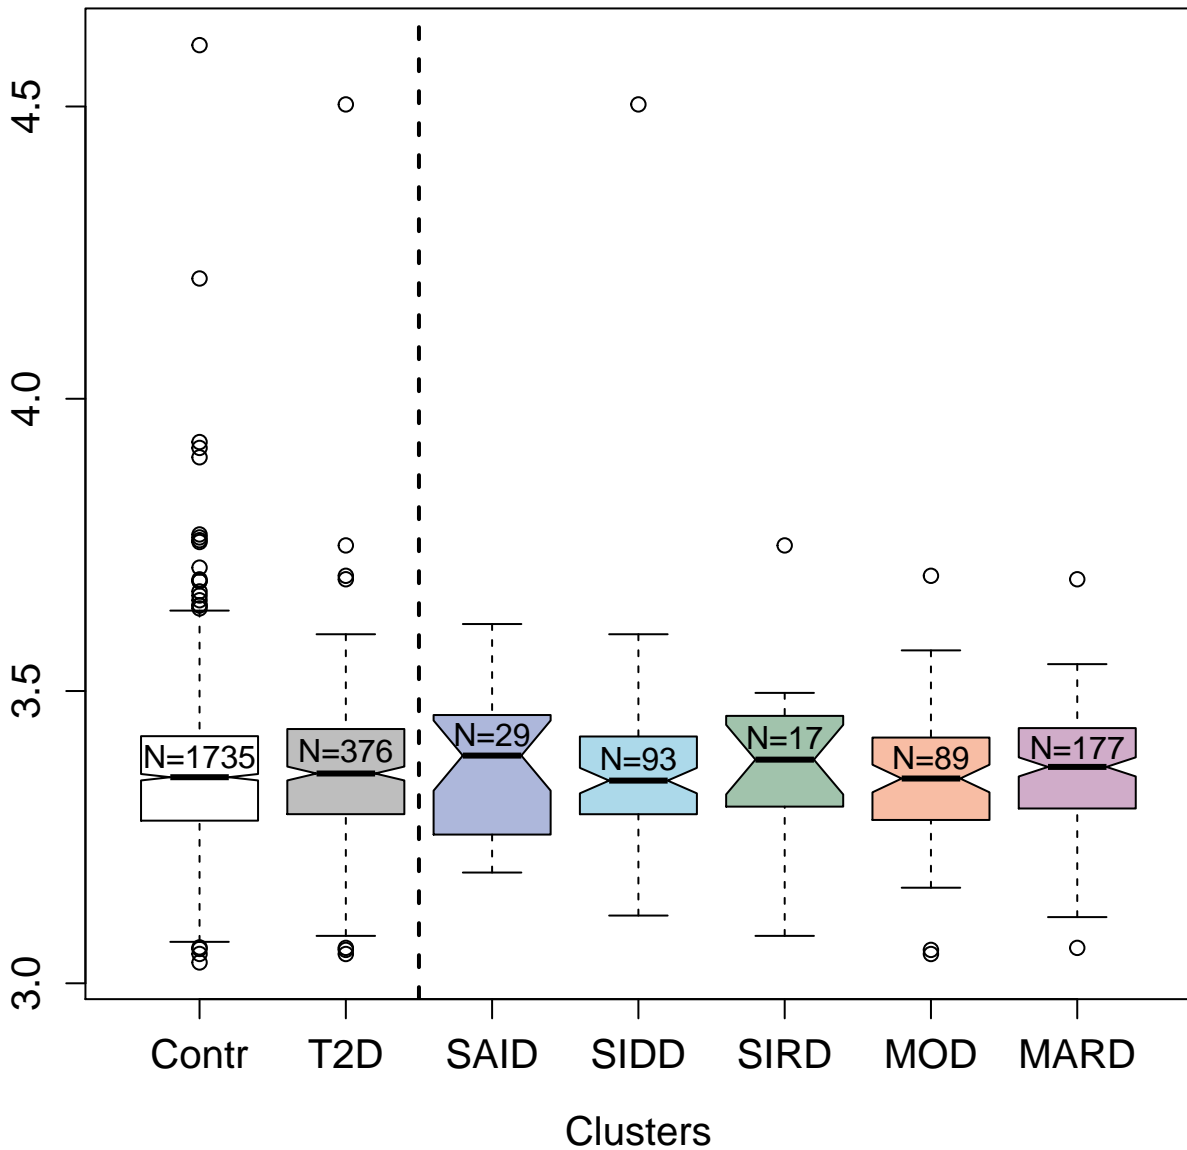

4122-12\_2 : Epithelial discoidin domain-containing receptor 1

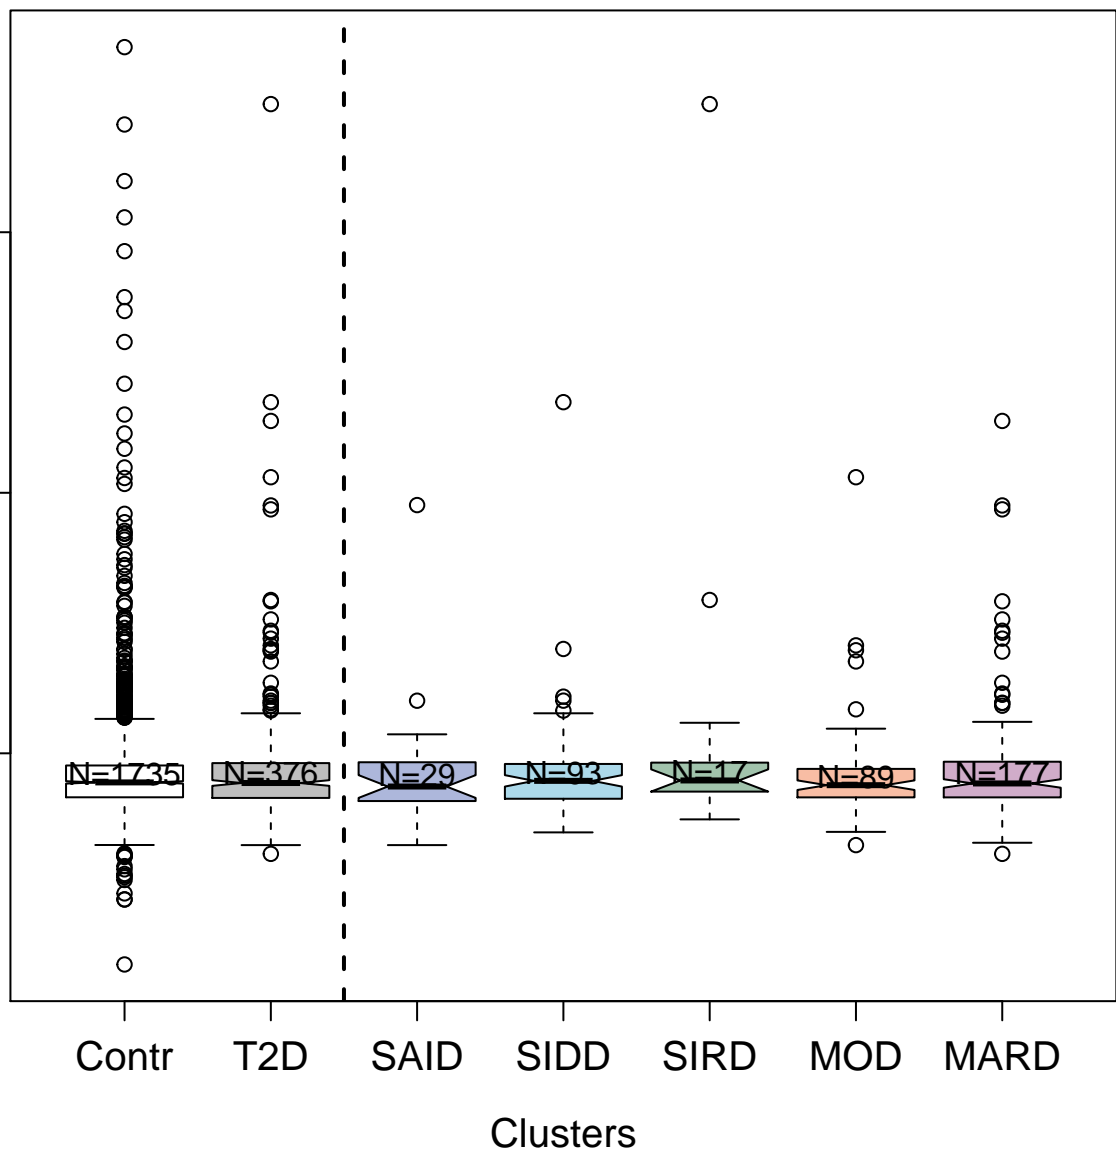

9211-19\_3 : Pigment epithelium-derived factor

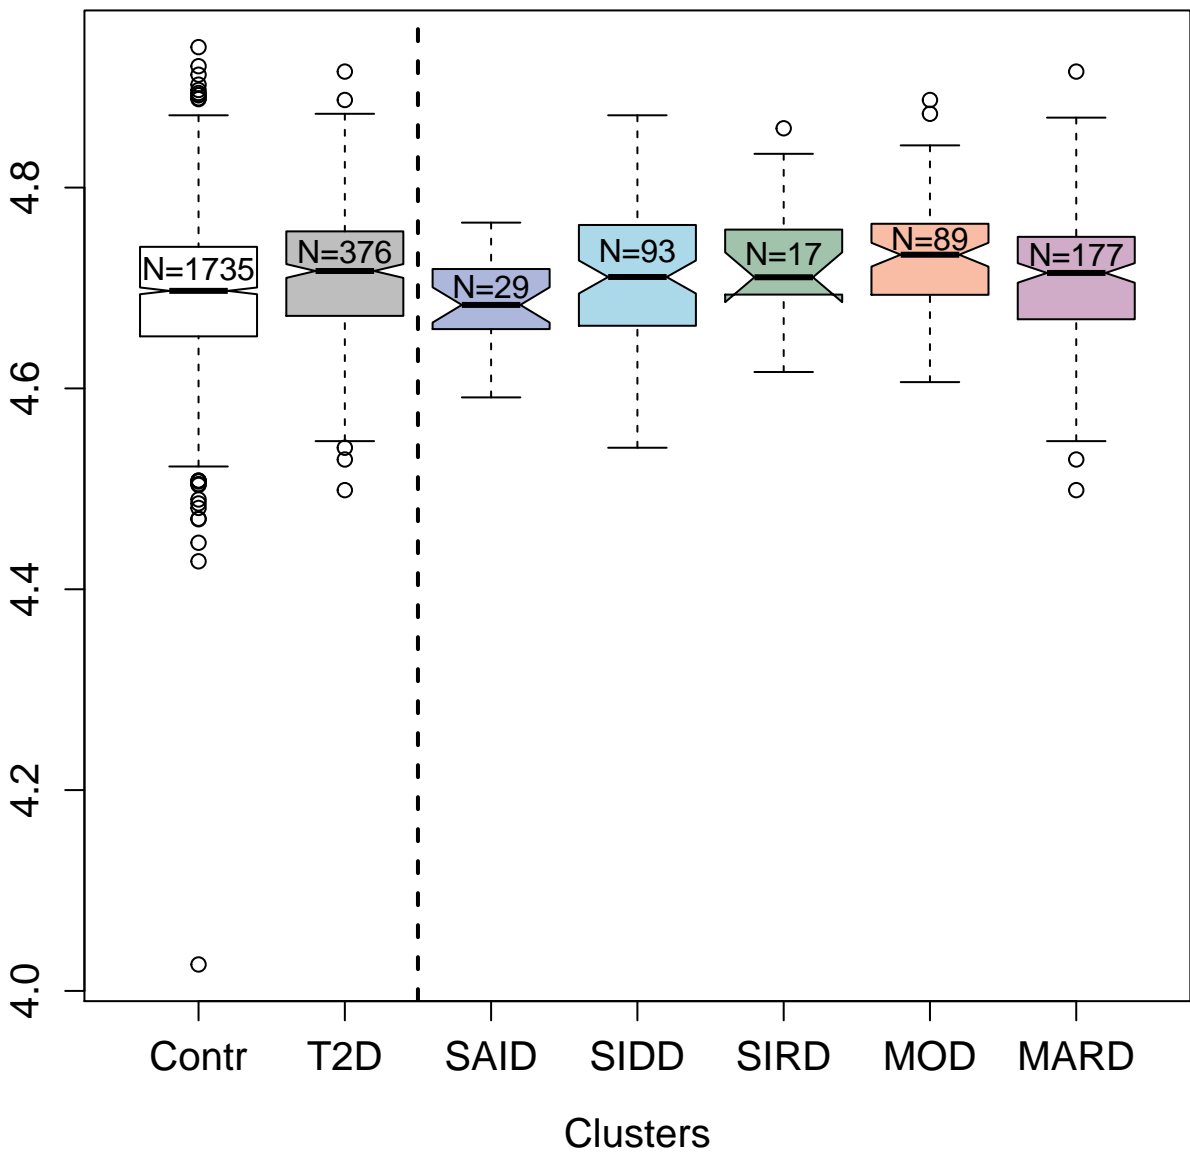

2987-37\_3 : Histone H1.2

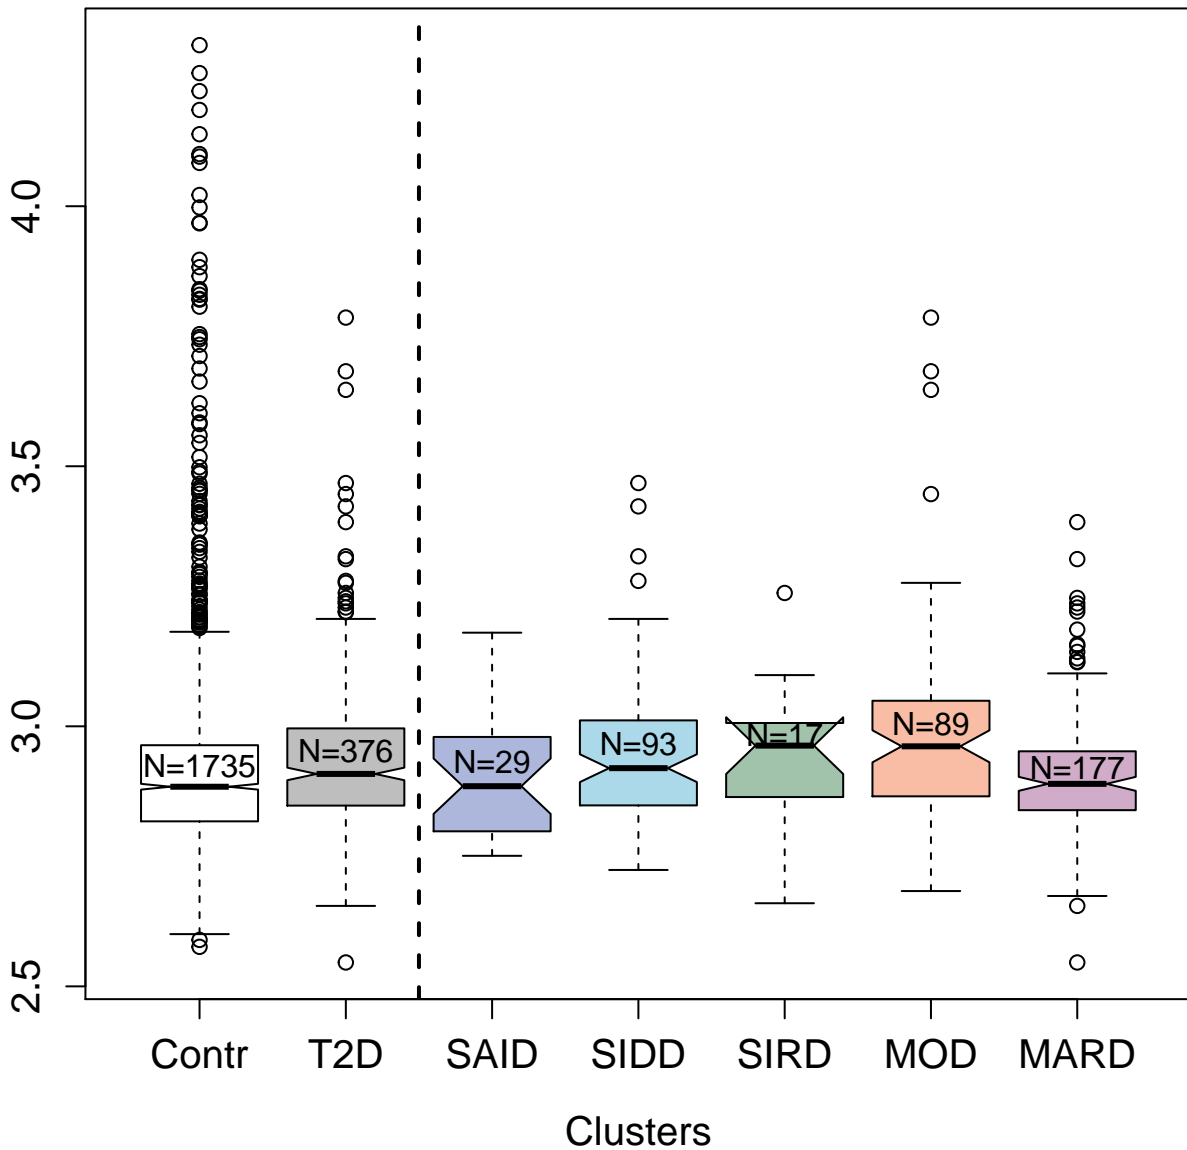

4914-10\_1 : Human Chorionic Gonadotropin

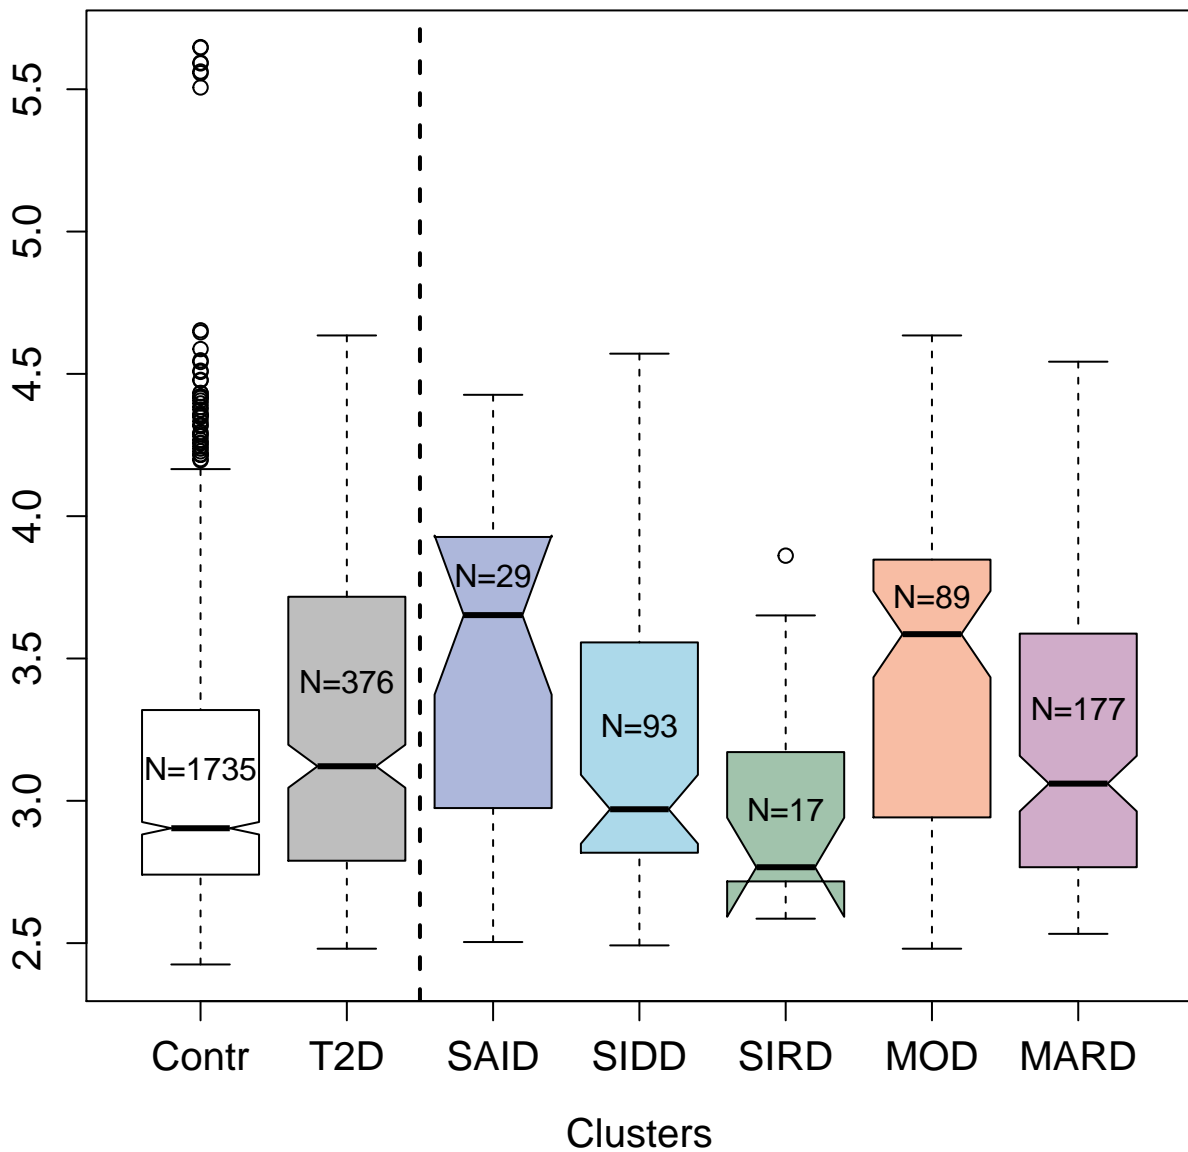

11101-18\_3: Toll-like receptor 4

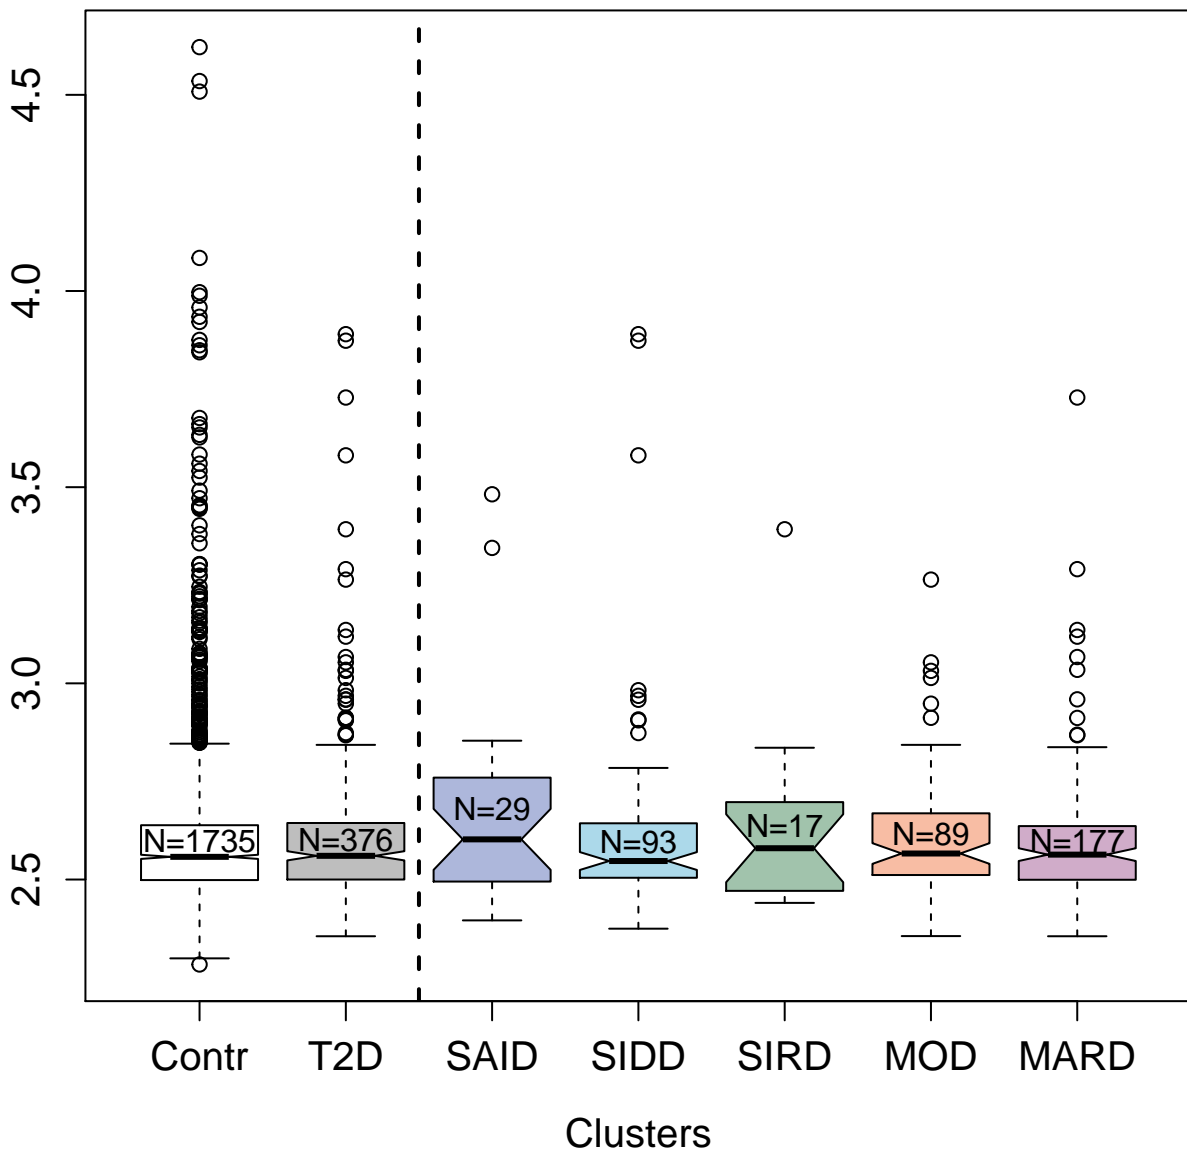



3727-35\_1 : Peptide YY

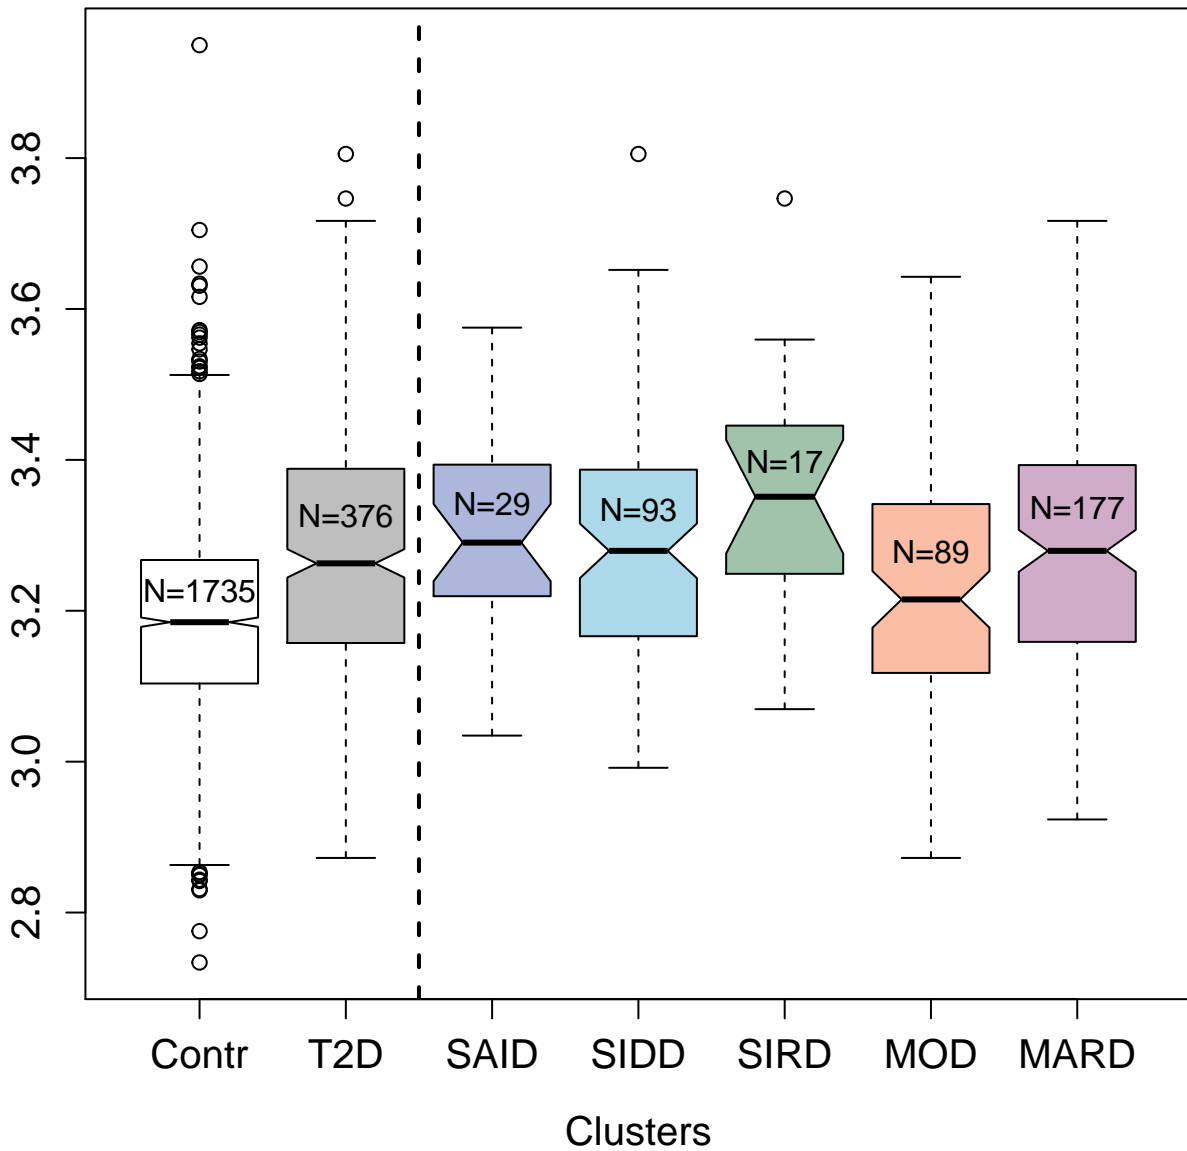

2859-69\_2 : Histone deacetylase 8

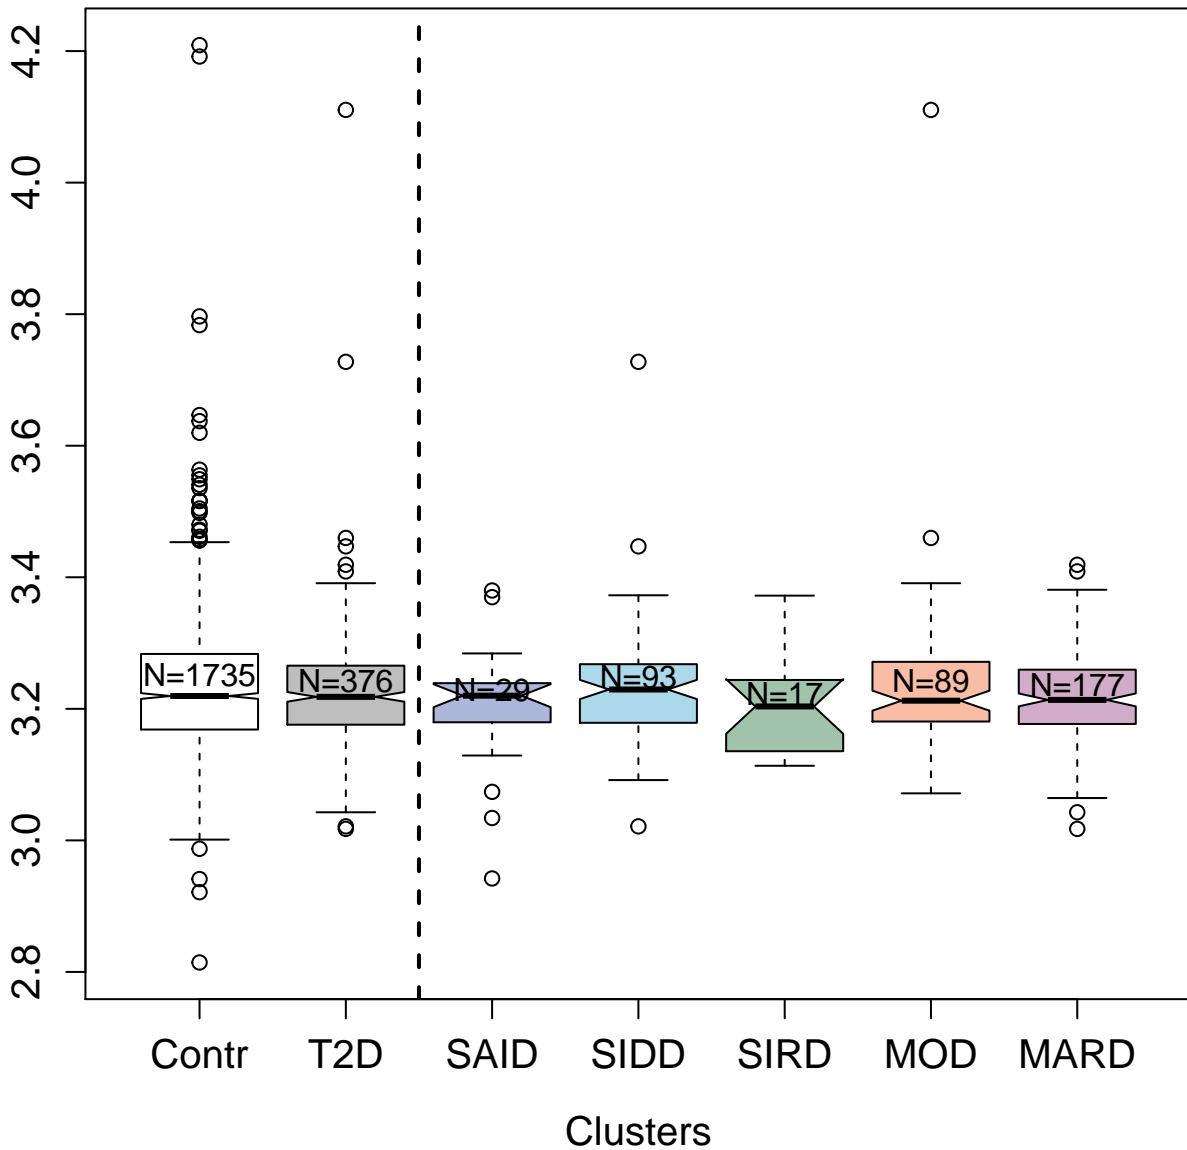

3206-4\_2 : Lymphatic vessel endothelial  
hyaluronic acid receptor 1

2.0 2.5 3.0 3.5

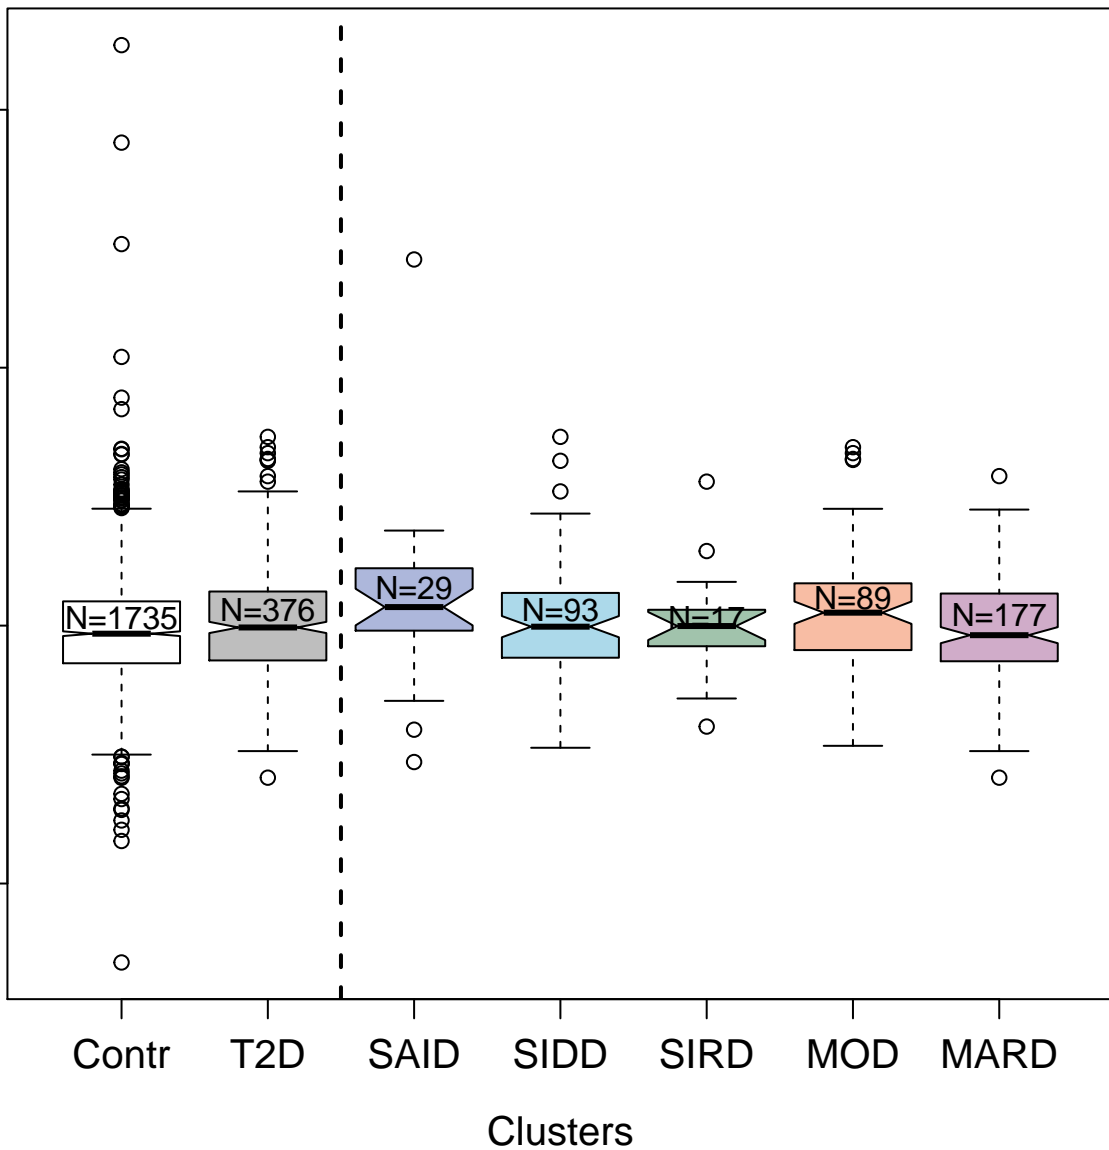

4153-11\_2 : Alpha-1-antichymotrypsin complex

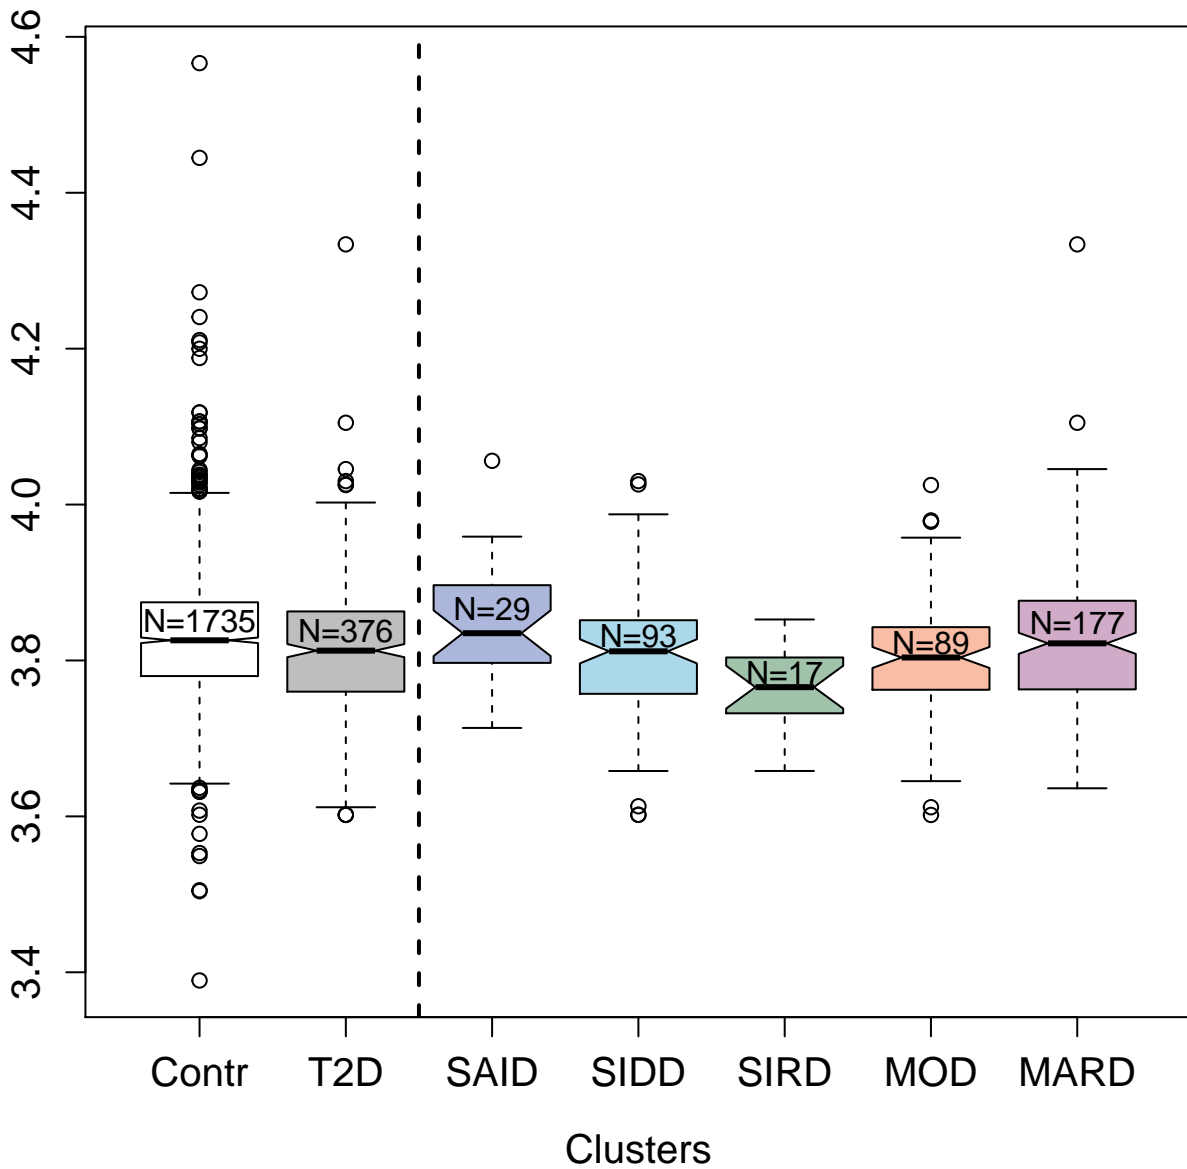

3432-21\_2 : Ephrin type-A receptor 3

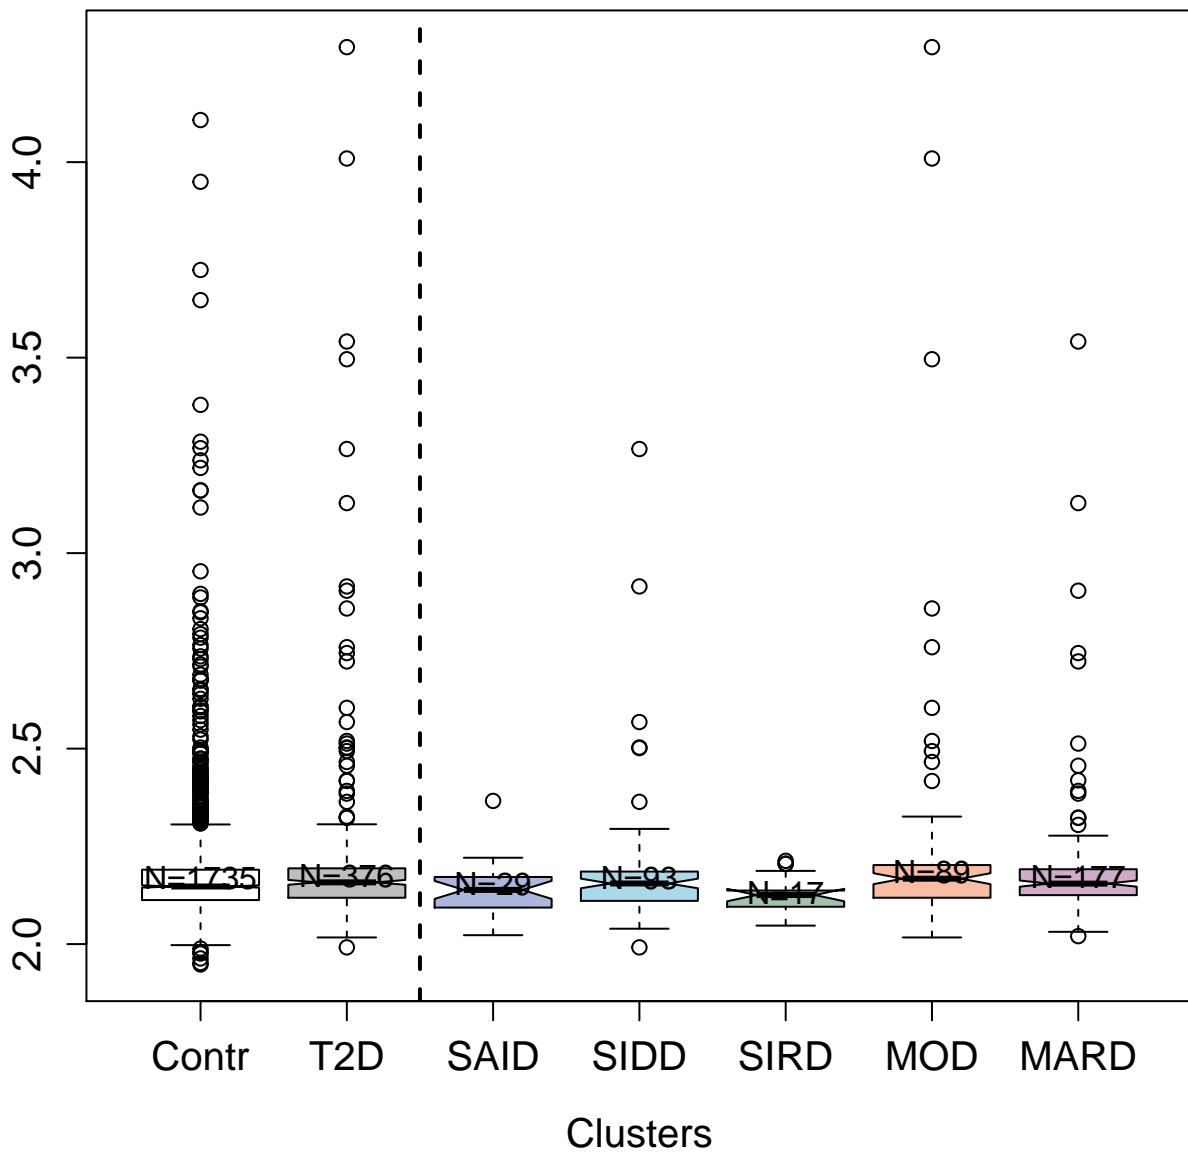

2976-58\_2 : Desmoglein-1

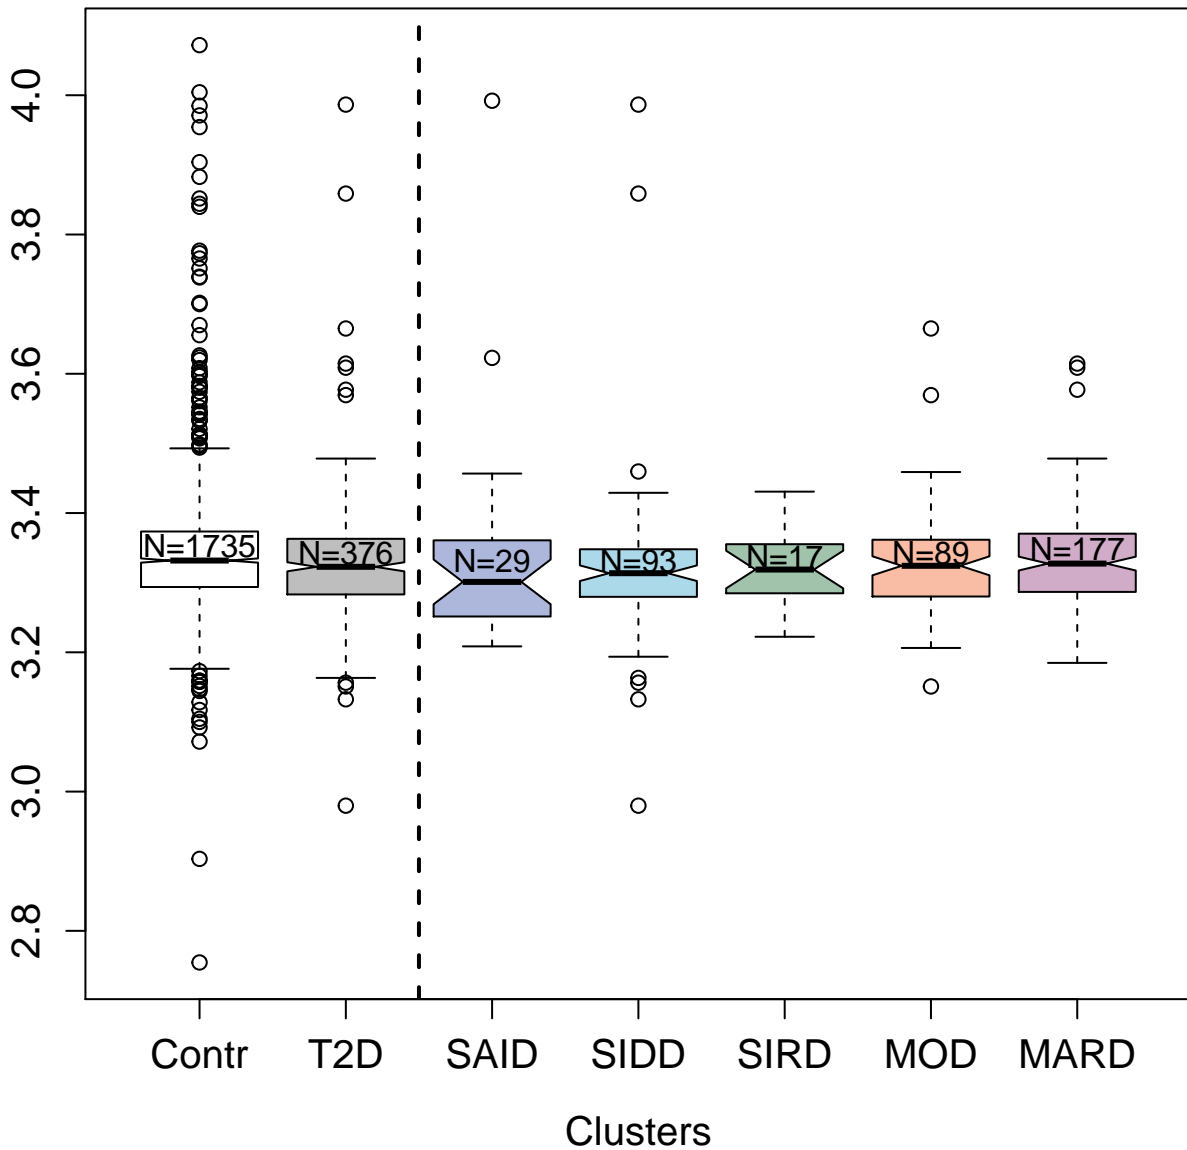

3644-5\_4 : Dickkopf-like protein 1

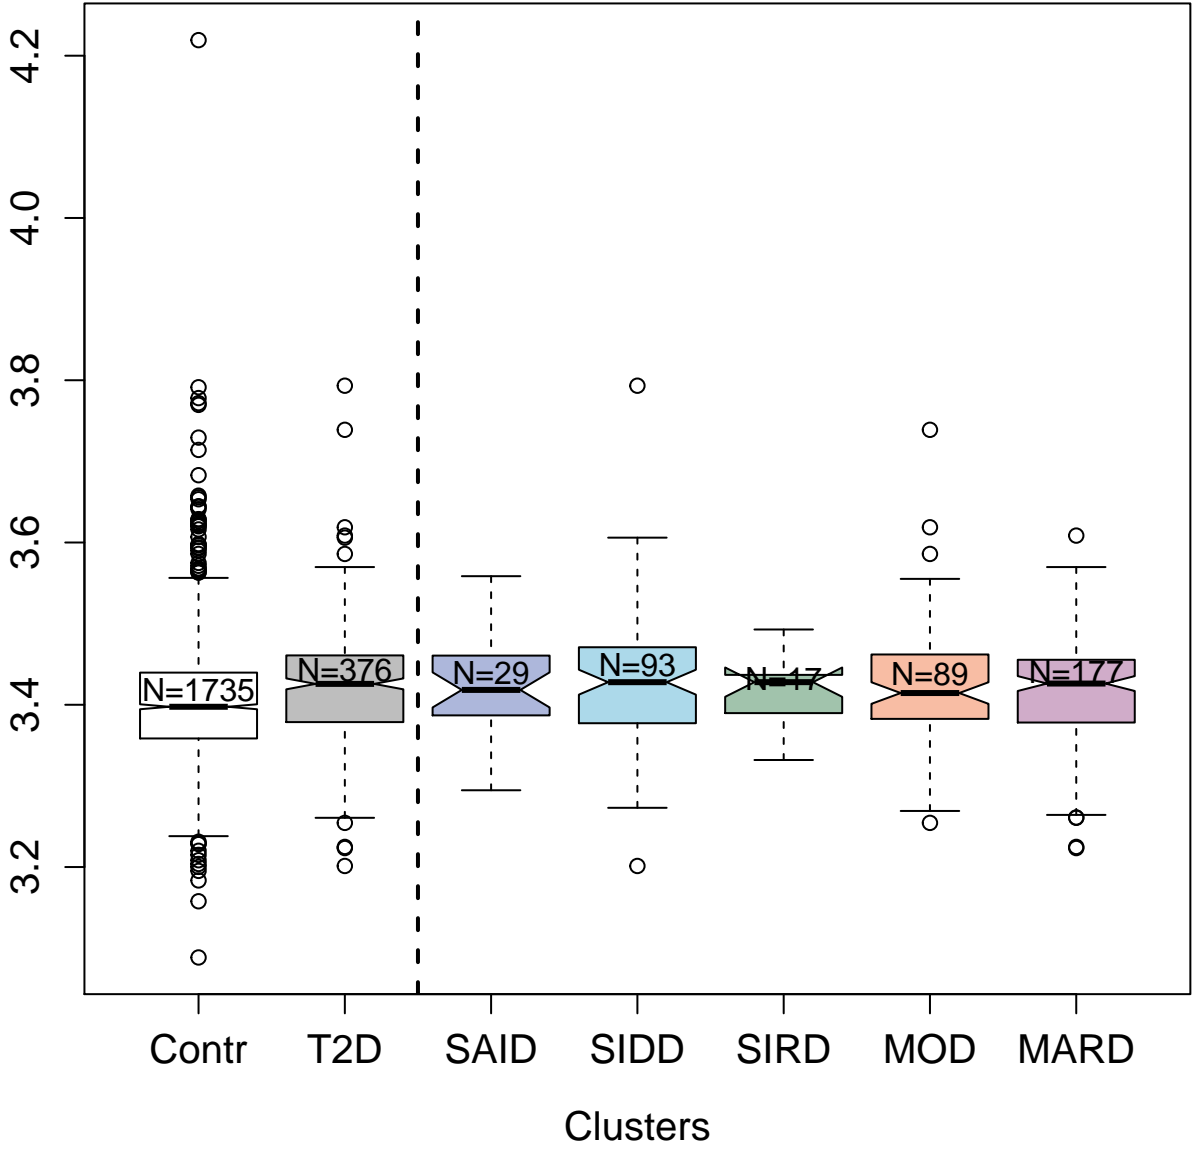





5452-71\_3 : Asialoglycoprotein receptor 1

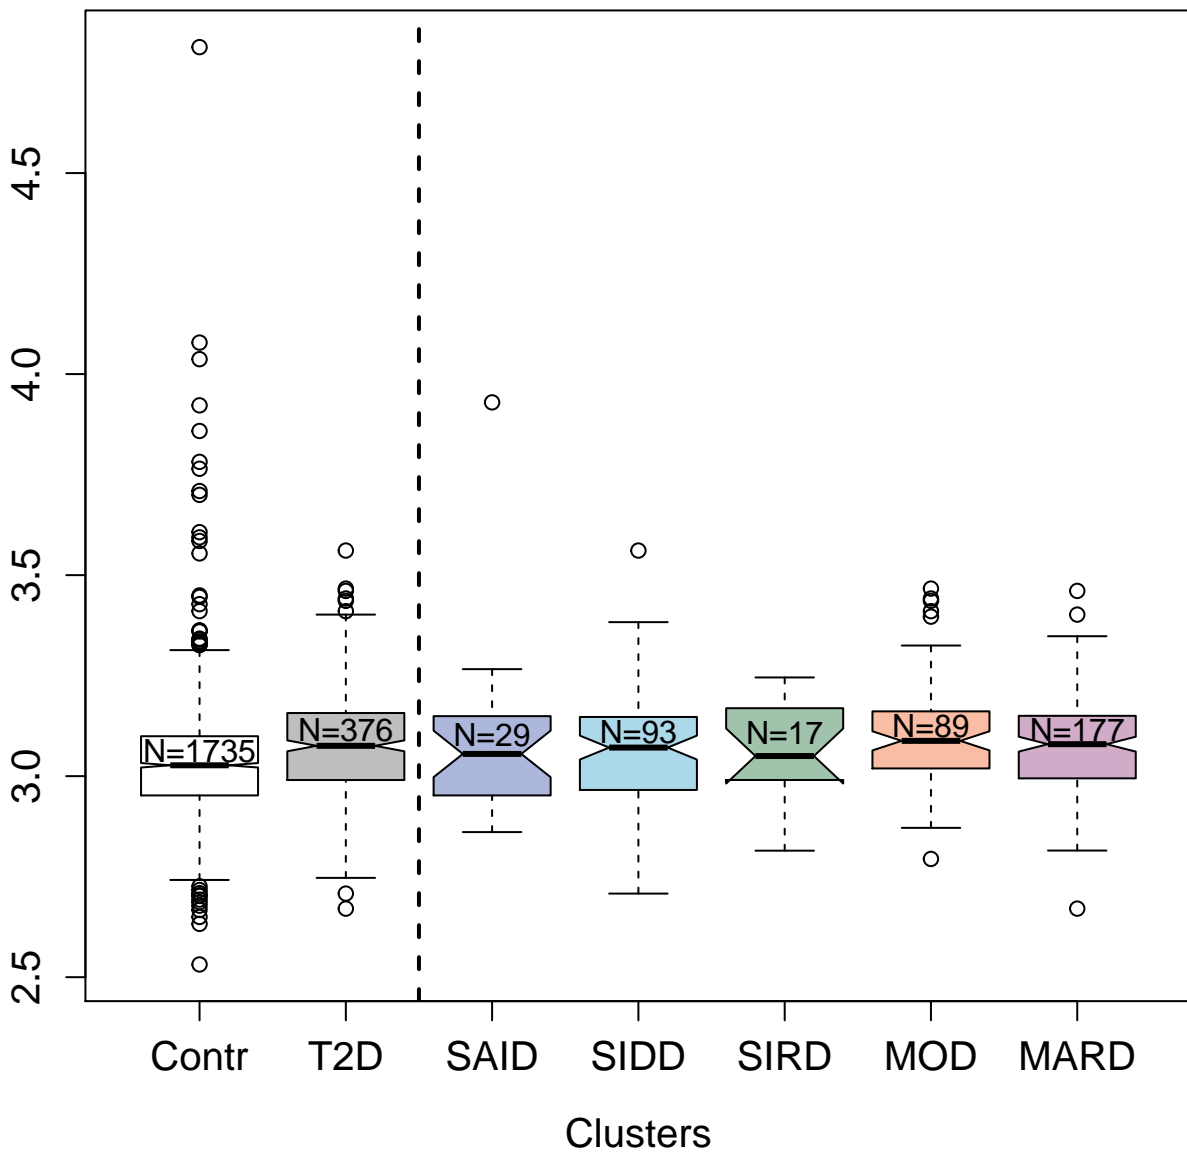

5490-53\_3: Testican-1

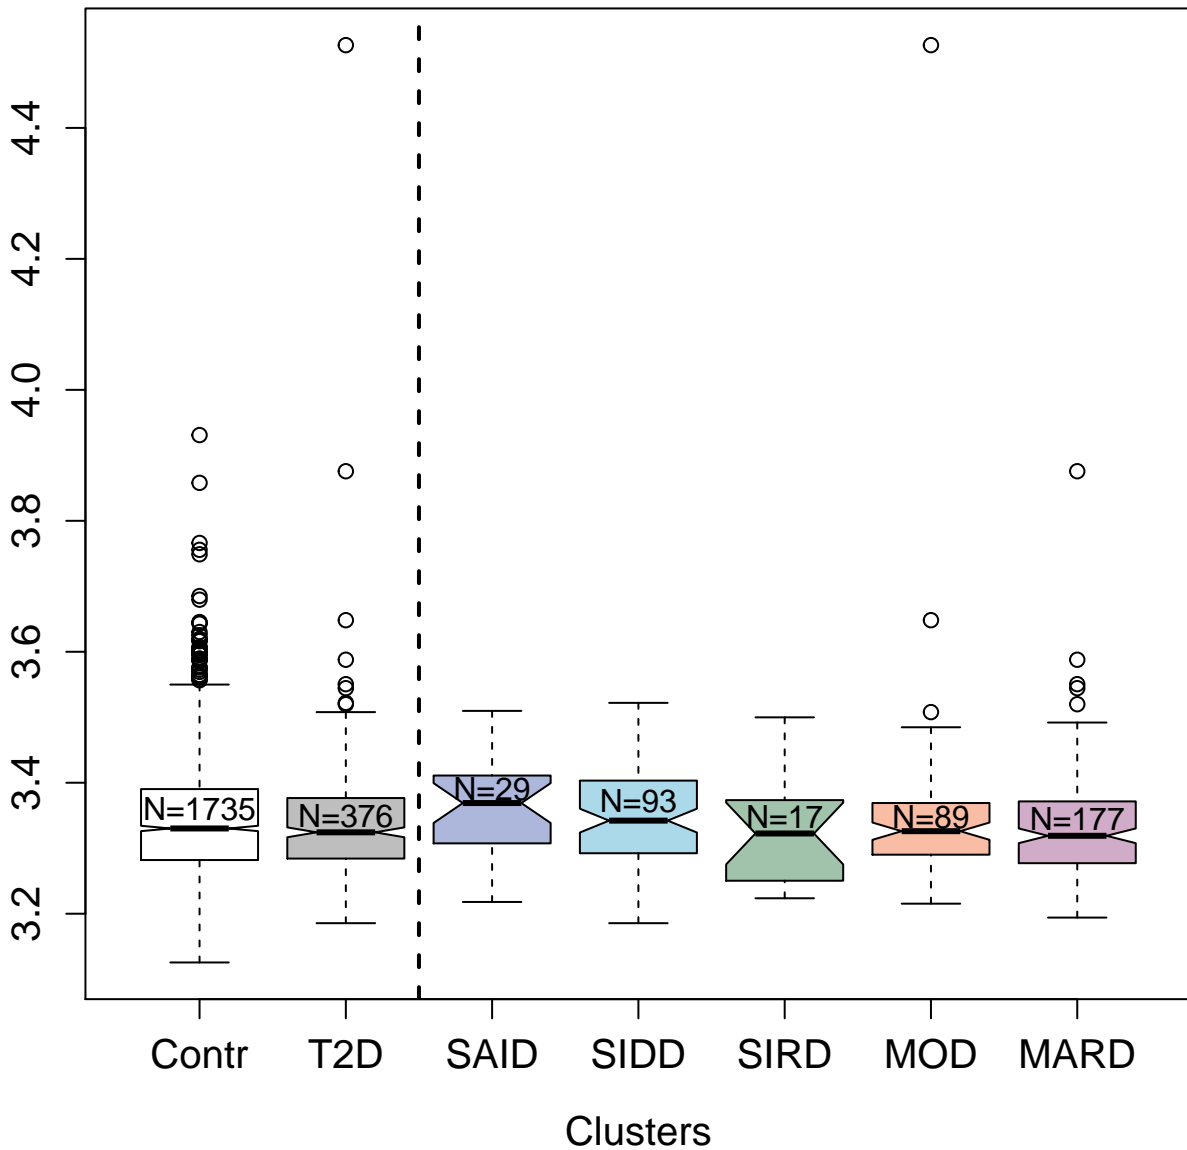

5228-25\_2 : Kinesin-like protein KIF23

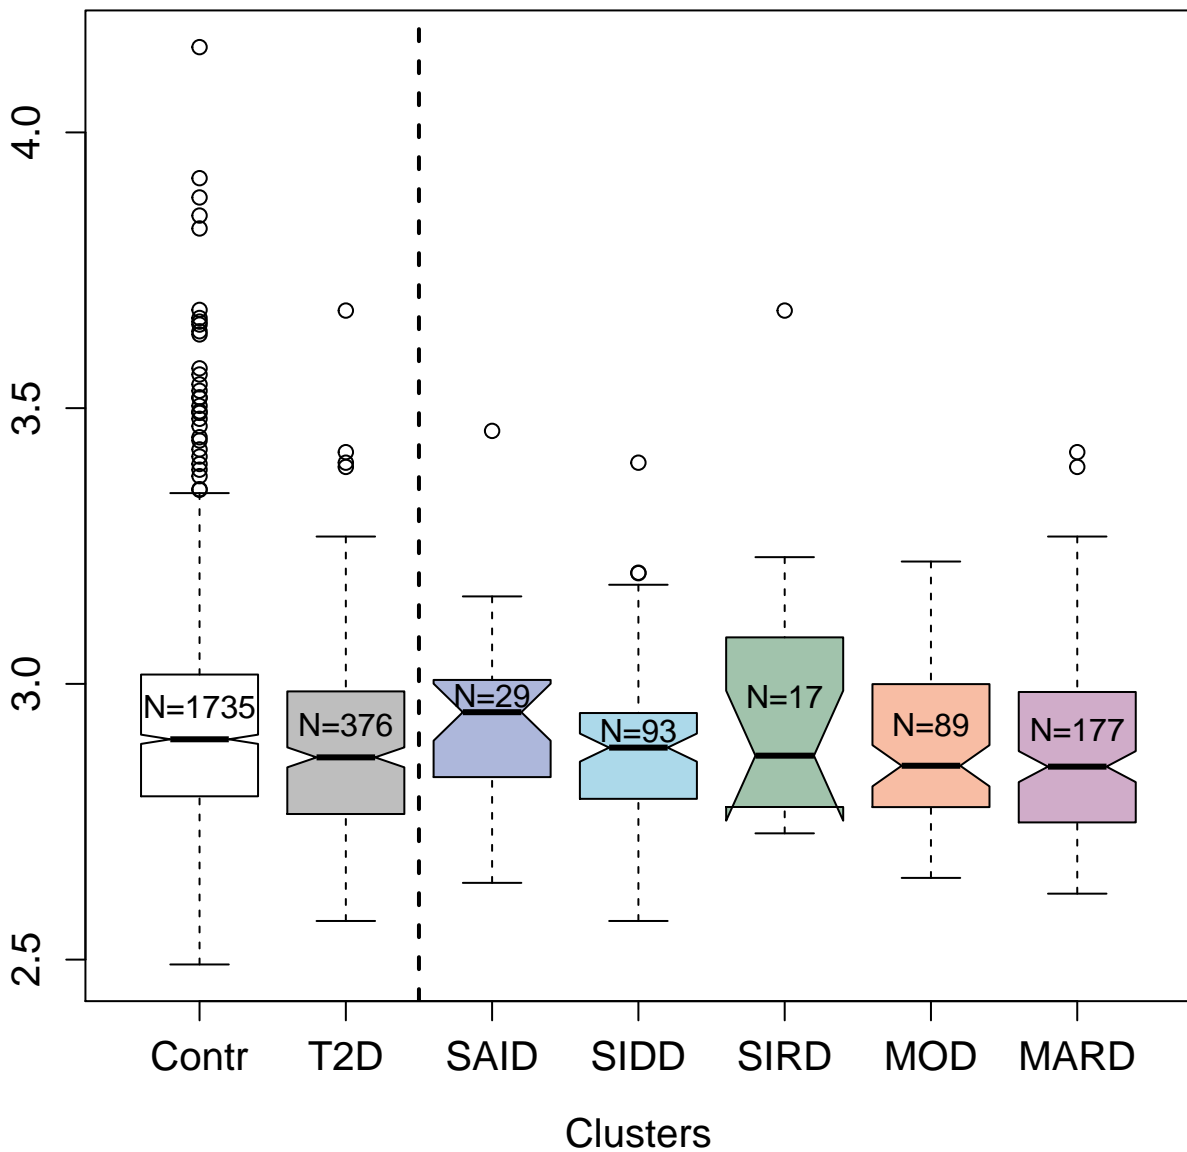

2761-49\_2 : Fibroblast growth factor 18

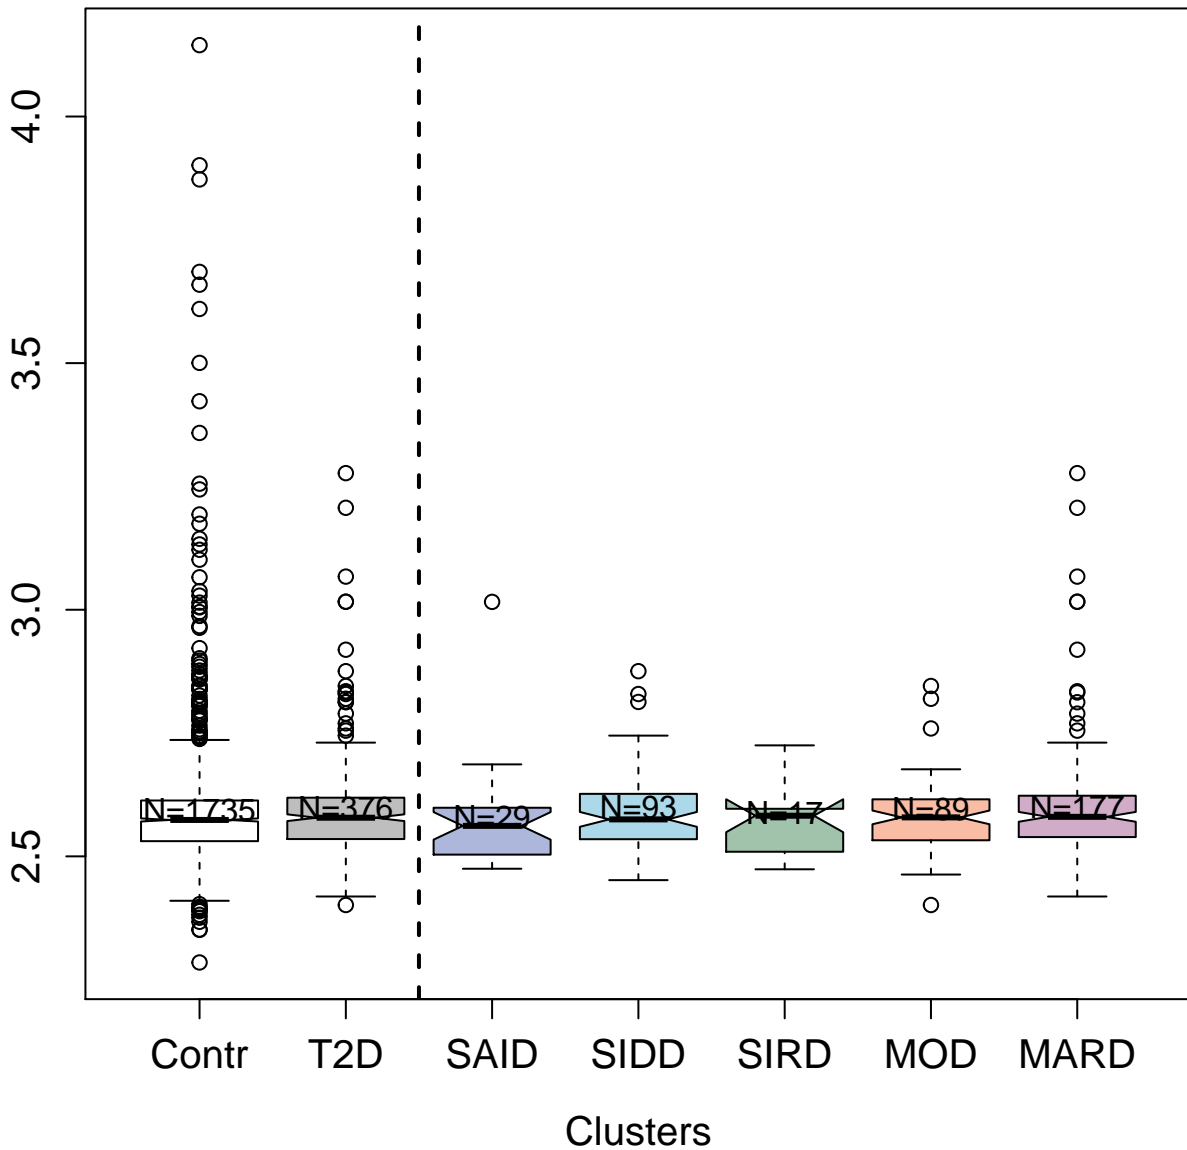

# 5104-57\_3 : Natural cytotoxicity triggering receptor 1

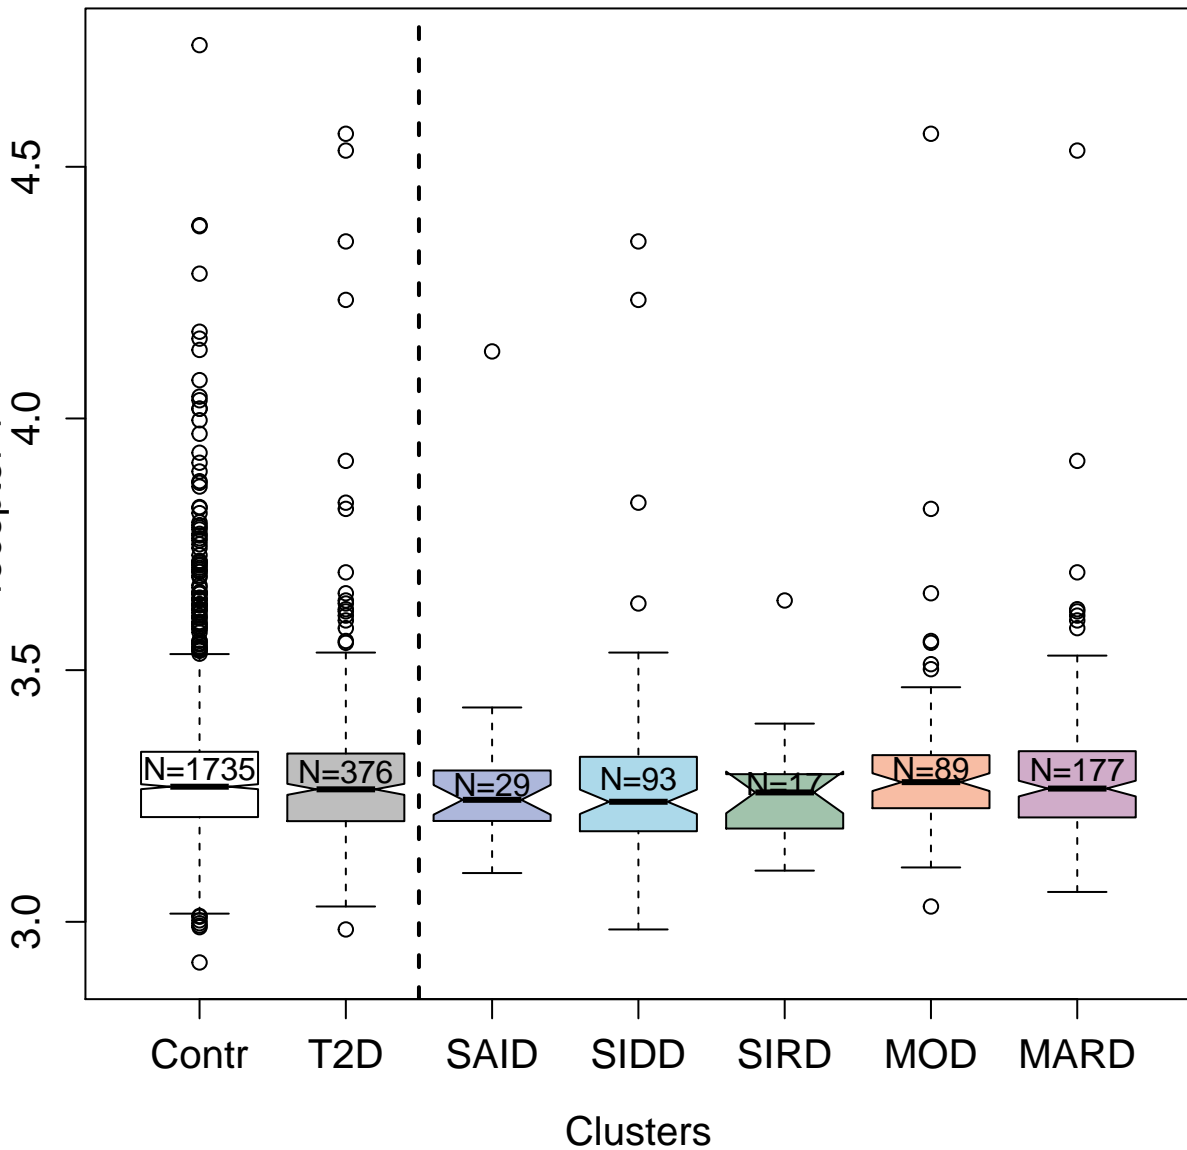

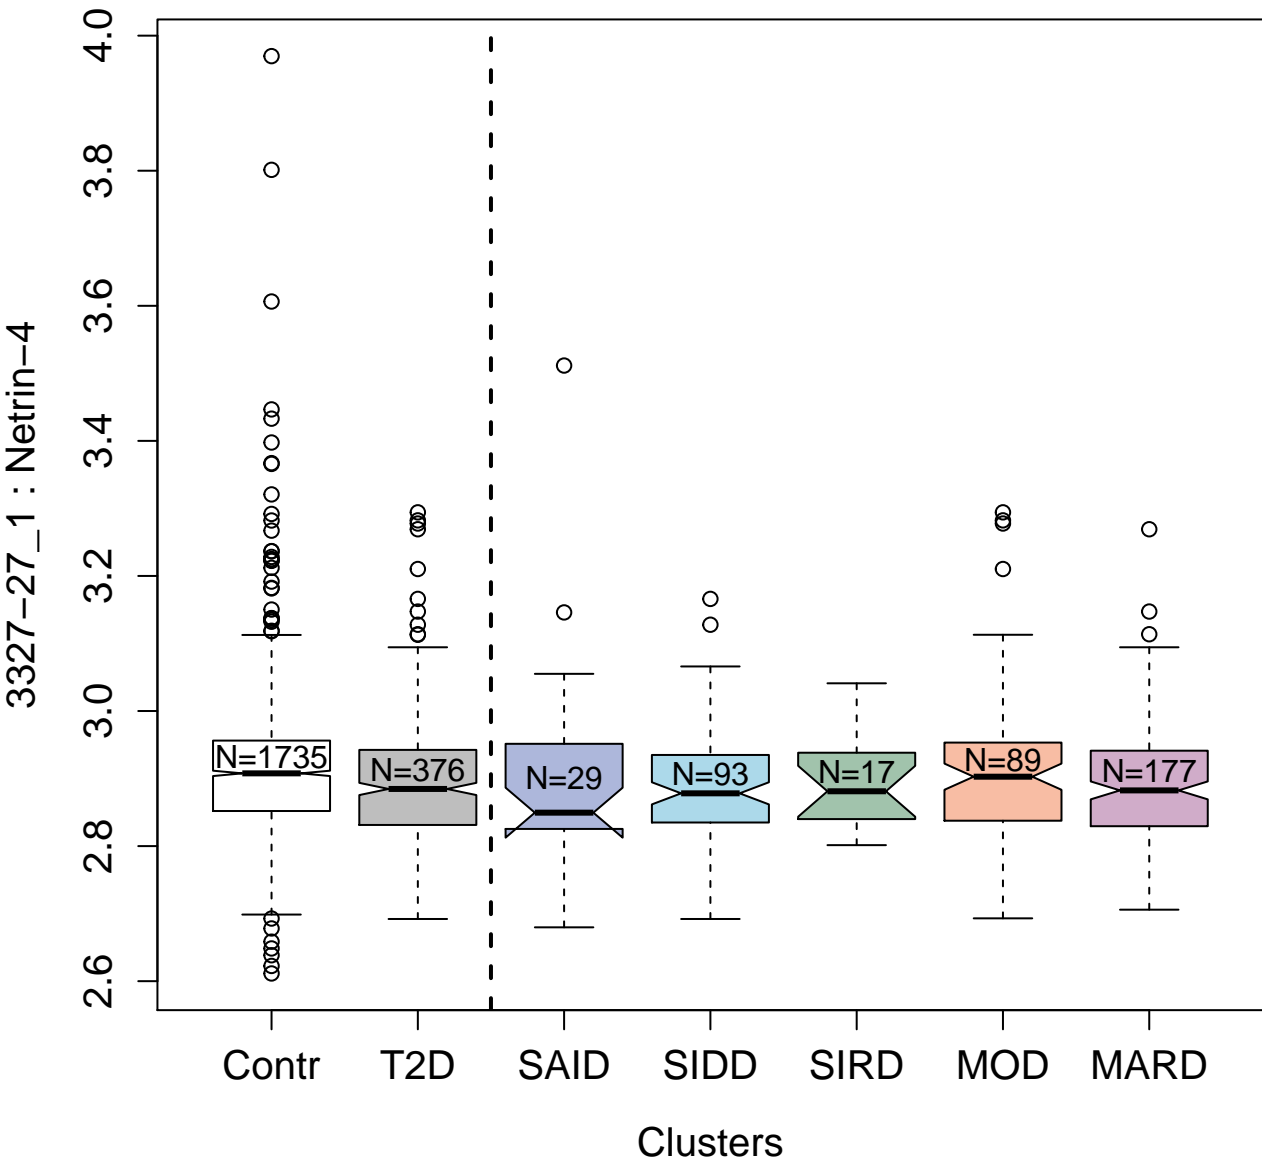

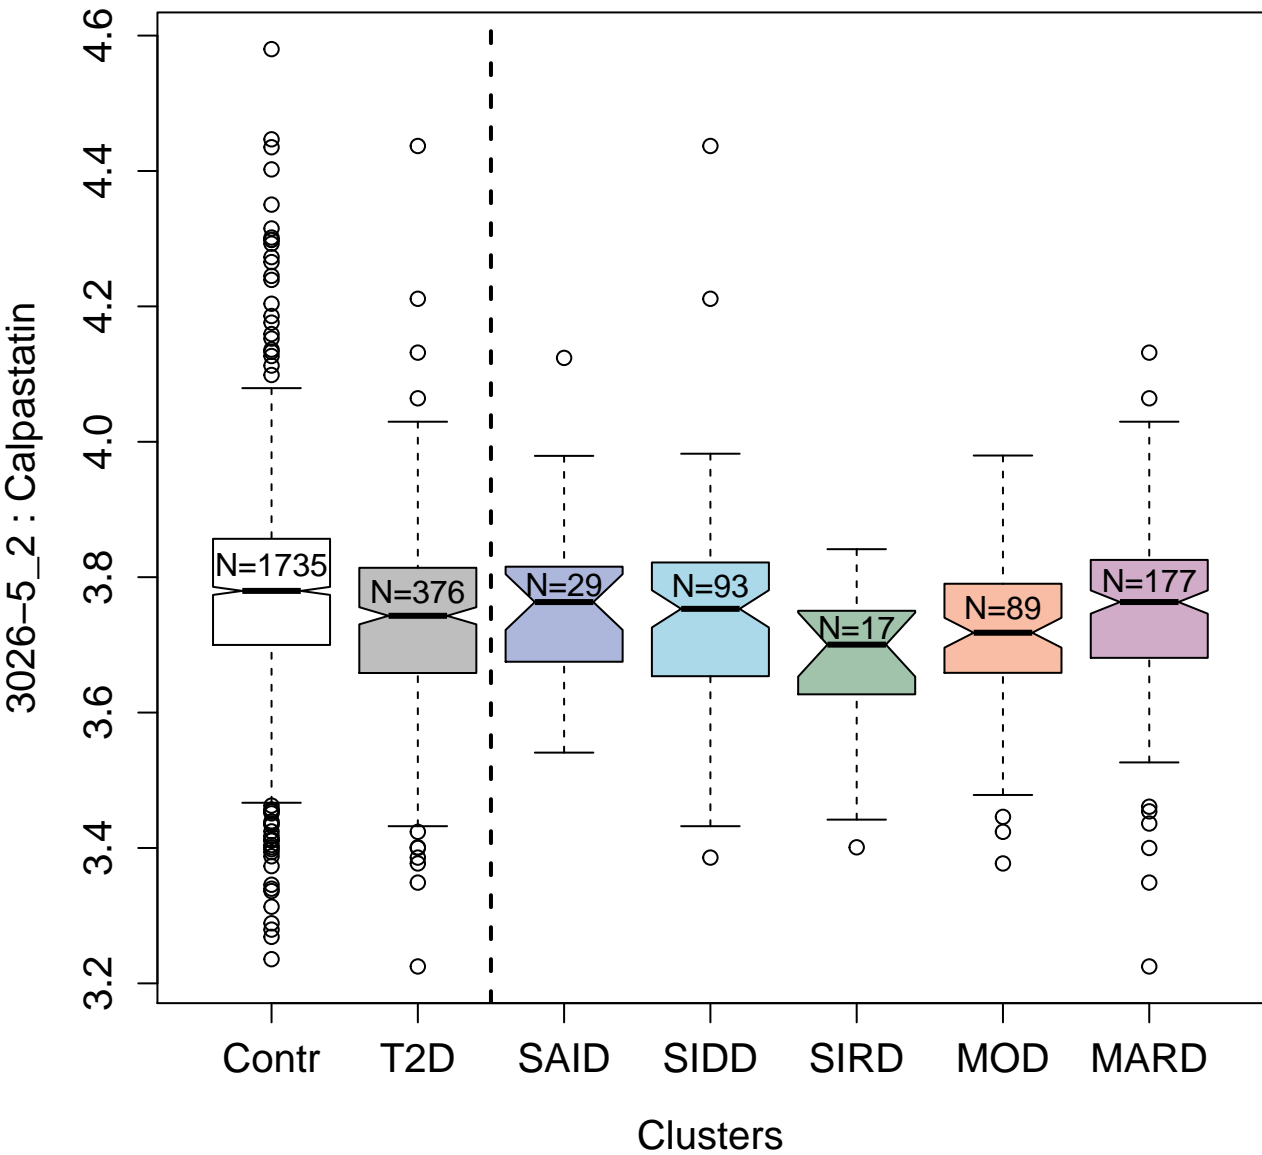

10361-25\_3 : 2'-5'-oligoadenylate synthase 1

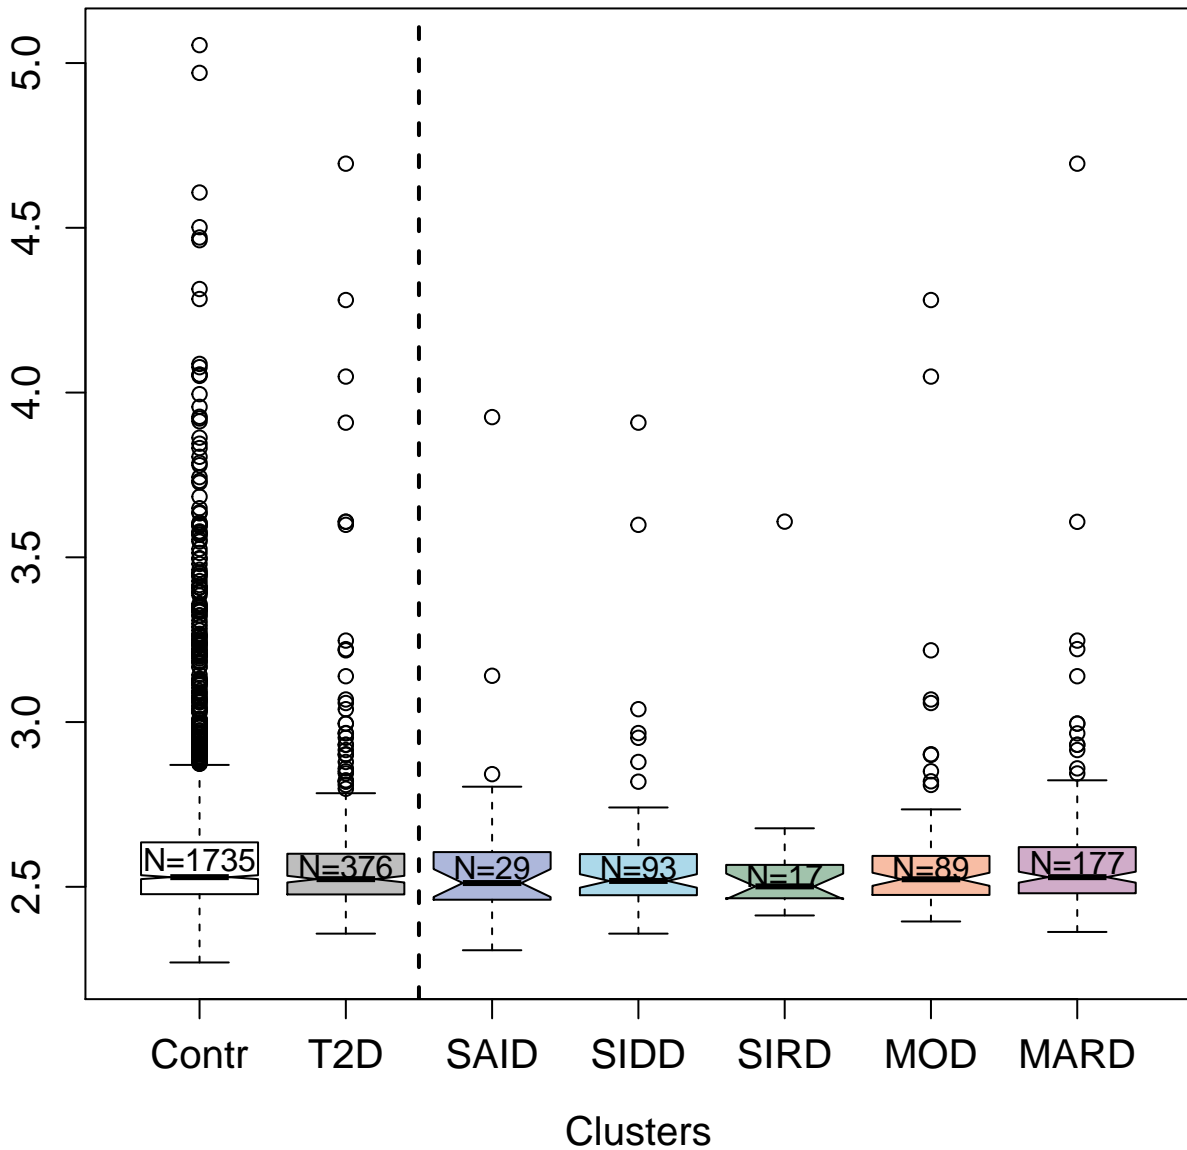



2683-1\_2 : Complement C3b; inactivated

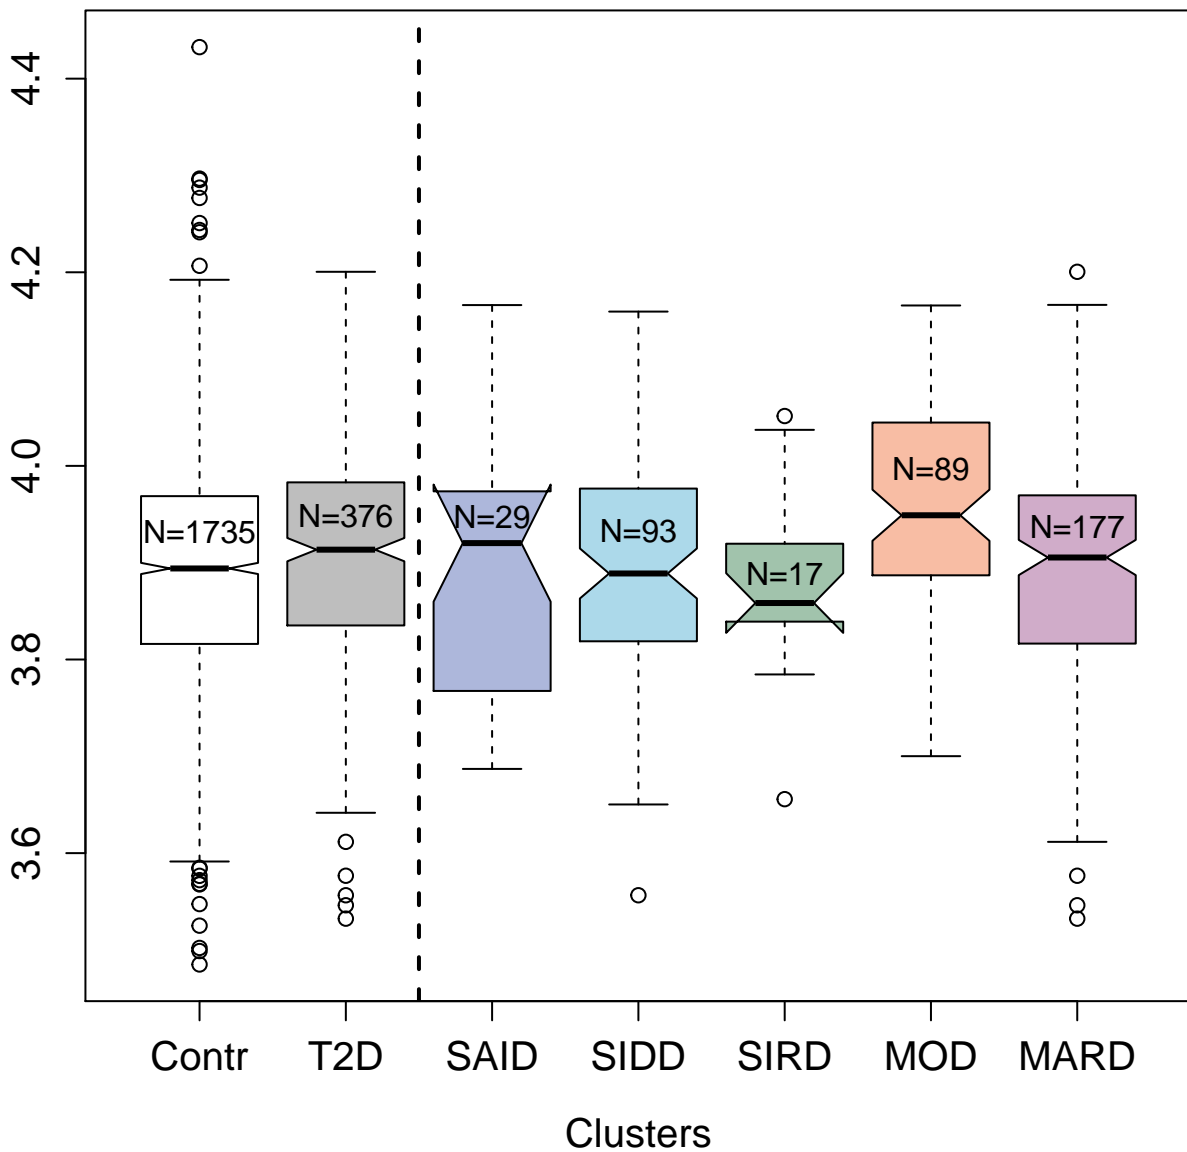



11102-22\_3 : Regenerating islet-derived protein 4

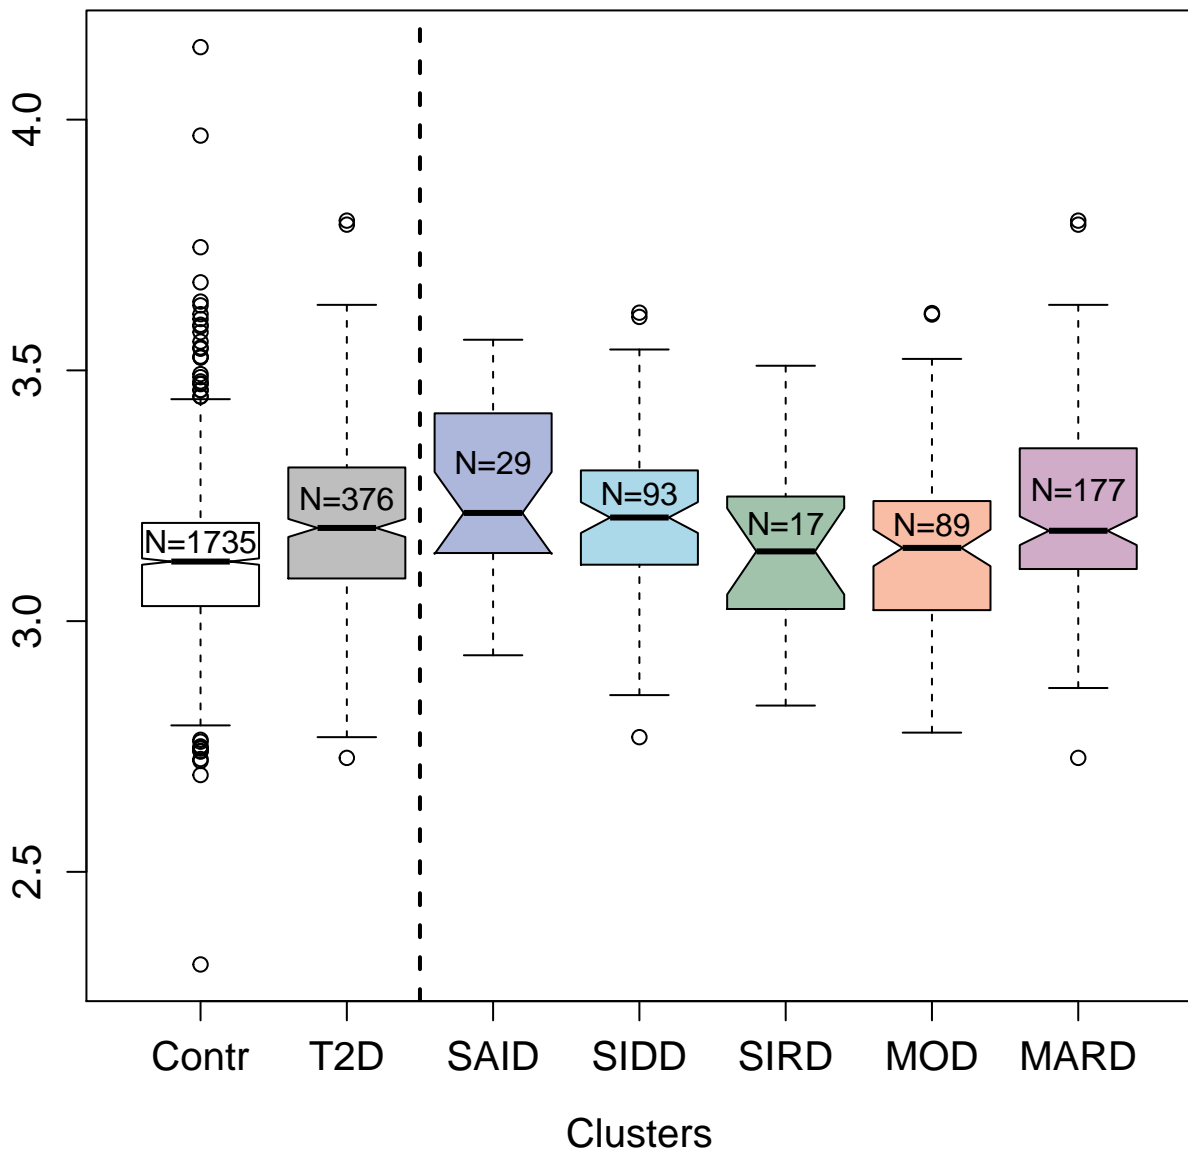

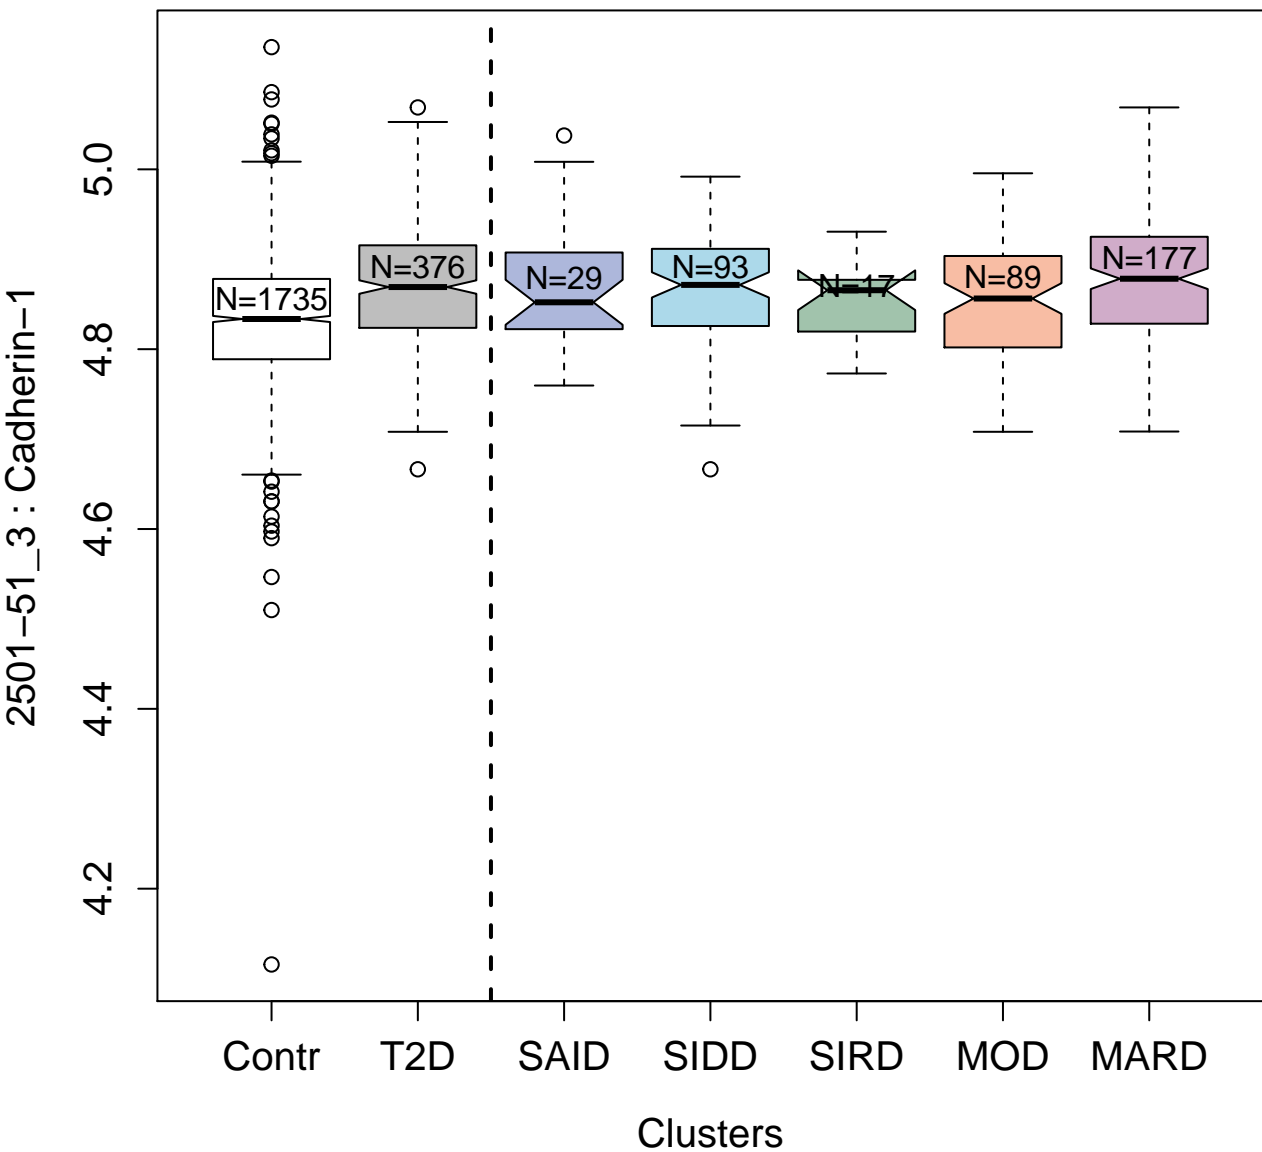

3898-5\_2 : 26S proteasome non-ATPase regulatory subunit 7

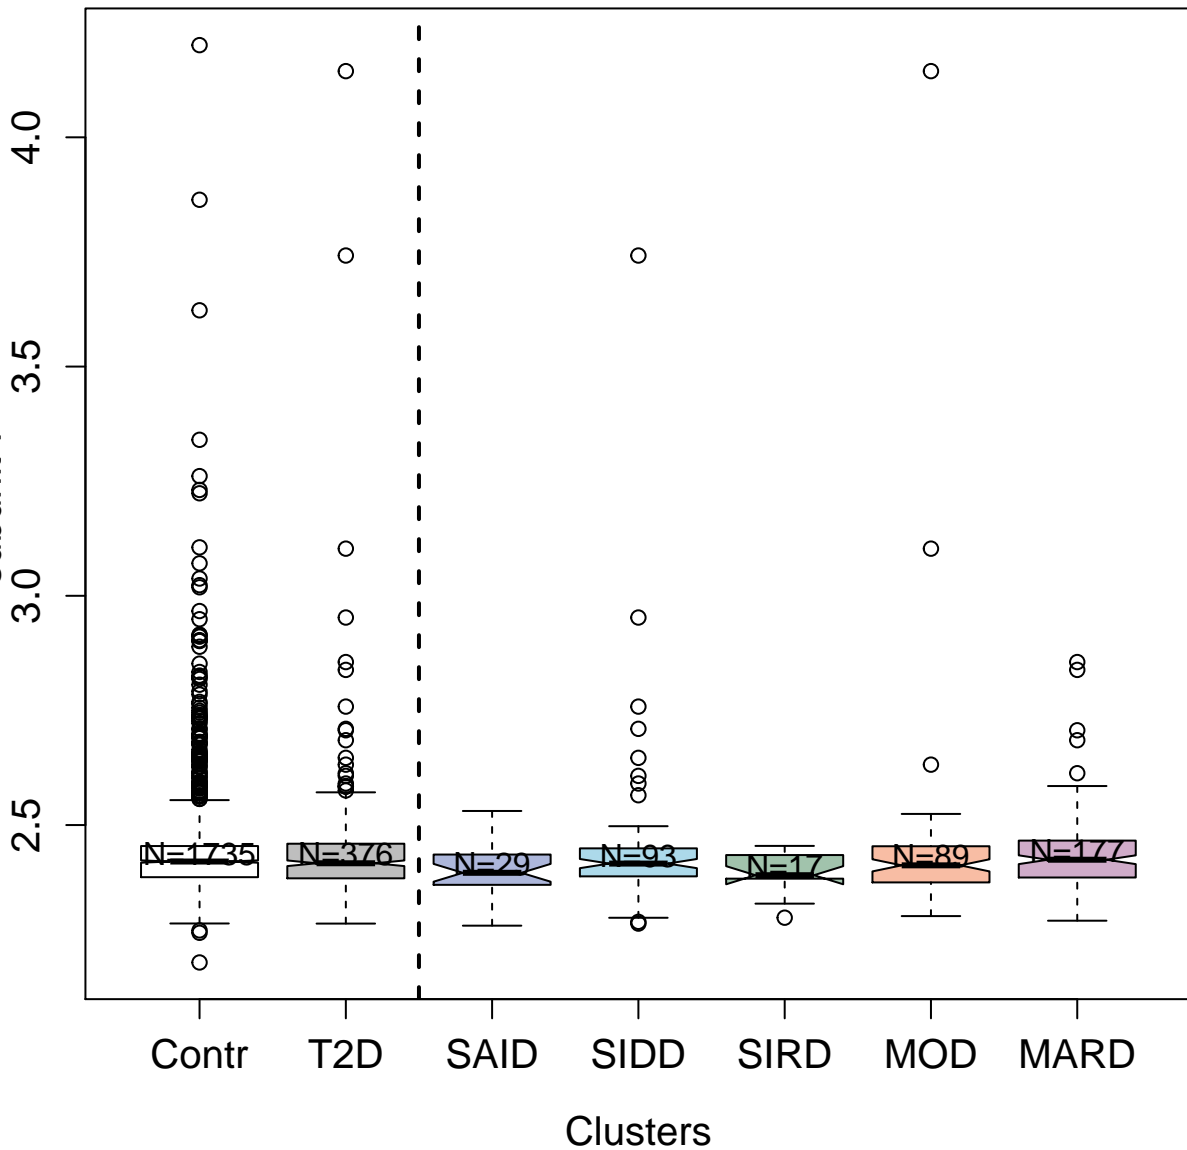

4995-16\_1 : 15-hydroxyprostaglandin dehydrogenase

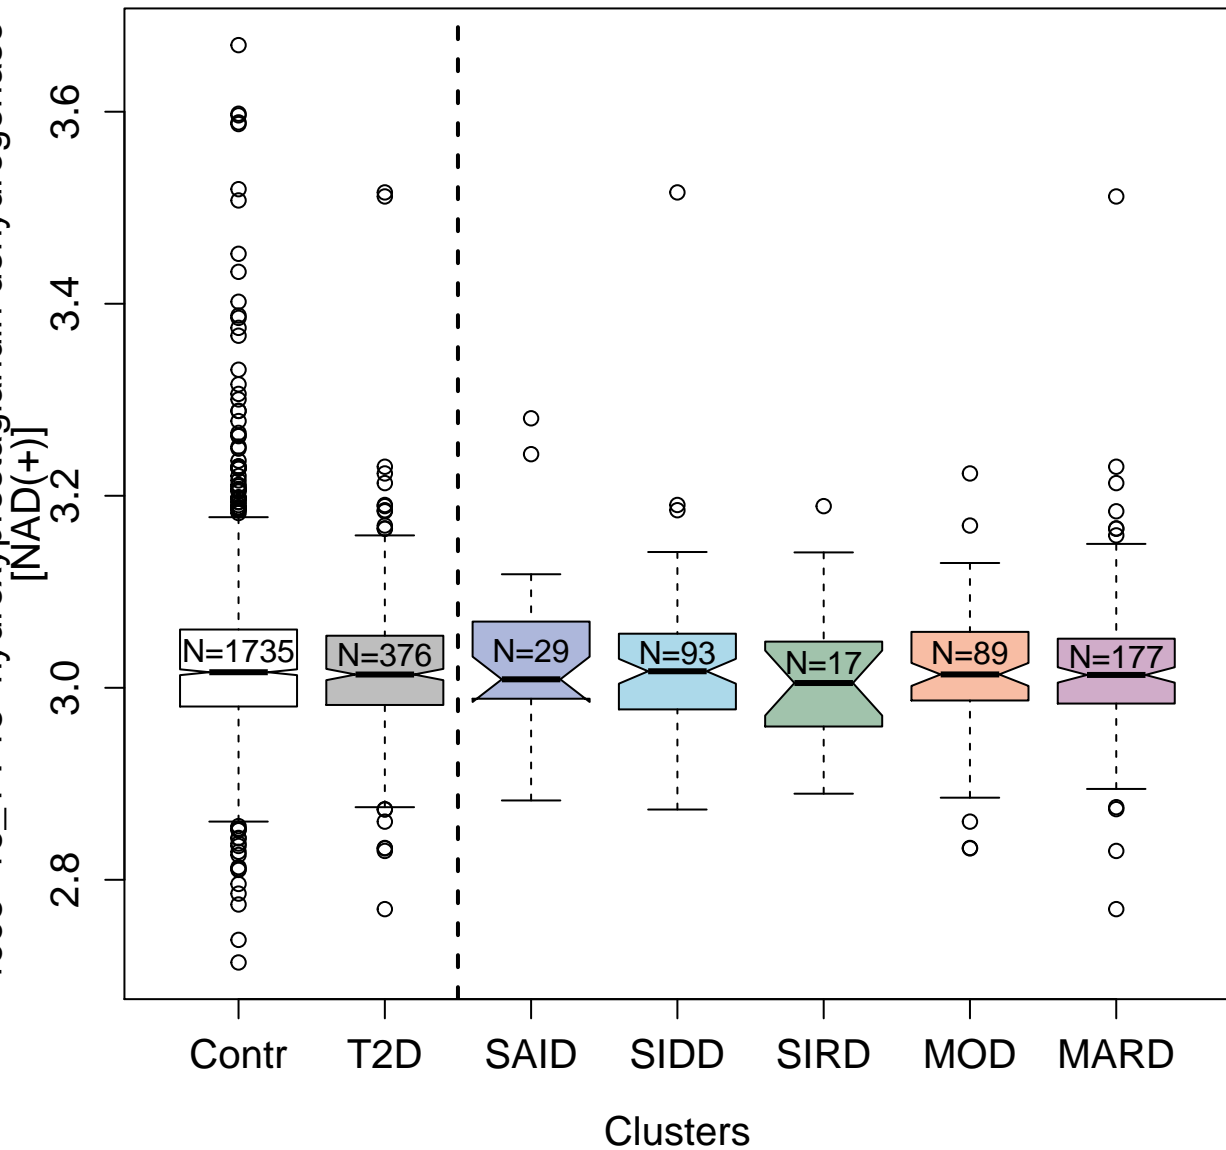

13116-25\_3 : CD177 antigen

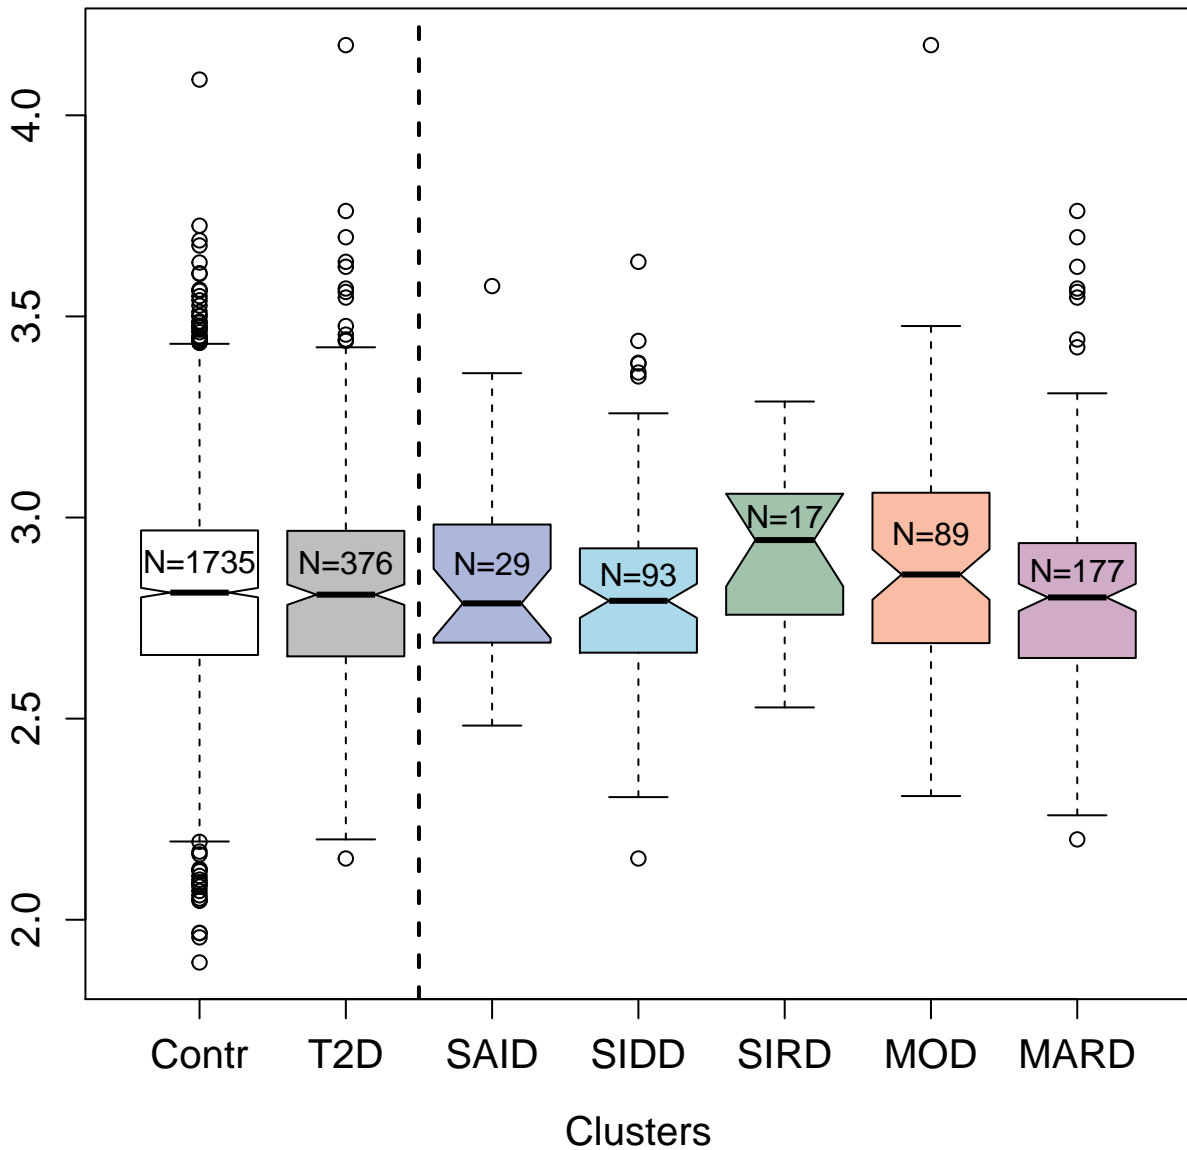

5125-6\_3 : Sialic acid-binding Ig-like lectin 14

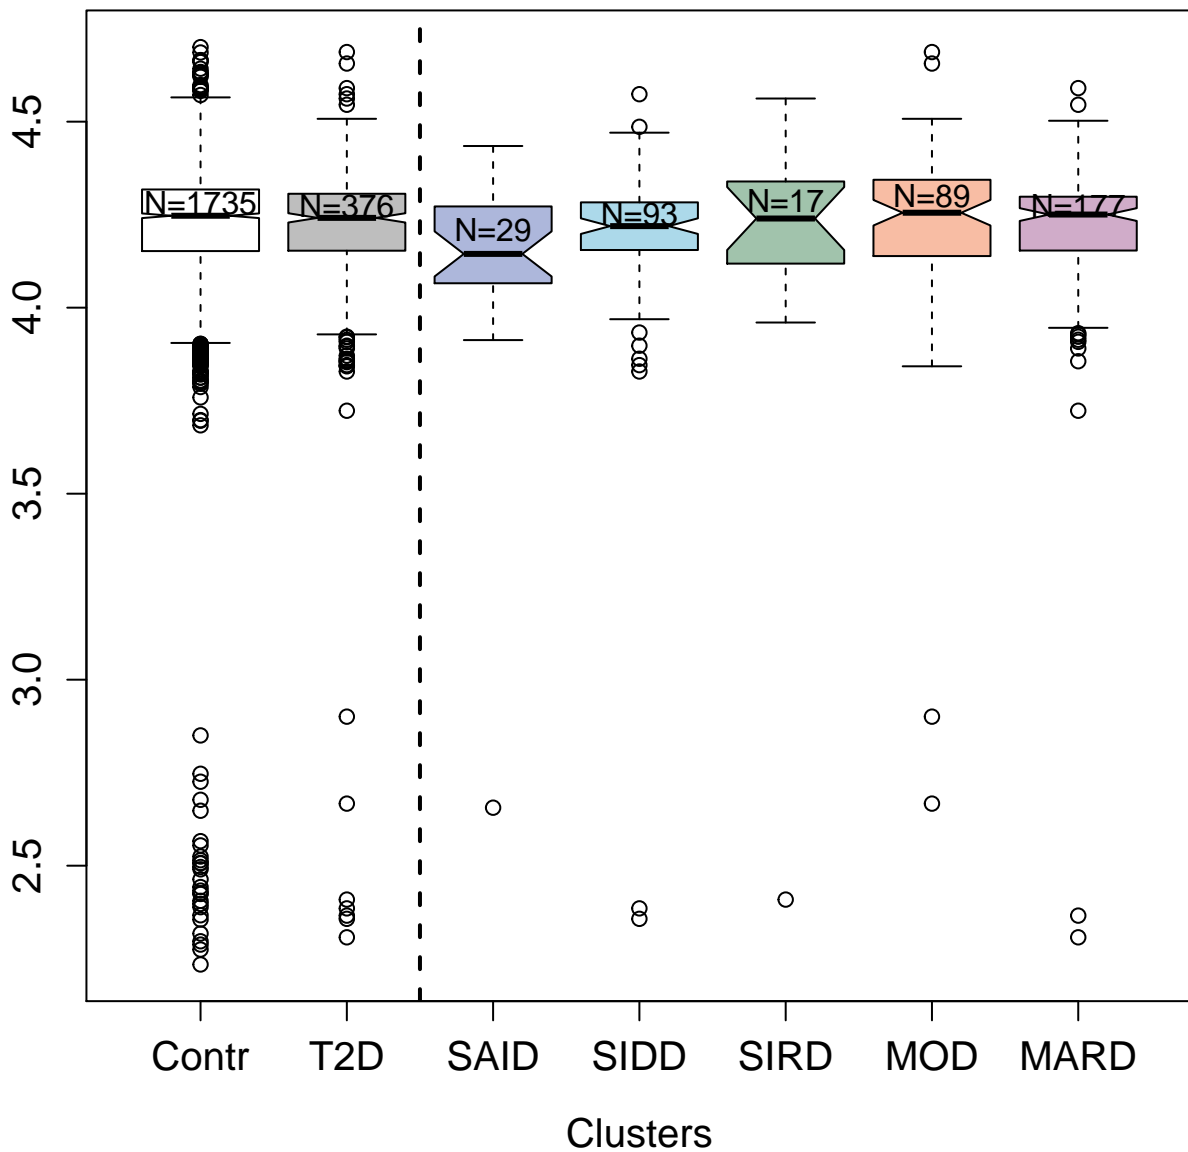



4916-2\_1 : Immunoglobulin D

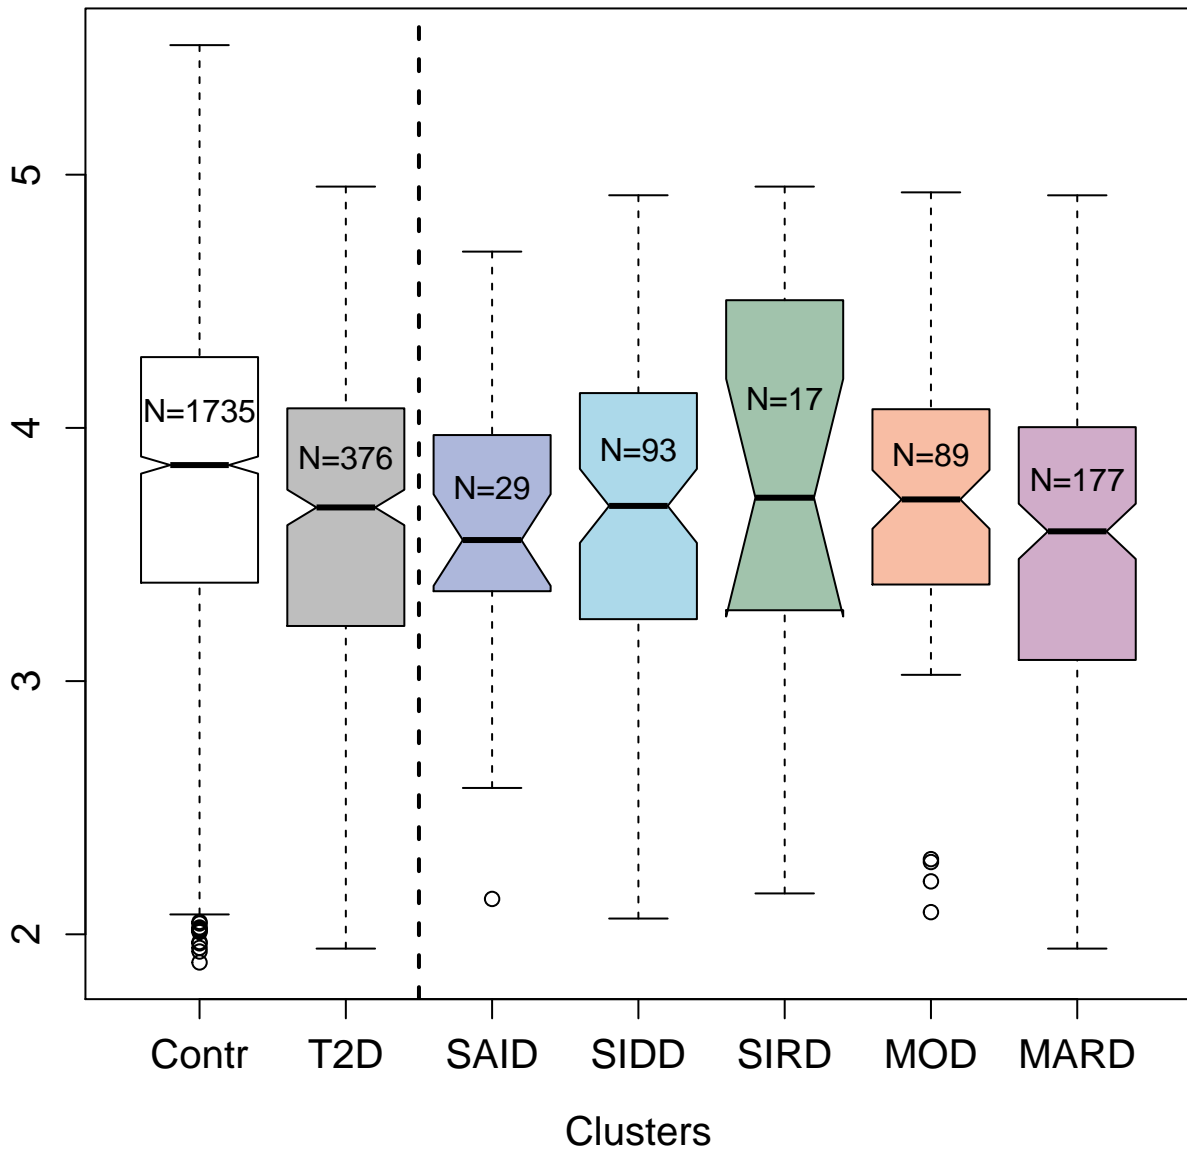

2992-59\_2 : Interleukin-17 receptor A

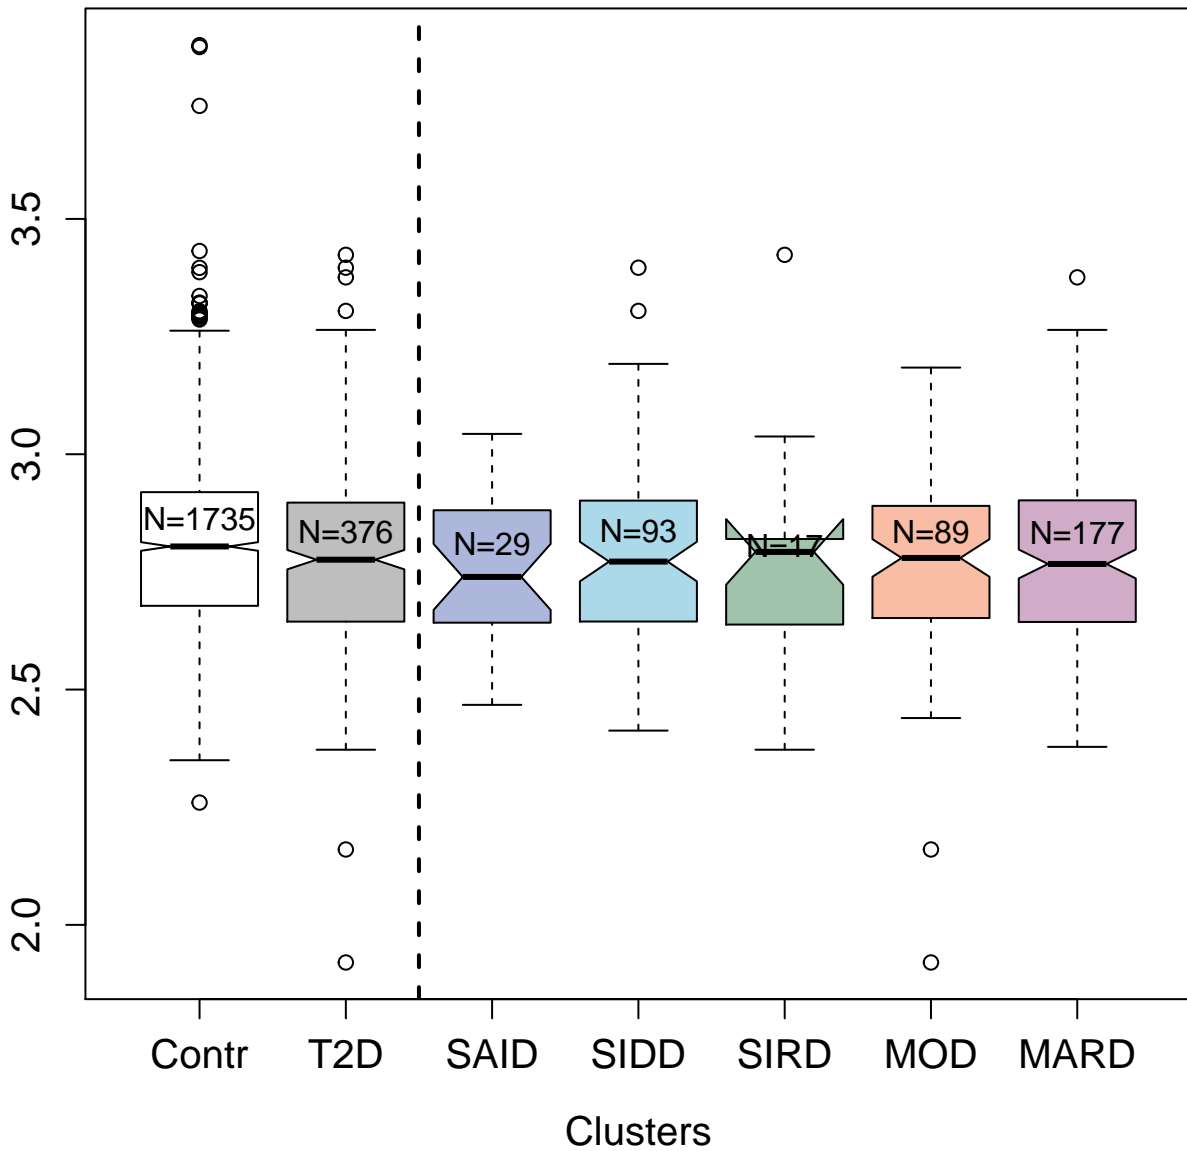

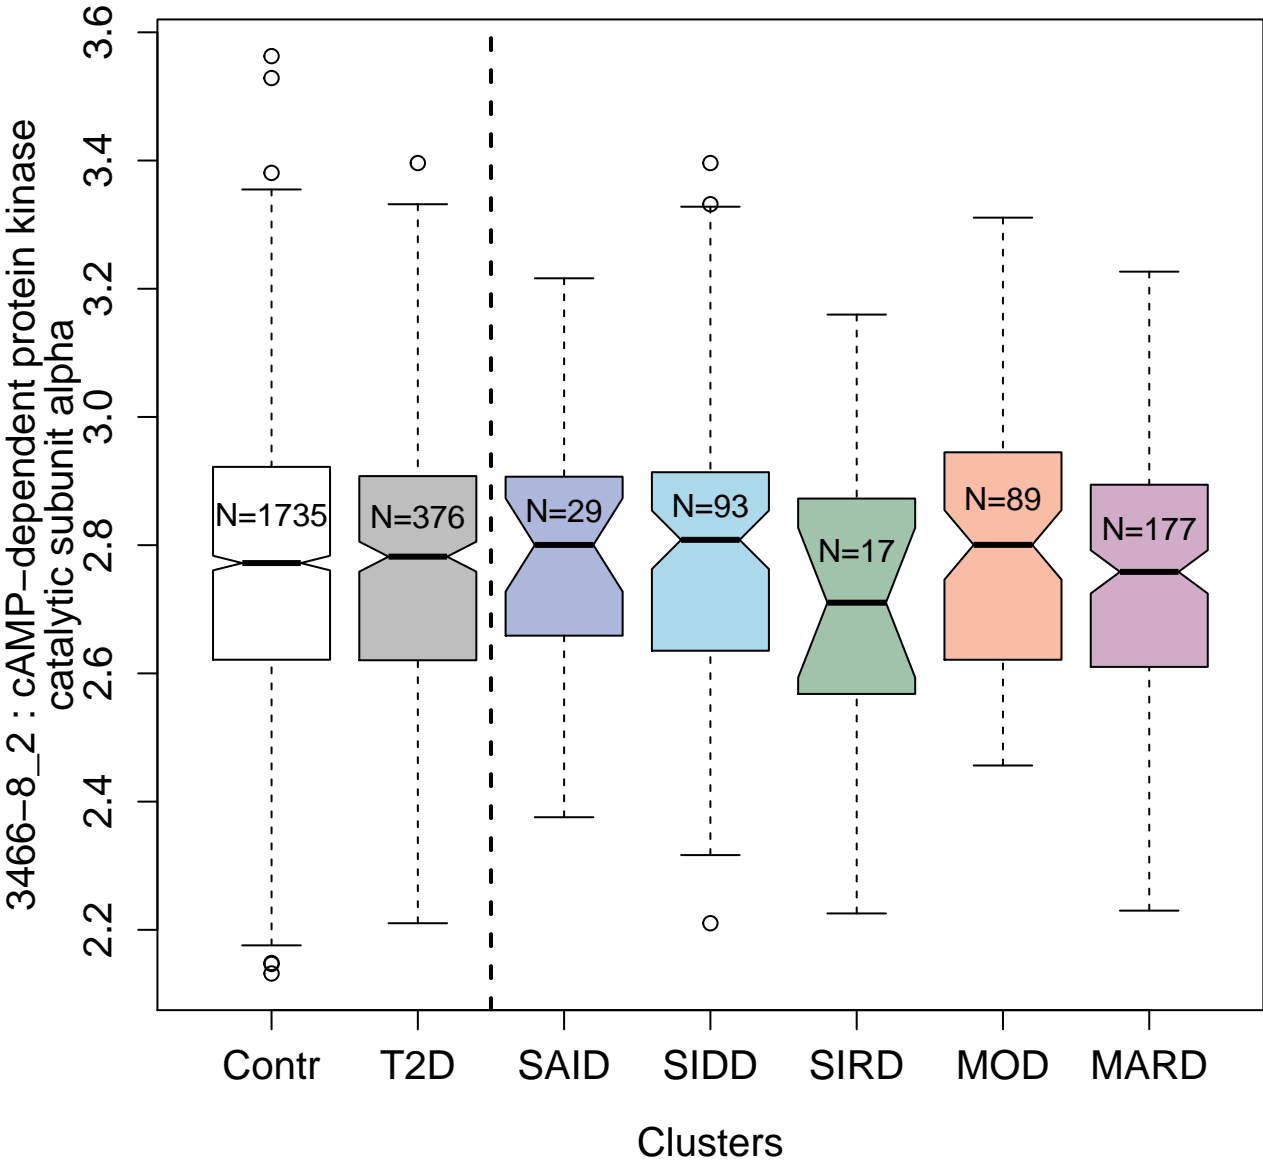

2869-68\_3 : Protein kinase C delta type

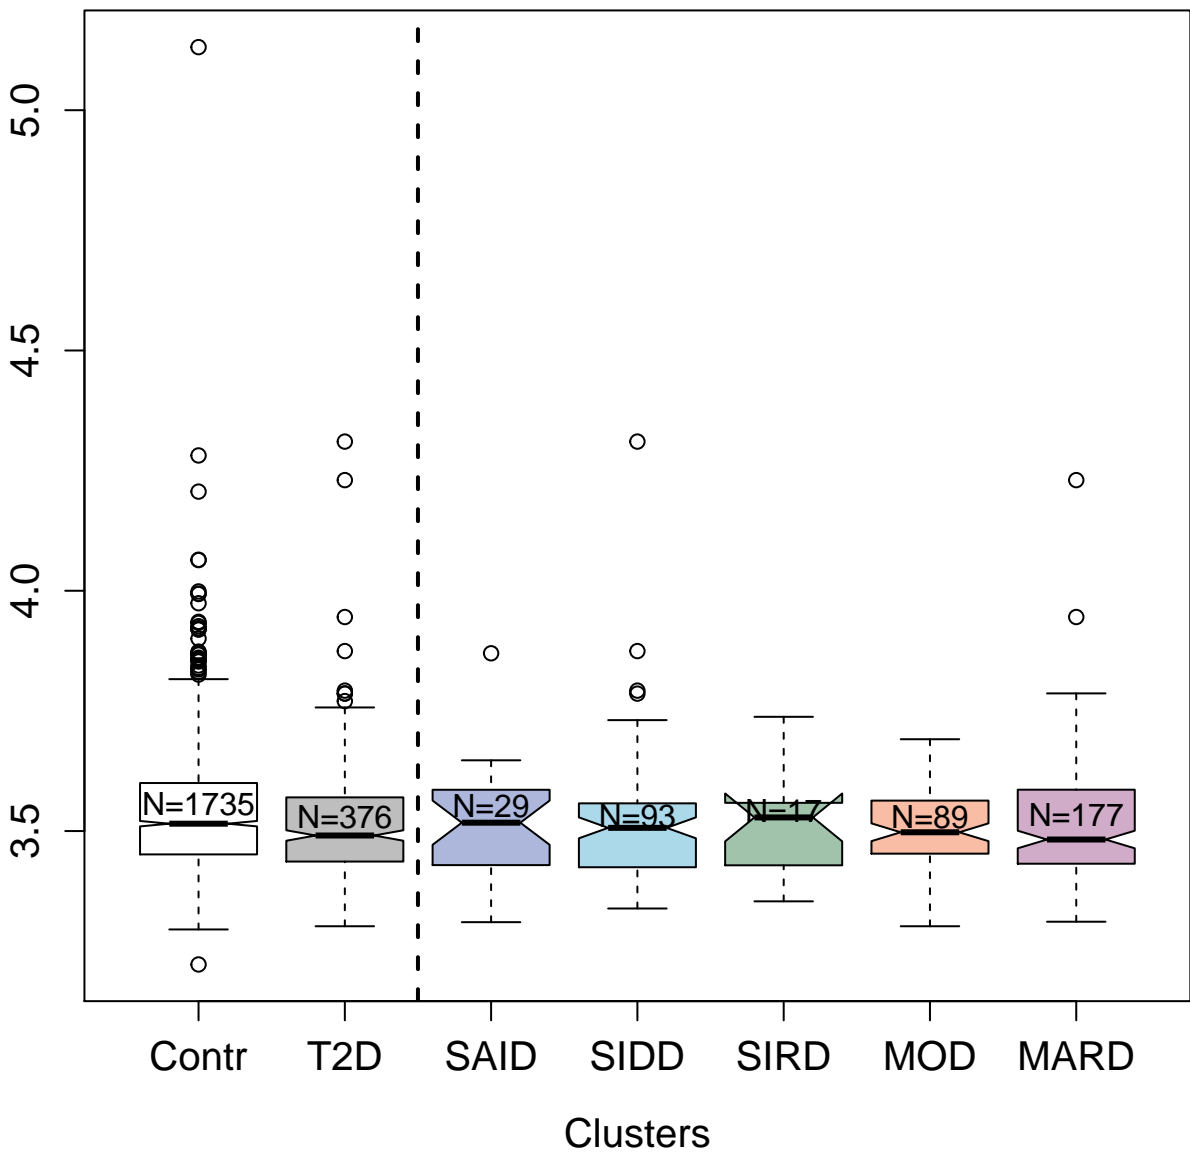

4551-72\_3 : Adhesion G-protein coupled receptor  
G5

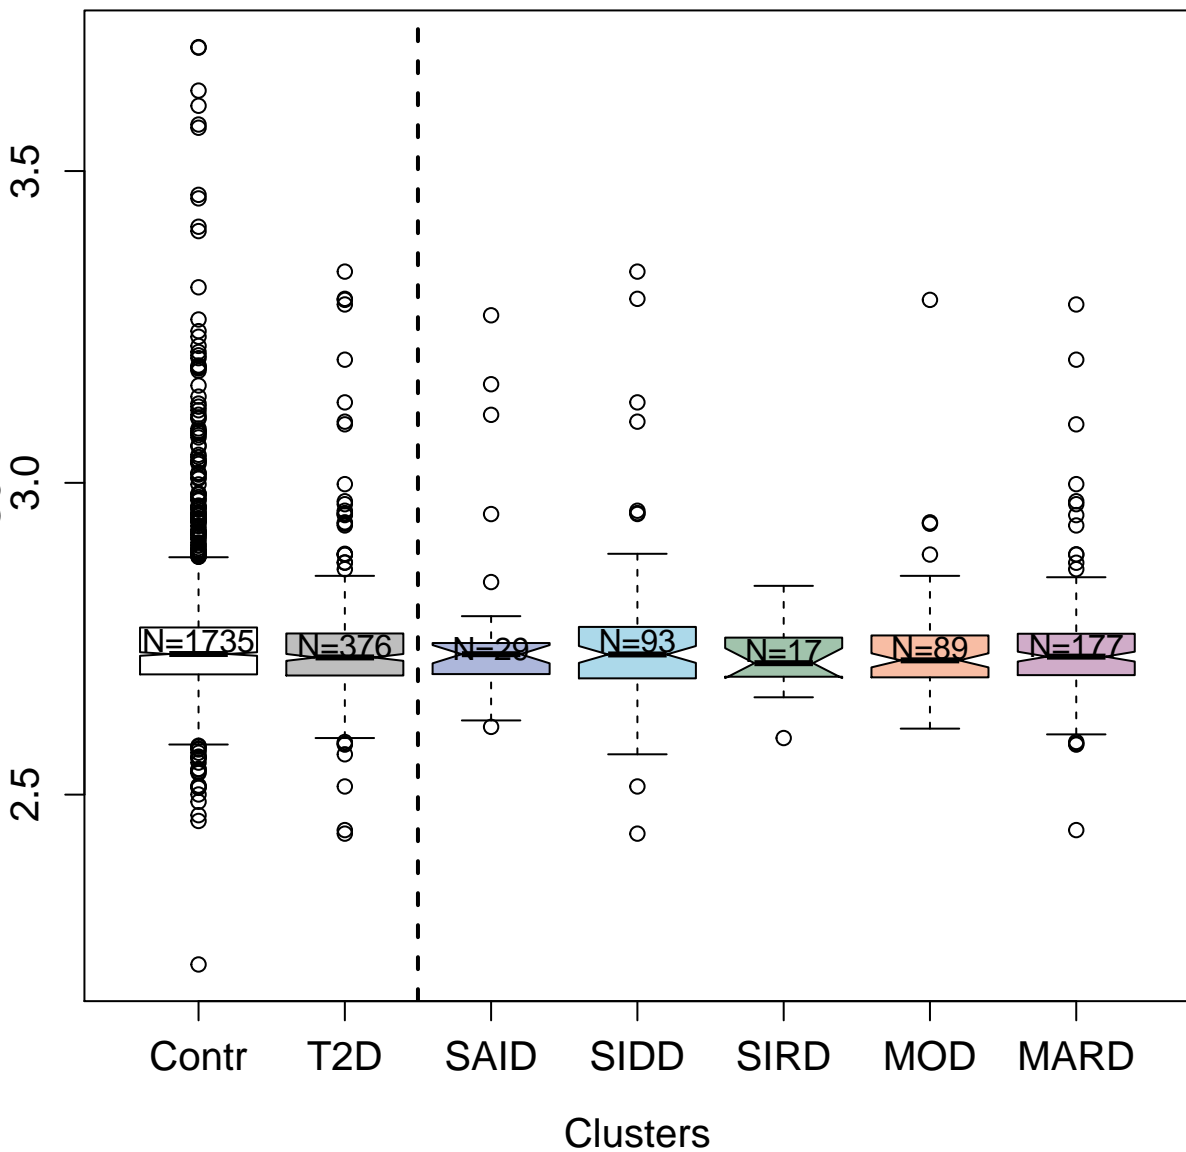

5861-78\_3 : 3-hydroxyanthranilate 3;4-dioxygenase

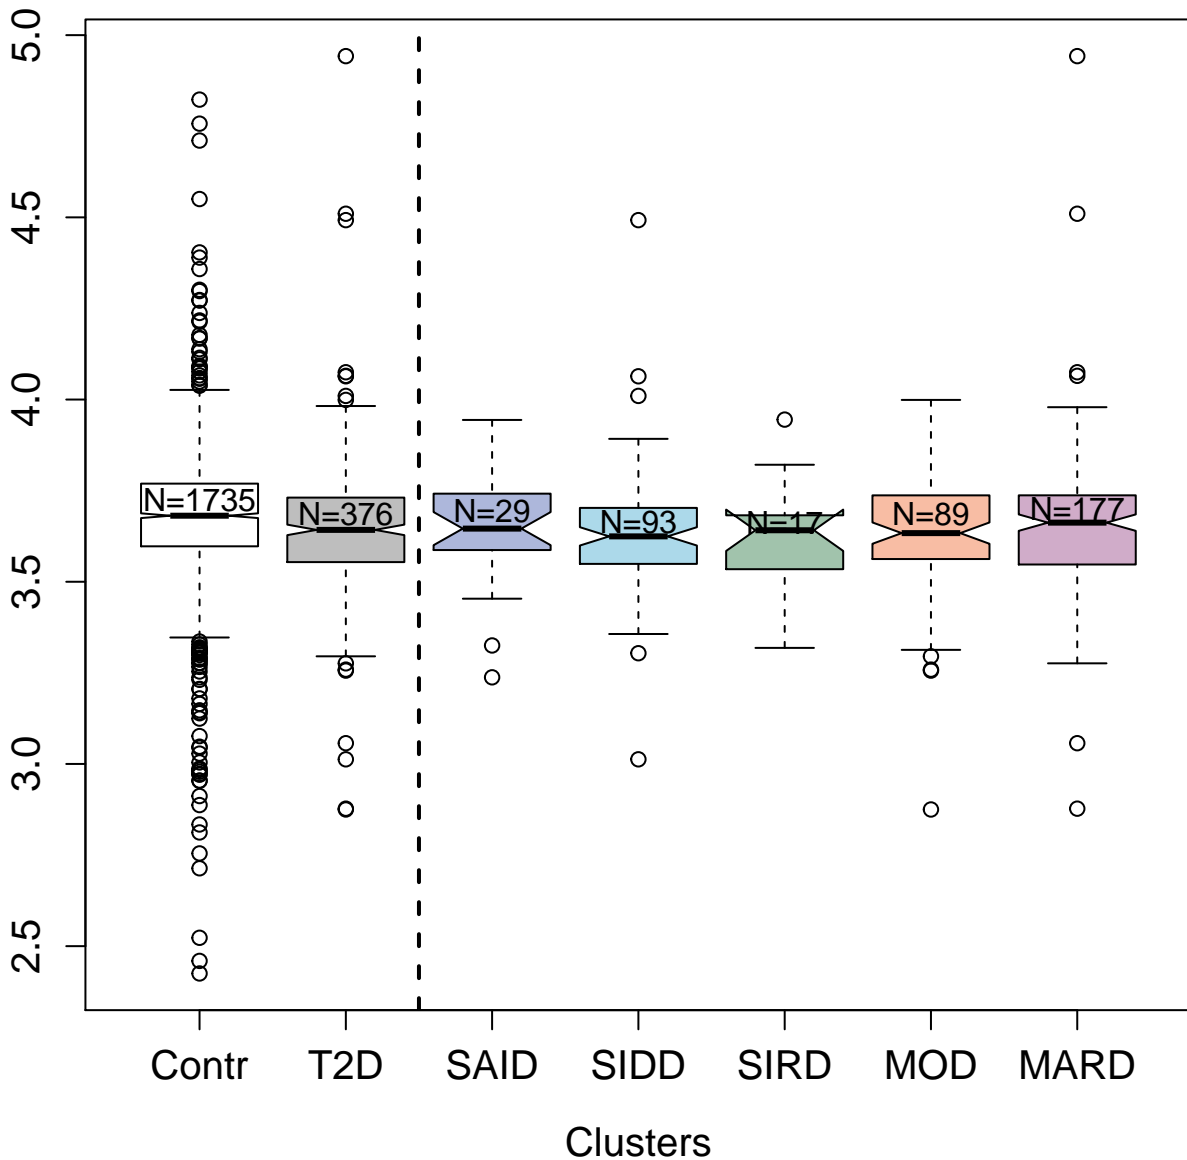

5024-67\_1 : Retinoblastoma-associated protein

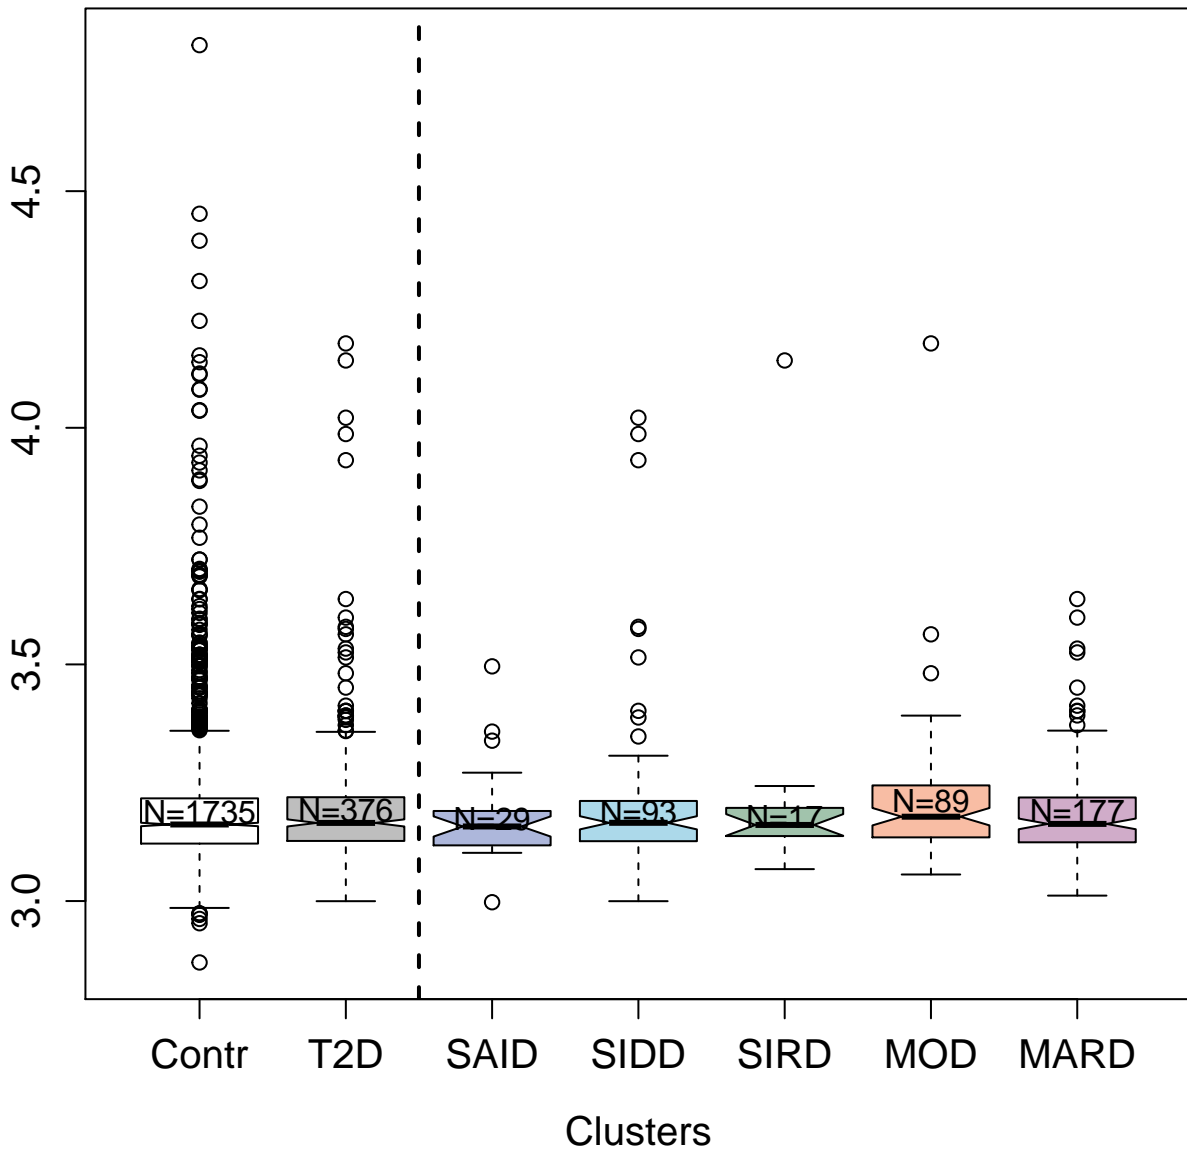

5337-64\_3 : T-lymphocyte activation antigen CD86

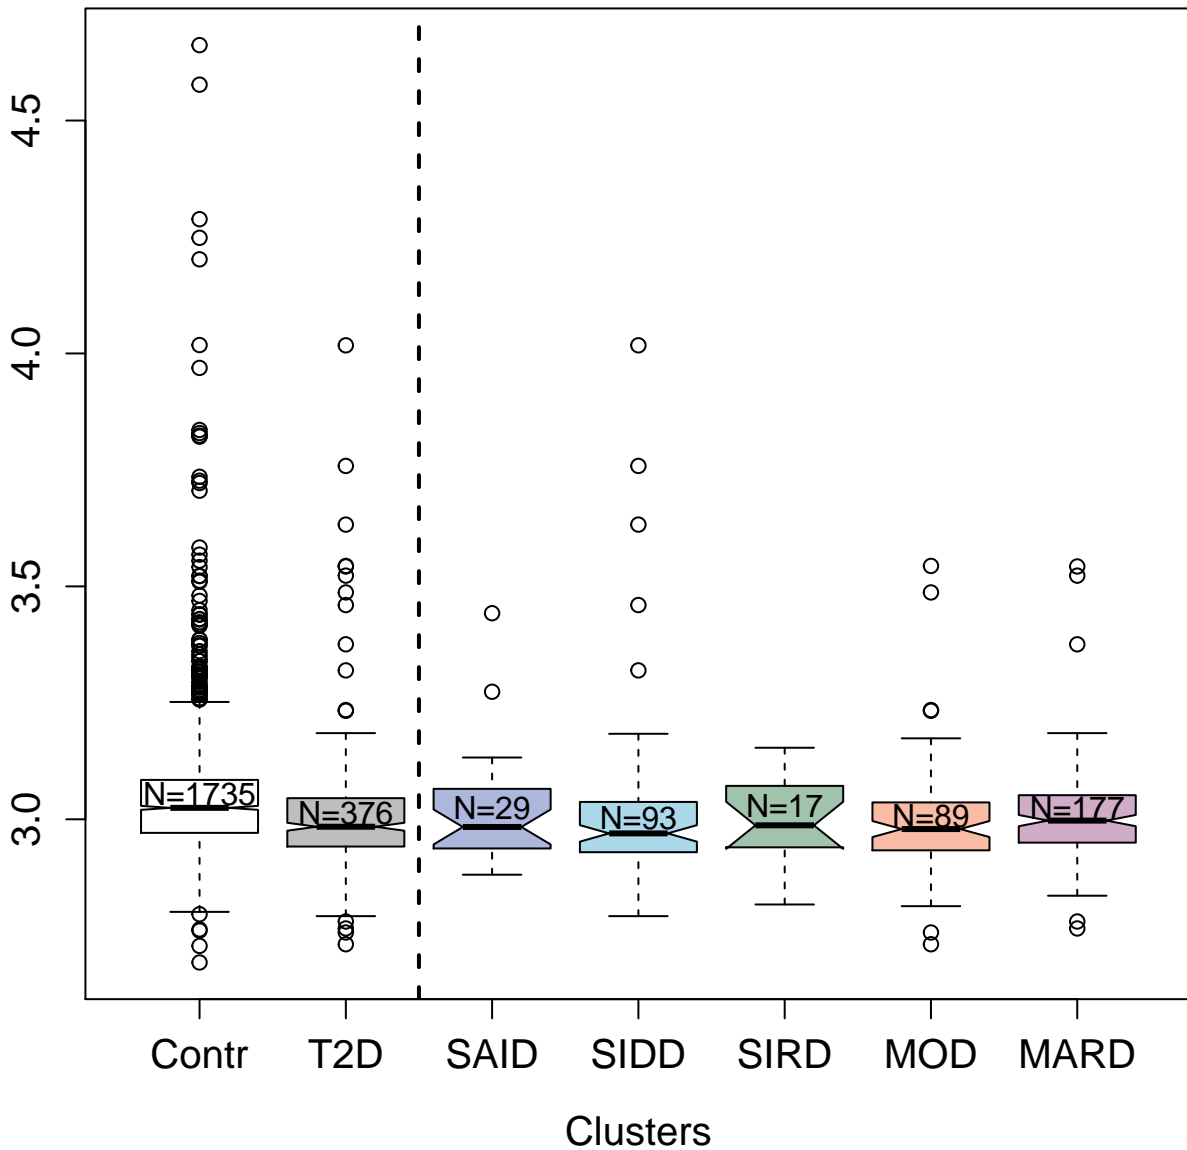



4278-14\_3 : Protein disulfide-isomerase

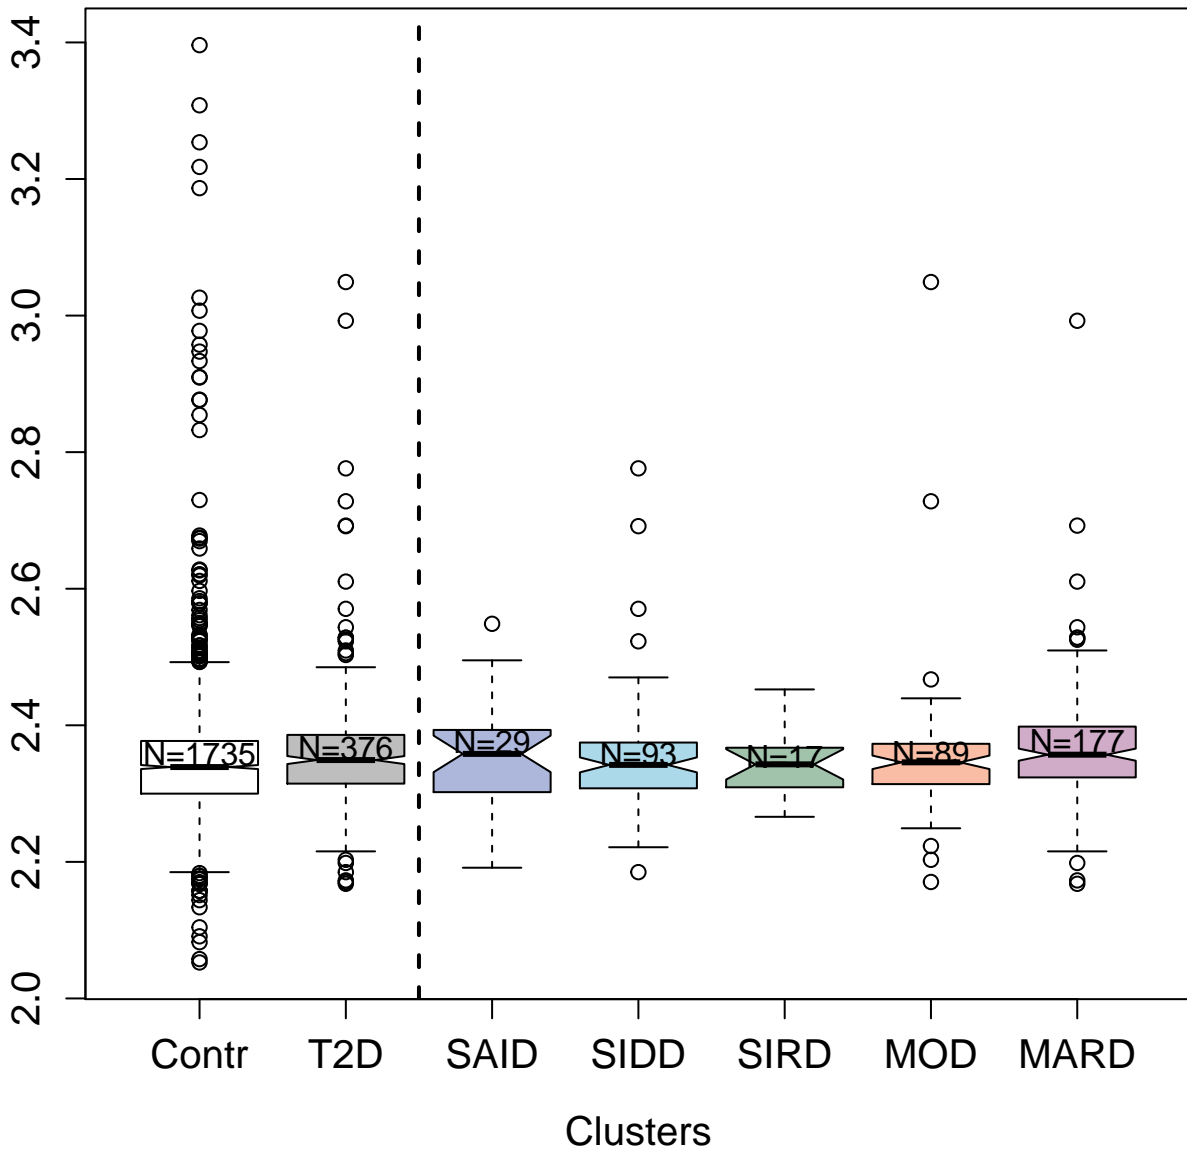

2879-9\_2 : Alpha-1-antichymotrypsin

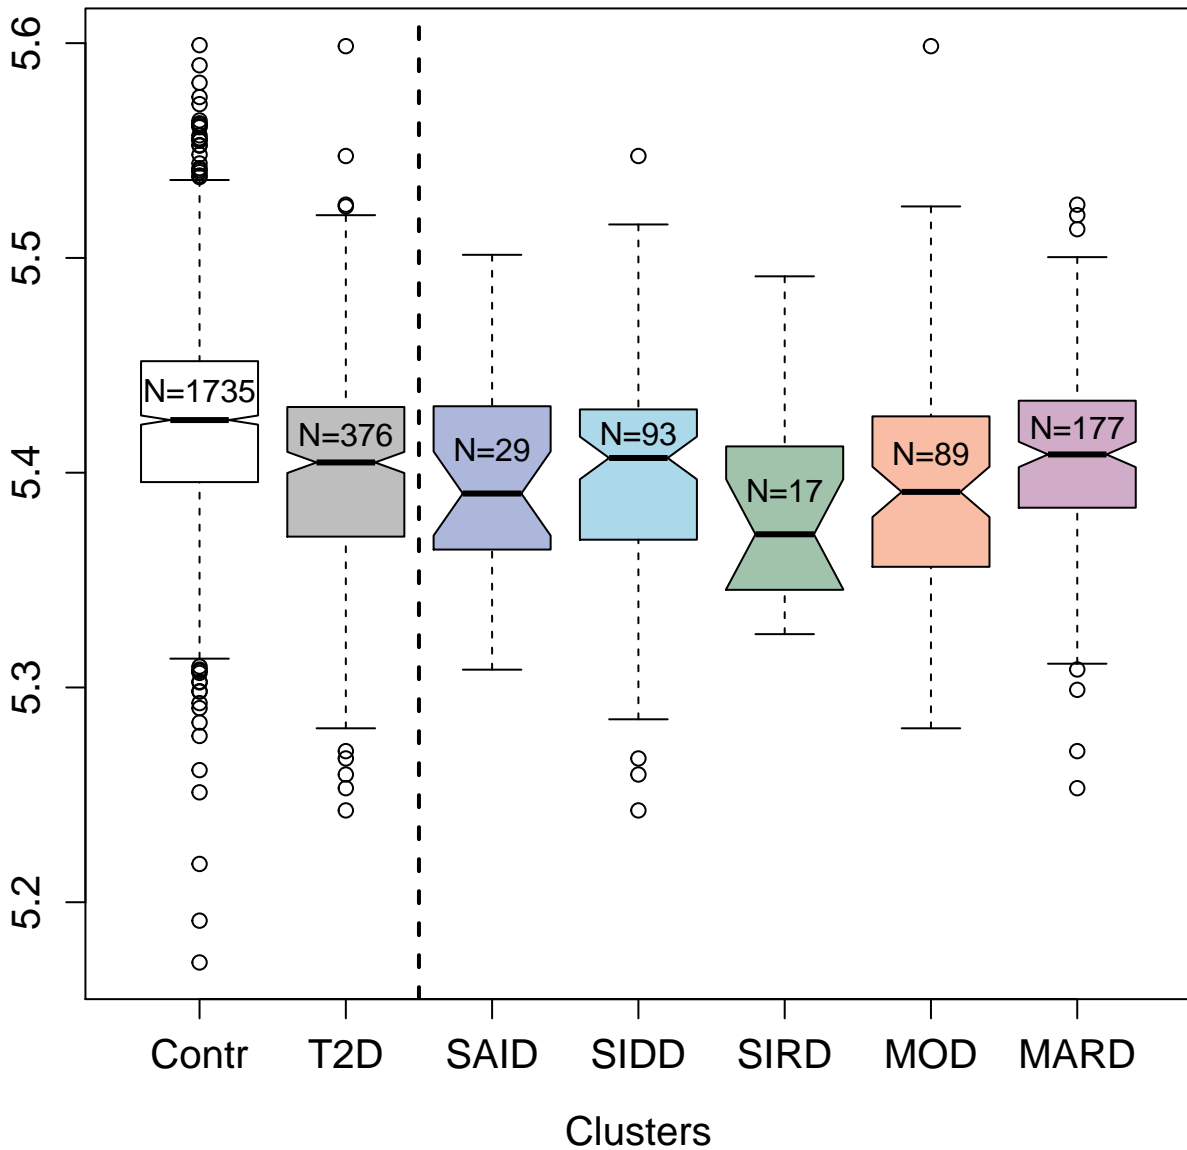

5481-16\_3 : Ras GTPase-activating protein 1

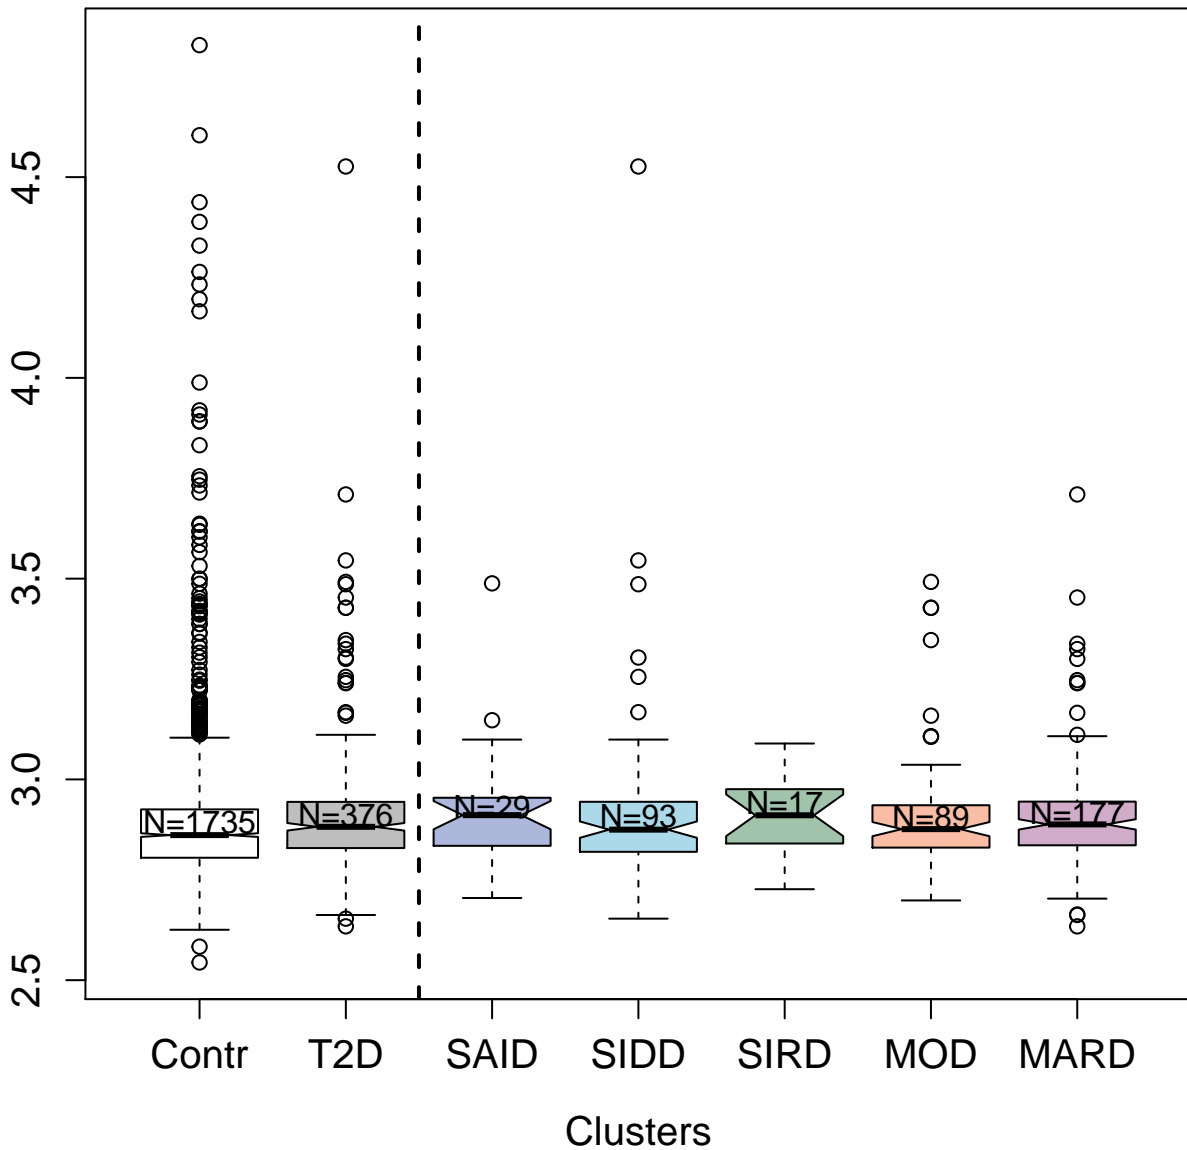

4717-55\_2 : Interleukin-3

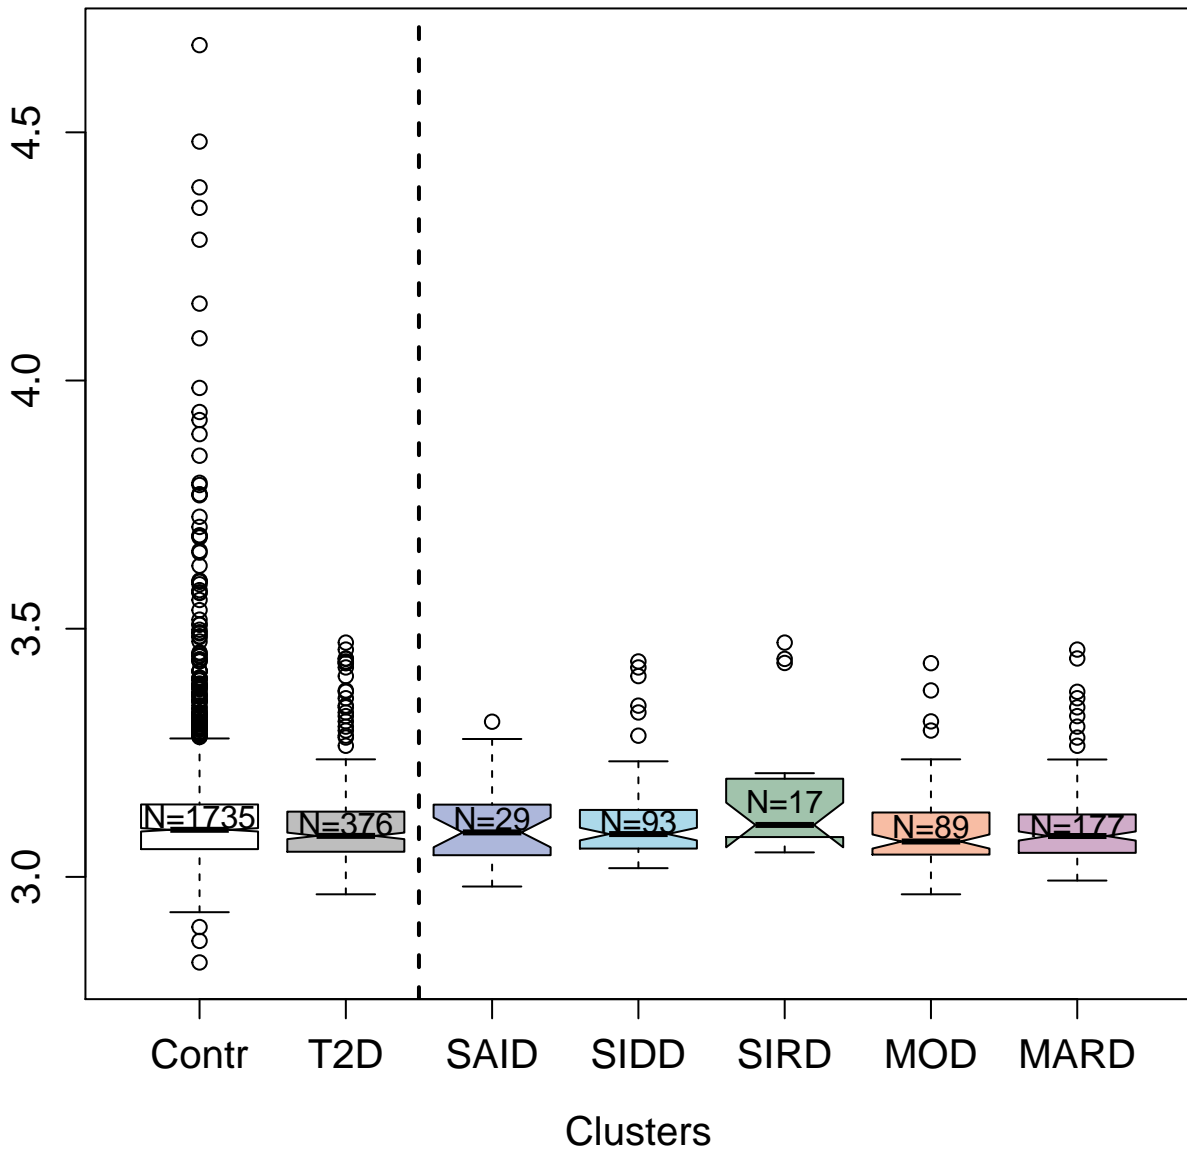

14127-240\_3 : Interferon beta

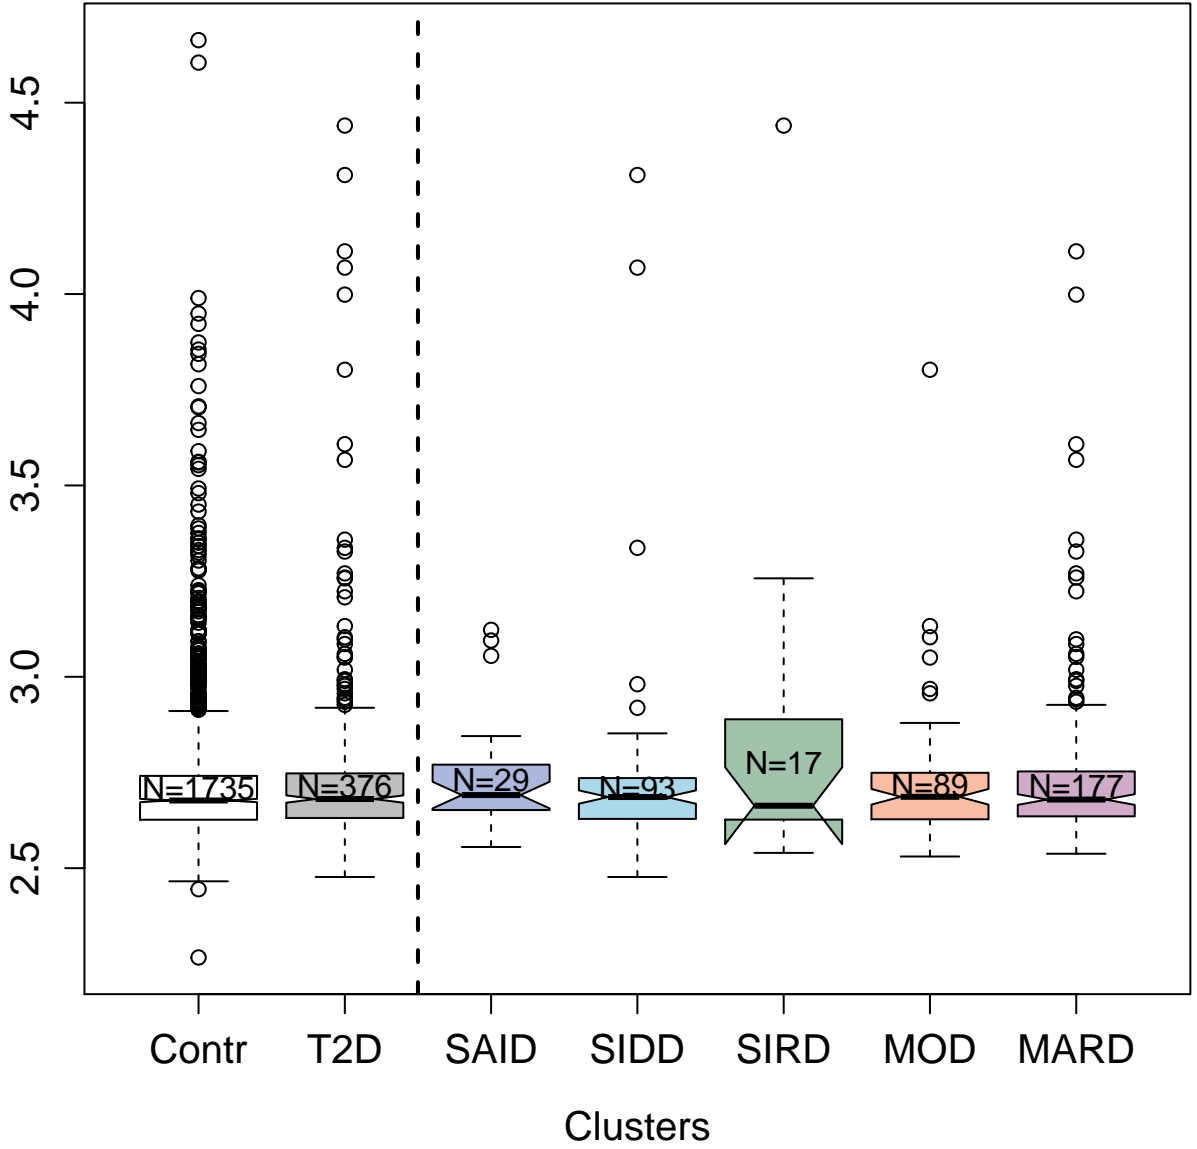

2505-49\_3 : GDNF family receptor alpha-3

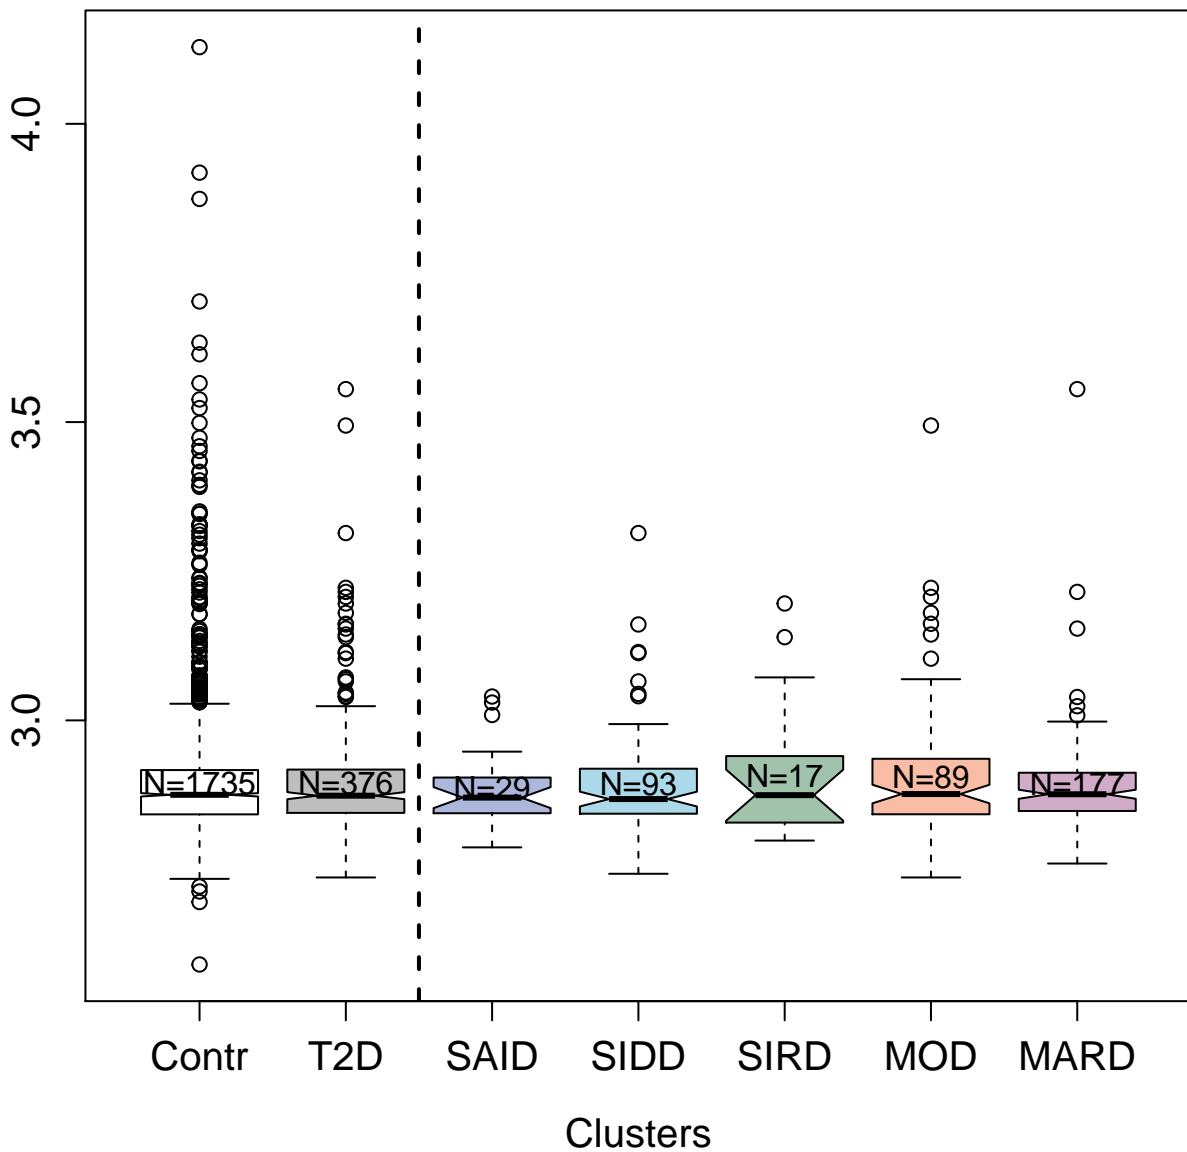

4455-89\_2 : Lactadherin

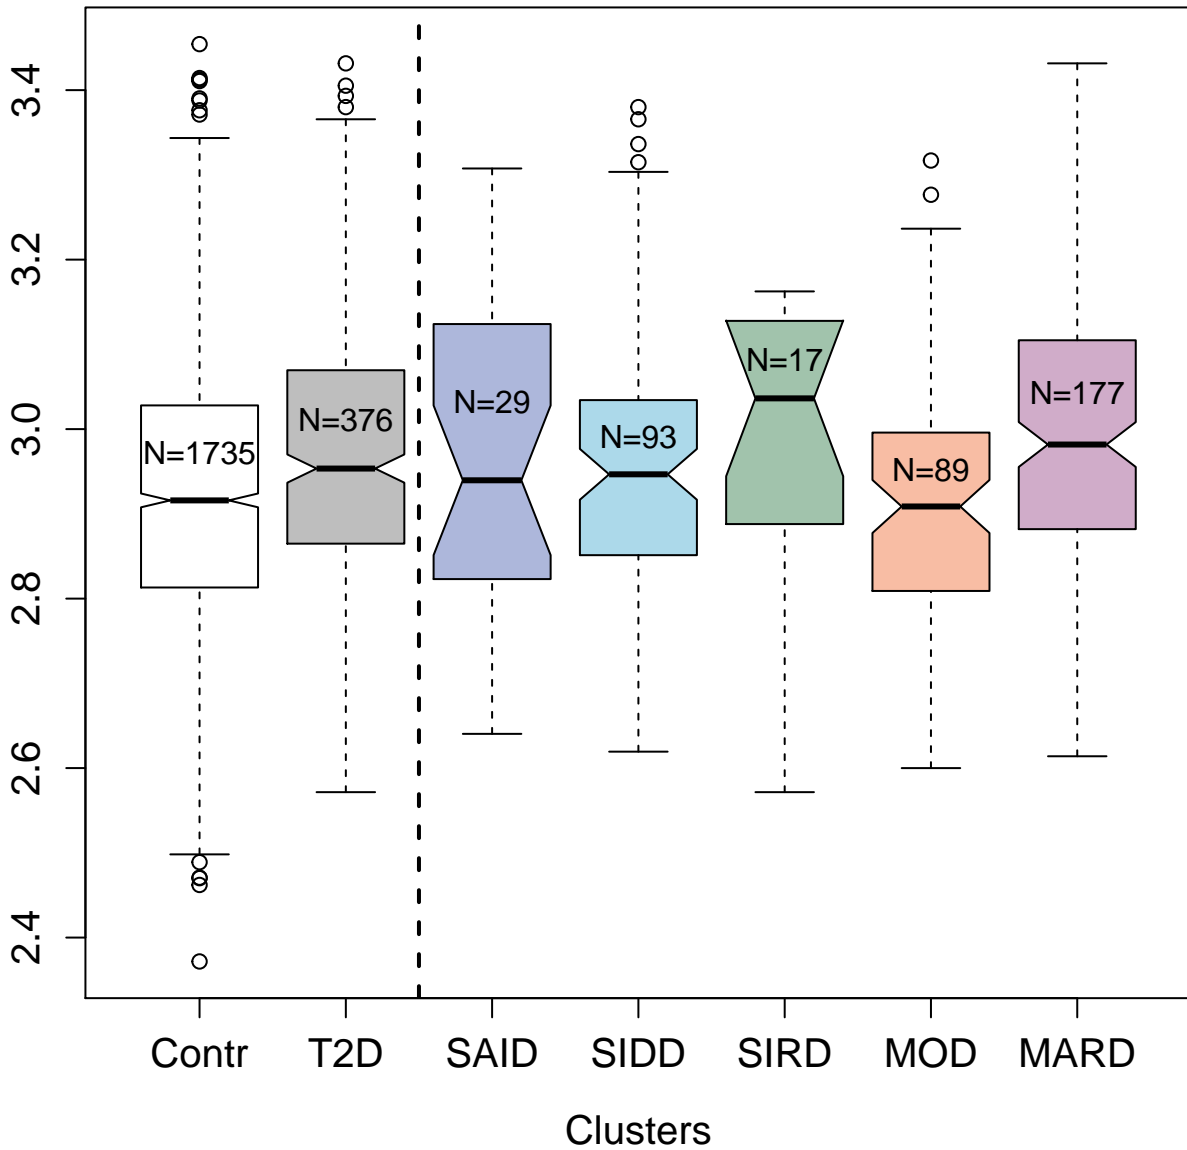

4496-60\_2 : Macrophage metalloelastase

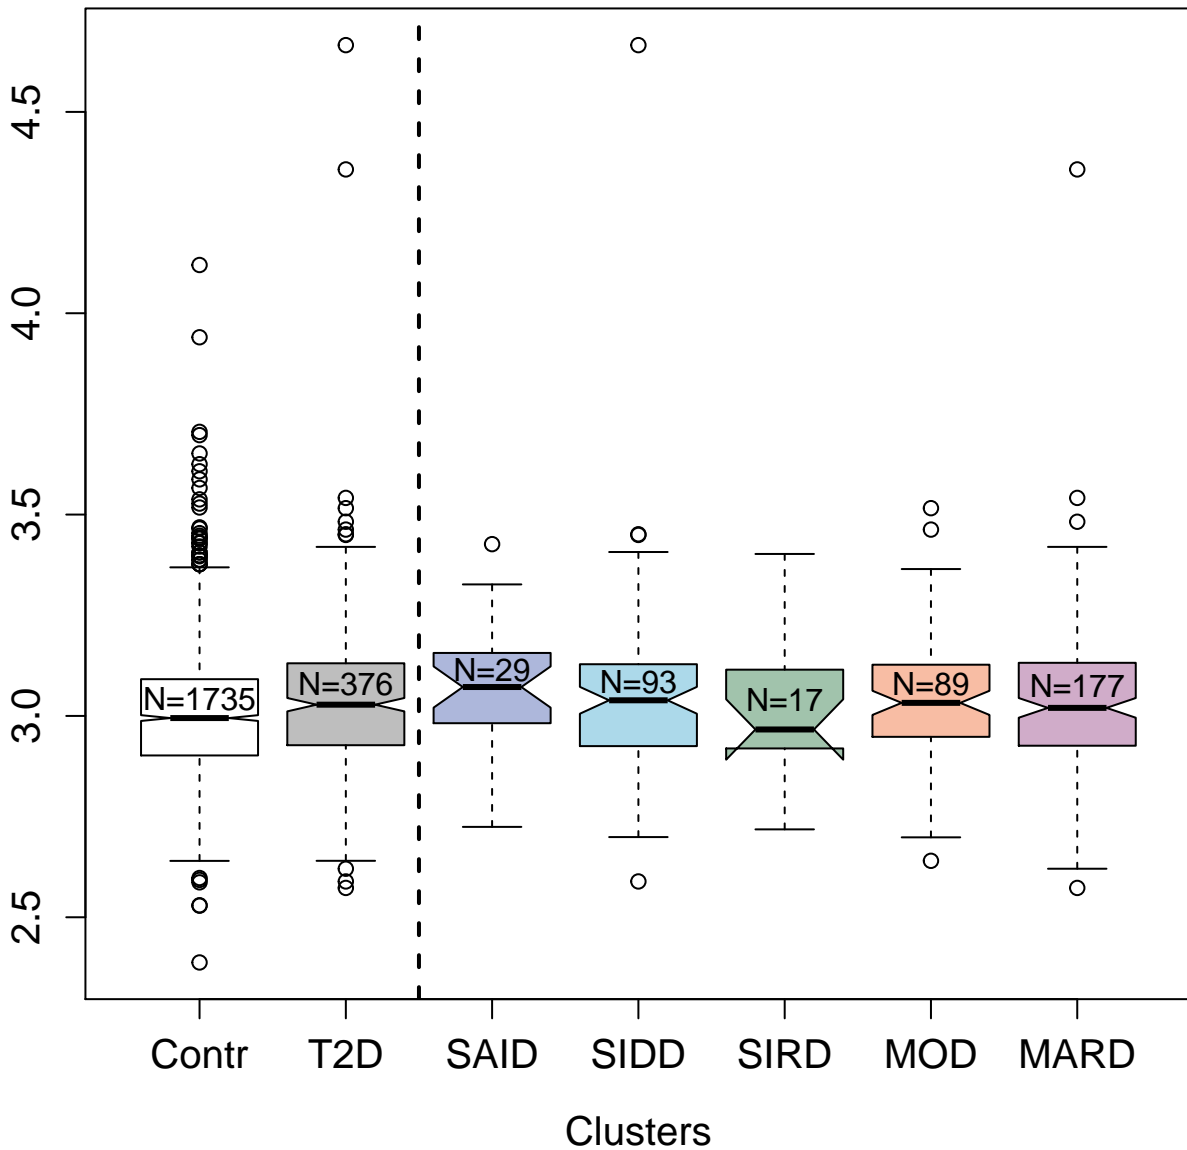



2890-59\_2 : C-C motif chemokine 28

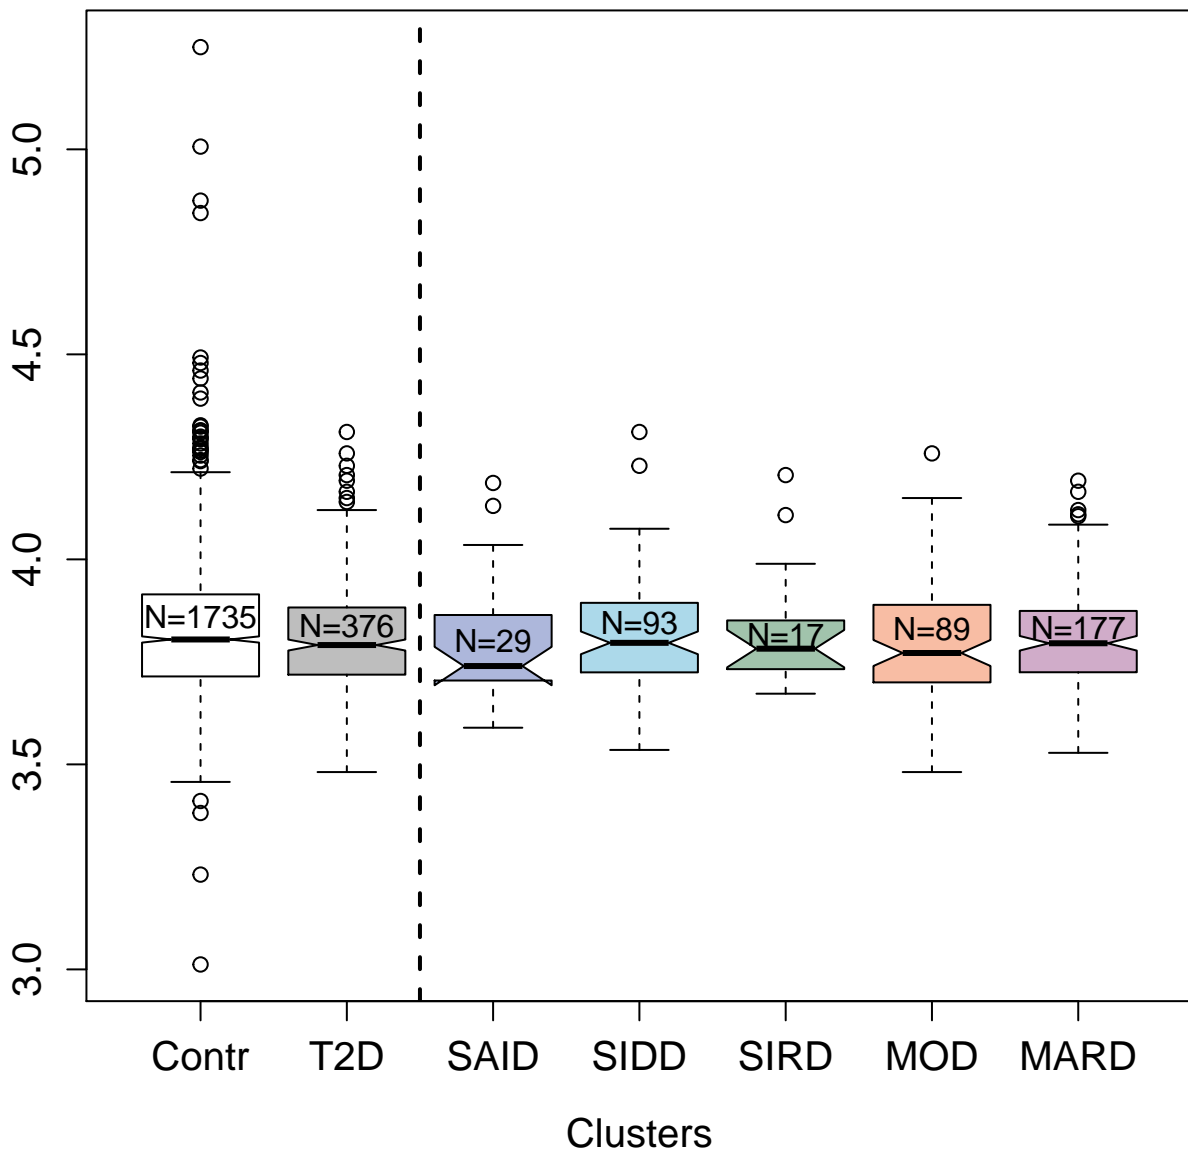

3403-1\_2 : Tryptase beta-2

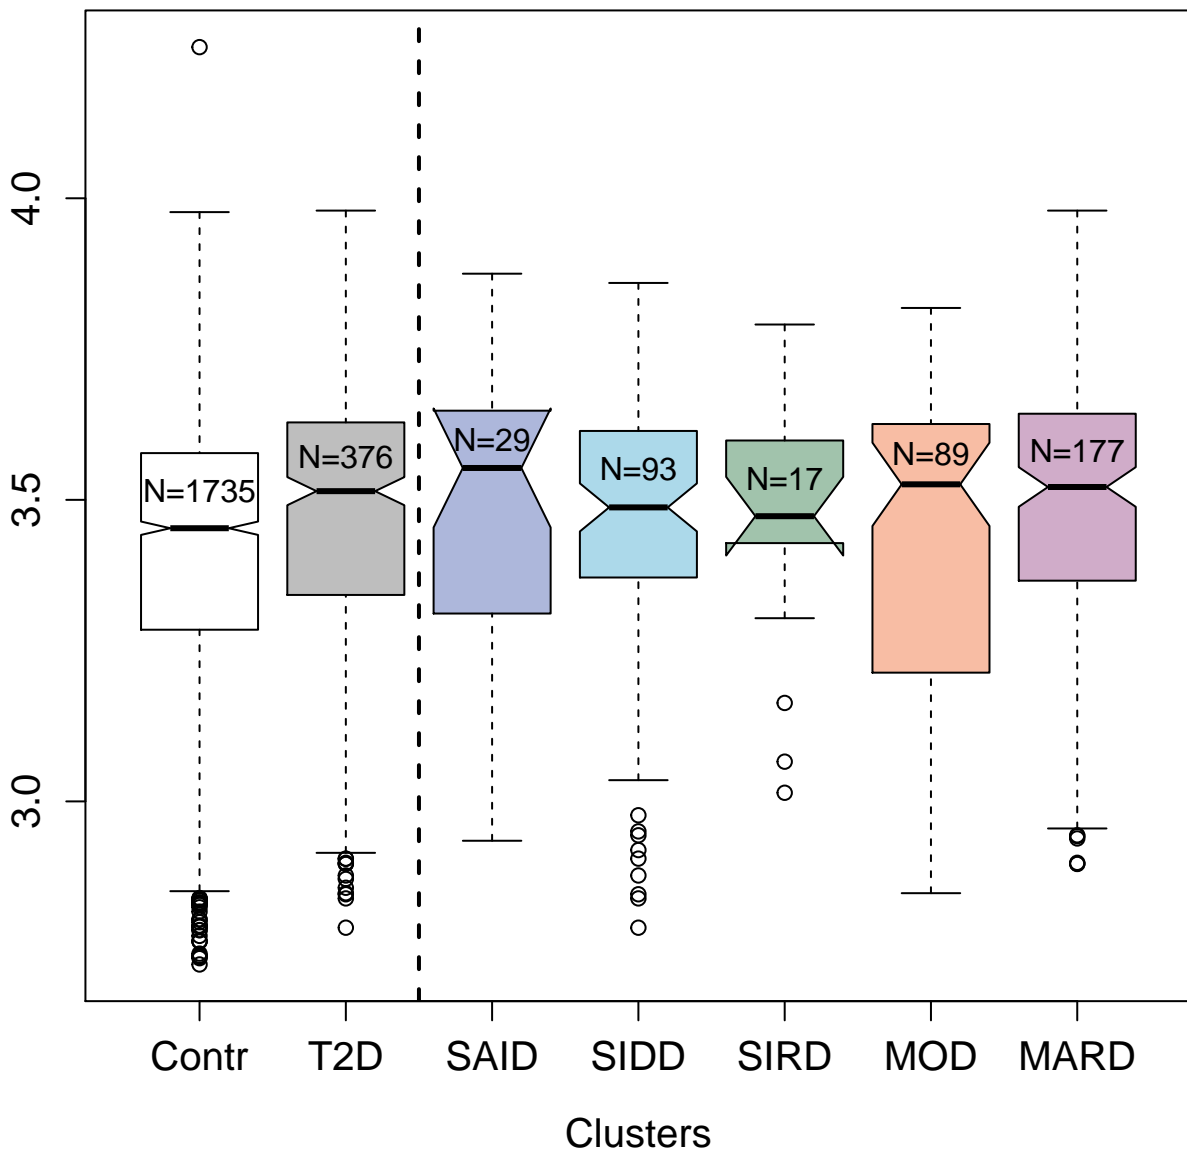

5009-11\_1 : Moesin

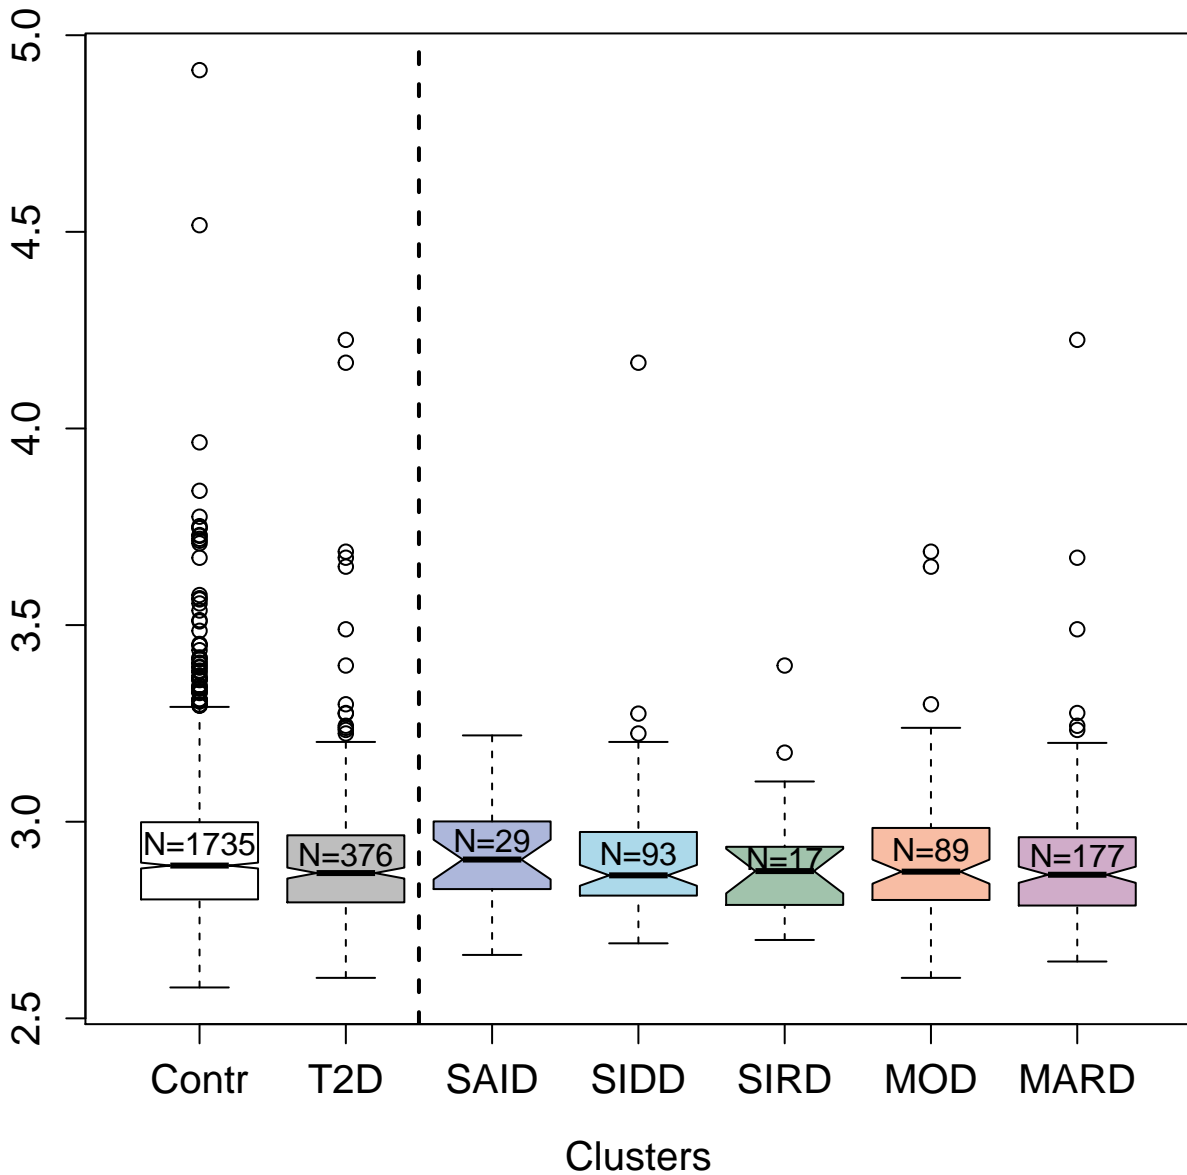

2762-30\_2 : Fibroblast growth factor 19

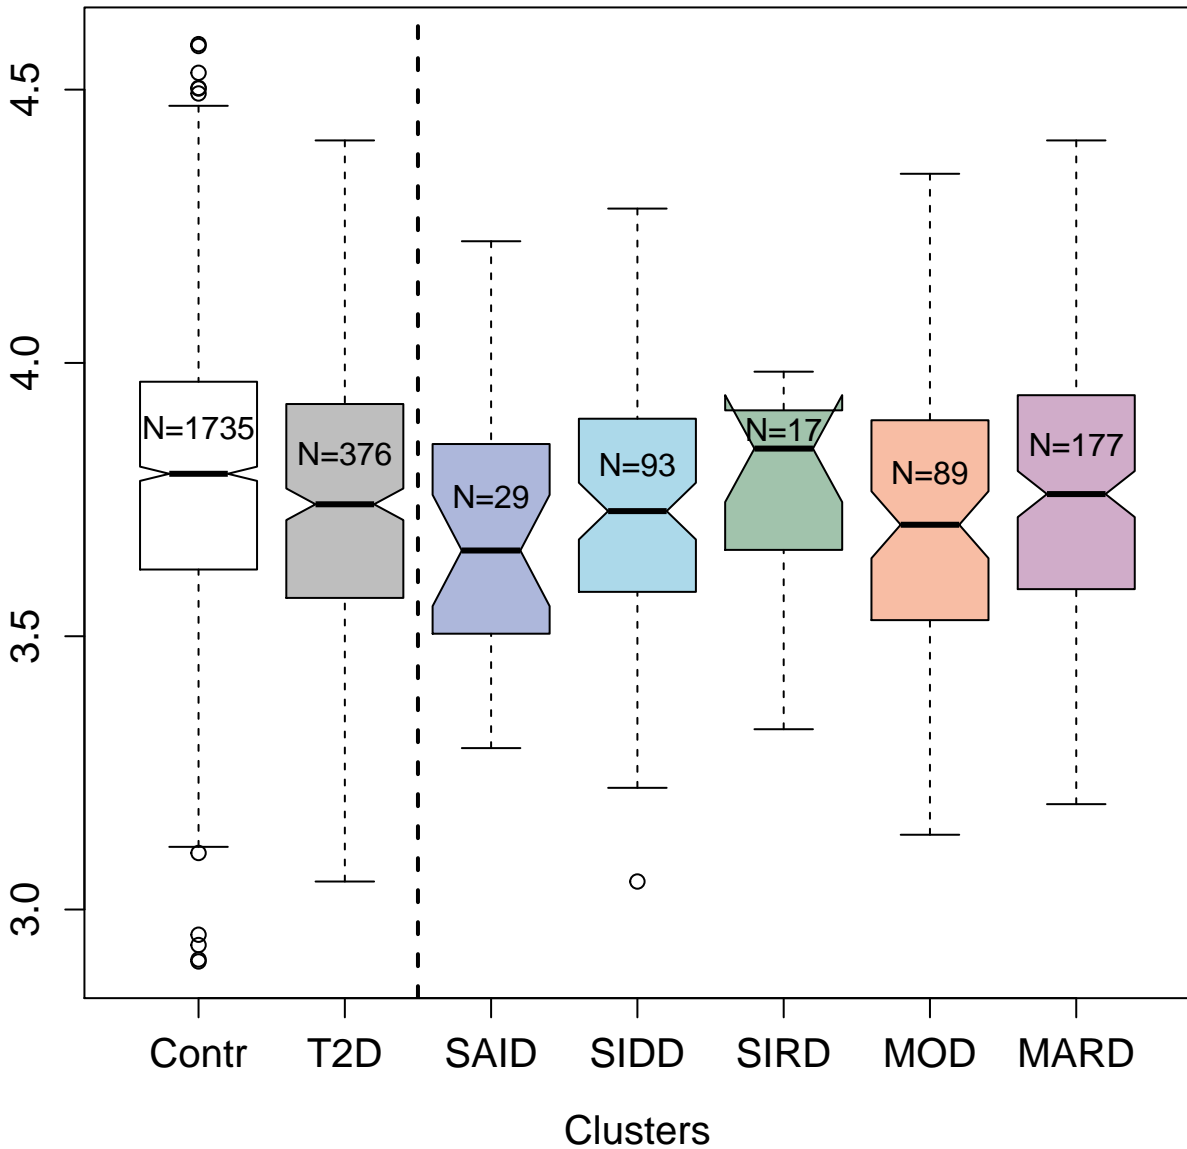

4452-9\_2 : Leucine-rich repeat transmembrane neuronal protein 1

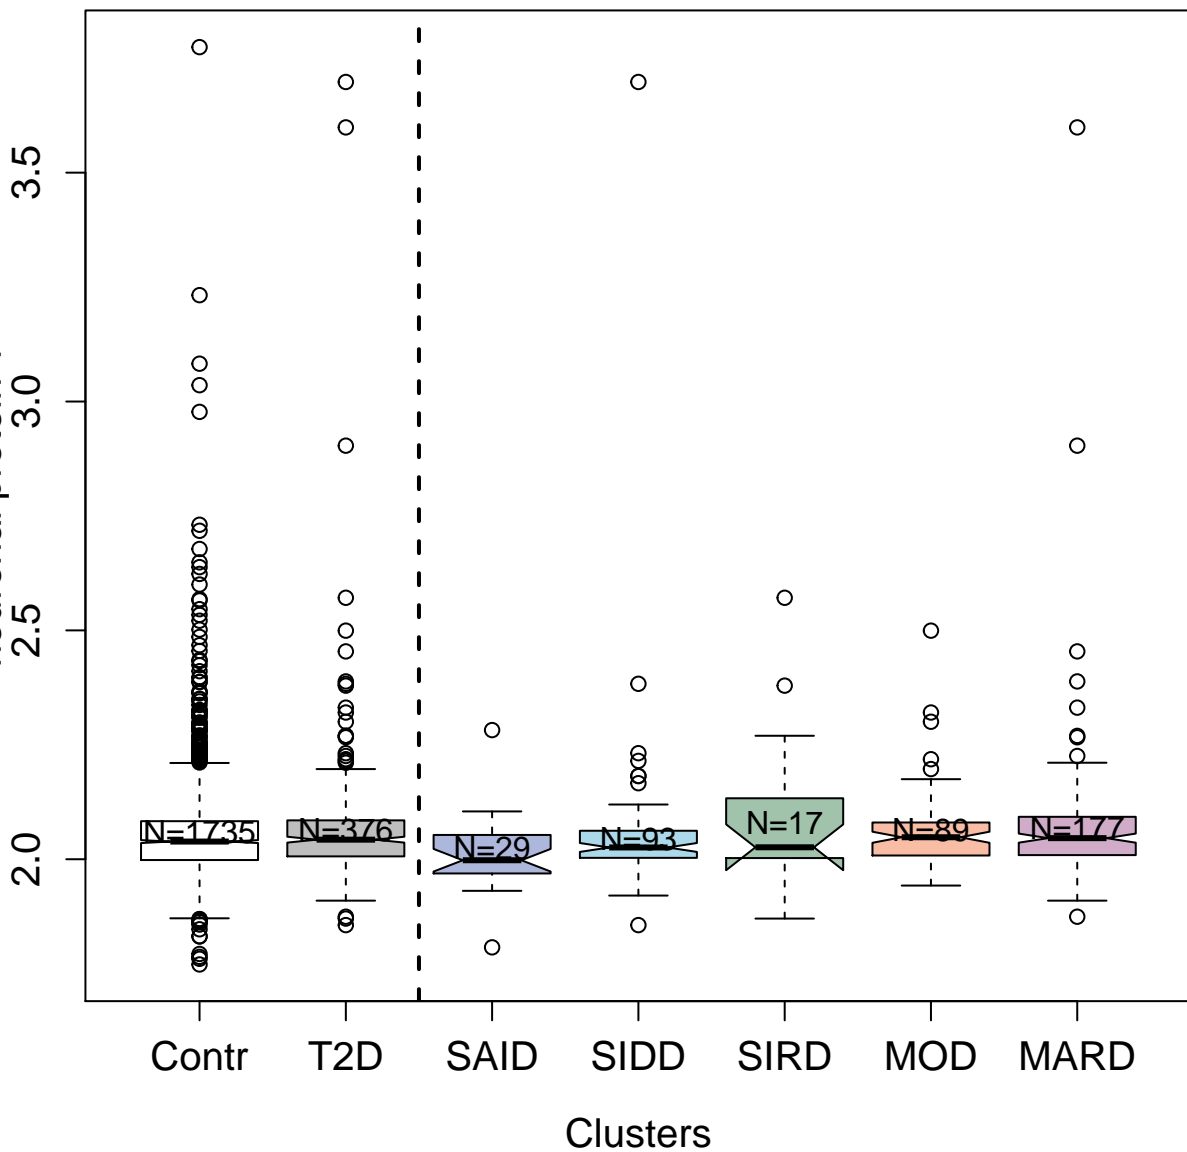

2833-20\_1 : Kallikrein-4

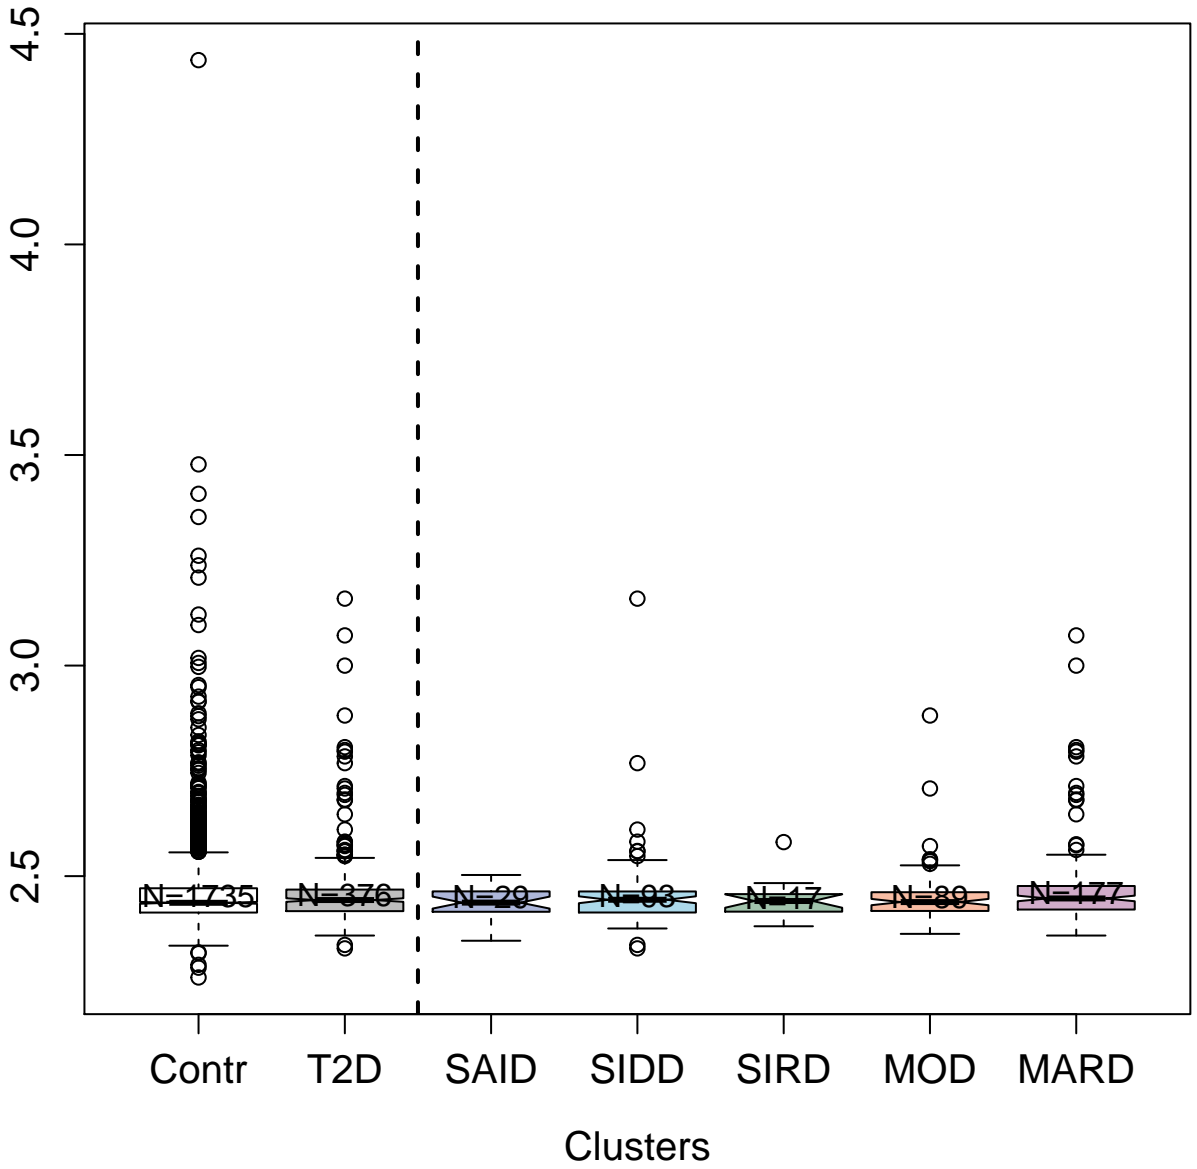

4297-62\_3 : Spondin-1

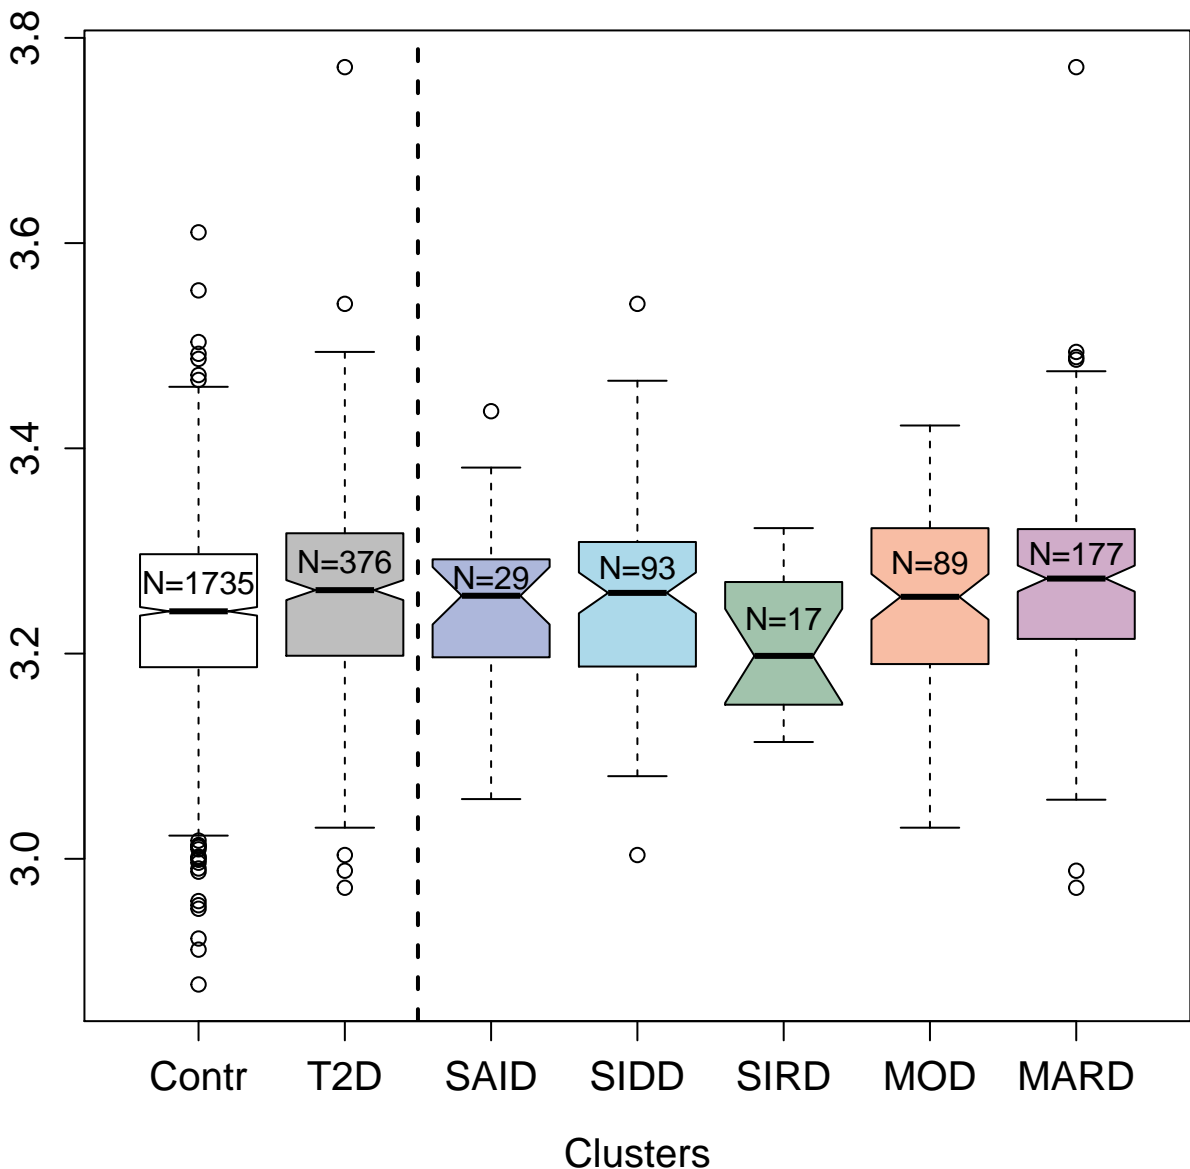

3389-7\_2 : Plasma serine protease inhibitor

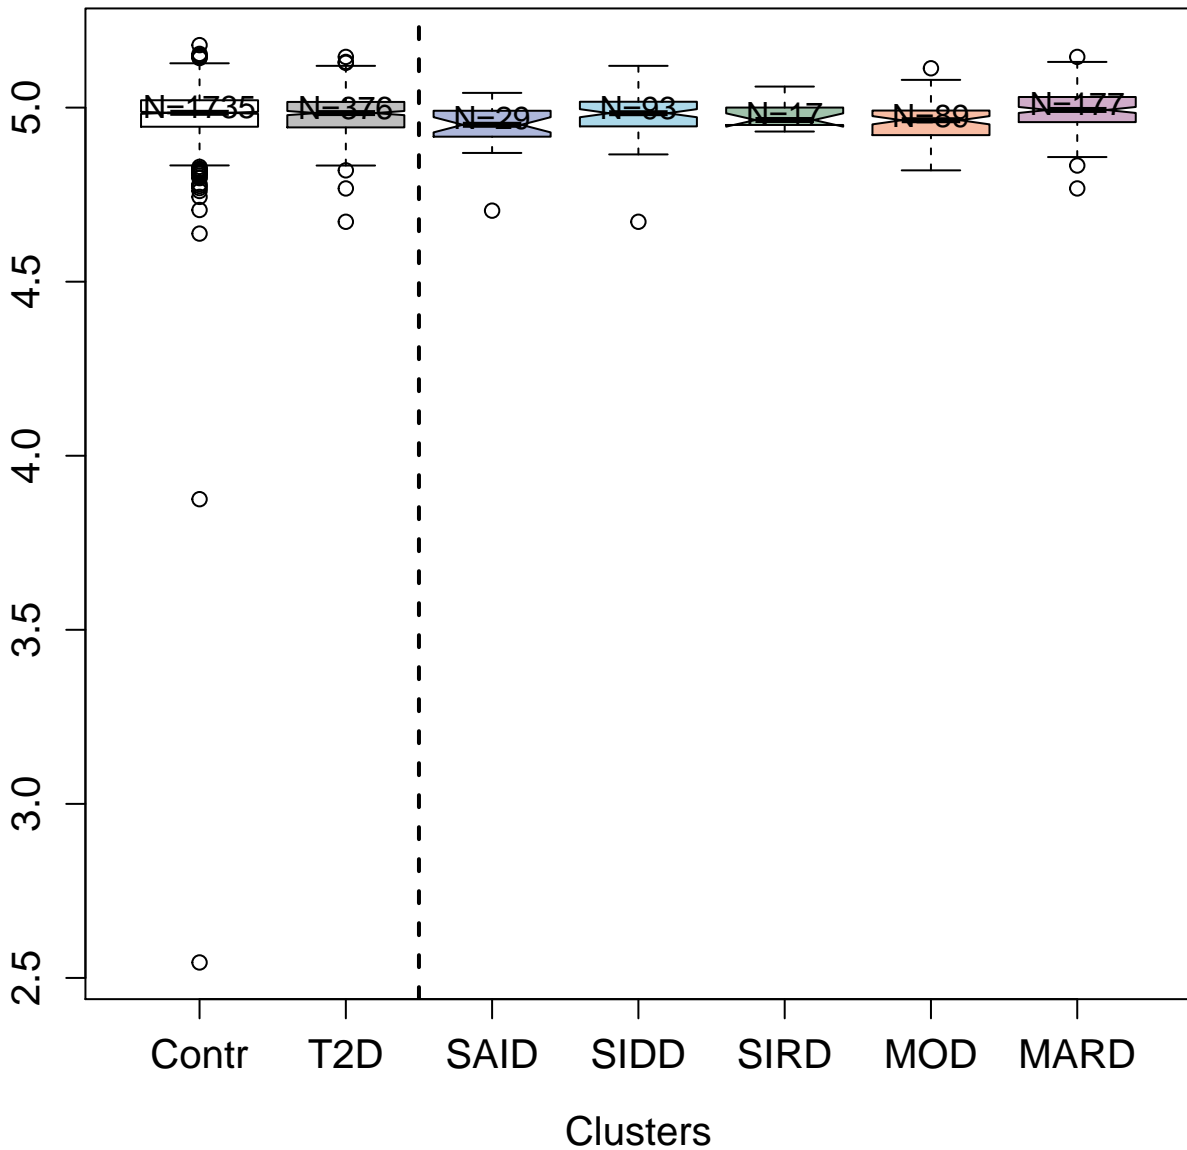



3894-15\_2 : N-acetyl-D-glucosamine kinase

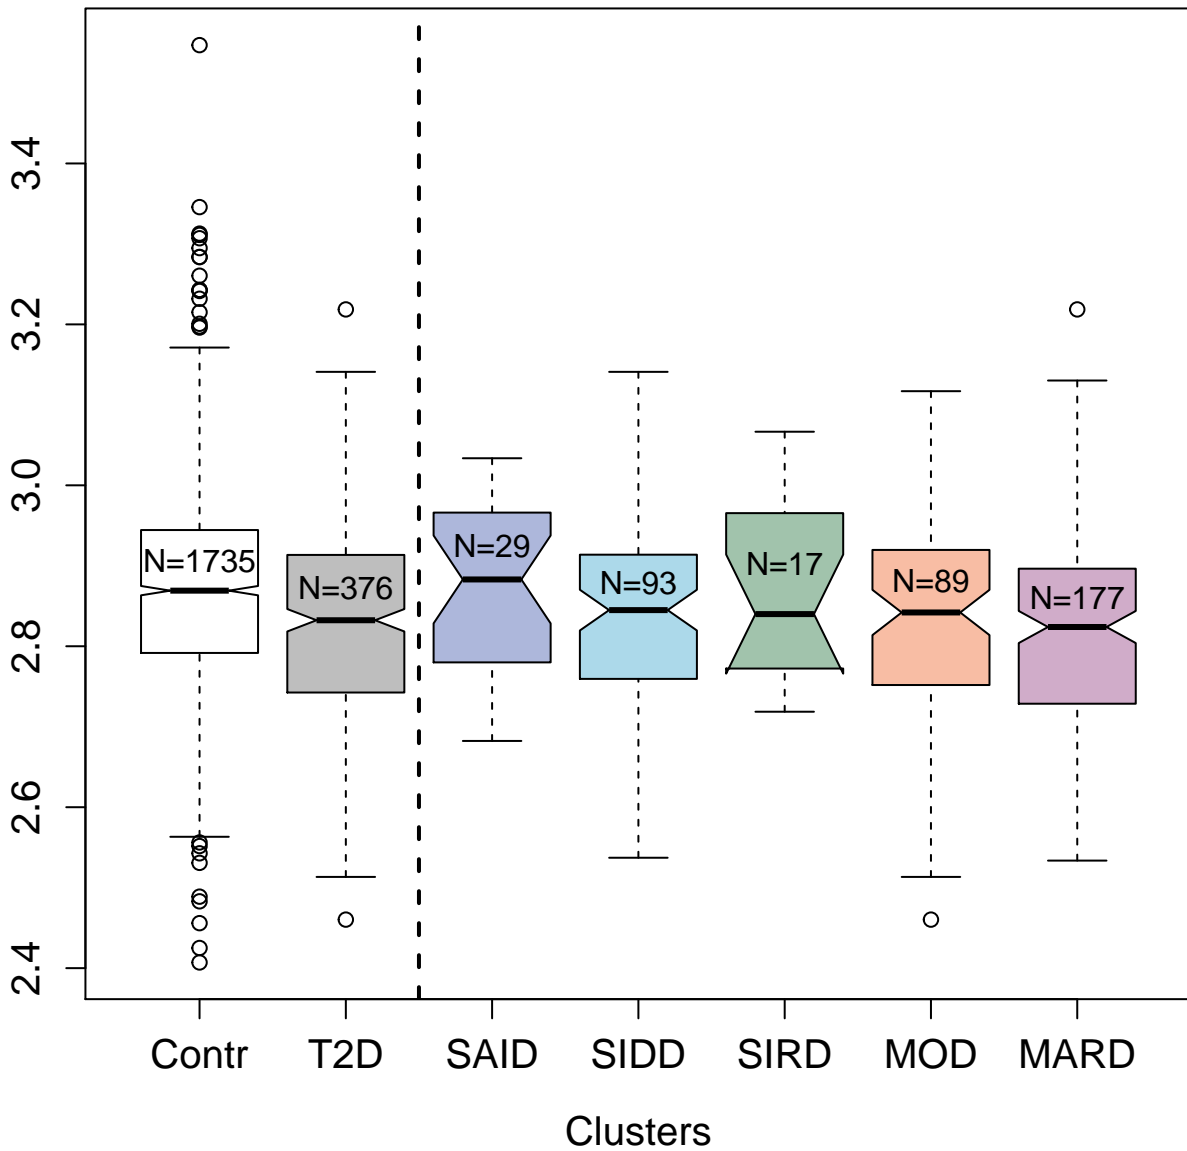

3802-50\_1 : Cystatin-S

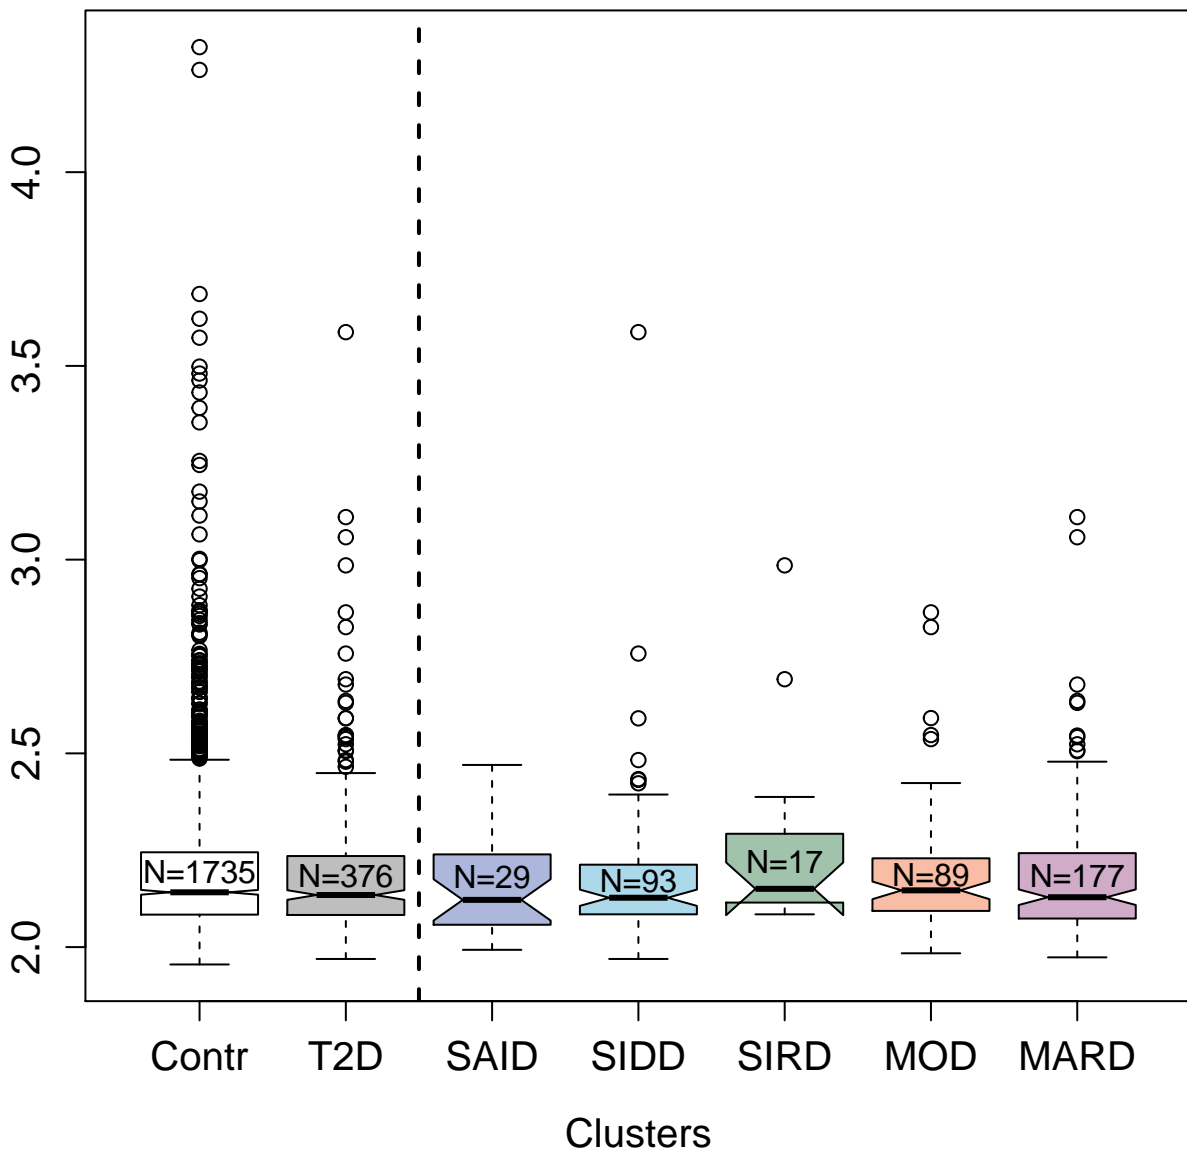

3479-71\_2 : Trypsin-3

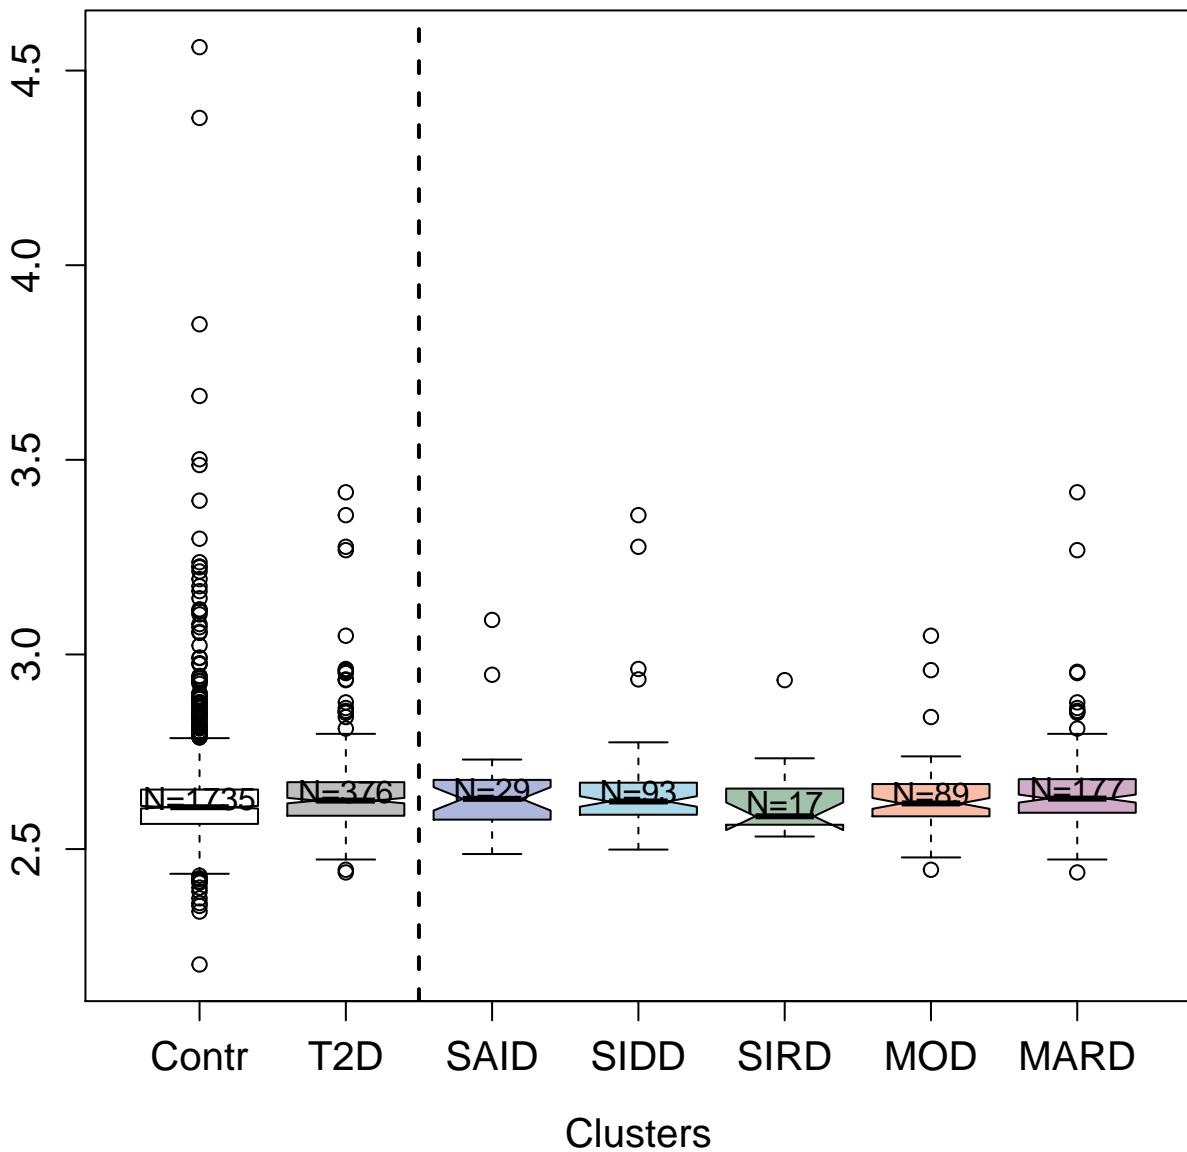

3864-5\_2 : 40S ribosomal protein S7

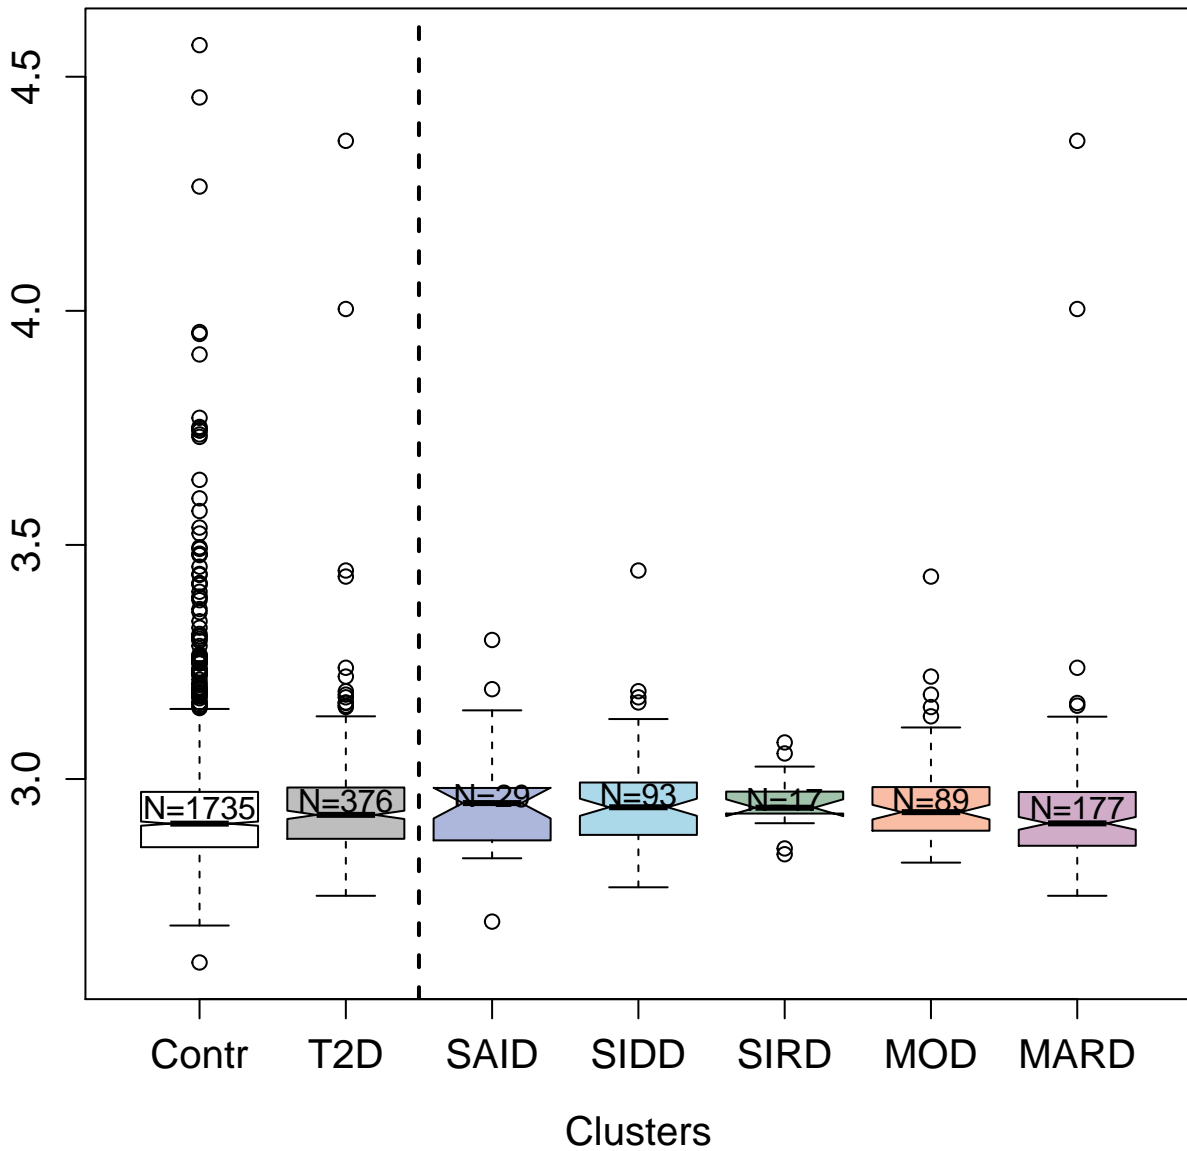

3471-49\_1 : Serine/threonine-protein kinase 16

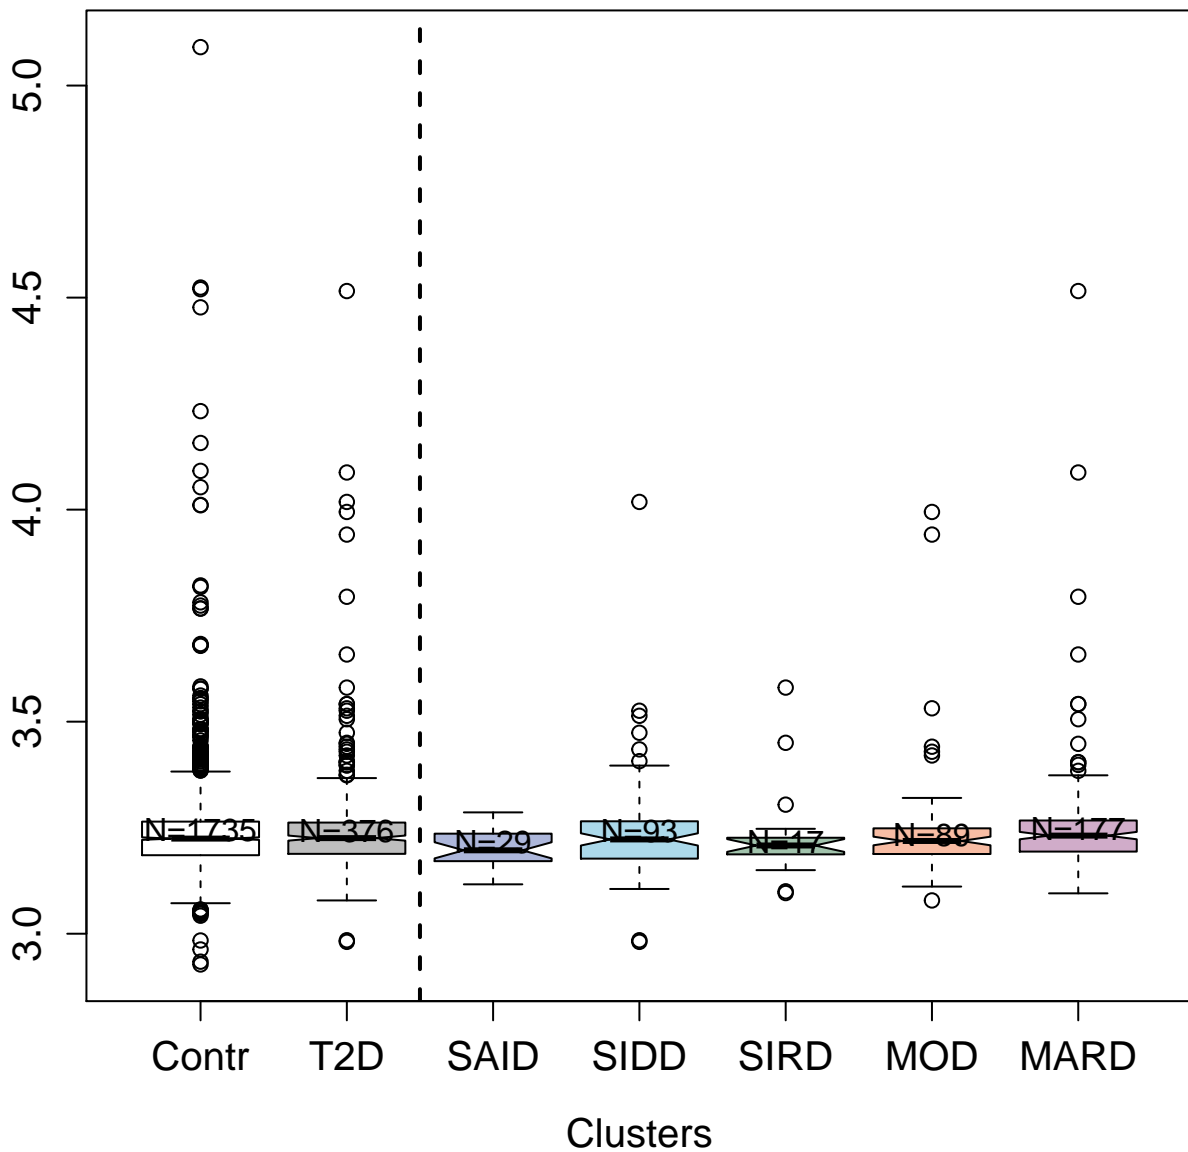

5852-6\_3 : Protein S100-A12

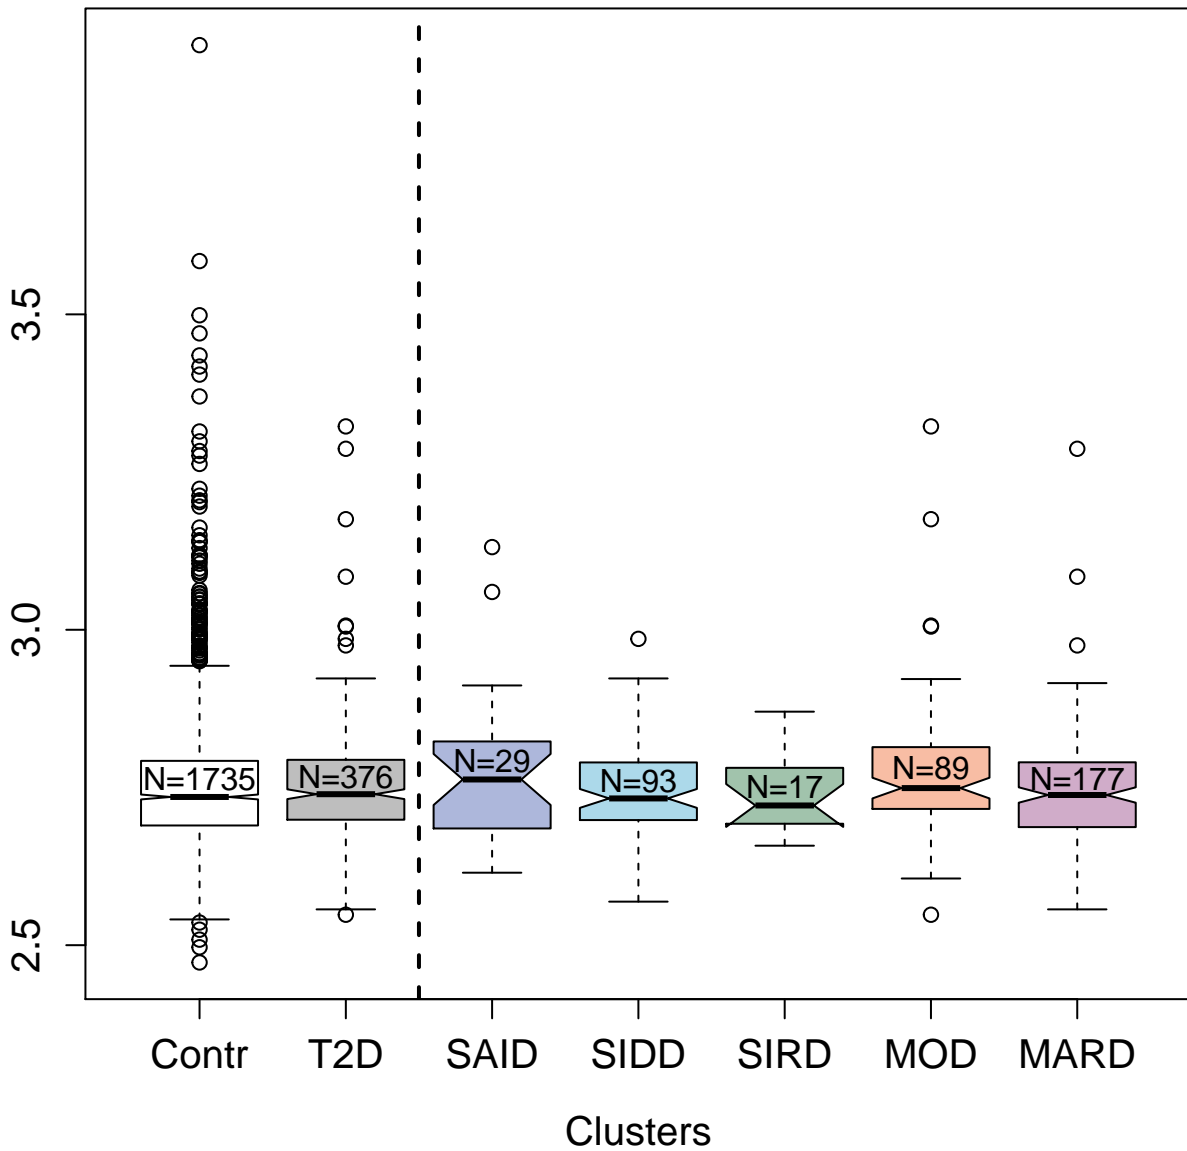

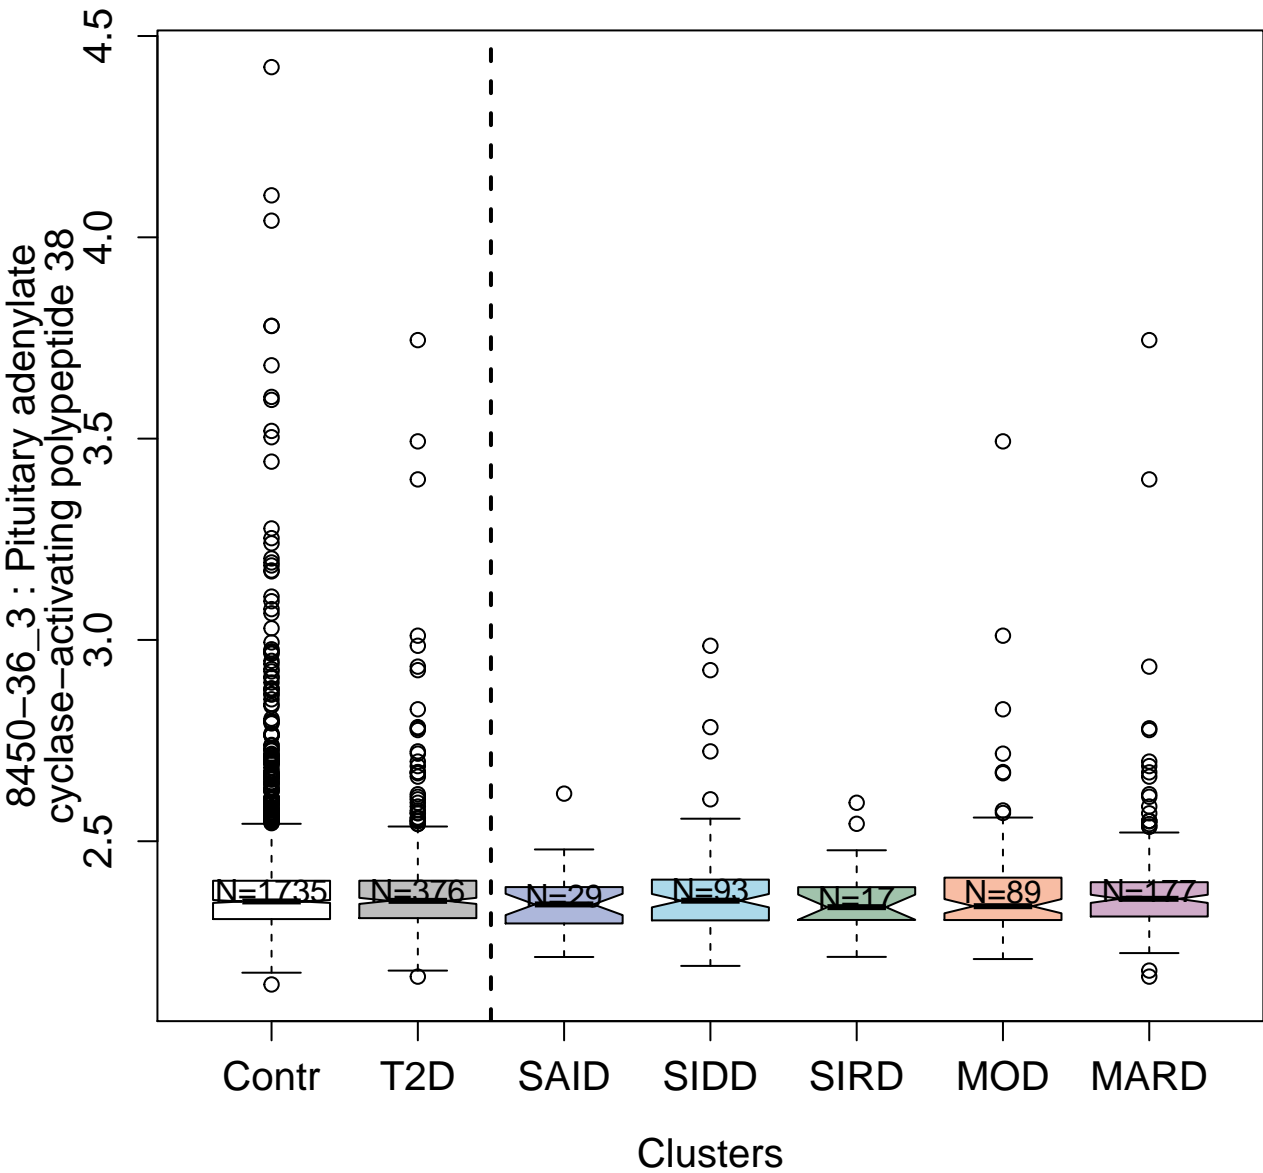

3374-49\_2 : Tyrosine-protein kinase HCK

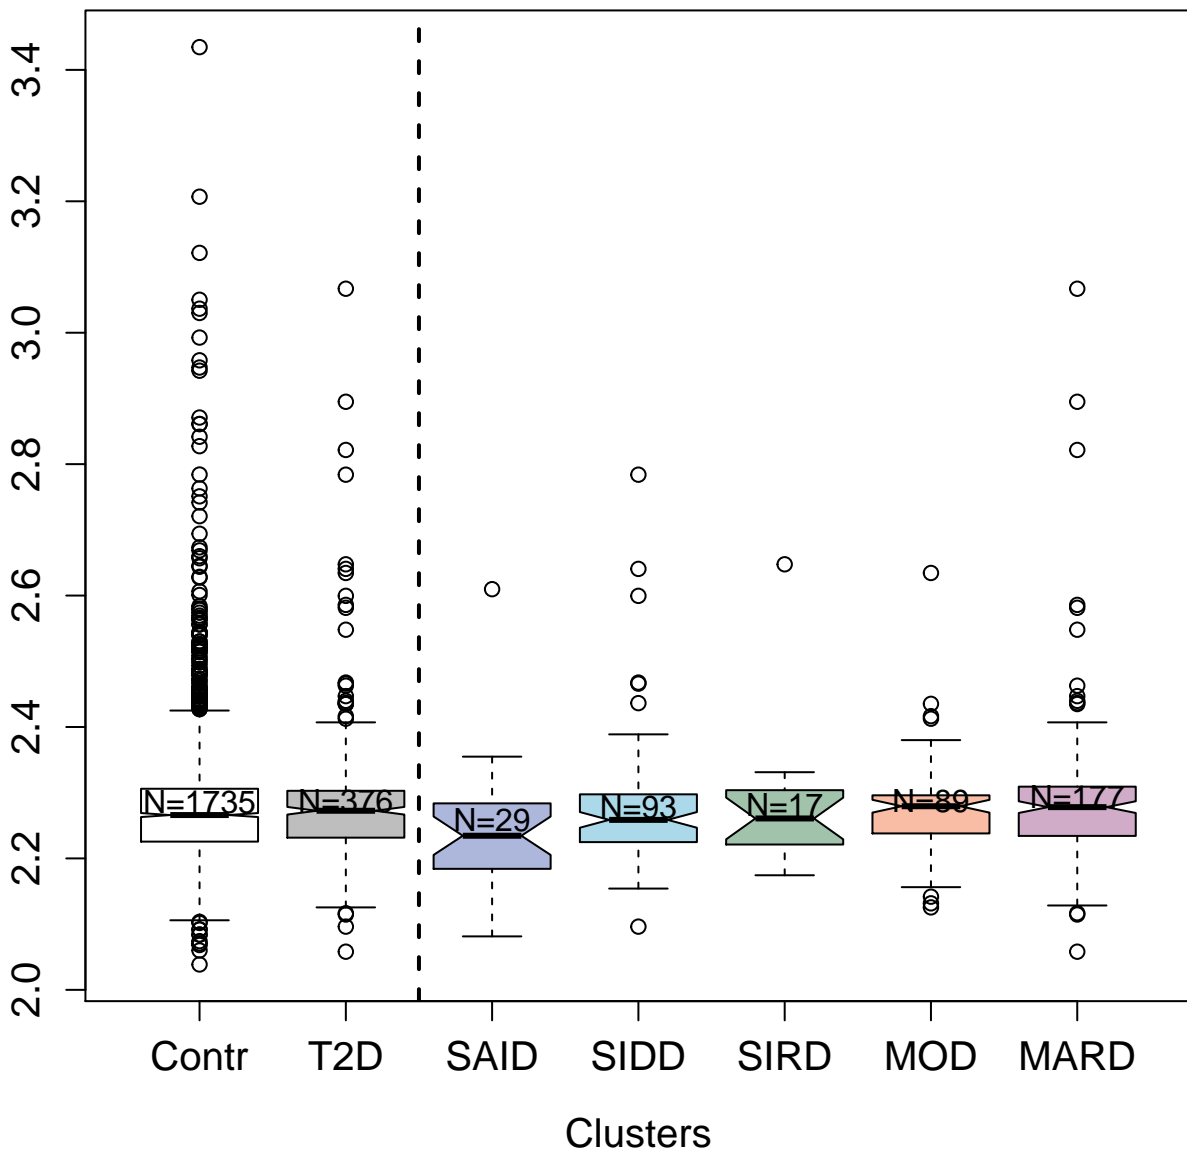



2649-77\_2 : Intercellular adhesion molecule 3

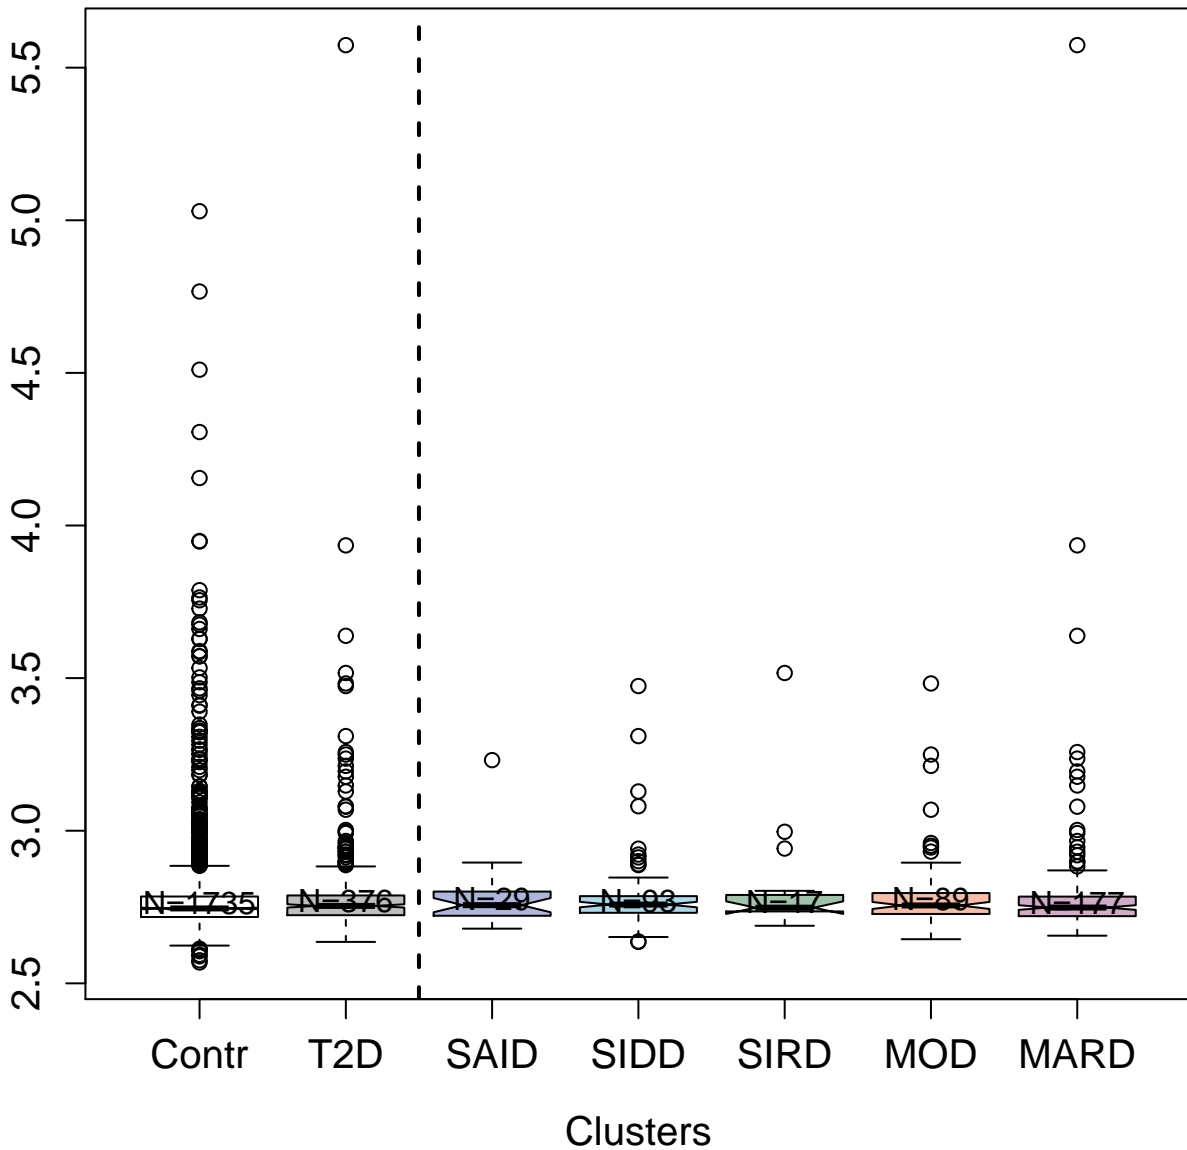

2829-19\_2 : Interleukin-27

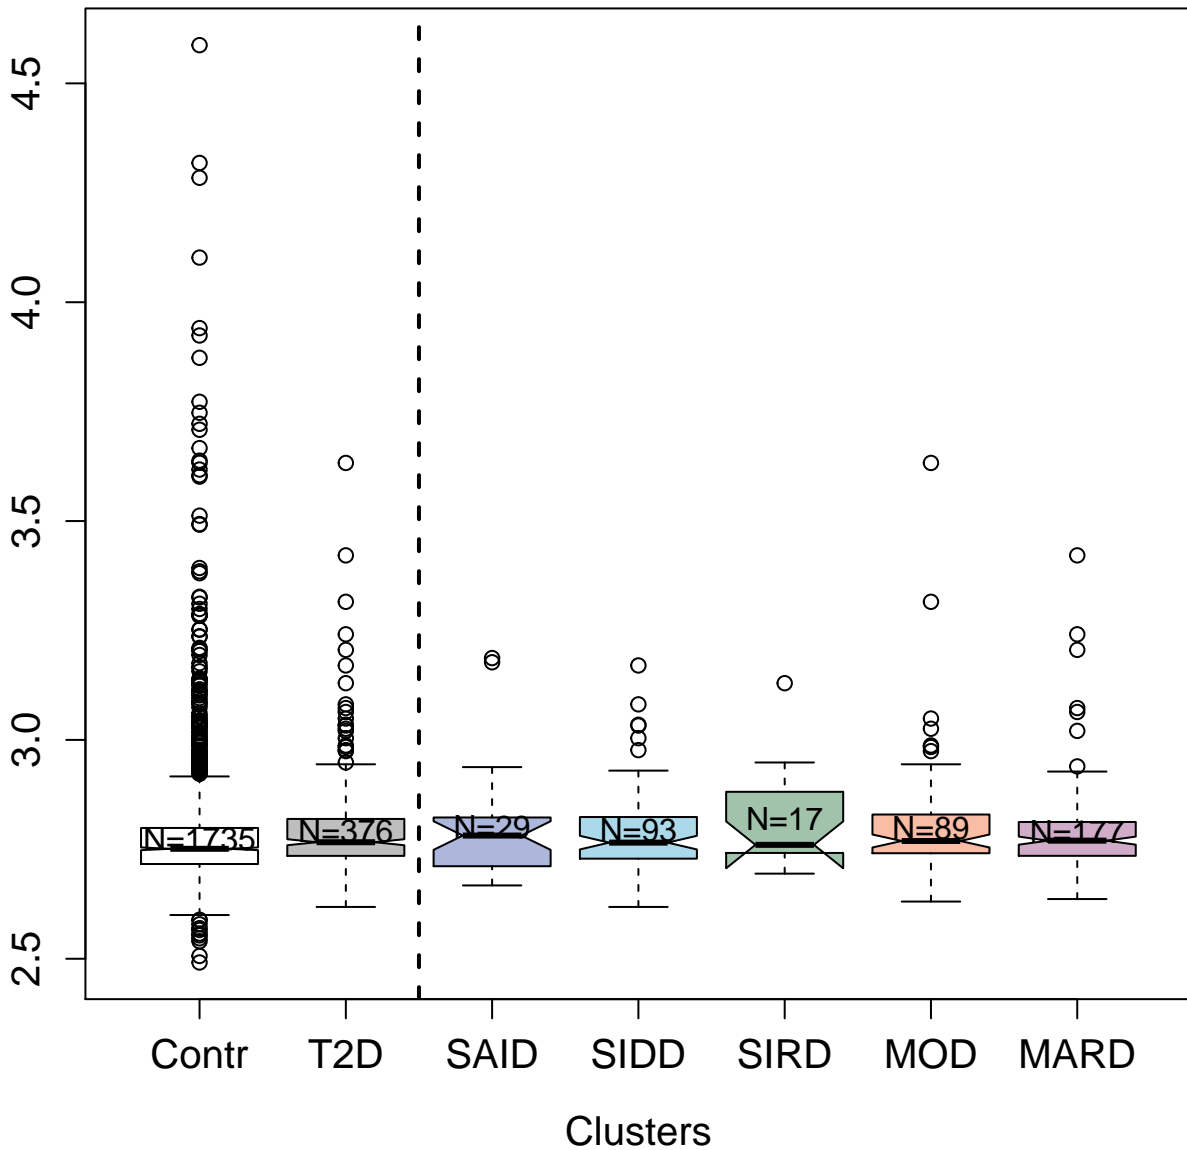

3281-19\_1 : Angiopoietin-related protein 3

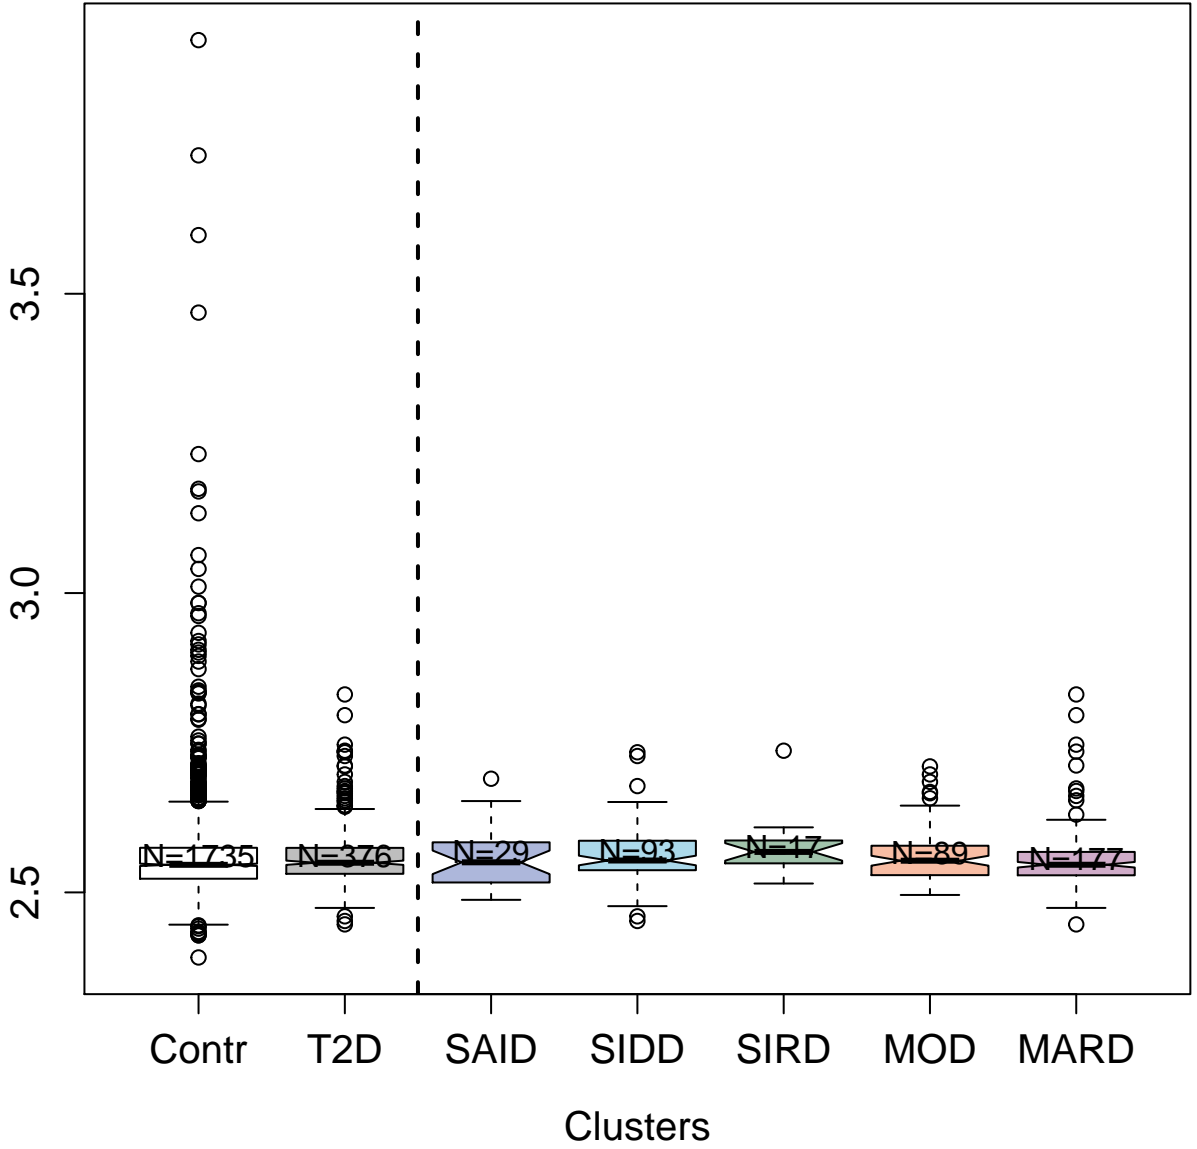

2844-53\_2 : Tyrosine-protein kinase receptor  
Tie-1; soluble

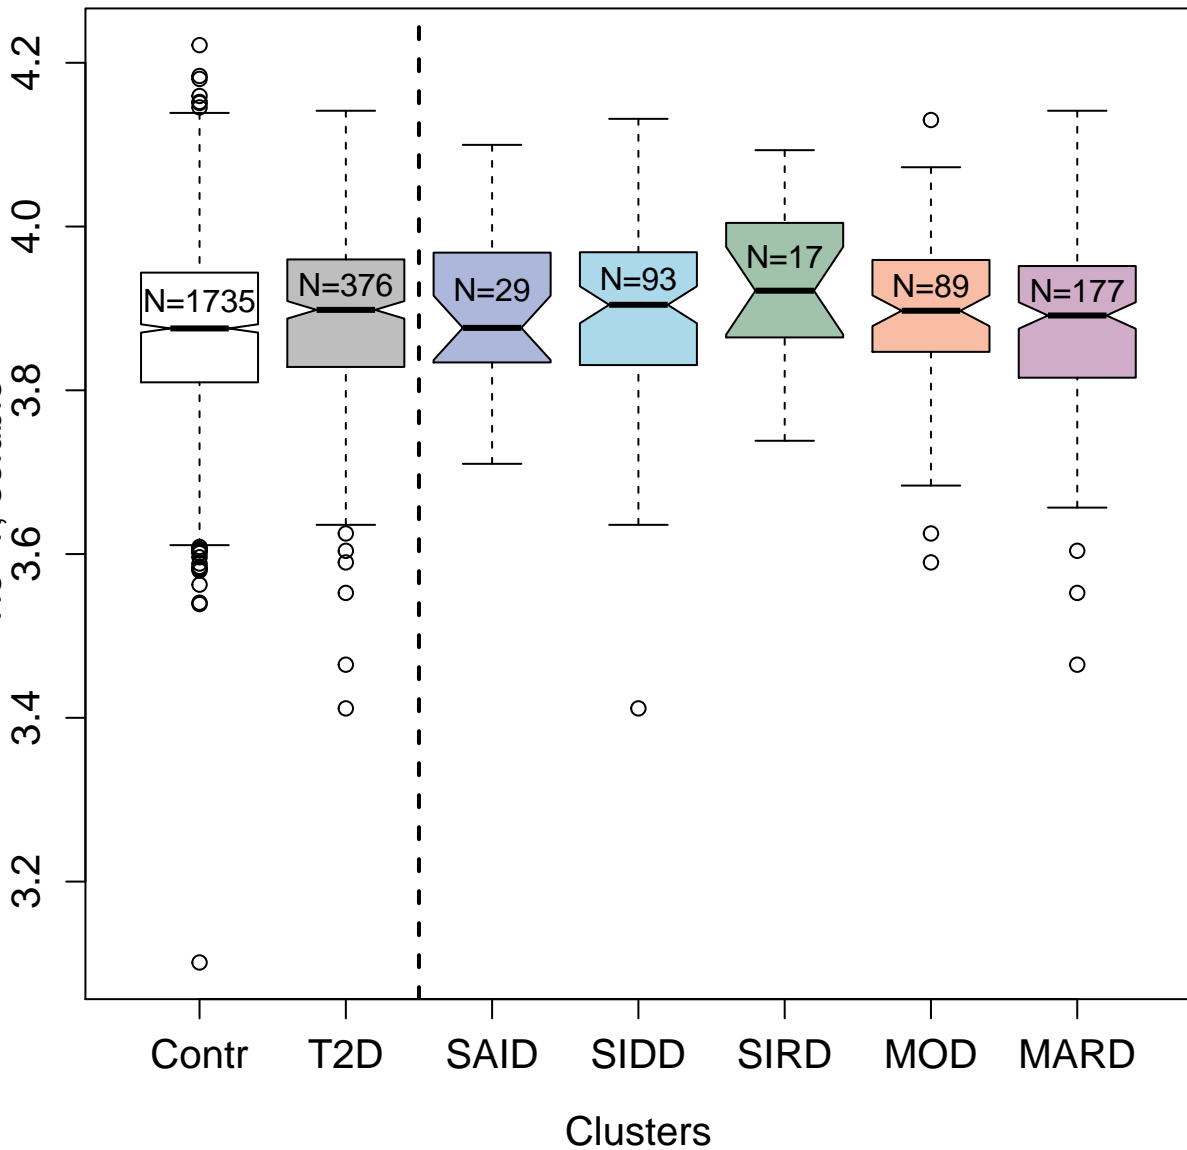

4133-54\_2 : Granzyme B

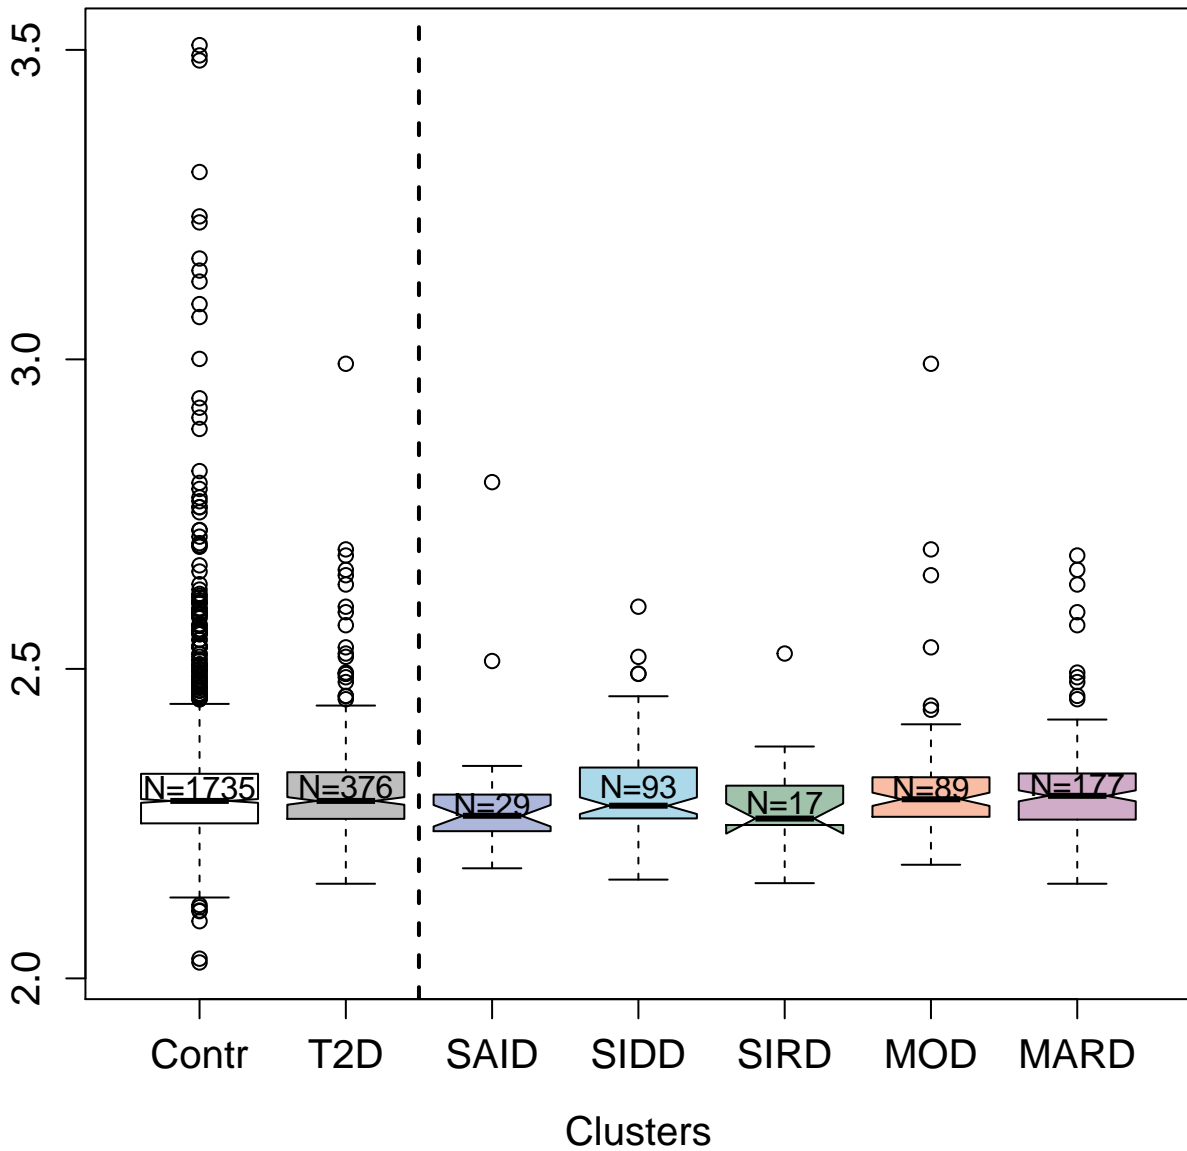

4480-59\_2 : Complement C3b

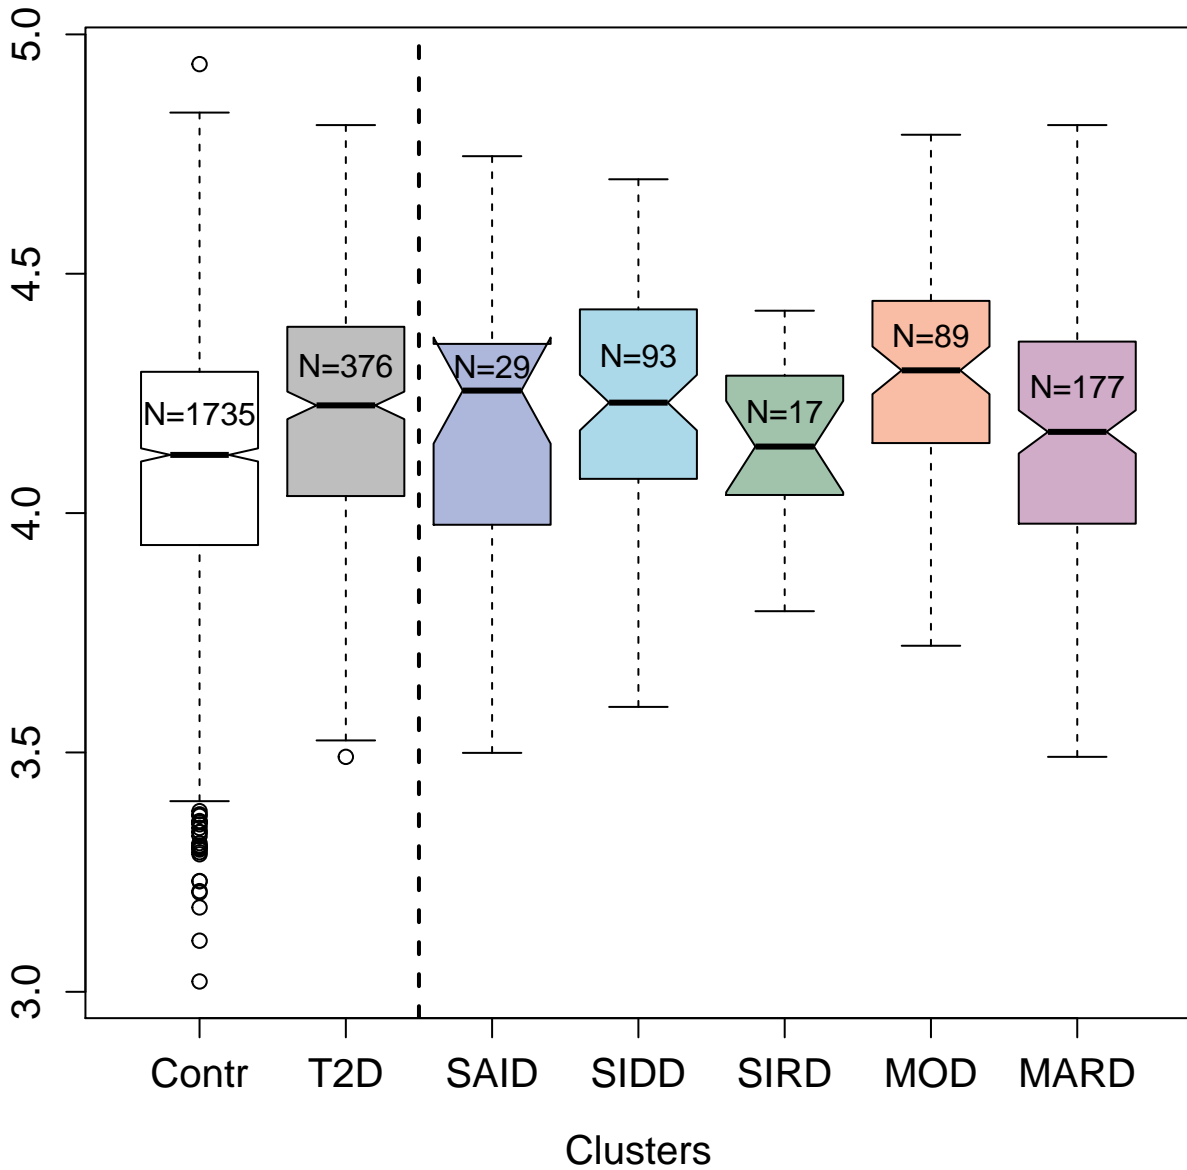

3352-80\_3 : Carbonic anhydrase 6

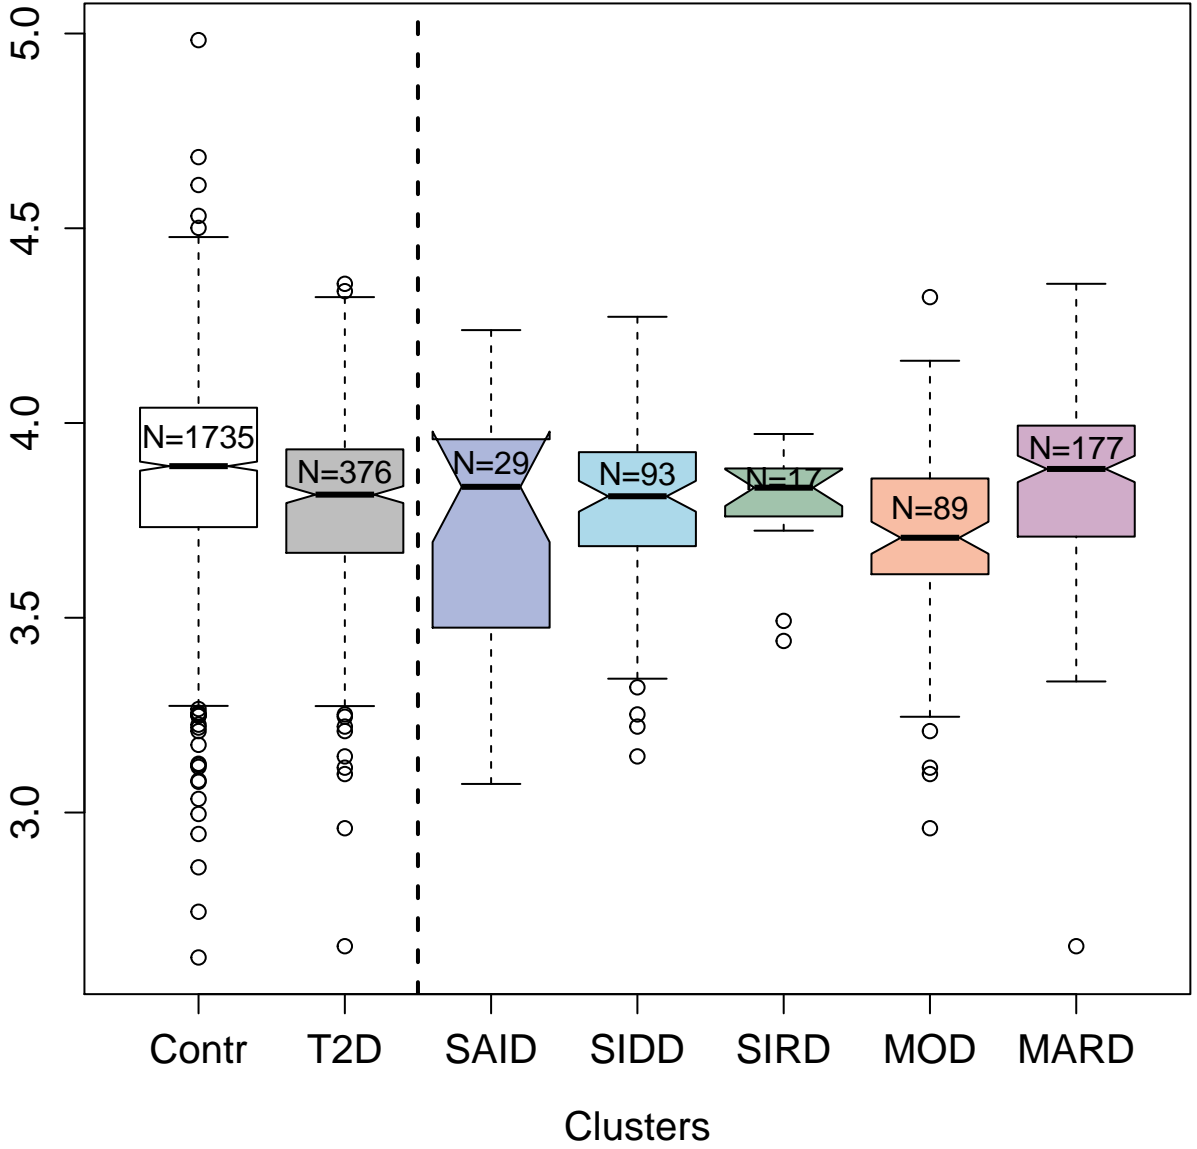

3719-2\_2 : Cyclin-dependent kinase inhibitor 1B

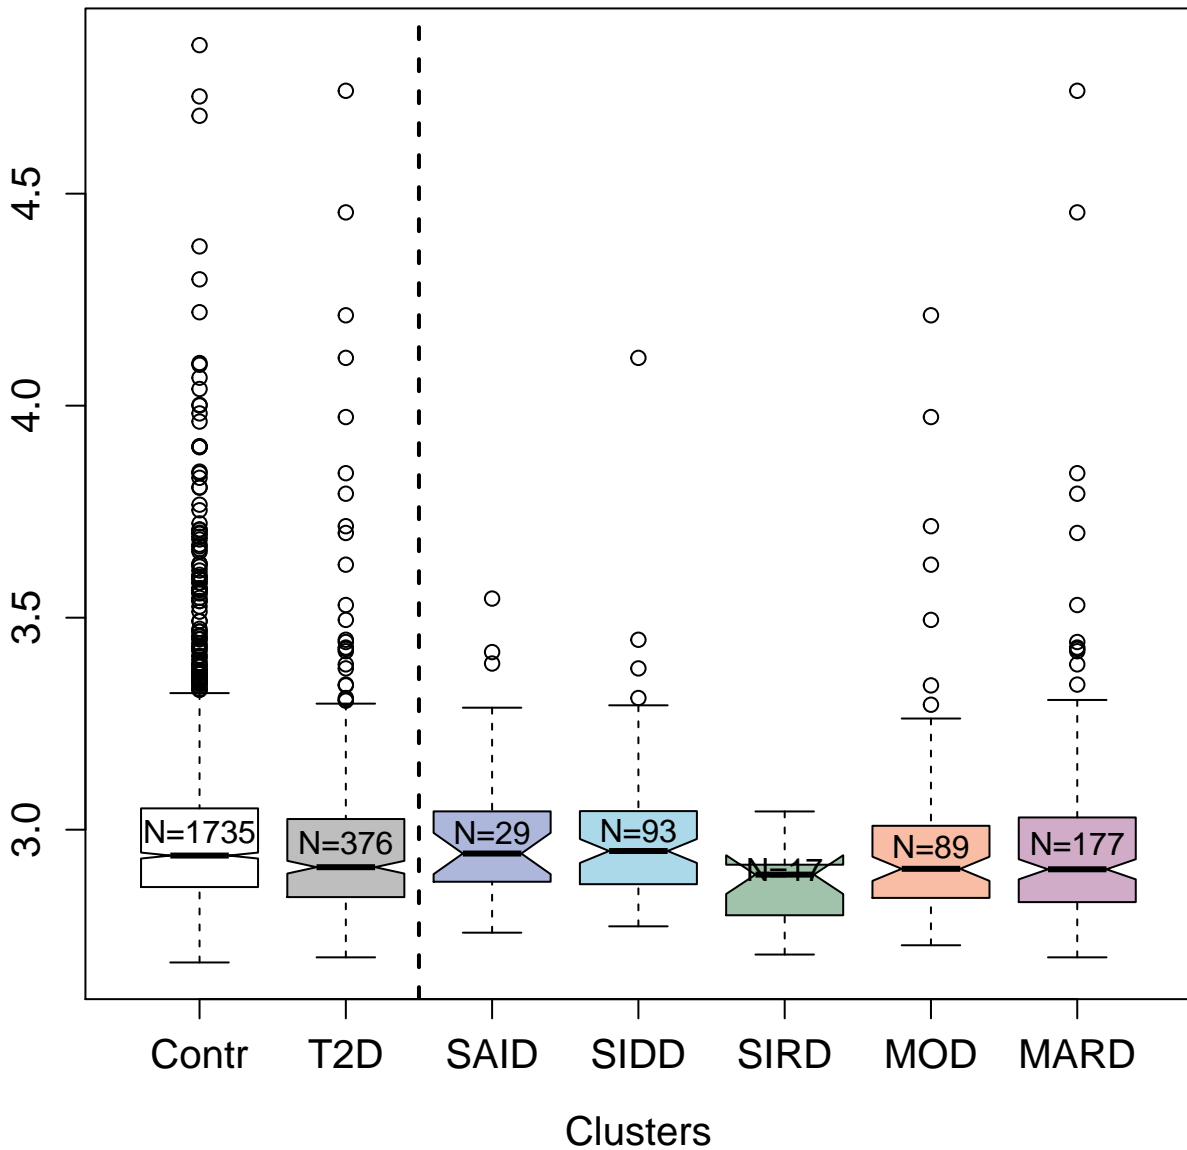



3404-51\_2 : Tryptase gamma

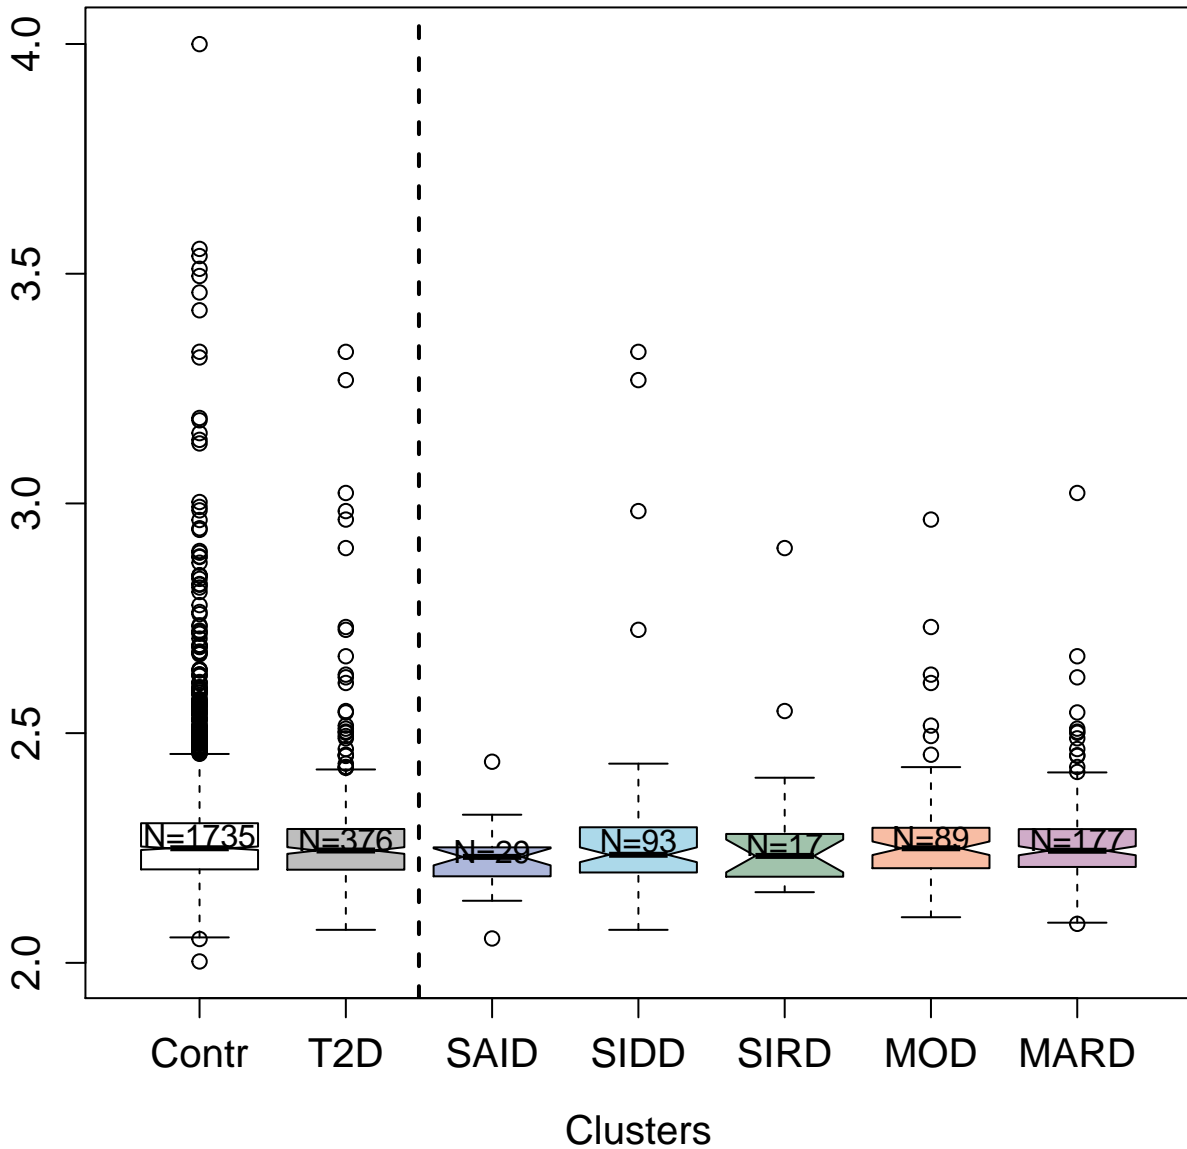

3078-1\_2 : Placenta growth factor

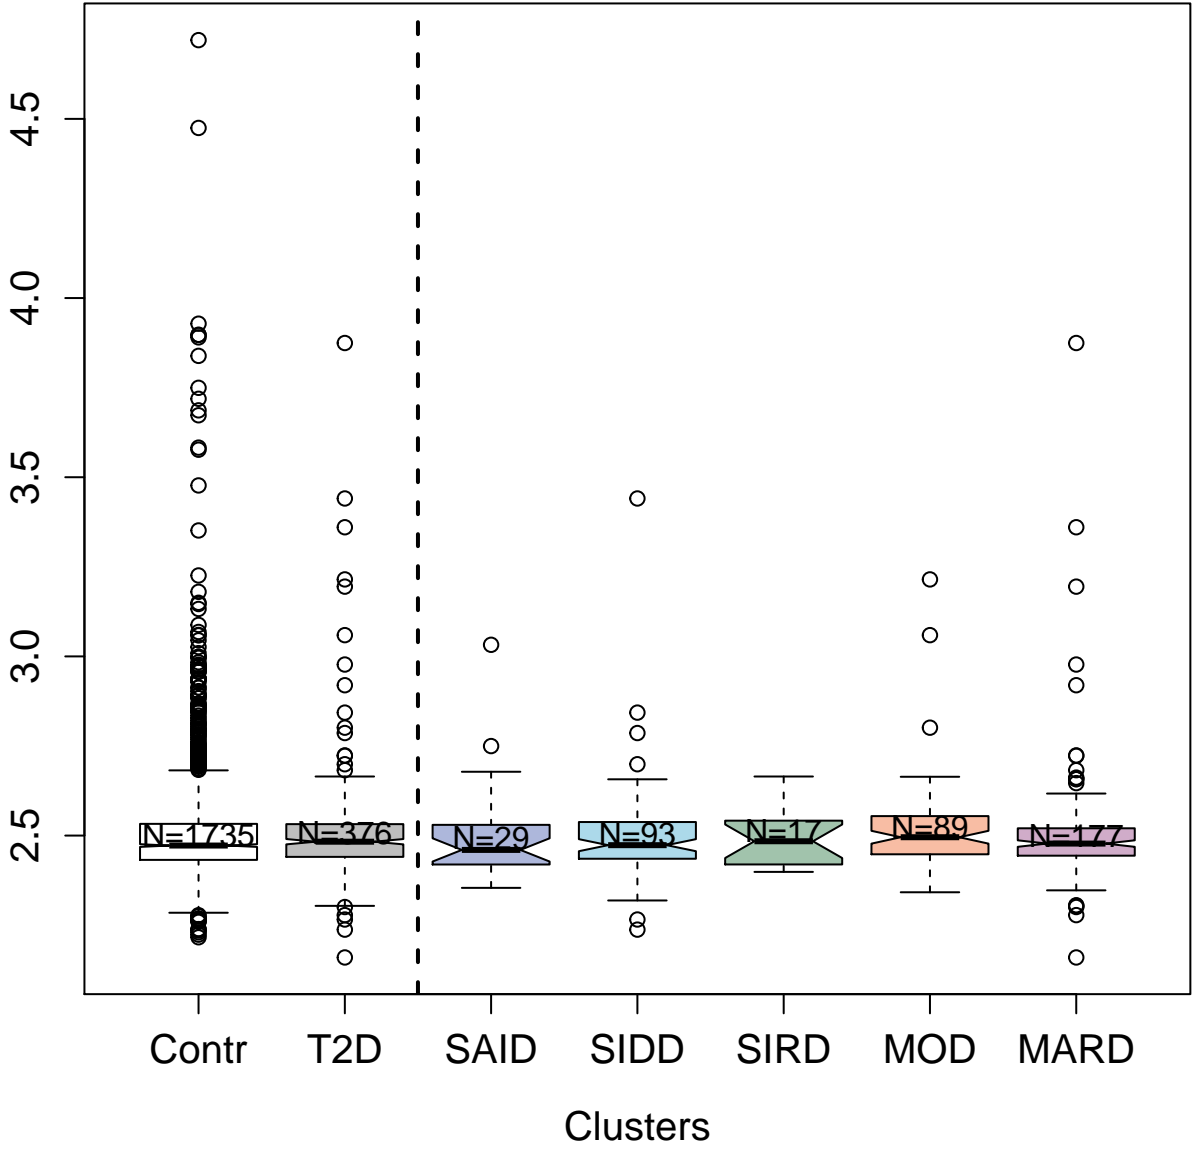

5509-7\_3 : Epidermal growth factor

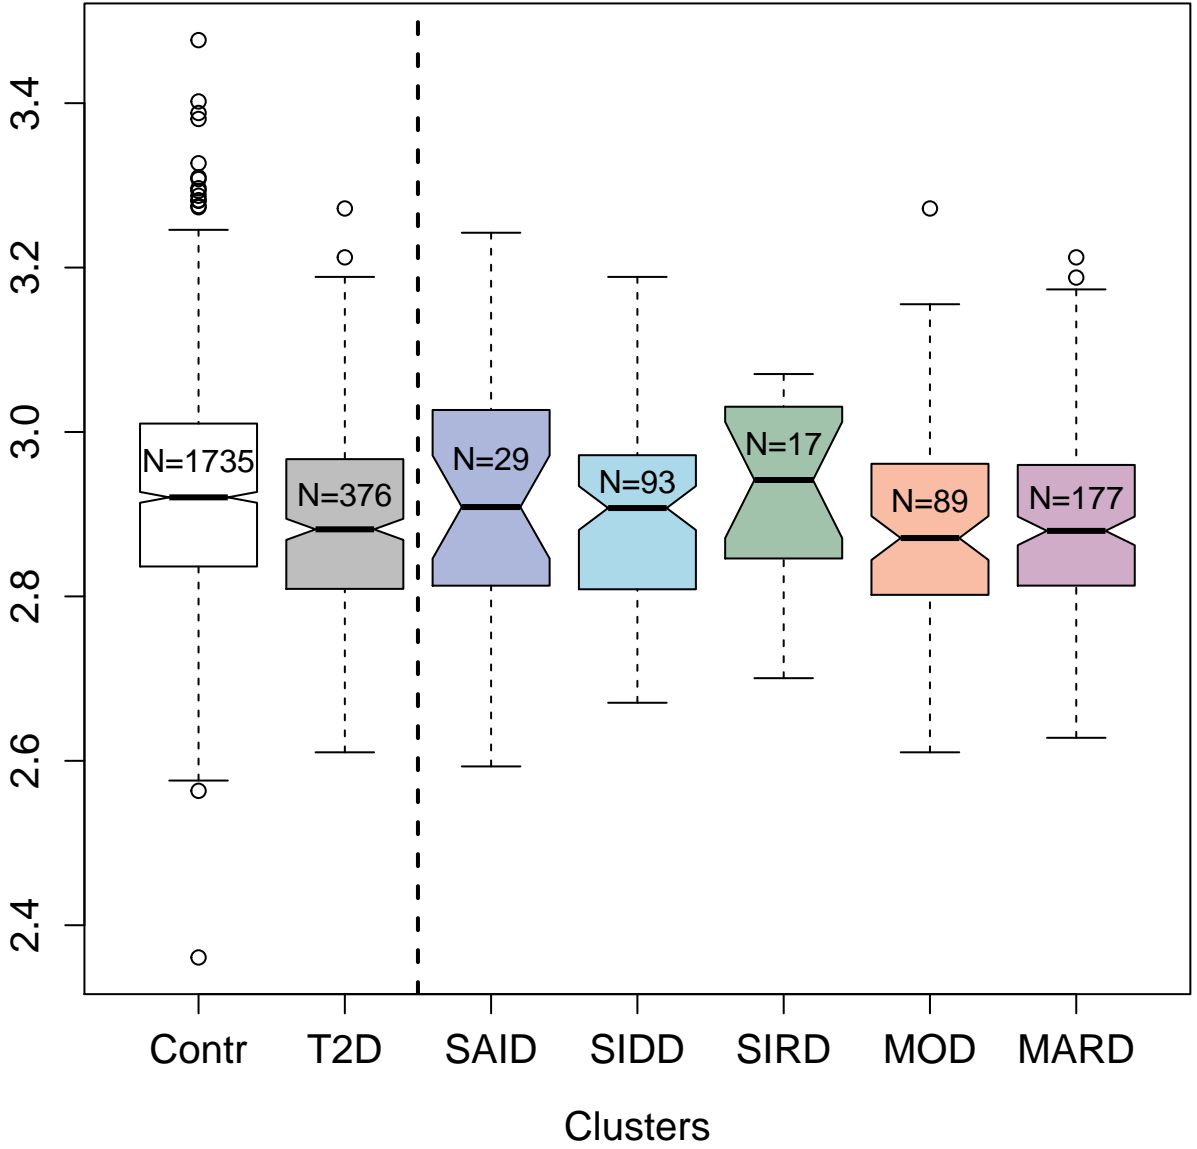

4832-75\_2 : Tumor necrosis factor receptor  
superfamily member 10A

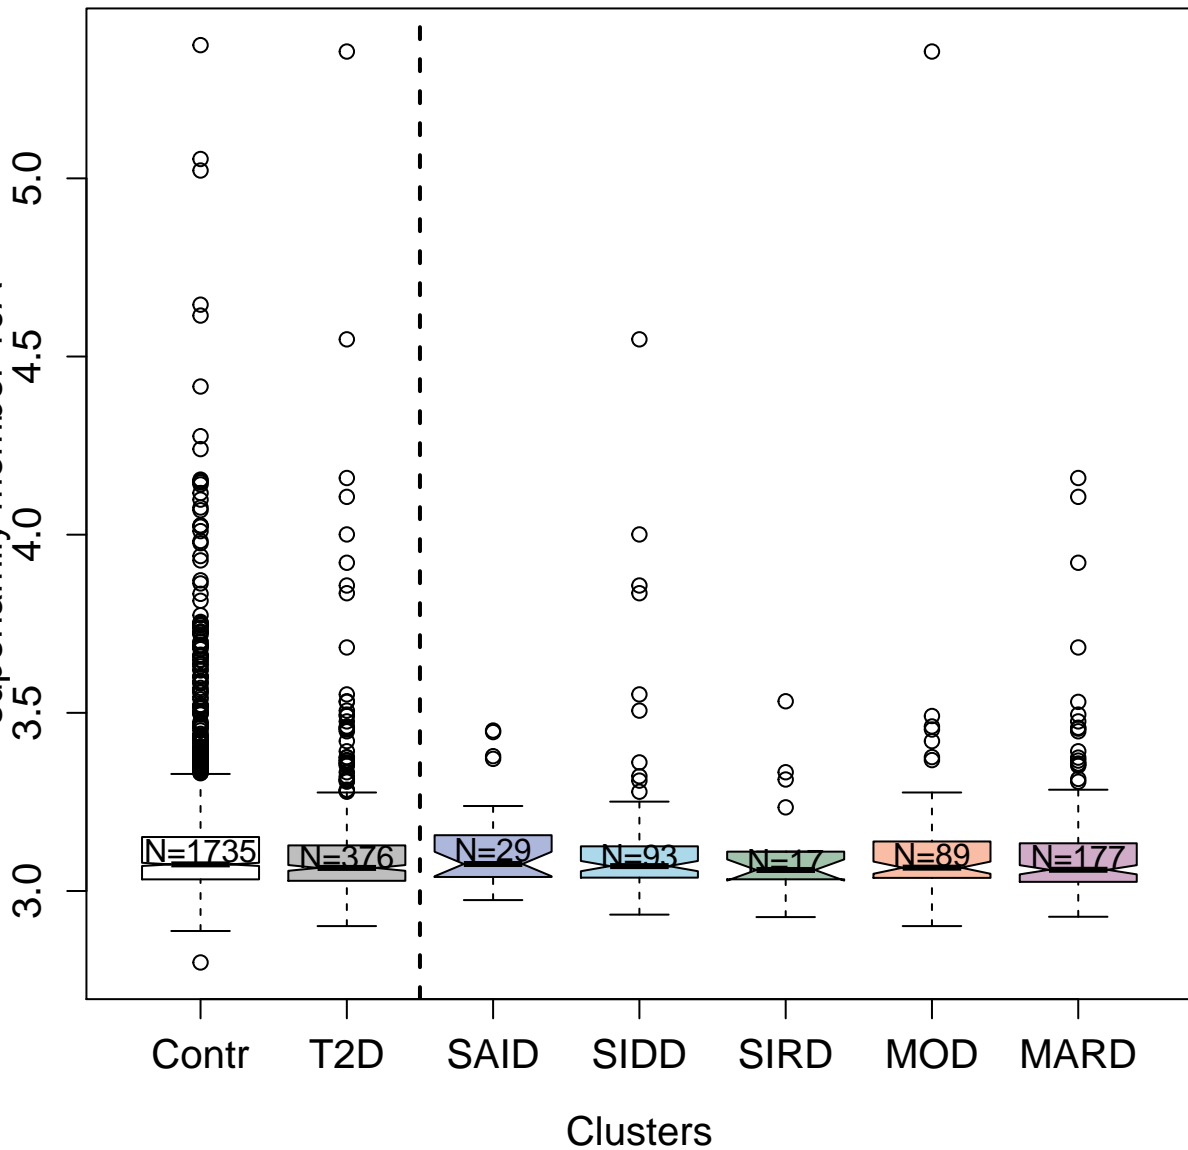

6152-111\_3 : Cellular tumor antigen p53

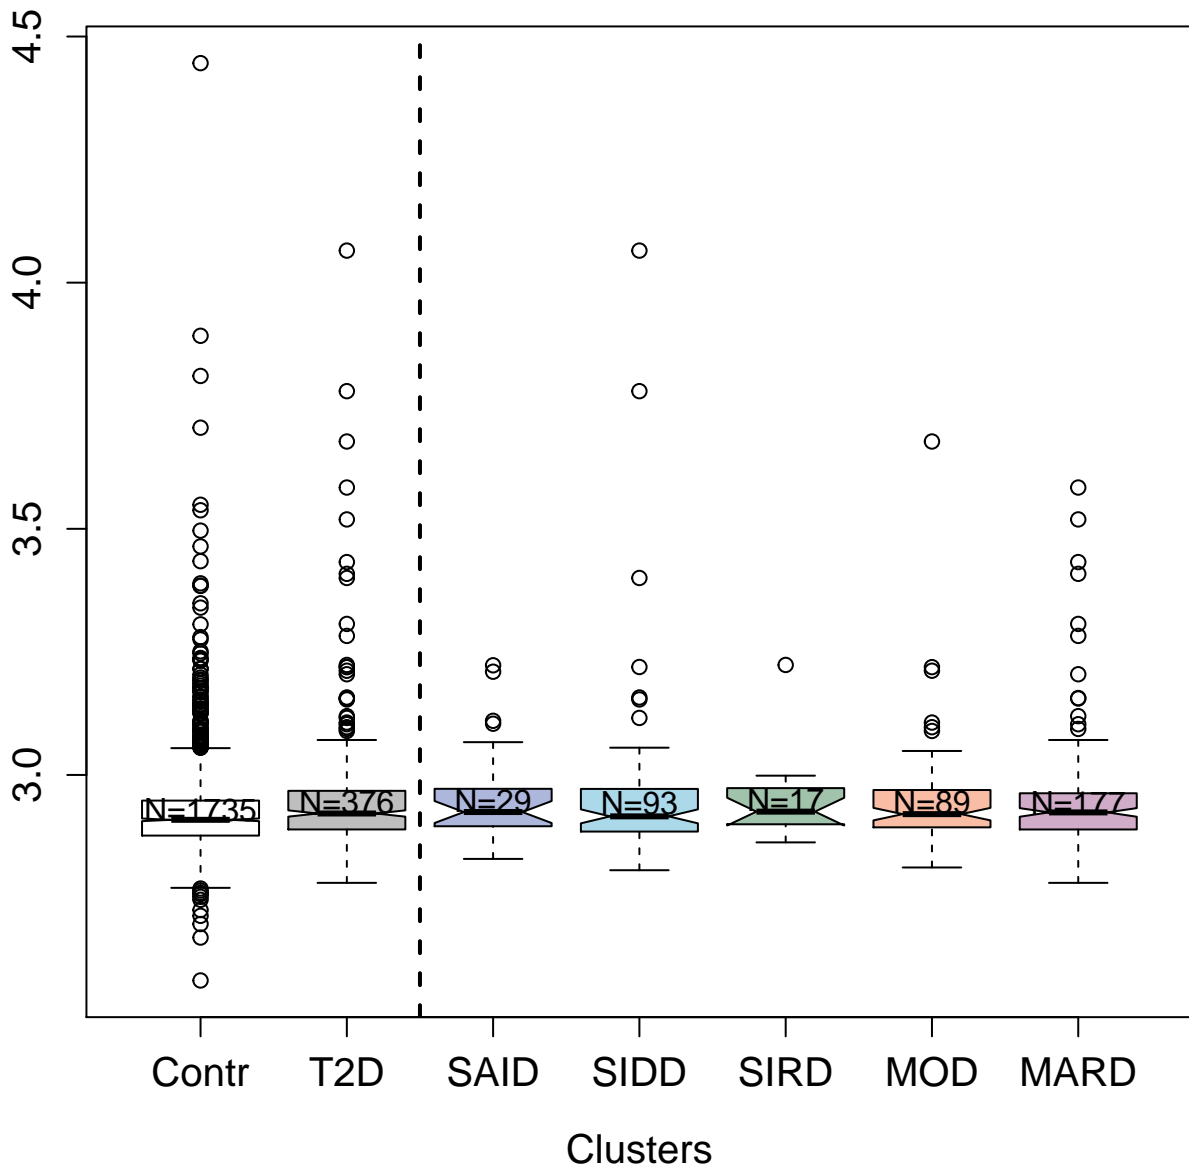

4440-15\_2 : Fc receptor-like protein 3

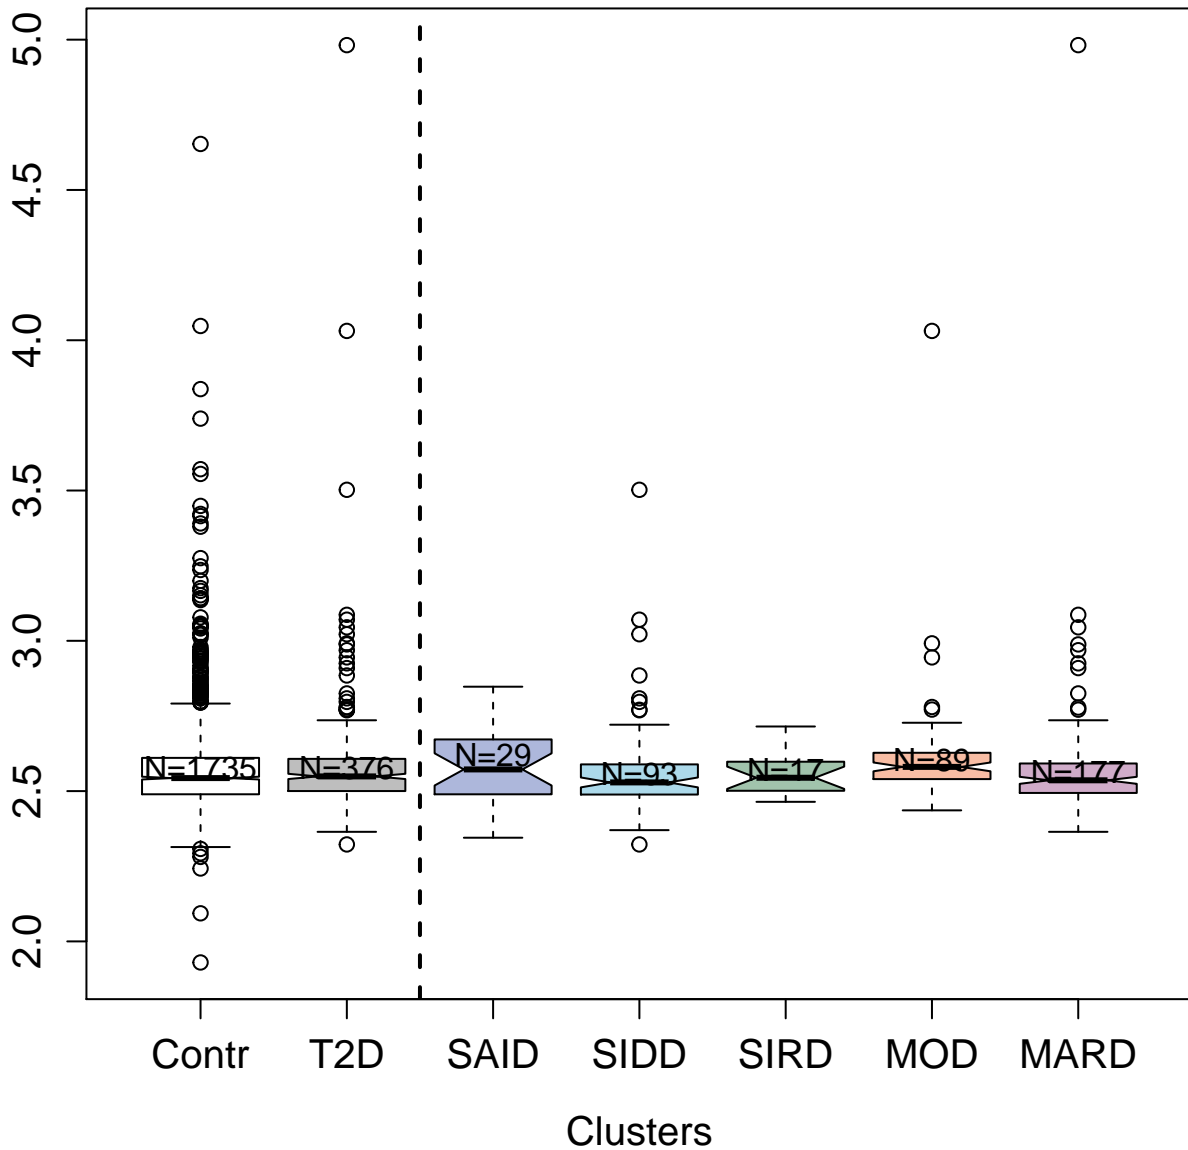

2421-7\_3 : Brain-derived neurotrophic factor

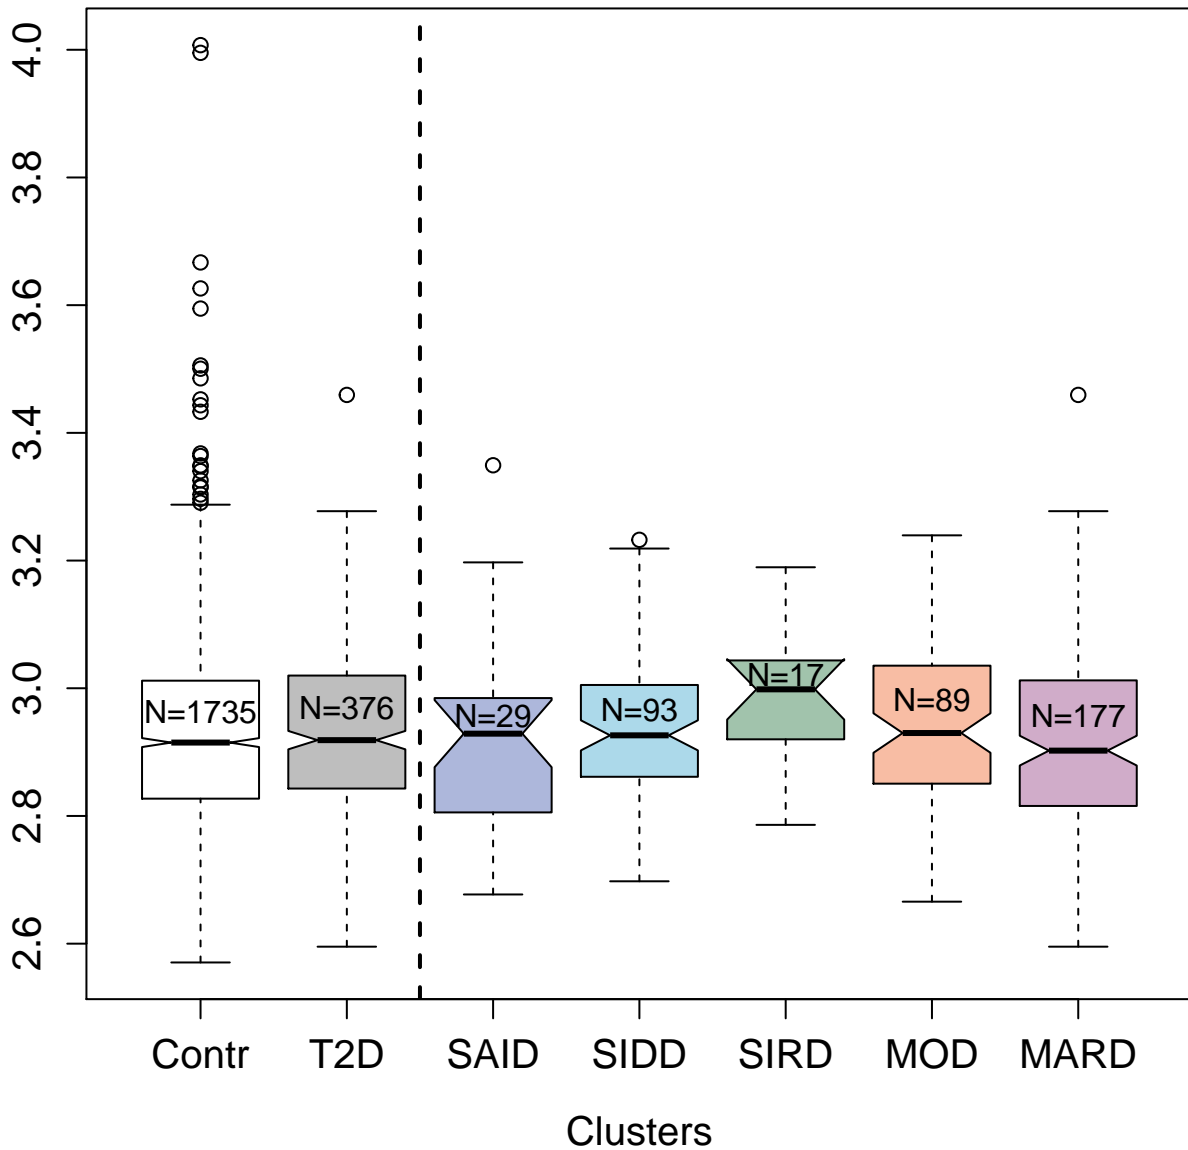

11067-13\_3 : Osteocalcin

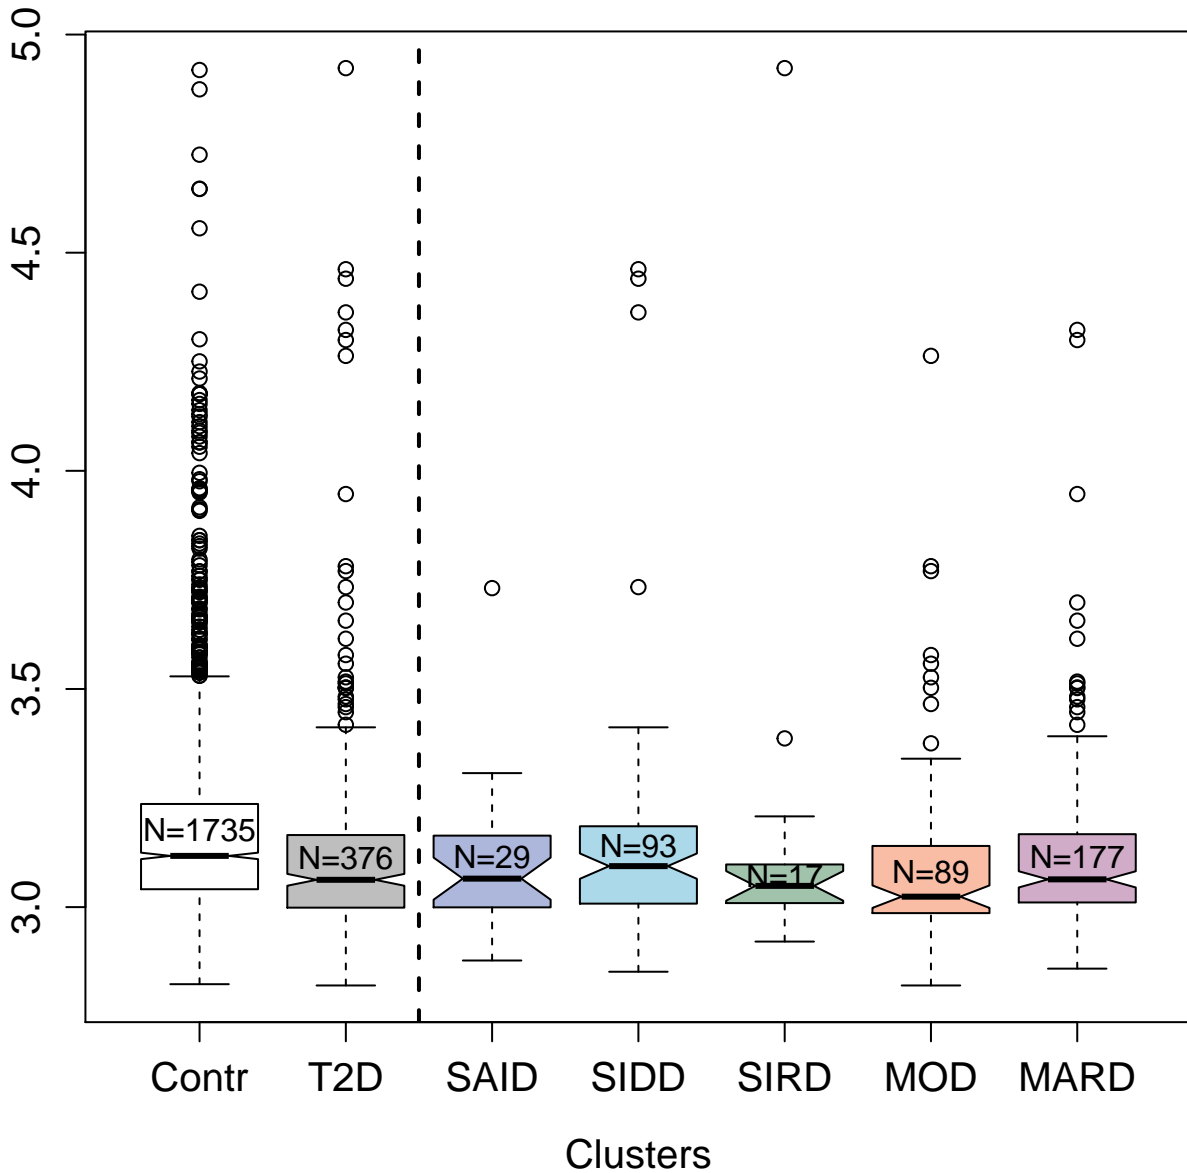



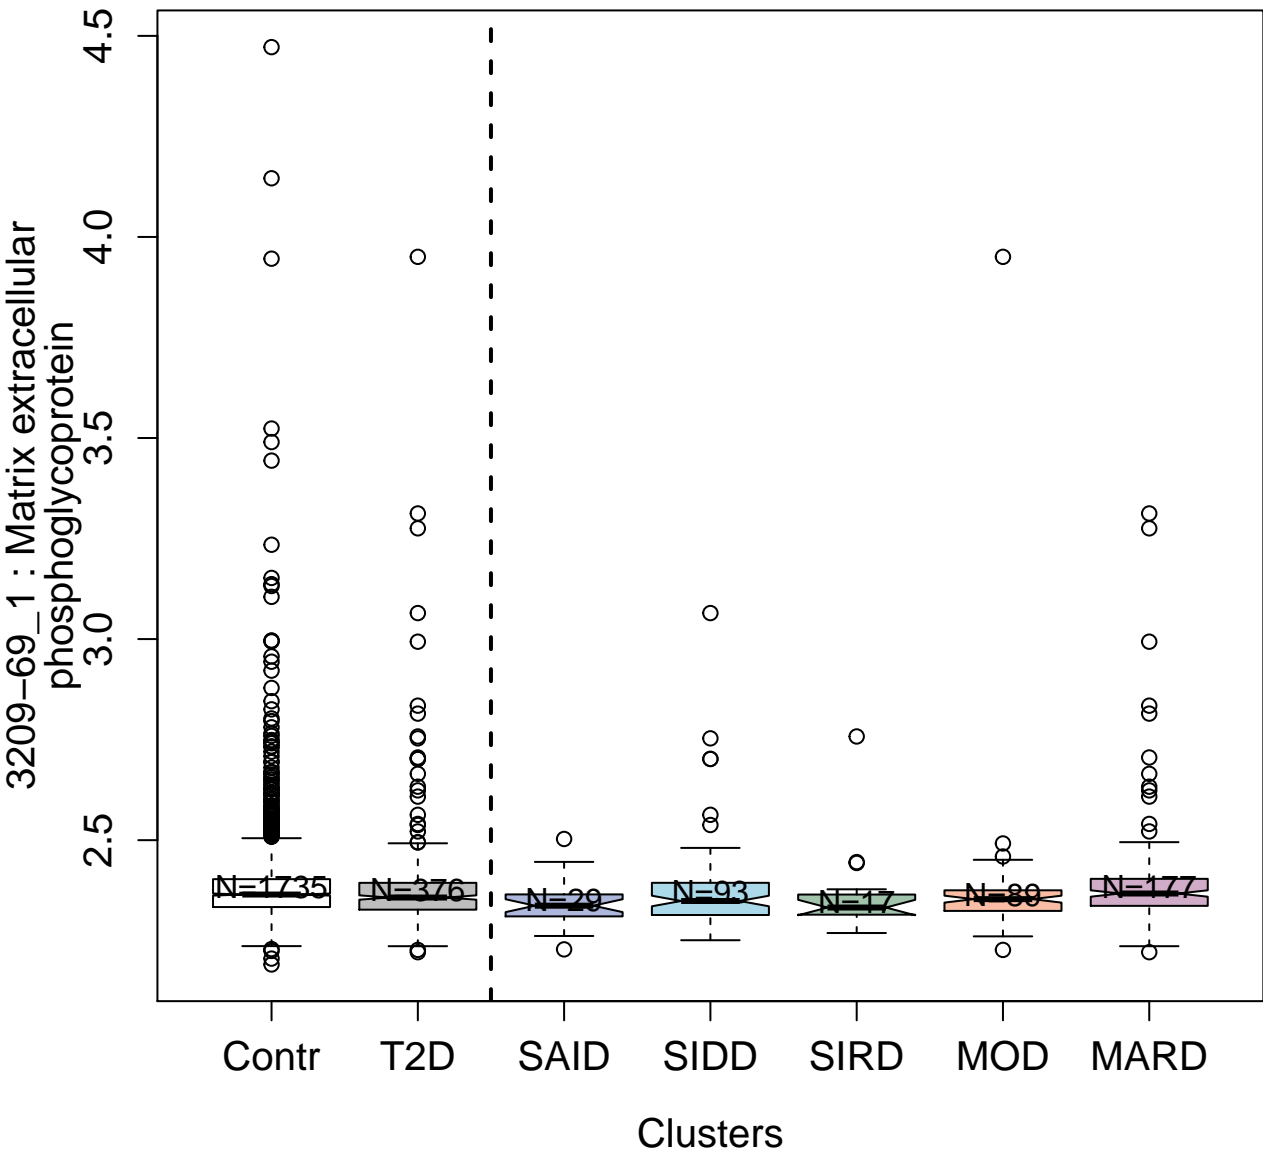

5026-66\_1 : 40S ribosomal protein S3

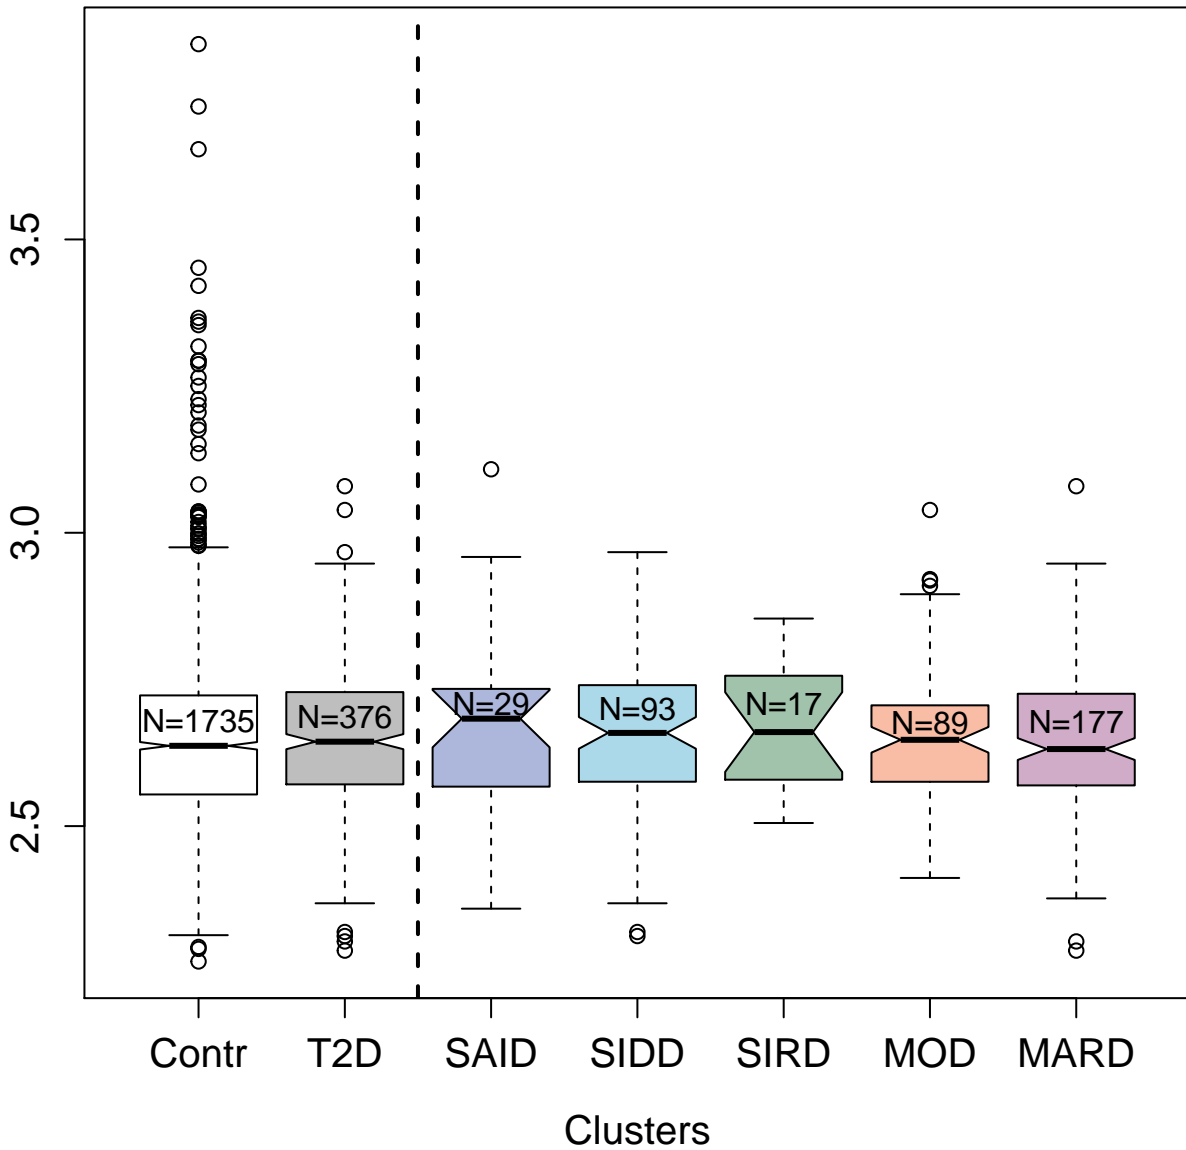

5354-11\_3 : Keratin; type I cytoskeletal 18

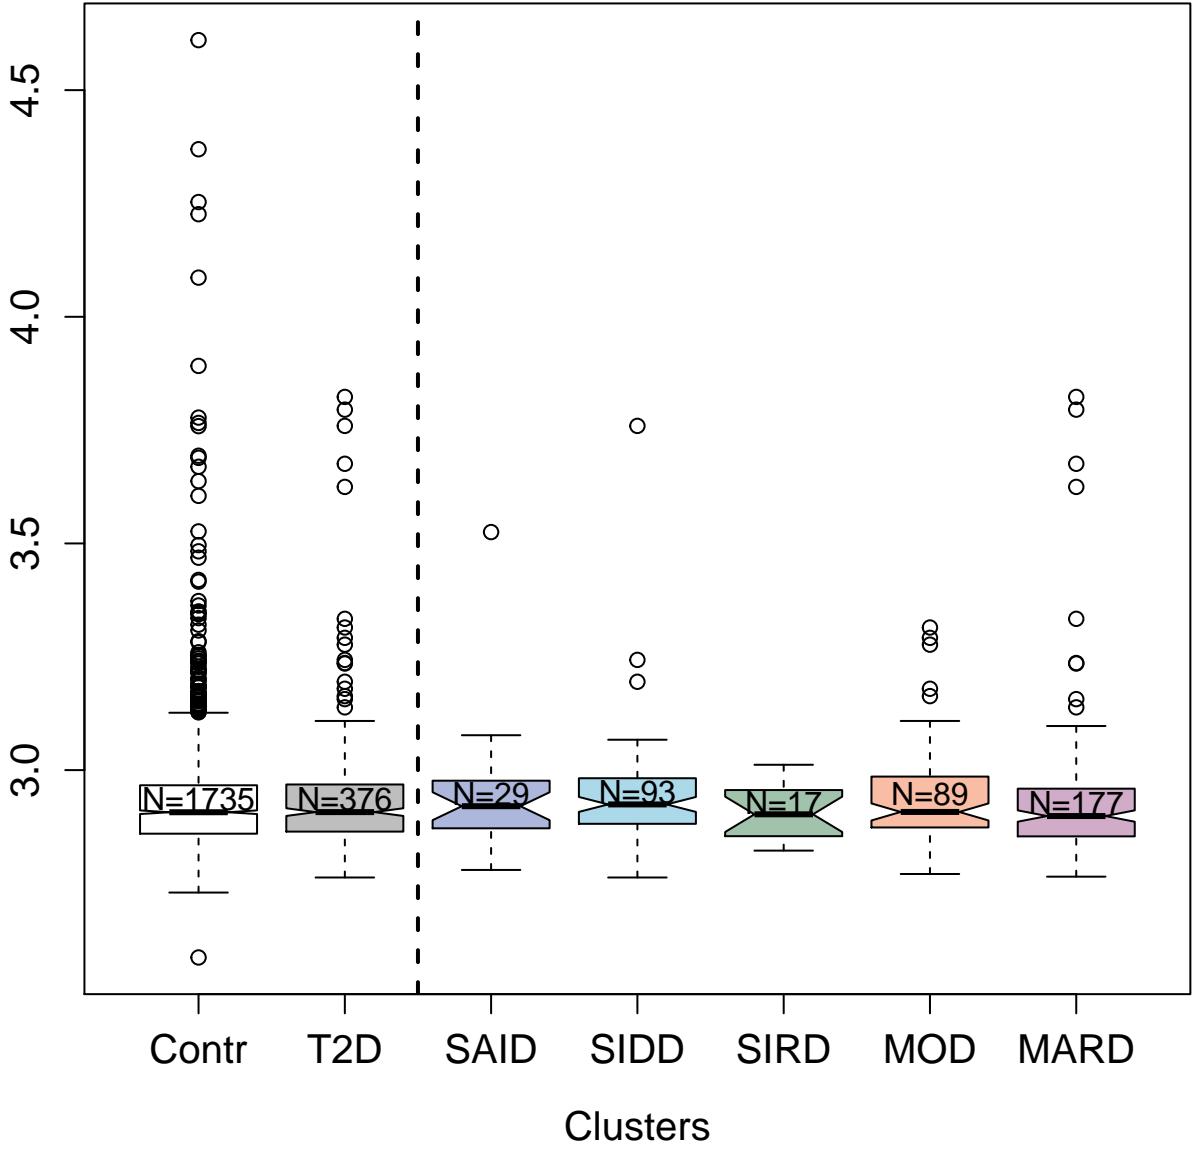

14135-3\_3 : Relaxin receptor 1

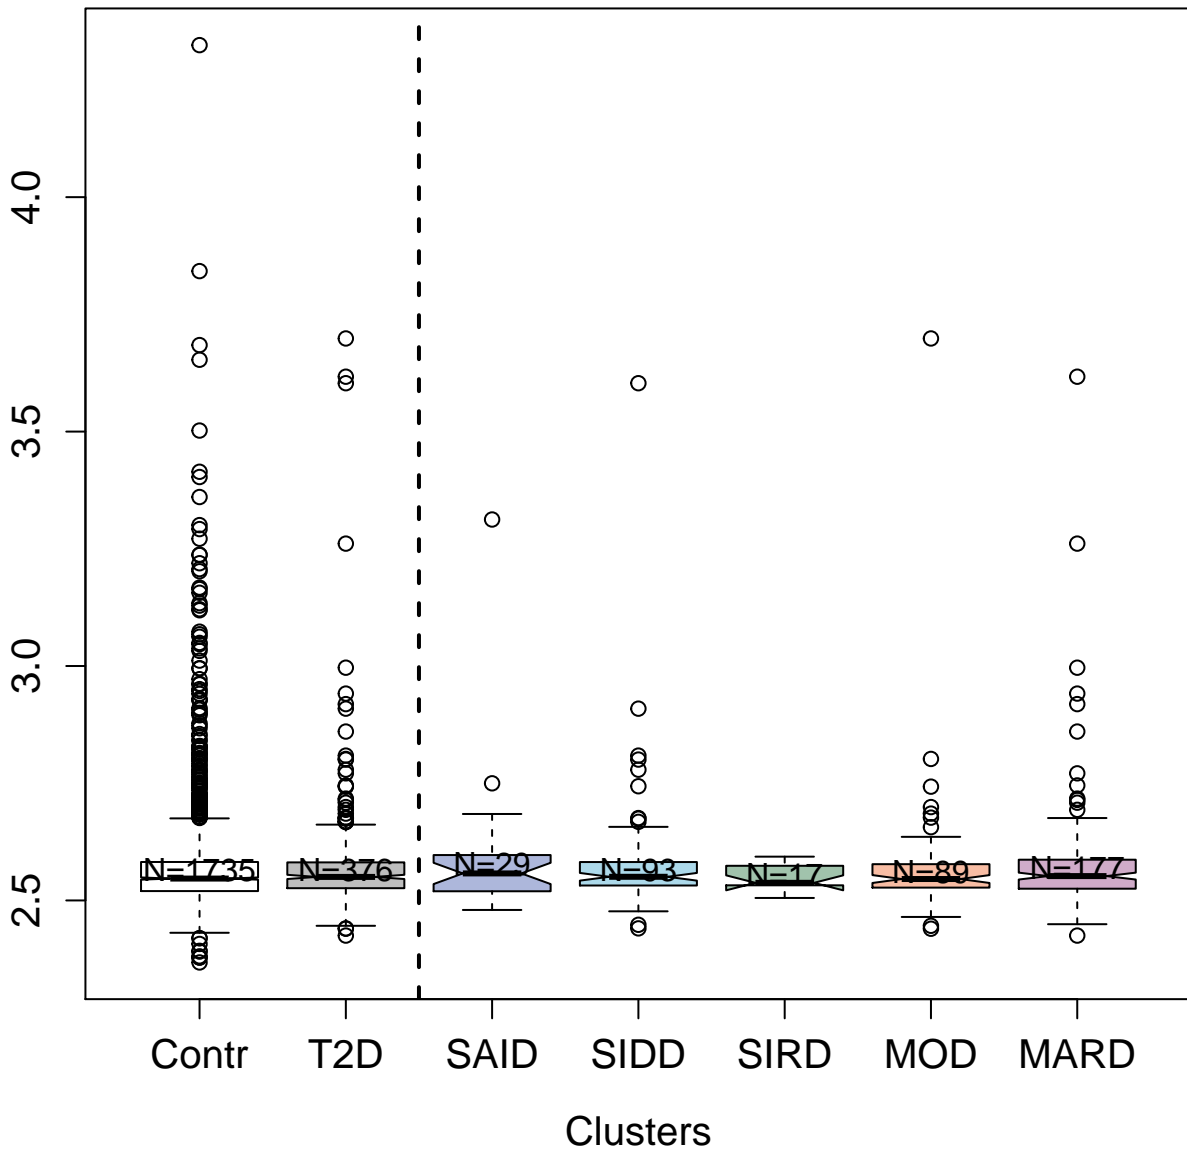

3178-5\_2 : Dipeptidyl peptidase 1

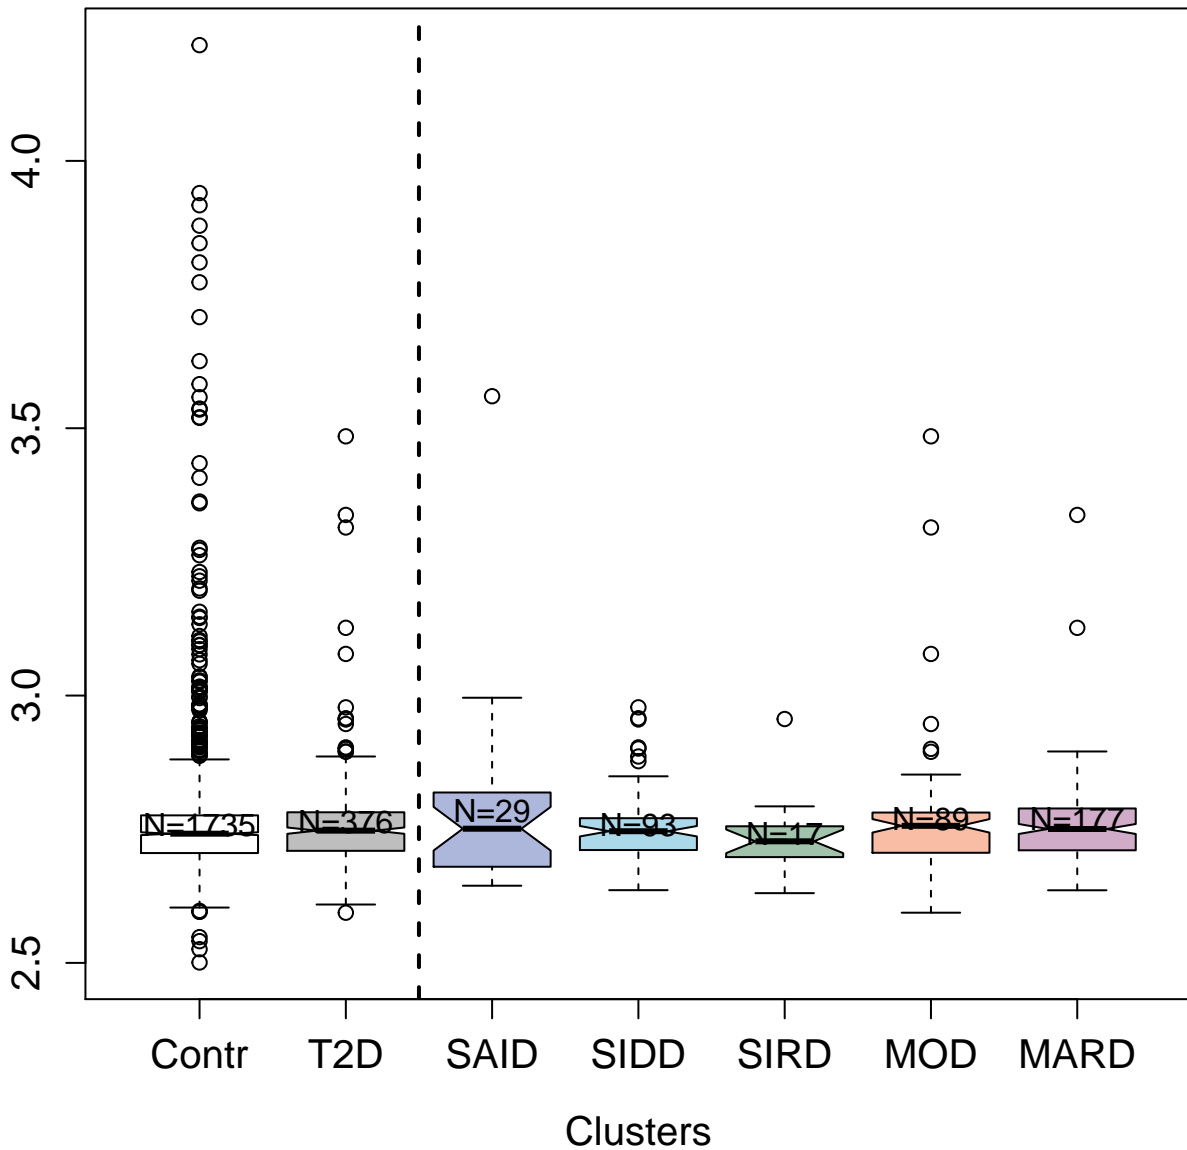

# 5193-51\_3: GTPase KRas

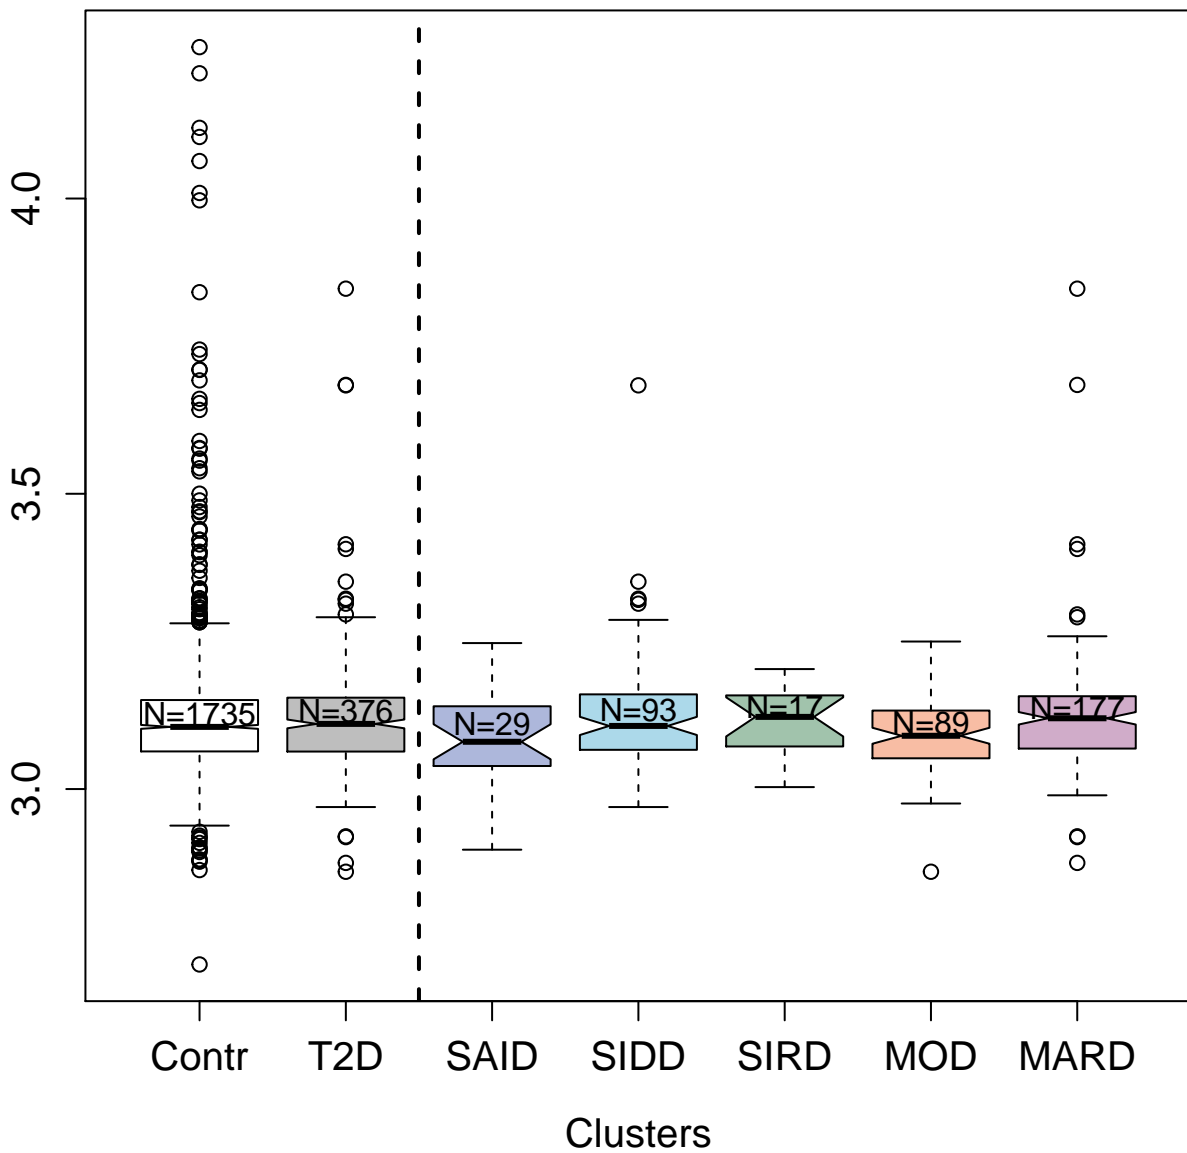

9213-24\_3 : Formimidoyltransferase-cyclodeaminase

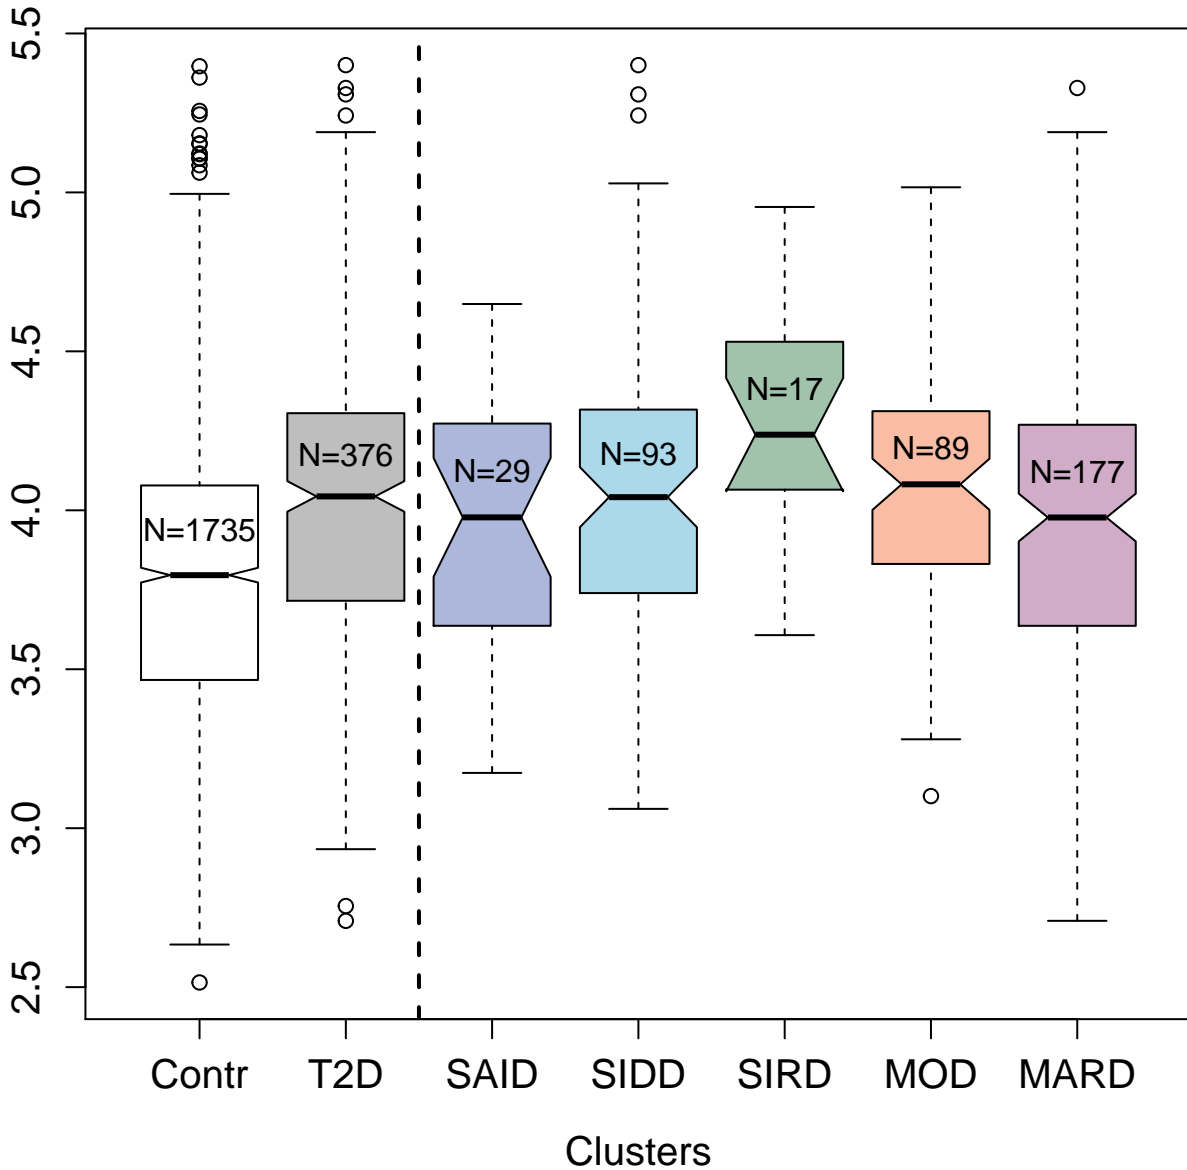

4138-25\_2 : Interleukin-20

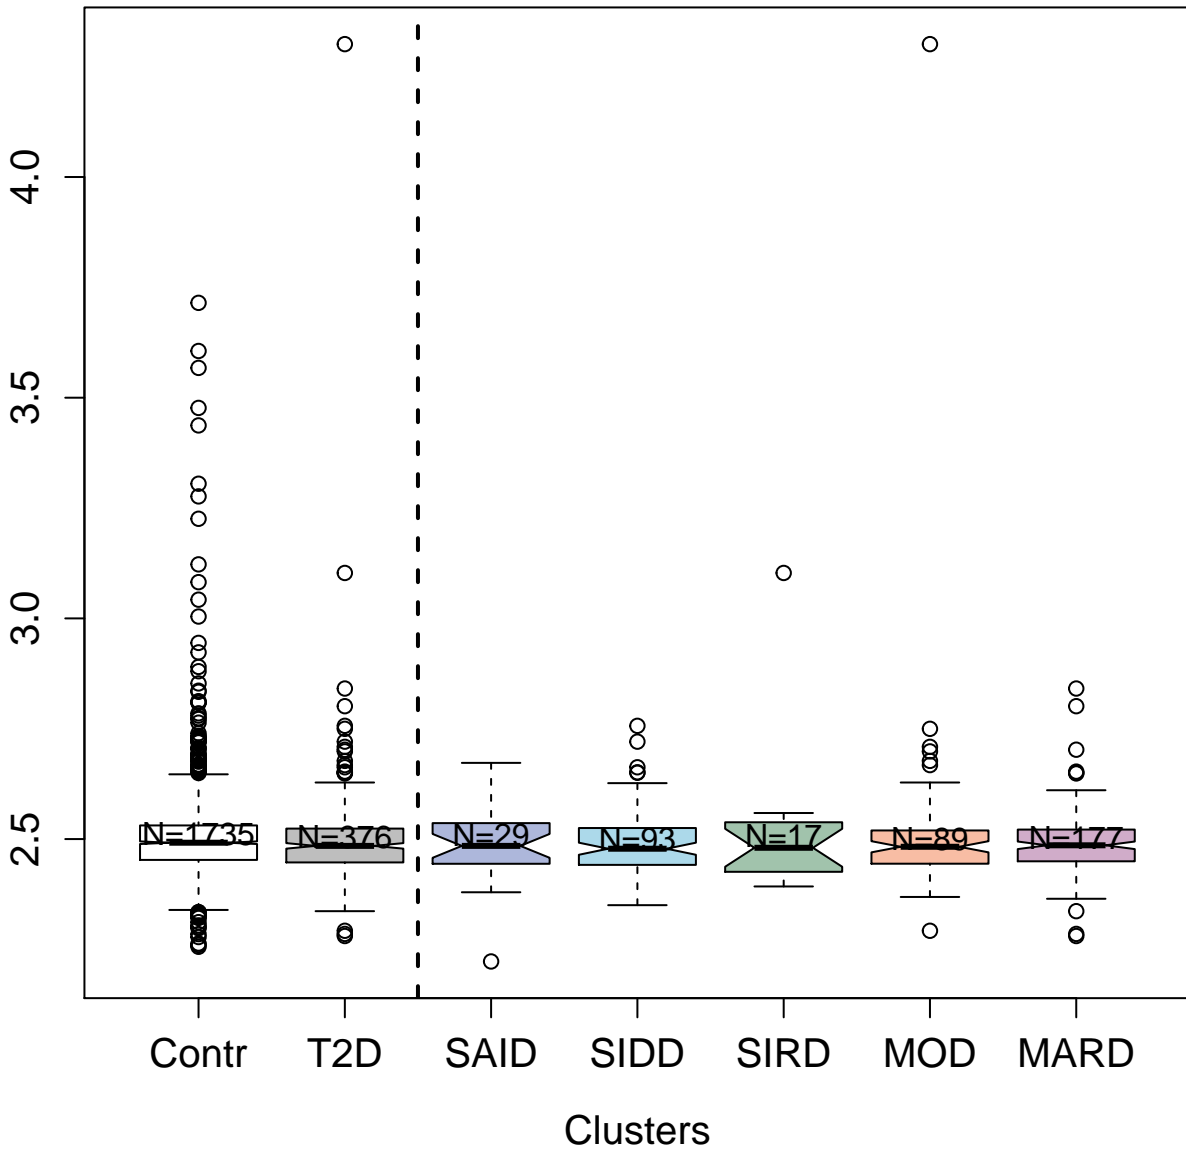



7624-19\_3 : Ankyrin-2

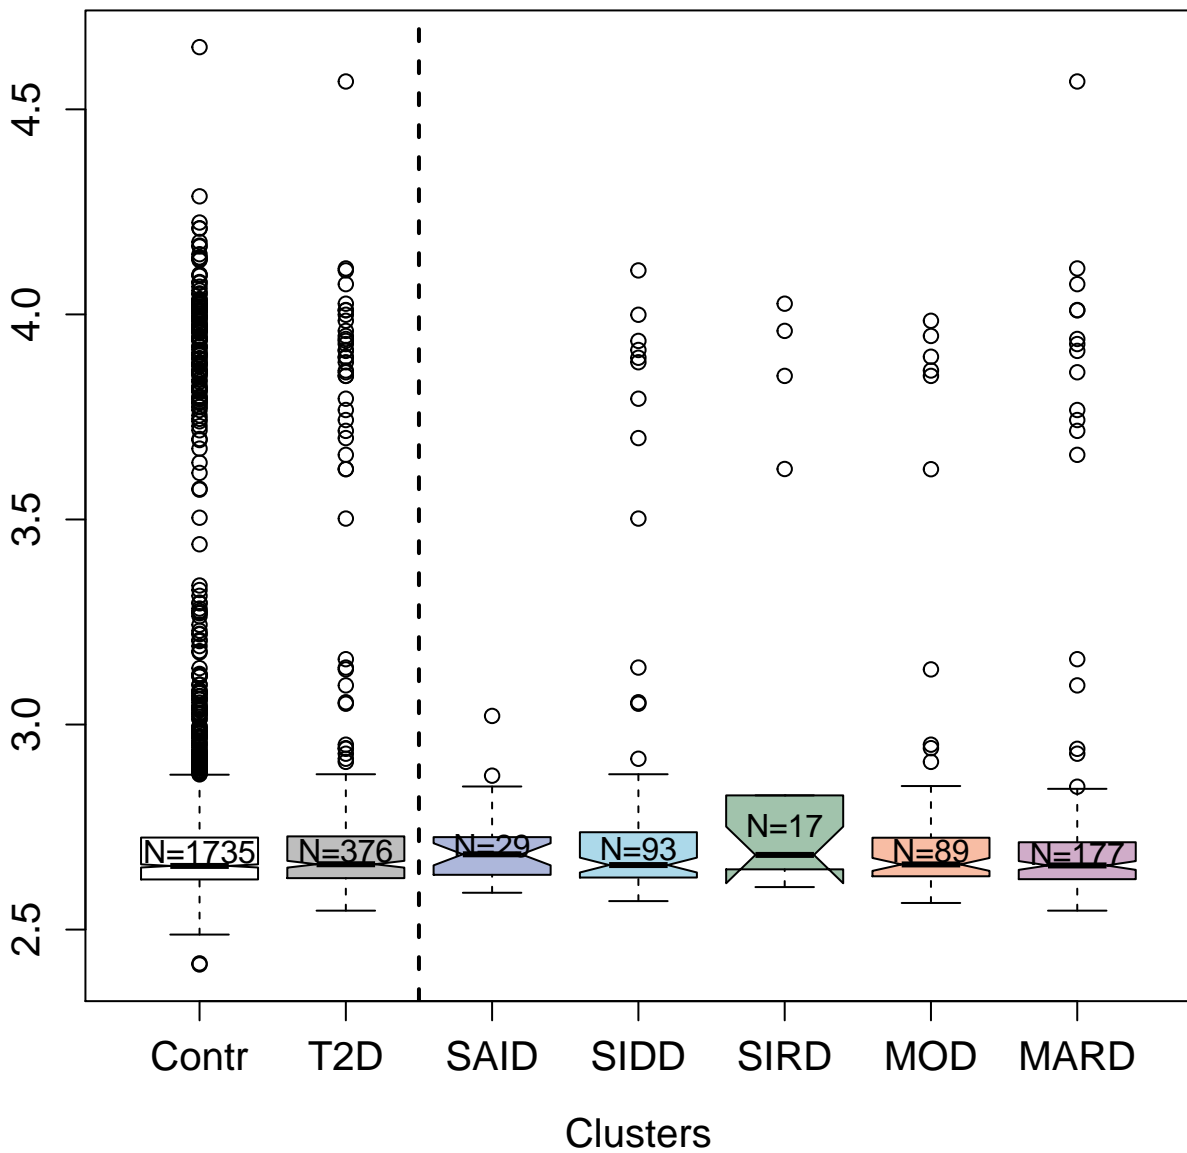

3795-6\_2 : Disintegrin and metalloproteinase domain-containing protein 9

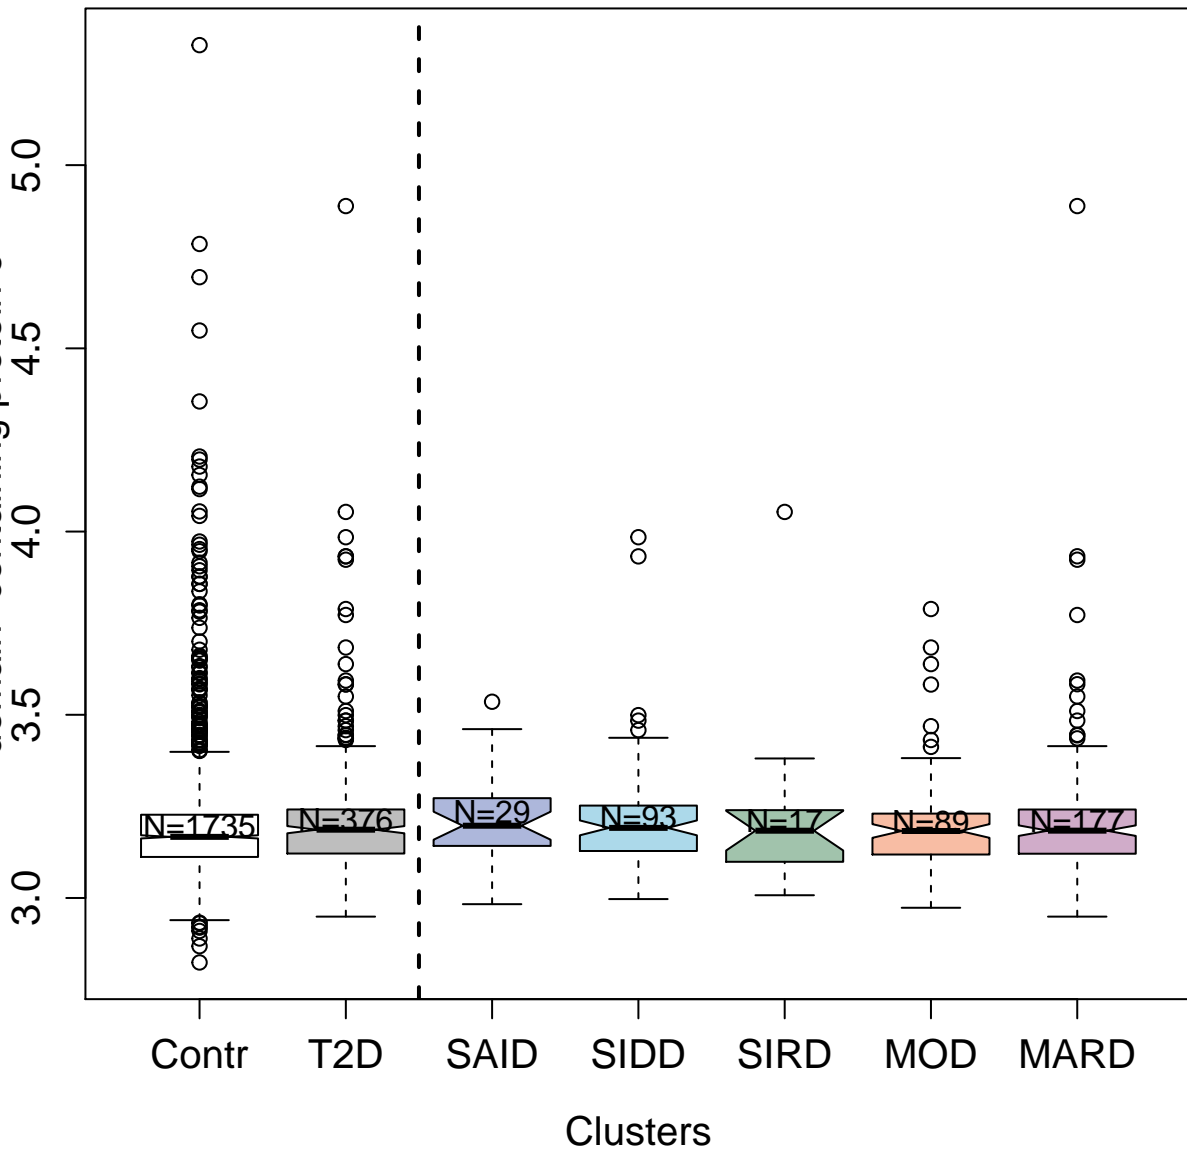

10344-334\_3 : Interleukin-10 receptor subunit

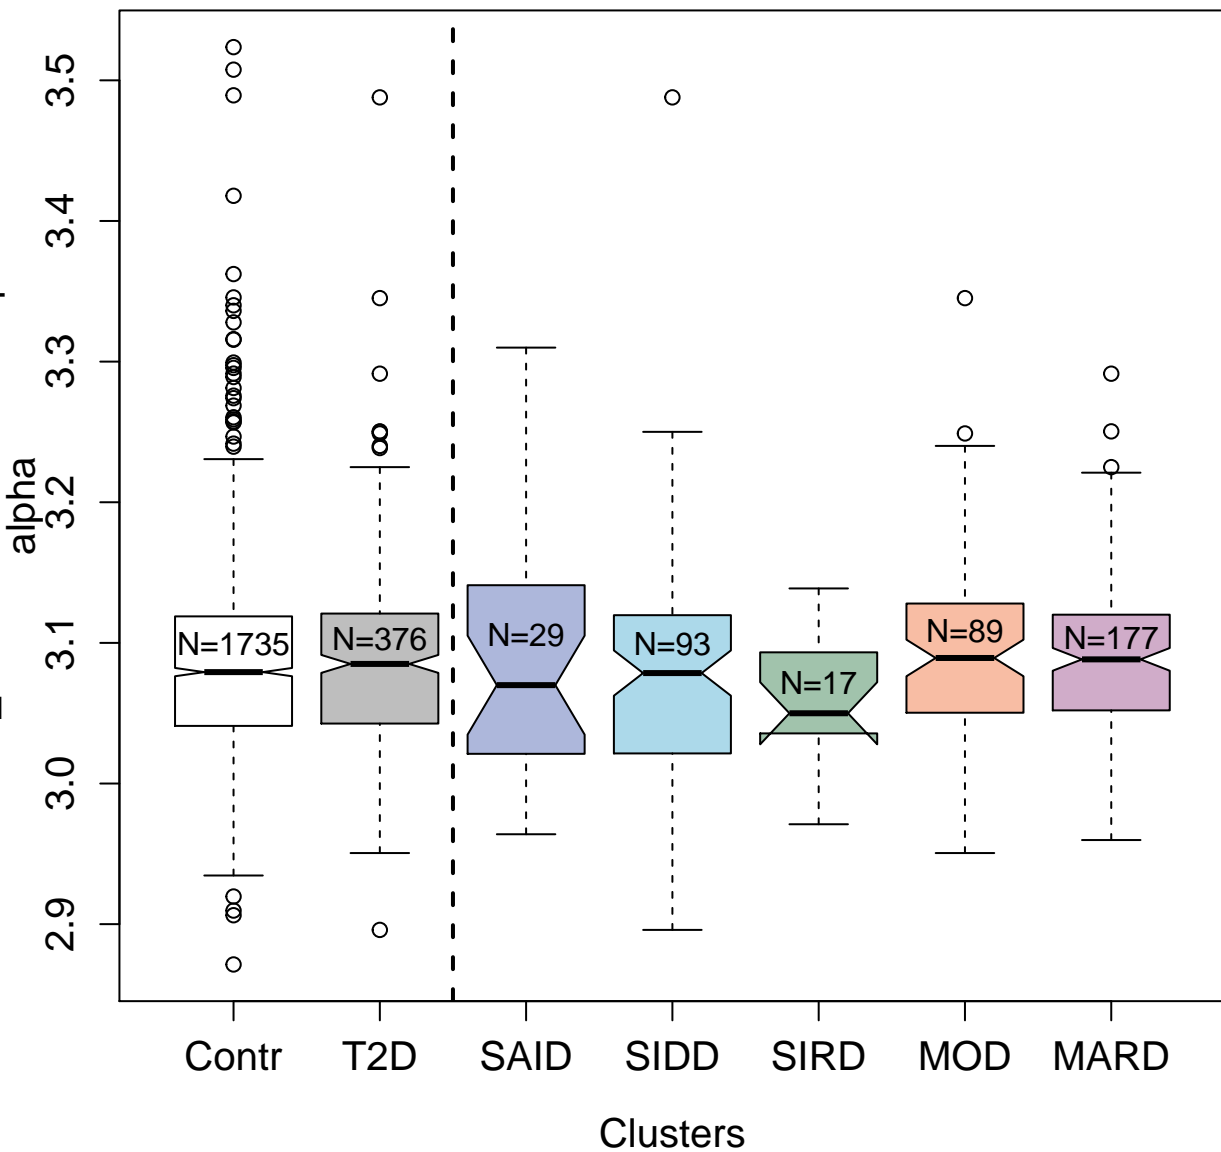

9215-117\_3 : Ubiquitin carboxyl-terminal  
hydrolase 25

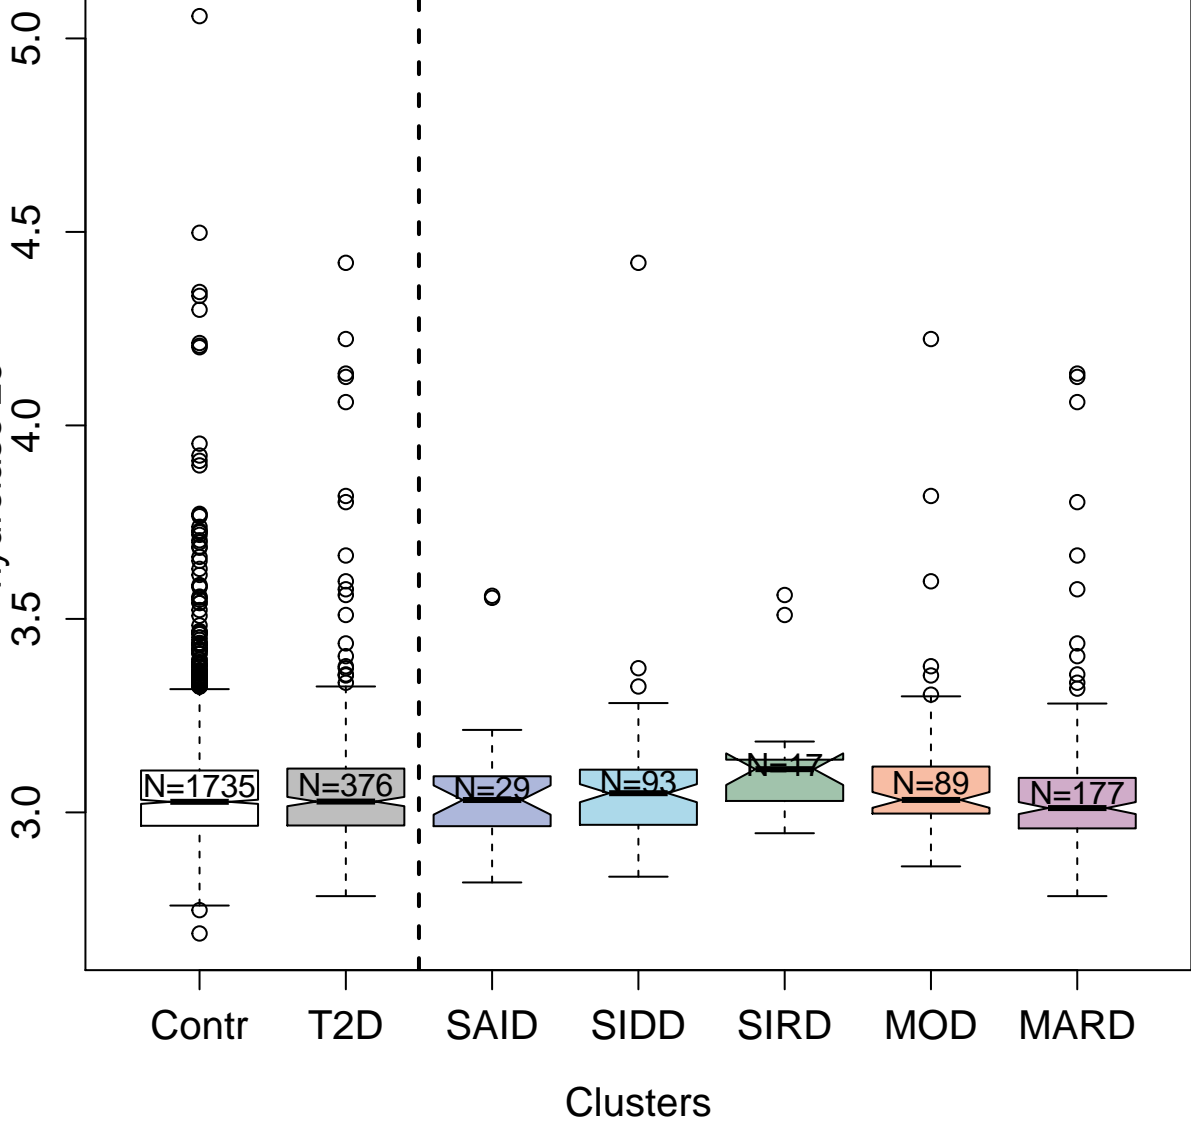

3346-72\_2 : Aurora kinase B

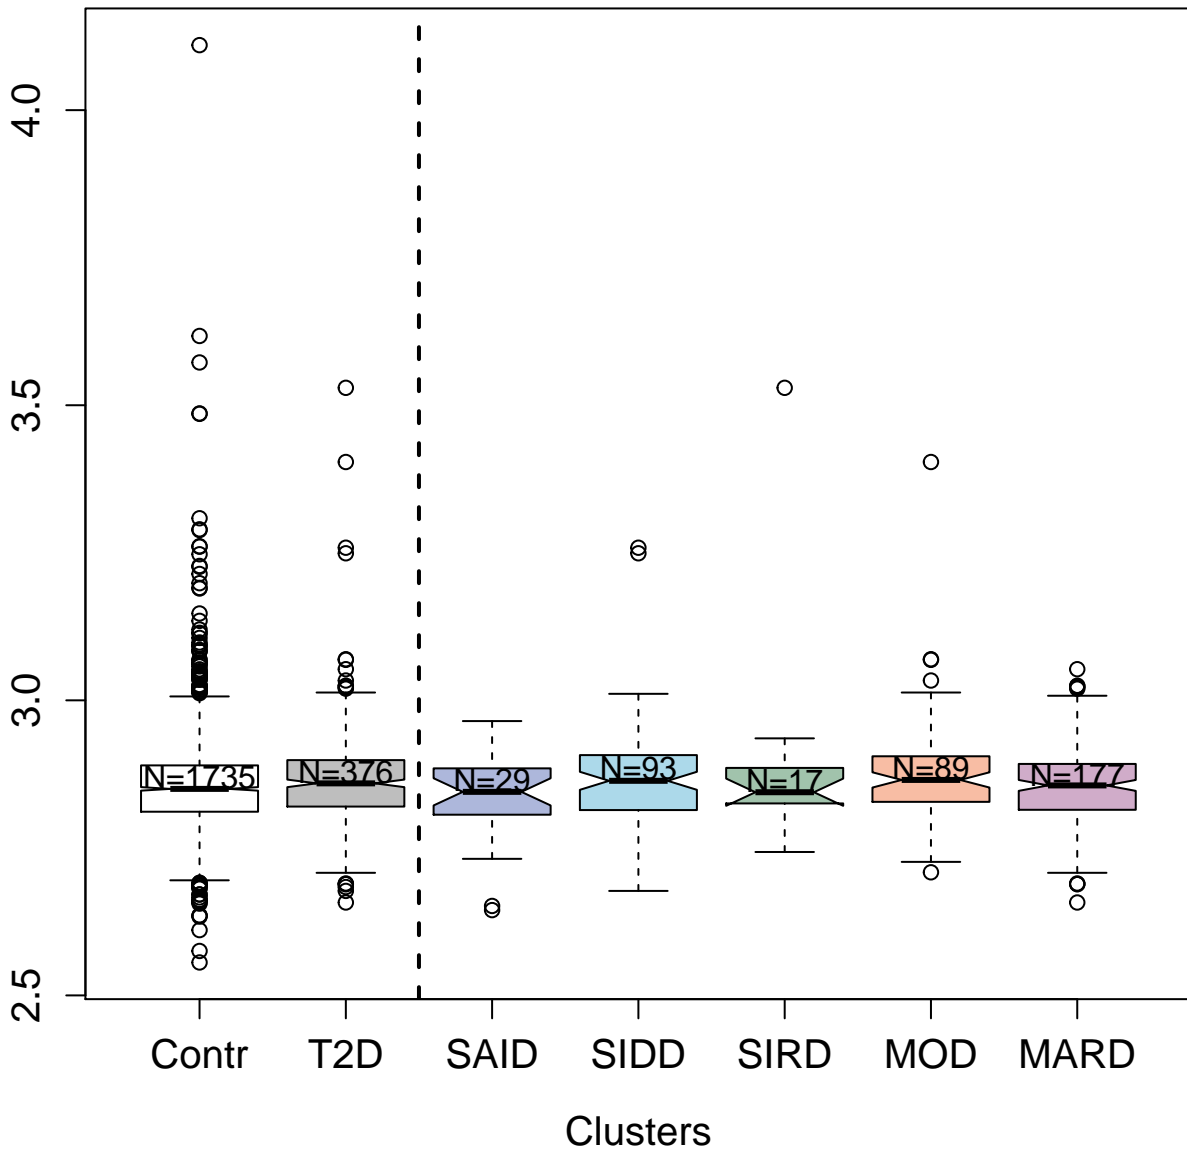

4491-4\_2 : Interleukin-5 receptor subunit alpha

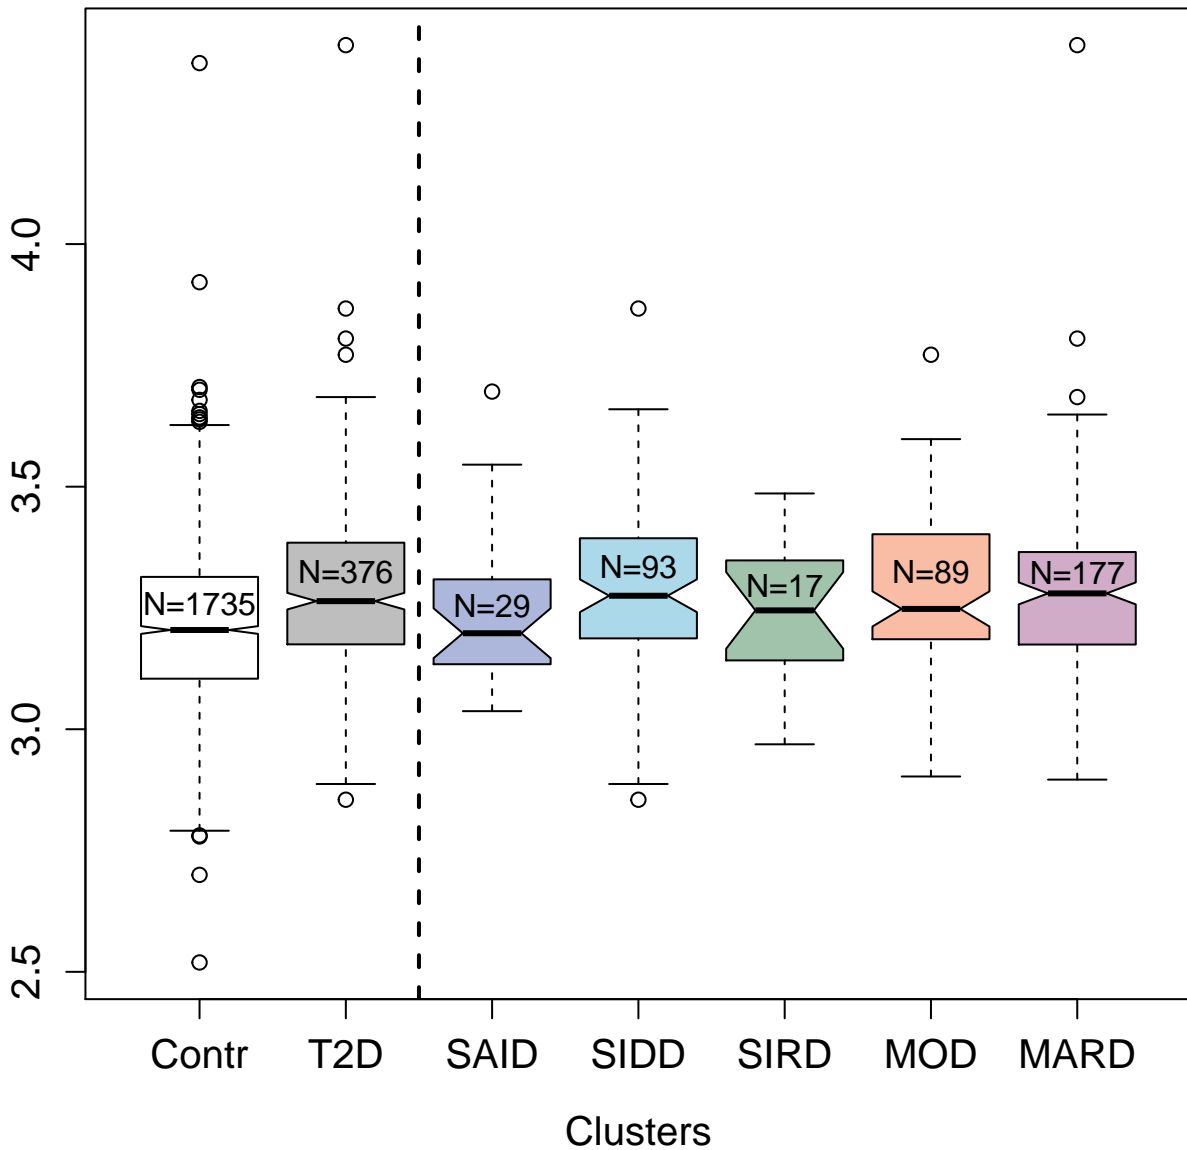

5084-154\_3 : Interleukin-17 receptor B

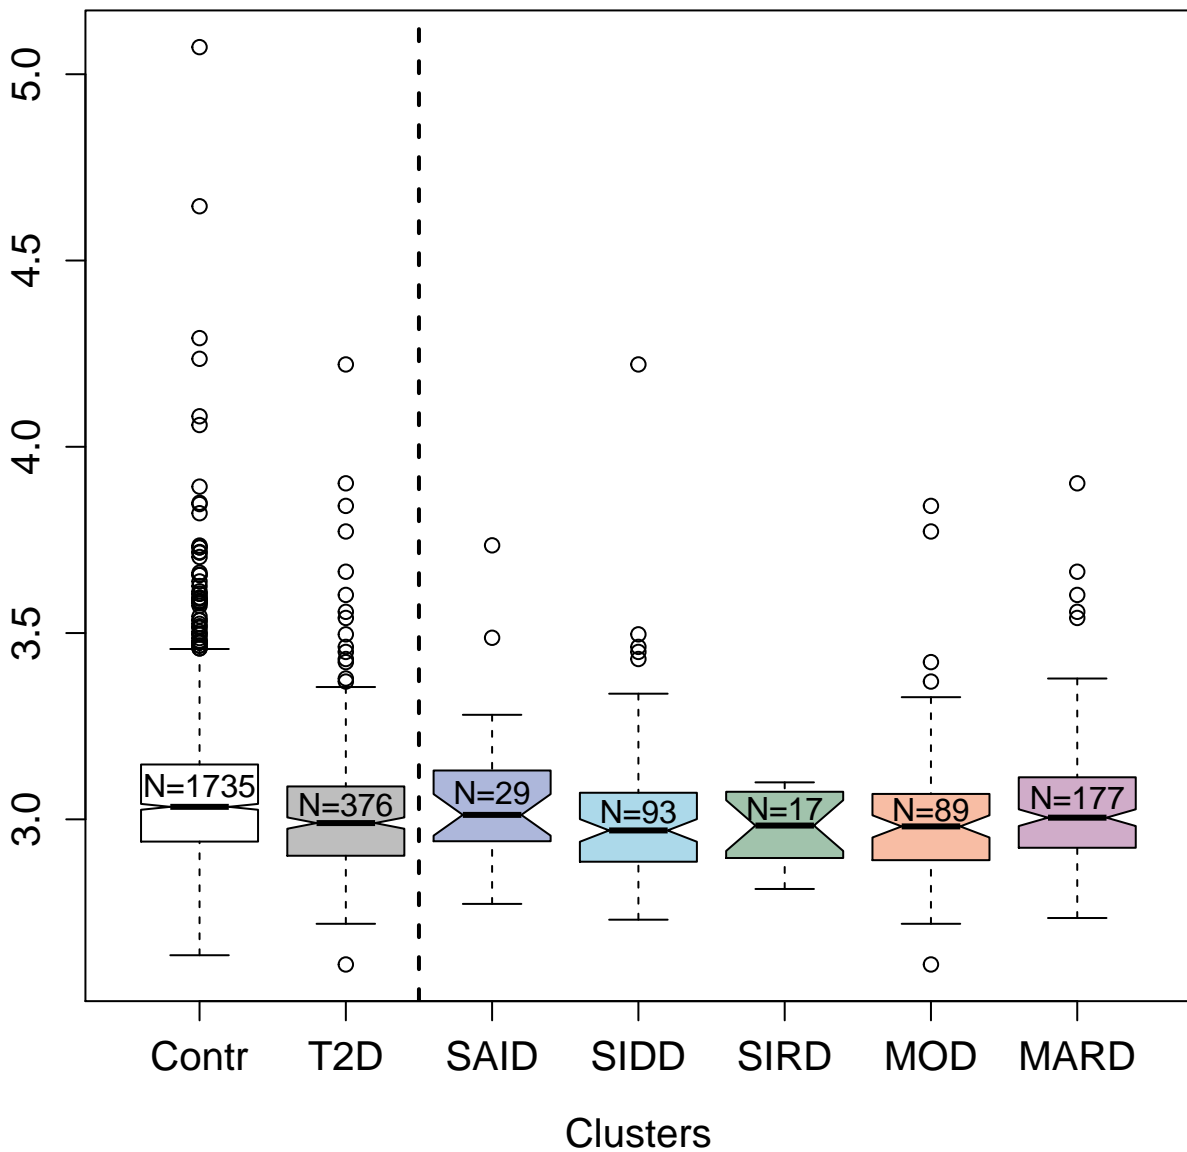

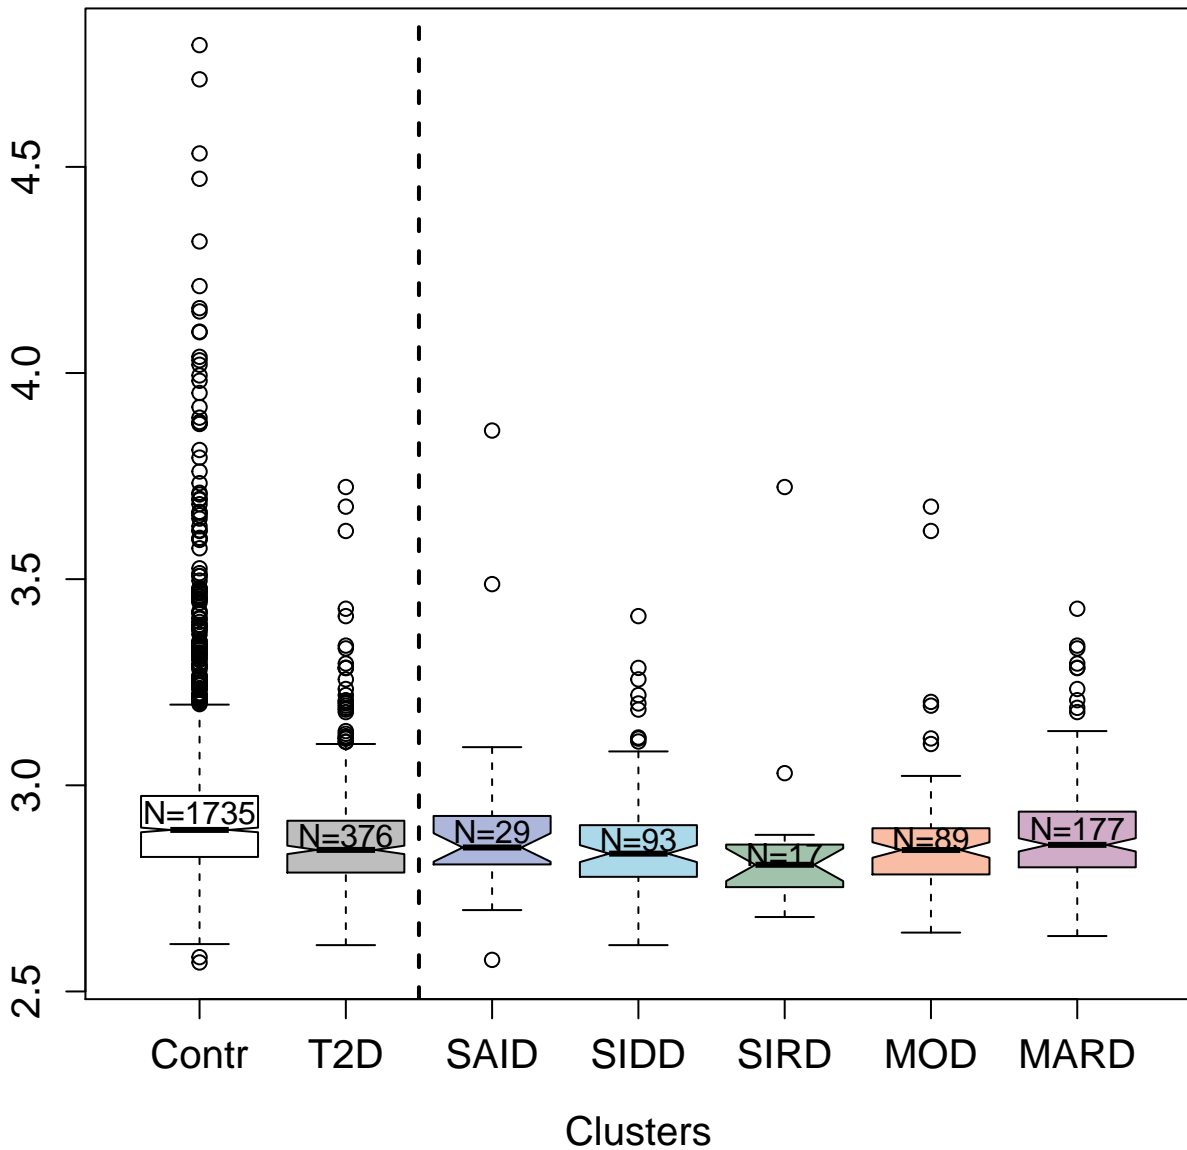





25667-5\_6 : Complement factor I

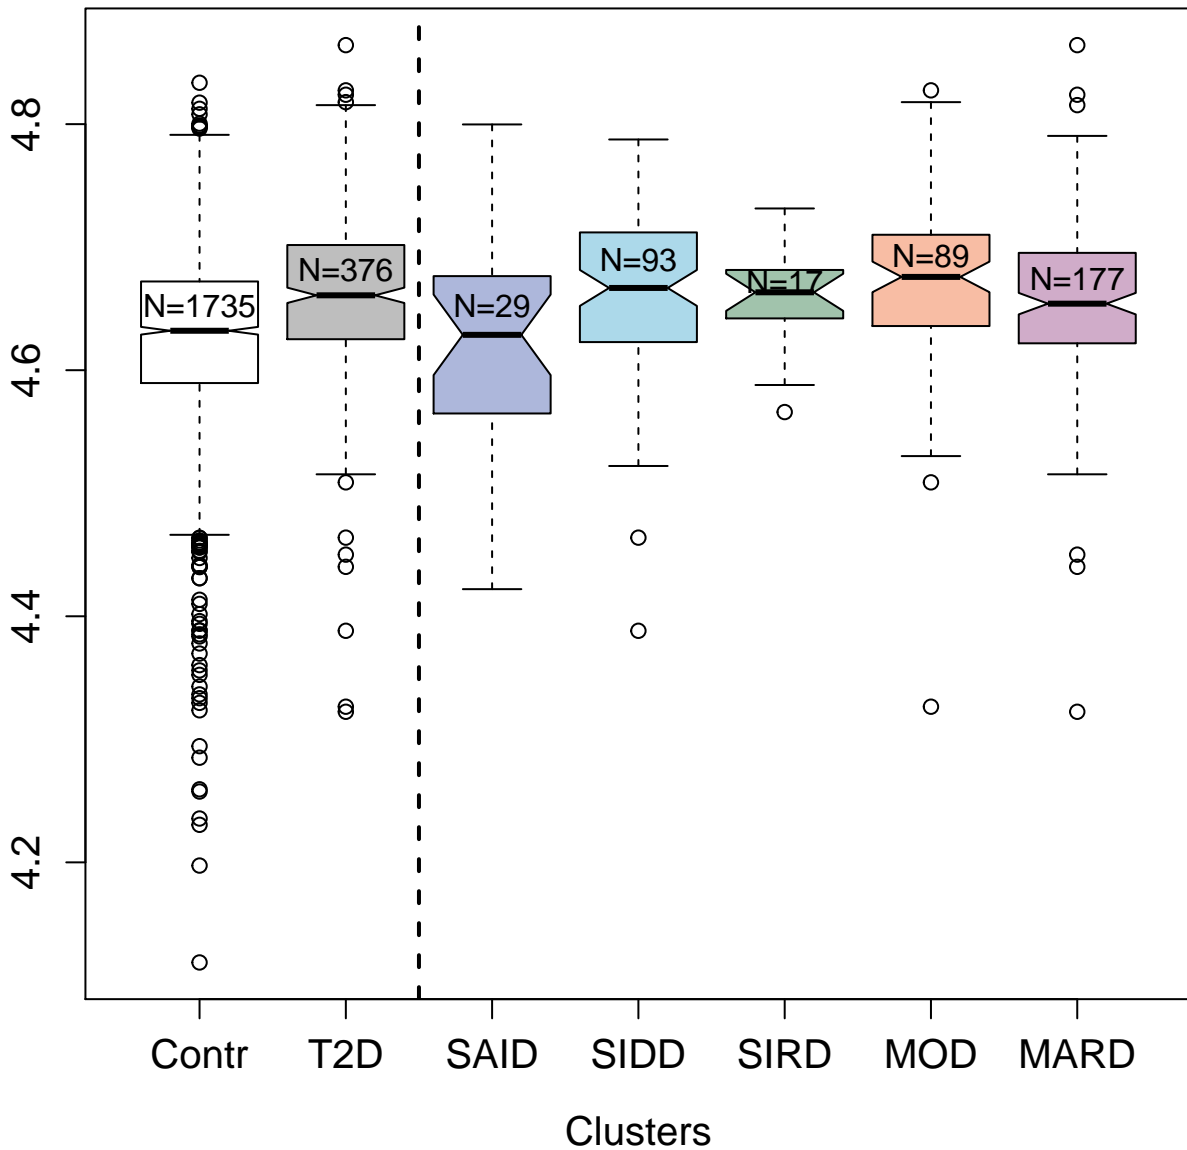

4889-82\_1 : Protein Wnt-7a

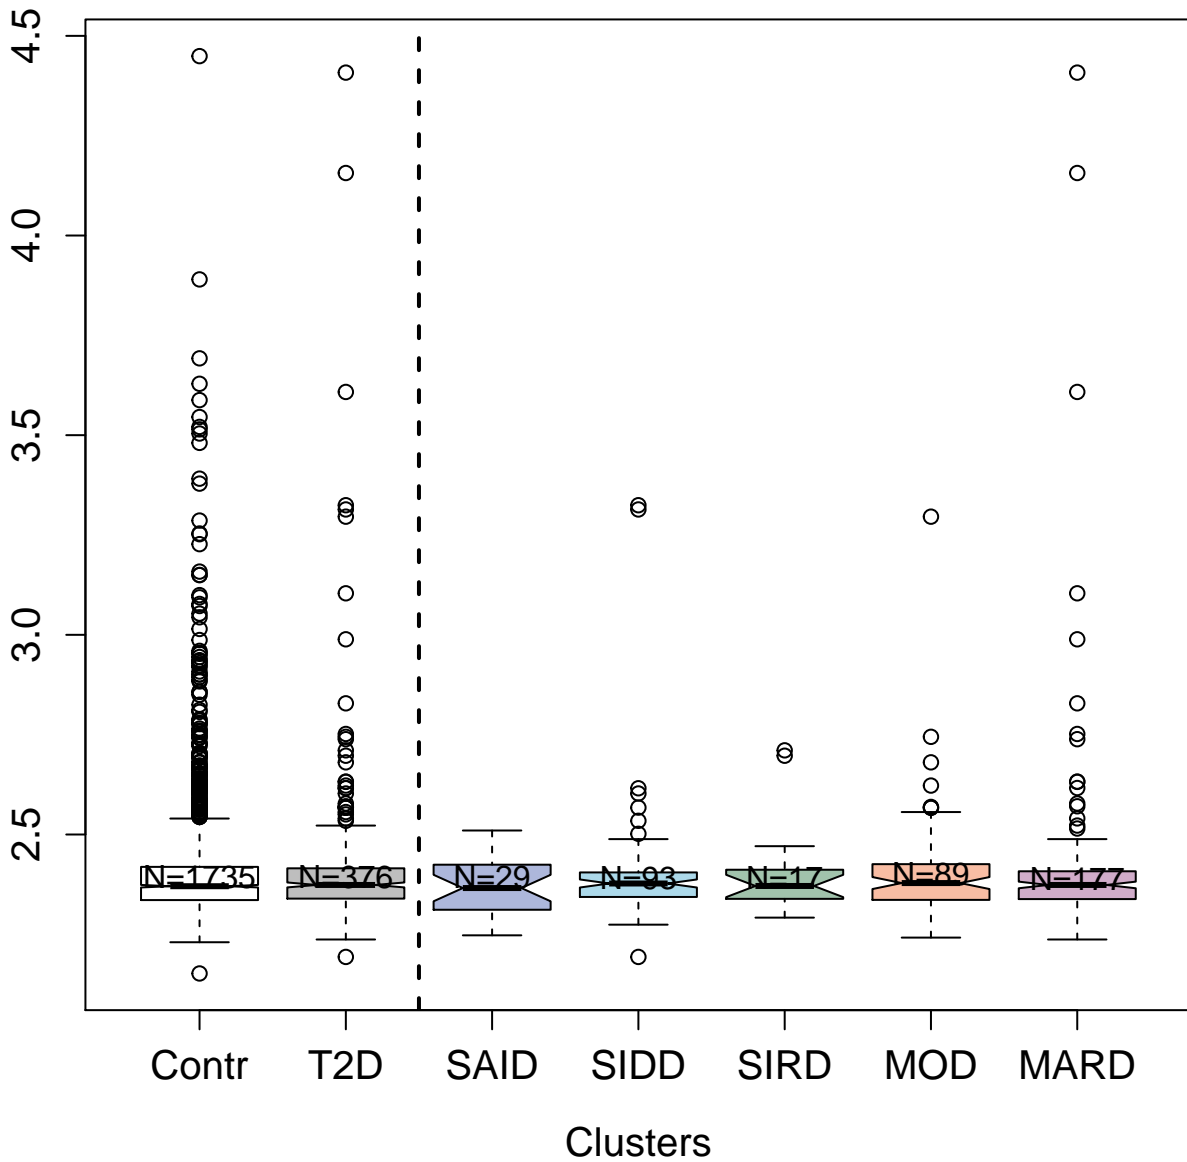

13111-79\_3 : B-cell lymphoma 6 protein

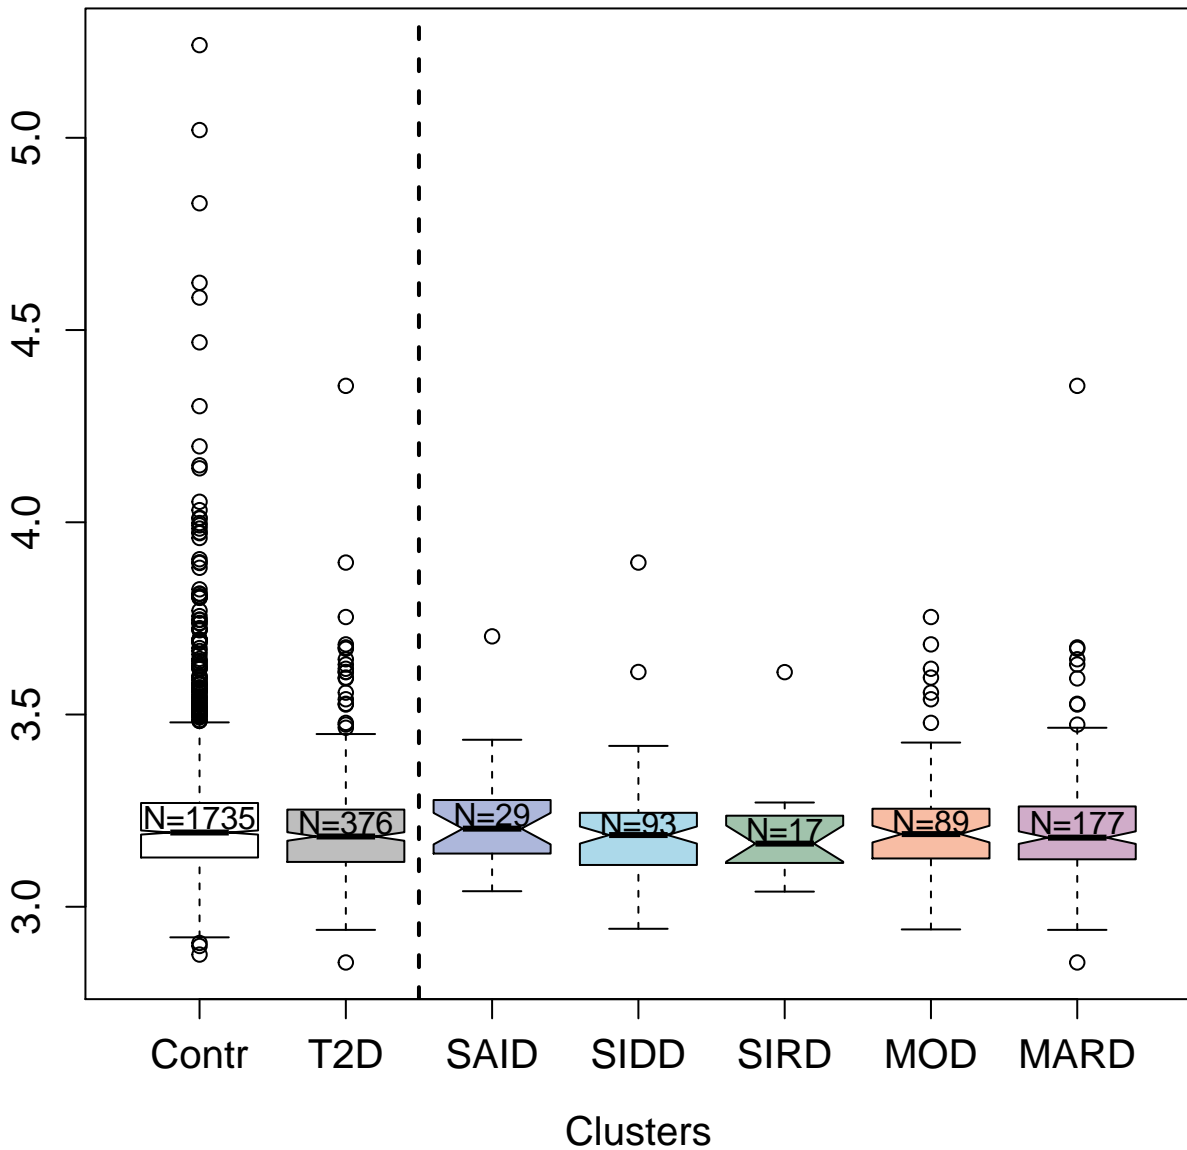



3293-2\_4 : CD5 antigen-like

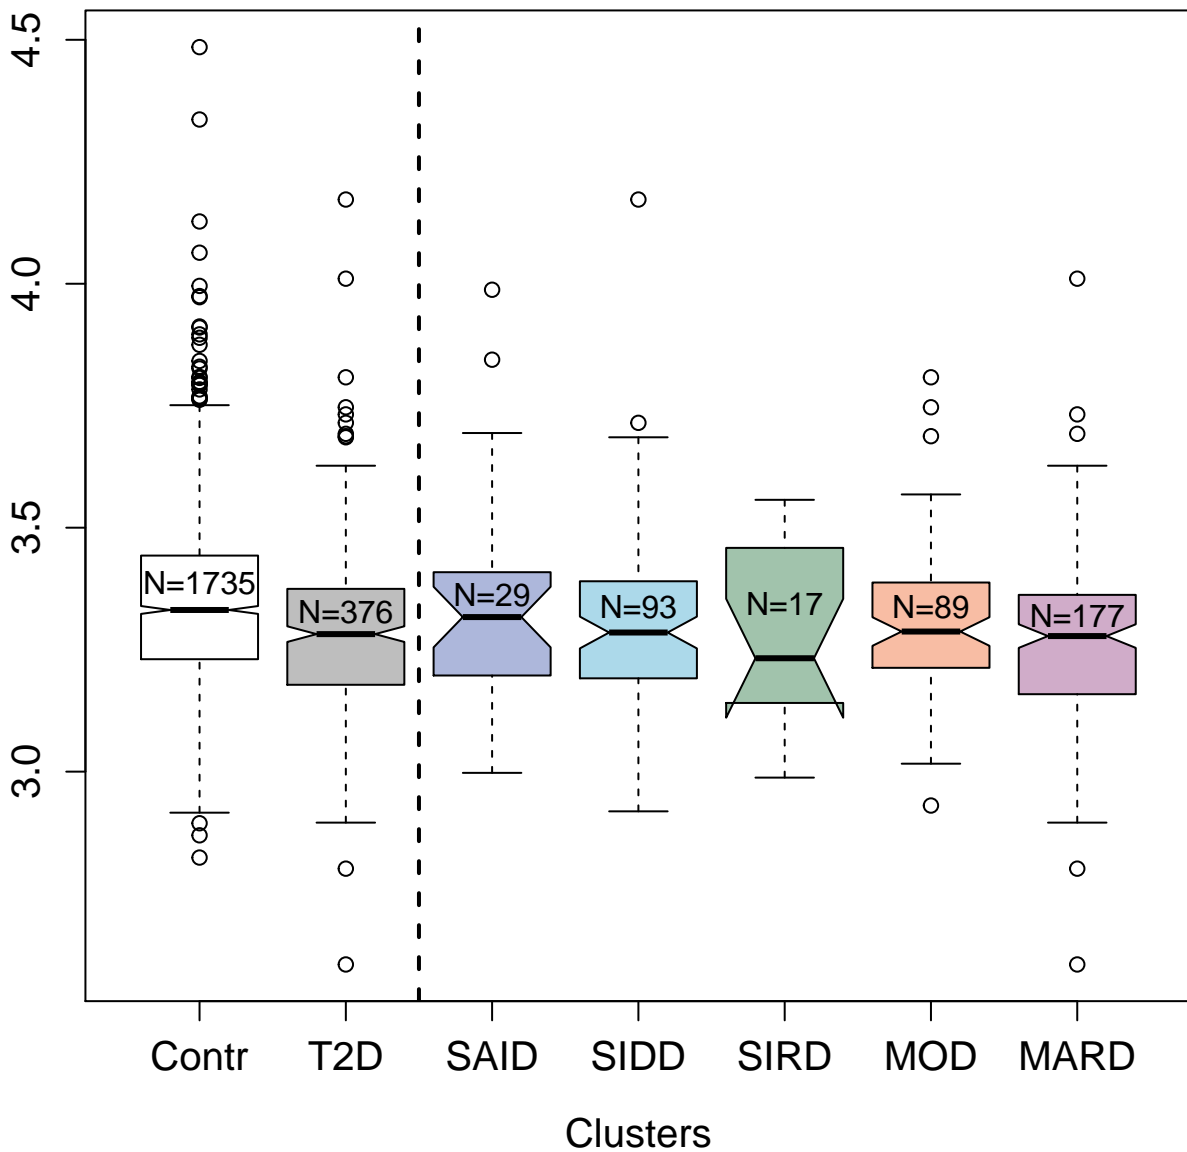

2754-50\_2 : Complement C3

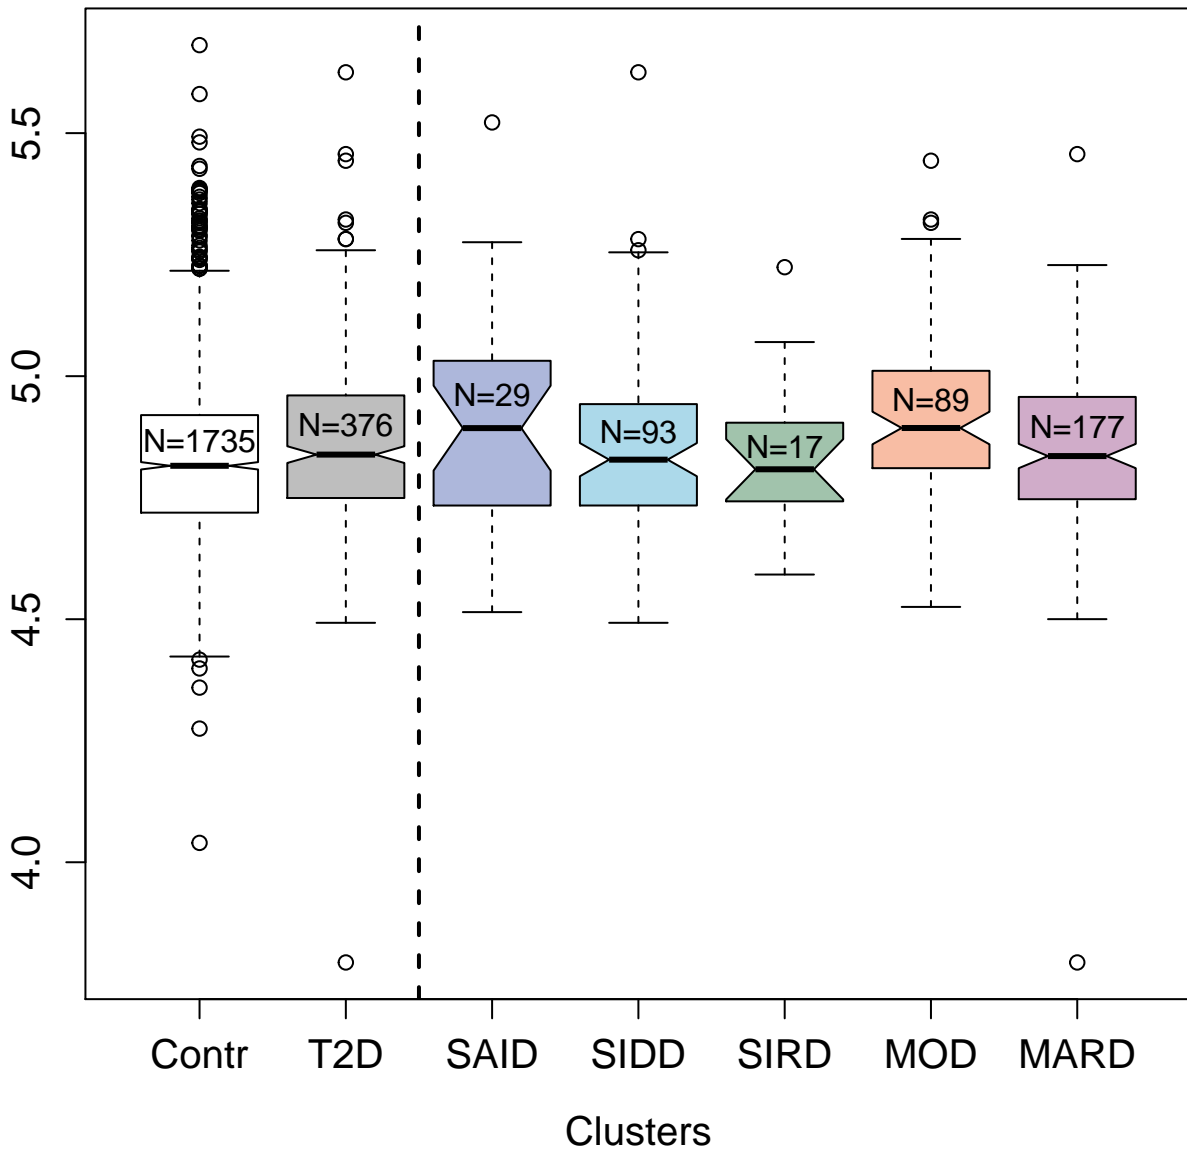

5915-58\_3 : Peroxisomal targeting signal 1

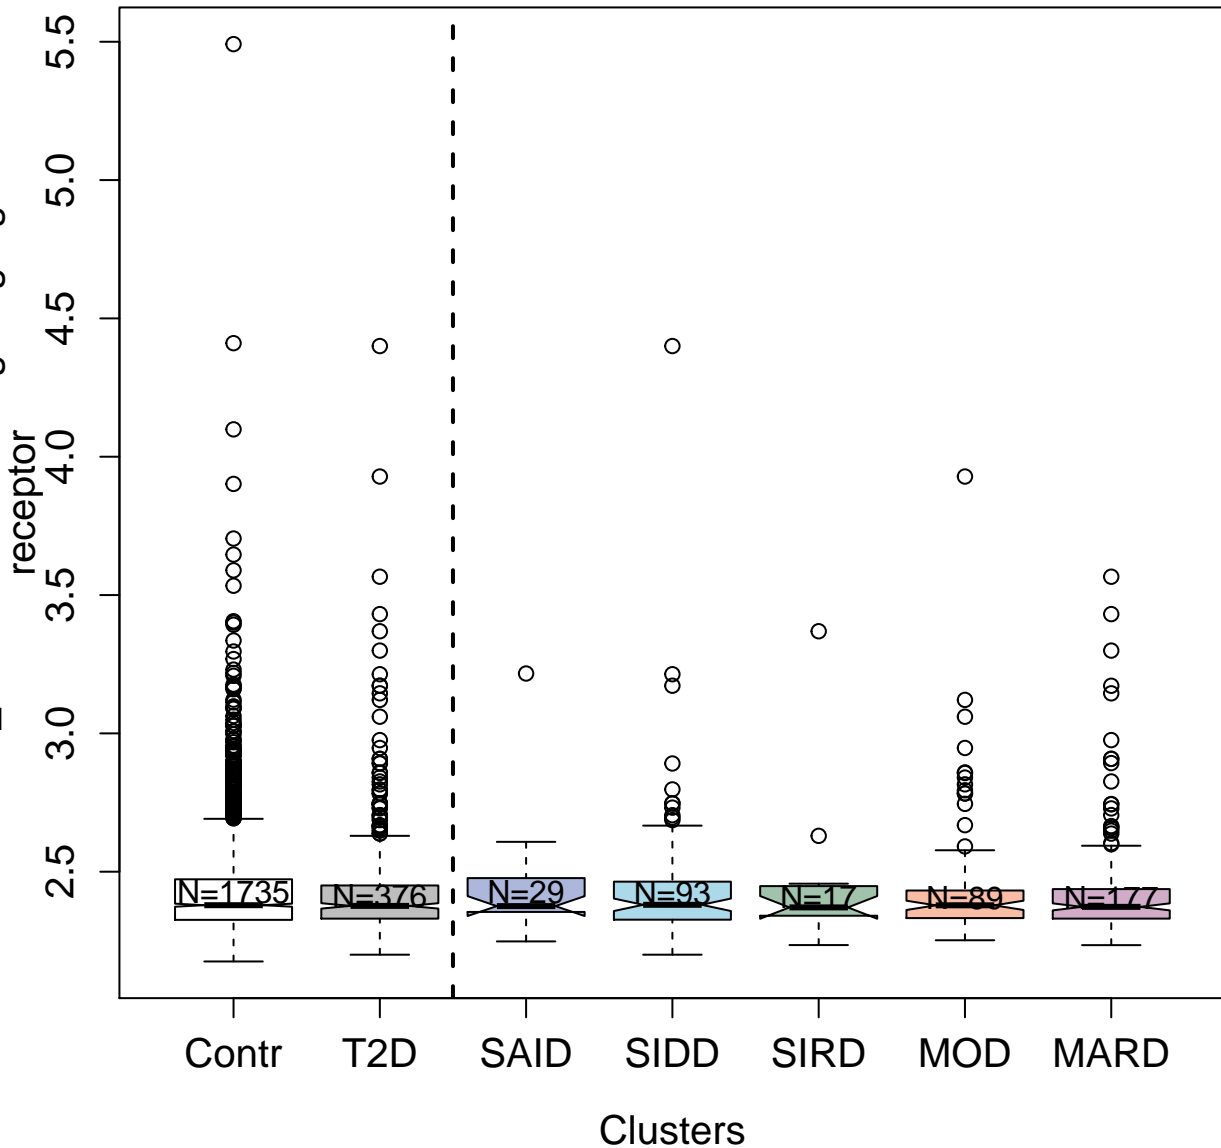



5096-51\_3 : Killer cell immunoglobulin-like  
receptor 3DL2

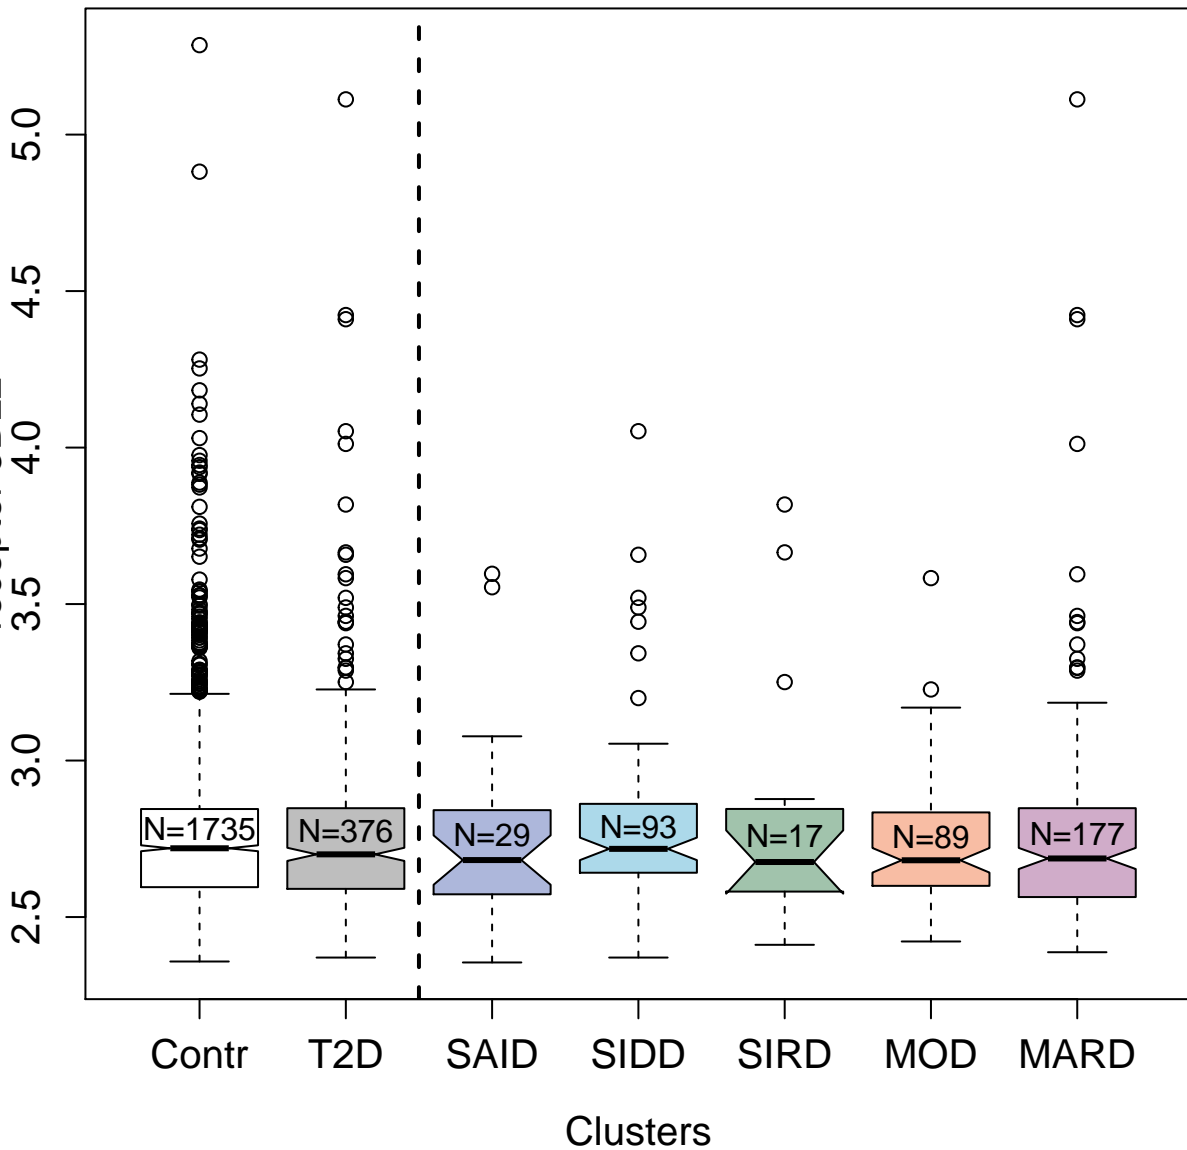

5230-99\_3 : 3-hydroxy-3-methylglutaryl-coenzyme A

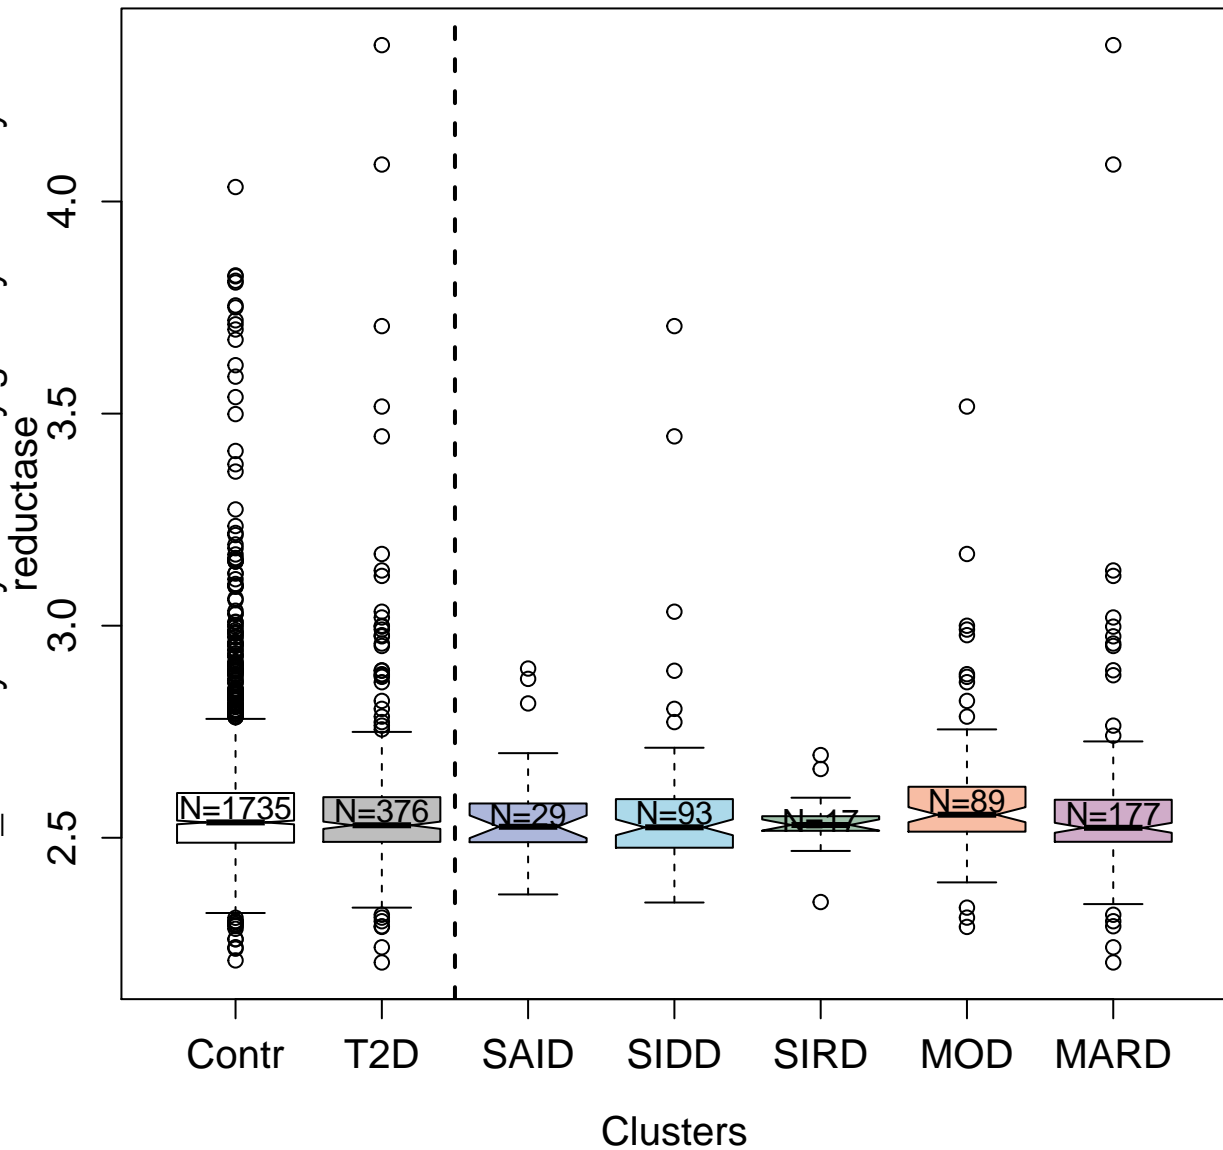

2780-35\_2 : Lactotransferrin

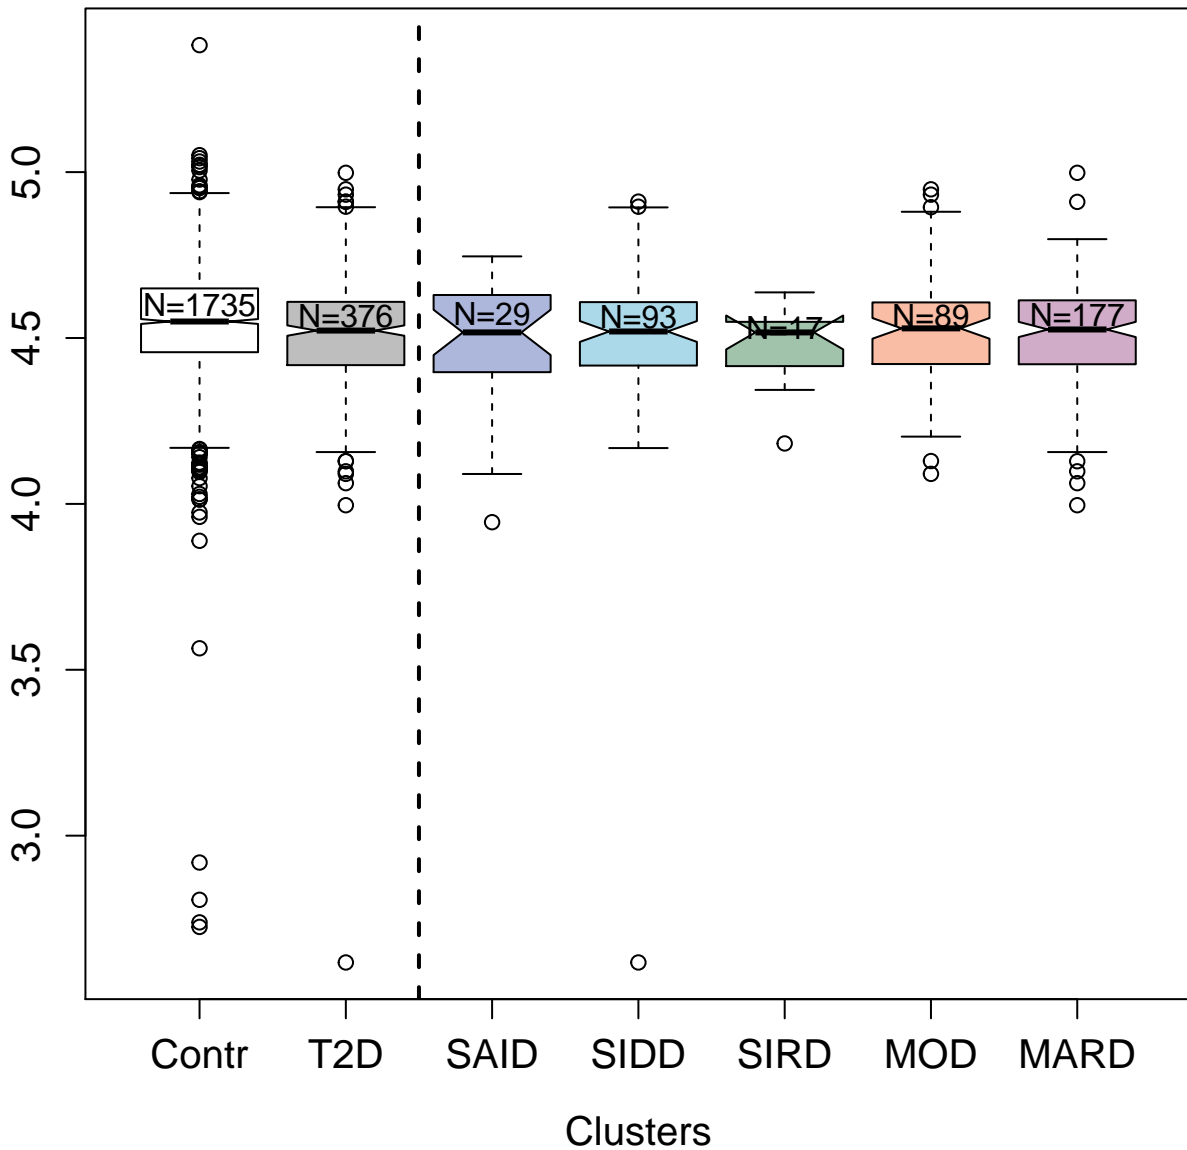

4423-77\_2 : Bcl-2-like protein 1

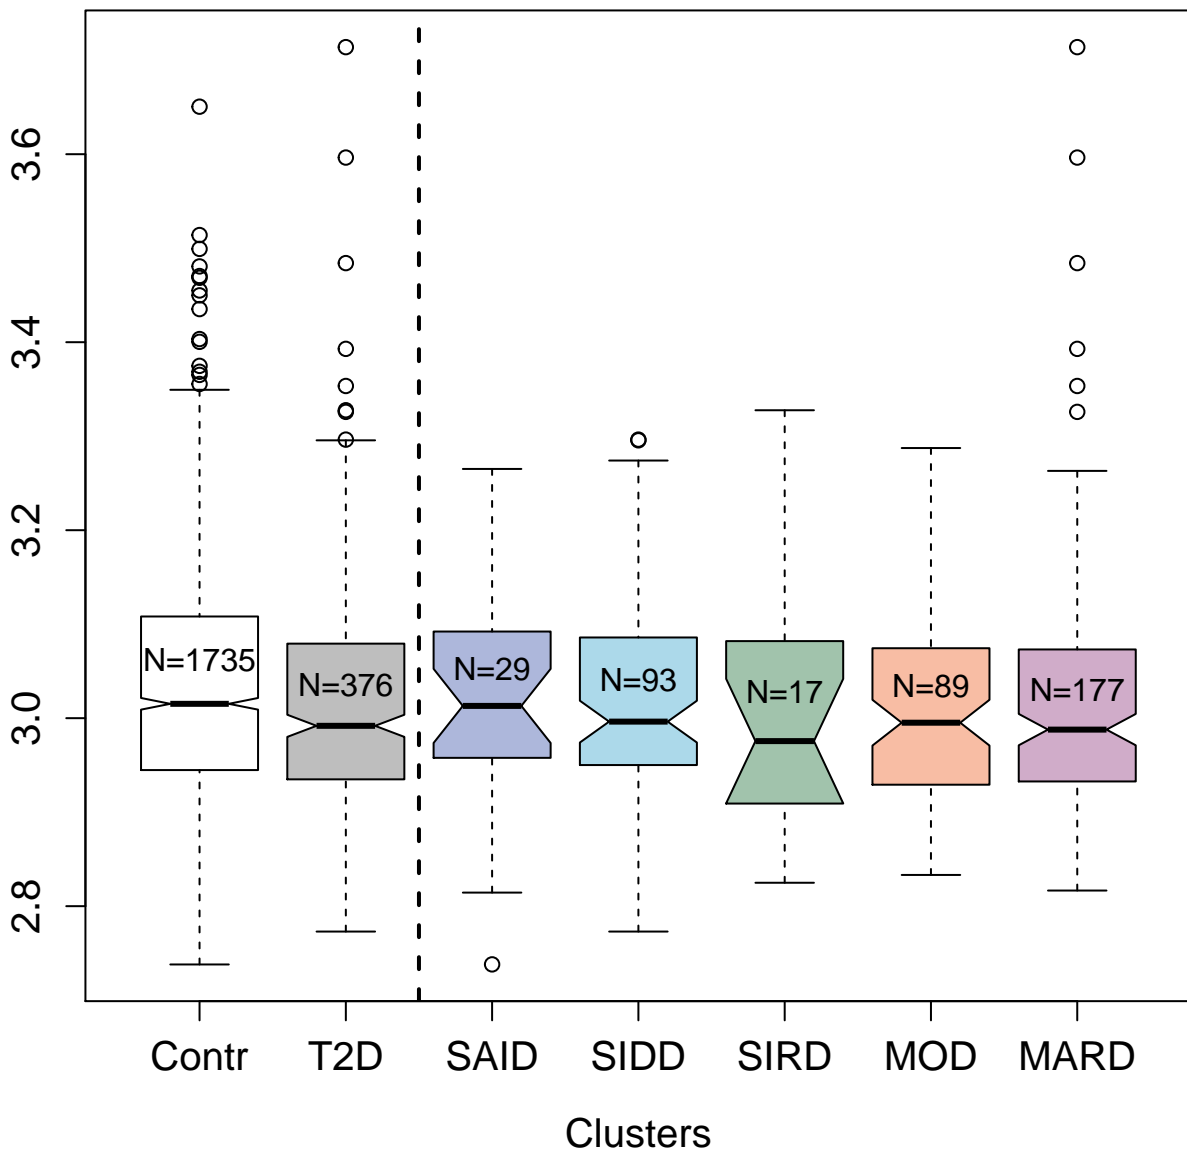

4886-3\_1 : C-C motif chemokine 7

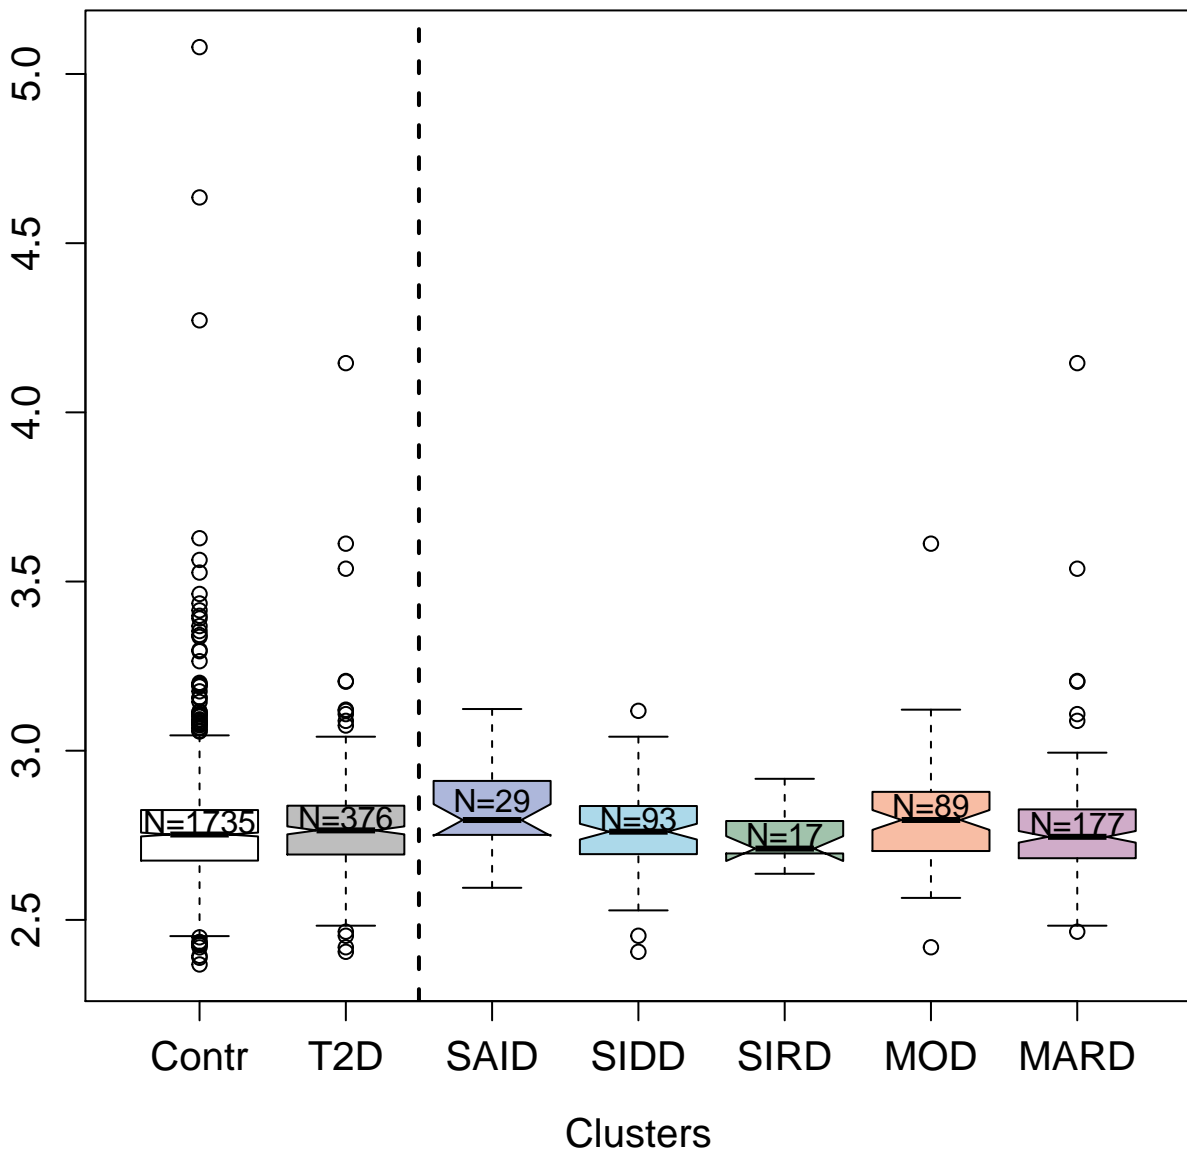

5347-59\_3 : G2/mitotic-specific cyclin-B1

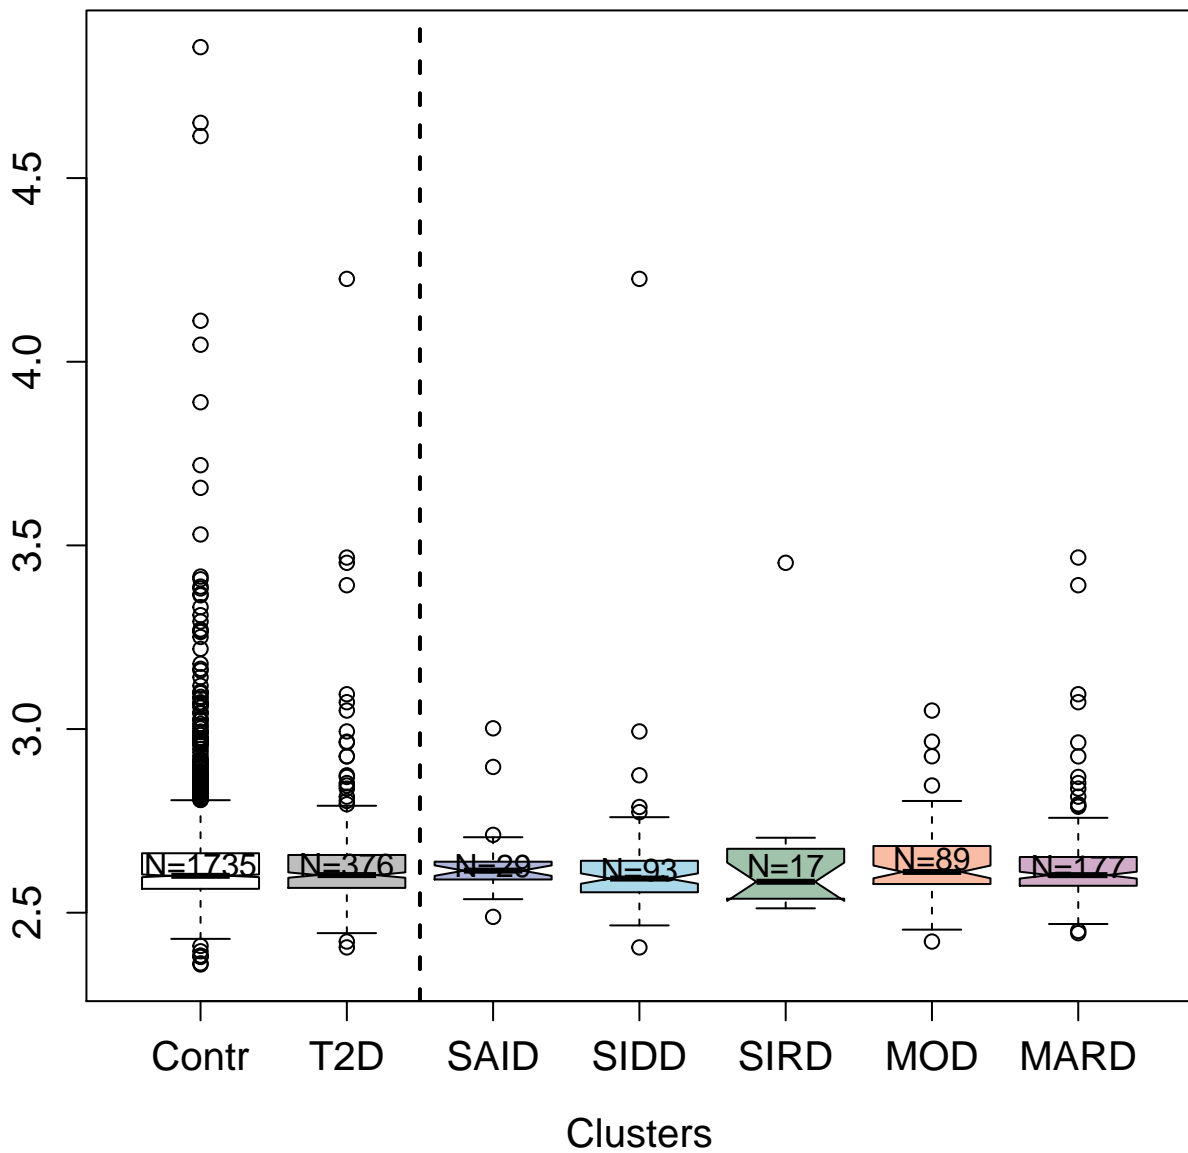

2640-3\_2 : Macrophage-stimulating protein  
receptor

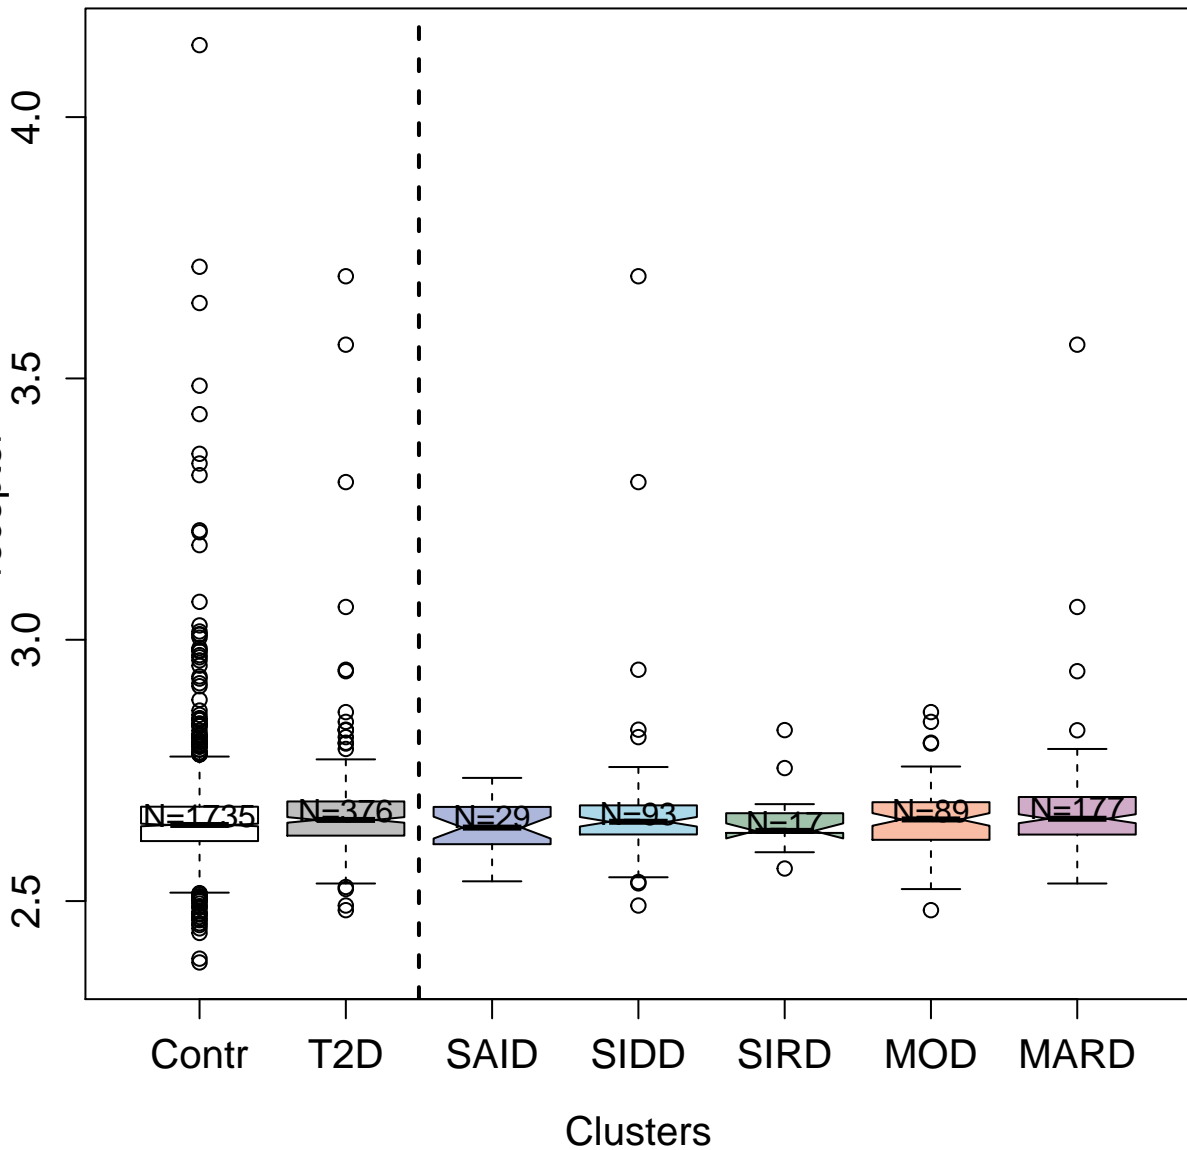

5357-60\_3 : Neurologin-4; X-linked

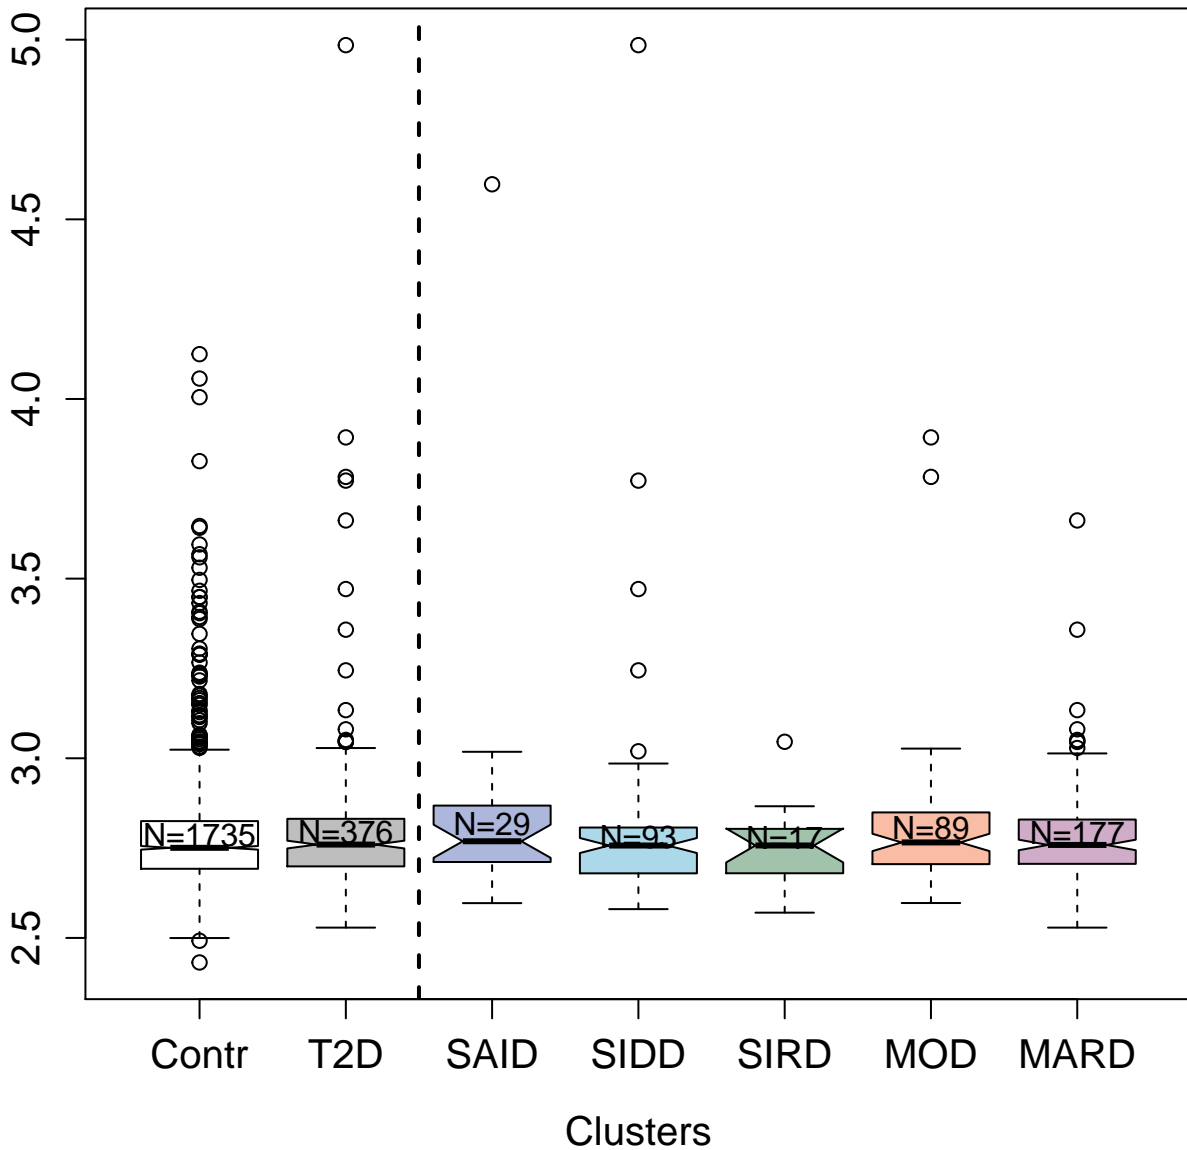



4693-72\_2 : 3-hydroxyisobutyrate dehydrogenase;  
mitochondrial

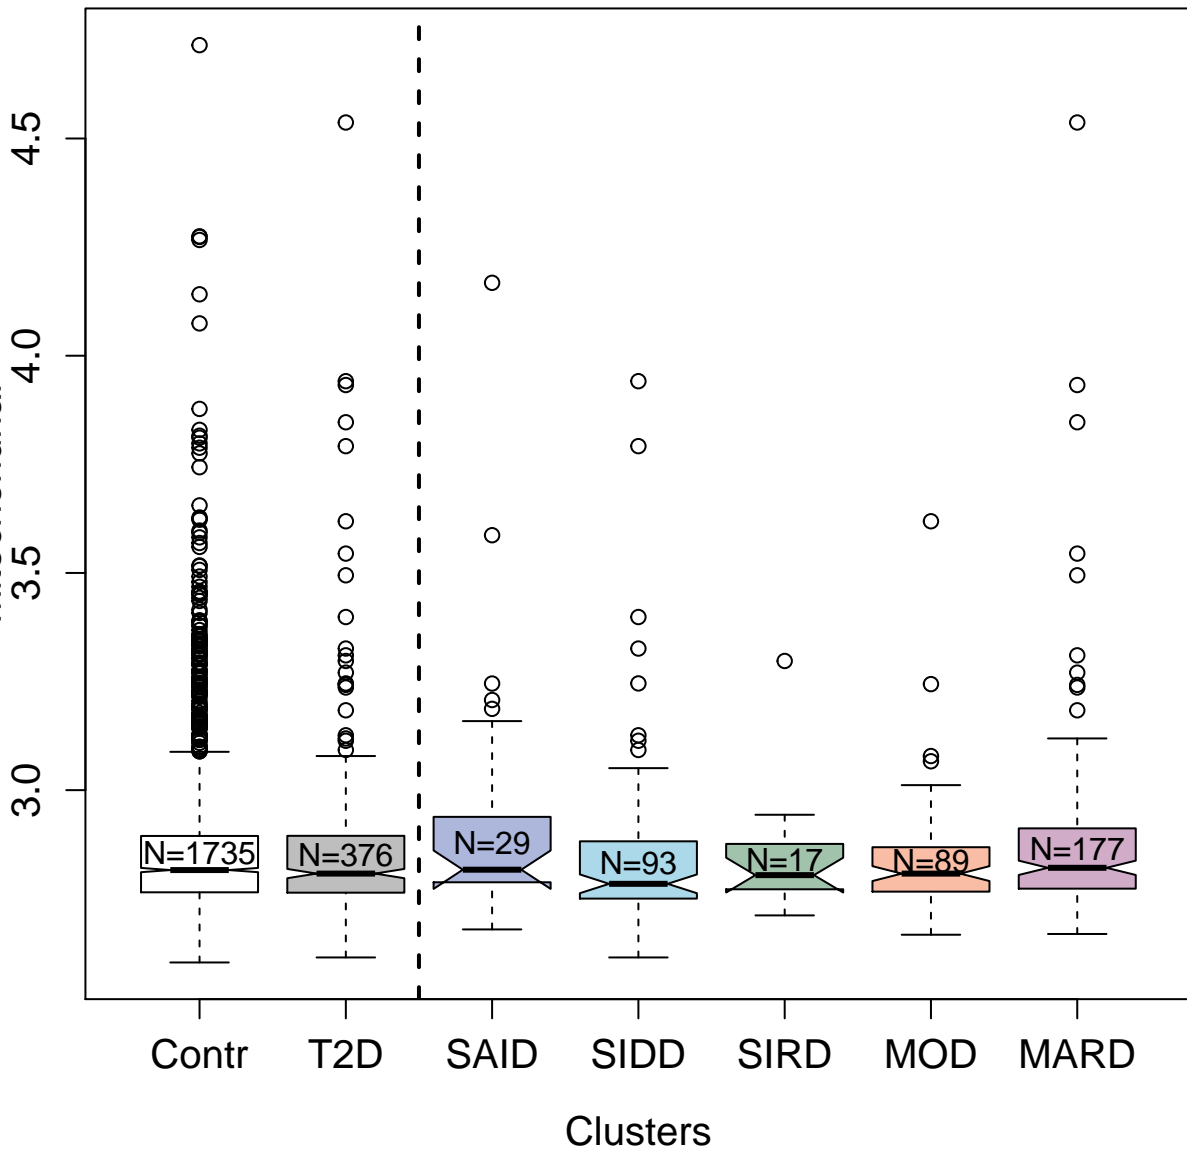



10337-83\_3 : CCAAT/enhancer-binding protein beta

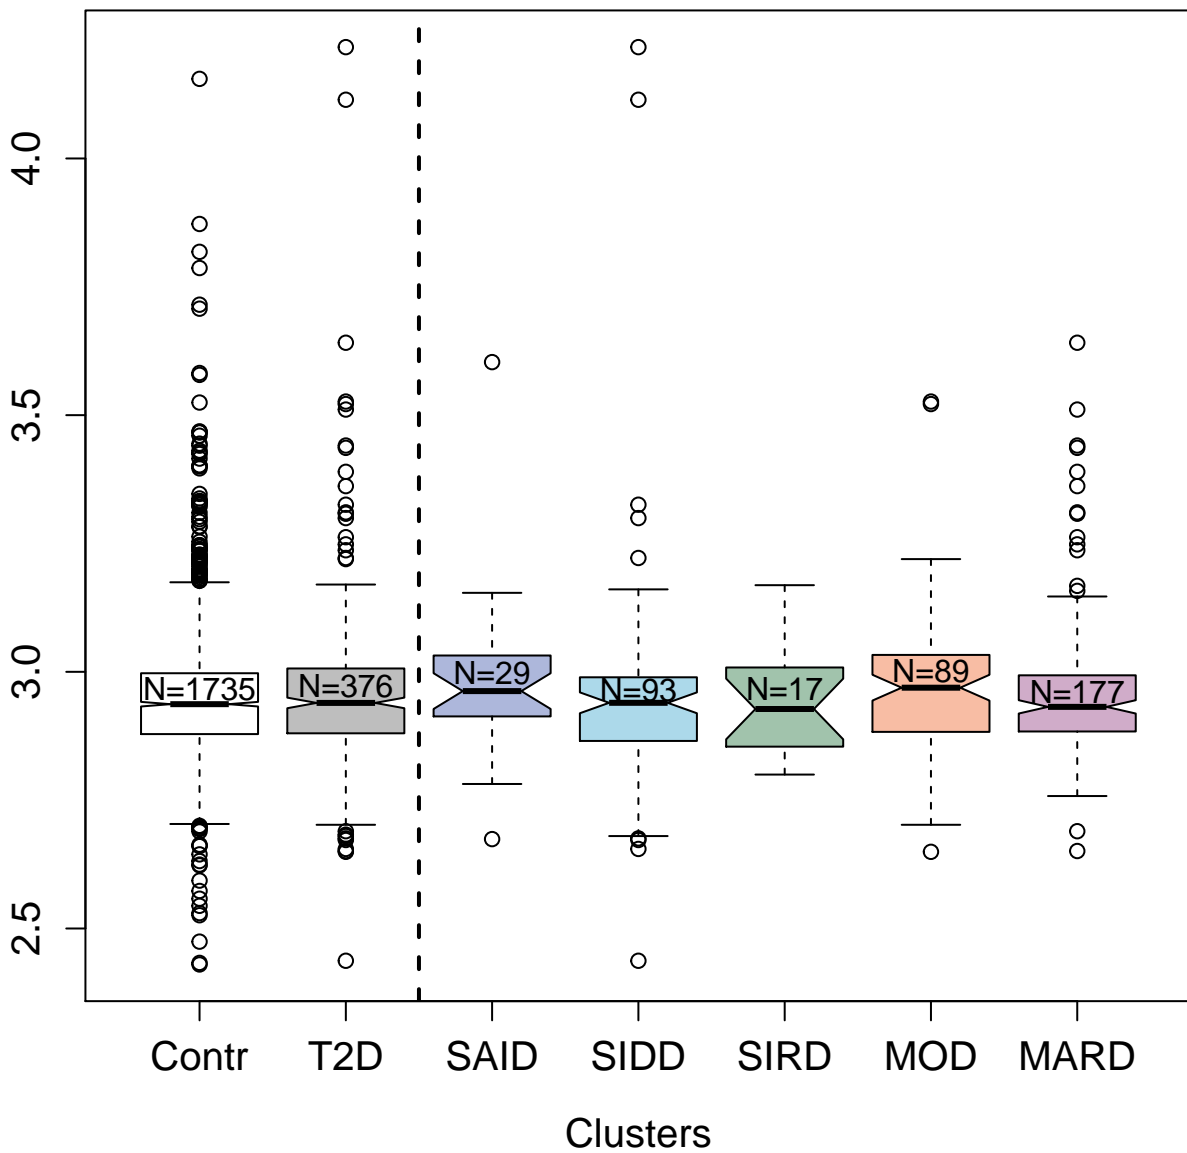

3081-70\_2 : NKG2D ligand 1

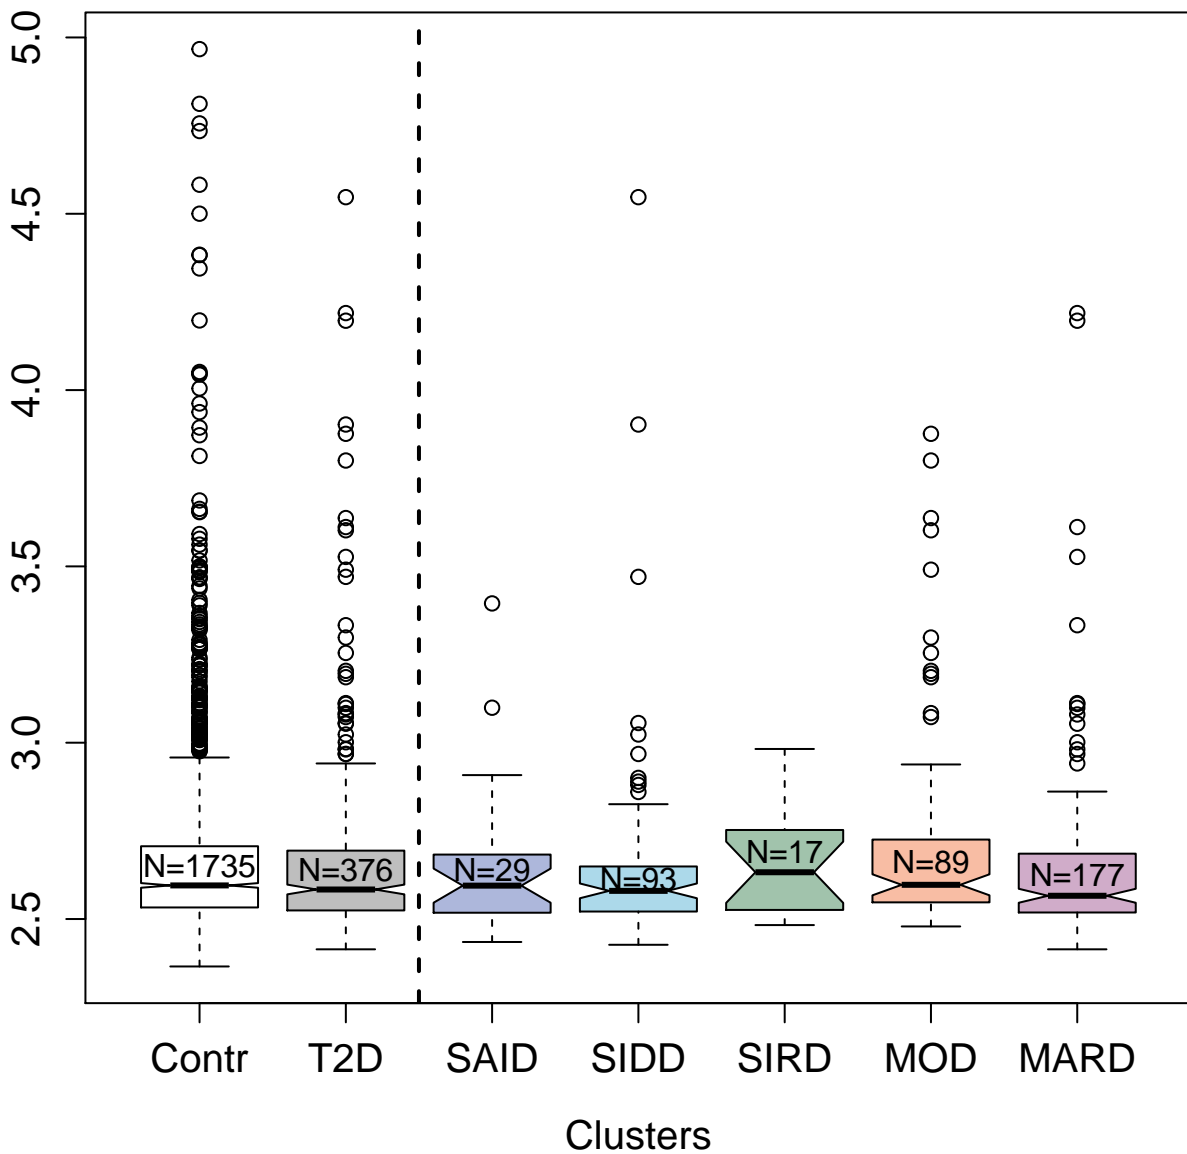

3477-63\_2 : High affinity nerve growth factor receptor

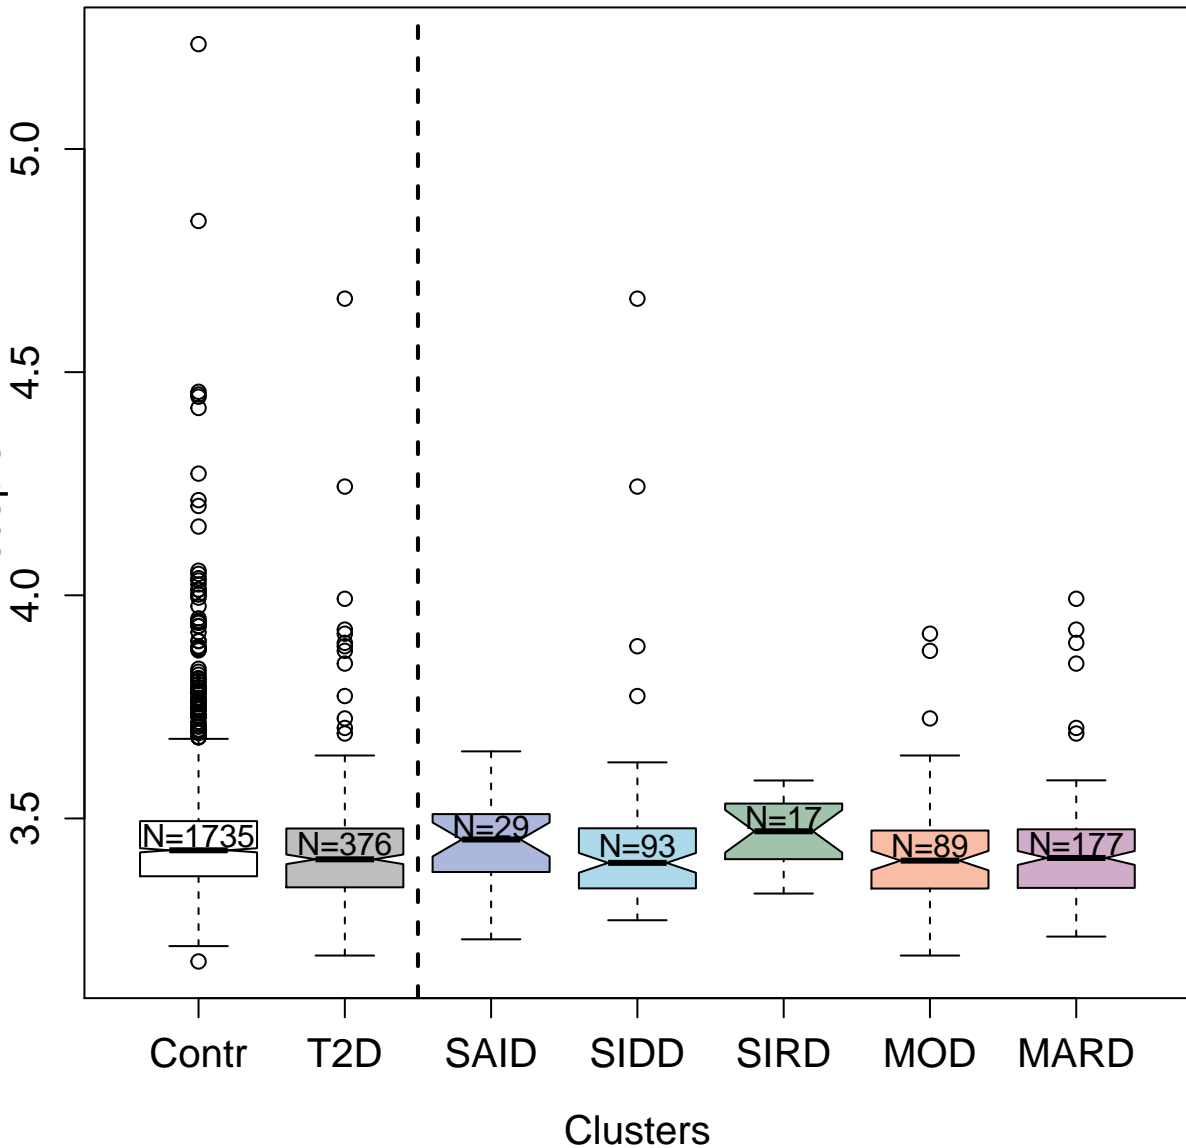

4703-87\_2 : Lymphotoxin-alpha

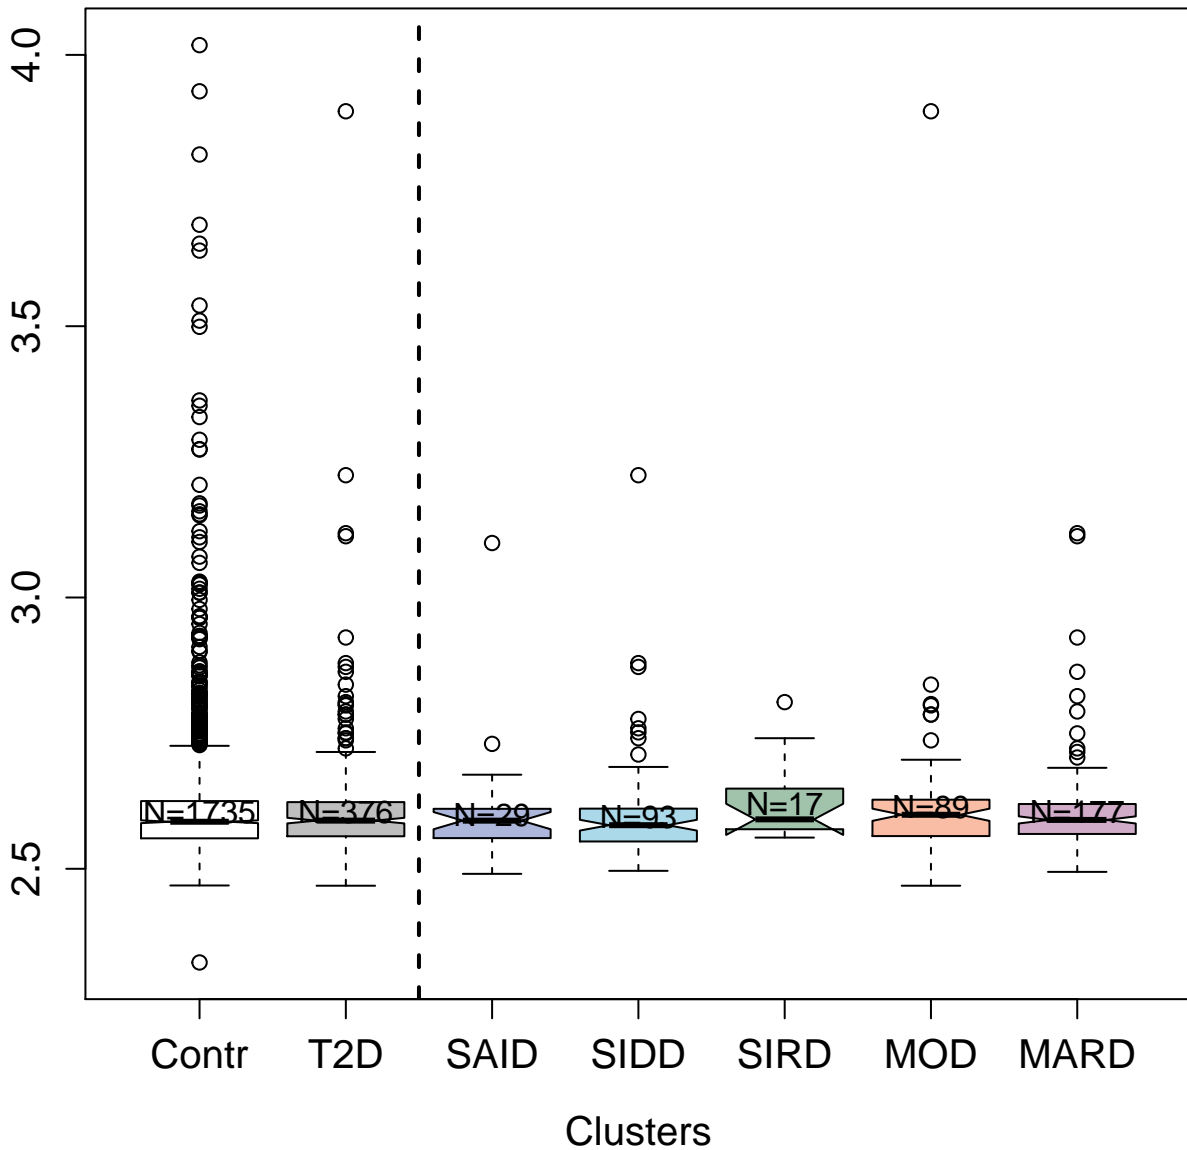

2925-9\_1 : Plasminogen activator inhibitor 1

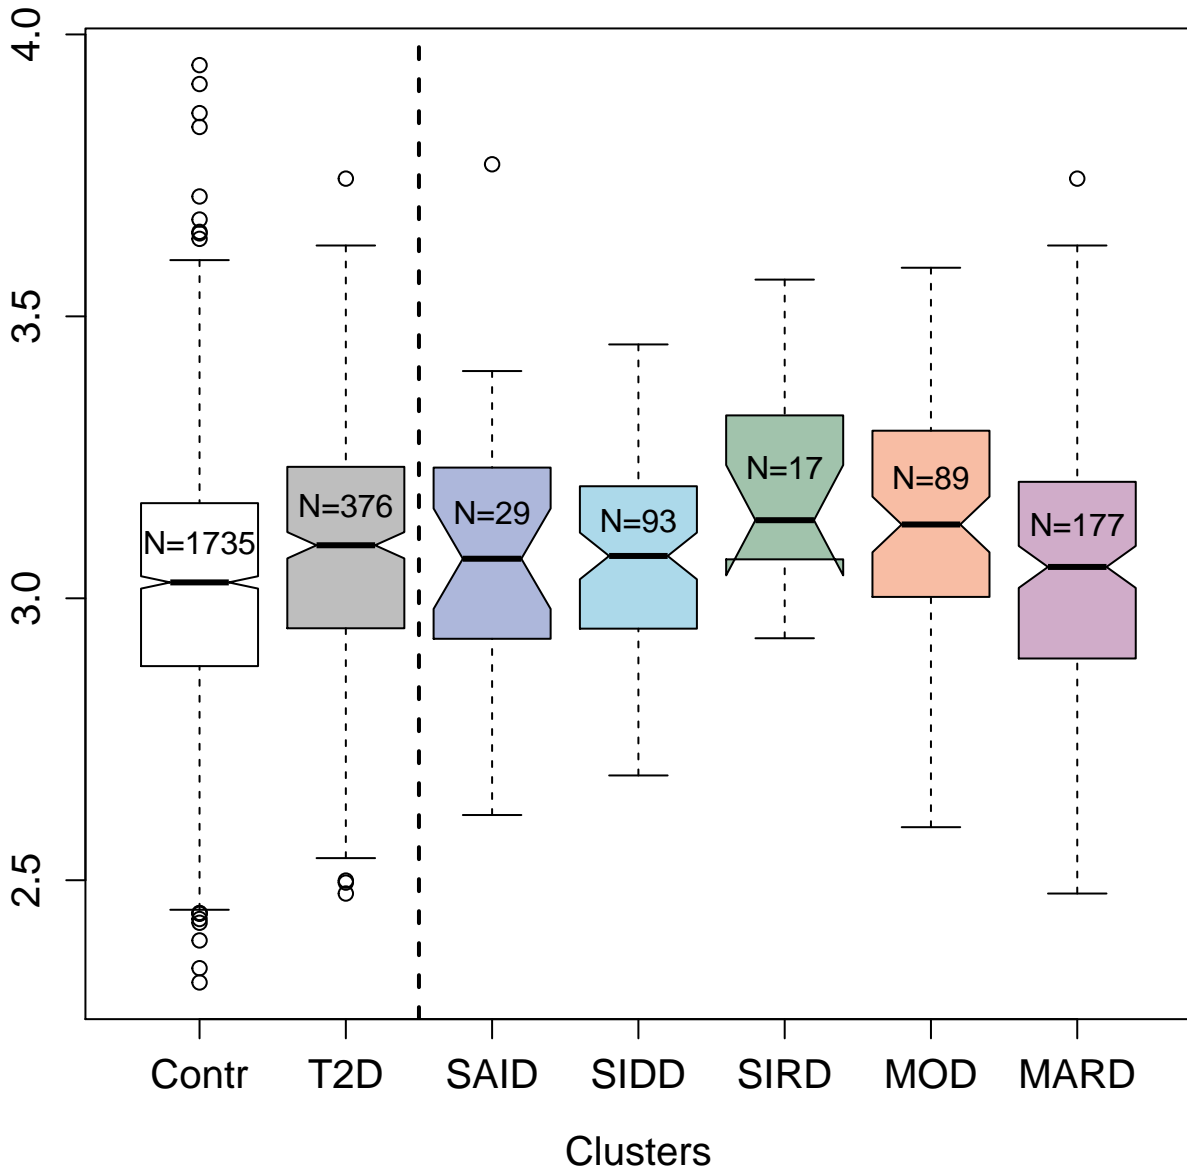

5002-76\_1 : Matrix metalloproteinase-14

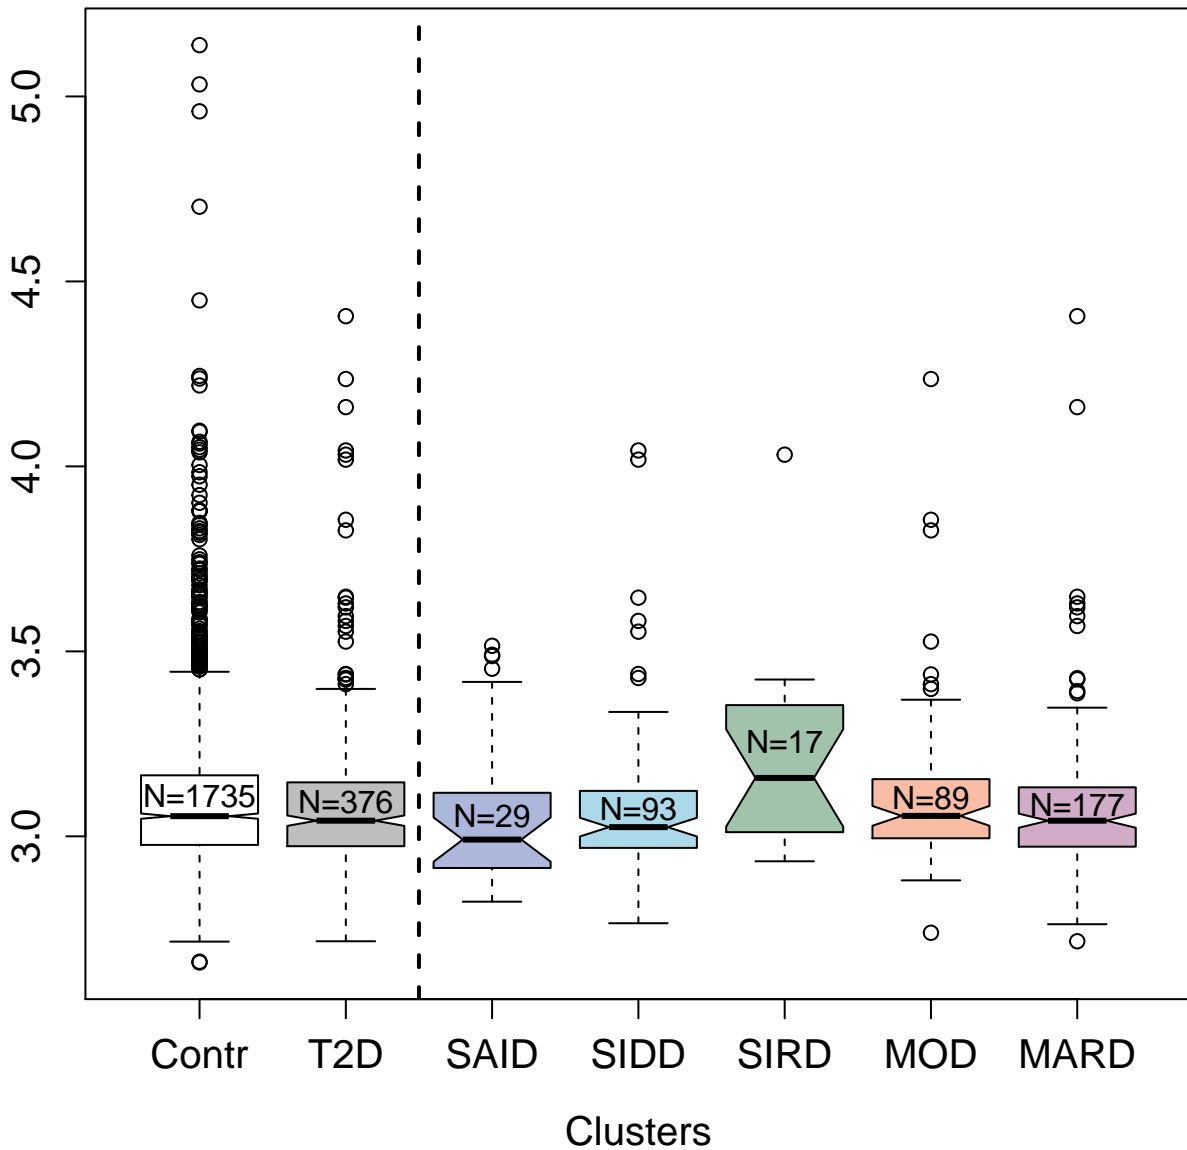



5246-64\_3 : cGMP-dependent 3':5'-cyclic phosphodiesterase

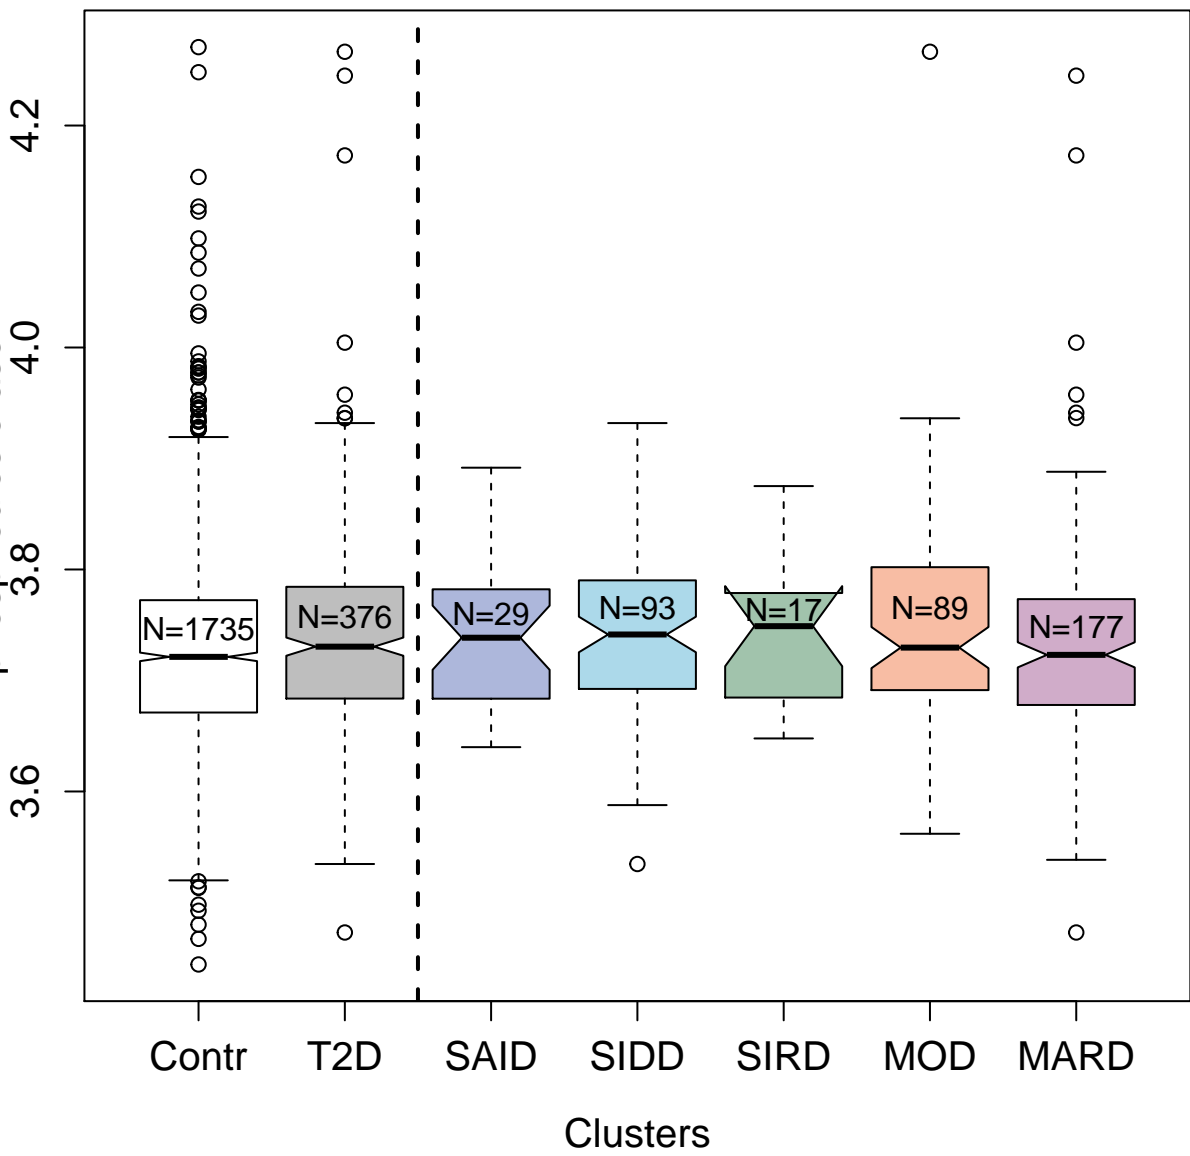

5130-67\_3 : Scavenger receptor class F member 2

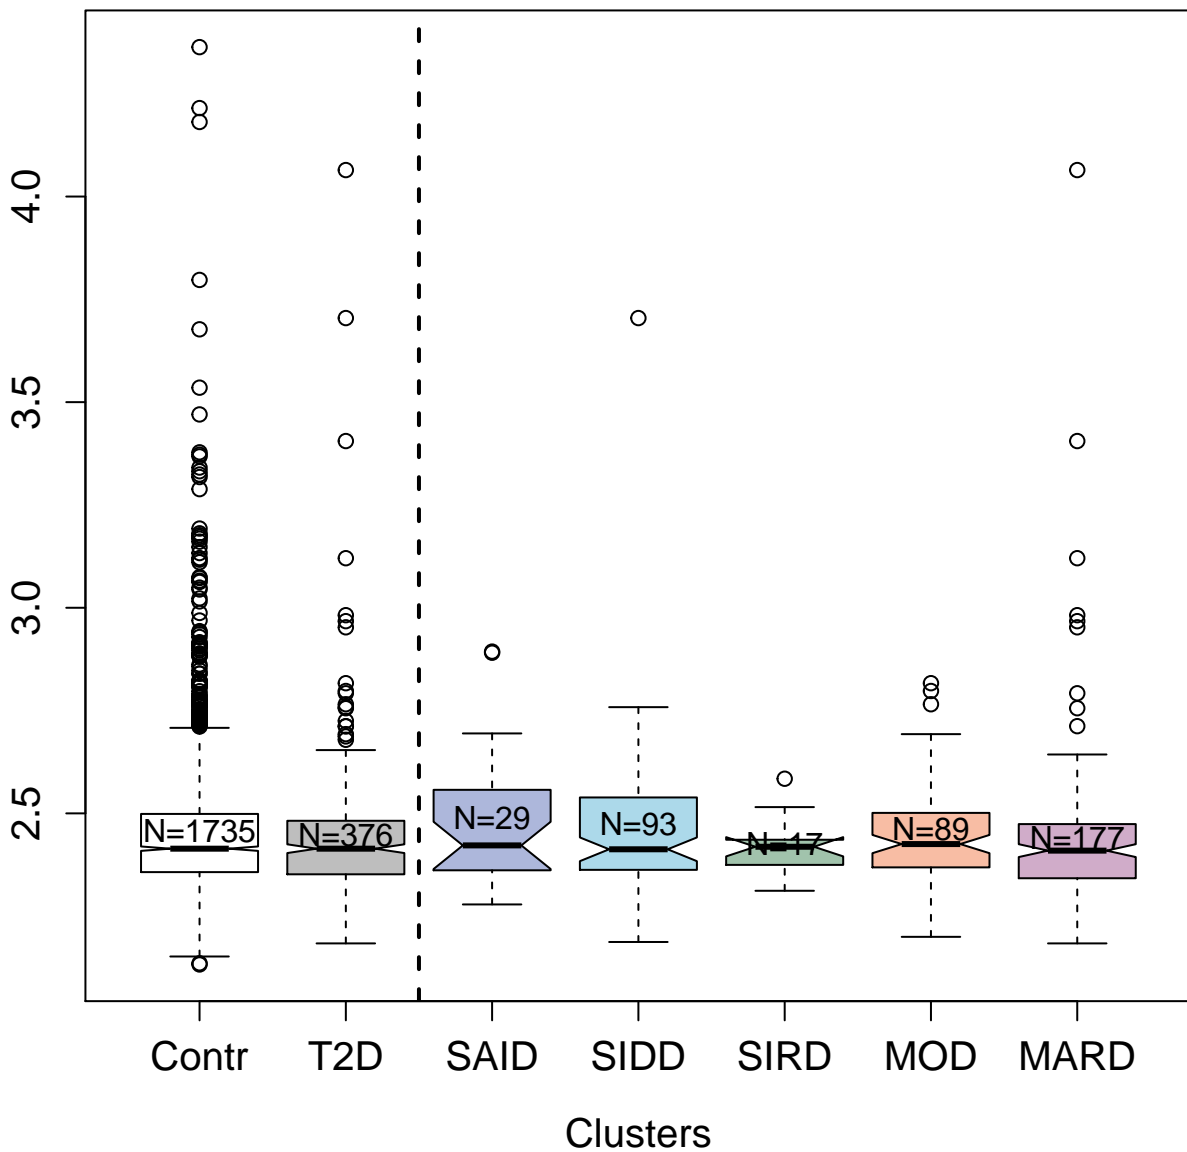

3821-28\_1 : MAP kinase-activated protein kinase 5

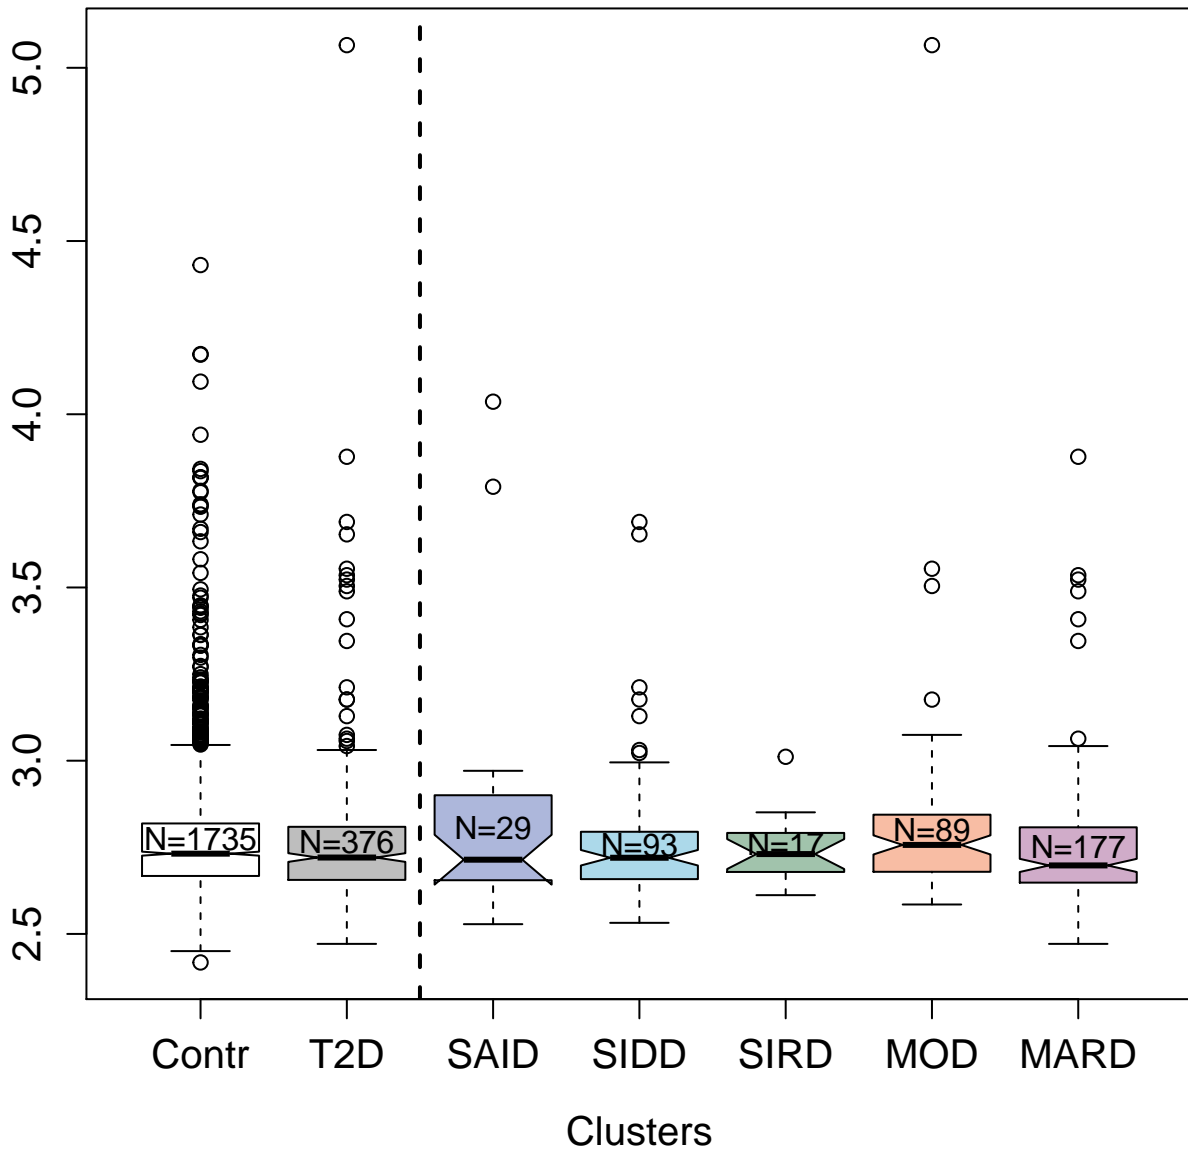

5478-50\_2 : Glutamate carboxypeptidase 2

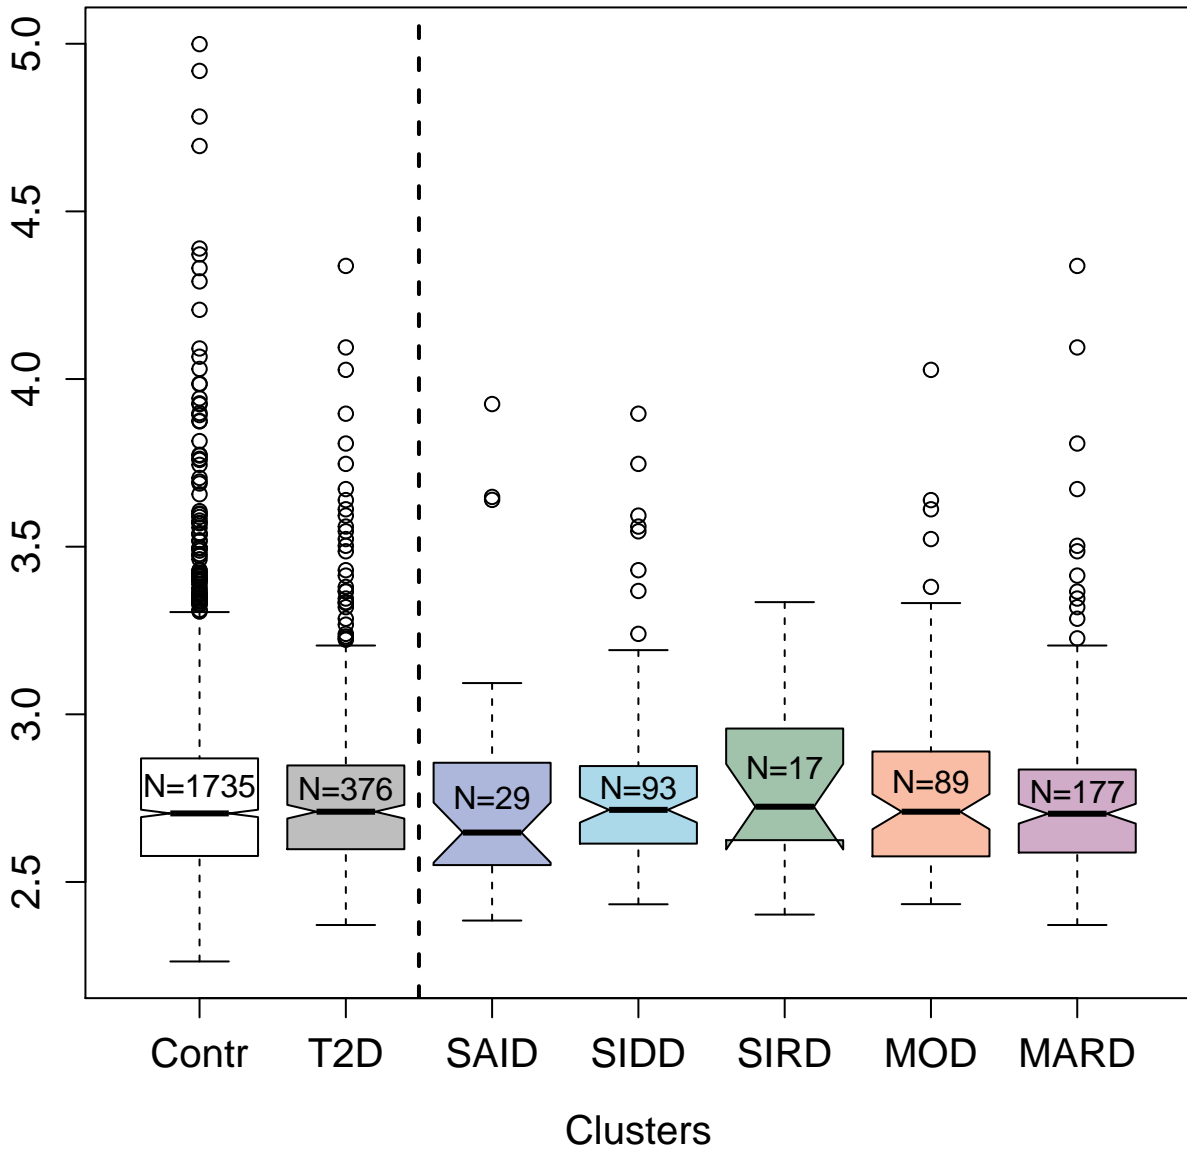

4771-10\_3 : Acid sphingomyelinase-like  
phosphodiesterase 3a

3.5  
4.0  
4.5  
5.0

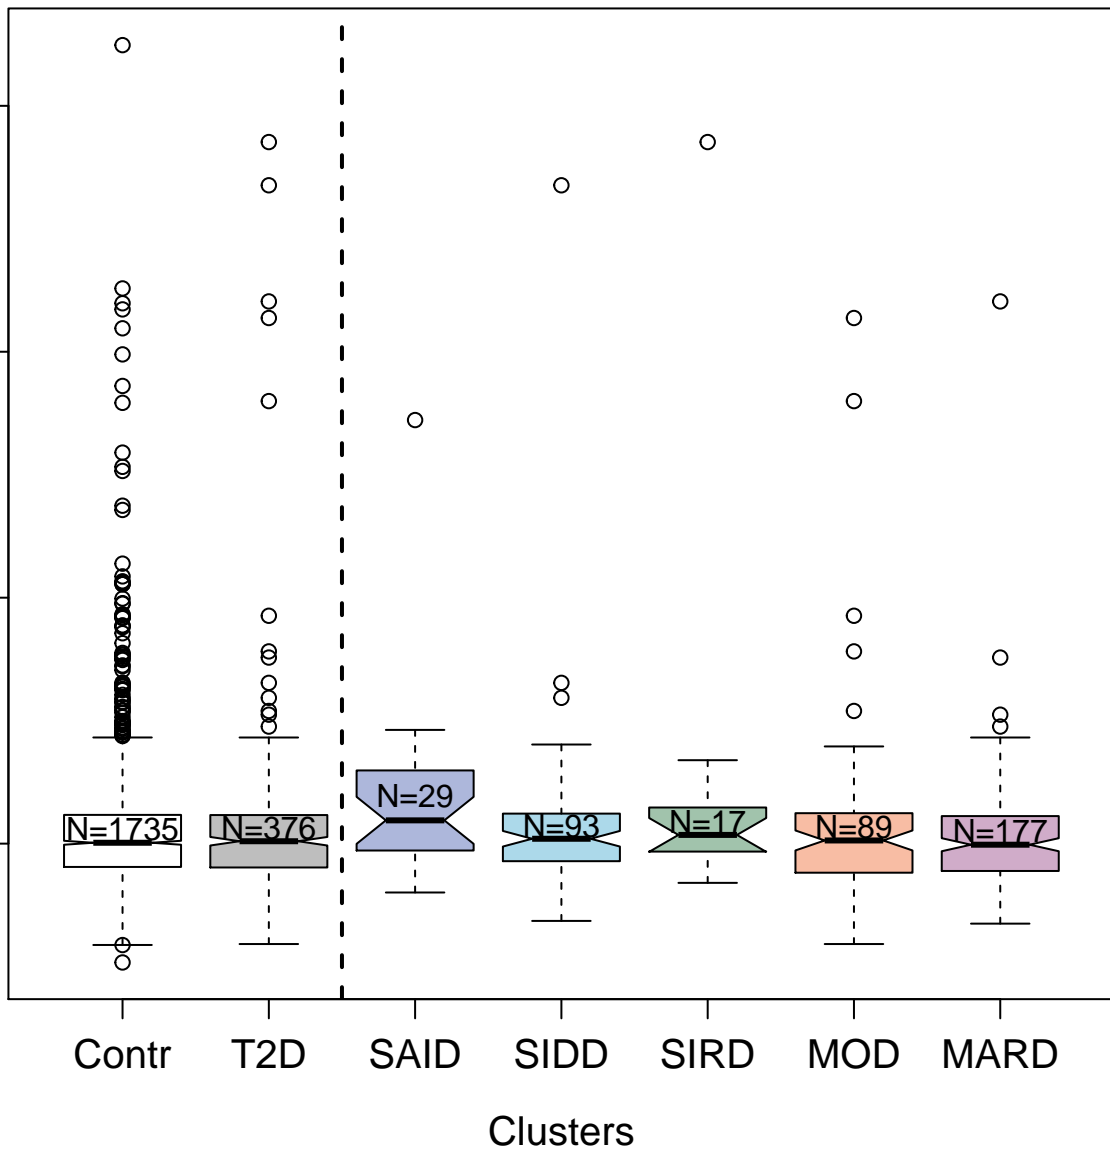

4397-26\_2 : Interferon lambda-2

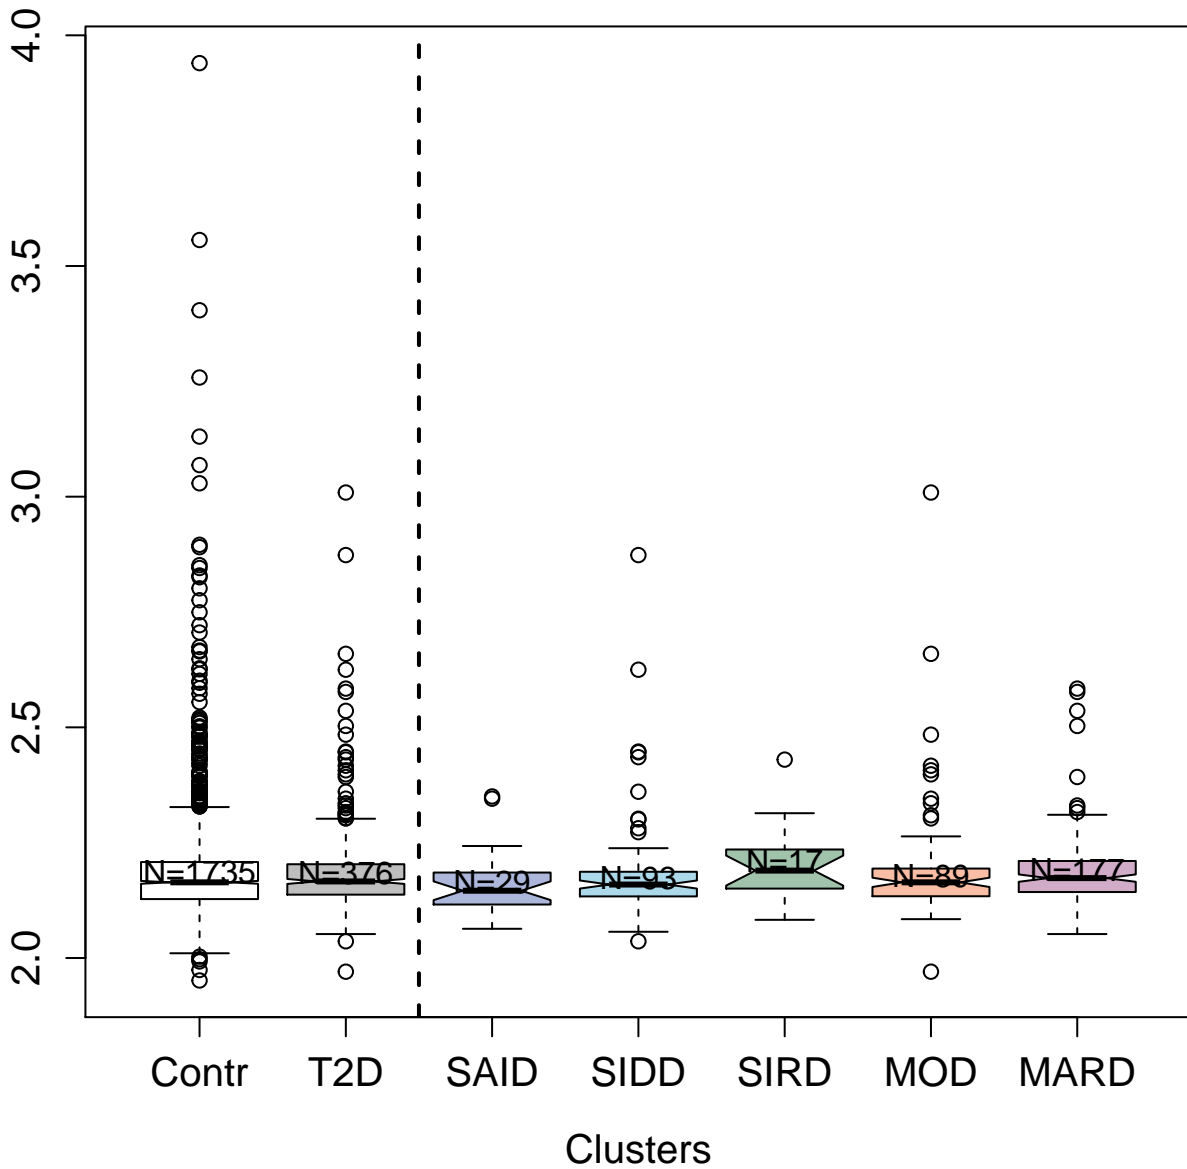

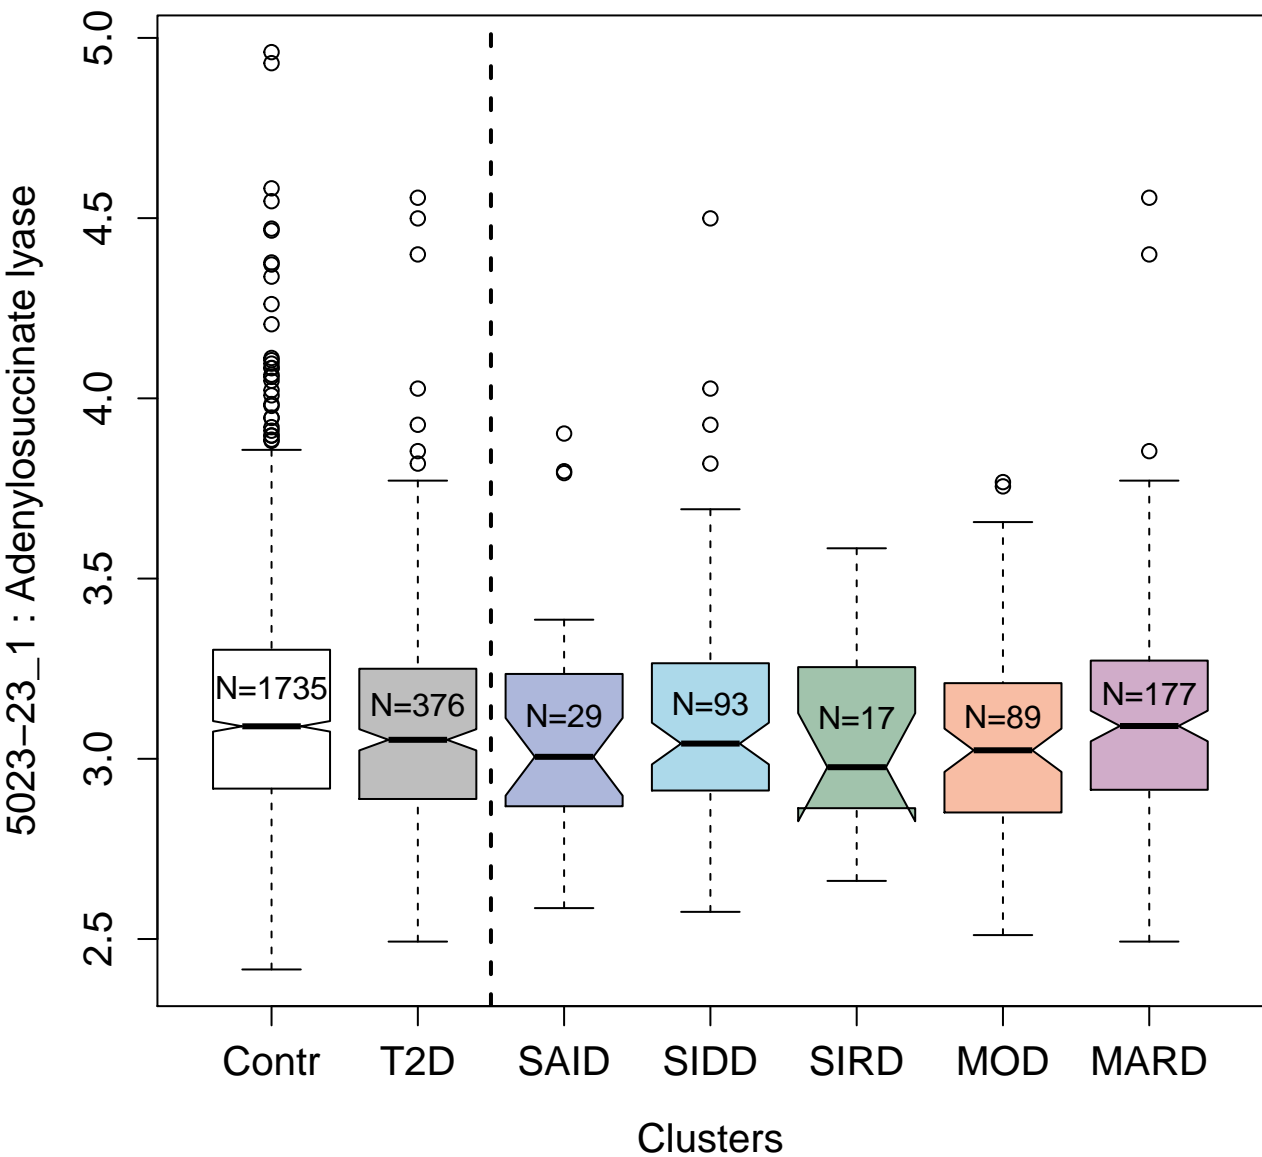

5457-5\_2 : Collectin-12

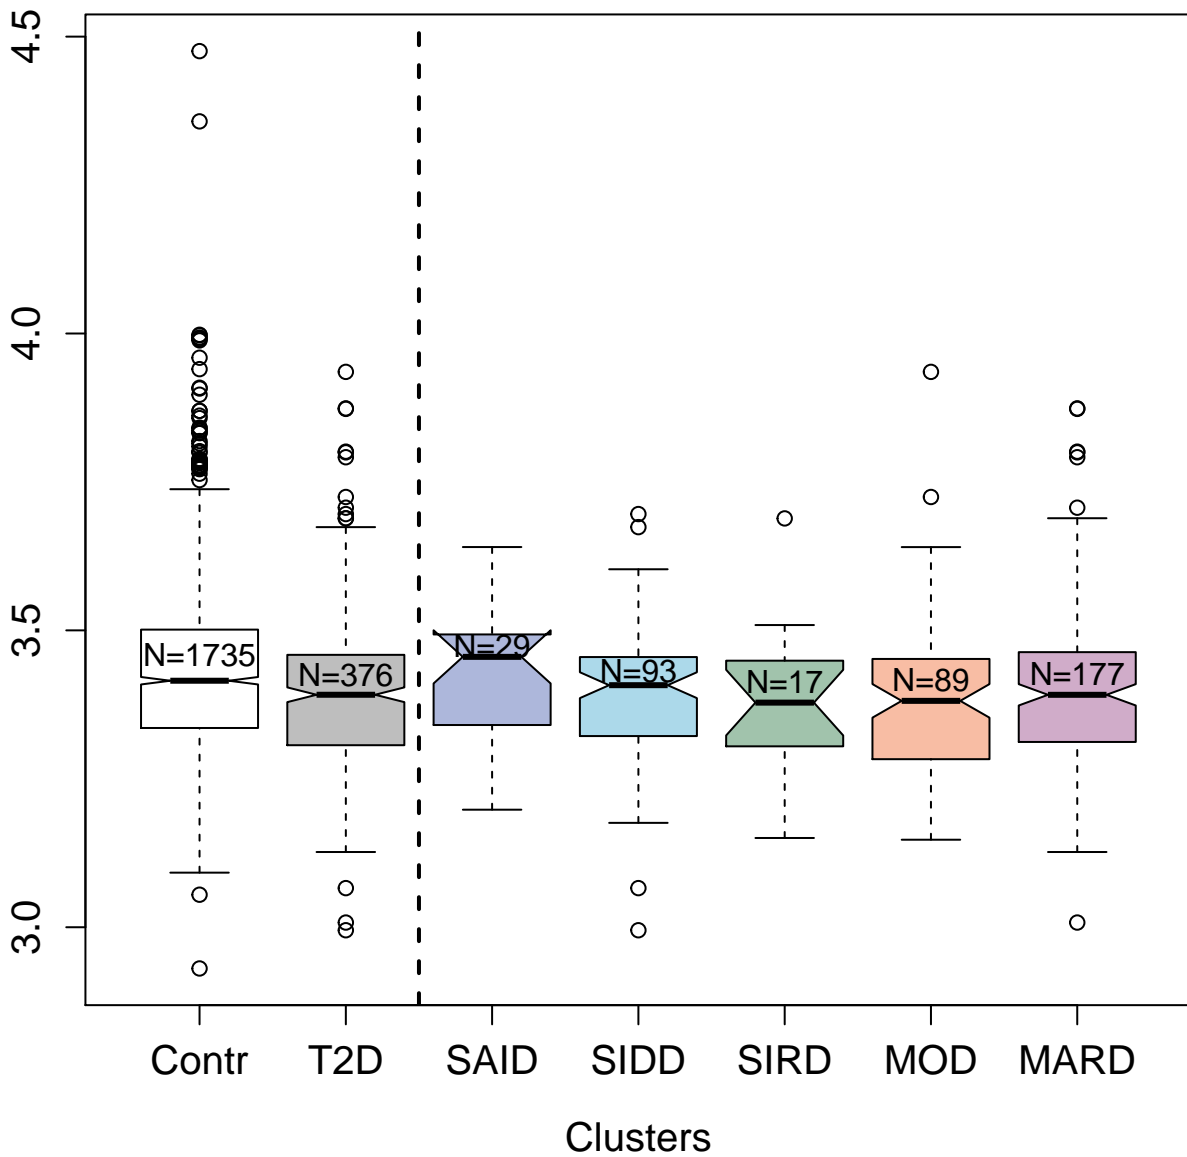



5129-12\_3 : Scavenger receptor class F member 1

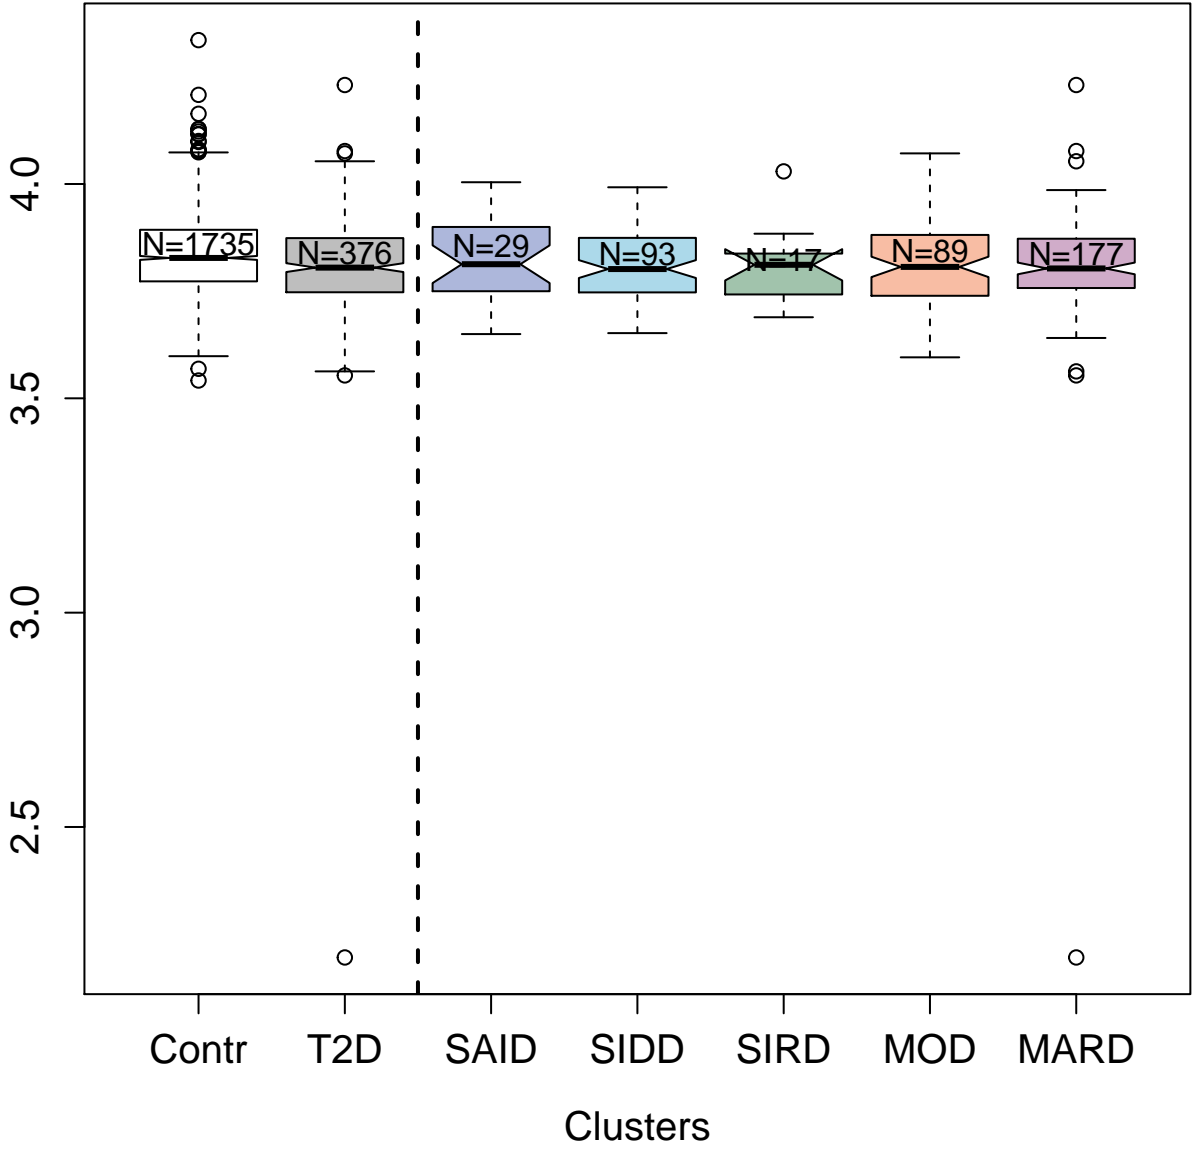

3766-51\_4 : Syntaxin-1A

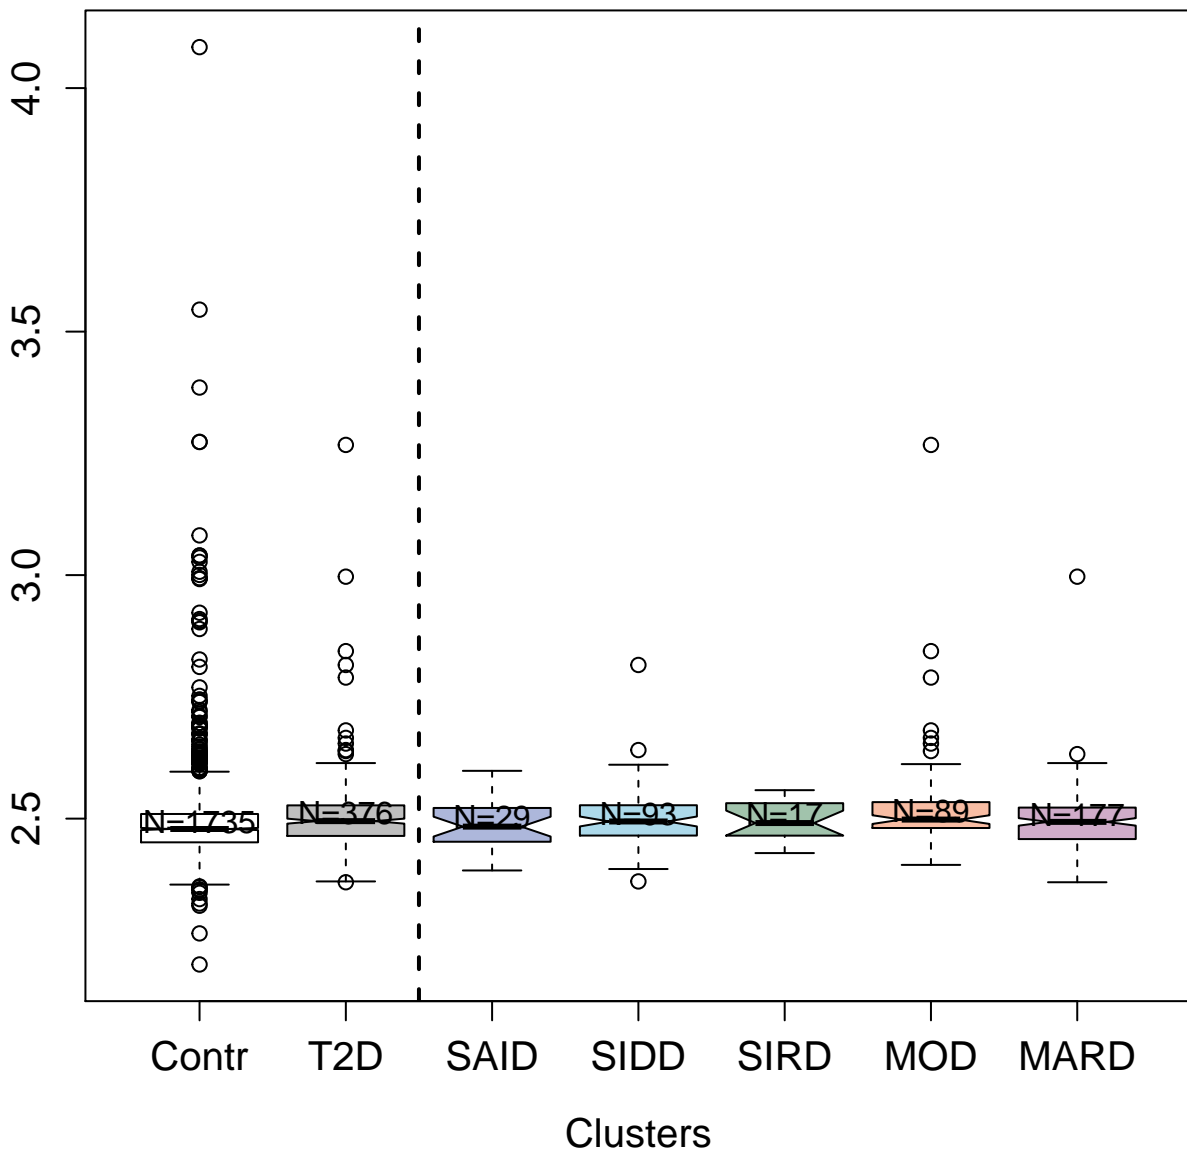

2982-82\_2 : Galectin-4

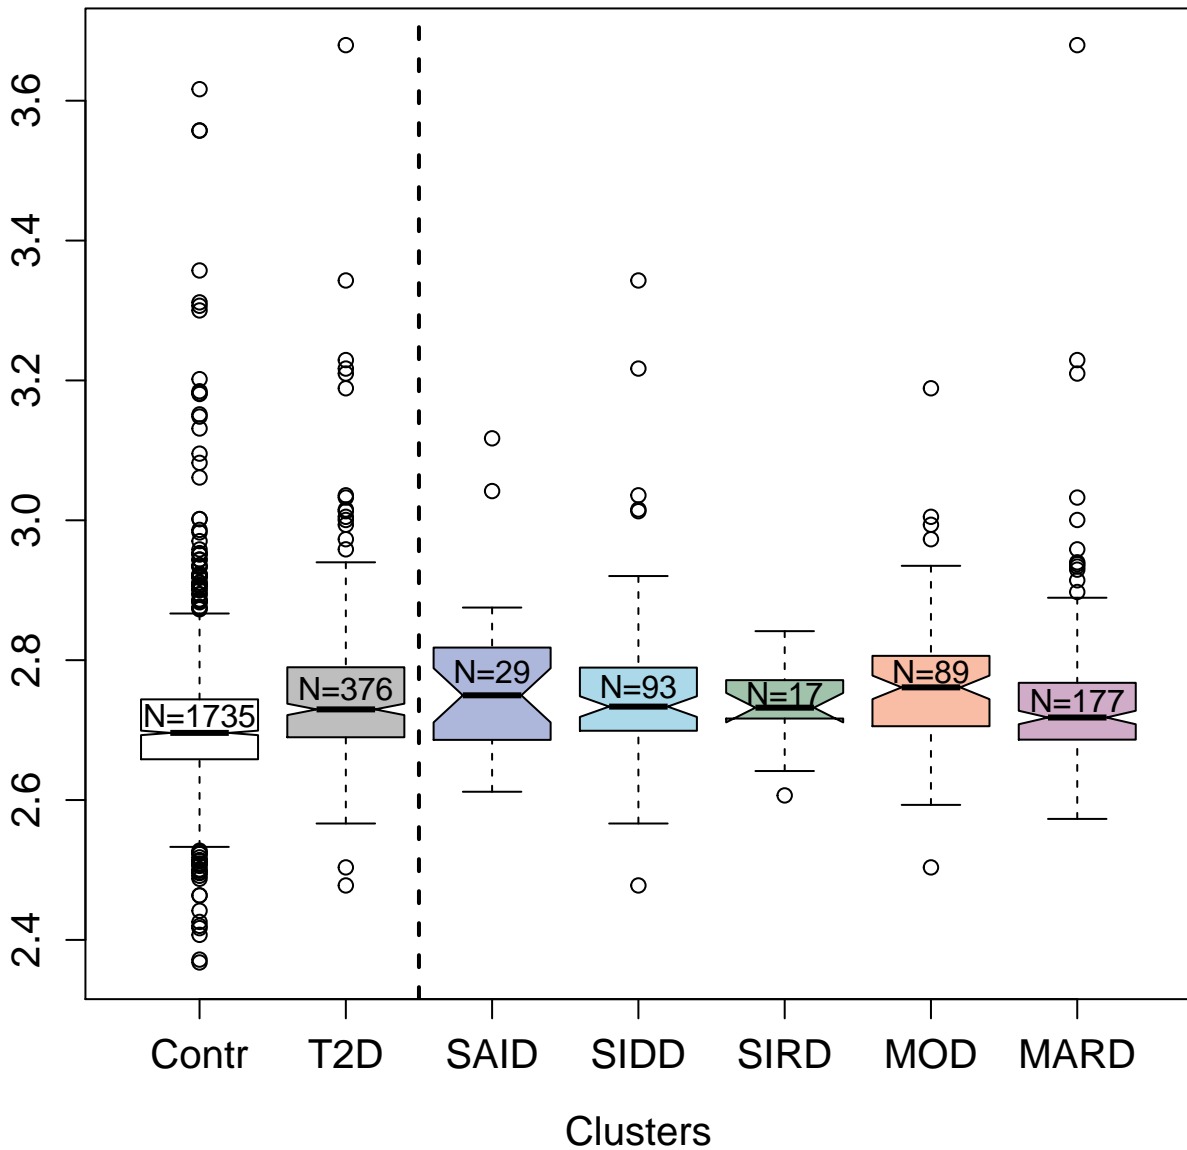

3184-25\_2 : Coagulation factor VII

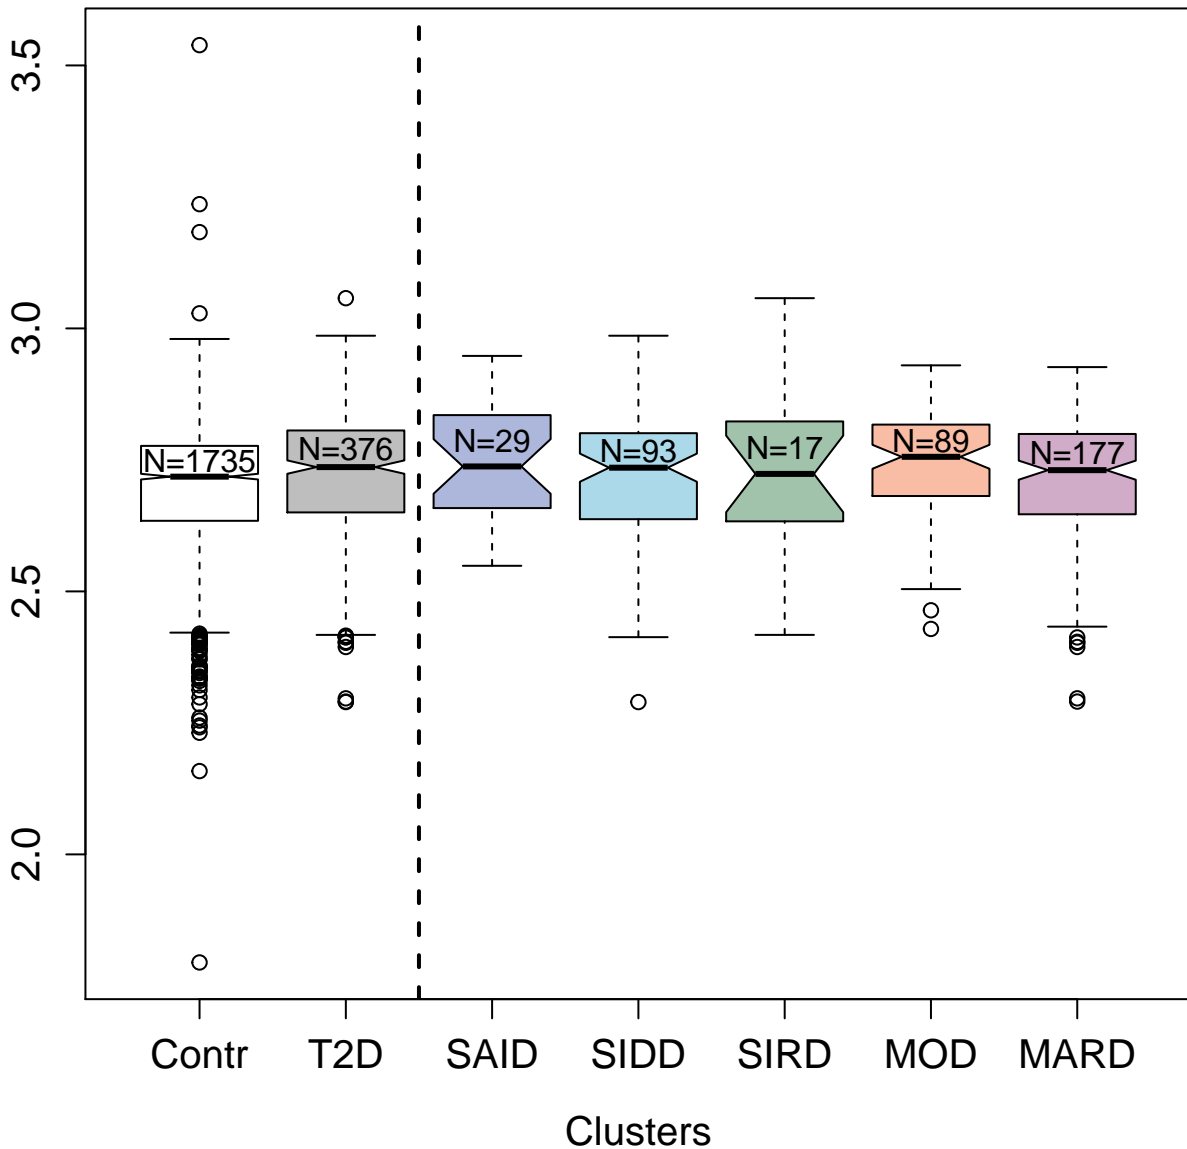

14128-121\_3 : Interferon alpha-10

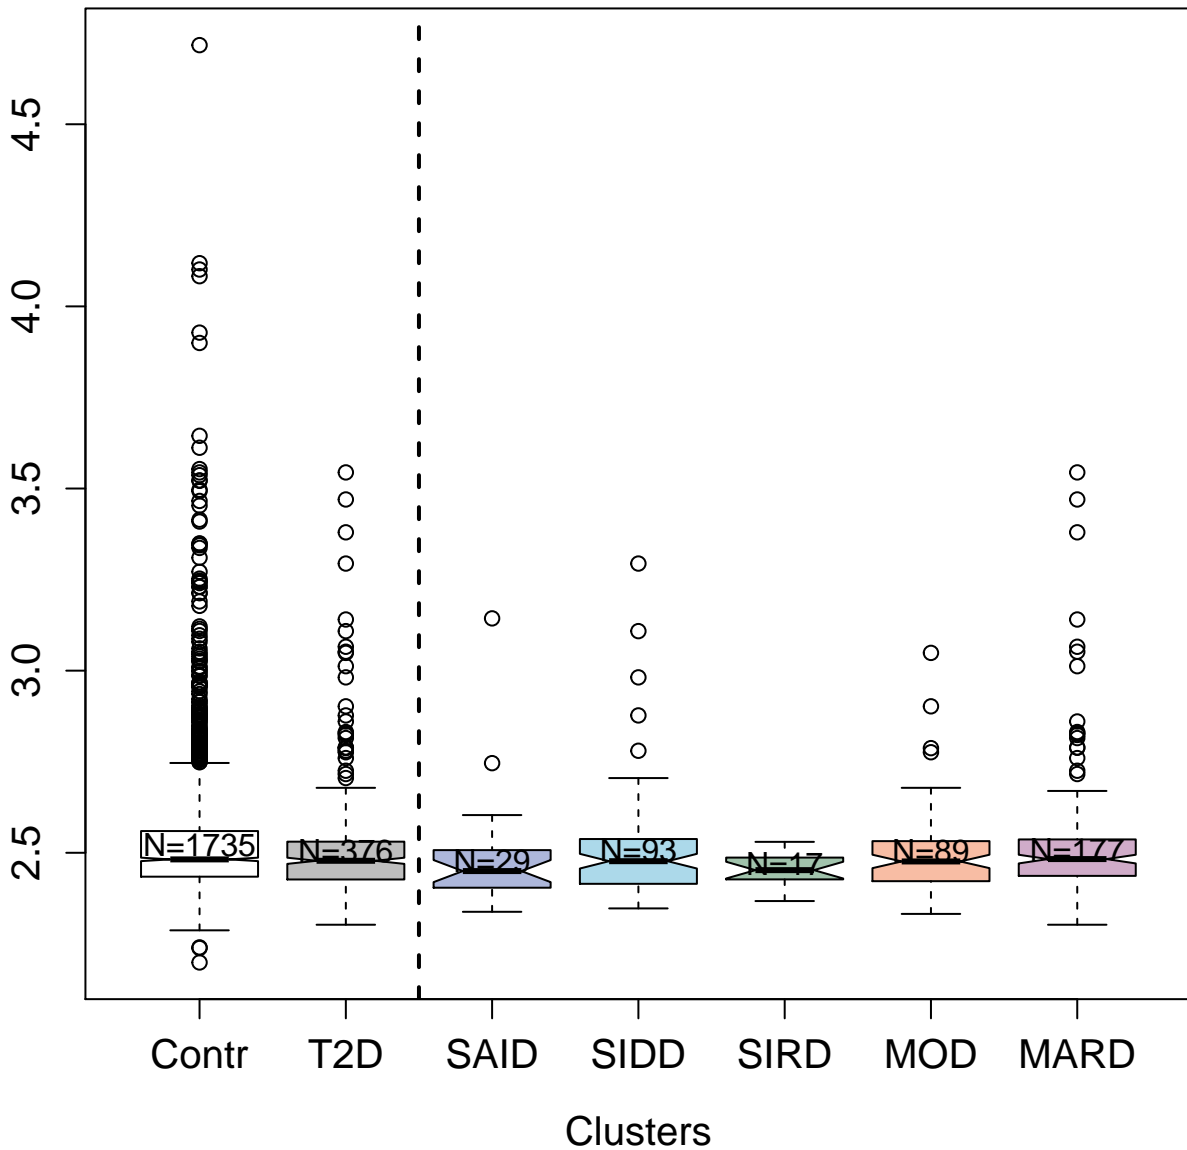

13130-150\_3 : Hexokinase-2

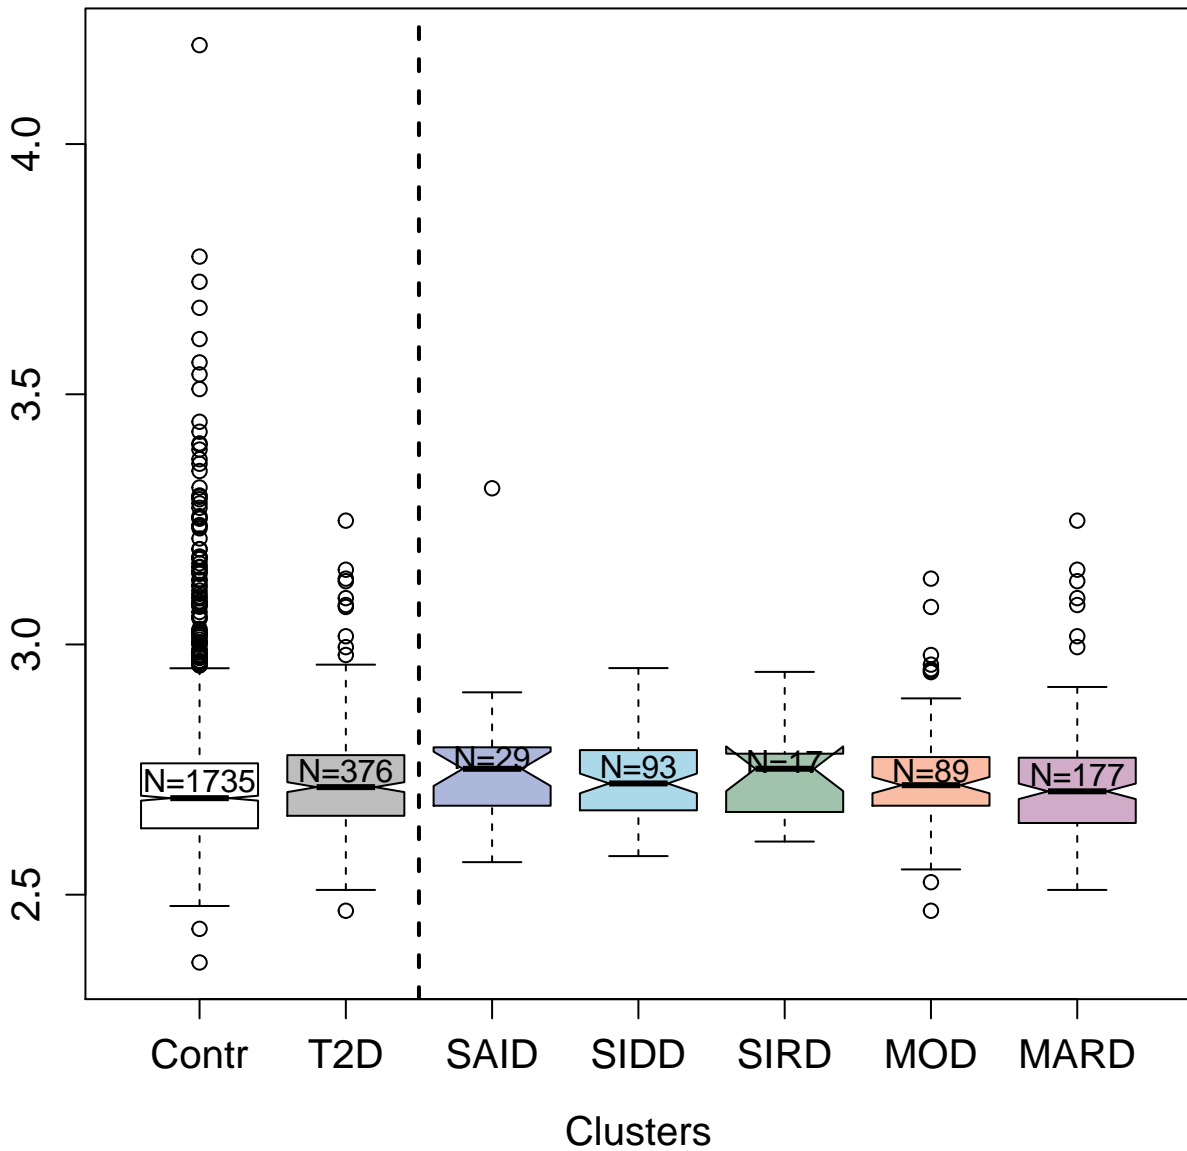

3427-63\_2 : Casein kinase II subunit alpha

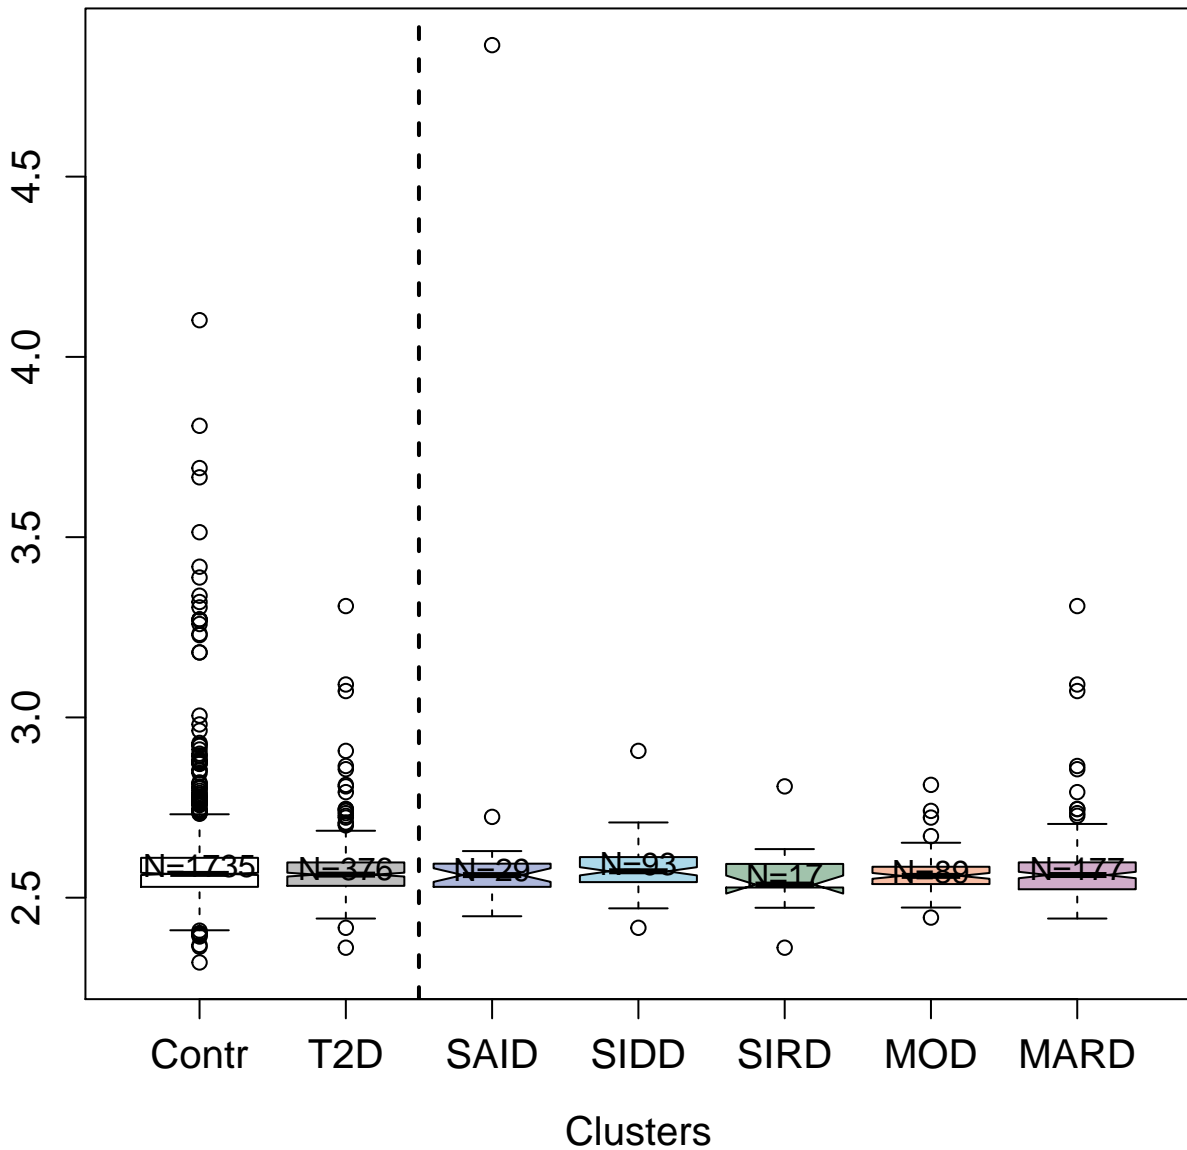

13117-232\_3 : Choline/ethanolamine kinase

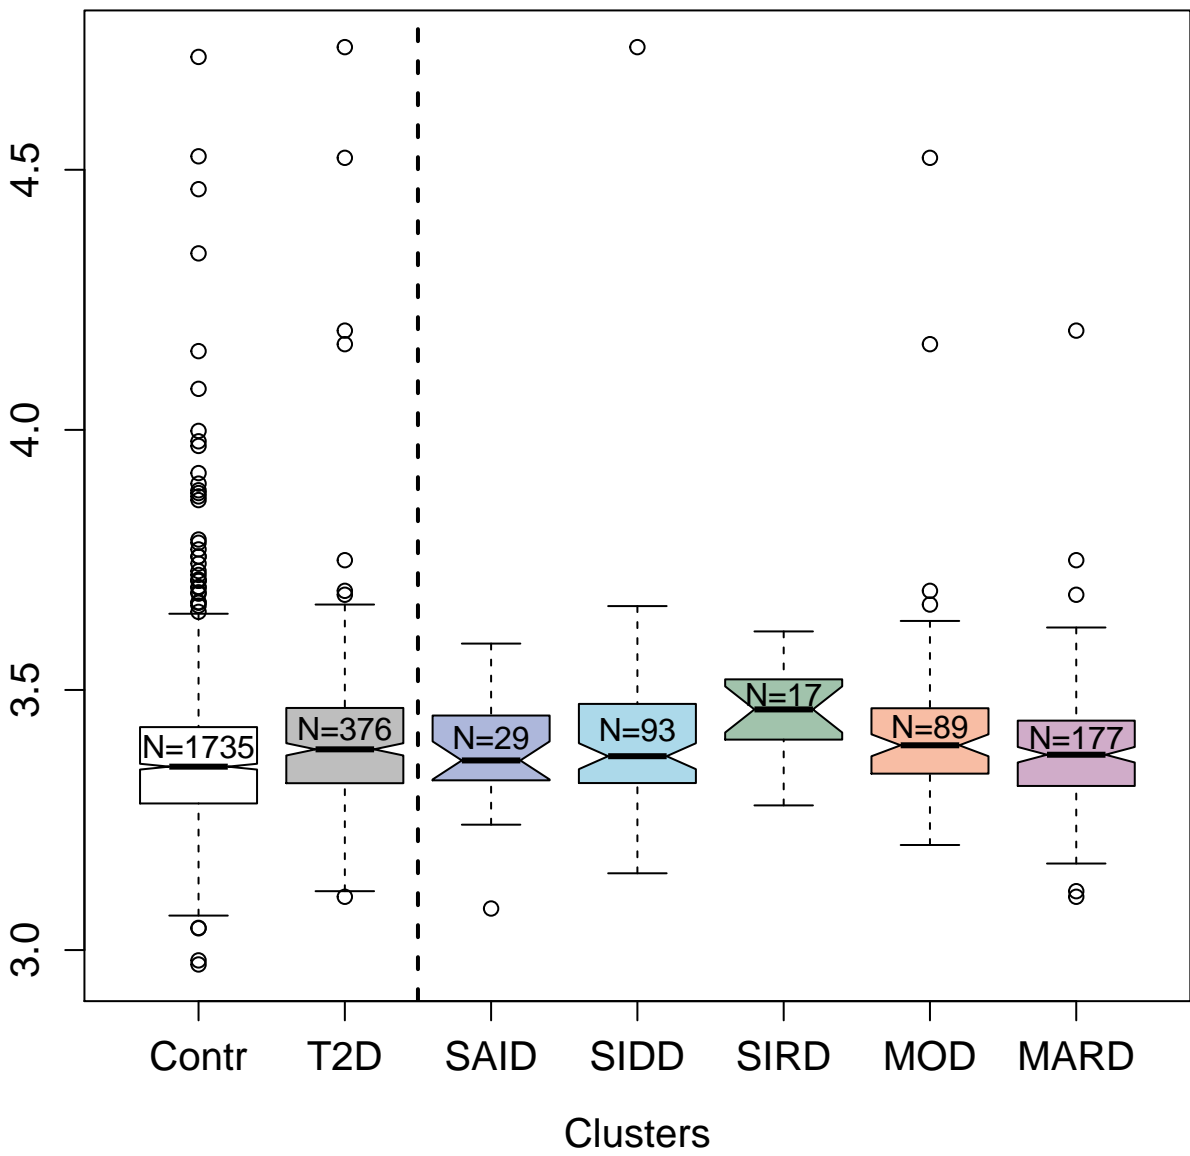



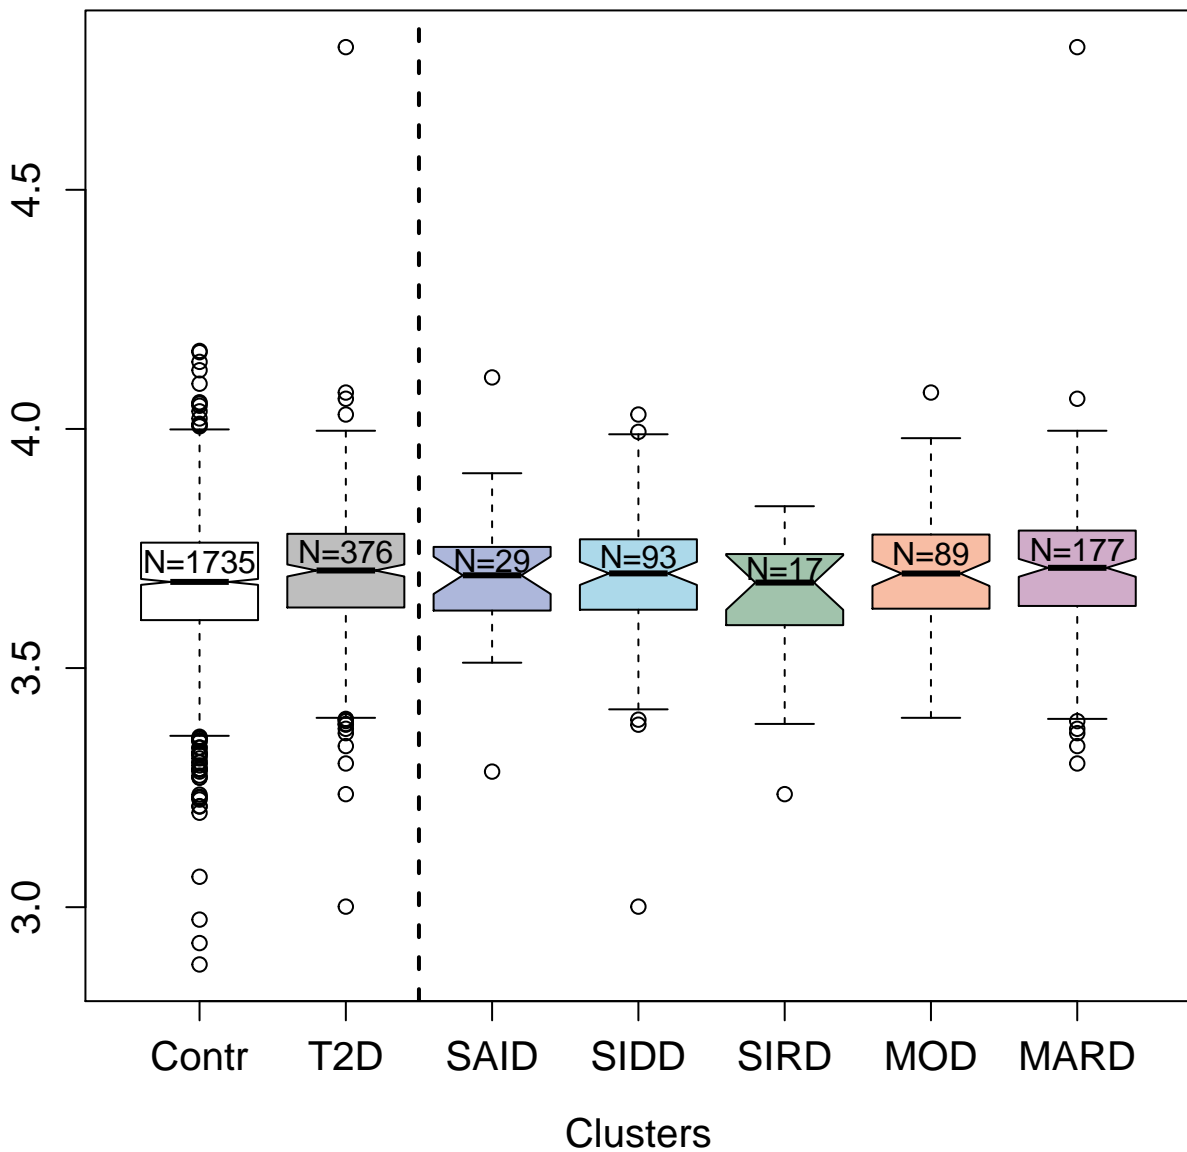

2624-31\_2 : Protein E7\_HP18

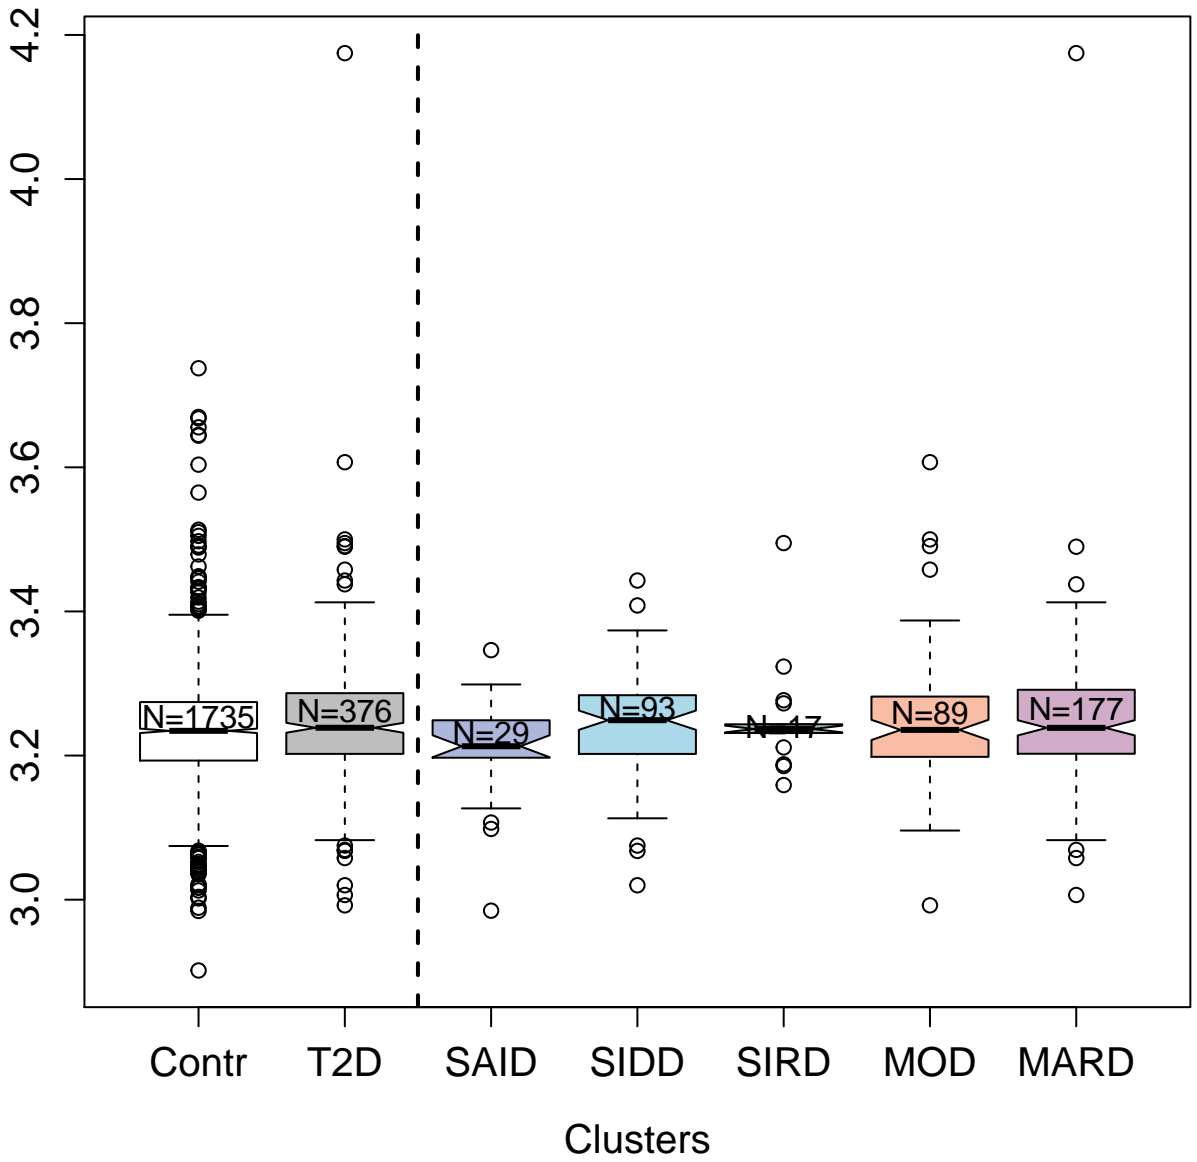

2750-3\_2 : Apolipoprotein A-I

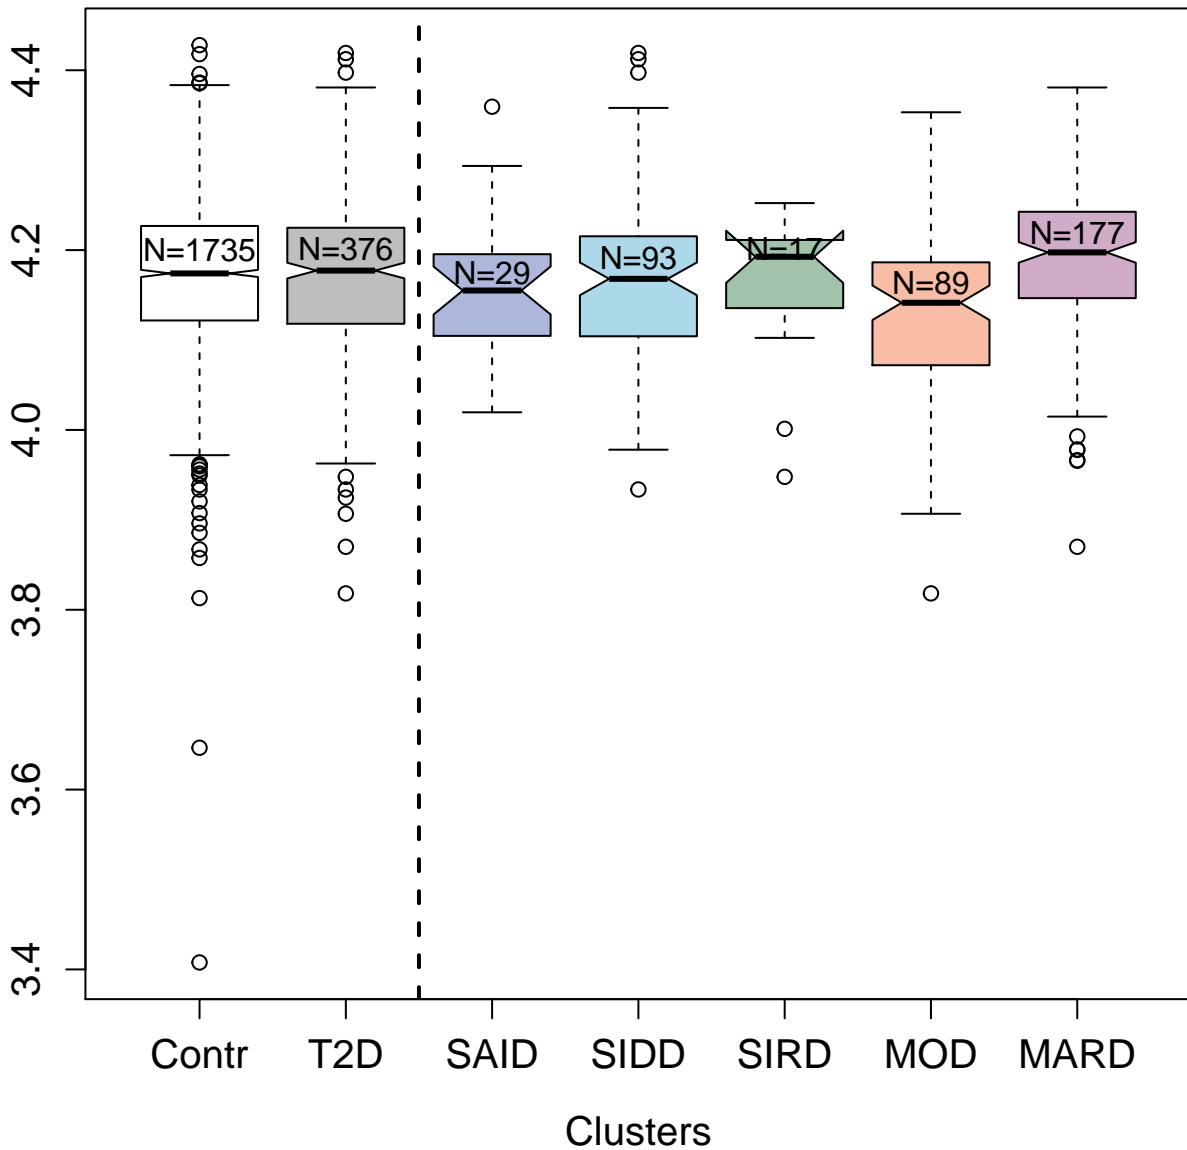

4144-13\_1 : C-C motif chemokine 13

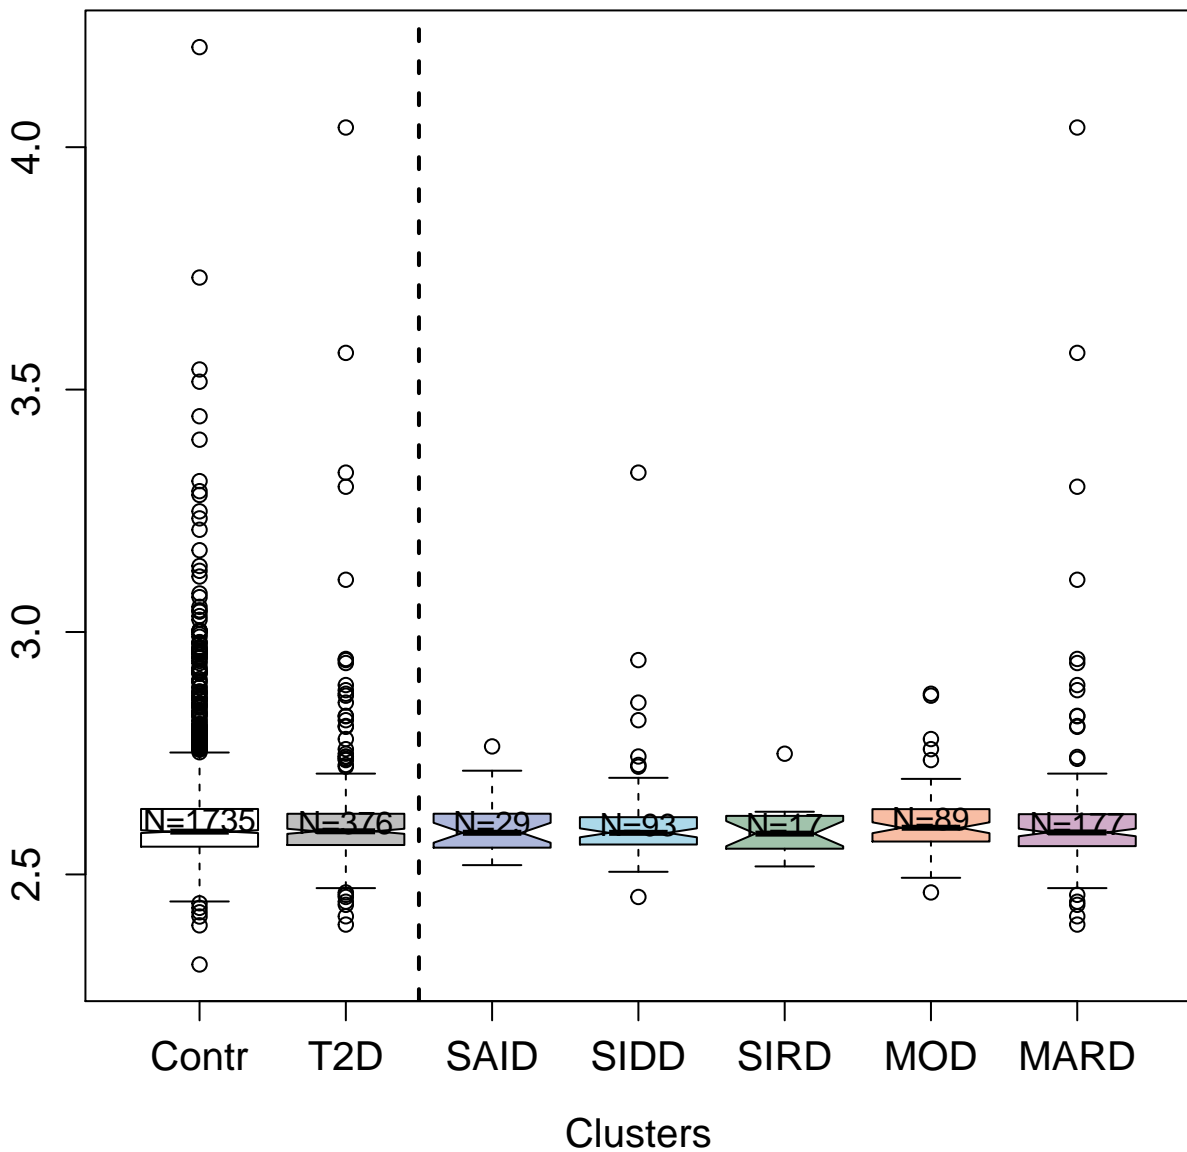

3065-65\_1 : Fibroblast growth factor 5

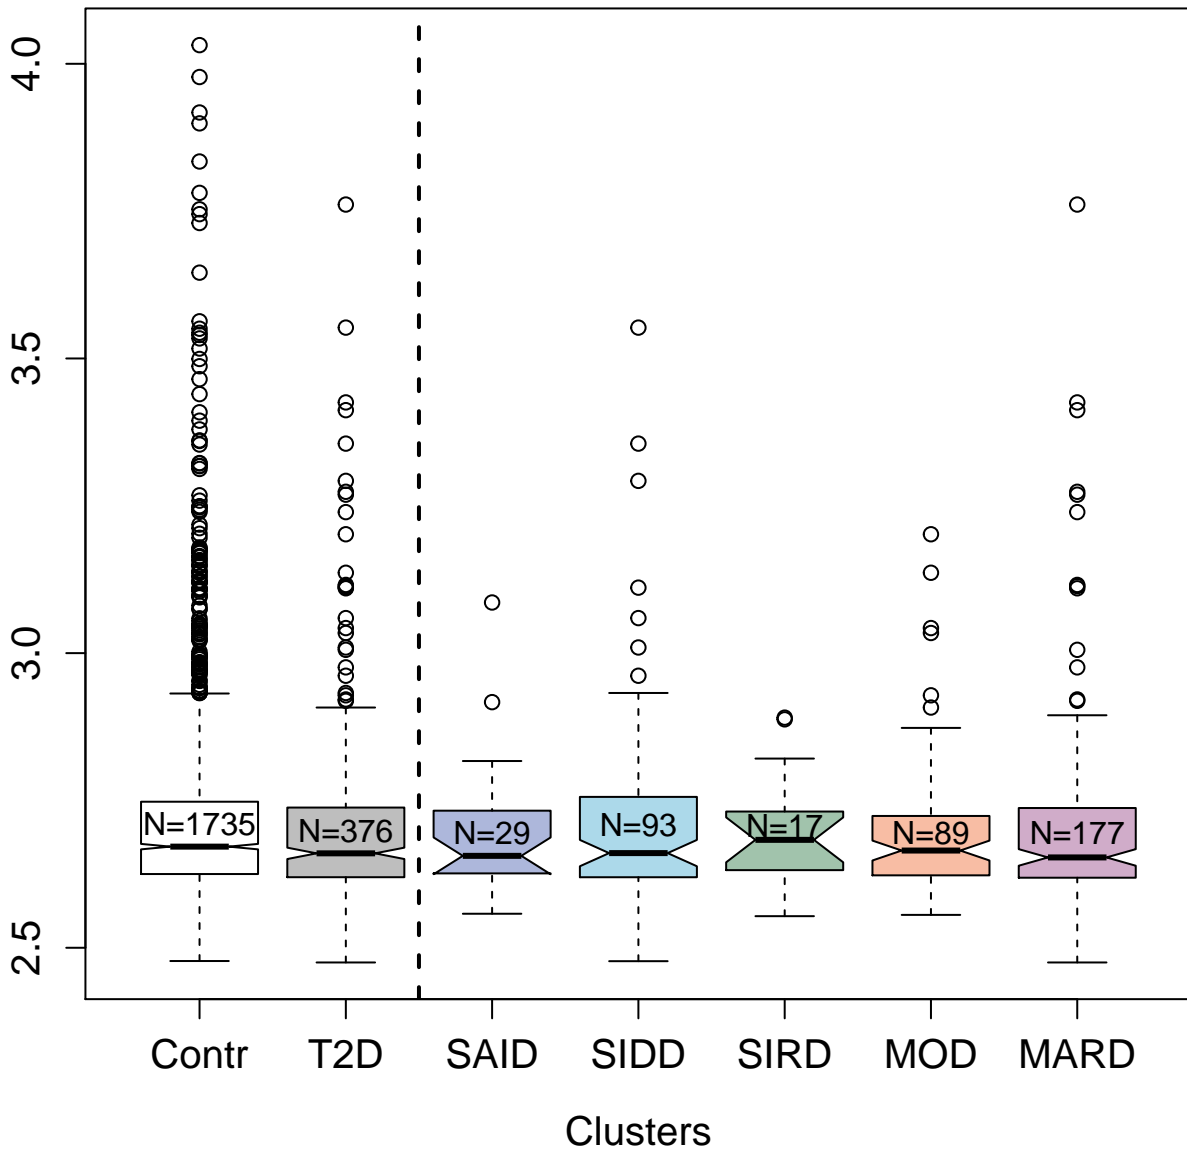

8462-18\_3 : Somatotropin

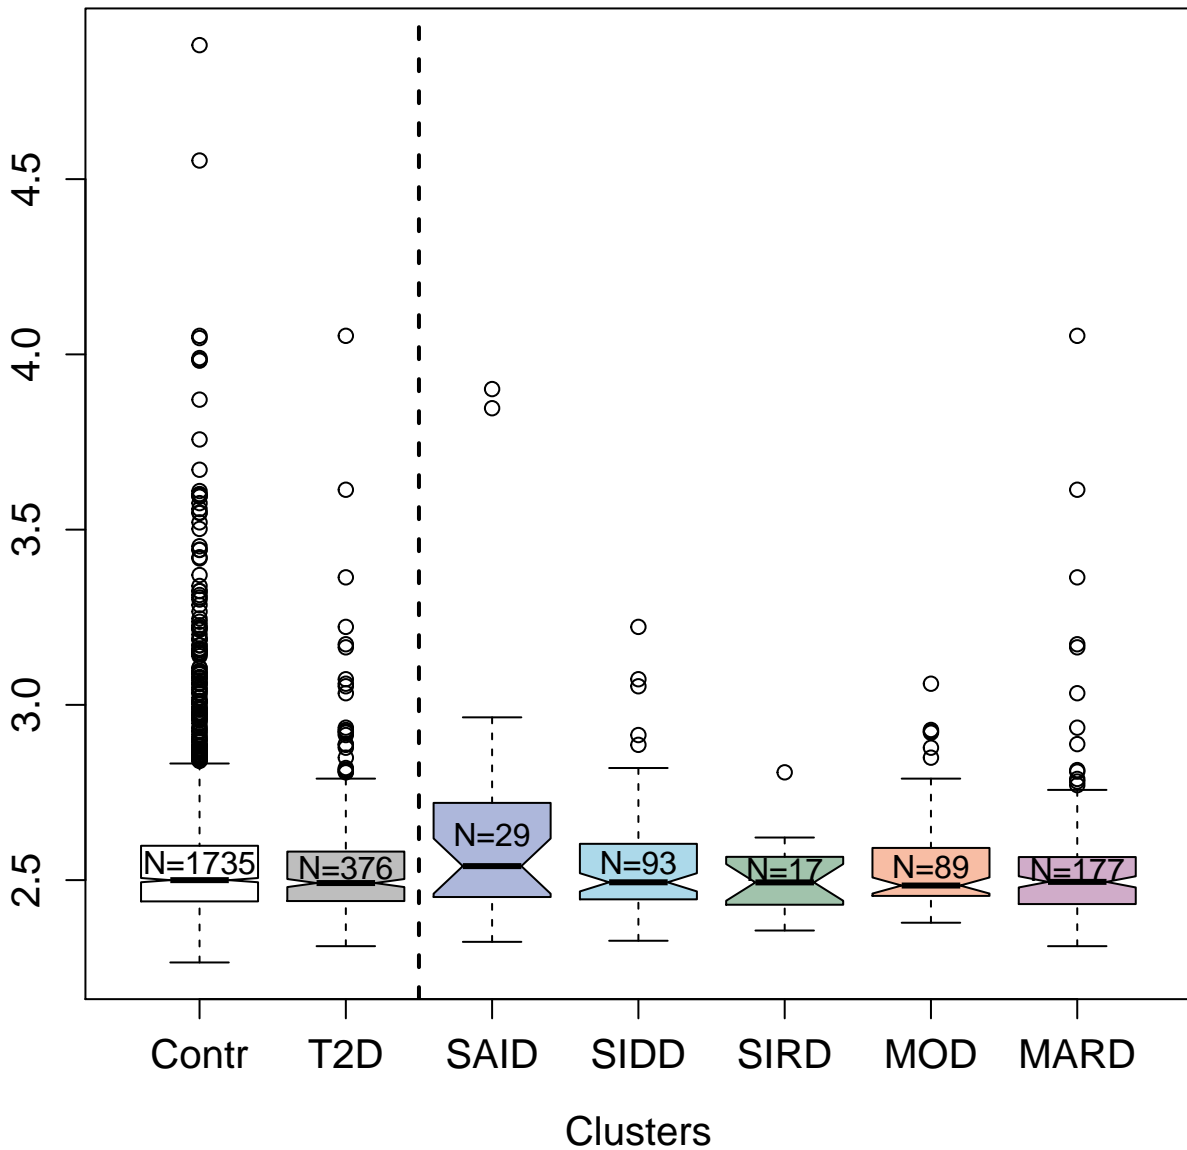

2985-35\_1 : Growth-regulated alpha protein

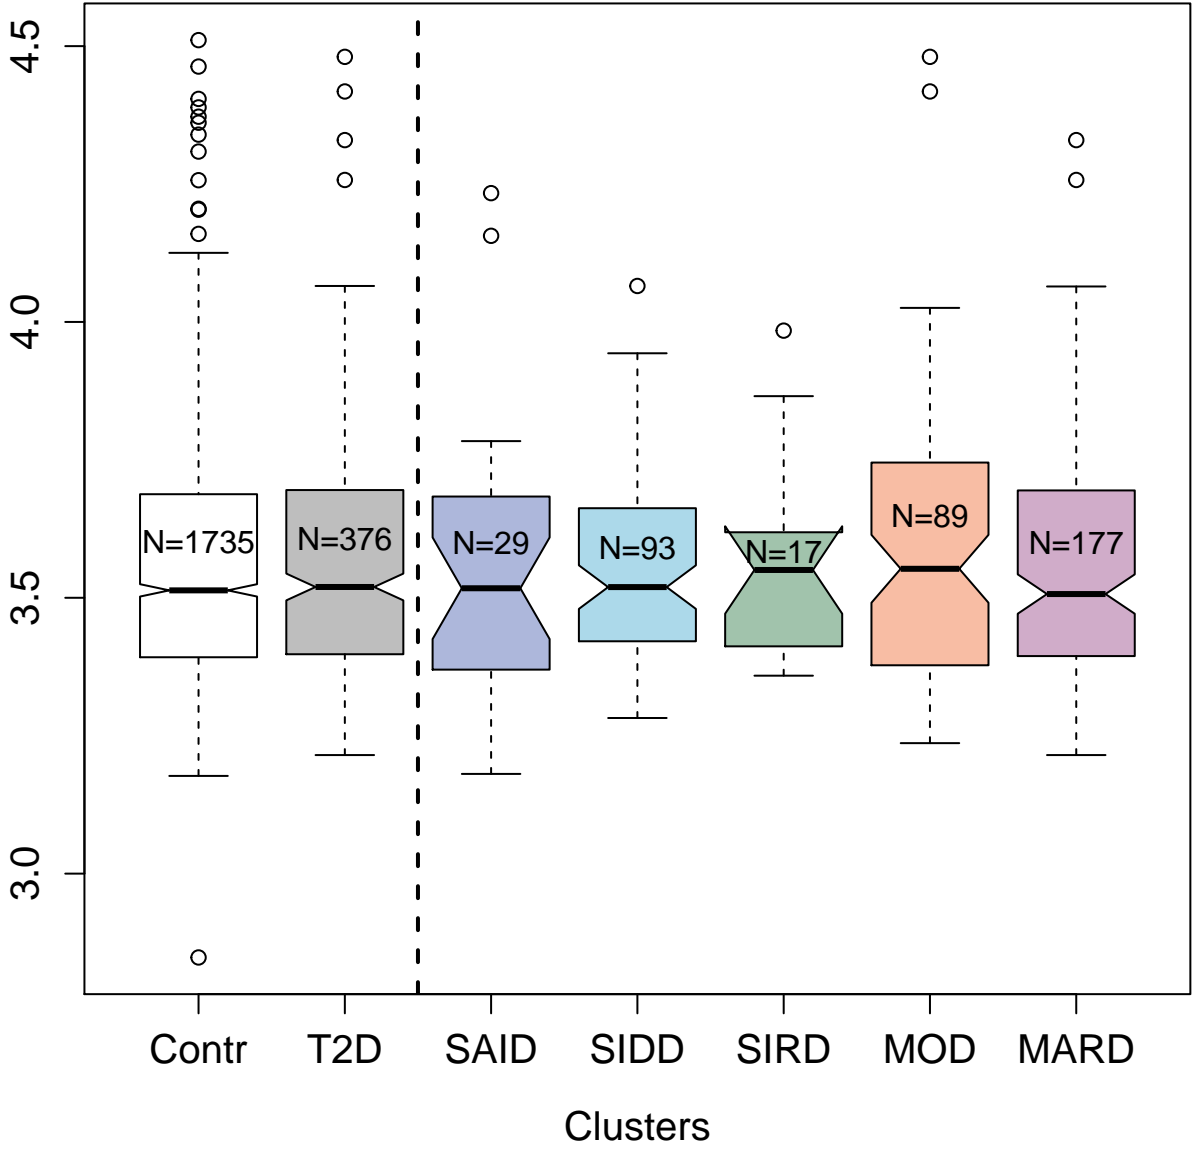

2602-2\_2 : Angiopoietin-2

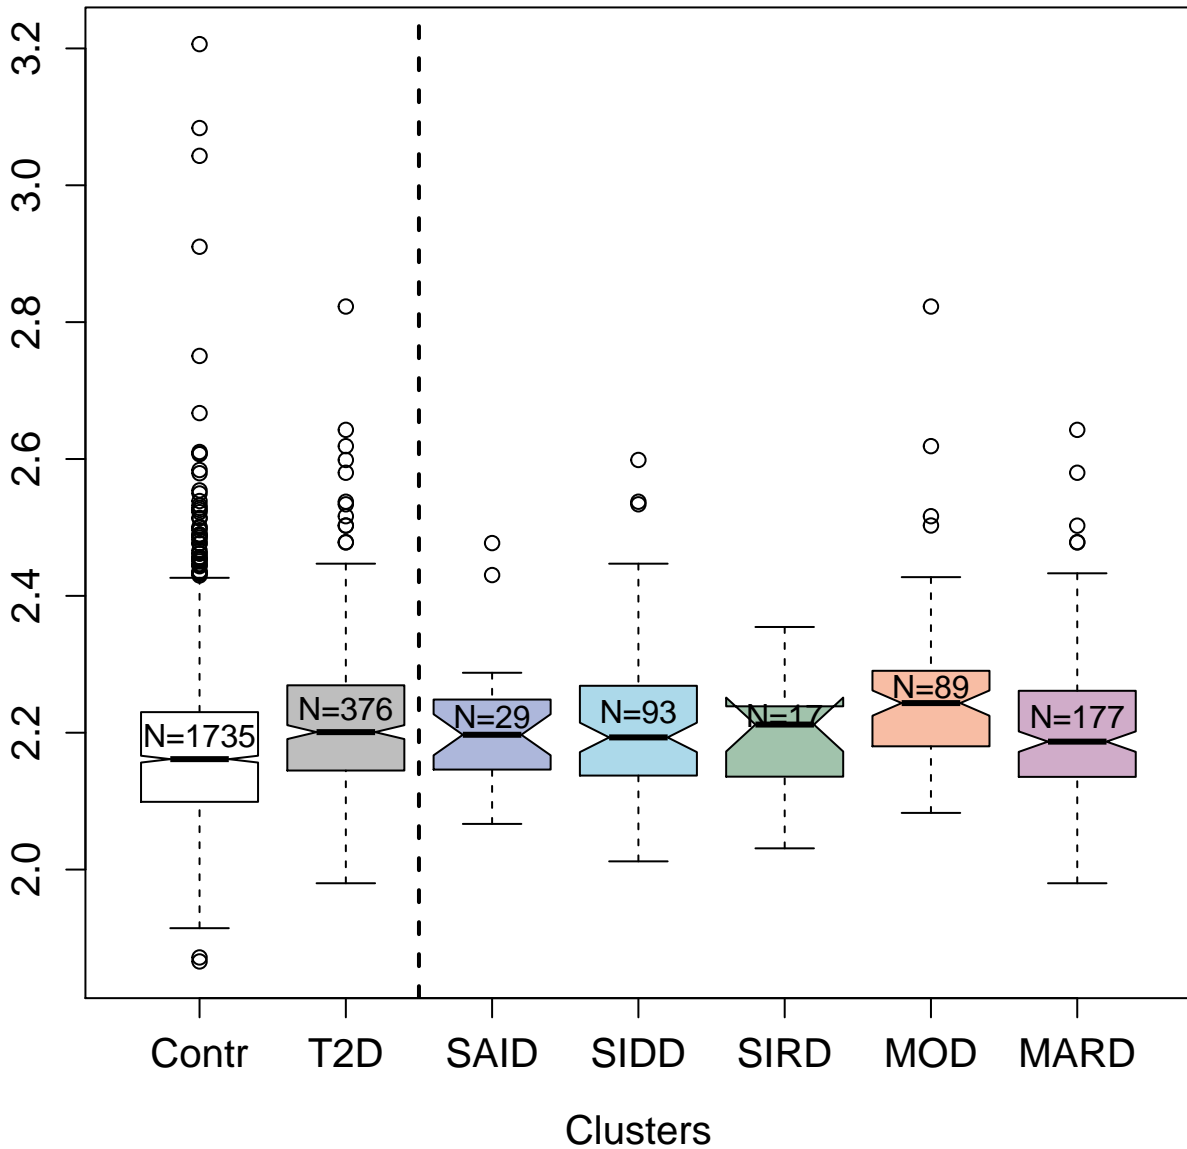



3461-58\_1 : Brevican core protein

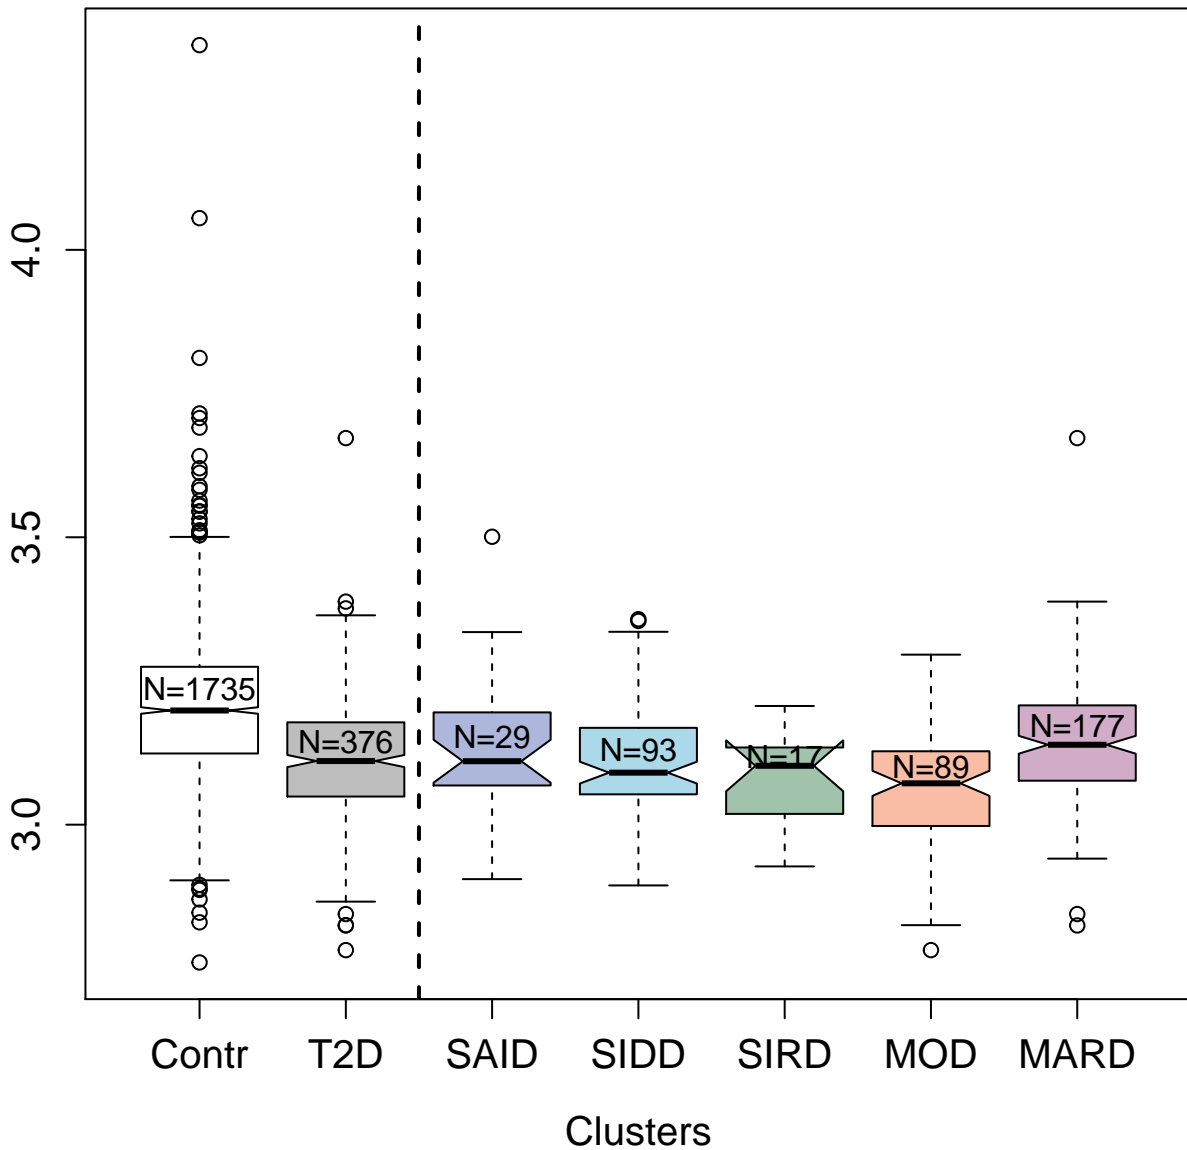



5017-19\_1 : Peroxiredoxin-5; mitochondrial

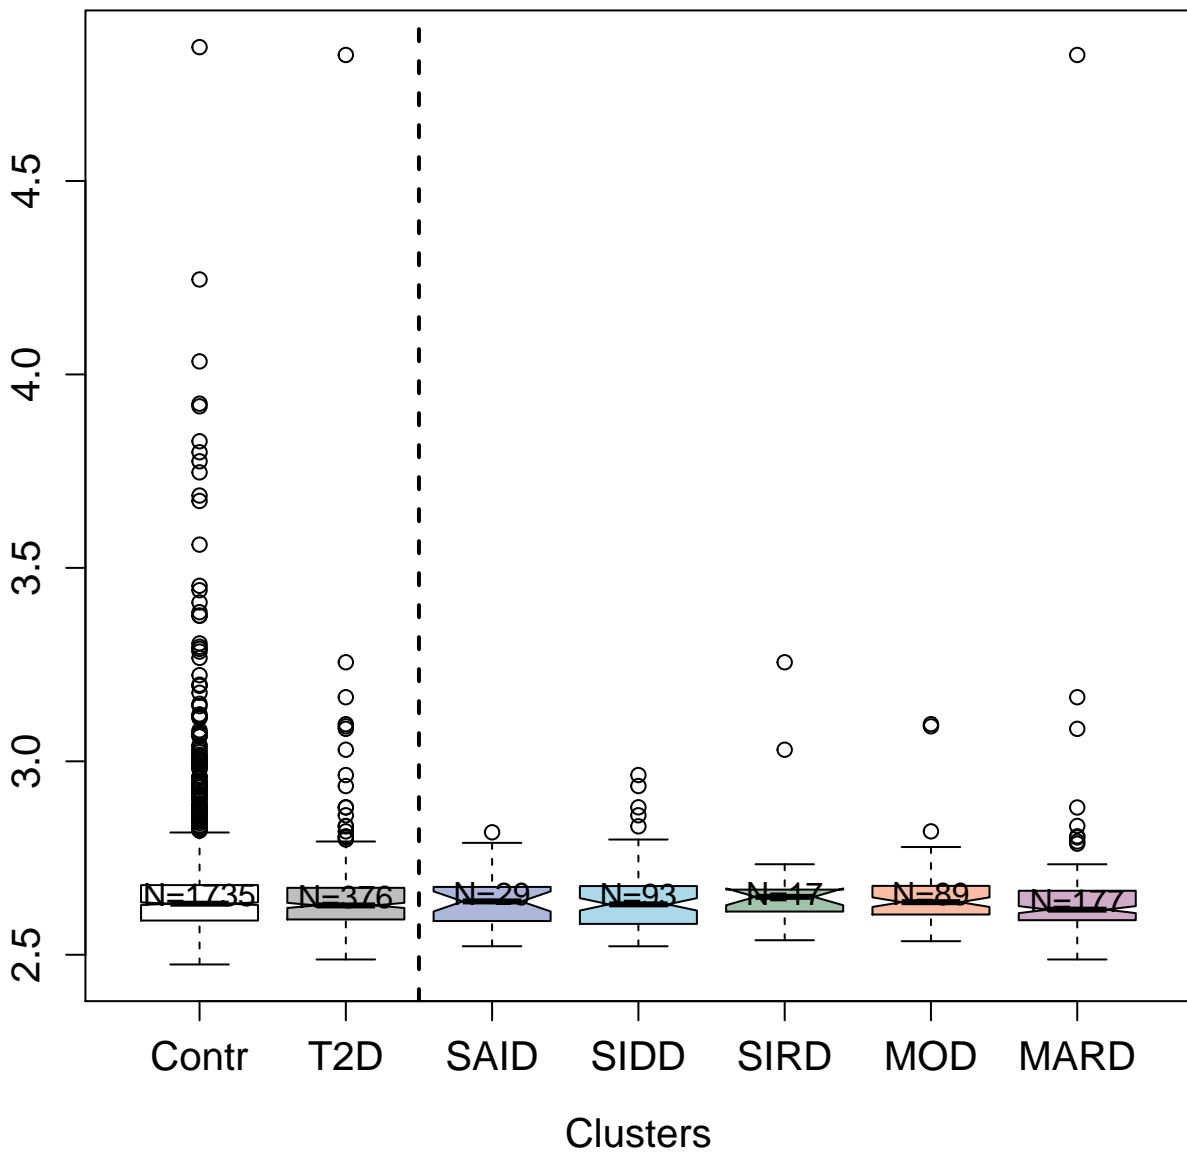

8480-29\_3 : EGF-containing fibulin-like  
extracellular matrix protein 1

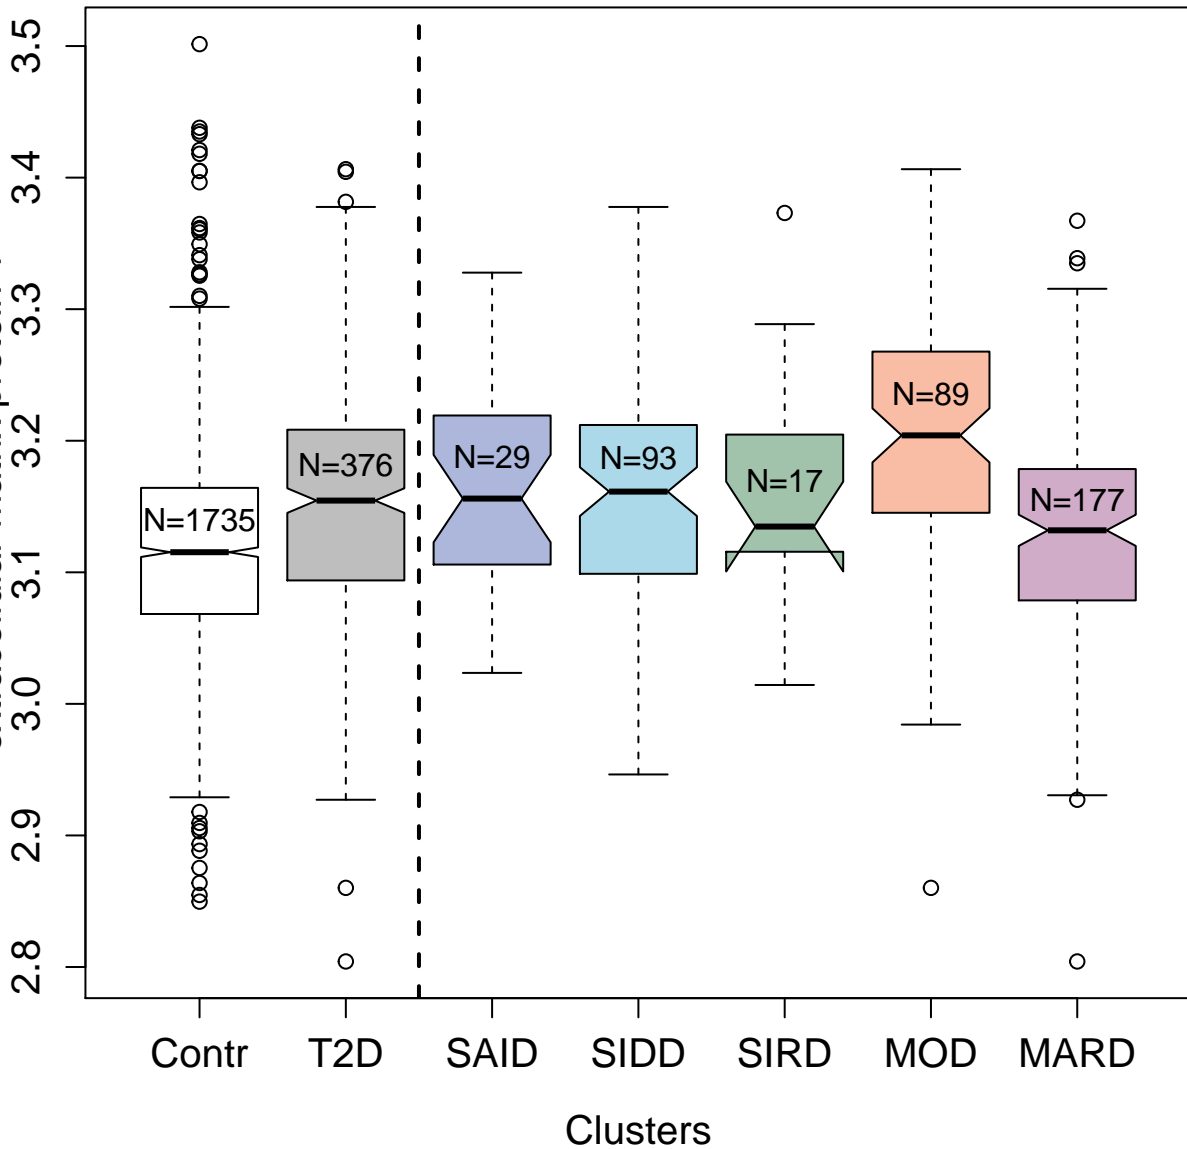

2247-20\_11 : Prokineticin-1

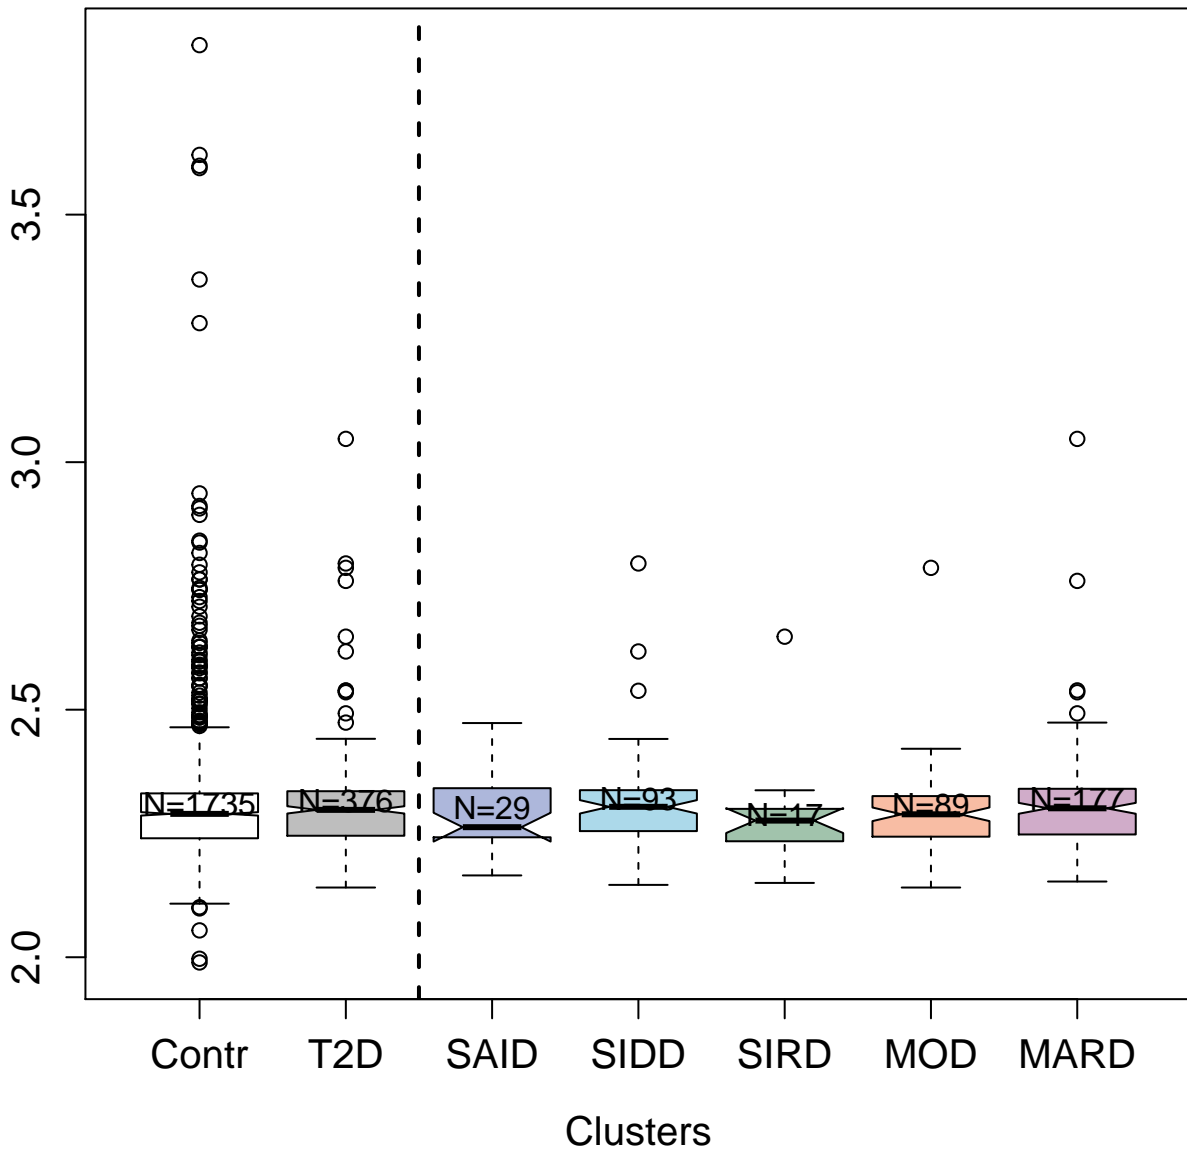

13102-1\_3 : Protein FAM3D

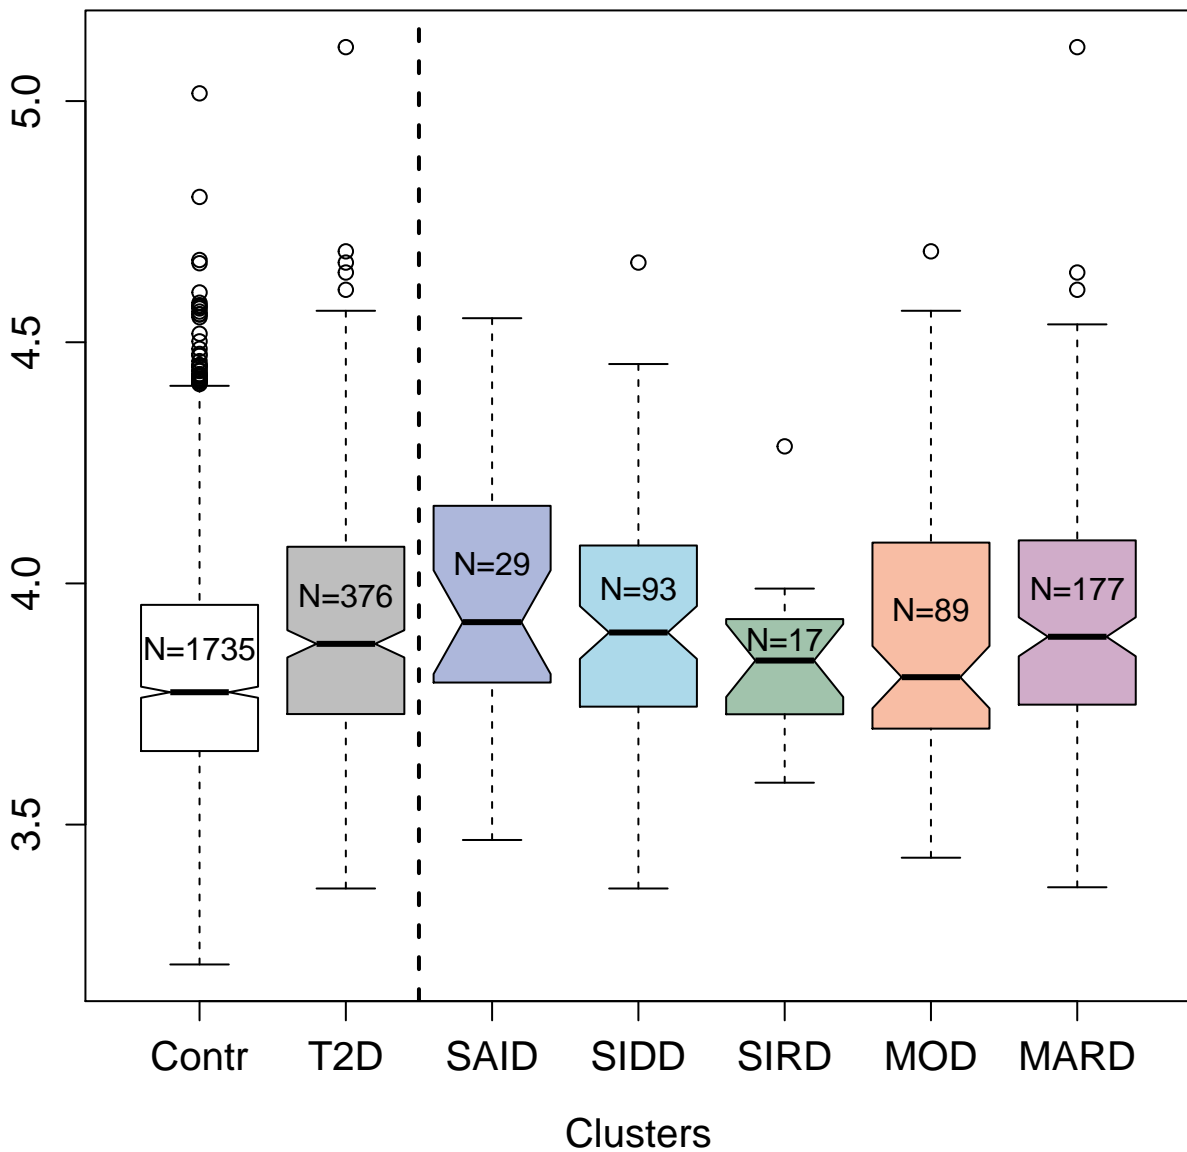

13098-93\_3 : Vascular endothelial growth factor D

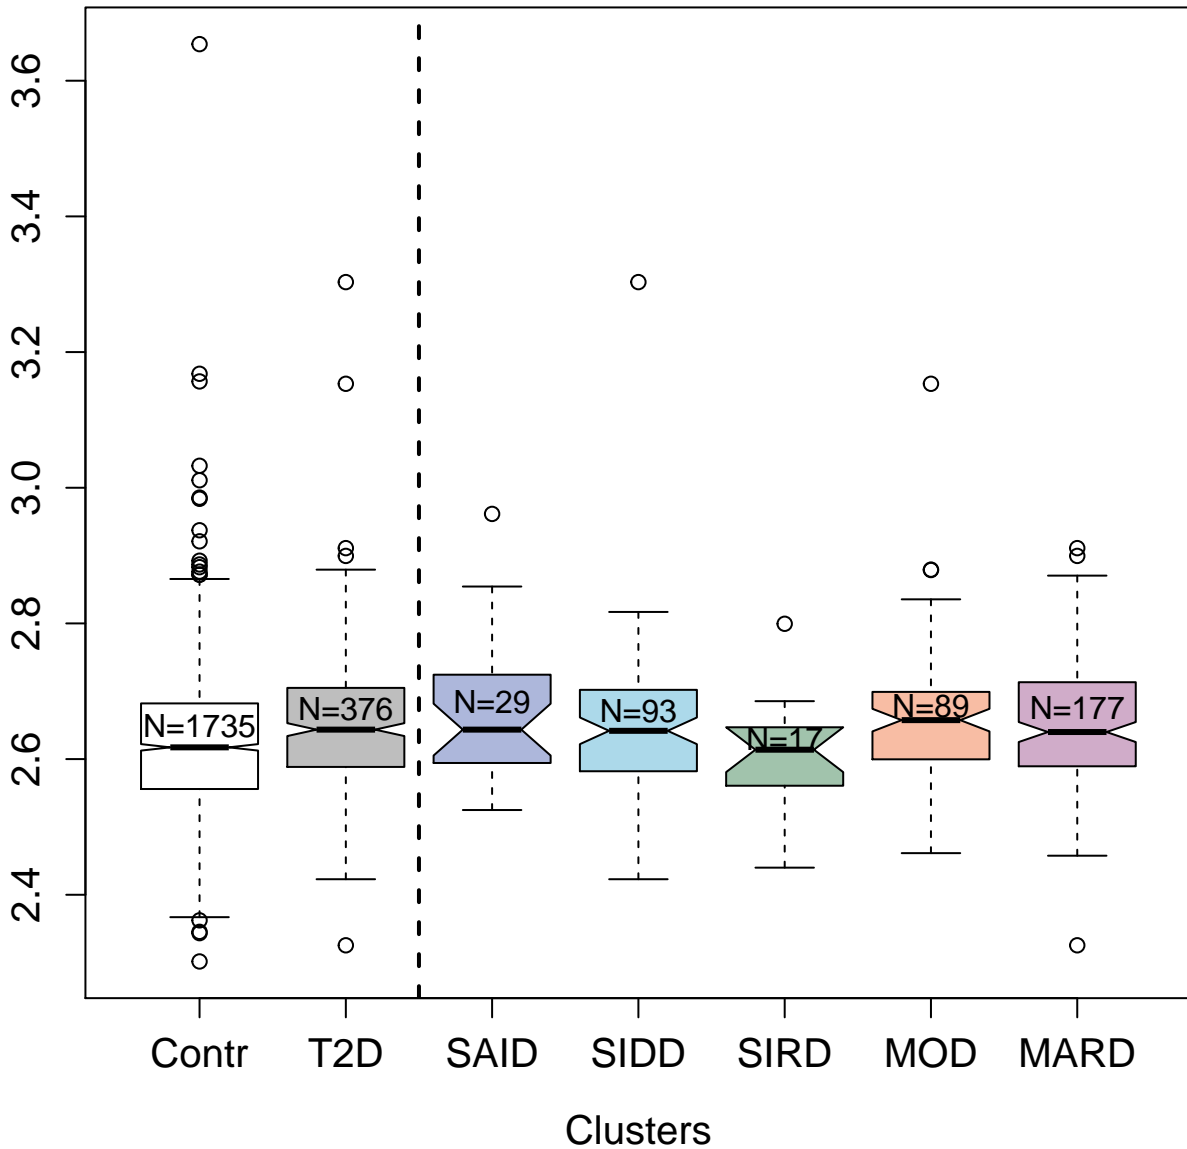

4143-74\_2 : Lymphotactin

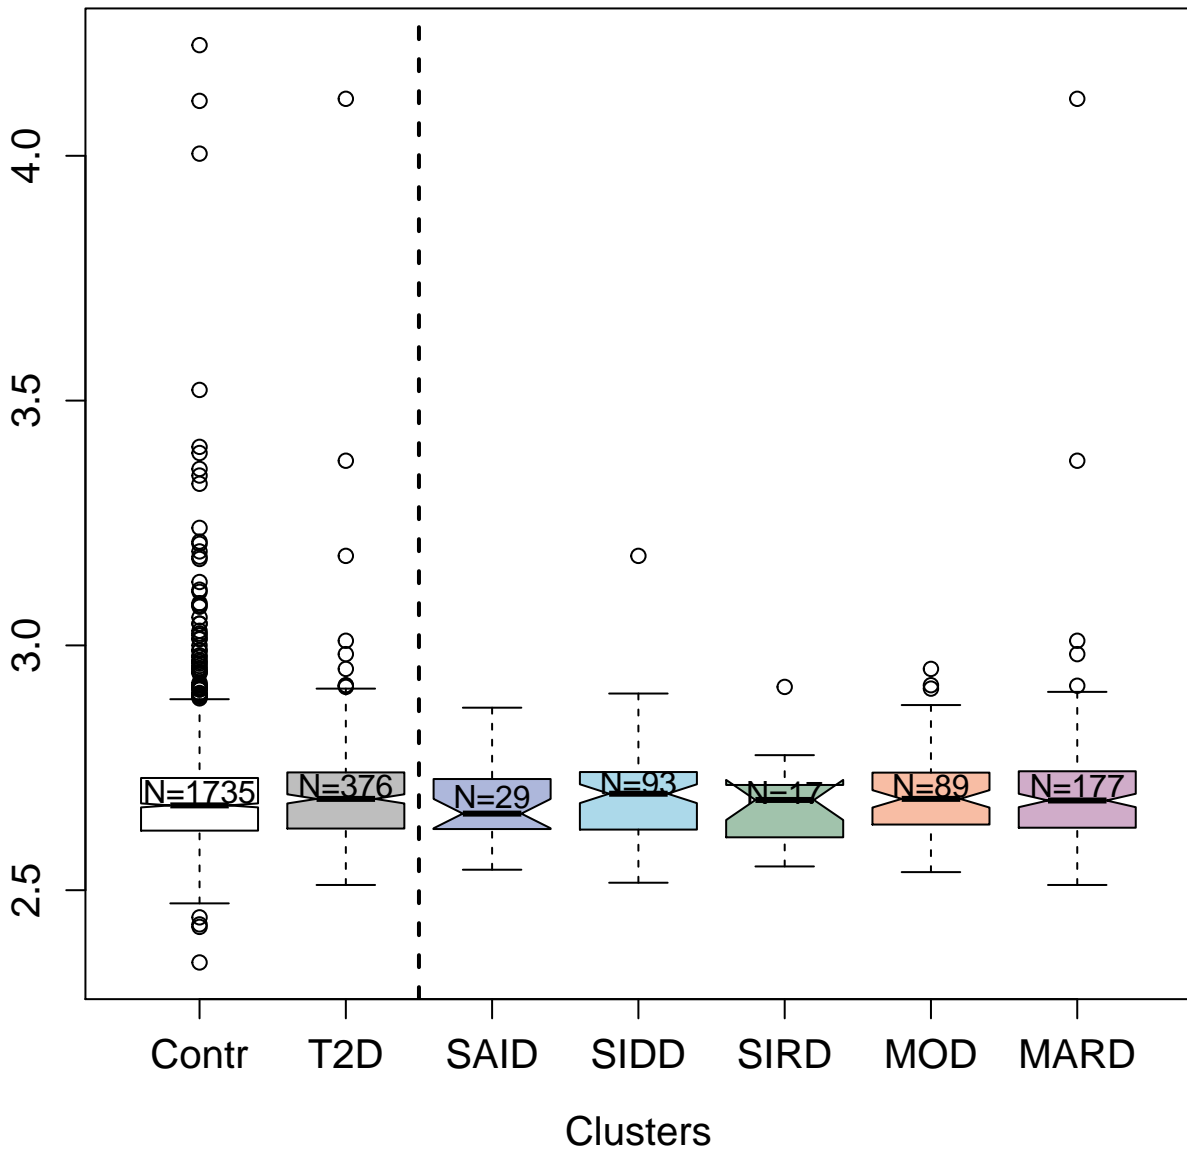



9177-6\_3 : Protein FAM3B

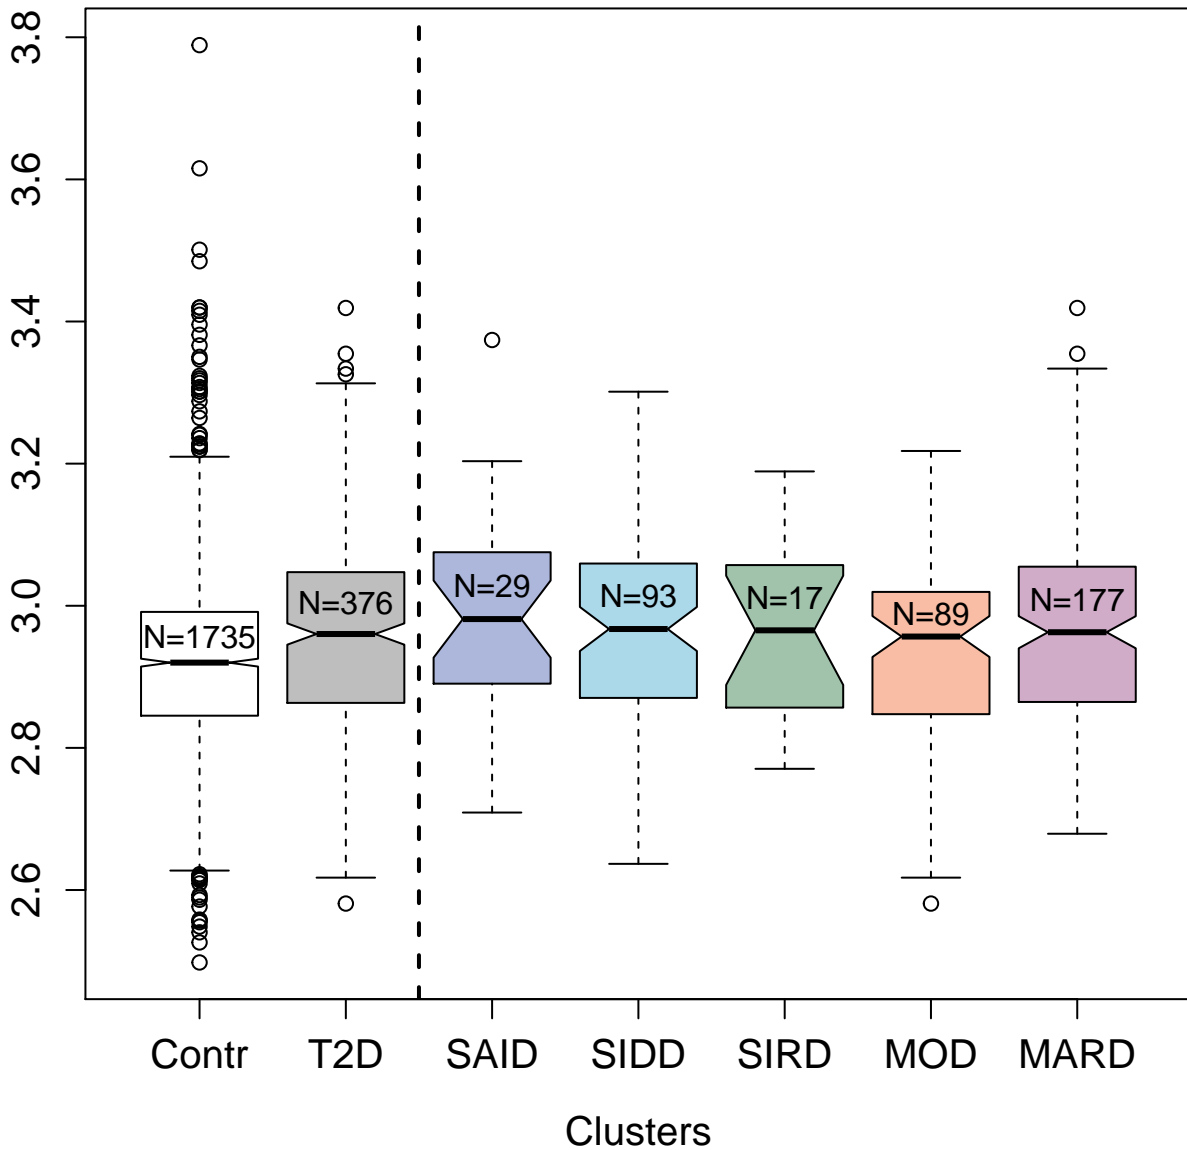

2763-66\_2 : Fibroblast growth factor 20

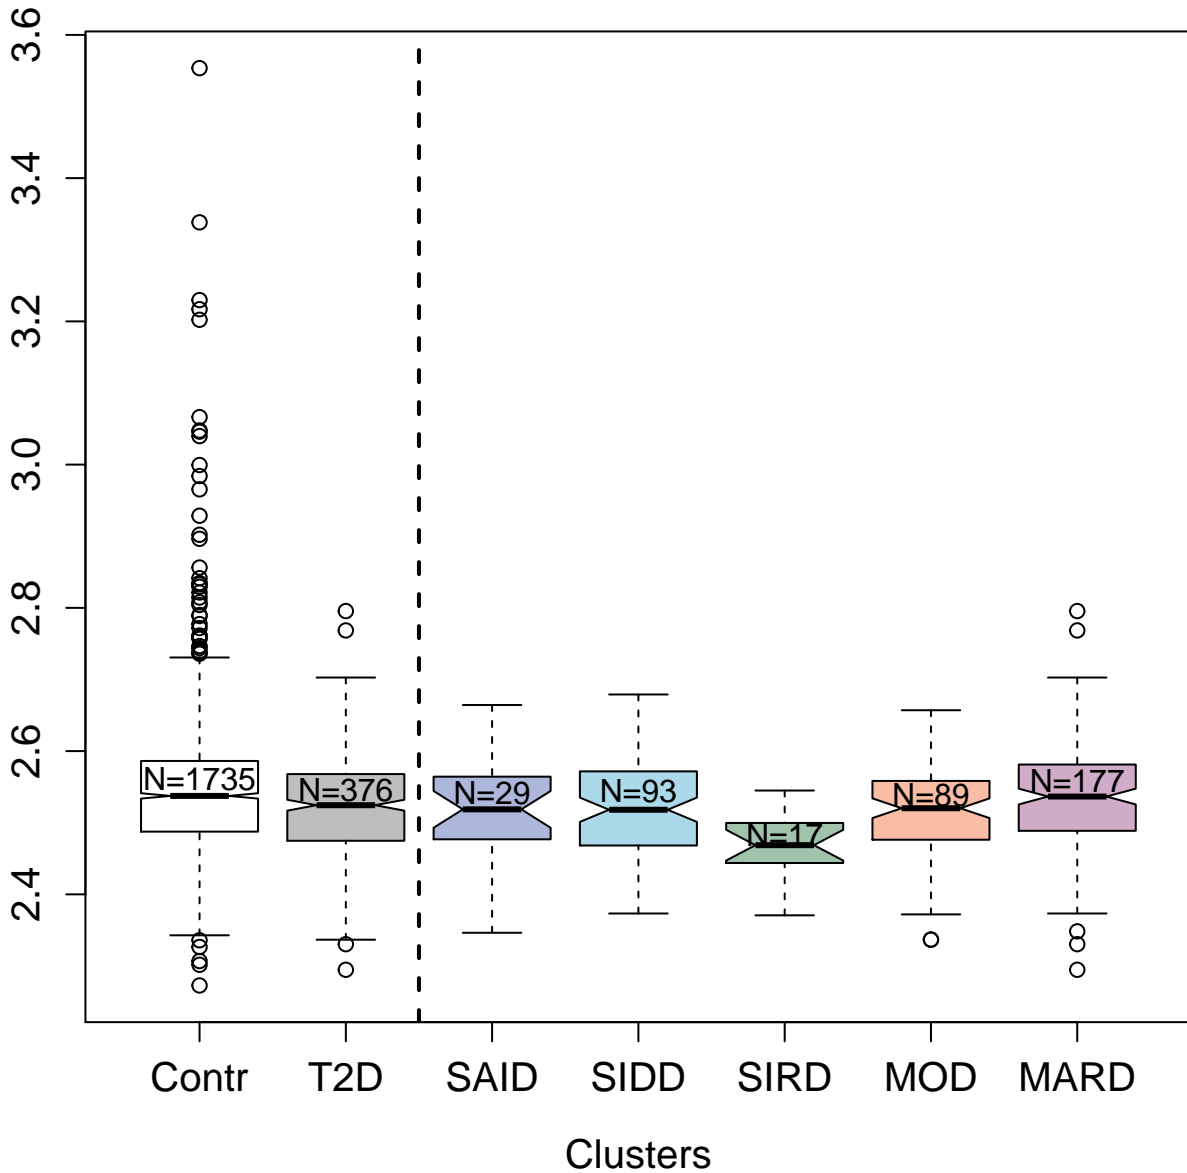

3636-37\_4 : Oxidized low-density lipoprotein receptor 1

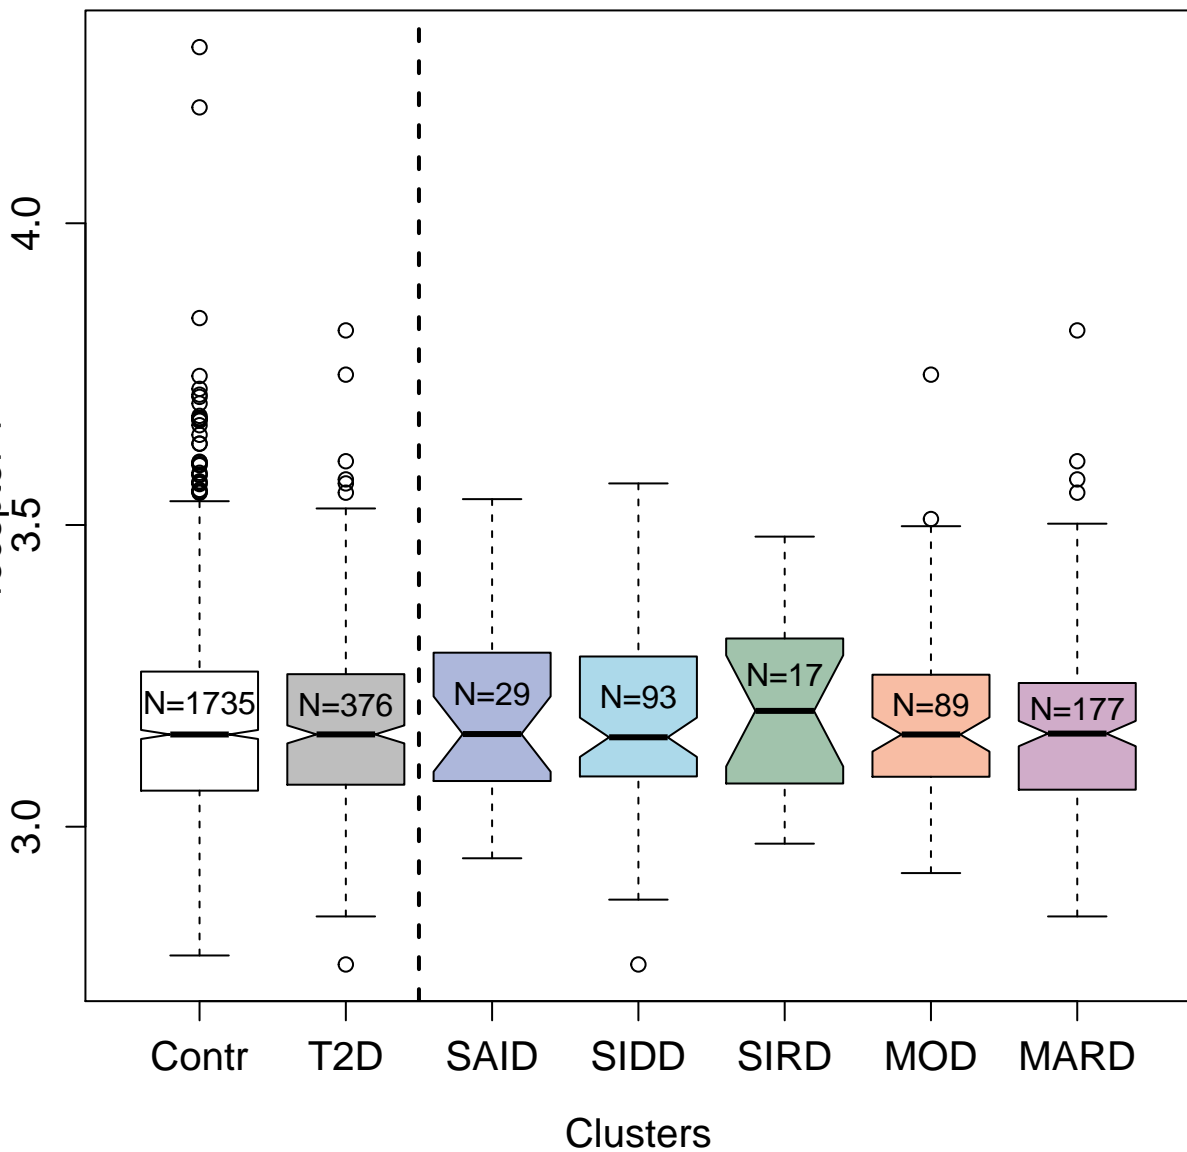

4547-59\_2 : Leucine-rich repeat transmembrane protein FLRT1

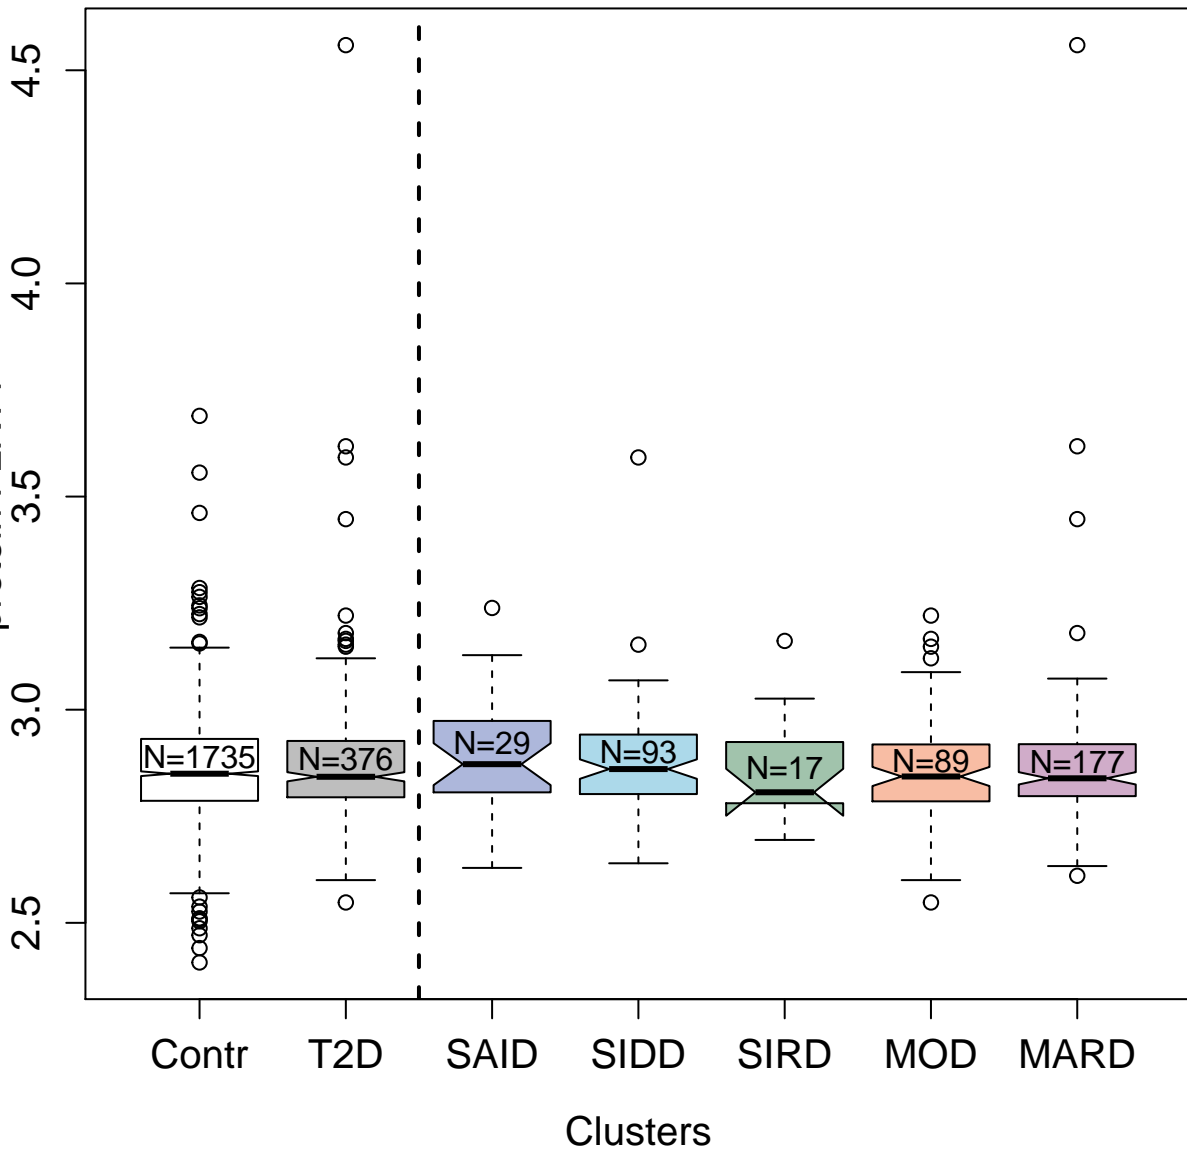

4925-54\_2 : Collagenase 3

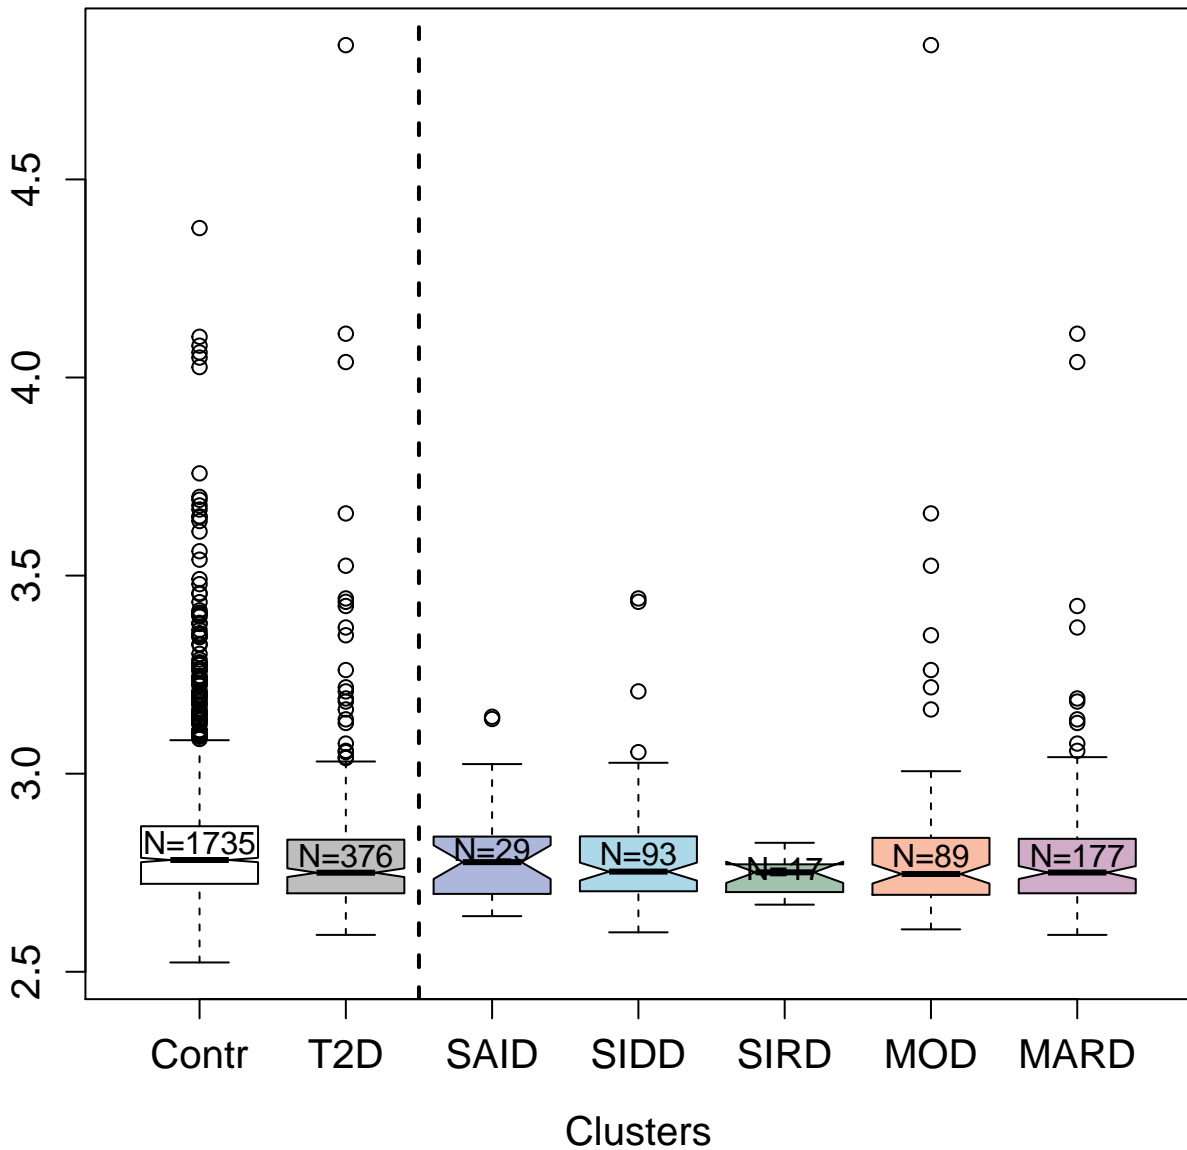

3175-51\_5 : A disintegrin and metalloproteinase  
with thrombospondin motifs 13

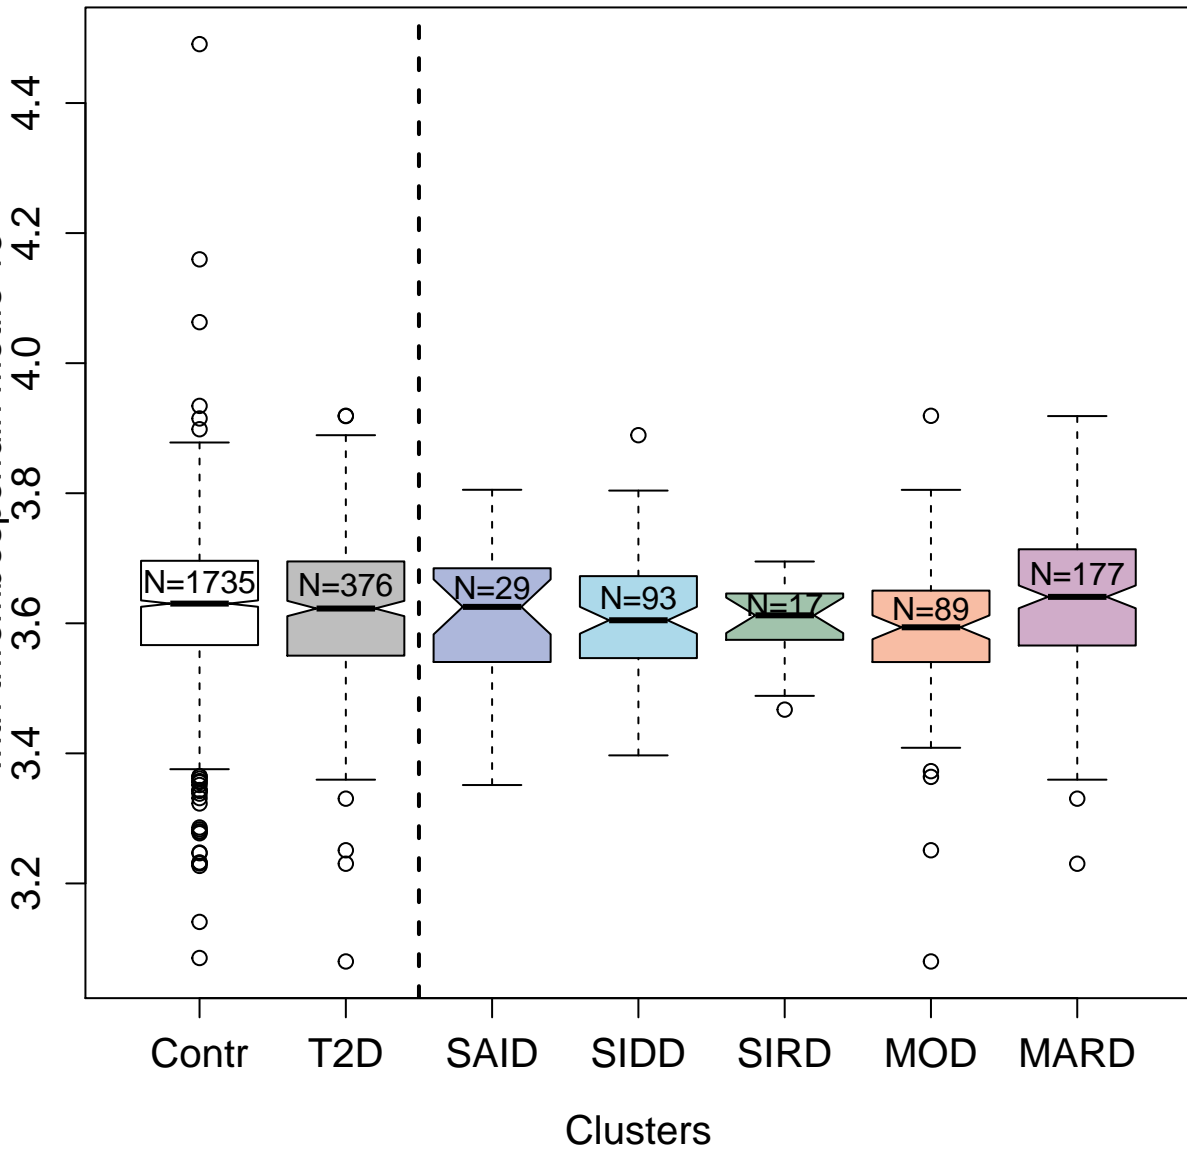

3192-3\_2 : Cytosolic non-specific dipeptidase

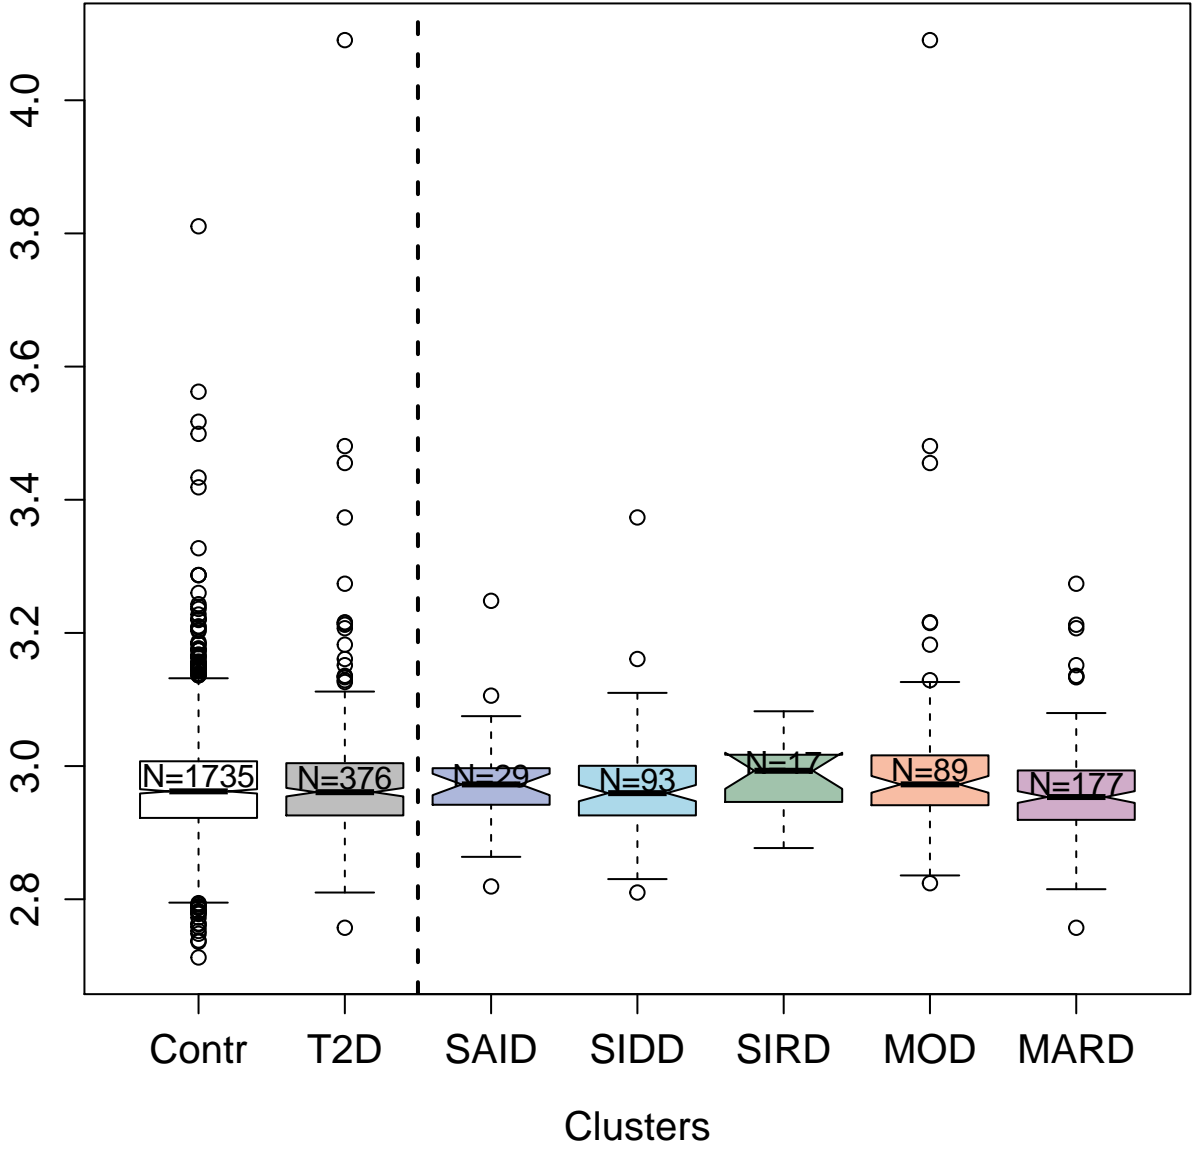

4673-13\_2 : Interleukin-6

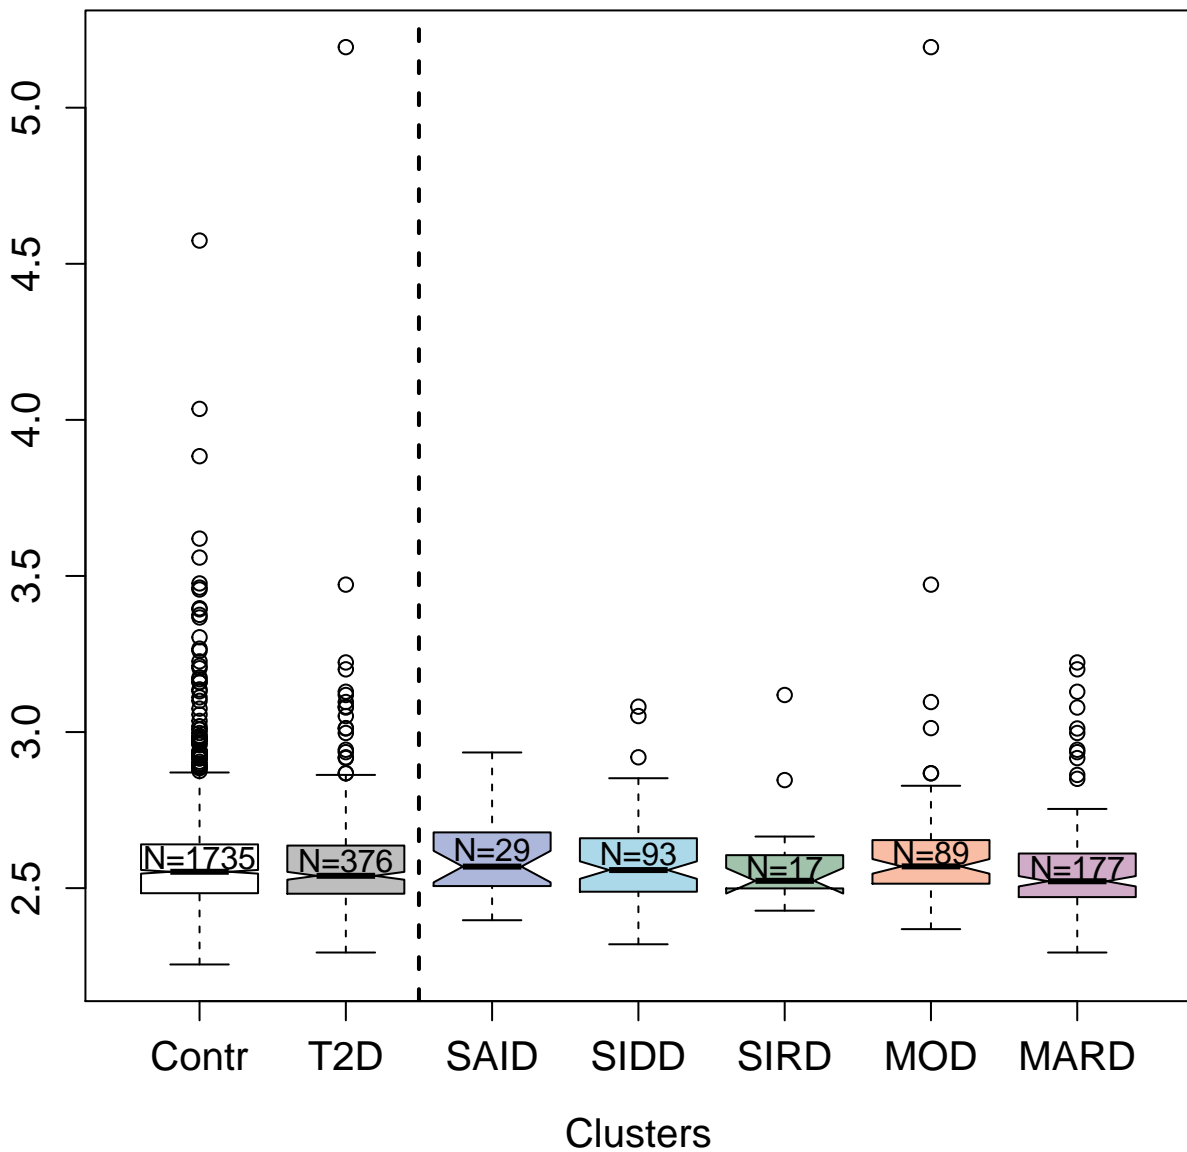



5328-33\_37 : Epidermal growth factor receptor variant III

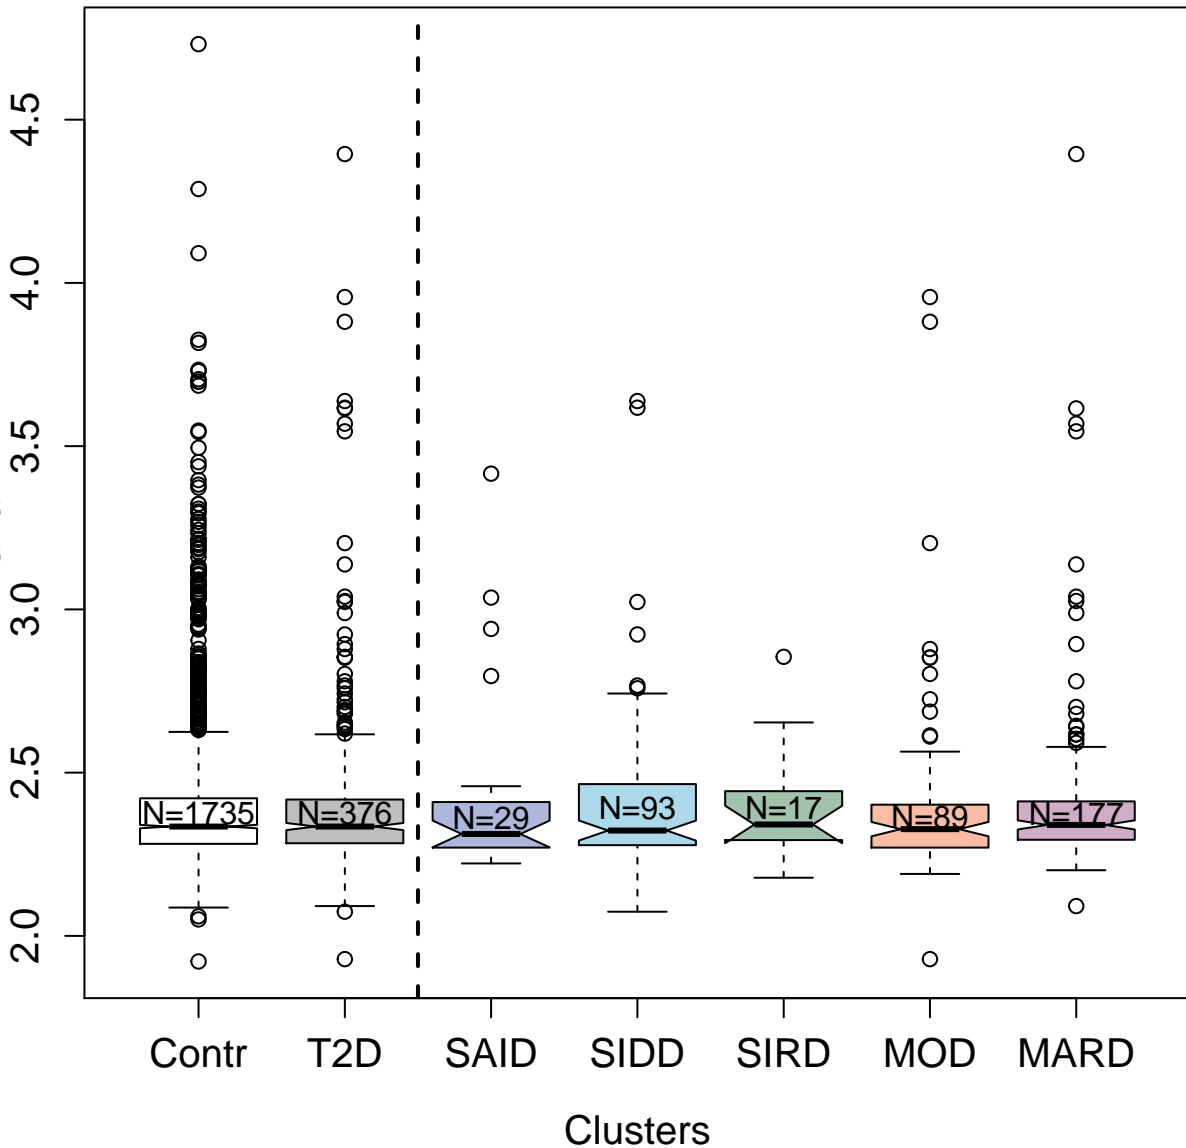

4156-74\_1 : Transforming growth factor beta-2

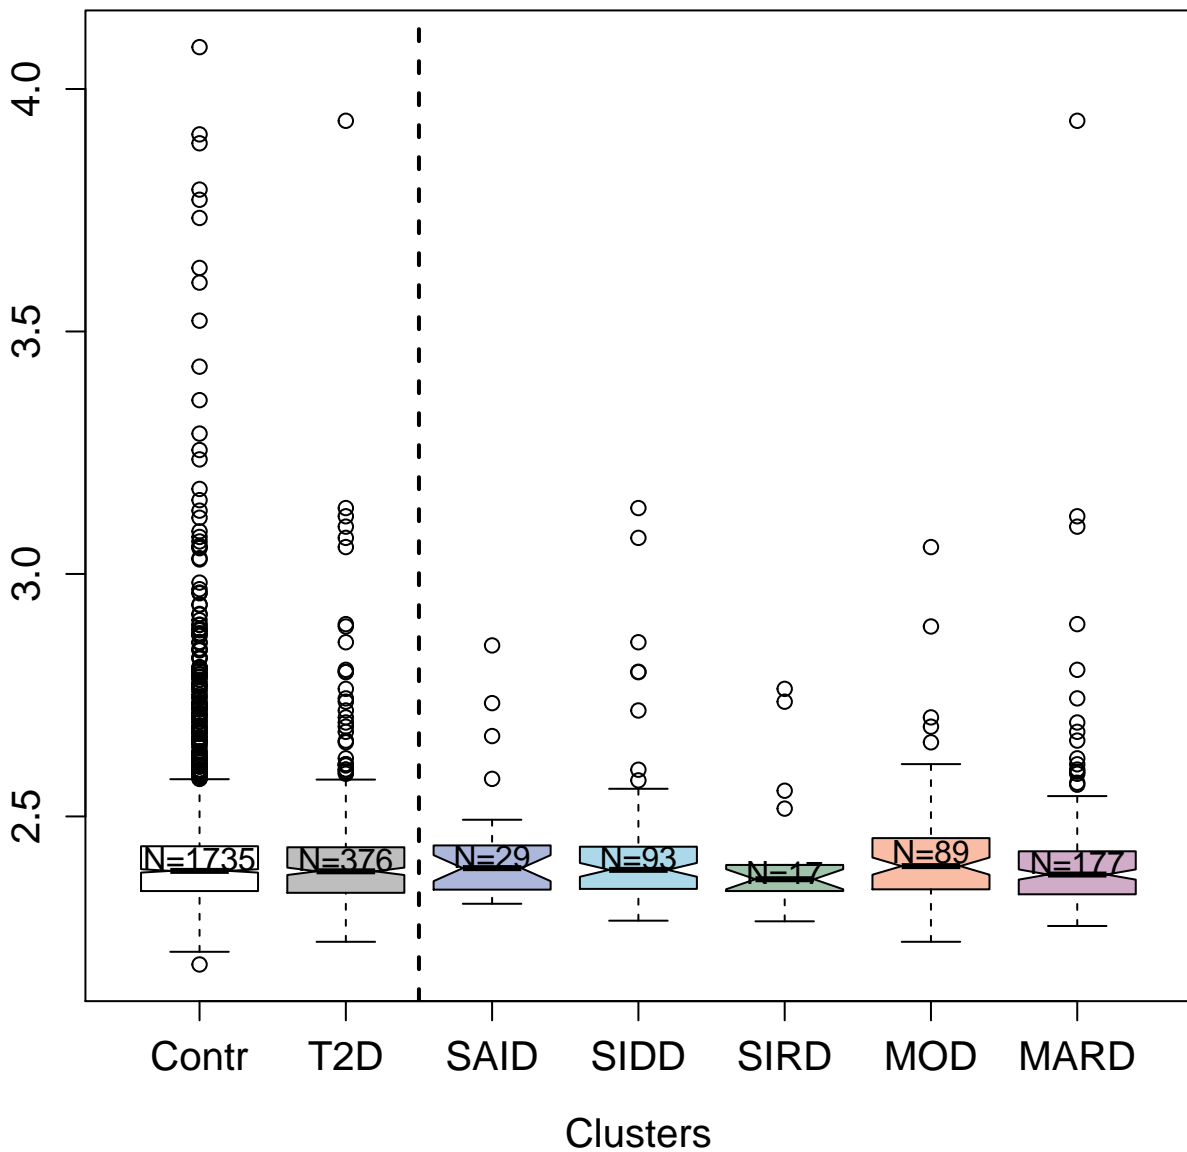

3889-64\_2 : Lamin-B1

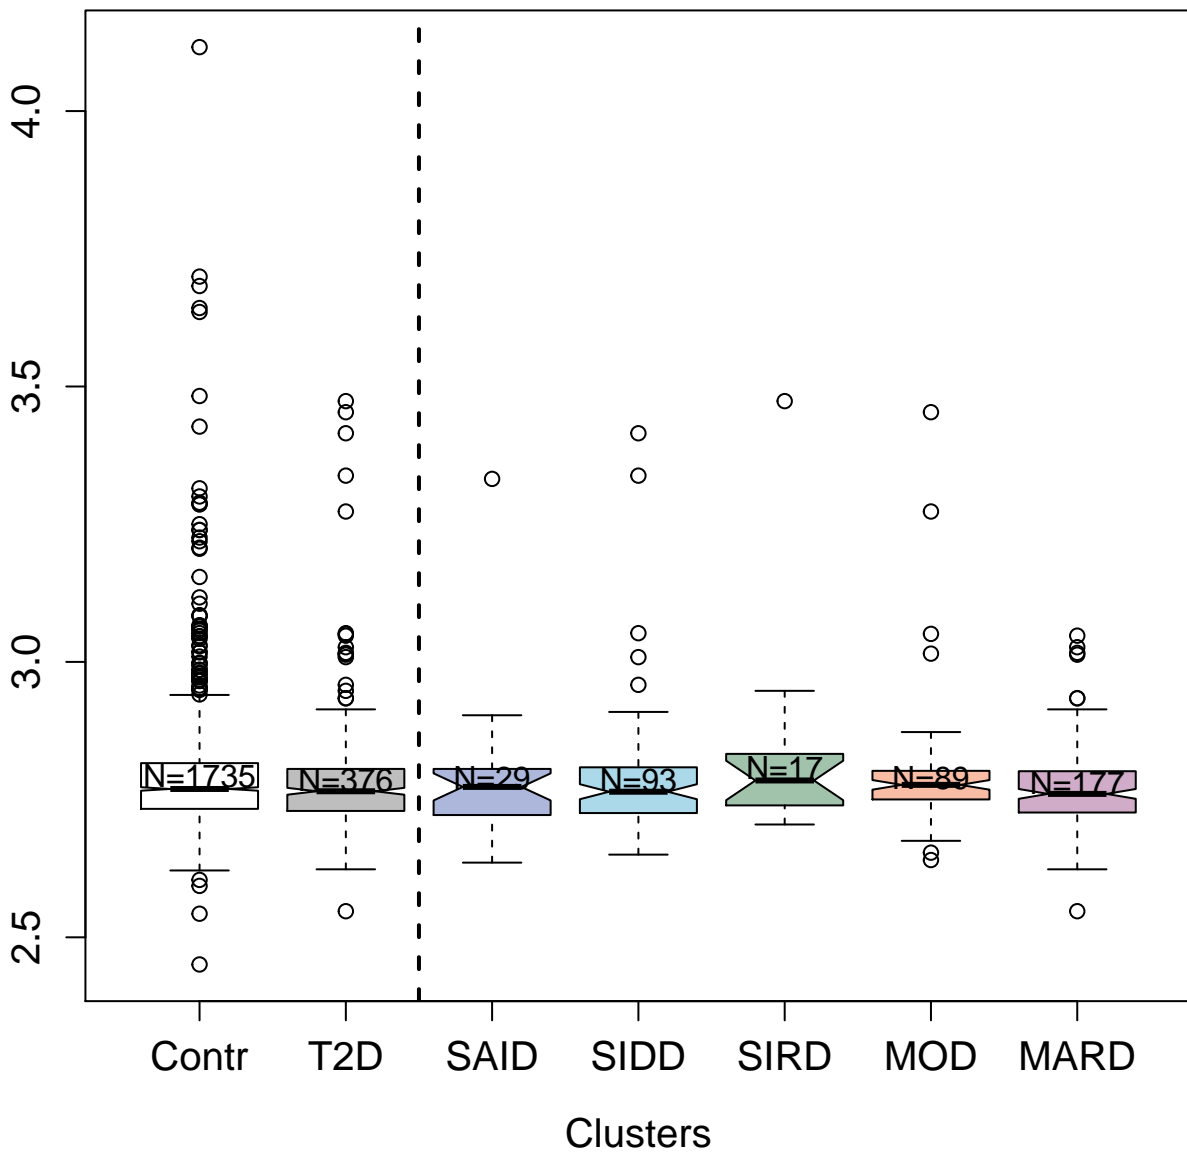

3594-6\_5 : Cathepsin E

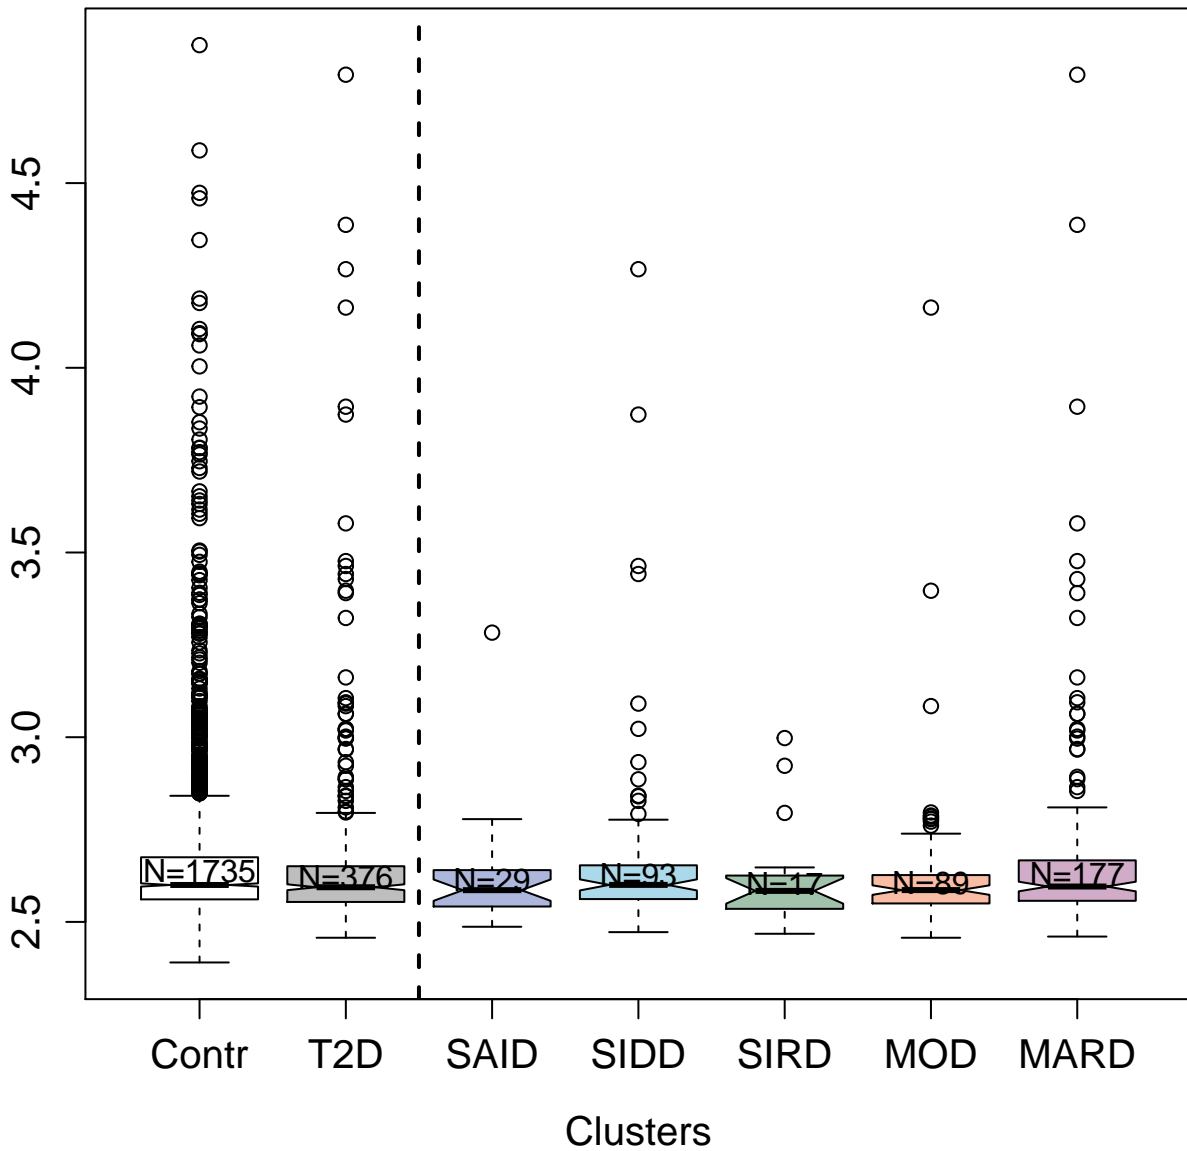

5089-11\_3 : Interleukin-7 receptor subunit alpha

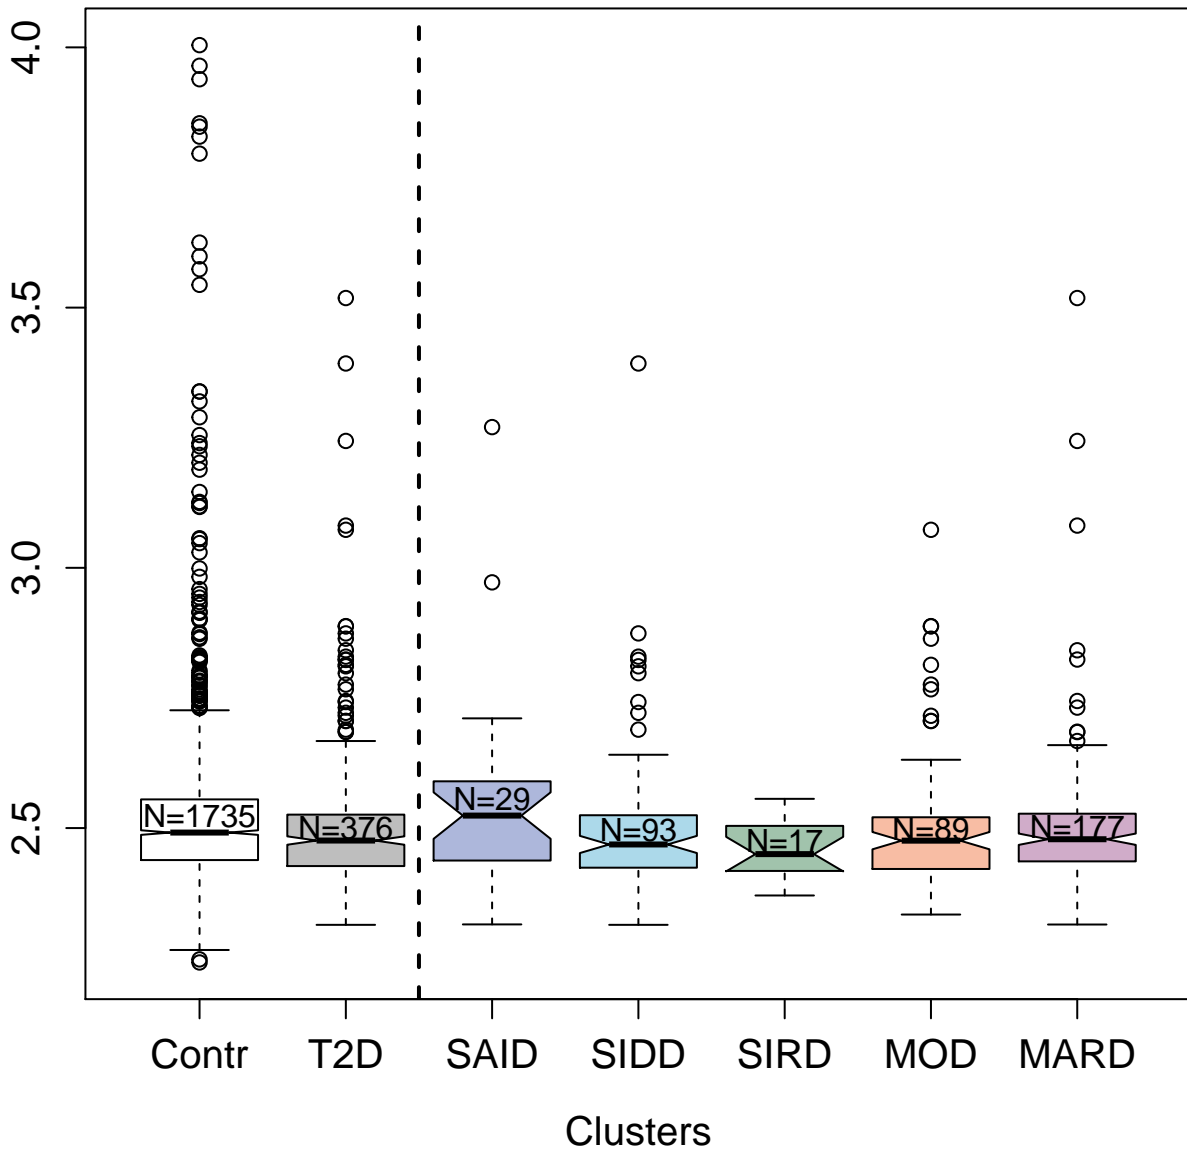



4909-68\_1 : Galectin-8

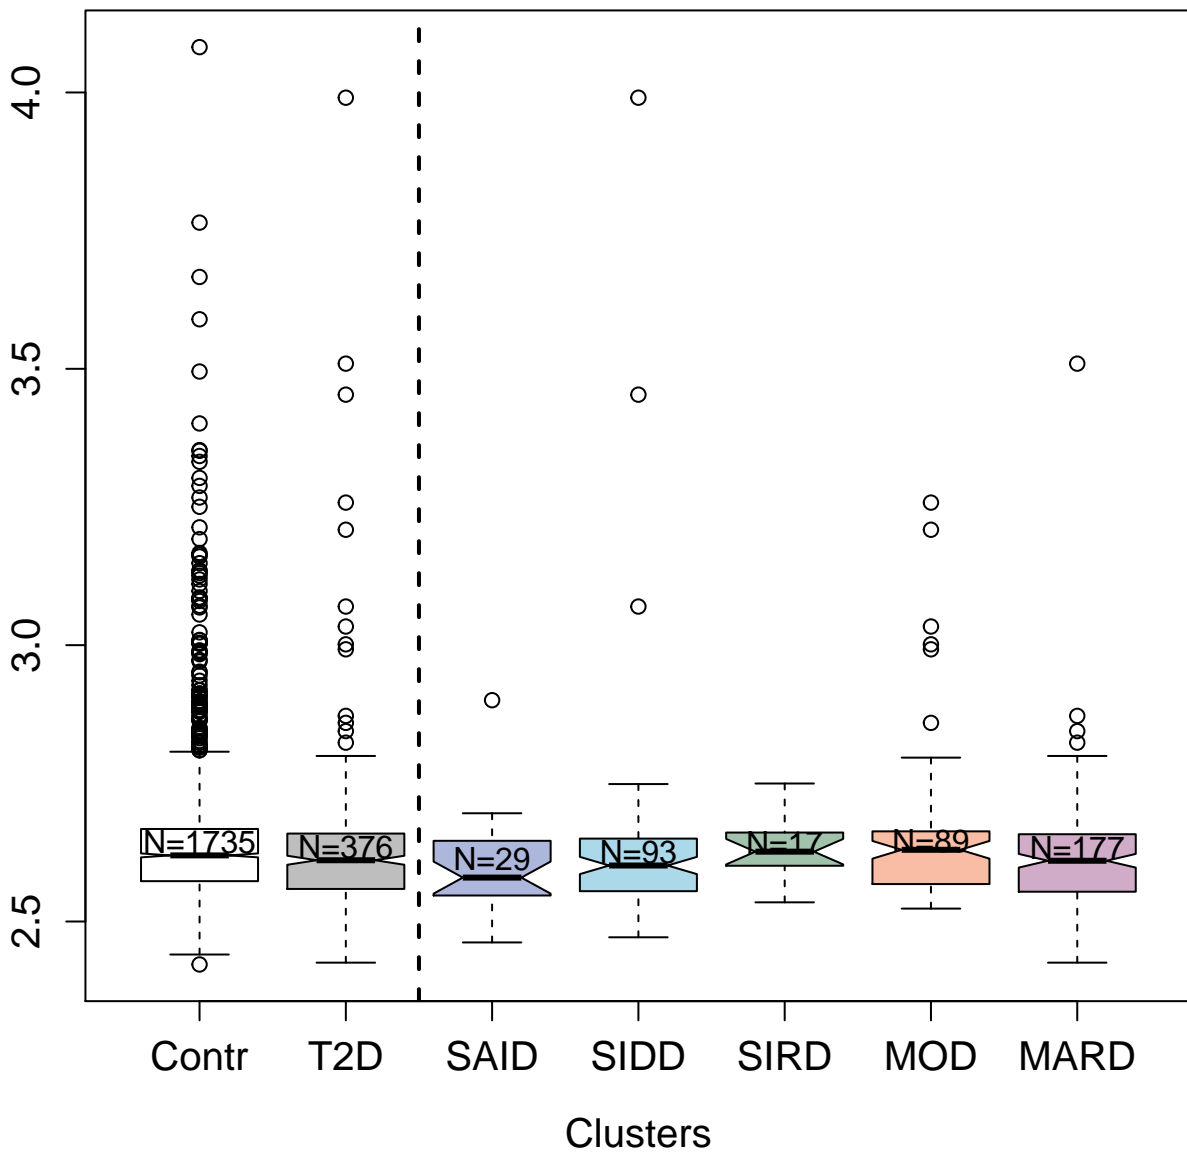

4986-59\_1 : Focal adhesion kinase 1

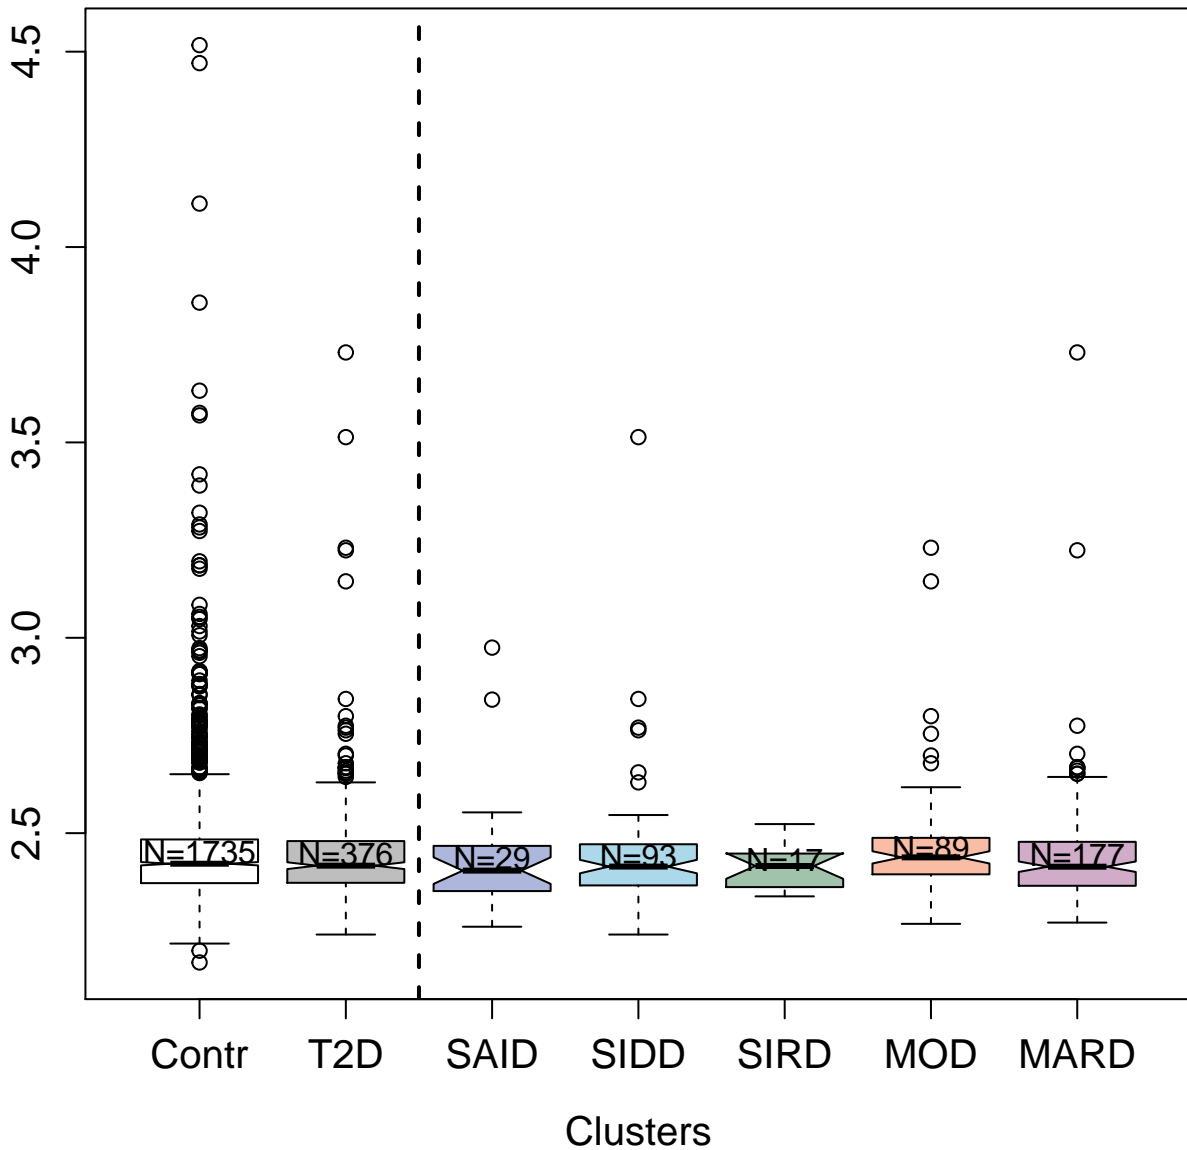



3808-76\_2 : Fibroblast growth factor receptor 2

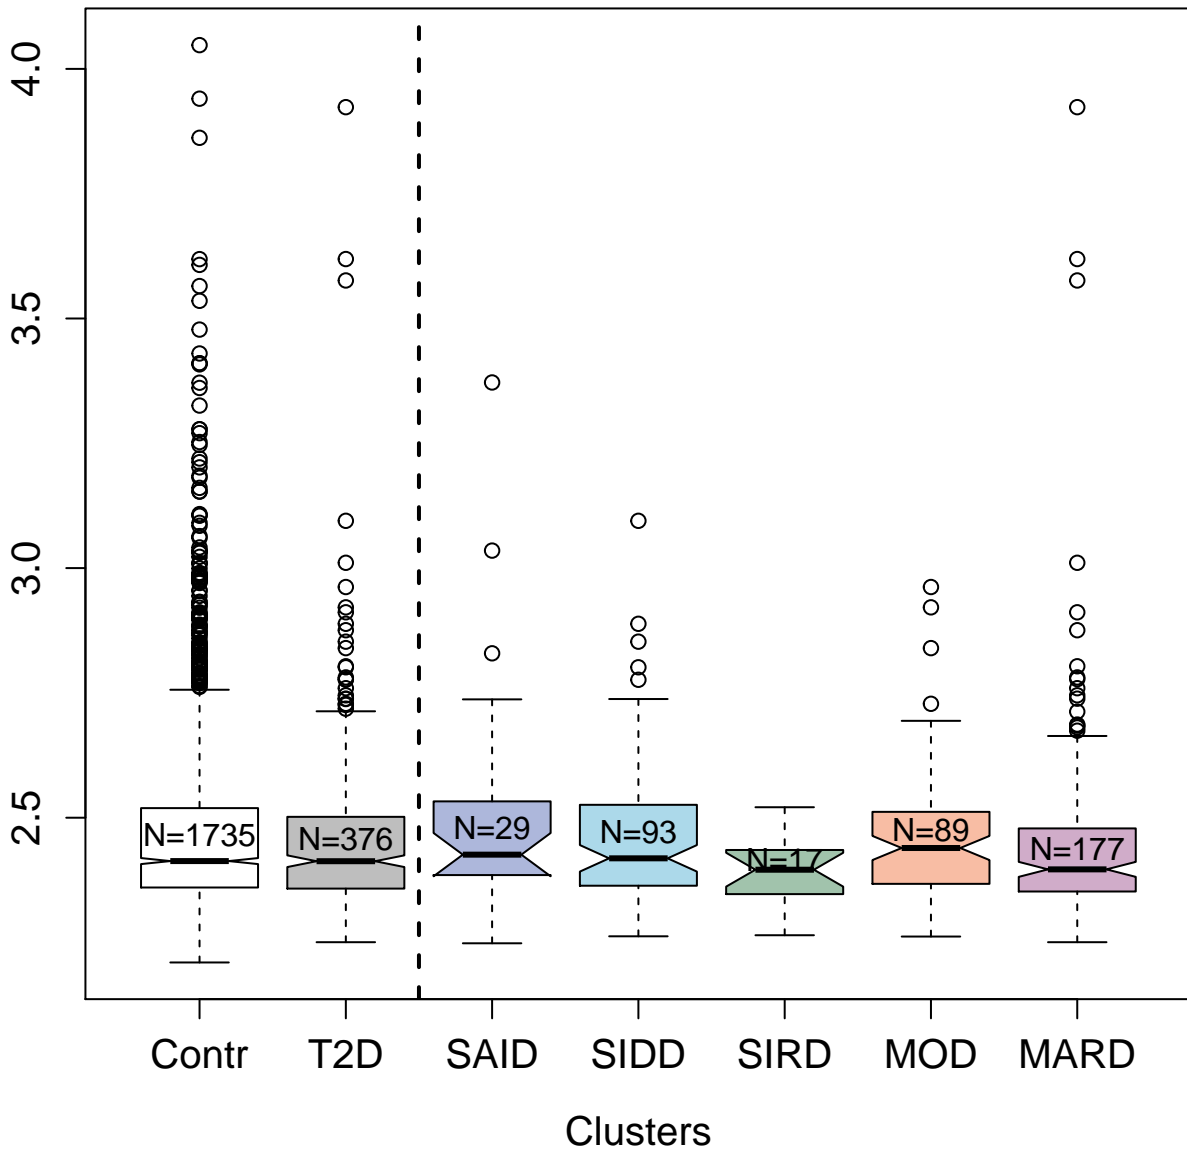

2011-27\_2 : Midkine

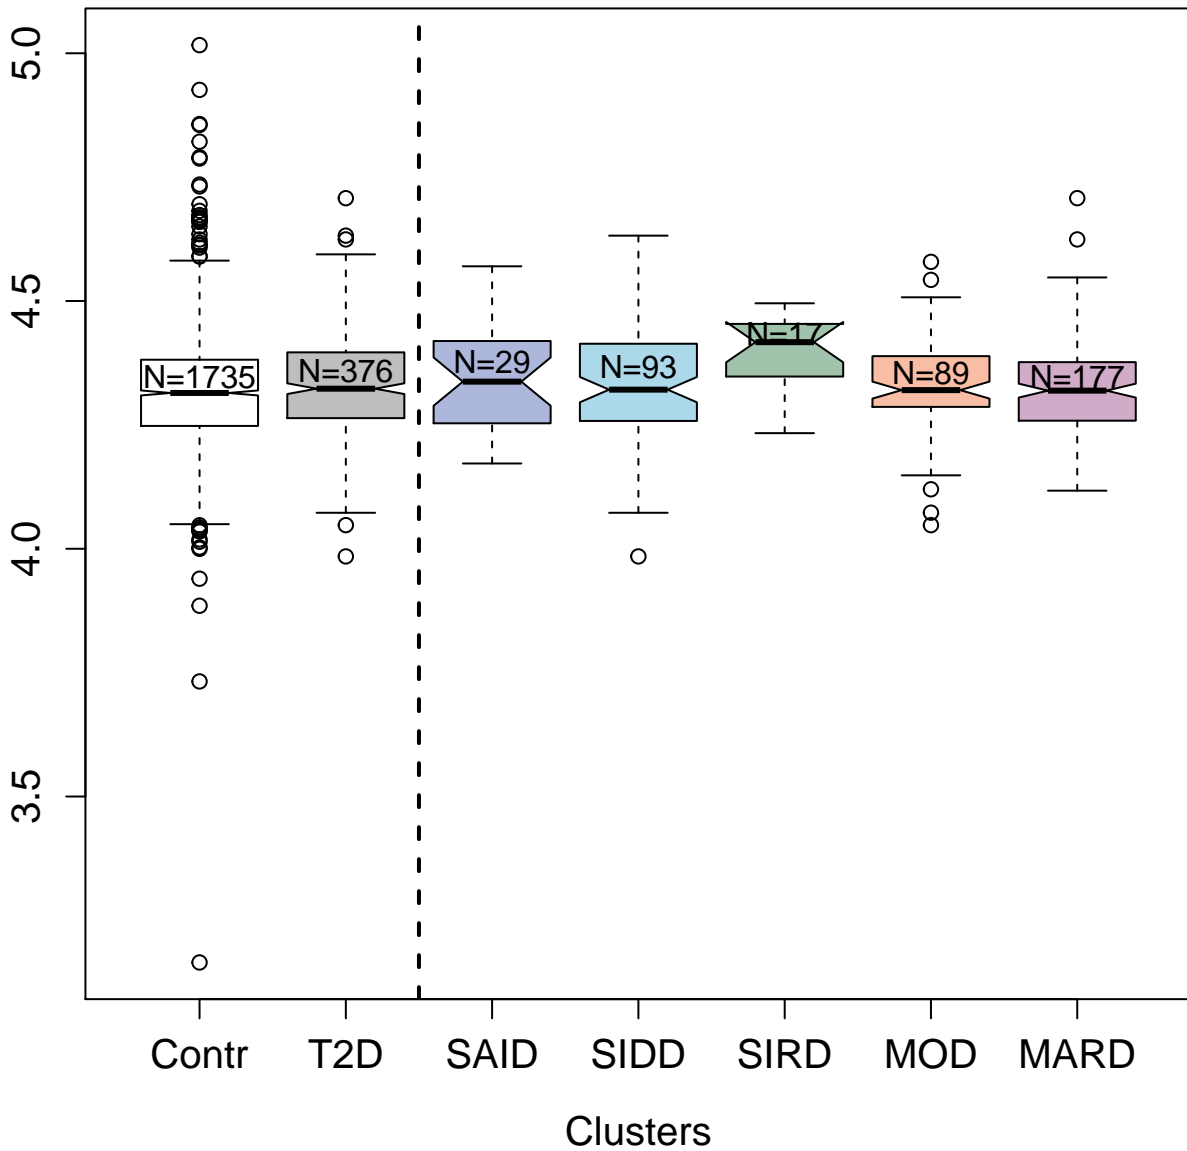

4906-35\_1 : Coagulation Factor V

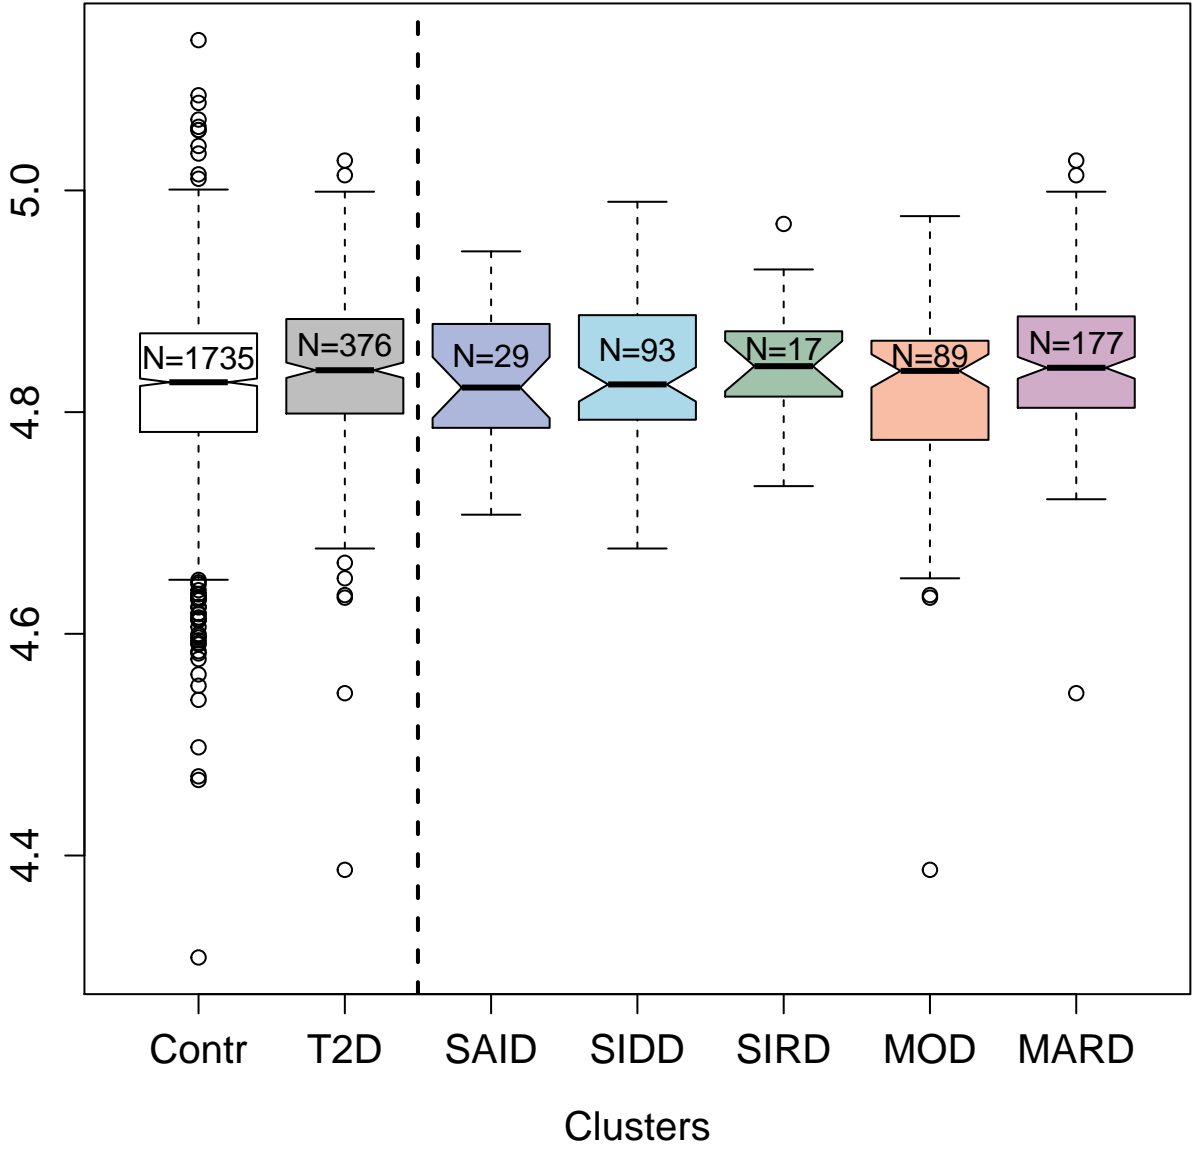

3413-50\_2 : Bcl-2-related protein A1

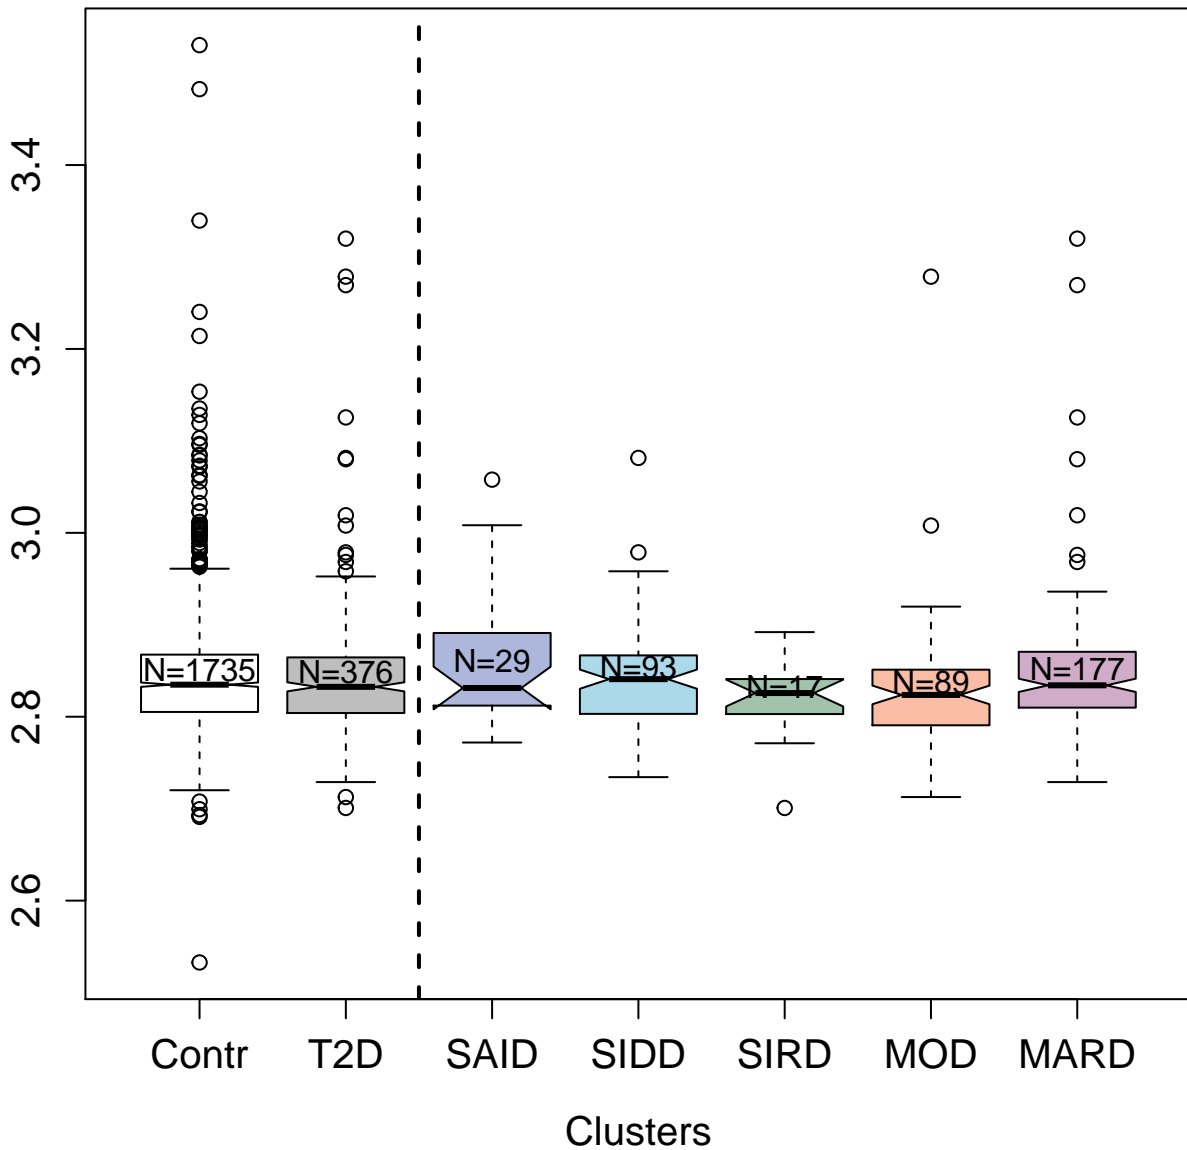

8479-4\_3 : Stromelysin-2

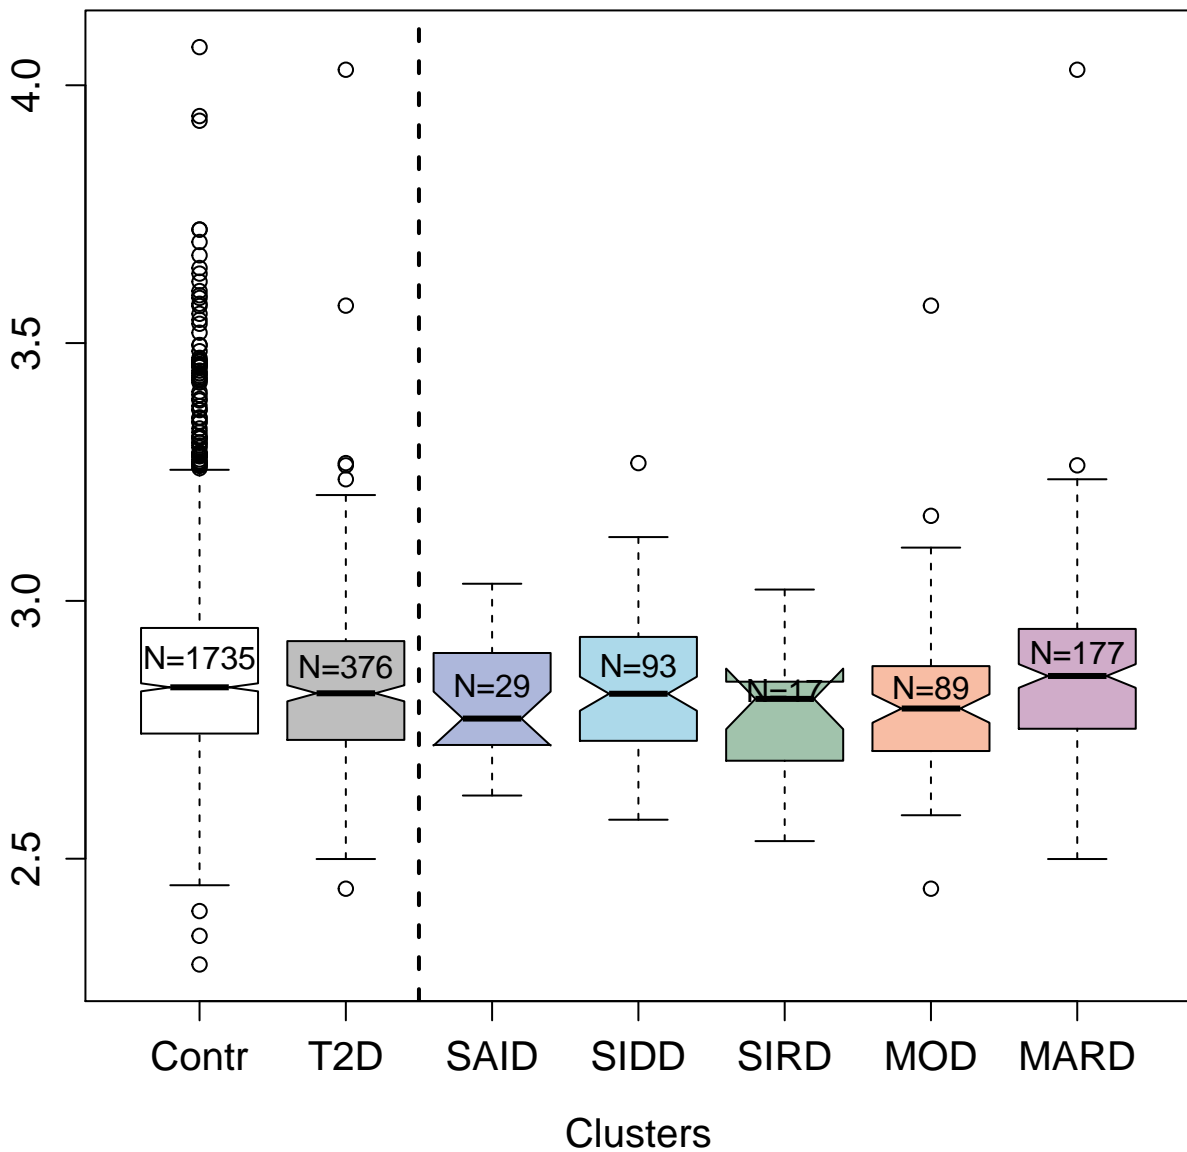

3060-43\_2 : Complement component C9

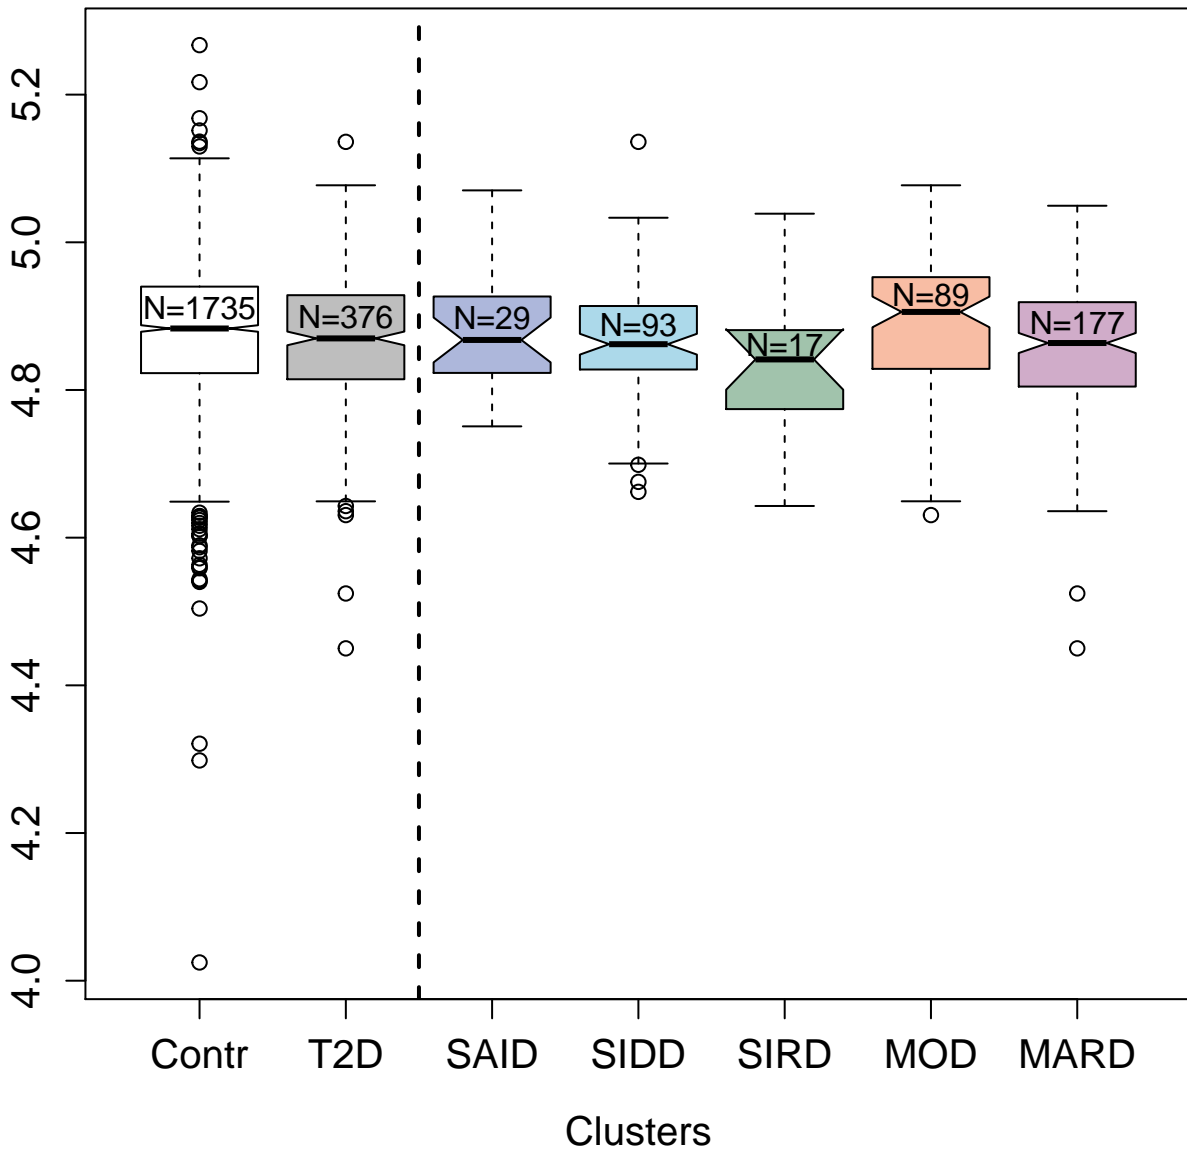

3643-90\_2 : SLIT and NTRK-like protein 1

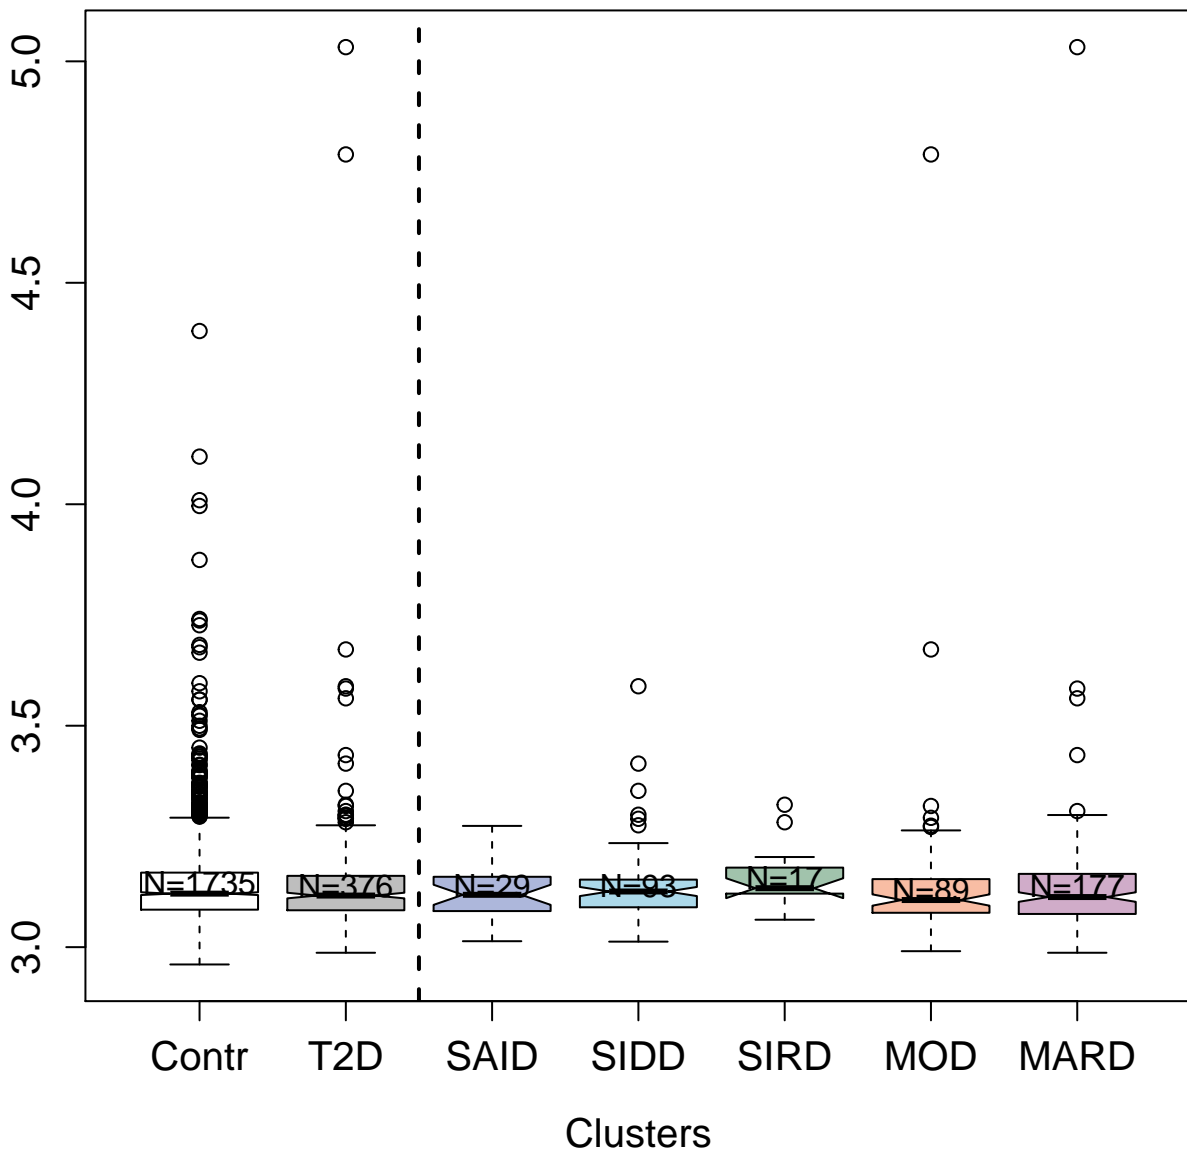

2730-58\_2 : MHC class I polypeptide-related  
sequence A

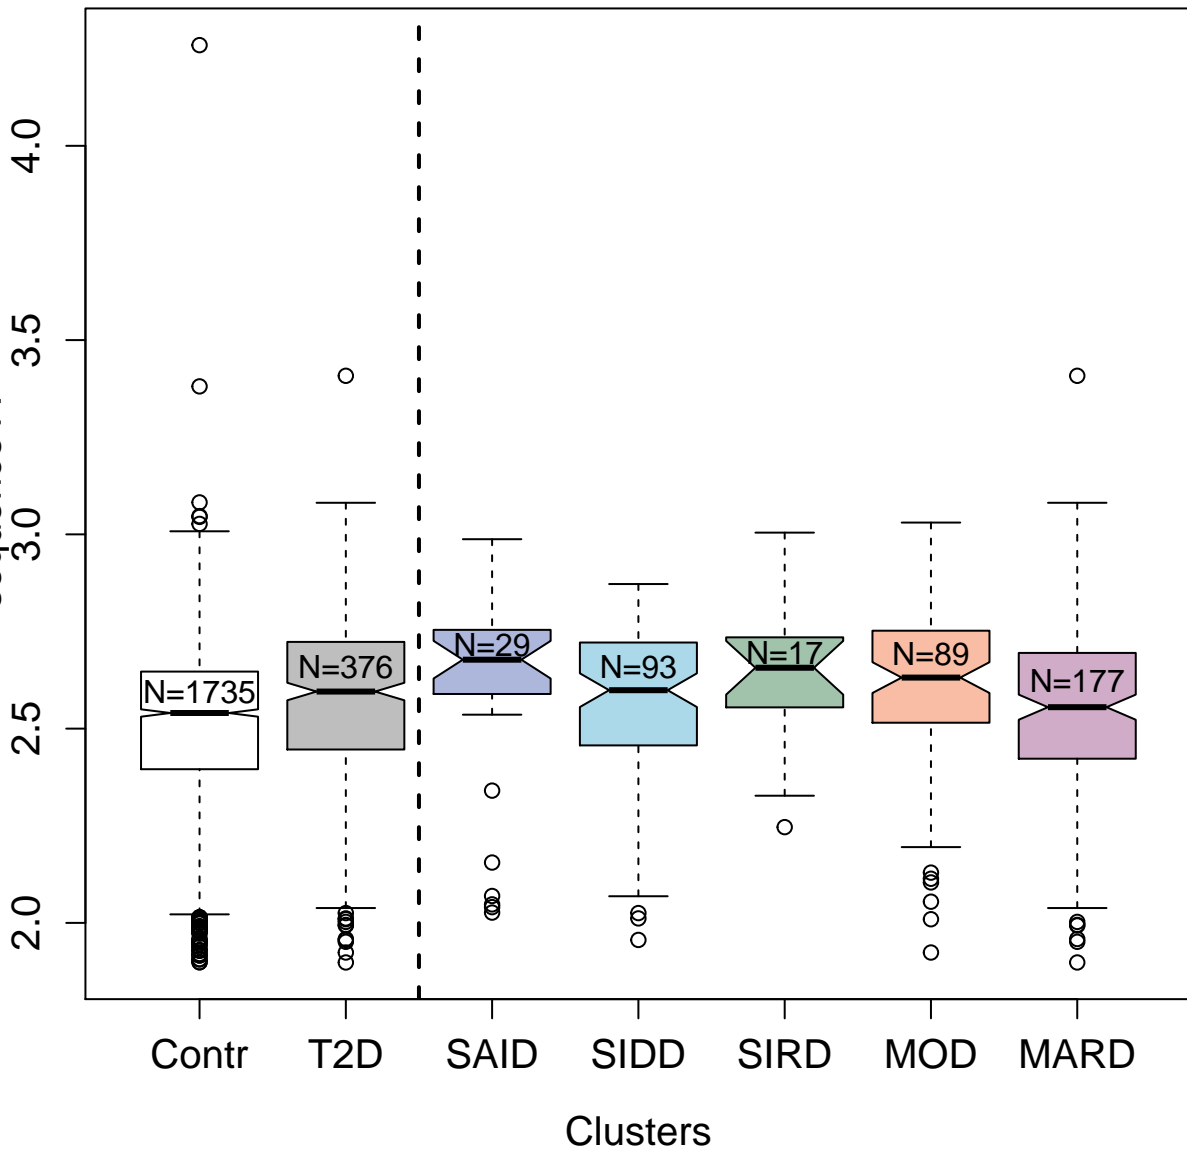



4786-58\_3 : UMP-CMP kinase

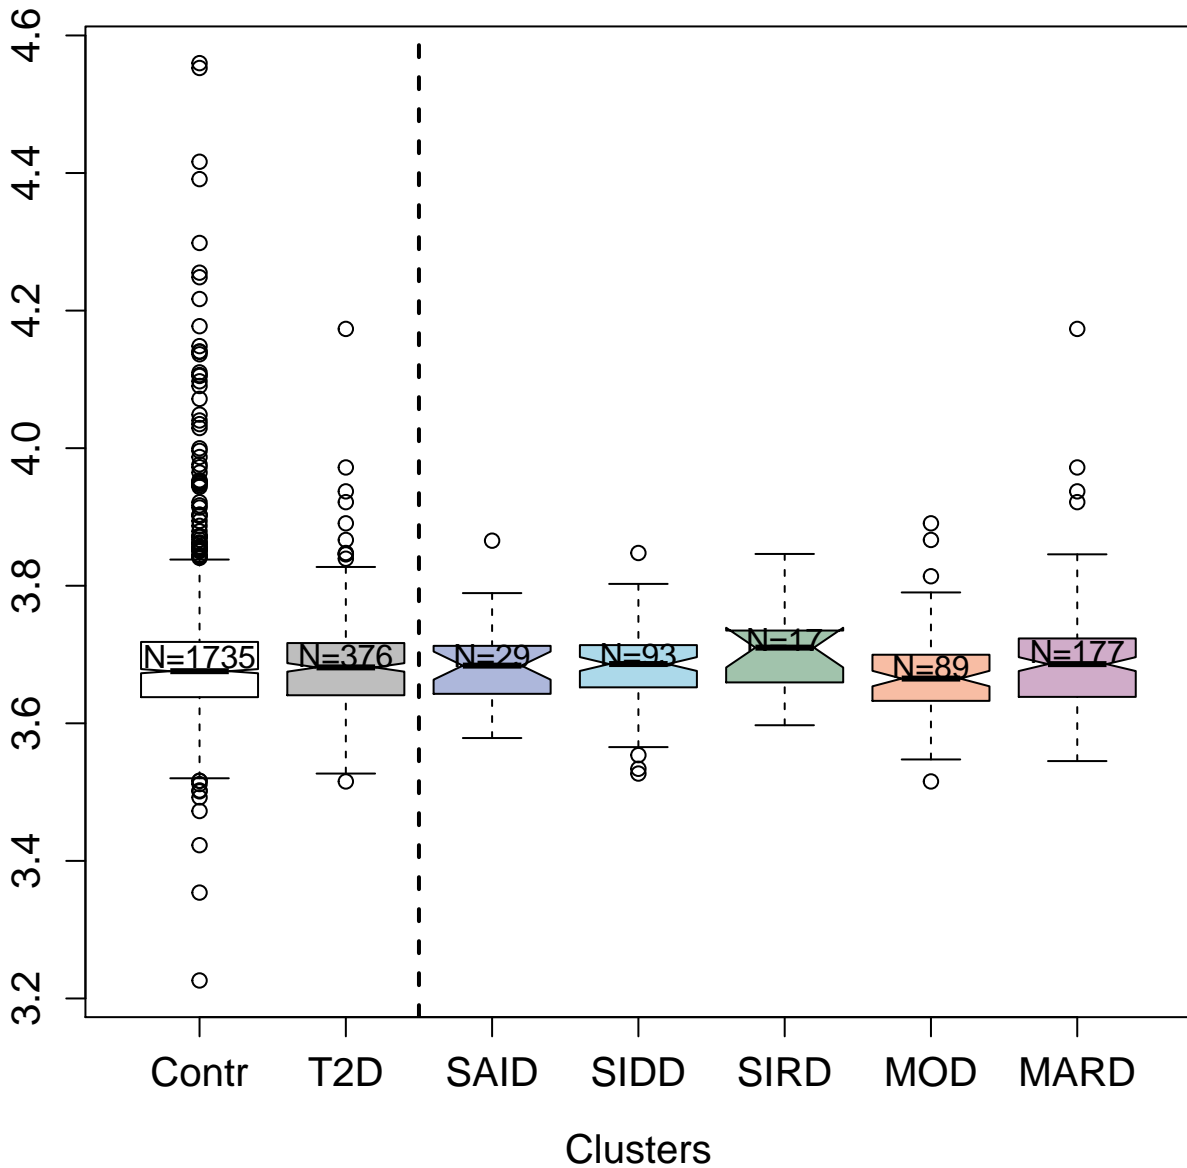

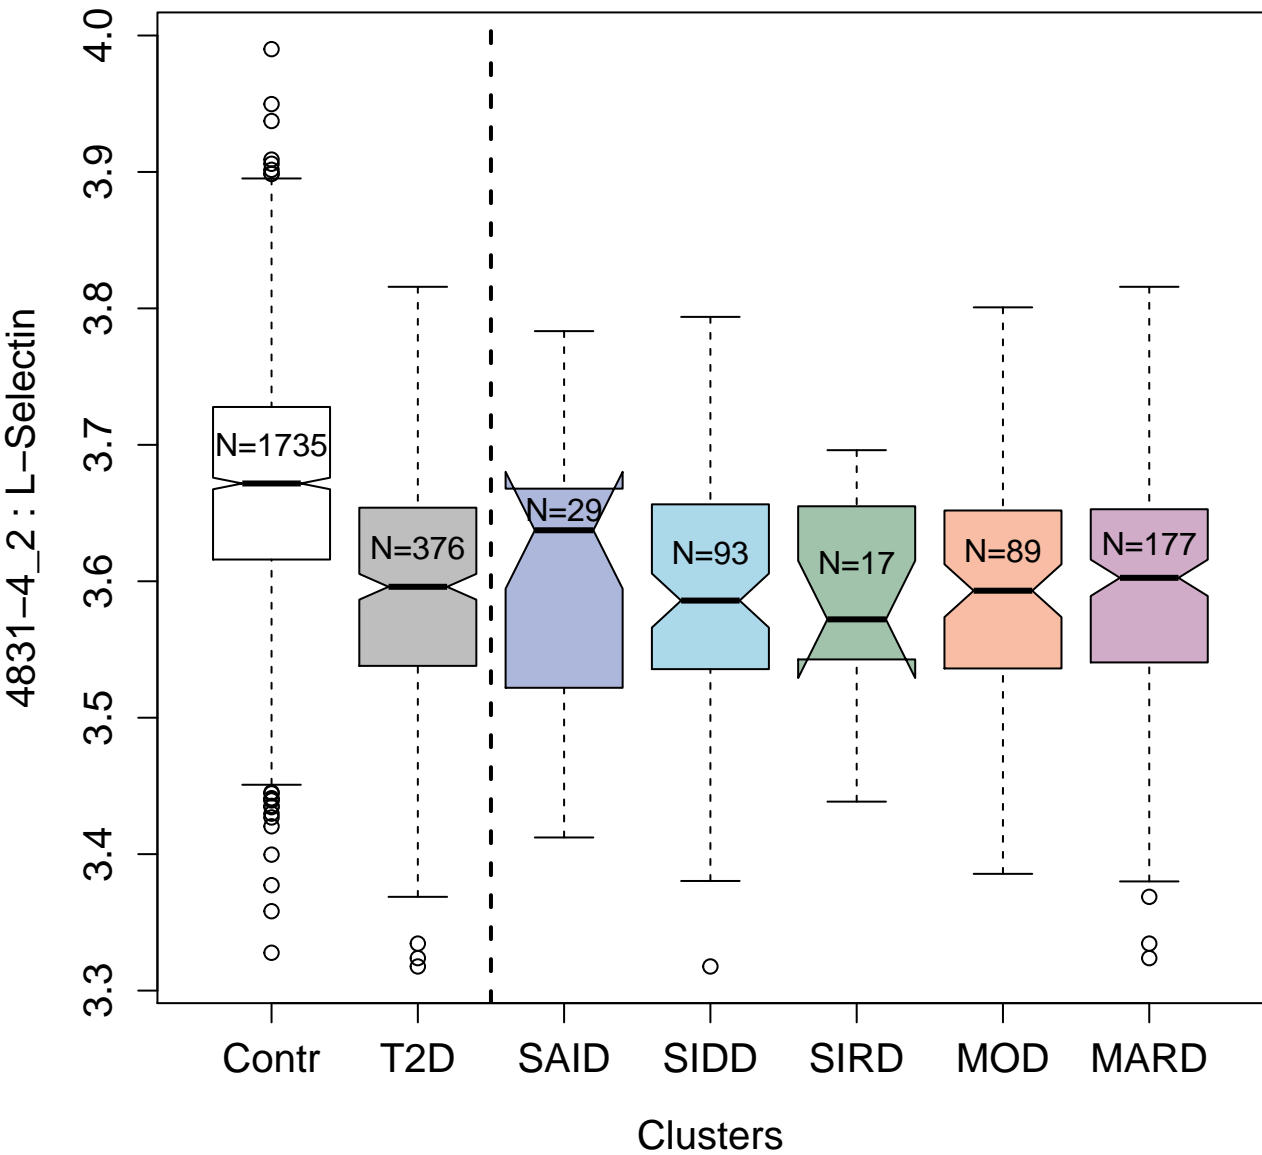

5100-53\_3 : Lysosome membrane protein 2

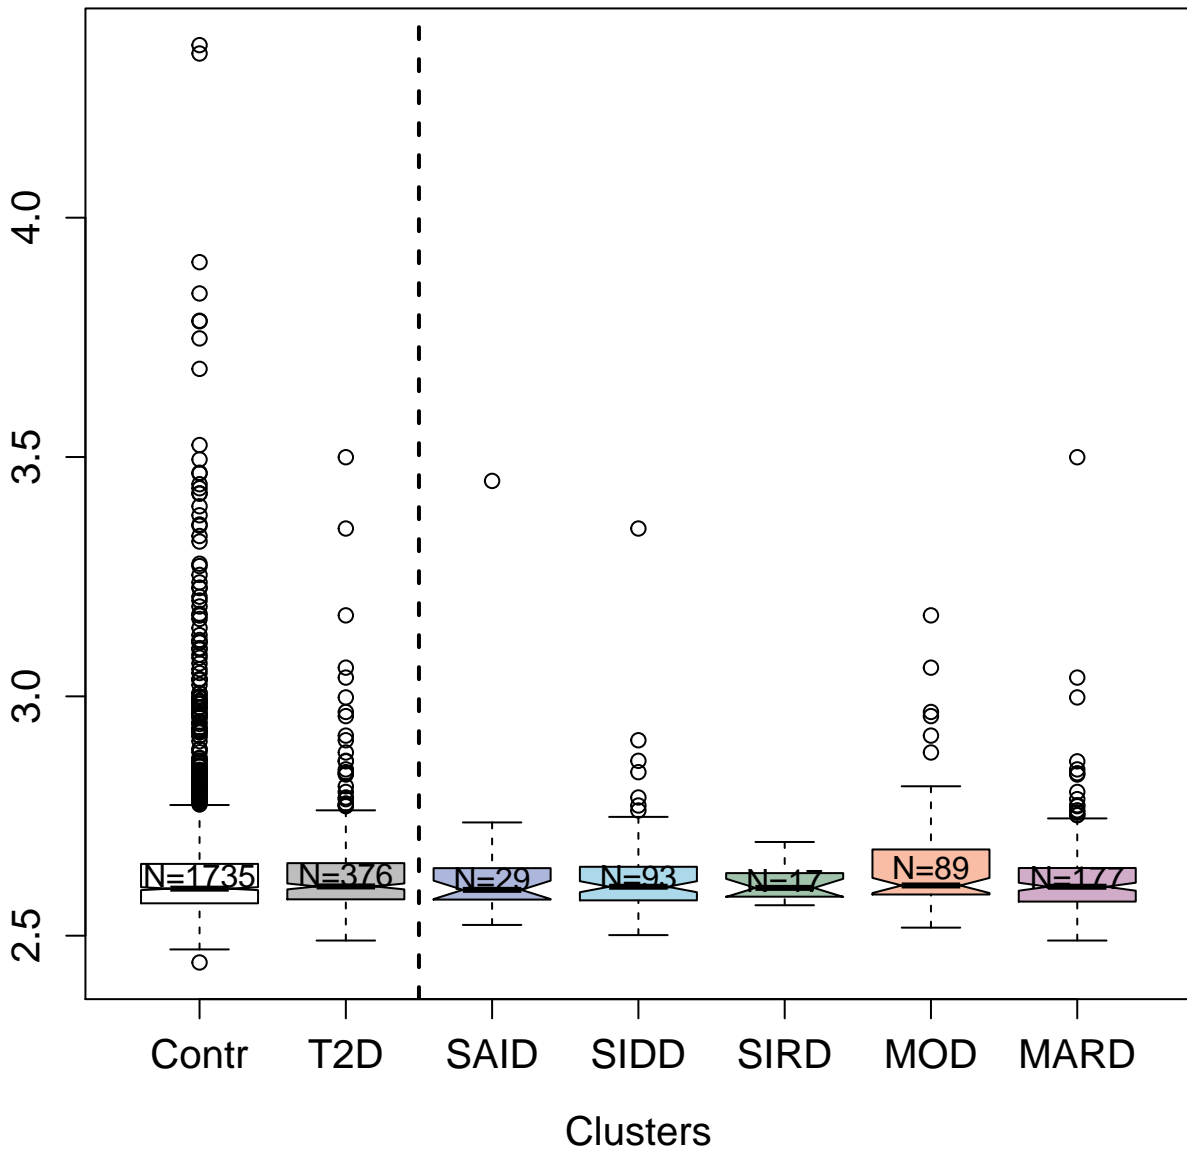

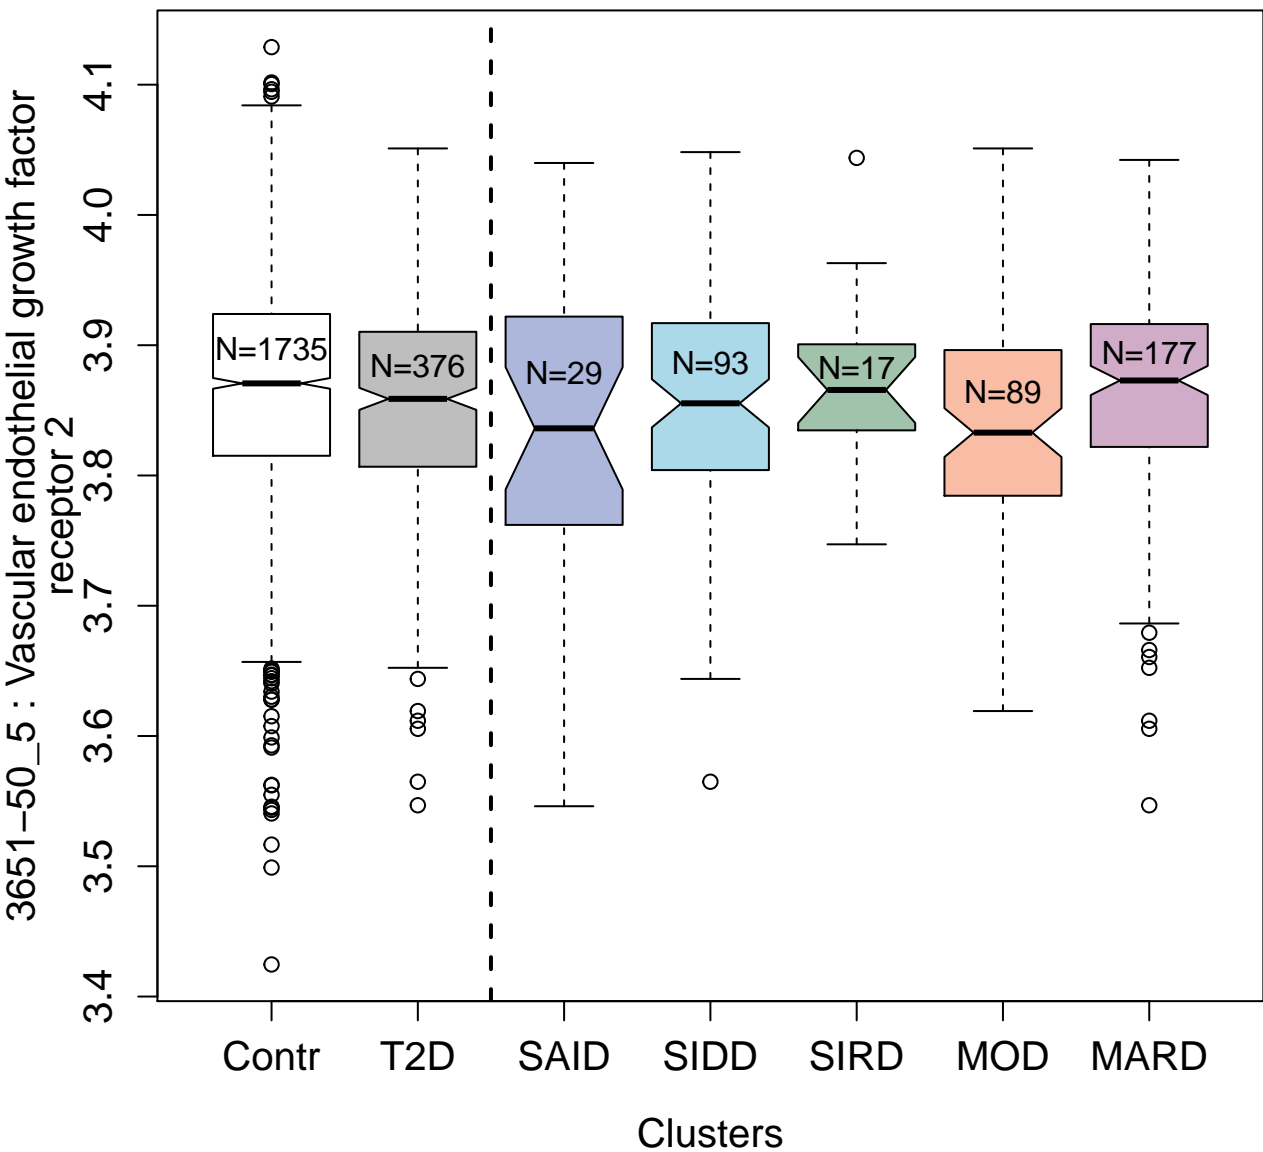

3387-1\_2 : Serine/threonine-protein kinase PAK 3

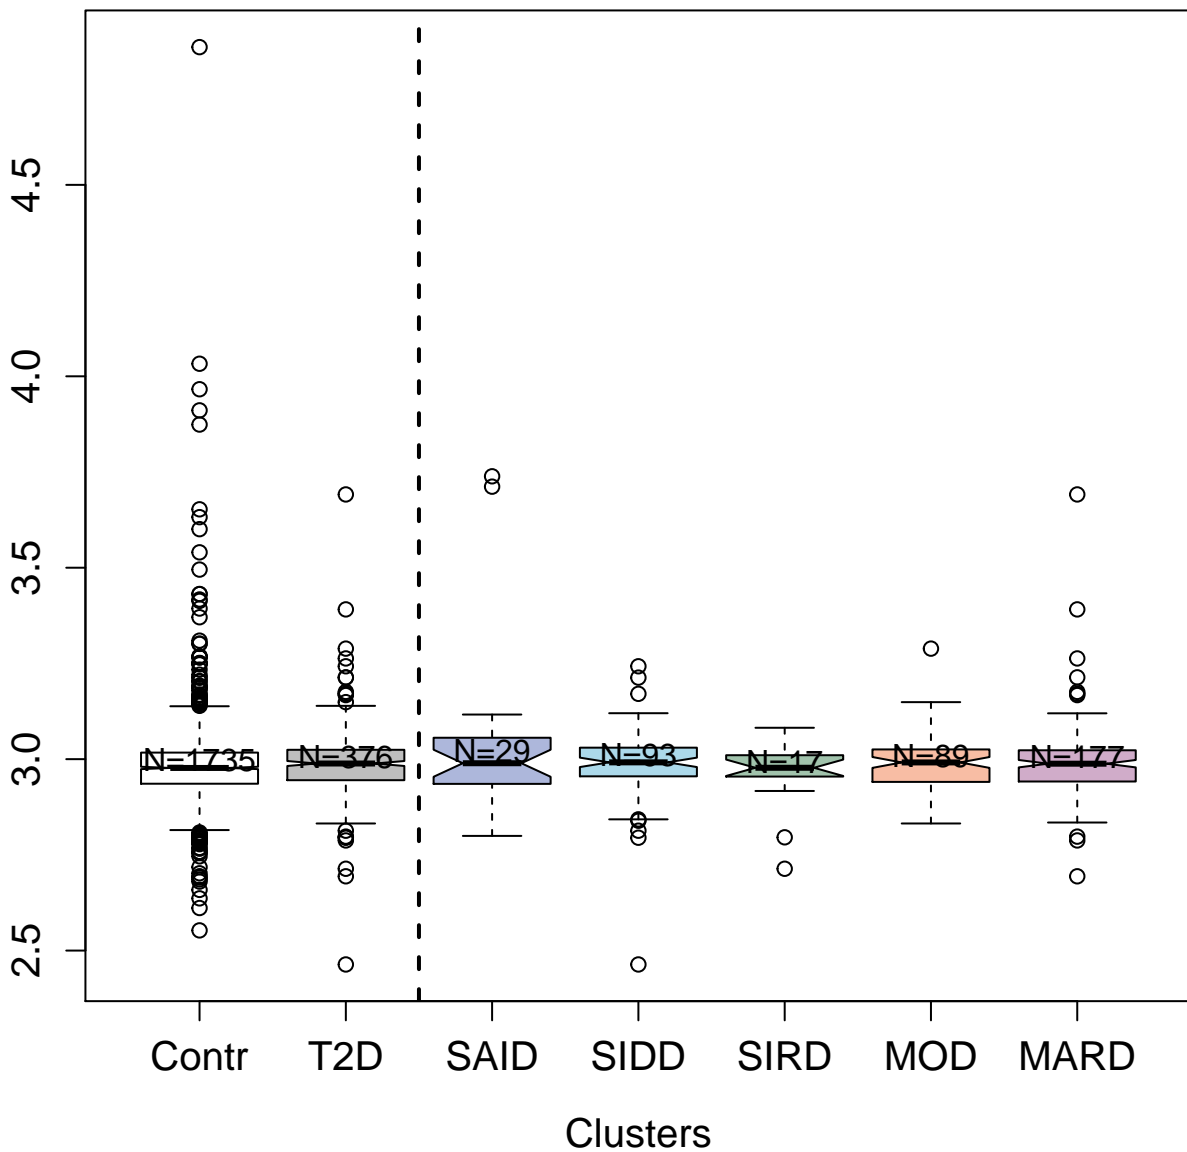

3624-3\_4 : Serine protease 27

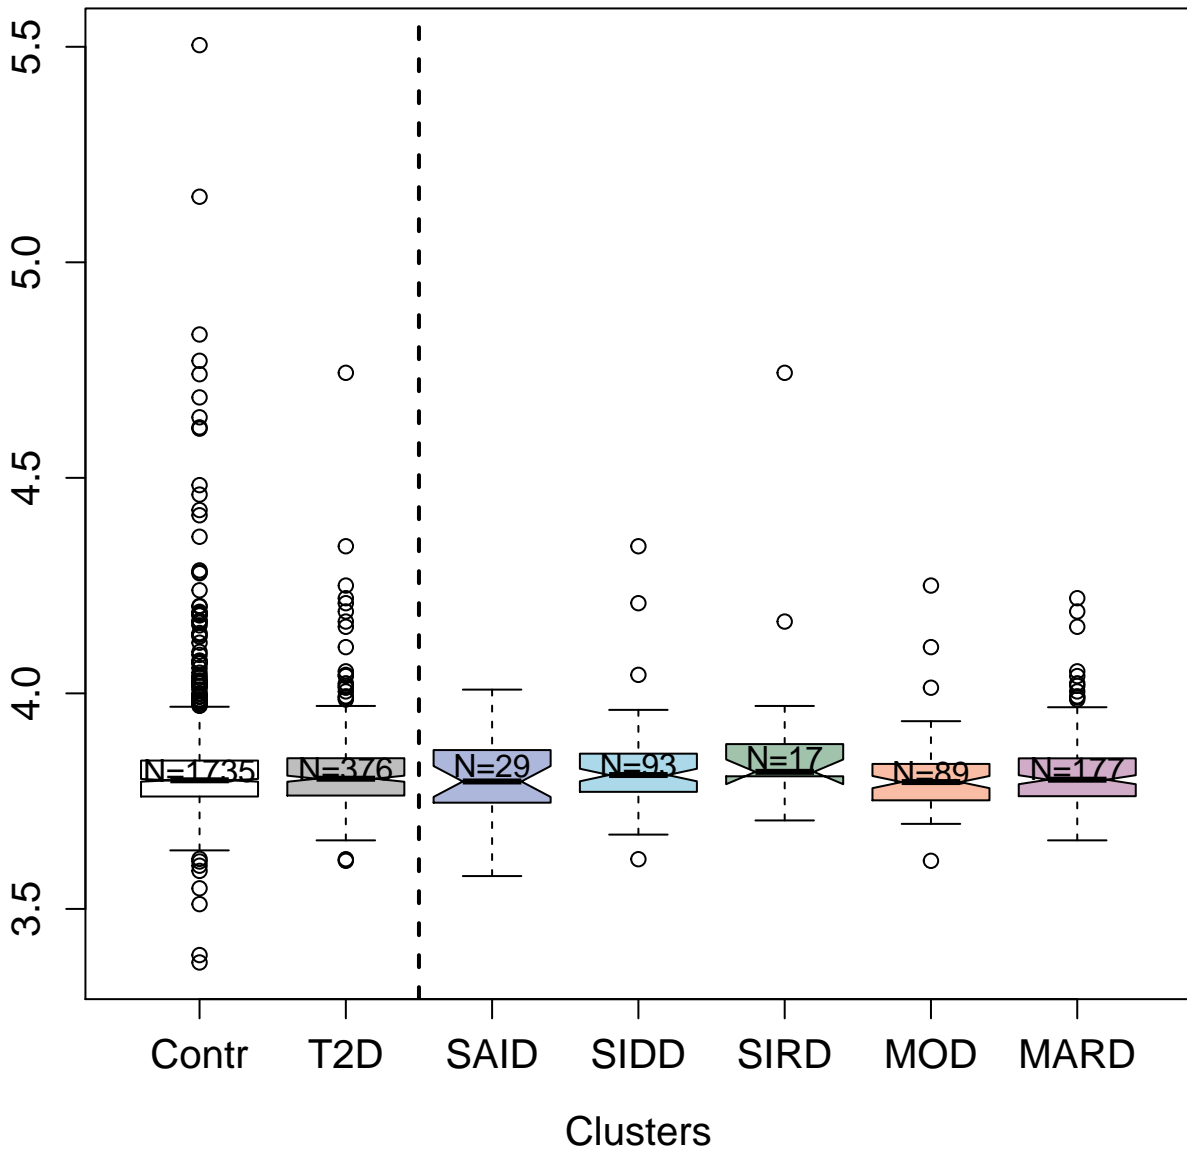

4774-62\_3 : Protein FAM107B

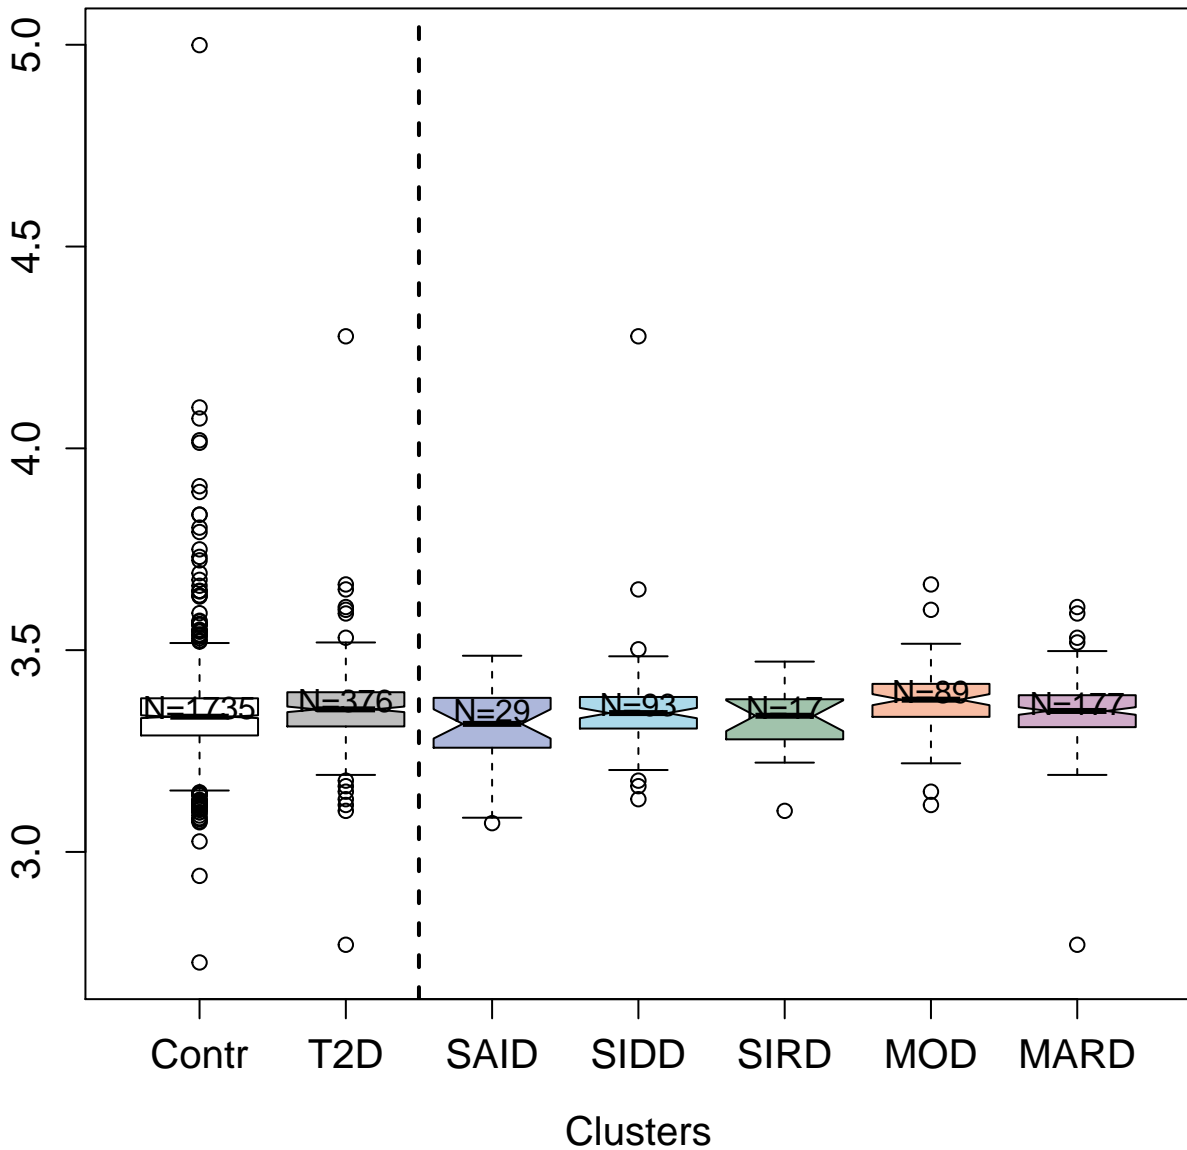

2705-5\_2 : C-C motif chemokine 25

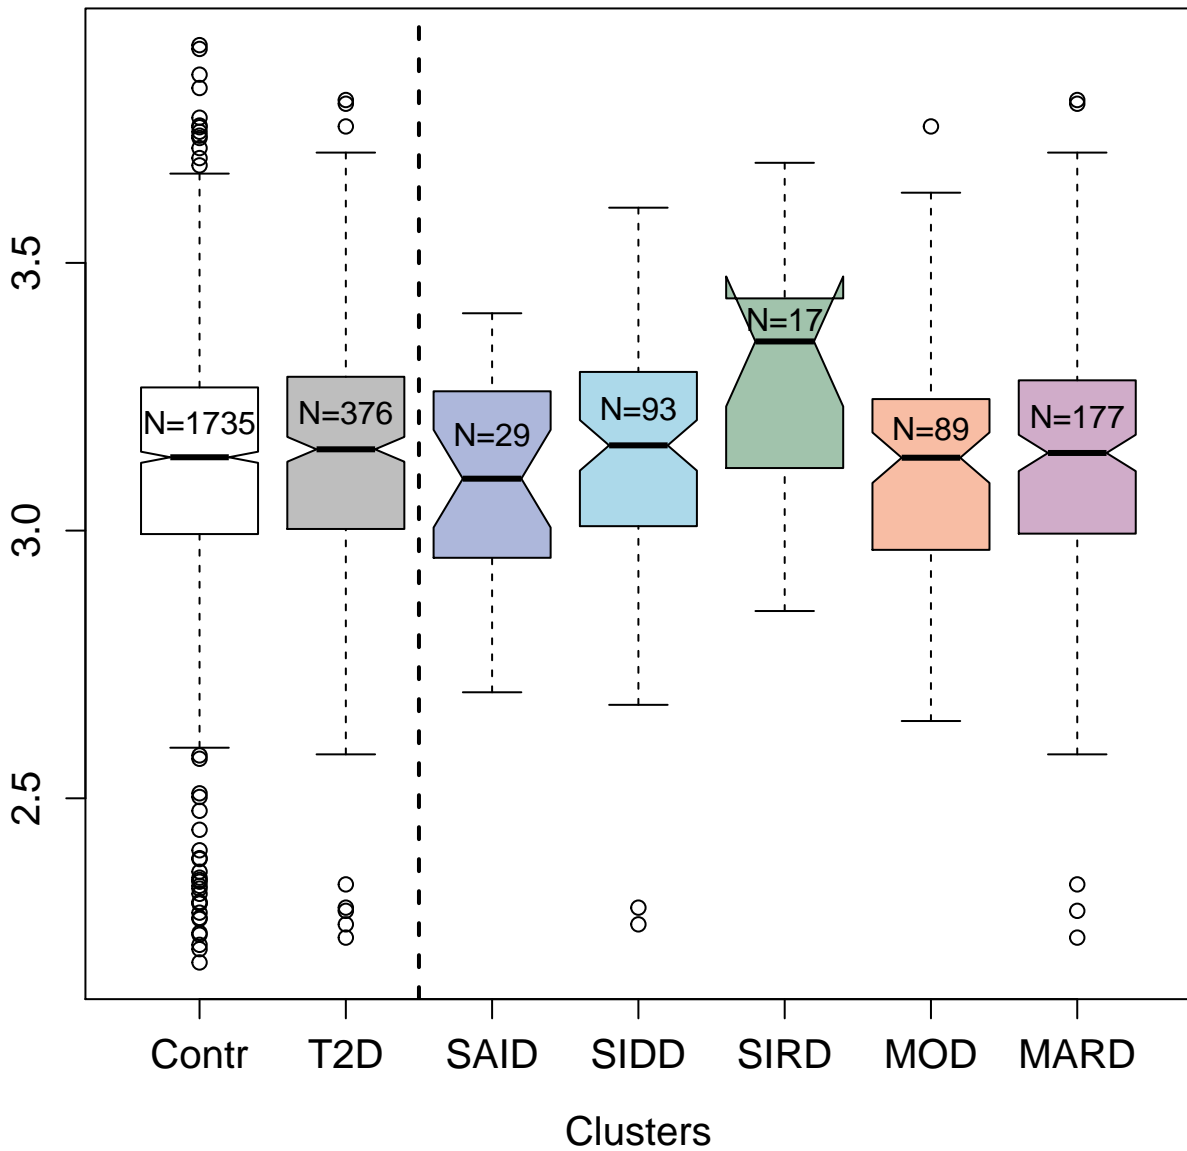



3390-72\_2 : PIK3CA/PIK3R1

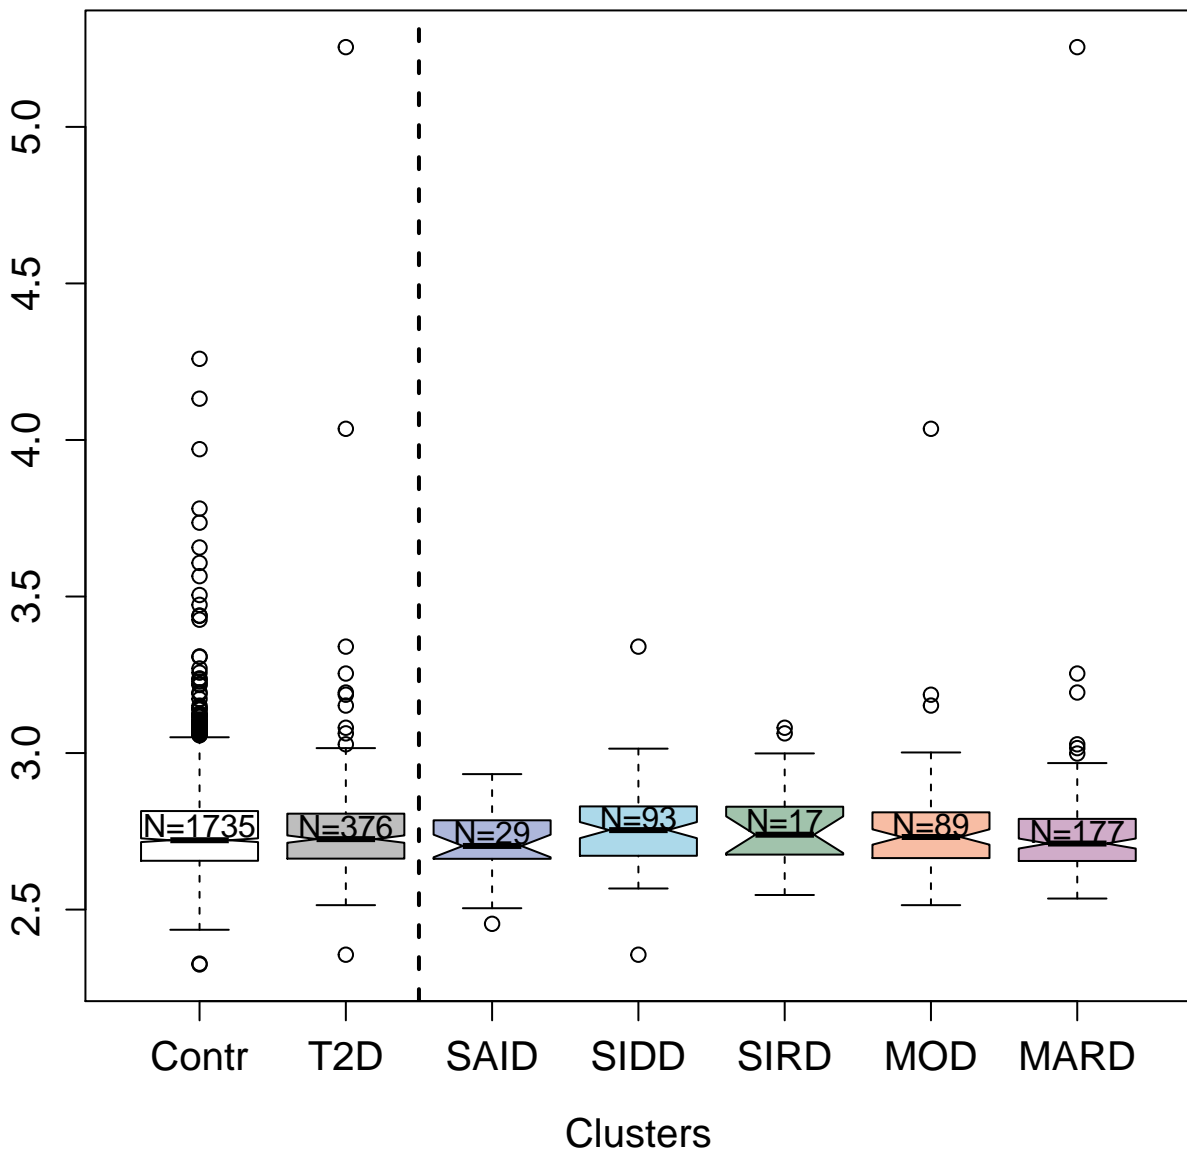

2468-62\_3 : C-C motif chemokine 20

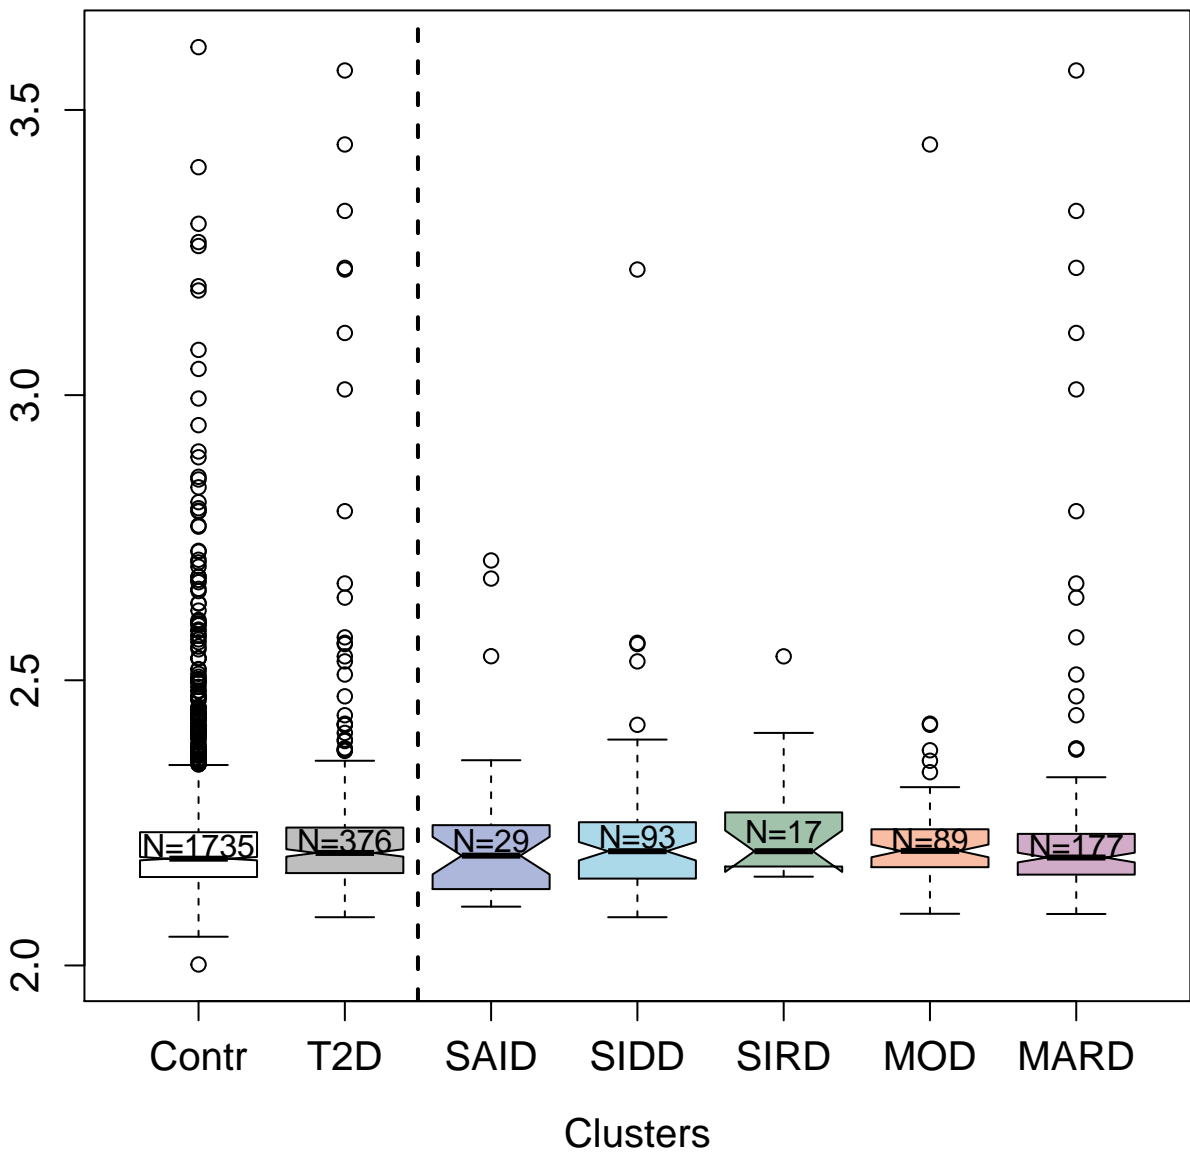

3654-27\_5 : BMP-binding endothelial regulator

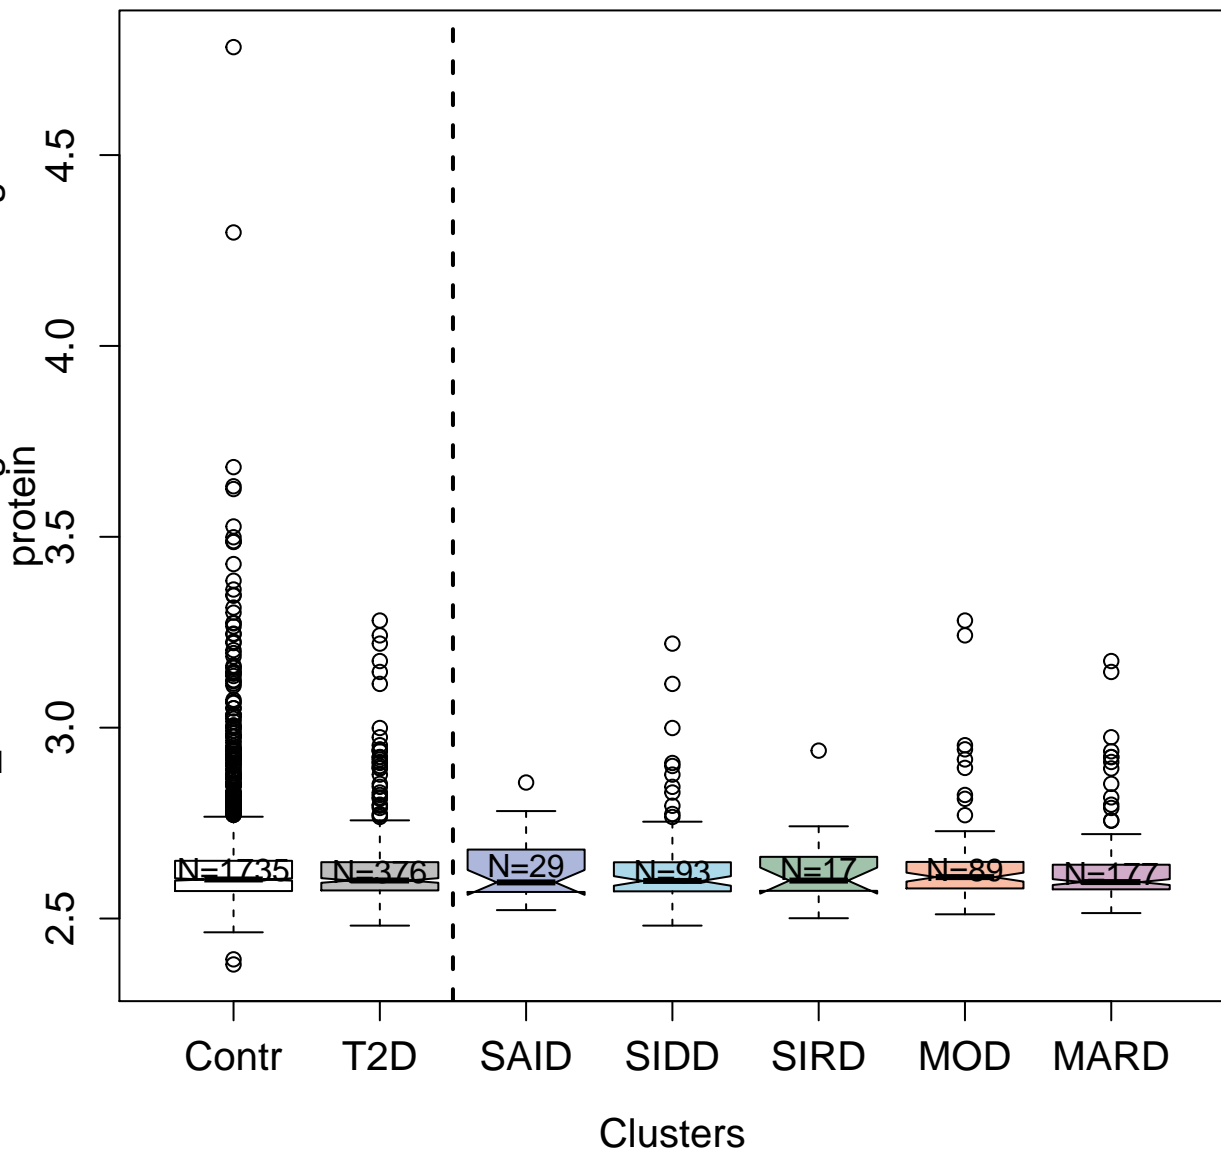

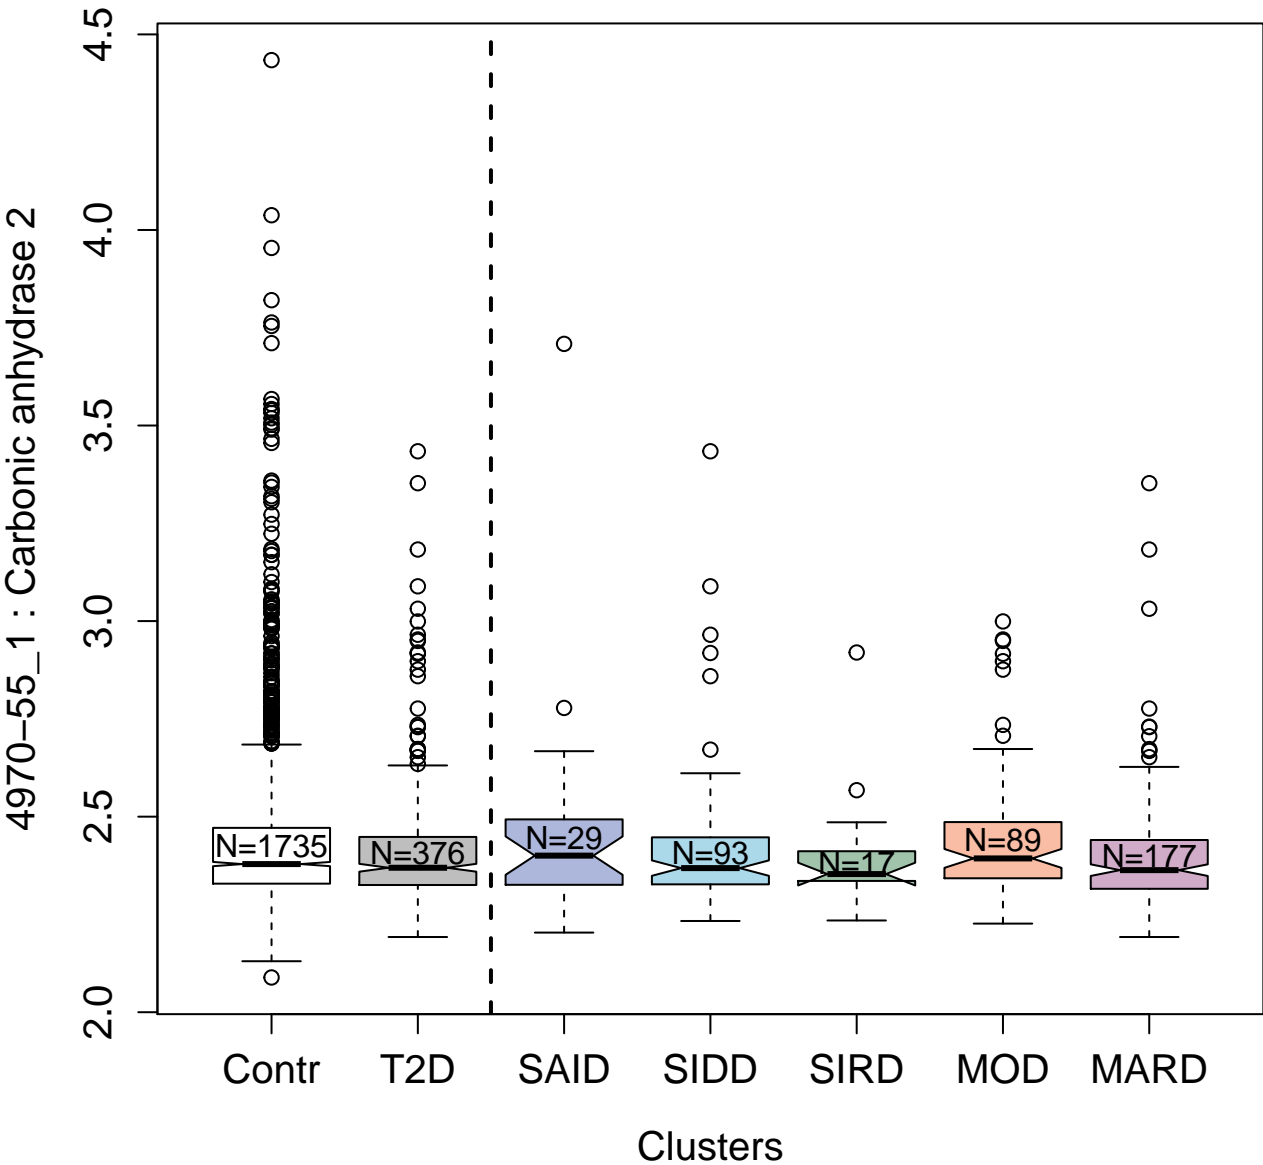

2658-27\_1 : NT-3 growth factor receptor

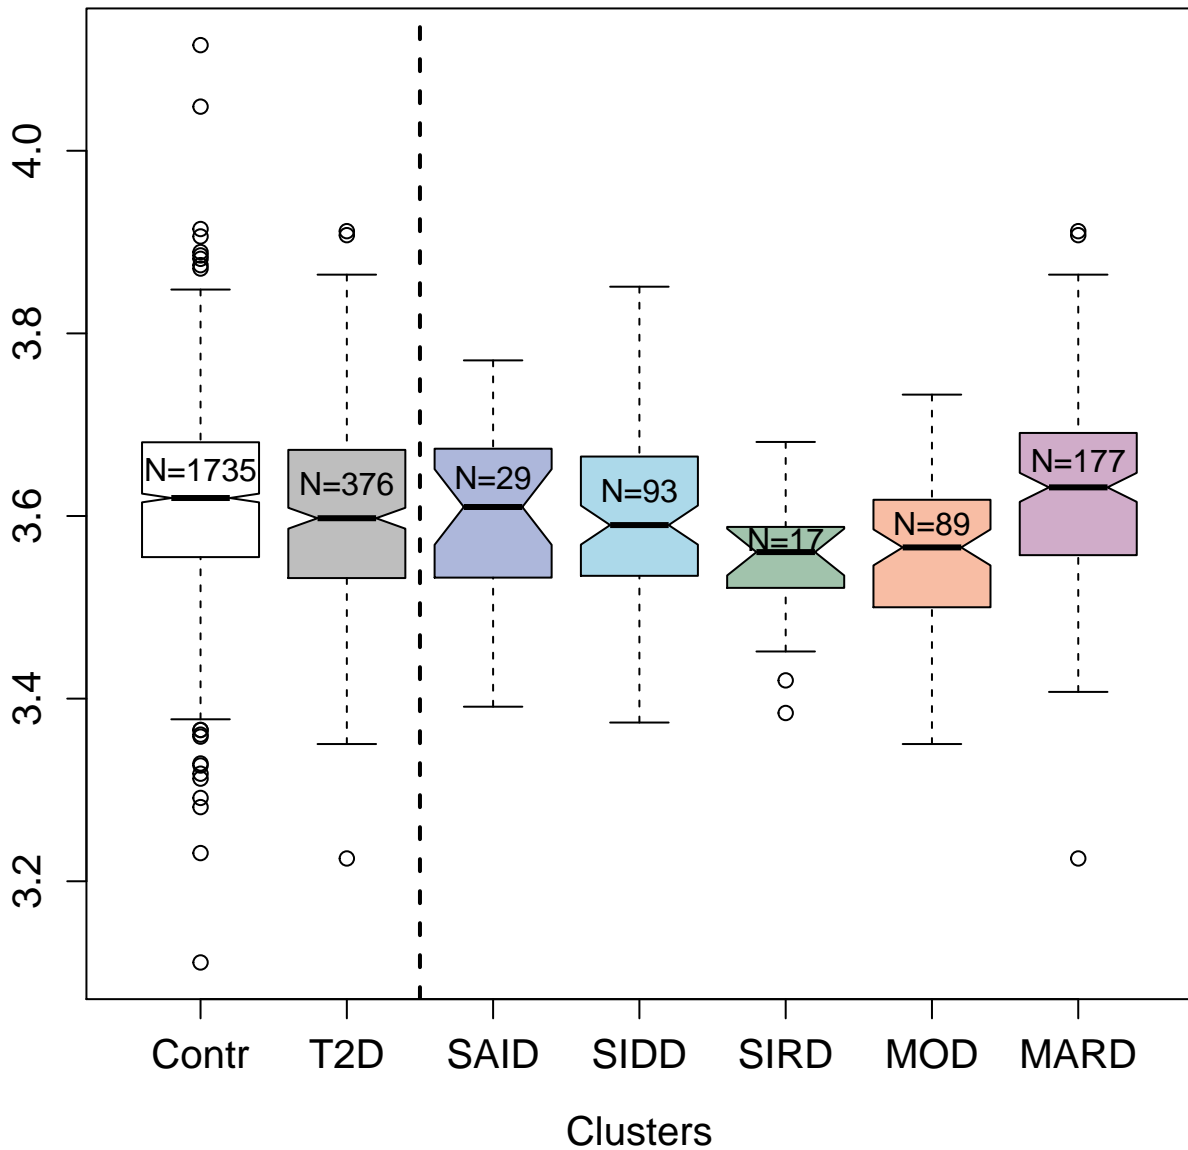

5006-71\_1 : Mitogen-activated protein kinase 13

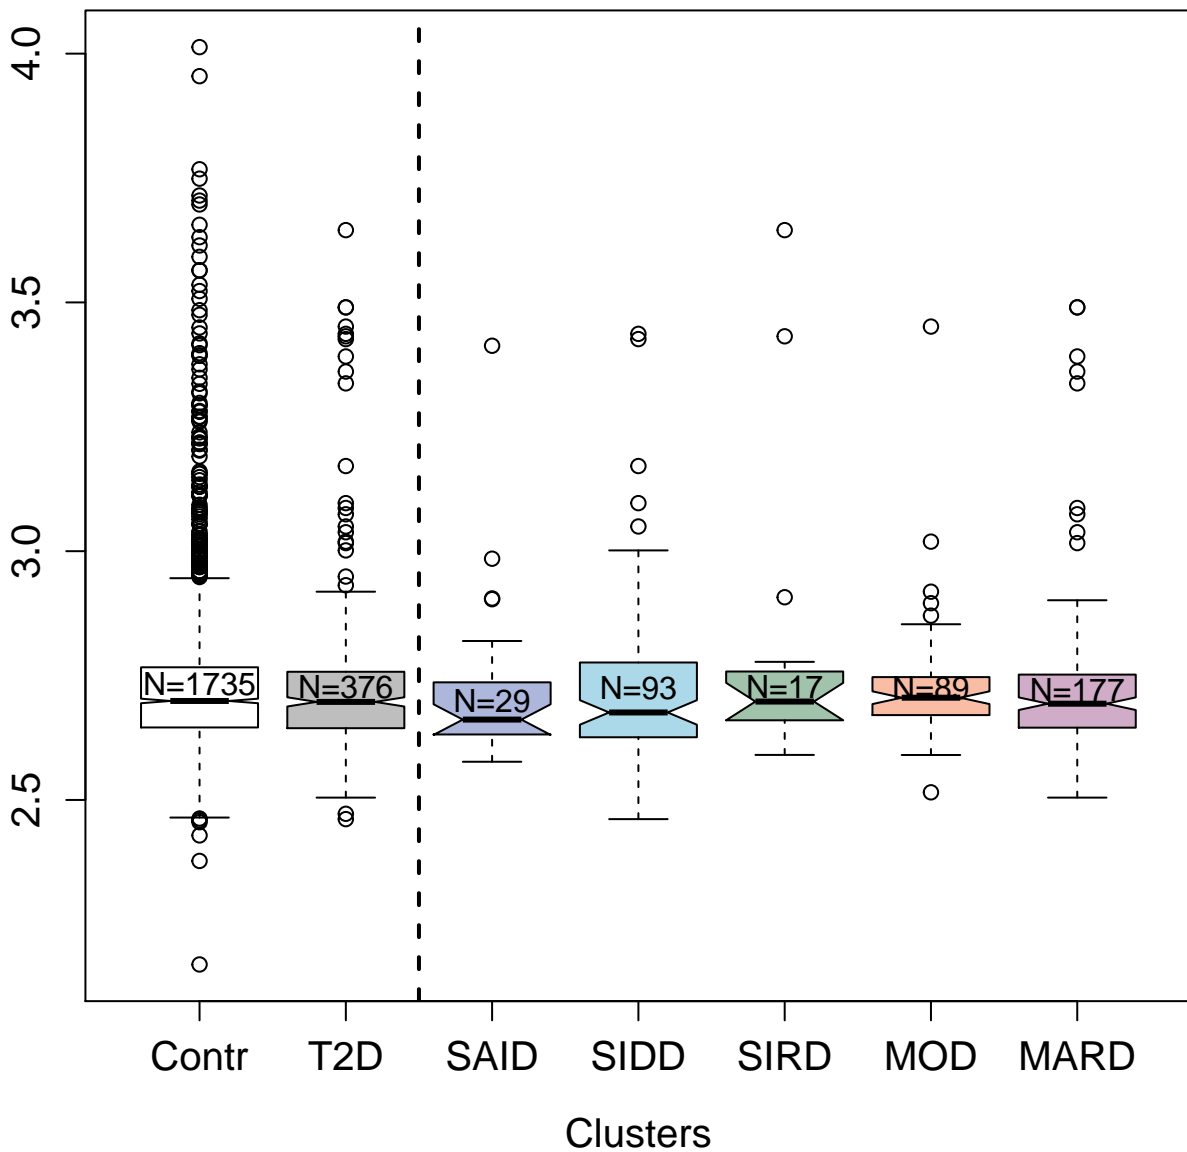

5223-59\_3 : Glucokinase regulatory protein

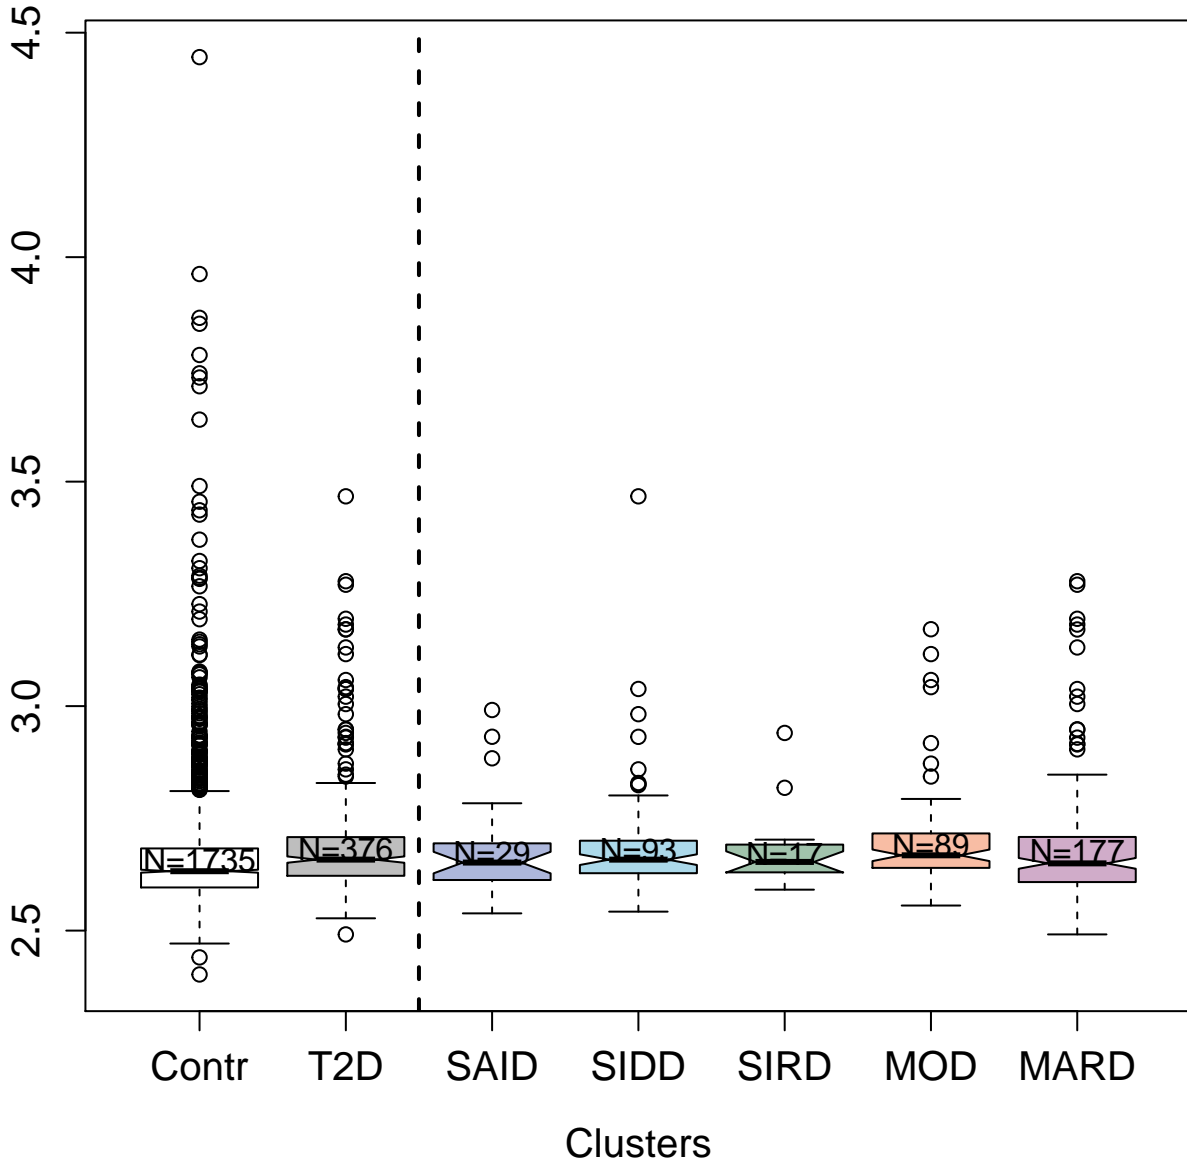

2695-25\_1 : Platelet endothelial cell adhesion molecule

3.8  
3.6  
3.4  
3.2  
3.0  
2.8

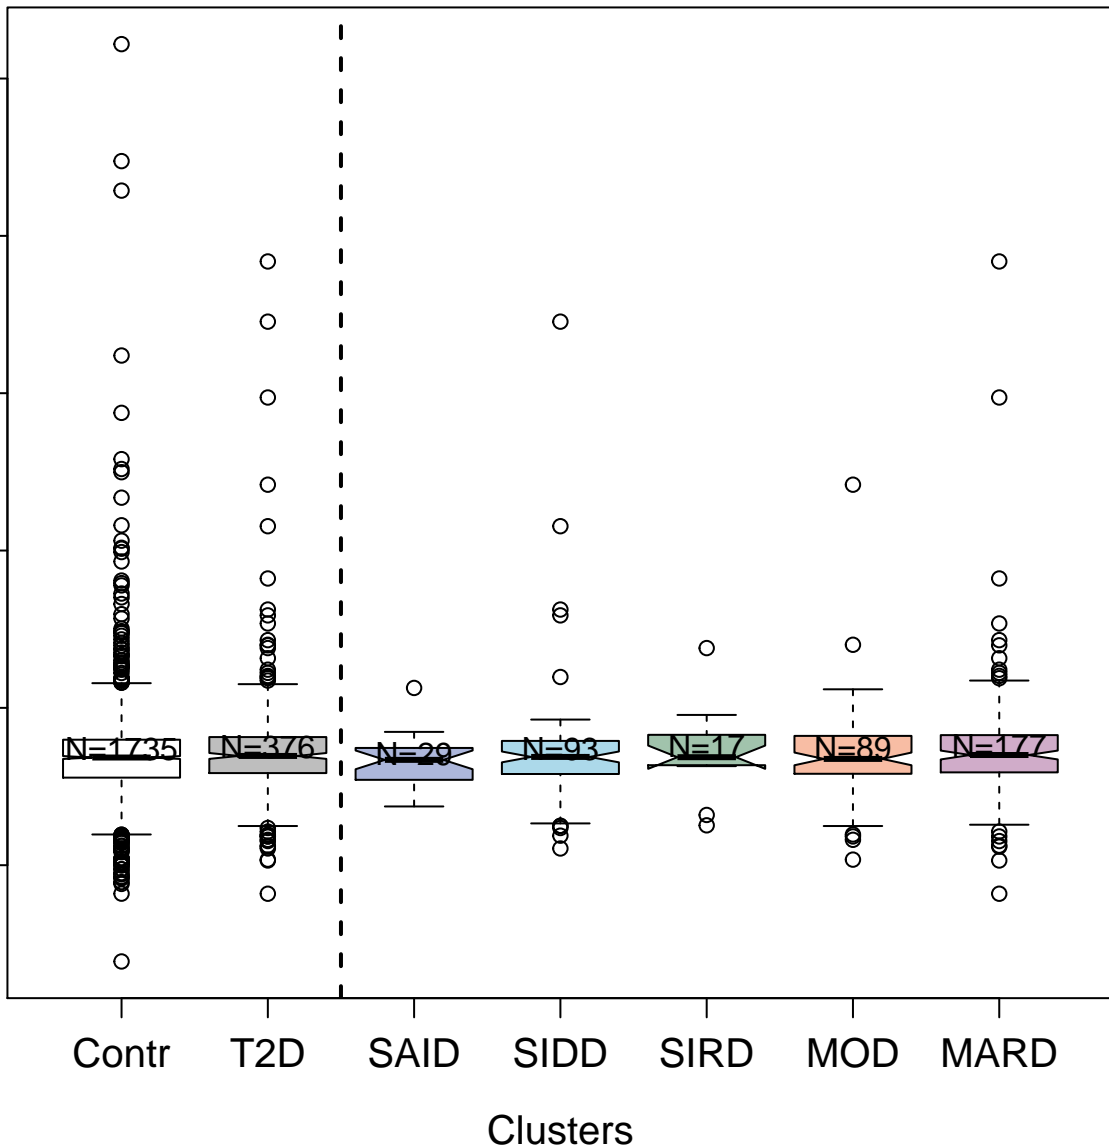



3022-4\_2 : Cytotoxic T-lymphocyte protein 4

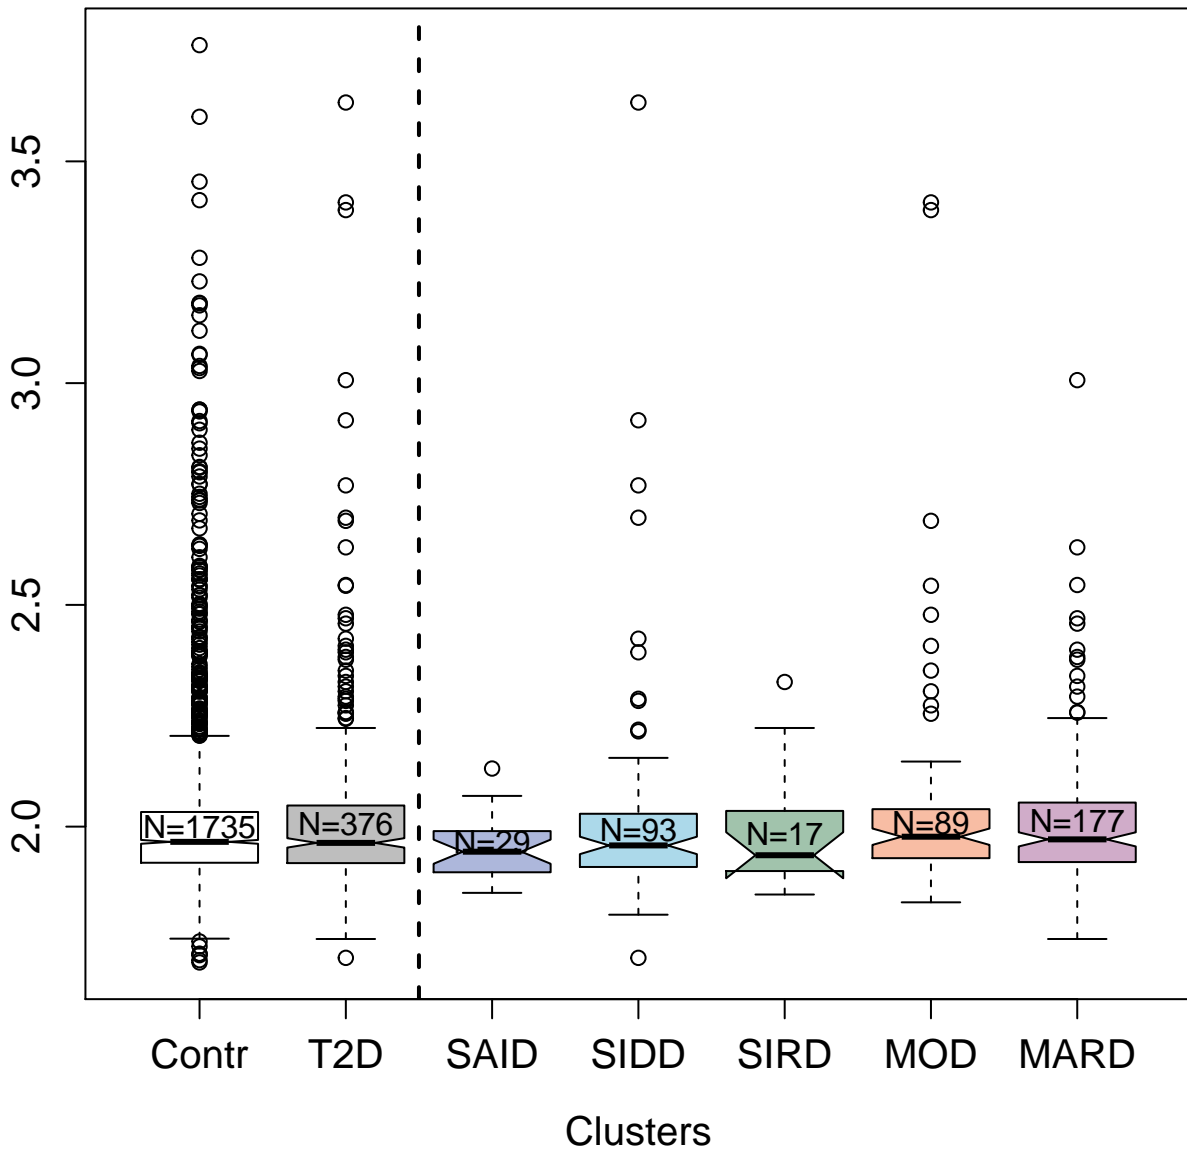

4862-63\_1 : Bone morphogenetic protein receptor  
type-2

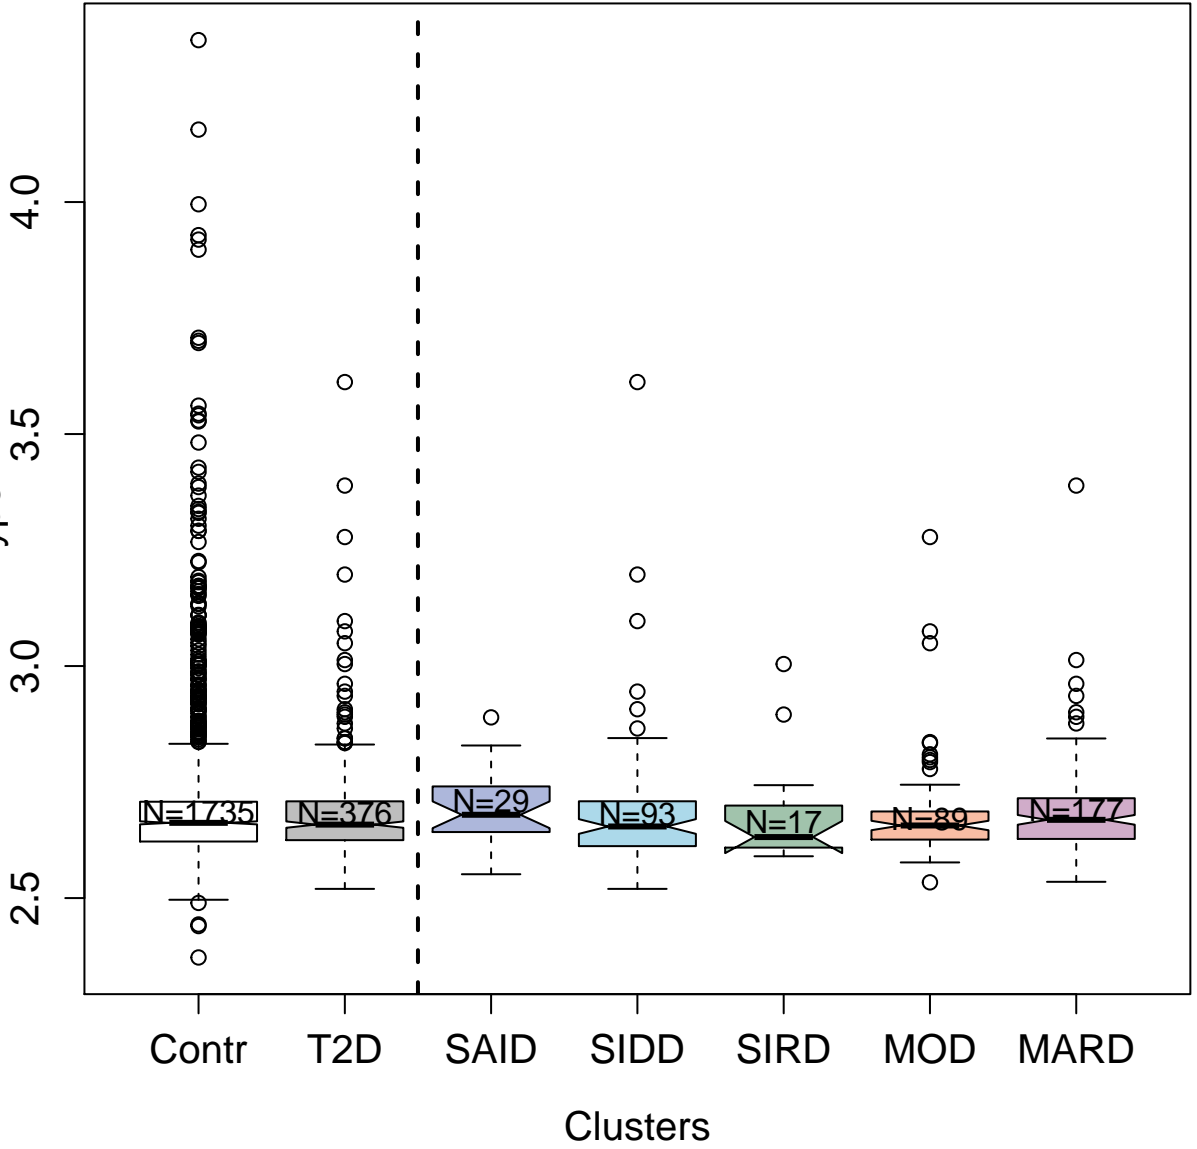

4124-24\_2 : Heat shock 70 kDa protein 1A

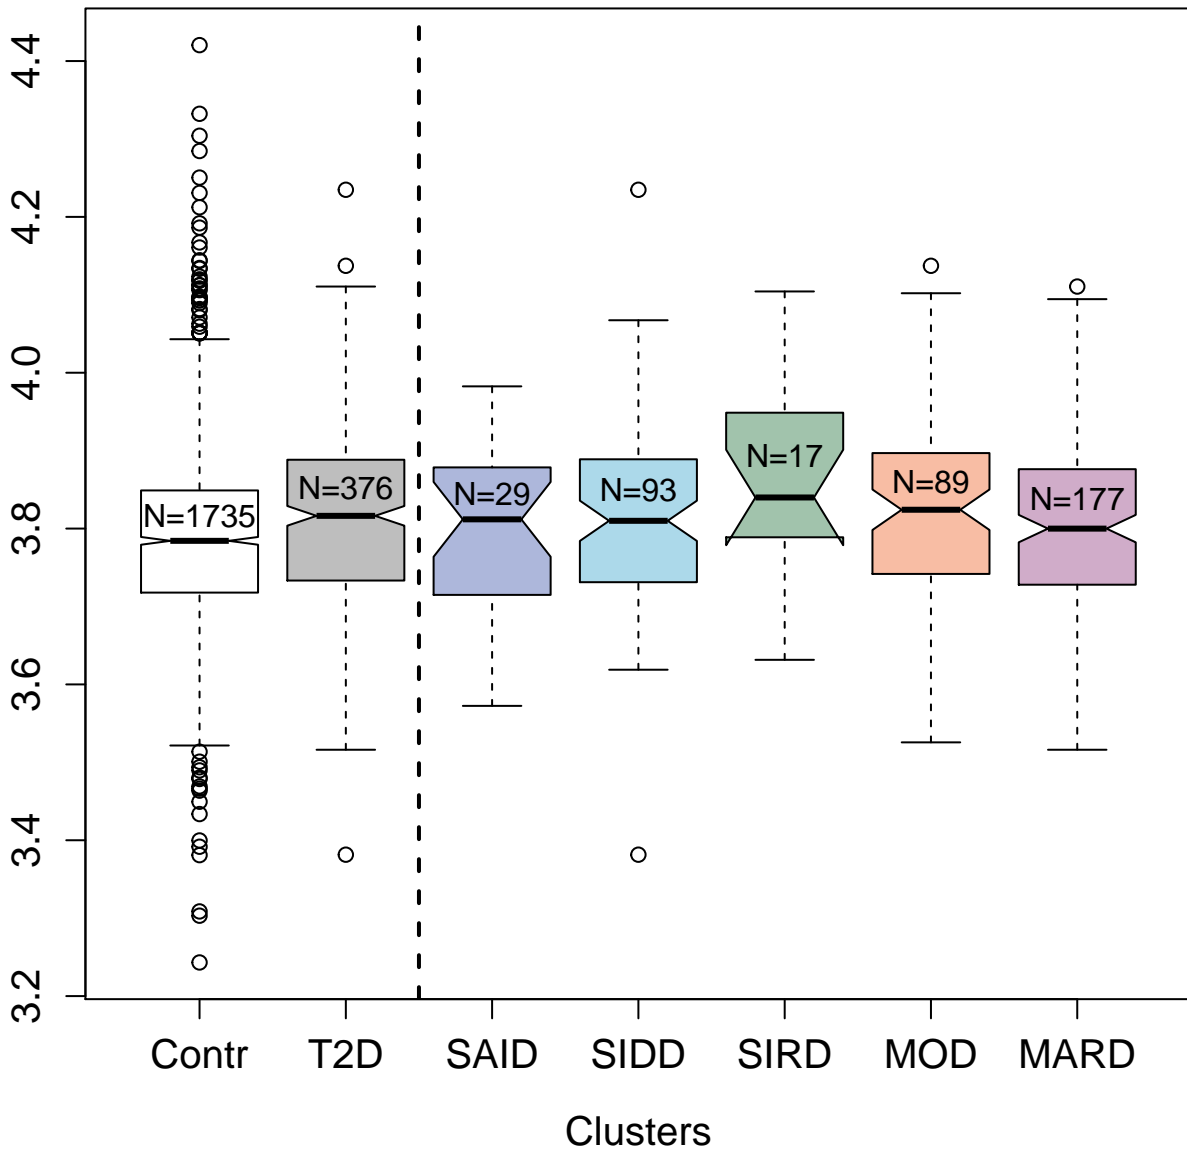

3221-54\_1 : Secreted frizzled-related protein 1

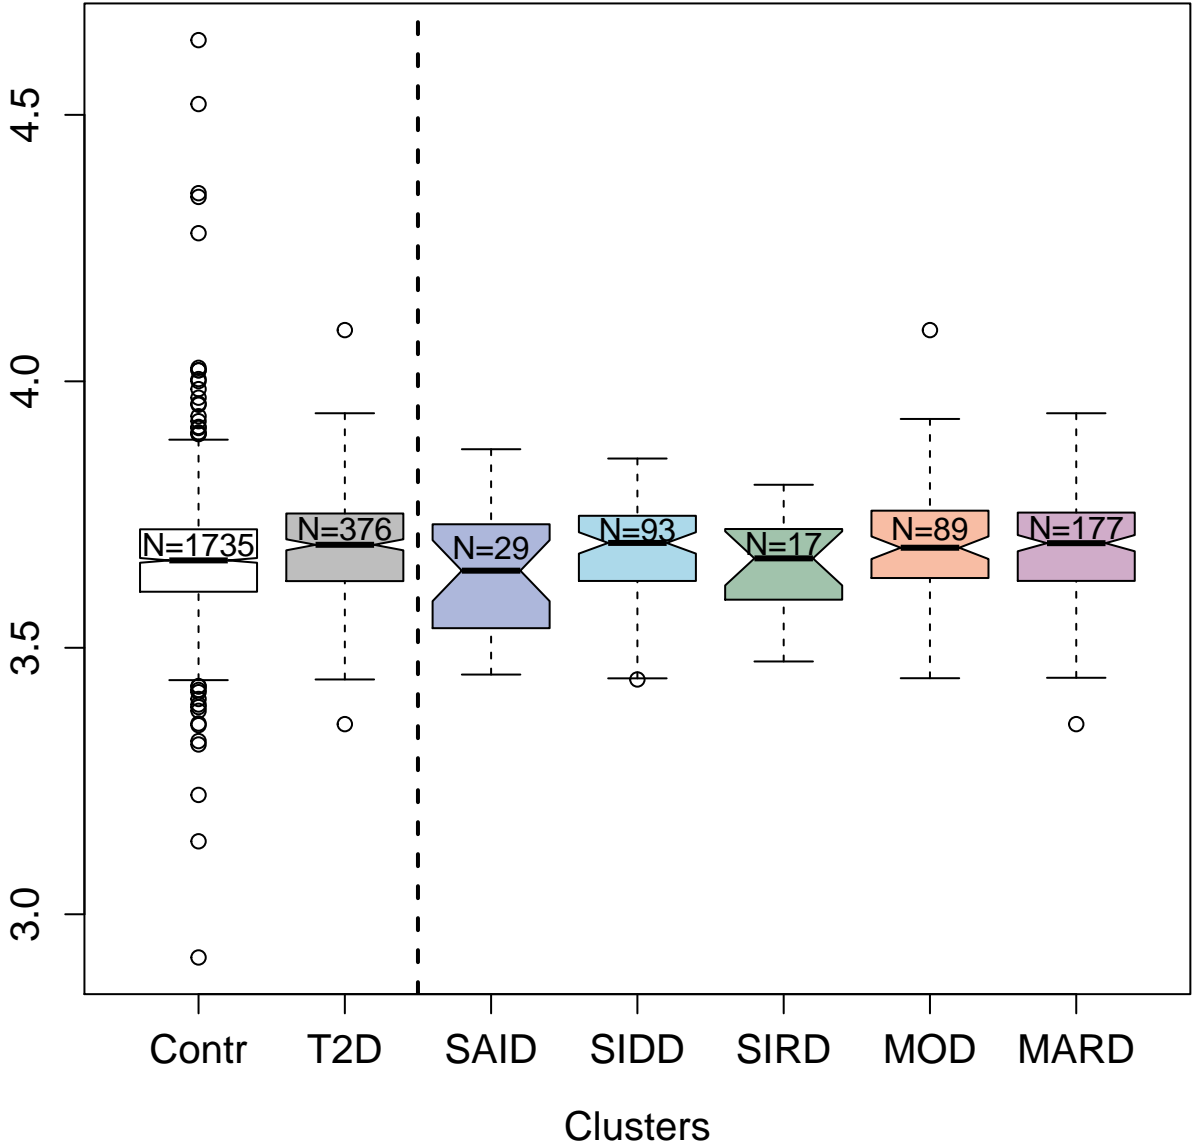

2755-8\_2 : C3a anaphylatoxin des Arginine

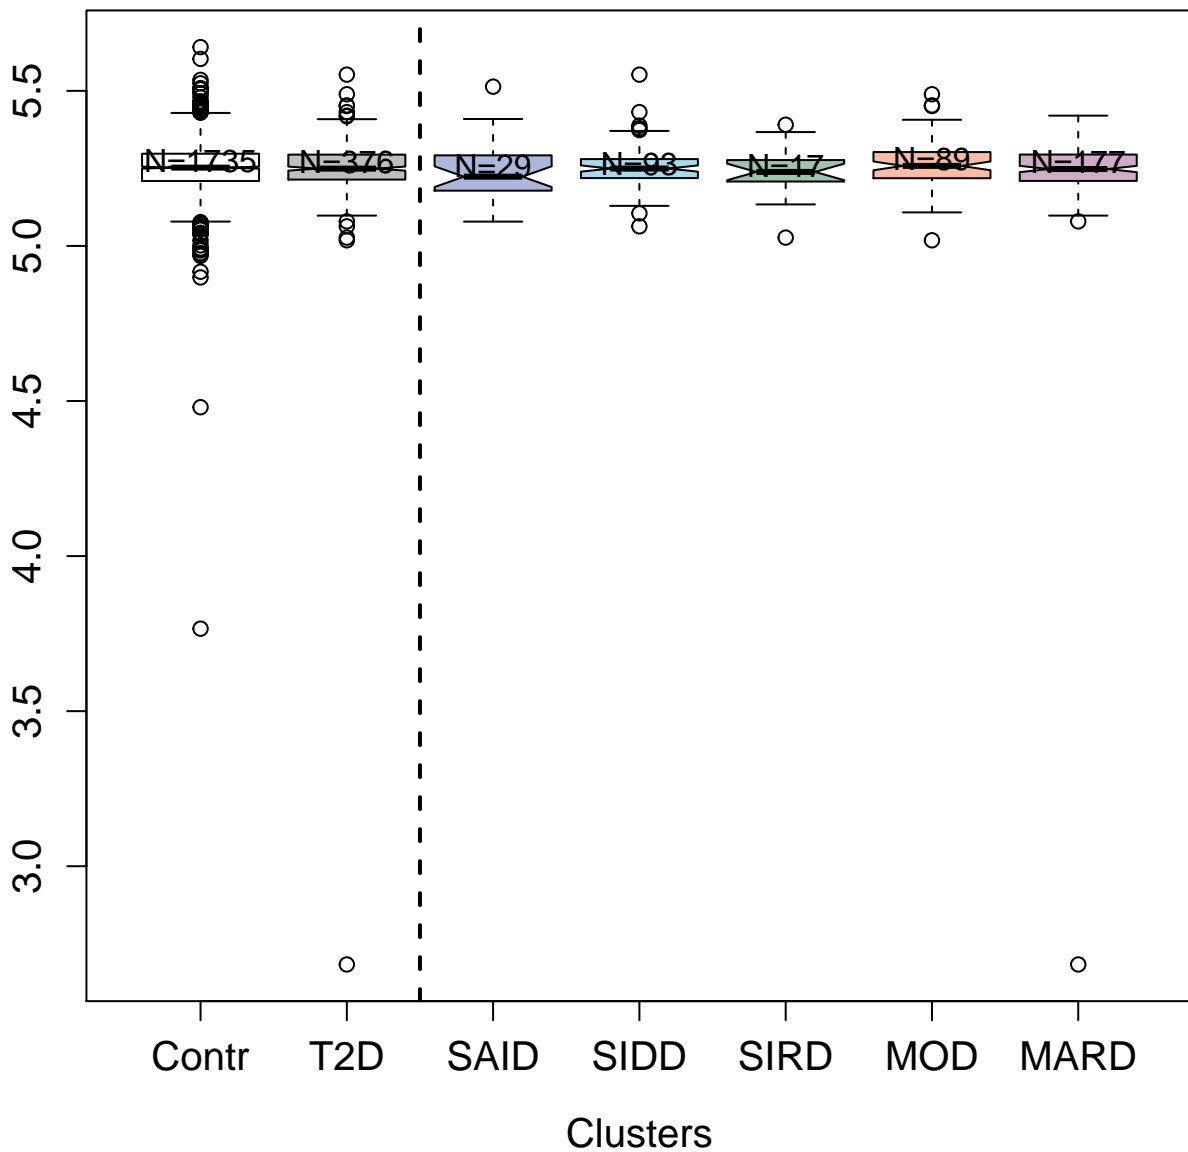

2474-54\_5 : Serum amyloid P-component

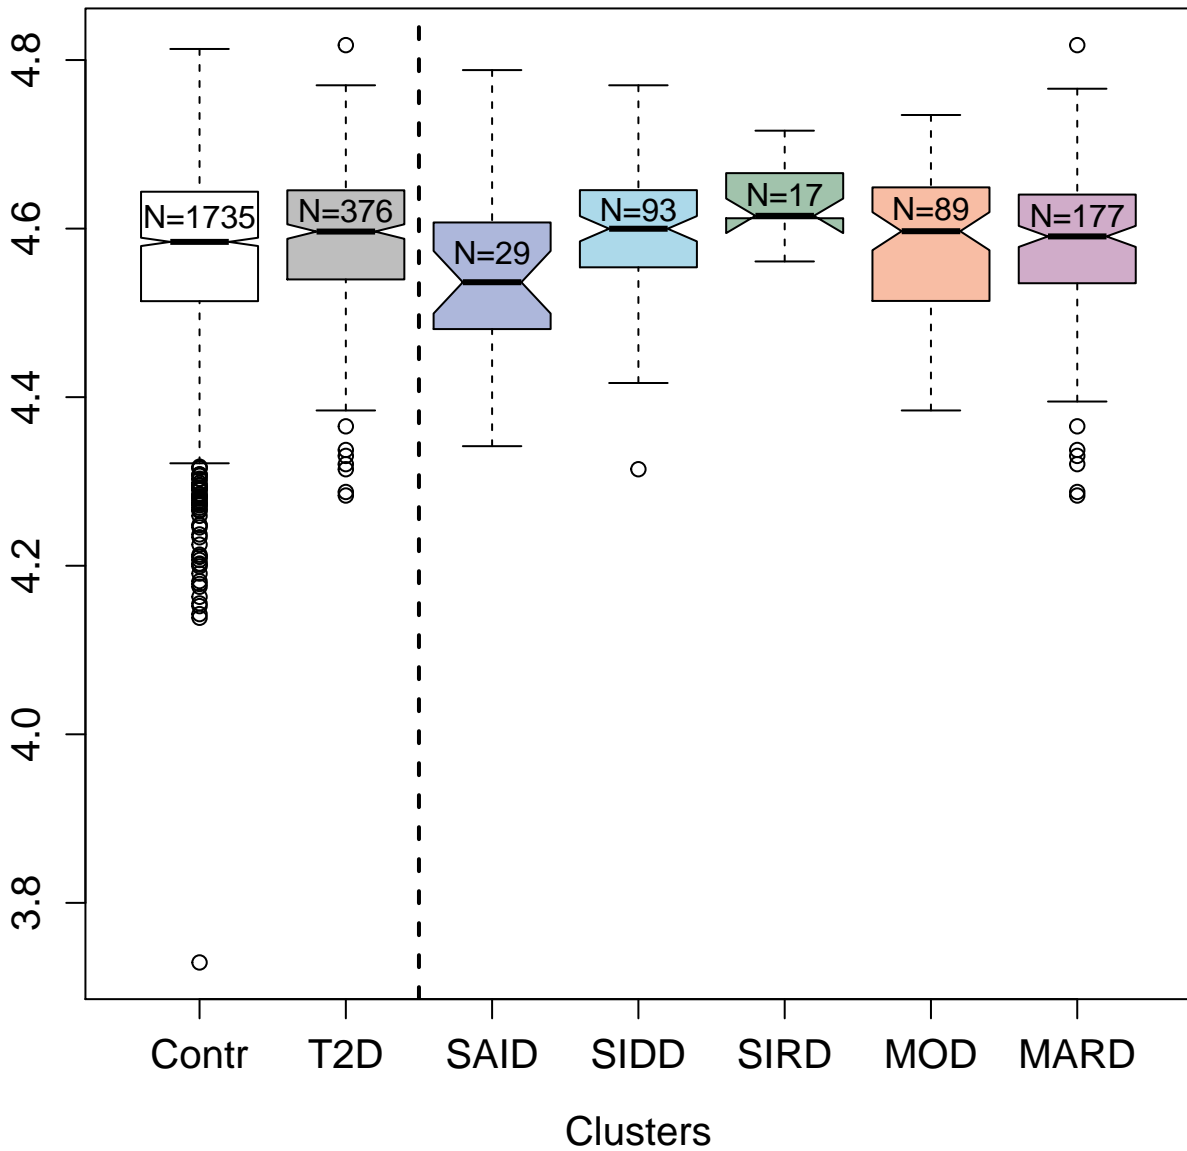

5349-69\_3 : Delta-like protein 1

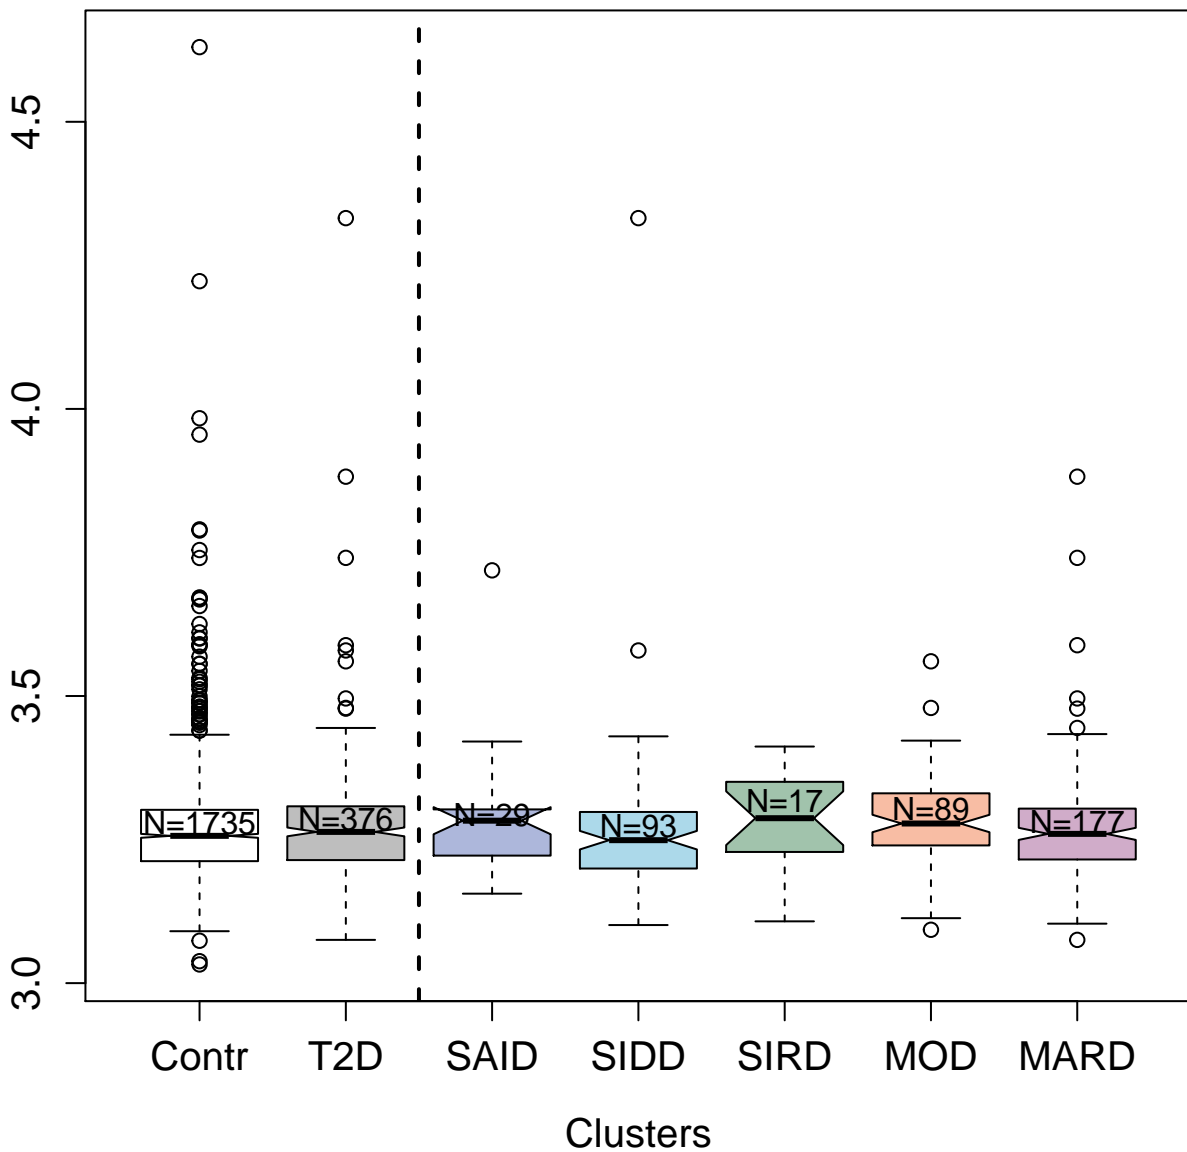

2603-61\_2 : T-lymphocyte activation antigen CD80

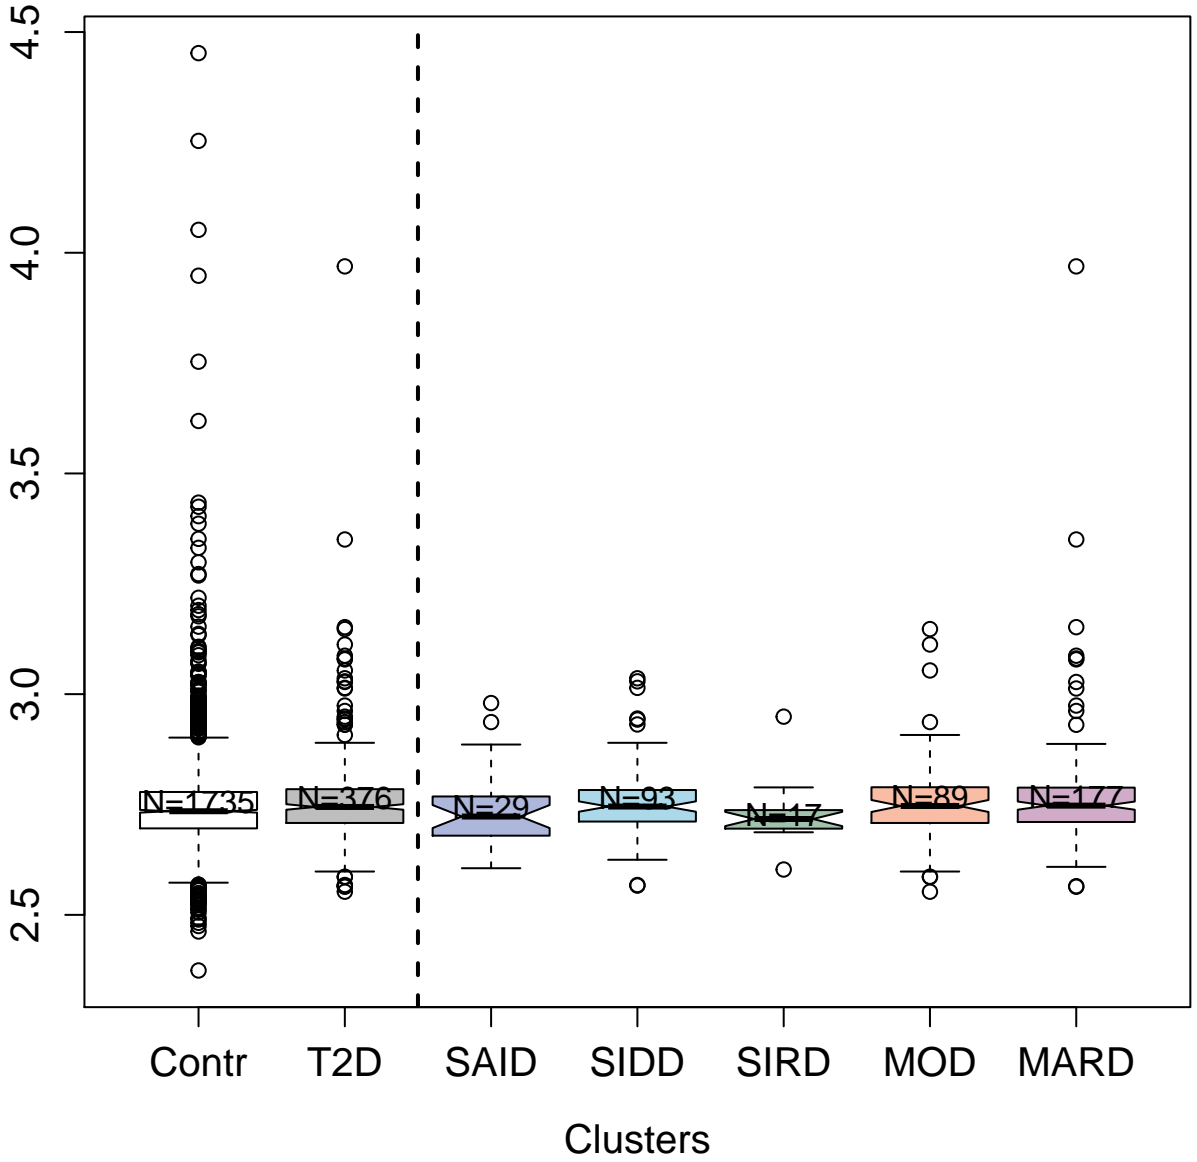



13090-17\_3 : Protein S100-A6

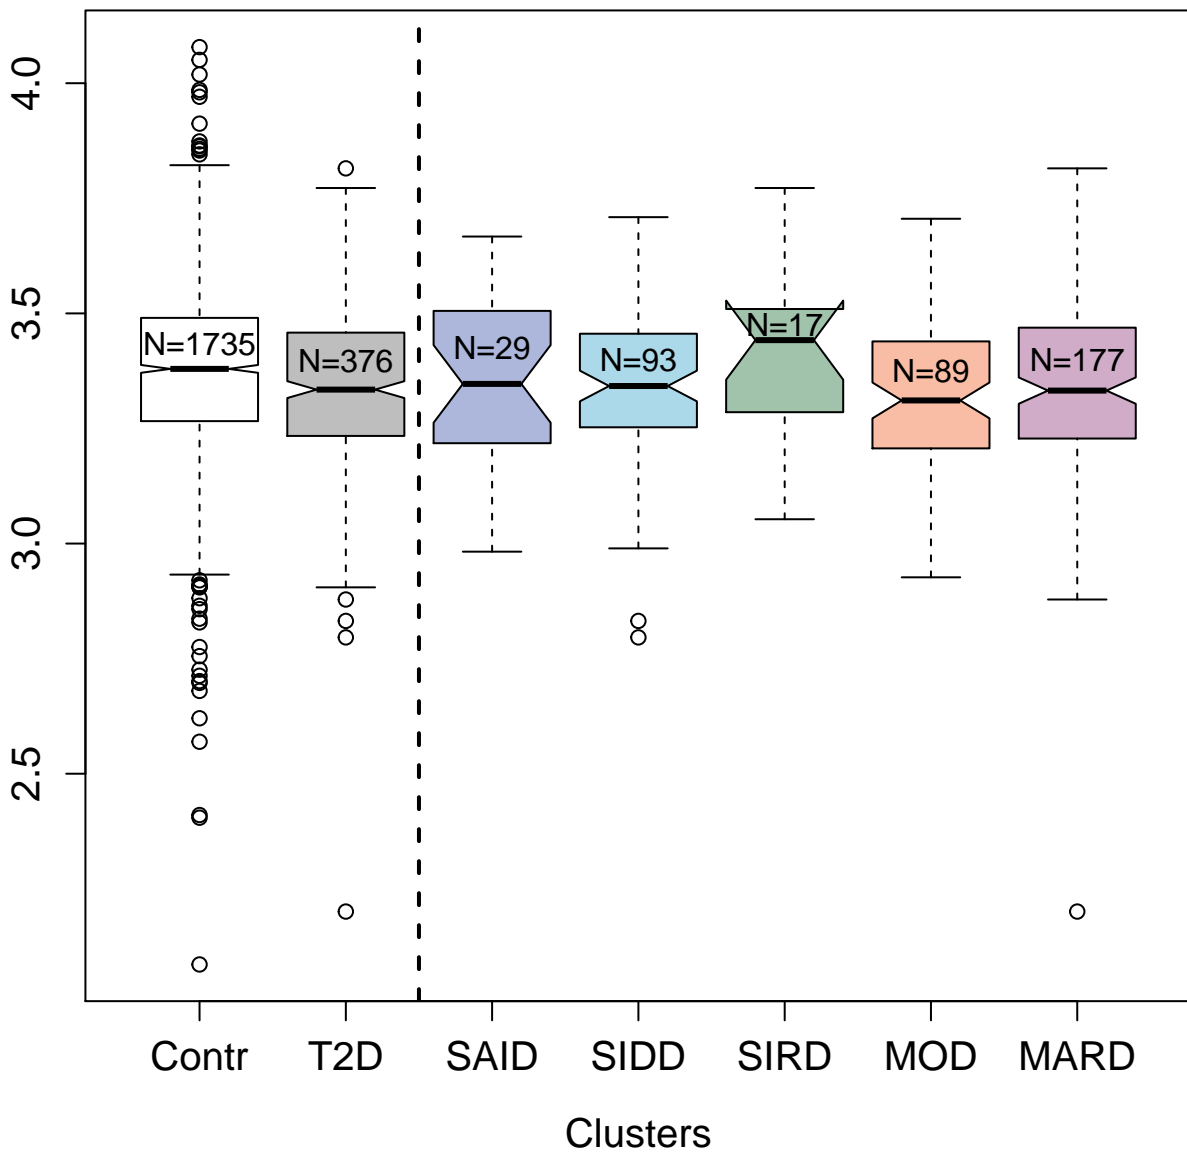

4542-24\_2 : Clusterin

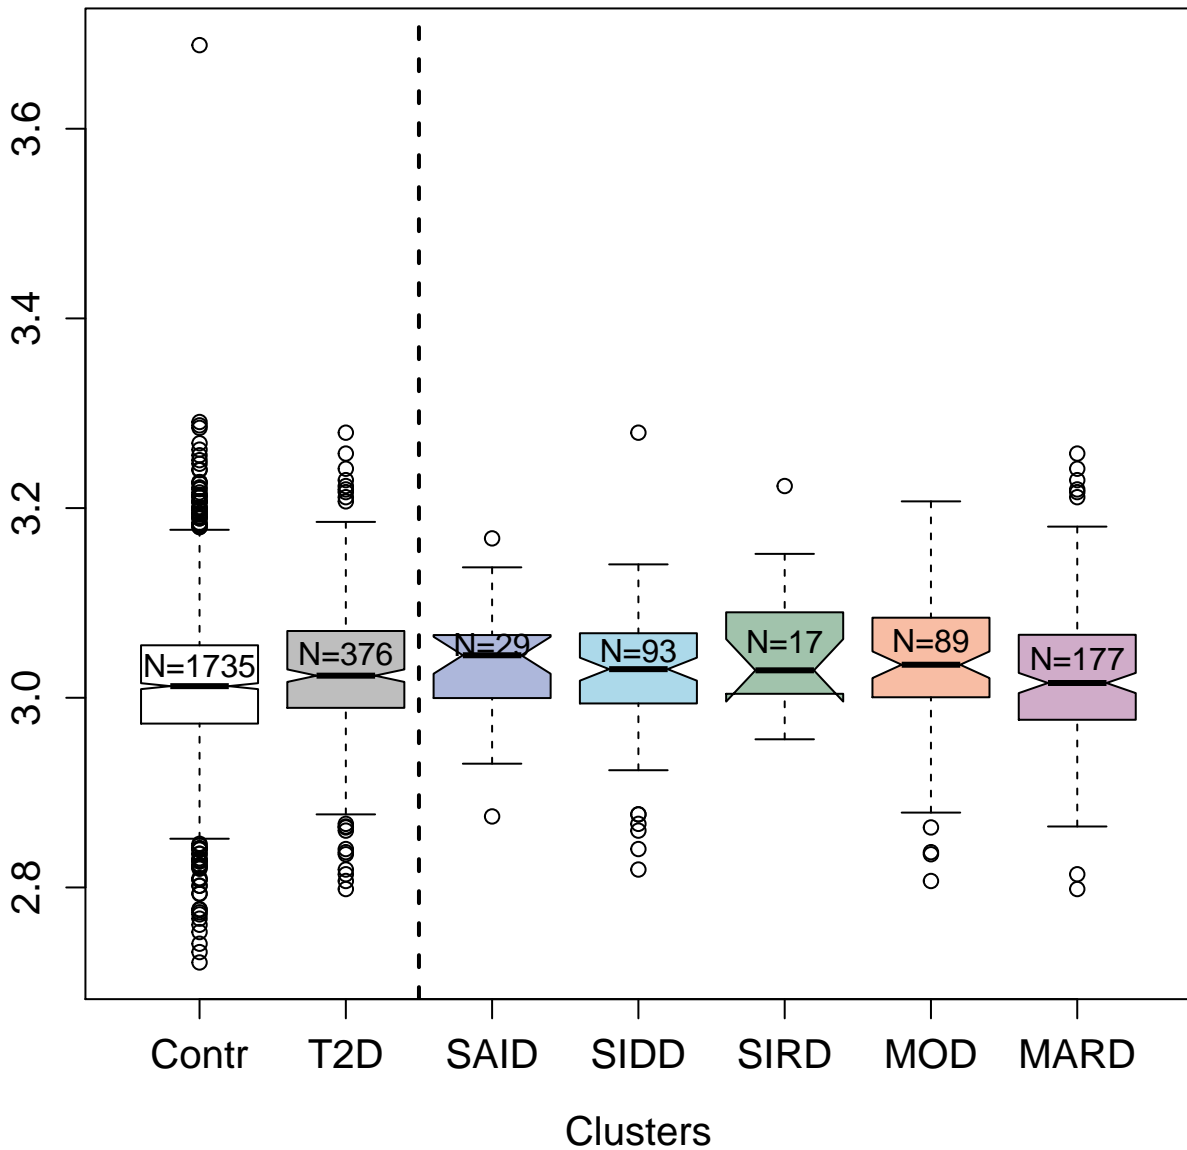

3601-54\_3 : Neural cell adhesion molecule L1-like

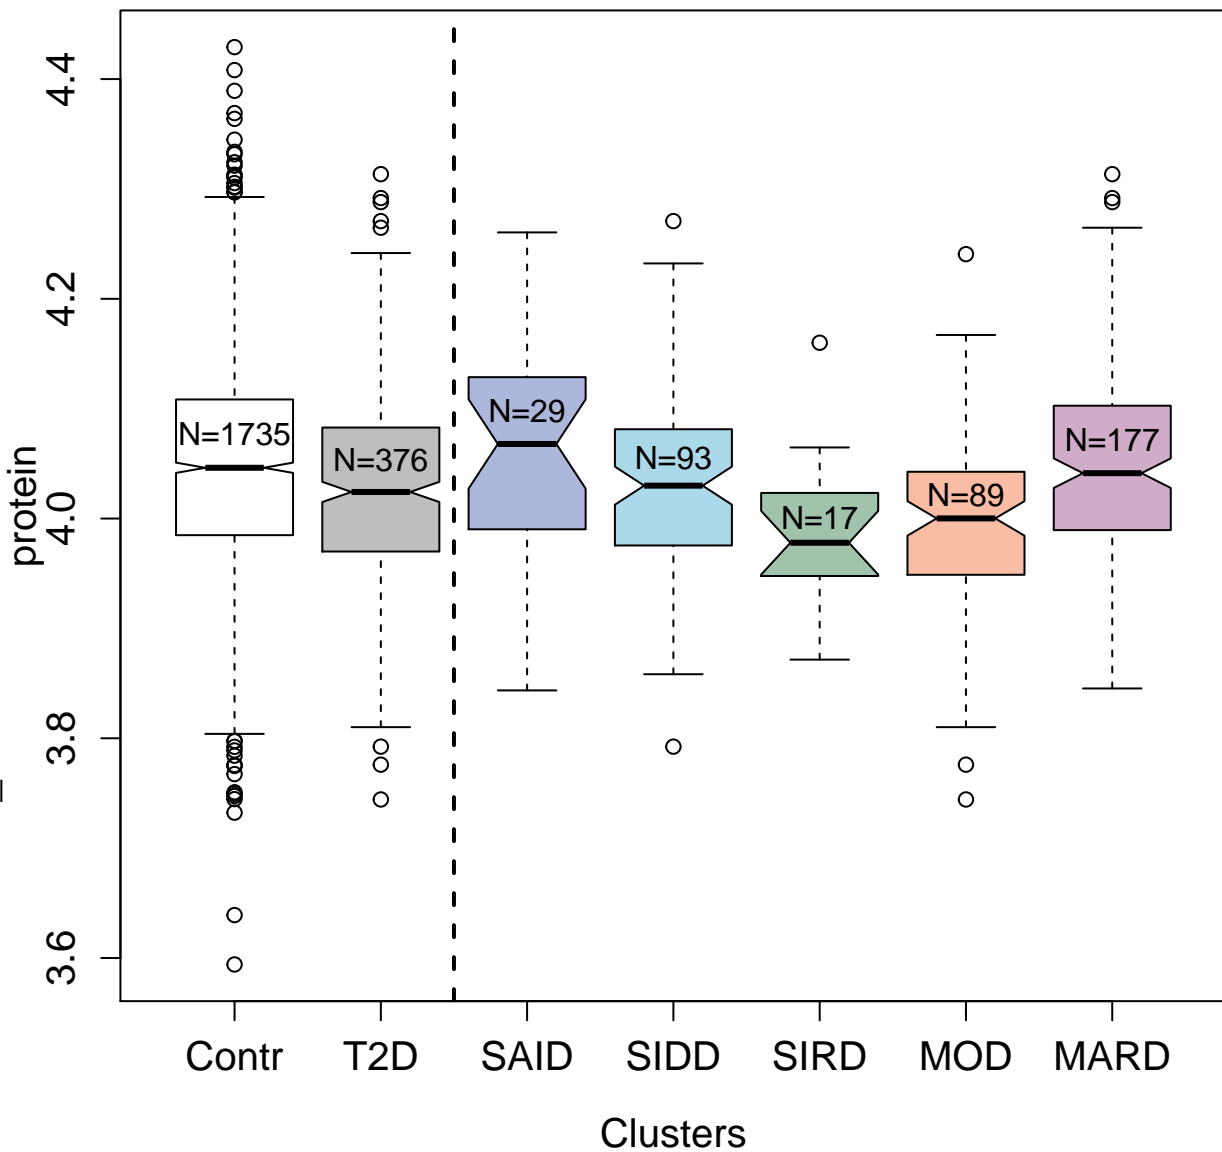

3285-23\_2 : Complement C1r subcomponent

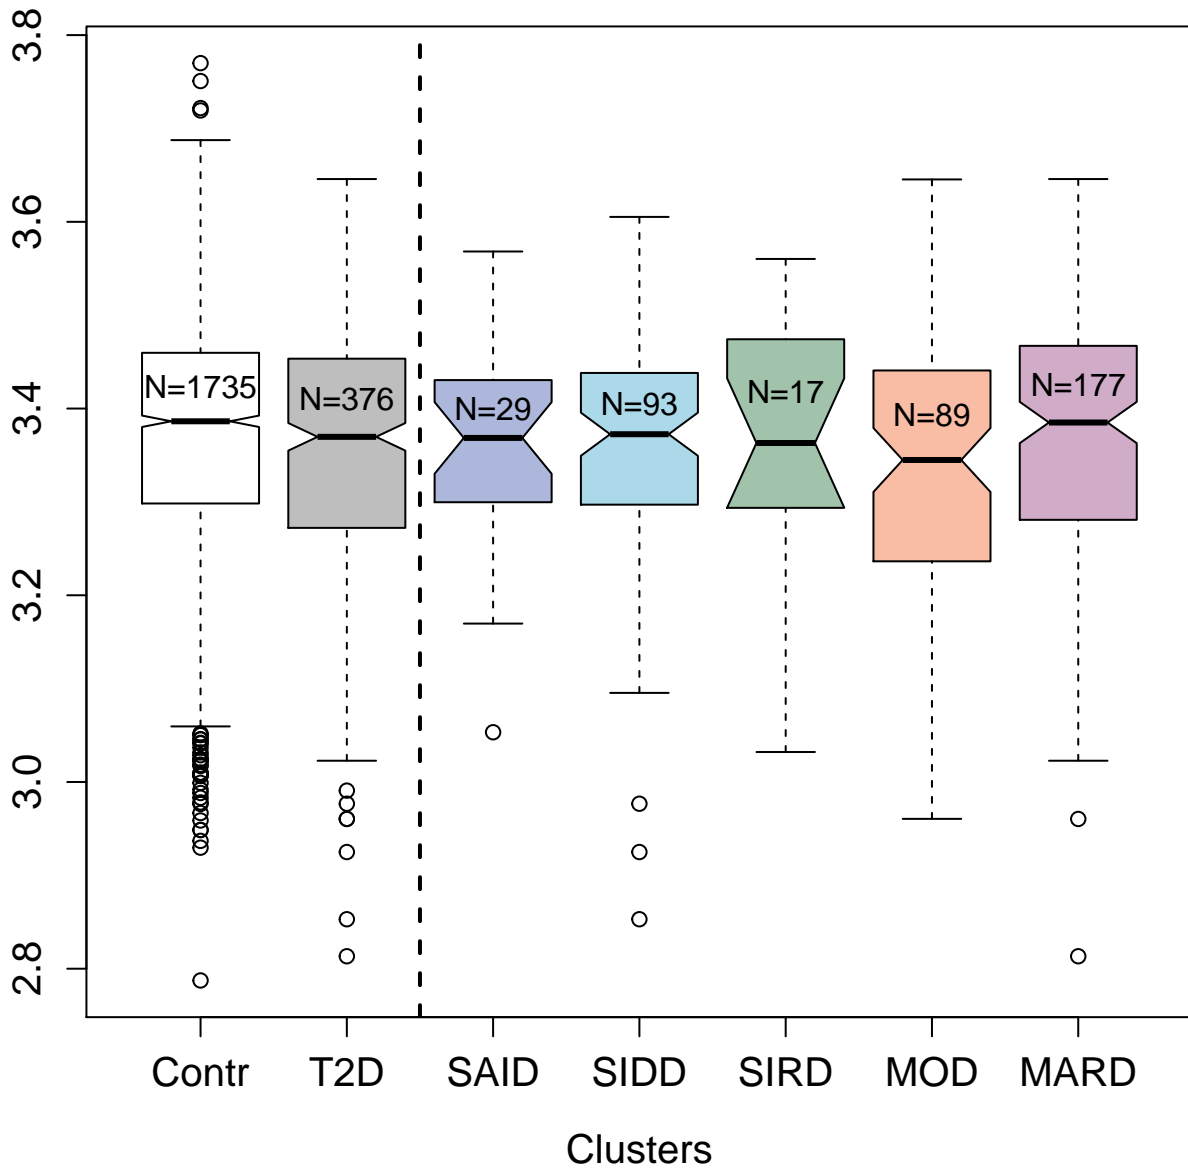

5236-2\_3 : Nuclear receptor subfamily 1 group D member 1

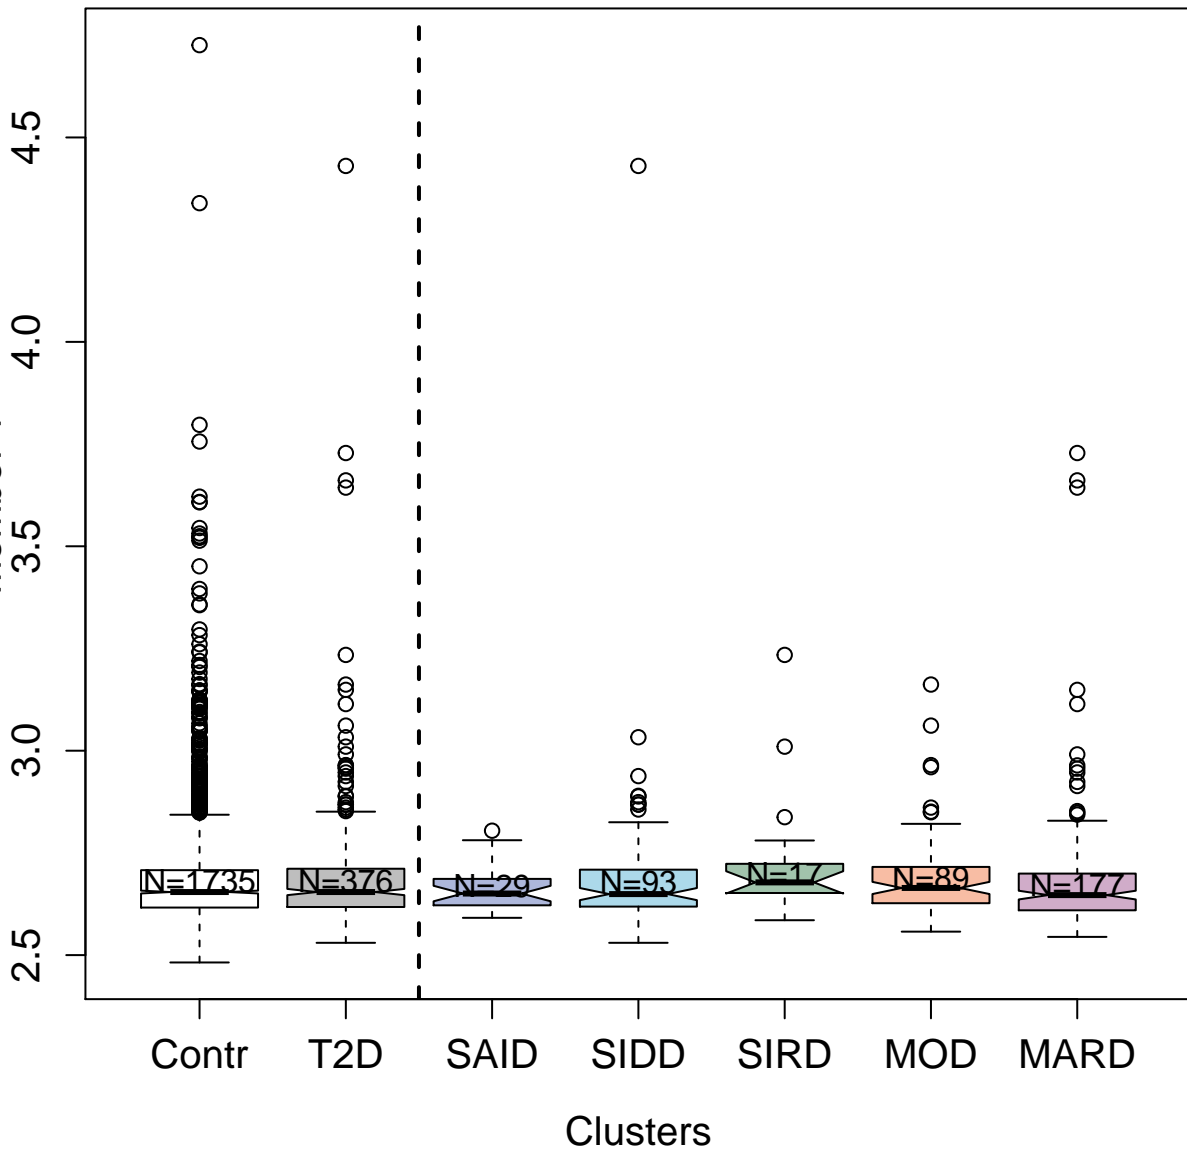

3336-50\_1 : Tissue factor pathway inhibitor

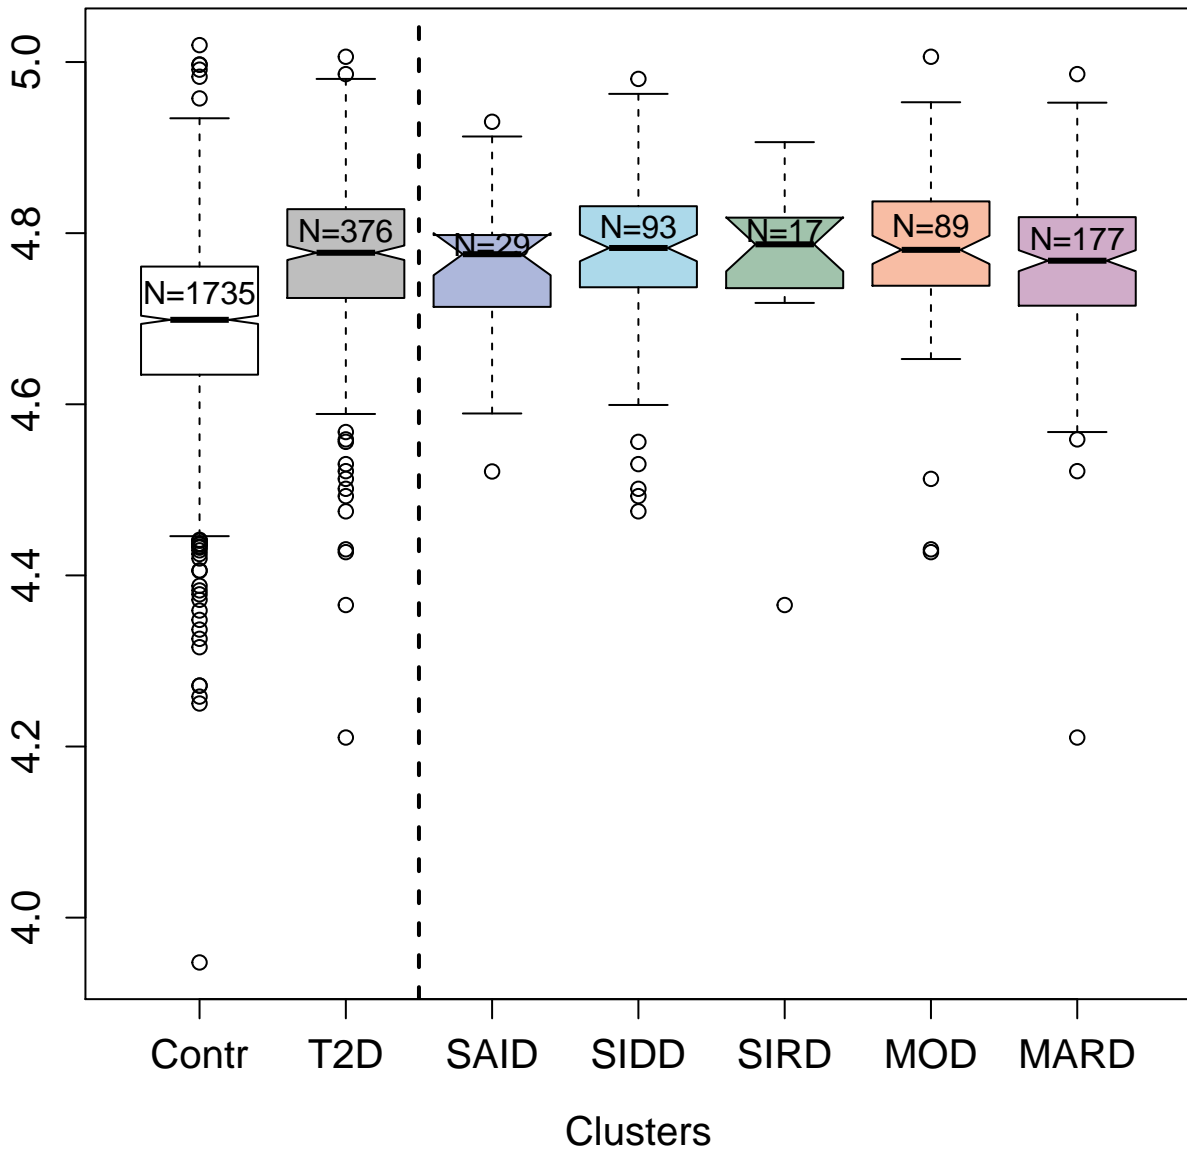

2876-74\_2 : DNA topoisomerase 1

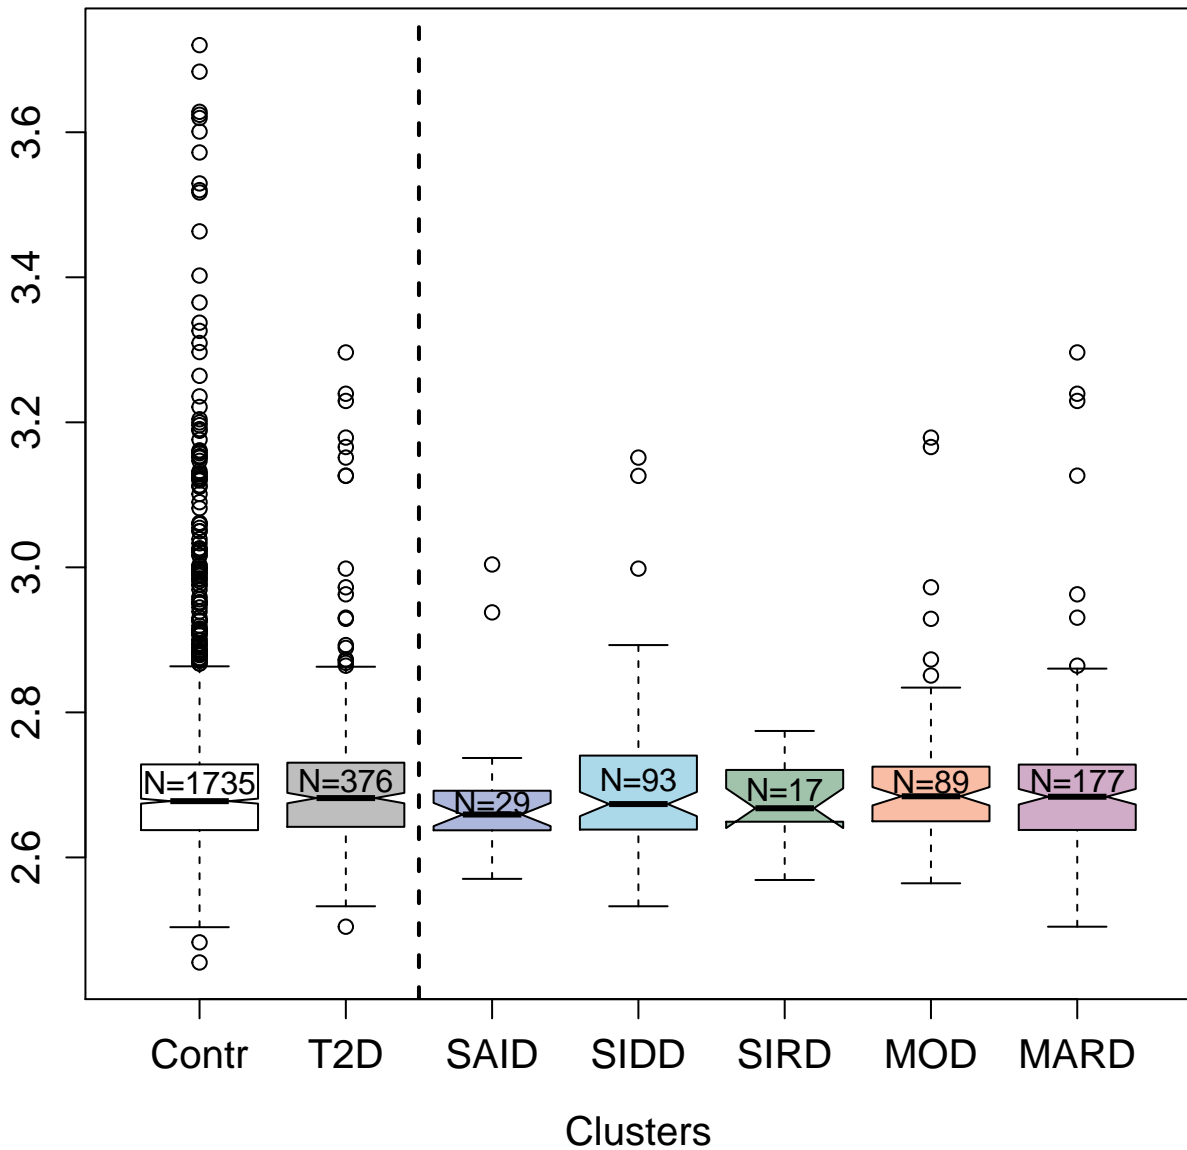

3657-74\_3 : Calcineurin subunit B type 1

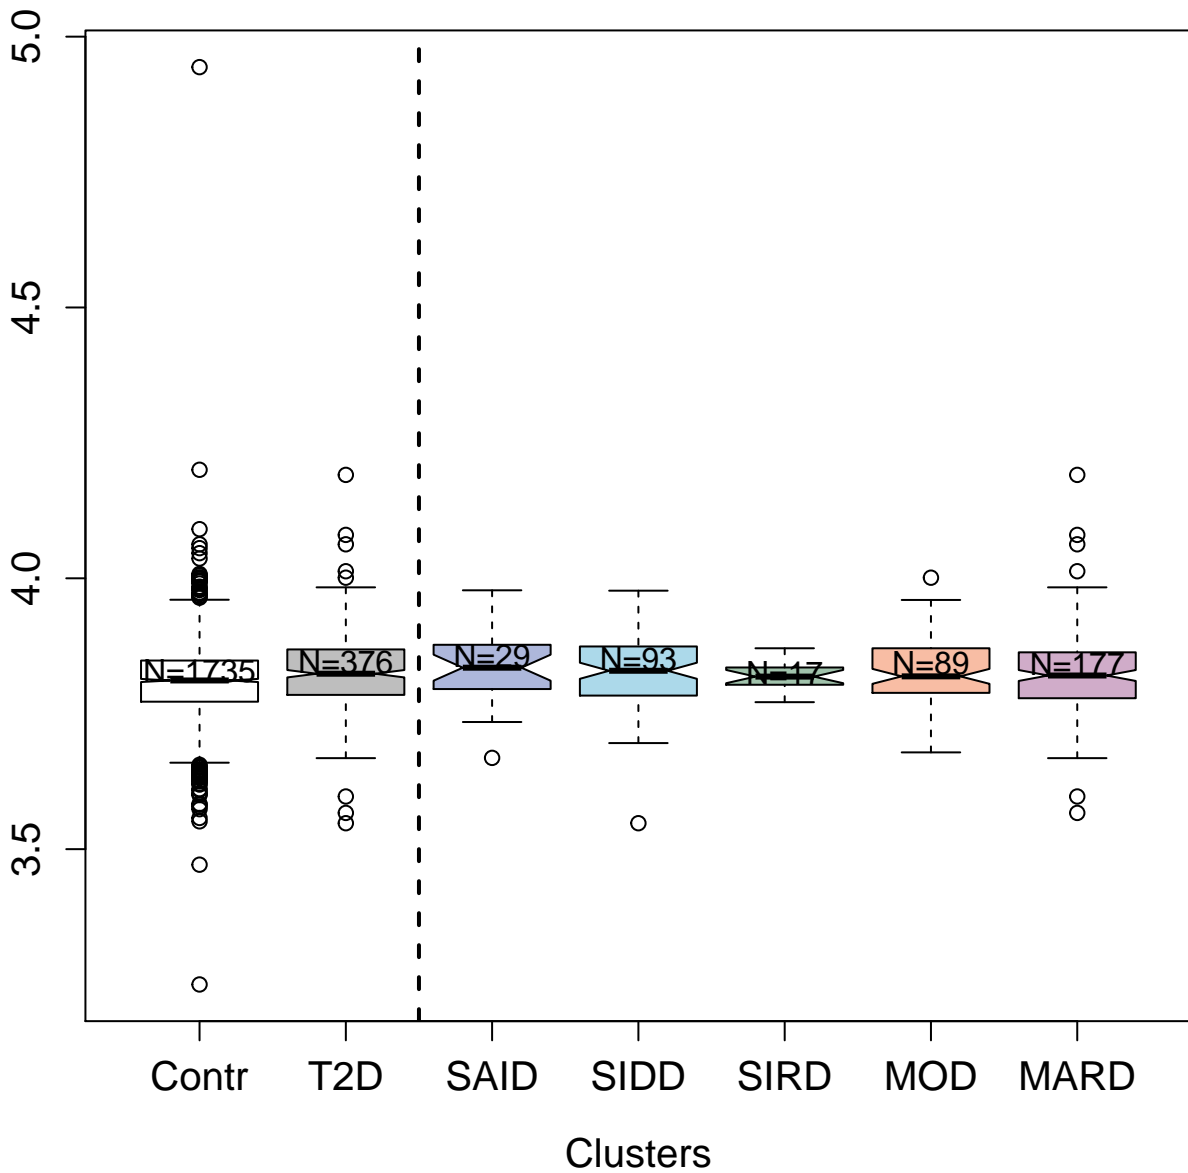



3633-70\_5 : Nidogen-2

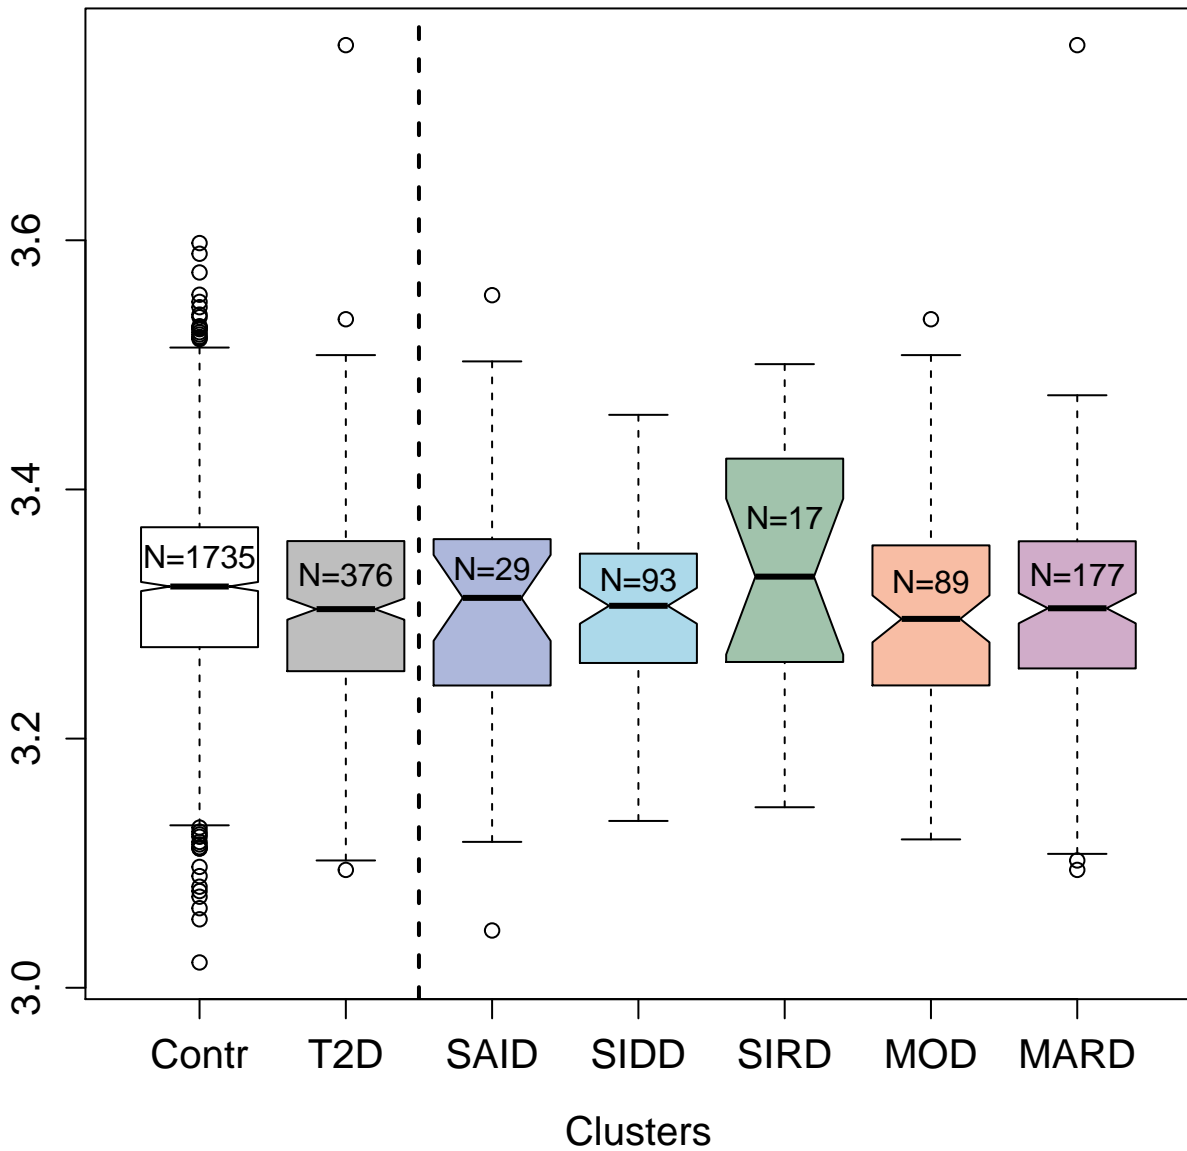

3450-4\_2 : Kallikrein-6

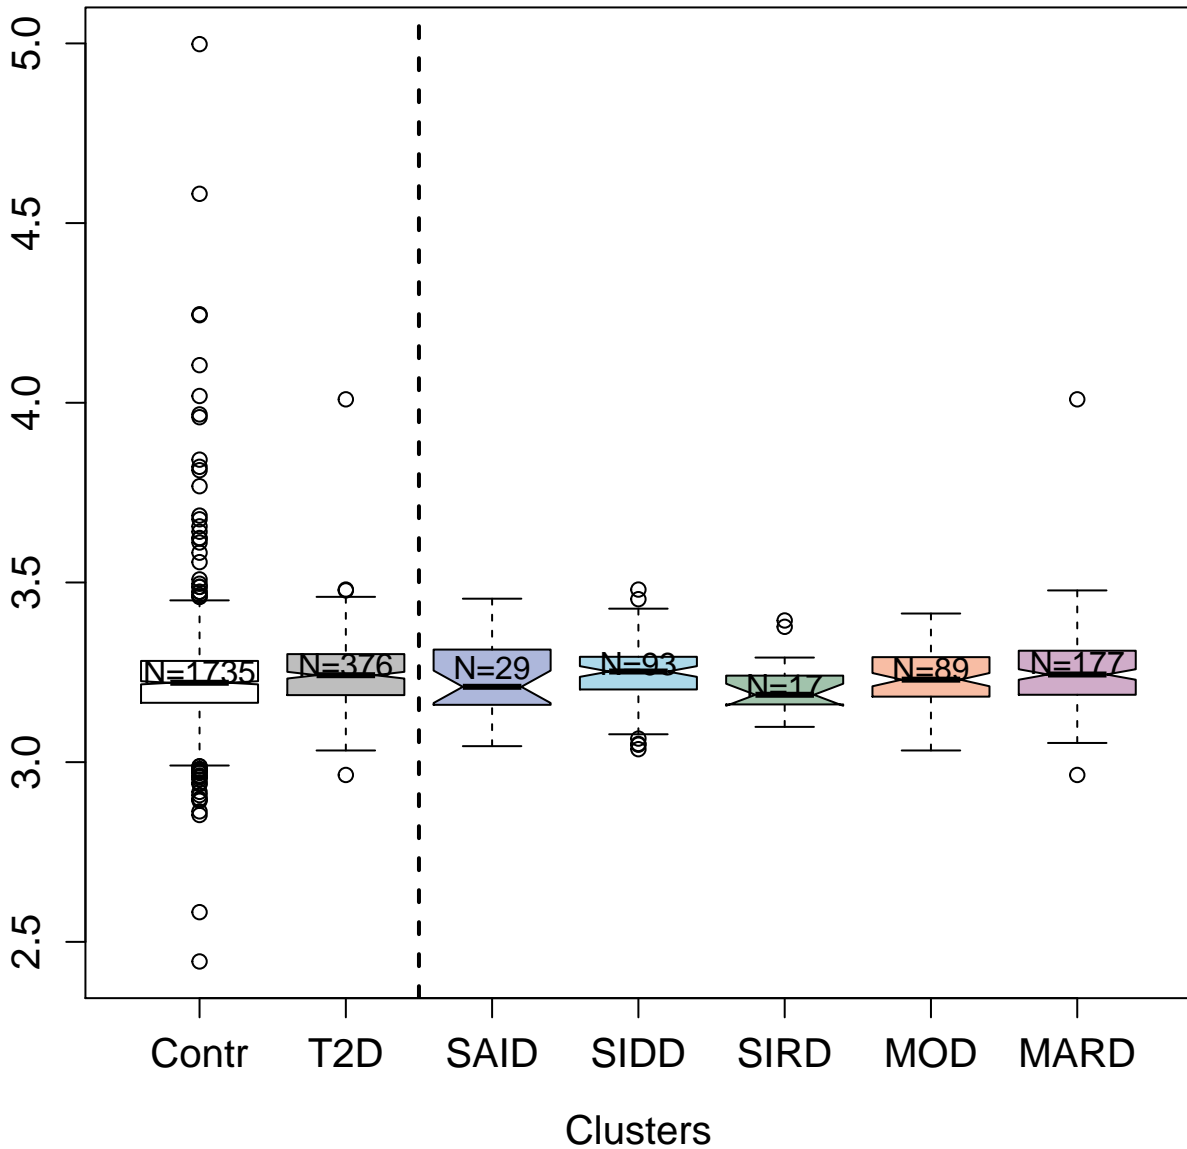

# 5068-54\_3 : Cytotoxic and regulatory T-cell molecule

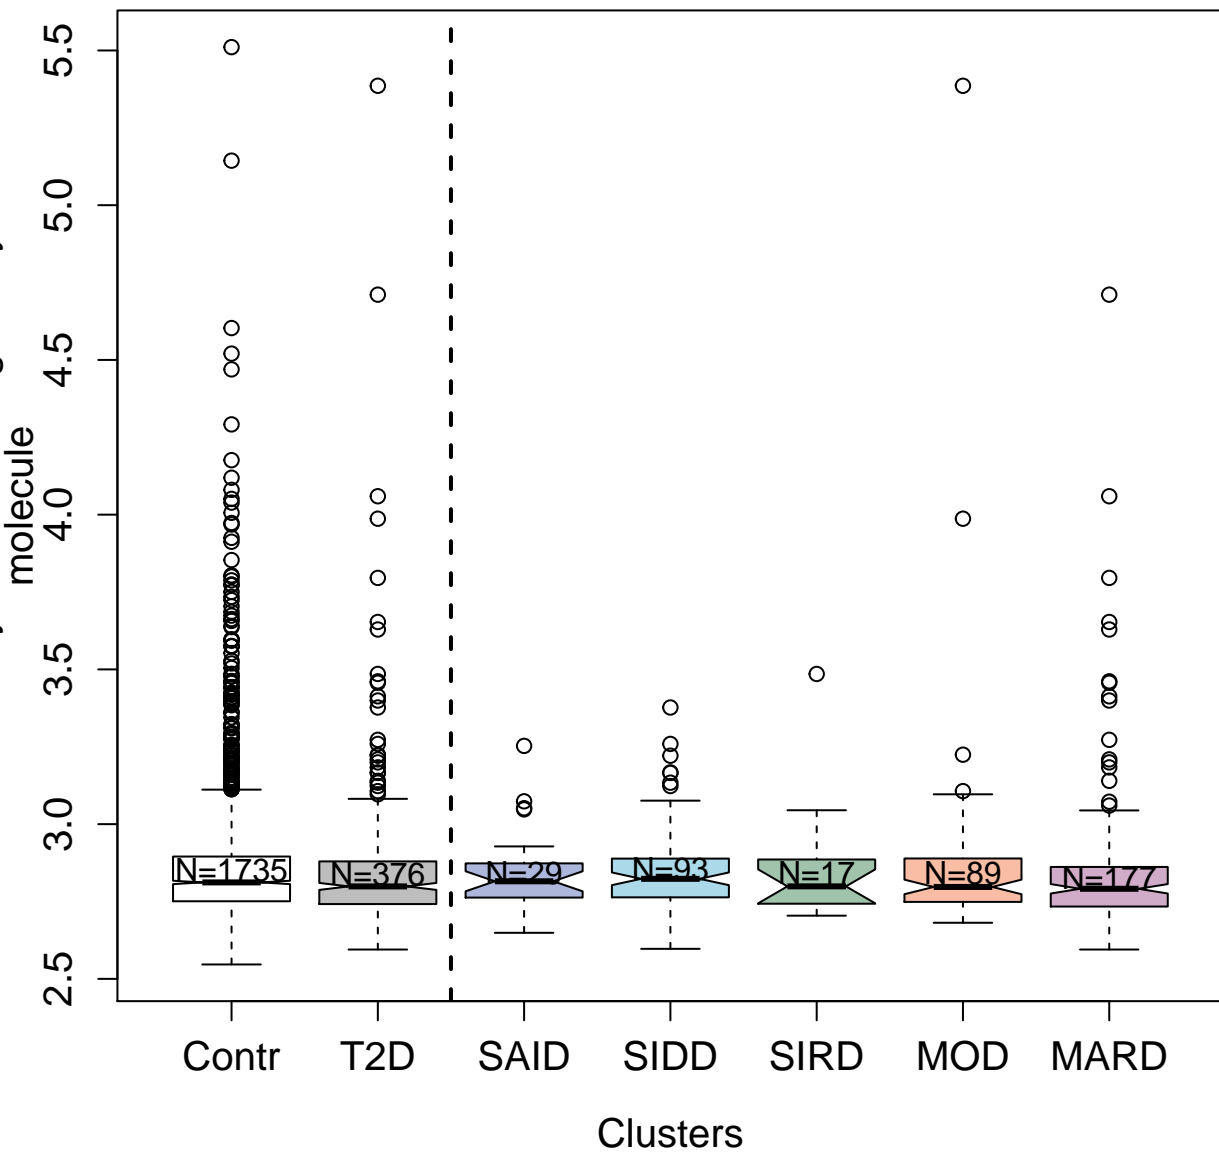

2443-10\_4 : Fibroblast growth factor 8 isoform B

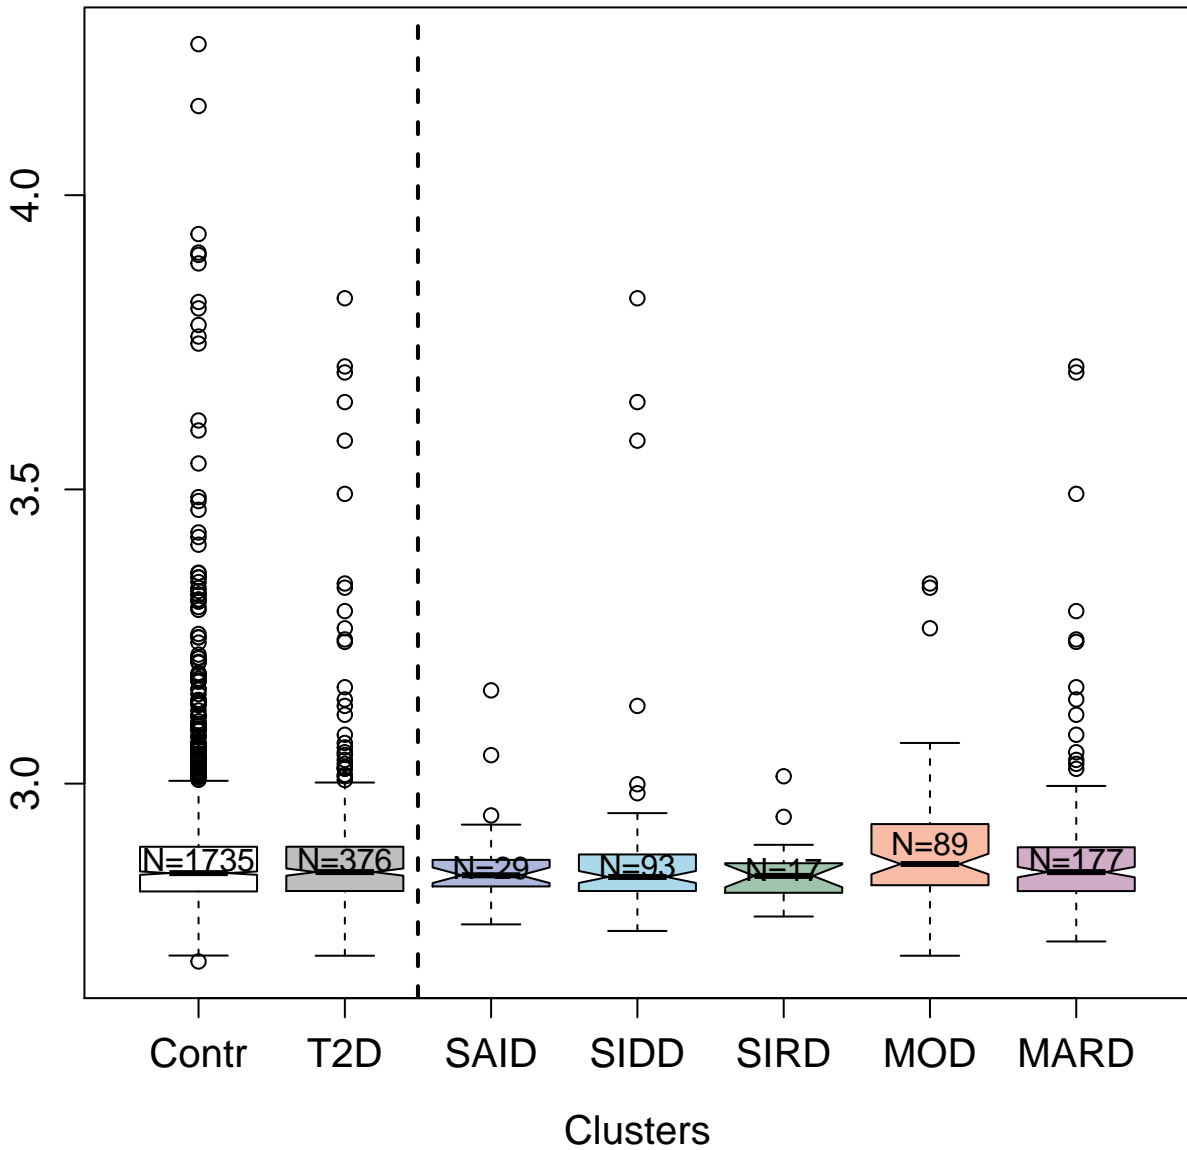

5099-14\_3 : Lymphocyte activation gene 3 protein

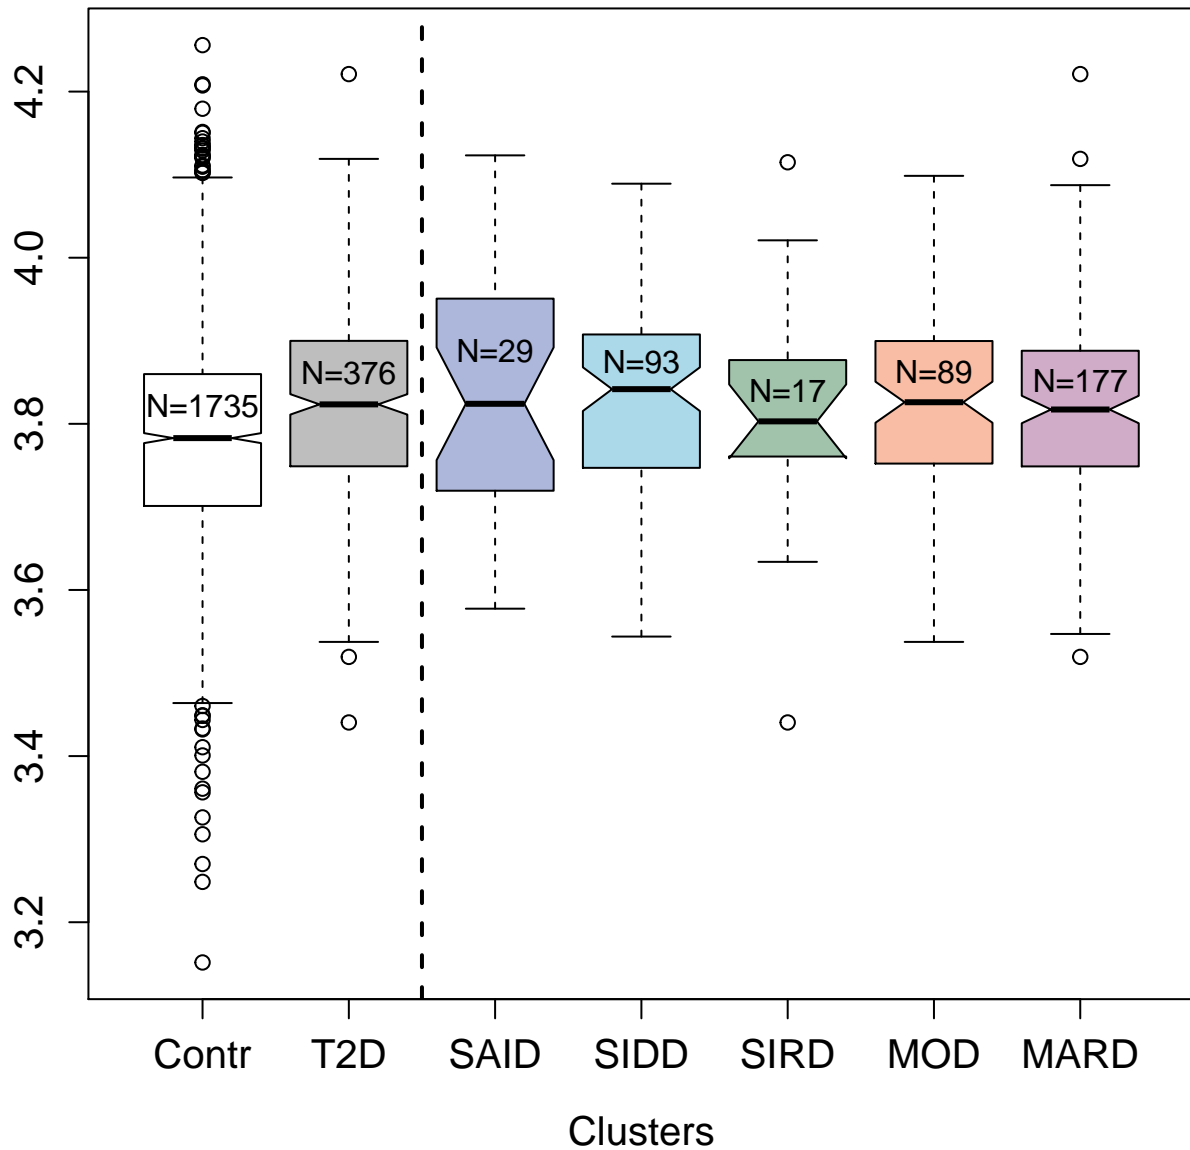

3681-87\_3 : Kallikrein-14

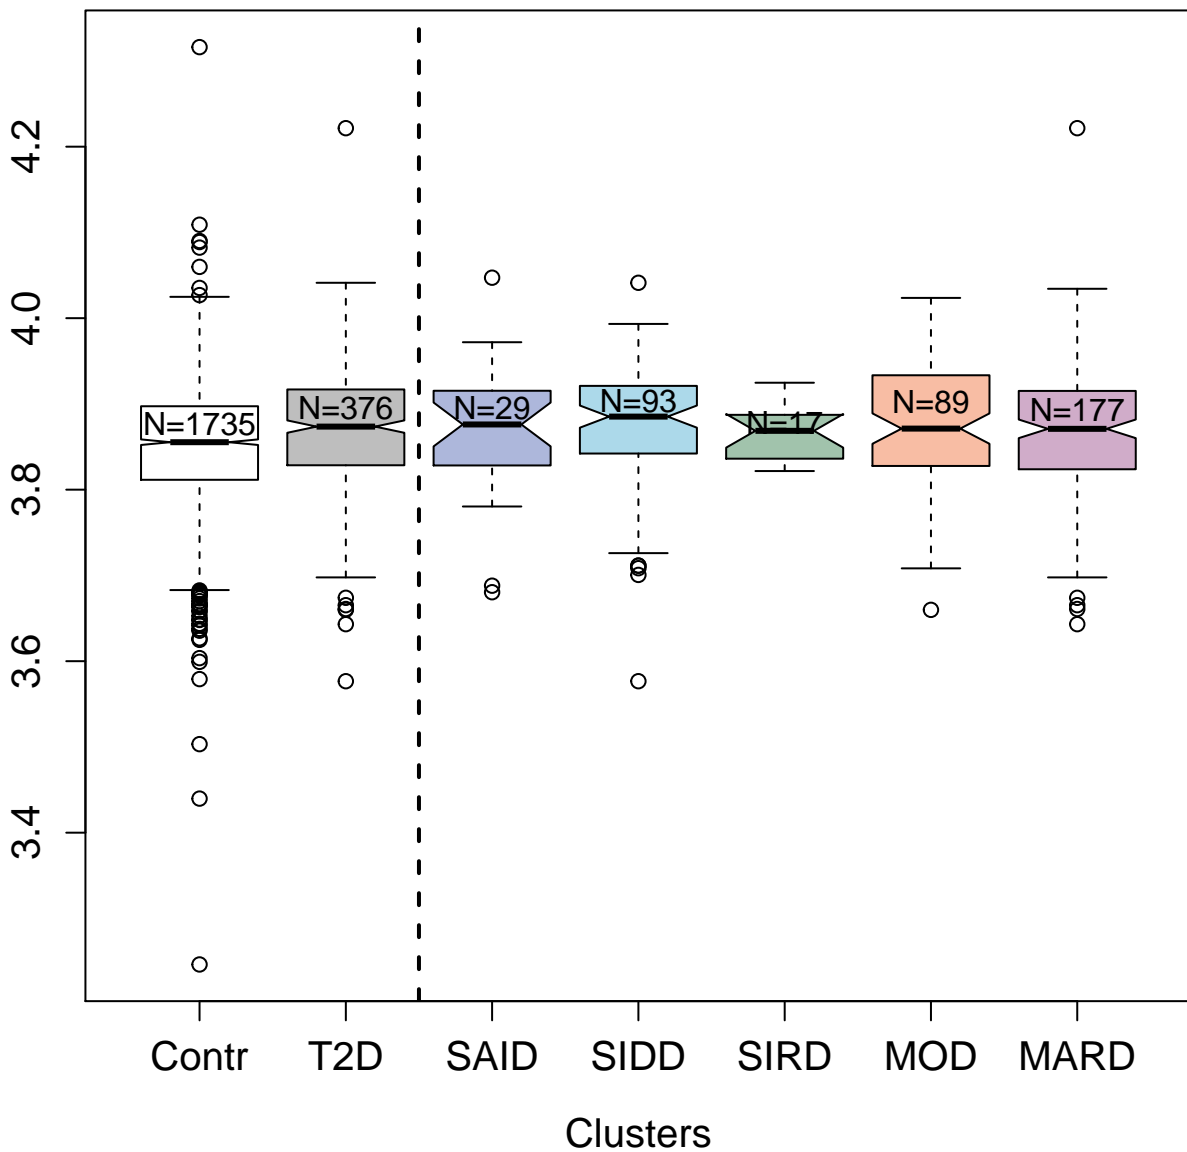

14115-34\_3 : Adrenomedullin

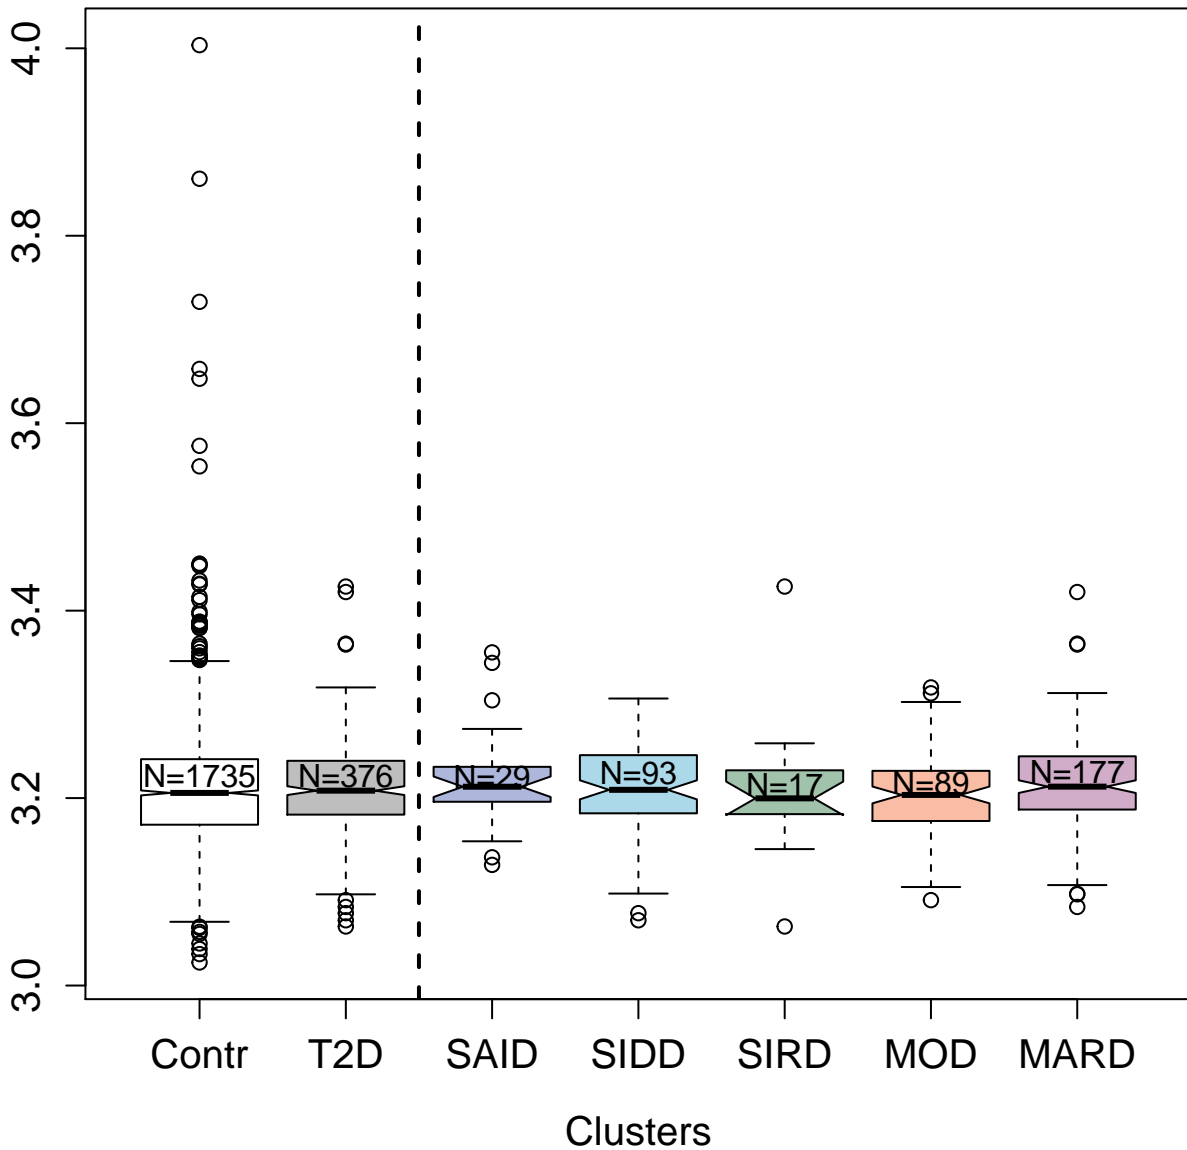

2972-57\_2 : Bone morphogenetic protein 7

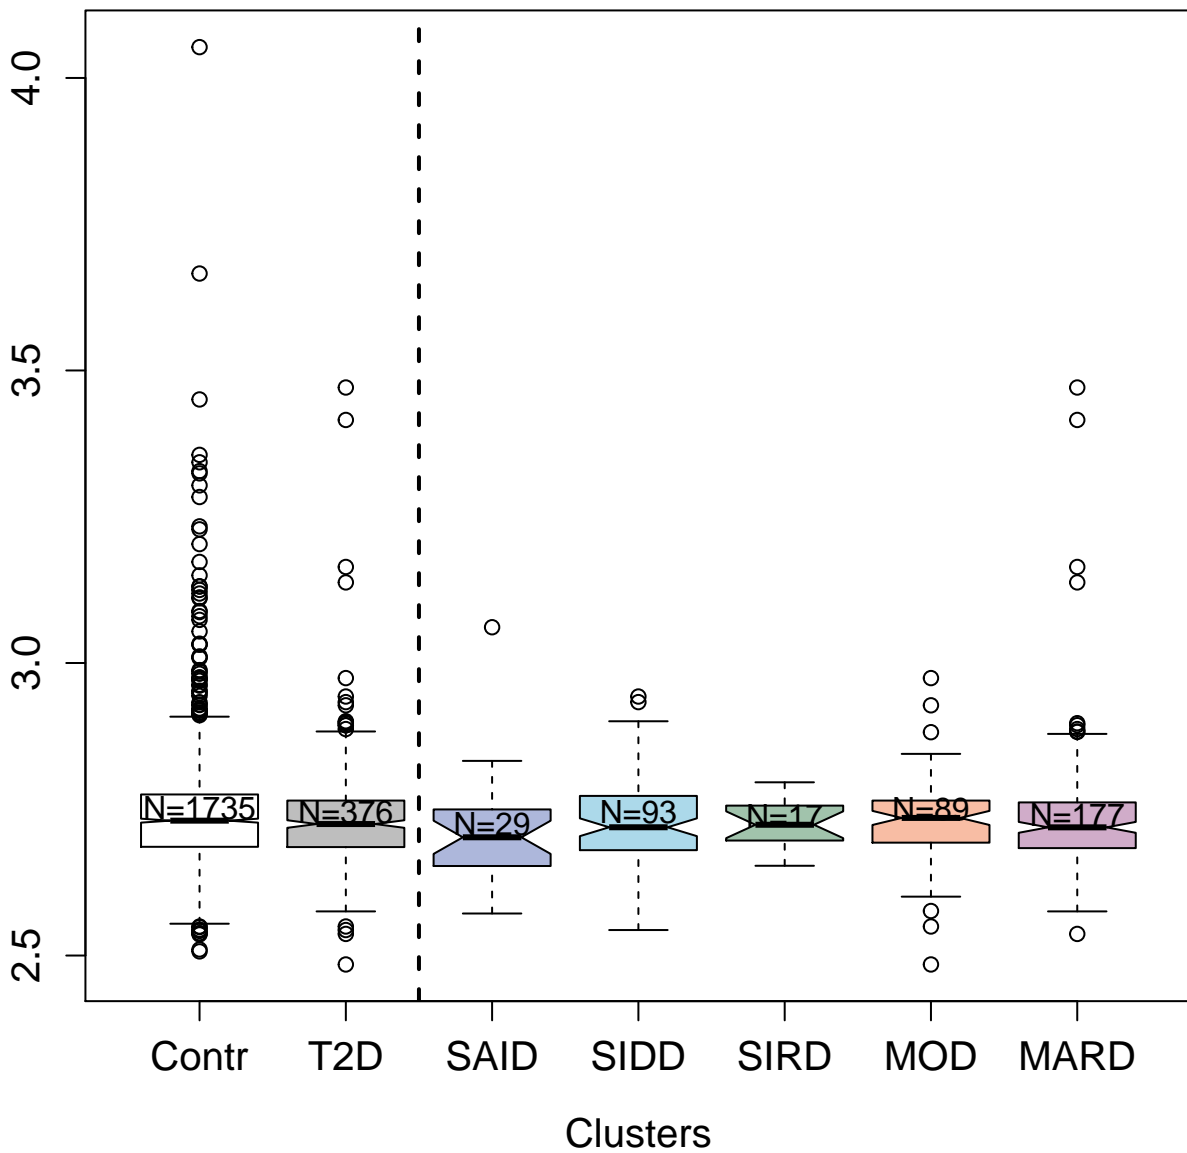



2017-3\_2 : Tumor necrosis factor ligand  
superfamily member 11

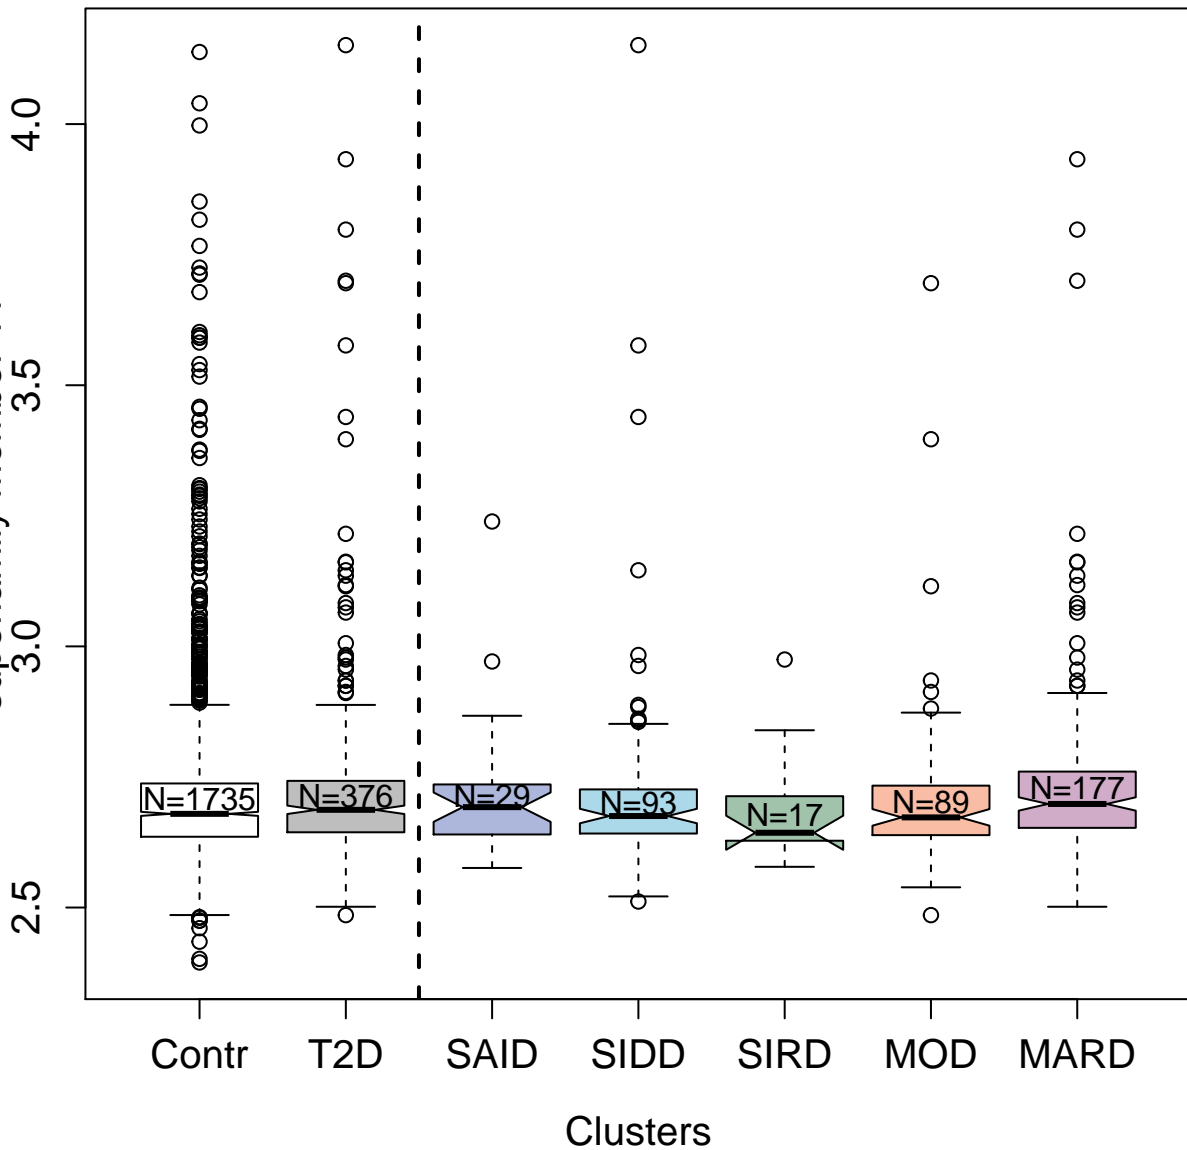

5494-52\_3 : Small nuclear ribonucleoprotein F

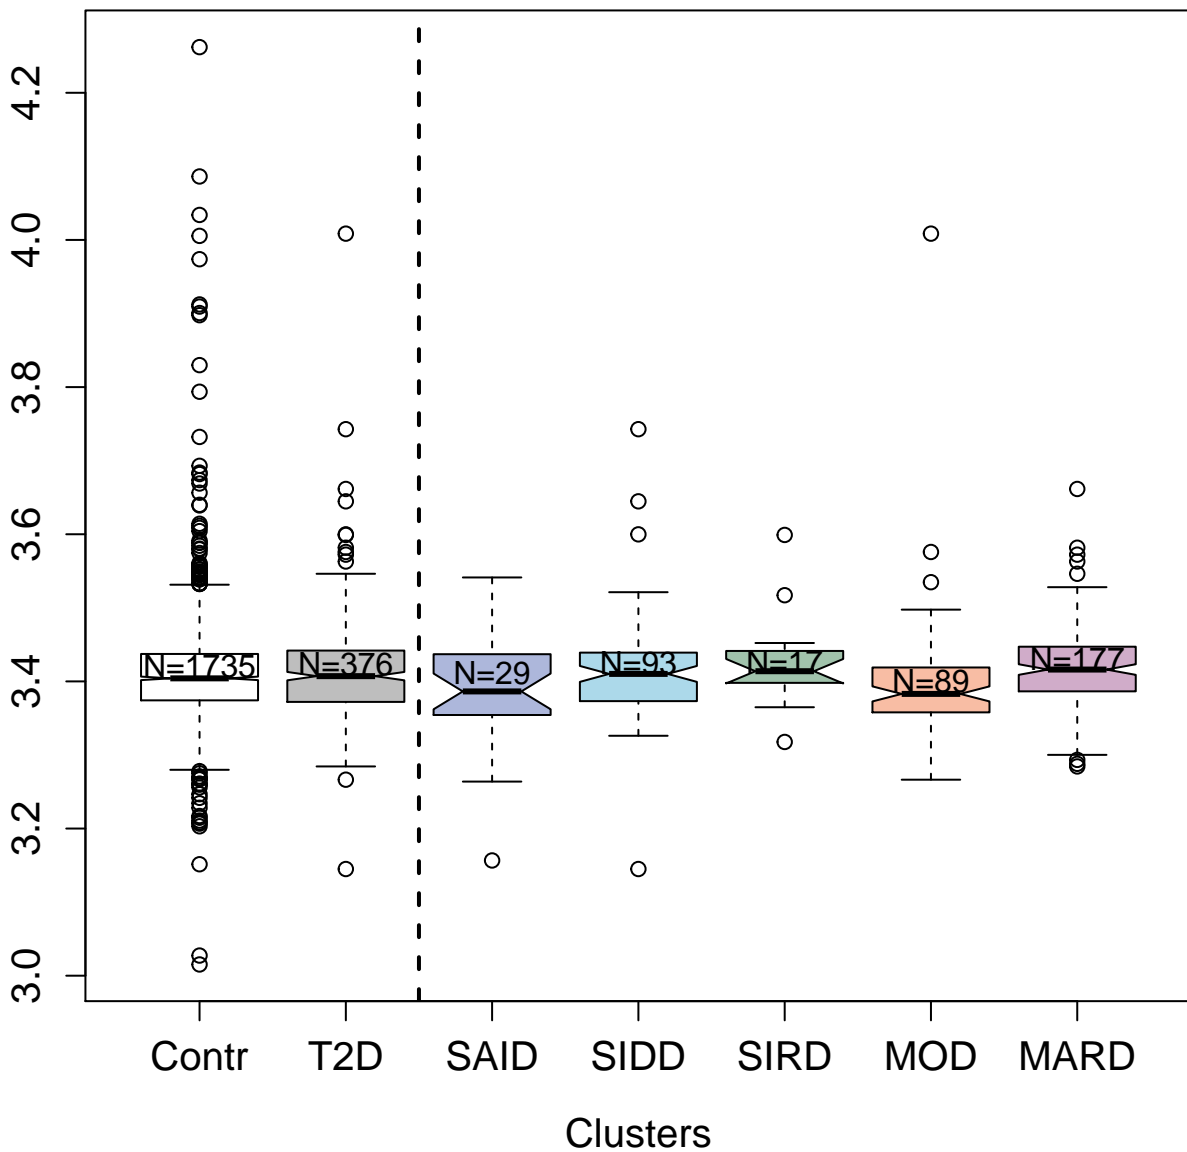

4973-18\_1 : Baculoviral IAP repeat-containing

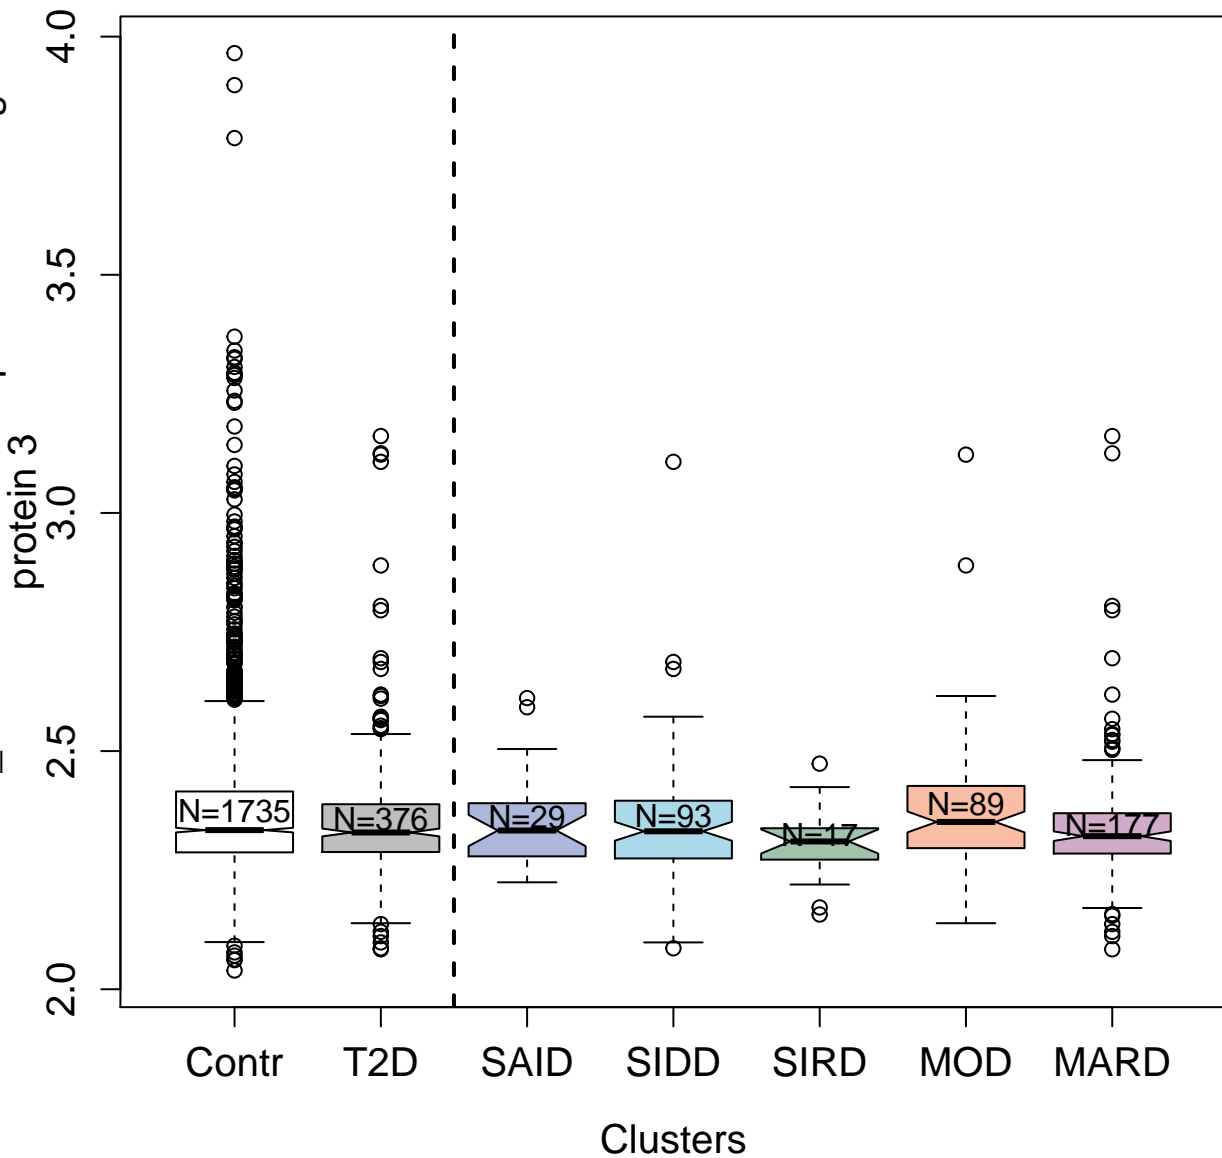

10342-55\_3 : E3 SUMO-protein ligase PIAS4

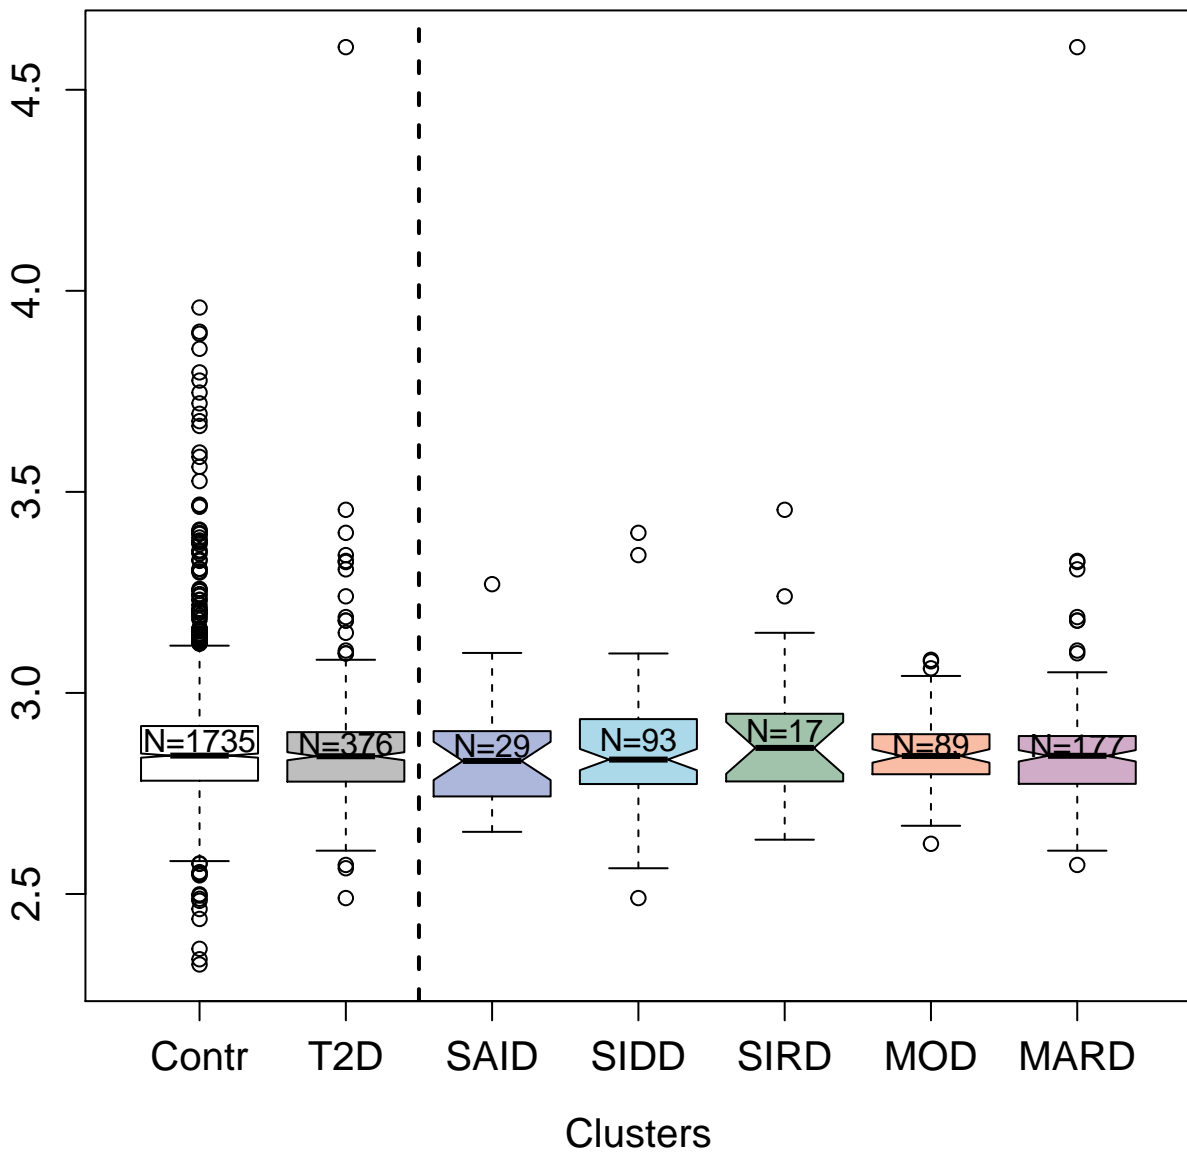

2806-49\_2 : Activin receptor type-1B

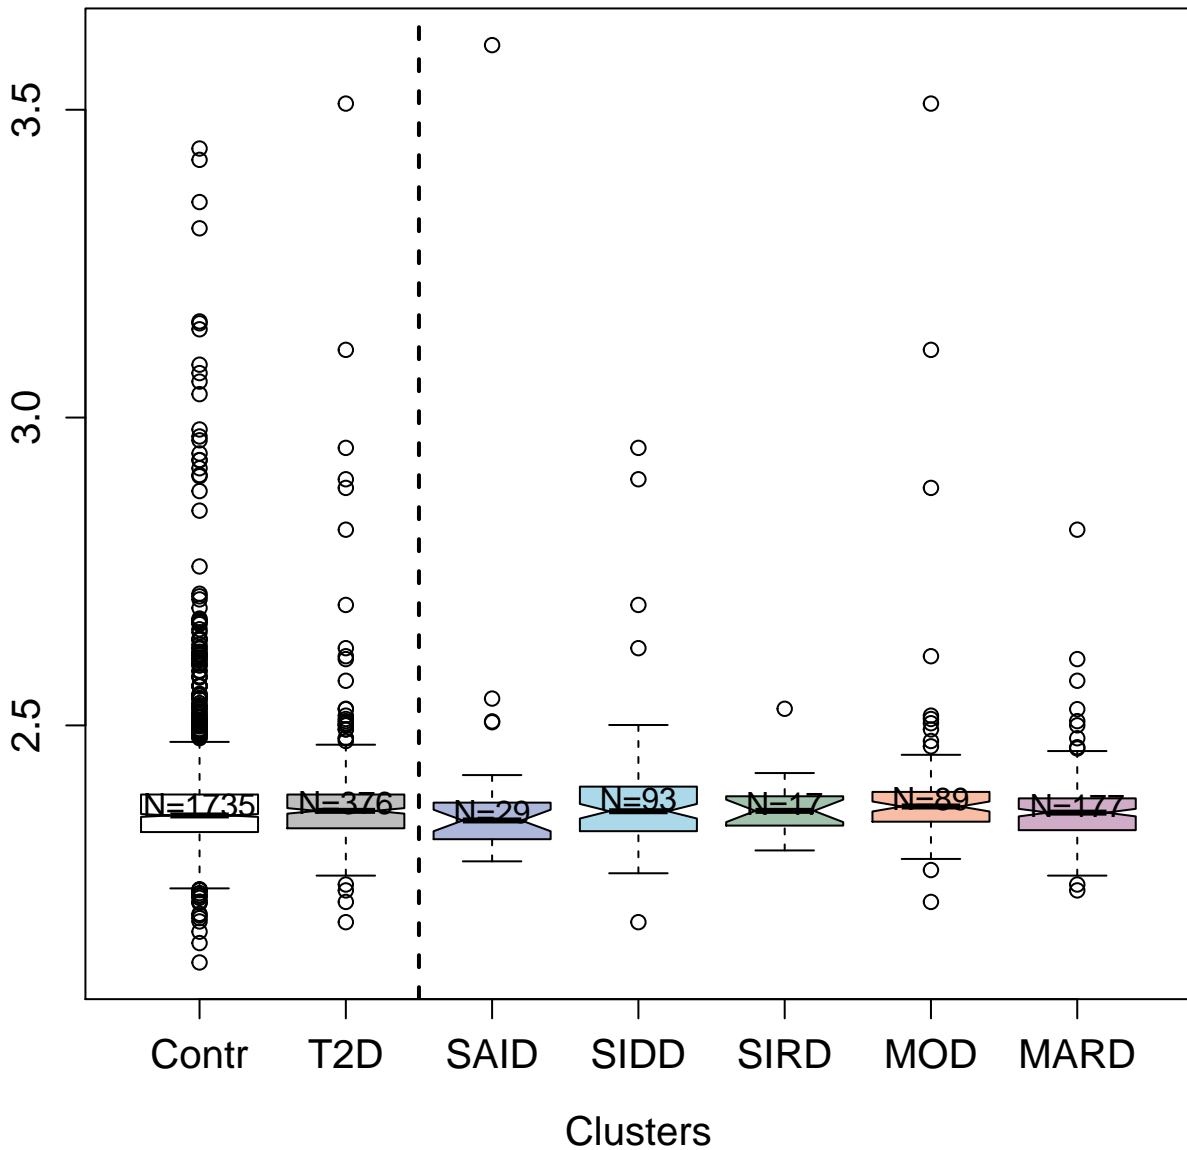

9187-2\_3 : Non-histone chromosomal protein HMG-14

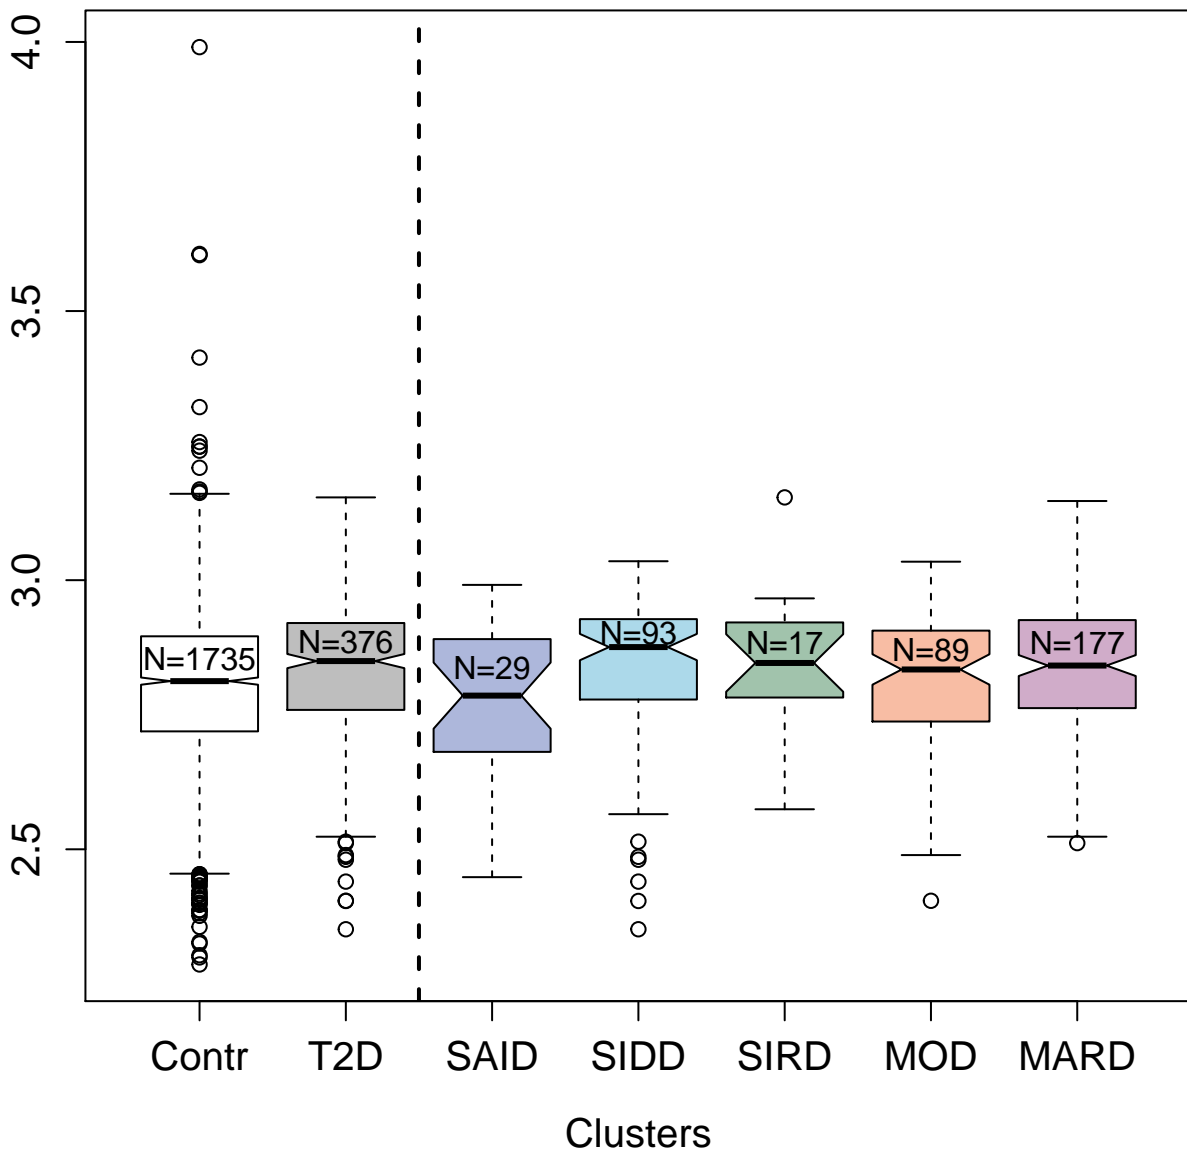

2737-22\_2 : Protein NOV homolog

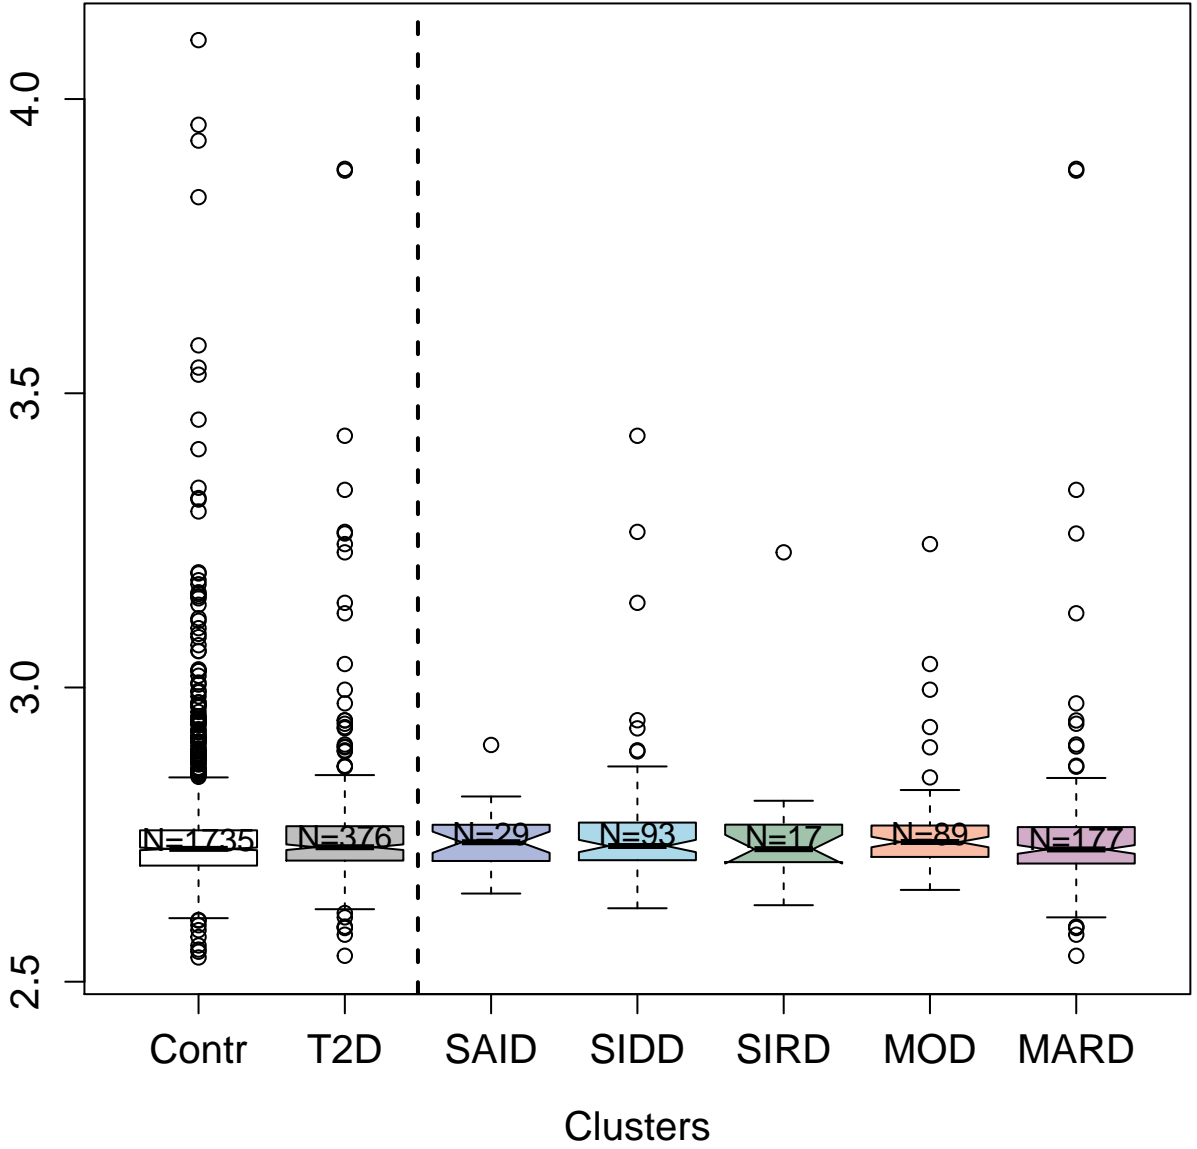

2599-51\_2 : Tumor necrosis factor ligand  
superfamily member 9

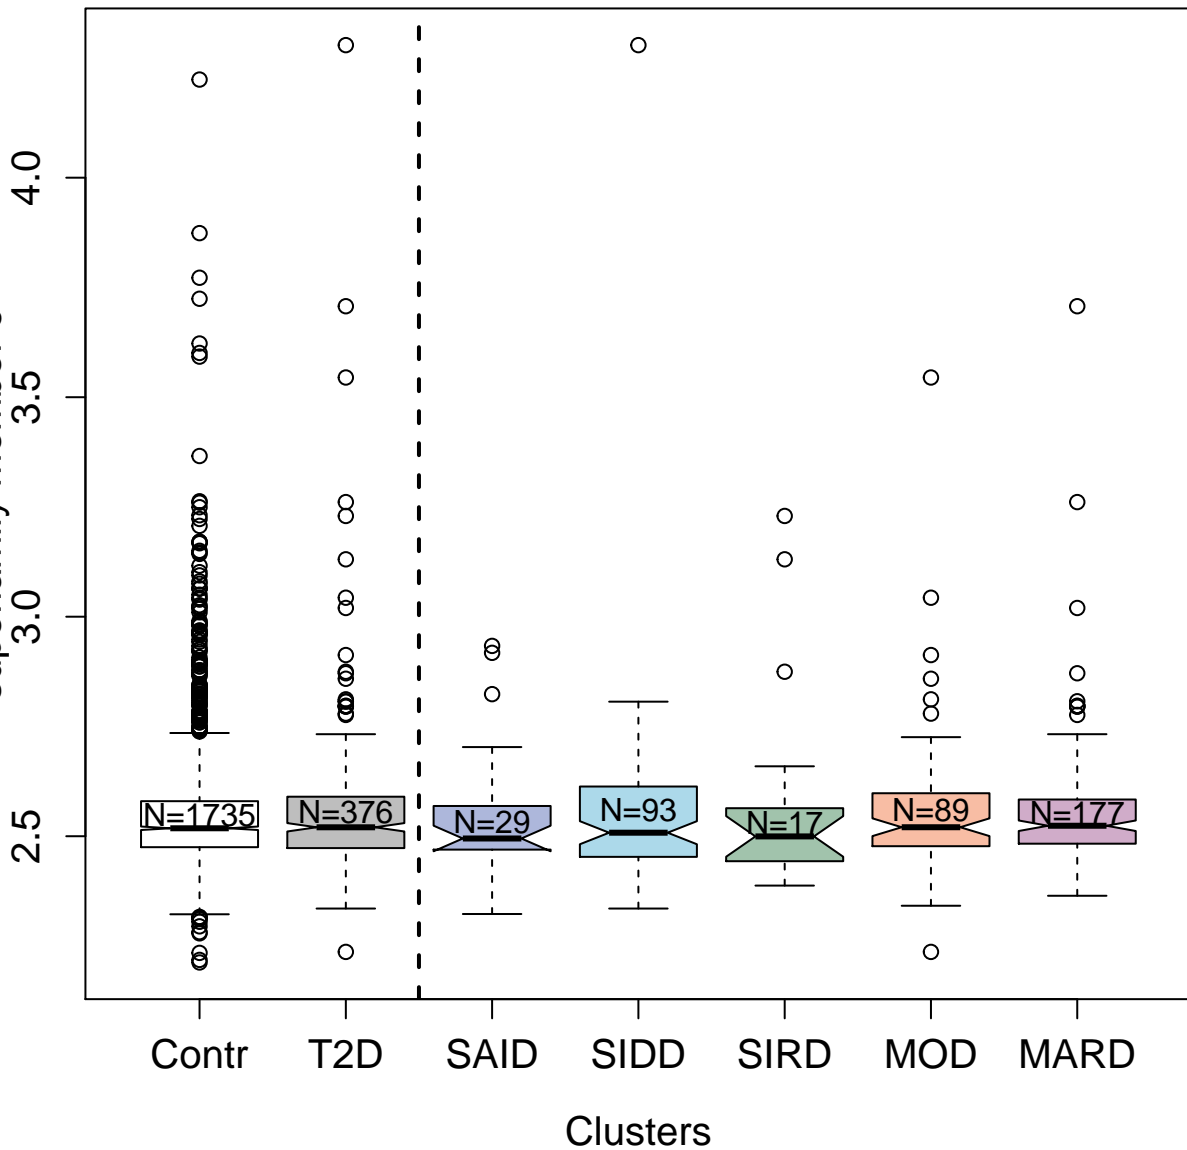



4891-50\_1 : Glucagon

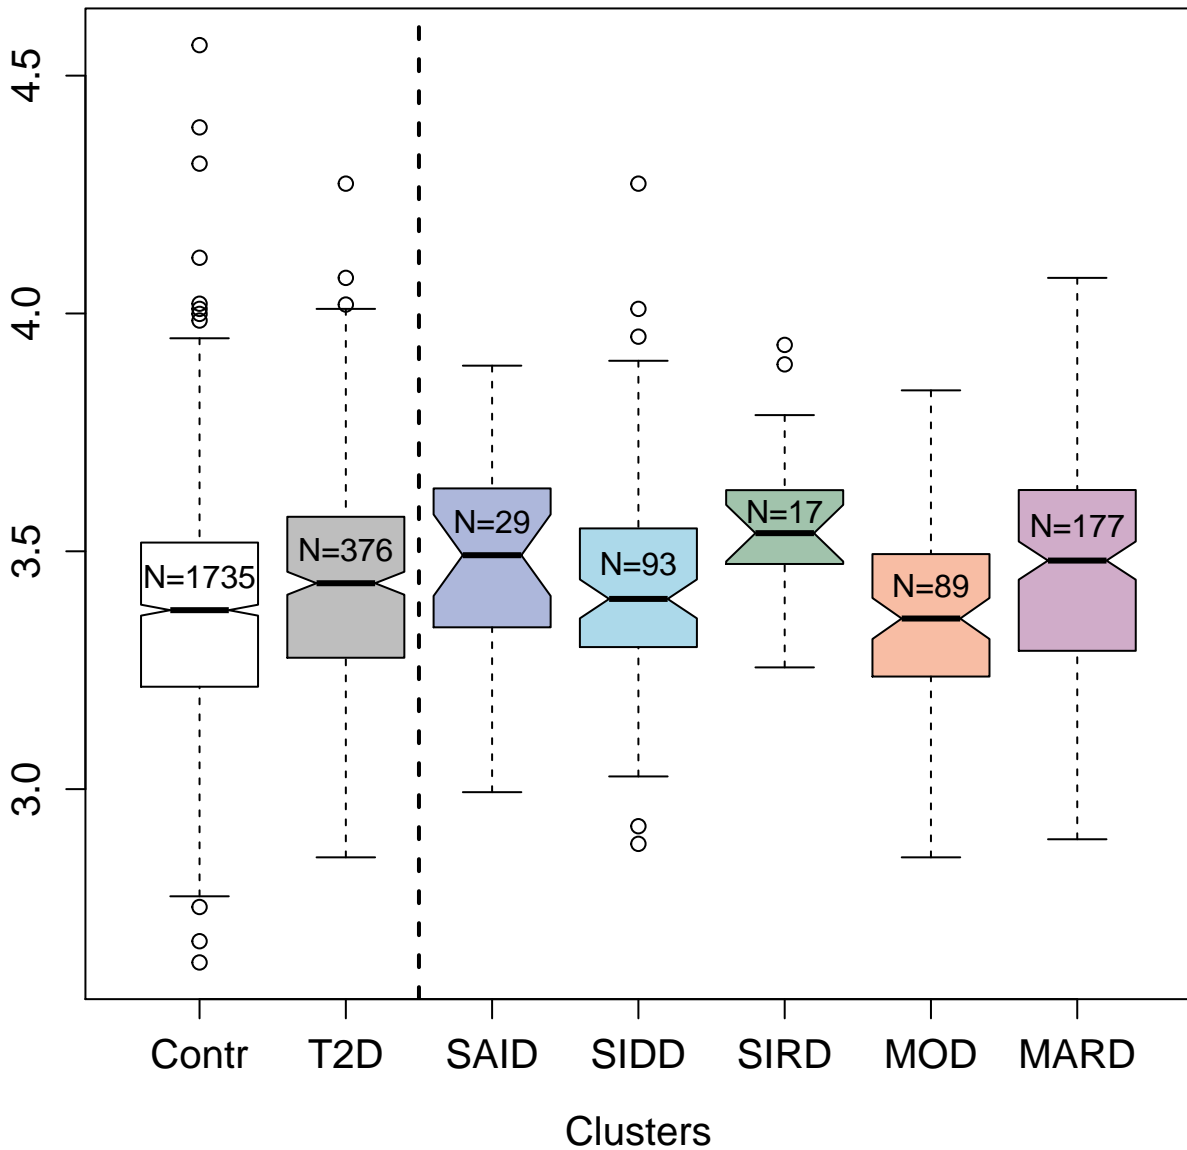

2681-23\_2 : Hepatocyte growth factor

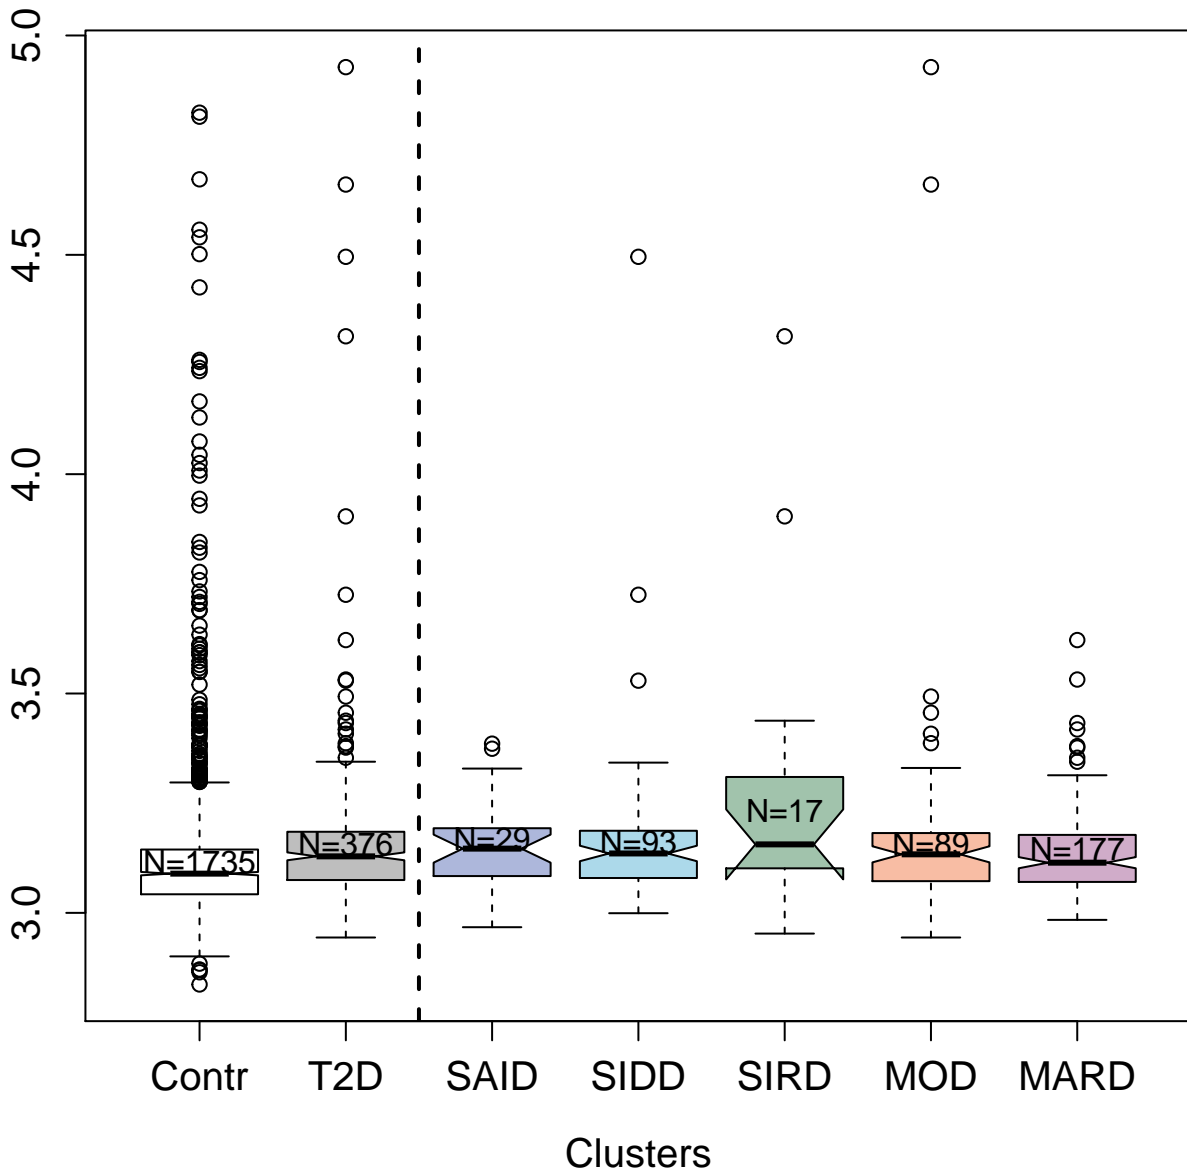

3322-52\_2 : Leucine-rich repeats and immunoglobulin-like domains protein 3

3.4 3.6 3.8 4.0 4.2 4.4

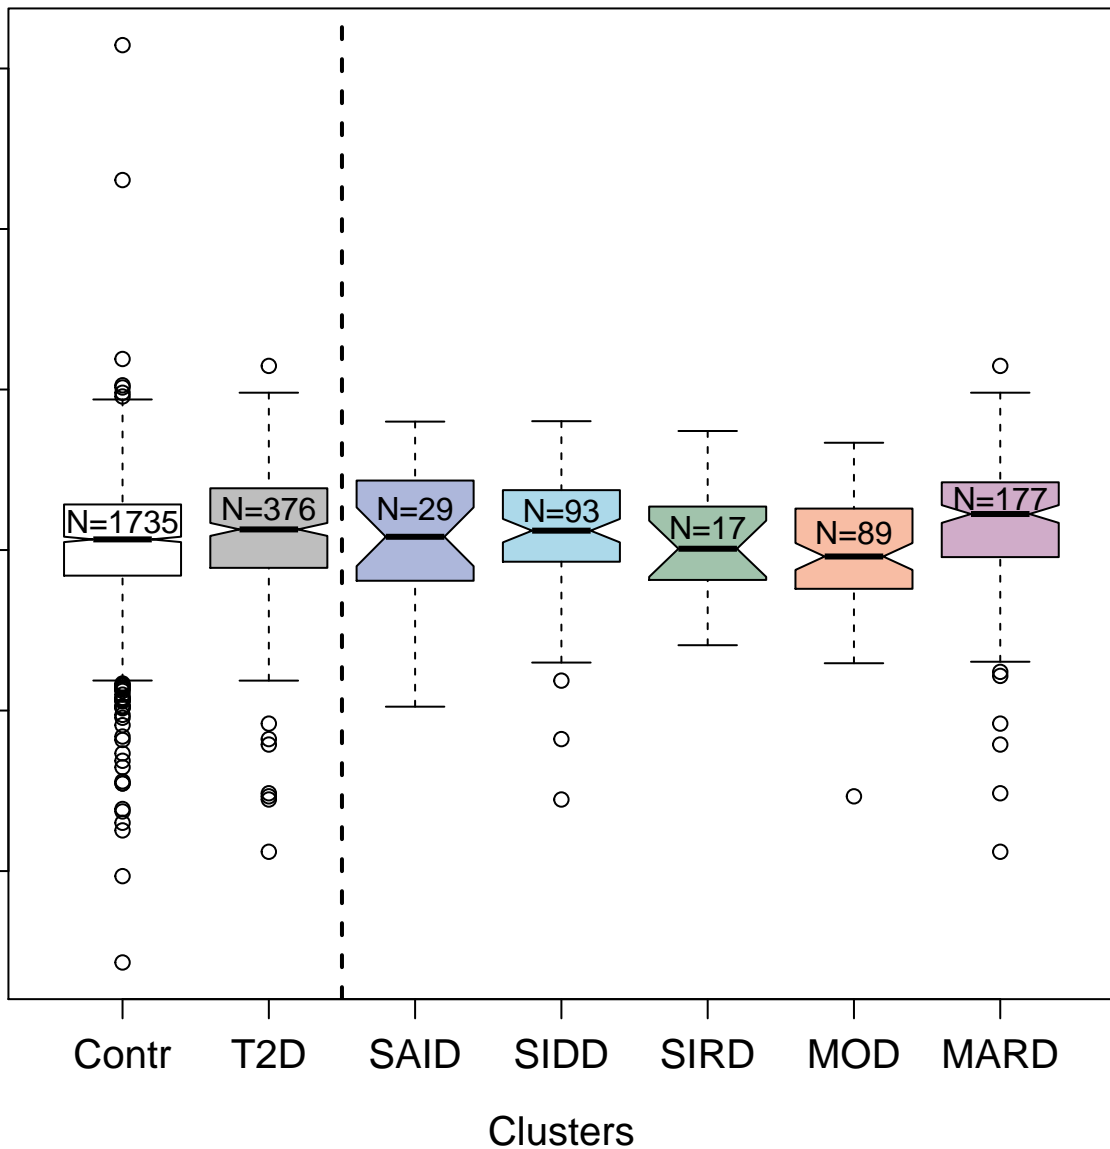

3054-3\_2 : Haptoglobin

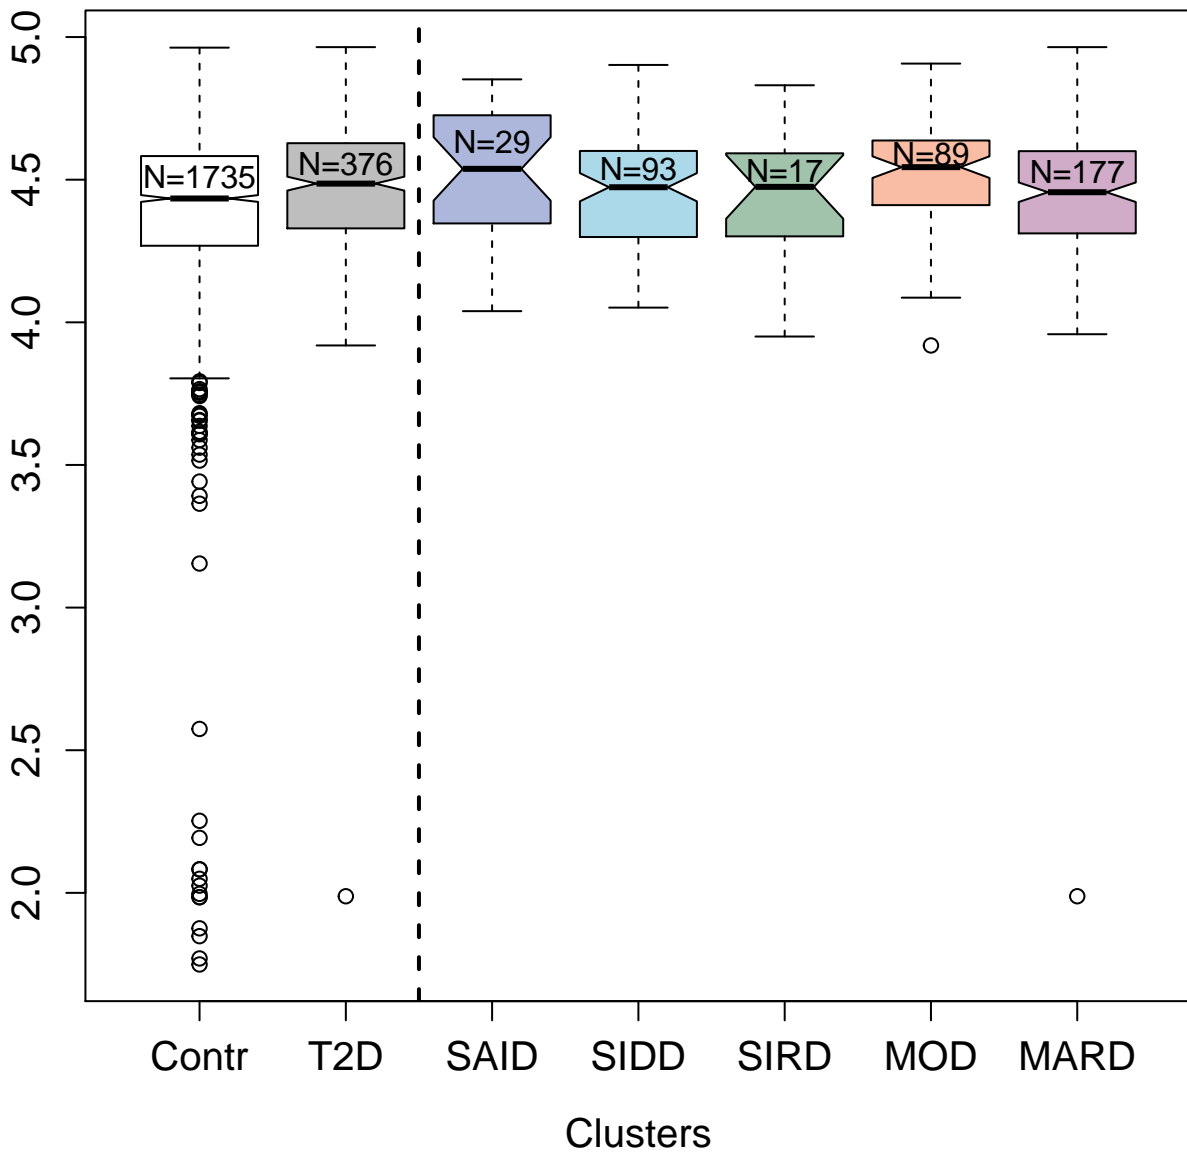

2579-17\_5 : Matrix metalloproteinase-9

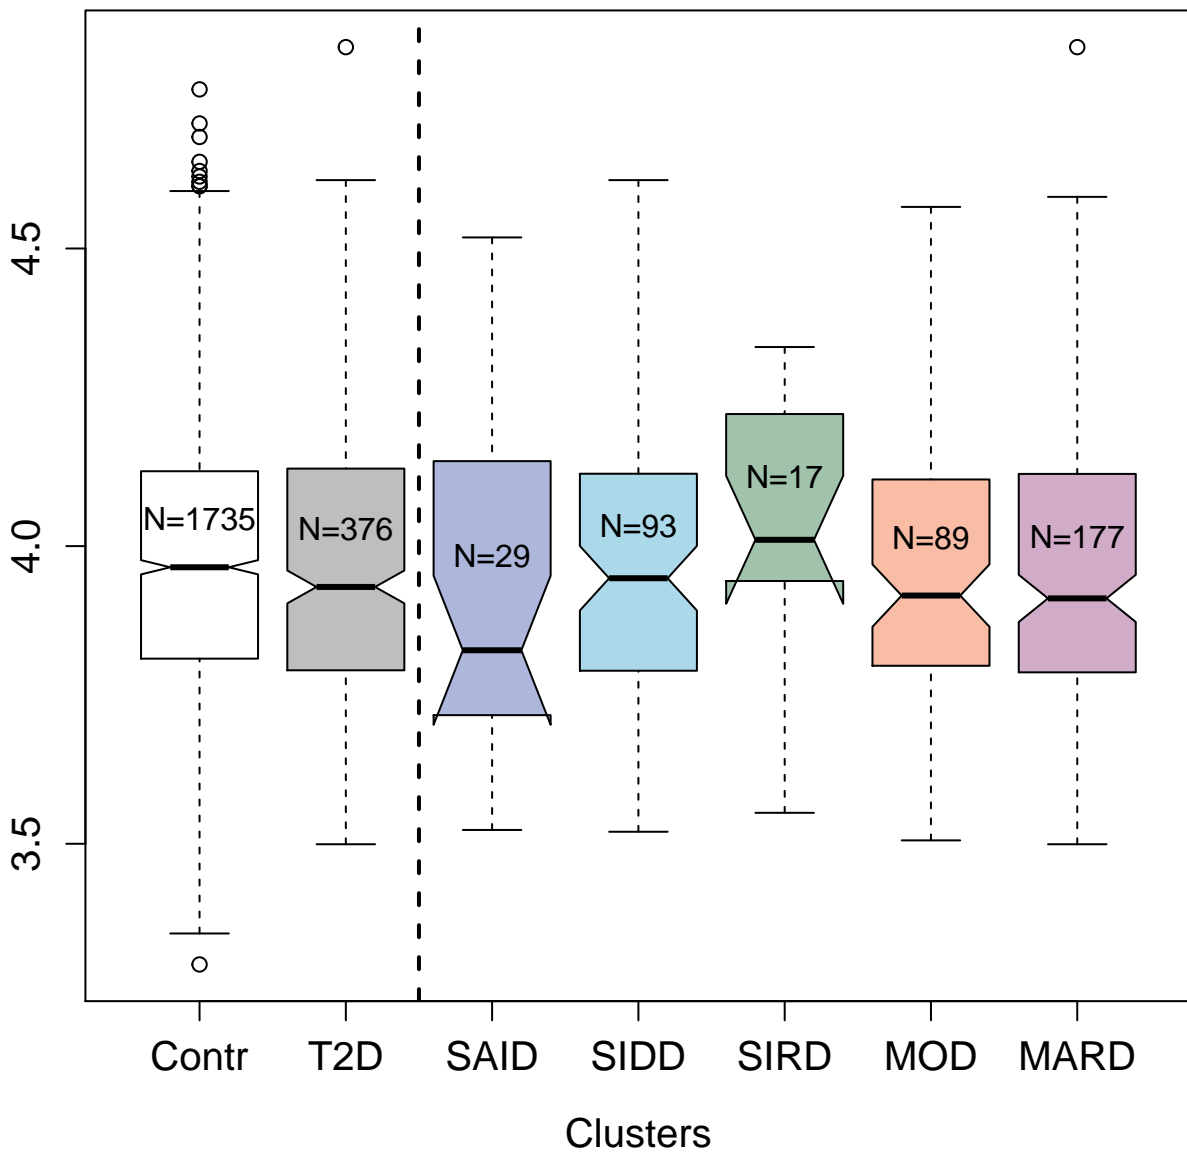

6653-58\_3 : Leukocyte surface antigen CD47

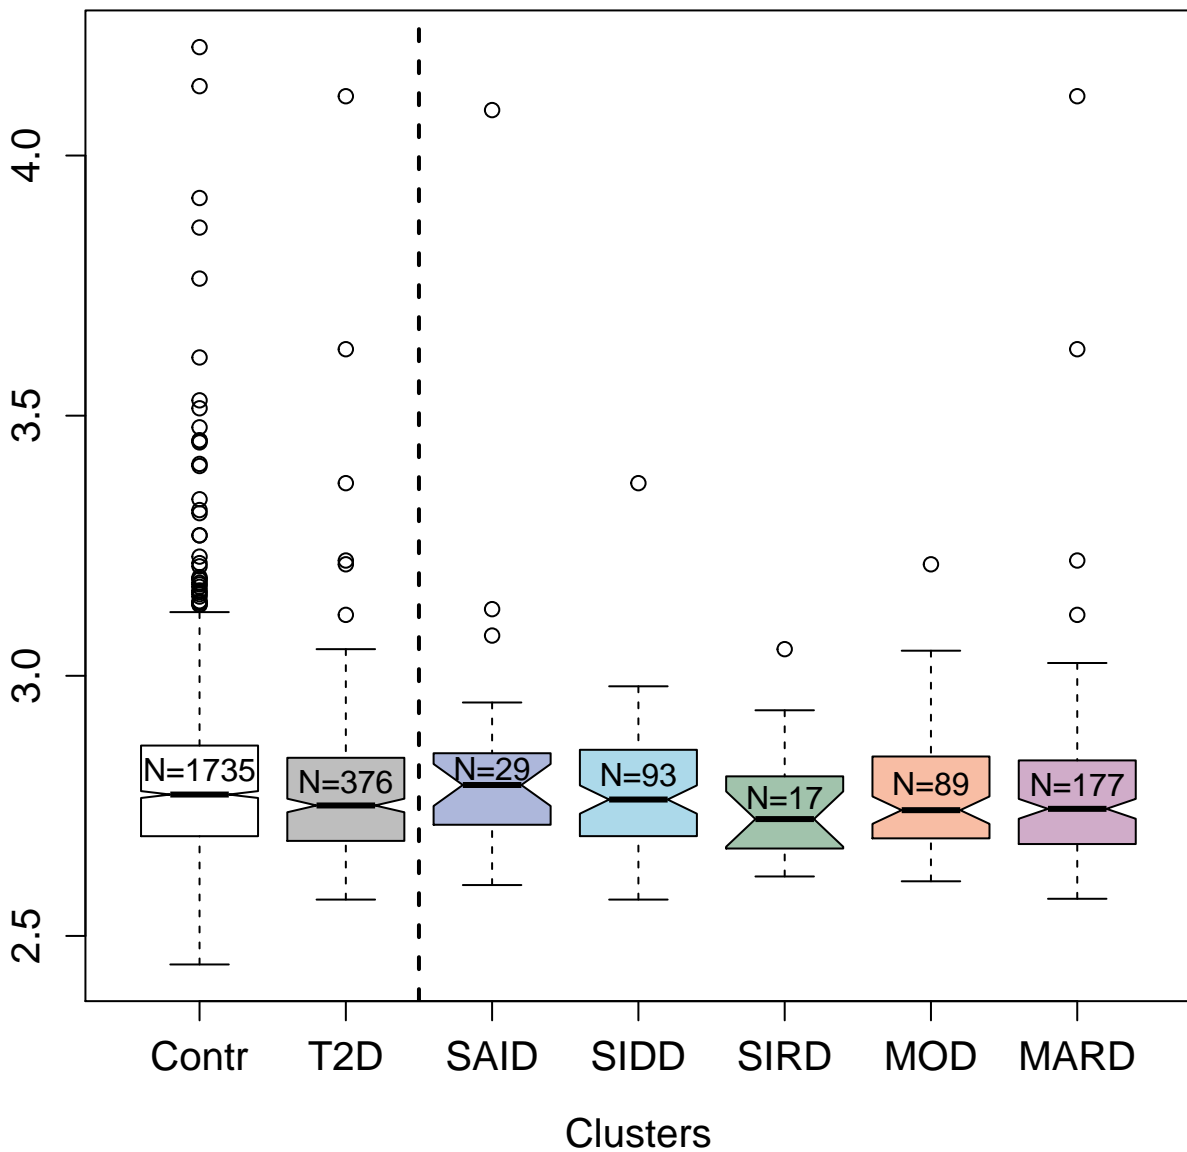

3797-1\_1 : Cadherin-2

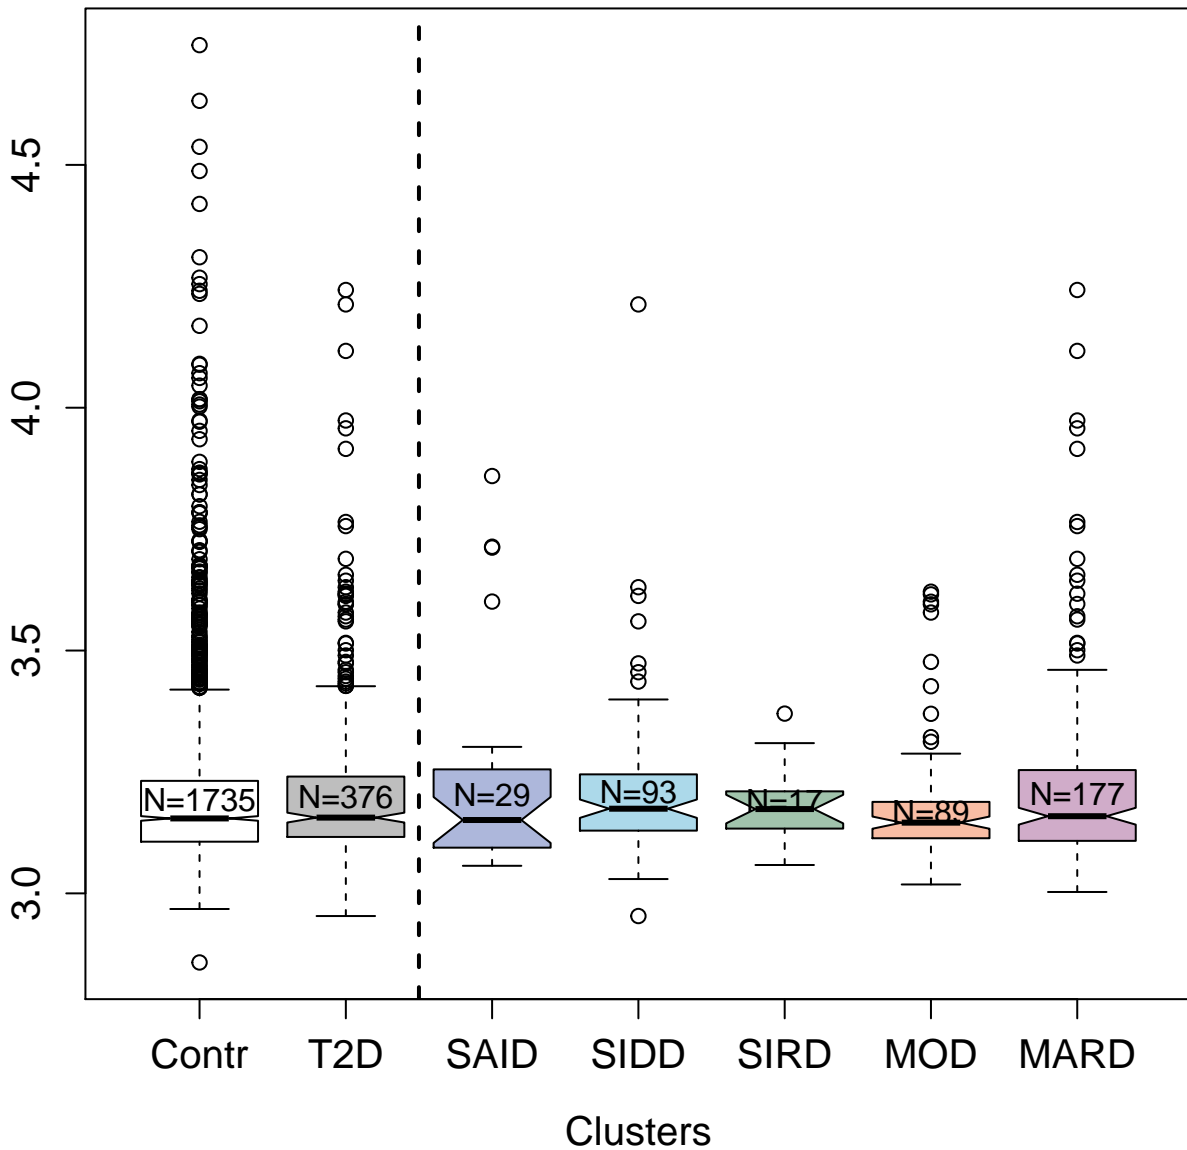

5014-49\_1 : Cytoplasmic protein NCK1

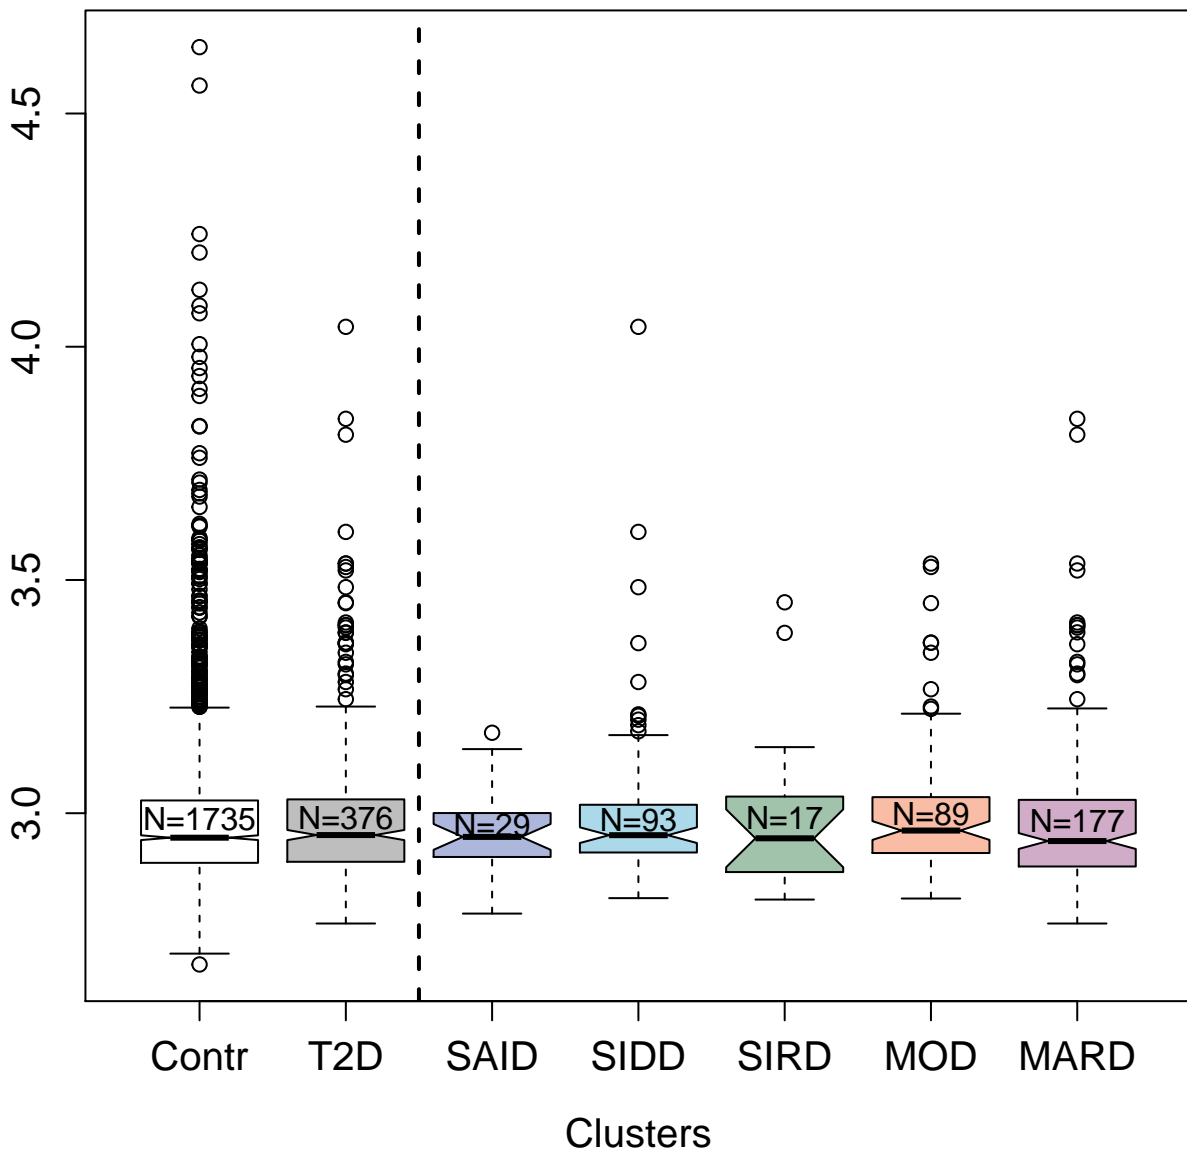



## 2764-20\_2 : Fibroblast growth factor 9

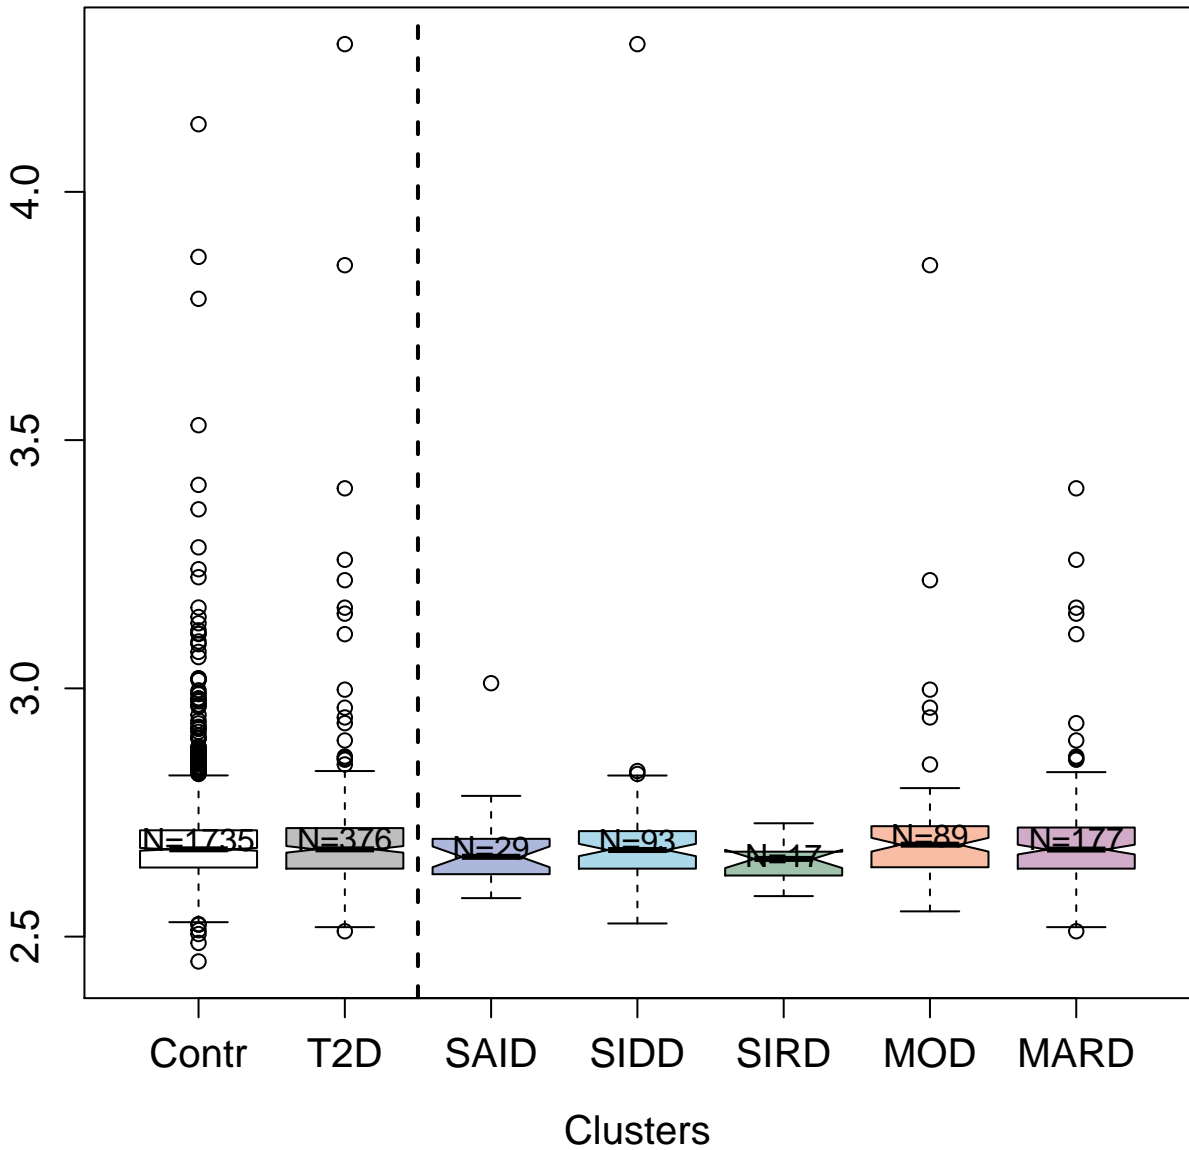

5947-90\_3 : Thrombopoietin

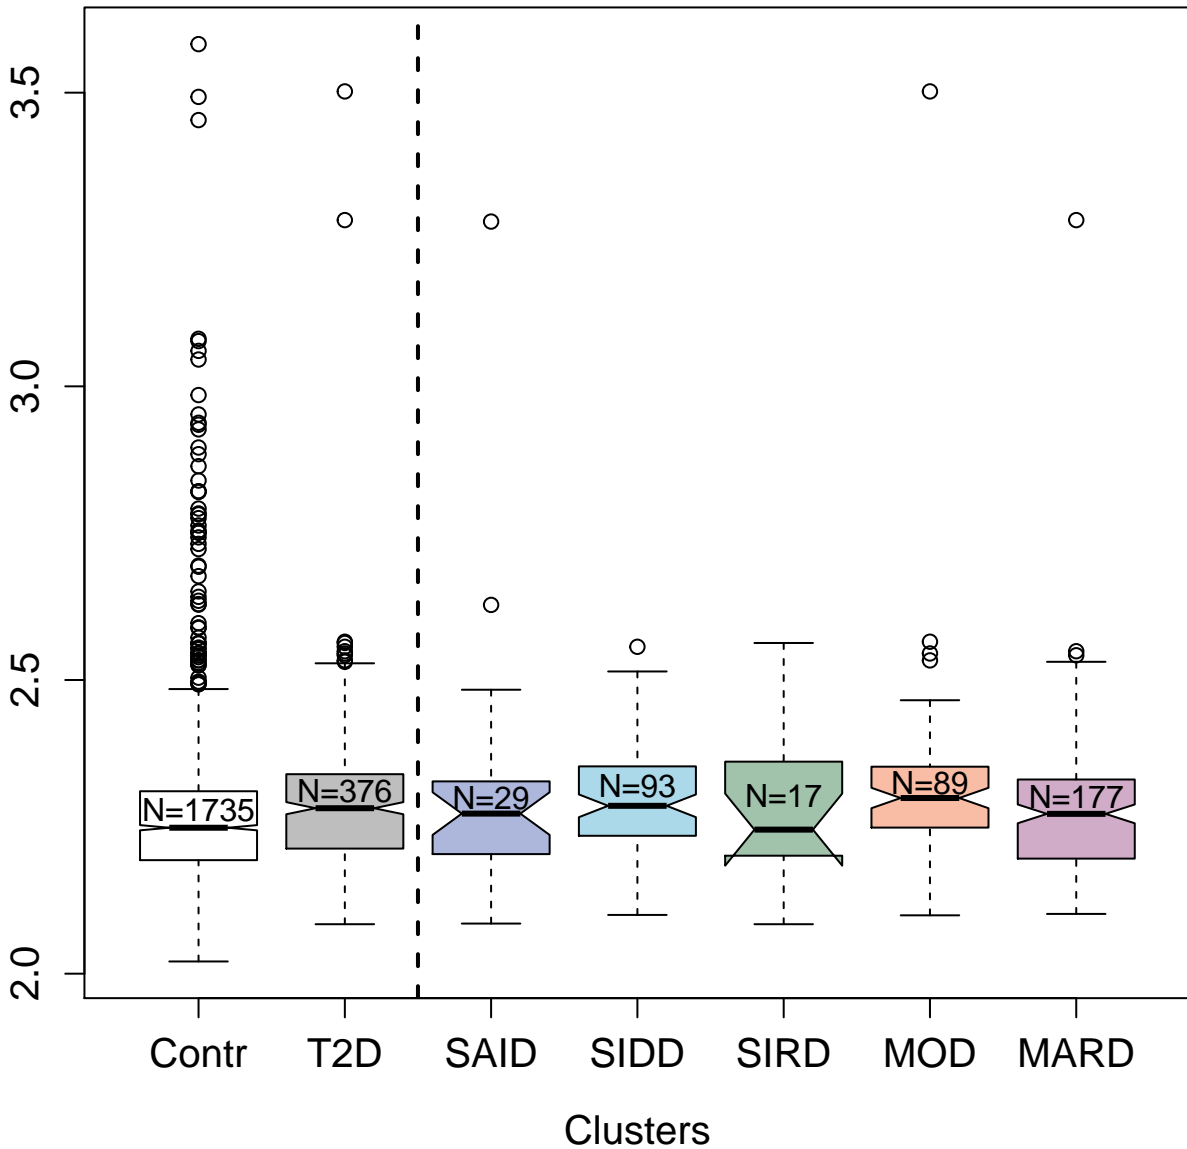

4851-25\_1 : Interleukin-1 alpha

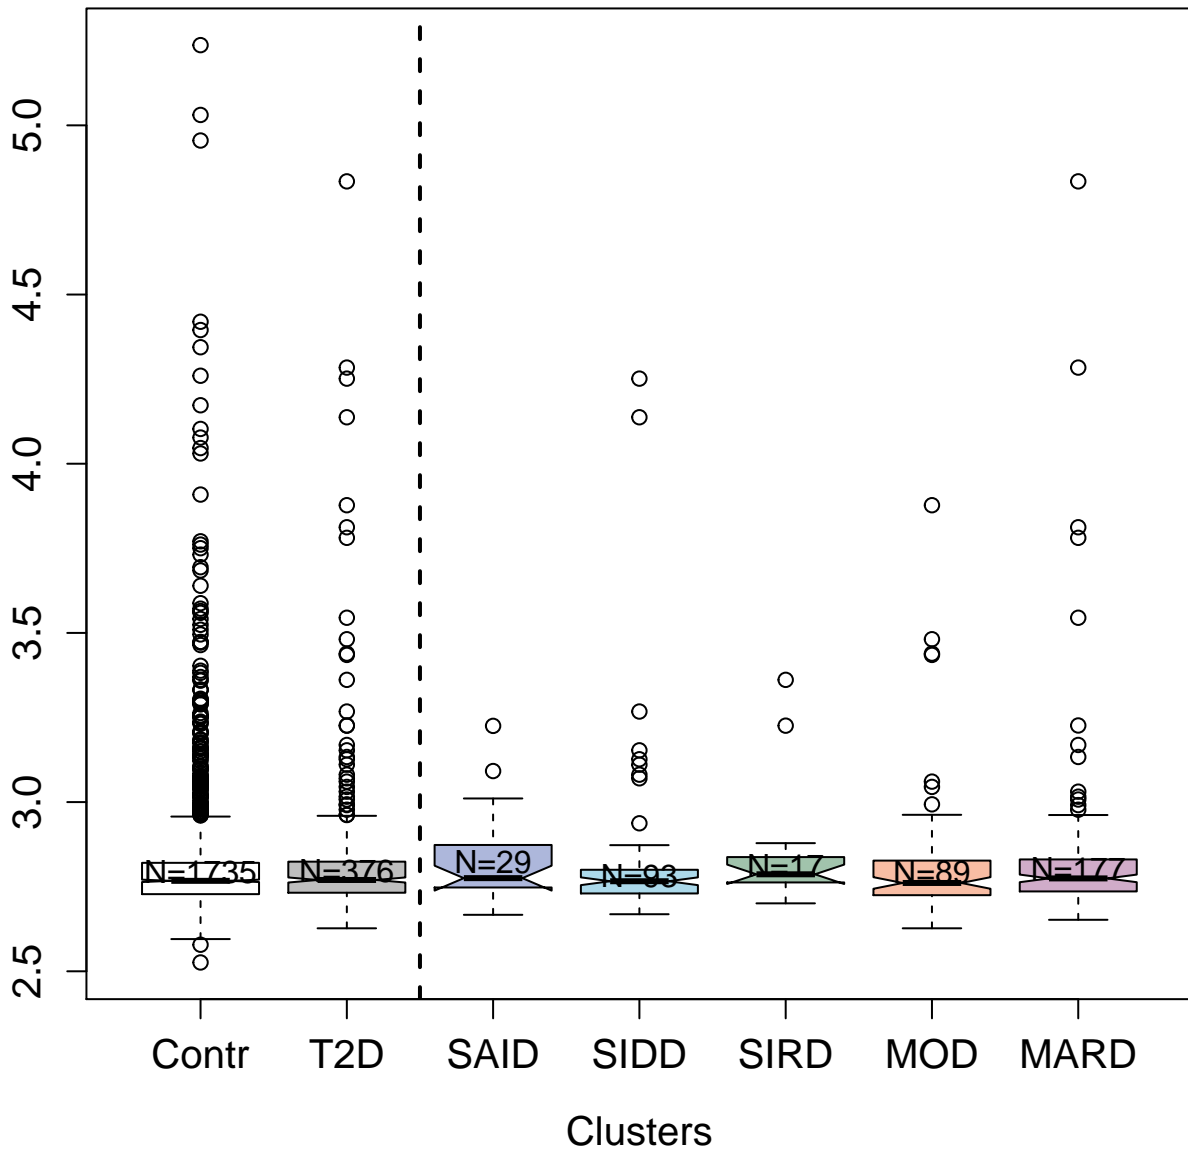

4495-33\_2 : Kininogen-1

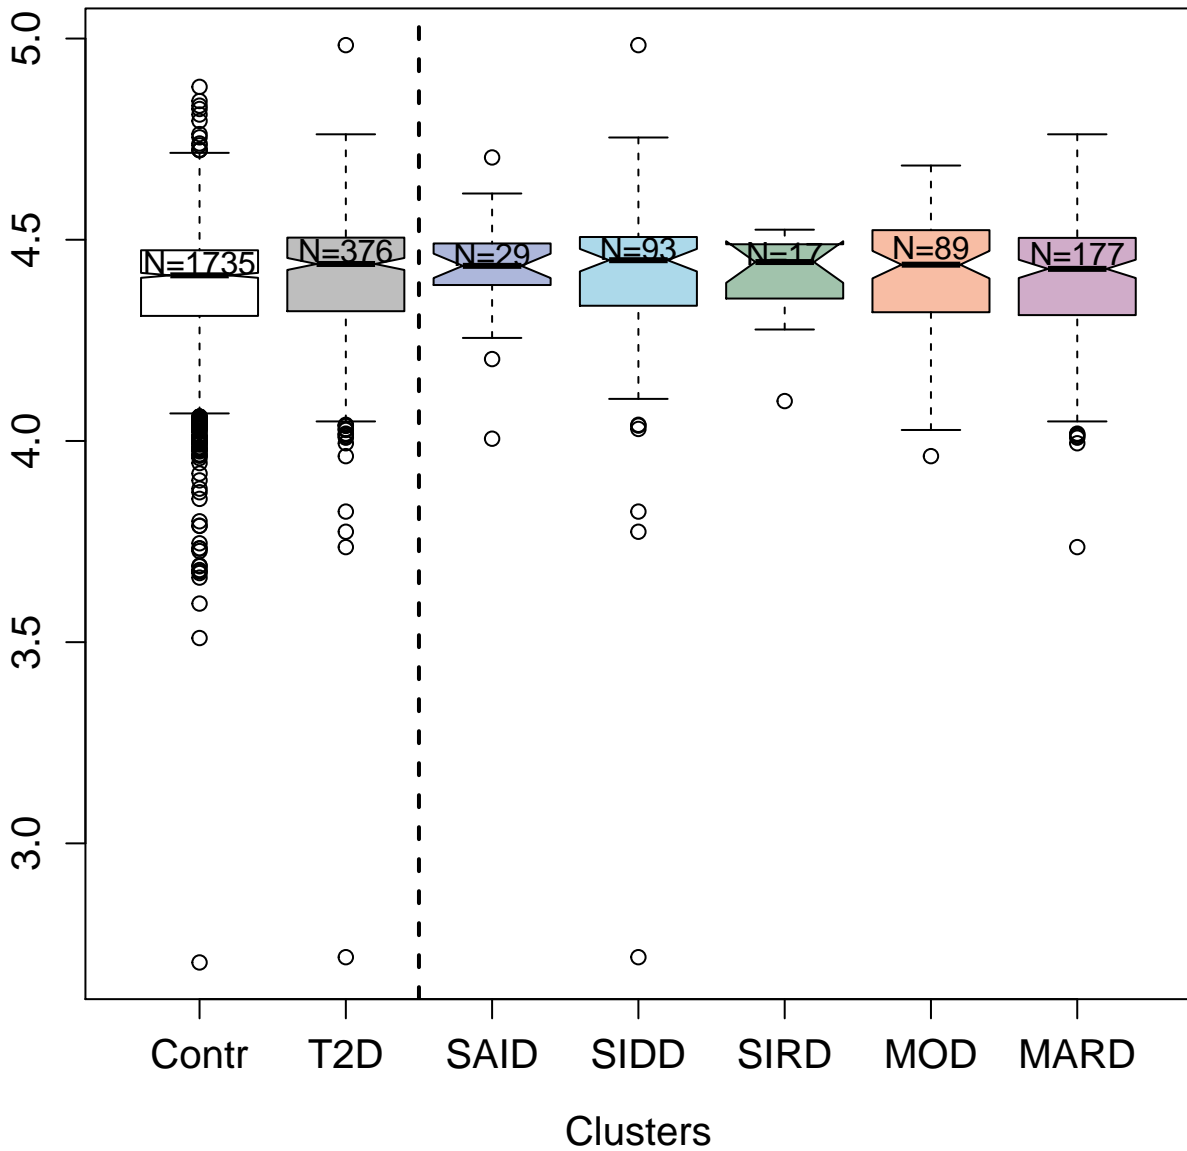

9173-21\_3 : Phosphoglucomutase-1

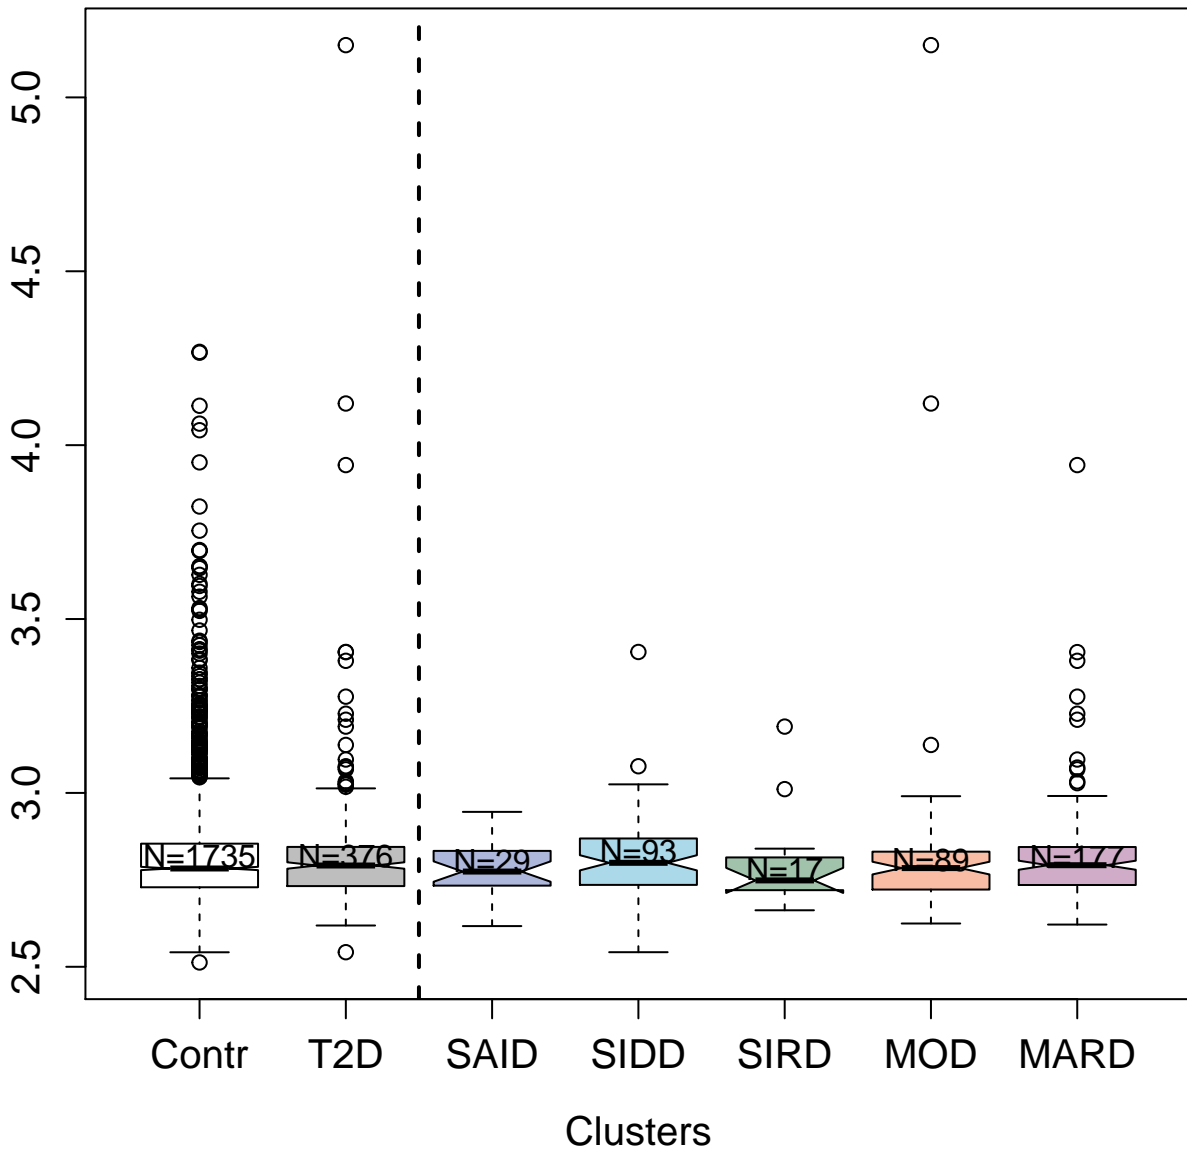

3847-56\_2 : Persulfide dioxygenase ETHE1;

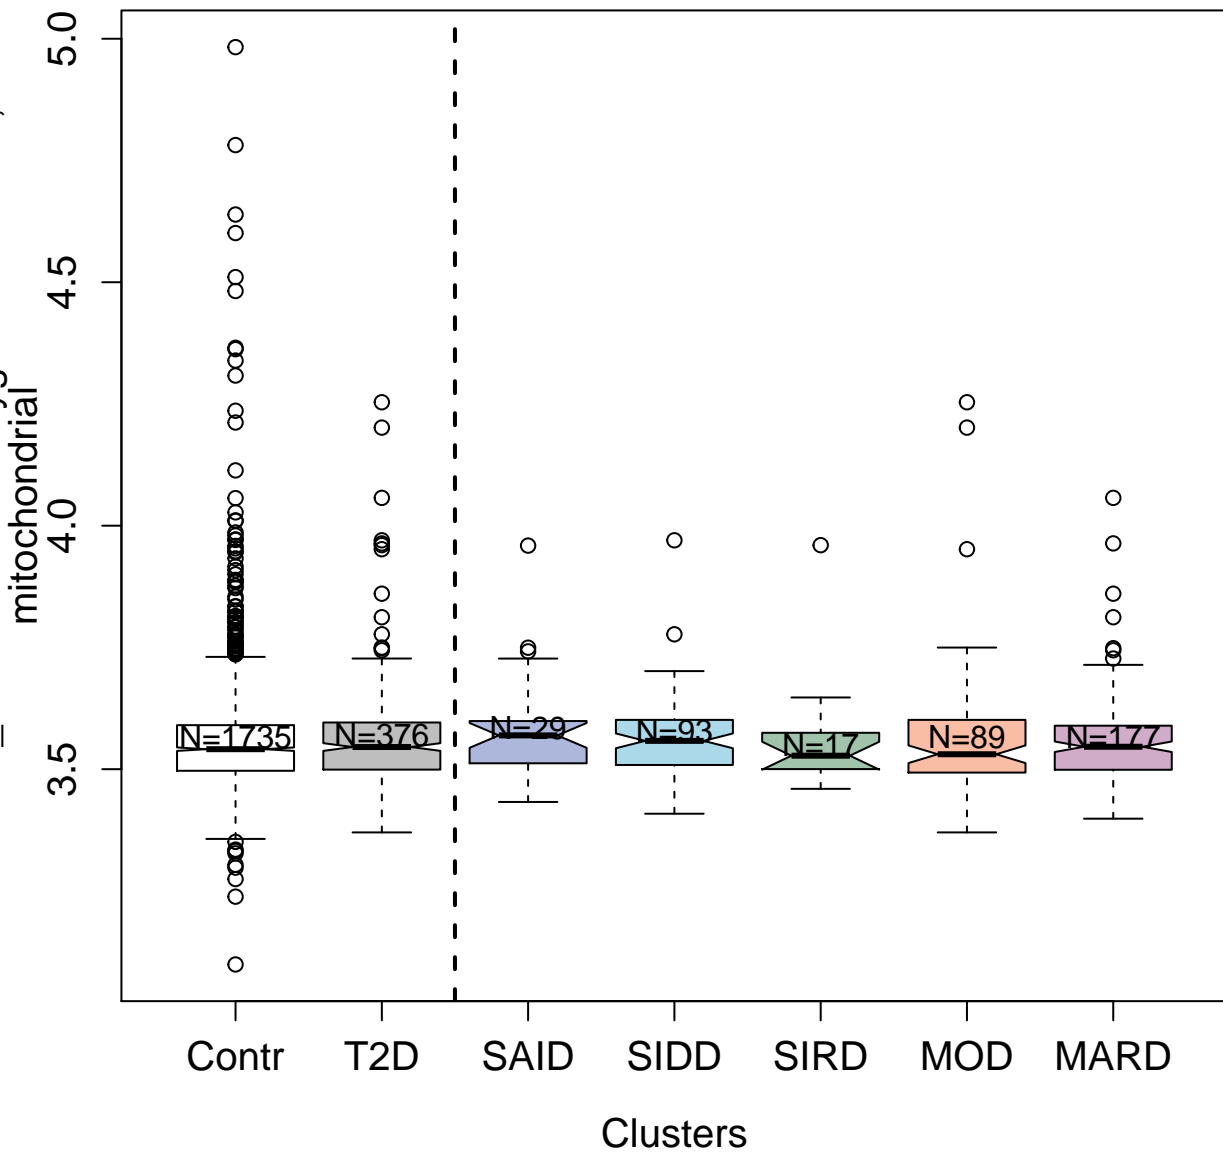

2979-8\_2 : C-X-C motif chemokine 5

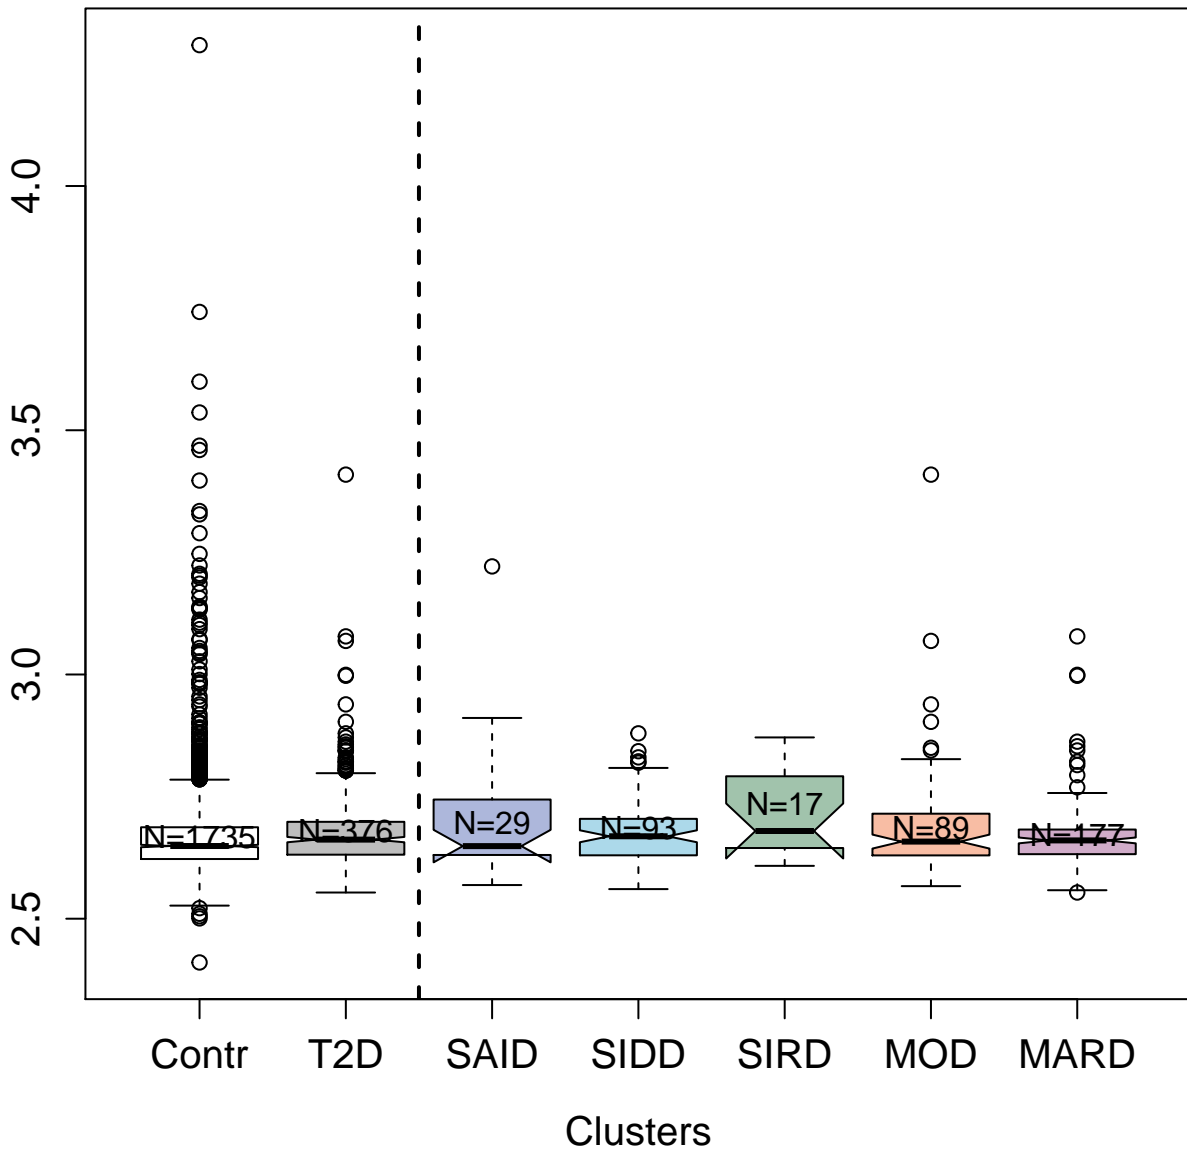

14151-4\_3 : Ubiquitin-like protein ISG15

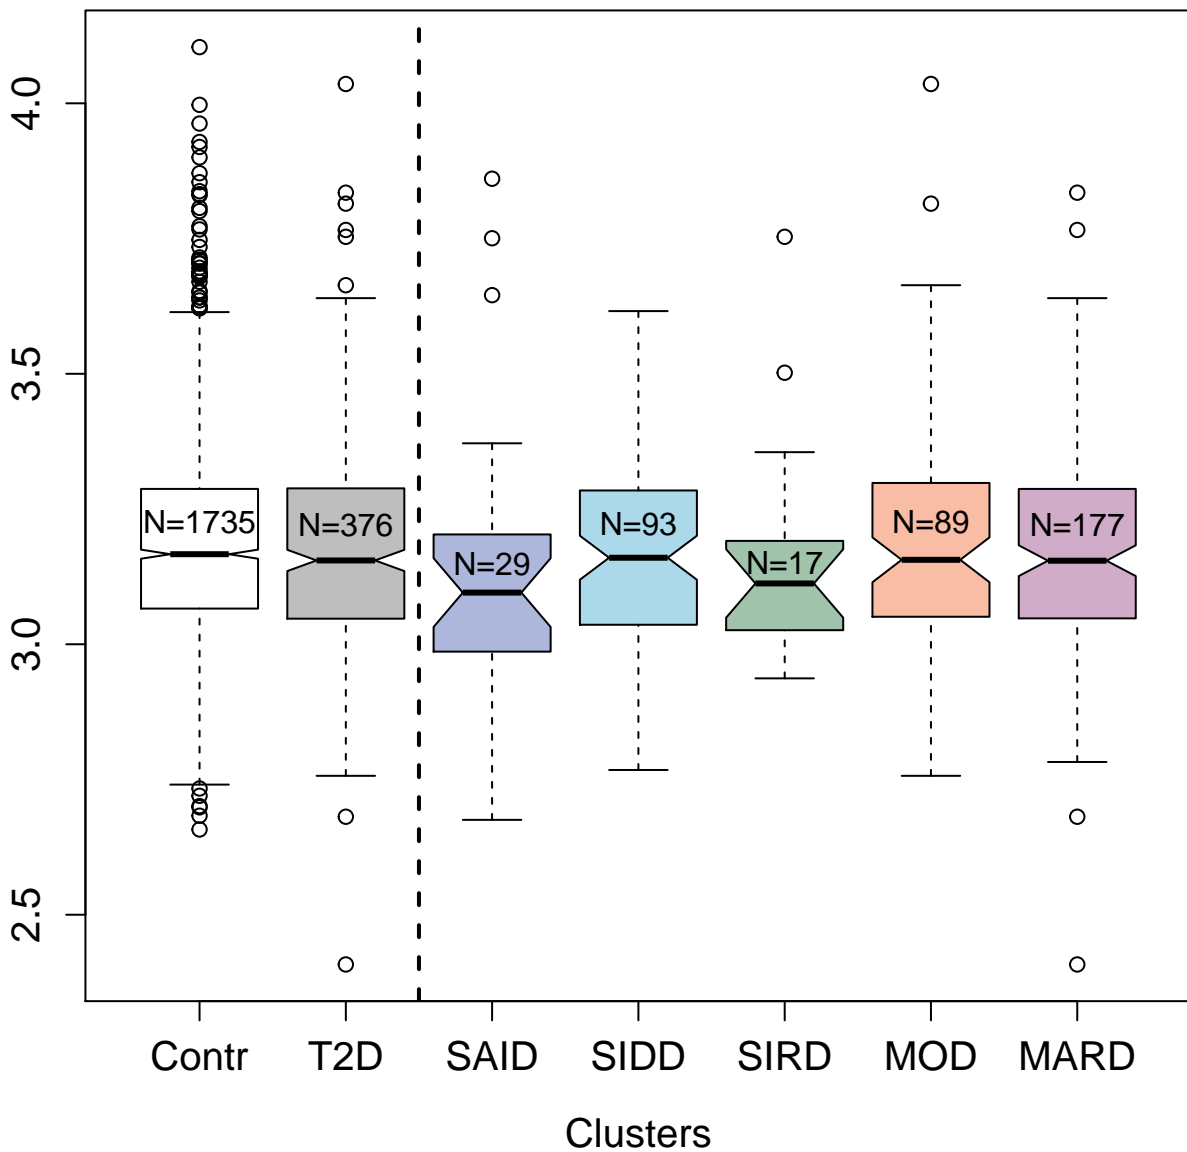



3443-61\_2 : Homeodomain-interacting protein kinase 3

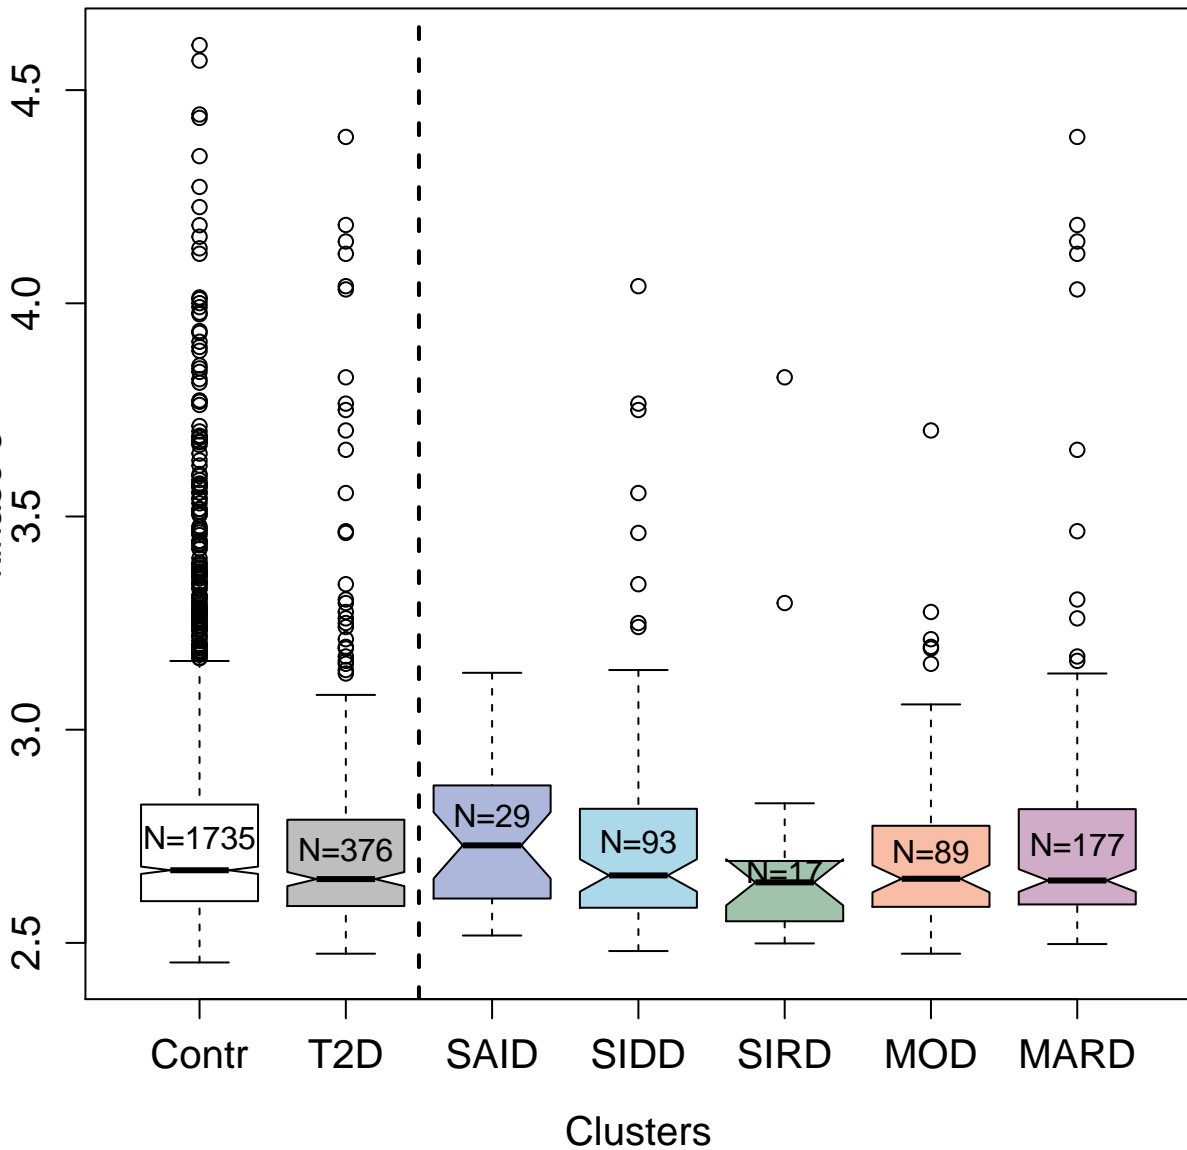

9176-3\_3 : Mucin-1

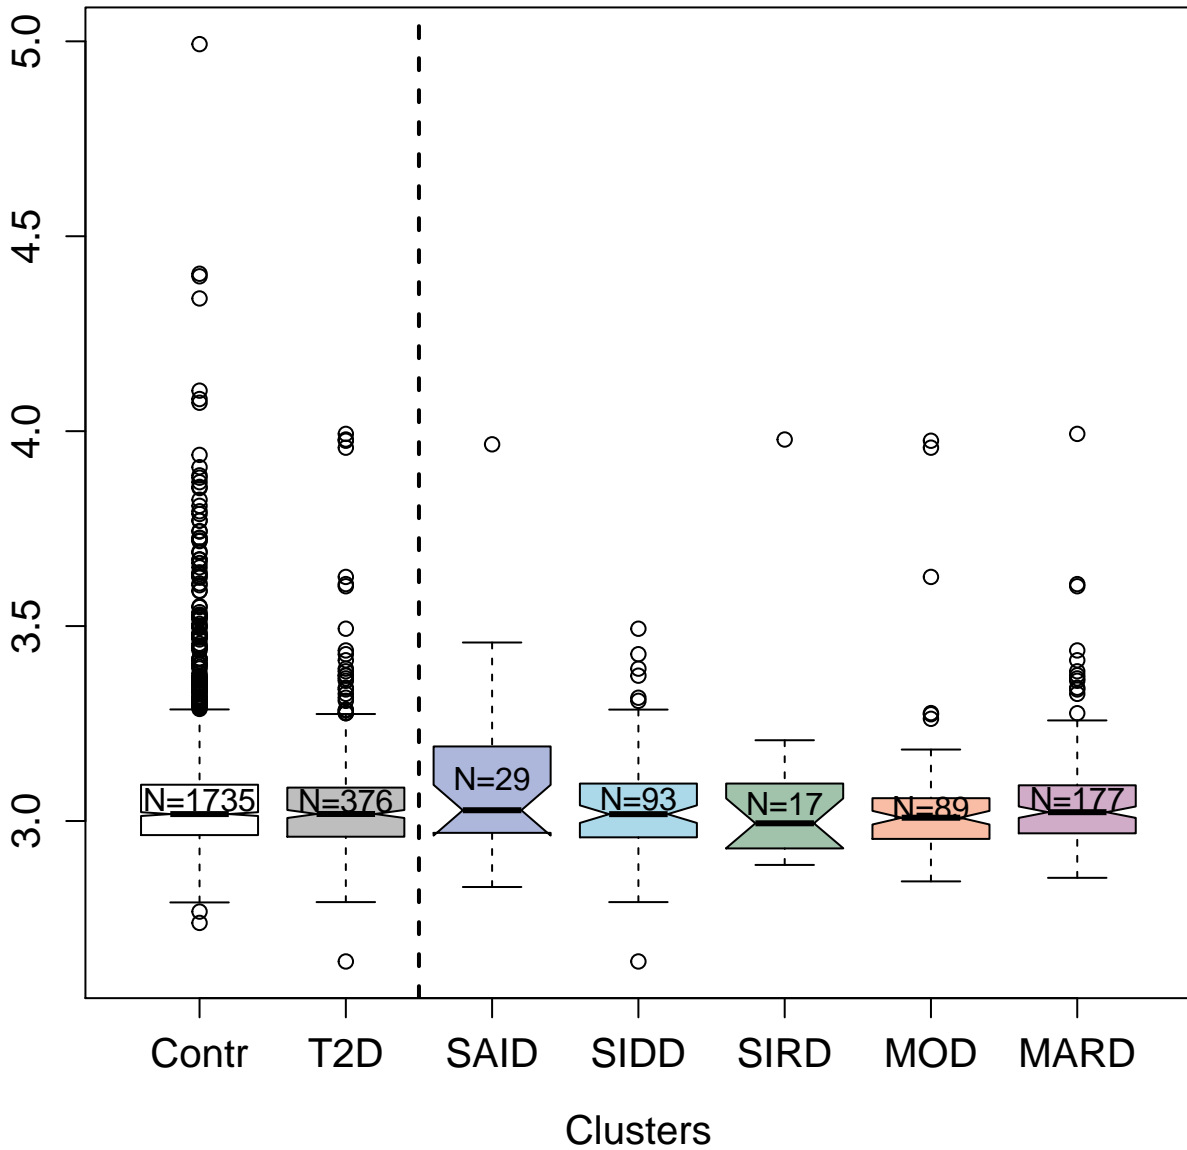



5440-26\_3 : Troponin I; fast skeletal muscle

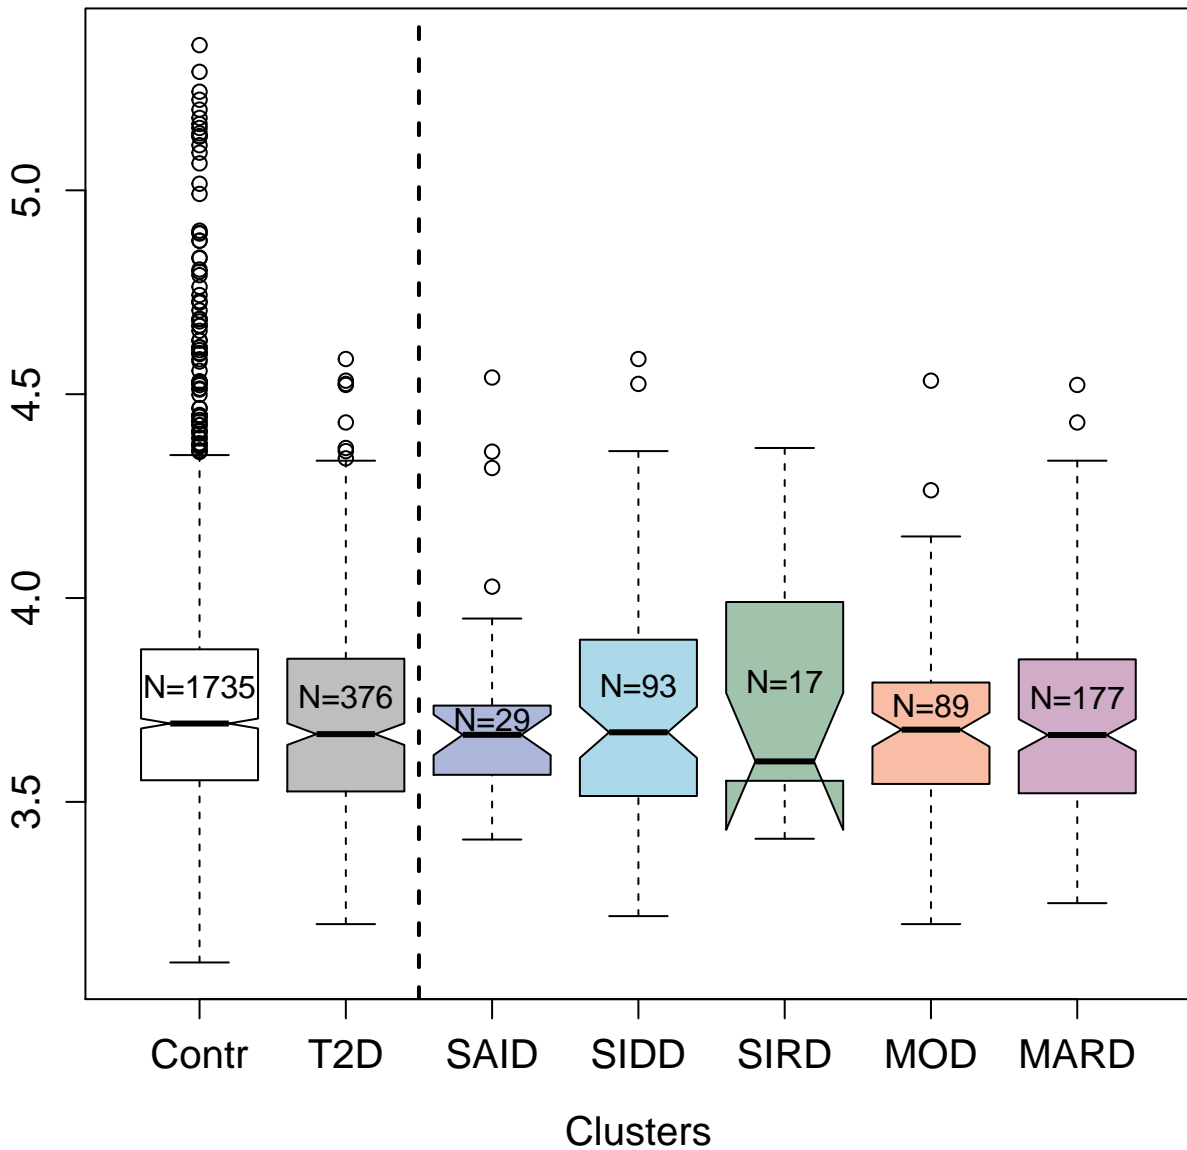

2994-71\_2 : Interleukin-1 receptor-like 2

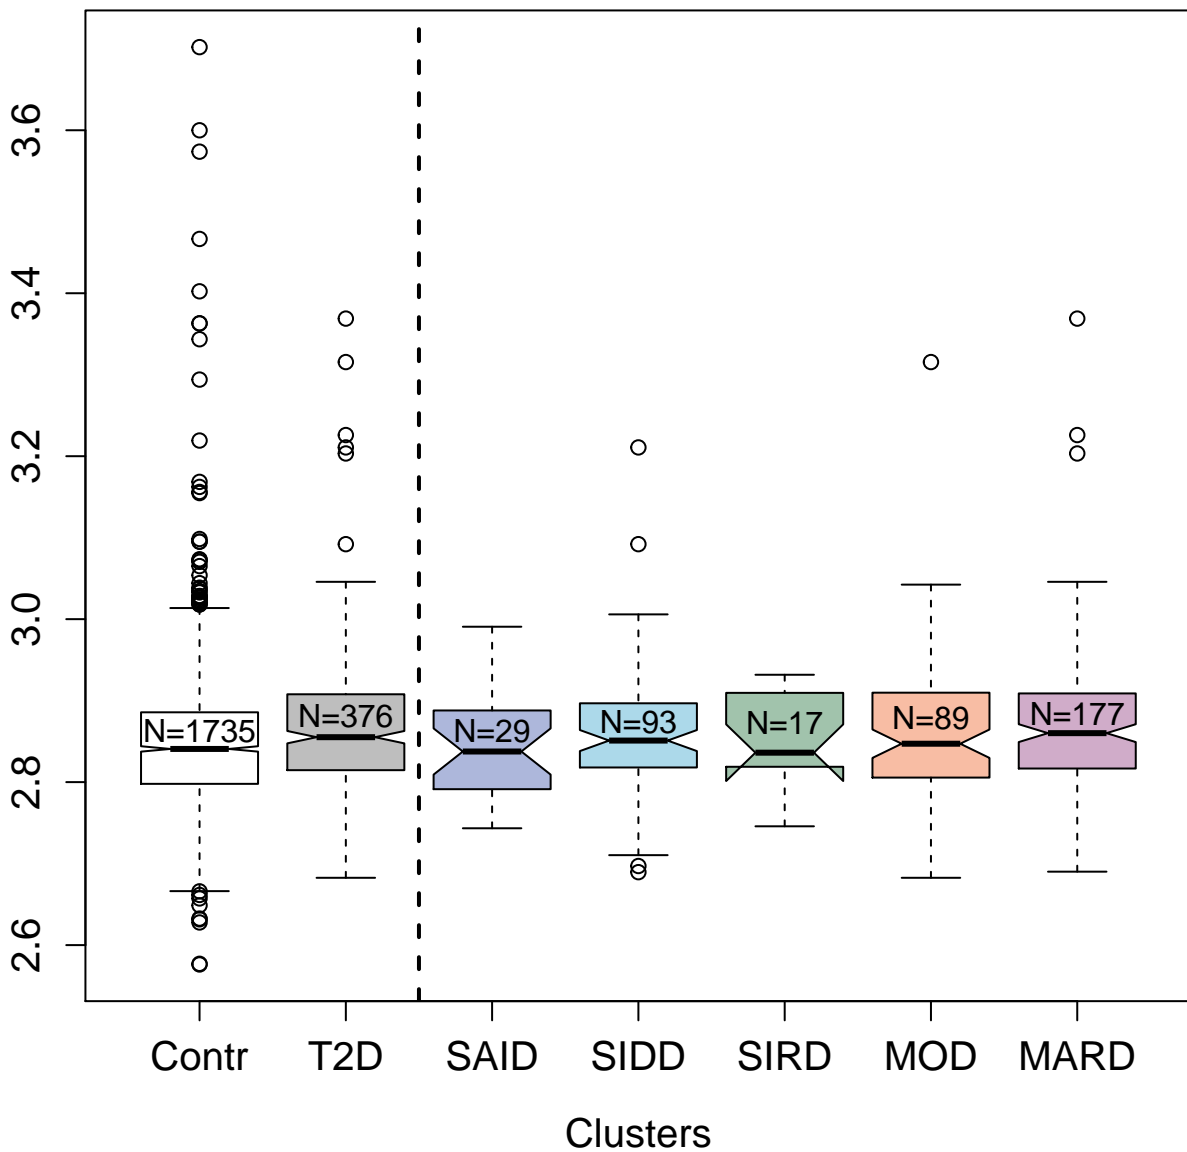

5355-69\_3: Tumor necrosis factor ligand  
superfamily member 14

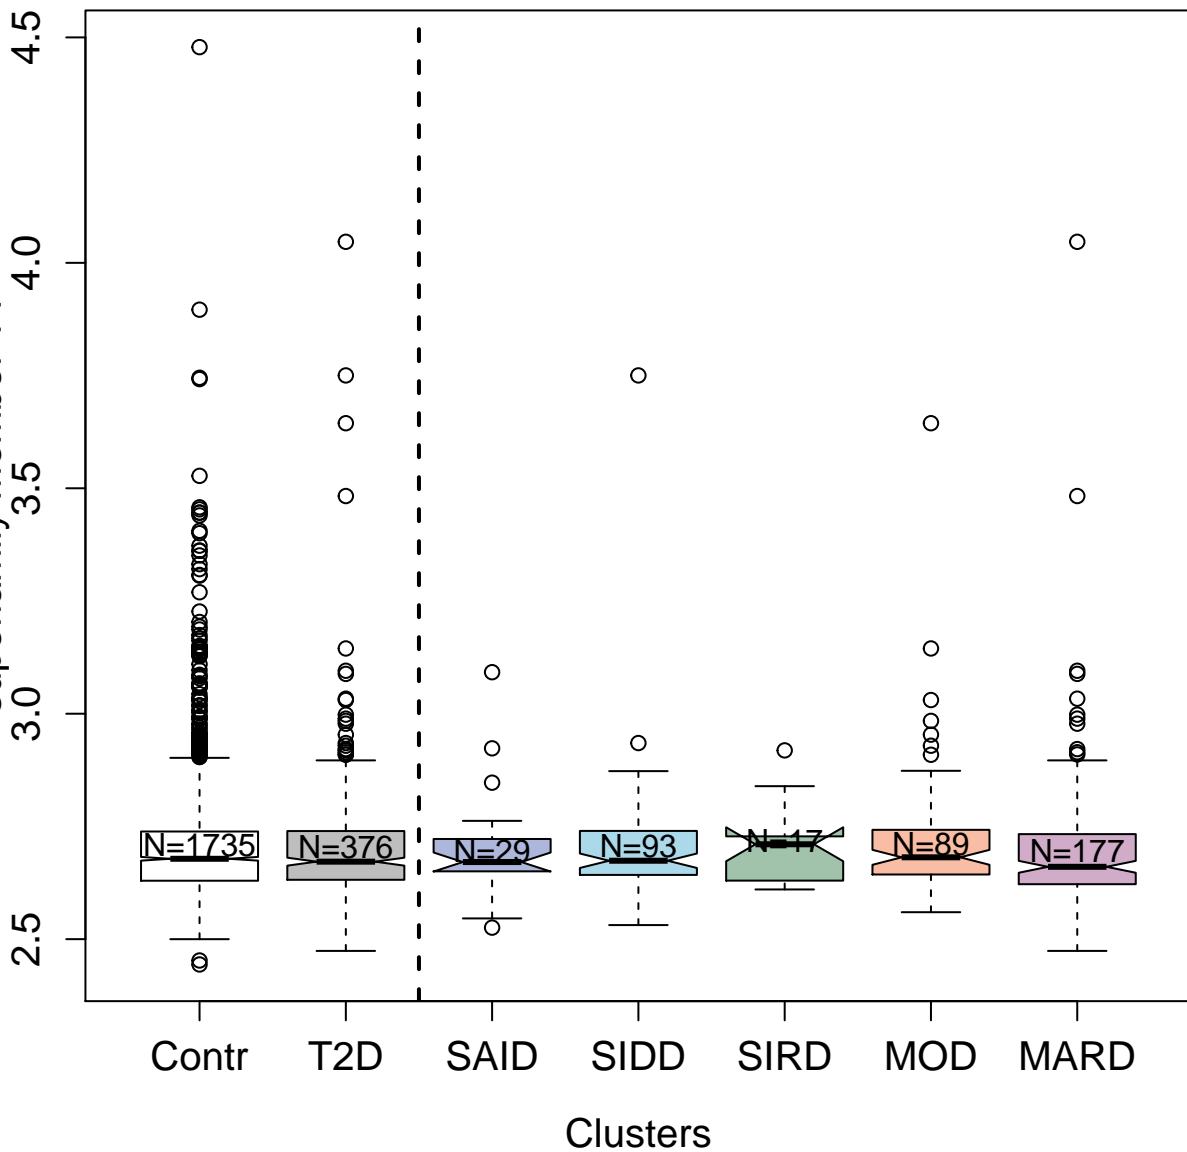

3891-56\_1 : Methyl-CpG-binding domain protein 4

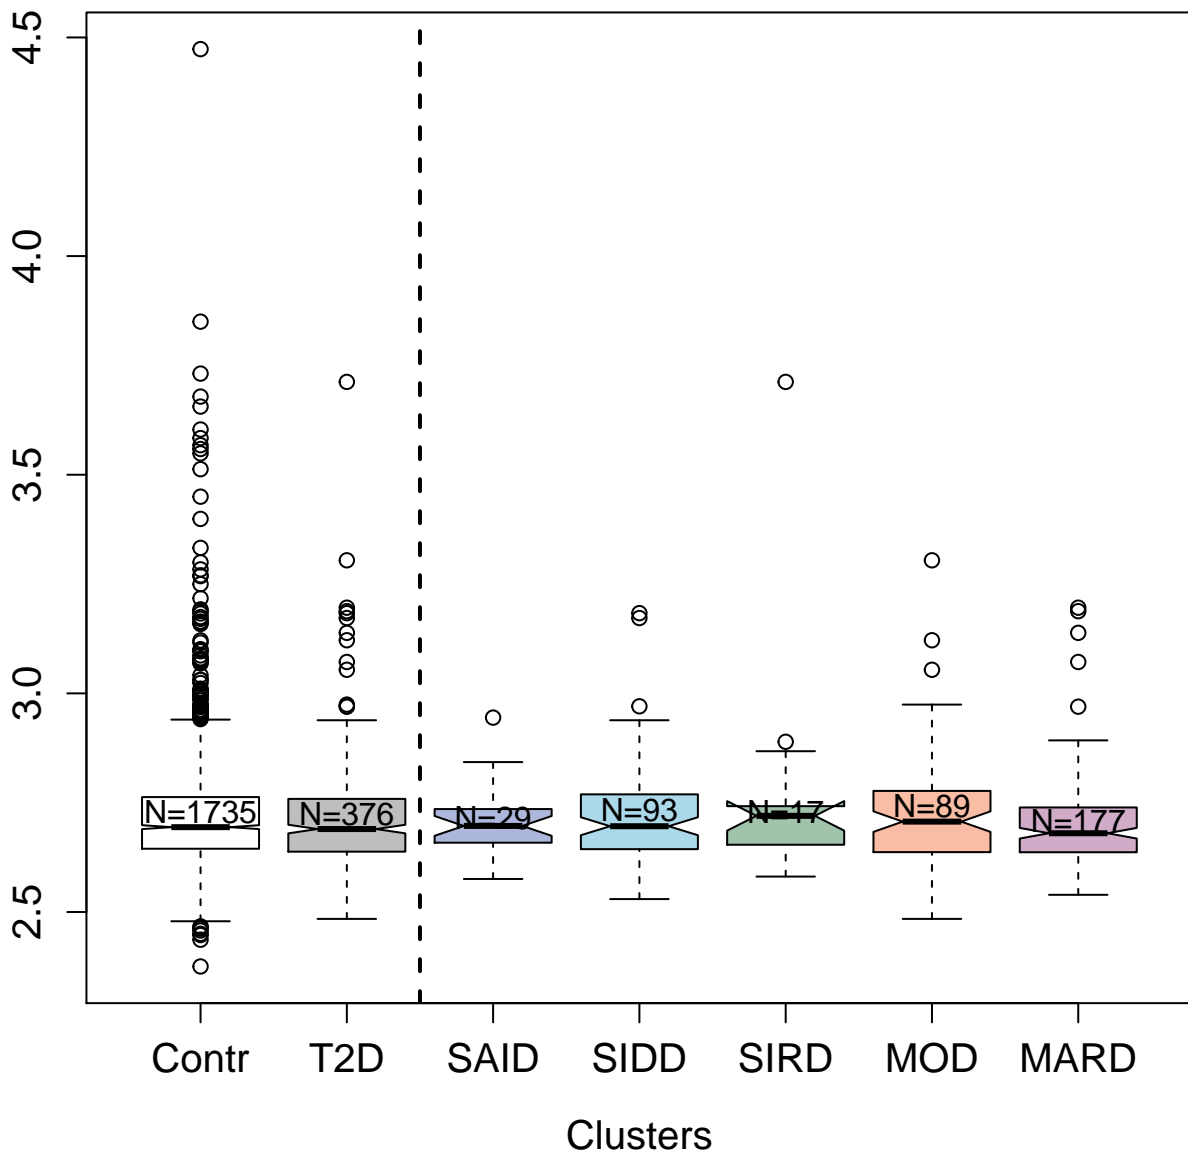

3823-9\_1 : Megakaryocyte-associated tyrosine-protein kinase

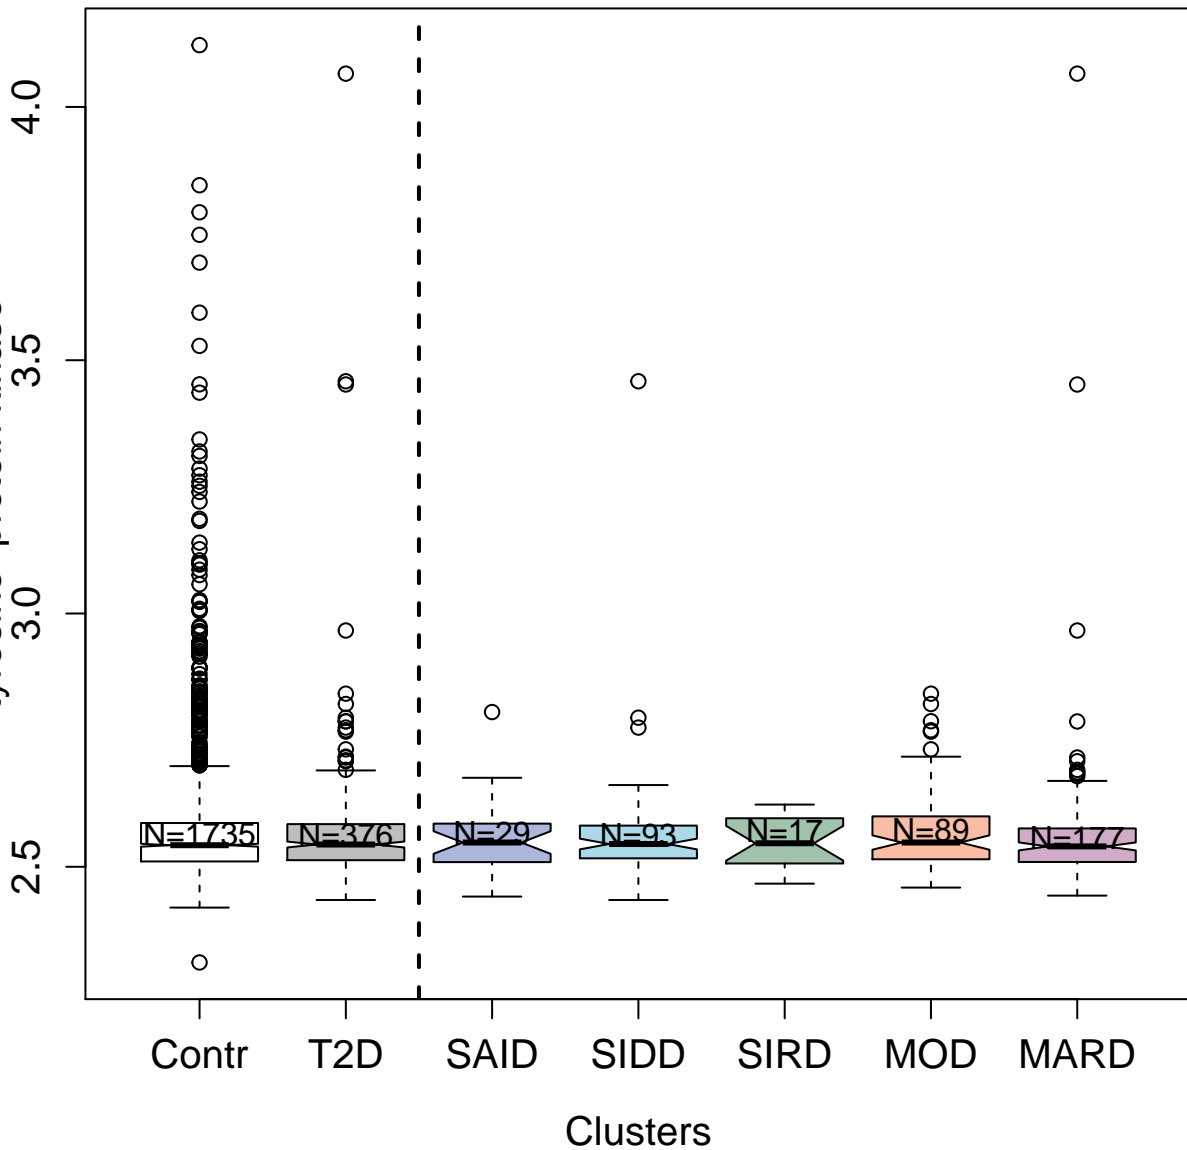



4904-7\_1 : Caspase-2

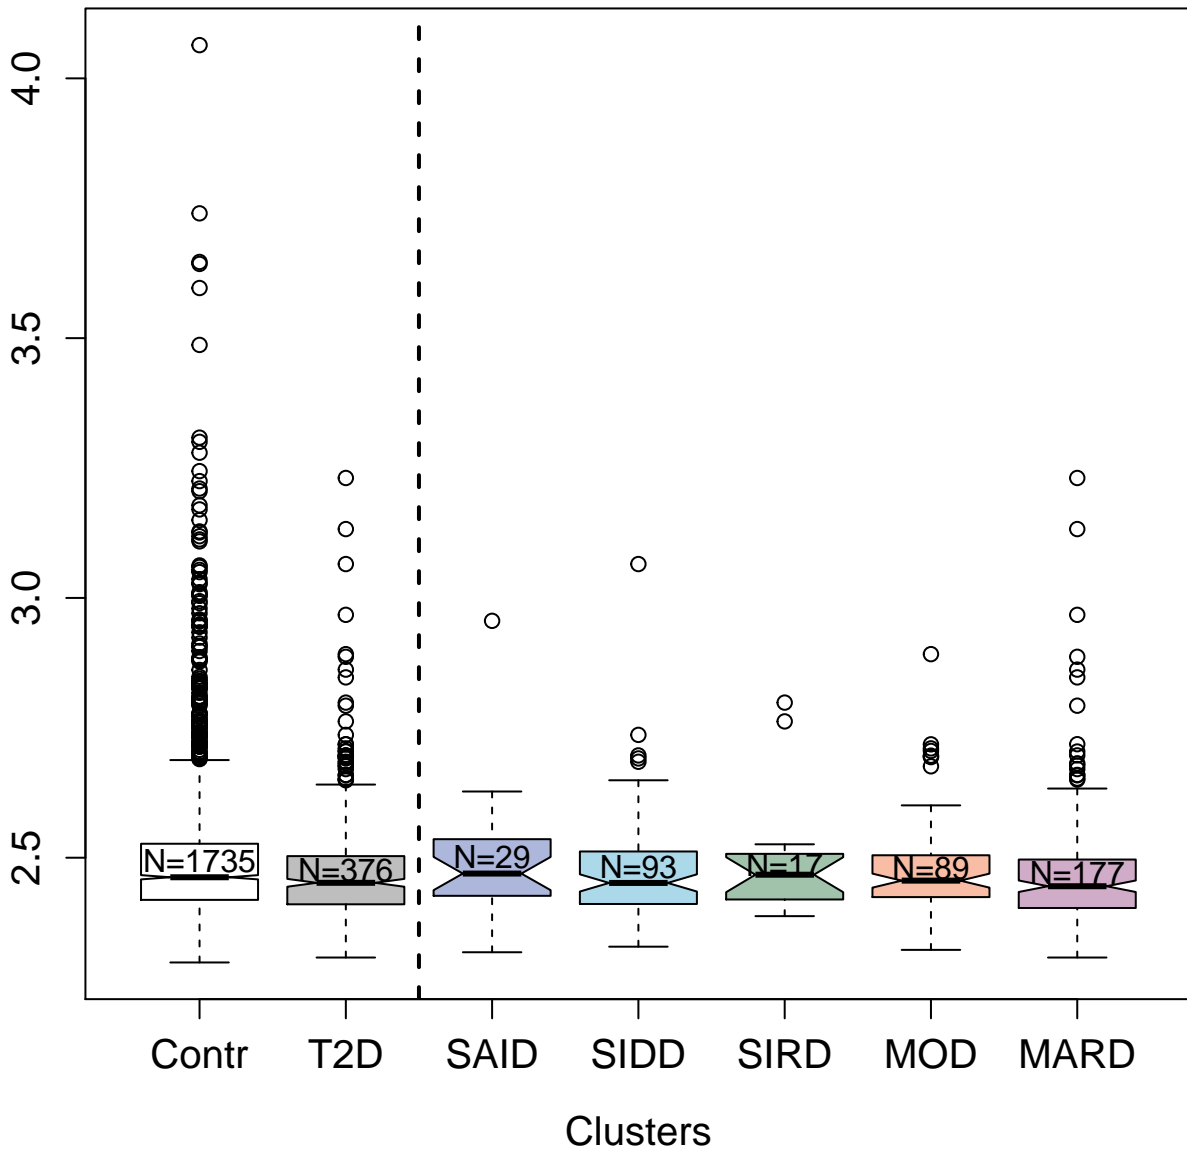

3070-1\_2 : Interleukin-2

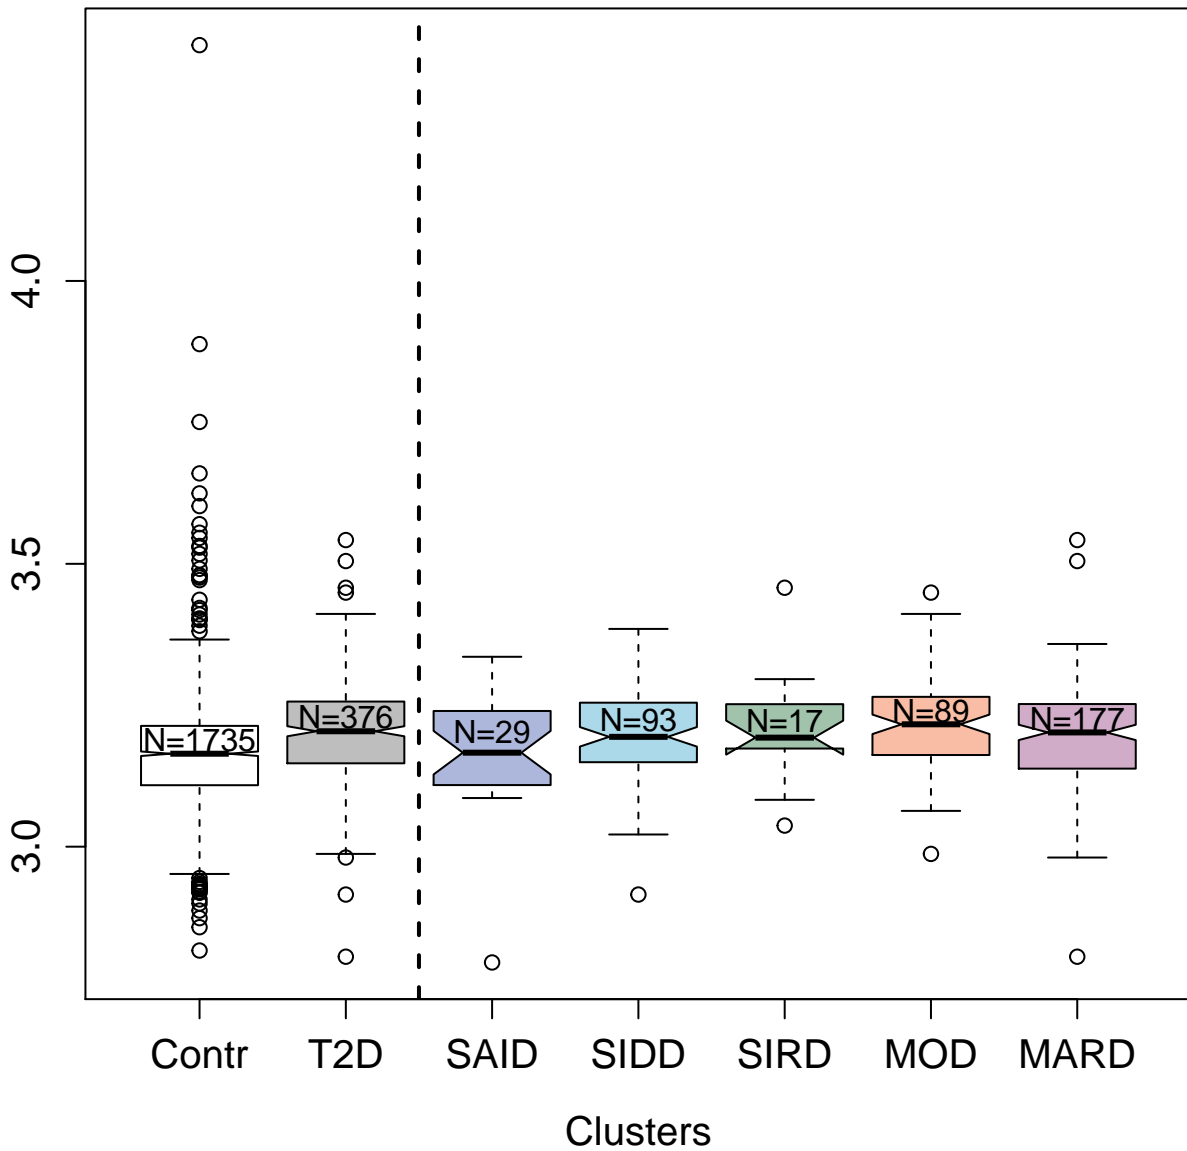

5879-51\_3 : Dynactin subunit 2

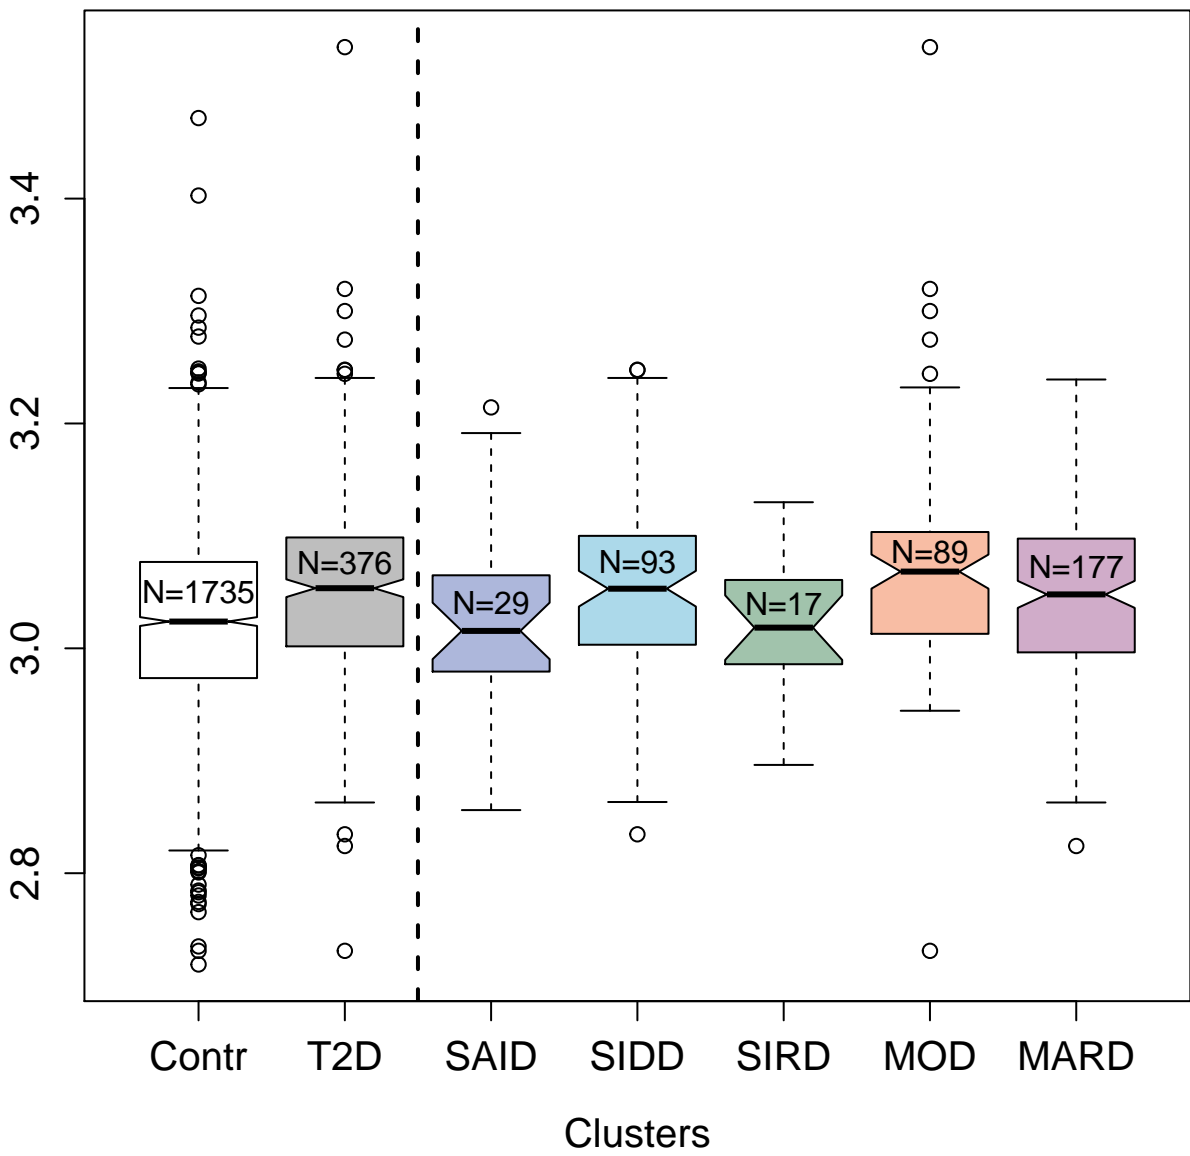

2952-75\_2 : Insulin-like growth factor I

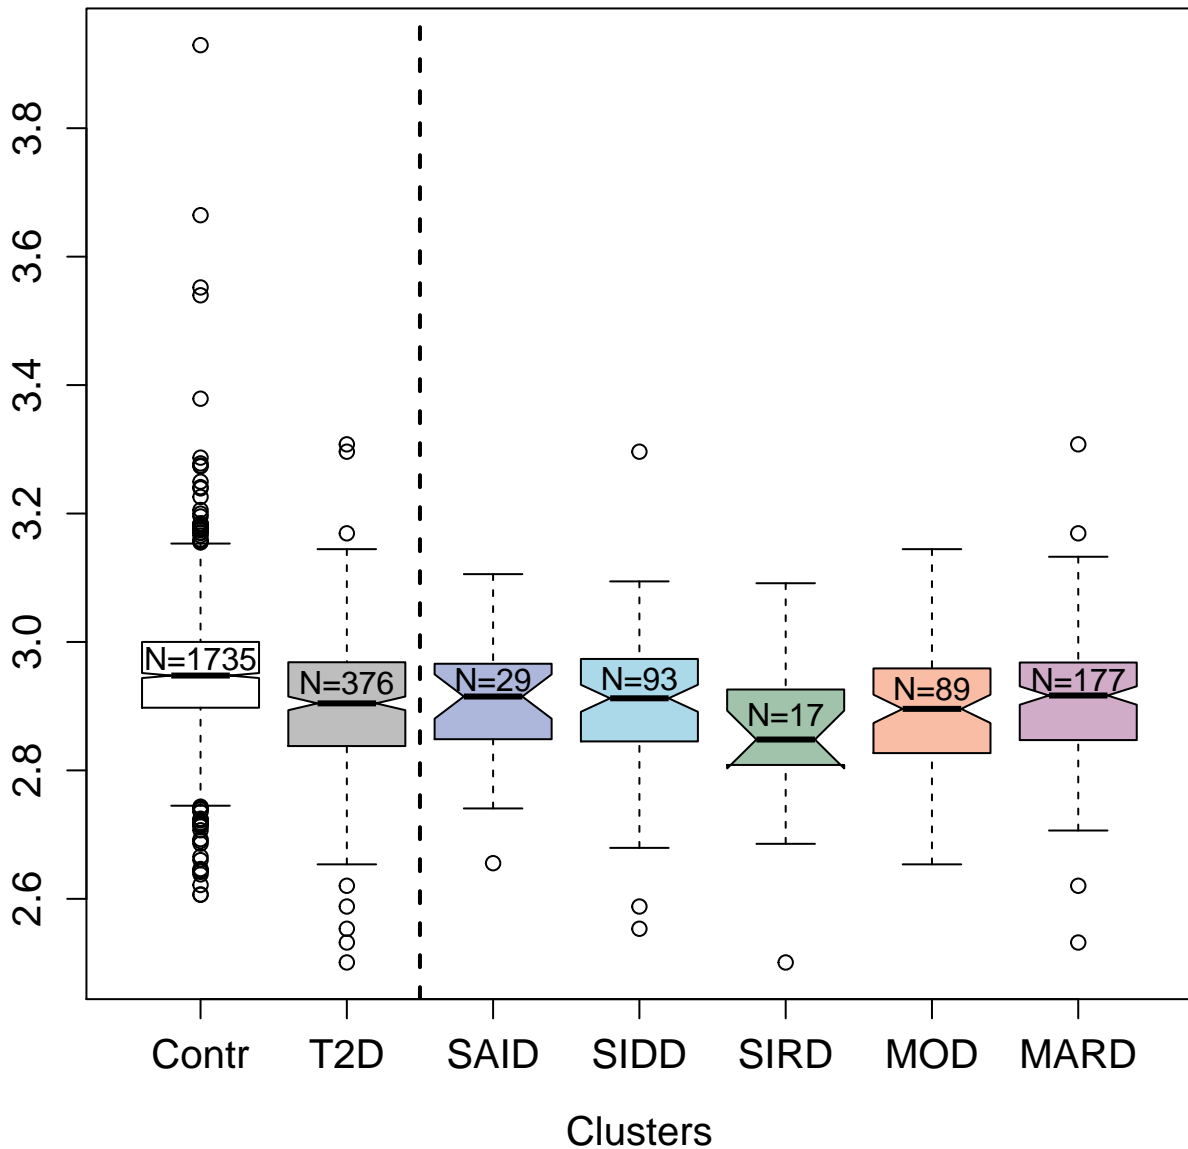

10356-21\_3 : Transcription factor AP-1

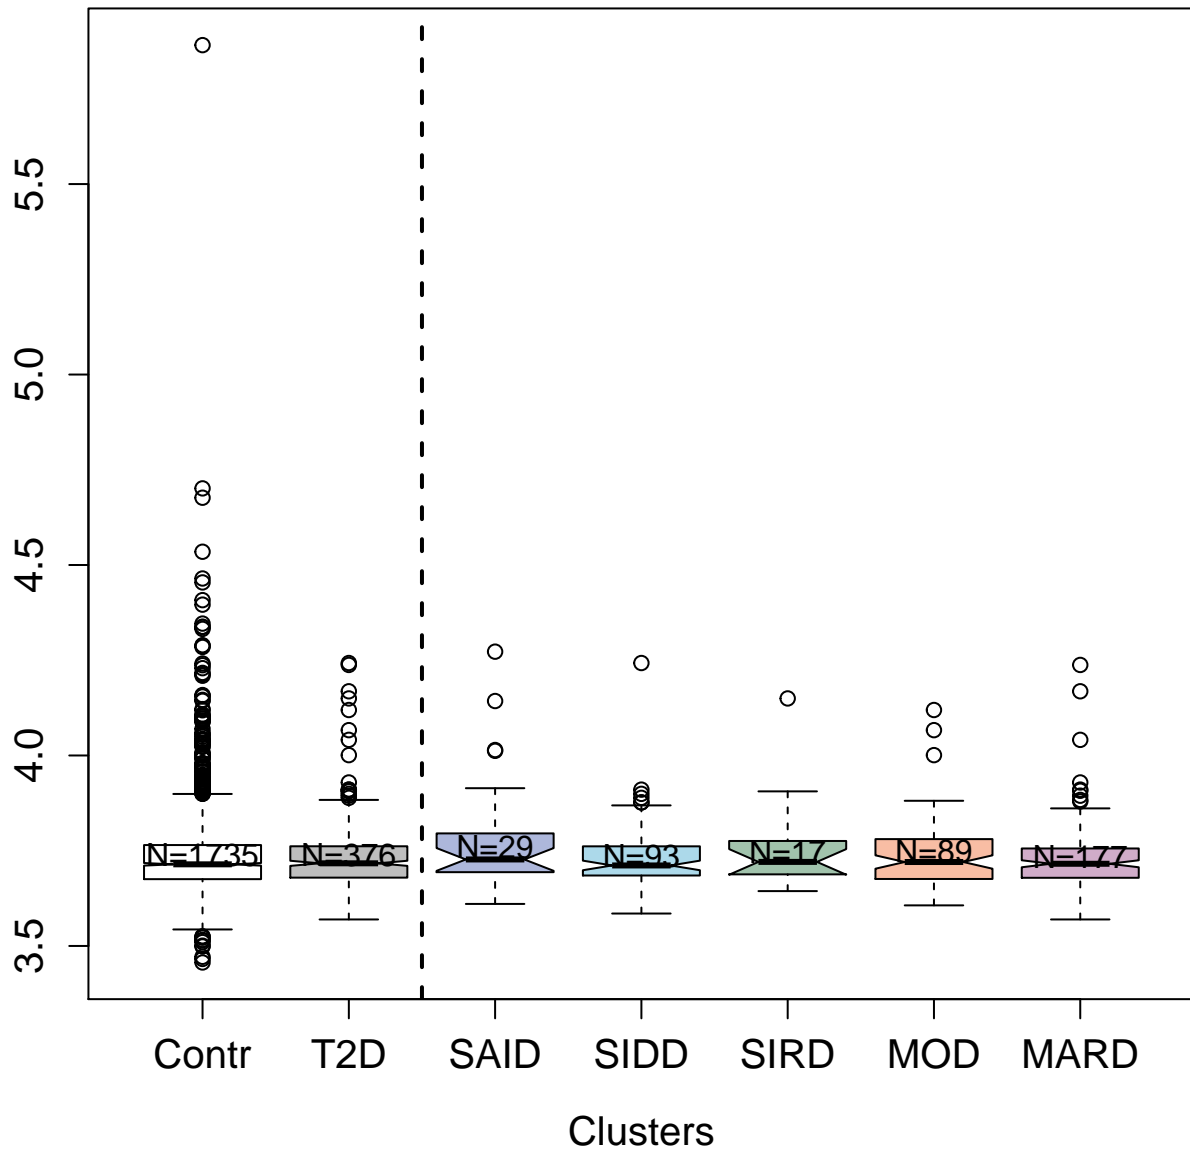

2981-9\_3 : Endothelial cell-selective adhesion molecule

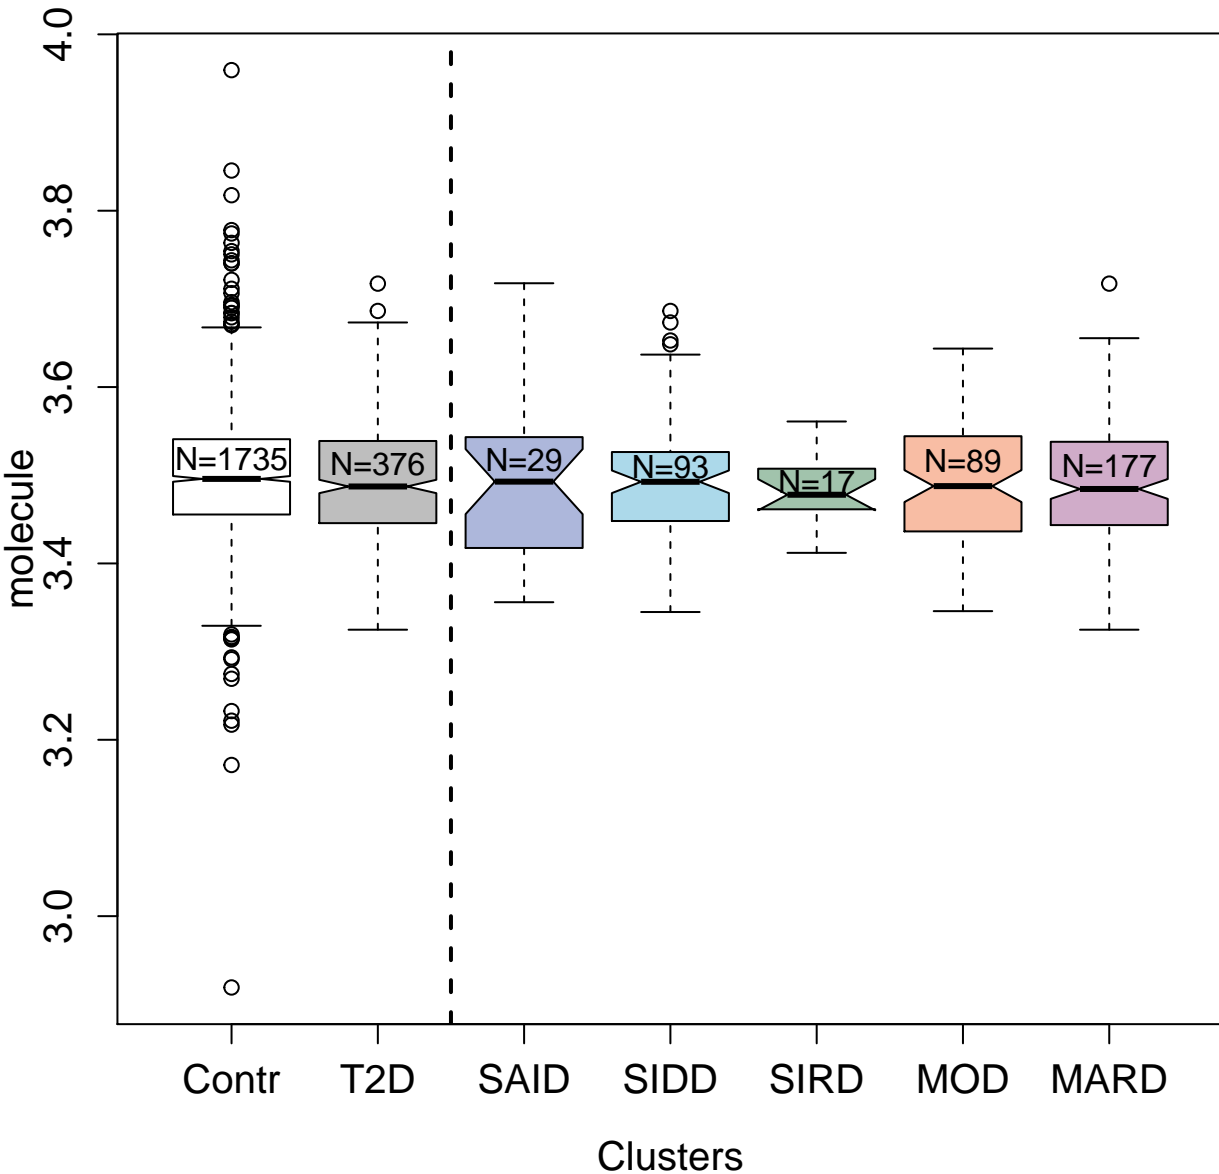

3606-2\_1 : Discoidin domain-containing receptor 2

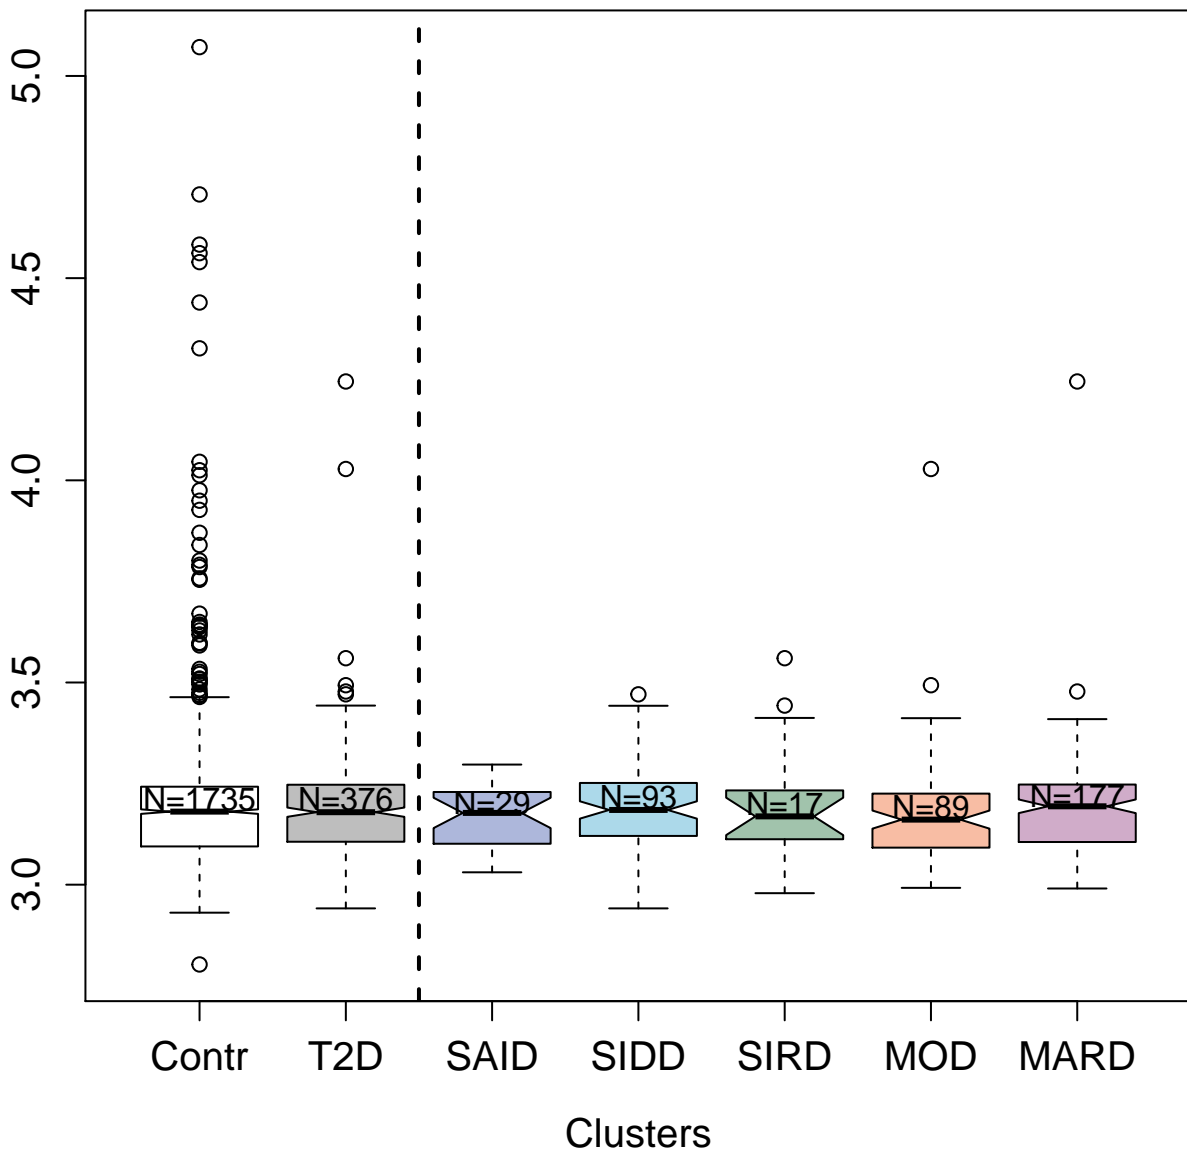

4988-49\_2 : Fibroblast growth factor receptor 4

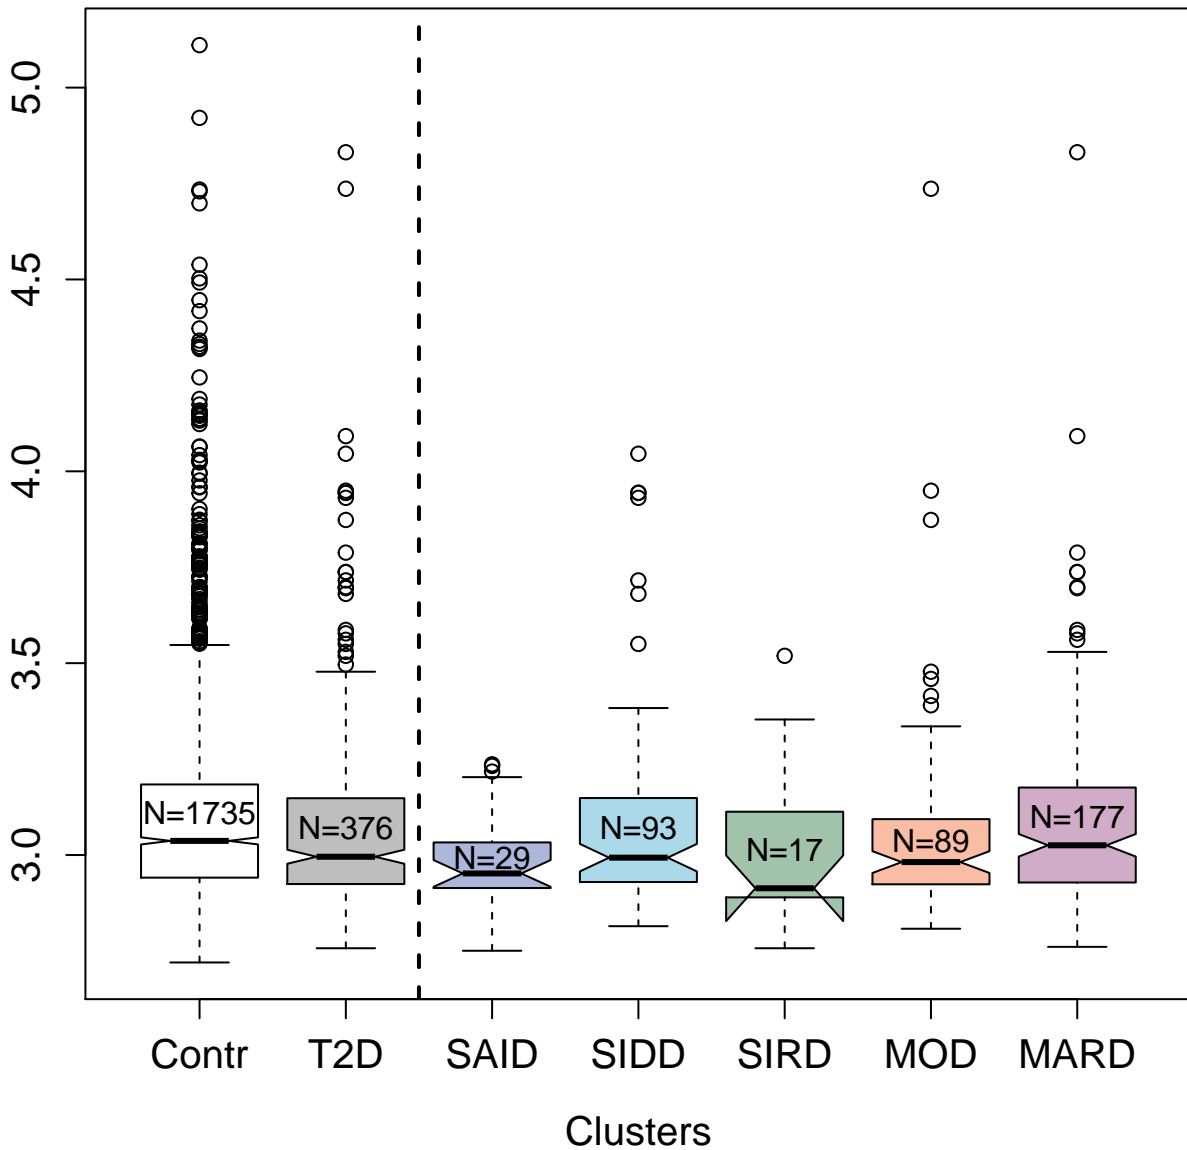



5359-65\_3 : Serine/threonine-protein kinase pim-1

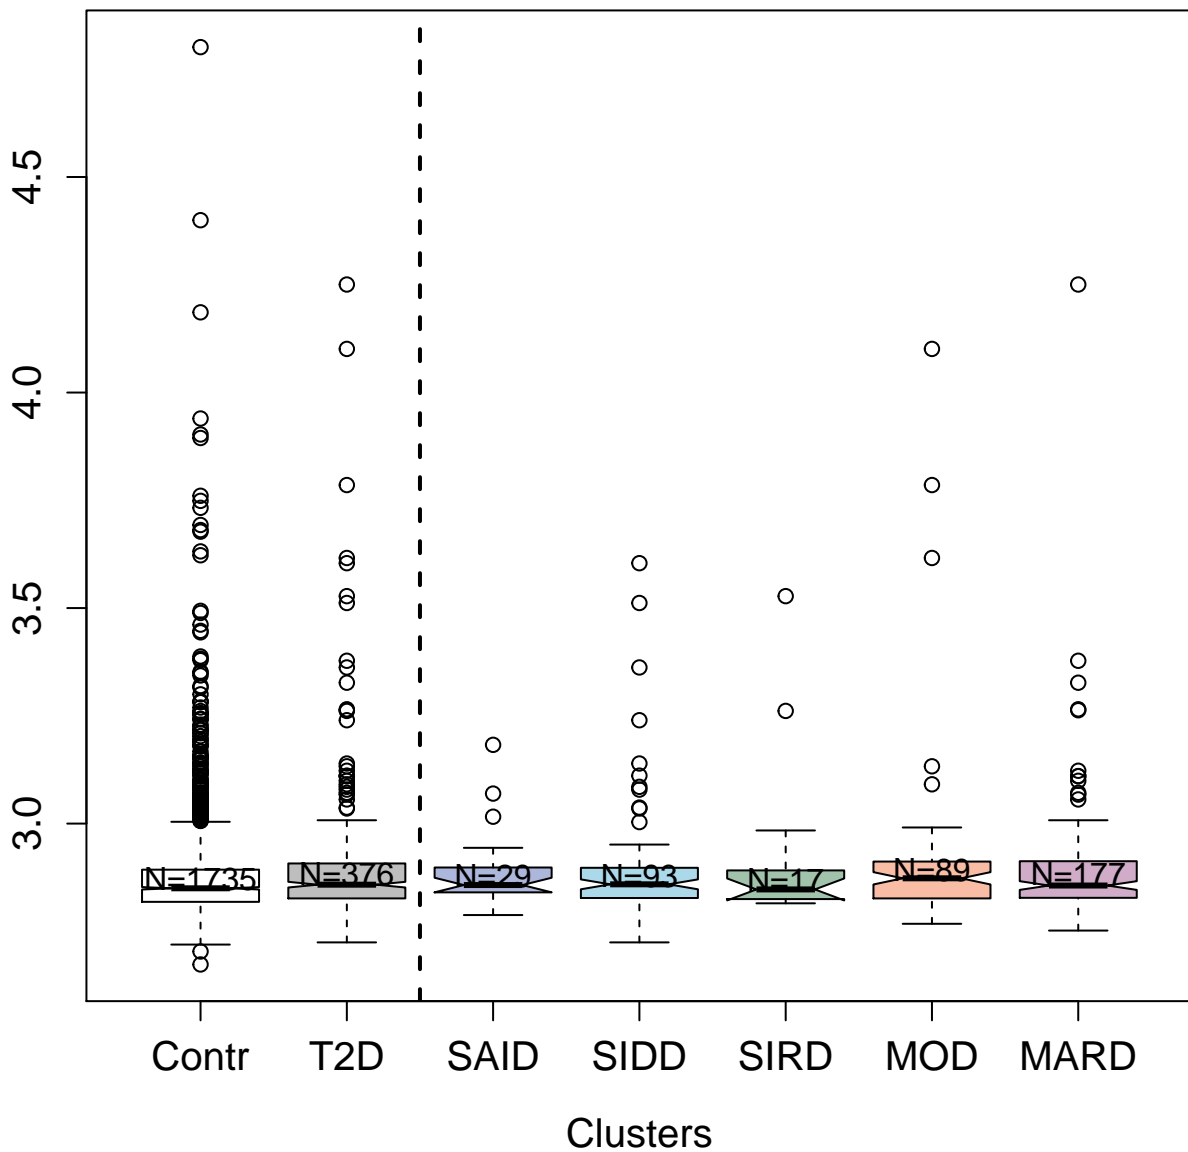

9196-8\_3 : Galectin-7

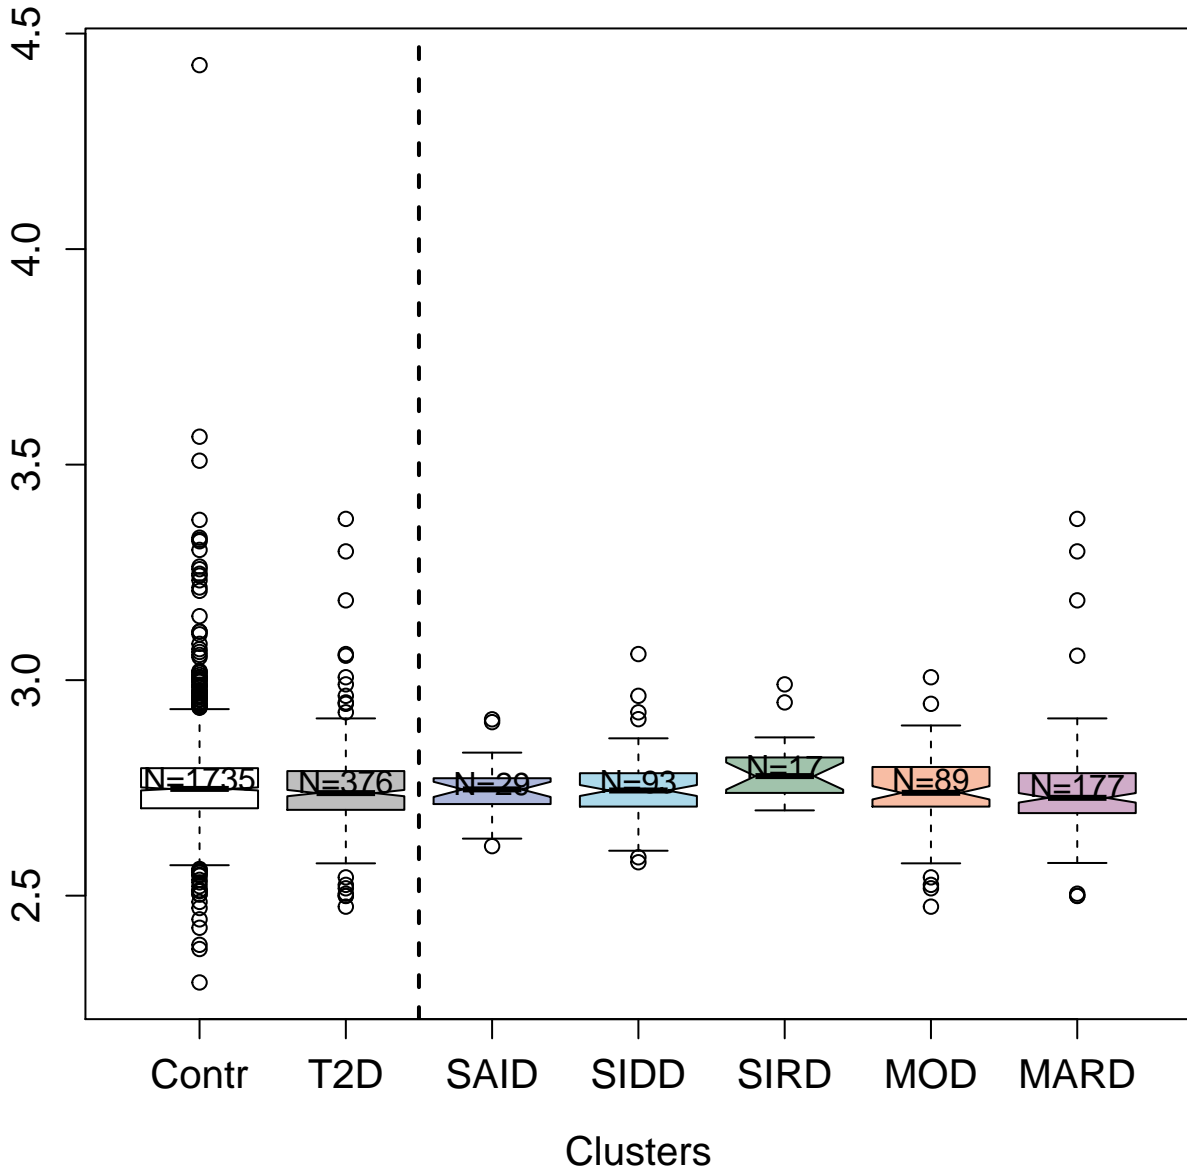

3029-52\_2 : CD209 antigen

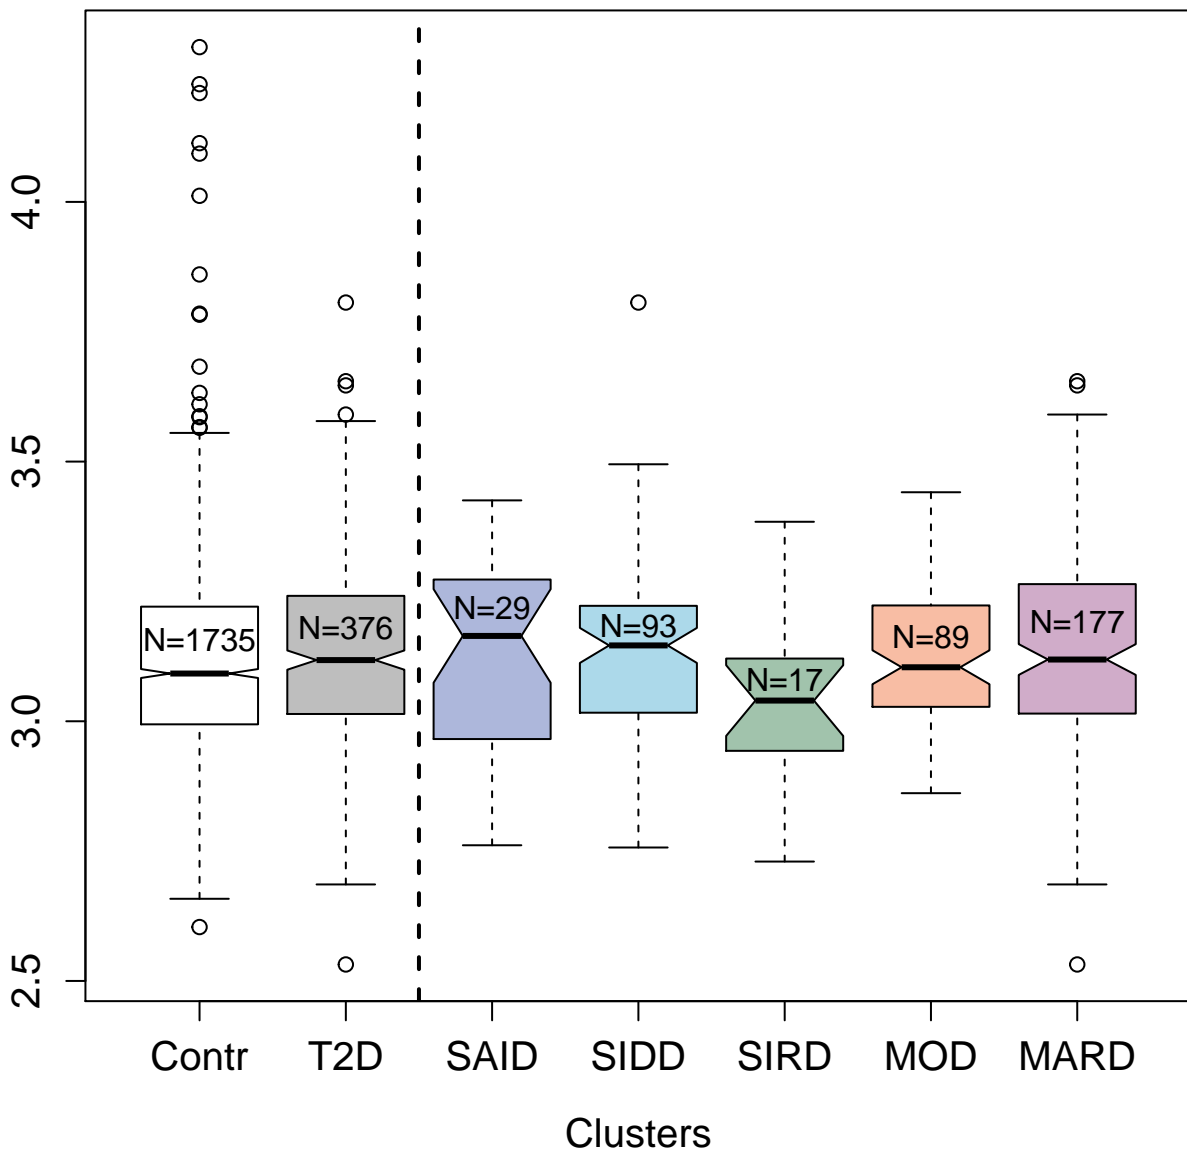

3339-33\_1 : Thrombospondin-2

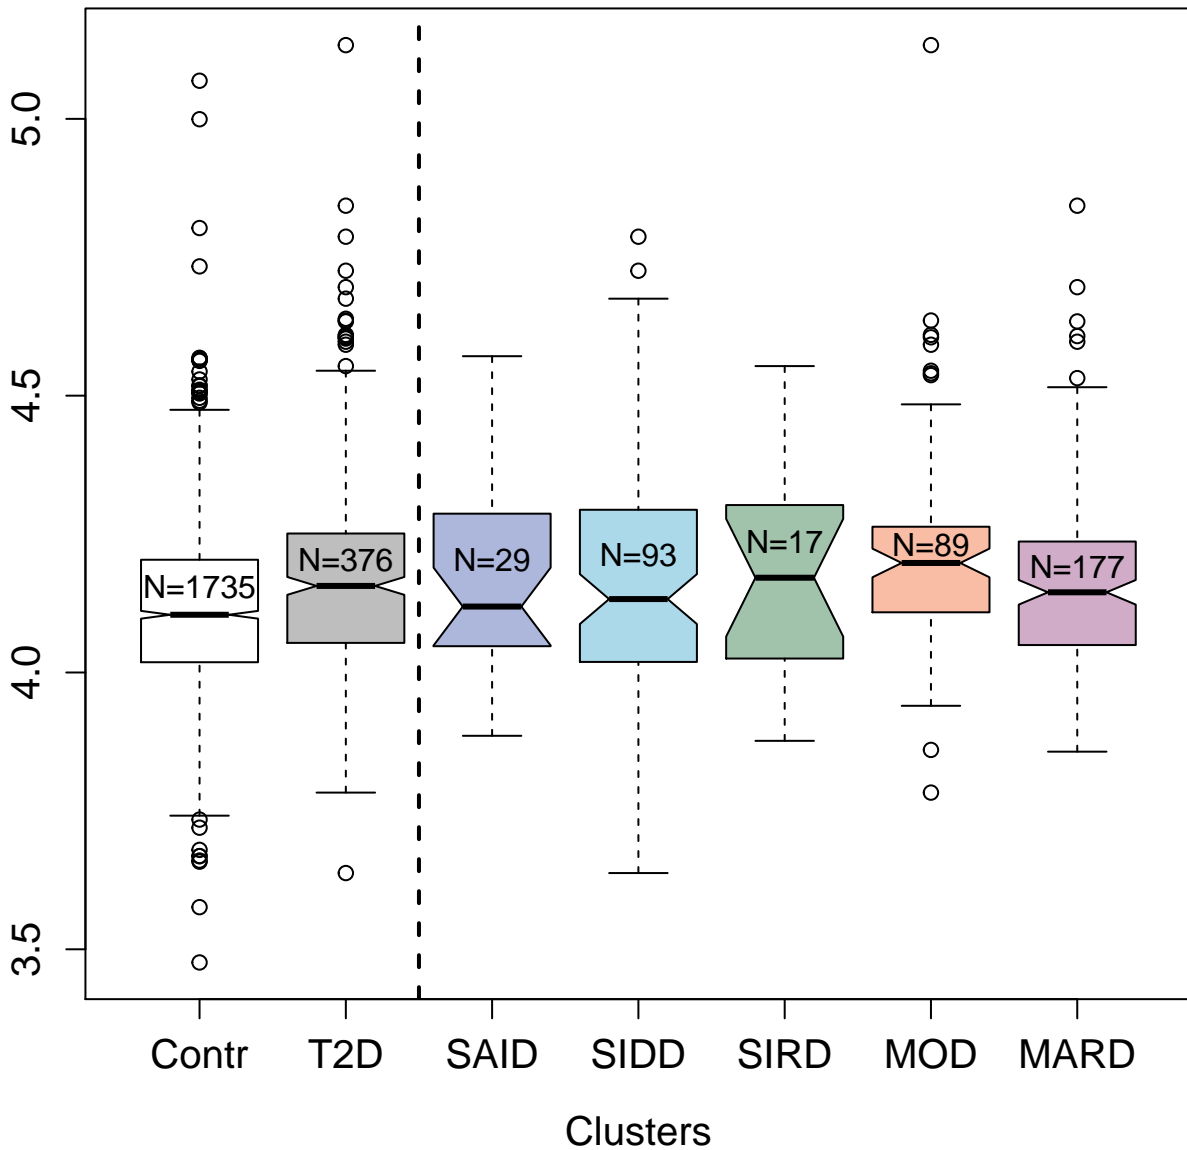

9191-8\_3 : Trefoil factor 2

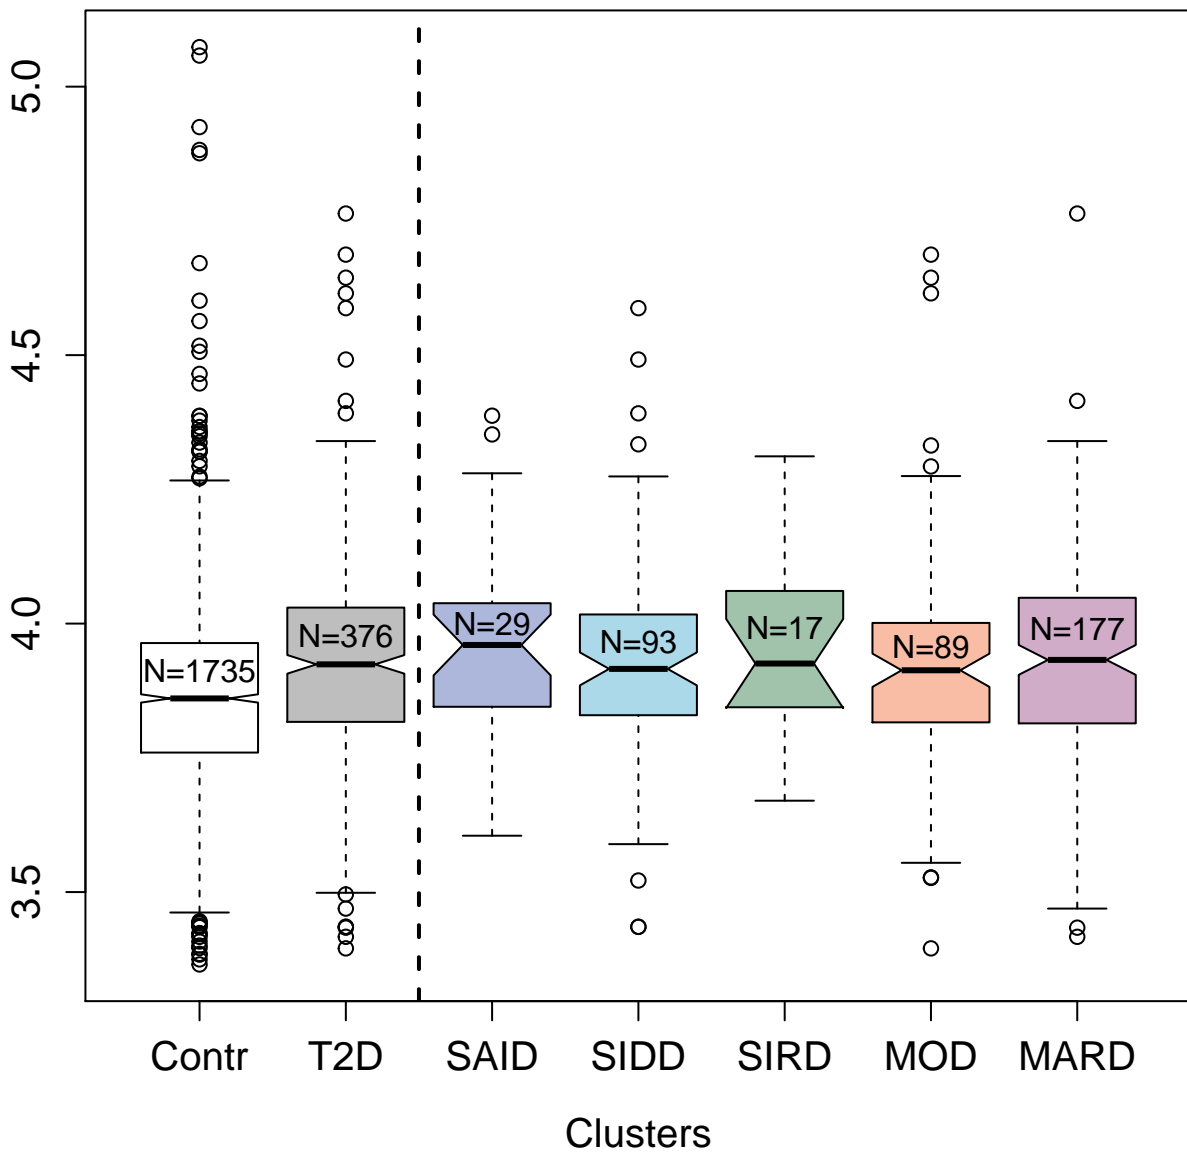

2211-9\_6 : Metalloproteinase inhibitor 1

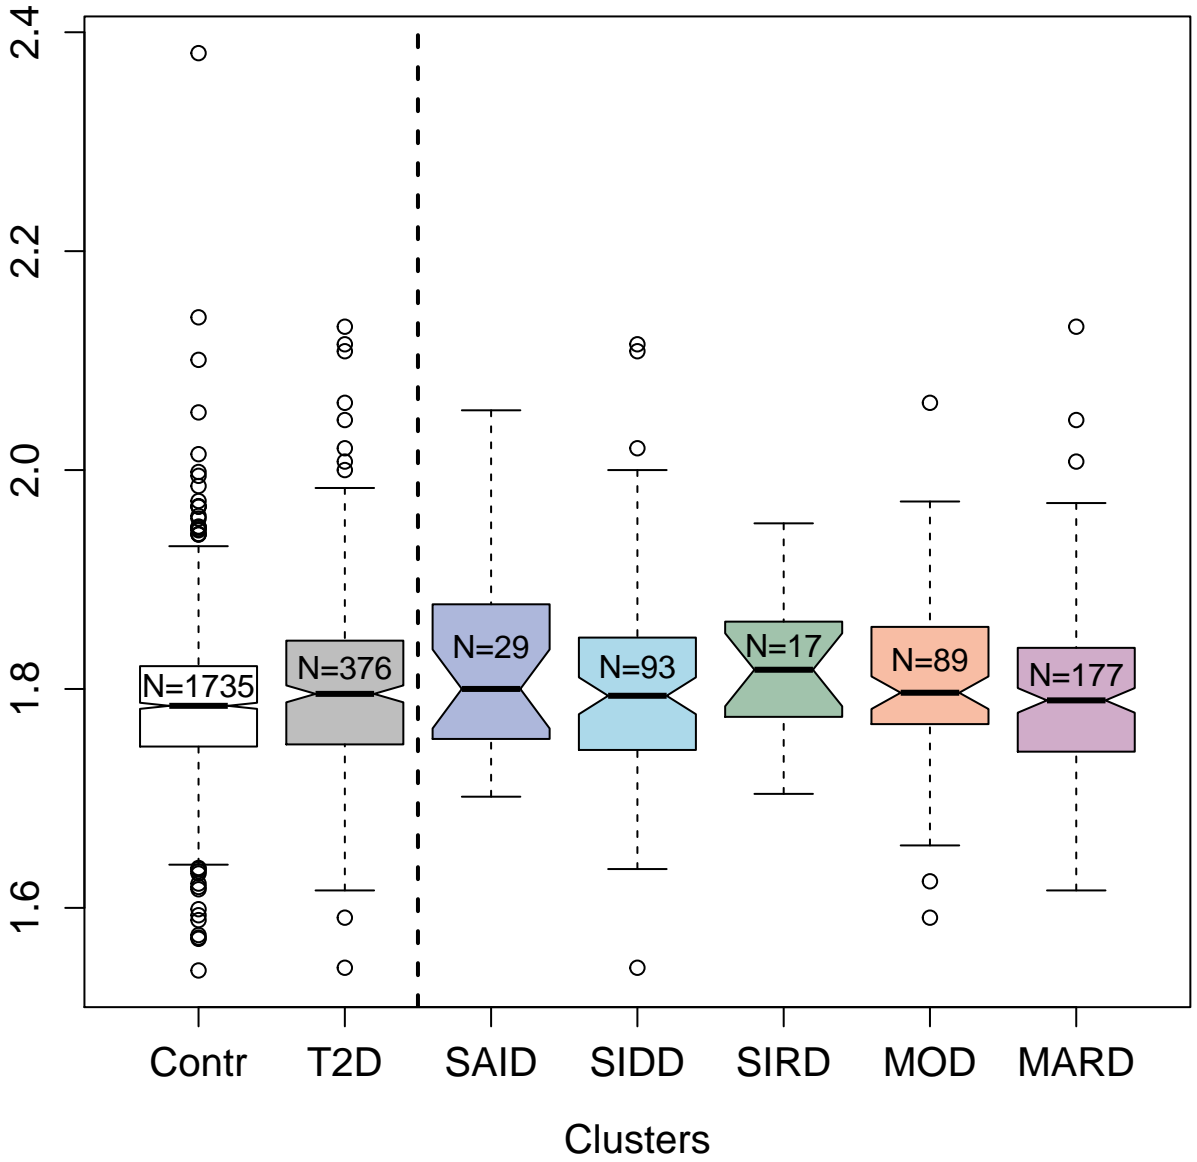

3676-15\_3 : Cation-independent  
mannose-6-phosphate receptor

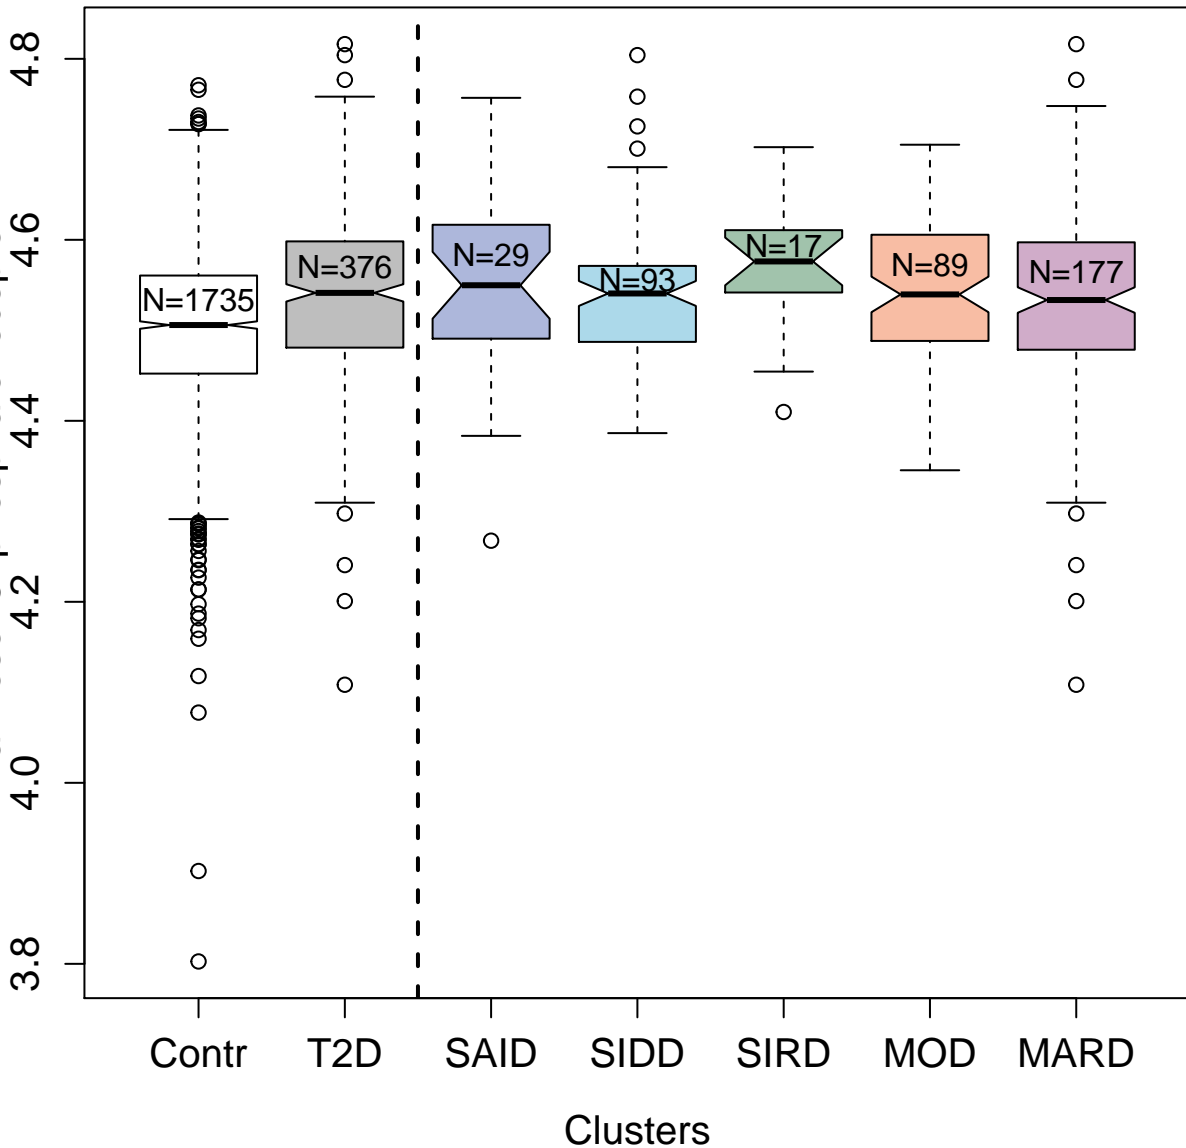

3685-53\_1 : Membrane frizzled-related protein

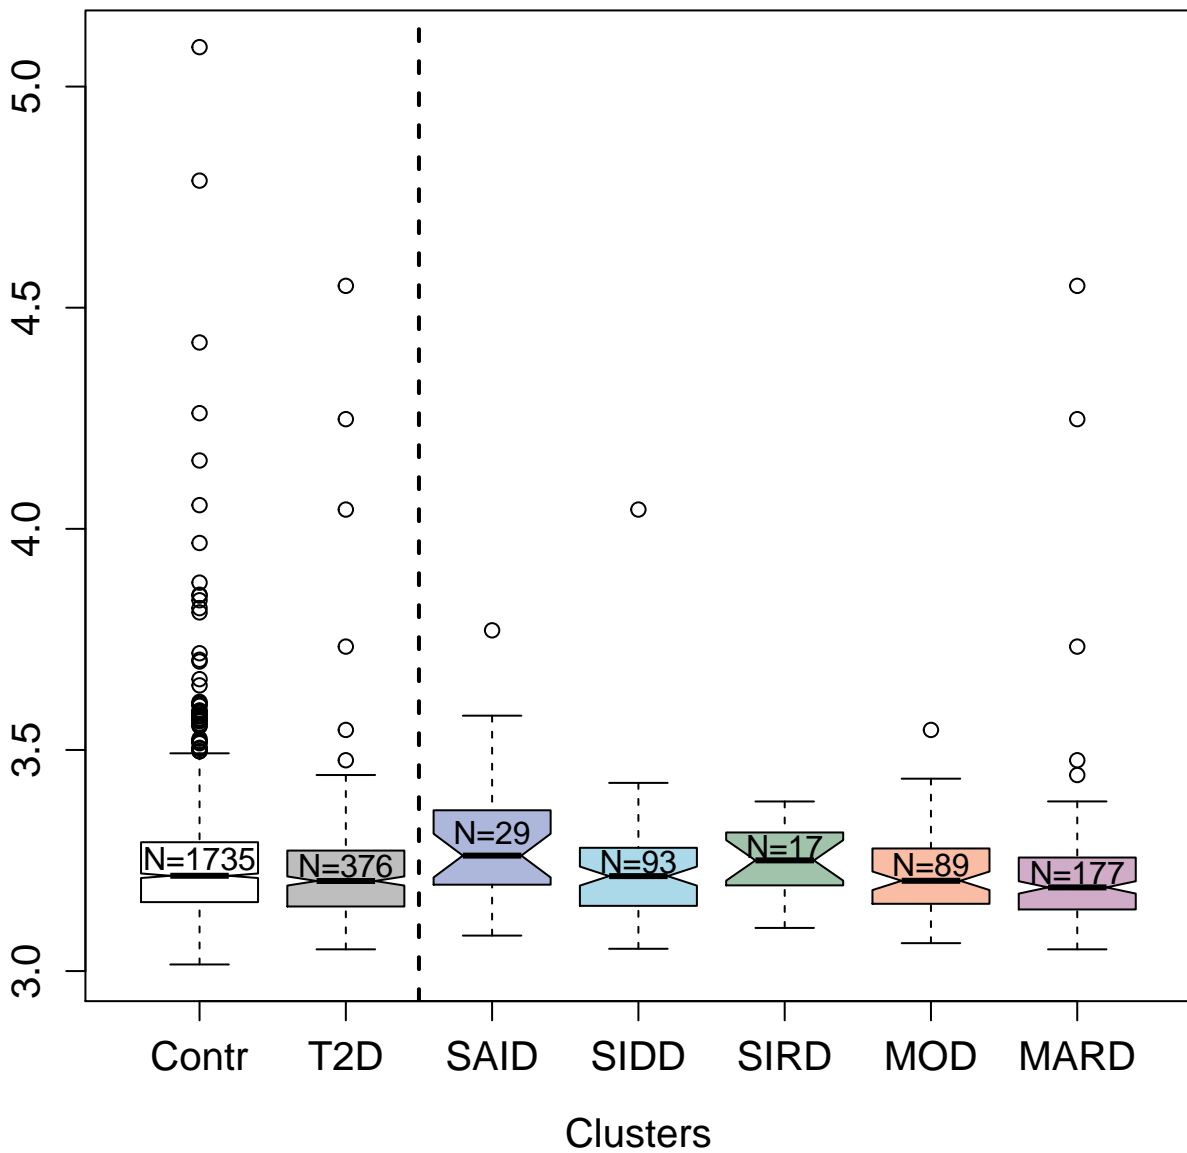



3600-2\_3 : Chitotriosidase-1

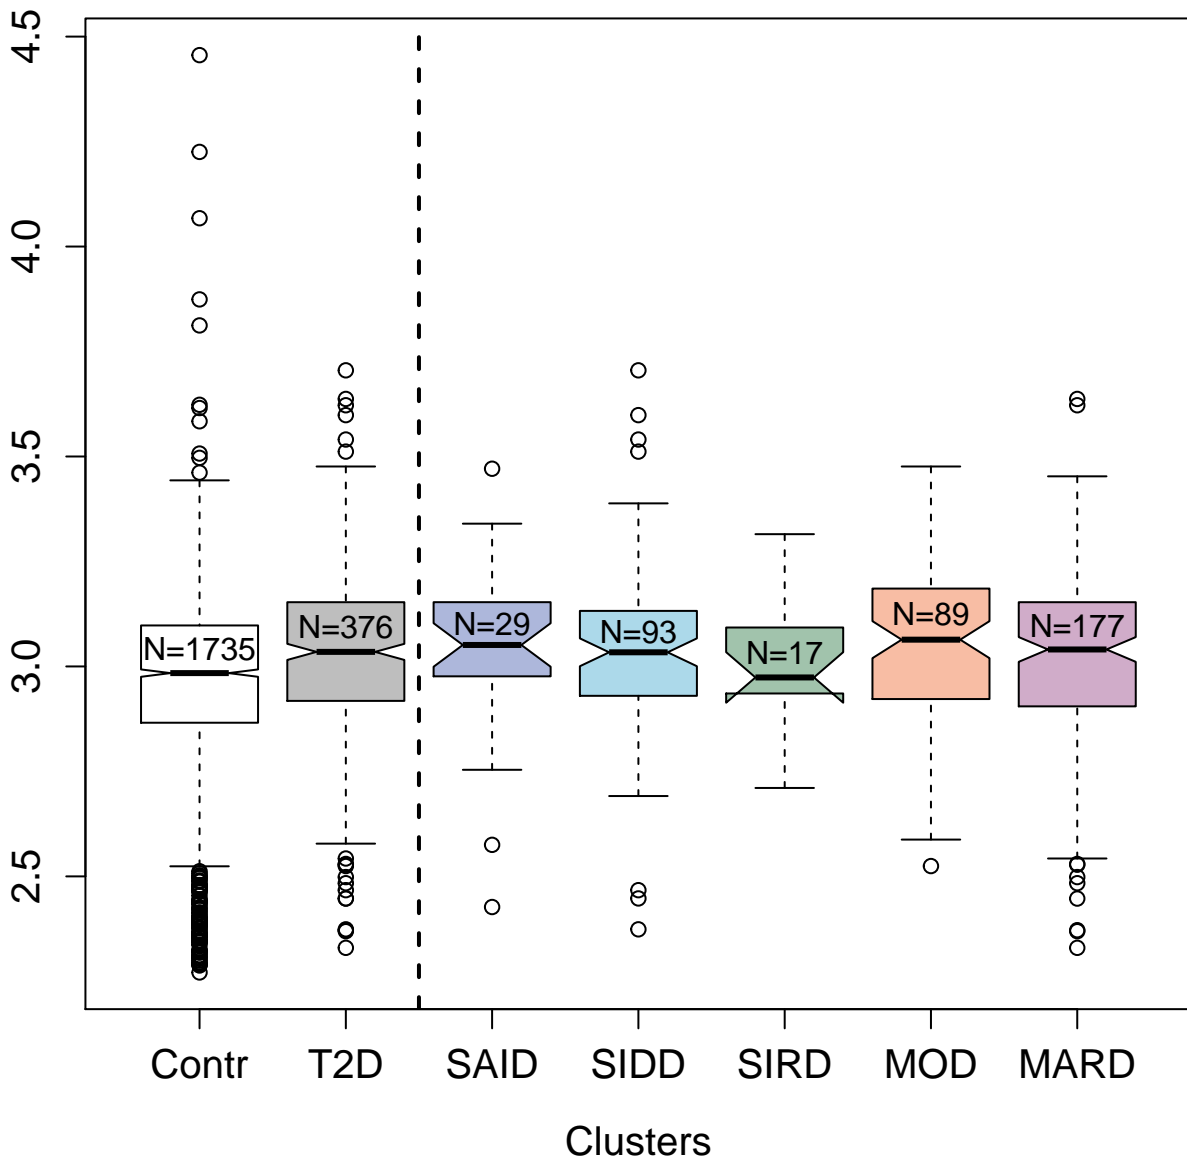

3053-49\_2 : Fms-related tyrosine kinase 3 ligand

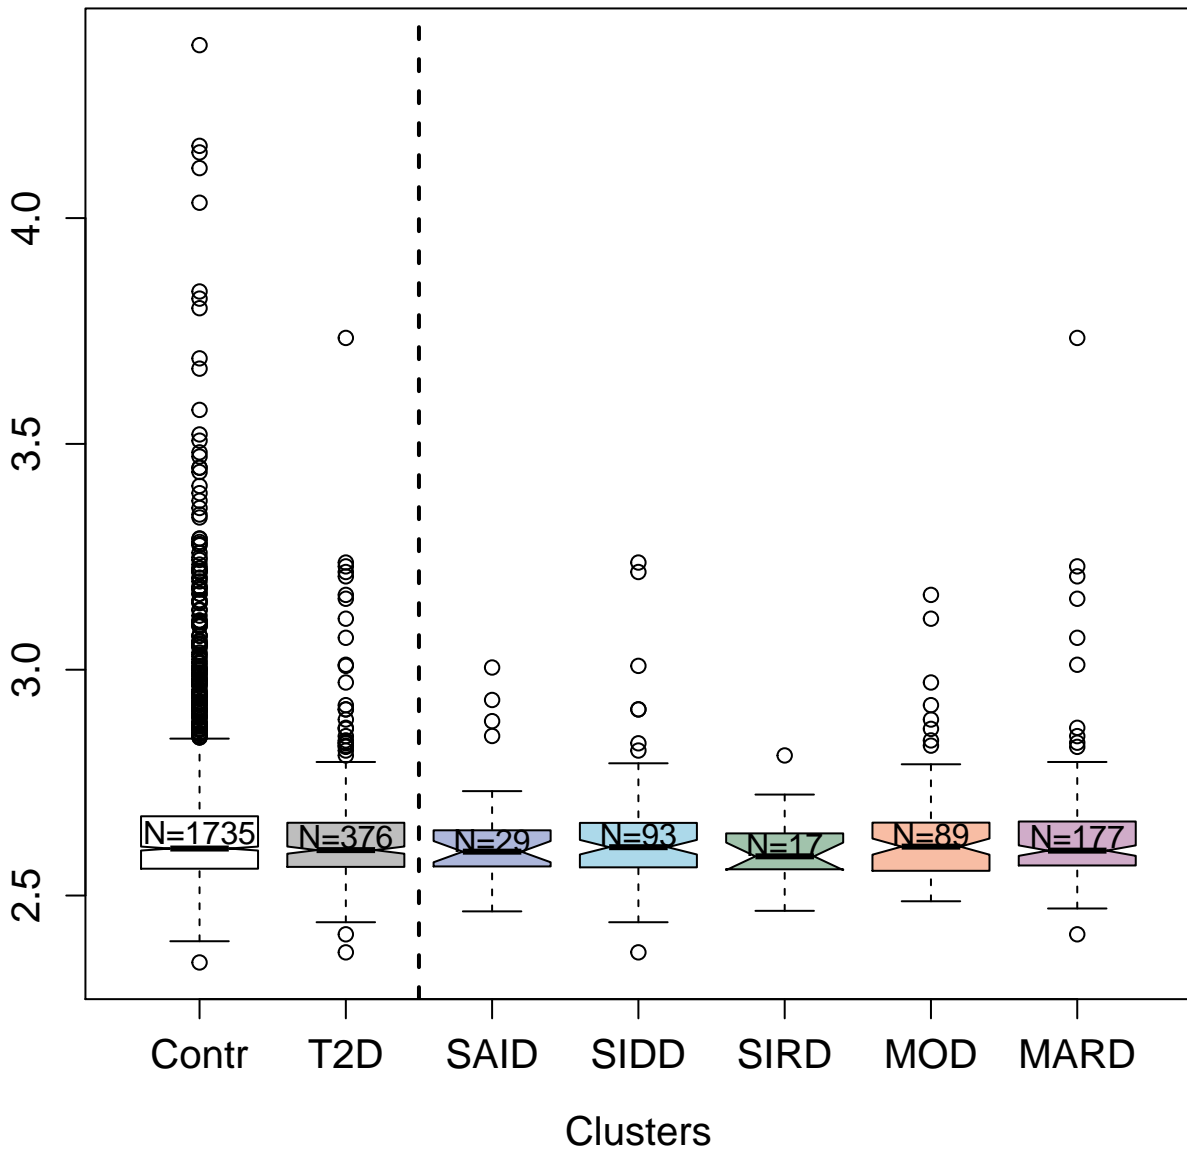

3082-9\_2 : NKG2D ligand 2

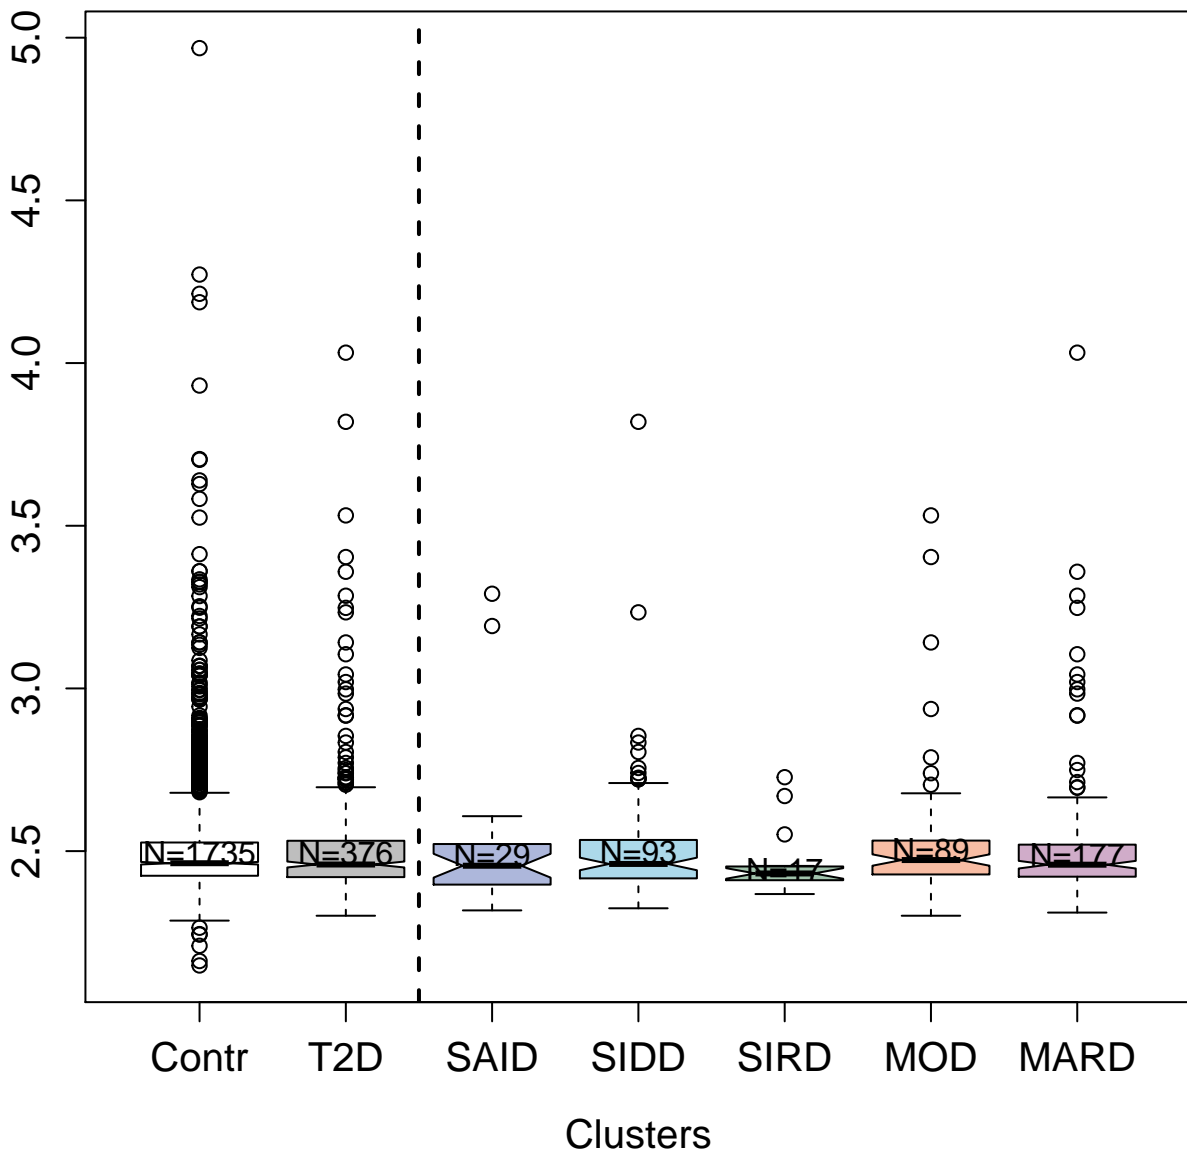

2719-3\_4 : Granulocyte colony-stimulating factor receptor

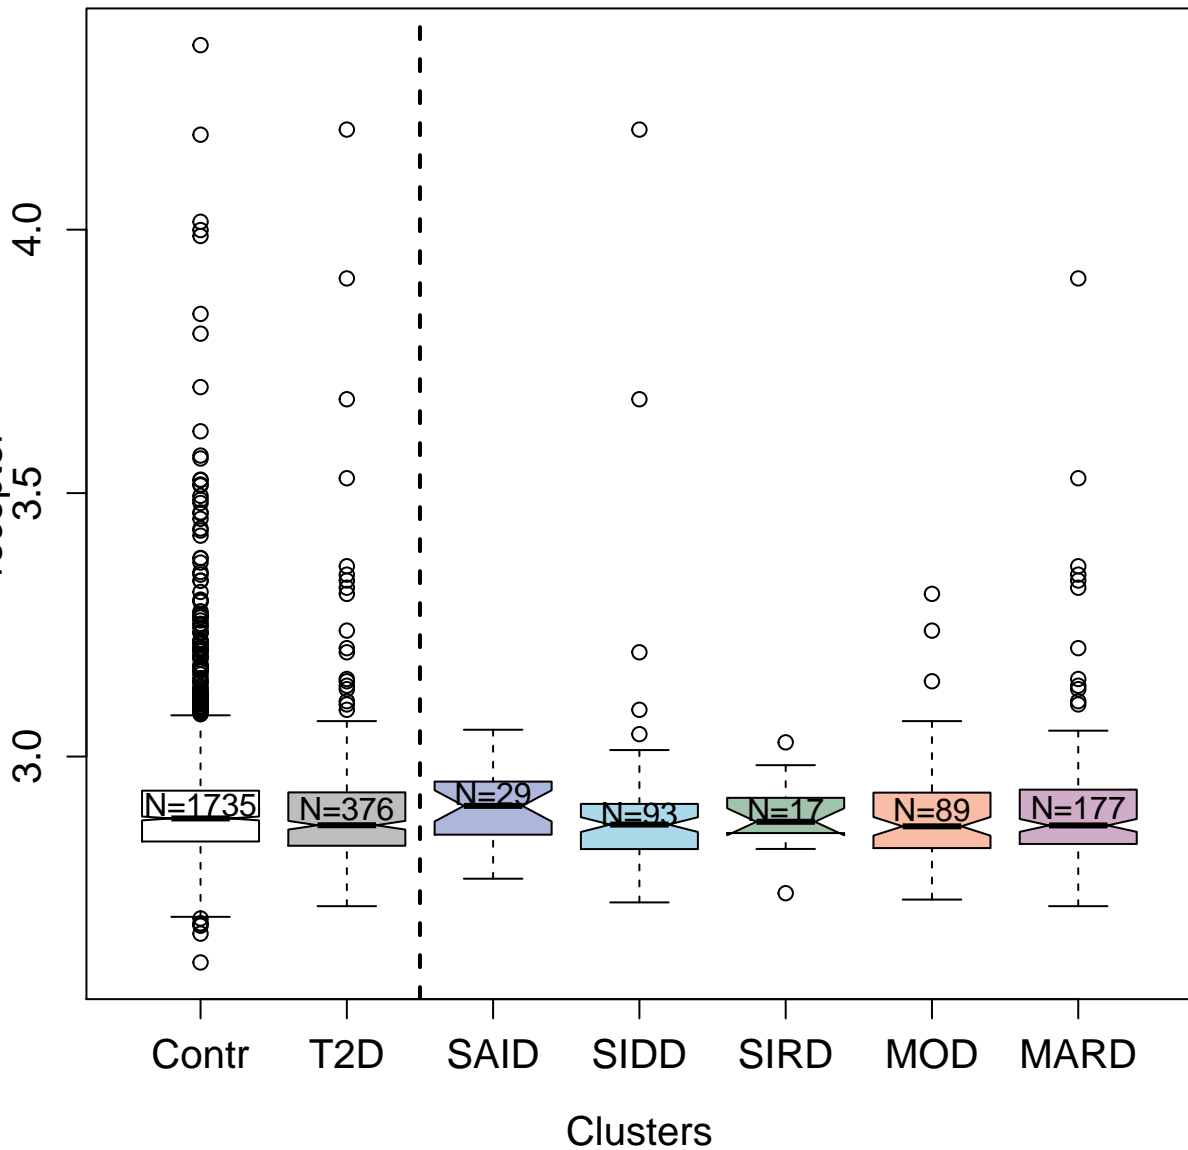

13107-9\_3 : Ly6/PLAUR domain-containing protein 3

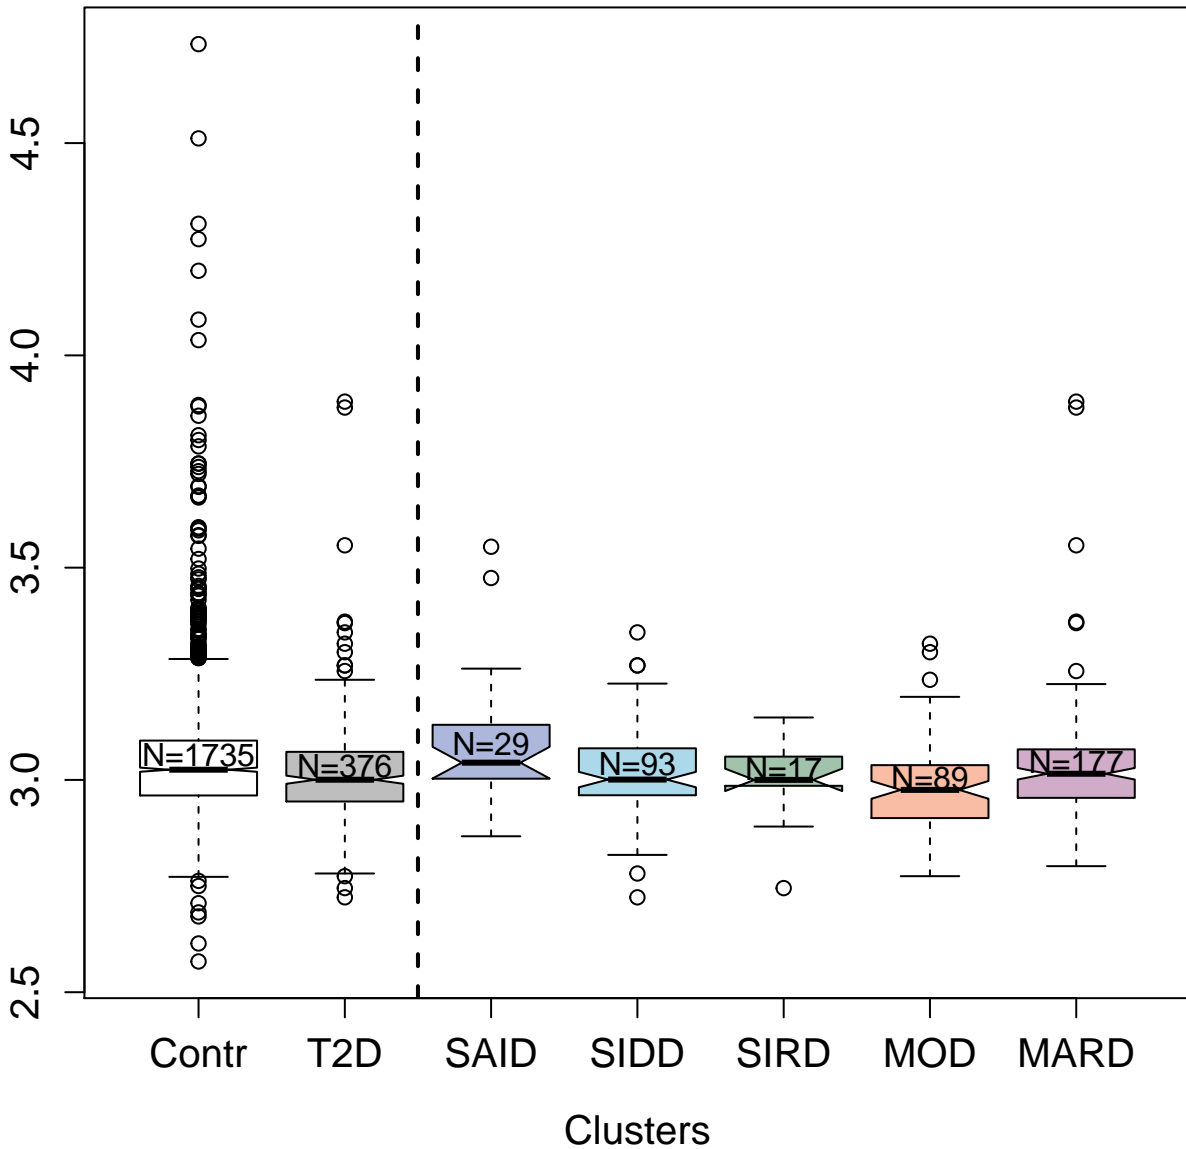

8476-11\_3 : Chromogranin-A

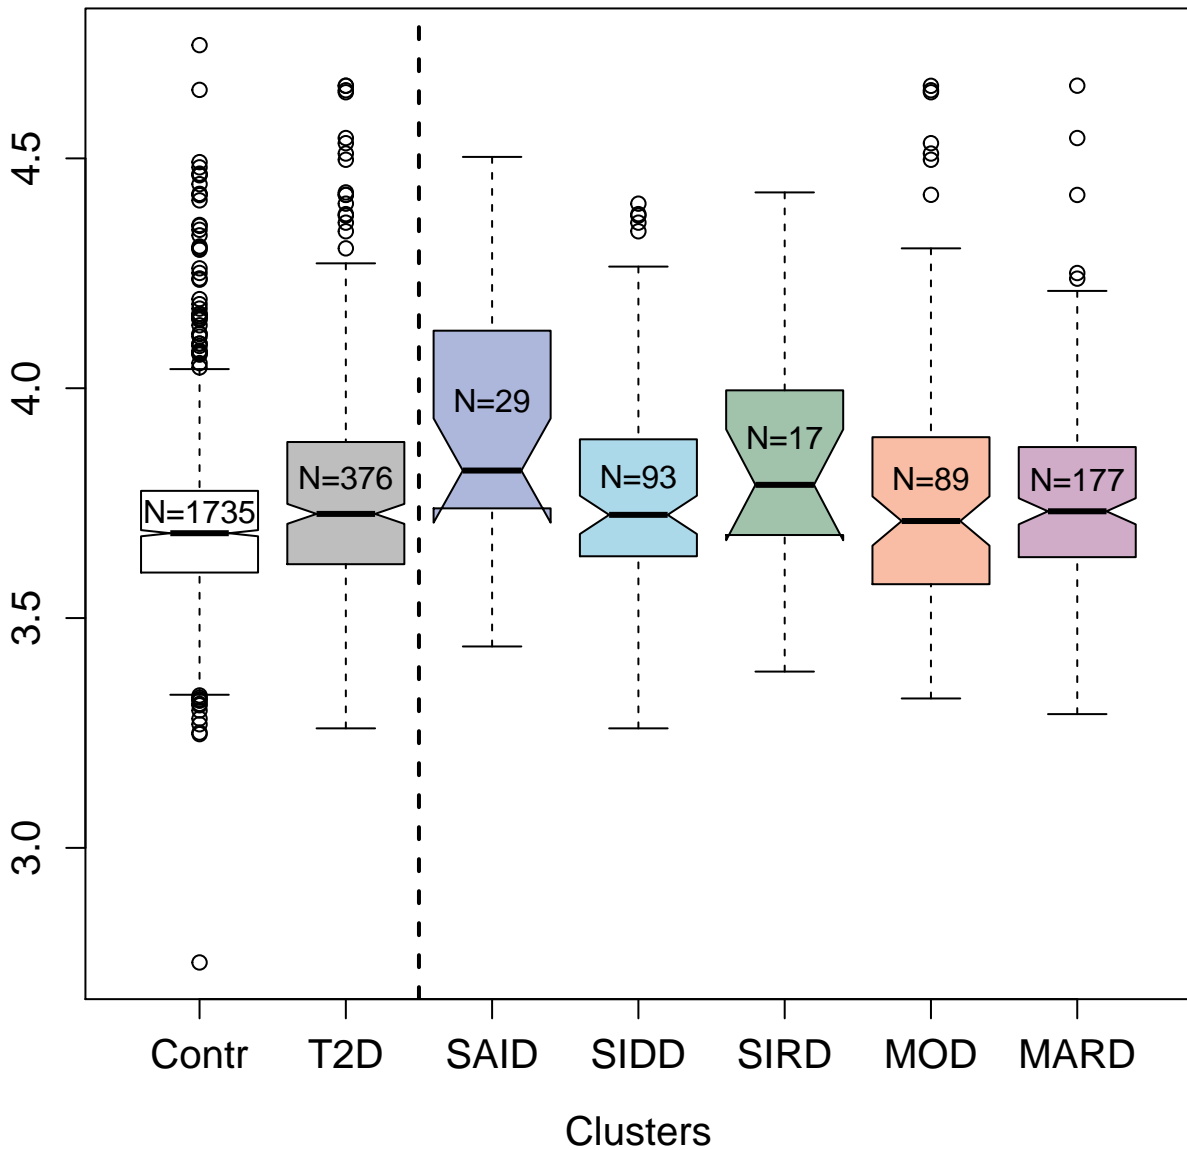

5312-49\_3 : Apolipoprotein E (isoform E2)

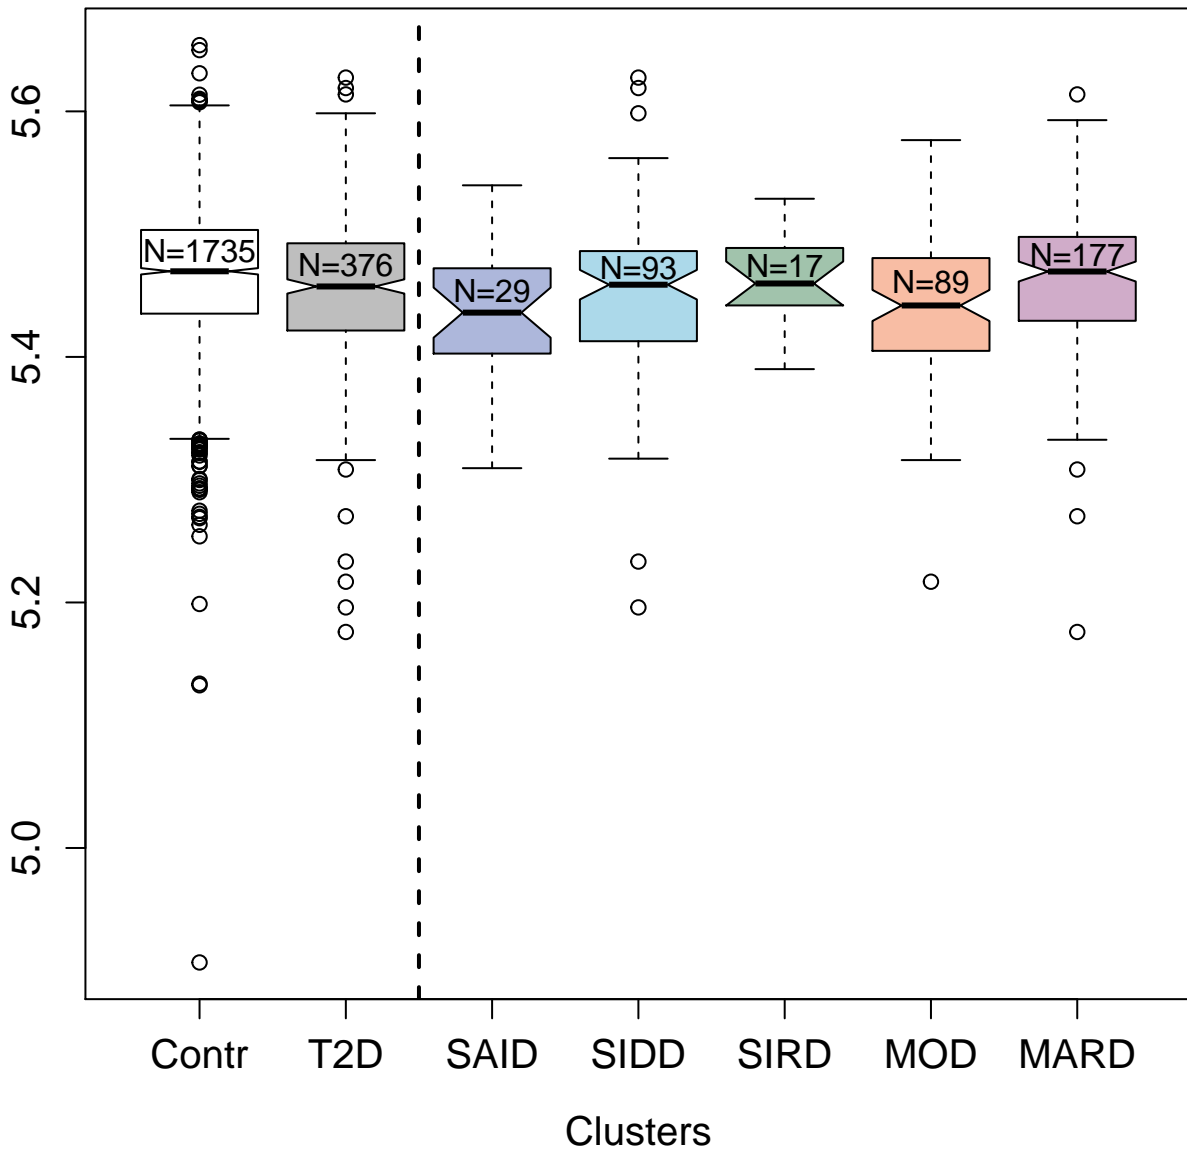

3520-58\_1 : Transforming growth factor beta-3

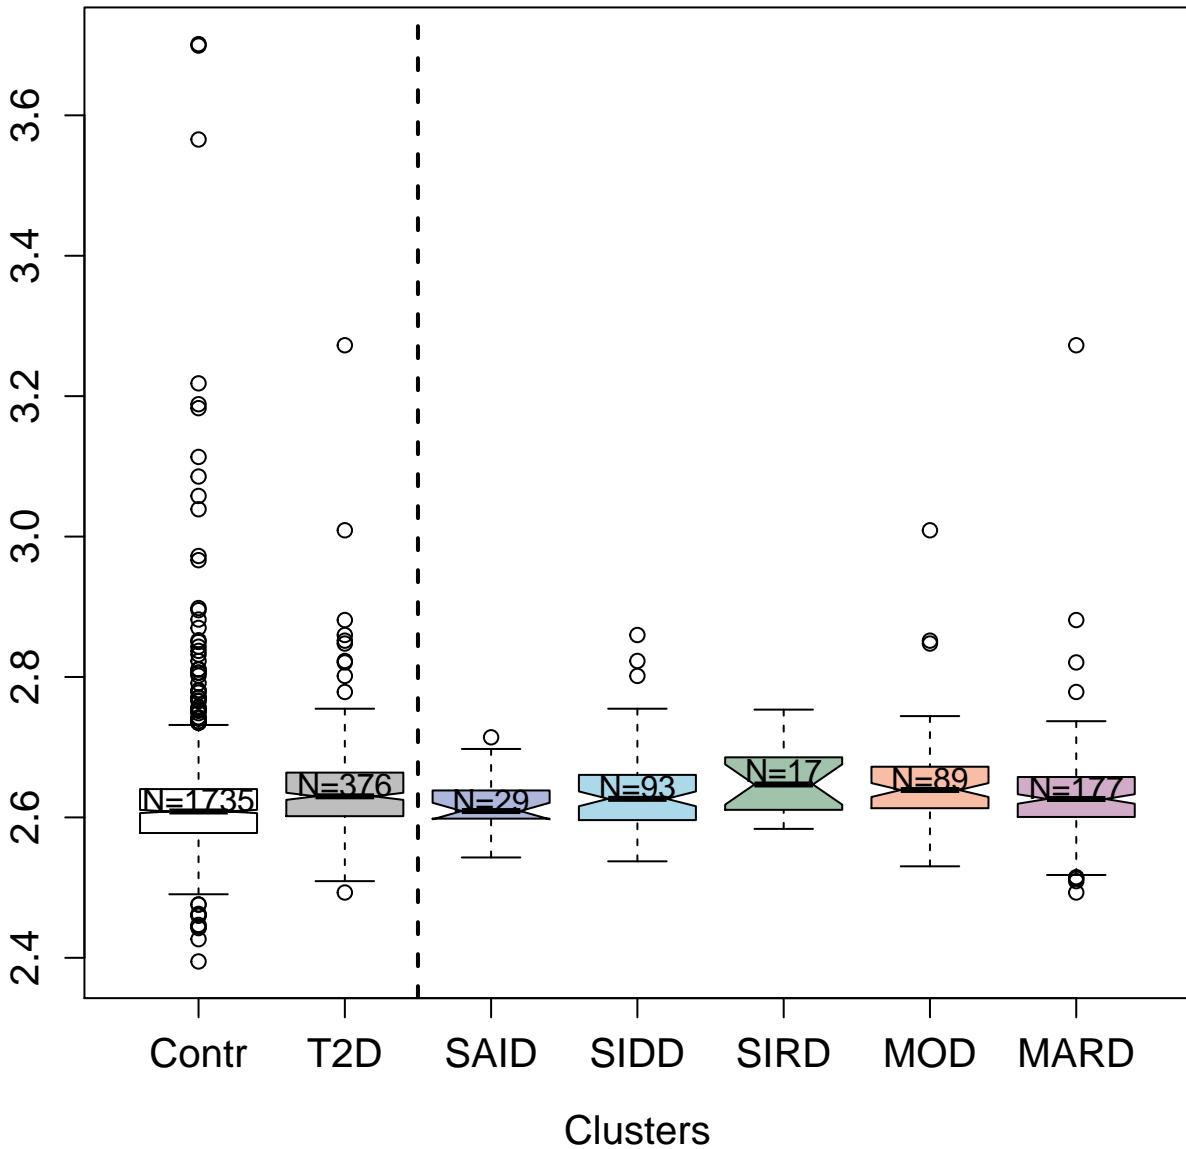



2704-74\_1 : Tumor necrosis factor receptor  
superfamily member 13B

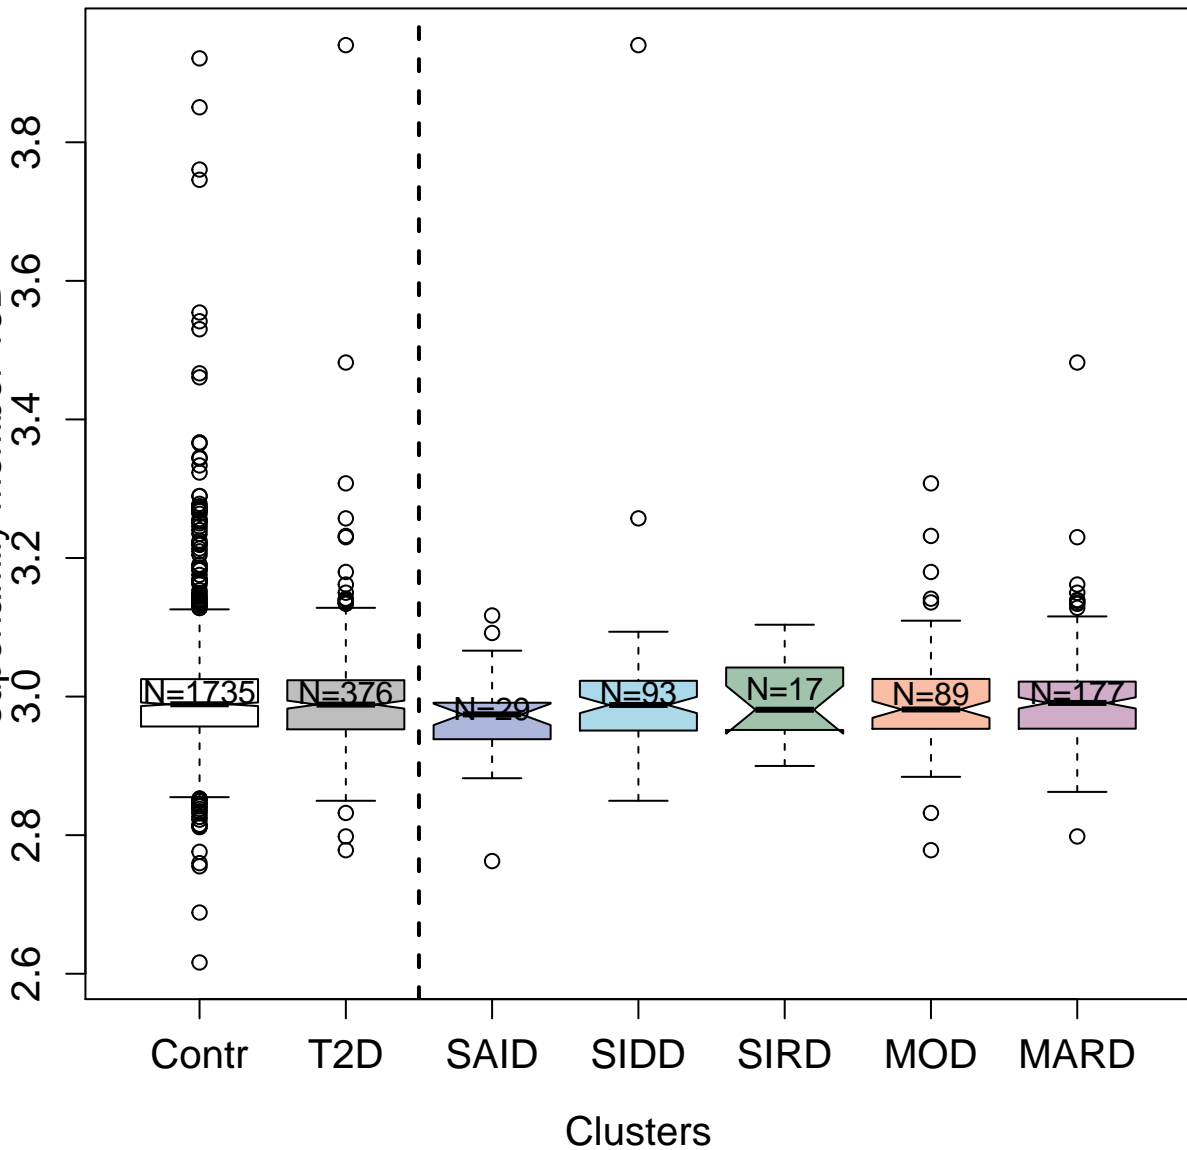

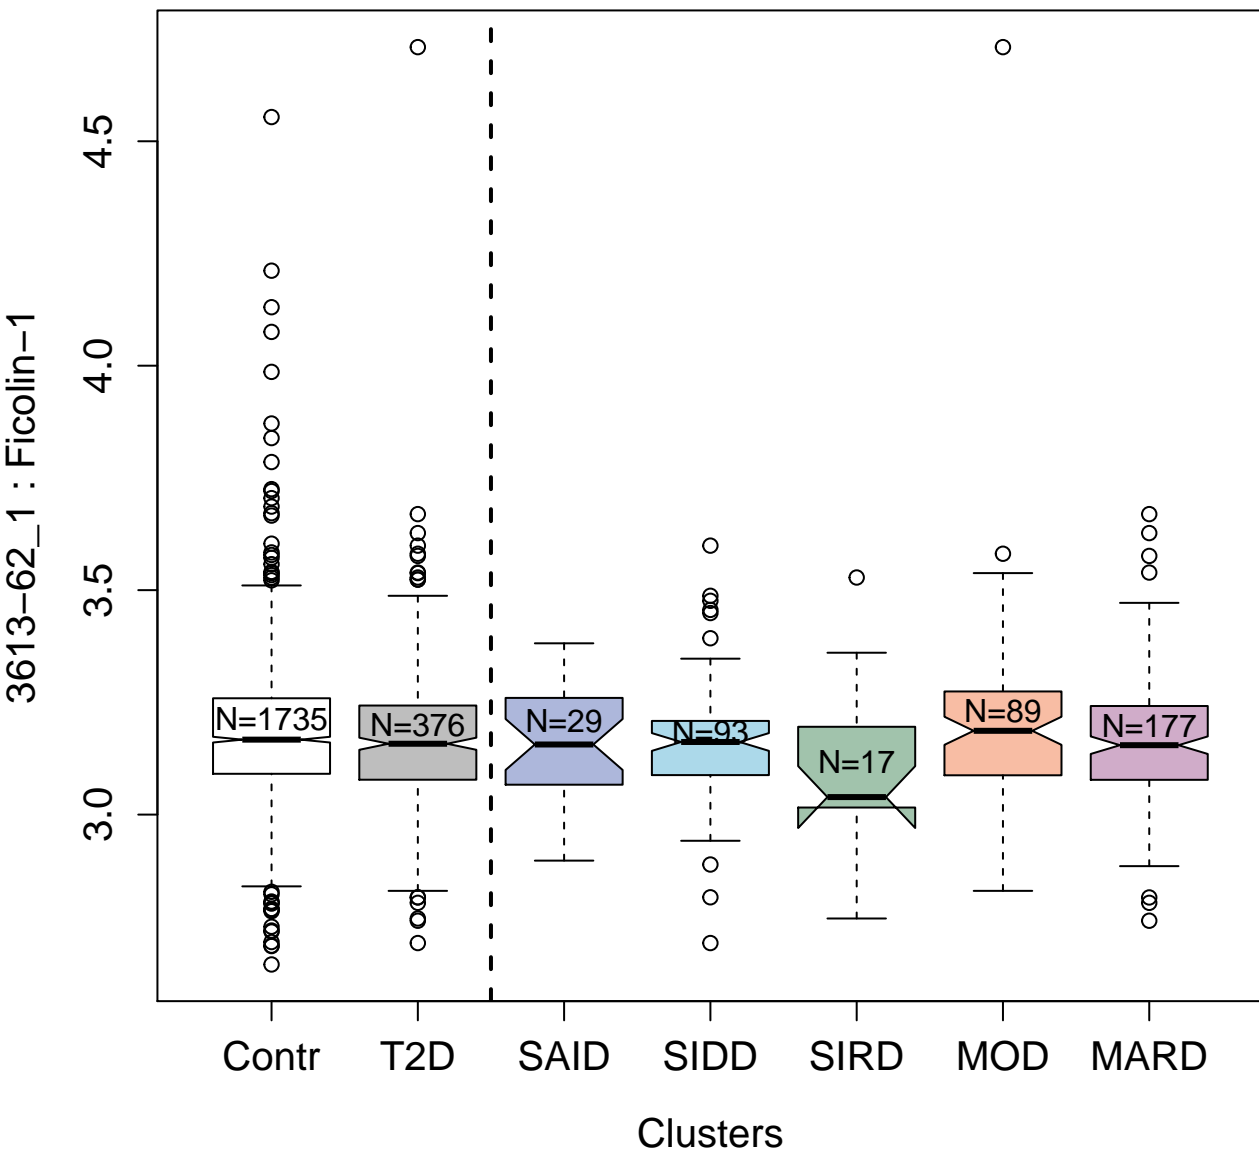

4481-34\_2 : Complement C4

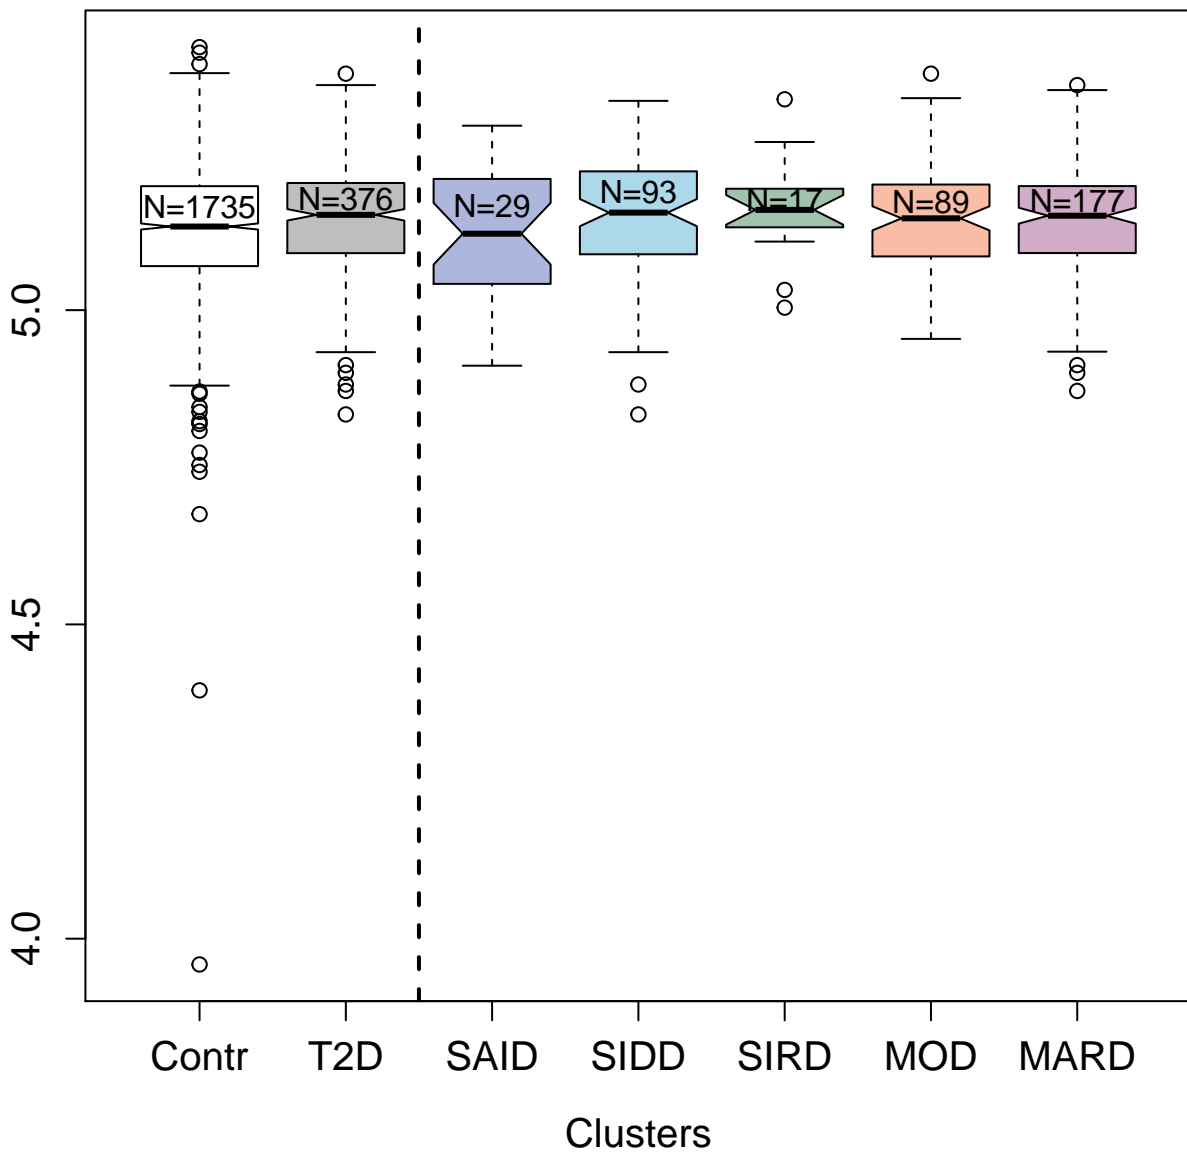

4890-10\_1 : Corticotropin

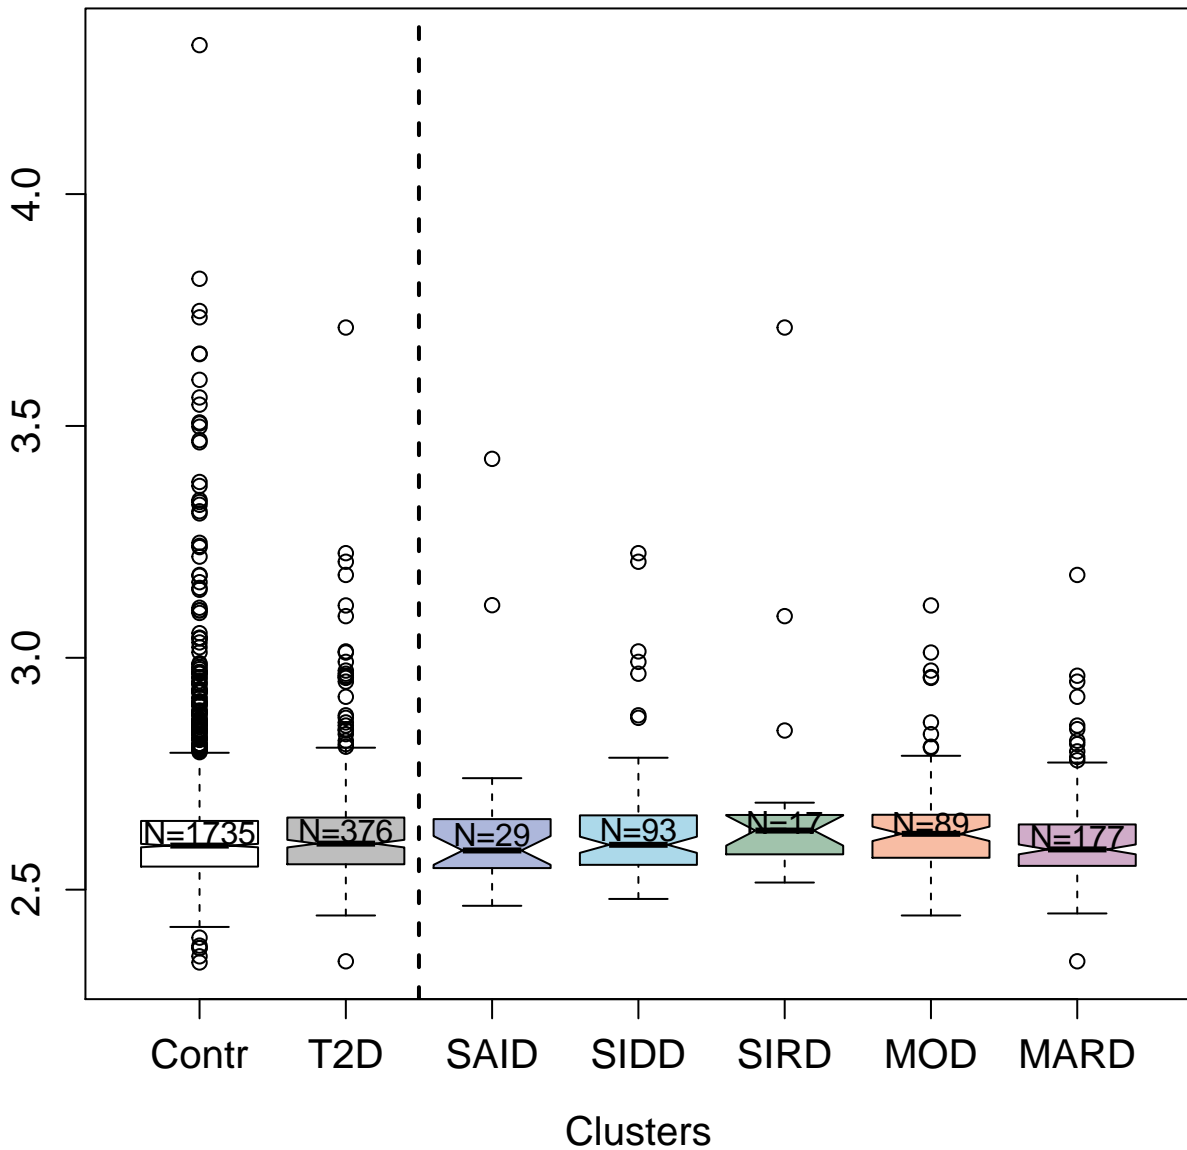

10367-62\_3 : Interleukin-12

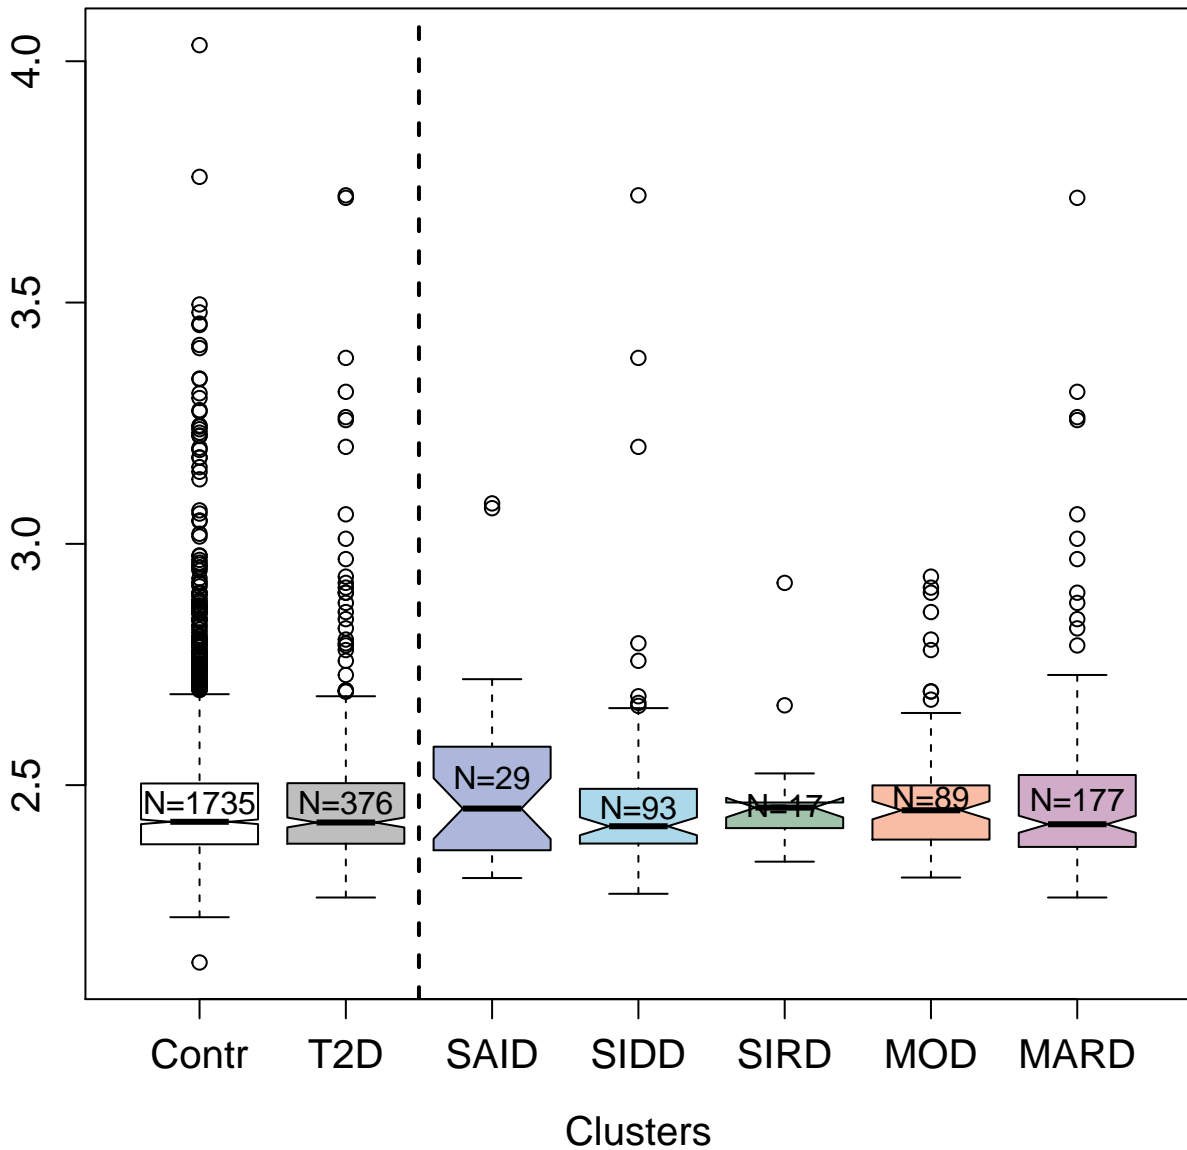

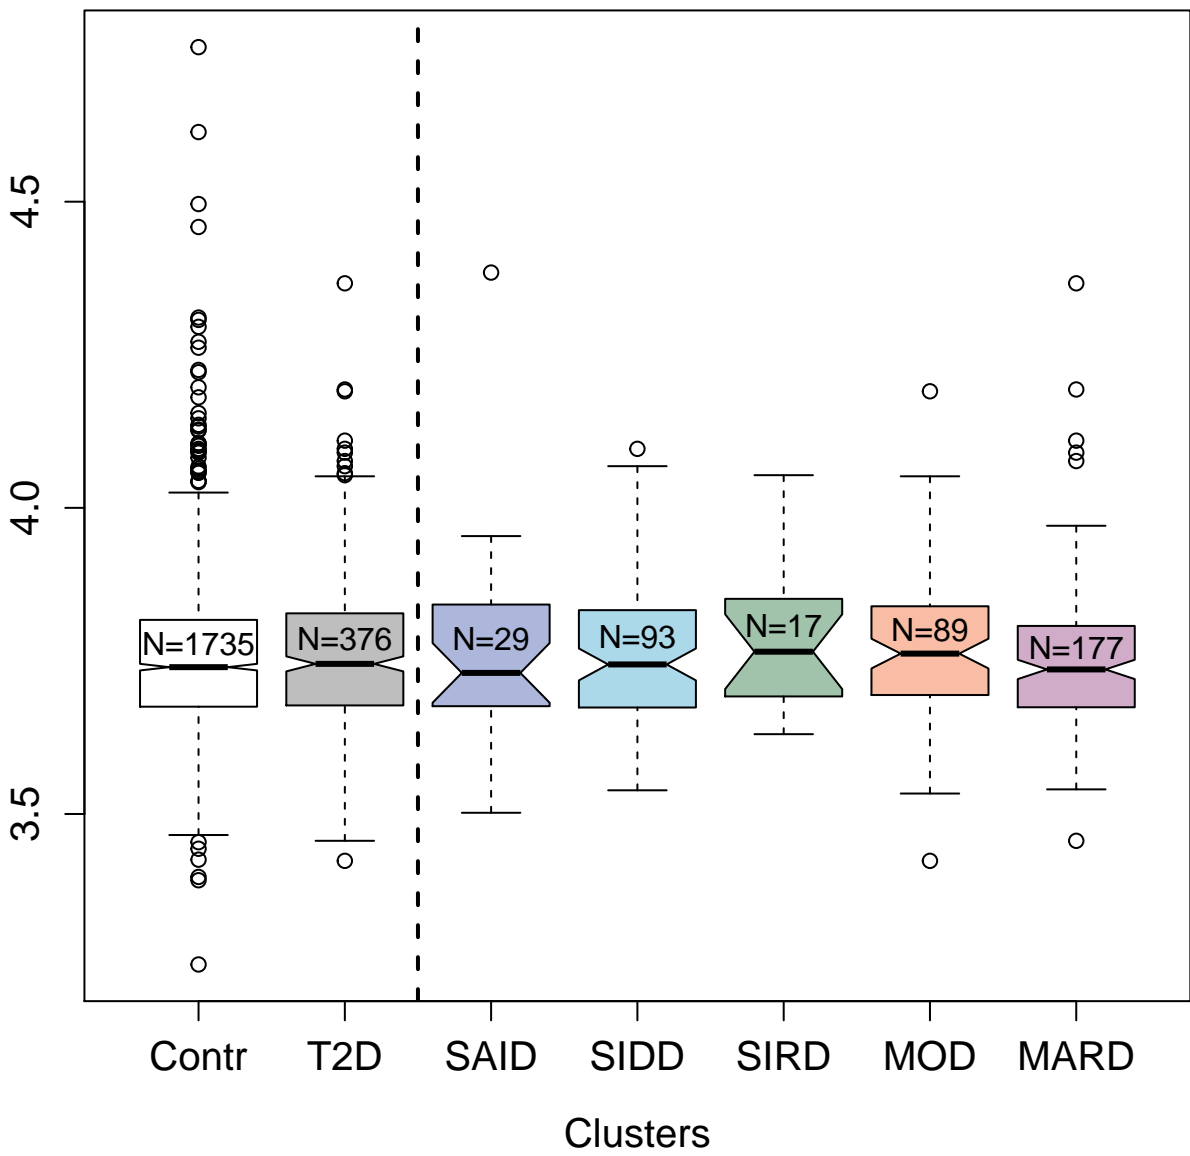

3710-49\_2 : Angiostatin

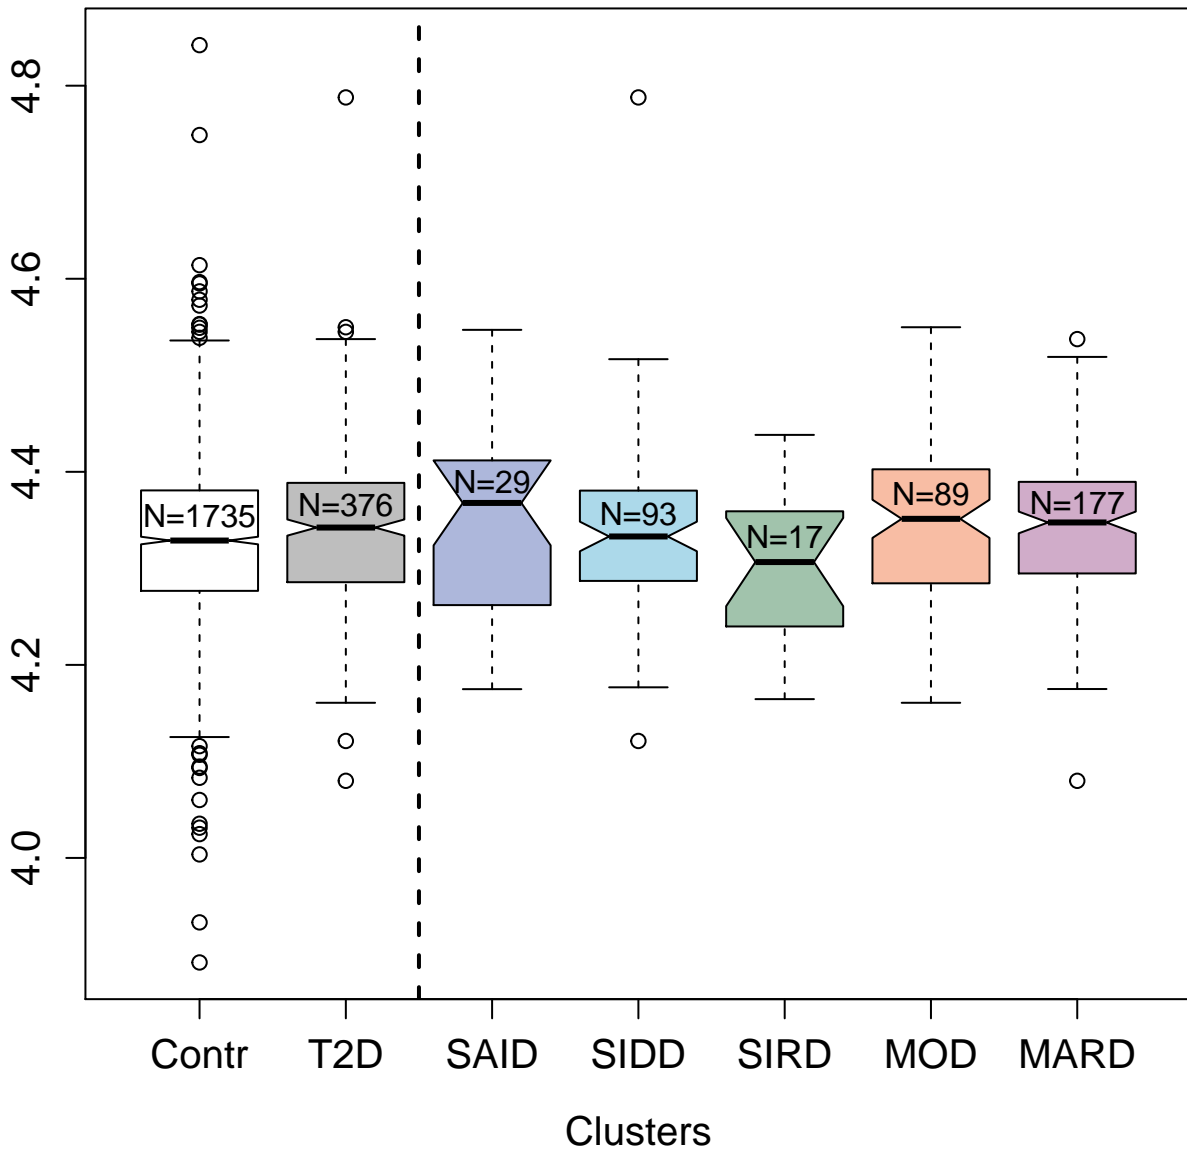

5005-4\_1 : Mitogen-activated protein kinase 12

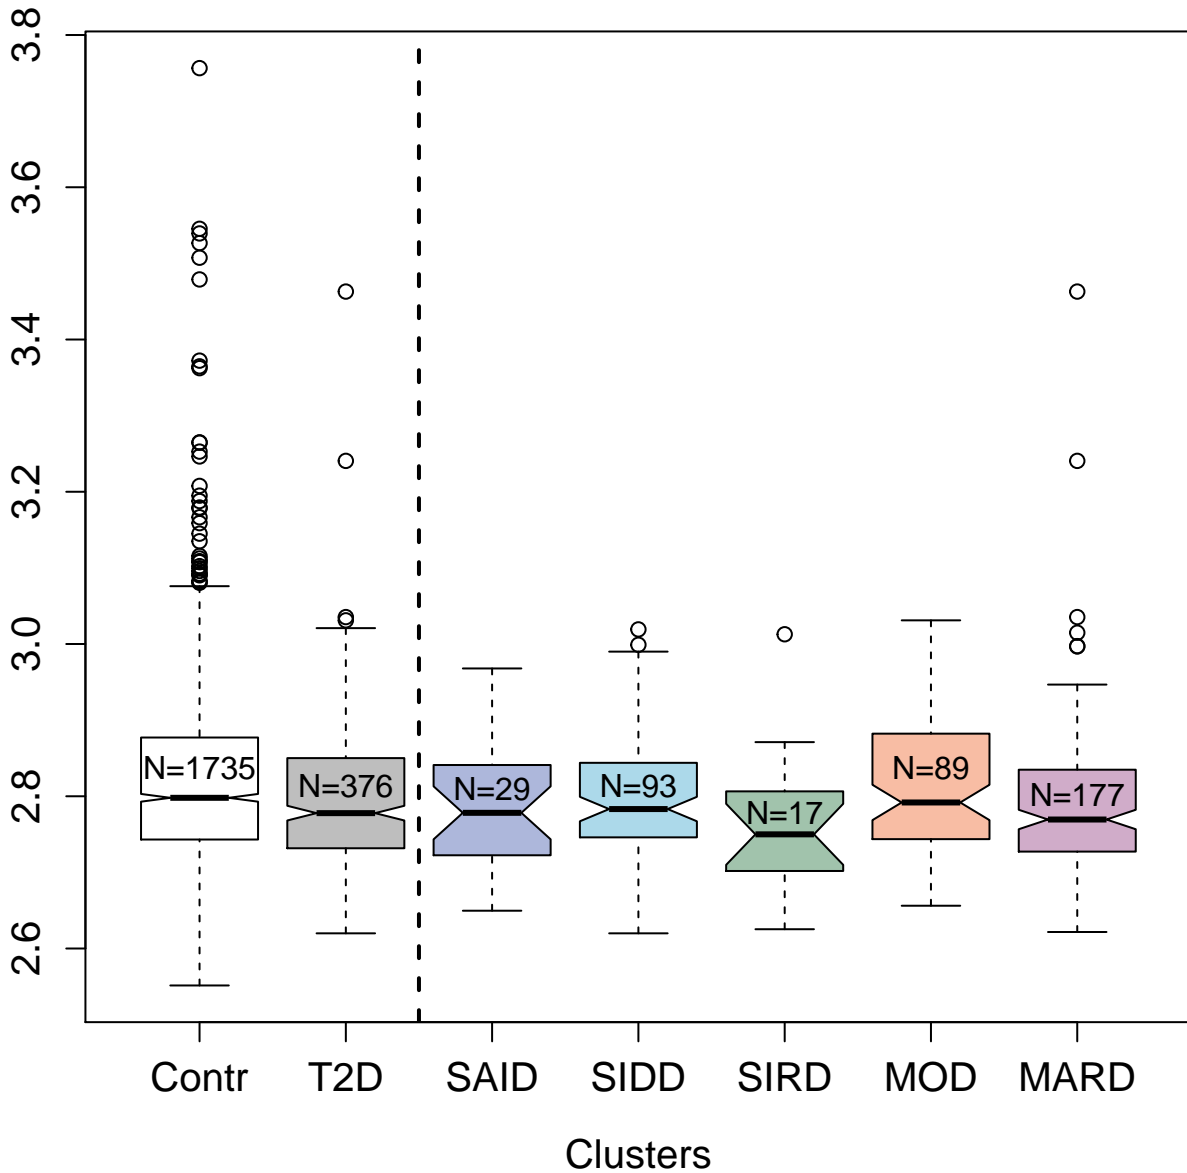



5424-55\_3 : Tumor necrosis factor receptor  
superfamily member 11A

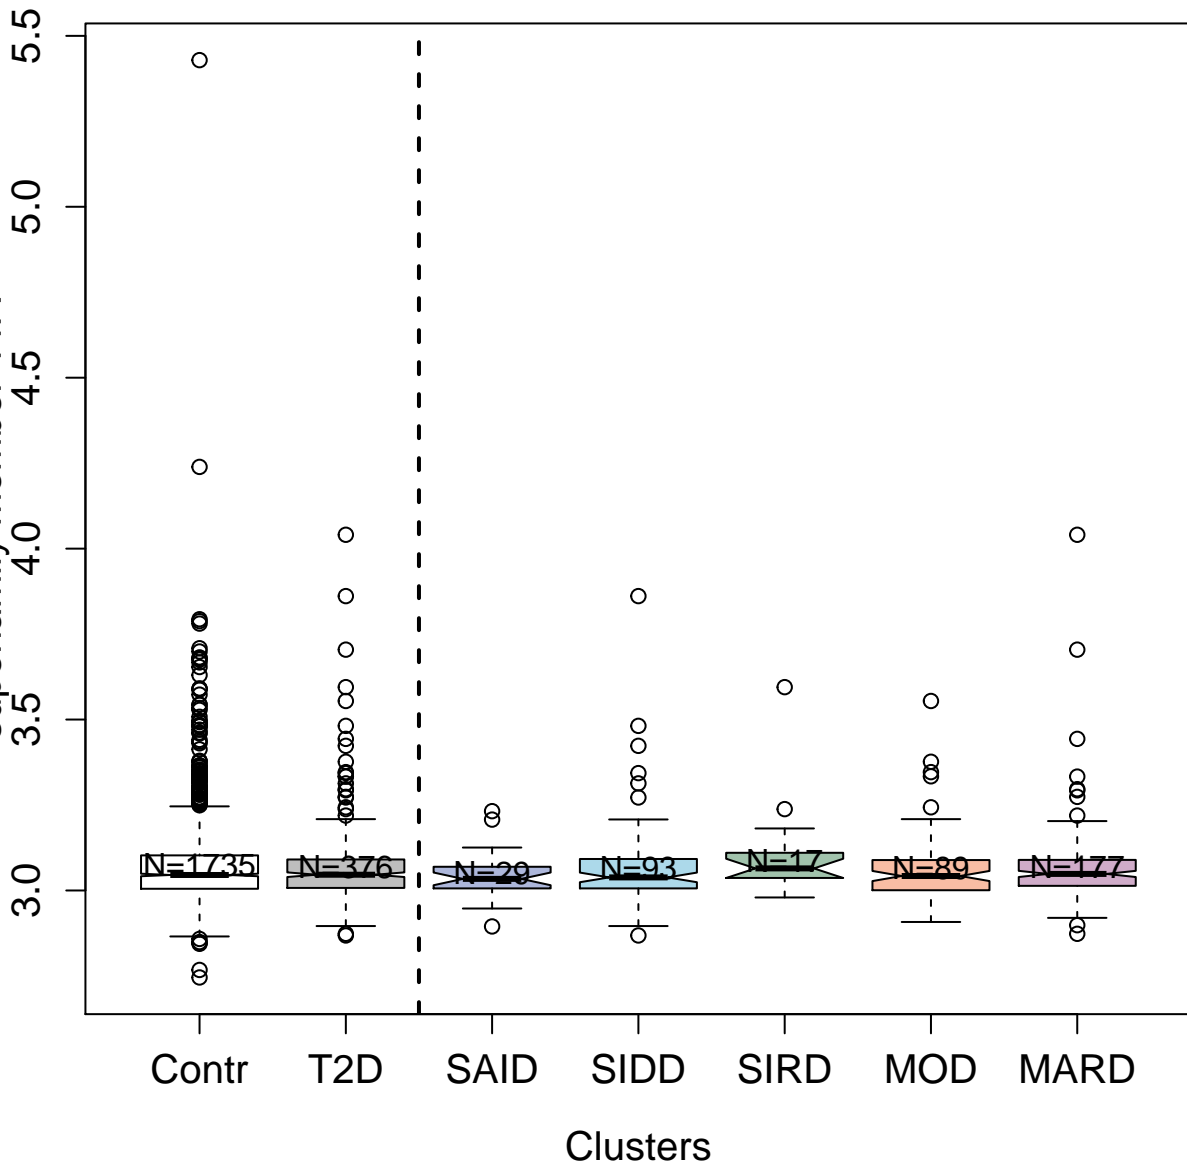

5082-51\_3 : X-linked interleukin-1 receptor  
accessory protein-like 2

3.0 3.5 4.0 4.5

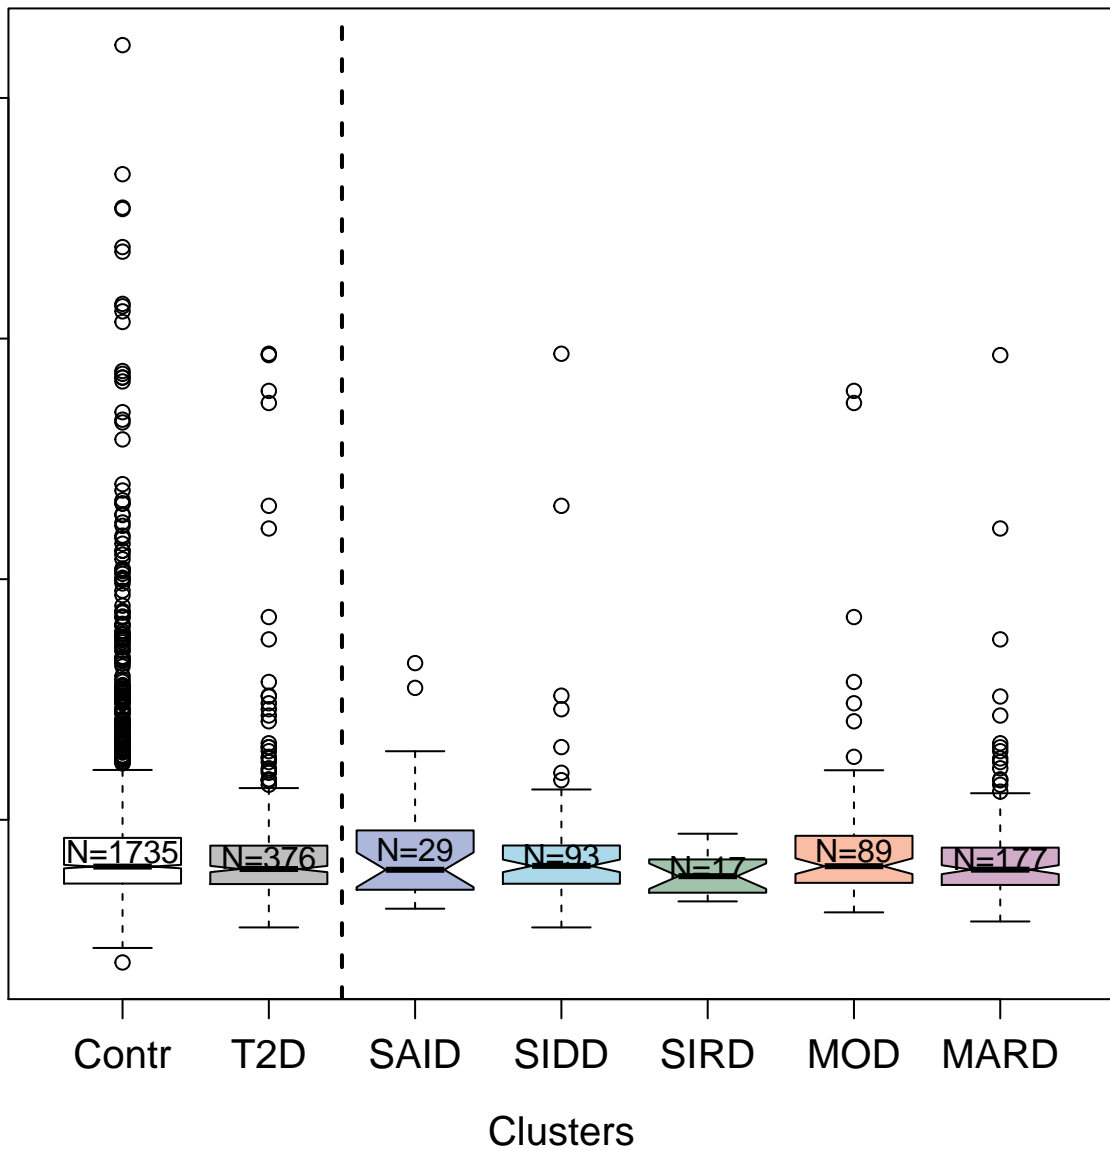

4394-71\_2 : Fibroblast growth factor 8 isoform A

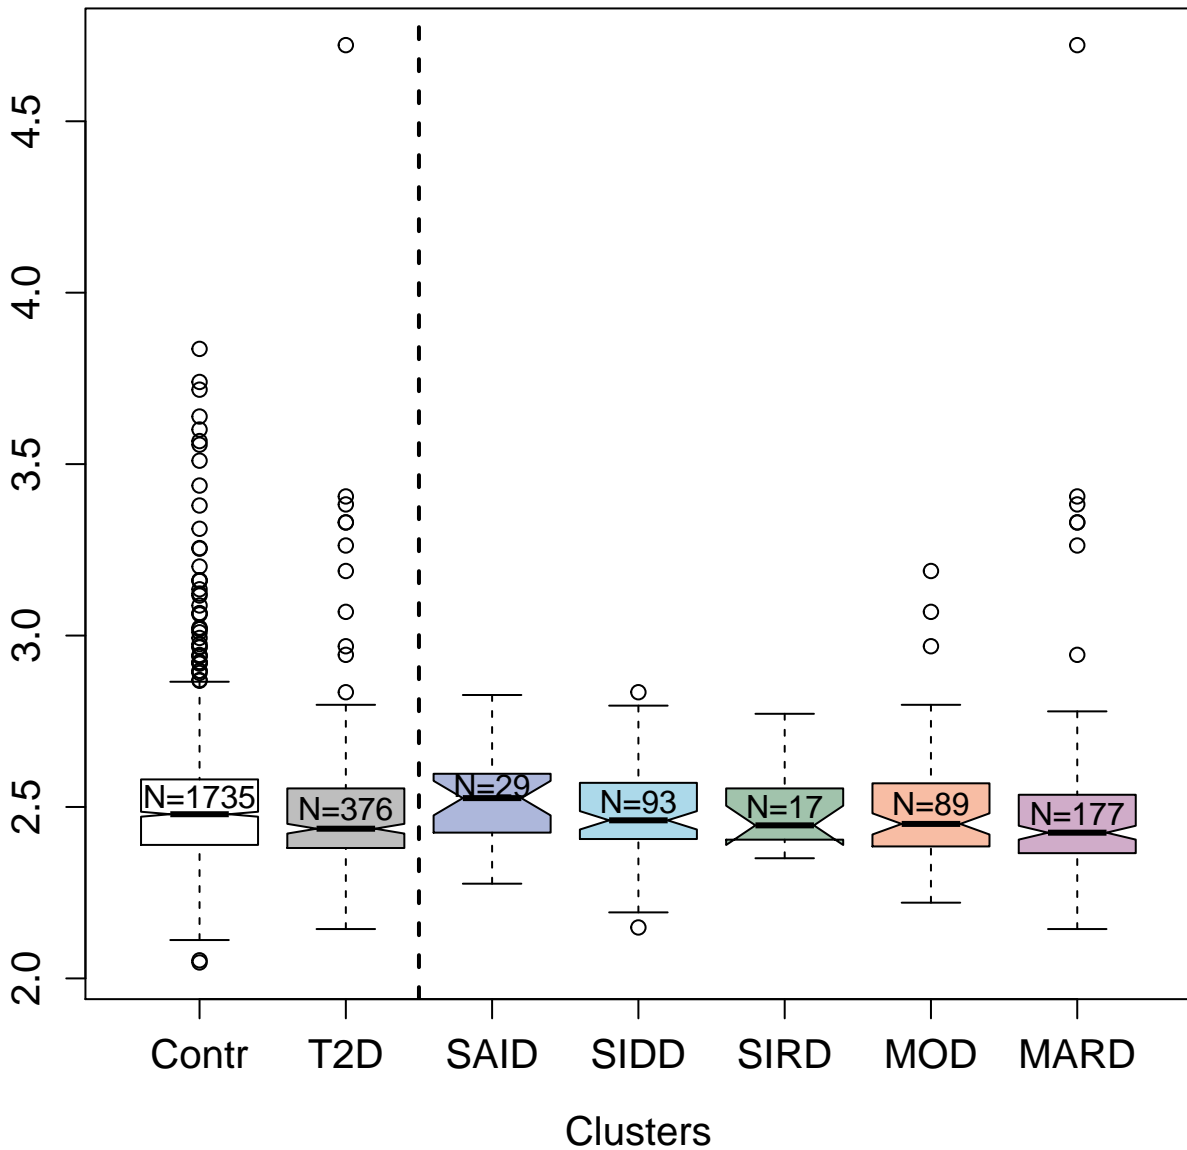

3033-57\_1 : Galectin-2

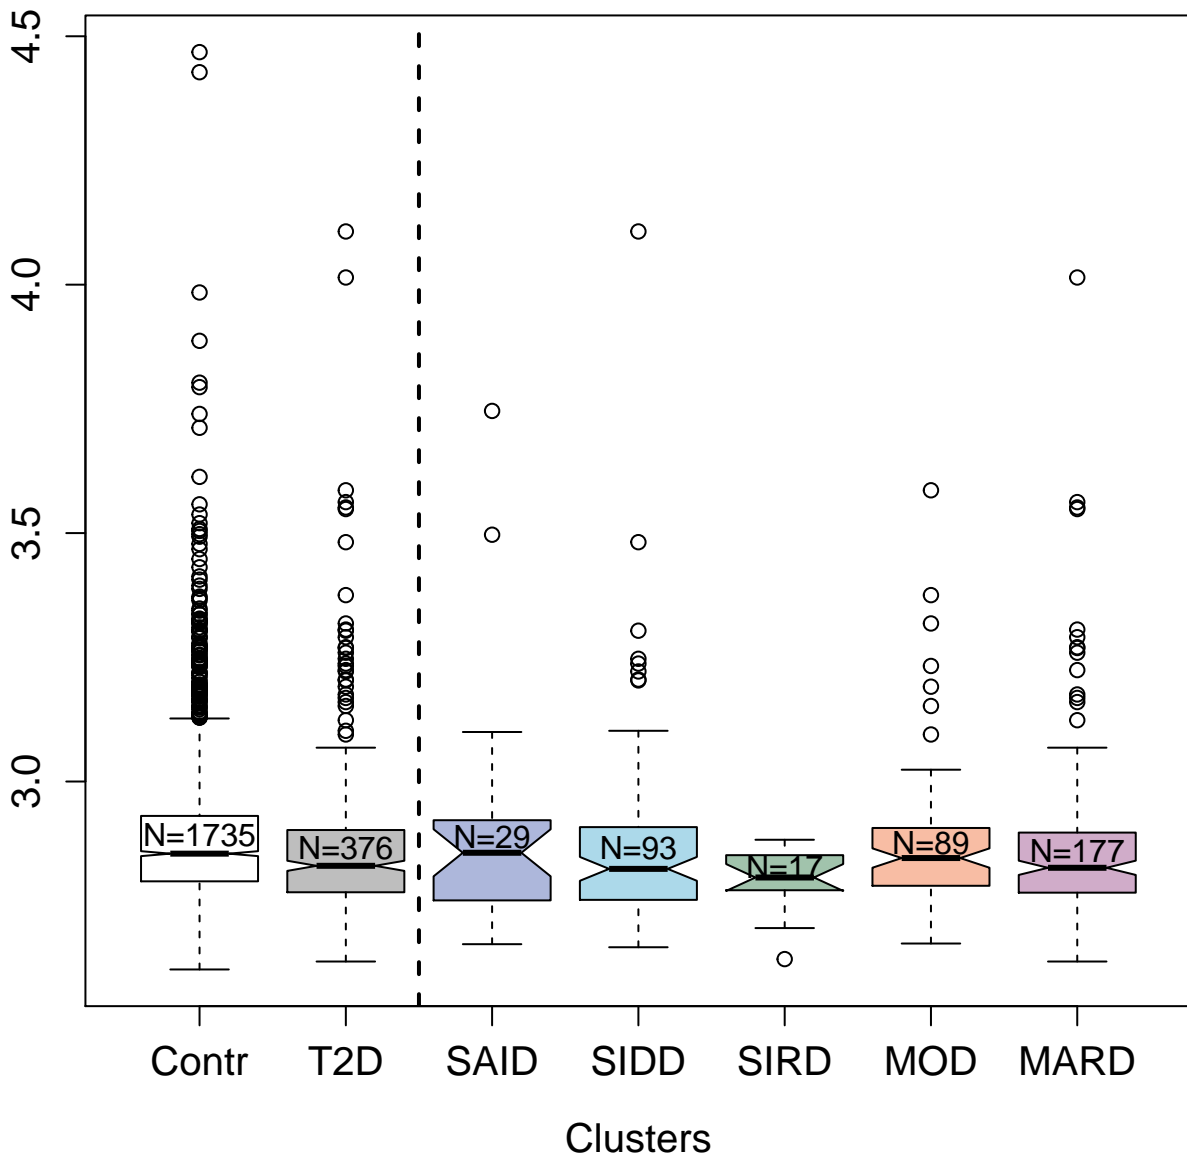

5854-60\_3 : Microtubule-associated protein tau

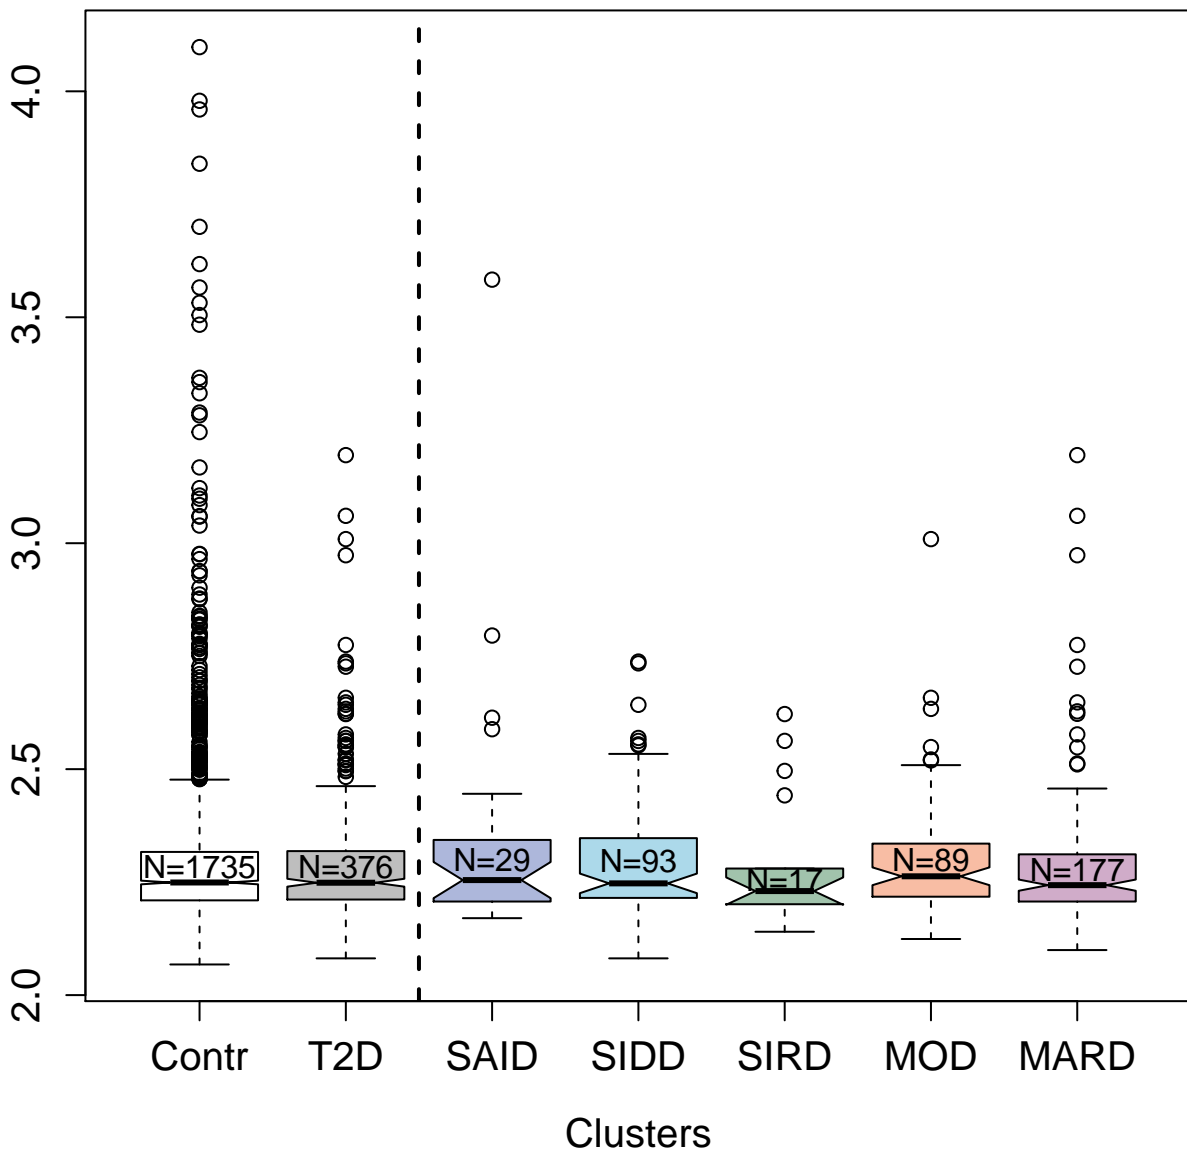

3723-1\_2 : Brain natriuretic peptide 32

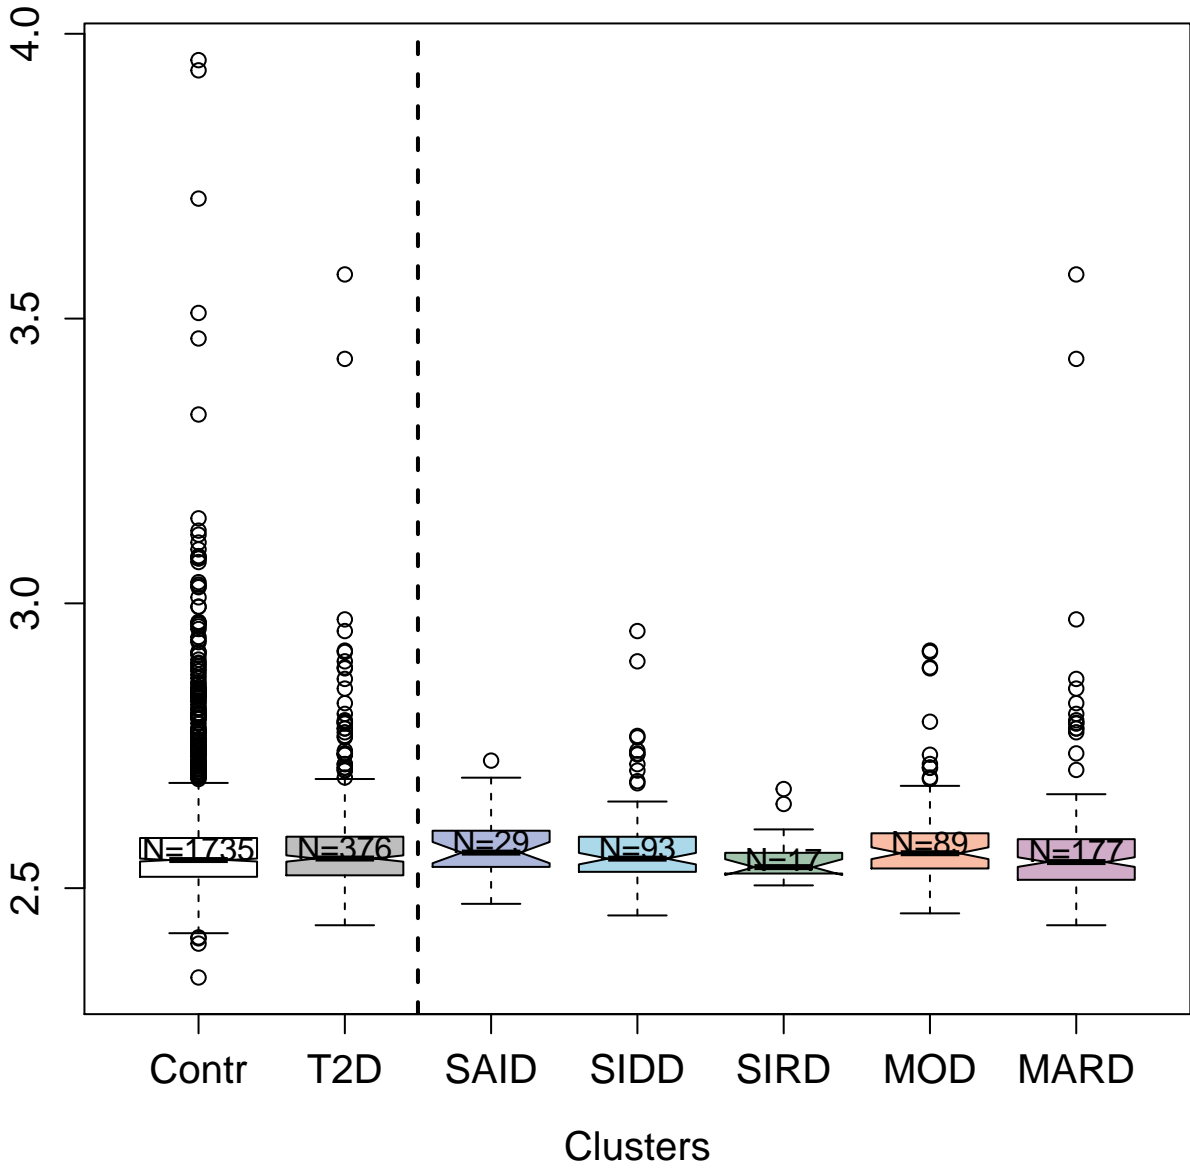

2618-10\_2 : Receptor tyrosine-protein kinase  
erfB-4

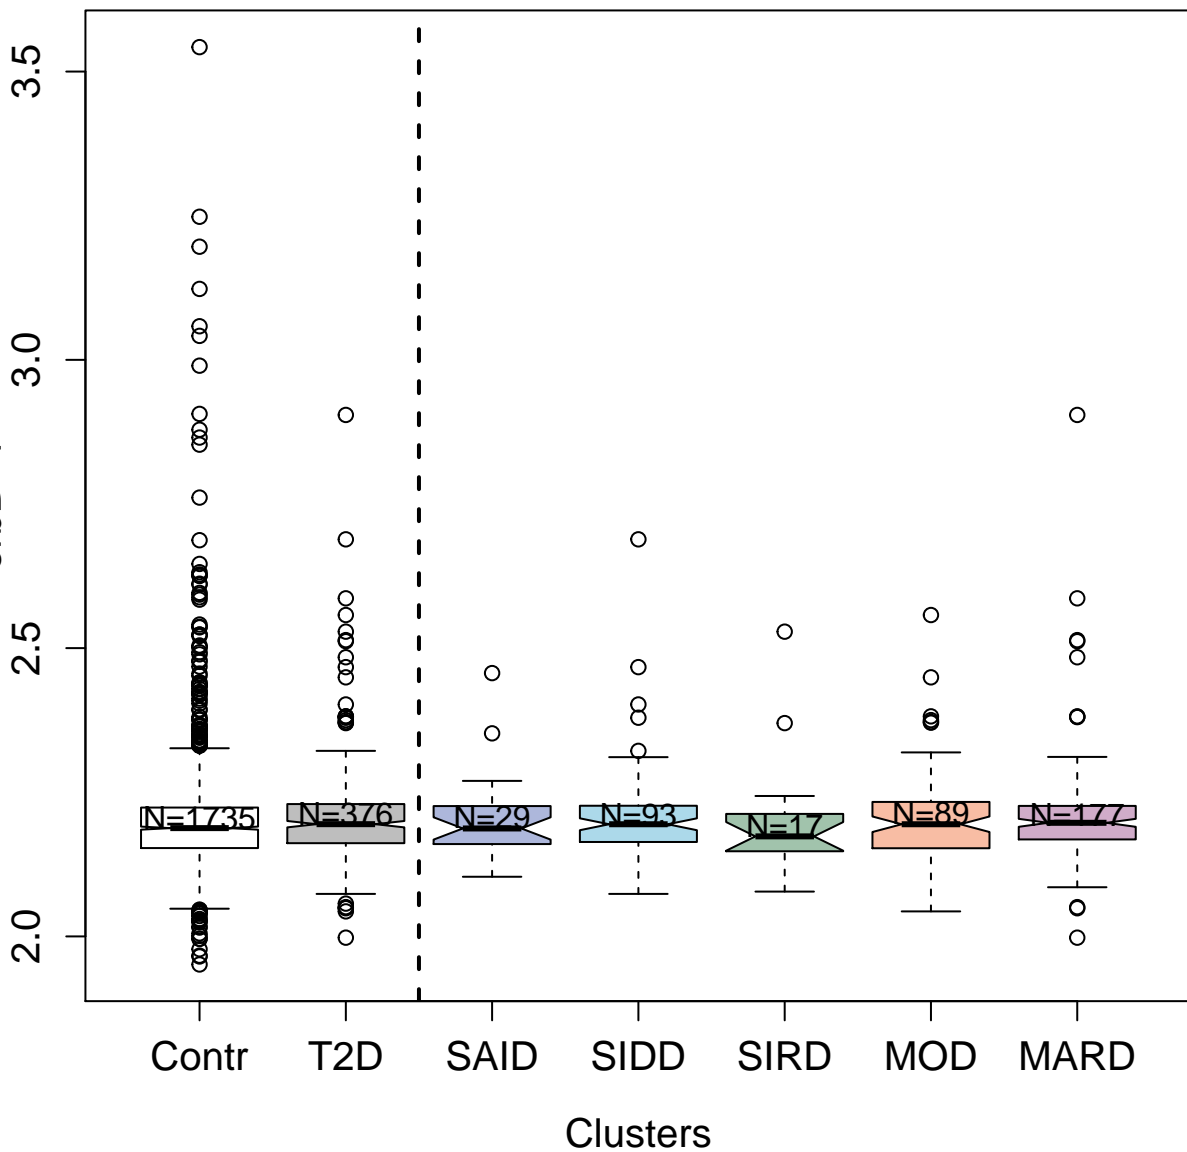

3835-11\_2 : Toll-like receptor 2

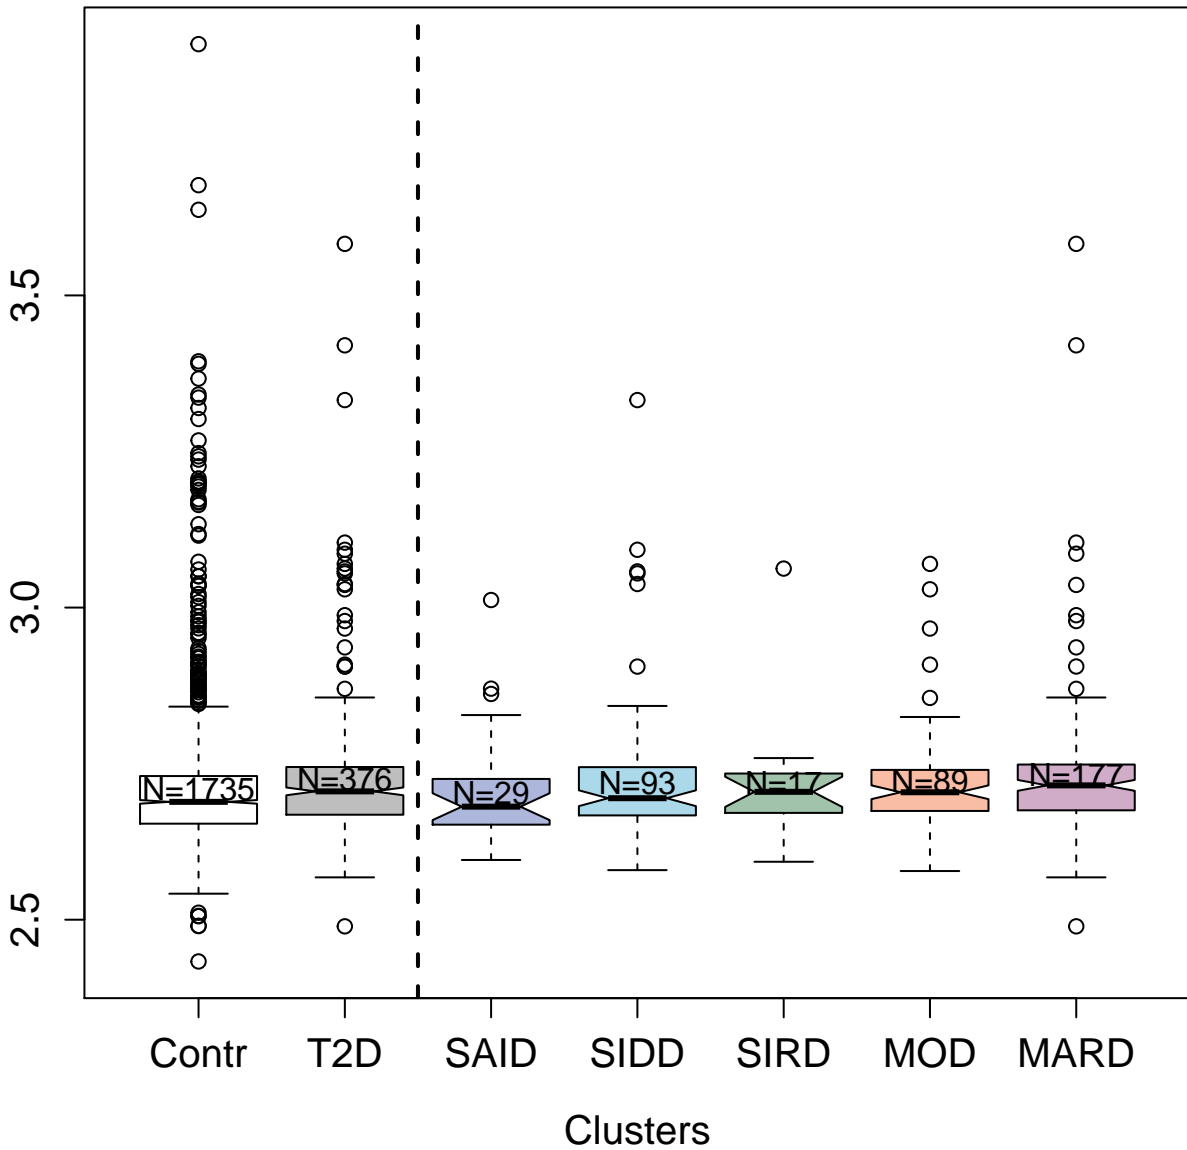



14120-2\_3 : E3 ubiquitin-protein ligase RNF43

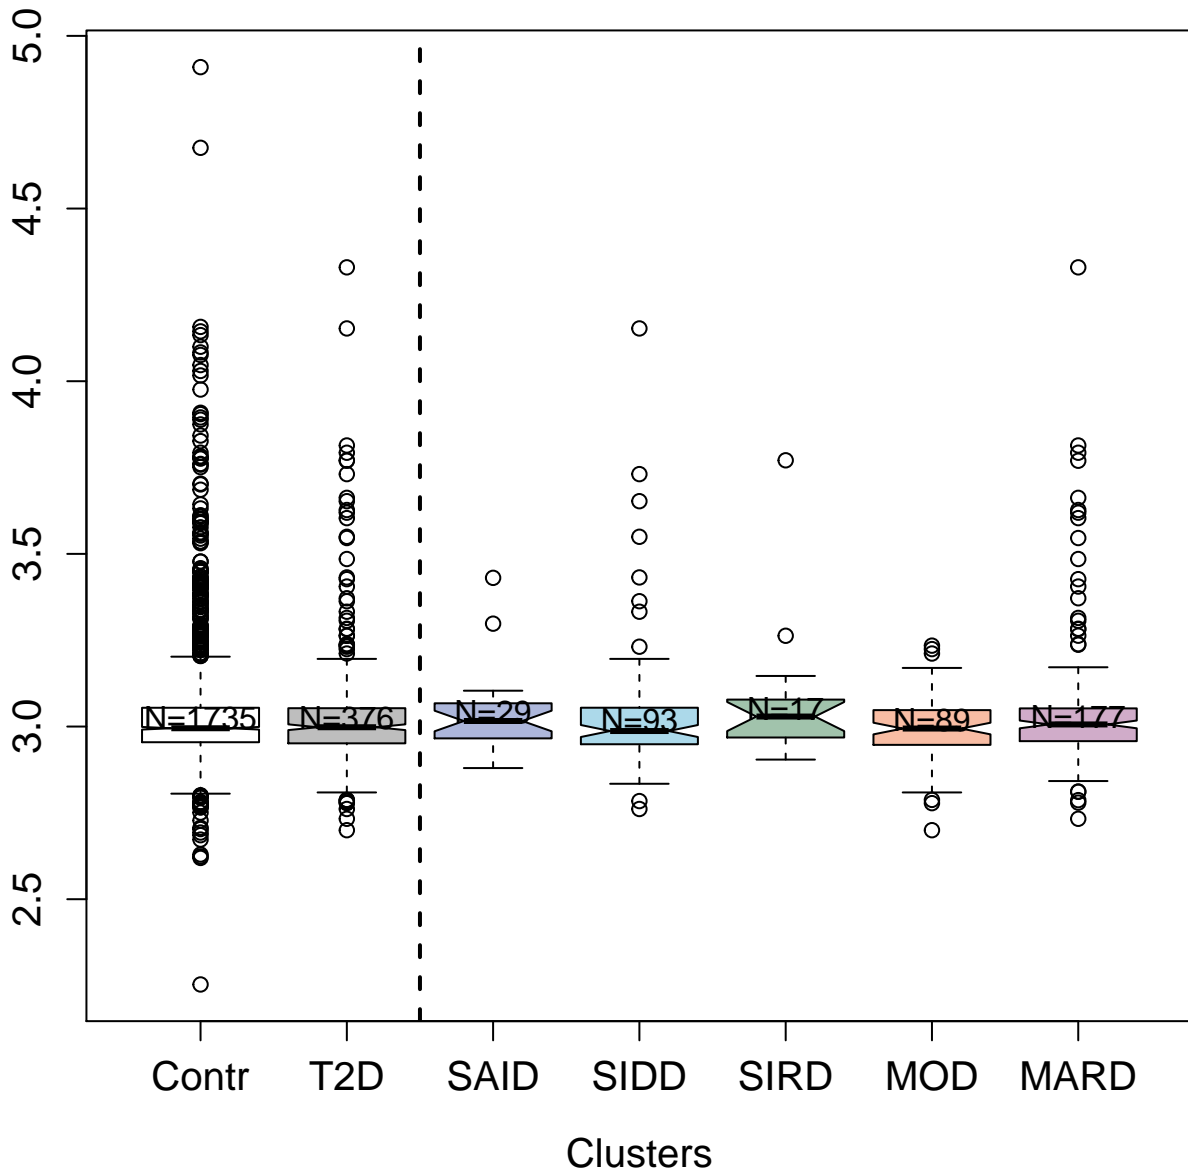

4392-54\_2 : Fibroblast growth factor 12

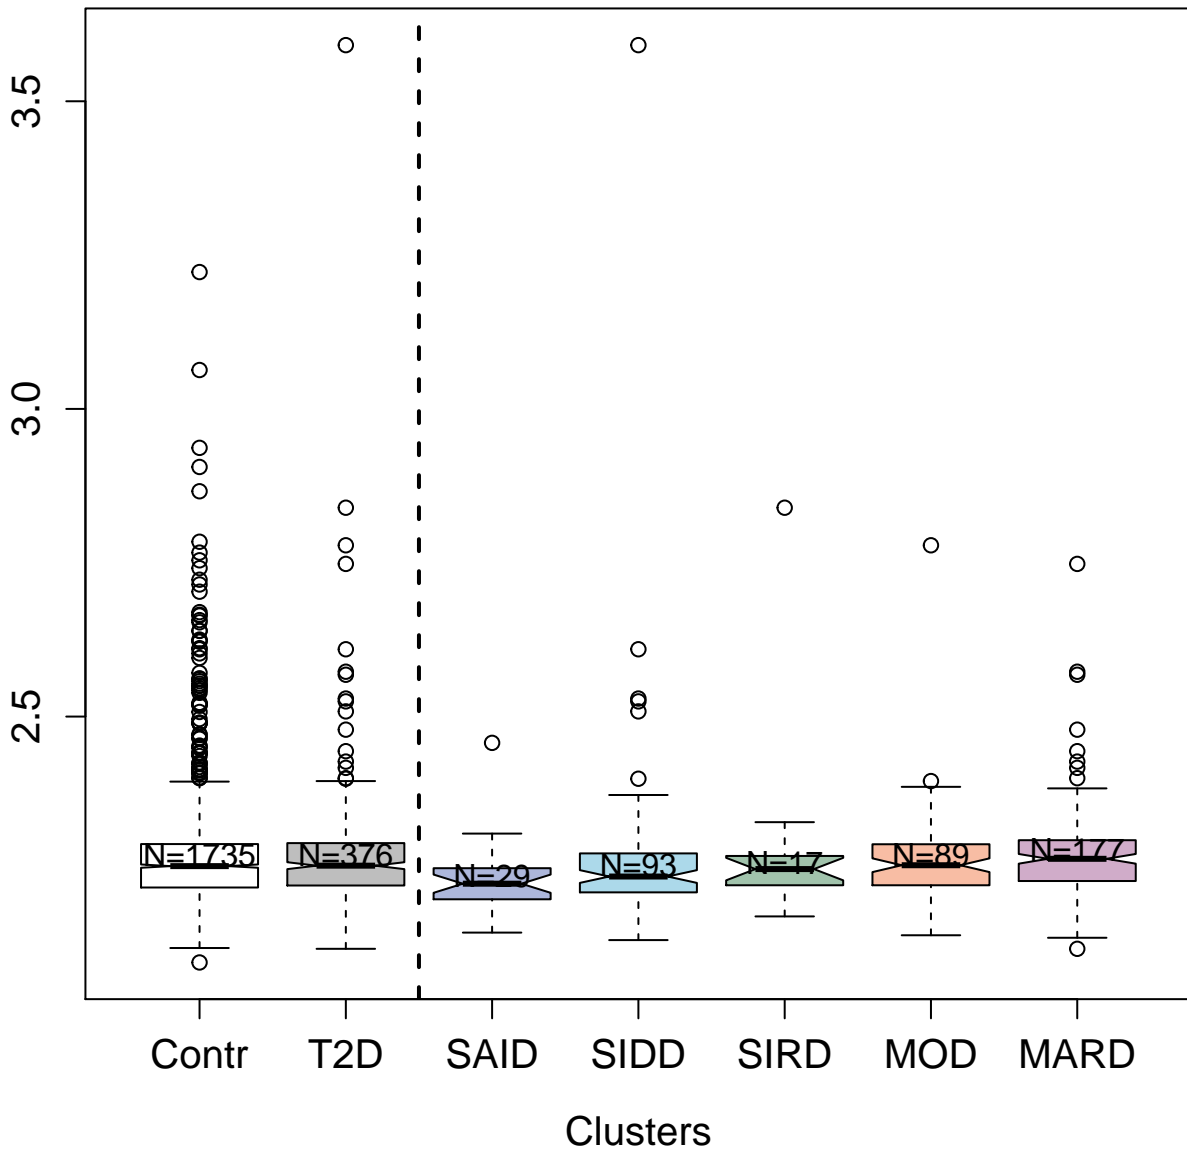

5807-77\_3 : CD70 antigen

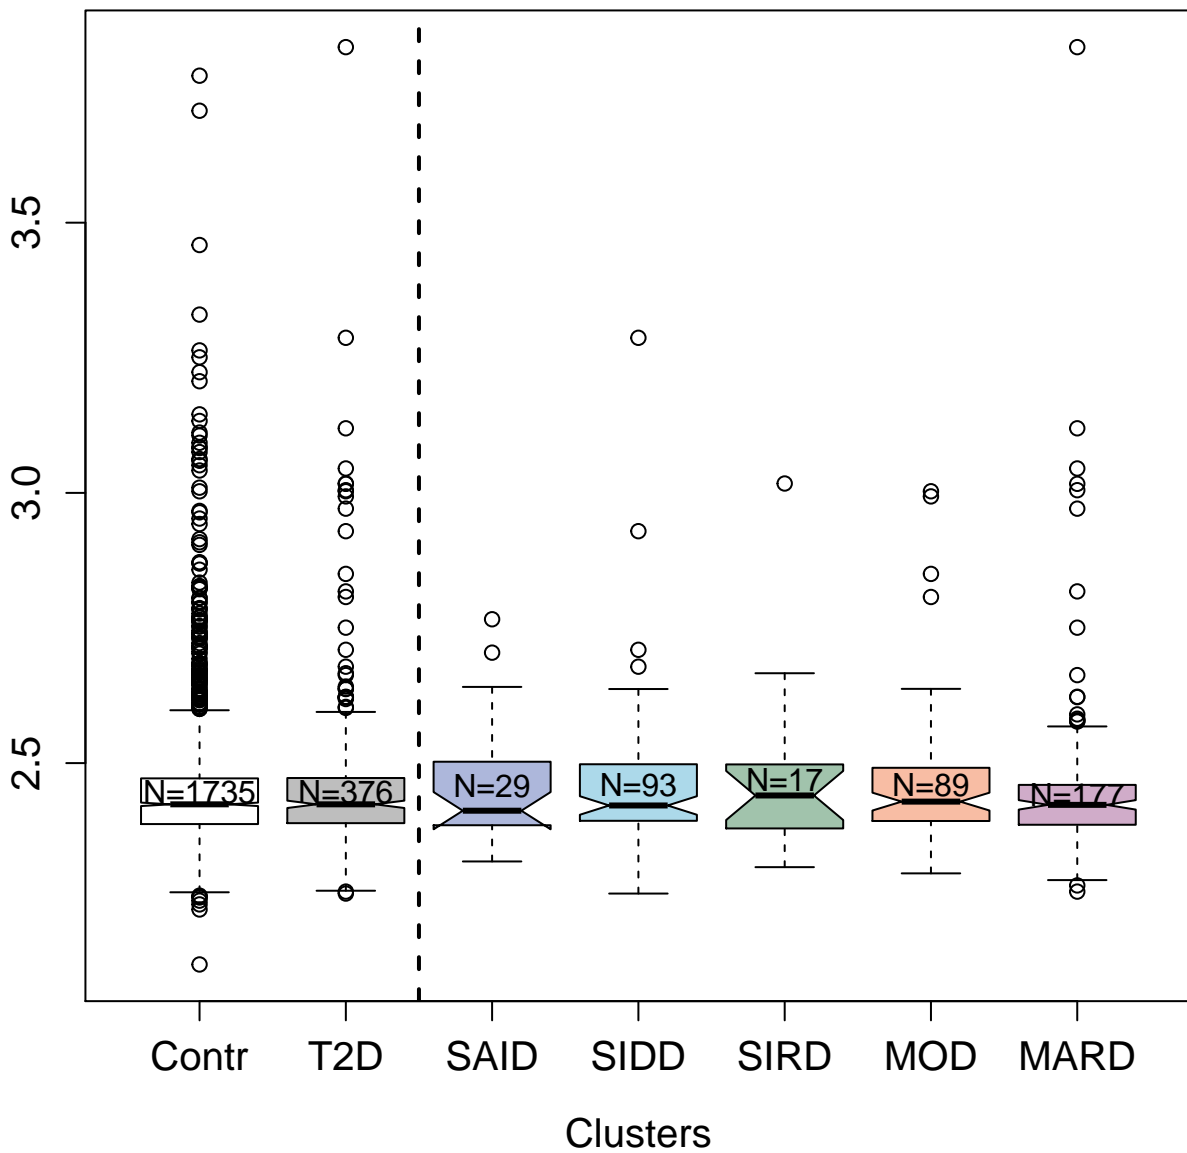

5451-1\_3 : CD166 antigen

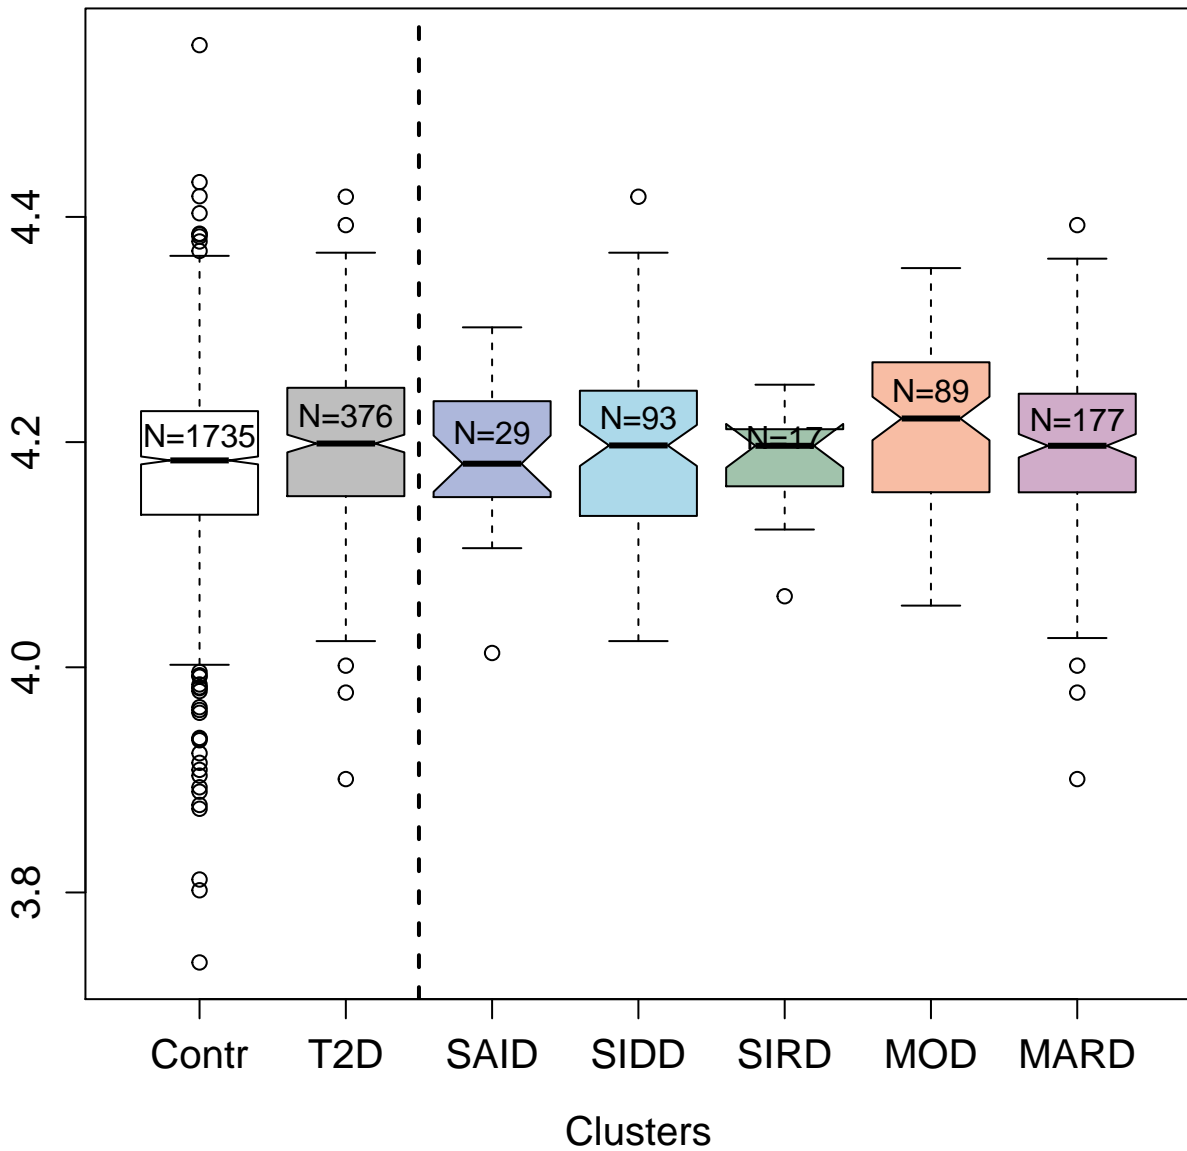

5085-18\_3 : Interleukin-20 receptor subunit alpha

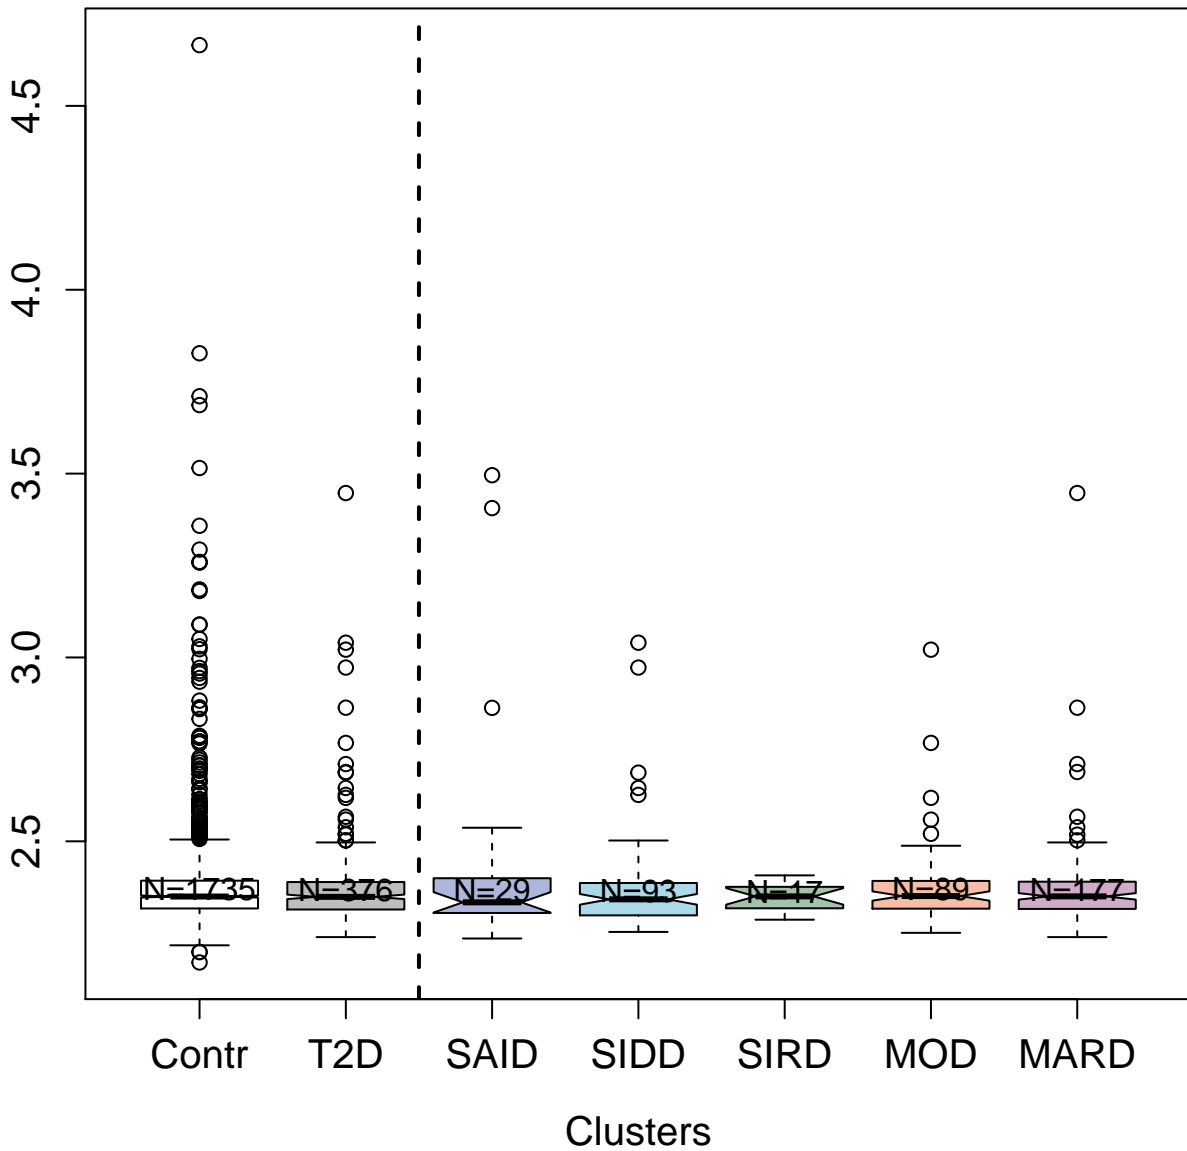

11510-31\_3 : Apolipoprotein L1

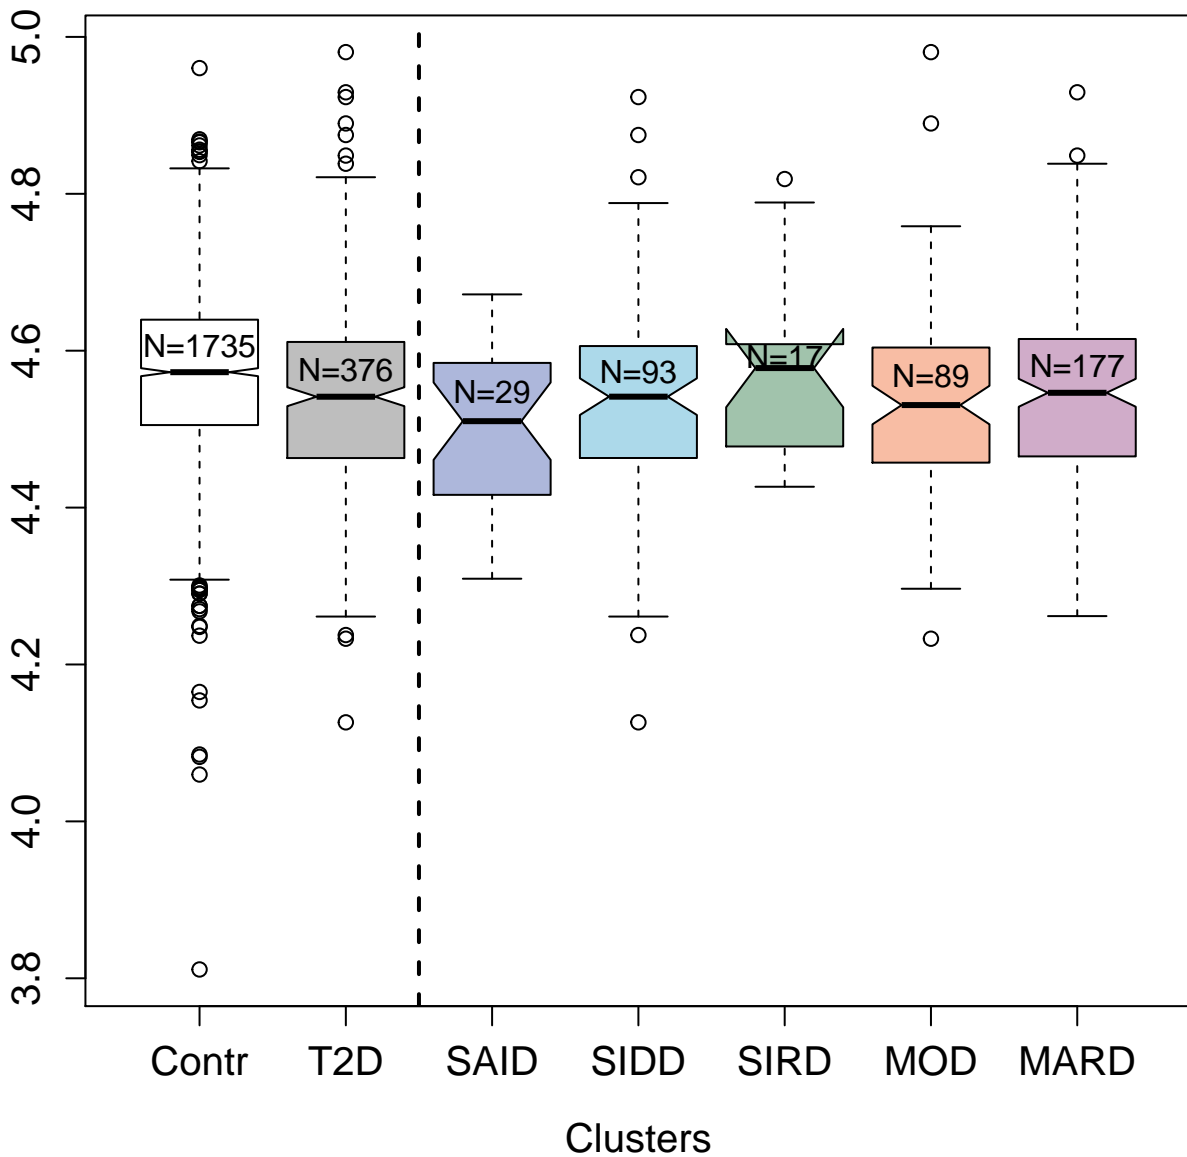

5410-53\_3 : Cadherin-15

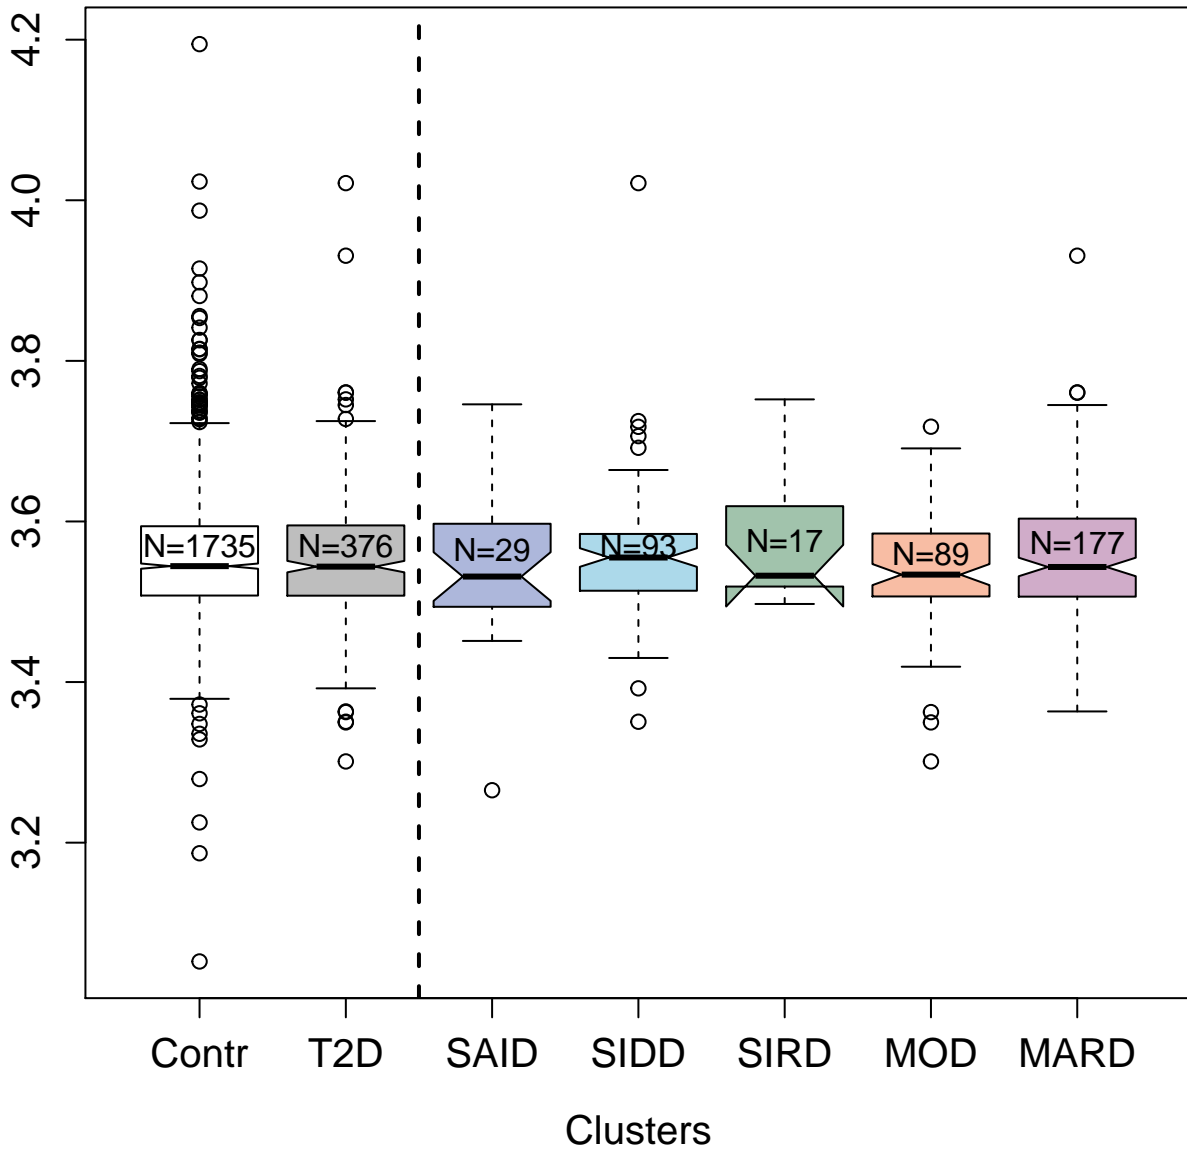

4493-92\_1 : Interleukin-11

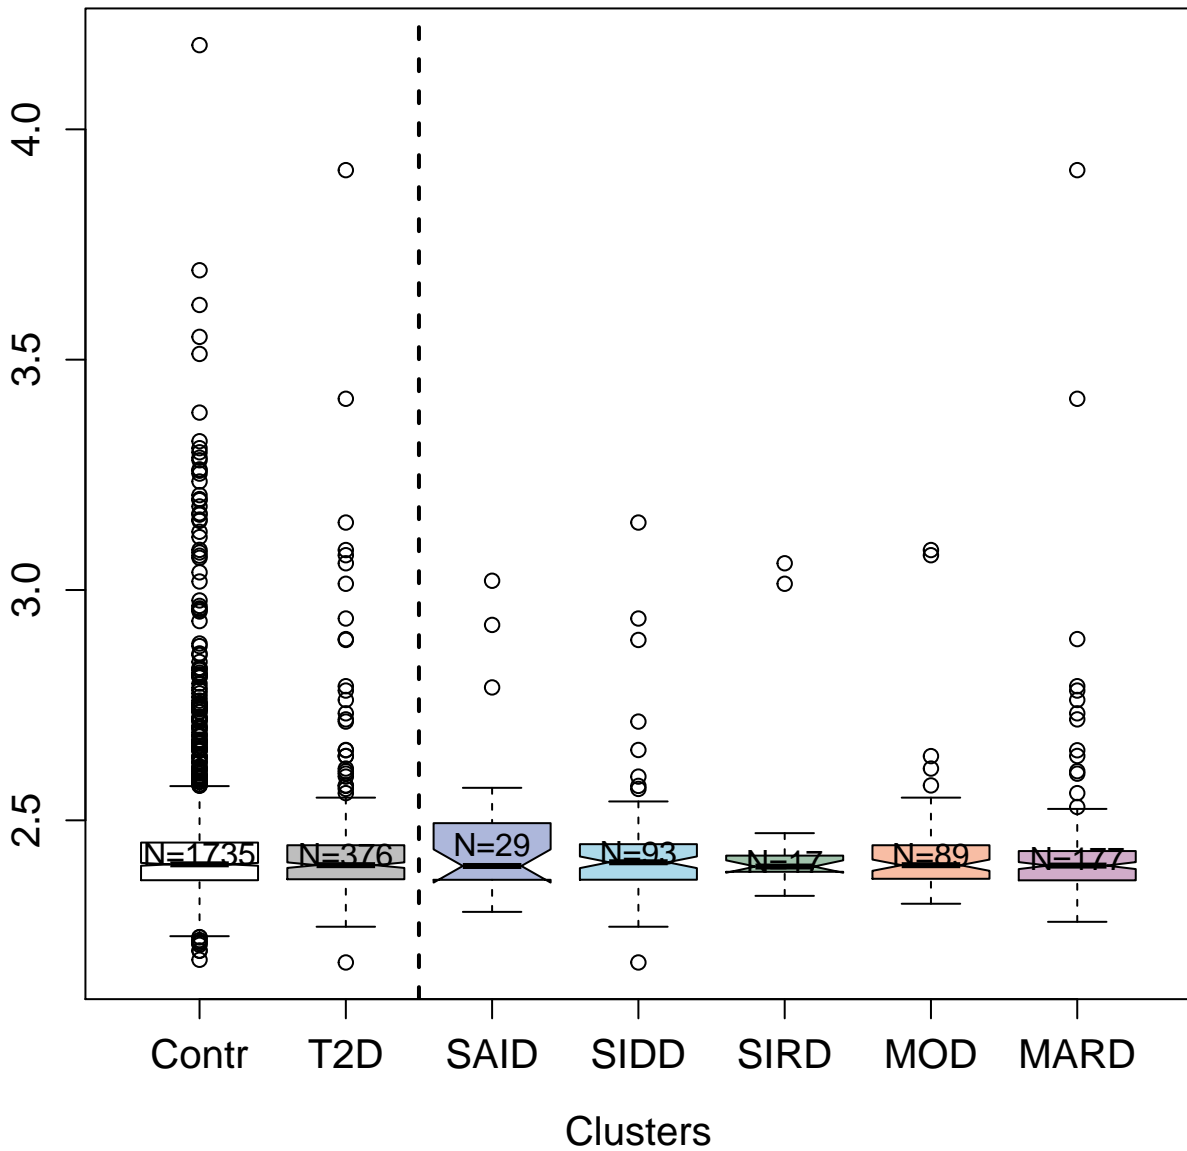



3761-4\_2 : Prostaglandin G/H synthase 2

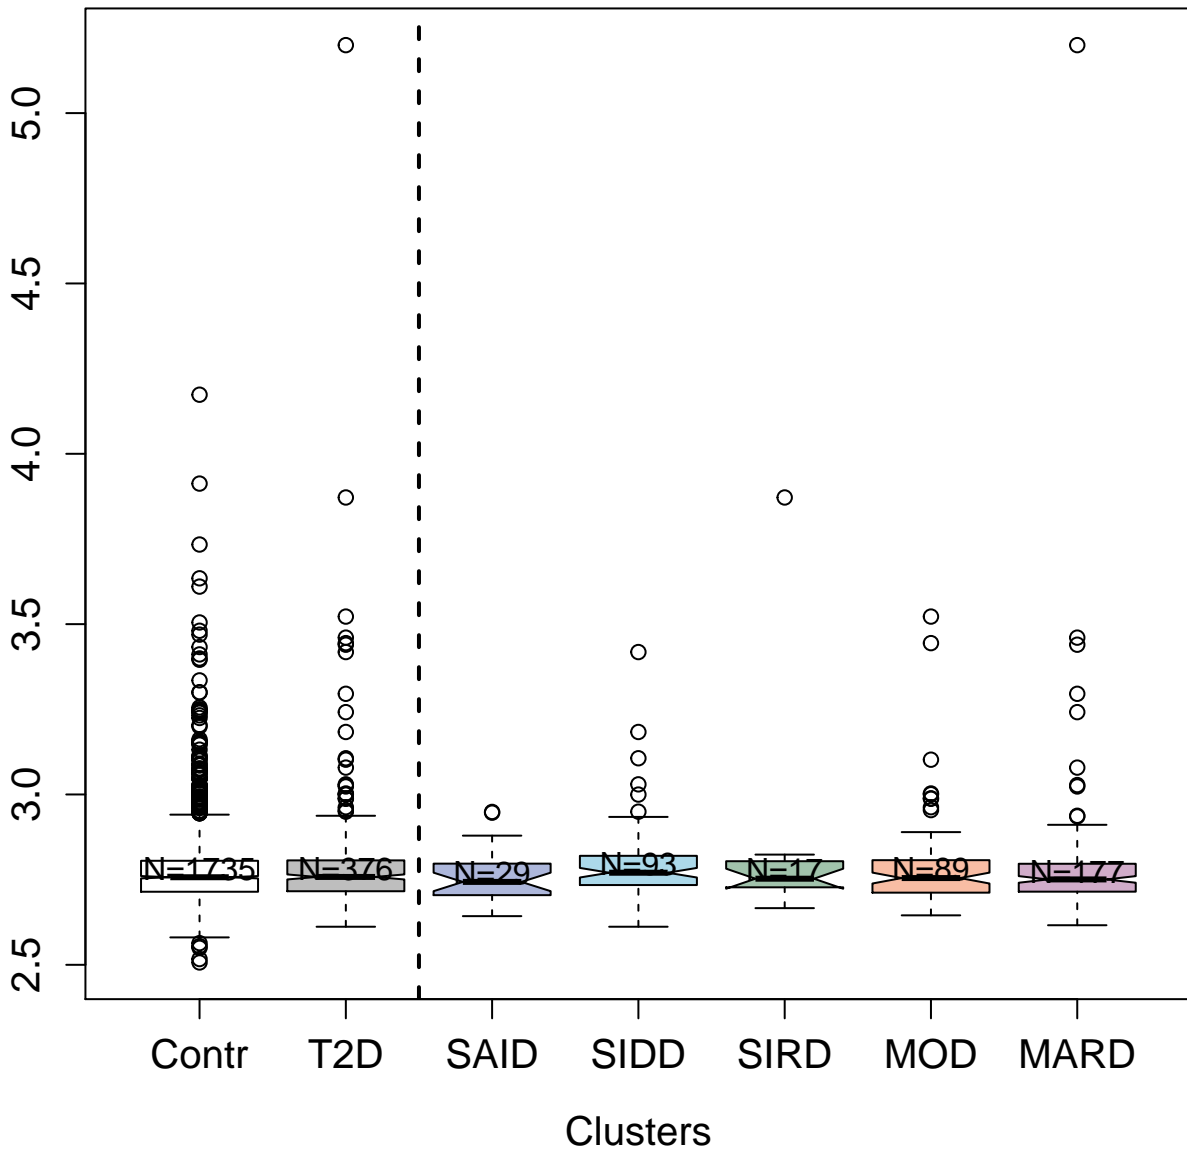

5542-22\_2 : Neuropilin-1

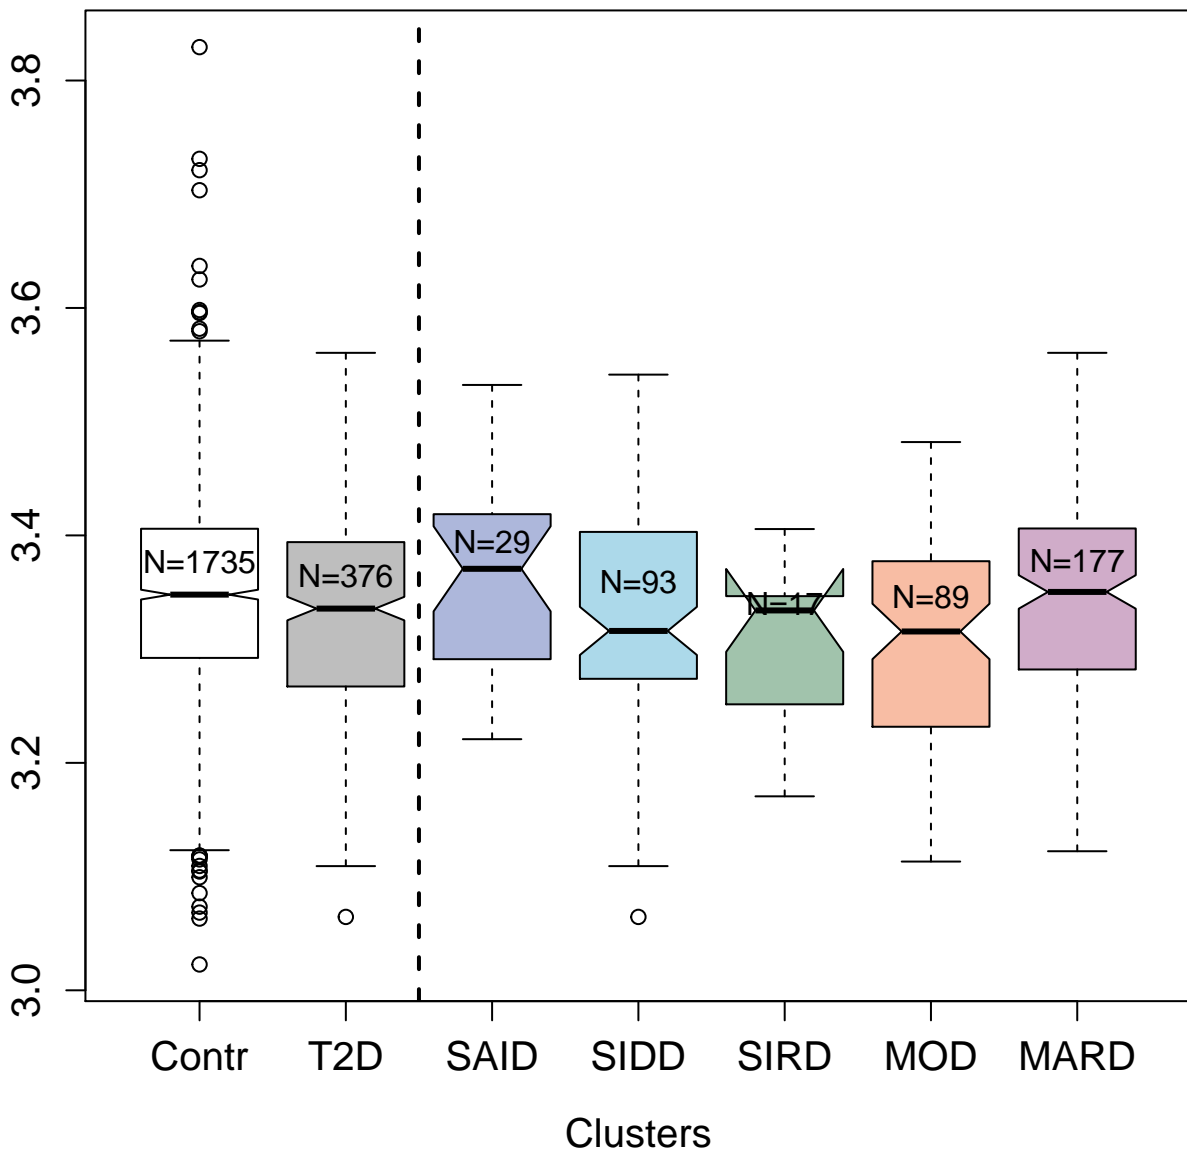

4245-80\_2 : E3 ubiquitin-protein ligase Mdm2

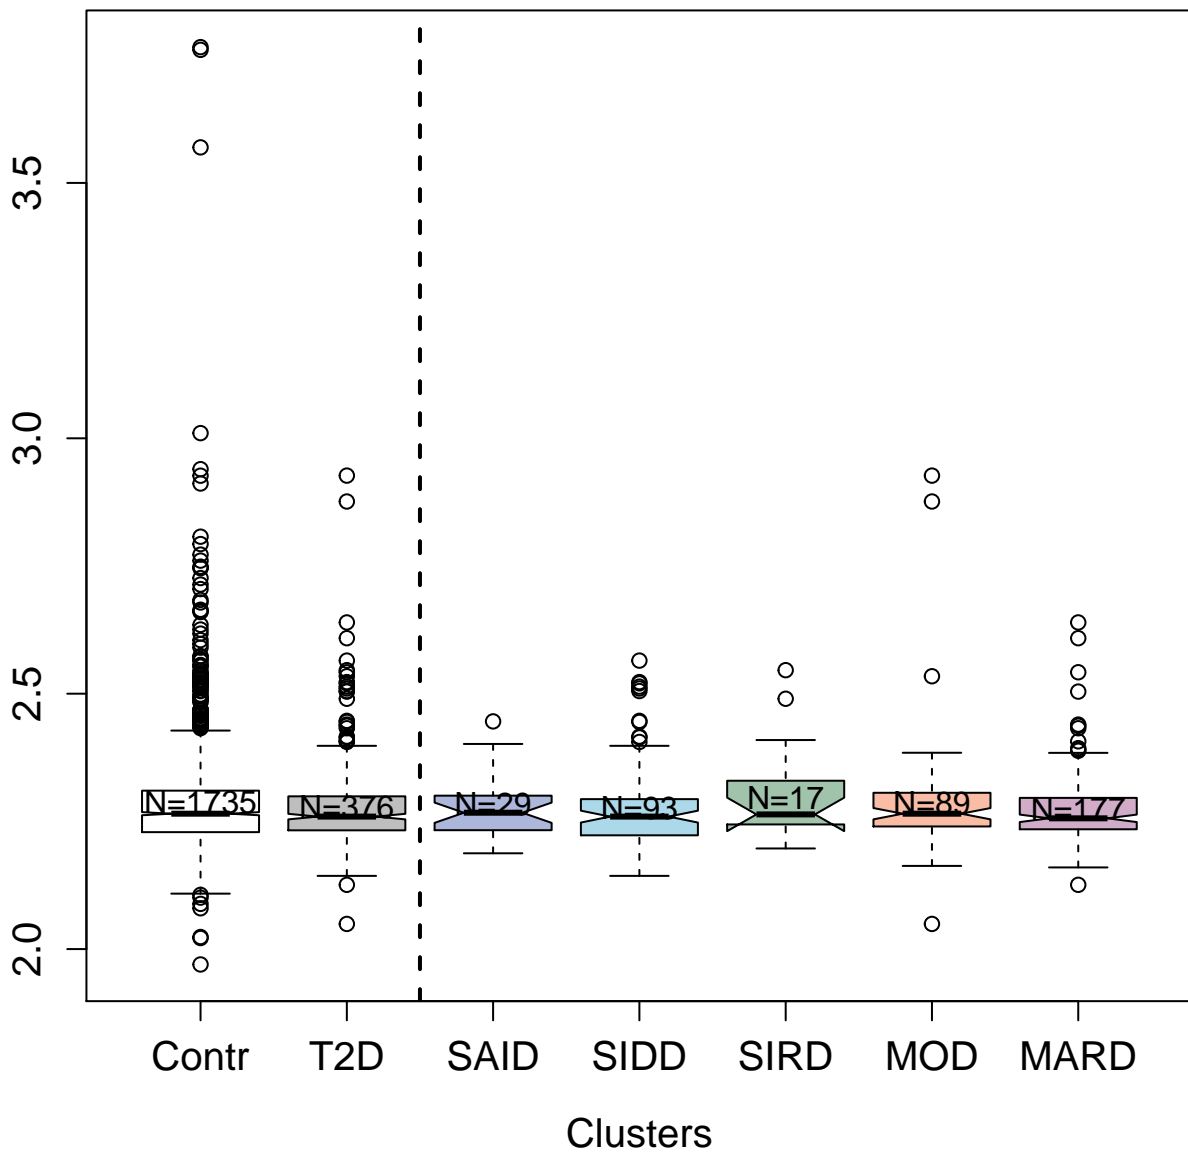

5792-8\_2 : alpha-Fetoprotein

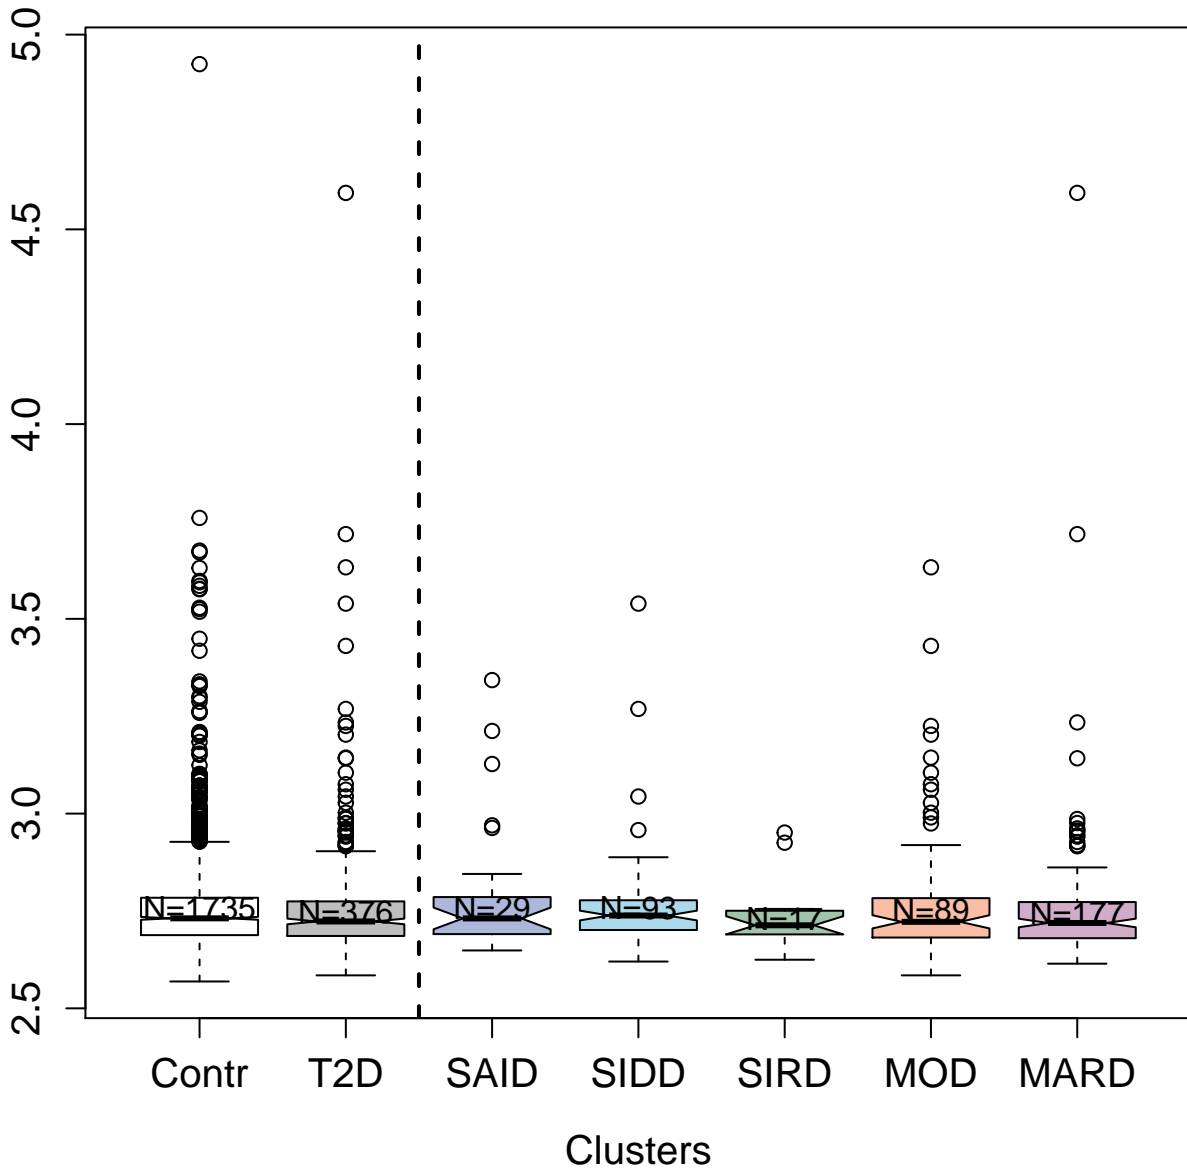

3583-54\_4 : Arylsulfatase A

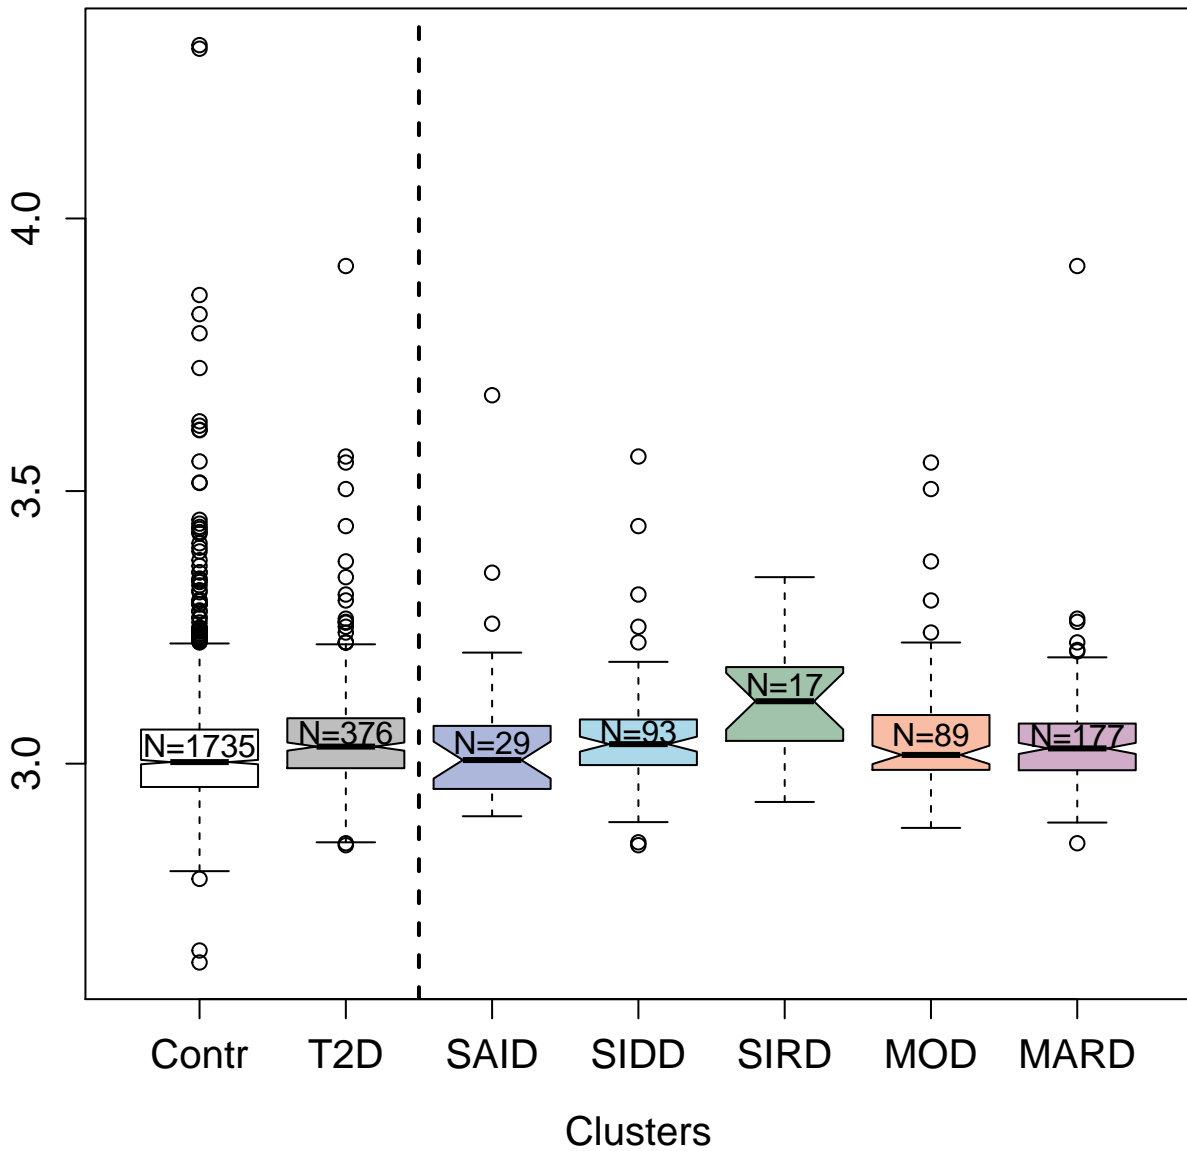

5090-49\_2 : Leukocyte immunoglobulin-like  
receptor subfamily B member 1

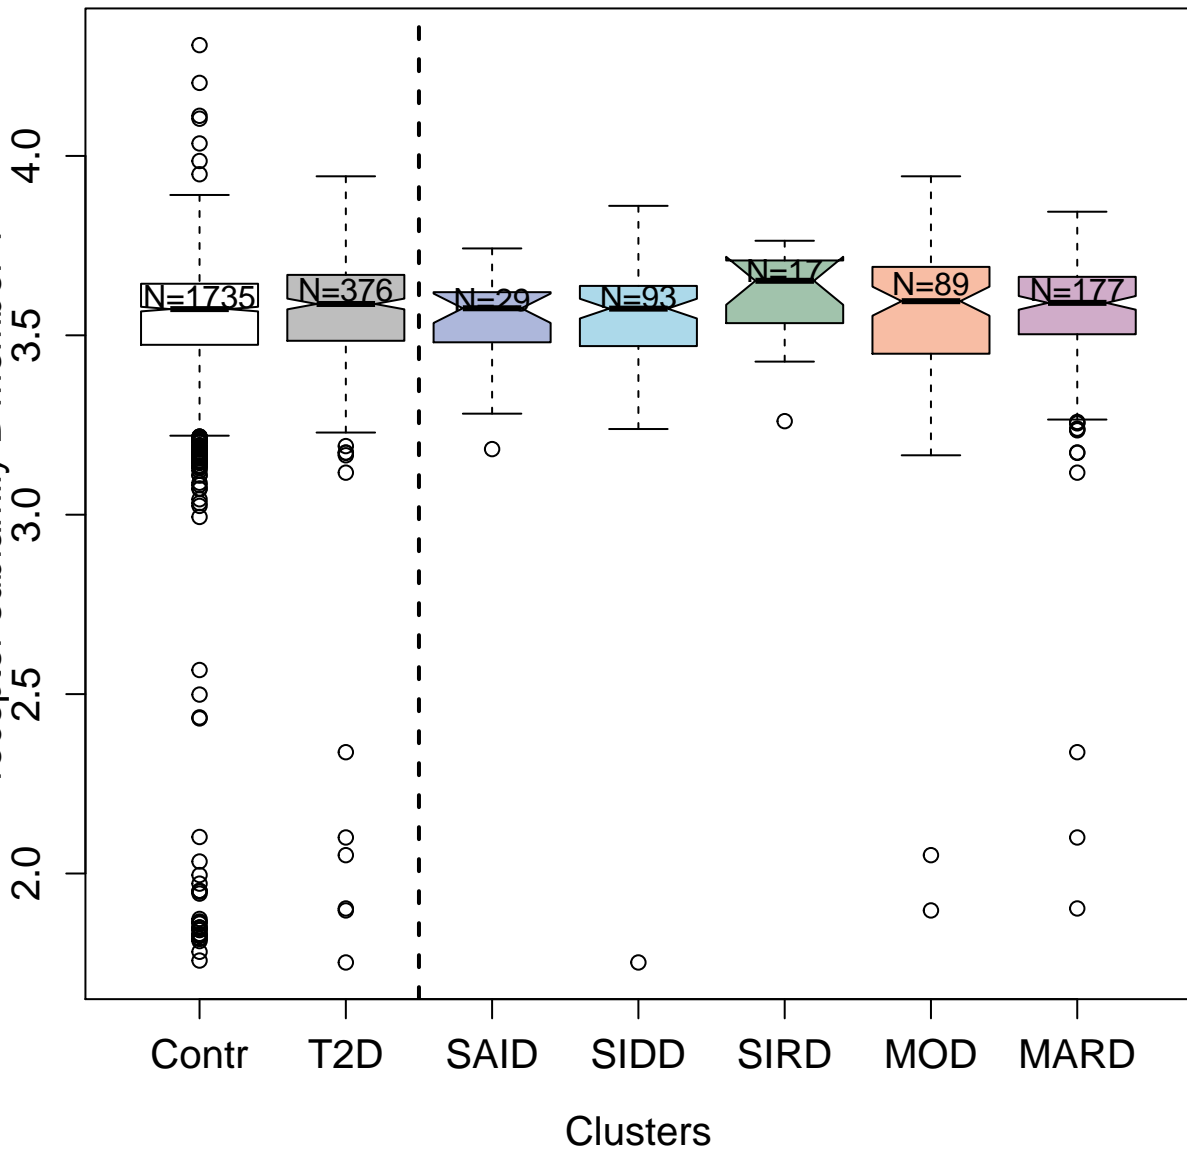

4785-30\_3 : Corticosteroid-binding globulin

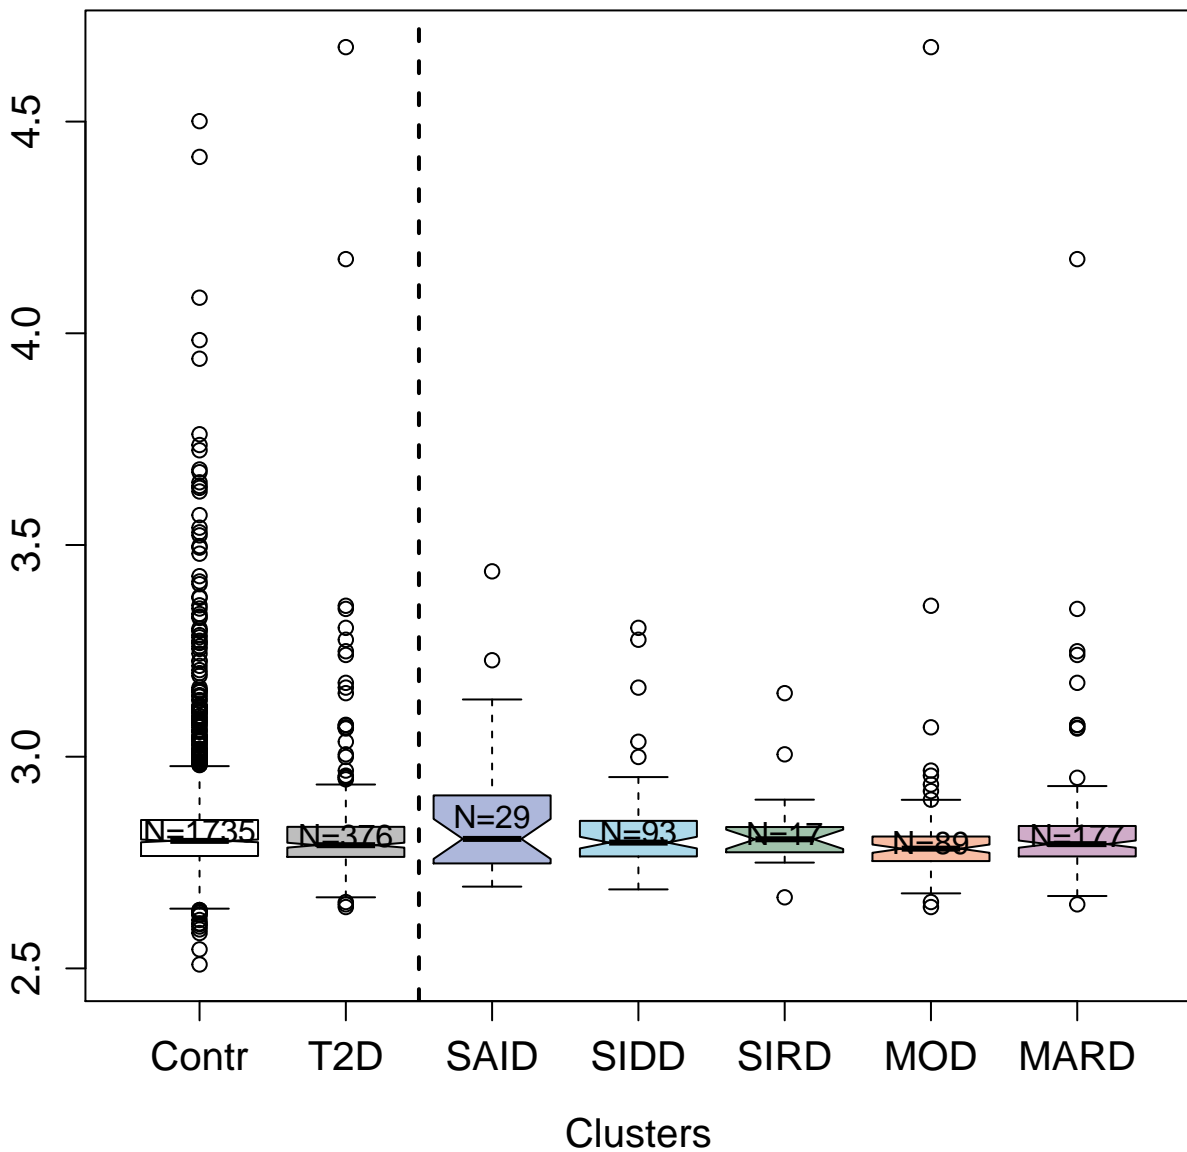

5204-13\_3 : Proteasome activator complex subunit

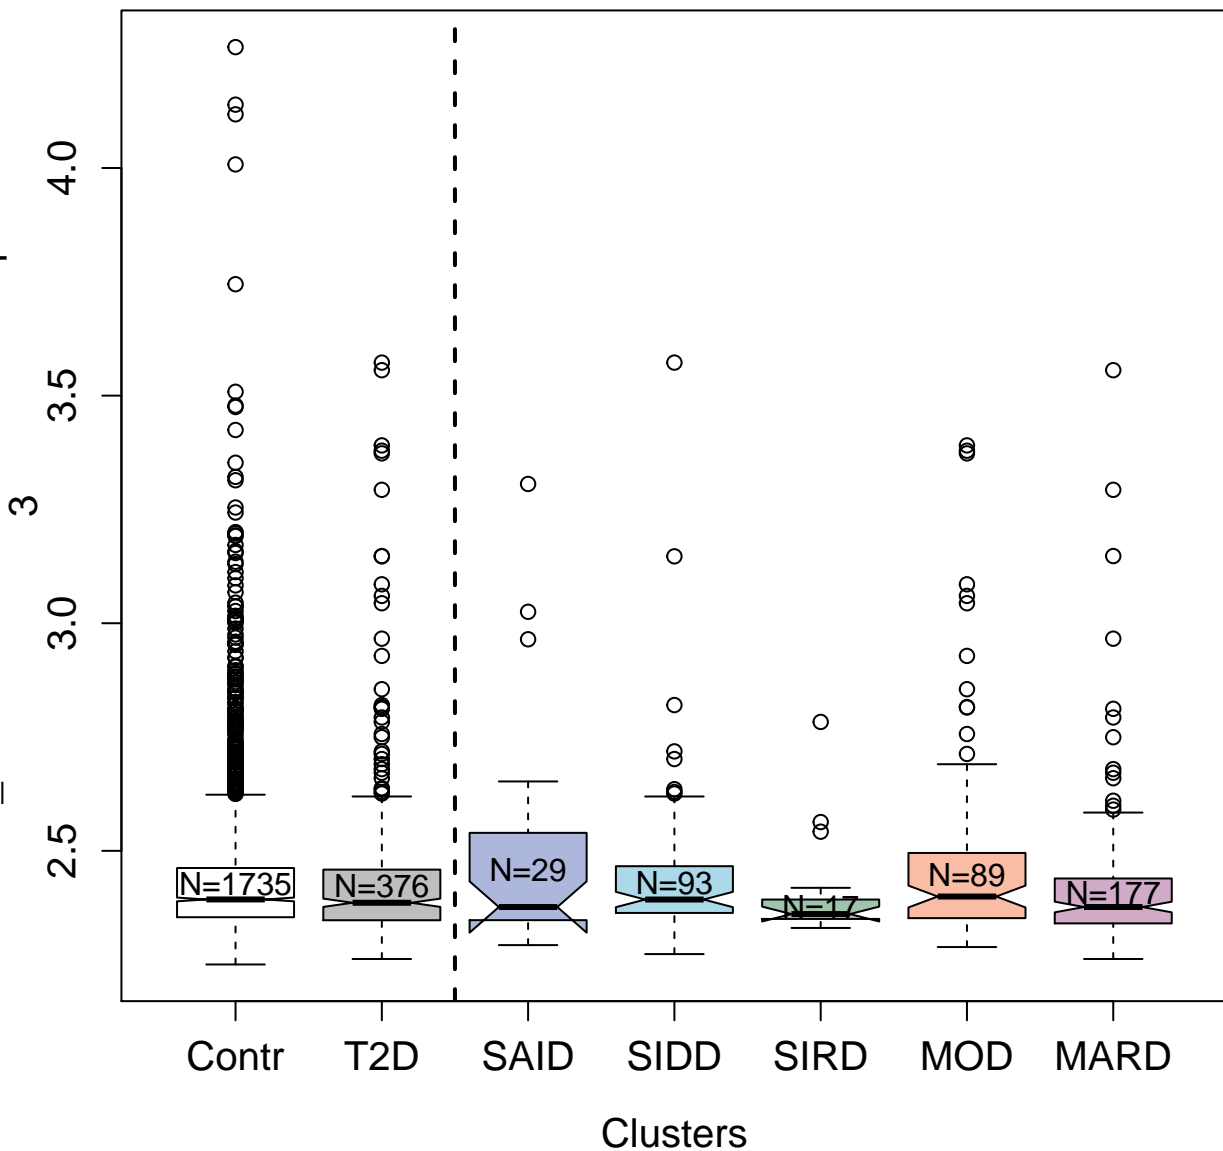



3235-50\_2 : WAP; Kazal; immunoglobulin; Kunitz  
and NTR domain-containing protein 2

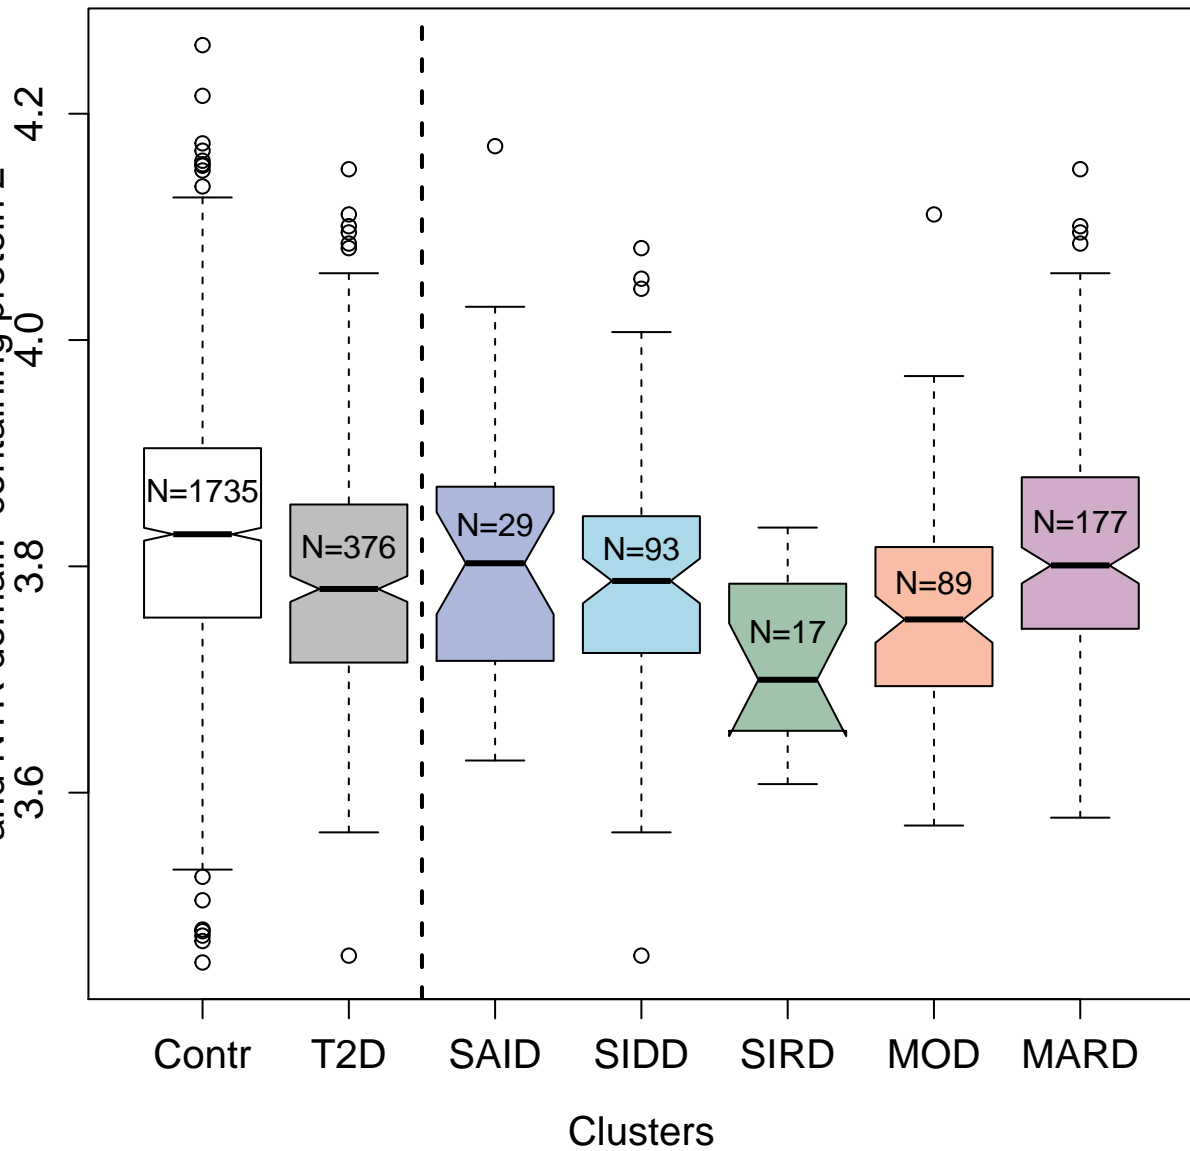

2993-1\_2 : Interleukin-18 receptor accessory protein

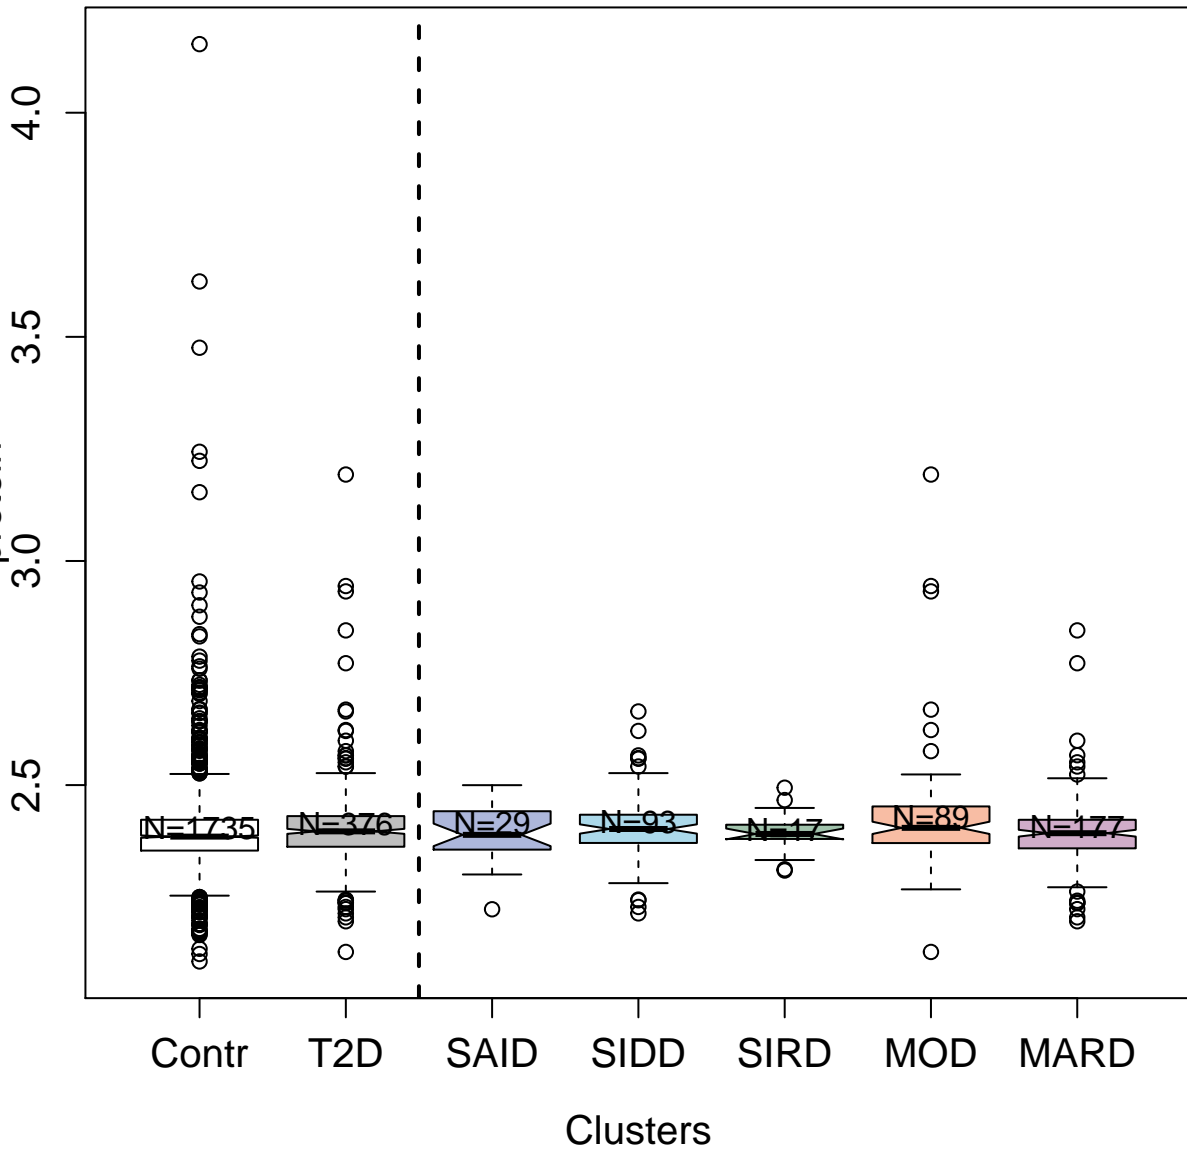

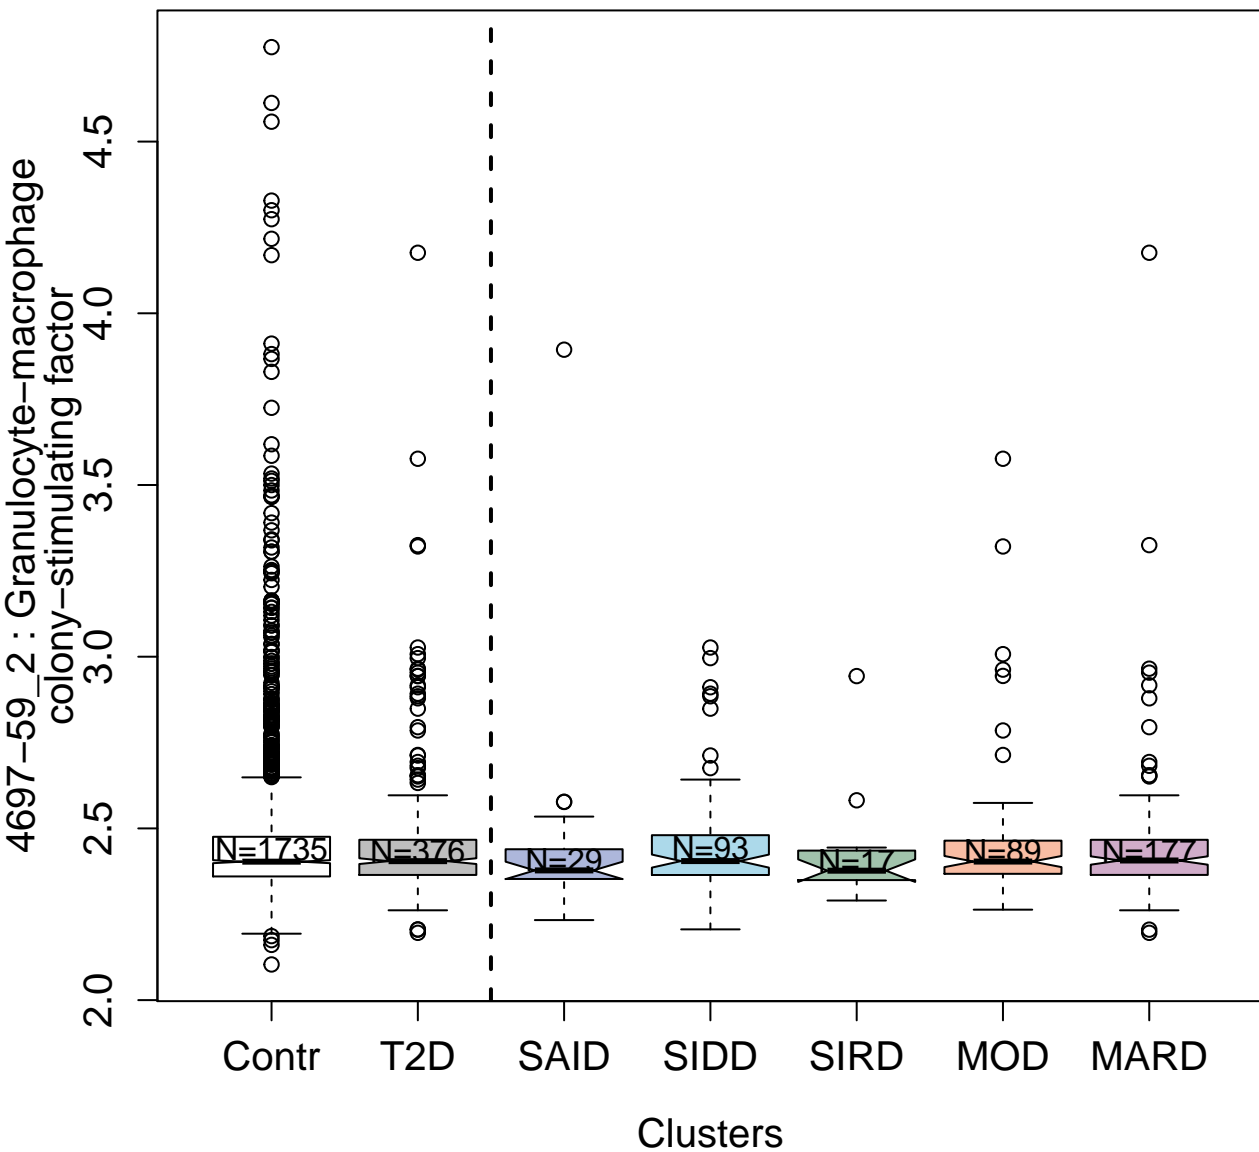

3056-11\_1 : NKG2-D type II integral membrane protein

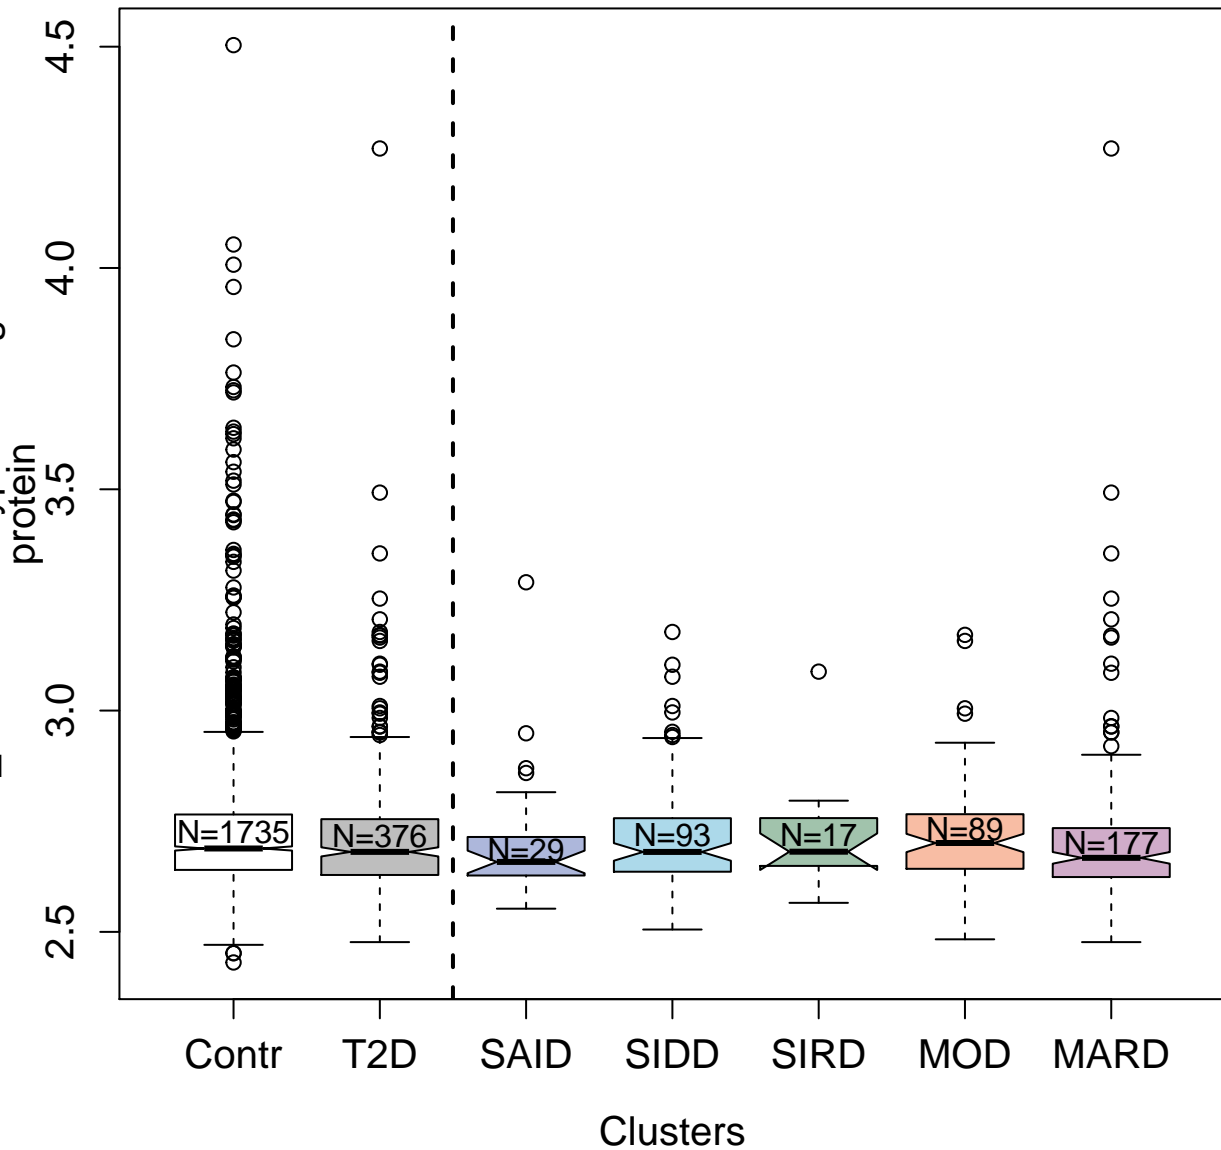

2945-25\_1 : Estrogen receptor

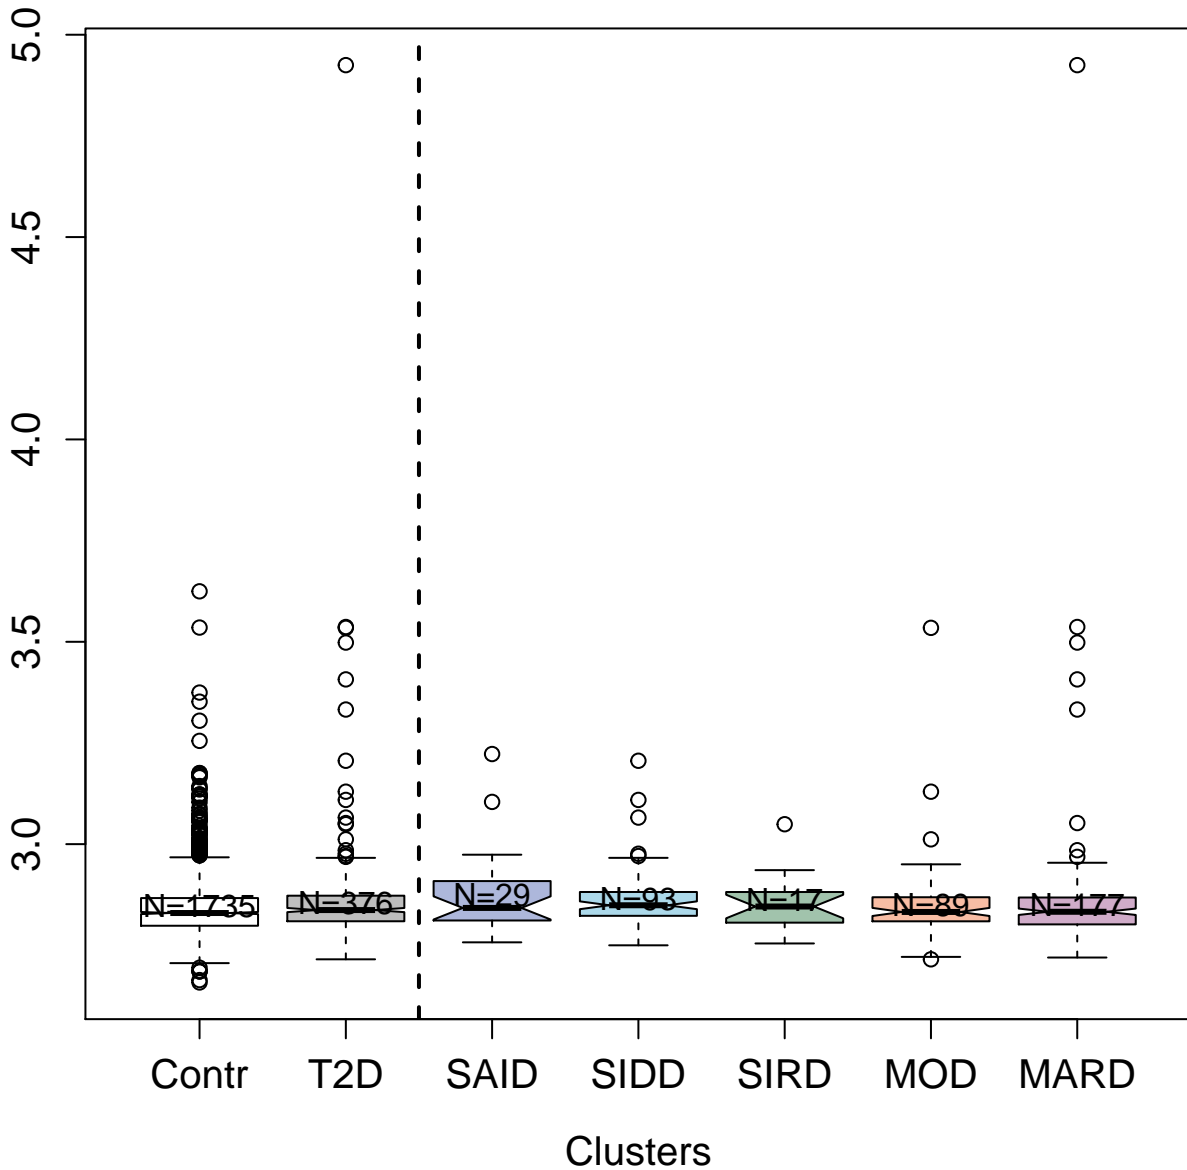

5308-89\_2 : Neutrophil elastase

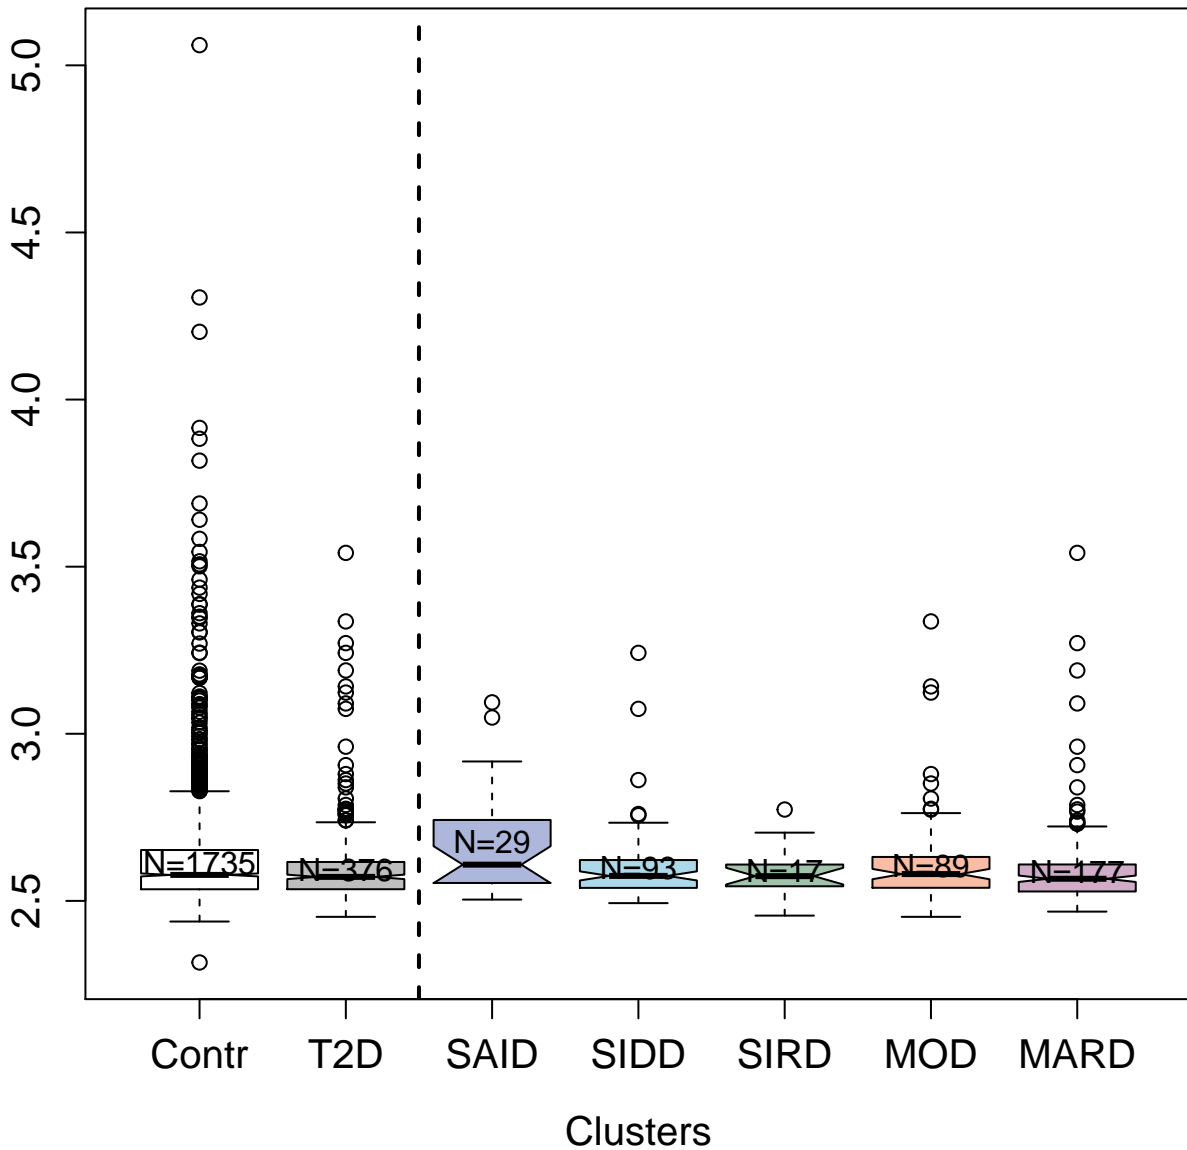

4718-5\_2 : Peptidyl-prolyl cis-trans isomerase B

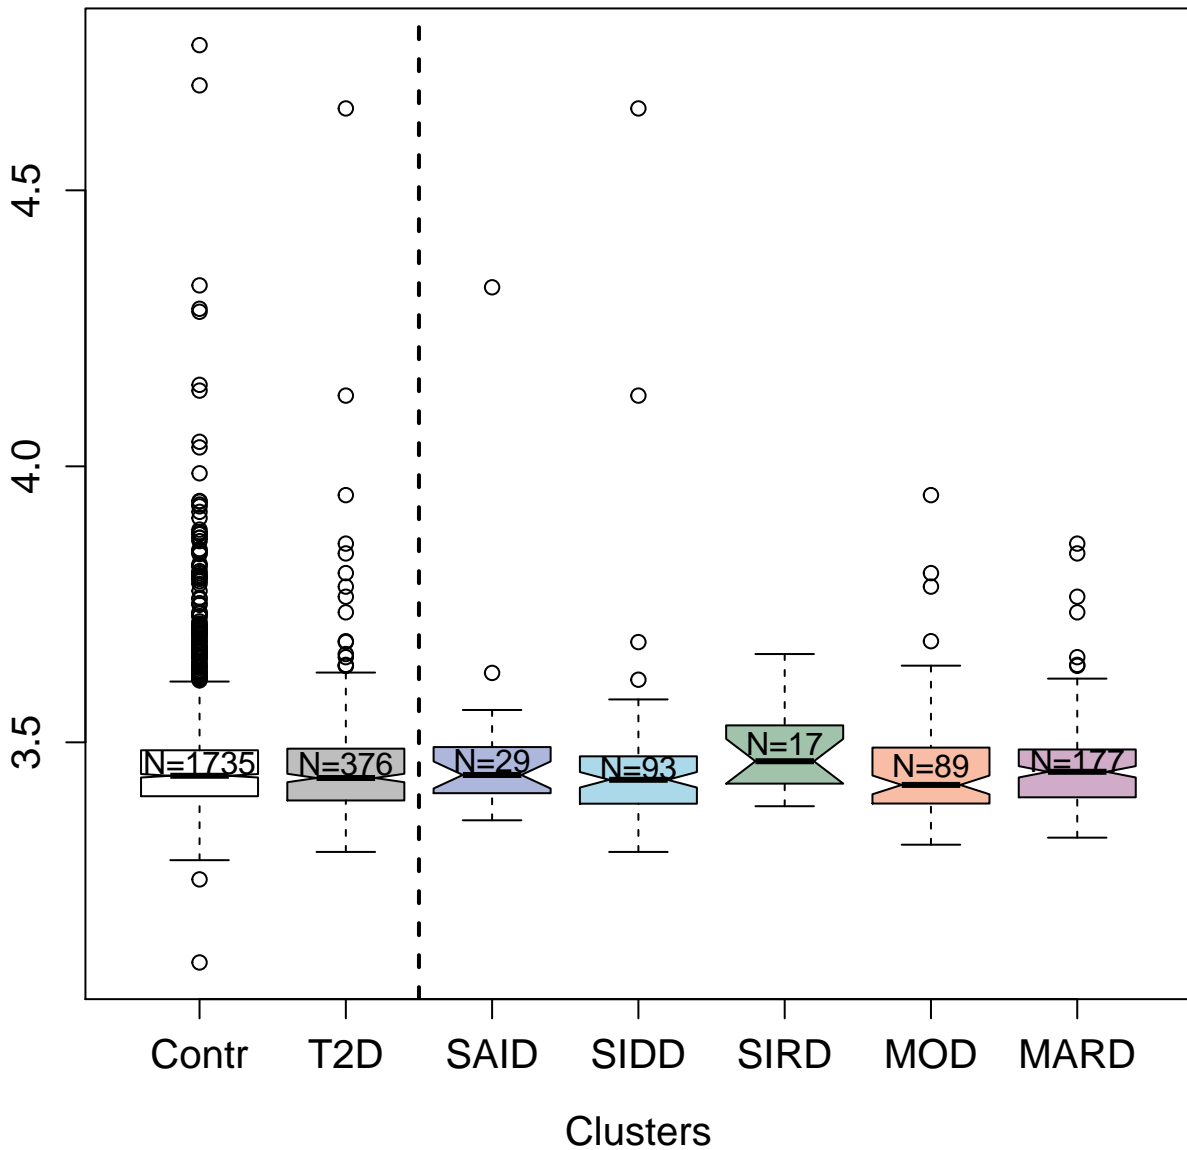

2857-70\_2 : Glucocorticoid receptor

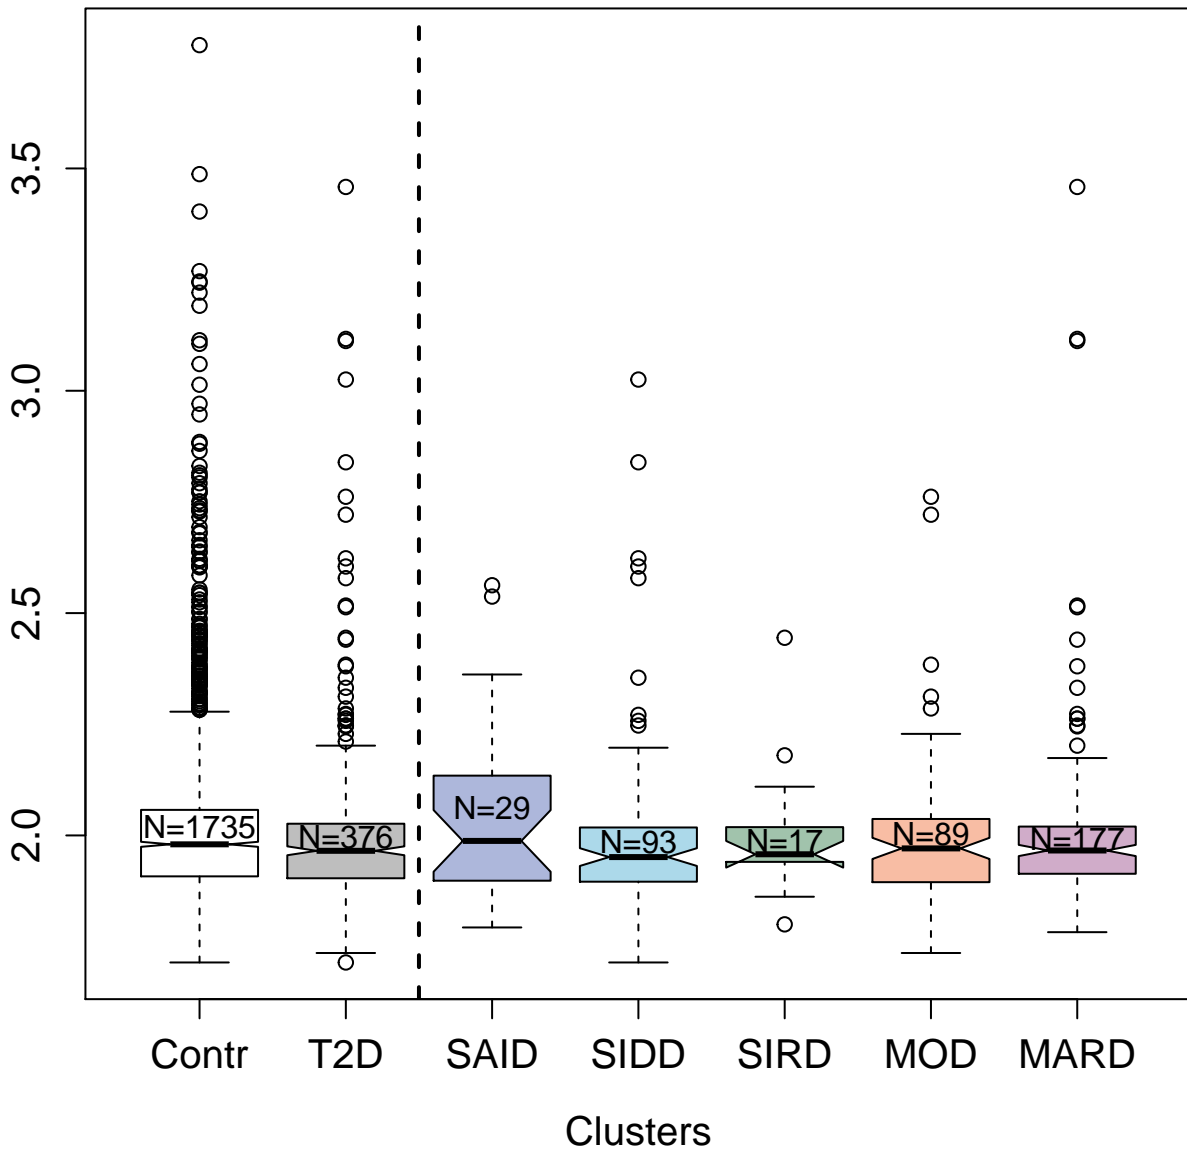



3800-71\_2 : Creatine kinase B-type

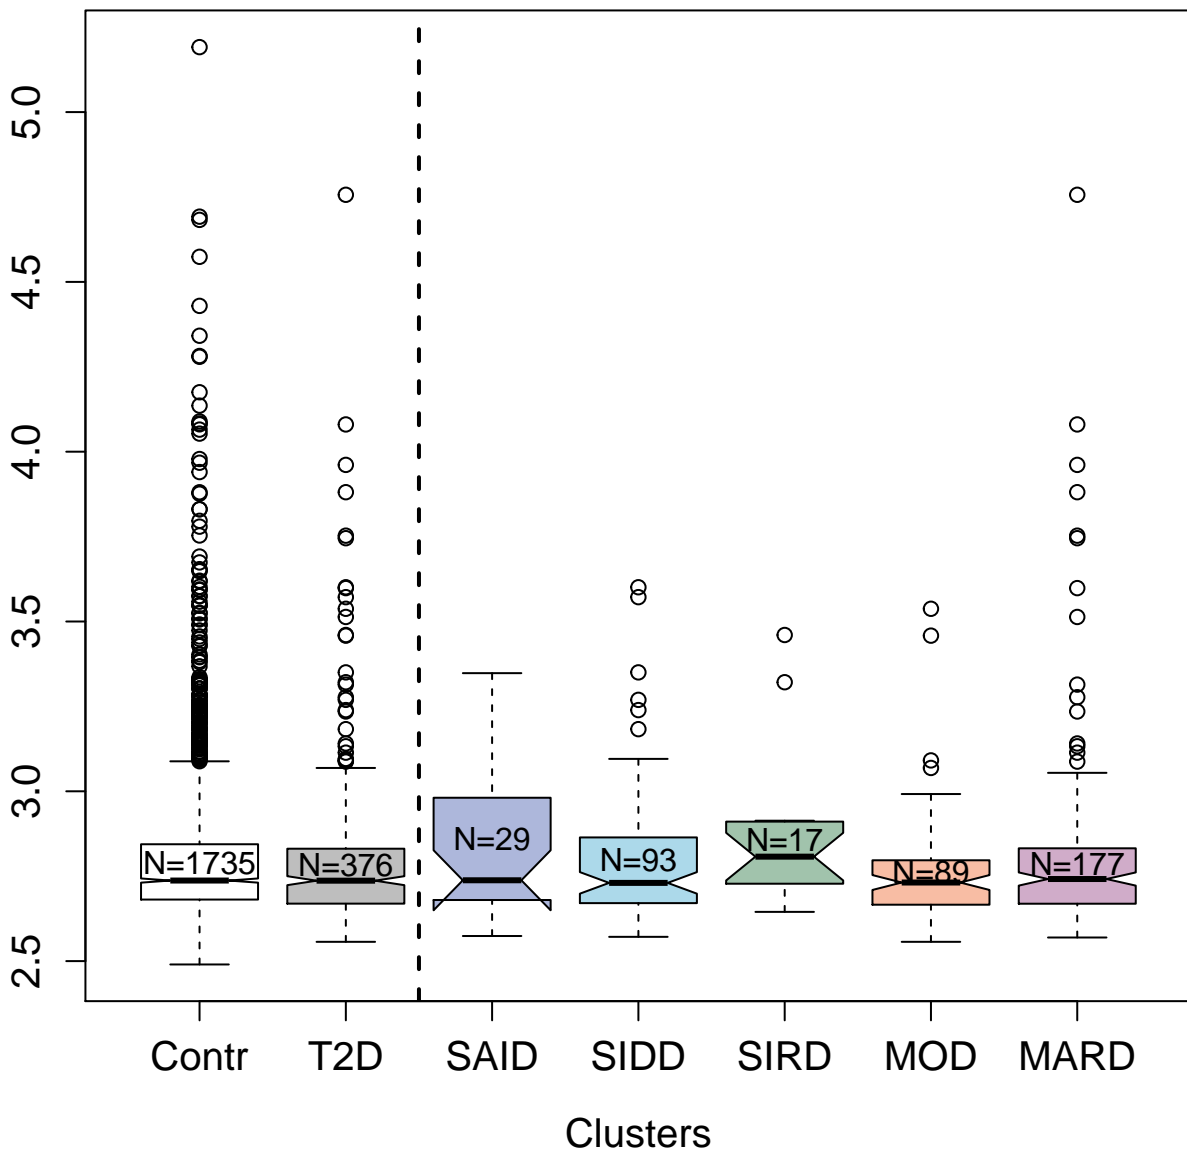

3050-7\_2 : von Willebrand factor

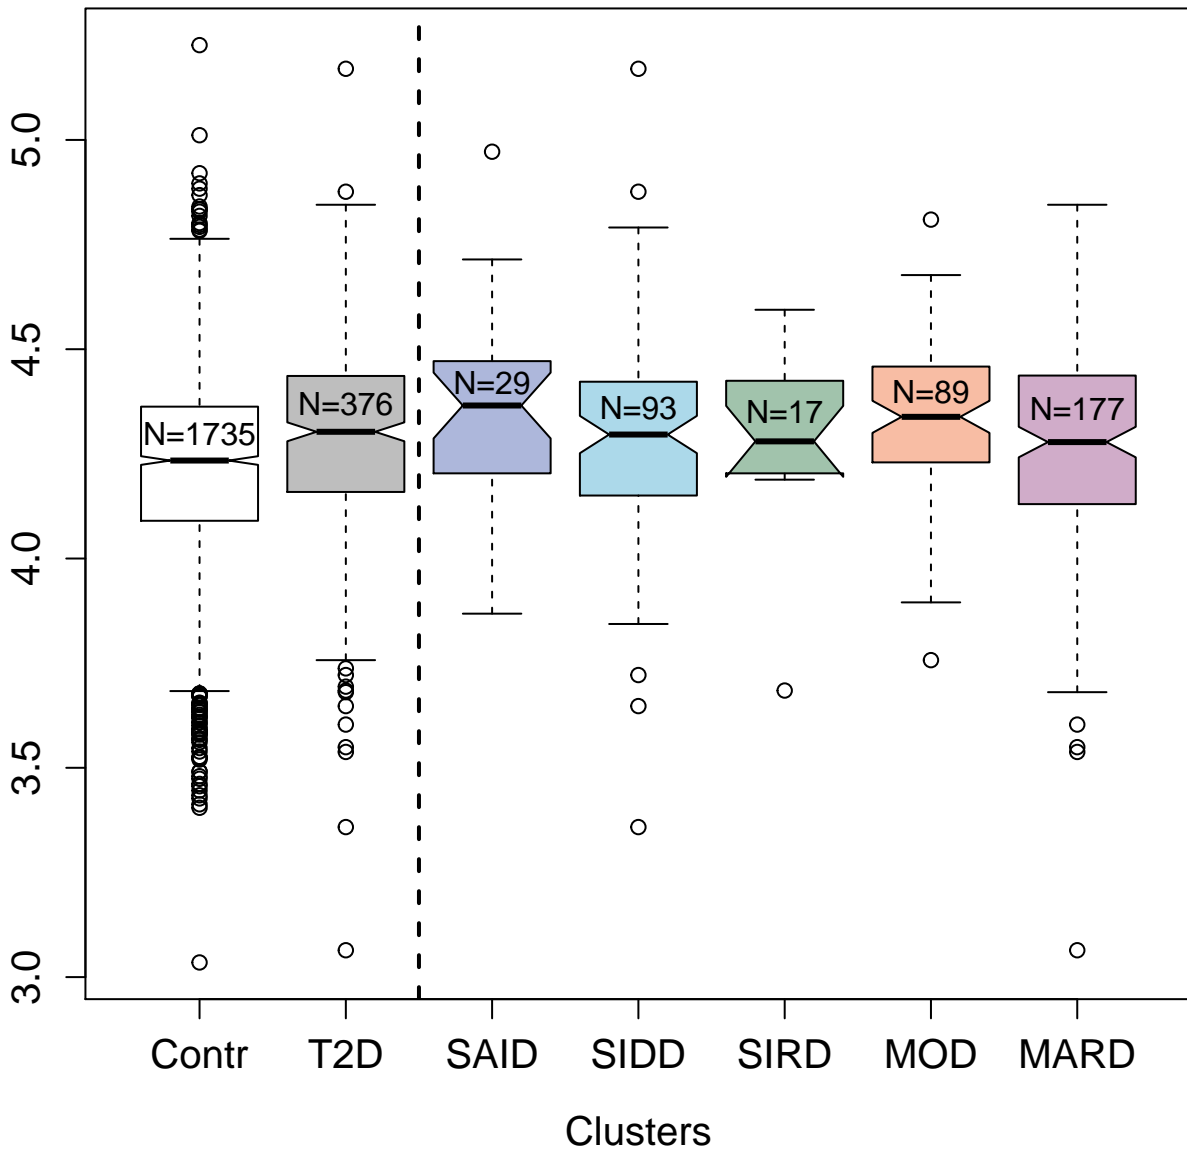

5301-7\_3 : Eotaxin

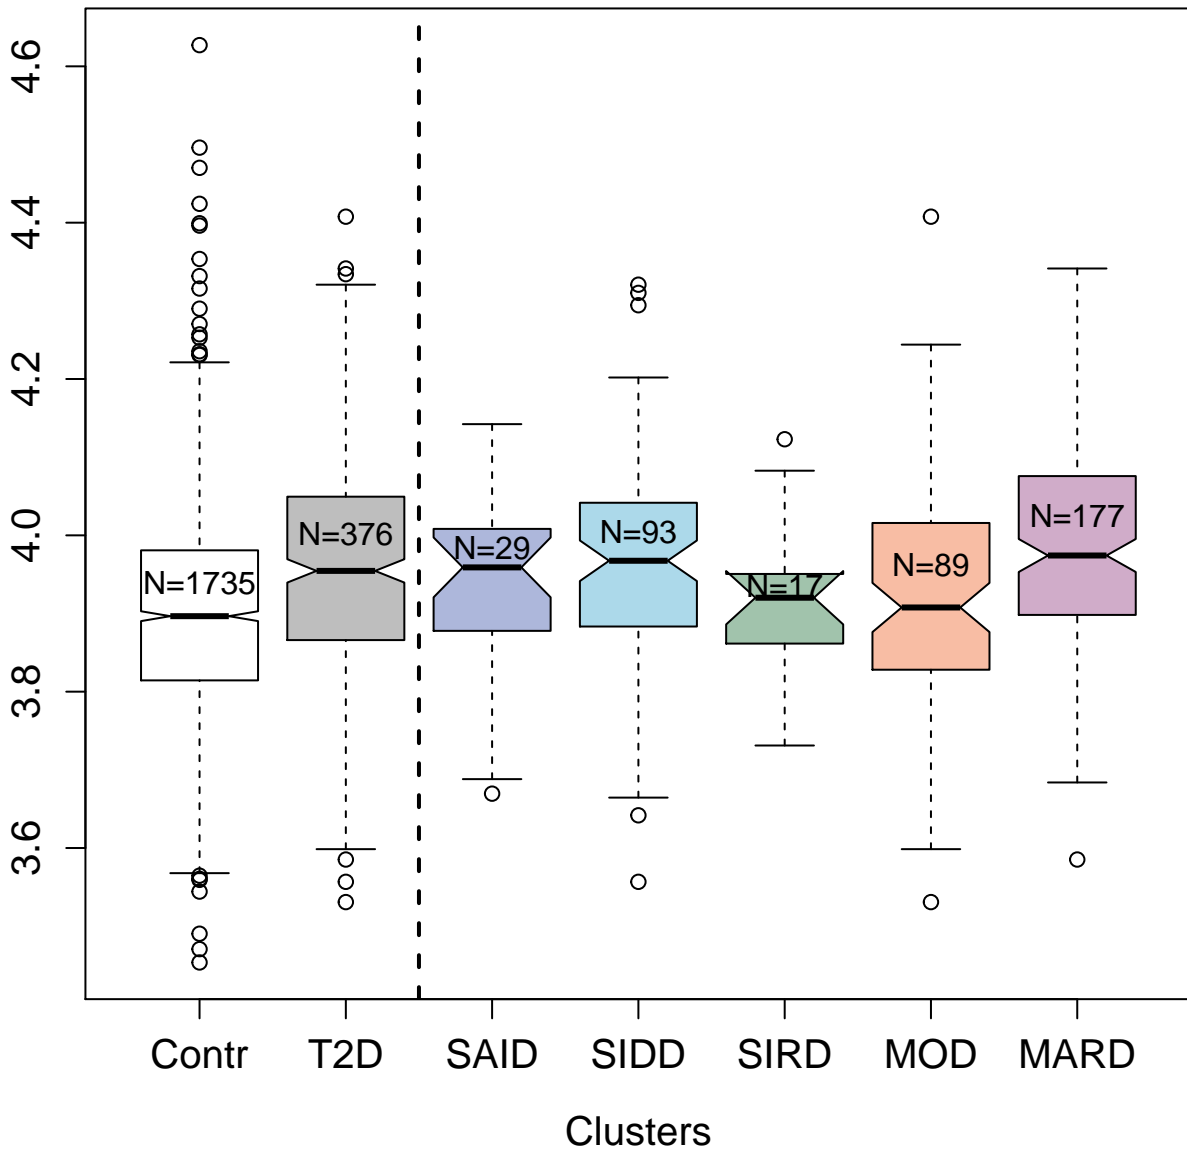

5255-22\_3 : cAMP-specific 3';5'-cyclic  
phosphodiesterase 4D

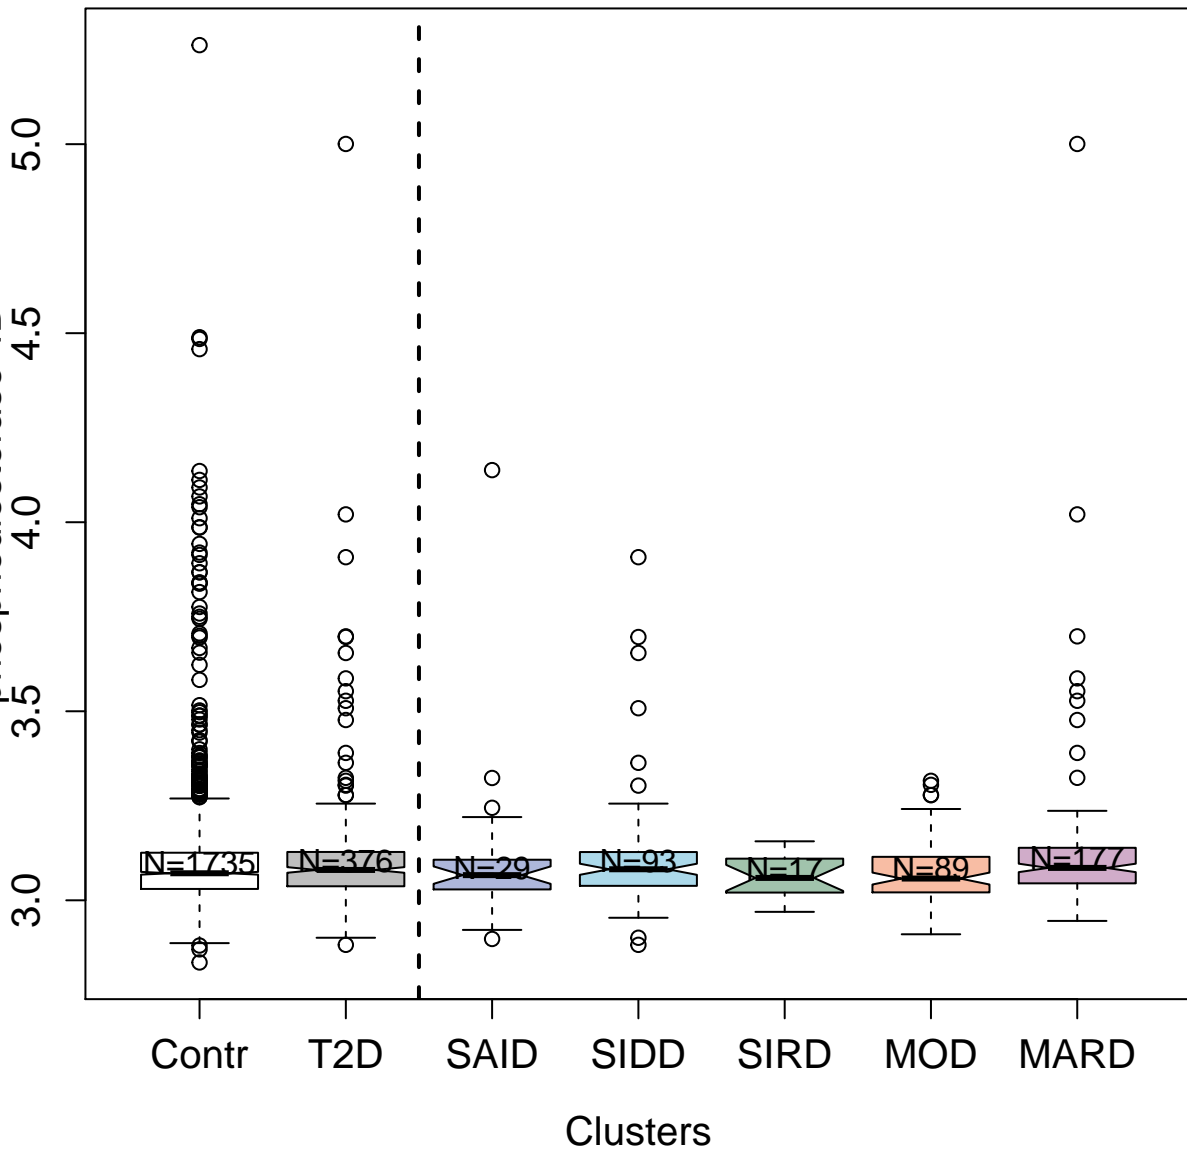

10990-21\_3 : Leucine-rich repeat  
serine/threonine-protein kinase 2

5.0

4.5

4.0

3.5

Contr

T2D

SAID

SIDD

SIRD

MOD

MARD

Clusters

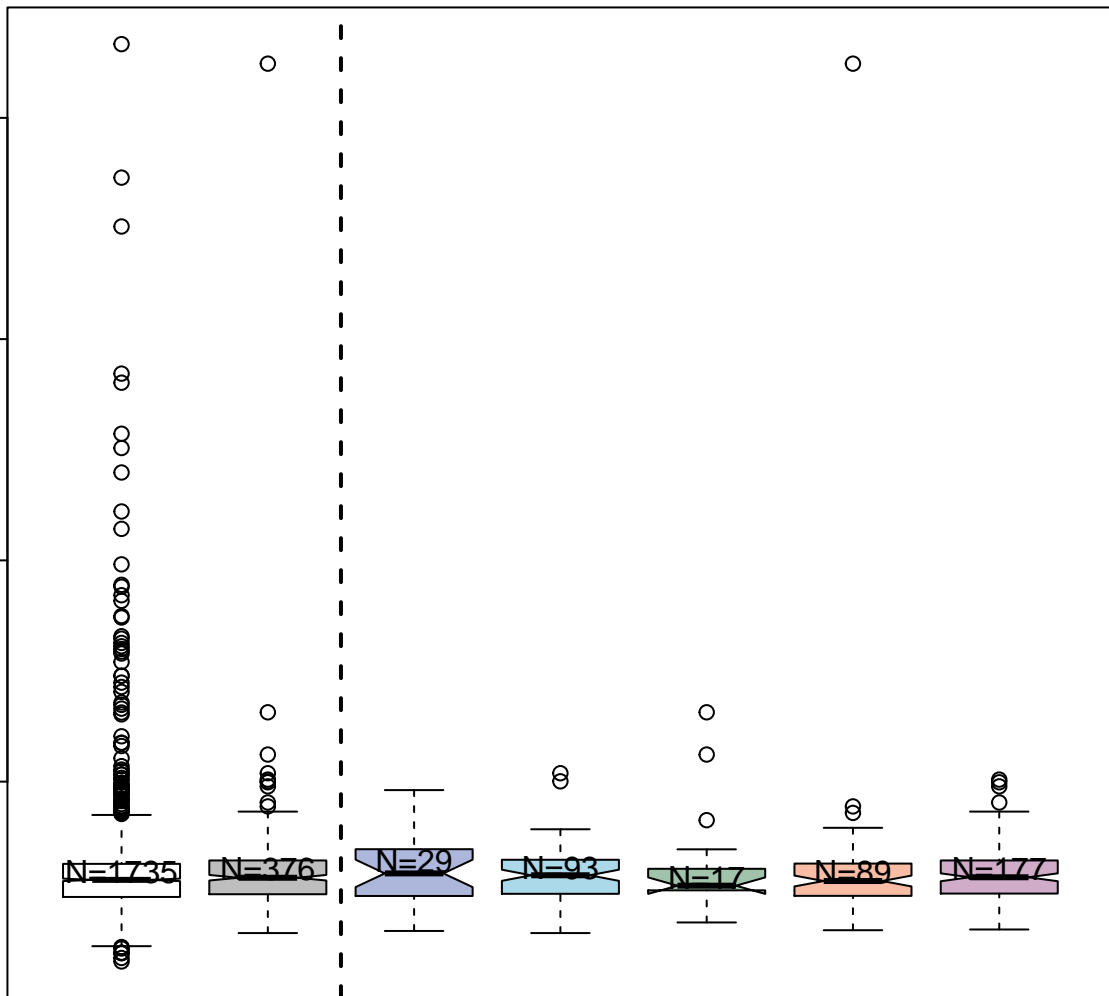

3388-58\_2 : Serine/threonine-protein kinase PAK 7

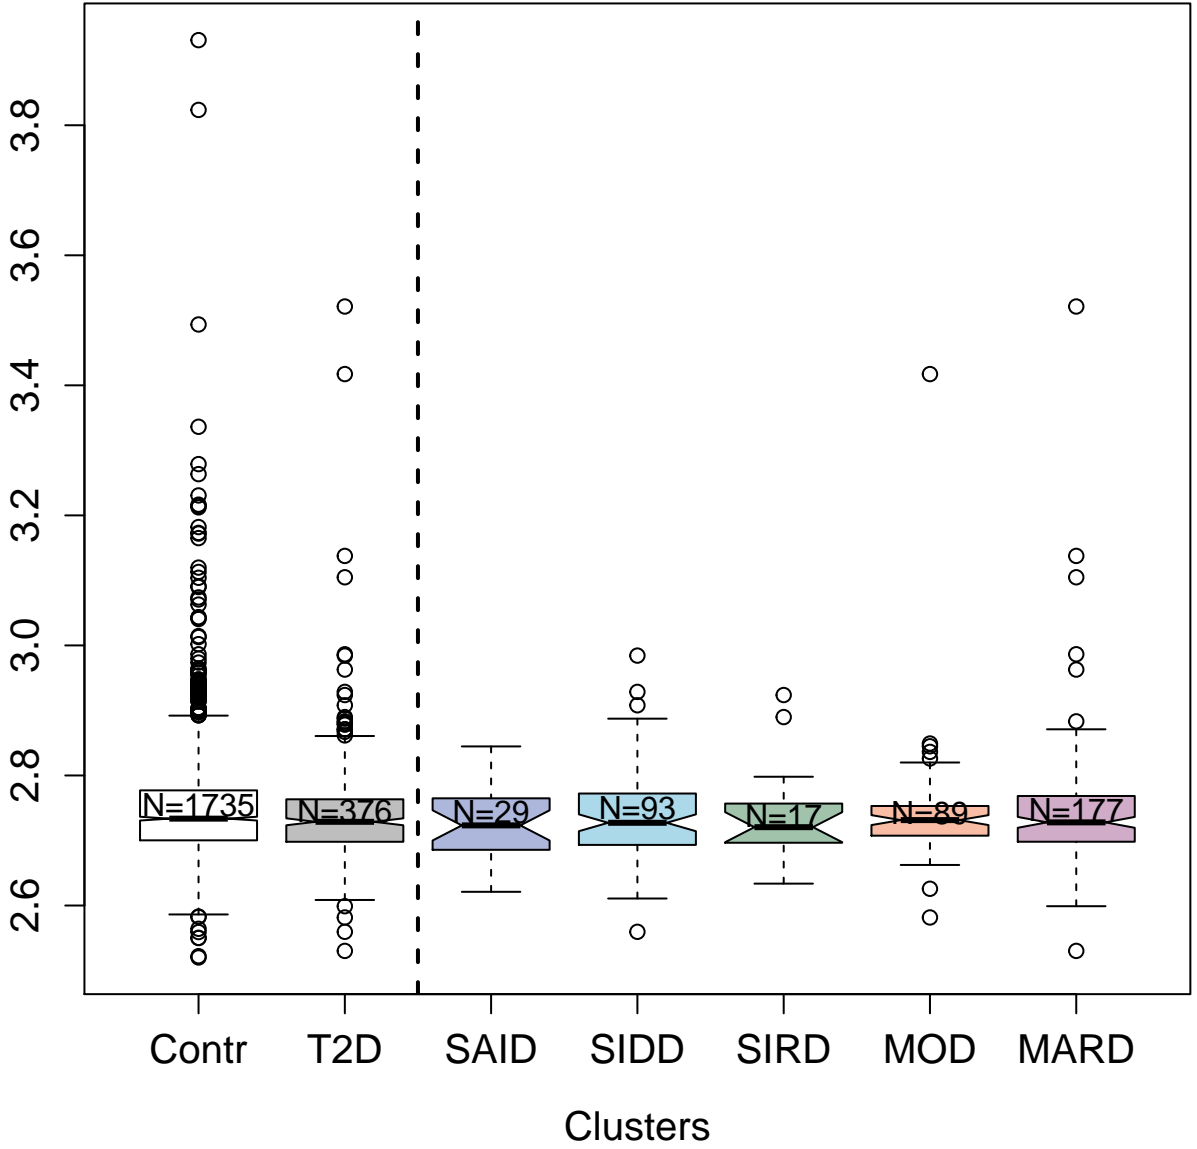

3634-5\_4 : Opioid-binding protein/cell adhesion molecule

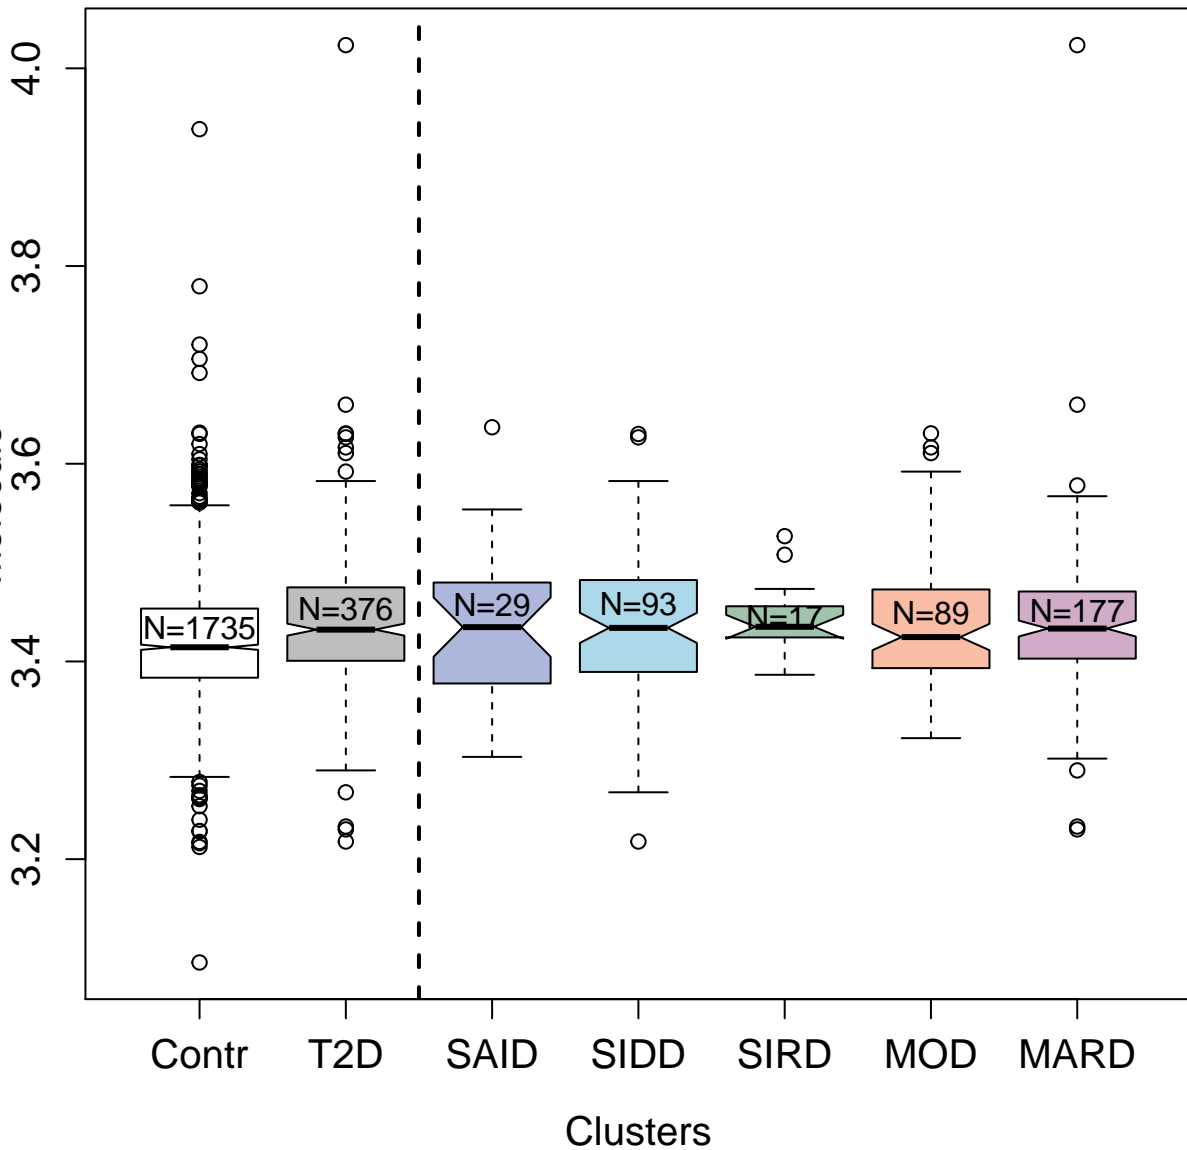

5441-67\_3 : Troponin I; cardiac muscle

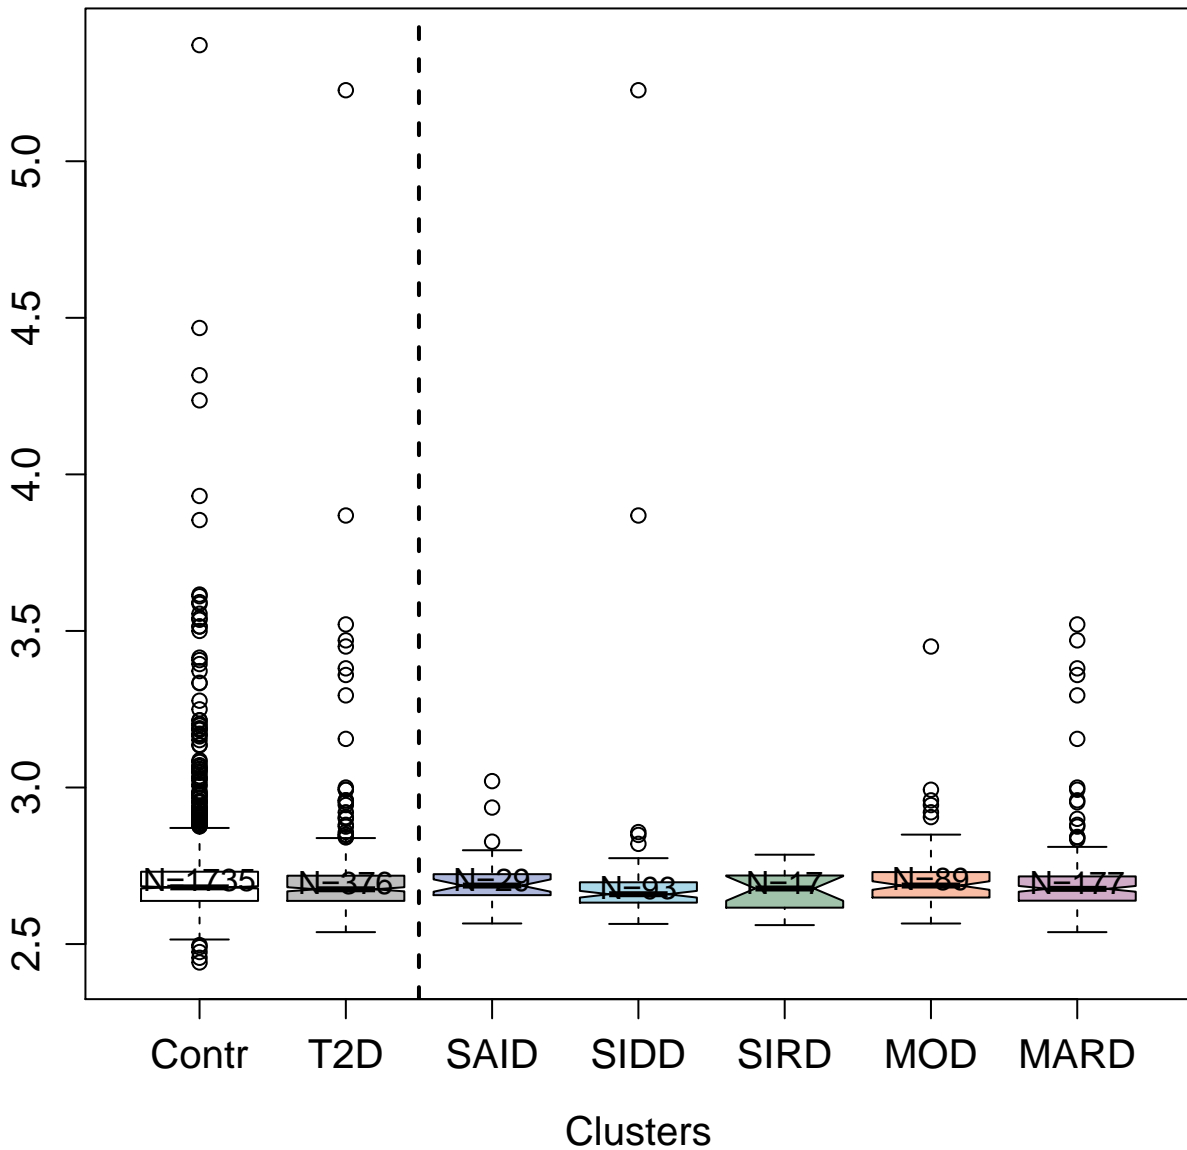



2514-65\_3 : Ephrin-B3

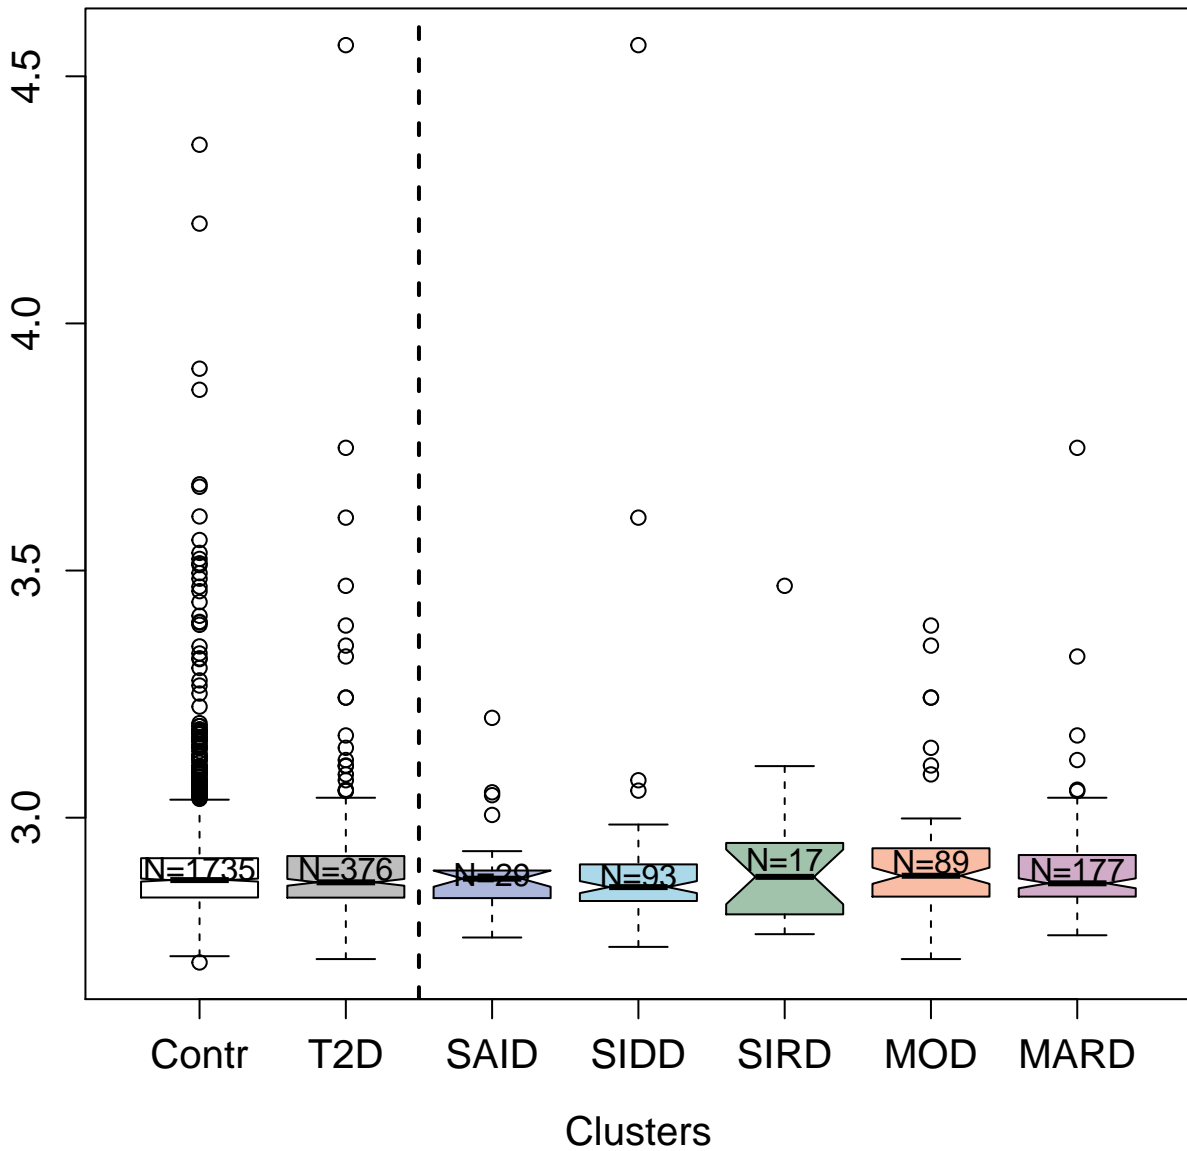

3217-74\_2 : Glia-derived nexin

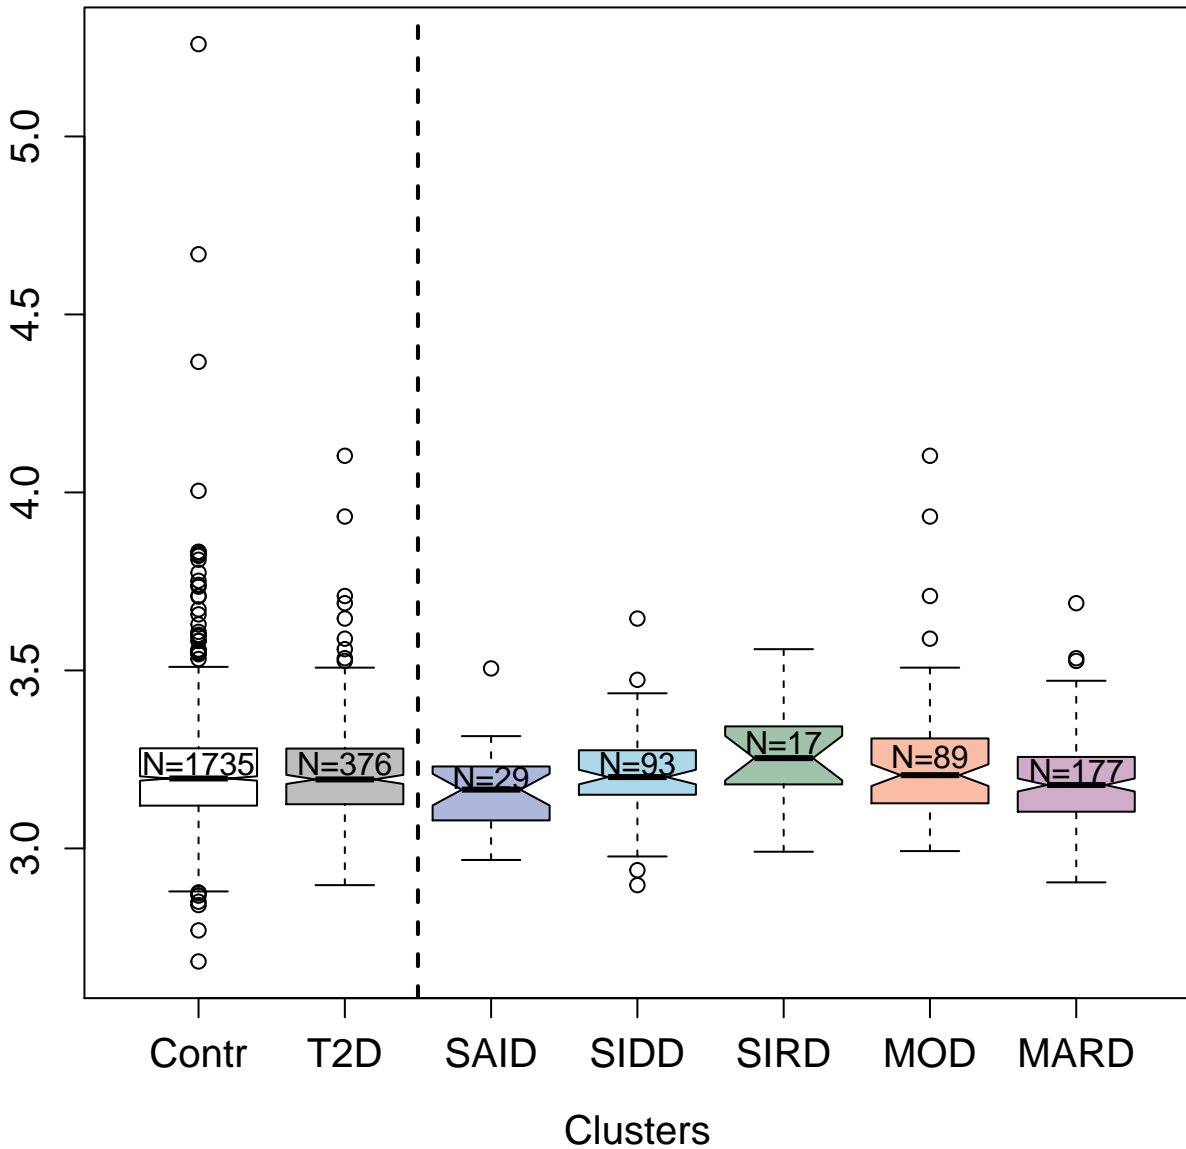

3617-80\_4 : Hepatocyte growth factor activator

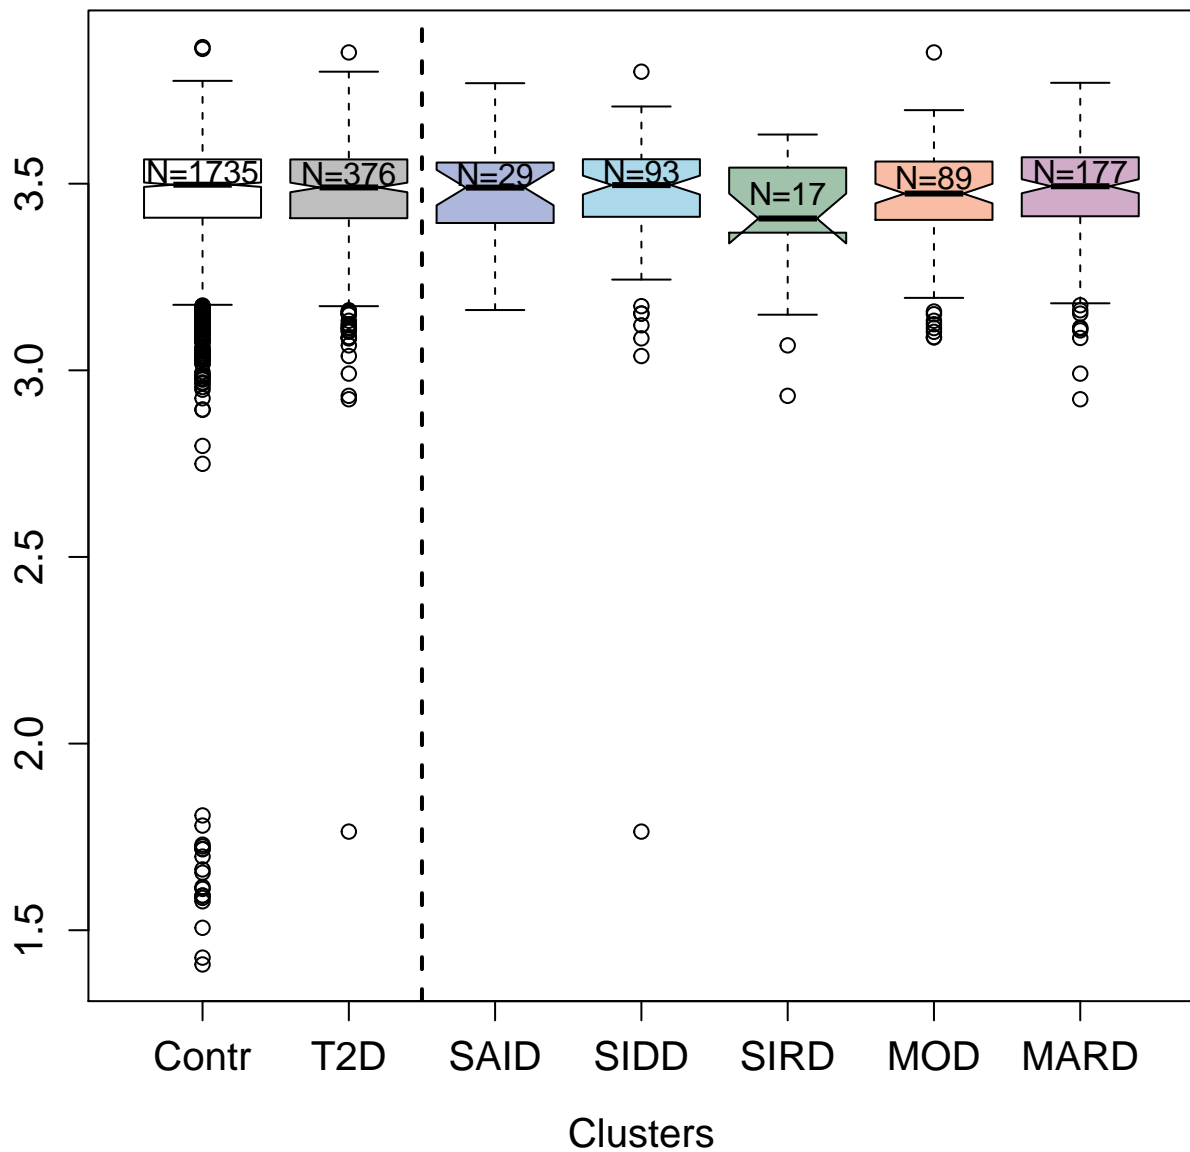

2809-25\_2 : A disintegrin and metalloproteinase  
with thrombospondin motifs 4

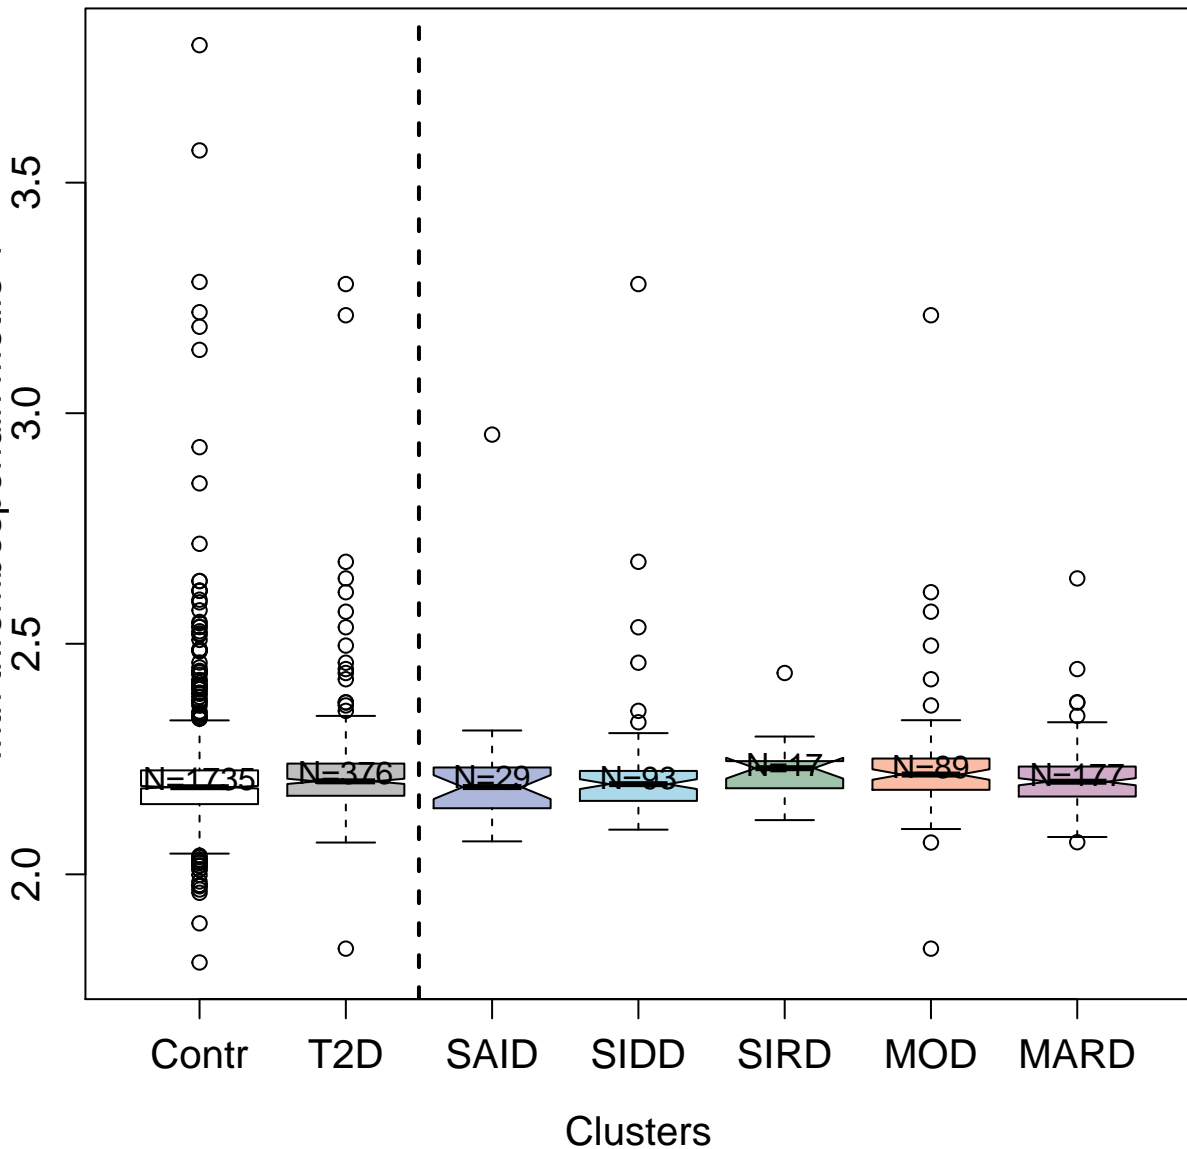

3828-54\_2 : Platelet-derived growth factor C

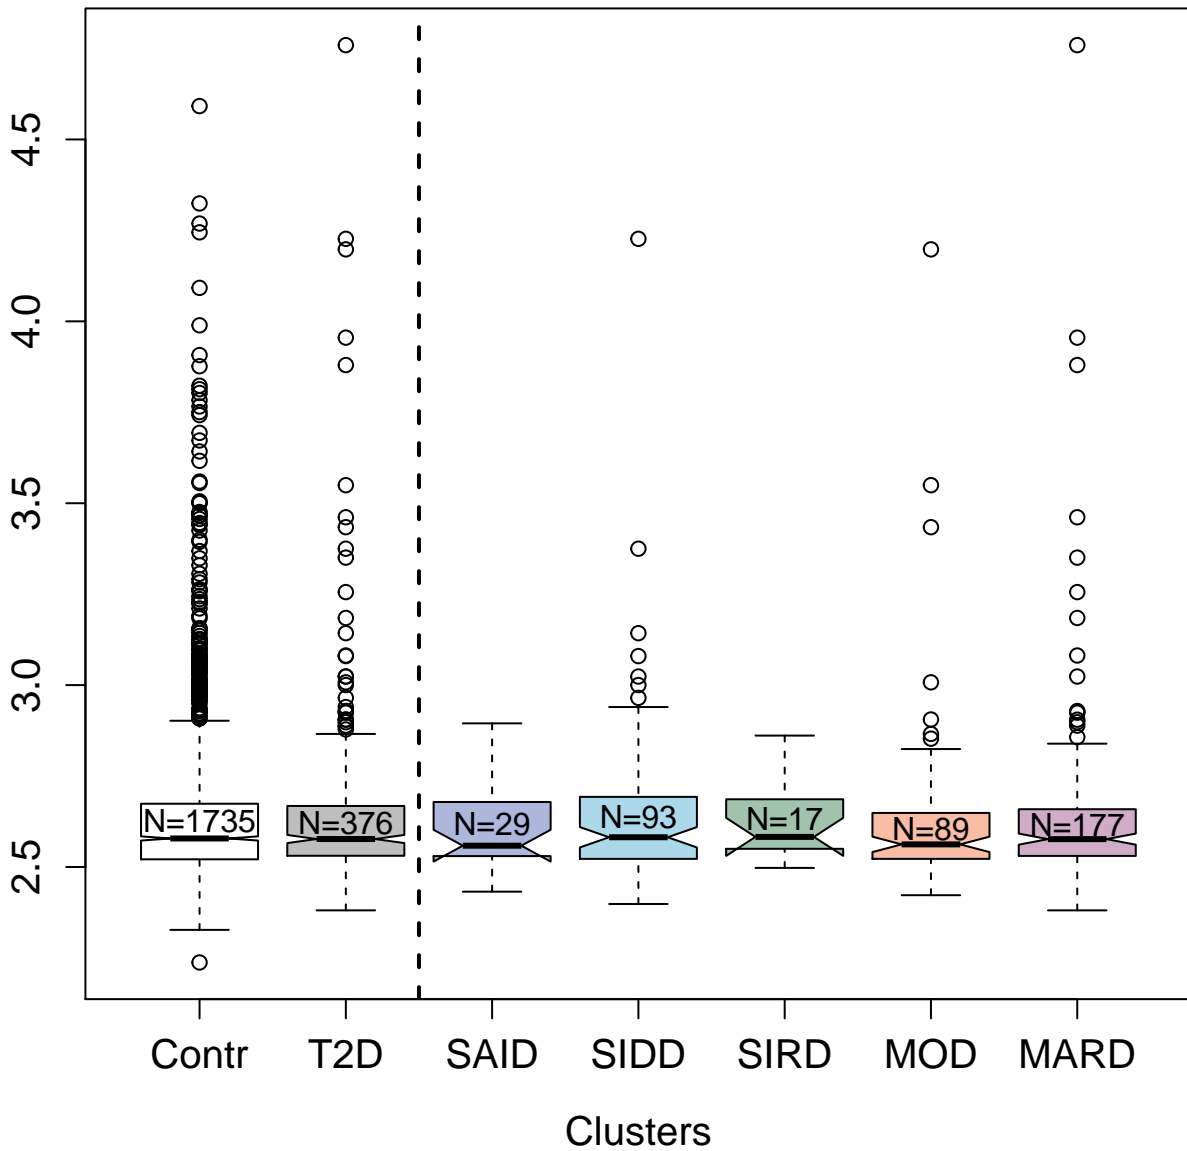

3459-49\_2 : Platelet-derived growth factor receptor beta

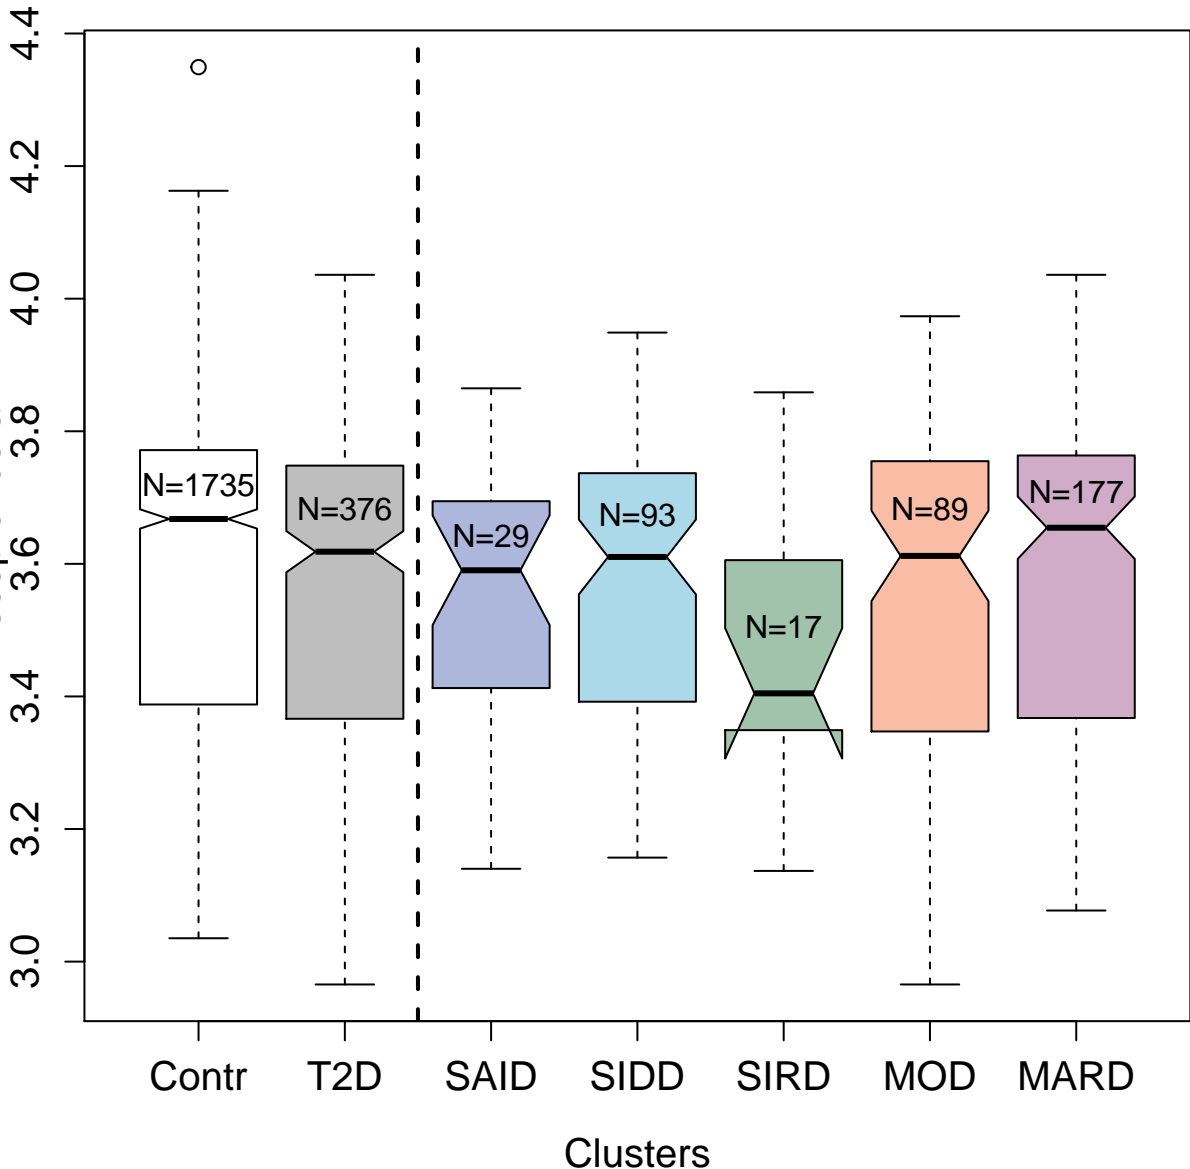

4900-8\_1 : C3a anaphylatoxin

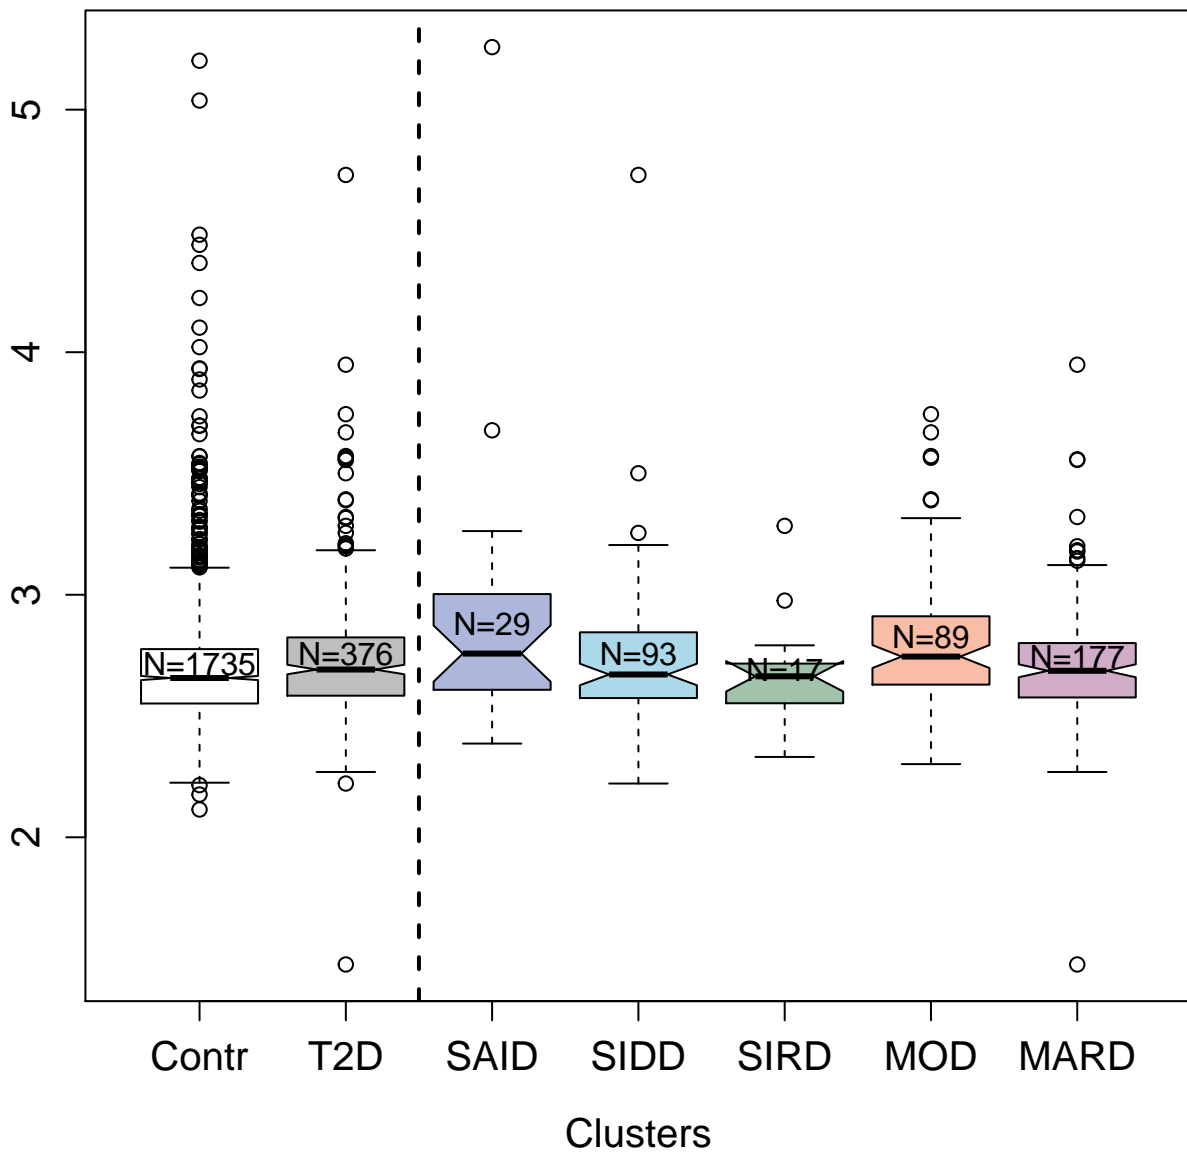

3519-3\_2 : C-C motif chemokine 17

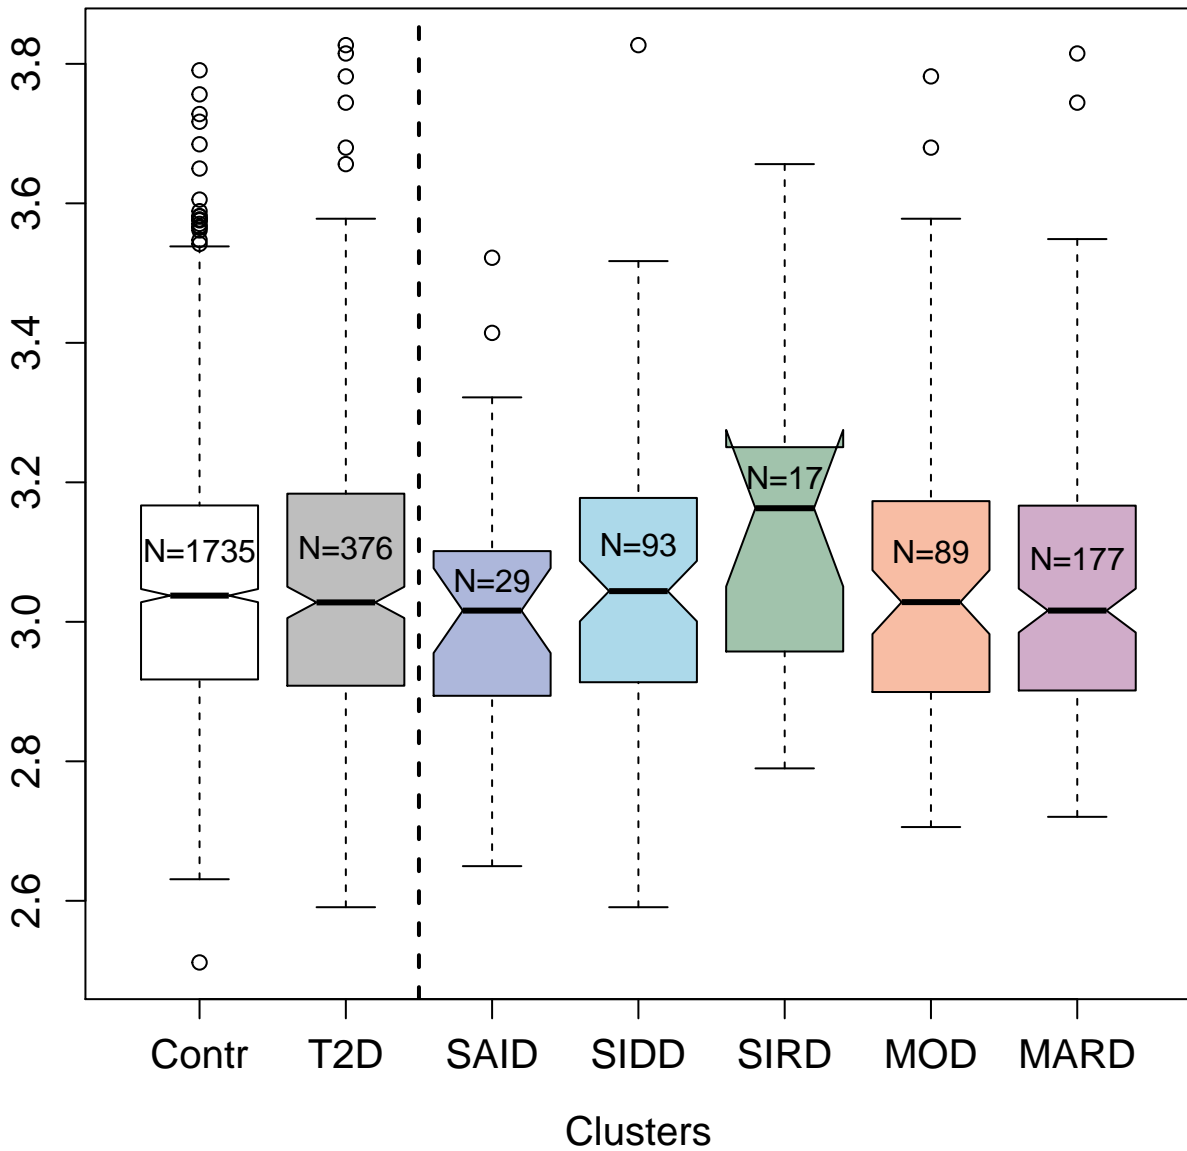



3298-52\_2 : Contactin-4

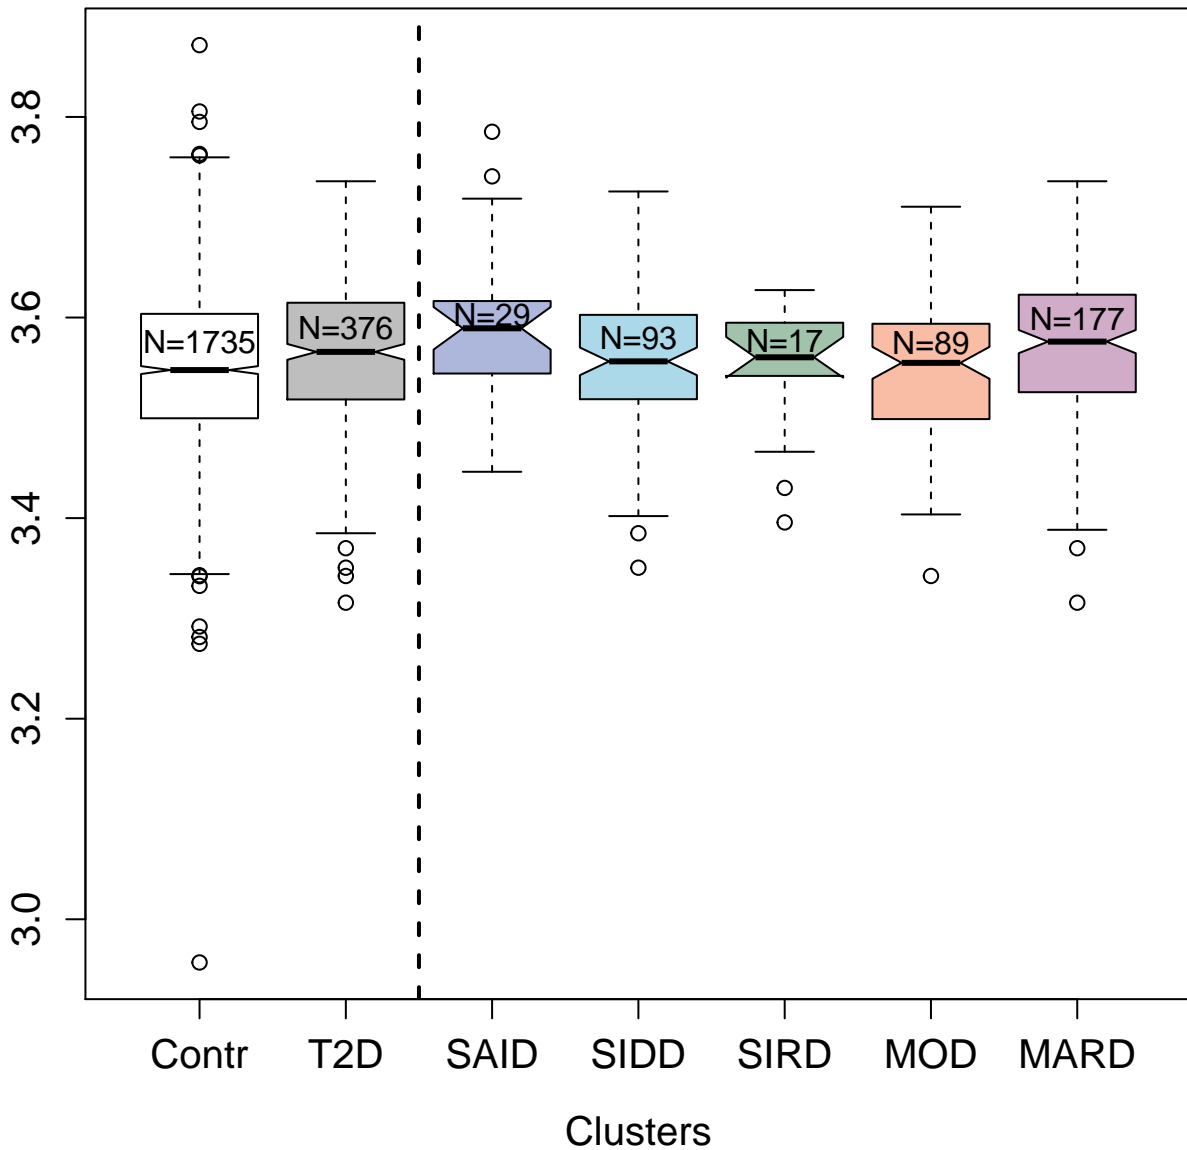

5031-10\_1 : Spectrin alpha chain;  
non-erythrocytic 1

2.5 3.0 3.5

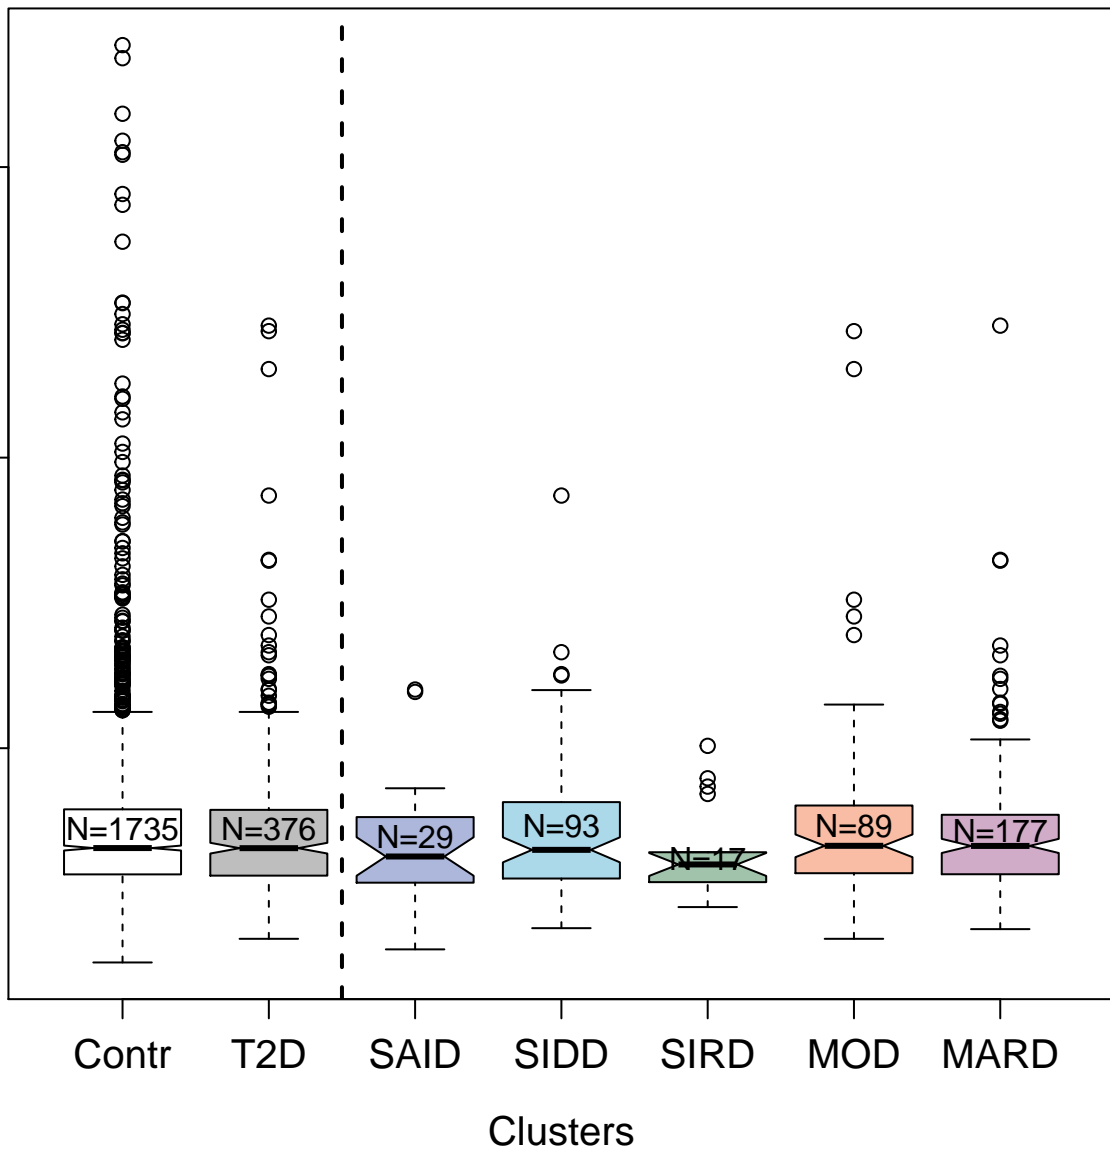

4971-1\_1 : Cathepsin Z

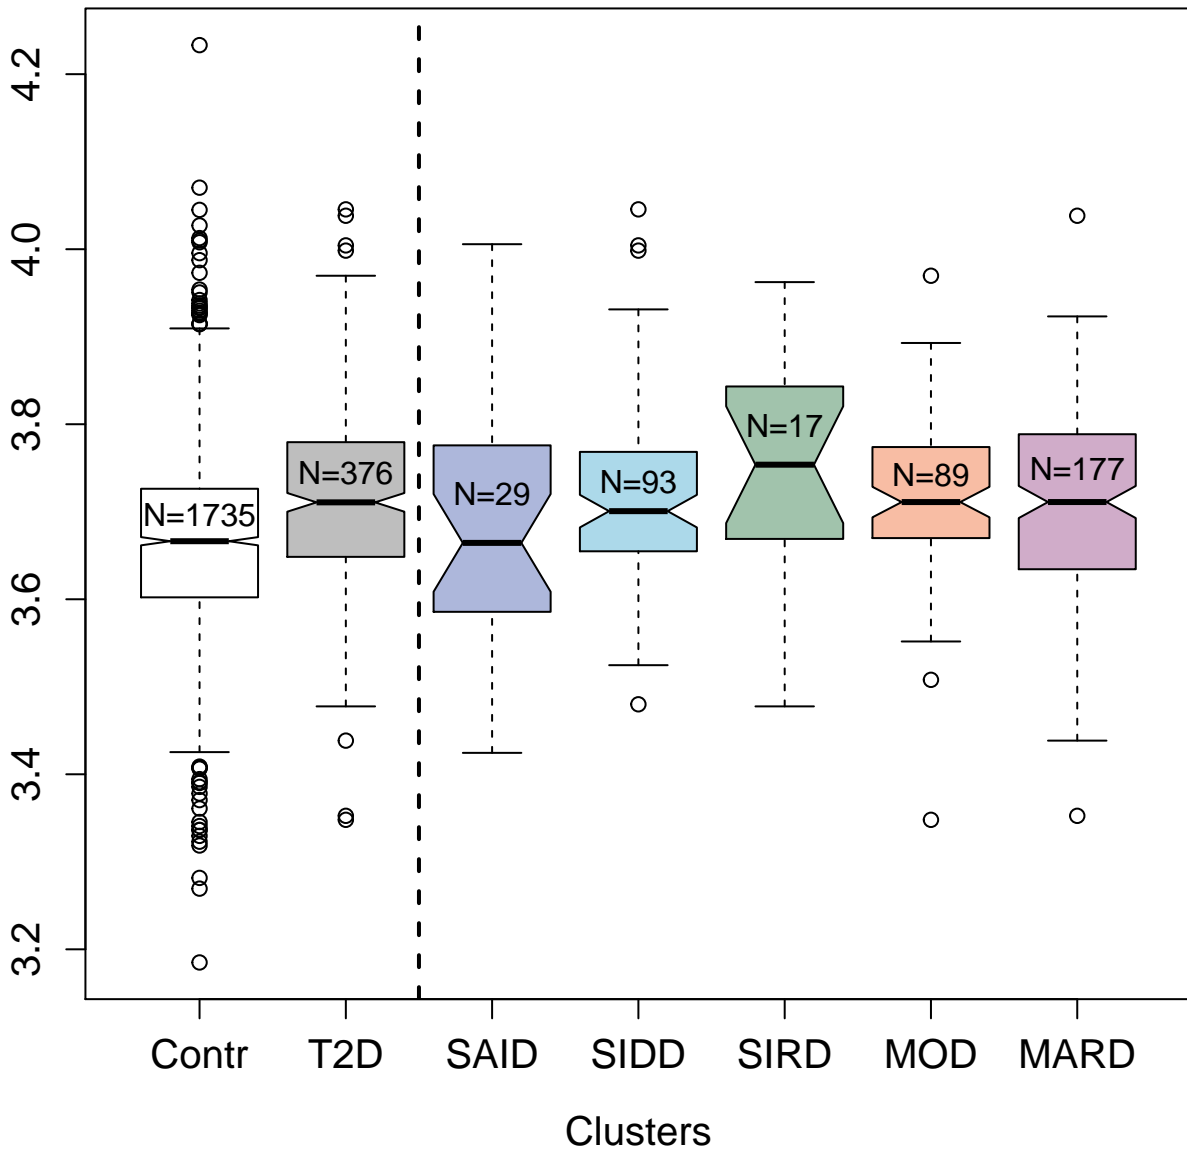

3873-51\_2 : Thyroid peroxidase

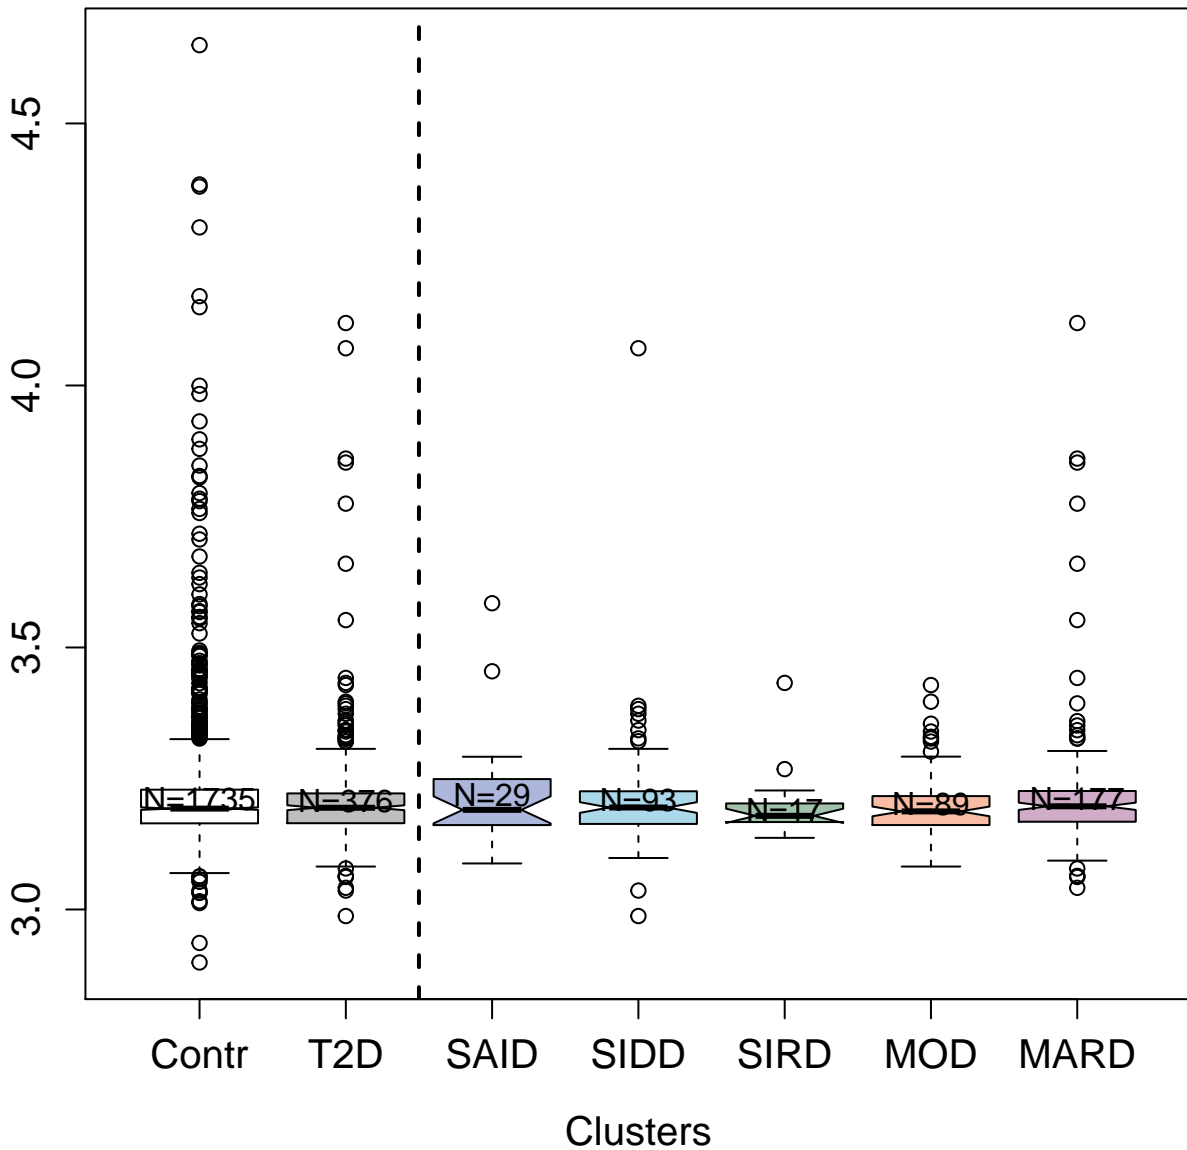

4449-67\_3 : Gremlin-1

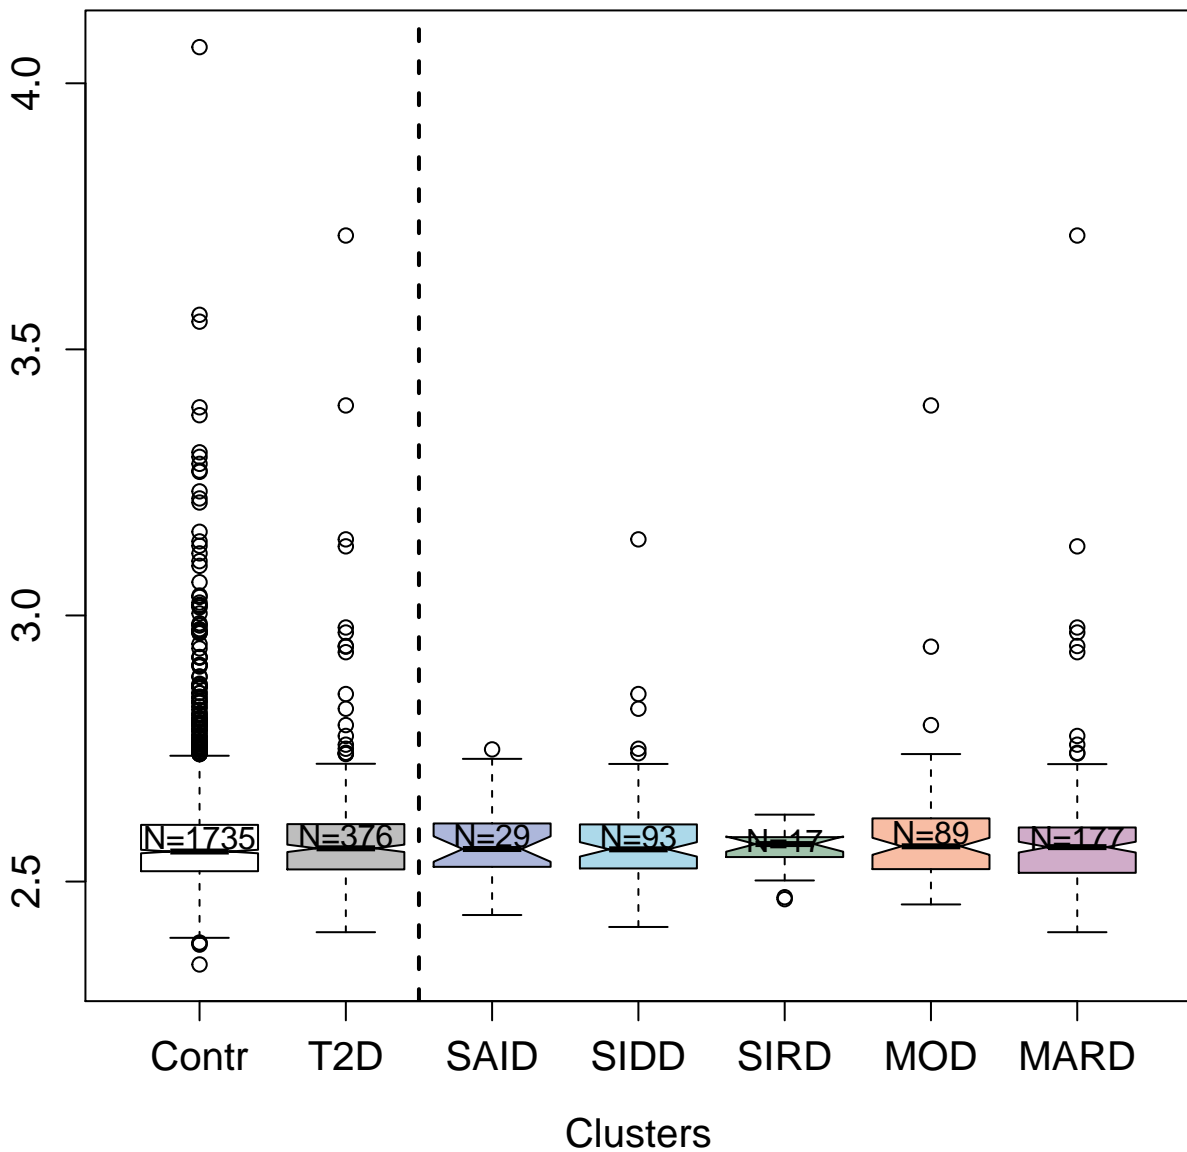

5028-59\_1 : Scavenger receptor cysteine-rich type 1 protein M130

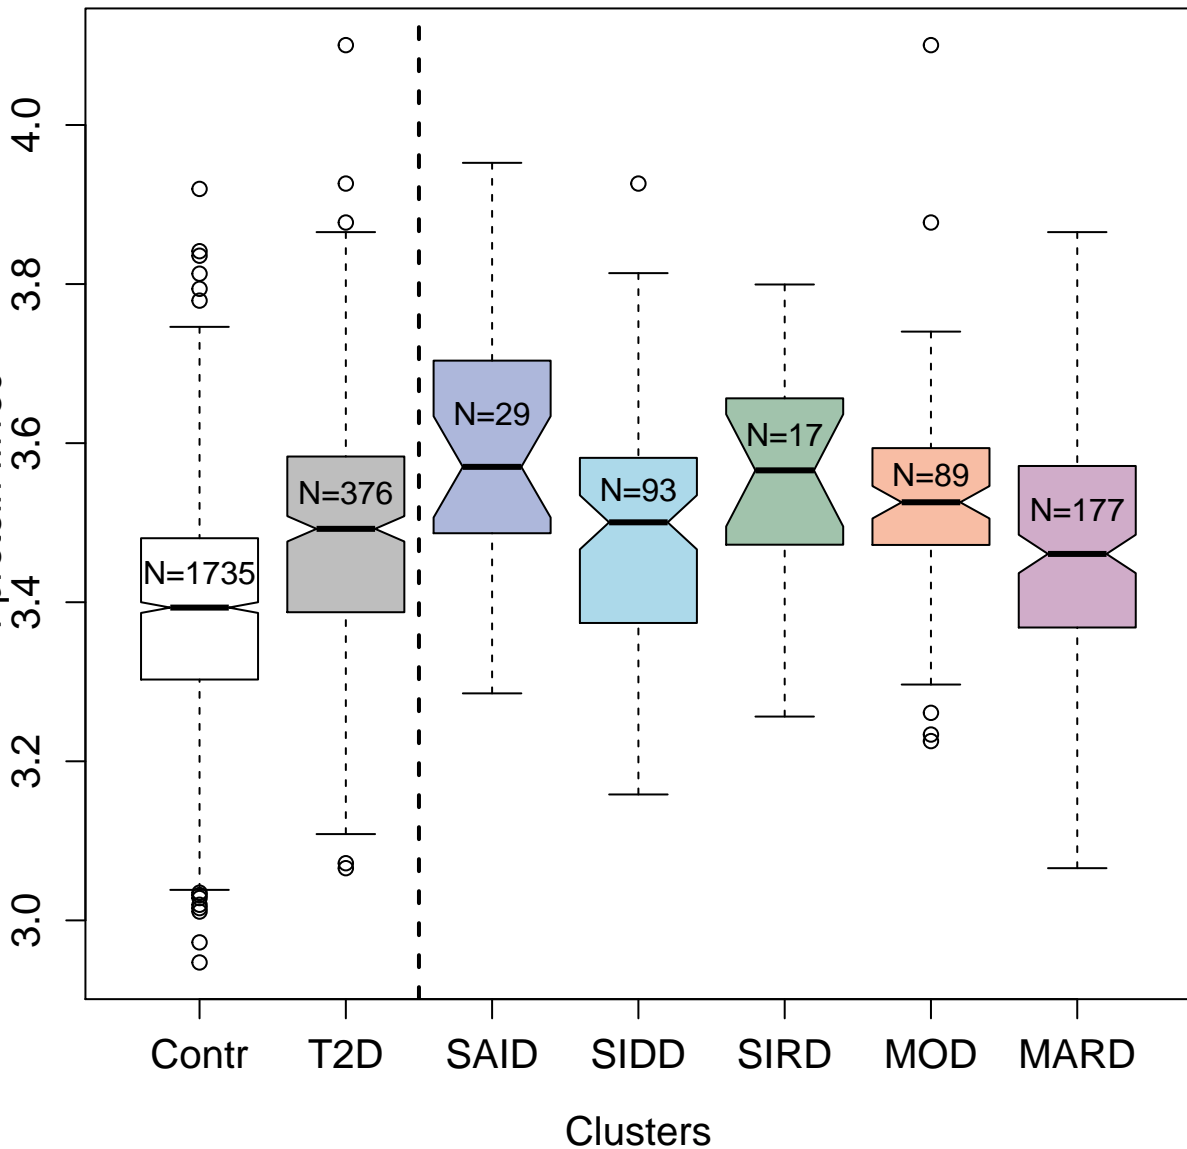

2620-4\_2 : Interleukin-6 receptor subunit beta

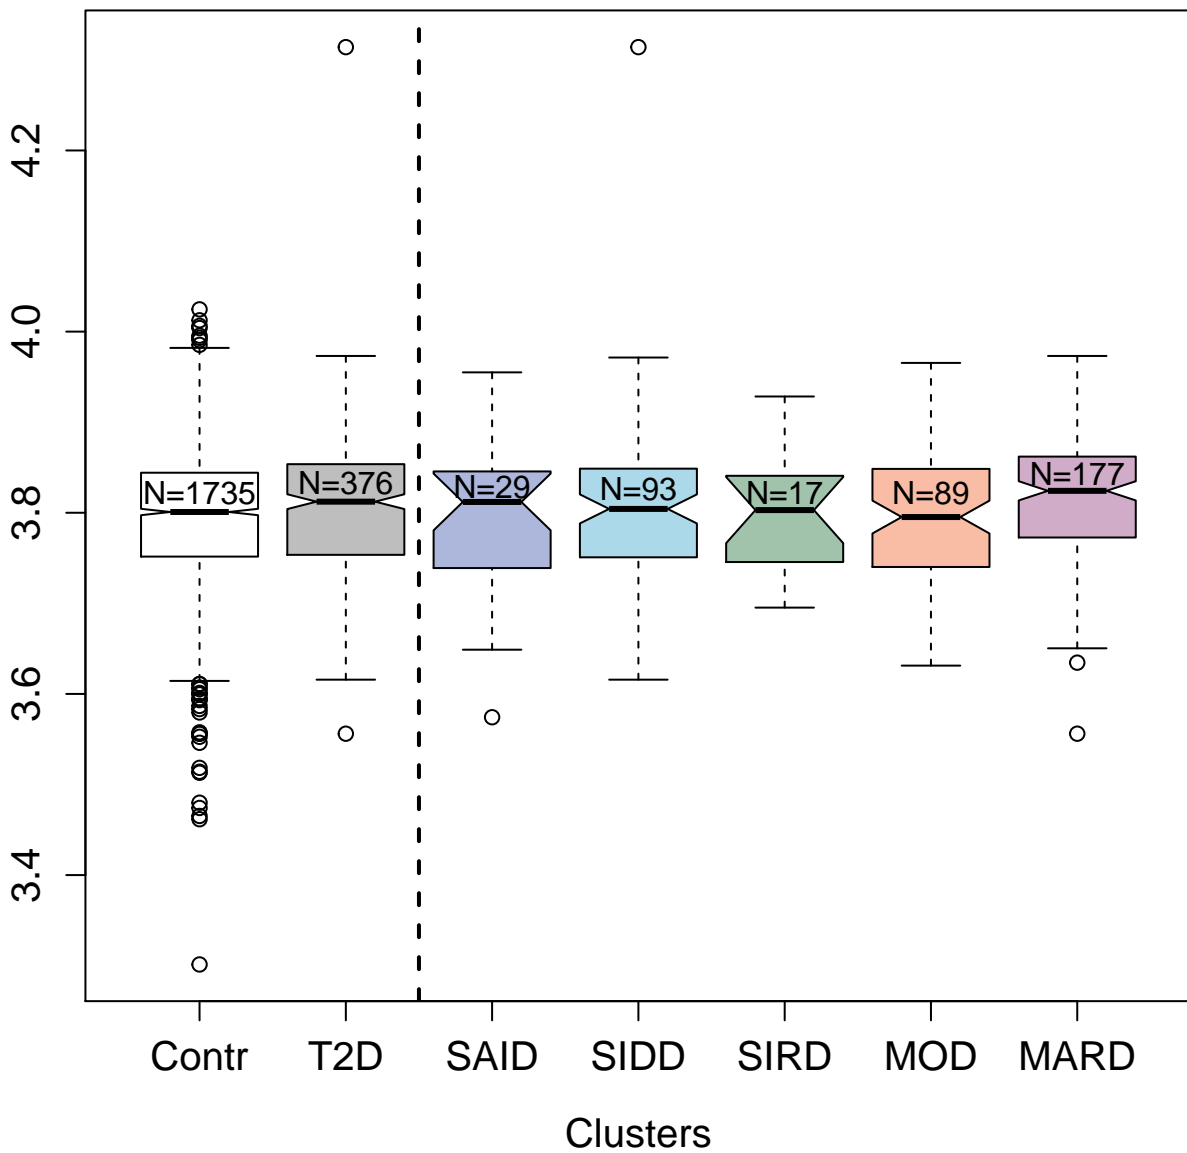

13105-7\_3 : Synaptosomal-associated protein 25

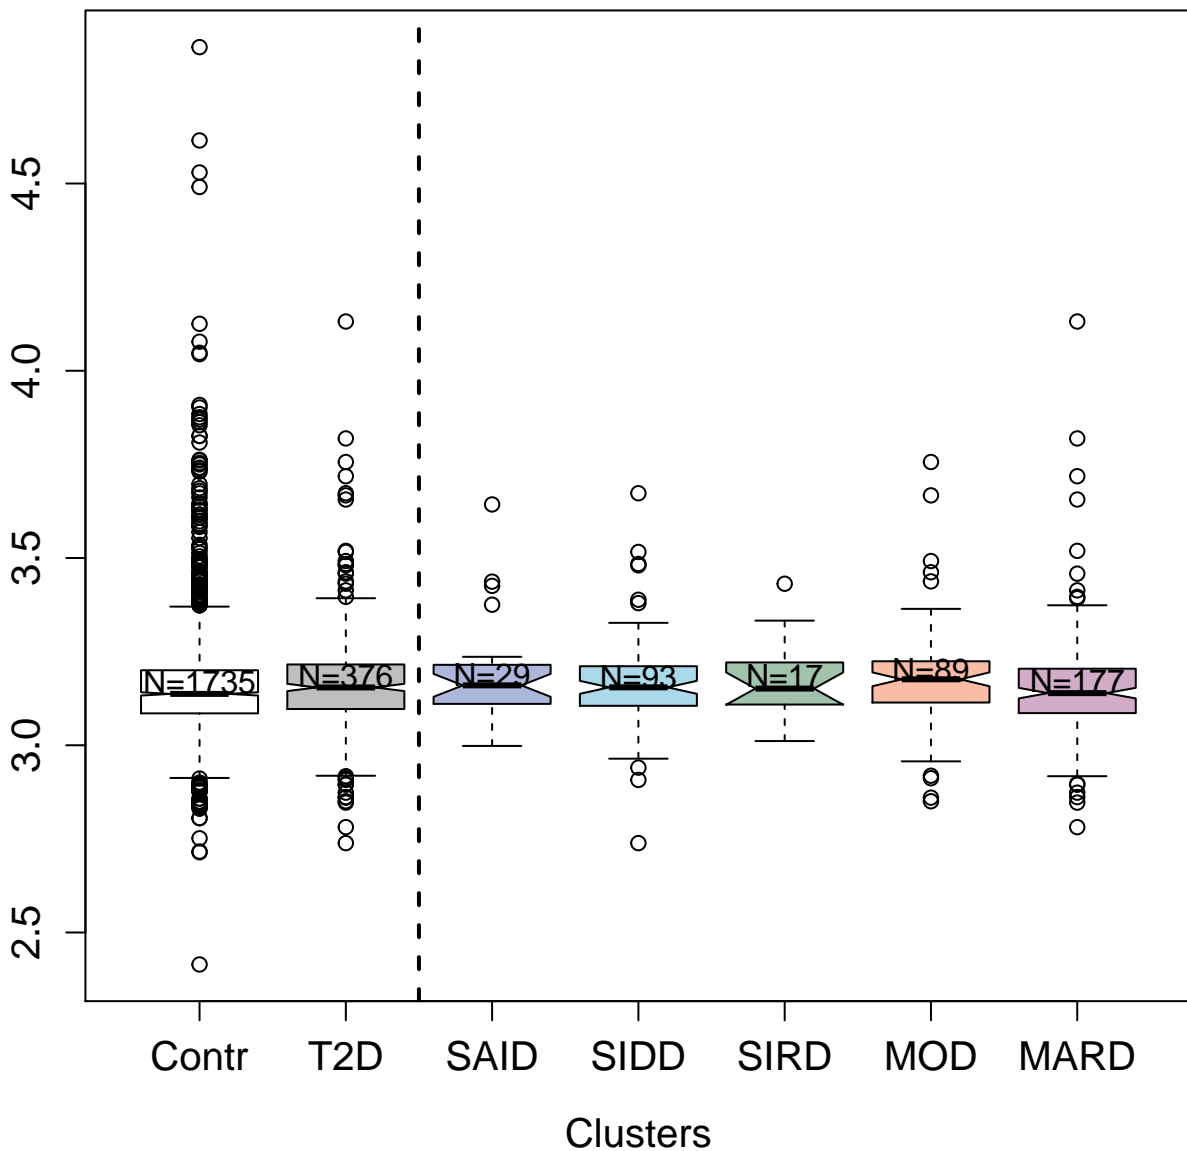



3360-50\_4 : Serine/threonine-protein kinase Chk2

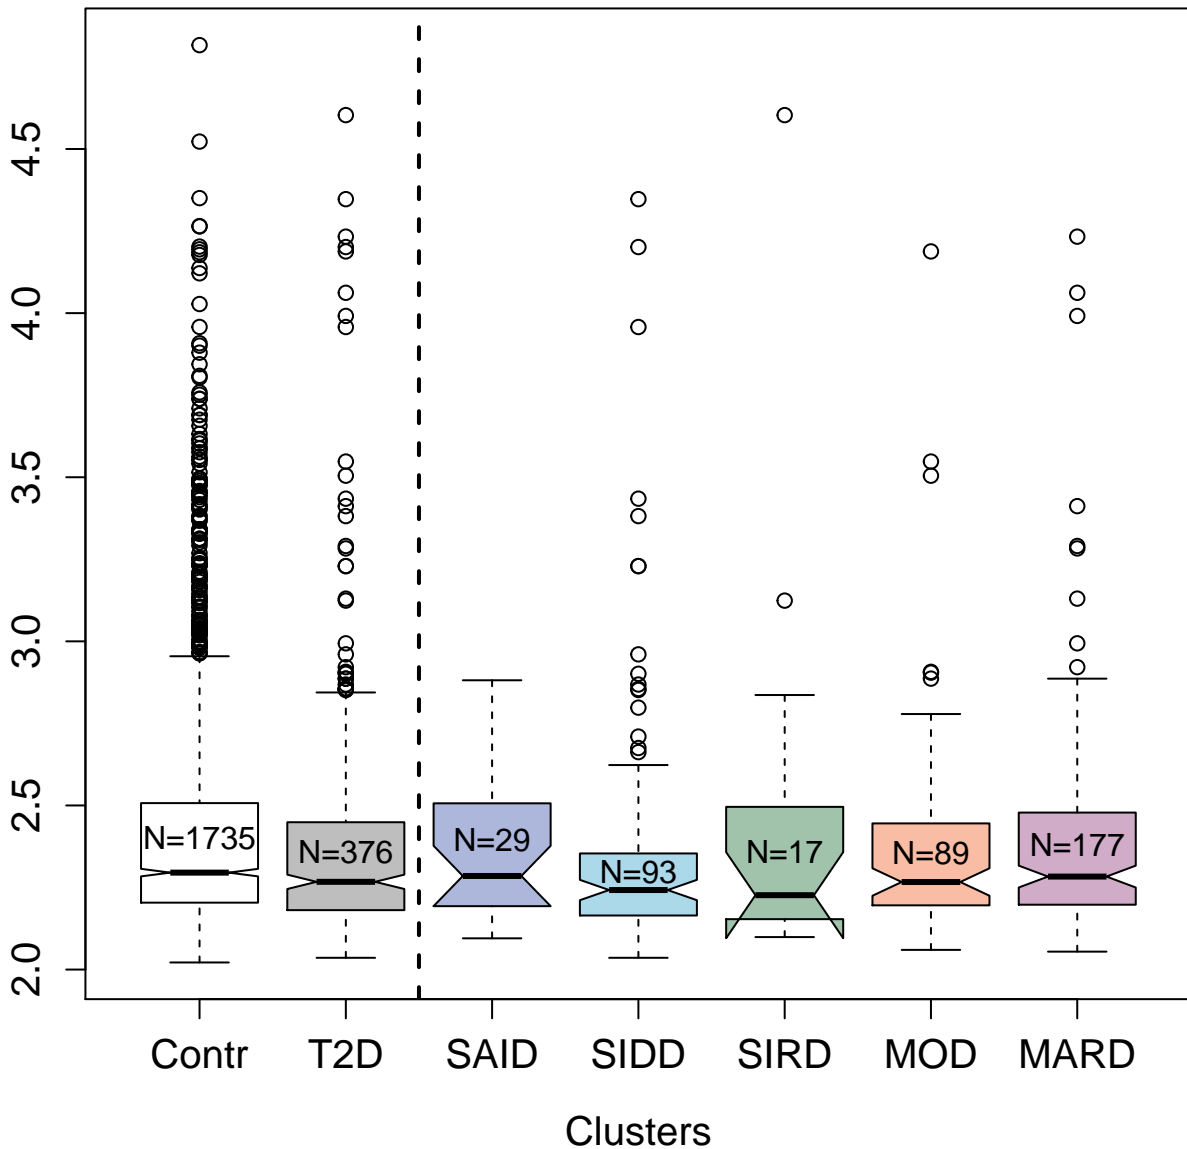

5138-50\_3 : Tumor necrosis factor receptor  
superfamily member 12A

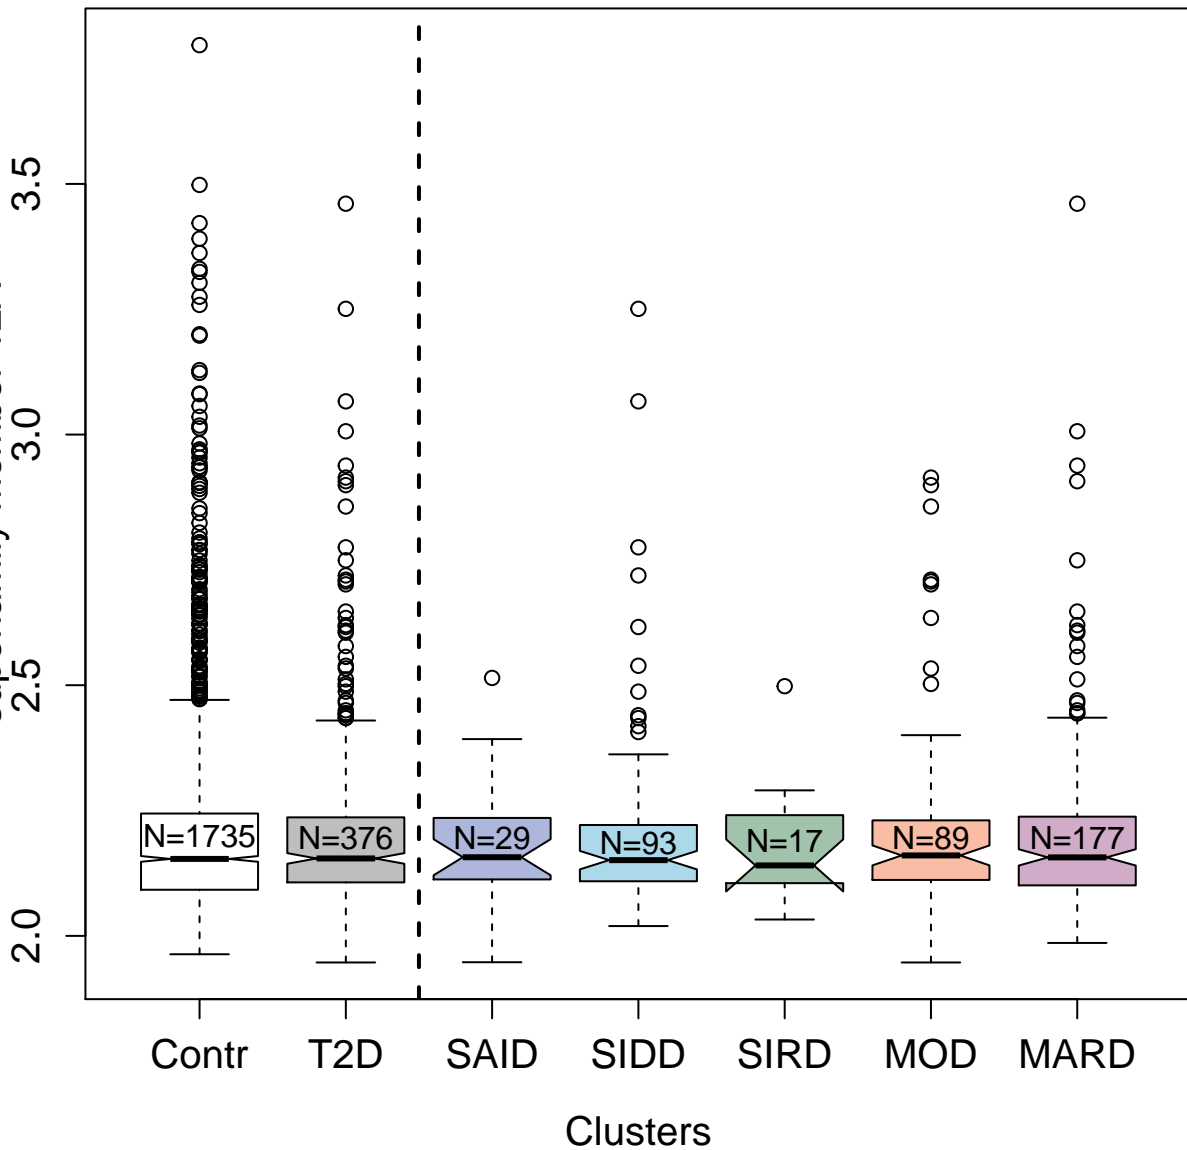

3189-61\_2 : Enteropeptidase

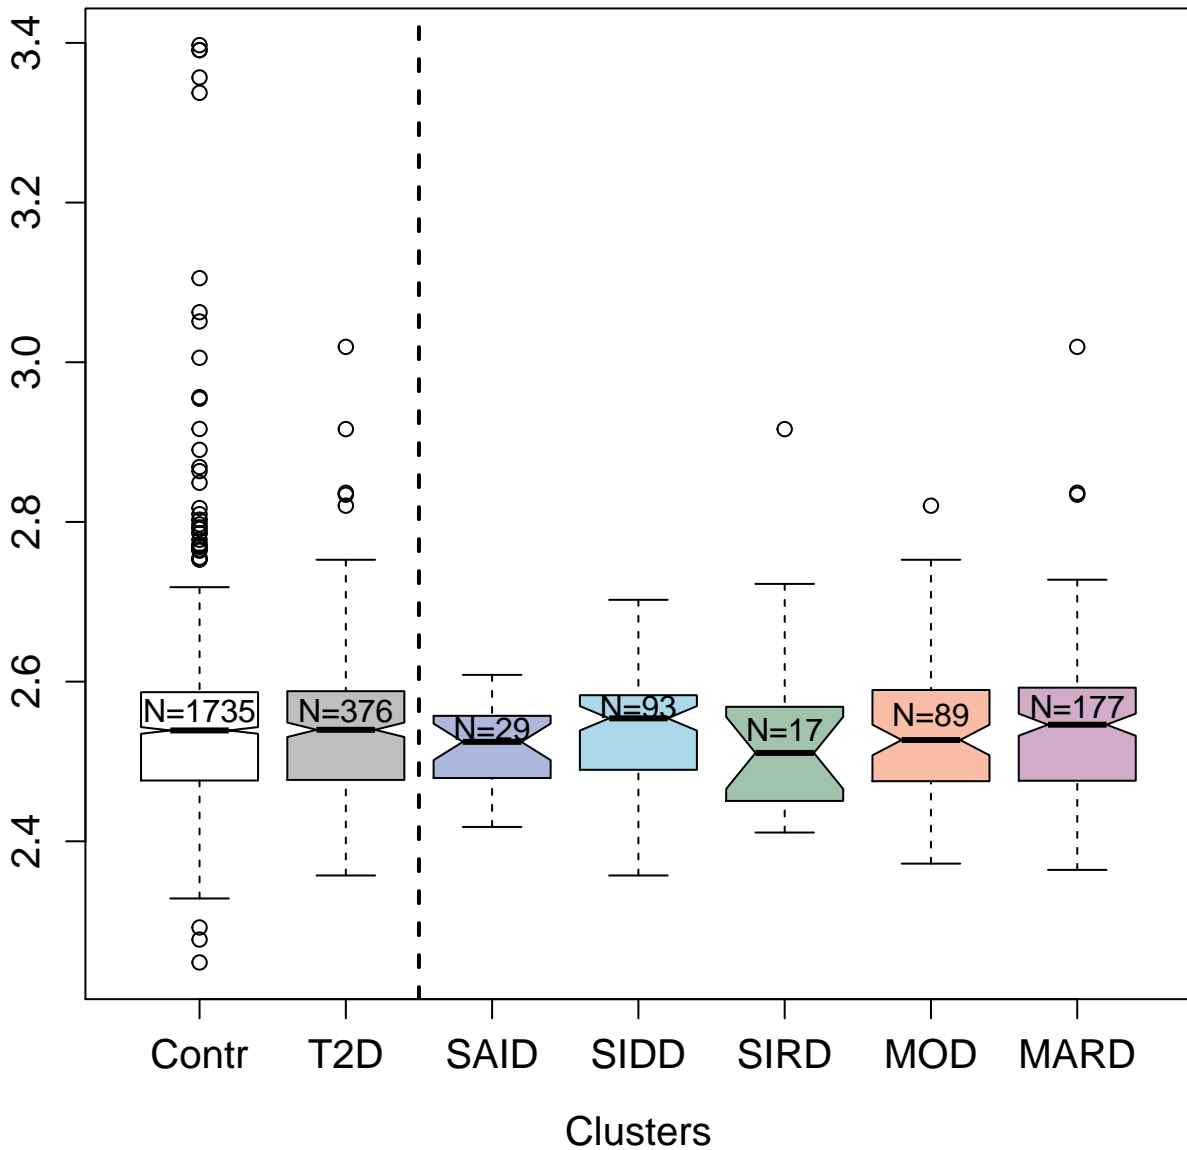

3309-2\_2 : Low affinity immunoglobulin gamma Fc region receptor II-a

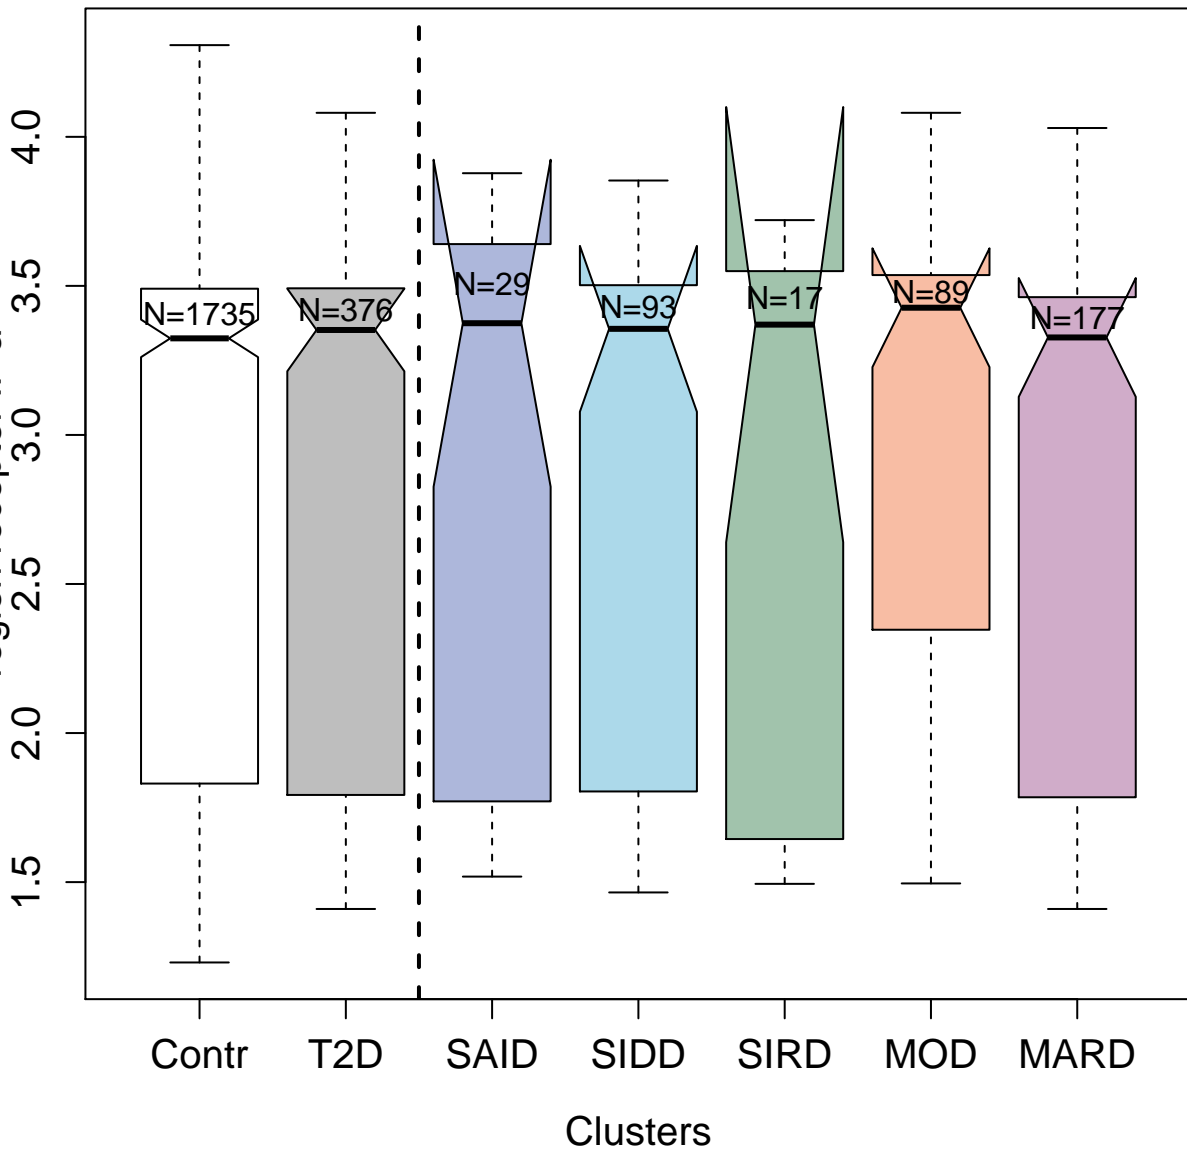

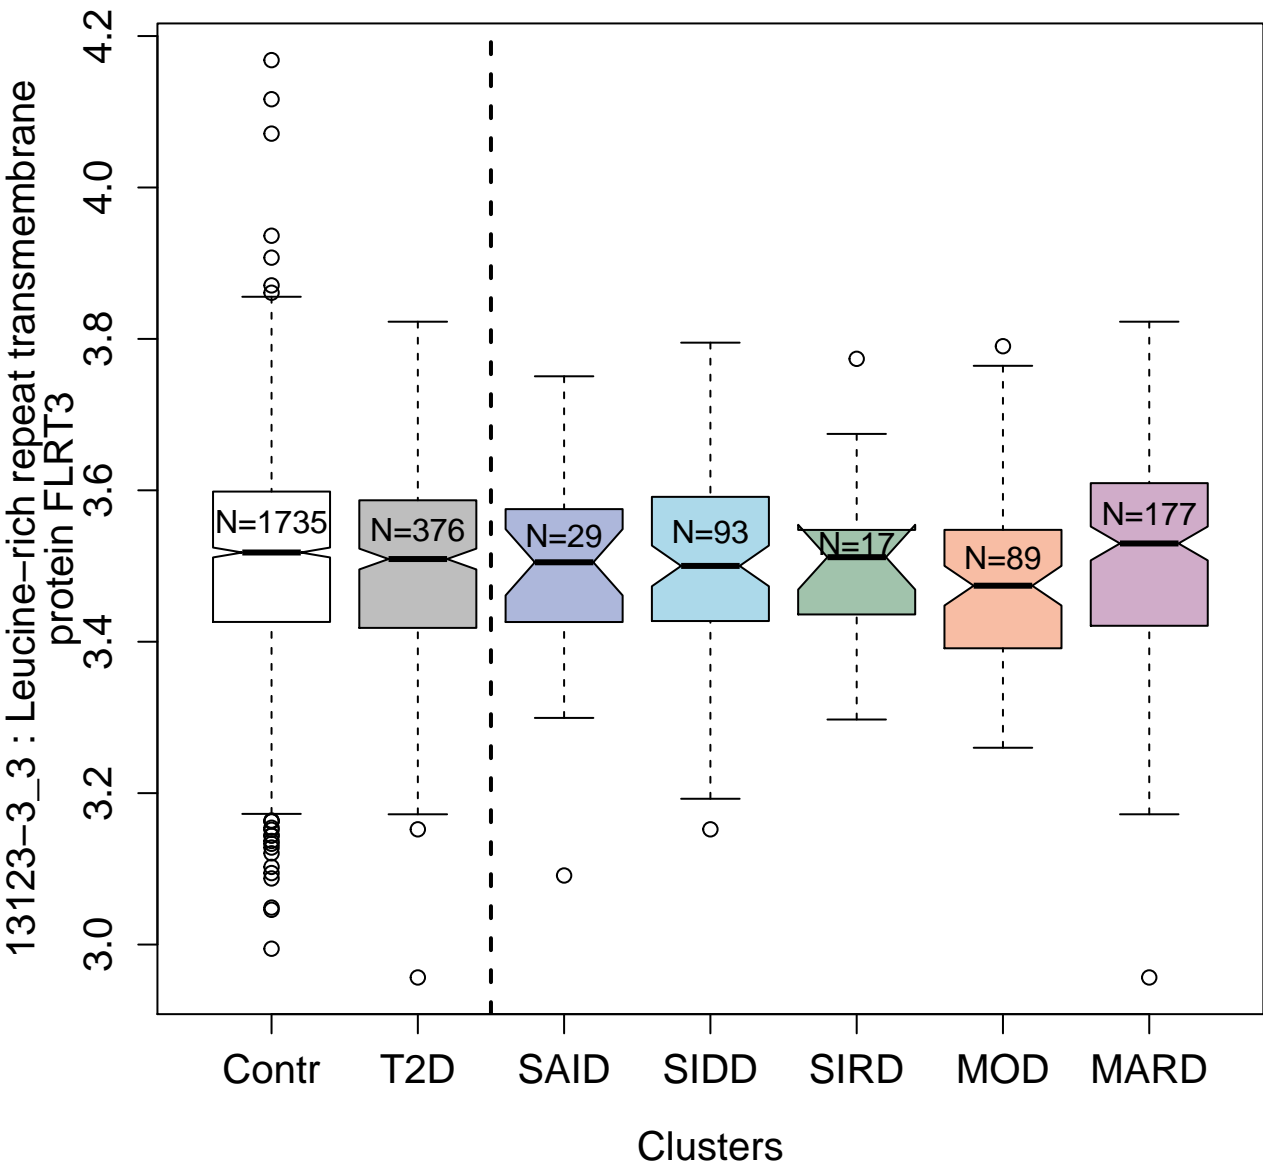

4464-10\_2 : Sialoadhesin

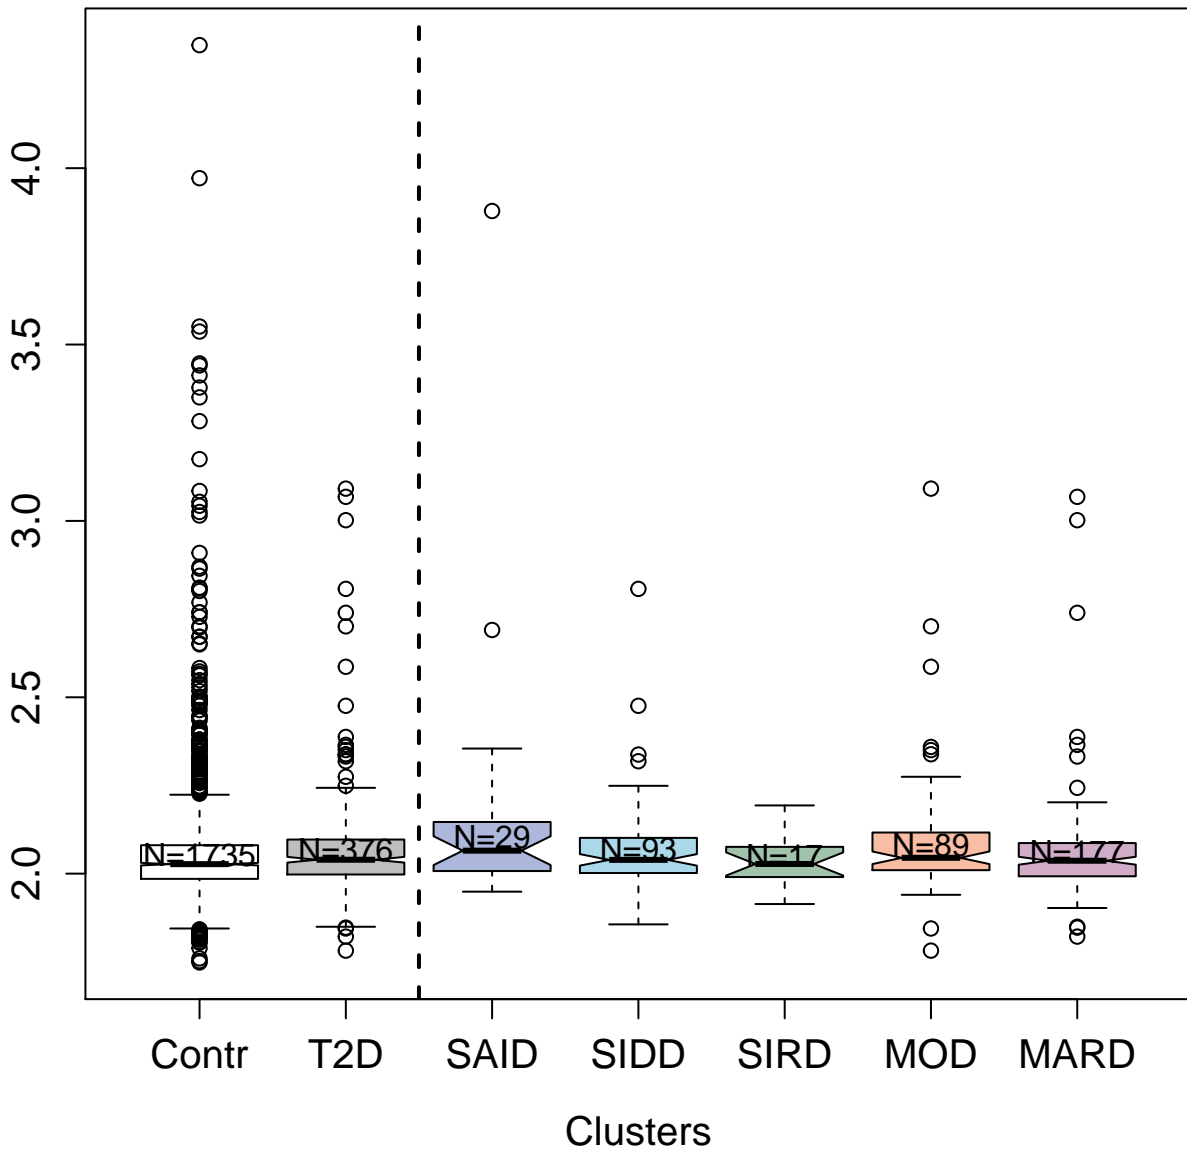

3151-6\_1 : Interleukin-2 receptor subunit alpha

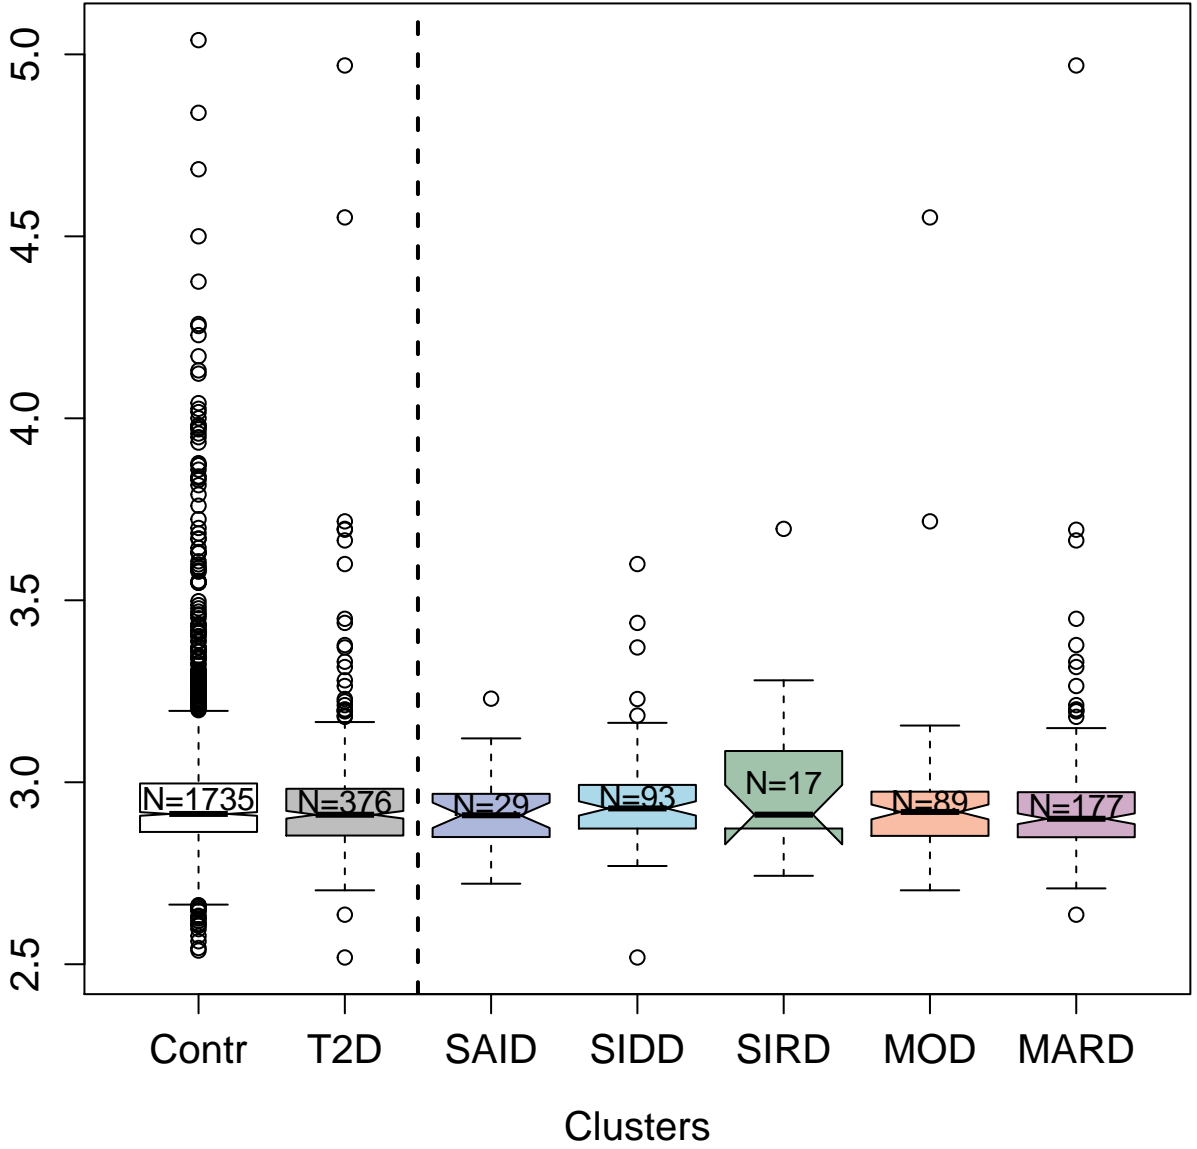

3400-49\_2 : Serine/threonine-protein kinase TBK1

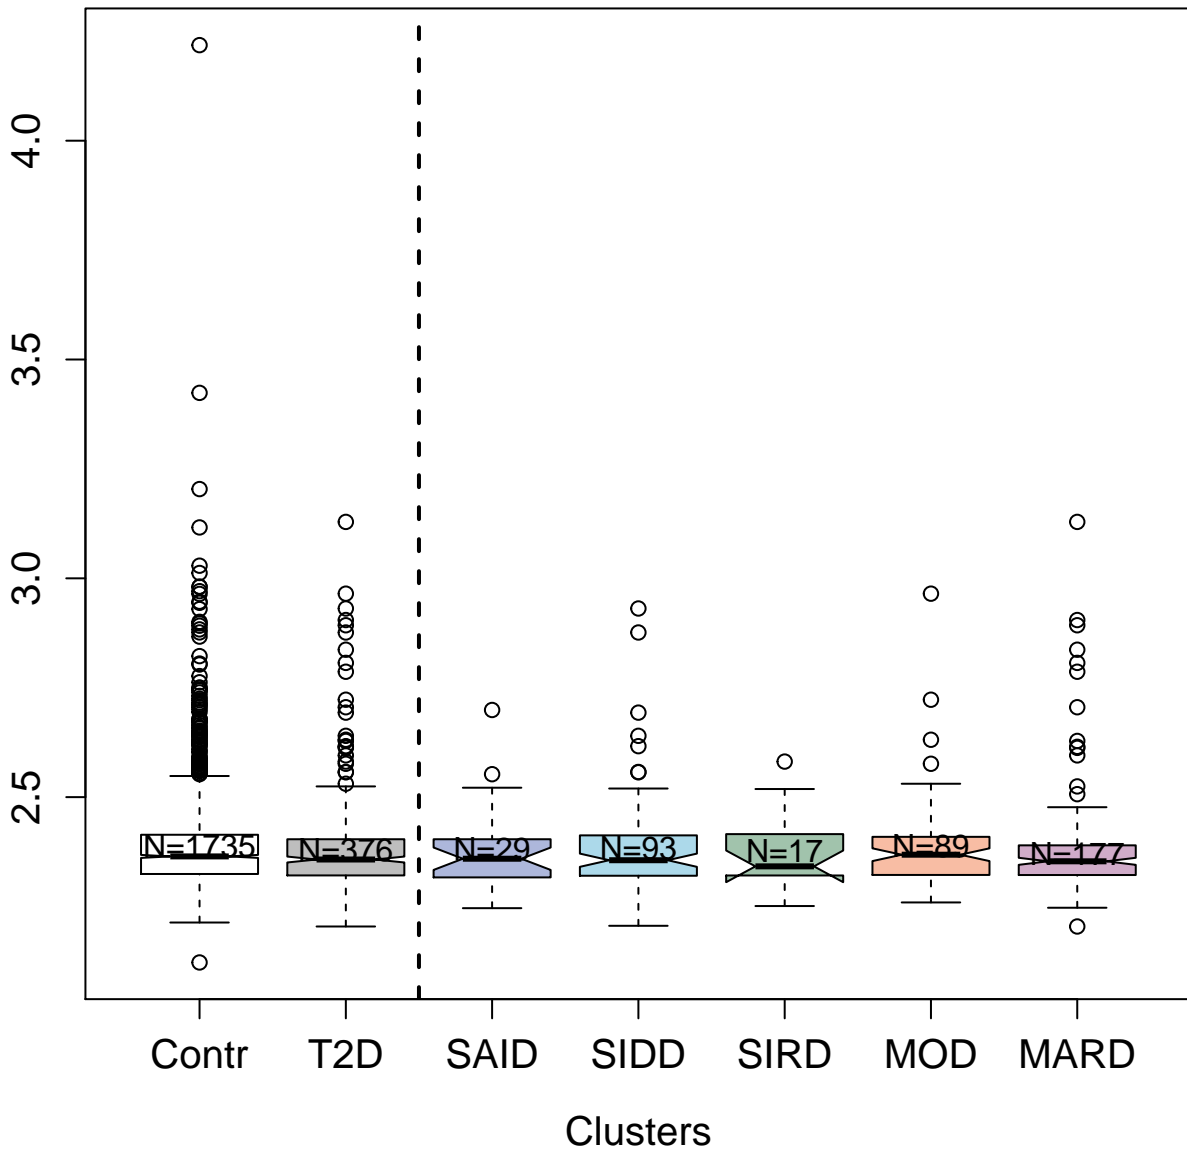



13119-26\_3 : Protein Z-dependent protease inhibitor

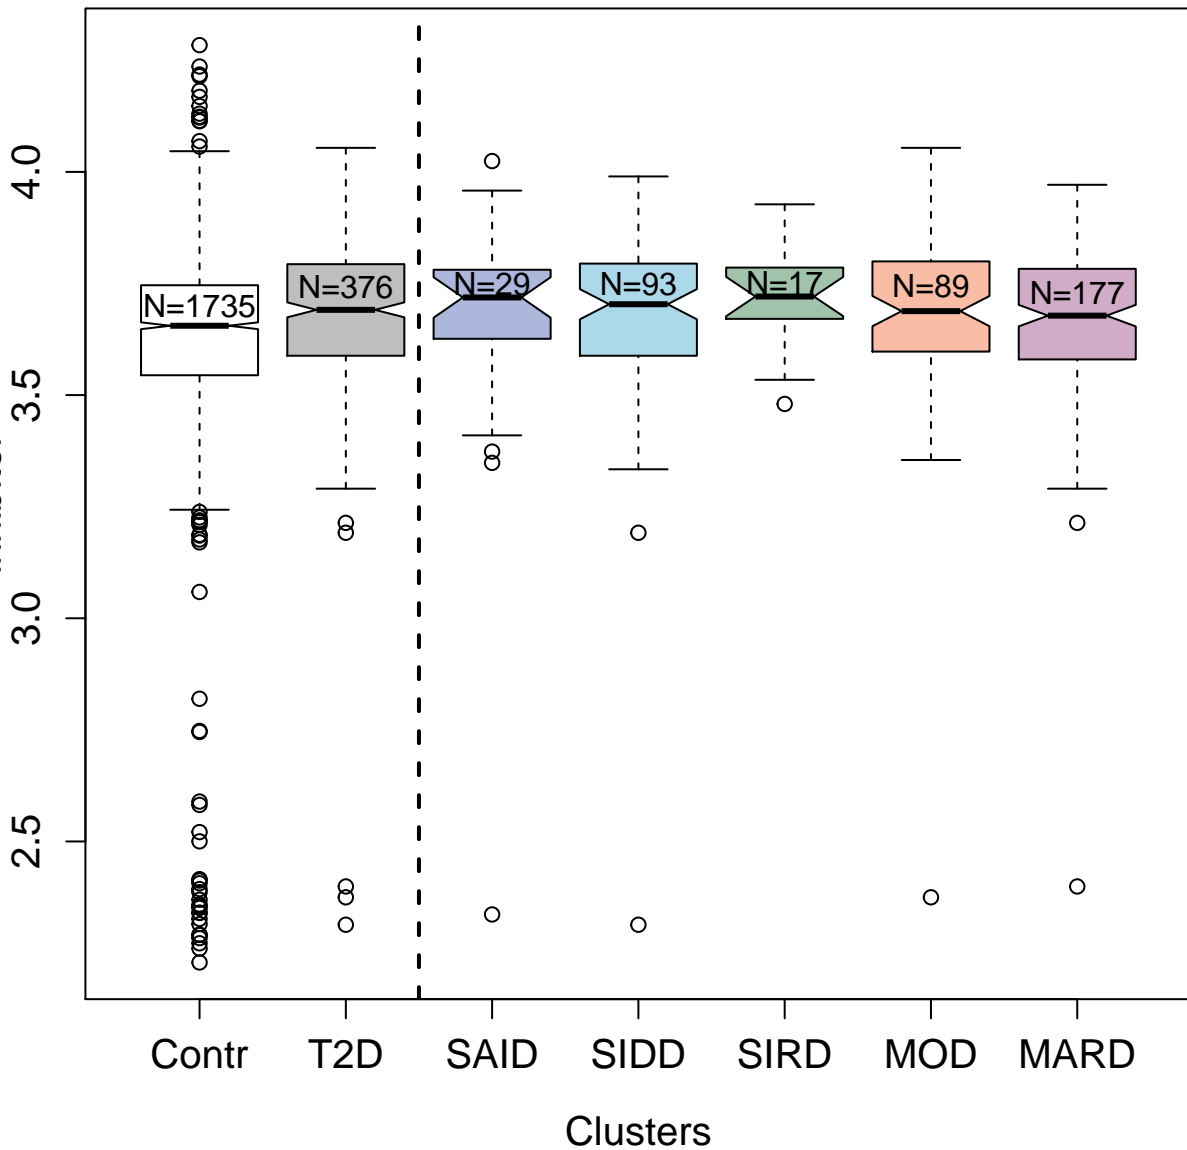

5004-69\_1 : Mitogen-activated protein kinase 11

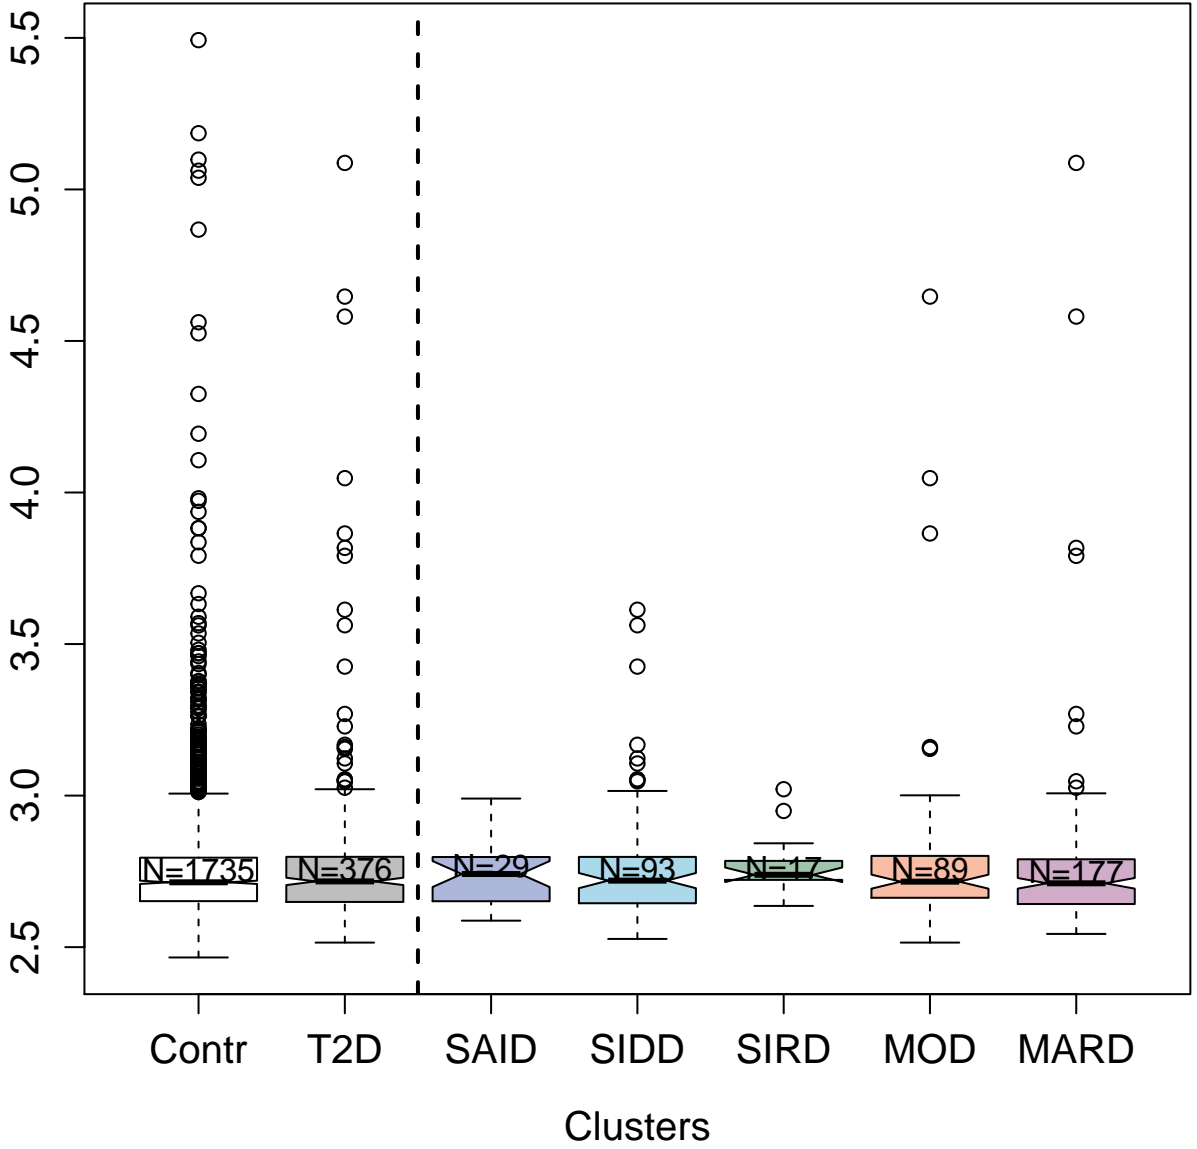

2988-57\_2 : Inducible T-cell costimulator

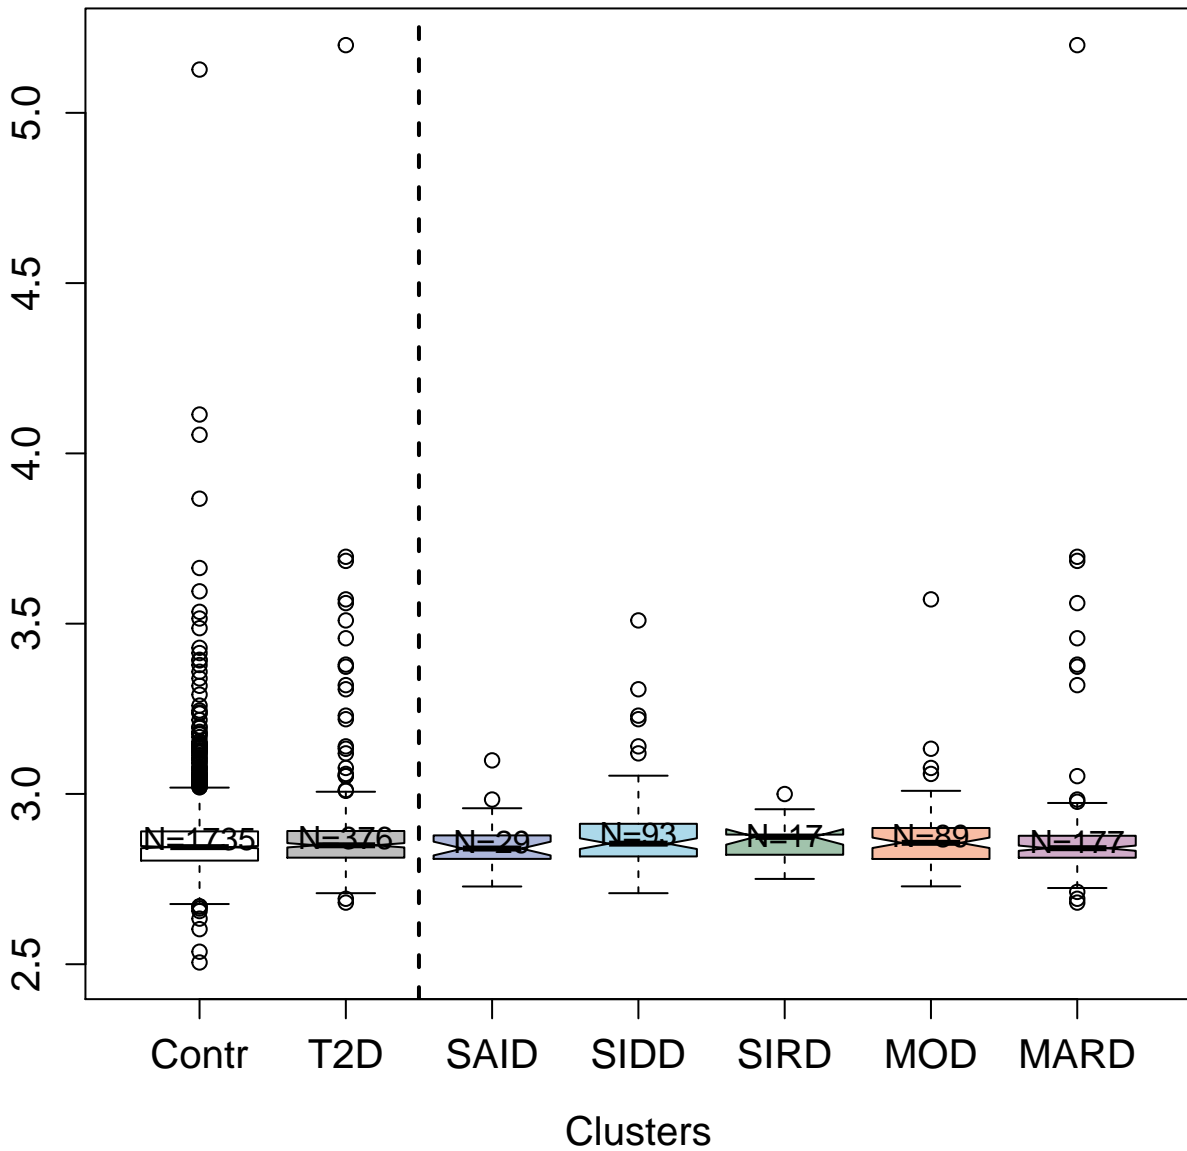

2622-18\_1 : Heme oxygenase 2

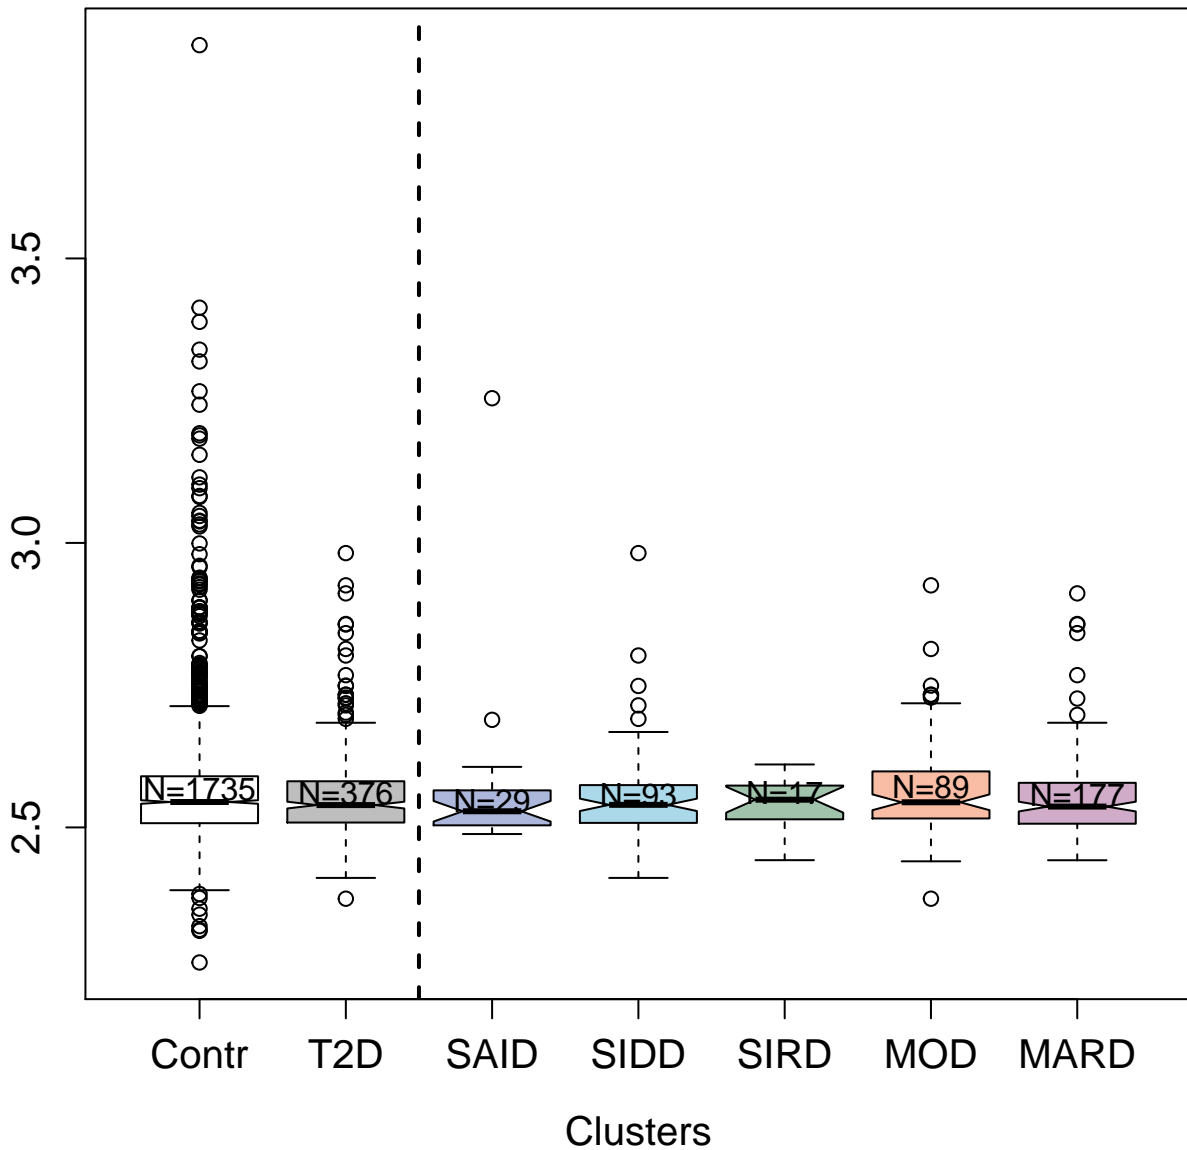

3329-14\_2 : Peptidoglycan recognition protein 1

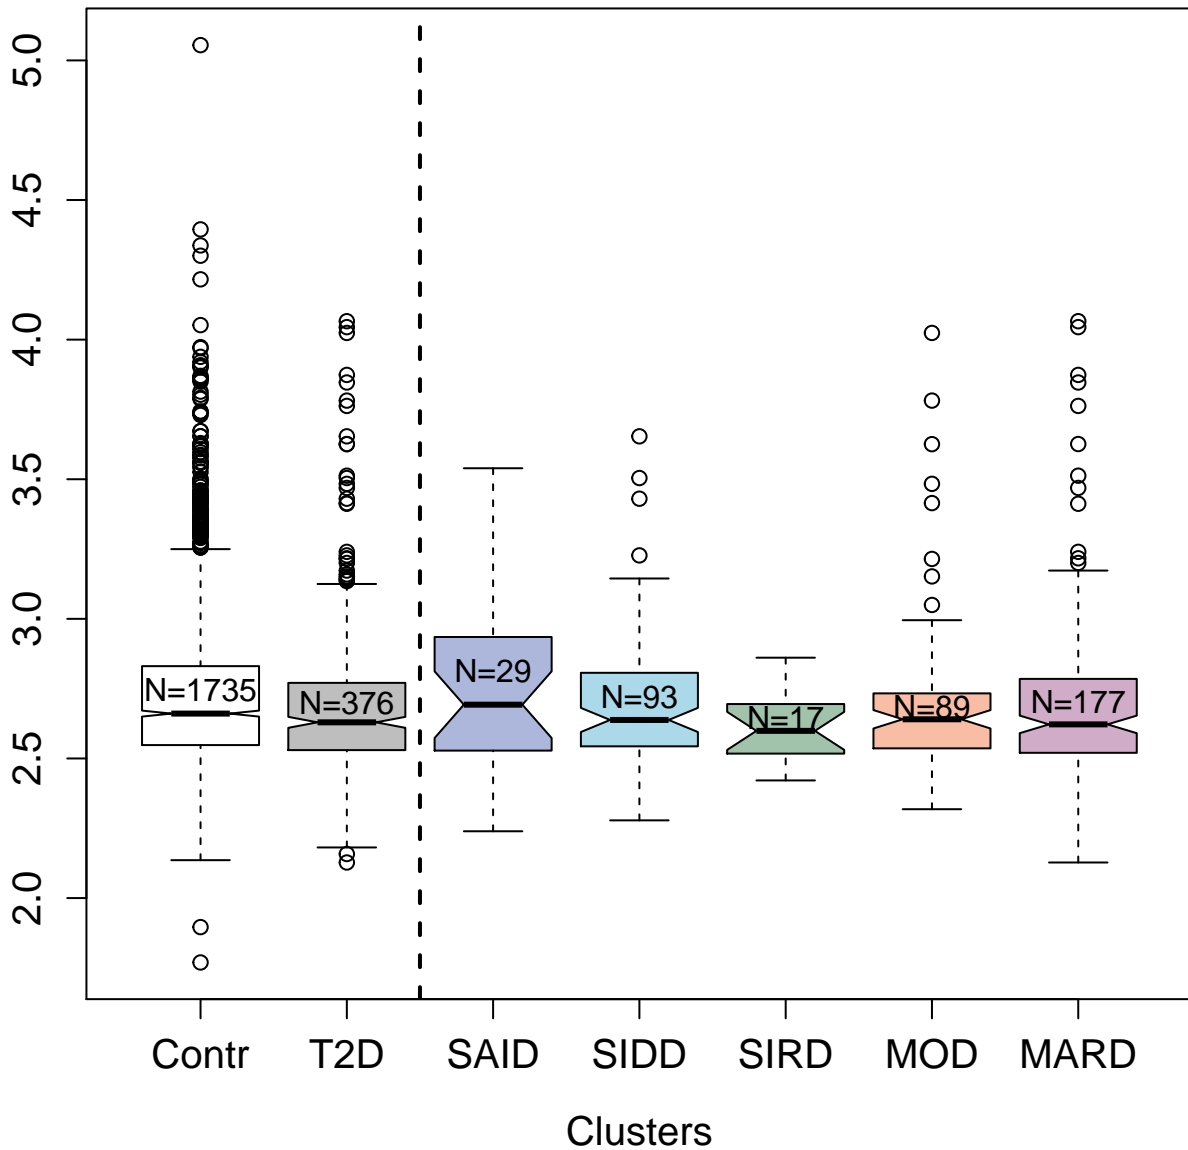

3807-1\_2 : Fibroblast growth factor 23

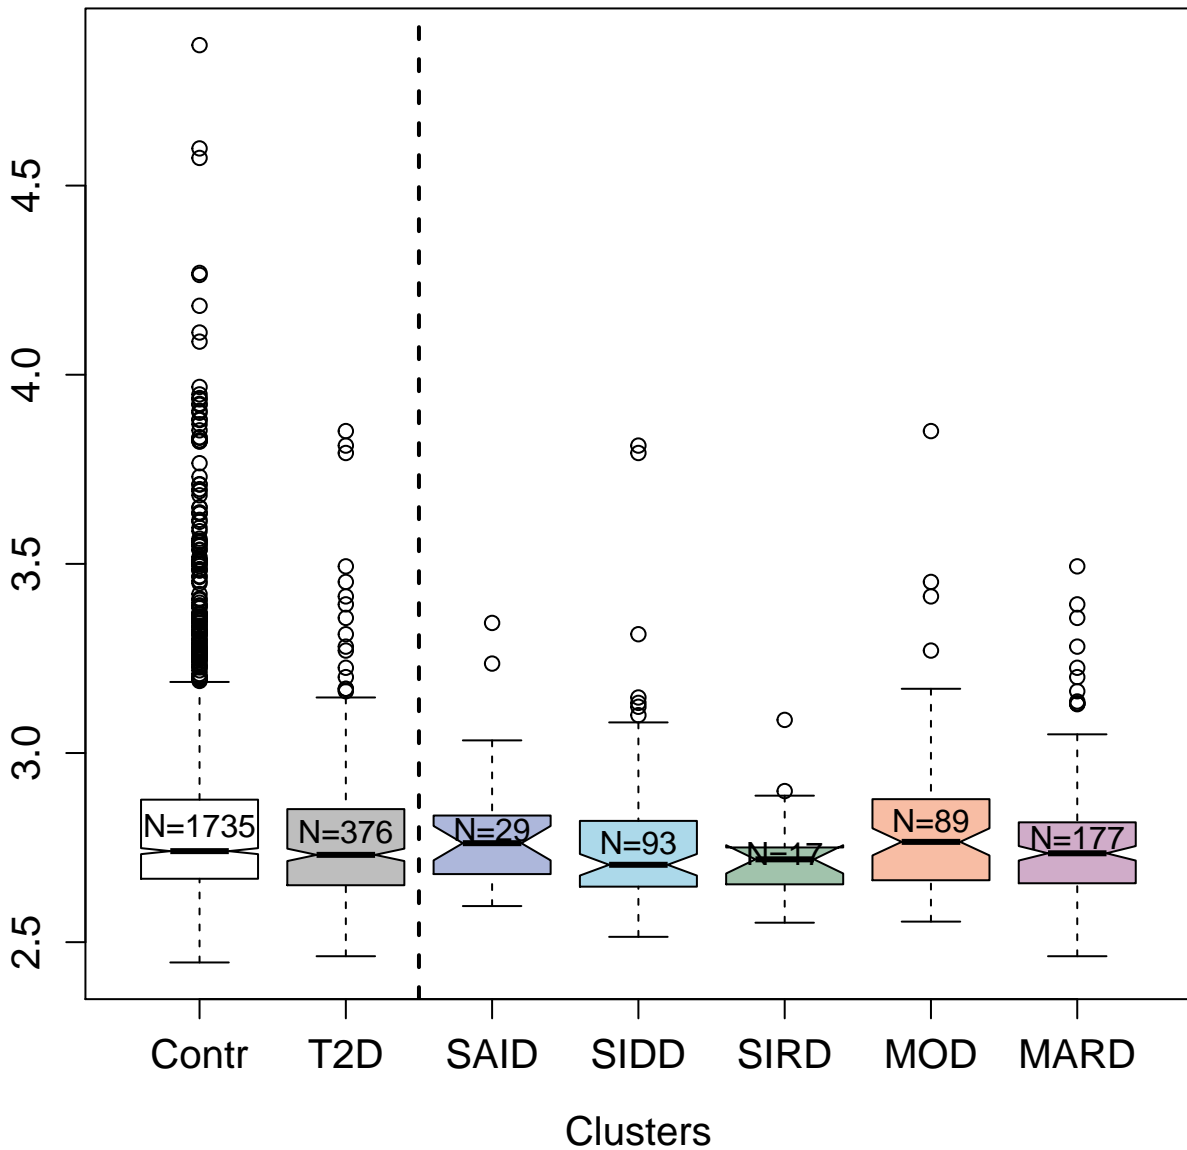

4140-3\_2 : Interleukin-7

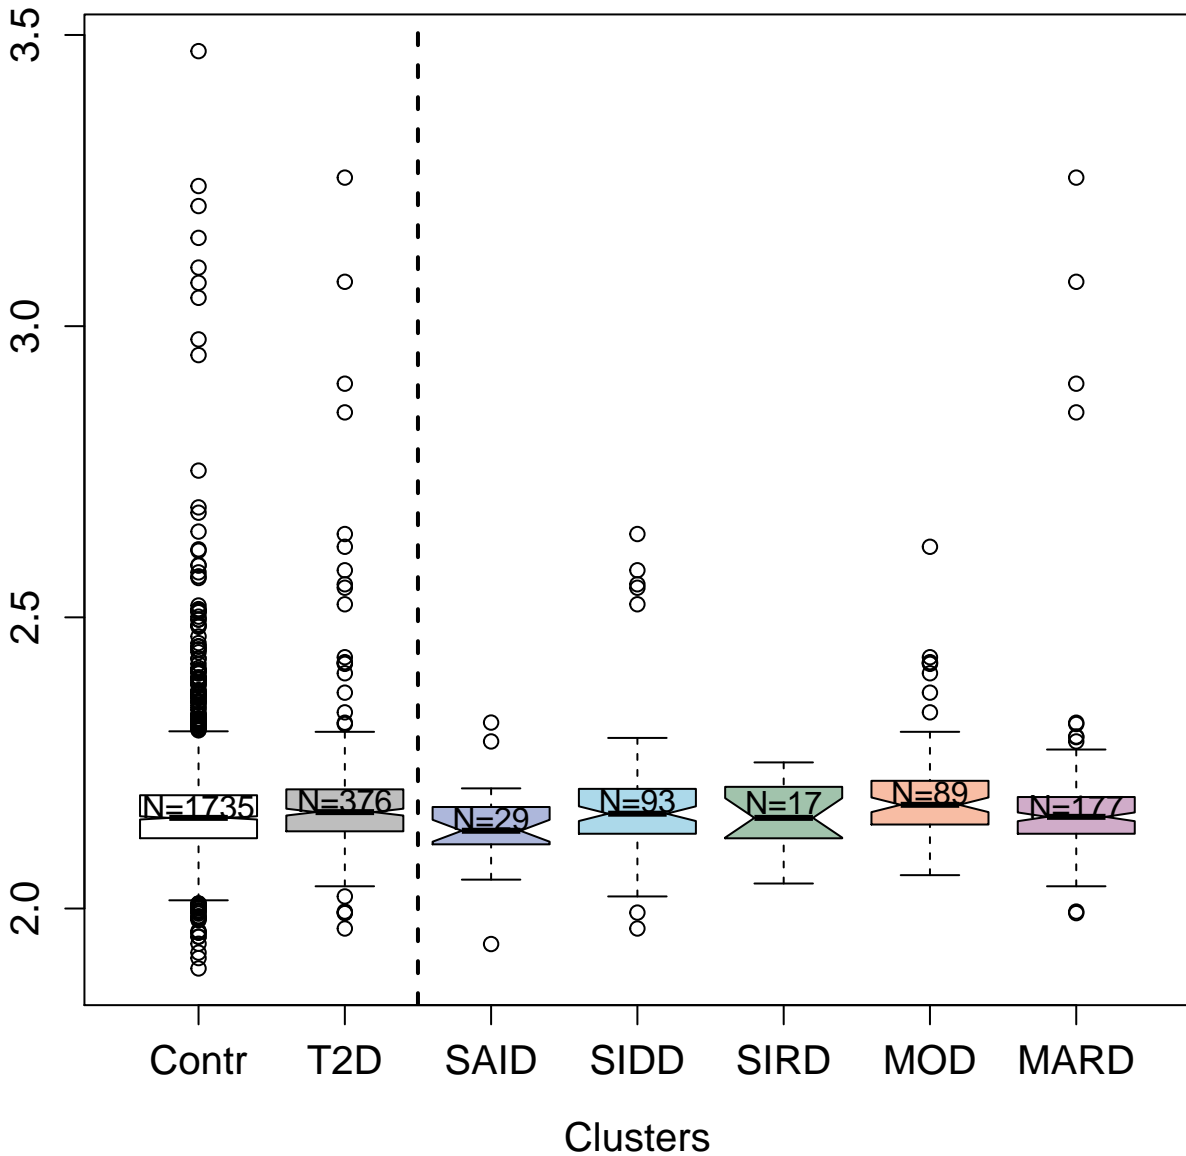

3200-49\_2 : Kallikrein-13

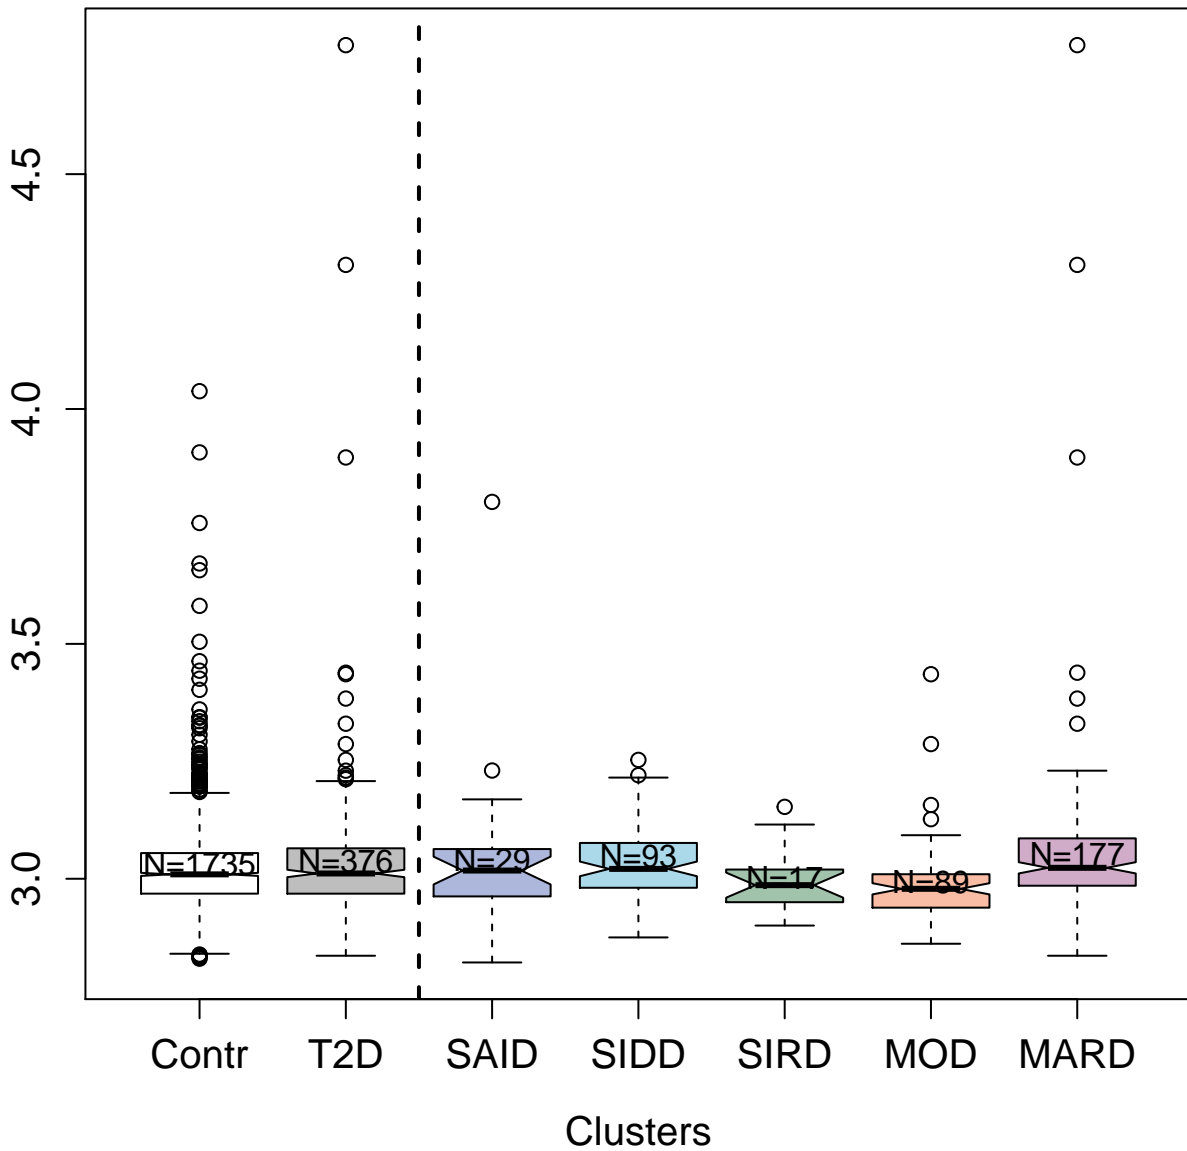



4123-60\_2 : Fibroblast growth factor 4

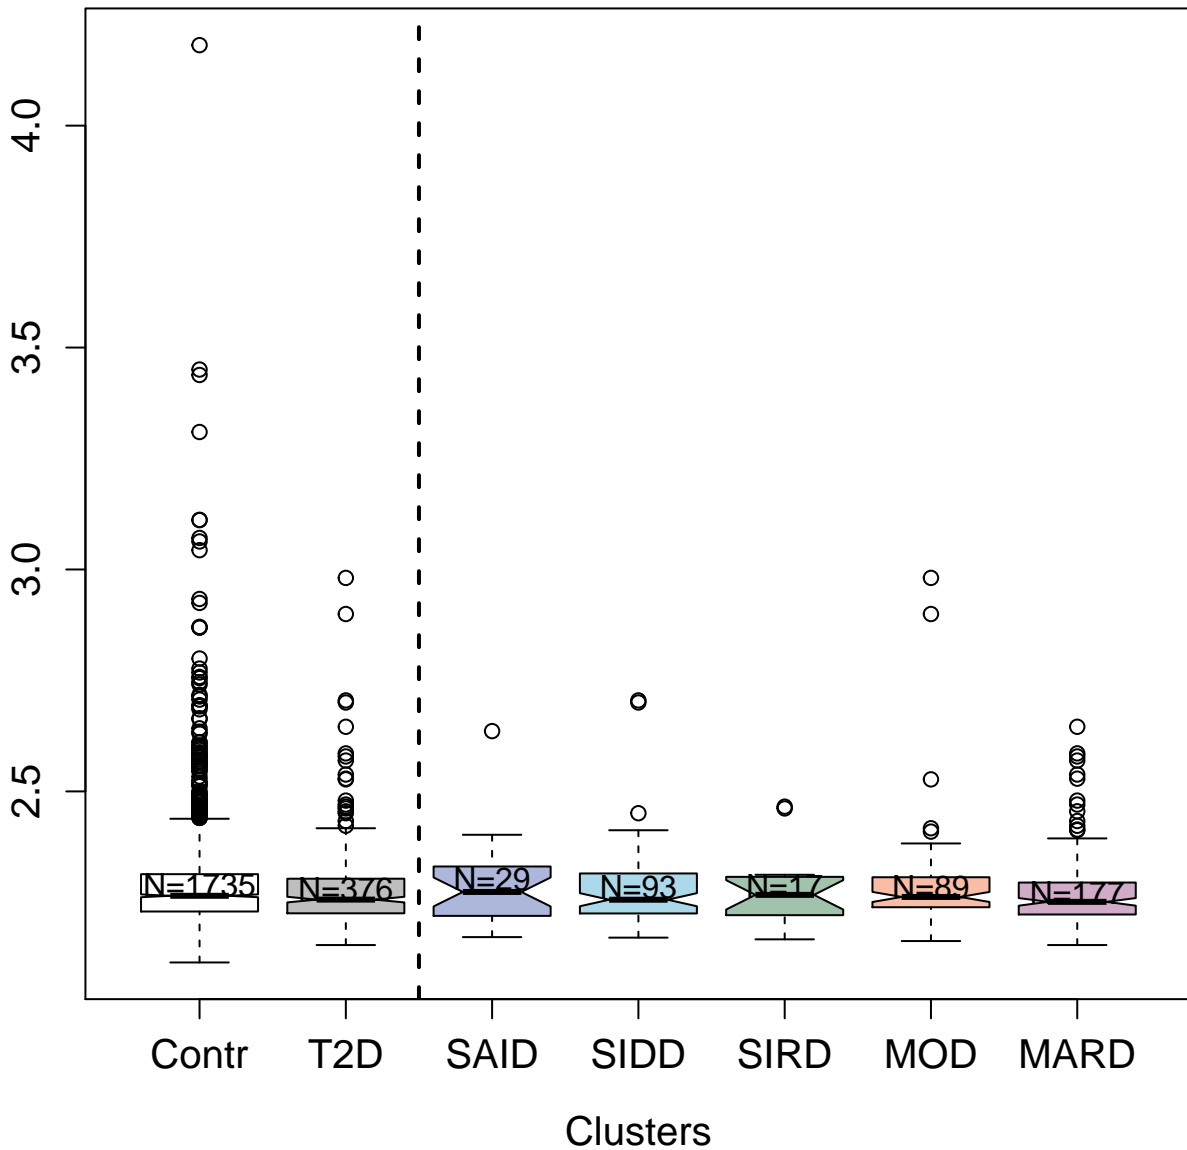

3181-50\_2 : Cathepsin S

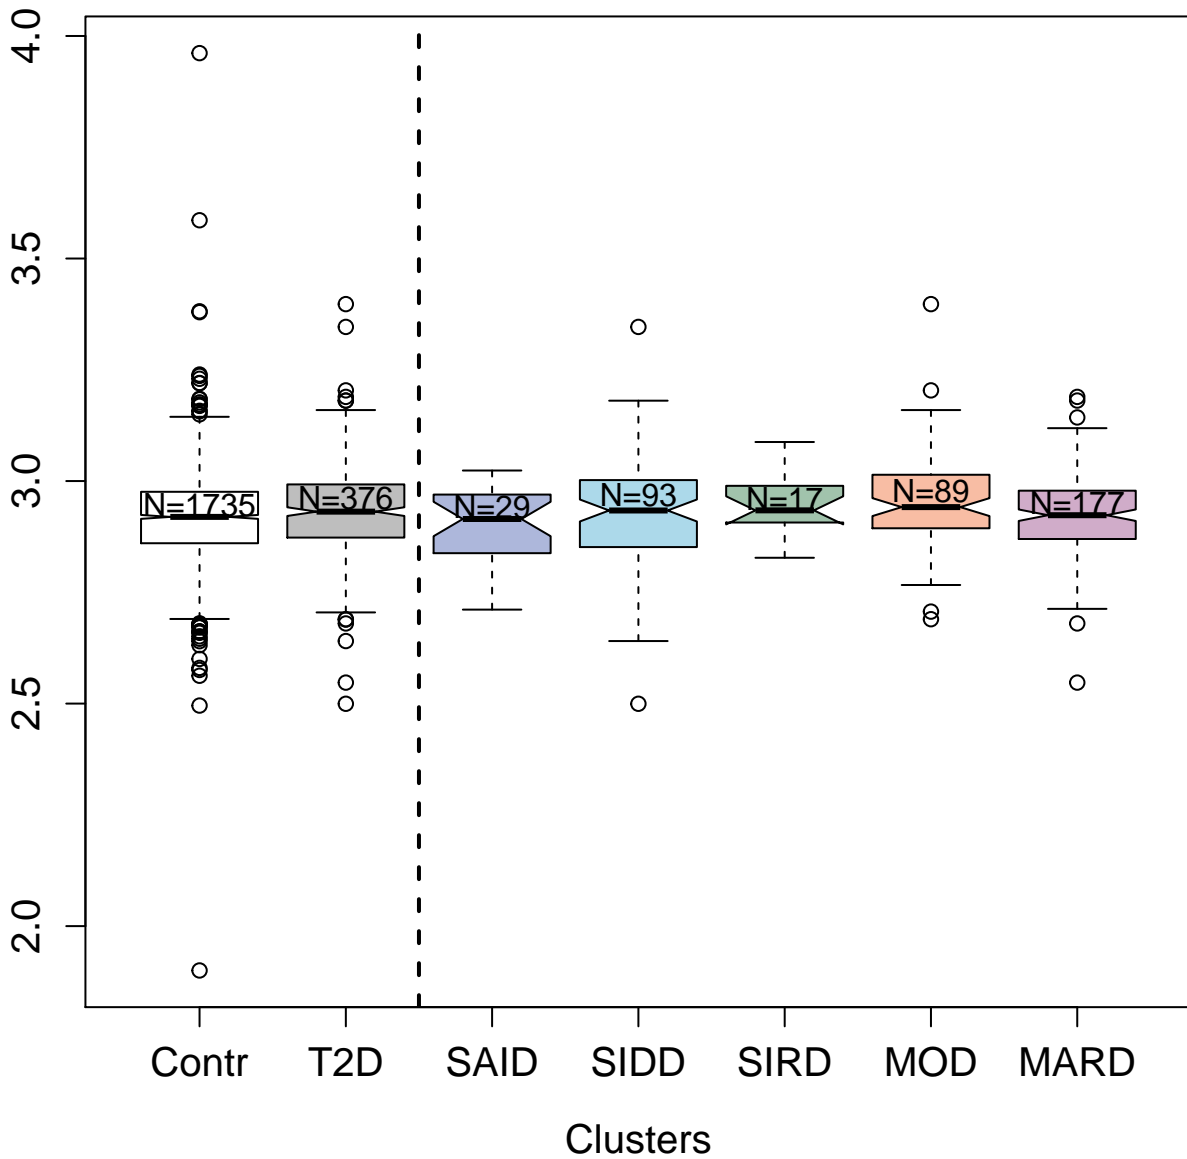

4588-1\_2 : Pancreatic hormone

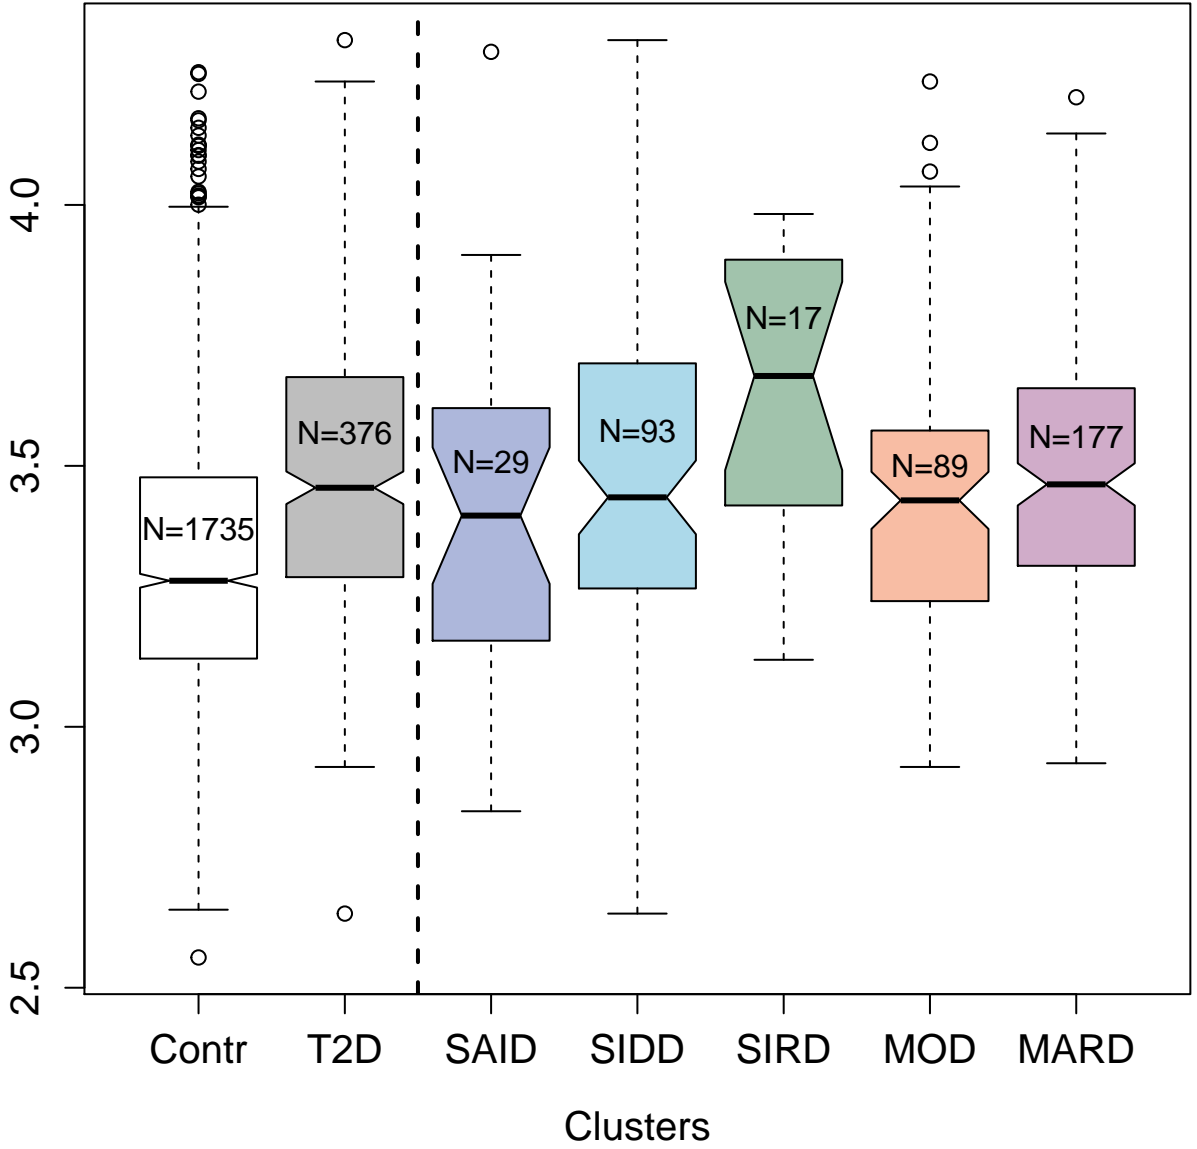

4708-3\_2 : Estradiol 17-beta-dehydrogenase 1

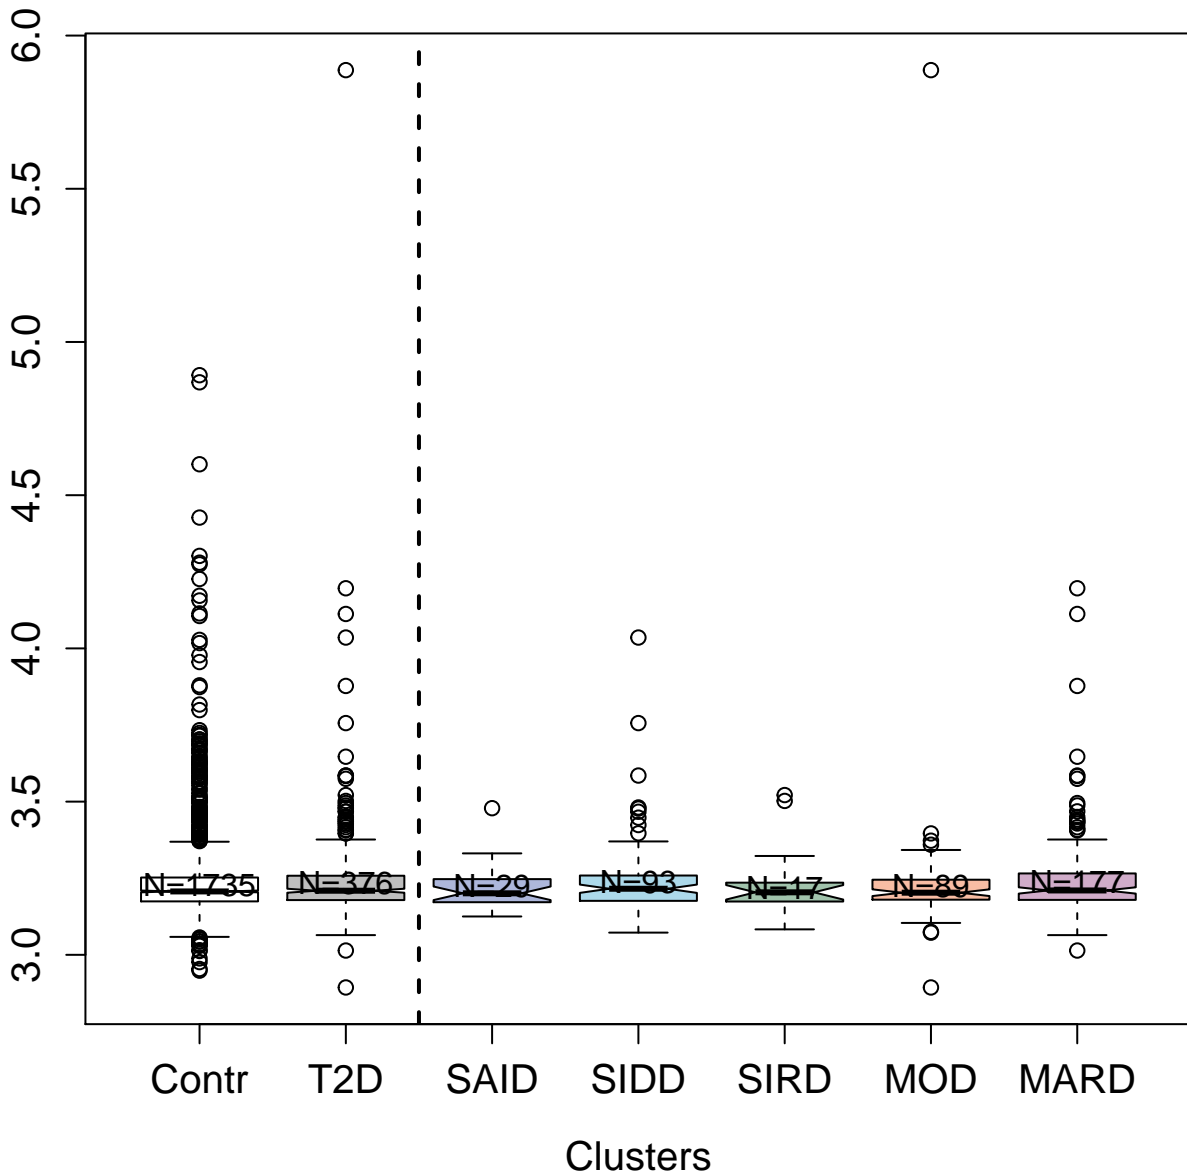

5526-53\_3 : Tumor necrosis factor receptor  
superfamily member 18

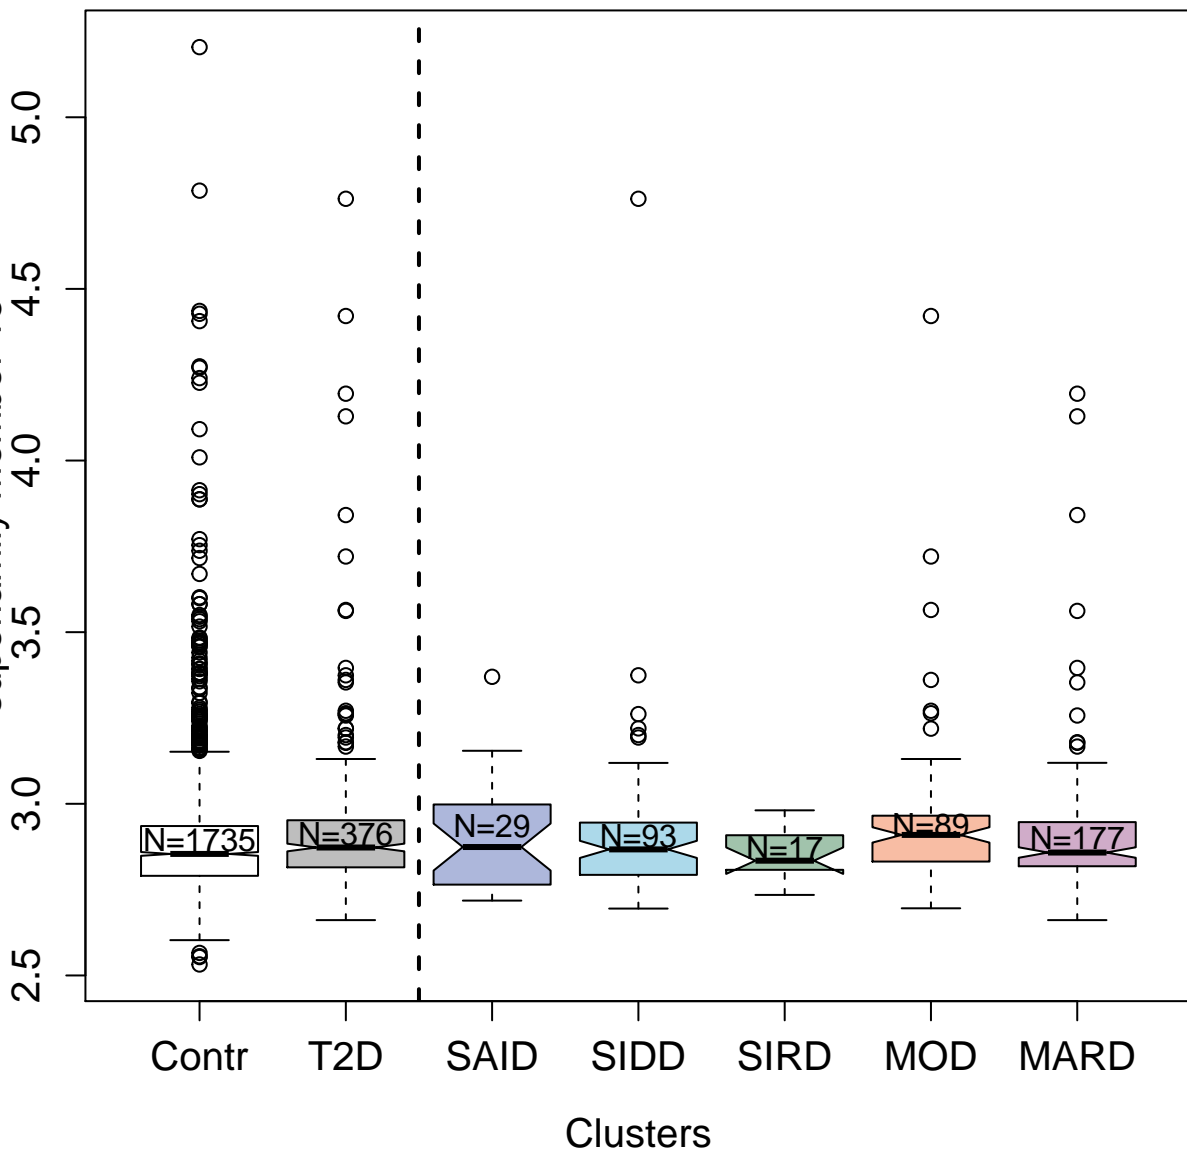

5103-30\_3 : Cell surface glycoprotein CD200

receptor\_1

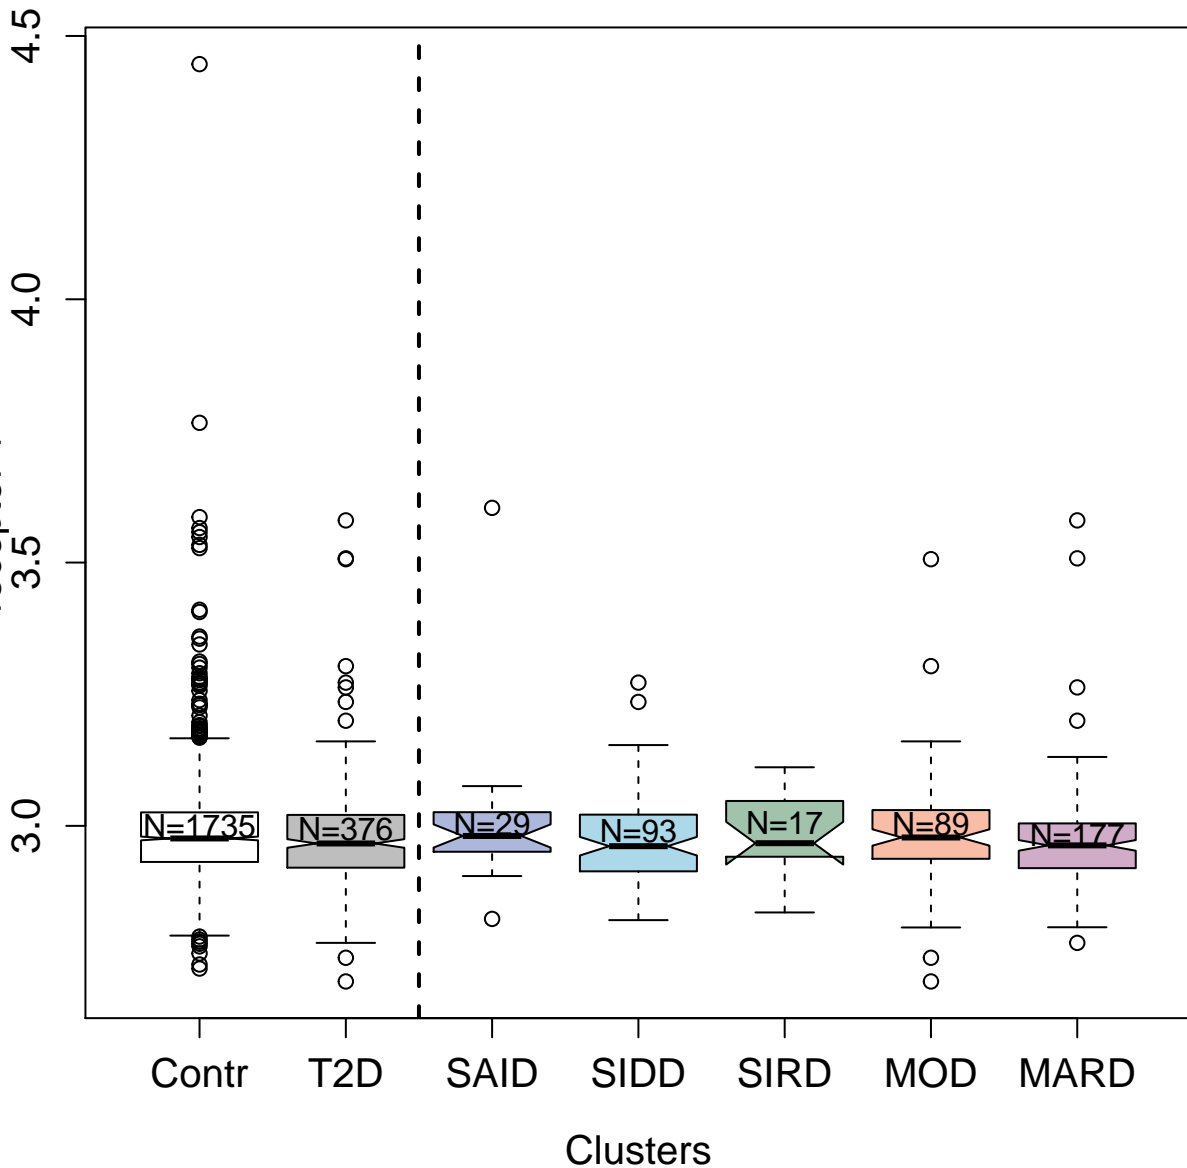

4436-1\_2 : Ectonucleoside triphosphate  
diphosphohydrolase 3

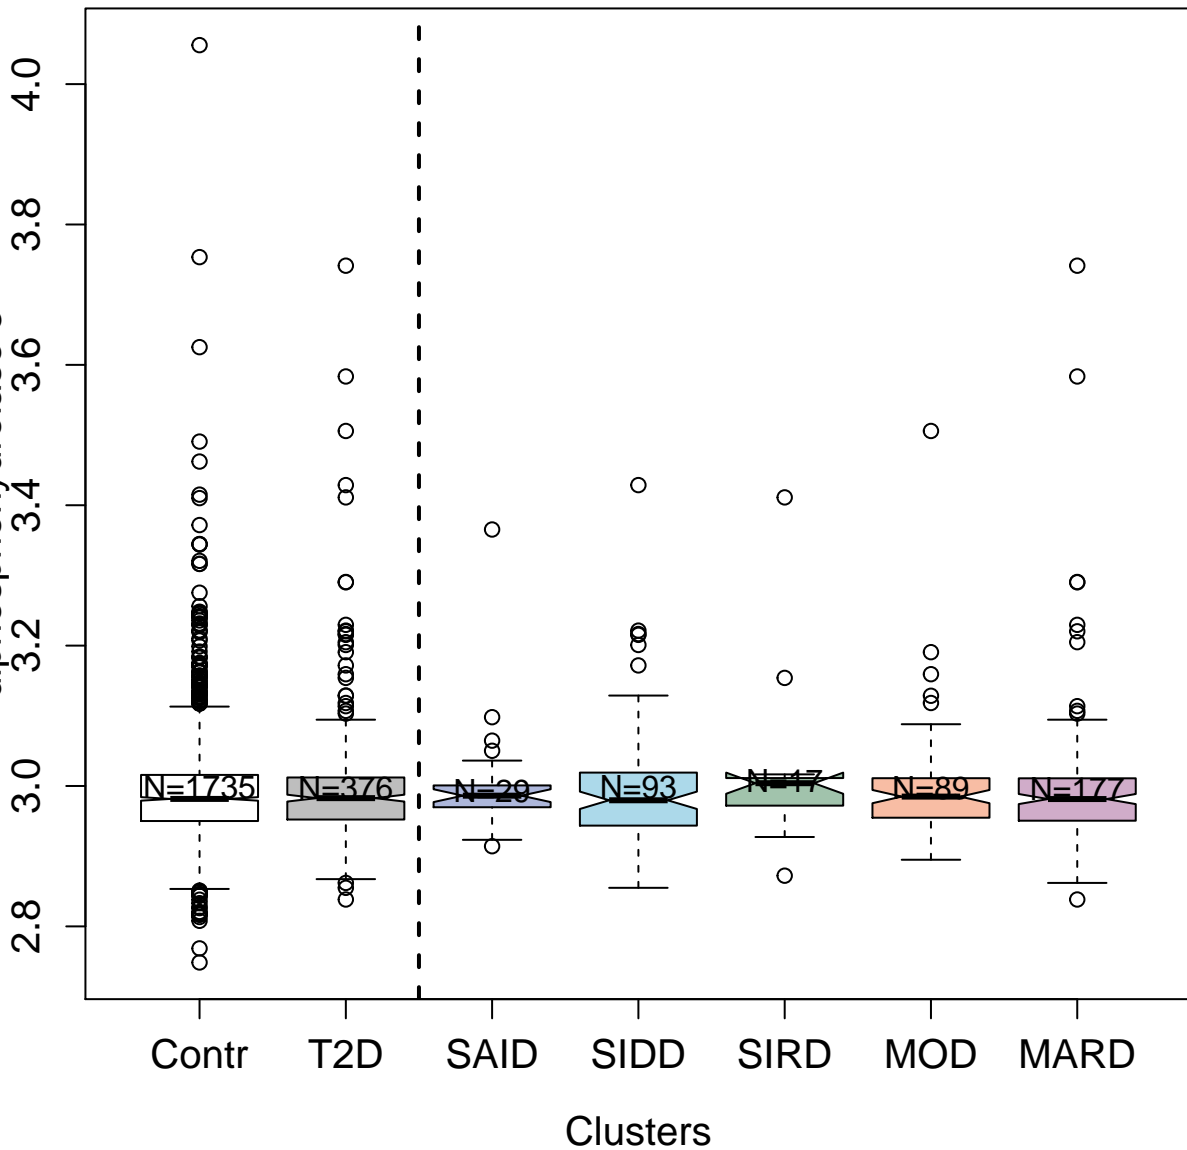

5110-84\_3 : Neurexin-1-beta

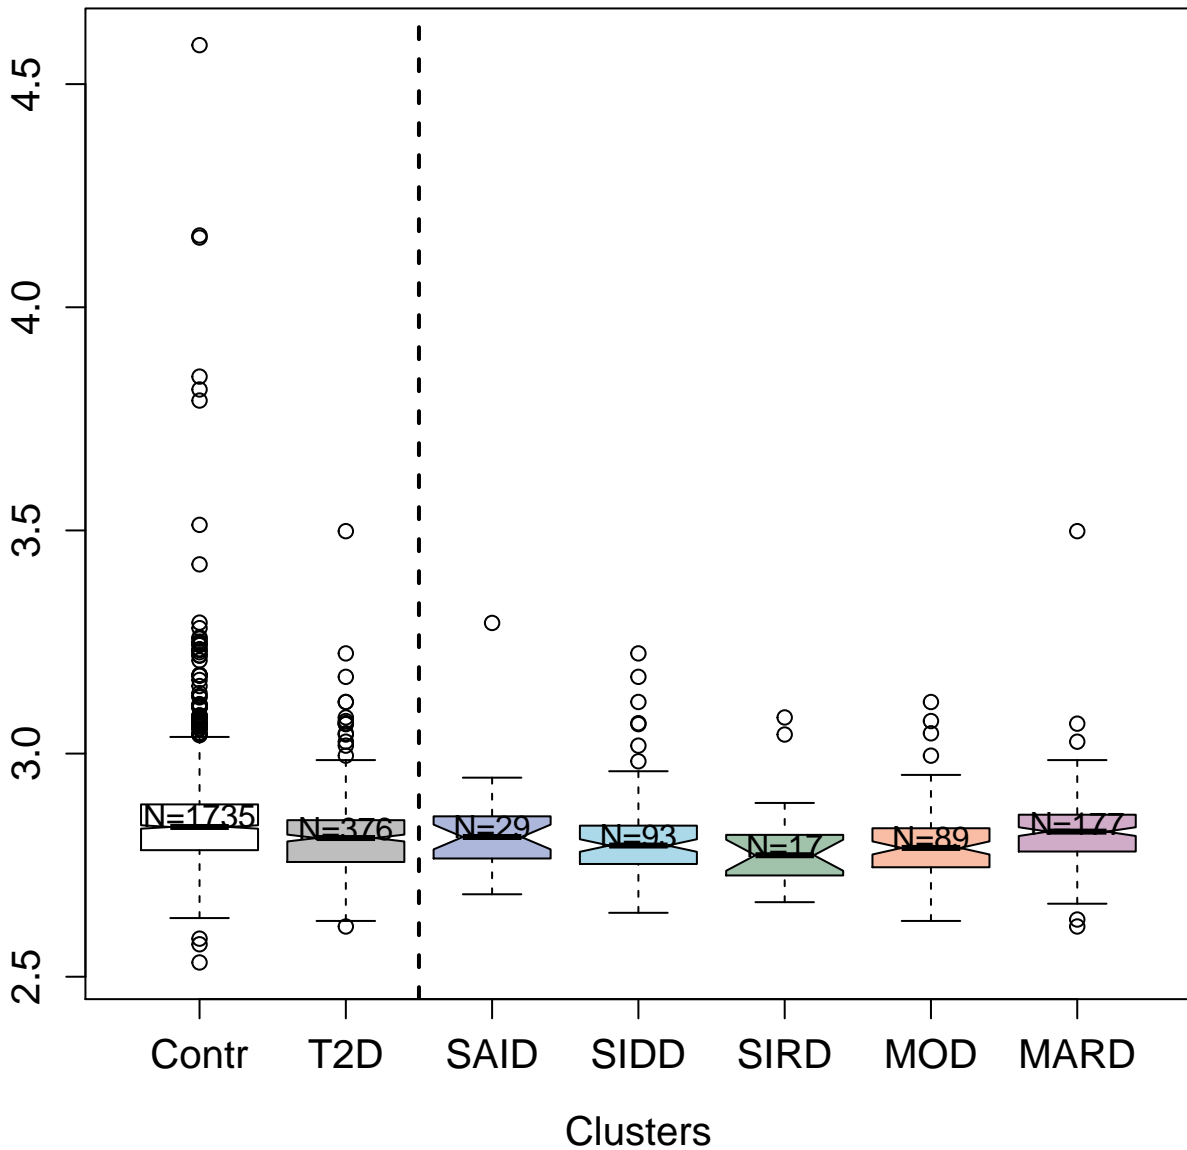



3728-52\_2 : Secretin

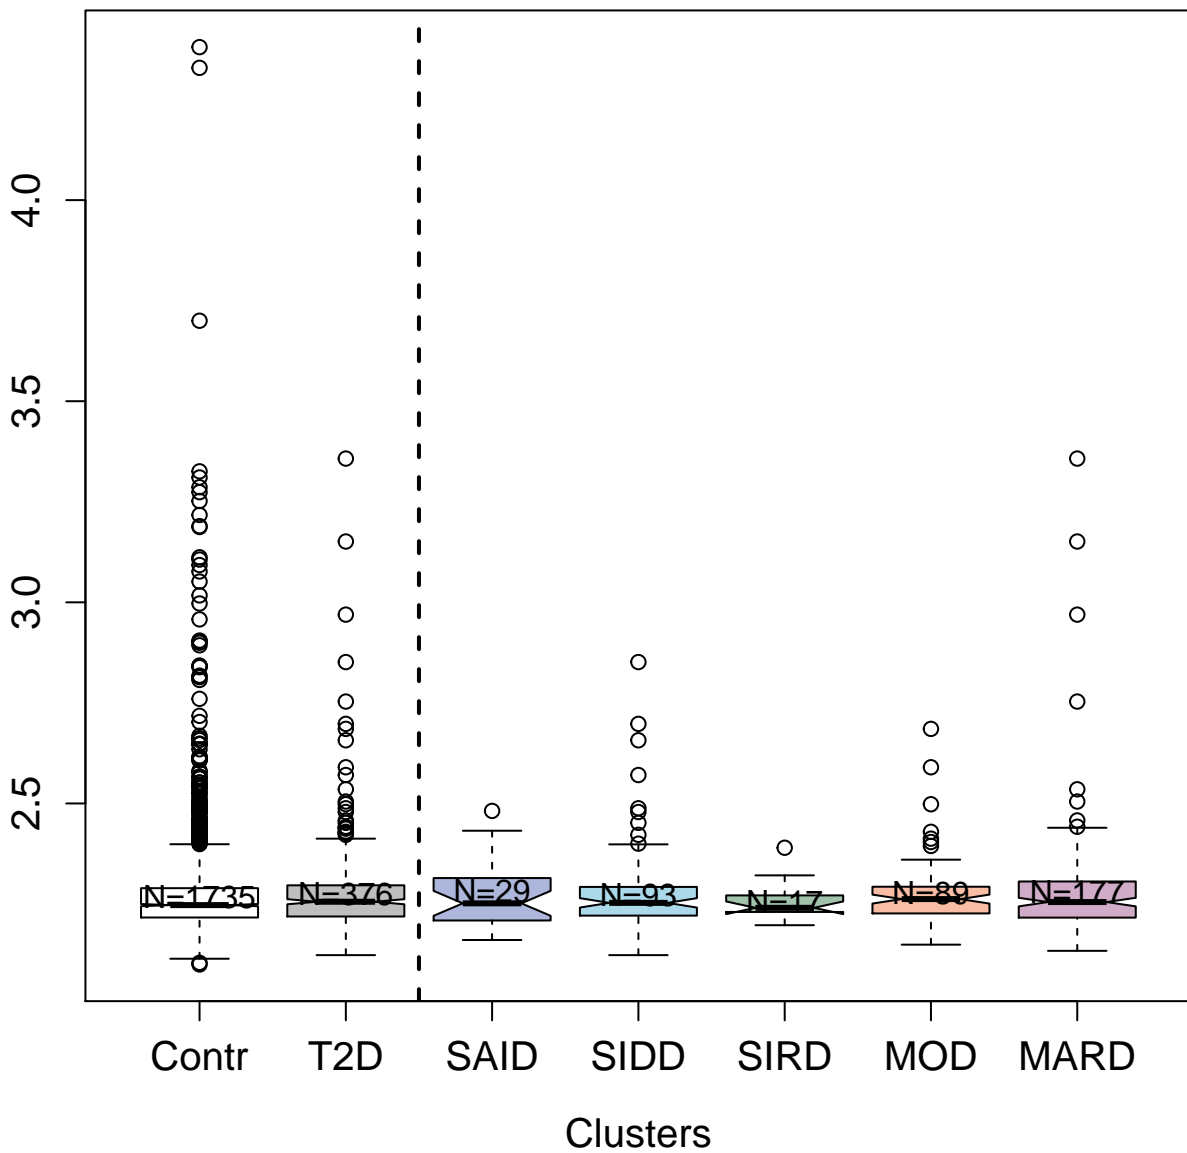

2788-55\_1 : Stromelysin-1

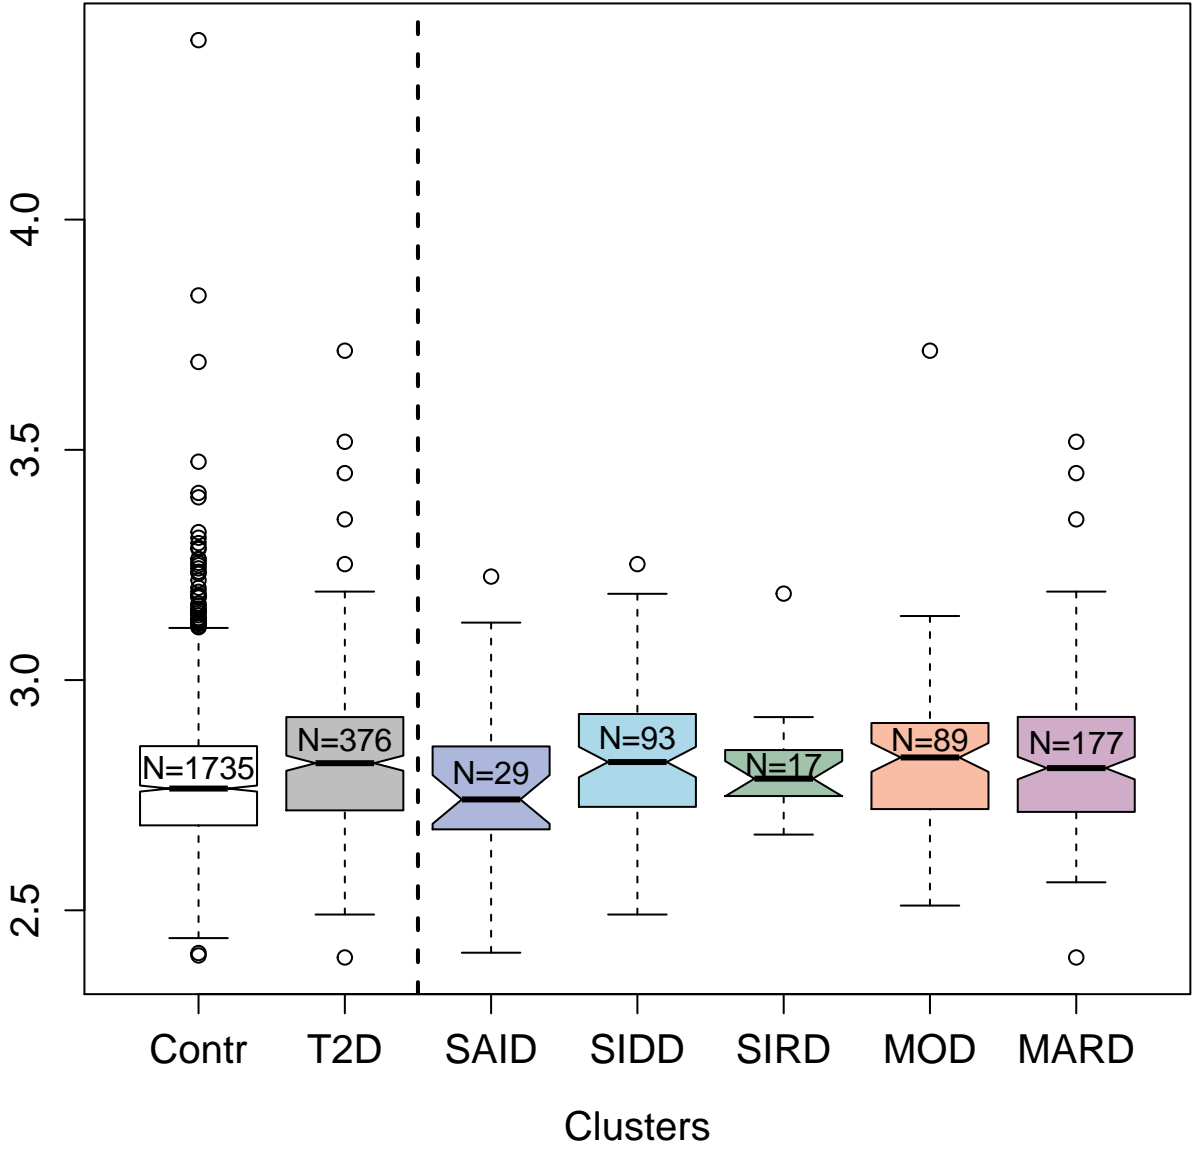

5065-8\_2 : CD83 antigen

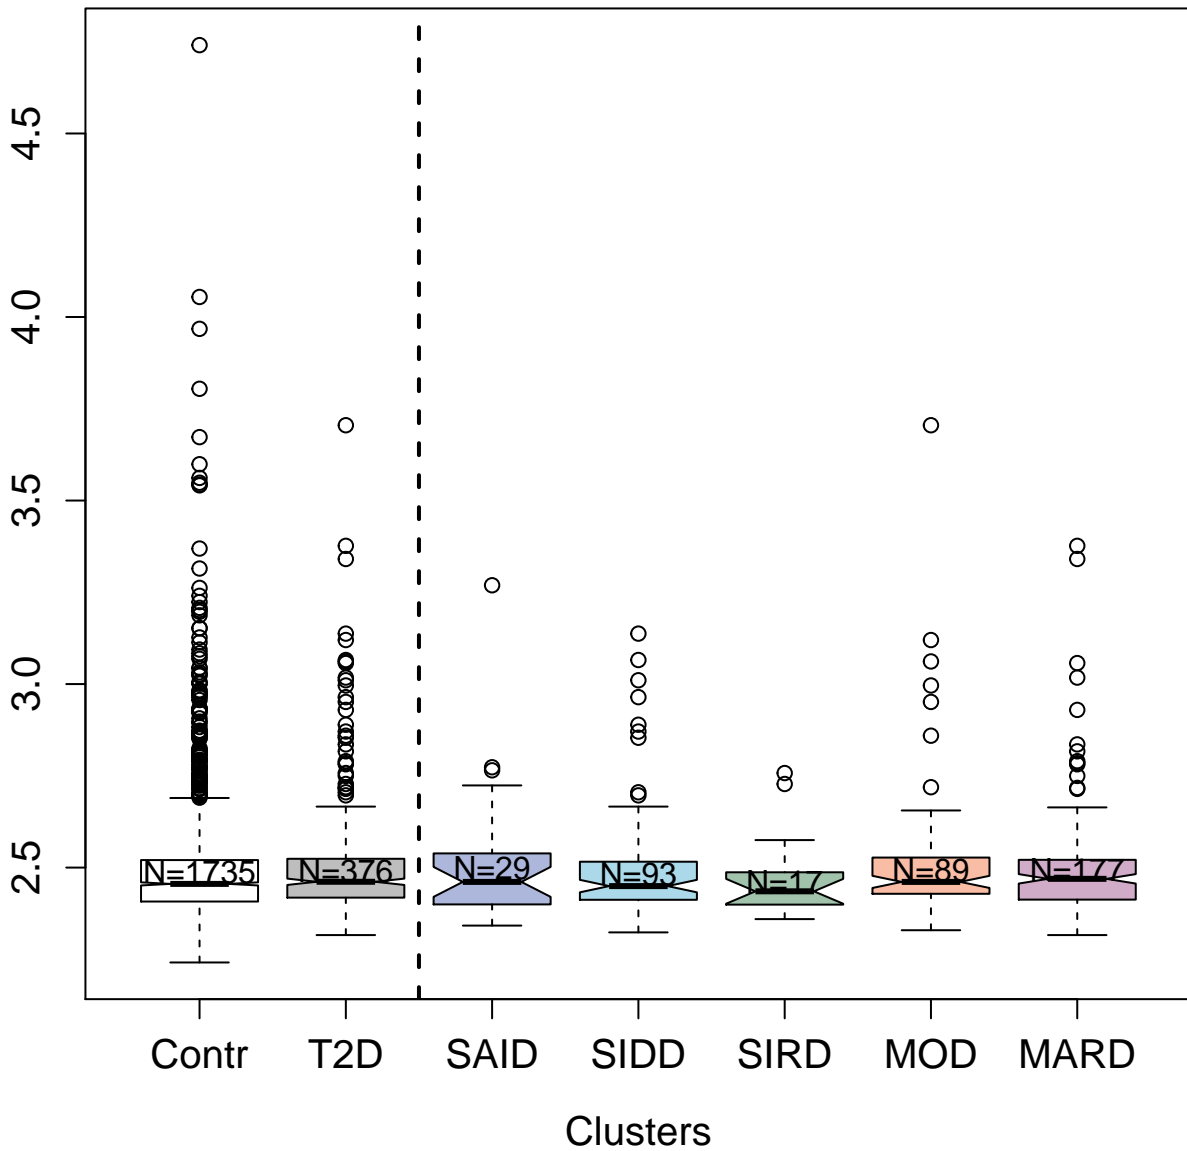

4567-82\_2 : SH2 domain-containing protein 1A

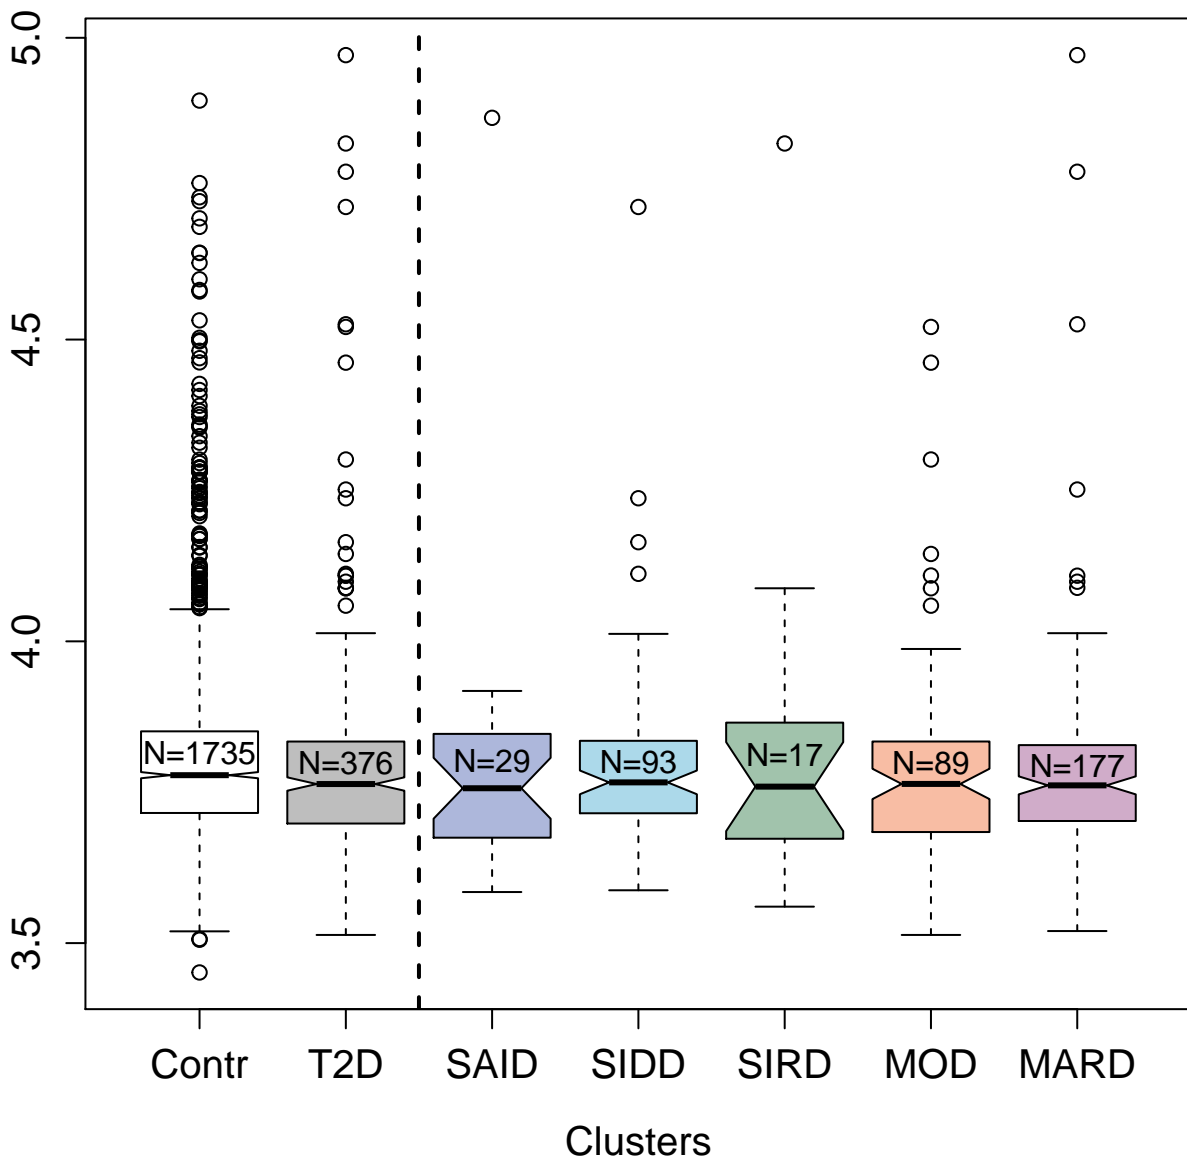

3073-51\_2 : Interleukin-18-binding protein

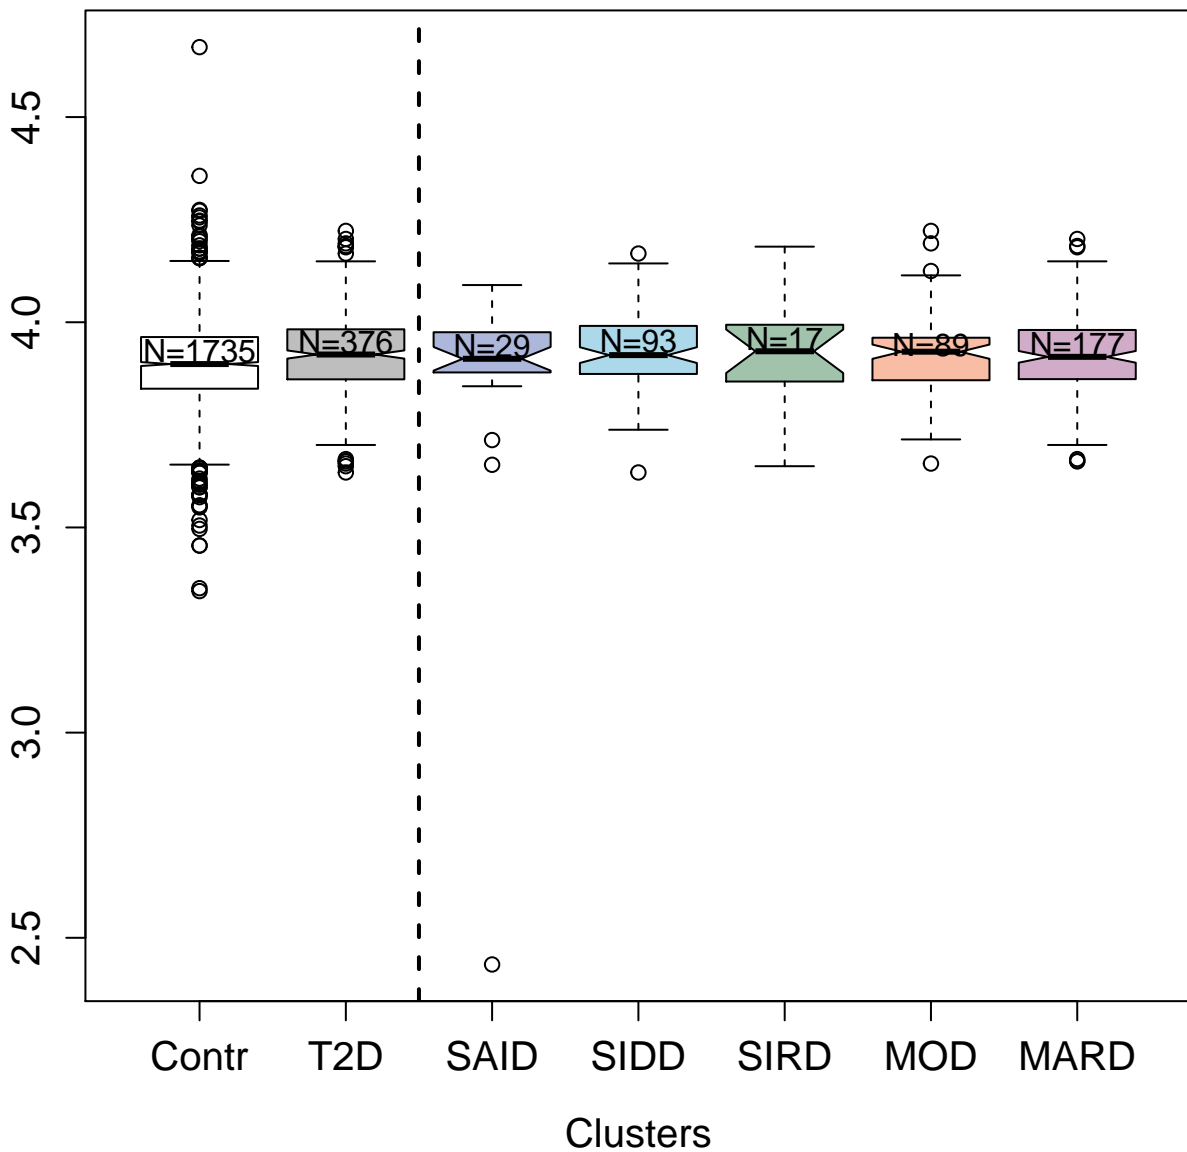

8485-7\_3 : Kelch-like ECH-associated protein 1

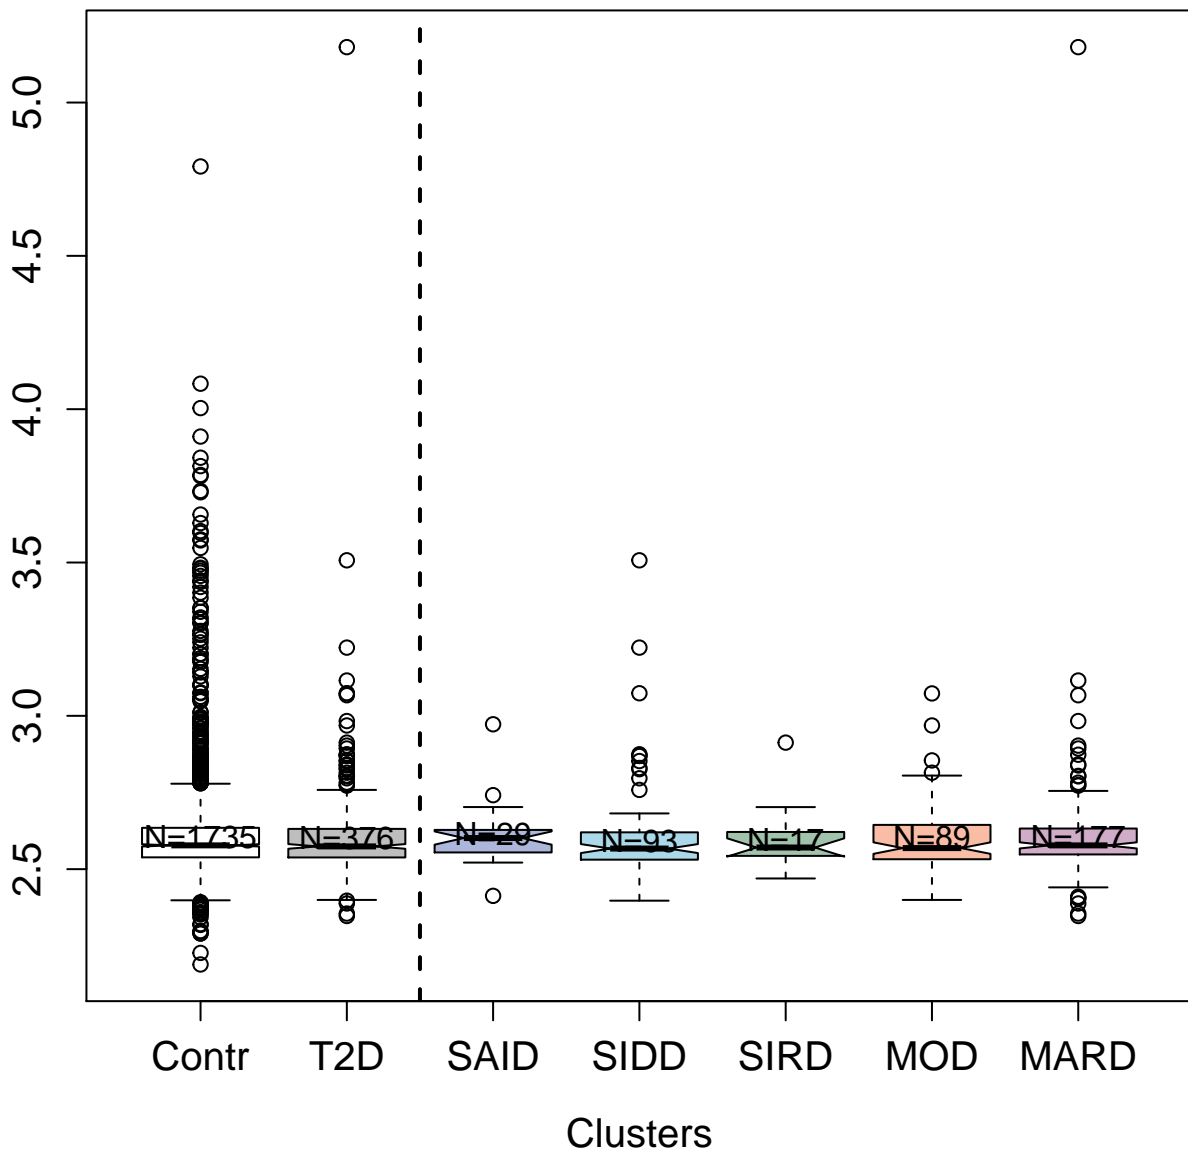

4930-21\_1 : Stanniocalcin-1

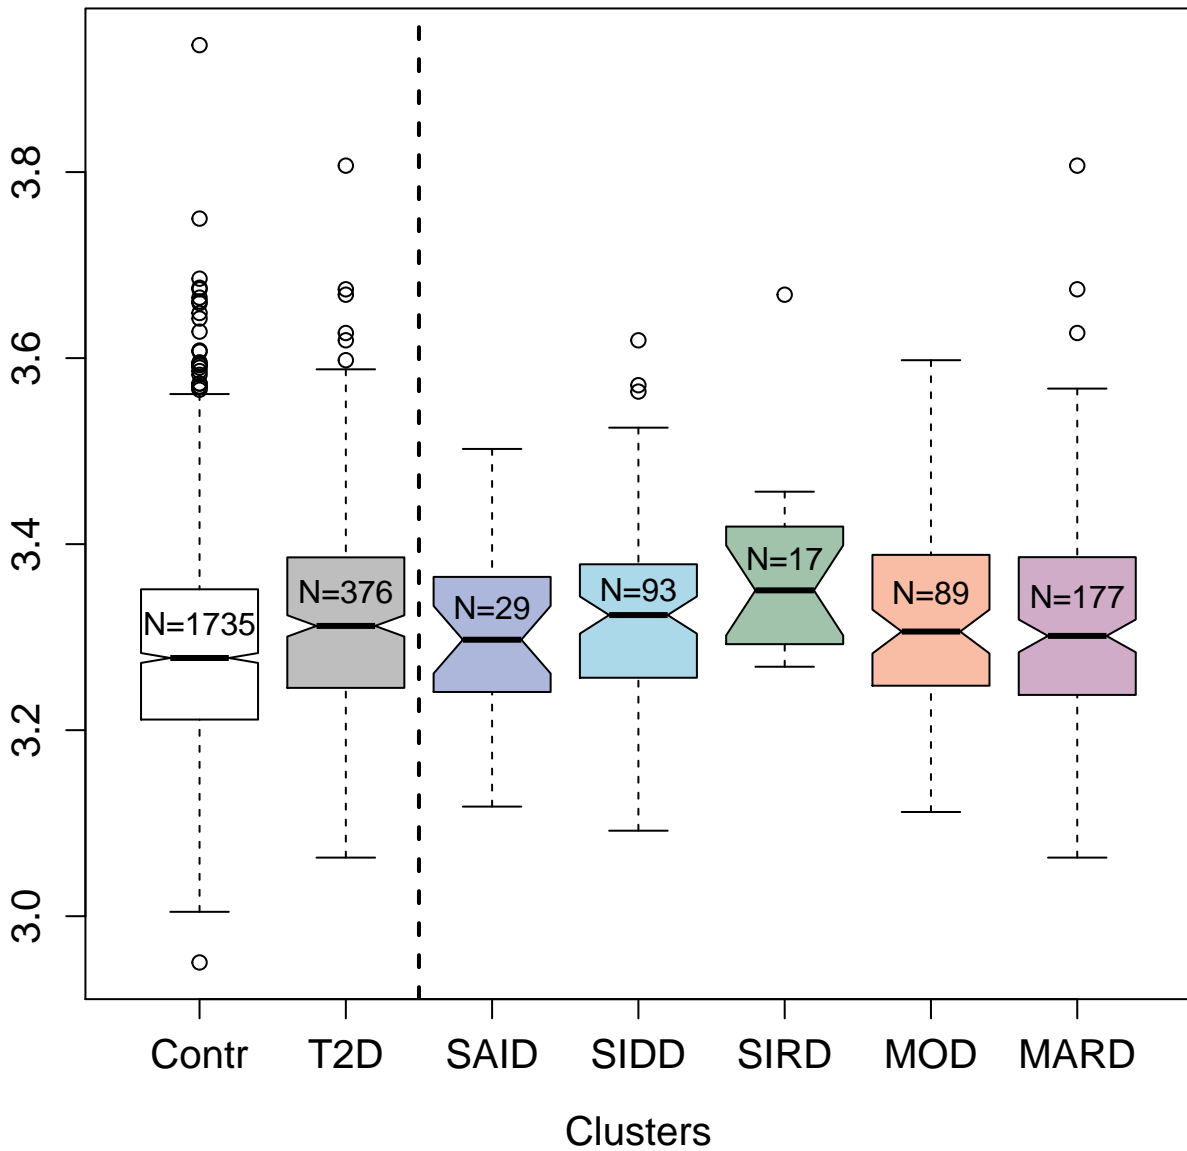

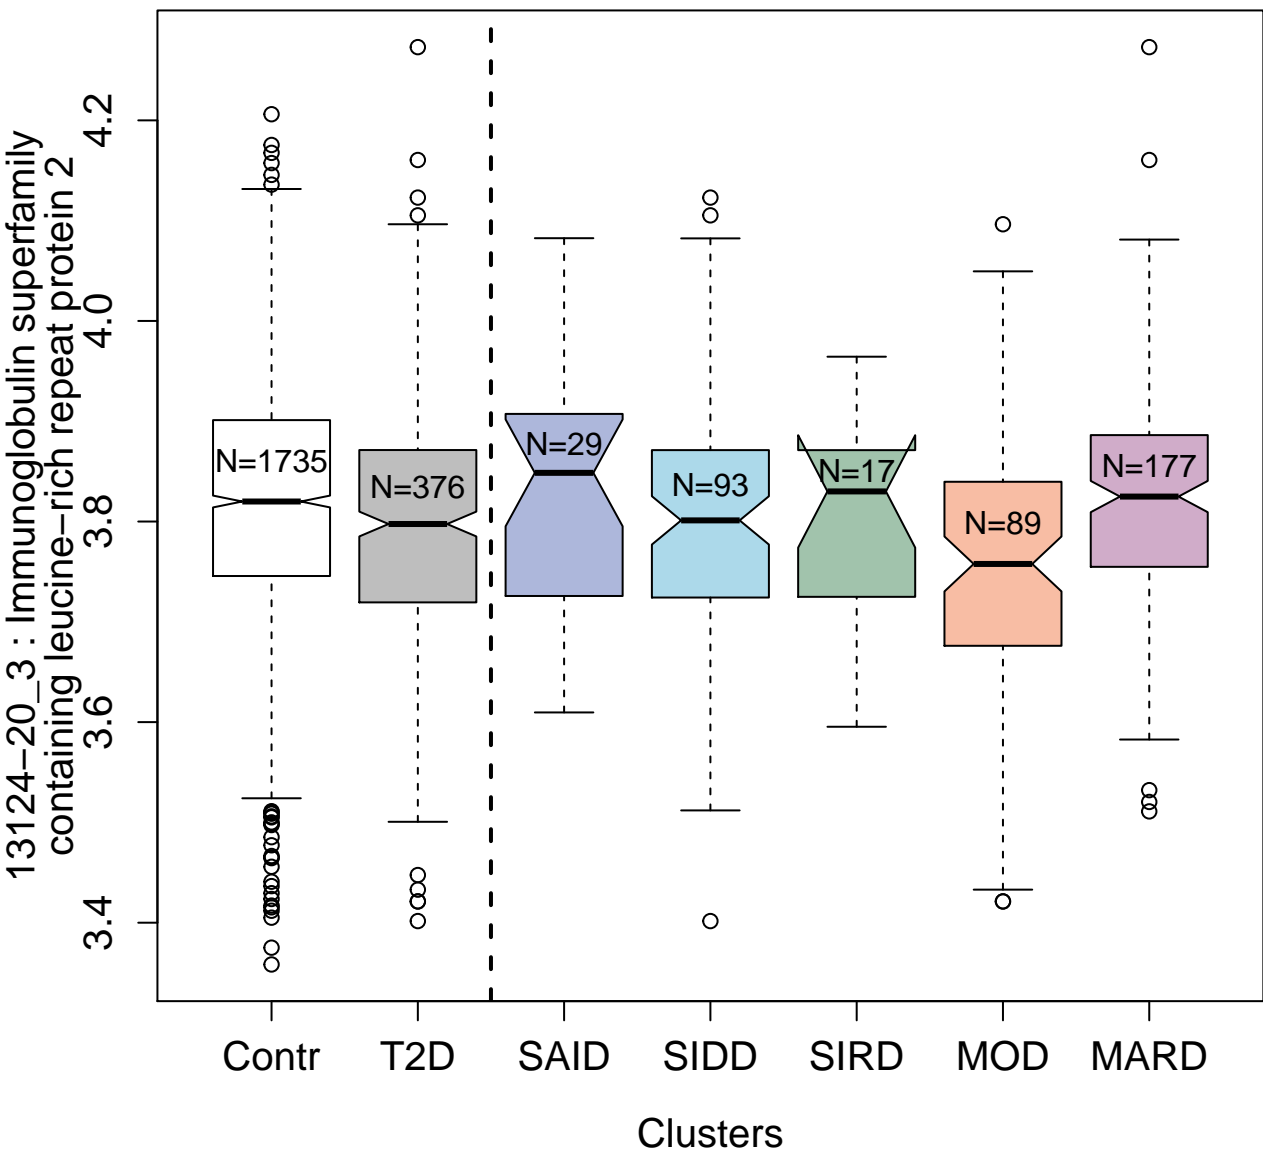



5098-79\_3 : Killer cell lectin-like receptor  
subfamily F member 1

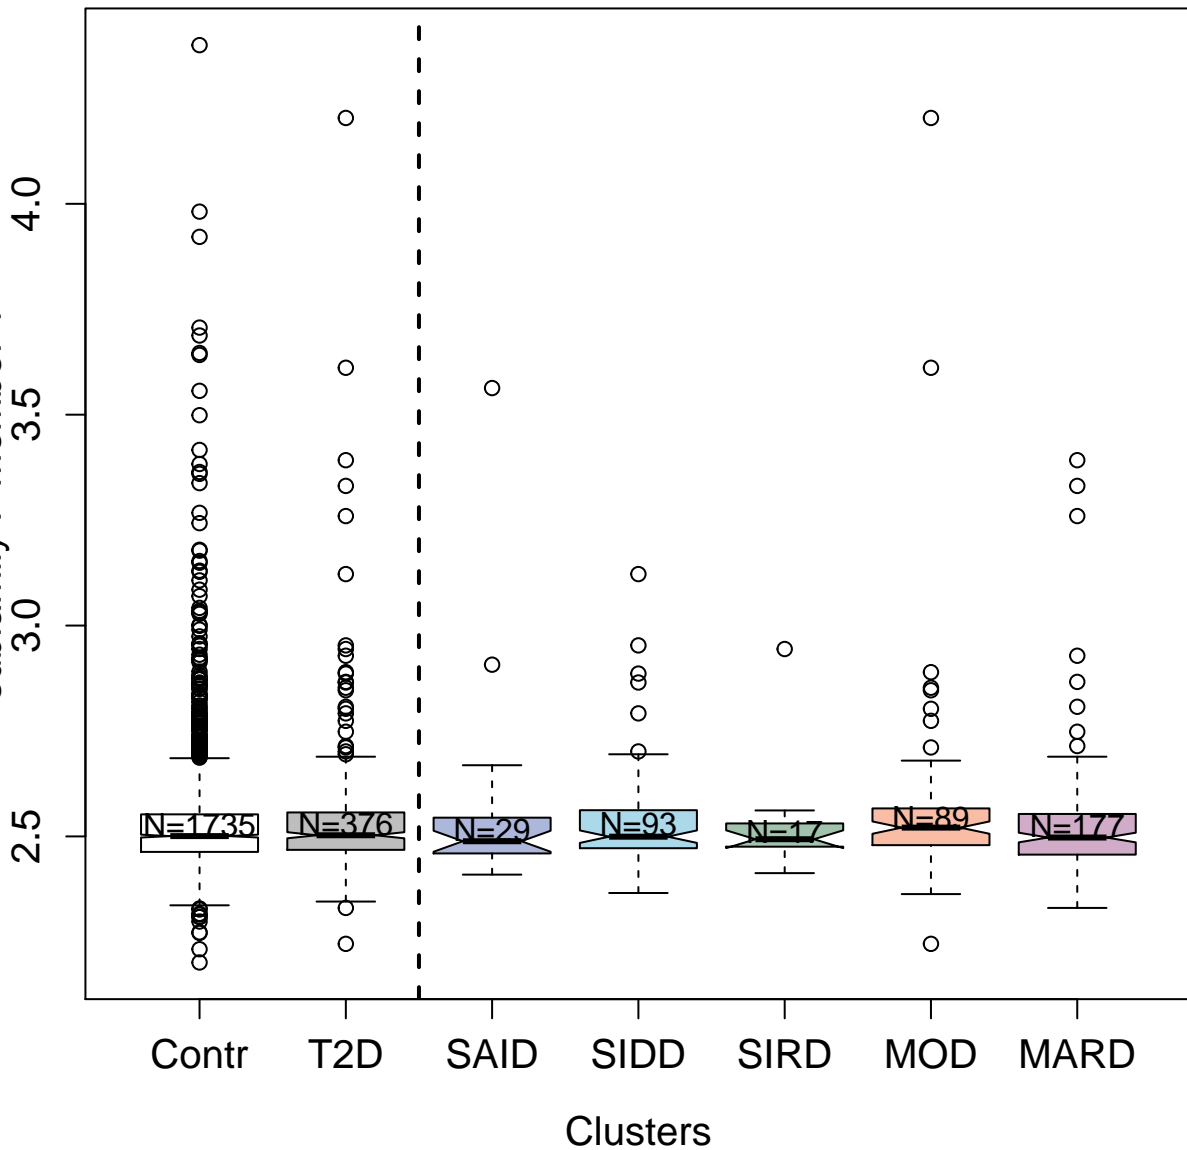

9171-11\_3 : Cysteine and glycine-rich protein 3

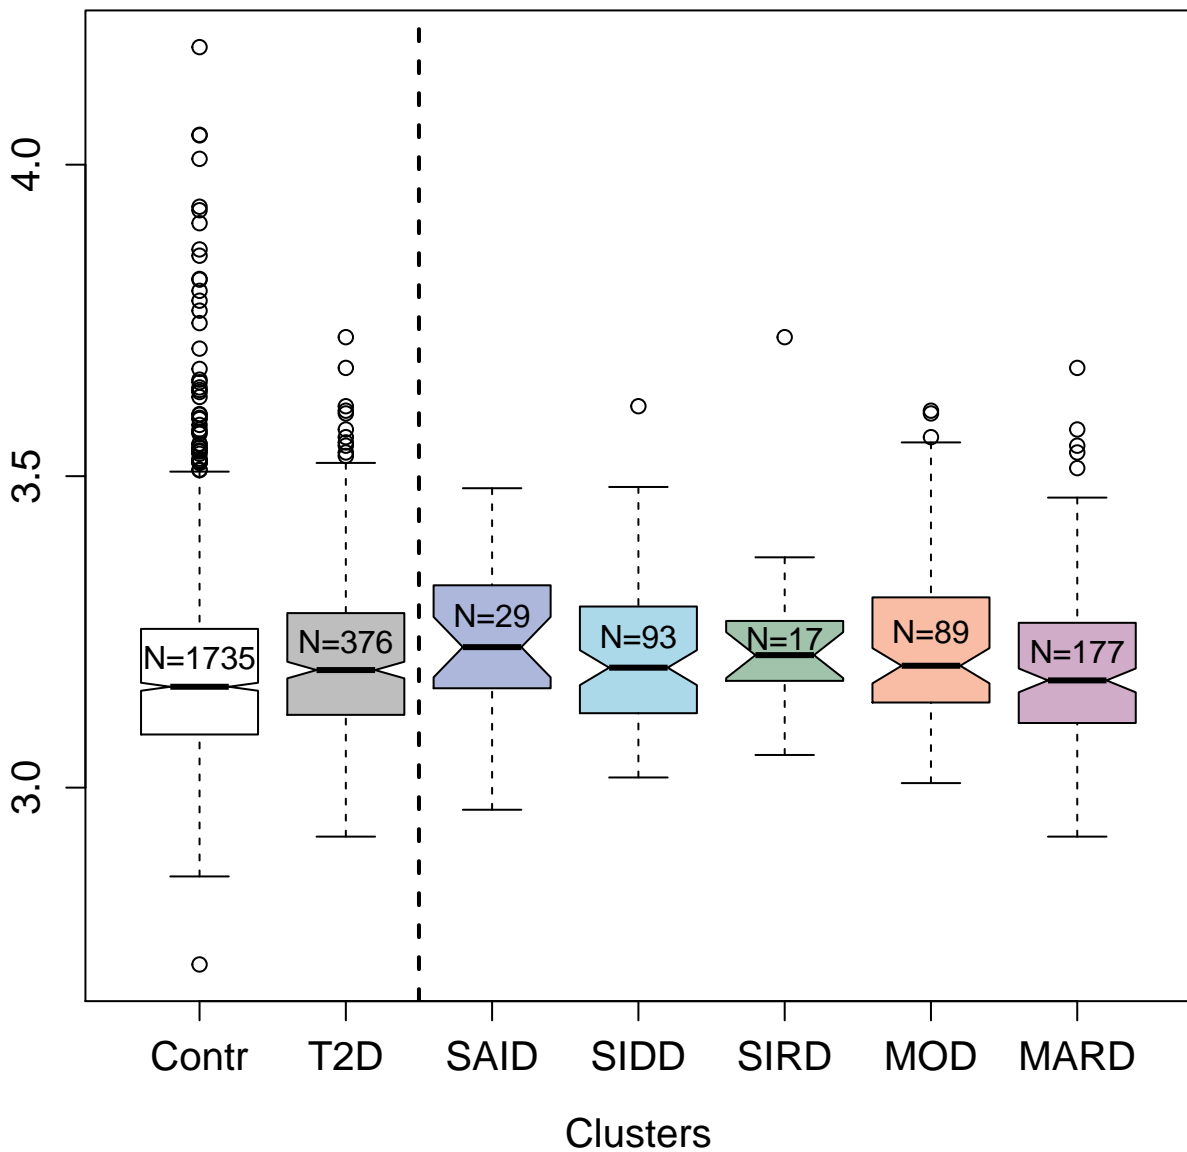

3447-64\_2 : Interleukin-8

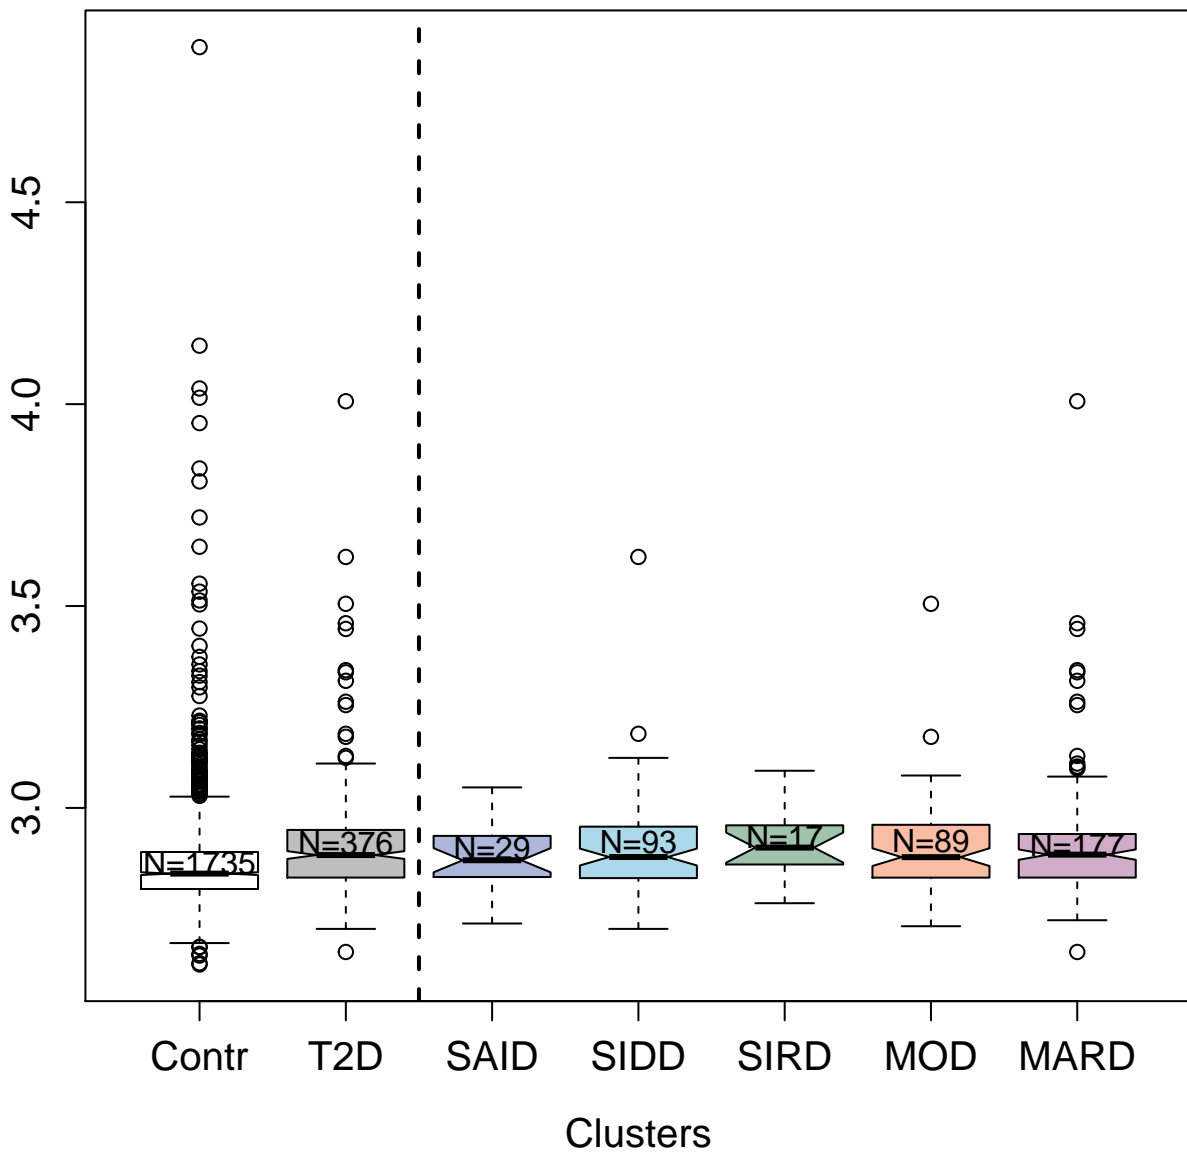

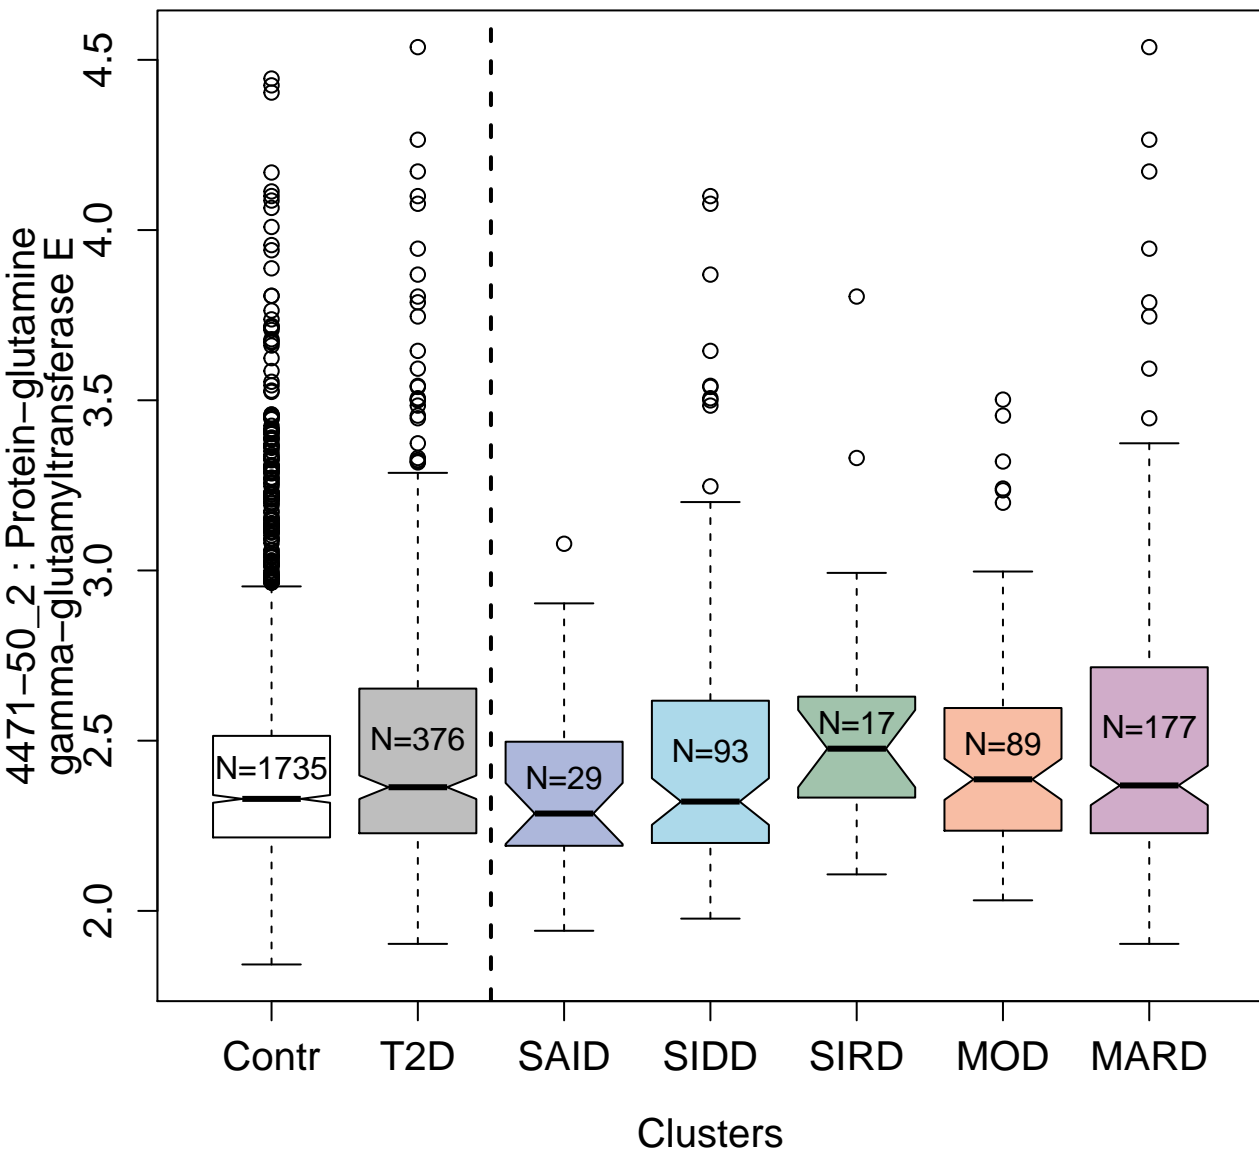

2449-1\_4 : Calcium-dependent phospholipase A2

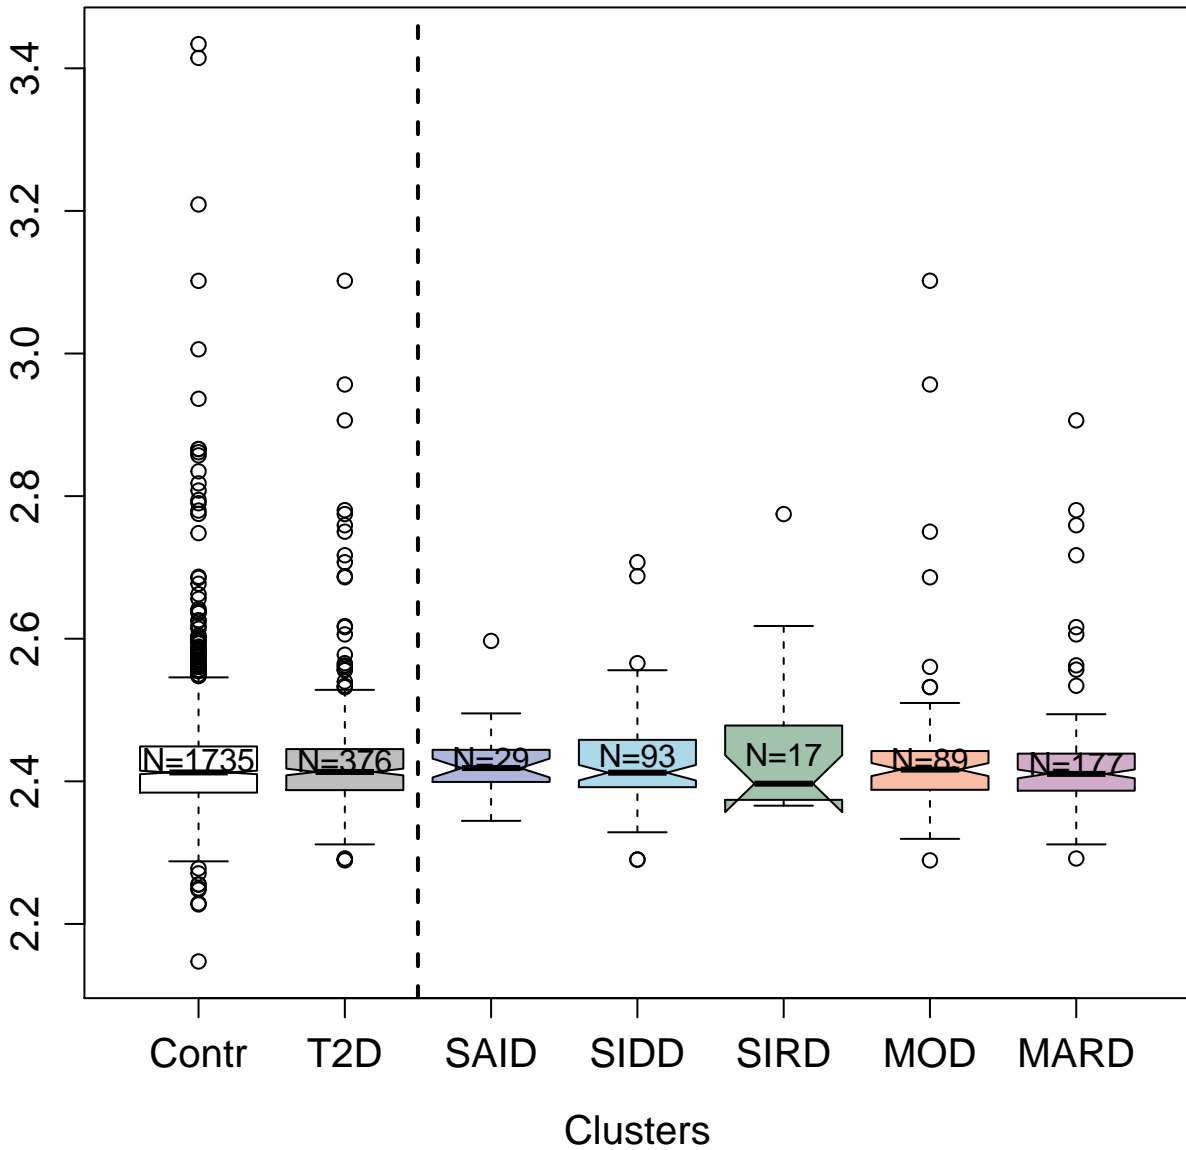

13133-73\_3 : Latent-transforming growth factor  
beta-binding protein 4

3.5  
3.0  
2.5

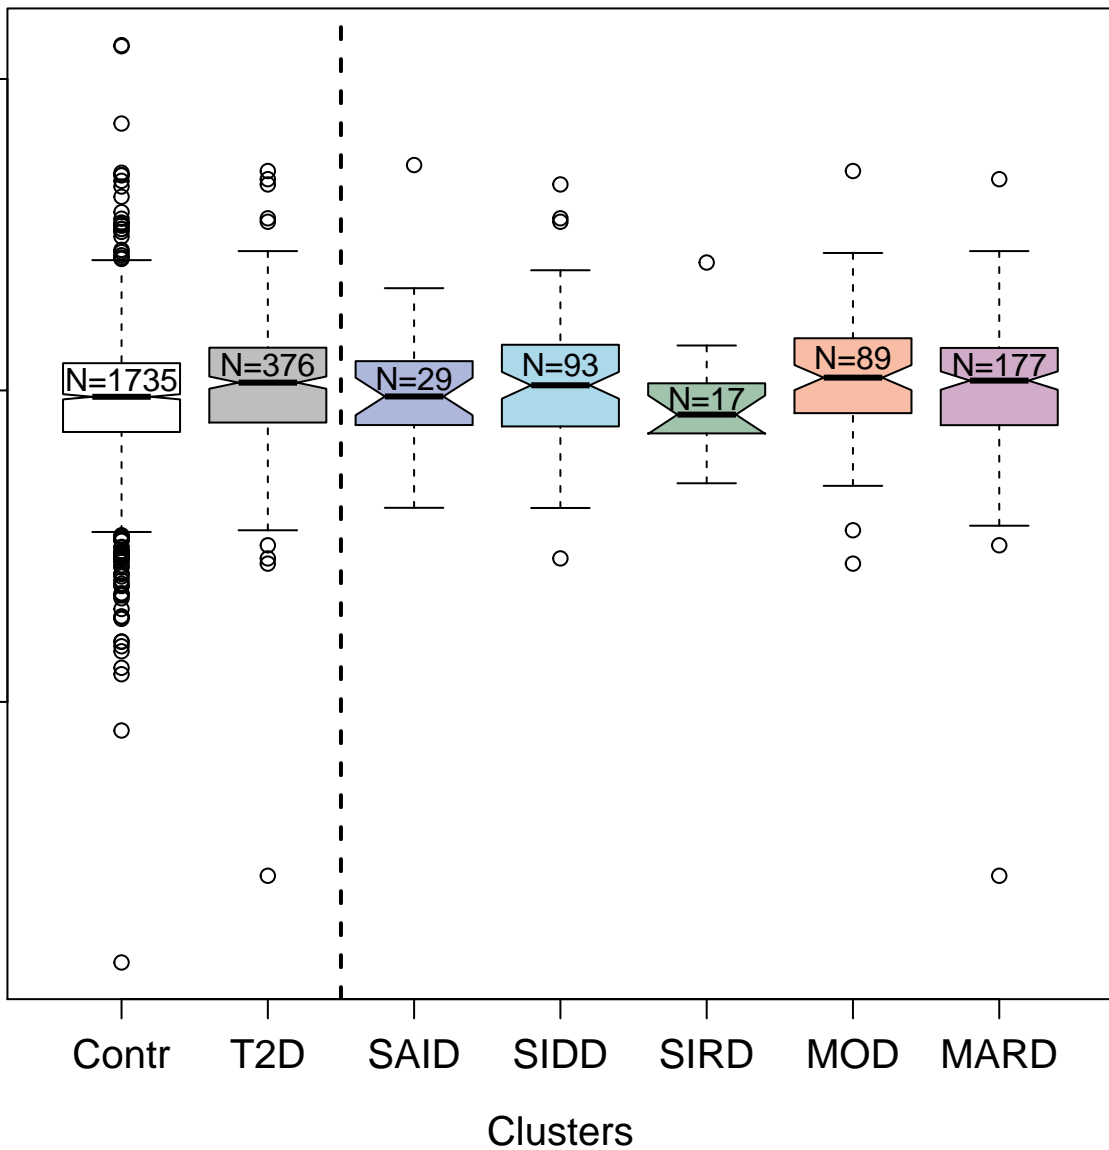

3365-7\_2 : Dickkopf-related protein 4

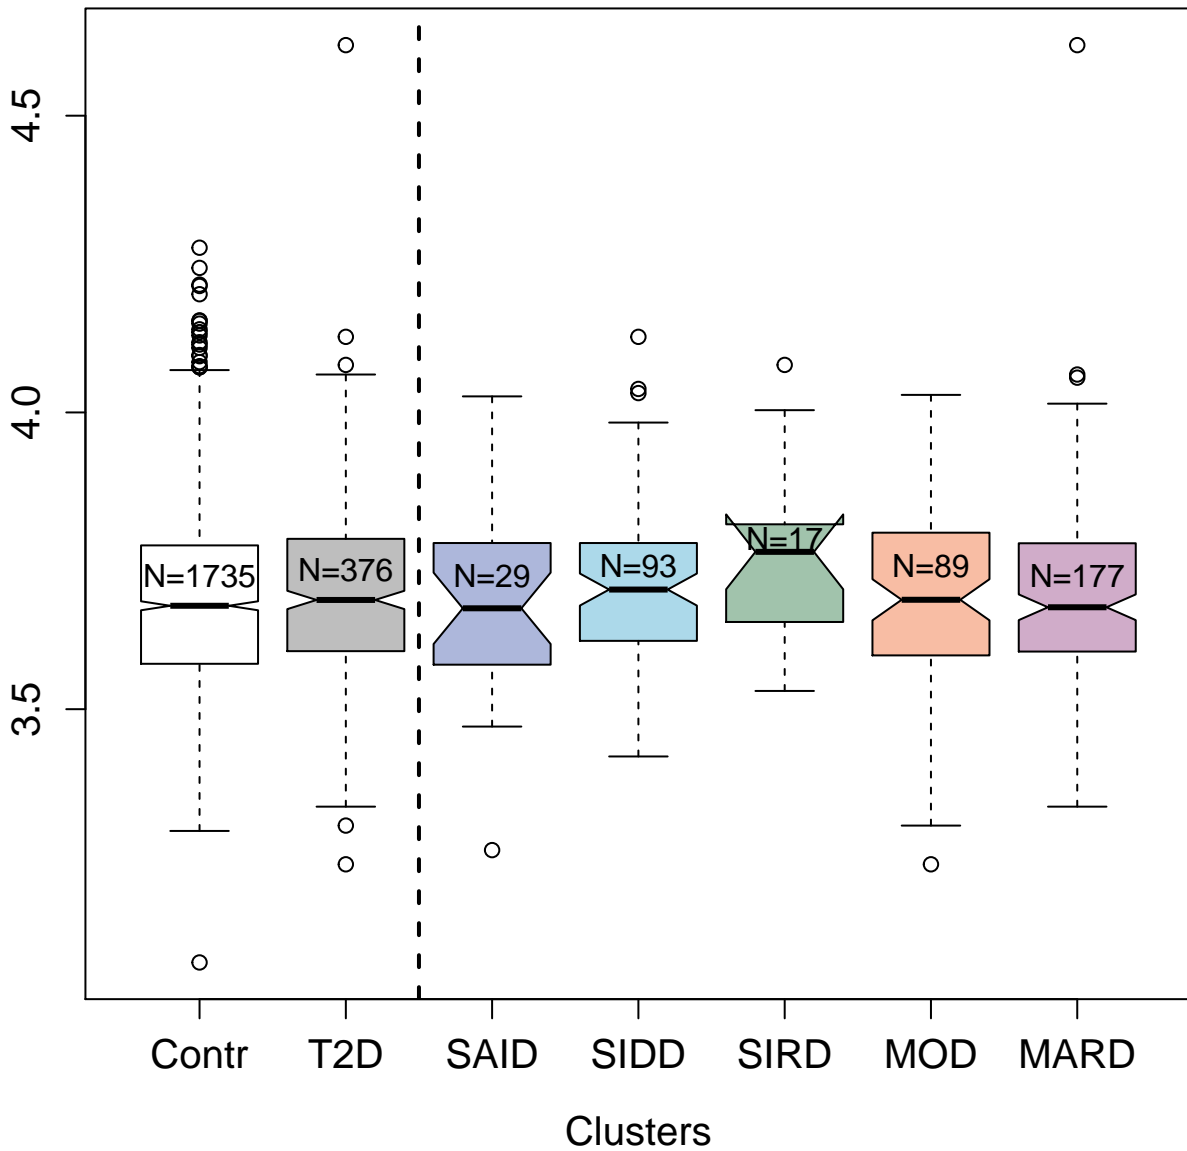

3391-10\_2 : Phosphatidylinositol 4,5-bisphosphate  
3-kinase catalytic subunit gamma isoform

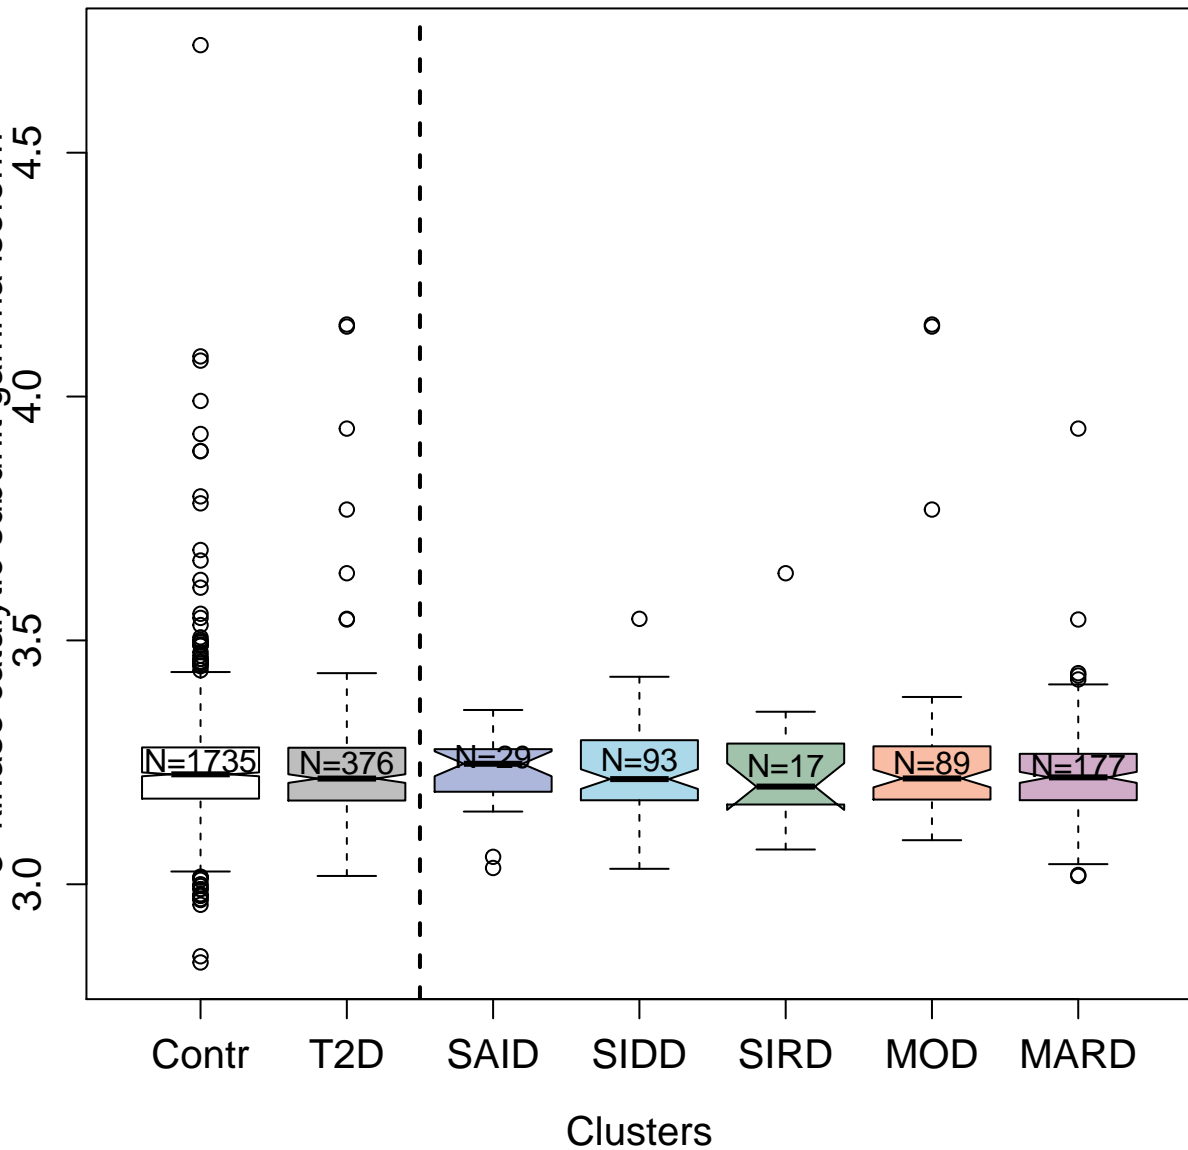



14150-7\_3 : Interleukin-36 alpha

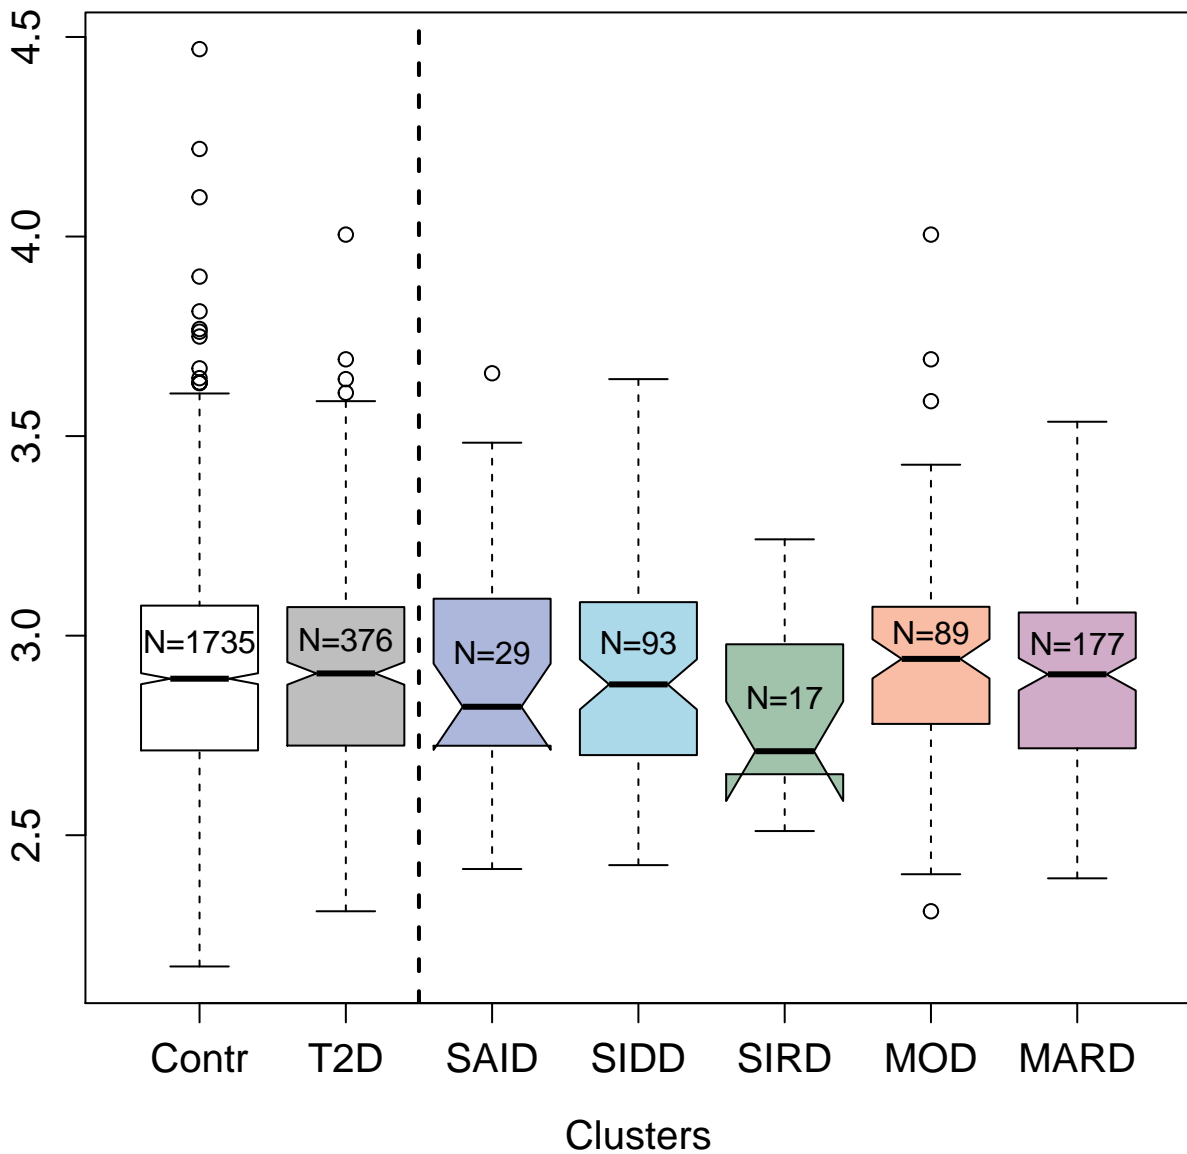

Supplement: Supplementary file [file media-14.pdf]
