# Supplementary material for: Metabolic and proteomic signatures of type 2 diabetes subtypes in an Arab population
Source: bioRxiv or medRxiv preprint supplement (doi:10.1101/2022.01.13.22269204), 2022-01-13

# AGE

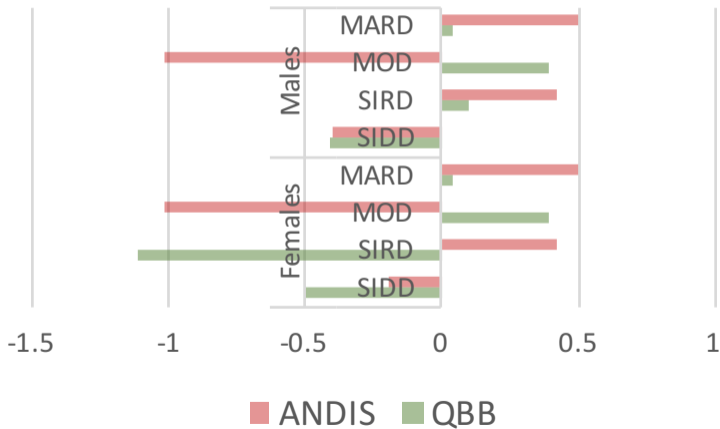

Supplement: Supplementary file [file media-8.pdf]
